# Supplementary material for: Transcriptional profiling of Hutchinson-Gilford Progeria syndrome fibroblasts reveals deficits in mesenchymal stem cell commitment to differentiation related to early events in endochondral ossification
Source: eLife journal article supplement (doi:10.7554/elife.81290), 2022-12-29
Supplement: table1-data1 [file elife-81290-table1-data1-v2.zip]

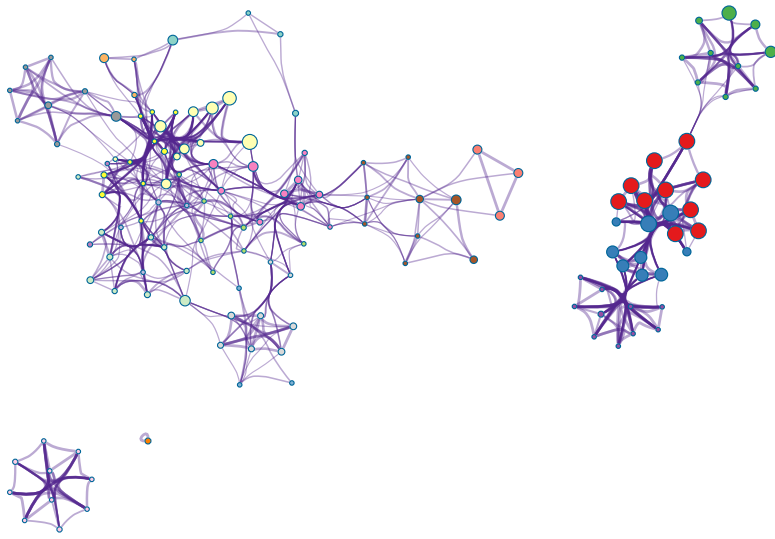

- HDACs deacetylate histones
- chromatin silencing
- negative regulation of megakaryocyte differentiation
- negative regulation of gene silencing
- Genotoxicity pathway
- Lung fibrosis
- NABA CORE MATRISOME
- Senescence and autophagy in cancer
- antimicrobial humoral response
- maintenance of location
- blood vessel development
- PID AP1 PATHWAY
- extracellular matrix organization
- Extracellular vesicles in the crosstalk of cardiac cells
- lipid storage
- maintenance of blood-brain barrier
- Nop56p-associated pre-rRNA complex
- cellular response to hypoxia
- response to retinoic acid
- response to mechanical stimulus
