# Supplementary material for: Transcriptional profiling of Hutchinson-Gilford Progeria syndrome fibroblasts reveals deficits in mesenchymal stem cell commitment to differentiation related to early events in endochondral ossification
Source: eLife journal article supplement (doi:10.7554/elife.81290), 2022-12-29
Supplement: table1-data1 [file elife-81290-table1-data1-v2.zip]

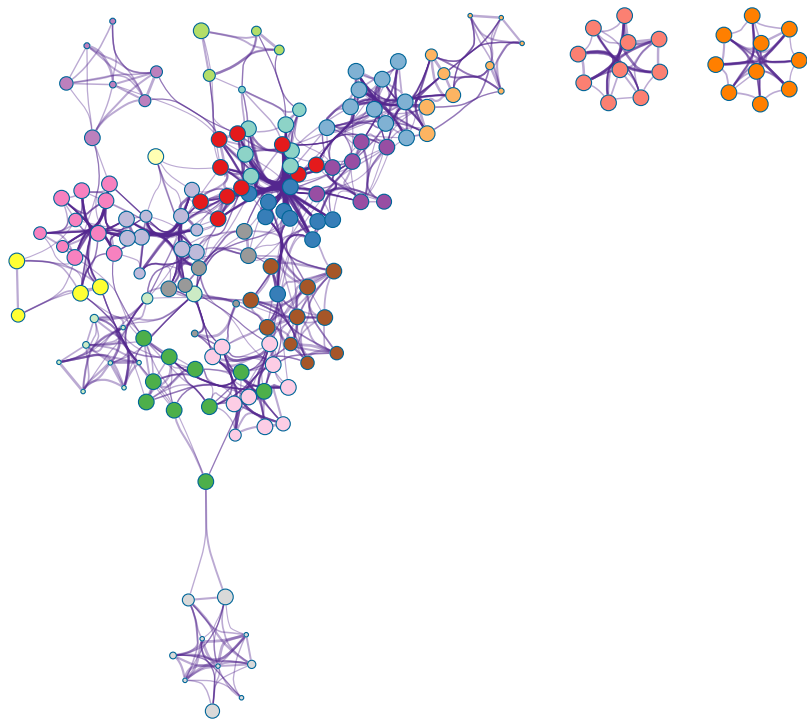

- Cell Cycle
- mitotic cell cycle process
- cellular response to DNA damage stimulus
- microtubule cytoskeleton organization
- mRNA metabolic process
- DNA replication
- meiotic cell cycle
- Retinoblastoma gene in cancer
- positive regulation of cell cycle process
- metaphase plate congression
- PID PLK1 PATHWAY
- Cell cycle
- histone modification
- G2/M Transition
- centrosome cycle
- protein localization to chromosome
- regulation of cell cycle G2/M phase transition
- PID AURORA B PATHWAY
- CEN complex
- sister chromatid cohesion
