# Supplementary material for: Transcriptional profiling of Hutchinson-Gilford Progeria syndrome fibroblasts reveals deficits in mesenchymal stem cell commitment to differentiation related to early events in endochondral ossification
Source: eLife journal article supplement (doi:10.7554/elife.81290), 2022-12-29
Supplement: table1-data1 [file elife-81290-table1-data1-v2.zip]

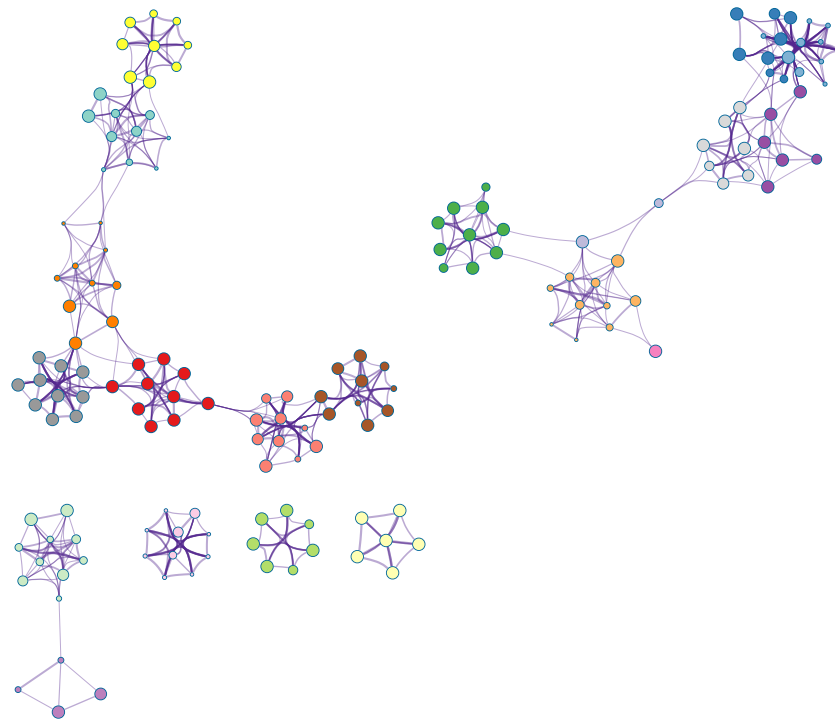

- mRNA metabolic process
- cellular response to DNA damage stimulus
- Genes related to primary cilium development (based
- cell division
- regulation of mRNA metabolic process
- histone modification
- nucleocytoplasmic transport
- positive regulation of organelle organization
- mRNA catabolic process
- macromolecule methylation
- proteolysis involved in cellular protein catabolic process
- microtubule cytoskeleton organization
- mRNA transport
- DNA Double-Strand Break Repair
- centriole replication
- gamete generation
- PPARA activates gene expression
- organelle fission
- EGF/EGFR signaling pathway
- Toll-like Receptor Cascades

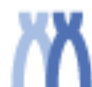

created by  
<http://metascape.org>
