# Supplementary material for: Transcriptional profiling of Hutchinson-Gilford Progeria syndrome fibroblasts reveals deficits in mesenchymal stem cell commitment to differentiation related to early events in endochondral ossification
Source: eLife journal article supplement (doi:10.7554/elife.81290), 2022-12-29
Supplement: table1-data1 [file elife-81290-table1-data1-v2.zip]

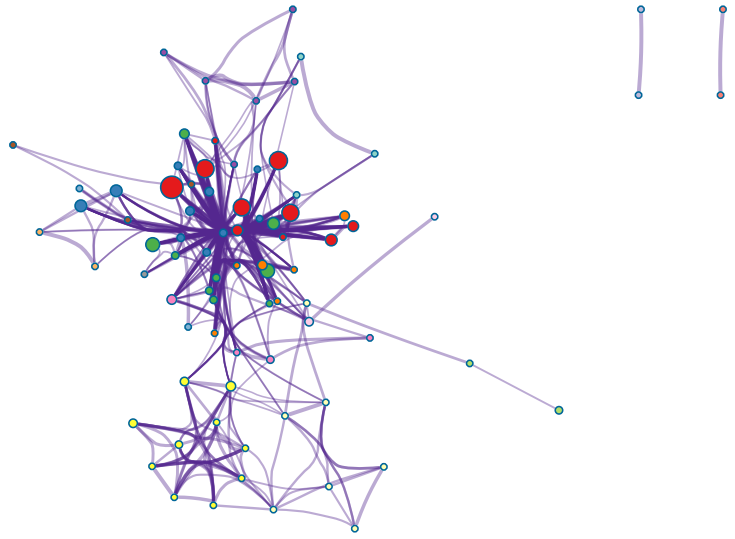

- mitotic cell cycle process
- Polo-like kinase mediated events
- nuclear division
- PID AURORA B PATHWAY
- establishment of organelle localization
- negative regulation of organelle organization
- Retinoblastoma gene in cancer
- positive regulation of transferase activity
- regulation of meiotic cell cycle
- HTLV-I infection
- Calcium regulation in cardiac cells
- sensory perception of sound
- Melanogenesis
- peptidyl-tyrosine dephosphorylation
- G1/S transition of mitotic cell cycle
- DNA repair
- regulation of proteolysis
