# Supplementary material for: Transcriptional profiling of Hutchinson-Gilford Progeria syndrome fibroblasts reveals deficits in mesenchymal stem cell commitment to differentiation related to early events in endochondral ossification
Source: eLife journal article supplement (doi:10.7554/elife.81290), 2022-12-29
Supplement: table1-data1 [file elife-81290-table1-data1-v2.zip]

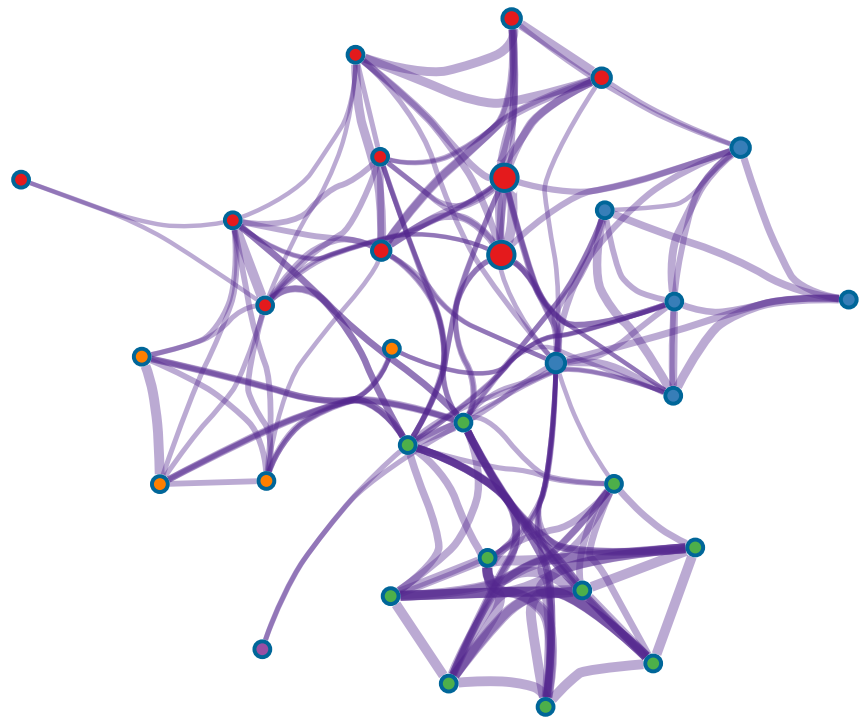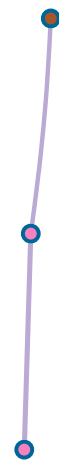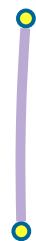

- regulation of MAPK cascade
- fat cell differentiation
- regulation of muscle system process
- thyroid hormone signaling pathway
- regulation of G protein-coupled receptor signaling pa
- NOD-like receptor signaling pathway
- transmembrane receptor protein serine/threonine kin.
- anterior/posterior pattern specification

 created by  
<http://metascape.org>
