# Supplementary material for: Transcriptional profiling of Hutchinson-Gilford Progeria syndrome fibroblasts reveals deficits in mesenchymal stem cell commitment to differentiation related to early events in endochondral ossification
Source: eLife journal article supplement (doi:10.7554/elife.81290), 2022-12-29
Supplement: table1-data1 [file elife-81290-table1-data1-v2.zip]

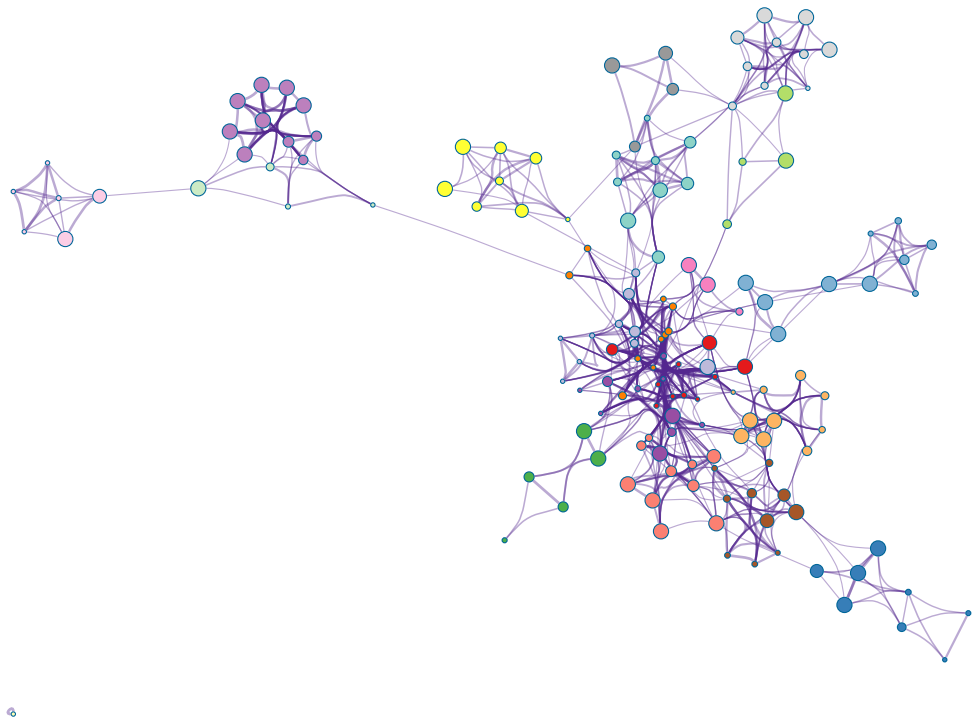

- EGF/EGFR signaling pathway
- extracellular matrix organization
- cell projection assembly
- lamellipodium organization
- PID ANGIOPOIETIN RECEPTOR PATHWAY
- lipid biosynthetic process
- negative regulation of cell-matrix adhesion
- Signaling by Interleukins
- localization within membrane
- Platelet activation, signaling and aggregation
- blood vessel maturation
- Rap1 signaling pathway
- supramolecular fiber organization
- cellular response to hormone stimulus
- positive regulation of locomotion
- endocytosis
- lipid localization
- negative regulation of transport
- ion homeostasis
- Transport of small molecules
