# Supplementary material for: Transcriptional profiling of Hutchinson-Gilford Progeria syndrome fibroblasts reveals deficits in mesenchymal stem cell commitment to differentiation related to early events in endochondral ossification
Source: eLife journal article supplement (doi:10.7554/elife.81290), 2022-12-29
Supplement: table1-data1 [file elife-81290-table1-data1-v2.zip]

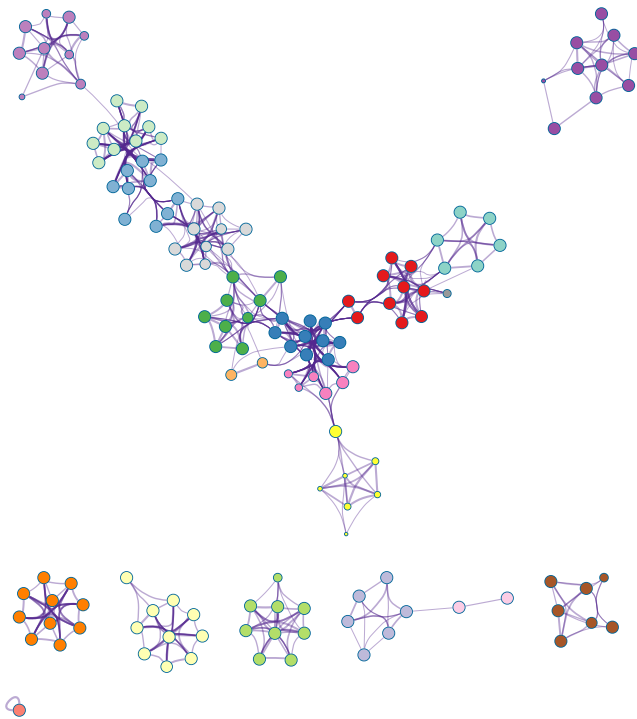

- Cellular responses to stress
- HDACs deacetylate histones
- Deubiquitination
- mitochondrion organization
- Respiratory electron transport, ATP synthesis by cher
- regulation of gene silencing
- myeloid cell differentiation
- Effect of progerin on genes involved in Hutchinson-G
- TRBP containing complex (DICER, RPL7A, EIF6, MO
- ribonucleoprotein complex biogenesis
- muscle structure development
- apoptotic signaling pathway
- VEGFA-VEGFR2 signaling pathway
- Neddylation
- E3 ubiquitin ligases ubiquitinate target proteins
- Wnt signaling pathway
- regulation of cellular response to stress
- CLEC7A (Dectin-1) signaling
- IL-17 signaling pathway
- regulation of protein catabolic process
