# Supplementary material for: Transcriptional profiling of Hutchinson-Gilford Progeria syndrome fibroblasts reveals deficits in mesenchymal stem cell commitment to differentiation related to early events in endochondral ossification
Source: eLife journal article supplement (doi:10.7554/elife.81290), 2022-12-29
Supplement: table1-data1 [file elife-81290-table1-data1-v2.zip]

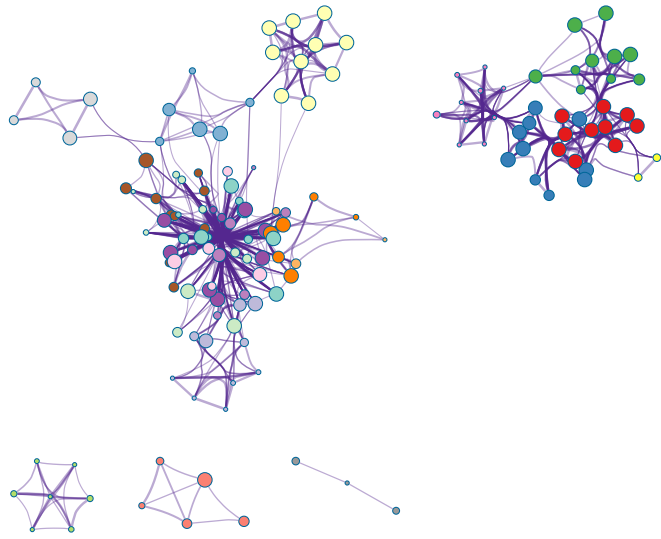

- HDACs deacetylate histones
- negative regulation of gene expression, epigenetic
- regulation of gene silencing
- tissue morphogenesis
- brain development
- E3 ubiquitin ligases ubiquitinate target proteins
- Pathways in cancer
- Formation of Senescence-Associated Heterochromat
- Genotoxicity pathway
- sensory organ development
- cell projection morphogenesis
- skin development
- regulation of cellular protein localization
- developmental growth
- neural precursor cell proliferation
- Amyotrophic lateral sclerosis (ALS)
- ossification
- regulation of neuron death
- Neural crest differentiation
- response to growth factor
