# Supplementary material for: Transcriptional profiling of Hutchinson-Gilford Progeria syndrome fibroblasts reveals deficits in mesenchymal stem cell commitment to differentiation related to early events in endochondral ossification
Source: eLife journal article supplement (doi:10.7554/elife.81290), 2022-12-29
Supplement: table1-data1 [file elife-81290-table1-data1-v2.zip]

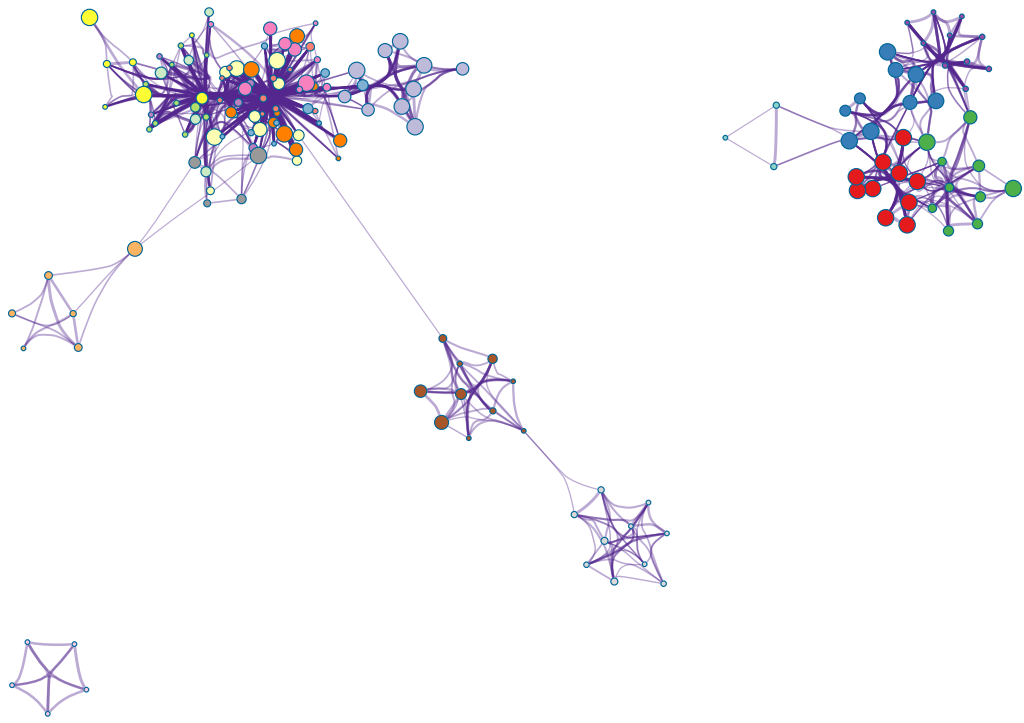

- HDACs deacetylate histones
- negative regulation of gene expression, epigenetic
- regulation of gene silencing
- Formation of Senescence-Associated Heterochromat
- tissue morphogenesis
- response to growth factor
- regulation of small GTPase mediated signal transduc
- sensory organ development
- regulation of cell adhesion
- E3 ubiquitin ligases ubiquitinate target proteins
- blood vessel morphogenesis
- cell morphogenesis involved in differentiation
- outflow tract morphogenesis
- mesenchyme development
- transmembrane receptor protein tyrosine kinase sign.
- Hair follicle development: cytodifferentiation - part 3 o
- negative regulation of chemokine-mediated signaling
- Adrenergic signaling in cardiomyocytes
- inner ear development
- epithelial cell proliferation
