# Supplementary material for: Transcriptional profiling of Hutchinson-Gilford Progeria syndrome fibroblasts reveals deficits in mesenchymal stem cell commitment to differentiation related to early events in endochondral ossification
Source: eLife journal article supplement (doi:10.7554/elife.81290), 2022-12-29
Supplement: table1-data1 [file elife-81290-table1-data1-v2.zip]

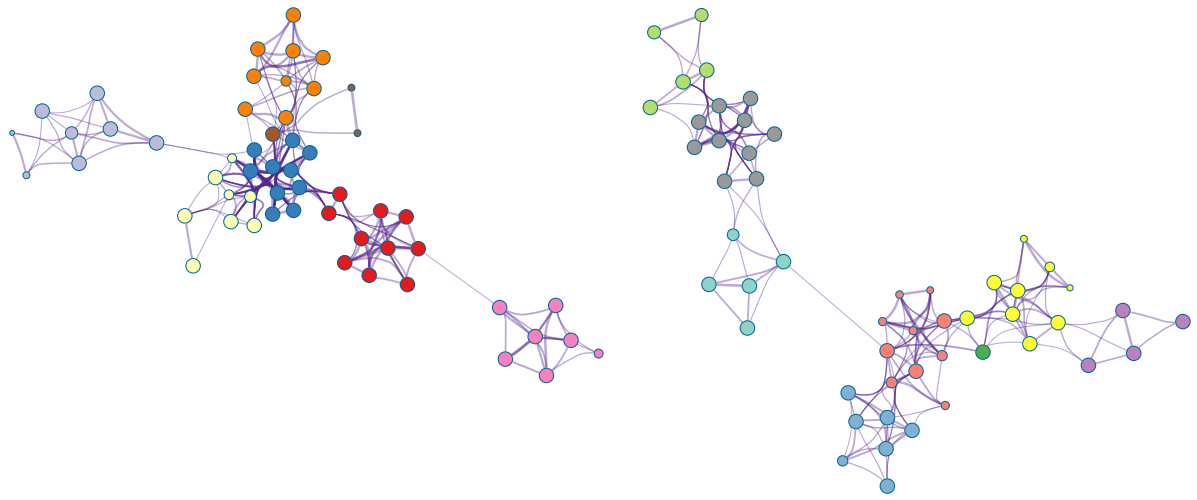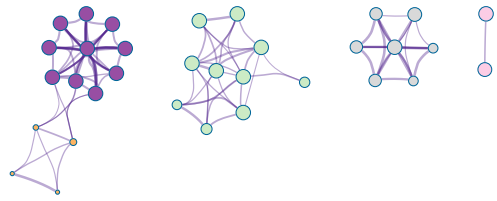

- Cellular responses to stress
- HDACs deacetylate histones
- mitochondrion organization
- ATP metabolic process
- Deubiquitination
- mitochondrial transport
- regulation of gene silencing
- ncRNA metabolic process
- proteolysis involved in cellular protein catabolic process
- autophagy
- Effect of progerin on genes involved in Hutchinson-G
- regulation of myeloid cell differentiation
- mitochondrial membrane organization
- apoptotic signaling pathway
- Respiratory chain complex I (lambda subunit) mitochondrion
- Antigen processing: Ubiquitination & Proteasome degradation
- Transcriptional Regulation by TP53
- sulfur compound metabolic process
- localization within membrane
- regulation of growth
