# Supplementary material for: Transcriptional profiling of Hutchinson-Gilford Progeria syndrome fibroblasts reveals deficits in mesenchymal stem cell commitment to differentiation related to early events in endochondral ossification
Source: eLife journal article supplement (doi:10.7554/elife.81290), 2022-12-29
Supplement: table1-data1 [file elife-81290-table1-data1-v2.zip]

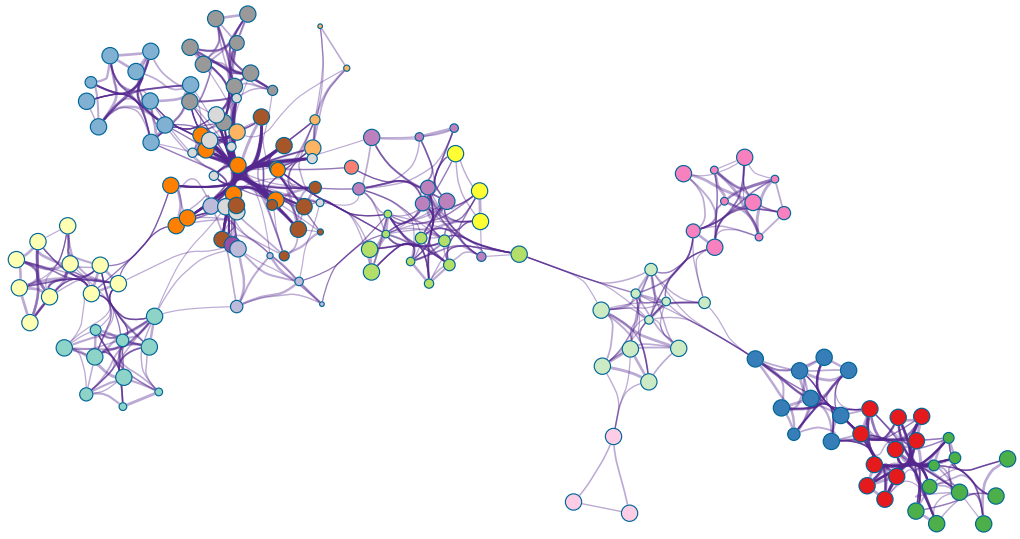

- HDACs deacetylate histones
- Ub-specific processing proteases
- regulation of gene silencing
- negative regulation of cell differentiation
- tissue morphogenesis
- Pathways in cancer
- sensory organ development
- Nervous system development
- muscle structure development
- brain development
- cellular component morphogenesis
- skeletal system development
- Neural crest differentiation
- ameboidal-type cell migration
- ossification
- Hippo signaling pathway
- transmembrane receptor protein tyrosine kinase sign.
- stem cell differentiation
- Breast cancer
- MAPK family signaling cascades

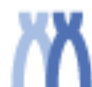

created by  
<http://metascape.org>
