# Supplementary material for: Transcriptional profiling of Hutchinson-Gilford Progeria syndrome fibroblasts reveals deficits in mesenchymal stem cell commitment to differentiation related to early events in endochondral ossification
Source: eLife journal article supplement (doi:10.7554/elife.81290), 2022-12-29
Supplement: table1-data1 [file elife-81290-table1-data1-v2.zip]

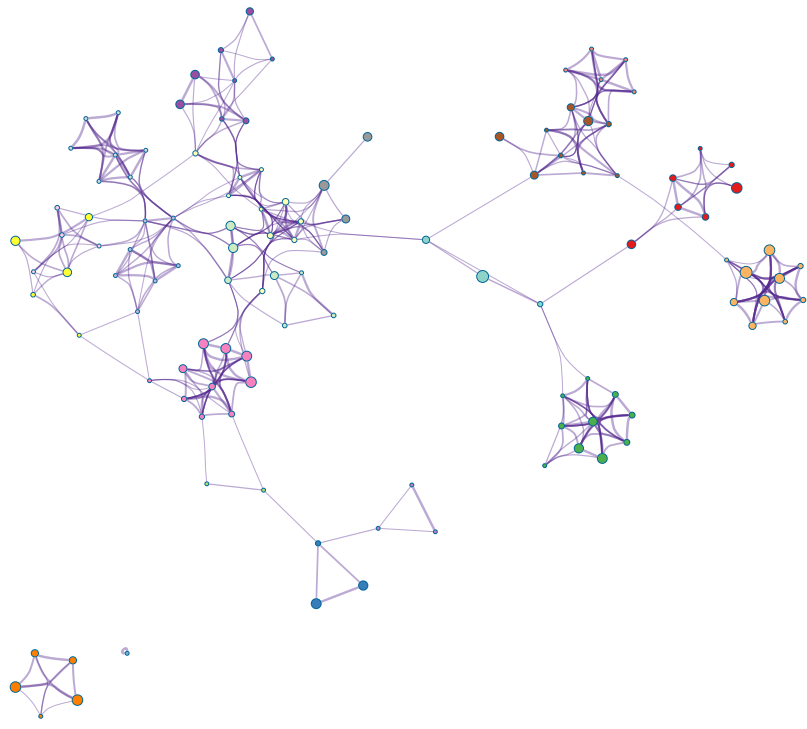

- Extracellular matrix organization
- Interleukin-4 and Interleukin-13 signaling
- transmembrane receptor protein serine/threonine kin.
- peptidyl-tyrosine phosphorylation
- plasma membrane bounded cell projection assembly
- pattern specification process
- negative regulation of immunoglobulin production
- positive regulation of cellular component movement
- organic hydroxy compound metabolic process
- NABA MATRISOME ASSOCIATED
- regulation of cellular carbohydrate metabolic process
- amyloid precursor protein catabolic process
- macrophage cytokine production
- epithelial cell-cell adhesion
- positive regulation of cytosolic calcium ion concentrat
- trabecula morphogenesis
- formation of primary germ layer
- Hypertrophic cardiomyopathy (HCM)
- Histidine metabolism
- cellular response to ketone
