# Supplementary material for: Transcriptional profiling of Hutchinson-Gilford Progeria syndrome fibroblasts reveals deficits in mesenchymal stem cell commitment to differentiation related to early events in endochondral ossification
Source: eLife journal article supplement (doi:10.7554/elife.81290), 2022-12-29
Supplement: table1-data1 [file metascape_result.xlsx]

## Sheet: Annotation
MyList	Gene ID	Type	Tax ID	Homologene Gene ID	Homologene Gene Tax ID	Gene Symbol	Description	Biological Process (GO)	Kinase Class (UniProt)	Protein Function (Protein Atlas)	Subcellular Location (Protein Atlas)	Drug (DrugBank)	Canonical Pathways	Hallmark Gene Sets	GO:0016071 mRNA metabolic process	GO:0006974 cellular response to DNA damag	WP4536 Genes related to primary ciliu	GO:0051301 cell division	GO:1903311 regulation of mRNA metabolic p	GO:0016570 histone modification	GO:0006913 nucleocytoplasmic transport	GO:0010638 positive regulation of organel	GO:0006402 mRNA catabolic process	GO:0043414 macromolecule methylation	GO:0051603 proteolysis involved in cellul	GO:0000226 microtubule cytoskeleton organ	GO:0051028 mRNA transport	R-HSA-5693532 DNA Double-Strand Break Repair	GO:0007099 centriole replication	GO:0007276 gamete generation	R-HSA-1989781 PPARA activates gene expressio	GO:0048285 organelle fission	WP437 EGF/EGFR signaling pathway	R-HSA-168898 Toll-like Receptor Cascades
SERPING1	710	symbol	H. sapiens	710	H. sapiens	SERPING1	serpin family G member 1	GO:0001868 regulation of complement activation, lectin pathway;GO:0001869 negative regulation of complement activation, lectin pathway;GO:0001867 complement activation, lectin pathway		Predicted secreted proteins; Predicted intracellular proteins; Candidate cardiovascular disease genes; Disease related genes		PPL-100; Copper	(M3468)NABA ECM REGULATORS; (M5885)NABA MATRISOME ASSOCIATED; (M5889)NABA MATRISOME	(M5946)HALLMARK COAGULATION; (M5913)HALLMARK INTERFERON GAMMA RESPONSE; (M5921)HALLMARK COMPLEMENT	0.0	0.0	0.0	0.0	0.0	0.0	0.0	0.0	0.0	0.0	0.0	0.0	0.0	0.0	0.0	0.0	0.0	0.0	0.0	1.0
C11orf30	56946	gene_synonym	H. sapiens	56946	H. sapiens	EMSY	EMSY transcriptional repressor, BRCA2 interacting	GO:0006325 chromatin organization;GO:0006281 DNA repair;GO:0006974 cellular response to DNA damage stimulus		Predicted intracellular proteins	Nucleoplasm (Supported)				0.0	1.0	0.0	0.0	0.0	0.0	0.0	0.0	0.0	0.0	0.0	0.0	0.0	0.0	0.0	0.0	0.0	0.0	0.0	0.0
MED14	9282	symbol	H. sapiens	9282	H. sapiens	MED14	mediator complex subunit 14	GO:0060261 positive regulation of transcription initiation from RNA polymerase II promoter;GO:2000144 positive regulation of DNA-templated transcription, initiation;GO:0060260 regulation of transcription initiation from RNA polymerase II promoter		Predicted intracellular proteins	Nucleoplasm (Approved)				0.0	0.0	0.0	0.0	0.0	0.0	0.0	0.0	0.0	0.0	0.0	0.0	0.0	0.0	0.0	0.0	1.0	0.0	0.0	0.0
LOC102724009	102724009	Gene_ID	H. sapiens	102724009	H. sapiens	KIF1C-AS1	KIF1C antisense RNA 1								0.0	0.0	0.0	0.0	0.0	0.0	0.0	0.0	0.0	0.0	0.0	0.0	0.0	0.0	0.0	0.0	0.0	0.0	0.0	0.0
HP1BP3	50809	symbol	H. sapiens	50809	H. sapiens	HP1BP3	heterochromatin protein 1 binding protein 3	GO:0097298 regulation of nucleus size;GO:0070828 heterochromatin organization;GO:0006334 nucleosome assembly		Predicted intracellular proteins	Nuclear speckles (Supported)	Artenimol			0.0	0.0	0.0	0.0	0.0	0.0	0.0	0.0	0.0	0.0	0.0	0.0	0.0	1.0	0.0	0.0	0.0	0.0	0.0	0.0
NKTR	4820	symbol	H. sapiens	4820	H. sapiens	NKTR	natural killer cell triggering receptor	GO:0000413 protein peptidyl-prolyl isomerization;GO:0018208 peptidyl-proline modification;GO:0006457 protein folding		Predicted intracellular proteins; ENZYME proteins:Isomerase; Enzymes	Cytosol;Nucleoplasm;Plasma membrane (Supported)				0.0	0.0	0.0	0.0	0.0	0.0	0.0	0.0	0.0	0.0	0.0	0.0	0.0	0.0	0.0	0.0	0.0	0.0	0.0	0.0
PIAS1	8554	symbol	H. sapiens	8554	H. sapiens	PIAS1	protein inhibitor of activated STAT 1	GO:0033235 positive regulation of protein sumoylation;GO:0051152 positive regulation of smooth muscle cell differentiation;GO:0033233 regulation of protein sumoylation		Predicted intracellular proteins	Microtubules (Approved)		(M140)PID RANBP2 PATHWAY; (M161)PID IFNG PATHWAY; (M91)PID TCPTP PATHWAY	(M5908)HALLMARK ANDROGEN RESPONSE	0.0	1.0	0.0	0.0	0.0	1.0	0.0	0.0	1.0	0.0	1.0	0.0	0.0	0.0	0.0	1.0	0.0	0.0	0.0	1.0
PPP1R21	129285	symbol	H. sapiens	129285	H. sapiens	PPP1R21	protein phosphatase 1 regulatory subunit 21			Predicted intracellular proteins	Vesicles (Approved); Additional: Nucleoplasm				0.0	0.0	0.0	0.0	0.0	0.0	0.0	0.0	0.0	0.0	0.0	0.0	0.0	0.0	0.0	0.0	0.0	0.0	0.0	0.0
MED1	5469	symbol	H. sapiens	5469	H. sapiens	MED1	mediator complex subunit 1	GO:0048822 enucleate erythrocyte development;GO:0060751 branch elongation involved in mammary gland duct branching;GO:0042695 thelarche		Predicted intracellular proteins; Cancer-related genes:Candidate cancer biomarkers	Nucleoplasm (Supported)	Becocalcidiol	(M162)PID RXR VDR PATHWAY; (M58)PID AR PATHWAY; (M200)PID ERA GENOMIC PATHWAY		1.0	0.0	1.0	0.0	0.0	0.0	1.0	0.0	0.0	0.0	0.0	0.0	0.0	0.0	0.0	0.0	1.0	0.0	0.0	0.0
THOC2	57187	symbol	H. sapiens	57187	H. sapiens	THOC2	THO complex 2	GO:0046784 viral mRNA export from host cell nucleus;GO:0044417 translocation of molecules into host;GO:0016973 poly(A)+ mRNA export from nucleus		Predicted intracellular proteins; Disease related genes	Nucleoplasm (Approved)				1.0	0.0	0.0	0.0	0.0	0.0	1.0	0.0	0.0	0.0	0.0	0.0	1.0	0.0	0.0	0.0	0.0	0.0	0.0	0.0
ZNF514	84874	symbol	H. sapiens	84874	H. sapiens	ZNF514	zinc finger protein 514	GO:0006357 regulation of transcription by RNA polymerase II;GO:0006366 transcription by RNA polymerase II;GO:0006355 regulation of transcription, DNA-templated		Transcription factors:Zinc-coordinating DNA-binding domains; Predicted intracellular proteins	Nuclear bodies;Nucleoplasm (Approved)				0.0	0.0	0.0	0.0	0.0	0.0	0.0	0.0	0.0	0.0	0.0	0.0	0.0	0.0	0.0	0.0	0.0	0.0	0.0	0.0
BRD8	10902	symbol	H. sapiens	10902	H. sapiens	BRD8	bromodomain containing 8	GO:0043968 histone H2A acetylation;GO:0097067 cellular response to thyroid hormone stimulus;GO:0097066 response to thyroid hormone		Predicted intracellular proteins	Nucleoplasm (Supported); Additional: Mitochondria				0.0	0.0	0.0	0.0	0.0	1.0	0.0	0.0	0.0	0.0	0.0	0.0	0.0	0.0	0.0	0.0	0.0	0.0	0.0	0.0
SON	6651	symbol	H. sapiens	6651	H. sapiens	SON	SON DNA and RNA binding protein	GO:0000281 mitotic cytokinesis;GO:0061640 cytoskeleton-dependent cytokinesis;GO:0048024 regulation of mRNA splicing, via spliceosome		Transporters:Primary Active Transporters; Potential drug targets; Disease related genes; Predicted intracellular proteins	Nuclear speckles (Enhanced)				1.0	0.0	0.0	1.0	1.0	0.0	0.0	0.0	0.0	0.0	0.0	1.0	0.0	0.0	0.0	0.0	0.0	0.0	0.0	0.0
AP2B1	163	symbol	H. sapiens	163	H. sapiens	AP2B1	adaptor related protein complex 2 subunit beta 1	GO:0098884 postsynaptic neurotransmitter receptor internalization;GO:0140239 postsynaptic endocytosis;GO:0048268 clathrin coat assembly		Predicted intracellular proteins; Cancer-related genes:Candidate cancer biomarkers	Vesicles (Supported)			(M5910)HALLMARK PROTEIN SECRETION	0.0	0.0	0.0	0.0	0.0	0.0	1.0	0.0	0.0	0.0	0.0	0.0	1.0	0.0	0.0	0.0	0.0	0.0	1.0	0.0
FAM120B	84498	symbol	H. sapiens	84498	H. sapiens	FAM120B	family with sequence similarity 120B	GO:0035357 peroxisome proliferator activated receptor signaling pathway;GO:0045444 fat cell differentiation;GO:0030522 intracellular receptor signaling pathway		Predicted intracellular proteins	Nucleoplasm (Approved); Additional: Cytosol		(M162)PID RXR VDR PATHWAY		0.0	0.0	0.0	0.0	0.0	0.0	0.0	0.0	0.0	0.0	0.0	0.0	0.0	0.0	0.0	0.0	1.0	0.0	0.0	0.0
TGOLN2	10618	symbol	H. sapiens	10618	H. sapiens	TGOLN2	trans-golgi network protein 2				Golgi apparatus (Enhanced); Additional: Nucleoplasm				0.0	0.0	0.0	0.0	0.0	0.0	0.0	0.0	0.0	0.0	0.0	0.0	0.0	0.0	0.0	0.0	0.0	0.0	0.0	0.0
C10orf76	79591	gene_synonym	H. sapiens	79591	H. sapiens	ARMH3	armadillo like helical domain containing 3	GO:1903358 regulation of Golgi organization;GO:0007030 Golgi organization;GO:0010256 endomembrane system organization		Predicted intracellular proteins	Vesicles (Approved)				0.0	0.0	0.0	0.0	0.0	0.0	0.0	0.0	0.0	0.0	0.0	0.0	0.0	0.0	0.0	0.0	0.0	0.0	0.0	0.0
EIF4G2	1982	symbol	H. sapiens	1982	H. sapiens	EIF4G2	eukaryotic translation initiation factor 4 gamma 2	GO:0060999 positive regulation of dendritic spine development;GO:0045773 positive regulation of axon extension;GO:0060998 regulation of dendritic spine development		Predicted intracellular proteins	Cytosol (Enhanced)			(M5926)HALLMARK MYC TARGETS V1	0.0	0.0	0.0	0.0	0.0	0.0	0.0	0.0	1.0	0.0	0.0	0.0	1.0	0.0	0.0	0.0	0.0	0.0	0.0	1.0
ZC3H7A	29066	symbol	H. sapiens	29066	H. sapiens	ZC3H7A	zinc finger CCCH-type containing 7A	GO:0035196 production of miRNAs involved in gene silencing by miRNA;GO:0031050 dsRNA processing;GO:0070918 production of small RNA involved in gene silencing by RNA		Predicted intracellular proteins	Cytosol (Supported)				0.0	0.0	0.0	0.0	0.0	0.0	0.0	0.0	0.0	0.0	0.0	0.0	0.0	0.0	0.0	0.0	0.0	0.0	0.0	0.0
HMGXB4	10042	symbol	H. sapiens	10042	H. sapiens	HMGXB4	HMG-box containing 4	GO:0008333 endosome to lysosome transport;GO:0007041 lysosomal transport;GO:0007034 vacuolar transport		Cancer-related genes:Mutational cancer driver genes; Predicted intracellular proteins; Transcription factors:Other all-alpha-helical DNA-binding domains	Nucleoplasm (Approved)				0.0	0.0	0.0	0.0	0.0	0.0	0.0	0.0	0.0	0.0	0.0	0.0	0.0	0.0	0.0	0.0	0.0	0.0	0.0	0.0
NCOA6	23054	symbol	H. sapiens	23054	H. sapiens	NCOA6	nuclear receptor coactivator 6	GO:0006352 DNA-templated transcription, initiation;GO:0030099 myeloid cell differentiation;GO:0007507 heart development		Predicted intracellular proteins	Nucleoplasm (Supported)		(M58)PID AR PATHWAY	(M5916)HALLMARK APICAL SURFACE	0.0	1.0	1.0	0.0	0.0	0.0	0.0	0.0	0.0	0.0	0.0	0.0	0.0	0.0	0.0	0.0	1.0	0.0	0.0	0.0
NINJ2	4815	symbol	H. sapiens	4815	H. sapiens	NINJ2	ninjurin 2	GO:0007158 neuron cell-cell adhesion;GO:0042246 tissue regeneration;GO:0031099 regeneration			Endoplasmic reticulum (Approved); Additional: Centriolar satellite;Cytosol;Nucleoplasm;Plasma membrane				0.0	0.0	0.0	0.0	0.0	0.0	0.0	0.0	0.0	0.0	0.0	0.0	0.0	0.0	0.0	0.0	0.0	0.0	0.0	0.0
NUP37	79023	symbol	H. sapiens	79023	H. sapiens	NUP37	nucleoporin 37	GO:0051028 mRNA transport;GO:0050657 nucleic acid transport;GO:0050658 RNA transport		Predicted intracellular proteins; Transporters:Transporter channels and pores	Nucleoplasm (Approved)				1.0	0.0	0.0	1.0	0.0	0.0	0.0	0.0	0.0	0.0	0.0	0.0	1.0	0.0	0.0	0.0	0.0	1.0	0.0	1.0
SYNRG	11276	symbol	H. sapiens	11276	H. sapiens	SYNRG	synergin gamma	GO:0006897 endocytosis;GO:0006886 intracellular protein transport;GO:0046907 intracellular transport		Predicted intracellular proteins	Cytosol (Approved)				0.0	0.0	0.0	0.0	0.0	0.0	0.0	0.0	0.0	0.0	0.0	0.0	0.0	0.0	0.0	0.0	0.0	0.0	0.0	0.0
XRN2	22803	symbol	H. sapiens	22803	H. sapiens	XRN2	5'-3' exoribonuclease 2	GO:0000738 DNA catabolic process, exonucleolytic;GO:0006353 DNA-templated transcription, termination;GO:0006308 DNA catabolic process		Predicted intracellular proteins	Nucleoli (Enhanced); Additional: Nucleoplasm				1.0	0.0	0.0	0.0	0.0	0.0	0.0	0.0	1.0	0.0	0.0	0.0	0.0	0.0	0.0	1.0	0.0	0.0	0.0	0.0
TUG1	55000	symbol	H. sapiens	55000	H. sapiens	TUG1	taurine up-regulated 1	GO:0042478 regulation of eye photoreceptor cell development;GO:0046532 regulation of photoreceptor cell differentiation;GO:0042462 eye photoreceptor cell development							0.0	0.0	0.0	0.0	0.0	0.0	0.0	0.0	0.0	0.0	0.0	0.0	0.0	0.0	0.0	0.0	0.0	0.0	0.0	0.0
IPO8	10526	symbol	H. sapiens	10526	H. sapiens	IPO8	importin 8	GO:0006606 protein import into nucleus;GO:0051170 import into nucleus;GO:0017038 protein import		Predicted intracellular proteins; Transporters:Transporter channels and pores	Nucleoplasm (Approved)				0.0	0.0	0.0	0.0	0.0	0.0	1.0	0.0	0.0	0.0	0.0	0.0	0.0	0.0	0.0	0.0	0.0	0.0	0.0	0.0
SEPP1	6414	gene_synonym	H. sapiens	6414	H. sapiens	SELENOP	selenoprotein P	GO:0001887 selenium compound metabolic process;GO:0009791 post-embryonic development;GO:0007626 locomotory behavior		Predicted secreted proteins	Golgi apparatus;Nucleoplasm (Uncertain)	Zinc; Zinc acetate; Zinc chloride; Zinc sulfate, unspecified form		(M5908)HALLMARK ANDROGEN RESPONSE; (M5956)HALLMARK KRAS SIGNALING DN	0.0	0.0	0.0	0.0	0.0	0.0	0.0	0.0	0.0	0.0	0.0	0.0	0.0	0.0	0.0	0.0	0.0	0.0	0.0	0.0
PAQR5	54852	symbol	H. sapiens	54852	H. sapiens	PAQR5	progestin and adipoQ receptor family member 5	GO:0048477 oogenesis;GO:0007292 female gamete generation;GO:0007281 germ cell development			Vesicles (Approved)				0.0	0.0	0.0	0.0	0.0	0.0	0.0	0.0	0.0	0.0	0.0	0.0	0.0	0.0	0.0	1.0	0.0	0.0	0.0	0.0
ZNF207	7756	symbol	H. sapiens	7756	H. sapiens	ZNF207	zinc finger protein 207	GO:0008608 attachment of spindle microtubules to kinetochore;GO:0007094 mitotic spindle assembly checkpoint signaling;GO:0071173 spindle assembly checkpoint signaling		Predicted intracellular proteins	Nucleoplasm (Enhanced)				1.0	0.0	0.0	1.0	0.0	0.0	0.0	0.0	0.0	0.0	0.0	1.0	0.0	1.0	1.0	0.0	0.0	1.0	0.0	0.0
TDRD7	23424	symbol	H. sapiens	23424	H. sapiens	TDRD7	tudor domain containing 7	GO:0002089 lens morphogenesis in camera-type eye;GO:0070306 lens fiber cell differentiation;GO:0002088 lens development in camera-type eye		Predicted intracellular proteins; Disease related genes	Cytoplasmic bodies (Supported); Additional: Nucleoplasm		(M242)PID AURORA A PATHWAY	(M5911)HALLMARK INTERFERON ALPHA RESPONSE; (M5913)HALLMARK INTERFERON GAMMA RESPONSE	0.0	0.0	0.0	0.0	0.0	0.0	0.0	0.0	0.0	0.0	0.0	0.0	0.0	0.0	0.0	1.0	0.0	0.0	0.0	0.0
CHD1L	9557	symbol	H. sapiens	9557	H. sapiens	CHD1L	chromodomain helicase DNA binding protein 1 like	GO:0032508 DNA duplex unwinding;GO:0032392 DNA geometric change;GO:0006338 chromatin remodeling		Predicted intracellular proteins; Enzymes; ENZYME proteins:Hydrolases	Nucleoplasm (Supported)				0.0	1.0	0.0	0.0	0.0	0.0	0.0	0.0	0.0	0.0	0.0	0.0	0.0	1.0	0.0	0.0	0.0	0.0	0.0	0.0
CETN3	1070	symbol	H. sapiens	1070	H. sapiens	CETN3	centrin 3	GO:0051028 mRNA transport;GO:0007098 centrosome cycle;GO:0031023 microtubule organizing center organization		Predicted intracellular proteins	Centrosome (Supported)				0.0	0.0	0.0	1.0	0.0	0.0	0.0	0.0	0.0	0.0	0.0	1.0	1.0	0.0	1.0	0.0	0.0	0.0	0.0	0.0
RBBP6	5930	symbol	H. sapiens	5930	H. sapiens	RBBP6	RB binding protein 6, ubiquitin ligase	GO:0061053 somite development;GO:0006275 regulation of DNA replication;GO:0035264 multicellular organism growth		Predicted intracellular proteins; Enzymes; ENZYME proteins:Transferases	Nuclear speckles (Enhanced)				1.0	1.0	0.0	0.0	0.0	0.0	0.0	0.0	0.0	0.0	1.0	0.0	0.0	0.0	0.0	0.0	0.0	0.0	0.0	0.0
ABI1	10006	symbol	H. sapiens	10006	H. sapiens	ABI1	abl interactor 1	GO:0072673 lamellipodium morphogenesis;GO:0035855 megakaryocyte development;GO:0098751 bone cell development		Predicted intracellular proteins; Disease related genes; Cancer-related genes	Plasma membrane (Approved)		(M277)PID INTEGRIN A4B1 PATHWAY; (M241)PID RAC1 REG PATHWAY; (M156)PID ECADHERIN NASCENT AJ PATHWAY	(M5893)HALLMARK MITOTIC SPINDLE; (M5932)HALLMARK INFLAMMATORY RESPONSE; (M5950)HALLMARK ALLOGRAFT REJECTION	0.0	0.0	0.0	0.0	0.0	0.0	0.0	0.0	0.0	0.0	0.0	0.0	0.0	0.0	0.0	0.0	0.0	0.0	1.0	1.0
TAB2	23118	symbol	H. sapiens	23118	H. sapiens	TAB2	TGF-beta activated kinase 1 (MAP3K7) binding protein 2	GO:0010507 negative regulation of autophagy;GO:0043123 positive regulation of I-kappaB kinase/NF-kappaB signaling;GO:0043122 regulation of I-kappaB kinase/NF-kappaB signaling		Predicted intracellular proteins; Disease related genes			(M20)PID P38 MKK3 6PATHWAY; (M23)PID WNT NONCANONICAL PATHWAY; (M110)PID IL1 PATHWAY		0.0	0.0	0.0	0.0	0.0	0.0	0.0	0.0	0.0	0.0	0.0	0.0	0.0	0.0	0.0	0.0	0.0	0.0	1.0	1.0
RNPC3	55599	symbol	H. sapiens	55599	H. sapiens	RNPC3	RNA binding region (RNP1, RRM) containing 3	GO:0000377 RNA splicing, via transesterification reactions with bulged adenosine as nucleophile;GO:0000398 mRNA splicing, via spliceosome;GO:0000375 RNA splicing, via transesterification reactions		Predicted intracellular proteins	Nucleoplasm (Supported)				1.0	0.0	0.0	0.0	0.0	0.0	0.0	0.0	0.0	0.0	0.0	0.0	0.0	0.0	0.0	0.0	0.0	0.0	0.0	0.0
XPO7	23039	symbol	H. sapiens	23039	H. sapiens	XPO7	exportin 7	GO:0006611 protein export from nucleus;GO:0051168 nuclear export;GO:0006913 nucleocytoplasmic transport		Predicted intracellular proteins; Transporters:Transporter channels and pores				(M5945)HALLMARK HEME METABOLISM	0.0	0.0	0.0	0.0	0.0	0.0	1.0	0.0	0.0	0.0	0.0	0.0	1.0	0.0	0.0	0.0	0.0	0.0	0.0	0.0
TMBIM6	7009	symbol	H. sapiens	7009	H. sapiens	TMBIM6	transmembrane BAX inhibitor motif containing 6	GO:0060701 negative regulation of ribonuclease activity;GO:0060702 negative regulation of endoribonuclease activity;GO:0060699 regulation of endoribonuclease activity		Predicted intracellular proteins; Transporters:Transporter channels and pores				(M5941)HALLMARK UV RESPONSE UP; (M5934)HALLMARK XENOBIOTIC METABOLISM	1.0	0.0	0.0	0.0	0.0	0.0	0.0	0.0	0.0	0.0	0.0	0.0	0.0	0.0	0.0	0.0	0.0	0.0	0.0	0.0
CBLL1	79872	symbol	H. sapiens	79872	H. sapiens	CBLL1	Cbl proto-oncogene like 1	GO:0080009 mRNA methylation;GO:0016556 mRNA modification;GO:0001510 RNA methylation		Predicted intracellular proteins; Enzymes; ENZYME proteins:Transferases	Nuclear speckles (Supported)		(M142)PID AJDISS 2PATHWAY		1.0	0.0	0.0	0.0	0.0	0.0	0.0	0.0	0.0	1.0	0.0	0.0	0.0	0.0	0.0	0.0	0.0	0.0	0.0	0.0
FASTKD3	79072	symbol	H. sapiens	79072	H. sapiens	FASTKD3	FAST kinase domains 3	GO:0044528 regulation of mitochondrial mRNA stability;GO:0070131 positive regulation of mitochondrial translation;GO:0000963 mitochondrial RNA processing		Predicted intracellular proteins	Mitochondria;Nucleoplasm (Supported)				1.0	0.0	0.0	0.0	1.0	0.0	0.0	0.0	1.0	0.0	0.0	0.0	0.0	0.0	0.0	0.0	0.0	0.0	0.0	0.0
SEC24B	10427	symbol	H. sapiens	10427	H. sapiens	SEC24B	SEC24 homolog B, COPII coat complex component	GO:1901301 regulation of cargo loading into COPII-coated vesicle;GO:0021747 cochlear nucleus development;GO:0061156 pulmonary artery morphogenesis		Predicted intracellular proteins	Nucleoplasm;Vesicles (Approved)				0.0	0.0	0.0	0.0	0.0	0.0	1.0	0.0	0.0	0.0	0.0	0.0	0.0	0.0	0.0	0.0	0.0	0.0	0.0	0.0
LZIC	84328	symbol	H. sapiens	84328	H. sapiens	LZIC	leucine zipper and CTNNBIP1 domain containing	GO:0010212 response to ionizing radiation;GO:0009314 response to radiation;GO:0009628 response to abiotic stimulus		Predicted intracellular proteins	Nucleoplasm (Approved); Additional: Cytosol				0.0	0.0	0.0	0.0	0.0	0.0	0.0	0.0	0.0	0.0	0.0	0.0	0.0	0.0	0.0	0.0	0.0	0.0	0.0	0.0
NEK1	4750	symbol	H. sapiens	4750	H. sapiens	NEK1	NIMA related kinase 1	GO:0042769 DNA damage response, detection of DNA damage;GO:0060271 cilium assembly;GO:0018108 peptidyl-tyrosine phosphorylation	NEK Ser/Thr protein kinase family	Kinases:NEK Ser/Thr protein kinases; Disease related genes; ENZYME proteins:Transferases; Predicted intracellular proteins; Potential drug targets; Enzymes	Cytosol (Supported); Additional: Centriolar satellite;Nucleoplasm	Fostamatinib	(M10154)SA G2 AND M PHASES		0.0	1.0	1.0	1.0	0.0	0.0	0.0	0.0	0.0	0.0	0.0	0.0	0.0	0.0	0.0	0.0	0.0	0.0	0.0	0.0
F8	2157	symbol	H. sapiens	2157	H. sapiens	F8	coagulation factor VIII	GO:0007597 blood coagulation, intrinsic pathway;GO:0072378 blood coagulation, fibrin clot formation;GO:0072376 protein activation cascade		Disease related genes; FDA approved drug targets:Biotech drugs; Predicted intracellular proteins; Candidate cardiovascular disease genes; Predicted secreted proteins		Drotrecogin alfa; Coagulation Factor IX (Recombinant); TB-402; Thrombin; Protein C; Human thrombin; Thrombin alfa; Vonicog Alfa; Von Willebrand Factor Human; Anti-inhibitor coagulant complex; Coagulation Factor IX Human; Nonacog beta pegol; Damoctocog alfa pegol		(M5946)HALLMARK COAGULATION; (M5921)HALLMARK COMPLEMENT	0.0	0.0	0.0	0.0	0.0	0.0	0.0	0.0	0.0	0.0	0.0	0.0	0.0	0.0	0.0	0.0	0.0	0.0	0.0	0.0
MSL1	339287	symbol	H. sapiens	339287	H. sapiens	MSL1	MSL complex subunit 1	GO:0043984 histone H4-K16 acetylation;GO:0043967 histone H4 acetylation;GO:0016573 histone acetylation		Predicted intracellular proteins	Nucleoplasm (Enhanced)				0.0	0.0	0.0	0.0	0.0	1.0	0.0	0.0	0.0	0.0	0.0	0.0	0.0	0.0	0.0	0.0	0.0	0.0	0.0	0.0
CDC23	8697	symbol	H. sapiens	8697	H. sapiens	CDC23	cell division cycle 23	GO:0045842 positive regulation of mitotic metaphase/anaphase transition;GO:1901970 positive regulation of mitotic sister chromatid separation;GO:1902101 positive regulation of metaphase/anaphase transition of cell cycle		Predicted intracellular proteins					0.0	0.0	0.0	1.0	0.0	0.0	0.0	1.0	0.0	0.0	1.0	0.0	0.0	1.0	0.0	0.0	0.0	1.0	0.0	0.0
CARD8	22900	symbol	H. sapiens	22900	H. sapiens	CARD8	caspase recruitment domain family member 8	GO:0097340 inhibition of cysteine-type endopeptidase activity;GO:0097341 zymogen inhibition;GO:1900226 negative regulation of NLRP3 inflammasome complex assembly		Predicted intracellular proteins	Nucleoplasm (Supported)				0.0	0.0	0.0	0.0	0.0	0.0	0.0	0.0	0.0	0.0	0.0	0.0	0.0	0.0	0.0	0.0	0.0	0.0	0.0	1.0
ZNF326	284695	symbol	H. sapiens	284695	H. sapiens	ZNF326	zinc finger protein 326	GO:0032784 regulation of DNA-templated transcription, elongation;GO:0006354 DNA-templated transcription, elongation;GO:0043484 regulation of RNA splicing		Predicted intracellular proteins	Nucleoplasm (Enhanced); Additional: Golgi apparatus;Vesicles				1.0	0.0	0.0	0.0	0.0	0.0	0.0	0.0	0.0	0.0	0.0	0.0	0.0	0.0	0.0	0.0	0.0	0.0	0.0	0.0
ELK3	2004	symbol	H. sapiens	2004	H. sapiens	ELK3	ETS transcription factor ELK3	GO:0042060 wound healing;GO:0009611 response to wounding;GO:0001525 angiogenesis		Predicted intracellular proteins; Transcription factors:Helix-turn-helix domains; Cancer-related genes:Candidate cancer biomarkers	Nucleoplasm (Supported); Additional: Mitochondria				0.0	0.0	0.0	0.0	0.0	0.0	0.0	0.0	0.0	0.0	0.0	0.0	0.0	0.0	0.0	0.0	0.0	0.0	0.0	0.0
ZNF182	7569	symbol	H. sapiens	7569	H. sapiens	ZNF182	zinc finger protein 182	GO:0006357 regulation of transcription by RNA polymerase II;GO:0006366 transcription by RNA polymerase II;GO:0006355 regulation of transcription, DNA-templated		Transcription factors:Zinc-coordinating DNA-binding domains; Predicted intracellular proteins	Nucleoplasm (Approved)				0.0	0.0	0.0	0.0	0.0	0.0	0.0	0.0	0.0	0.0	0.0	0.0	0.0	0.0	0.0	0.0	0.0	0.0	0.0	0.0
FNBP4	23360	symbol	H. sapiens	23360	H. sapiens	FNBP4	formin binding protein 4			Predicted intracellular proteins	Nuclear speckles (Enhanced)				0.0	0.0	0.0	0.0	0.0	0.0	0.0	0.0	0.0	0.0	0.0	0.0	0.0	0.0	0.0	0.0	0.0	0.0	0.0	0.0
PCNXL4	64430	gene_synonym	H. sapiens	64430	H. sapiens	PCNX4	pecanex 4			Predicted intracellular proteins	Cytosol (Approved)				0.0	0.0	0.0	0.0	0.0	0.0	0.0	0.0	0.0	0.0	0.0	0.0	0.0	0.0	0.0	0.0	0.0	0.0	0.0	0.0
WRN	7486	symbol	H. sapiens	7486	H. sapiens	WRN	WRN RecQ like helicase	GO:0060542 regulation of strand invasion;GO:0098530 positive regulation of strand invasion;GO:0042148 strand invasion		Disease related genes; Predicted intracellular proteins; Cancer-related genes:Mutational cancer driver genes; Potential drug targets; ENZYME proteins:Hydrolases; Cancer-related genes:Candidate cancer biomarkers; Enzymes	Nuclear speckles (Supported)		(M105)PID TELOMERASE PATHWAY	(M5901)HALLMARK G2M CHECKPOINT	0.0	1.0	0.0	1.0	0.0	0.0	1.0	0.0	0.0	0.0	0.0	0.0	0.0	1.0	0.0	0.0	0.0	0.0	0.0	1.0
MYSM1	114803	symbol	H. sapiens	114803	H. sapiens	MYSM1	Myb like, SWIRM and MPN domains 1	GO:0035521 monoubiquitinated histone deubiquitination;GO:0035522 monoubiquitinated histone H2A deubiquitination;GO:0035520 monoubiquitinated protein deubiquitination		Predicted intracellular proteins; Peptidases:Metallopeptidases; Enzymes	Nucleoplasm (Supported); Additional: Nucleoli				0.0	0.0	0.0	0.0	0.0	1.0	0.0	0.0	0.0	0.0	0.0	0.0	0.0	0.0	0.0	0.0	0.0	0.0	0.0	0.0
MIR503HG	84848	symbol	H. sapiens	84848	H. sapiens	MIR503HG	MIR503 host gene								0.0	0.0	0.0	0.0	0.0	0.0	0.0	0.0	0.0	0.0	0.0	0.0	0.0	0.0	0.0	0.0	0.0	0.0	0.0	0.0
SENP1	29843	symbol	H. sapiens	29843	H. sapiens	SENP1	SUMO specific peptidase 1	GO:0016926 protein desumoylation;GO:0006919 activation of cysteine-type endopeptidase activity involved in apoptotic process;GO:0043280 positive regulation of cysteine-type endopeptidase activity involved in apoptotic process		Predicted intracellular proteins; Enzymes; Peptidases:Cysteine-type peptidases	Nucleoplasm (Supported); Additional: Focal adhesion sites		(M151)PID AR TF PATHWAY		0.0	0.0	0.0	0.0	0.0	1.0	0.0	0.0	0.0	0.0	0.0	0.0	0.0	0.0	0.0	0.0	0.0	0.0	0.0	0.0
HTATSF1	27336	symbol	H. sapiens	27336	H. sapiens	HTATSF1	HIV-1 Tat specific factor 1	GO:0032784 regulation of DNA-templated transcription, elongation;GO:0006354 DNA-templated transcription, elongation;GO:0019079 viral genome replication		Predicted intracellular proteins	Nucleoplasm (Enhanced)				1.0	0.0	0.0	0.0	0.0	0.0	0.0	0.0	0.0	0.0	0.0	0.0	0.0	0.0	0.0	0.0	0.0	0.0	0.0	0.0
RNF111	54778	symbol	H. sapiens	54778	H. sapiens	RNF111	ring finger protein 111	GO:0070911 global genome nucleotide-excision repair;GO:0030579 ubiquitin-dependent SMAD protein catabolic process;GO:0030511 positive regulation of transforming growth factor beta receptor signaling pathway		Predicted intracellular proteins; Enzymes; ENZYME proteins:Transferases	Nucleoplasm (Supported); Additional: Cytosol		(M286)PID TGFBR PATHWAY		0.0	1.0	0.0	0.0	0.0	0.0	0.0	0.0	0.0	0.0	1.0	0.0	0.0	0.0	0.0	0.0	0.0	0.0	0.0	1.0
DNAJC27	51277	symbol	H. sapiens	51277	H. sapiens	DNAJC27	DnaJ heat shock protein family (Hsp40) member C27	GO:0071701 regulation of MAPK export from nucleus;GO:0045204 MAPK export from nucleus;GO:0046825 regulation of protein export from nucleus		Predicted intracellular proteins	Cytosol (Approved)				0.0	0.0	0.0	0.0	0.0	0.0	1.0	0.0	0.0	0.0	0.0	0.0	1.0	0.0	0.0	0.0	0.0	0.0	0.0	0.0
WWP1	11059	symbol	H. sapiens	11059	H. sapiens	WWP1	WW domain containing E3 ubiquitin protein ligase 1	GO:0046718 viral entry into host cell;GO:0044409 entry into host;GO:0052126 movement in host environment		Predicted intracellular proteins; Enzymes; ENZYME proteins:Transferases	Cytosol (Approved); Additional: Golgi apparatus;Plasma membrane		(M13)PID ERBB4 PATHWAY; (M236)PID DELTA NP63 PATHWAY; (M256)PID TAP63 PATHWAY	(M5939)HALLMARK P53 PATHWAY	0.0	0.0	0.0	0.0	0.0	0.0	0.0	0.0	1.0	0.0	1.0	0.0	0.0	0.0	0.0	0.0	0.0	0.0	1.0	1.0
AADAT	51166	symbol	H. sapiens	51166	H. sapiens	AADAT	aminoadipate aminotransferase	GO:0033512 L-lysine catabolic process to acetyl-CoA via saccharopine;GO:0019474 L-lysine catabolic process to acetyl-CoA;GO:0019477 L-lysine catabolic process		Predicted intracellular proteins; Enzymes; ENZYME proteins:Transferases	Plasma membrane (Approved); Additional: Vesicles	Pyridoxal phosphate; Glutamic acid		(M5935)HALLMARK FATTY ACID METABOLISM	0.0	0.0	0.0	0.0	0.0	0.0	0.0	0.0	0.0	0.0	0.0	0.0	0.0	0.0	0.0	0.0	0.0	0.0	0.0	0.0
THOC1	9984	symbol	H. sapiens	9984	H. sapiens	THOC1	THO complex 1	GO:0048297 negative regulation of isotype switching to IgA isotypes;GO:0045829 negative regulation of isotype switching;GO:2000002 negative regulation of DNA damage checkpoint		Predicted intracellular proteins	Nuclear speckles (Enhanced)				1.0	1.0	0.0	0.0	0.0	0.0	1.0	0.0	0.0	0.0	0.0	0.0	1.0	1.0	0.0	0.0	0.0	0.0	0.0	0.0
CEP162	22832	symbol	H. sapiens	22832	H. sapiens	CEP162	centrosomal protein 162	GO:0060271 cilium assembly;GO:0044782 cilium organization;GO:0120031 plasma membrane bounded cell projection assembly		Predicted intracellular proteins	Cytosol;Plasma membrane (Enhanced); Additional: Nucleoplasm				0.0	0.0	1.0	0.0	0.0	0.0	0.0	0.0	0.0	0.0	0.0	0.0	0.0	0.0	0.0	0.0	0.0	0.0	0.0	0.0
DRAM2	128338	symbol	H. sapiens	128338	H. sapiens	DRAM2	DNA damage regulated autophagy modulator 2	GO:0045494 photoreceptor cell maintenance;GO:0001895 retina homeostasis;GO:0007601 visual perception			Golgi apparatus;Vesicles (Enhanced)			(M5905)HALLMARK ADIPOGENESIS	0.0	0.0	0.0	0.0	0.0	0.0	0.0	0.0	0.0	0.0	0.0	0.0	0.0	0.0	0.0	0.0	0.0	0.0	0.0	0.0
KATNA1	11104	symbol	H. sapiens	11104	H. sapiens	KATNA1	katanin catalytic subunit A1	GO:0051013 microtubule severing;GO:0051301 cell division;GO:0000226 microtubule cytoskeleton organization		Predicted intracellular proteins; Enzymes; ENZYME proteins:Hydrolases	Centriolar satellite (Supported); Additional: Nucleoplasm		(M163)PID LIS1 PATHWAY	(M5893)HALLMARK MITOTIC SPINDLE; (M5901)HALLMARK G2M CHECKPOINT	0.0	0.0	0.0	1.0	0.0	0.0	0.0	0.0	0.0	0.0	0.0	1.0	0.0	0.0	0.0	0.0	0.0	0.0	0.0	0.0
USPL1	10208	symbol	H. sapiens	10208	H. sapiens	USPL1	ubiquitin specific peptidase like 1	GO:0030576 Cajal body organization;GO:0016926 protein desumoylation;GO:0030575 nuclear body organization		Predicted intracellular proteins; Enzymes; Peptidases:Cysteine-type peptidases					0.0	0.0	0.0	0.0	0.0	1.0	0.0	0.0	0.0	0.0	0.0	0.0	0.0	0.0	0.0	0.0	0.0	0.0	0.0	0.0
NAA40	79829	symbol	H. sapiens	79829	H. sapiens	NAA40	N-alpha-acetyltransferase 40, NatD catalytic subunit	GO:0006474 N-terminal protein amino acid acetylation;GO:0043968 histone H2A acetylation;GO:0031365 N-terminal protein amino acid modification		Predicted intracellular proteins; Enzymes; ENZYME proteins:Transferases	Nucleoplasm (Supported); Additional: Centriolar satellite;Cytosol				0.0	0.0	0.0	0.0	0.0	1.0	0.0	0.0	0.0	0.0	0.0	0.0	0.0	0.0	0.0	0.0	0.0	0.0	0.0	0.0
SUPT20H	55578	symbol	H. sapiens	55578	H. sapiens	SUPT20H	SPT20 homolog, SAGA complex component	GO:0007369 gastrulation;GO:0006914 autophagy;GO:0061919 process utilizing autophagic mechanism		Predicted intracellular proteins	Nucleoli fibrillar center (Approved)				0.0	0.0	0.0	0.0	0.0	1.0	0.0	0.0	0.0	0.0	0.0	0.0	0.0	0.0	0.0	0.0	0.0	0.0	0.0	0.0
VPS54	51542	symbol	H. sapiens	51542	H. sapiens	VPS54	VPS54 subunit of GARP complex	GO:0060052 neurofilament cytoskeleton organization;GO:0006896 Golgi to vacuole transport;GO:0048873 homeostasis of number of cells within a tissue		Predicted intracellular proteins	Golgi apparatus (Enhanced); Additional: Nucleoplasm				0.0	0.0	0.0	0.0	0.0	0.0	0.0	0.0	0.0	0.0	0.0	0.0	0.0	0.0	0.0	0.0	0.0	0.0	0.0	0.0
PPIG	9360	symbol	H. sapiens	9360	H. sapiens	PPIG	peptidylprolyl isomerase G	GO:0000413 protein peptidyl-prolyl isomerization;GO:0018208 peptidyl-proline modification;GO:0006457 protein folding		Predicted intracellular proteins; ENZYME proteins:Isomerase; Enzymes	Nuclear speckles (Supported); Additional: Cytosol	Proline			1.0	0.0	0.0	0.0	0.0	0.0	0.0	0.0	0.0	0.0	0.0	0.0	0.0	0.0	0.0	0.0	0.0	0.0	0.0	0.0
KIAA0753	9851	symbol	H. sapiens	9851	H. sapiens	KIAA0753	KIAA0753	GO:0071539 protein localization to centrosome;GO:1905508 protein localization to microtubule organizing center;GO:0007099 centriole replication		Predicted intracellular proteins; Disease related genes	Centrosome;Cytosol (Enhanced)				0.0	0.0	1.0	0.0	0.0	0.0	0.0	0.0	0.0	0.0	0.0	1.0	0.0	0.0	1.0	0.0	0.0	0.0	0.0	0.0
NIPBL	25836	symbol	H. sapiens	25836	H. sapiens	NIPBL	NIPBL cohesin loading factor	GO:0035261 external genitalia morphogenesis;GO:0061780 mitotic cohesin loading;GO:0034087 establishment of mitotic sister chromatid cohesion		Predicted intracellular proteins; Disease related genes	Nucleoplasm (Supported); Additional: Cytosol;Vesicles			(M5942)HALLMARK UV RESPONSE DN	0.0	1.0	0.0	1.0	0.0	1.0	1.0	0.0	0.0	1.0	0.0	0.0	0.0	0.0	0.0	0.0	0.0	1.0	0.0	0.0
PRLR	5618	symbol	H. sapiens	5618	H. sapiens	PRLR	prolactin receptor	GO:0038161 prolactin signaling pathway;GO:0038165 oncostatin-M-mediated signaling pathway;GO:0048861 leukemia inhibitory factor signaling pathway		FDA approved drug targets:Small molecule drugs; Predicted intracellular proteins; Disease related genes; FDA approved drug targets:Biotech drugs		Somatotropin	(M13)PID ERBB4 PATHWAY; (M50)PID PTP1B PATHWAY	(M5907)HALLMARK ESTROGEN RESPONSE LATE	0.0	0.0	0.0	0.0	0.0	0.0	0.0	0.0	0.0	0.0	0.0	0.0	0.0	0.0	0.0	0.0	0.0	0.0	0.0	1.0
PRPF4B	8899	symbol	H. sapiens	8899	H. sapiens	PRPF4B	pre-mRNA processing factor 4B	GO:0045292 mRNA cis splicing, via spliceosome;GO:0000377 RNA splicing, via transesterification reactions with bulged adenosine as nucleophile;GO:0000398 mRNA splicing, via spliceosome	CMGC Ser/Thr protein kinase family	Kinases:CMGC Ser/Thr protein kinases; Predicted intracellular proteins; Enzymes; ENZYME proteins:Transferases	Nuclear speckles (Supported)	Fostamatinib		(M5901)HALLMARK G2M CHECKPOINT	1.0	0.0	0.0	0.0	0.0	0.0	0.0	0.0	0.0	0.0	0.0	0.0	0.0	0.0	0.0	0.0	0.0	0.0	0.0	0.0
DNAJB5	25822	symbol	H. sapiens	25822	H. sapiens	DNAJB5	DnaJ heat shock protein family (Hsp40) member B5	GO:0051085 chaperone cofactor-dependent protein refolding;GO:0051084 'de novo' posttranslational protein folding;GO:0006458 'de novo' protein folding		Predicted intracellular proteins	Nucleoplasm (Approved); Additional: Cytosol				0.0	0.0	0.0	0.0	0.0	0.0	0.0	0.0	0.0	0.0	0.0	0.0	0.0	0.0	0.0	0.0	0.0	0.0	0.0	0.0
GPATCH8	23131	symbol	H. sapiens	23131	H. sapiens	GPATCH8	G-patch domain containing 8	GO:0008150 biological_process		Predicted intracellular proteins	Nuclear speckles (Approved); Additional: Mitochondria				0.0	0.0	0.0	0.0	0.0	0.0	0.0	0.0	0.0	0.0	0.0	0.0	0.0	0.0	0.0	0.0	0.0	0.0	0.0	0.0
PTCD3	55037	symbol	H. sapiens	55037	H. sapiens	PTCD3	pentatricopeptide repeat domain 3	GO:0032543 mitochondrial translation;GO:0140053 mitochondrial gene expression;GO:0006417 regulation of translation		Ribosomal proteins; Predicted intracellular proteins	Mitochondria (Supported)			(M5905)HALLMARK ADIPOGENESIS	0.0	0.0	0.0	0.0	0.0	0.0	0.0	0.0	1.0	0.0	0.0	0.0	0.0	0.0	0.0	0.0	0.0	0.0	0.0	0.0
ECM1	1893	symbol	H. sapiens	1893	H. sapiens	ECM1	extracellular matrix protein 1	GO:0030502 negative regulation of bone mineralization;GO:0003416 endochondral bone growth;GO:0098868 bone growth		Disease related genes; Predicted secreted proteins	Cytosol (Approved); Additional: Nucleoplasm		(M3008)NABA ECM GLYCOPROTEINS; (M5884)NABA CORE MATRISOME; (M5889)NABA MATRISOME	(M5947)HALLMARK IL2 STAT5 SIGNALING; (M5930)HALLMARK EPITHELIAL MESENCHYMAL TRANSITION	0.0	0.0	0.0	0.0	0.0	0.0	0.0	0.0	0.0	0.0	0.0	0.0	0.0	0.0	0.0	0.0	0.0	0.0	0.0	0.0
ZC3H14	79882	symbol	H. sapiens	79882	H. sapiens	ZC3H14	zinc finger CCCH-type containing 14	GO:1900364 negative regulation of mRNA polyadenylation;GO:0031441 negative regulation of mRNA 3'-end processing;GO:1900363 regulation of mRNA polyadenylation		Predicted intracellular proteins; Disease related genes	Nuclear speckles (Enhanced); Additional: Nucleoli;Nucleoli rim			(M5951)HALLMARK SPERMATOGENESIS	1.0	0.0	0.0	0.0	1.0	0.0	0.0	0.0	1.0	0.0	0.0	0.0	0.0	0.0	0.0	0.0	0.0	0.0	0.0	0.0
LINC00342	150759	symbol	H. sapiens	150759	H. sapiens	LINC00342	long intergenic non-protein coding RNA 342								0.0	0.0	0.0	0.0	0.0	0.0	0.0	0.0	0.0	0.0	0.0	0.0	0.0	0.0	0.0	0.0	0.0	0.0	0.0	0.0
CD109	135228	symbol	H. sapiens	135228	H. sapiens	CD109	CD109 molecule	GO:0072675 osteoclast fusion;GO:0072674 multinuclear osteoclast differentiation;GO:0010839 negative regulation of keratinocyte proliferation		CD markers	Plasma membrane (Supported); Additional: Cytosol		(M3468)NABA ECM REGULATORS; (M5885)NABA MATRISOME ASSOCIATED; (M5889)NABA MATRISOME		0.0	0.0	0.0	0.0	0.0	0.0	0.0	0.0	0.0	0.0	0.0	0.0	0.0	0.0	0.0	0.0	0.0	0.0	0.0	0.0
OARD1	221443	symbol	H. sapiens	221443	H. sapiens	OARD1	O-acyl-ADP-ribose deacylase 1	GO:0140291 peptidyl-glutamate ADP-deribosylation;GO:0051725 protein de-ADP-ribosylation;GO:0042278 purine nucleoside metabolic process		Predicted intracellular proteins	Nucleoli (Supported); Additional: Nucleoplasm				0.0	1.0	0.0	0.0	0.0	0.0	0.0	0.0	0.0	0.0	0.0	0.0	0.0	0.0	0.0	0.0	0.0	0.0	0.0	0.0
PNN	5411	symbol	H. sapiens	5411	H. sapiens	PNN	pinin, desmosome associated protein	GO:0000377 RNA splicing, via transesterification reactions with bulged adenosine as nucleophile;GO:0000398 mRNA splicing, via spliceosome;GO:0000375 RNA splicing, via transesterification reactions		Transporters:Primary Active Transporters; Predicted intracellular proteins	Nuclear speckles (Supported)			(M5925)HALLMARK E2F TARGETS	1.0	0.0	0.0	0.0	0.0	0.0	0.0	0.0	0.0	0.0	0.0	0.0	1.0	0.0	0.0	0.0	0.0	0.0	0.0	0.0
PSMD5	5711	symbol	H. sapiens	5711	H. sapiens	PSMD5	proteasome 26S subunit, non-ATPase 5	GO:0070682 proteasome regulatory particle assembly;GO:0043248 proteasome assembly;GO:0034622 cellular protein-containing complex assembly		Predicted intracellular proteins	Cytosol (Approved); Additional: Nucleoplasm				1.0	0.0	0.0	1.0	0.0	0.0	0.0	0.0	0.0	0.0	0.0	0.0	0.0	1.0	0.0	0.0	0.0	0.0	0.0	1.0
PRPF38A	84950	symbol	H. sapiens	84950	H. sapiens	PRPF38A	pre-mRNA processing factor 38A	GO:0000377 RNA splicing, via transesterification reactions with bulged adenosine as nucleophile;GO:0000398 mRNA splicing, via spliceosome;GO:0000375 RNA splicing, via transesterification reactions		Predicted intracellular proteins	Nucleoplasm (Enhanced)				1.0	0.0	0.0	0.0	0.0	0.0	0.0	0.0	0.0	0.0	0.0	0.0	0.0	0.0	0.0	0.0	0.0	0.0	0.0	0.0
WAC	51322	symbol	H. sapiens	51322	H. sapiens	WAC	WW domain containing adaptor with coiled-coil	GO:0071894 histone H2B conserved C-terminal lysine ubiquitination;GO:0033523 histone H2B ubiquitination;GO:1904263 positive regulation of TORC1 signaling		Predicted intracellular proteins; Disease related genes	Nucleoplasm (Enhanced)				0.0	1.0	0.0	0.0	1.0	1.0	0.0	0.0	1.0	0.0	1.0	0.0	0.0	0.0	0.0	0.0	0.0	0.0	0.0	0.0
RBM22	55696	symbol	H. sapiens	55696	H. sapiens	RBM22	RNA binding motif protein 22	GO:0046827 positive regulation of protein export from nucleus;GO:0046825 regulation of protein export from nucleus;GO:0033120 positive regulation of RNA splicing		Predicted intracellular proteins	Nucleoplasm (Enhanced)				1.0	0.0	0.0	0.0	0.0	0.0	1.0	0.0	0.0	0.0	0.0	0.0	1.0	0.0	0.0	0.0	0.0	0.0	0.0	0.0
ENPP5	59084	symbol	H. sapiens	59084	H. sapiens	ENPP5	ectonucleotide pyrophosphatase/phosphodiesterase family member 5	GO:0007154 cell communication;GO:0009987 cellular process;GO:0008150 biological_process			Cytosol (Approved); Additional: Nucleoplasm				0.0	0.0	0.0	0.0	0.0	0.0	0.0	0.0	0.0	0.0	0.0	0.0	0.0	0.0	0.0	0.0	0.0	0.0	0.0	0.0
ZNF117	51351	symbol	H. sapiens	51351	H. sapiens	ZNF117	zinc finger protein 117	GO:0006357 regulation of transcription by RNA polymerase II;GO:0006366 transcription by RNA polymerase II;GO:0006355 regulation of transcription, DNA-templated		Transcription factors:Zinc-coordinating DNA-binding domains; Predicted intracellular proteins	Cytosol;Nucleoli fibrillar center (Approved)				0.0	0.0	0.0	0.0	0.0	0.0	0.0	0.0	0.0	0.0	0.0	0.0	0.0	0.0	0.0	0.0	0.0	0.0	0.0	0.0
SCN8A	6334	symbol	H. sapiens	6334	H. sapiens	SCN8A	sodium voltage-gated channel alpha subunit 8	GO:0019228 neuronal action potential;GO:0086010 membrane depolarization during action potential;GO:0019226 transmission of nerve impulse		Disease related genes; Predicted intracellular proteins; Transporters:Transporter channels and pores; Voltage-gated ion channels:Voltage-Gated Sodium Channels; FDA approved drug targets:Small molecule drugs	Plasma membrane (Approved); Additional: Cell Junctions;Vesicles	Phenytoin; Tetrodotoxin		(M5942)HALLMARK UV RESPONSE DN	0.0	0.0	0.0	0.0	0.0	0.0	0.0	0.0	0.0	0.0	0.0	0.0	0.0	0.0	0.0	0.0	0.0	0.0	0.0	0.0
LOC101927204	101927204	Gene_ID	H. sapiens	101927204	H. sapiens	FAM111A-DT	FAM111A divergent transcript								0.0	0.0	0.0	0.0	0.0	0.0	0.0	0.0	0.0	0.0	0.0	0.0	0.0	0.0	0.0	0.0	0.0	0.0	0.0	0.0
GOLGA1	2800	symbol	H. sapiens	2800	H. sapiens	GOLGA1	golgin A1			Predicted intracellular proteins	Golgi apparatus (Enhanced)				0.0	0.0	0.0	0.0	0.0	0.0	0.0	0.0	0.0	0.0	0.0	0.0	0.0	0.0	0.0	0.0	0.0	0.0	0.0	0.0
LRRC6	23639	gene_synonym	H. sapiens	23639	H. sapiens	DNAAF11	dynein axonemal assembly factor 11	GO:0120229 protein localization to motile cilium;GO:0090660 cerebrospinal fluid circulation;GO:0060287 epithelial cilium movement involved in determination of left/right asymmetry		Predicted intracellular proteins; Disease related genes					0.0	0.0	1.0	0.0	0.0	0.0	0.0	0.0	0.0	0.0	0.0	1.0	0.0	0.0	0.0	0.0	0.0	0.0	0.0	0.0
ZNF137P	7696	symbol	H. sapiens	7696	H. sapiens	ZNF137P	zinc finger protein 137, pseudogene								0.0	0.0	0.0	0.0	0.0	0.0	0.0	0.0	0.0	0.0	0.0	0.0	0.0	0.0	0.0	0.0	0.0	0.0	0.0	0.0
VPS35	55737	symbol	H. sapiens	55737	H. sapiens	VPS35	VPS35 retromer complex component	GO:2000331 regulation of terminal button organization;GO:1902823 negative regulation of late endosome to lysosome transport;GO:1903336 negative regulation of vacuolar transport		Predicted intracellular proteins; Disease related genes	Endosomes;Lysosomes (Supported)				0.0	0.0	0.0	0.0	0.0	0.0	0.0	1.0	1.0	0.0	0.0	0.0	1.0	0.0	0.0	0.0	0.0	1.0	0.0	0.0
TAF9	6880	symbol	H. sapiens	6880	H. sapiens	TAF9	TATA-box binding protein associated factor 9	GO:0000492 box C/D snoRNP assembly;GO:0000491 small nucleolar ribonucleoprotein complex assembly;GO:1902166 negative regulation of intrinsic apoptotic signaling pathway in response to DNA damage by p53 class mediator		Predicted intracellular proteins	Nucleoplasm (Enhanced)		(M139)PID MYC PATHWAY; (M66)PID MYC ACTIV PATHWAY; (M145)PID P53 DOWNSTREAM PATHWAY	(M5898)HALLMARK DNA REPAIR	0.0	1.0	0.0	0.0	0.0	1.0	0.0	0.0	0.0	0.0	1.0	0.0	0.0	1.0	0.0	0.0	1.0	0.0	0.0	0.0
ATF7	11016	symbol	H. sapiens	11016	H. sapiens	ATF7	activating transcription factor 7	GO:0045944 positive regulation of transcription by RNA polymerase II;GO:0045893 positive regulation of transcription, DNA-templated;GO:1903508 positive regulation of nucleic acid-templated transcription		Transcription factors:Basic domains; Predicted intracellular proteins	Cytosol;Nucleoplasm (Approved)		(M279)PID RB 1PATHWAY		0.0	0.0	0.0	0.0	0.0	0.0	0.0	0.0	0.0	0.0	0.0	0.0	0.0	0.0	0.0	0.0	0.0	0.0	0.0	0.0
C2orf76	130355	symbol	H. sapiens	130355	H. sapiens	C2orf76	chromosome 2 open reading frame 76			Predicted intracellular proteins	Endoplasmic reticulum (Approved)				0.0	0.0	0.0	0.0	0.0	0.0	0.0	0.0	0.0	0.0	0.0	0.0	0.0	0.0	0.0	0.0	0.0	0.0	0.0	0.0
FOXJ2	55810	symbol	H. sapiens	55810	H. sapiens	FOXJ2	forkhead box J2	GO:0110059 negative regulation of blood vessel endothelial cell differentiation;GO:0110057 regulation of blood vessel endothelial cell differentiation;GO:0060837 blood vessel endothelial cell differentiation		Predicted intracellular proteins; Transcription factors:Helix-turn-helix domains	Nucleoplasm (Supported); Additional: Nucleoli fibrillar center			(M5945)HALLMARK HEME METABOLISM	0.0	0.0	0.0	0.0	0.0	0.0	0.0	0.0	0.0	0.0	0.0	0.0	0.0	0.0	0.0	1.0	0.0	1.0	0.0	0.0
PQLC2L	152078	gene_synonym	H. sapiens	152078	H. sapiens	SLC66A1L	solute carrier family 66 member 1 like	GO:1902022 L-lysine transport;GO:1903401 L-lysine transmembrane transport;GO:1903826 arginine transmembrane transport		Predicted intracellular proteins	Nuclear bodies;Nucleoplasm (Approved)				0.0	0.0	0.0	0.0	0.0	0.0	0.0	0.0	0.0	0.0	0.0	0.0	0.0	0.0	0.0	0.0	0.0	0.0	0.0	0.0
CEP63	80254	symbol	H. sapiens	80254	H. sapiens	CEP63	centrosomal protein 63	GO:0097742 de novo centriole assembly;GO:0098535 de novo centriole assembly involved in multi-ciliated epithelial cell differentiation;GO:1903251 multi-ciliated epithelial cell differentiation		Predicted intracellular proteins; Disease related genes	Nucleoplasm (Approved)				0.0	1.0	1.0	1.0	0.0	0.0	0.0	0.0	0.0	0.0	0.0	1.0	0.0	1.0	1.0	0.0	0.0	0.0	0.0	0.0
MBD4	8930	symbol	H. sapiens	8930	H. sapiens	MBD4	methyl-CpG binding domain 4, DNA glycosylase	GO:0045008 depyrimidination;GO:0006285 base-excision repair, AP site formation;GO:0009223 pyrimidine deoxyribonucleotide catabolic process		Predicted intracellular proteins; Cancer-related genes:Candidate cancer biomarkers	Nuclear speckles (Supported)				0.0	1.0	0.0	0.0	0.0	0.0	0.0	0.0	1.0	0.0	0.0	0.0	0.0	0.0	0.0	0.0	0.0	0.0	0.0	0.0
ADIPOR2	79602	symbol	H. sapiens	79602	H. sapiens	ADIPOR2	adiponectin receptor 2	GO:0061871 negative regulation of hepatic stellate cell migration;GO:0061868 hepatic stellate cell migration;GO:0061869 regulation of hepatic stellate cell migration						(M5916)HALLMARK APICAL SURFACE; (M5935)HALLMARK FATTY ACID METABOLISM; (M5905)HALLMARK ADIPOGENESIS	0.0	0.0	0.0	0.0	0.0	0.0	0.0	0.0	0.0	0.0	0.0	0.0	0.0	0.0	0.0	0.0	0.0	0.0	0.0	0.0
UPF2	26019	symbol	H. sapiens	26019	H. sapiens	UPF2	UPF2 regulator of nonsense mediated mRNA decay	GO:0000184 nuclear-transcribed mRNA catabolic process, nonsense-mediated decay;GO:0006406 mRNA export from nucleus;GO:0071427 mRNA-containing ribonucleoprotein complex export from nucleus		Predicted intracellular proteins	Cytosol (Supported); Additional: Cytoplasmic bodies				1.0	0.0	0.0	0.0	0.0	0.0	1.0	0.0	1.0	0.0	0.0	0.0	1.0	0.0	0.0	0.0	0.0	0.0	0.0	0.0
CYB5D1	124637	symbol	H. sapiens	124637	H. sapiens	CYB5D1	cytochrome b5 domain containing 1			Predicted intracellular proteins	Golgi apparatus;Nucleoli (Approved)				0.0	0.0	0.0	0.0	0.0	0.0	0.0	0.0	0.0	0.0	0.0	0.0	0.0	0.0	0.0	0.0	0.0	0.0	0.0	0.0
NFYA	4800	symbol	H. sapiens	4800	H. sapiens	NFYA	nuclear transcription factor Y subunit alpha	GO:0048511 rhythmic process;GO:0045893 positive regulation of transcription, DNA-templated;GO:1903508 positive regulation of nucleic acid-templated transcription		Predicted intracellular proteins; Transcription factors:Other all-alpha-helical DNA-binding domains	Nucleoplasm (Supported)		(M254)PID MYC REPRESS PATHWAY; (M145)PID P53 DOWNSTREAM PATHWAY	(M5922)HALLMARK UNFOLDED PROTEIN RESPONSE	0.0	0.0	0.0	0.0	0.0	0.0	0.0	0.0	0.0	0.0	0.0	0.0	0.0	0.0	0.0	0.0	1.0	0.0	0.0	0.0
SNHG1	23642	symbol	H. sapiens	23642	H. sapiens	SNHG1	small nucleolar RNA host gene 1	GO:0006396 RNA processing;GO:0016070 RNA metabolic process;GO:0090304 nucleic acid metabolic process							0.0	0.0	0.0	0.0	0.0	0.0	0.0	0.0	0.0	0.0	0.0	0.0	0.0	0.0	0.0	0.0	0.0	0.0	0.0	0.0
HACD4	401494	symbol	H. sapiens	401494	H. sapiens	HACD4	3-hydroxyacyl-CoA dehydratase 4	GO:0030497 fatty acid elongation;GO:0042761 very long-chain fatty acid biosynthetic process;GO:0000038 very long-chain fatty acid metabolic process		ENZYME proteins:Lyases; Enzymes					0.0	0.0	0.0	0.0	0.0	0.0	0.0	0.0	0.0	0.0	0.0	0.0	0.0	0.0	0.0	0.0	0.0	0.0	0.0	0.0
ERLIN1	10613	symbol	H. sapiens	10613	H. sapiens	ERLIN1	ER lipid raft associated 1	GO:0045541 negative regulation of cholesterol biosynthetic process;GO:0090206 negative regulation of cholesterol metabolic process;GO:0106119 negative regulation of sterol biosynthetic process		Potential drug targets; Disease related genes; Transporters:Transporter channels and pores; Predicted intracellular proteins	Endoplasmic reticulum (Supported)				0.0	0.0	0.0	0.0	0.0	0.0	0.0	0.0	0.0	0.0	1.0	0.0	0.0	0.0	0.0	0.0	0.0	0.0	0.0	0.0
CEP95	90799	symbol	H. sapiens	90799	H. sapiens	CEP95	centrosomal protein 95			Predicted intracellular proteins	Nucleoplasm (Approved); Additional: Centrosome;Mitotic spindle;Vesicles				0.0	0.0	0.0	0.0	0.0	0.0	0.0	0.0	0.0	0.0	0.0	0.0	0.0	0.0	0.0	0.0	0.0	0.0	0.0	0.0
PRDM1	639	symbol	H. sapiens	639	H. sapiens	PRDM1	PR/SET domain 1	GO:0033082 regulation of extrathymic T cell differentiation;GO:1990654 sebum secreting cell proliferation;GO:0033078 extrathymic T cell differentiation		Cancer-related genes:Mutated cancer genes; Transcription factors:Zinc-coordinating DNA-binding domains; Predicted intracellular proteins	Nucleoli (Approved); Additional: Nucleoplasm		(M145)PID P53 DOWNSTREAM PATHWAY	(M5953)HALLMARK KRAS SIGNALING UP	0.0	0.0	0.0	0.0	0.0	0.0	0.0	0.0	0.0	1.0	0.0	0.0	0.0	1.0	0.0	1.0	0.0	0.0	1.0	0.0
SYNJ1	8867	symbol	H. sapiens	8867	H. sapiens	SYNJ1	synaptojanin 1	GO:1904980 positive regulation of endosome organization;GO:1904978 regulation of endosome organization;GO:0016191 synaptic vesicle uncoating		Disease related genes; Predicted intracellular proteins; Potential drug targets; ENZYME proteins:Hydrolases; Enzymes	Cytosol;Nucleoplasm (Approved); Additional: Centrosome		(M62)PID EPHB FWD PATHWAY; (M214)PID ERBB1 INTERNALIZATION PATHWAY	(M5945)HALLMARK HEME METABOLISM	0.0	0.0	0.0	0.0	0.0	0.0	0.0	1.0	0.0	0.0	0.0	0.0	0.0	0.0	0.0	0.0	0.0	0.0	1.0	0.0
C2CD5	9847	symbol	H. sapiens	9847	H. sapiens	C2CD5	C2 calcium dependent domain containing 5	GO:0038028 insulin receptor signaling pathway via phosphatidylinositol 3-kinase;GO:0031340 positive regulation of vesicle fusion;GO:0031338 regulation of vesicle fusion		Predicted intracellular proteins	Cytosol (Supported); Additional: Centriolar satellite				0.0	0.0	0.0	0.0	0.0	0.0	1.0	1.0	0.0	0.0	0.0	0.0	0.0	0.0	0.0	0.0	0.0	0.0	0.0	0.0
ZFP91	80829	symbol	H. sapiens	80829	H. sapiens	ZFP91	ZFP91 zinc finger protein, atypical E3 ubiquitin ligase	GO:0007250 activation of NF-kappaB-inducing kinase activity;GO:0070534 protein K63-linked ubiquitination;GO:0032147 activation of protein kinase activity		Transcription factors:Zinc-coordinating DNA-binding domains; Predicted intracellular proteins; Enzymes; ENZYME proteins:Transferases	Nucleoli;Nucleoplasm (Supported)		(M5883)NABA SECRETED FACTORS; (M5885)NABA MATRISOME ASSOCIATED; (M5889)NABA MATRISOME		0.0	0.0	0.0	0.0	0.0	0.0	0.0	0.0	0.0	0.0	0.0	0.0	0.0	0.0	0.0	0.0	0.0	0.0	0.0	0.0
SLC25A40	55972	symbol	H. sapiens	55972	H. sapiens	SLC25A40	solute carrier family 25 member 40	GO:0055085 transmembrane transport;GO:0006810 transport;GO:0051234 establishment of localization		Transporters:Electrochemical Potential-driven transporters					0.0	0.0	0.0	0.0	0.0	0.0	0.0	0.0	0.0	0.0	0.0	0.0	0.0	0.0	0.0	0.0	0.0	0.0	0.0	0.0
PREP	5550	symbol	H. sapiens	5550	H. sapiens	PREP	prolyl endopeptidase	GO:0006508 proteolysis;GO:0019538 protein metabolic process;GO:1901564 organonitrogen compound metabolic process		Predicted intracellular proteins; Peptidases:Serine-type peptidases; Enzymes; ENZYME proteins:Hydrolases	Cytosol (Supported)	1-Hydroxy-1-Thio-Glycerol; S-oxy-L-cysteine; Z-Pro-Prolinal; Monothioglycerol; (6S)-1-chloro-3-[(4-fluorobenzyl)oxy]-6-(pyrrolidin-1-ylcarbonyl)pyrrolo[1,2-a]pyrazin-4(6H)-one; 1-{3-oxo-3-[(2S)-2-(pyrrolidin-1-ylcarbonyl)pyrrolidin-1-yl]propyl}-3-phenylquinoxalin-2(1H)-one; 2-{3-[(2S)-4,4-difluoro-2-(pyrrolidin-1-ylcarbonyl)pyrrolidin-1-yl]-3-oxopropyl}-isoindole-1,3(2H)-dione		(M5946)HALLMARK COAGULATION; (M5921)HALLMARK COMPLEMENT	0.0	0.0	0.0	0.0	0.0	0.0	0.0	0.0	0.0	0.0	0.0	0.0	0.0	0.0	0.0	0.0	0.0	0.0	0.0	0.0
PPP1R8	5511	symbol	H. sapiens	5511	H. sapiens	PPP1R8	protein phosphatase 1 regulatory subunit 8	GO:0035308 negative regulation of protein dephosphorylation;GO:0035305 negative regulation of dephosphorylation;GO:0035304 regulation of protein dephosphorylation		Predicted intracellular proteins	Nuclear speckles (Enhanced); Additional: Nucleoplasm			(M5925)HALLMARK E2F TARGETS	1.0	0.0	0.0	0.0	0.0	0.0	0.0	0.0	1.0	0.0	0.0	0.0	0.0	0.0	0.0	0.0	0.0	0.0	0.0	0.0
PARP4	143	symbol	H. sapiens	143	H. sapiens	PARP4	poly(ADP-ribose) polymerase family member 4	GO:0140289 protein mono-ADP-ribosylation;GO:0006471 protein ADP-ribosylation;GO:0051972 regulation of telomerase activity		Predicted intracellular proteins; Enzymes; ENZYME proteins:Transferases	Cytosol (Supported)				0.0	1.0	0.0	0.0	0.0	0.0	0.0	0.0	0.0	0.0	0.0	0.0	0.0	1.0	0.0	0.0	0.0	0.0	0.0	0.0
TNRC6A	27327	symbol	H. sapiens	27327	H. sapiens	TNRC6A	trinucleotide repeat containing adaptor 6A	GO:0060213 positive regulation of nuclear-transcribed mRNA poly(A) tail shortening;GO:0060211 regulation of nuclear-transcribed mRNA poly(A) tail shortening;GO:0000289 nuclear-transcribed mRNA poly(A) tail shortening		Predicted intracellular proteins	Golgi apparatus;Nucleoplasm;Vesicles (Approved)				1.0	0.0	0.0	0.0	1.0	0.0	0.0	0.0	1.0	0.0	0.0	0.0	0.0	1.0	0.0	0.0	0.0	0.0	0.0	0.0
DARS	1615	gene_synonym	H. sapiens	1615	H. sapiens	DARS1	aspartyl-tRNA synthetase 1	GO:0006422 aspartyl-tRNA aminoacylation;GO:0006418 tRNA aminoacylation for protein translation;GO:0043039 tRNA aminoacylation		Disease related genes; ENZYME proteins:Ligase; Predicted intracellular proteins; Potential drug targets; Enzymes	Cytosol (Enhanced)	Aspartic acid		(M5950)HALLMARK ALLOGRAFT REJECTION	0.0	0.0	0.0	0.0	0.0	0.0	0.0	0.0	1.0	0.0	0.0	0.0	0.0	0.0	0.0	0.0	0.0	0.0	0.0	0.0
C3orf67	200844	gene_synonym	H. sapiens	200844	H. sapiens	CFAP20DC	CFAP20 domain containing			Predicted intracellular proteins	Golgi apparatus (Approved)				0.0	0.0	0.0	0.0	0.0	0.0	0.0	0.0	0.0	0.0	0.0	0.0	0.0	0.0	0.0	0.0	0.0	0.0	0.0	0.0
PRKCD	5580	symbol	H. sapiens	5580	H. sapiens	PRKCD	protein kinase C delta	GO:1900161 regulation of phospholipid scramblase activity;GO:1900163 positive regulation of phospholipid scramblase activity;GO:2000752 regulation of glucosylceramide catabolic process	AGC Ser/Thr protein kinase family	Disease related genes; Kinases:AGC Ser/Thr protein kinases; ENZYME proteins:Transferases; Predicted intracellular proteins; Cancer-related genes:Mutational cancer driver genes; Potential drug targets; Enzymes	Cytosol (Enhanced); Additional: Endoplasmic reticulum;Golgi apparatus	13-Acetylphorbol; Ingenol mebutate; Fostamatinib	(M125)PID IGF1 PATHWAY; (M165)PID SYNDECAN 4 PATHWAY; (M275)PID ALPHA SYNUCLEIN PATHWAY	(M5941)HALLMARK UV RESPONSE UP; (M5921)HALLMARK COMPLEMENT	1.0	1.0	1.0	0.0	1.0	1.0	1.0	0.0	1.0	0.0	0.0	0.0	0.0	1.0	0.0	0.0	0.0	0.0	1.0	1.0
ZNF572	137209	symbol	H. sapiens	137209	H. sapiens	ZNF572	zinc finger protein 572	GO:0000122 negative regulation of transcription by RNA polymerase II;GO:0045892 negative regulation of transcription, DNA-templated;GO:1903507 negative regulation of nucleic acid-templated transcription		Transcription factors:Zinc-coordinating DNA-binding domains; Predicted intracellular proteins	Nuclear speckles (Approved)				0.0	0.0	0.0	0.0	0.0	0.0	0.0	0.0	0.0	0.0	0.0	0.0	0.0	0.0	0.0	0.0	0.0	0.0	0.0	0.0
ZKSCAN8	7745	symbol	H. sapiens	7745	H. sapiens	ZKSCAN8	zinc finger with KRAB and SCAN domains 8	GO:0006357 regulation of transcription by RNA polymerase II;GO:0006366 transcription by RNA polymerase II;GO:0006355 regulation of transcription, DNA-templated		Transcription factors:Zinc-coordinating DNA-binding domains; Predicted intracellular proteins	Nucleoplasm (Approved); Additional: Cytosol				0.0	0.0	0.0	0.0	0.0	0.0	0.0	0.0	0.0	0.0	0.0	0.0	0.0	0.0	0.0	0.0	0.0	0.0	0.0	0.0
DHX15	1665	symbol	H. sapiens	1665	H. sapiens	DHX15	DEAH-box helicase 15	GO:0043279 response to alkaloid;GO:0009636 response to toxic substance;GO:0008380 RNA splicing		Predicted intracellular proteins; Enzymes; ENZYME proteins:Hydrolases	Nuclear speckles (Enhanced)			(M5926)HALLMARK MYC TARGETS V1	1.0	0.0	0.0	0.0	0.0	0.0	0.0	0.0	0.0	0.0	0.0	0.0	0.0	0.0	0.0	0.0	0.0	0.0	0.0	0.0
MLLT10	8028	symbol	H. sapiens	8028	H. sapiens	MLLT10	MLLT10 histone lysine methyltransferase DOT1L cofactor	GO:0045944 positive regulation of transcription by RNA polymerase II;GO:0045893 positive regulation of transcription, DNA-templated;GO:1903508 positive regulation of nucleic acid-templated transcription		Cancer-related genes:Mutational cancer driver genes; Predicted intracellular proteins; Disease related genes	Nucleoplasm (Supported)			(M5951)HALLMARK SPERMATOGENESIS	0.0	0.0	0.0	0.0	0.0	0.0	0.0	0.0	0.0	0.0	0.0	0.0	0.0	0.0	0.0	0.0	0.0	0.0	0.0	0.0
SHE	126669	symbol	H. sapiens	126669	H. sapiens	SHE	Src homology 2 domain containing E			Predicted intracellular proteins; Predicted secreted proteins				(M5951)HALLMARK SPERMATOGENESIS; (M5947)HALLMARK IL2 STAT5 SIGNALING	0.0	0.0	0.0	0.0	0.0	0.0	0.0	0.0	0.0	0.0	0.0	0.0	0.0	0.0	0.0	0.0	0.0	0.0	0.0	0.0
C16orf70	80262	gene_synonym	H. sapiens	80262	H. sapiens	PHAF1	phagosome assembly factor 1	GO:0043001 Golgi to plasma membrane protein transport;GO:0006893 Golgi to plasma membrane transport;GO:0061951 establishment of protein localization to plasma membrane		Predicted intracellular proteins	Nuclear speckles (Approved); Additional: Cytosol;Nucleoli fibrillar center				0.0	0.0	0.0	0.0	0.0	0.0	0.0	0.0	0.0	0.0	0.0	0.0	0.0	0.0	0.0	0.0	0.0	0.0	0.0	0.0
GLCE	26035	symbol	H. sapiens	26035	H. sapiens	GLCE	glucuronic acid epimerase	GO:0030210 heparin biosynthetic process;GO:0030202 heparin metabolic process;GO:0015012 heparan sulfate proteoglycan biosynthetic process		Predicted intracellular proteins; ENZYME proteins:Isomerase; Enzymes	Mitochondria (Approved)			(M5937)HALLMARK GLYCOLYSIS	0.0	0.0	0.0	0.0	0.0	0.0	0.0	0.0	0.0	0.0	0.0	0.0	0.0	0.0	0.0	0.0	0.0	0.0	0.0	0.0
TEX261	113419	symbol	H. sapiens	113419	H. sapiens	TEX261	testis expressed 261	GO:0006888 endoplasmic reticulum to Golgi vesicle-mediated transport;GO:0048193 Golgi vesicle transport;GO:0043065 positive regulation of apoptotic process			Cytosol;Nucleoplasm (Approved)				0.0	0.0	0.0	0.0	0.0	0.0	0.0	0.0	0.0	0.0	0.0	0.0	0.0	0.0	0.0	0.0	0.0	0.0	0.0	0.0
ZDHHC6	64429	symbol	H. sapiens	64429	H. sapiens	ZDHHC6	zinc finger DHHC-type palmitoyltransferase 6	GO:0010636 positive regulation of mitochondrial fusion;GO:0010635 regulation of mitochondrial fusion;GO:0018230 peptidyl-L-cysteine S-palmitoylation		Enzymes; ENZYME proteins:Transferases					0.0	0.0	0.0	0.0	0.0	1.0	0.0	1.0	0.0	0.0	0.0	0.0	0.0	0.0	0.0	0.0	0.0	0.0	0.0	0.0
ZFC3H1	196441	symbol	H. sapiens	196441	H. sapiens	ZFC3H1	zinc finger C3H1-type containing	GO:0006396 RNA processing;GO:0016070 RNA metabolic process;GO:0090304 nucleic acid metabolic process		Predicted intracellular proteins	Nucleoplasm (Approved); Additional: Intermediate filaments				0.0	0.0	0.0	0.0	0.0	0.0	0.0	0.0	0.0	0.0	0.0	0.0	0.0	0.0	0.0	0.0	0.0	0.0	0.0	0.0
ZNF202	7753	symbol	H. sapiens	7753	H. sapiens	ZNF202	zinc finger protein 202	GO:0000122 negative regulation of transcription by RNA polymerase II;GO:0045892 negative regulation of transcription, DNA-templated;GO:1903507 negative regulation of nucleic acid-templated transcription		Transcription factors:Zinc-coordinating DNA-binding domains; Predicted intracellular proteins	Mitotic chromosome;Nucleoli rim (Approved); Additional: Nuclear bodies				0.0	0.0	0.0	0.0	0.0	0.0	0.0	0.0	0.0	0.0	0.0	0.0	0.0	0.0	0.0	0.0	0.0	0.0	0.0	0.0
DEDD	9191	symbol	H. sapiens	9191	H. sapiens	DEDD	death effector domain containing	GO:1901837 negative regulation of transcription of nucleolar large rRNA by RNA polymerase I;GO:0016479 negative regulation of transcription by RNA polymerase I;GO:1901836 regulation of transcription of nucleolar large rRNA by RNA polymerase I		Predicted intracellular proteins	Nucleoplasm (Approved)		(M19)PID P73PATHWAY		0.0	0.0	0.0	0.0	0.0	0.0	0.0	0.0	0.0	0.0	0.0	0.0	0.0	0.0	0.0	1.0	0.0	0.0	0.0	0.0
FAM206A	54942	gene_synonym	H. sapiens	54942	H. sapiens	ABITRAM	actin binding transcription modulator	GO:0051489 regulation of filopodium assembly;GO:0046847 filopodium assembly;GO:0048813 dendrite morphogenesis		Predicted intracellular proteins	Cytosol;Nucleoplasm (Supported); Additional: Cytokinetic bridge				0.0	0.0	1.0	0.0	0.0	0.0	0.0	0.0	0.0	0.0	0.0	0.0	0.0	0.0	0.0	0.0	0.0	0.0	0.0	0.0
KIAA0907	22889	gene_synonym	H. sapiens	22889	H. sapiens	KHDC4	KH domain containing 4, pre-mRNA splicing factor	GO:0006376 mRNA splice site selection;GO:0000245 spliceosomal complex assembly;GO:0022618 ribonucleoprotein complex assembly		Predicted intracellular proteins	Nucleoplasm (Supported)				1.0	0.0	0.0	0.0	0.0	0.0	0.0	0.0	0.0	0.0	0.0	0.0	0.0	0.0	0.0	0.0	0.0	0.0	0.0	0.0
SRSF11	9295	symbol	H. sapiens	9295	H. sapiens	SRSF11	serine and arginine rich splicing factor 11	GO:0008380 RNA splicing;GO:0006397 mRNA processing;GO:0016071 mRNA metabolic process		Predicted intracellular proteins	Nuclear speckles (Supported)				1.0	0.0	0.0	0.0	0.0	0.0	0.0	0.0	0.0	0.0	0.0	0.0	1.0	0.0	0.0	0.0	0.0	0.0	0.0	0.0
NUP54	53371	symbol	H. sapiens	53371	H. sapiens	NUP54	nucleoporin 54	GO:0036228 protein localization to nuclear inner membrane;GO:0090435 protein localization to nuclear envelope;GO:0006999 nuclear pore organization		Predicted intracellular proteins; Transporters:Transporter channels and pores	Nucleoplasm (Approved)				1.0	0.0	0.0	1.0	0.0	0.0	1.0	0.0	0.0	0.0	0.0	0.0	1.0	0.0	0.0	0.0	0.0	0.0	0.0	1.0
KIAA0430	9665	gene_synonym	H. sapiens	9665	H. sapiens	MARF1	meiosis regulator and mRNA stability factor 1	GO:0007143 female meiotic nuclear division;GO:0048477 oogenesis;GO:0007292 female gamete generation		Predicted intracellular proteins	Golgi apparatus;Vesicles (Approved)				0.0	1.0	0.0	0.0	0.0	0.0	0.0	0.0	0.0	0.0	0.0	0.0	0.0	0.0	0.0	1.0	0.0	1.0	0.0	0.0
MICU1	10367	symbol	H. sapiens	10367	H. sapiens	MICU1	mitochondrial calcium uptake 1	GO:1900069 regulation of cellular hyperosmotic salinity response;GO:1901000 regulation of response to salt stress;GO:0071475 cellular hyperosmotic salinity response		Transporters:Accessory Factors Involved in Transport; Potential drug targets; Disease related genes; Predicted intracellular proteins	Mitochondria (Supported)				0.0	0.0	0.0	0.0	0.0	0.0	0.0	0.0	0.0	0.0	0.0	0.0	0.0	0.0	0.0	0.0	0.0	0.0	0.0	0.0
PATL1	219988	symbol	H. sapiens	219988	H. sapiens	PATL1	PAT1 homolog 1, processing body mRNA decay factor	GO:0000290 deadenylation-dependent decapping of nuclear-transcribed mRNA;GO:0110156 methylguanosine-cap decapping;GO:0110154 RNA decapping		Predicted intracellular proteins	Cytoplasmic bodies (Supported)				1.0	0.0	0.0	0.0	1.0	0.0	0.0	0.0	1.0	0.0	0.0	0.0	0.0	0.0	1.0	0.0	0.0	0.0	0.0	0.0
SLAIN2	57606	symbol	H. sapiens	57606	H. sapiens	SLAIN2	SLAIN motif family member 2	GO:0031116 positive regulation of microtubule polymerization;GO:0007020 microtubule nucleation;GO:0031112 positive regulation of microtubule polymerization or depolymerization		Predicted intracellular proteins	Centrosome (Enhanced); Additional: Cytosol				0.0	0.0	0.0	0.0	0.0	0.0	0.0	1.0	0.0	0.0	0.0	1.0	0.0	0.0	0.0	0.0	0.0	0.0	0.0	0.0
TAF1B	9014	symbol	H. sapiens	9014	H. sapiens	TAF1B	TATA-box binding protein associated factor, RNA polymerase I subunit B	GO:0001188 RNA polymerase I preinitiation complex assembly;GO:0006361 transcription initiation from RNA polymerase I promoter;GO:0042790 nucleolar large rRNA transcription by RNA polymerase I		Predicted intracellular proteins	Nucleoli (Supported); Additional: Nucleoplasm				0.0	0.0	0.0	0.0	0.0	0.0	0.0	0.0	0.0	0.0	0.0	0.0	0.0	0.0	0.0	0.0	1.0	0.0	0.0	0.0
RALA	5898	symbol	H. sapiens	5898	H. sapiens	RALA	RAS like proto-oncogene A	GO:0051665 membrane raft localization;GO:0090141 positive regulation of mitochondrial fission;GO:0051491 positive regulation of filopodium assembly		Predicted intracellular proteins; RAS pathway related proteins	Plasma membrane (Supported); Additional: Focal adhesion sites	Guanosine-5'-Diphosphate	(M76)PID P38 ALPHA BETA PATHWAY; (M67)PID ARF6 TRAFFICKING PATHWAY; (M136)PID FOXO PATHWAY	(M5898)HALLMARK DNA REPAIR	0.0	0.0	1.0	1.0	0.0	0.0	1.0	1.0	0.0	0.0	0.0	0.0	0.0	0.0	0.0	0.0	0.0	1.0	1.0	1.0
DMTF1	9988	symbol	H. sapiens	9988	H. sapiens	DMTF1	cyclin D binding myb like transcription factor 1	GO:0045944 positive regulation of transcription by RNA polymerase II;GO:0045893 positive regulation of transcription, DNA-templated;GO:1903508 positive regulation of nucleic acid-templated transcription		Predicted intracellular proteins; Transcription factors:Helix-turn-helix domains	Nucleoplasm (Supported)		(M65)PID FRA PATHWAY; (M167)PID AP1 PATHWAY		0.0	0.0	0.0	0.0	0.0	0.0	0.0	0.0	0.0	0.0	0.0	0.0	0.0	0.0	0.0	0.0	0.0	0.0	0.0	0.0
RMI1	80010	symbol	H. sapiens	80010	H. sapiens	RMI1	RecQ mediated genome instability 1	GO:0000712 resolution of meiotic recombination intermediates;GO:0051307 meiotic chromosome separation;GO:0007131 reciprocal meiotic recombination		Predicted intracellular proteins	Nuclear bodies;Nucleoplasm (Supported)		(M1)PID FANCONI PATHWAY		0.0	1.0	0.0	1.0	0.0	0.0	0.0	0.0	0.0	0.0	0.0	0.0	0.0	1.0	0.0	0.0	0.0	1.0	0.0	0.0
TTC26	79989	symbol	H. sapiens	79989	H. sapiens	TTC26	tetratricopeptide repeat domain 26	GO:0035720 intraciliary anterograde transport;GO:1905198 manchette assembly;GO:0035735 intraciliary transport involved in cilium assembly		Predicted intracellular proteins	Cytosol;Intermediate filaments;Nuclear speckles (Approved)				0.0	0.0	1.0	0.0	0.0	0.0	0.0	0.0	0.0	0.0	0.0	1.0	1.0	0.0	0.0	1.0	0.0	0.0	0.0	0.0
RHOU	58480	symbol	H. sapiens	58480	H. sapiens	RHOU	ras homolog family member U	GO:0032488 Cdc42 protein signal transduction;GO:1903955 positive regulation of protein targeting to mitochondrion;GO:1903749 positive regulation of establishment of protein localization to mitochondrion		Predicted intracellular proteins			(M5493)WNT SIGNALING		0.0	0.0	1.0	0.0	0.0	0.0	1.0	0.0	0.0	0.0	0.0	0.0	0.0	0.0	0.0	0.0	0.0	0.0	0.0	1.0
NAA35	60560	symbol	H. sapiens	60560	H. sapiens	NAA35	N-alpha-acetyltransferase 35, NatC auxiliary subunit	GO:0017196 N-terminal peptidyl-methionine acetylation;GO:0018206 peptidyl-methionine modification;GO:0006474 N-terminal protein amino acid acetylation		Predicted intracellular proteins	Cytosol;Nucleoplasm;Plasma membrane (Approved)				0.0	0.0	0.0	0.0	0.0	1.0	0.0	0.0	0.0	0.0	0.0	0.0	0.0	0.0	0.0	0.0	0.0	0.0	0.0	0.0
PARP6	56965	symbol	H. sapiens	56965	H. sapiens	PARP6	poly(ADP-ribose) polymerase family member 6	GO:0070213 protein auto-ADP-ribosylation;GO:0140289 protein mono-ADP-ribosylation;GO:0006471 protein ADP-ribosylation		Predicted intracellular proteins; Enzymes; ENZYME proteins:Transferases	Plasma membrane (Approved)				0.0	0.0	0.0	0.0	0.0	0.0	0.0	0.0	0.0	0.0	0.0	0.0	0.0	0.0	0.0	0.0	0.0	0.0	0.0	0.0
BFAR	51283	symbol	H. sapiens	51283	H. sapiens	BFAR	bifunctional apoptosis regulator	GO:1903895 negative regulation of IRE1-mediated unfolded protein response;GO:1903894 regulation of IRE1-mediated unfolded protein response;GO:1900102 negative regulation of endoplasmic reticulum unfolded protein response		Predicted intracellular proteins					0.0	0.0	0.0	0.0	0.0	0.0	0.0	0.0	0.0	0.0	1.0	0.0	0.0	0.0	0.0	0.0	0.0	0.0	0.0	0.0
PSMG2	56984	symbol	H. sapiens	56984	H. sapiens	PSMG2	proteasome assembly chaperone 2	GO:0043248 proteasome assembly;GO:0051131 chaperone-mediated protein complex assembly;GO:0007094 mitotic spindle assembly checkpoint signaling		Predicted intracellular proteins	Nuclear bodies (Approved); Additional: Nucleoplasm				0.0	0.0	0.0	0.0	0.0	0.0	0.0	0.0	0.0	0.0	0.0	0.0	0.0	1.0	0.0	0.0	0.0	1.0	0.0	0.0
FAM162A	26355	symbol	H. sapiens	26355	H. sapiens	FAM162A	family with sequence similarity 162 member A	GO:0090200 positive regulation of release of cytochrome c from mitochondria;GO:0090199 regulation of release of cytochrome c from mitochondria;GO:0001836 release of cytochrome c from mitochondria			Cytosol;Mitochondria (Enhanced)			(M5891)HALLMARK HYPOXIA; (M5937)HALLMARK GLYCOLYSIS; (M5939)HALLMARK P53 PATHWAY	0.0	0.0	0.0	0.0	0.0	0.0	0.0	1.0	0.0	0.0	0.0	0.0	0.0	0.0	0.0	0.0	0.0	0.0	0.0	0.0
CNOT6	57472	symbol	H. sapiens	57472	H. sapiens	CNOT6	CCR4-NOT transcription complex subunit 6	GO:0070966 nuclear-transcribed mRNA catabolic process, no-go decay;GO:0010606 positive regulation of cytoplasmic mRNA processing body assembly;GO:0010603 regulation of cytoplasmic mRNA processing body assembly		Predicted intracellular proteins; Enzymes; ENZYME proteins:Hydrolases	Cytosol (Approved)			(M5922)HALLMARK UNFOLDED PROTEIN RESPONSE	1.0	0.0	0.0	0.0	1.0	0.0	0.0	1.0	1.0	0.0	0.0	0.0	0.0	0.0	1.0	0.0	0.0	0.0	0.0	0.0
DCAF12	25853	symbol	H. sapiens	25853	H. sapiens	DCAF12	DDB1 and CUL4 associated factor 12	GO:0140627 ubiquitin-dependent protein catabolic process via the C-end degron rule pathway;GO:0010506 regulation of autophagy;GO:0043161 proteasome-mediated ubiquitin-dependent protein catabolic process		Predicted intracellular proteins					0.0	0.0	0.0	0.0	0.0	0.0	0.0	0.0	0.0	0.0	1.0	0.0	0.0	0.0	0.0	0.0	0.0	0.0	0.0	0.0
RUNX1T1	862	symbol	H. sapiens	862	H. sapiens	RUNX1T1	RUNX1 partner transcriptional co-repressor 1	GO:0045599 negative regulation of fat cell differentiation;GO:0045598 regulation of fat cell differentiation;GO:0045444 fat cell differentiation		Predicted intracellular proteins; Disease related genes; Cancer-related genes	Nucleoplasm (Supported)				0.0	0.0	0.0	0.0	0.0	0.0	0.0	0.0	0.0	0.0	0.0	0.0	0.0	0.0	0.0	0.0	0.0	0.0	0.0	0.0
ADNP	23394	symbol	H. sapiens	23394	H. sapiens	ADNP	activity dependent neuroprotector homeobox	GO:0033484 nitric oxide homeostasis;GO:0010835 regulation of protein ADP-ribosylation;GO:0033483 gas homeostasis		Disease related genes; Transcription factors:Zinc-coordinating DNA-binding domains; Predicted intracellular proteins; Cancer-related genes:Mutated cancer genes; Transcription factors:Helix-turn-helix domains	Nucleoplasm (Approved)				0.0	0.0	0.0	0.0	0.0	0.0	0.0	0.0	0.0	0.0	0.0	0.0	0.0	0.0	0.0	0.0	0.0	0.0	0.0	0.0
C7orf31	136895	symbol	H. sapiens	136895	H. sapiens	C7orf31	chromosome 7 open reading frame 31			Predicted intracellular proteins	Mitochondria;Nucleoplasm (Uncertain); Additional: Cytosol				0.0	0.0	0.0	0.0	0.0	0.0	0.0	0.0	0.0	0.0	0.0	0.0	0.0	0.0	0.0	0.0	0.0	0.0	0.0	0.0
CETN2	1069	symbol	H. sapiens	1069	H. sapiens	CETN2	centrin 2	GO:0007099 centriole replication;GO:0098534 centriole assembly;GO:0006289 nucleotide-excision repair		Predicted intracellular proteins				(M5898)HALLMARK DNA REPAIR	0.0	1.0	1.0	1.0	0.0	0.0	0.0	0.0	0.0	0.0	0.0	1.0	1.0	0.0	1.0	1.0	0.0	0.0	0.0	0.0
CCP110	9738	symbol	H. sapiens	9738	H. sapiens	CCP110	centriolar coiled-coil protein 110	GO:1903723 negative regulation of centriole elongation;GO:0032053 ciliary basal body organization;GO:1903722 regulation of centriole elongation		Predicted intracellular proteins	Centrosome (Supported)			(M5925)HALLMARK E2F TARGETS; (M5939)HALLMARK P53 PATHWAY	0.0	0.0	1.0	1.0	0.0	0.0	0.0	1.0	0.0	0.0	0.0	1.0	0.0	0.0	1.0	0.0	0.0	0.0	0.0	0.0
TCTN3	26123	symbol	H. sapiens	26123	H. sapiens	TCTN3	tectonic family member 3	GO:0007224 smoothened signaling pathway;GO:0060271 cilium assembly;GO:0044782 cilium organization		Predicted intracellular proteins; Disease related genes	Microtubules (Approved)				0.0	0.0	1.0	0.0	0.0	0.0	0.0	0.0	0.0	0.0	0.0	0.0	0.0	0.0	0.0	0.0	0.0	0.0	0.0	0.0
LINS	55180	gene_synonym	H. sapiens	55180	H. sapiens	LINS1	lines homolog 1	GO:0050890 cognition;GO:0050877 nervous system process;GO:0003008 system process		Predicted intracellular proteins; Disease related genes	Nucleoplasm (Approved)				0.0	0.0	0.0	0.0	0.0	0.0	0.0	0.0	0.0	0.0	0.0	0.0	0.0	0.0	0.0	0.0	0.0	0.0	0.0	0.0
RAD50	10111	symbol	H. sapiens	10111	H. sapiens	RAD50	RAD50 double strand break repair protein	GO:0031860 telomeric 3' overhang formation;GO:0000019 regulation of mitotic recombination;GO:1904354 negative regulation of telomere capping		Predicted intracellular proteins; Disease related genes	Nucleoplasm (Supported)		(M258)PID BARD1 PATHWAY; (M84)PID ATM PATHWAY; (M1)PID FANCONI PATHWAY	(M5925)HALLMARK E2F TARGETS	0.0	1.0	1.0	1.0	0.0	0.0	0.0	1.0	0.0	0.0	0.0	0.0	0.0	1.0	0.0	0.0	0.0	1.0	0.0	0.0
LARP7	51574	symbol	H. sapiens	51574	H. sapiens	LARP7	La ribonucleoprotein 7, transcriptional regulator	GO:0106349 snRNA methylation;GO:1990437 snRNA 2'-O-methylation;GO:1990438 U6 2'-O-snRNA methylation		Predicted intracellular proteins; Disease related genes	Cytosol;Nucleoplasm (Supported)				1.0	0.0	0.0	0.0	1.0	0.0	1.0	0.0	0.0	1.0	0.0	0.0	0.0	0.0	0.0	1.0	0.0	0.0	0.0	0.0
HFE	3077	symbol	H. sapiens	3077	H. sapiens	HFE	homeostatic iron regulator	GO:0002626 negative regulation of T cell antigen processing and presentation;GO:0010106 cellular response to iron ion starvation;GO:1904282 regulation of antigen processing and presentation of endogenous peptide antigen via MHC class I		Disease related genes	Plasma membrane (Supported); Additional: Nucleoplasm				0.0	0.0	0.0	0.0	0.0	0.0	1.0	0.0	0.0	0.0	1.0	0.0	0.0	0.0	0.0	0.0	0.0	0.0	0.0	0.0
BLZF1	8548	symbol	H. sapiens	8548	H. sapiens	BLZF1	basic leucine zipper nuclear factor 1	GO:0043001 Golgi to plasma membrane protein transport;GO:0006893 Golgi to plasma membrane transport;GO:0061951 establishment of protein localization to plasma membrane		Predicted intracellular proteins	Golgi apparatus (Supported); Additional: Nucleoplasm				0.0	0.0	0.0	1.0	0.0	0.0	0.0	0.0	0.0	0.0	0.0	0.0	0.0	0.0	0.0	0.0	0.0	0.0	0.0	0.0
VAMP4	8674	symbol	H. sapiens	8674	H. sapiens	VAMP4	vesicle associated membrane protein 4	GO:0016189 synaptic vesicle to endosome fusion;GO:0099532 synaptic vesicle endosomal processing;GO:0090161 Golgi ribbon formation			Golgi apparatus (Approved)			(M5910)HALLMARK PROTEIN SECRETION	0.0	0.0	0.0	0.0	0.0	0.0	0.0	0.0	0.0	0.0	0.0	1.0	0.0	0.0	0.0	0.0	0.0	0.0	0.0	0.0
SYNCRIP	10492	symbol	H. sapiens	10492	H. sapiens	SYNCRIP	synaptotagmin binding cytoplasmic RNA interacting protein	GO:0070934 CRD-mediated mRNA stabilization;GO:0048255 mRNA stabilization;GO:1902373 negative regulation of mRNA catabolic process		Predicted intracellular proteins	Nucleoplasm (Approved); Additional: Cytosol;Vesicles			(M5901)HALLMARK G2M CHECKPOINT; (M5925)HALLMARK E2F TARGETS; (M5926)HALLMARK MYC TARGETS V1	1.0	0.0	0.0	0.0	1.0	0.0	0.0	0.0	1.0	0.0	0.0	0.0	0.0	0.0	0.0	0.0	0.0	0.0	0.0	0.0
POGZ	23126	symbol	H. sapiens	23126	H. sapiens	POGZ	pogo transposable element derived with ZNF domain	GO:0051382 kinetochore assembly;GO:0051383 kinetochore organization;GO:0007064 mitotic sister chromatid cohesion		Transcription factors:Zinc-coordinating DNA-binding domains; Predicted intracellular proteins; Disease related genes	Nucleoplasm (Enhanced)				0.0	0.0	0.0	1.0	0.0	0.0	0.0	0.0	0.0	0.0	0.0	0.0	0.0	0.0	1.0	0.0	0.0	1.0	0.0	0.0
C2CD3	26005	symbol	H. sapiens	26005	H. sapiens	C2CD3	C2 domain containing 3 centriole elongation regulator	GO:0021997 neural plate axis specification;GO:0060896 neural plate pattern specification;GO:0061511 centriole elongation		Predicted intracellular proteins; Disease related genes	Centriolar satellite;Nucleoplasm (Approved)				0.0	0.0	1.0	0.0	0.0	0.0	0.0	0.0	0.0	0.0	0.0	1.0	0.0	0.0	1.0	0.0	0.0	0.0	0.0	0.0
APPL2	55198	symbol	H. sapiens	55198	H. sapiens	APPL2	adaptor protein, phosphotyrosine interacting with PH domain and leucine zipper 2	GO:1905303 positive regulation of macropinocytosis;GO:0009631 cold acclimation;GO:1905301 regulation of macropinocytosis		Predicted intracellular proteins; Disease related genes					0.0	0.0	0.0	0.0	0.0	0.0	1.0	0.0	0.0	0.0	0.0	0.0	0.0	0.0	0.0	0.0	0.0	0.0	0.0	0.0
KDELC2	143888	gene_synonym	H. sapiens	143888	H. sapiens	POGLUT3	protein O-glucosyltransferase 3	GO:0018242 protein O-linked glycosylation via serine;GO:0006493 protein O-linked glycosylation;GO:0006486 protein glycosylation		Predicted intracellular proteins	Nucleoplasm (Approved); Additional: Vesicles				0.0	0.0	0.0	0.0	0.0	0.0	0.0	0.0	0.0	0.0	0.0	0.0	0.0	0.0	0.0	0.0	0.0	0.0	0.0	0.0
RFX8	731220	symbol	H. sapiens	731220	H. sapiens	RFX8	regulatory factor X8	GO:0006357 regulation of transcription by RNA polymerase II;GO:0006366 transcription by RNA polymerase II;GO:0006355 regulation of transcription, DNA-templated		Predicted intracellular proteins; Transcription factors:Helix-turn-helix domains	Nucleoplasm (Approved); Additional: Nuclear bodies				0.0	0.0	0.0	0.0	0.0	0.0	0.0	0.0	0.0	0.0	0.0	0.0	0.0	0.0	0.0	0.0	0.0	0.0	0.0	0.0
FKTN	2218	symbol	H. sapiens	2218	H. sapiens	FKTN	fukutin	GO:0060049 regulation of protein glycosylation;GO:0035269 protein O-linked mannosylation;GO:0035268 protein mannosylation		Predicted intracellular proteins; Disease related genes					0.0	0.0	0.0	0.0	0.0	0.0	0.0	0.0	0.0	0.0	0.0	0.0	0.0	0.0	0.0	0.0	0.0	0.0	0.0	0.0
BTG3	10950	symbol	H. sapiens	10950	H. sapiens	BTG3	BTG anti-proliferation factor 3	GO:0045930 negative regulation of mitotic cell cycle;GO:0045786 negative regulation of cell cycle;GO:0007346 regulation of mitotic cell cycle		Predicted intracellular proteins				(M5941)HALLMARK UV RESPONSE UP; (M5902)HALLMARK APOPTOSIS; (M5890)HALLMARK TNFA SIGNALING VIA NFKB	0.0	0.0	0.0	0.0	0.0	0.0	0.0	0.0	1.0	0.0	0.0	0.0	0.0	0.0	0.0	0.0	0.0	0.0	0.0	0.0
POT1	25913	symbol	H. sapiens	25913	H. sapiens	POT1	protection of telomeres 1	GO:0060383 positive regulation of DNA strand elongation;GO:0060382 regulation of DNA strand elongation;GO:1905464 positive regulation of DNA duplex unwinding		Predicted intracellular proteins; Disease related genes; Cancer-related genes	Nucleoplasm (Supported)		(M105)PID TELOMERASE PATHWAY		0.0	1.0	0.0	1.0	0.0	0.0	1.0	1.0	0.0	0.0	0.0	0.0	0.0	1.0	0.0	0.0	0.0	0.0	0.0	0.0
LOC105375734	105375734	Gene_ID	H. sapiens	105375734	H. sapiens	SMILR	smooth muscle induced lncRNA, enhancer of proliferation								0.0	0.0	0.0	0.0	0.0	0.0	0.0	0.0	0.0	0.0	0.0	0.0	0.0	0.0	0.0	0.0	0.0	0.0	0.0	0.0
PRIMA1	145270	symbol	H. sapiens	145270	H. sapiens	PRIMA1	proline rich membrane anchor 1	GO:0042135 neurotransmitter catabolic process;GO:0042133 neurotransmitter metabolic process;GO:0001505 regulation of neurotransmitter levels			Plasma membrane (Approved); Additional: Cytosol;Nucleoli				0.0	0.0	0.0	0.0	0.0	0.0	0.0	0.0	0.0	0.0	0.0	0.0	0.0	0.0	0.0	0.0	0.0	0.0	0.0	0.0
TPP1	1200	symbol	H. sapiens	1200	H. sapiens	TPP1	tripeptidyl peptidase 1	GO:1905146 lysosomal protein catabolic process;GO:0007039 protein catabolic process in the vacuole;GO:0070198 protein localization to chromosome, telomeric region		Disease related genes; Predicted intracellular proteins; Potential drug targets; ENZYME proteins:Hydrolases; Enzymes					0.0	0.0	0.0	0.0	0.0	0.0	0.0	0.0	0.0	0.0	0.0	0.0	0.0	0.0	0.0	0.0	0.0	0.0	0.0	0.0
SPAG4	6676	symbol	H. sapiens	6676	H. sapiens	SPAG4	sperm associated antigen 4	GO:0006998 nuclear envelope organization;GO:0006997 nucleus organization;GO:0010256 endomembrane system organization		Predicted intracellular proteins				(M5937)HALLMARK GLYCOLYSIS	0.0	0.0	0.0	0.0	0.0	0.0	0.0	0.0	0.0	0.0	0.0	0.0	0.0	0.0	0.0	1.0	0.0	0.0	0.0	0.0
SCAF11	9169	symbol	H. sapiens	9169	H. sapiens	SCAF11	SR-related CTD associated factor 11	GO:0000245 spliceosomal complex assembly;GO:0022618 ribonucleoprotein complex assembly;GO:0071826 ribonucleoprotein complex subunit organization		Predicted intracellular proteins	Nucleoplasm (Enhanced); Additional: Nuclear bodies				1.0	0.0	0.0	0.0	0.0	0.0	0.0	0.0	0.0	0.0	0.0	0.0	0.0	0.0	0.0	0.0	0.0	0.0	0.0	0.0
FKBP15	23307	symbol	H. sapiens	23307	H. sapiens	FKBP15	FKBP prolyl isomerase family member 15	GO:0000413 protein peptidyl-prolyl isomerization;GO:0018208 peptidyl-proline modification;GO:0006897 endocytosis		Predicted intracellular proteins	Nucleoli (Approved); Additional: Cytosol				0.0	0.0	0.0	0.0	0.0	0.0	0.0	0.0	0.0	0.0	0.0	0.0	0.0	0.0	0.0	0.0	0.0	0.0	0.0	0.0
CCAR1	55749	symbol	H. sapiens	55749	H. sapiens	CCAR1	cell division cycle and apoptosis regulator 1	GO:0043065 positive regulation of apoptotic process;GO:0043068 positive regulation of programmed cell death;GO:0030335 positive regulation of cell migration		Cancer-related genes:Mutational cancer driver genes; Predicted intracellular proteins	Nucleoplasm (Supported); Additional: Golgi apparatus				1.0	0.0	0.0	0.0	0.0	0.0	0.0	0.0	0.0	0.0	0.0	0.0	0.0	0.0	0.0	0.0	0.0	0.0	0.0	0.0
CLIC2	1193	symbol	H. sapiens	1193	H. sapiens	CLIC2	chloride intracellular channel 2	GO:0060315 negative regulation of ryanodine-sensitive calcium-release channel activity;GO:0051280 negative regulation of release of sequestered calcium ion into cytosol;GO:0051284 positive regulation of sequestering of calcium ion		Potential drug targets; Disease related genes; Transporters:Transporter channels and pores; Predicted intracellular proteins	Cytosol;Plasma membrane (Supported); Additional: Nucleoplasm			(M5945)HALLMARK HEME METABOLISM	0.0	0.0	0.0	0.0	0.0	0.0	0.0	0.0	0.0	0.0	0.0	0.0	0.0	0.0	0.0	0.0	0.0	0.0	0.0	0.0
ZNF662	389114	symbol	H. sapiens	389114	H. sapiens	ZNF662	zinc finger protein 662	GO:0006357 regulation of transcription by RNA polymerase II;GO:0006366 transcription by RNA polymerase II;GO:0006355 regulation of transcription, DNA-templated		Transcription factors:Zinc-coordinating DNA-binding domains; Predicted intracellular proteins					0.0	0.0	0.0	0.0	0.0	0.0	0.0	0.0	0.0	0.0	0.0	0.0	0.0	0.0	0.0	0.0	0.0	0.0	0.0	0.0
DDX42	11325	symbol	H. sapiens	11325	H. sapiens	DDX42	DEAD-box helicase 42	GO:0042981 regulation of apoptotic process;GO:0043067 regulation of programmed cell death;GO:0010941 regulation of cell death		Predicted intracellular proteins; Enzymes; ENZYME proteins:Hydrolases	Nuclear speckles (Enhanced)				1.0	0.0	0.0	0.0	0.0	0.0	0.0	0.0	0.0	0.0	0.0	0.0	0.0	0.0	0.0	0.0	0.0	0.0	0.0	0.0
NOSTRIN	115677	symbol	H. sapiens	115677	H. sapiens	NOSTRIN	nitric oxide synthase trafficking	GO:0006897 endocytosis;GO:0045892 negative regulation of transcription, DNA-templated;GO:1903507 negative regulation of nucleic acid-templated transcription		Predicted intracellular proteins	Cytosol (Approved); Additional: Vesicles				0.0	0.0	0.0	0.0	0.0	0.0	0.0	0.0	0.0	0.0	0.0	0.0	0.0	0.0	0.0	0.0	0.0	0.0	0.0	0.0
LMLN	89782	symbol	H. sapiens	89782	H. sapiens	LMLN	leishmanolysin like peptidase	GO:0051301 cell division;GO:0007155 cell adhesion;GO:0022610 biological adhesion		Predicted intracellular proteins; Peptidases:Metallopeptidases; Enzymes	Cytosol (Supported); Additional: Focal adhesion sites				0.0	0.0	0.0	1.0	0.0	0.0	0.0	0.0	0.0	0.0	0.0	0.0	0.0	0.0	0.0	0.0	0.0	0.0	0.0	0.0
CCDC14	64770	symbol	H. sapiens	64770	H. sapiens	CCDC14	coiled-coil domain containing 14	GO:0071539 protein localization to centrosome;GO:1905508 protein localization to microtubule organizing center;GO:0021762 substantia nigra development		Predicted intracellular proteins	Centrosome (Enhanced)				0.0	0.0	0.0	0.0	0.0	0.0	0.0	0.0	0.0	0.0	0.0	0.0	0.0	0.0	0.0	0.0	0.0	0.0	0.0	0.0
ZBTB5	9925	symbol	H. sapiens	9925	H. sapiens	ZBTB5	zinc finger and BTB domain containing 5	GO:0000122 negative regulation of transcription by RNA polymerase II;GO:0045892 negative regulation of transcription, DNA-templated;GO:1903507 negative regulation of nucleic acid-templated transcription		Transcription factors:Zinc-coordinating DNA-binding domains; Predicted intracellular proteins	Nuclear bodies;Nucleoplasm (Approved); Additional: Golgi apparatus				0.0	0.0	0.0	0.0	0.0	0.0	0.0	0.0	0.0	0.0	0.0	0.0	0.0	0.0	0.0	0.0	0.0	0.0	0.0	0.0
PAPOLA	10914	symbol	H. sapiens	10914	H. sapiens	PAPOLA	poly(A) polymerase alpha	GO:0031440 regulation of mRNA 3'-end processing;GO:0006378 mRNA polyadenylation;GO:0043631 RNA polyadenylation		Predicted intracellular proteins; Enzymes; ENZYME proteins:Transferases	Nucleoplasm (Supported)	Cordycepin Triphosphate; 3-sulfino-L-alanine; Triphosphoric acid			1.0	0.0	0.0	0.0	1.0	0.0	0.0	0.0	0.0	0.0	0.0	0.0	0.0	0.0	0.0	0.0	0.0	0.0	0.0	0.0
ZNF704	619279	symbol	H. sapiens	619279	H. sapiens	ZNF704	zinc finger protein 704	GO:0006357 regulation of transcription by RNA polymerase II;GO:0006366 transcription by RNA polymerase II;GO:0006355 regulation of transcription, DNA-templated		Predicted intracellular proteins	Nucleoplasm (Approved)				0.0	0.0	0.0	0.0	0.0	0.0	0.0	0.0	0.0	0.0	0.0	0.0	0.0	0.0	0.0	0.0	0.0	0.0	0.0	0.0
TCEANC2	127428	symbol	H. sapiens	127428	H. sapiens	TCEANC2	transcription elongation factor A N-terminal and central domain containing 2	GO:0006351 transcription, DNA-templated;GO:0097659 nucleic acid-templated transcription;GO:0032774 RNA biosynthetic process		Predicted intracellular proteins	Nucleoplasm (Approved); Additional: Vesicles				0.0	0.0	0.0	0.0	0.0	0.0	0.0	0.0	0.0	0.0	0.0	0.0	0.0	0.0	0.0	0.0	0.0	0.0	0.0	0.0
ALG6	29929	symbol	H. sapiens	29929	H. sapiens	ALG6	ALG6 alpha-1,3-glucosyltransferase	GO:0006488 dolichol-linked oligosaccharide biosynthetic process;GO:0006490 oligosaccharide-lipid intermediate biosynthetic process;GO:0006487 protein N-linked glycosylation		Potential drug targets; Disease related genes; Enzymes; ENZYME proteins:Transferases	Endoplasmic reticulum (Approved)				0.0	0.0	0.0	0.0	0.0	0.0	0.0	0.0	0.0	0.0	0.0	0.0	0.0	0.0	0.0	0.0	0.0	0.0	0.0	0.0
TPGS2	25941	symbol	H. sapiens	25941	H. sapiens	TPGS2	tubulin polyglutamylase complex subunit 2	GO:0018095 protein polyglutamylation;GO:0018200 peptidyl-glutamic acid modification;GO:0018193 peptidyl-amino acid modification		Predicted intracellular proteins					0.0	0.0	0.0	0.0	0.0	0.0	0.0	0.0	0.0	0.0	0.0	0.0	0.0	0.0	0.0	0.0	0.0	0.0	0.0	0.0
SGCB	6443	symbol	H. sapiens	6443	H. sapiens	SGCB	sarcoglycan beta	GO:0097084 vascular associated smooth muscle cell development;GO:0035886 vascular associated smooth muscle cell differentiation;GO:0051145 smooth muscle cell differentiation		Disease related genes	Cytosol (Approved)			(M5930)HALLMARK EPITHELIAL MESENCHYMAL TRANSITION	0.0	0.0	0.0	0.0	0.0	0.0	0.0	0.0	0.0	0.0	0.0	0.0	0.0	0.0	0.0	0.0	0.0	0.0	0.0	0.0
FBXO36	130888	symbol	H. sapiens	130888	H. sapiens	FBXO36	F-box protein 36			Predicted intracellular proteins	Nucleoli;Nucleoplasm (Approved)				0.0	0.0	0.0	0.0	0.0	0.0	0.0	0.0	0.0	0.0	0.0	0.0	0.0	0.0	0.0	0.0	0.0	0.0	0.0	0.0
GTF3C3	9330	symbol	H. sapiens	9330	H. sapiens	GTF3C3	general transcription factor IIIC subunit 3	GO:0042791 5S class rRNA transcription by RNA polymerase III;GO:0042797 tRNA transcription by RNA polymerase III;GO:0009304 tRNA transcription		Predicted intracellular proteins	Nuclear membrane;Nucleoplasm (Supported)				0.0	0.0	0.0	0.0	0.0	0.0	0.0	0.0	0.0	0.0	0.0	0.0	0.0	0.0	0.0	0.0	0.0	0.0	0.0	0.0
TMEM131	23505	symbol	H. sapiens	23505	H. sapiens	TMEM131	transmembrane protein 131	GO:0008150 biological_process		Predicted intracellular proteins	Intermediate filaments;Vesicles (Uncertain)				0.0	0.0	0.0	0.0	0.0	0.0	0.0	0.0	0.0	0.0	0.0	0.0	0.0	0.0	0.0	0.0	0.0	0.0	0.0	0.0
IL17RD	54756	symbol	H. sapiens	54756	H. sapiens	IL17RD	interleukin 17 receptor D	GO:0010719 negative regulation of epithelial to mesenchymal transition;GO:0030512 negative regulation of transforming growth factor beta receptor signaling pathway;GO:0010717 regulation of epithelial to mesenchymal transition		Predicted intracellular proteins; Disease related genes	Golgi apparatus (Supported); Additional: Nucleoplasm		(M276)PID FGF PATHWAY		0.0	0.0	0.0	0.0	0.0	0.0	0.0	0.0	0.0	0.0	0.0	0.0	0.0	0.0	0.0	0.0	0.0	0.0	0.0	0.0
SWT1	54823	symbol	H. sapiens	54823	H. sapiens	SWT1	SWT1 RNA endoribonuclease homolog			Predicted intracellular proteins	Cytosol (Approved)				0.0	0.0	0.0	0.0	0.0	0.0	0.0	0.0	0.0	0.0	0.0	0.0	0.0	0.0	0.0	0.0	0.0	0.0	0.0	0.0
PALB2	79728	symbol	H. sapiens	79728	H. sapiens	PALB2	partner and localizer of BRCA2	GO:0001833 inner cell mass cell proliferation;GO:0036342 post-anal tail morphogenesis;GO:0001832 blastocyst growth		Predicted intracellular proteins; Disease related genes; Cancer-related genes	Nucleoplasm (Supported)		(M1)PID FANCONI PATHWAY		0.0	1.0	0.0	0.0	0.0	0.0	0.0	0.0	0.0	0.0	0.0	0.0	0.0	1.0	0.0	0.0	0.0	0.0	0.0	0.0
PTPN12	5782	symbol	H. sapiens	5782	H. sapiens	PTPN12	protein tyrosine phosphatase non-receptor type 12	GO:2000587 negative regulation of platelet-derived growth factor receptor-beta signaling pathway;GO:2000586 regulation of platelet-derived growth factor receptor-beta signaling pathway;GO:0010642 negative regulation of platelet-derived growth factor receptor signaling pathway		Predicted intracellular proteins; Enzymes; ENZYME proteins:Hydrolases	Cytosol;Plasma membrane (Approved)	Tiludronic acid			0.0	0.0	0.0	0.0	0.0	0.0	0.0	0.0	0.0	0.0	0.0	0.0	0.0	0.0	0.0	0.0	0.0	0.0	1.0	1.0
WISP2	8839	gene_synonym	H. sapiens	8839	H. sapiens	CCN5	cellular communication network factor 5	GO:0060548 negative regulation of cell death;GO:0007155 cell adhesion;GO:0022610 biological adhesion		Predicted secreted proteins			(M3008)NABA ECM GLYCOPROTEINS; (M5884)NABA CORE MATRISOME; (M5889)NABA MATRISOME	(M5891)HALLMARK HYPOXIA; (M5906)HALLMARK ESTROGEN RESPONSE EARLY; (M5907)HALLMARK ESTROGEN RESPONSE LATE	0.0	0.0	0.0	0.0	0.0	0.0	0.0	0.0	0.0	0.0	0.0	0.0	0.0	0.0	0.0	0.0	0.0	0.0	0.0	0.0
PAM	5066	symbol	H. sapiens	5066	H. sapiens	PAM	peptidylglycine alpha-amidating monooxygenase	GO:0018032 protein amidation;GO:0062112 fatty acid primary amide biosynthetic process;GO:0062126 fatty acid primary amide metabolic process		ENZYME proteins:Lyases; Predicted intracellular proteins; ENZYME proteins:Oxidoreductases; Predicted secreted proteins; Enzymes	Cytosol;Golgi apparatus (Approved)	Ascorbic acid; N-Alpha-Acetyl-3,5-Diiodotyrosylglycine; N-alpha-Acetyl-3,5-diiodotyrosyl-D-threonine		(M5910)HALLMARK PROTEIN SECRETION; (M5891)HALLMARK HYPOXIA; (M5937)HALLMARK GLYCOLYSIS	0.0	0.0	0.0	0.0	0.0	0.0	0.0	0.0	0.0	0.0	0.0	0.0	0.0	0.0	0.0	0.0	0.0	0.0	0.0	0.0
PARP11	57097	symbol	H. sapiens	57097	H. sapiens	PARP11	poly(ADP-ribose) polymerase family member 11	GO:0070213 protein auto-ADP-ribosylation;GO:0140289 protein mono-ADP-ribosylation;GO:0006471 protein ADP-ribosylation		Predicted intracellular proteins; Enzymes; ENZYME proteins:Transferases	Nuclear bodies (Supported); Additional: Cytosol;Nucleoplasm				0.0	0.0	0.0	0.0	0.0	0.0	0.0	0.0	0.0	0.0	0.0	0.0	1.0	0.0	0.0	1.0	0.0	0.0	0.0	0.0
KIAA1407	57577	gene_synonym	H. sapiens	57577	H. sapiens	CCDC191	coiled-coil domain containing 191			Predicted intracellular proteins	Mitochondria (Approved)				0.0	0.0	0.0	0.0	0.0	0.0	0.0	0.0	0.0	0.0	0.0	0.0	0.0	0.0	0.0	0.0	0.0	0.0	0.0	0.0
RPGR	6103	symbol	H. sapiens	6103	H. sapiens	RPGR	retinitis pigmentosa GTPase regulator	GO:0042073 intraciliary transport;GO:0010970 transport along microtubule;GO:0099111 microtubule-based transport		Cancer-related genes:Mutational cancer driver genes; Predicted intracellular proteins; Disease related genes	Golgi apparatus (Supported)				0.0	0.0	1.0	0.0	0.0	0.0	0.0	0.0	0.0	0.0	0.0	0.0	1.0	0.0	0.0	0.0	0.0	0.0	0.0	0.0
VPS45	11311	symbol	H. sapiens	11311	H. sapiens	VPS45	vacuolar protein sorting 45 homolog	GO:0006886 intracellular protein transport;GO:0046907 intracellular transport;GO:0016192 vesicle-mediated transport		Predicted intracellular proteins; Disease related genes	Microtubules (Approved)			(M5910)HALLMARK PROTEIN SECRETION	0.0	0.0	0.0	0.0	0.0	0.0	0.0	0.0	0.0	0.0	0.0	0.0	0.0	0.0	0.0	0.0	0.0	0.0	0.0	0.0
EXOC1	55763	symbol	H. sapiens	55763	H. sapiens	EXOC1	exocyst complex component 1	GO:0006893 Golgi to plasma membrane transport;GO:0006892 post-Golgi vesicle-mediated transport;GO:0050714 positive regulation of protein secretion		Predicted intracellular proteins; Transporters:Transporter channels and pores	Plasma membrane (Approved); Additional: Cytosol;Microtubules		(M16)PID INSULIN PATHWAY; (M67)PID ARF6 TRAFFICKING PATHWAY		0.0	0.0	1.0	0.0	0.0	0.0	0.0	0.0	0.0	0.0	0.0	0.0	0.0	0.0	0.0	0.0	0.0	0.0	0.0	0.0
FGF9	2254	symbol	H. sapiens	2254	H. sapiens	FGF9	fibroblast growth factor 9	GO:1900240 negative regulation of phenotypic switching;GO:1905916 negative regulation of cell differentiation involved in phenotypic switching;GO:1905931 negative regulation of vascular associated smooth muscle cell differentiation involved in phenotypic switching		Disease related genes; Predicted intracellular proteins; RAS pathway related proteins; Cancer-related genes:Candidate cancer biomarkers; Predicted secreted proteins			(M276)PID FGF PATHWAY; (M5883)NABA SECRETED FACTORS; (M5885)NABA MATRISOME ASSOCIATED	(M5953)HALLMARK KRAS SIGNALING UP	0.0	0.0	0.0	1.0	0.0	0.0	0.0	0.0	0.0	0.0	0.0	0.0	0.0	0.0	0.0	0.0	0.0	0.0	1.0	0.0
POLR2B	5431	symbol	H. sapiens	5431	H. sapiens	POLR2B	RNA polymerase II subunit B	GO:0006366 transcription by RNA polymerase II;GO:0006351 transcription, DNA-templated;GO:0097659 nucleic acid-templated transcription		RNA polymerase related proteins; Predicted intracellular proteins; Enzymes; ENZYME proteins:Transferases	Nucleoplasm (Supported)				1.0	1.0	0.0	1.0	0.0	0.0	0.0	0.0	0.0	0.0	0.0	0.0	0.0	1.0	0.0	0.0	0.0	0.0	1.0	0.0
MAPK9	5601	symbol	H. sapiens	5601	H. sapiens	MAPK9	mitogen-activated protein kinase 9	GO:0061833 protein localization to tricellular tight junction;GO:1901483 regulation of transcription factor catabolic process;GO:1901485 positive regulation of transcription factor catabolic process	CMGC Ser/Thr protein kinase family	ENZYME proteins:Transferases; Kinases:CMGC Ser/Thr protein kinases; Predicted intracellular proteins; RAS pathway related proteins; Enzymes		N-{3-[5-(1H-1,2,4-triazol-3-yl)-1H-indazol-3-yl]phenyl}furan-2-carboxamide; Fostamatinib	(M45)PID CD40 PATHWAY; (M193)PID NEPHRIN NEPH1 PATHWAY; (M23)PID WNT NONCANONICAL PATHWAY	(M5923)HALLMARK PI3K AKT MTOR SIGNALING	0.0	0.0	0.0	0.0	0.0	0.0	0.0	1.0	1.0	0.0	1.0	0.0	0.0	0.0	1.0	0.0	0.0	0.0	1.0	1.0
DLST	1743	symbol	H. sapiens	1743	H. sapiens	DLST	dihydrolipoamide S-succinyltransferase	GO:0033512 L-lysine catabolic process to acetyl-CoA via saccharopine;GO:0018335 protein succinylation;GO:0106077 histone succinylation		Predicted intracellular proteins; Enzymes; Citric acid cycle related proteins; ENZYME proteins:Transferases	Mitochondria;Nucleoplasm (Approved)			(M5935)HALLMARK FATTY ACID METABOLISM; (M5936)HALLMARK OXIDATIVE PHOSPHORYLATION	0.0	0.0	0.0	0.0	0.0	1.0	0.0	0.0	0.0	0.0	0.0	0.0	0.0	0.0	0.0	0.0	0.0	0.0	0.0	0.0
PPP1R36	145376	symbol	H. sapiens	145376	H. sapiens	PPP1R36	protein phosphatase 1 regulatory subunit 36	GO:0010923 negative regulation of phosphatase activity;GO:0035305 negative regulation of dephosphorylation;GO:0010921 regulation of phosphatase activity		Predicted intracellular proteins					0.0	0.0	0.0	0.0	0.0	0.0	0.0	0.0	0.0	0.0	0.0	0.0	0.0	0.0	0.0	0.0	0.0	0.0	0.0	0.0
CEP290	80184	symbol	H. sapiens	80184	H. sapiens	CEP290	centrosomal protein 290	GO:0097711 ciliary basal body-plasma membrane docking;GO:1905349 ciliary transition zone assembly;GO:0030916 otic vesicle formation		Predicted intracellular proteins; Disease related genes	Centrosome (Supported)				0.0	0.0	1.0	1.0	0.0	0.0	1.0	0.0	0.0	0.0	0.0	0.0	0.0	0.0	0.0	0.0	0.0	0.0	0.0	0.0
TAF1A	9015	symbol	H. sapiens	9015	H. sapiens	TAF1A	TATA-box binding protein associated factor, RNA polymerase I subunit A	GO:0006360 transcription by RNA polymerase I;GO:0006366 transcription by RNA polymerase II;GO:0006351 transcription, DNA-templated		Predicted intracellular proteins	Nucleoplasm (Supported)				0.0	0.0	0.0	0.0	0.0	0.0	0.0	0.0	0.0	0.0	0.0	0.0	0.0	0.0	0.0	0.0	0.0	0.0	0.0	0.0
LINC00954	400946	symbol	H. sapiens	400946	H. sapiens	LINC00954	long intergenic non-protein coding RNA 954								0.0	0.0	0.0	0.0	0.0	0.0	0.0	0.0	0.0	0.0	0.0	0.0	0.0	0.0	0.0	0.0	0.0	0.0	0.0	0.0
TSPAN6	7105	symbol	H. sapiens	7105	H. sapiens	TSPAN6	tetraspanin 6	GO:0039532 negative regulation of viral-induced cytoplasmic pattern recognition receptor signaling pathway;GO:0039531 regulation of viral-induced cytoplasmic pattern recognition receptor signaling pathway;GO:0050687 negative regulation of defense response to virus		Predicted intracellular proteins	Cell Junctions;Cytosol (Approved); Additional: Nucleoli fibrillar center				0.0	0.0	0.0	0.0	0.0	0.0	0.0	0.0	0.0	0.0	0.0	0.0	0.0	0.0	0.0	0.0	0.0	0.0	0.0	0.0
PDS5B	23047	symbol	H. sapiens	23047	H. sapiens	PDS5B	PDS5 cohesin associated factor B	GO:0007064 mitotic sister chromatid cohesion;GO:0007062 sister chromatid cohesion;GO:0000070 mitotic sister chromatid segregation		Predicted intracellular proteins	Nucleoplasm (Enhanced)			(M5901)HALLMARK G2M CHECKPOINT; (M5925)HALLMARK E2F TARGETS	0.0	1.0	0.0	1.0	0.0	0.0	0.0	0.0	0.0	0.0	0.0	0.0	0.0	0.0	0.0	0.0	0.0	1.0	0.0	0.0
FAM13B	51306	symbol	H. sapiens	51306	H. sapiens	FAM13B	family with sequence similarity 13 member B	GO:0051056 regulation of small GTPase mediated signal transduction;GO:0007264 small GTPase mediated signal transduction;GO:1902531 regulation of intracellular signal transduction		Predicted intracellular proteins	Nucleoplasm (Approved)				0.0	0.0	0.0	0.0	0.0	0.0	0.0	0.0	0.0	0.0	0.0	0.0	0.0	0.0	0.0	0.0	0.0	0.0	0.0	0.0
MTERF3	51001	symbol	H. sapiens	51001	H. sapiens	MTERF3	mitochondrial transcription termination factor 3	GO:0061668 mitochondrial ribosome assembly;GO:0042255 ribosome assembly;GO:0042254 ribosome biogenesis		Predicted intracellular proteins	Mitochondria (Supported); Additional: Cytosol				0.0	0.0	0.0	0.0	0.0	0.0	0.0	0.0	0.0	0.0	0.0	0.0	0.0	0.0	1.0	0.0	0.0	0.0	0.0	0.0
S100PBP	64766	symbol	H. sapiens	64766	H. sapiens	S100PBP	S100P binding protein			Predicted intracellular proteins	Nuclear speckles (Supported)				0.0	0.0	0.0	0.0	0.0	0.0	0.0	0.0	0.0	0.0	0.0	0.0	0.0	0.0	0.0	0.0	0.0	0.0	0.0	0.0
SOS1	6654	symbol	H. sapiens	6654	H. sapiens	SOS1	SOS Ras/Rac guanine nucleotide exchange factor 1	GO:1904693 midbrain morphogenesis;GO:0007296 vitellogenesis;GO:0003344 pericardium morphogenesis		Disease related genes; Predicted intracellular proteins; RAS pathway related proteins; Cancer-related genes:Mutational cancer driver genes; Cancer-related genes:Mutated cancer genes	Cytosol (Approved)		(M12771)SA PTEN PATHWAY; (M18895)SA TRKA RECEPTOR; (M206)PID PDGFRA PATHWAY	(M5893)HALLMARK MITOTIC SPINDLE	0.0	0.0	0.0	0.0	0.0	0.0	0.0	0.0	0.0	0.0	0.0	0.0	0.0	0.0	0.0	1.0	0.0	0.0	1.0	1.0
ELF1	1997	symbol	H. sapiens	1997	H. sapiens	ELF1	E74 like ETS transcription factor 1	GO:0045944 positive regulation of transcription by RNA polymerase II;GO:0045893 positive regulation of transcription, DNA-templated;GO:1903508 positive regulation of nucleic acid-templated transcription		Predicted intracellular proteins; Transcription factors:Helix-turn-helix domains	Nucleoplasm (Supported)		(M234)PID IL2 STAT5 PATHWAY; (M92)PID ANGIOPOIETIN RECEPTOR PATHWAY; (M279)PID RB 1PATHWAY	(M5911)HALLMARK INTERFERON ALPHA RESPONSE; (M5906)HALLMARK ESTROGEN RESPONSE EARLY	0.0	0.0	0.0	0.0	0.0	0.0	0.0	0.0	0.0	0.0	0.0	0.0	0.0	0.0	0.0	0.0	0.0	0.0	0.0	0.0
RBM41	55285	symbol	H. sapiens	55285	H. sapiens	RBM41	RNA binding motif protein 41	GO:0000377 RNA splicing, via transesterification reactions with bulged adenosine as nucleophile;GO:0000398 mRNA splicing, via spliceosome;GO:0000375 RNA splicing, via transesterification reactions		Predicted intracellular proteins	Cytosol;Nuclear speckles (Approved)				1.0	0.0	0.0	0.0	0.0	0.0	0.0	0.0	0.0	0.0	0.0	0.0	0.0	0.0	0.0	0.0	0.0	0.0	0.0	0.0
ZNF318	24149	symbol	H. sapiens	24149	H. sapiens	ZNF318	zinc finger protein 318	GO:0051321 meiotic cell cycle;GO:0045892 negative regulation of transcription, DNA-templated;GO:1903507 negative regulation of nucleic acid-templated transcription		Predicted intracellular proteins	Nucleoplasm (Supported); Additional: Cytosol		(M58)PID AR PATHWAY		0.0	0.0	0.0	0.0	0.0	0.0	0.0	0.0	0.0	0.0	0.0	0.0	0.0	0.0	0.0	0.0	0.0	0.0	0.0	0.0
ERI2	112479	symbol	H. sapiens	112479	H. sapiens	ERI2	ERI1 exoribonuclease family member 2	GO:0000459 exonucleolytic trimming involved in rRNA processing;GO:0000467 exonucleolytic trimming to generate mature 3'-end of 5.8S rRNA from tricistronic rRNA transcript (SSU-rRNA, 5.8S rRNA, LSU-rRNA);GO:0031125 rRNA 3'-end processing		Predicted intracellular proteins	Golgi apparatus;Nucleoplasm (Supported)				0.0	0.0	0.0	0.0	1.0	0.0	0.0	0.0	0.0	0.0	0.0	0.0	0.0	0.0	0.0	0.0	0.0	0.0	0.0	0.0
FMOD	2331	symbol	H. sapiens	2331	H. sapiens	FMOD	fibromodulin	GO:0007181 transforming growth factor beta receptor complex assembly;GO:0030199 collagen fibril organization;GO:0007179 transforming growth factor beta receptor signaling pathway		Predicted secreted proteins			(M5882)NABA PROTEOGLYCANS; (M5884)NABA CORE MATRISOME; (M5889)NABA MATRISOME	(M5930)HALLMARK EPITHELIAL MESENCHYMAL TRANSITION	0.0	0.0	0.0	0.0	0.0	0.0	0.0	0.0	0.0	0.0	0.0	0.0	0.0	0.0	0.0	0.0	0.0	0.0	0.0	0.0
ALKBH1	8846	symbol	H. sapiens	8846	H. sapiens	ALKBH1	alkB homolog 1, histone H2A dioxygenase	GO:1990983 tRNA demethylation;GO:0002101 tRNA wobble cytosine modification;GO:0042245 RNA repair		ENZYME proteins:Oxidoreductases; Predicted intracellular proteins; ENZYME proteins:Lyases; Enzymes	Nucleoplasm (Supported); Additional: Endoplasmic reticulum				0.0	1.0	0.0	0.0	0.0	0.0	0.0	0.0	1.0	0.0	0.0	0.0	0.0	0.0	0.0	0.0	0.0	0.0	0.0	0.0
TARDBP	23435	symbol	H. sapiens	23435	H. sapiens	TARDBP	TAR DNA binding protein	GO:0071765 nuclear inner membrane organization;GO:0043922 negative regulation by host of viral transcription;GO:0061158 3'-UTR-mediated mRNA destabilization		Predicted intracellular proteins; Disease related genes	Nucleoplasm (Enhanced)			(M5926)HALLMARK MYC TARGETS V1	1.0	0.0	0.0	0.0	1.0	0.0	1.0	0.0	1.0	0.0	0.0	0.0	0.0	0.0	0.0	0.0	0.0	0.0	0.0	0.0
FAF2	23197	symbol	H. sapiens	23197	H. sapiens	FAF2	Fas associated factor family member 2	GO:0034389 lipid droplet organization;GO:0030970 retrograde protein transport, ER to cytosol;GO:1903513 endoplasmic reticulum to cytosol transport		Predicted intracellular proteins	Lipid droplets (Enhanced); Additional: Endoplasmic reticulum				0.0	0.0	0.0	0.0	0.0	0.0	0.0	0.0	0.0	0.0	1.0	0.0	0.0	0.0	0.0	0.0	0.0	0.0	0.0	0.0
ZNF41	7592	symbol	H. sapiens	7592	H. sapiens	ZNF41	zinc finger protein 41	GO:0006357 regulation of transcription by RNA polymerase II;GO:0006366 transcription by RNA polymerase II;GO:0006355 regulation of transcription, DNA-templated		Transcription factors:Zinc-coordinating DNA-binding domains; Predicted intracellular proteins; Disease related genes	Nucleoplasm (Approved)				0.0	0.0	0.0	0.0	0.0	0.0	0.0	0.0	0.0	0.0	0.0	0.0	0.0	0.0	0.0	0.0	0.0	0.0	0.0	0.0
HSPB11	51668	symbol	H. sapiens	51668	H. sapiens	HSPB11	heat shock protein family B (small) member 11	GO:0070986 left/right axis specification;GO:0060972 left/right pattern formation;GO:0042073 intraciliary transport		Predicted intracellular proteins	Nucleoplasm (Approved); Additional: Cytosol				0.0	0.0	1.0	0.0	0.0	0.0	0.0	0.0	0.0	0.0	0.0	0.0	1.0	0.0	0.0	1.0	0.0	0.0	0.0	0.0
CDON	50937	symbol	H. sapiens	50937	H. sapiens	CDON	cell adhesion associated, oncogene regulated	GO:0045663 positive regulation of myoblast differentiation;GO:0045661 regulation of myoblast differentiation;GO:0045445 myoblast differentiation		Predicted intracellular proteins; Disease related genes			(M211)PID HEDGEHOG 2PATHWAY	(M5942)HALLMARK UV RESPONSE DN	0.0	0.0	1.0	0.0	0.0	0.0	0.0	0.0	0.0	0.0	0.0	0.0	0.0	0.0	0.0	0.0	0.0	0.0	0.0	0.0
MAOA	4128	symbol	H. sapiens	4128	H. sapiens	MAOA	monoamine oxidase A	GO:0042420 dopamine catabolic process;GO:0019614 catechol-containing compound catabolic process;GO:0042424 catecholamine catabolic process		ENZYME proteins:Oxidoreductases; FDA approved drug targets:Small molecule drugs; Disease related genes; Enzymes	Mitochondria (Enhanced); Additional: Cytosol	Amphetamine; Phentermine; Procaine; Tranylcypromine; Phenelzine; Minaprine; Zonisamide; Selegiline; Procarbazine; Moclobemide; Isocarboxazid; Ephedra sinica root; MMDA; 4-Methoxyamphetamine; Metamfetamine; Pargyline; Flavin adenine dinucleotide; Clorgiline; Nialamide; Nomifensine; Zimelidine; Posizolid; CX157; Decyl(dimethyl)phosphine oxide; Harmine; Pirlindole; Toloxatone; Brofaromine; Flortauci…		(M5935)HALLMARK FATTY ACID METABOLISM; (M5941)HALLMARK UV RESPONSE UP; (M5934)HALLMARK XENOBIOTIC METABOLISM	0.0	0.0	0.0	0.0	0.0	0.0	0.0	0.0	1.0	0.0	0.0	0.0	0.0	0.0	0.0	0.0	0.0	0.0	0.0	1.0
ZNF311	282890	symbol	H. sapiens	282890	H. sapiens	ZNF311	zinc finger protein 311	GO:0006357 regulation of transcription by RNA polymerase II;GO:0006366 transcription by RNA polymerase II;GO:0006355 regulation of transcription, DNA-templated		Transcription factors:Zinc-coordinating DNA-binding domains; Predicted intracellular proteins					0.0	0.0	0.0	0.0	0.0	0.0	0.0	0.0	0.0	0.0	0.0	0.0	0.0	0.0	0.0	0.0	0.0	0.0	0.0	0.0
PRTFDC1	56952	symbol	H. sapiens	56952	H. sapiens	PRTFDC1	phosphoribosyl transferase domain containing 1	GO:0006178 guanine salvage;GO:0046099 guanine biosynthetic process;GO:0043096 purine nucleobase salvage		Predicted intracellular proteins	Nucleoplasm (Approved); Additional: Cytosol;Golgi apparatus				0.0	0.0	0.0	0.0	0.0	0.0	0.0	0.0	1.0	0.0	0.0	0.0	0.0	0.0	0.0	0.0	0.0	0.0	0.0	0.0
LOC100506834	100506834	Gene_ID	H. sapiens	100506834	H. sapiens	GAS1RR	GAS1 adjacent regulatory RNA								0.0	0.0	0.0	0.0	0.0	0.0	0.0	0.0	0.0	0.0	0.0	0.0	0.0	0.0	0.0	0.0	0.0	0.0	0.0	0.0
OCRL	4952	symbol	H. sapiens	4952	H. sapiens	OCRL	OCRL inositol polyphosphate-5-phosphatase	GO:0036092 phosphatidylinositol-3-phosphate biosynthetic process;GO:0046855 inositol phosphate dephosphorylation;GO:0046838 phosphorylated carbohydrate dephosphorylation		Disease related genes; Predicted intracellular proteins; Potential drug targets; ENZYME proteins:Hydrolases; Enzymes	Cytosol (Approved); Additional: Centriolar satellite;Microtubules			(M5910)HALLMARK PROTEIN SECRETION	0.0	0.0	1.0	0.0	0.0	0.0	0.0	0.0	0.0	0.0	0.0	0.0	0.0	0.0	0.0	0.0	0.0	0.0	0.0	0.0
PTOV1-AS1	100506033	symbol	H. sapiens	100506033	H. sapiens	PTOV1-AS1	PTOV1 antisense RNA 1								0.0	0.0	0.0	0.0	0.0	0.0	0.0	0.0	0.0	0.0	0.0	0.0	0.0	0.0	0.0	0.0	0.0	0.0	0.0	0.0
ZSCAN26	7741	symbol	H. sapiens	7741	H. sapiens	ZSCAN26	zinc finger and SCAN domain containing 26	GO:0006357 regulation of transcription by RNA polymerase II;GO:0006366 transcription by RNA polymerase II;GO:0006355 regulation of transcription, DNA-templated		Transcription factors:Zinc-coordinating DNA-binding domains; Predicted intracellular proteins	Nucleoli;Nucleoplasm (Enhanced)				0.0	0.0	0.0	0.0	0.0	0.0	0.0	0.0	0.0	0.0	0.0	0.0	0.0	0.0	0.0	0.0	0.0	0.0	0.0	0.0
NDRG2	57447	symbol	H. sapiens	57447	H. sapiens	NDRG2	NDRG family member 2	GO:0090360 platelet-derived growth factor production;GO:0090361 regulation of platelet-derived growth factor production;GO:0021762 substantia nigra development		Predicted intracellular proteins	Centriolar satellite (Approved); Additional: Cytosol;Nucleoplasm		(M254)PID MYC REPRESS PATHWAY	(M5934)HALLMARK XENOBIOTIC METABOLISM	0.0	0.0	0.0	0.0	0.0	0.0	0.0	0.0	0.0	0.0	0.0	0.0	0.0	0.0	0.0	0.0	0.0	0.0	0.0	0.0
EFCAB14	9813	symbol	H. sapiens	9813	H. sapiens	EFCAB14	EF-hand calcium binding domain 14				Cytosol (Approved); Additional: Golgi apparatus;Nucleoli				0.0	0.0	0.0	0.0	0.0	0.0	0.0	0.0	0.0	0.0	0.0	0.0	0.0	0.0	0.0	0.0	0.0	0.0	0.0	0.0
SLTM	79811	symbol	H. sapiens	79811	H. sapiens	SLTM	SAFB like transcription modulator	GO:0050684 regulation of mRNA processing;GO:1903311 regulation of mRNA metabolic process;GO:0006397 mRNA processing		Predicted intracellular proteins	Nuclear bodies;Nucleoplasm (Enhanced)				1.0	0.0	0.0	0.0	1.0	0.0	0.0	0.0	0.0	0.0	0.0	0.0	0.0	0.0	0.0	0.0	0.0	0.0	0.0	0.0
PRKD3	23683	symbol	H. sapiens	23683	H. sapiens	PRKD3	protein kinase D3	GO:0089700 protein kinase D signaling;GO:0007205 protein kinase C-activating G protein-coupled receptor signaling pathway;GO:0030148 sphingolipid biosynthetic process	CAMK Ser/Thr protein kinase family	Kinases:CAMK Ser/Thr protein kinases; Predicted intracellular proteins; Enzymes; ENZYME proteins:Transferases	Cytosol;Nucleoplasm (Approved)				0.0	0.0	0.0	0.0	0.0	0.0	0.0	0.0	0.0	0.0	0.0	0.0	0.0	0.0	0.0	0.0	0.0	0.0	0.0	0.0
SPEF2	79925	symbol	H. sapiens	79925	H. sapiens	SPEF2	sperm flagellar 2	GO:0007288 sperm axoneme assembly;GO:0120316 sperm flagellum assembly;GO:0048854 brain morphogenesis		Predicted intracellular proteins					0.0	0.0	1.0	0.0	0.0	0.0	0.0	0.0	0.0	0.0	0.0	1.0	0.0	0.0	0.0	1.0	0.0	0.0	0.0	0.0
ZNF391	346157	symbol	H. sapiens	346157	H. sapiens	ZNF391	zinc finger protein 391	GO:0000122 negative regulation of transcription by RNA polymerase II;GO:0045892 negative regulation of transcription, DNA-templated;GO:1903507 negative regulation of nucleic acid-templated transcription		Transcription factors:Zinc-coordinating DNA-binding domains; Predicted intracellular proteins					0.0	0.0	0.0	0.0	0.0	0.0	0.0	0.0	0.0	0.0	0.0	0.0	0.0	0.0	0.0	0.0	0.0	0.0	0.0	0.0
C11orf45	219833	gene_synonym	H. sapiens	219833	H. sapiens	KCNJ5-AS1	KCNJ5 antisense RNA 1			Predicted secreted proteins	Cytosol (Approved)				0.0	0.0	0.0	0.0	0.0	0.0	0.0	0.0	0.0	0.0	0.0	0.0	0.0	0.0	0.0	0.0	0.0	0.0	0.0	0.0
KLRAP1	10748	gene_synonym	H. sapiens	10748	H. sapiens	KLRA1P	killer cell lectin like receptor A1, pseudogene								0.0	0.0	0.0	0.0	0.0	0.0	0.0	0.0	0.0	0.0	0.0	0.0	0.0	0.0	0.0	0.0	0.0	0.0	0.0	0.0
GIT2	9815	symbol	H. sapiens	9815	H. sapiens	GIT2	GIT ArfGAP 2	GO:0008277 regulation of G protein-coupled receptor signaling pathway;GO:0007186 G protein-coupled receptor signaling pathway;GO:0050790 regulation of catalytic activity		Predicted intracellular proteins	Microtubules (Approved)		(M71)PID ILK PATHWAY; (M281)PID FAK PATHWAY		0.0	0.0	0.0	0.0	0.0	0.0	0.0	0.0	0.0	0.0	0.0	0.0	0.0	0.0	0.0	0.0	0.0	0.0	0.0	0.0
STK38	11329	symbol	H. sapiens	11329	H. sapiens	STK38	serine/threonine kinase 38	GO:0043407 negative regulation of MAP kinase activity;GO:0071901 negative regulation of protein serine/threonine kinase activity;GO:0043409 negative regulation of MAPK cascade	AGC Ser/Thr protein kinase family	Kinases:AGC Ser/Thr protein kinases; Predicted intracellular proteins; Enzymes; ENZYME proteins:Transferases	Cytosol (Approved)	Fostamatinib			0.0	0.0	0.0	0.0	0.0	0.0	0.0	0.0	0.0	0.0	0.0	0.0	0.0	0.0	0.0	0.0	0.0	0.0	0.0	0.0
USP4	7375	symbol	H. sapiens	7375	H. sapiens	USP4	ubiquitin specific peptidase 4	GO:0000244 spliceosomal tri-snRNP complex assembly;GO:0000387 spliceosomal snRNP assembly;GO:0034394 protein localization to cell surface		Predicted intracellular proteins; Peptidases:Cysteine-type peptidases; Enzymes; ENZYME proteins:Hydrolases	Cytosol;Plasma membrane (Approved)				1.0	0.0	0.0	0.0	0.0	0.0	0.0	0.0	0.0	0.0	1.0	0.0	0.0	0.0	0.0	0.0	0.0	0.0	0.0	0.0
NUMB	8650	symbol	H. sapiens	8650	H. sapiens	NUMB	NUMB endocytic adaptor protein	GO:0021849 neuroblast division in subventricular zone;GO:0099149 regulation of postsynaptic neurotransmitter receptor internalization;GO:0021670 lateral ventricle development		Predicted intracellular proteins; Cancer-related genes:Candidate cancer biomarkers	Cell Junctions (Enhanced)		(M17)PID NOTCH PATHWAY; (M48)PID MET PATHWAY	(M5895)HALLMARK WNT BETA CATENIN SIGNALING	0.0	0.0	0.0	1.0	0.0	0.0	1.0	0.0	0.0	0.0	0.0	0.0	1.0	0.0	0.0	0.0	0.0	0.0	0.0	0.0
WDR82	80335	symbol	H. sapiens	80335	H. sapiens	WDR82	WD repeat domain 82	GO:0080182 histone H3-K4 trimethylation;GO:0018023 peptidyl-lysine trimethylation;GO:0051568 histone H3-K4 methylation		Predicted intracellular proteins	Nucleoli rim (Supported)				0.0	0.0	0.0	0.0	0.0	1.0	0.0	0.0	0.0	1.0	0.0	0.0	0.0	0.0	0.0	0.0	0.0	0.0	0.0	0.0
KCNJ15	3772	symbol	H. sapiens	3772	H. sapiens	KCNJ15	potassium inwardly rectifying channel subfamily J member 15	GO:1990573 potassium ion import across plasma membrane;GO:0098659 inorganic cation import across plasma membrane;GO:0099587 inorganic ion import across plasma membrane		Predicted intracellular proteins; Voltage-gated ion channels:Inwardly Rectifying Potassium Channels	Plasma membrane (Approved); Additional: Cytosol;Vesicles		(M118)PID INTEGRIN A9B1 PATHWAY		0.0	0.0	0.0	0.0	0.0	0.0	0.0	0.0	0.0	0.0	0.0	0.0	0.0	0.0	0.0	0.0	0.0	0.0	0.0	0.0
VPRBP	9730	gene_synonym	H. sapiens	9730	H. sapiens	DCAF1	DDB1 and CUL4 associated factor 1	GO:0035212 cell competition in a multicellular organism;GO:1990245 histone H2A-T120 phosphorylation;GO:1990164 histone H2A phosphorylation		Predicted intracellular proteins; Enzymes; ENZYME proteins:Transferases	Nucleoplasm (Supported); Additional: Nucleoli fibrillar center				0.0	1.0	0.0	0.0	0.0	1.0	0.0	0.0	0.0	0.0	0.0	0.0	0.0	0.0	0.0	0.0	0.0	0.0	0.0	0.0
EFCAB2	84288	symbol	H. sapiens	84288	H. sapiens	EFCAB2	EF-hand calcium binding domain 2			Predicted intracellular proteins	Cytosol;Plasma membrane (Approved)				0.0	0.0	0.0	0.0	0.0	0.0	0.0	0.0	0.0	0.0	0.0	0.0	0.0	0.0	0.0	0.0	0.0	0.0	0.0	0.0
RBM5-AS1	100775107	symbol	H. sapiens	100775107	H. sapiens	RBM5-AS1	RBM5 antisense RNA 1								0.0	0.0	0.0	0.0	0.0	0.0	0.0	0.0	0.0	0.0	0.0	0.0	0.0	0.0	0.0	0.0	0.0	0.0	0.0	0.0
DMKN	93099	symbol	H. sapiens	93099	H. sapiens	DMKN	dermokine	GO:1903575 cornified envelope assembly;GO:0071709 membrane assembly;GO:0044091 membrane biogenesis		Predicted intracellular proteins; Predicted secreted proteins	Cytosol;Nucleoplasm (Approved)				0.0	0.0	0.0	0.0	0.0	0.0	0.0	0.0	0.0	0.0	0.0	0.0	0.0	0.0	0.0	0.0	0.0	0.0	0.0	0.0
MIS18BP1	55320	symbol	H. sapiens	55320	H. sapiens	MIS18BP1	MIS18 binding protein 1	GO:0051301 cell division;GO:0007049 cell cycle;GO:0009987 cellular process		Predicted intracellular proteins	Nucleoli (Approved); Additional: Cytosol				0.0	0.0	0.0	1.0	0.0	0.0	0.0	0.0	0.0	0.0	0.0	0.0	0.0	0.0	0.0	0.0	0.0	0.0	0.0	0.0
KIAA1429	25962	gene_synonym	H. sapiens	25962	H. sapiens	VIRMA	vir like m6A methyltransferase associated	GO:0110104 mRNA alternative polyadenylation;GO:0080009 mRNA methylation;GO:1900363 regulation of mRNA polyadenylation		Predicted intracellular proteins	Nuclear bodies (Supported); Additional: Nucleoplasm				1.0	0.0	0.0	0.0	1.0	0.0	0.0	0.0	0.0	1.0	0.0	0.0	0.0	0.0	0.0	0.0	0.0	0.0	0.0	0.0
PGK1	5230	symbol	H. sapiens	5230	H. sapiens	PGK1	phosphoglycerate kinase 1	GO:0031639 plasminogen activation;GO:0031638 zymogen activation;GO:0006094 gluconeogenesis		Disease related genes; ENZYME proteins:Transferases; Predicted intracellular proteins; Potential drug targets; Enzymes		Adenosine-5'-[Beta, Gamma-Methylene]Triphosphate; 3-phospho-D-glyceric acid; Copper; Artenimol	(M44)PID HIF2PATHWAY; (M255)PID HIF1 TFPATHWAY	(M5891)HALLMARK HYPOXIA; (M5924)HALLMARK MTORC1 SIGNALING; (M5926)HALLMARK MYC TARGETS V1	0.0	0.0	0.0	0.0	0.0	0.0	0.0	0.0	0.0	0.0	0.0	0.0	0.0	0.0	0.0	0.0	0.0	0.0	0.0	0.0
PINLYP	390940	symbol	H. sapiens	390940	H. sapiens	PINLYP	phospholipase A2 inhibitor and LY6/PLAUR domain containing	GO:0043086 negative regulation of catalytic activity;GO:0044092 negative regulation of molecular function;GO:0050790 regulation of catalytic activity		Predicted intracellular proteins; Predicted secreted proteins	Vesicles (Approved)				0.0	0.0	0.0	0.0	0.0	0.0	0.0	0.0	0.0	0.0	0.0	0.0	0.0	0.0	0.0	0.0	0.0	0.0	0.0	0.0
TAB3	257397	symbol	H. sapiens	257397	H. sapiens	TAB3	TGF-beta activated kinase 1 (MAP3K7) binding protein 3	GO:0010507 negative regulation of autophagy;GO:0043123 positive regulation of I-kappaB kinase/NF-kappaB signaling;GO:0043122 regulation of I-kappaB kinase/NF-kappaB signaling		Predicted intracellular proteins	Cytosol;Nuclear speckles (Approved)				0.0	0.0	0.0	0.0	0.0	0.0	0.0	0.0	0.0	0.0	0.0	0.0	0.0	0.0	0.0	0.0	0.0	0.0	0.0	1.0
ZNF438	220929	symbol	H. sapiens	220929	H. sapiens	ZNF438	zinc finger protein 438	GO:0045944 positive regulation of transcription by RNA polymerase II;GO:0045893 positive regulation of transcription, DNA-templated;GO:1903508 positive regulation of nucleic acid-templated transcription		Transcription factors:Zinc-coordinating DNA-binding domains; Predicted intracellular proteins	Nucleoplasm (Supported); Additional: Cytosol				0.0	0.0	0.0	0.0	0.0	0.0	0.0	0.0	0.0	0.0	0.0	0.0	0.0	0.0	0.0	0.0	0.0	0.0	0.0	0.0
CWC25	54883	symbol	H. sapiens	54883	H. sapiens	CWC25	CWC25 spliceosome associated protein homolog	GO:0000377 RNA splicing, via transesterification reactions with bulged adenosine as nucleophile;GO:0000398 mRNA splicing, via spliceosome;GO:0000375 RNA splicing, via transesterification reactions		Predicted intracellular proteins	Nuclear speckles (Enhanced)				1.0	0.0	0.0	0.0	0.0	0.0	0.0	0.0	0.0	0.0	0.0	0.0	0.0	0.0	0.0	0.0	0.0	0.0	0.0	0.0
ZNF510	22869	symbol	H. sapiens	22869	H. sapiens	ZNF510	zinc finger protein 510	GO:0006357 regulation of transcription by RNA polymerase II;GO:0006366 transcription by RNA polymerase II;GO:0006355 regulation of transcription, DNA-templated		Transcription factors:Zinc-coordinating DNA-binding domains; Predicted intracellular proteins	Nucleoplasm;Plasma membrane (Approved)				0.0	0.0	0.0	0.0	0.0	0.0	0.0	0.0	0.0	0.0	0.0	0.0	0.0	0.0	0.0	0.0	0.0	0.0	0.0	0.0
MAPK14	1432	symbol	H. sapiens	1432	H. sapiens	MAPK14	mitogen-activated protein kinase 14	GO:0099179 regulation of synaptic membrane adhesion;GO:0090400 stress-induced premature senescence;GO:0070391 response to lipoteichoic acid	CMGC Ser/Thr protein kinase family	ENZYME proteins:Transferases; Kinases:CMGC Ser/Thr protein kinases; Predicted intracellular proteins; Cancer-related genes:Candidate cancer biomarkers; Enzymes	Nuclear speckles (Supported); Additional: Cytosol	Dasatinib; 4-[5-[2-(1-phenyl-ethylamino)-pyrimidin-4-yl]-1-methyl-4-(3-trifluoromethylphenyl)-1H-imidazol-2-yl]-piperidine; N-[(3Z)-5-Tert-butyl-2-phenyl-1,2-dihydro-3H-pyrazol-3-ylidene]-N'-(4-chlorophenyl)urea; 1-(2,6-Dichlorophenyl)-5-(2,4-Difluorophenyl)-7-Piperidin-4-Yl-3,4-Dihydroquinolin-2(1h)-One; Inhibitor of P38 Kinase; 6((S)-3-Benzylpiperazin-1-Yl)-3-(Naphthalen-2-Yl)-4-(Pyridin-4-Yl)P…	(M26)PID NFKAPPAB ATYPICAL PATHWAY; (M199)PID P38 MK2 PATHWAY; (M268)PID S1P S1P2 PATHWAY	(M5942)HALLMARK UV RESPONSE DN; (M5901)HALLMARK G2M CHECKPOINT; (M5915)HALLMARK APICAL JUNCTION	1.0	1.0	1.0	0.0	1.0	0.0	1.0	0.0	1.0	0.0	0.0	0.0	0.0	1.0	0.0	0.0	0.0	0.0	1.0	1.0
PUM2	23369	symbol	H. sapiens	23369	H. sapiens	PUM2	pumilio RNA binding family member 2	GO:1900246 positive regulation of RIG-I signaling pathway;GO:0039535 regulation of RIG-I signaling pathway;GO:0039531 regulation of viral-induced cytoplasmic pattern recognition receptor signaling pathway		Predicted intracellular proteins	Cytosol (Enhanced)				1.0	0.0	0.0	0.0	1.0	0.0	0.0	0.0	1.0	0.0	0.0	0.0	0.0	0.0	1.0	0.0	0.0	1.0	0.0	0.0
MBTPS2	51360	symbol	H. sapiens	51360	H. sapiens	MBTPS2	membrane bound transcription factor peptidase, site 2	GO:0036500 ATF6-mediated unfolded protein response;GO:1990440 positive regulation of transcription from RNA polymerase II promoter in response to endoplasmic reticulum stress;GO:0031293 membrane protein intracellular domain proteolysis		Disease related genes; Potential drug targets; Peptidases:Metallopeptidases; ENZYME proteins:Hydrolases; Enzymes	Cytosol;Mitochondria;Nucleoplasm (Approved)				0.0	0.0	0.0	0.0	0.0	0.0	0.0	0.0	0.0	0.0	0.0	0.0	0.0	0.0	0.0	0.0	0.0	0.0	0.0	0.0
RAD21	5885	symbol	H. sapiens	5885	H. sapiens	RAD21	RAD21 cohesin complex component	GO:1990414 replication-born double-strand break repair via sister chromatid exchange;GO:0045876 positive regulation of sister chromatid cohesion;GO:0007063 regulation of sister chromatid cohesion		Cancer-related genes:Mutated cancer genes; Cancer-related genes:Mutational cancer driver genes; Predicted intracellular proteins; Disease related genes	Nucleoplasm (Enhanced)			(M5901)HALLMARK G2M CHECKPOINT; (M5925)HALLMARK E2F TARGETS	0.0	1.0	0.0	1.0	0.0	0.0	0.0	1.0	0.0	0.0	0.0	0.0	0.0	1.0	0.0	0.0	0.0	1.0	0.0	0.0
ZNF300	91975	symbol	H. sapiens	91975	H. sapiens	ZNF300	zinc finger protein 300	GO:0045944 positive regulation of transcription by RNA polymerase II;GO:0045893 positive regulation of transcription, DNA-templated;GO:1903508 positive regulation of nucleic acid-templated transcription		Transcription factors:Zinc-coordinating DNA-binding domains; Cancer-related genes:Mutational cancer driver genes; Predicted intracellular proteins	Nucleoplasm (Enhanced); Additional: Nuclear bodies;Nucleoli;Nucleoli rim				0.0	0.0	0.0	0.0	0.0	0.0	0.0	0.0	0.0	0.0	0.0	0.0	0.0	0.0	0.0	0.0	0.0	0.0	0.0	0.0
LINC01252	338817	symbol	H. sapiens	338817	H. sapiens	LINC01252	long intergenic non-protein coding RNA 1252								0.0	0.0	0.0	0.0	0.0	0.0	0.0	0.0	0.0	0.0	0.0	0.0	0.0	0.0	0.0	0.0	0.0	0.0	0.0	0.0
CLK1	1195	symbol	H. sapiens	1195	H. sapiens	CLK1	CDC like kinase 1	GO:0018107 peptidyl-threonine phosphorylation;GO:0018210 peptidyl-threonine modification;GO:0043484 regulation of RNA splicing	CMGC Ser/Thr protein kinase family	Kinases:CMGC Ser/Thr protein kinases; Predicted intracellular proteins; Enzymes; ENZYME proteins:Transferases	Nuclear membrane;Nucleoplasm (Supported)	Debromohymenialdisine; CHGN111; ethyl 3-[(E)-2-amino-1-cyanoethenyl]-6,7-dichloro-1-methyl-1H-indole-2-carboxylate; Fostamatinib			1.0	0.0	0.0	0.0	0.0	0.0	0.0	0.0	0.0	0.0	0.0	0.0	0.0	0.0	0.0	0.0	0.0	0.0	0.0	0.0
LINC01272	100506115	gene_synonym	H. sapiens	100506115	H. sapiens	PELATON	plaque enriched lncRNA in atherosclerotic and inflammatory bowel macrophage regulation								0.0	0.0	0.0	0.0	0.0	0.0	0.0	0.0	0.0	0.0	0.0	0.0	0.0	0.0	0.0	0.0	0.0	0.0	0.0	0.0
IL17RB	55540	symbol	H. sapiens	55540	H. sapiens	IL17RB	interleukin 17 receptor B	GO:0001558 regulation of cell growth;GO:0019221 cytokine-mediated signaling pathway;GO:0016049 cell growth			Nucleoplasm;Plasma membrane (Approved); Additional: Centriolar satellite;Mitotic spindle			(M5897)HALLMARK IL6 JAK STAT3 SIGNALING; (M5906)HALLMARK ESTROGEN RESPONSE EARLY; (M5907)HALLMARK ESTROGEN RESPONSE LATE	0.0	0.0	0.0	0.0	0.0	0.0	0.0	0.0	0.0	0.0	0.0	0.0	0.0	0.0	0.0	0.0	0.0	0.0	0.0	1.0
ABCC5	10057	symbol	H. sapiens	10057	H. sapiens	ABCC5	ATP binding cassette subfamily C member 5	GO:0070731 cGMP transport;GO:0035351 heme transmembrane transport;GO:0070730 cAMP transport		Transporters:Primary Active Transporters; Predicted intracellular proteins; Cancer-related genes:Candidate cancer biomarkers	Cell Junctions;Plasma membrane (Approved); Additional: Nucleoplasm	Curcumin; Curcumin sulfate		(M5949)HALLMARK PEROXISOME; (M5939)HALLMARK P53 PATHWAY	0.0	0.0	0.0	0.0	0.0	0.0	0.0	0.0	0.0	0.0	0.0	0.0	1.0	0.0	0.0	0.0	0.0	0.0	0.0	0.0
SNAI2	6591	symbol	H. sapiens	6591	H. sapiens	SNAI2	snail family transcriptional repressor 2	GO:0035921 desmosome disassembly;GO:0070563 negative regulation of vitamin D receptor signaling pathway;GO:0003273 cell migration involved in endocardial cushion formation		Transcription factors:Zinc-coordinating DNA-binding domains; Predicted intracellular proteins; Disease related genes	Nucleoplasm (Approved)		(M231)PID KIT PATHWAY; (M223)PID BETA CATENIN NUC PATHWAY; (M145)PID P53 DOWNSTREAM PATHWAY	(M5942)HALLMARK UV RESPONSE DN; (M5930)HALLMARK EPITHELIAL MESENCHYMAL TRANSITION	0.0	1.0	0.0	0.0	0.0	0.0	0.0	0.0	0.0	0.0	0.0	0.0	0.0	0.0	0.0	0.0	0.0	0.0	0.0	0.0
ARID4A	5926	symbol	H. sapiens	5926	H. sapiens	ARID4A	AT-rich interaction domain 4A	GO:0097368 establishment of Sertoli cell barrier;GO:0034773 histone H4-K20 trimethylation;GO:0060009 Sertoli cell development		Predicted intracellular proteins; Transcription factors:Helix-turn-helix domains	Nucleoplasm (Supported); Additional: Cytosol;Plasma membrane			(M5901)HALLMARK G2M CHECKPOINT	0.0	0.0	0.0	0.0	0.0	1.0	0.0	0.0	0.0	1.0	0.0	0.0	0.0	0.0	0.0	1.0	0.0	0.0	0.0	0.0
IL22RA1	58985	symbol	H. sapiens	58985	H. sapiens	IL22RA1	interleukin 22 receptor subunit alpha 1	GO:0050829 defense response to Gram-negative bacterium;GO:0042742 defense response to bacterium;GO:0019221 cytokine-mediated signaling pathway							0.0	0.0	0.0	0.0	0.0	0.0	0.0	0.0	0.0	0.0	0.0	0.0	0.0	0.0	0.0	0.0	0.0	0.0	0.0	1.0
CEP112	201134	symbol	H. sapiens	201134	H. sapiens	CEP112	centrosomal protein 112	GO:0097120 receptor localization to synapse;GO:0031503 protein-containing complex localization;GO:0051179 localization		Predicted intracellular proteins	Golgi apparatus (Approved); Additional: Nucleoplasm				0.0	0.0	0.0	0.0	0.0	0.0	0.0	0.0	0.0	0.0	0.0	0.0	1.0	0.0	0.0	0.0	0.0	0.0	0.0	0.0
CLK4	57396	symbol	H. sapiens	57396	H. sapiens	CLK4	CDC like kinase 4	GO:0043484 regulation of RNA splicing;GO:0046777 protein autophosphorylation;GO:0018108 peptidyl-tyrosine phosphorylation	CMGC Ser/Thr protein kinase family	Kinases:CMGC Ser/Thr protein kinases; Predicted intracellular proteins; Enzymes; ENZYME proteins:Transferases	Actin filaments (Approved)	Fostamatinib			1.0	0.0	0.0	0.0	0.0	0.0	0.0	0.0	0.0	0.0	0.0	0.0	0.0	0.0	0.0	0.0	0.0	0.0	0.0	0.0
REV1	51455	symbol	H. sapiens	51455	H. sapiens	REV1	REV1 DNA directed polymerase	GO:0070987 error-free translesion synthesis;GO:0042276 error-prone translesion synthesis;GO:0019985 translesion synthesis		Predicted intracellular proteins	Cytosol (Approved)				0.0	1.0	0.0	0.0	0.0	0.0	0.0	0.0	0.0	0.0	0.0	0.0	0.0	1.0	0.0	0.0	0.0	0.0	0.0	0.0
PRCP	5547	symbol	H. sapiens	5547	H. sapiens	PRCP	prolylcarboxypeptidase	GO:0002254 kinin cascade;GO:0002353 plasma kallikrein-kinin cascade;GO:0002155 regulation of thyroid hormone mediated signaling pathway		Predicted intracellular proteins; Peptidases:Serine-type peptidases; Enzymes; ENZYME proteins:Hydrolases	Vesicles (Supported)			(M5921)HALLMARK COMPLEMENT	0.0	0.0	0.0	0.0	0.0	0.0	0.0	0.0	0.0	0.0	0.0	0.0	0.0	0.0	0.0	0.0	0.0	0.0	0.0	0.0
SYPL1	6856	symbol	H. sapiens	6856	H. sapiens	SYPL1	synaptophysin like 1	GO:0007268 chemical synaptic transmission;GO:0098916 anterograde trans-synaptic signaling;GO:0099537 trans-synaptic signaling							0.0	0.0	0.0	0.0	0.0	0.0	0.0	0.0	0.0	0.0	0.0	0.0	0.0	0.0	0.0	0.0	0.0	0.0	0.0	0.0
ZNF32-AS2	414208	symbol	H. sapiens	414208	H. sapiens	ZNF32-AS2	ZNF32 antisense RNA 2								0.0	0.0	0.0	0.0	0.0	0.0	0.0	0.0	0.0	0.0	0.0	0.0	0.0	0.0	0.0	0.0	0.0	0.0	0.0	0.0
PDPN	10630	symbol	H. sapiens	10630	H. sapiens	PDPN	podoplanin	GO:1904328 regulation of myofibroblast contraction;GO:1990764 myofibroblast contraction;GO:0060838 lymphatic endothelial cell fate commitment			Plasma membrane (Supported); Additional: Cell Junctions;Mitochondria			(M5932)HALLMARK INFLAMMATORY RESPONSE	0.0	0.0	0.0	0.0	0.0	0.0	0.0	0.0	0.0	0.0	0.0	0.0	0.0	0.0	0.0	0.0	0.0	0.0	0.0	0.0
MSL3	10943	symbol	H. sapiens	10943	H. sapiens	MSL3	MSL complex subunit 3	GO:0043968 histone H2A acetylation;GO:0043984 histone H4-K16 acetylation;GO:0043967 histone H4 acetylation		Predicted intracellular proteins	Nucleoplasm (Approved)				0.0	0.0	0.0	0.0	0.0	1.0	0.0	0.0	0.0	0.0	0.0	0.0	0.0	0.0	0.0	0.0	0.0	0.0	0.0	0.0
HERC3	8916	symbol	H. sapiens	8916	H. sapiens	HERC3	HECT and RLD domain containing E3 ubiquitin protein ligase 3	GO:0016567 protein ubiquitination;GO:0032446 protein modification by small protein conjugation;GO:0070647 protein modification by small protein conjugation or removal		Predicted intracellular proteins; Enzymes; ENZYME proteins:Transferases	Cytosol (Approved)			(M5908)HALLMARK ANDROGEN RESPONSE	0.0	0.0	0.0	0.0	0.0	0.0	0.0	0.0	0.0	0.0	0.0	0.0	0.0	0.0	0.0	0.0	0.0	0.0	0.0	0.0
MME	4311	symbol	H. sapiens	4311	H. sapiens	MME	membrane metalloendopeptidase	GO:0046449 creatinine metabolic process;GO:0061837 neuropeptide processing;GO:0072338 cellular lactam metabolic process		CD markers; Disease related genes; Predicted intracellular proteins; Peptidases:Metallopeptidases; ENZYME proteins:Hydrolases; Cancer-related genes:Candidate cancer biomarkers; FDA approved drug targets:Small molecule drugs; Candidate cardiovascular disease genes; Enzymes		Candoxatril; Omapatrilat; N-[3-[(1-Aminoethyl)(Hydroxy)Phosphoryl]-2-(1,1'-Biphenyl-4-Ylmethyl)Propanoyl]Alanine; Phosphoramidon; N-(3-Phenyl-2-Sulfanylpropanoyl)Phenylalanylalanine; [2(R,S)-2-Sulfanylheptanoyl]-Phe-Ala; Daglutril; 2-[(1S)-1-BENZYL-2-SULFANYLETHYL]-1H-IMIDAZO[4,5-C]PYRIDIN-5-IUM; Thiorphan; Sacubitril; Candoxatrilat			0.0	0.0	0.0	0.0	0.0	0.0	0.0	0.0	0.0	0.0	0.0	0.0	0.0	0.0	0.0	0.0	0.0	0.0	0.0	1.0
SMC3	9126	symbol	H. sapiens	9126	H. sapiens	SMC3	structural maintenance of chromosomes 3	GO:0007064 mitotic sister chromatid cohesion;GO:0007062 sister chromatid cohesion;GO:0090307 mitotic spindle assembly		Cancer-related genes:Mutated cancer genes; Cancer-related genes:Mutational cancer driver genes; Predicted intracellular proteins; Disease related genes	Nucleoplasm (Supported)		(M84)PID ATM PATHWAY	(M5893)HALLMARK MITOTIC SPINDLE; (M5925)HALLMARK E2F TARGETS	0.0	1.0	0.0	1.0	0.0	0.0	0.0	0.0	0.0	0.0	0.0	1.0	0.0	1.0	1.0	0.0	0.0	1.0	0.0	0.0
PROSER1	80209	symbol	H. sapiens	80209	H. sapiens	PROSER1	proline and serine rich 1			Predicted intracellular proteins	Nucleoplasm (Approved); Additional: Cytosol				0.0	0.0	0.0	0.0	0.0	0.0	0.0	0.0	0.0	0.0	0.0	0.0	0.0	0.0	0.0	0.0	0.0	0.0	0.0	0.0
CCNT2-AS1	100129961	symbol	H. sapiens	100129961	H. sapiens	CCNT2-AS1	CCNT2 antisense RNA 1								0.0	0.0	0.0	0.0	0.0	0.0	0.0	0.0	0.0	0.0	0.0	0.0	0.0	0.0	0.0	0.0	0.0	0.0	0.0	0.0
MAP2K6	5608	symbol	H. sapiens	5608	H. sapiens	MAP2K6	mitogen-activated protein kinase kinase 6	GO:0072709 cellular response to sorbitol;GO:0072708 response to sorbitol;GO:0006975 DNA damage induced protein phosphorylation	STE Ser/Thr protein kinase family	Kinases:STE Ser/Thr protein kinases; Predicted intracellular proteins; Enzymes; ENZYME proteins:Transferases	Cytosol;Nucleoplasm (Supported)	Fostamatinib	(M209)PID P38 GAMMA DELTA PATHWAY; (M267)PID ANTHRAX PATHWAY; (M20)PID P38 MKK3 6PATHWAY	(M5923)HALLMARK PI3K AKT MTOR SIGNALING	0.0	1.0	0.0	0.0	0.0	0.0	0.0	0.0	0.0	0.0	0.0	0.0	0.0	1.0	0.0	0.0	0.0	0.0	0.0	1.0
KRIT1	889	symbol	H. sapiens	889	H. sapiens	KRIT1	KRIT1 ankyrin repeat containing	GO:2000114 regulation of establishment of cell polarity;GO:0032878 regulation of establishment or maintenance of cell polarity;GO:0045454 cell redox homeostasis		Predicted intracellular proteins; Disease related genes	Vesicles (Uncertain)				0.0	0.0	0.0	0.0	0.0	0.0	0.0	0.0	0.0	0.0	0.0	0.0	0.0	0.0	0.0	0.0	0.0	0.0	0.0	0.0
CWC22	57703	symbol	H. sapiens	57703	H. sapiens	CWC22	CWC22 spliceosome associated protein homolog	GO:0048024 regulation of mRNA splicing, via spliceosome;GO:0050684 regulation of mRNA processing;GO:0043484 regulation of RNA splicing		Predicted intracellular proteins	Nuclear speckles (Supported); Additional: Cytosol				1.0	0.0	0.0	0.0	1.0	0.0	0.0	0.0	0.0	0.0	0.0	0.0	0.0	0.0	0.0	0.0	0.0	0.0	0.0	0.0
CFL2	1073	symbol	H. sapiens	1073	H. sapiens	CFL2	cofilin 2	GO:0030043 actin filament fragmentation;GO:0030836 positive regulation of actin filament depolymerization;GO:0051014 actin filament severing		Predicted intracellular proteins; Disease related genes	Cytosol;Nucleoplasm (Approved); Additional: Plasma membrane		(M16801)SIG REGULATION OF THE ACTIN CYTOSKELETON BY RHO GTPASES; (M5193)SIG CHEMOTAXIS; (M220)PID CASPASE PATHWAY		0.0	0.0	0.0	0.0	0.0	0.0	0.0	1.0	0.0	0.0	0.0	0.0	0.0	0.0	1.0	0.0	0.0	0.0	0.0	0.0
GALC	2581	symbol	H. sapiens	2581	H. sapiens	GALC	galactosylceramidase	GO:0006683 galactosylceramide catabolic process;GO:0019376 galactolipid catabolic process;GO:0046477 glycosylceramide catabolic process		Disease related genes; Predicted intracellular proteins; Potential drug targets; ENZYME proteins:Hydrolases; Enzymes				(M5910)HALLMARK PROTEIN SECRETION	0.0	0.0	0.0	0.0	0.0	0.0	0.0	0.0	0.0	0.0	0.0	0.0	0.0	0.0	0.0	0.0	0.0	0.0	0.0	0.0
WNK1	65125	symbol	H. sapiens	65125	H. sapiens	WNK1	WNK lysine deficient protein kinase 1	GO:0097022 lymphocyte migration into lymph node;GO:0033633 negative regulation of cell-cell adhesion mediated by integrin;GO:0038116 chemokine (C-C motif) ligand 21 signaling pathway	Other	Disease related genes; ENZYME proteins:Transferases; Predicted intracellular proteins; Potential drug targets; Enzymes; Kinases	Cytosol (Supported)				0.0	0.0	0.0	0.0	0.0	0.0	0.0	0.0	0.0	0.0	0.0	0.0	0.0	0.0	0.0	0.0	0.0	0.0	0.0	0.0
TTLL5	23093	symbol	H. sapiens	23093	H. sapiens	TTLL5	tubulin tyrosine ligase like 5	GO:0018095 protein polyglutamylation;GO:0018200 peptidyl-glutamic acid modification;GO:0060041 retina development in camera-type eye		Predicted intracellular proteins; Disease related genes	Cytosol;Plasma membrane (Supported)				0.0	0.0	1.0	0.0	0.0	0.0	0.0	0.0	0.0	0.0	0.0	1.0	0.0	0.0	0.0	0.0	0.0	0.0	0.0	0.0
CD46	4179	symbol	H. sapiens	4179	H. sapiens	CD46	CD46 molecule	GO:0045959 negative regulation of complement activation, classical pathway;GO:0030450 regulation of complement activation, classical pathway;GO:0043382 positive regulation of memory T cell differentiation		CD markers; Disease related genes; Cancer-related genes:Candidate cancer biomarkers	Plasma membrane (Approved)			(M5921)HALLMARK COMPLEMENT	0.0	0.0	0.0	0.0	0.0	0.0	0.0	0.0	0.0	0.0	0.0	0.0	0.0	0.0	0.0	0.0	0.0	0.0	0.0	0.0
RBM25	58517	symbol	H. sapiens	58517	H. sapiens	RBM25	RNA binding motif protein 25	GO:0000381 regulation of alternative mRNA splicing, via spliceosome;GO:0000380 alternative mRNA splicing, via spliceosome;GO:0048024 regulation of mRNA splicing, via spliceosome		Predicted intracellular proteins	Nuclear speckles (Enhanced)				1.0	0.0	0.0	0.0	1.0	0.0	0.0	0.0	0.0	0.0	0.0	0.0	0.0	0.0	0.0	0.0	0.0	0.0	0.0	0.0
DDX5	1655	symbol	H. sapiens	1655	H. sapiens	DDX5	DEAD-box helicase 5	GO:1903800 positive regulation of production of miRNAs involved in gene silencing by miRNA;GO:0043517 positive regulation of DNA damage response, signal transduction by p53 class mediator;GO:0009299 mRNA transcription		Predicted intracellular proteins; Cancer-related genes:Mutational cancer driver genes; ENZYME proteins:Hydrolases; Cancer-related genes:Mutated cancer genes; Enzymes	Nucleoli;Nucleoplasm (Supported)	Artenimol	(M145)PID P53 DOWNSTREAM PATHWAY		1.0	1.0	0.0	0.0	1.0	0.0	0.0	0.0	1.0	0.0	0.0	0.0	0.0	0.0	0.0	0.0	0.0	0.0	0.0	0.0
PBX3	5090	symbol	H. sapiens	5090	H. sapiens	PBX3	PBX homeobox 3	GO:0007387 anterior compartment pattern formation;GO:0007388 posterior compartment specification;GO:0007386 compartment pattern specification		Predicted intracellular proteins; Transcription factors:Helix-turn-helix domains	Nucleoplasm (Approved); Additional: Cytosol;Nuclear bodies				0.0	0.0	0.0	0.0	0.0	0.0	0.0	0.0	0.0	0.0	0.0	0.0	0.0	0.0	0.0	0.0	0.0	0.0	0.0	0.0
U2SURP	23350	symbol	H. sapiens	23350	H. sapiens	U2SURP	U2 snRNP associated SURP domain containing	GO:0006396 RNA processing;GO:0016070 RNA metabolic process;GO:0090304 nucleic acid metabolic process		Predicted intracellular proteins	Nucleoplasm (Supported)				1.0	0.0	0.0	0.0	0.0	0.0	0.0	0.0	0.0	0.0	0.0	0.0	0.0	0.0	0.0	0.0	0.0	0.0	0.0	0.0
NUDT13	25961	symbol	H. sapiens	25961	H. sapiens	NUDT13	nudix hydrolase 13	GO:0006742 NADP catabolic process;GO:0019364 pyridine nucleotide catabolic process;GO:0015949 nucleobase-containing small molecule interconversion		Predicted intracellular proteins	Nucleoplasm (Approved)				0.0	0.0	0.0	0.0	0.0	0.0	0.0	0.0	1.0	0.0	0.0	0.0	0.0	0.0	0.0	0.0	0.0	0.0	0.0	0.0
SEC23IP	11196	symbol	H. sapiens	11196	H. sapiens	SEC23IP	SEC23 interacting protein	GO:0006888 endoplasmic reticulum to Golgi vesicle-mediated transport;GO:0007030 Golgi organization;GO:0048193 Golgi vesicle transport		Predicted intracellular proteins	Vesicles (Enhanced)				0.0	0.0	0.0	0.0	0.0	0.0	0.0	0.0	0.0	0.0	0.0	0.0	0.0	0.0	0.0	0.0	0.0	0.0	0.0	0.0
DDX24	57062	symbol	H. sapiens	57062	H. sapiens	DDX24	DEAD-box helicase 24	GO:0016070 RNA metabolic process;GO:0090304 nucleic acid metabolic process;GO:0006139 nucleobase-containing compound metabolic process		Predicted intracellular proteins; Enzymes; ENZYME proteins:Hydrolases	Cytosol;Nucleoli (Approved)				0.0	0.0	0.0	0.0	0.0	0.0	0.0	0.0	0.0	0.0	0.0	0.0	0.0	0.0	0.0	0.0	0.0	0.0	0.0	0.0
LOC100049716	100049716	Gene_ID	H. sapiens	100049716	H. sapiens	NINJ2-AS1	NINJ2 antisense RNA 1								0.0	0.0	0.0	0.0	0.0	0.0	0.0	0.0	0.0	0.0	0.0	0.0	0.0	0.0	0.0	0.0	0.0	0.0	0.0	0.0
ZCCHC4	29063	symbol	H. sapiens	29063	H. sapiens	ZCCHC4	zinc finger CCHC-type containing 4	GO:0031167 rRNA methylation;GO:0000154 rRNA modification;GO:0001510 RNA methylation		Predicted intracellular proteins	Golgi apparatus;Nuclear speckles (Approved)				0.0	0.0	0.0	0.0	0.0	0.0	0.0	0.0	1.0	1.0	0.0	0.0	0.0	0.0	0.0	0.0	0.0	0.0	0.0	0.0
ZNF45	7596	symbol	H. sapiens	7596	H. sapiens	ZNF45	zinc finger protein 45	GO:0006357 regulation of transcription by RNA polymerase II;GO:0006366 transcription by RNA polymerase II;GO:0006355 regulation of transcription, DNA-templated		Transcription factors:Zinc-coordinating DNA-binding domains; Predicted intracellular proteins	Nucleoplasm (Supported)				0.0	0.0	0.0	0.0	0.0	0.0	0.0	0.0	0.0	0.0	0.0	0.0	0.0	0.0	0.0	0.0	0.0	0.0	0.0	0.0
RGL4	266747	symbol	H. sapiens	266747	H. sapiens	RGL4	ral guanine nucleotide dissociation stimulator like 4	GO:0007264 small GTPase mediated signal transduction;GO:0050790 regulation of catalytic activity;GO:0035556 intracellular signal transduction		Predicted intracellular proteins	Centrosome (Approved)				0.0	0.0	0.0	0.0	0.0	0.0	0.0	0.0	0.0	0.0	0.0	0.0	0.0	0.0	0.0	0.0	0.0	0.0	0.0	0.0
ZNF184	7738	symbol	H. sapiens	7738	H. sapiens	ZNF184	zinc finger protein 184	GO:0006357 regulation of transcription by RNA polymerase II;GO:0006366 transcription by RNA polymerase II;GO:0006355 regulation of transcription, DNA-templated		Transcription factors:Zinc-coordinating DNA-binding domains; Predicted intracellular proteins	Nucleoplasm (Supported)				0.0	0.0	0.0	0.0	0.0	0.0	0.0	0.0	0.0	0.0	0.0	0.0	0.0	0.0	0.0	0.0	0.0	0.0	0.0	0.0
SLC25A27	9481	symbol	H. sapiens	9481	H. sapiens	SLC25A27	solute carrier family 25 member 27	GO:0051562 negative regulation of mitochondrial calcium ion concentration;GO:0035356 cellular triglyceride homeostasis;GO:0010917 negative regulation of mitochondrial membrane potential		Predicted intracellular proteins; Transporters:Electrochemical Potential-driven transporters	Mitochondria (Supported)				0.0	0.0	0.0	0.0	0.0	0.0	0.0	0.0	0.0	0.0	0.0	0.0	0.0	0.0	0.0	0.0	0.0	0.0	0.0	0.0
MGST1	4257	symbol	H. sapiens	4257	H. sapiens	MGST1	microsomal glutathione S-transferase 1	GO:0071449 cellular response to lipid hydroperoxide;GO:0006982 response to lipid hydroperoxide;GO:0071447 cellular response to hydroperoxide		Predicted intracellular proteins; Enzymes; ENZYME proteins:Transferases	Mitochondria (Approved); Additional: Endoplasmic reticulum	Glutathione; Glutathione disulfide		(M5938)HALLMARK REACTIVE OXYGEN SPECIES PATHWAY	0.0	0.0	0.0	0.0	0.0	0.0	0.0	0.0	0.0	0.0	0.0	0.0	0.0	0.0	0.0	0.0	0.0	0.0	0.0	0.0
P4HA2-AS1	100861518	symbol	H. sapiens	100861518	H. sapiens	P4HA2-AS1	P4HA2 antisense RNA 1								0.0	0.0	0.0	0.0	0.0	0.0	0.0	0.0	0.0	0.0	0.0	0.0	0.0	0.0	0.0	0.0	0.0	0.0	0.0	0.0
ERMAP	114625	symbol	H. sapiens	114625	H. sapiens	ERMAP	erythroblast membrane associated protein (Scianna blood group)	GO:0050852 T cell receptor signaling pathway;GO:0050851 antigen receptor-mediated signaling pathway;GO:0002429 immune response-activating cell surface receptor signaling pathway		Predicted intracellular proteins; Blood group antigen proteins	Golgi apparatus (Approved); Additional: Cytosol			(M5945)HALLMARK HEME METABOLISM	0.0	0.0	0.0	0.0	0.0	0.0	0.0	0.0	0.0	0.0	0.0	0.0	0.0	0.0	0.0	0.0	0.0	0.0	0.0	0.0
RALB	5899	symbol	H. sapiens	5899	H. sapiens	RALB	RAS like proto-oncogene B	GO:0001927 exocyst assembly;GO:0001928 regulation of exocyst assembly;GO:0060178 regulation of exocyst localization		Predicted intracellular proteins; RAS pathway related proteins			(M76)PID P38 ALPHA BETA PATHWAY; (M136)PID FOXO PATHWAY; (M124)PID CXCR4 PATHWAY	(M5923)HALLMARK PI3K AKT MTOR SIGNALING	0.0	0.0	0.0	1.0	0.0	0.0	1.0	1.0	1.0	0.0	0.0	0.0	1.0	0.0	1.0	0.0	0.0	0.0	1.0	0.0
MDM1	56890	symbol	H. sapiens	56890	H. sapiens	MDM1	Mdm1 nuclear protein	GO:0046600 negative regulation of centriole replication;GO:0010826 negative regulation of centrosome duplication;GO:0046606 negative regulation of centrosome cycle		Predicted intracellular proteins	Centrosome (Supported); Additional: Cytosol				0.0	0.0	0.0	0.0	0.0	0.0	0.0	0.0	0.0	0.0	0.0	1.0	0.0	0.0	1.0	0.0	0.0	0.0	0.0	0.0
ZMIZ1-AS1	283050	symbol	H. sapiens	283050	H. sapiens	ZMIZ1-AS1	ZMIZ1 antisense RNA 1								0.0	0.0	0.0	0.0	0.0	0.0	0.0	0.0	0.0	0.0	0.0	0.0	0.0	0.0	0.0	0.0	0.0	0.0	0.0	0.0
PIGC	5279	symbol	H. sapiens	5279	H. sapiens	PIGC	phosphatidylinositol glycan anchor biosynthesis class C	GO:0006506 GPI anchor biosynthetic process;GO:0006505 GPI anchor metabolic process;GO:0009247 glycolipid biosynthetic process		Enzymes; ENZYME proteins:Transferases					0.0	0.0	0.0	0.0	0.0	0.0	0.0	0.0	0.0	0.0	0.0	0.0	0.0	0.0	0.0	0.0	0.0	0.0	0.0	0.0
PHYHD1	254295	symbol	H. sapiens	254295	H. sapiens	PHYHD1	phytanoyl-CoA dioxygenase domain containing 1			Predicted intracellular proteins	Nuclear speckles (Approved)				0.0	0.0	0.0	0.0	0.0	0.0	0.0	0.0	0.0	0.0	0.0	0.0	0.0	0.0	0.0	0.0	0.0	0.0	0.0	0.0
SREK1	140890	symbol	H. sapiens	140890	H. sapiens	SREK1	splicing regulatory glutamic acid and lysine rich protein 1	GO:0008380 RNA splicing;GO:0006397 mRNA processing;GO:0016071 mRNA metabolic process		Predicted intracellular proteins	Nuclear speckles;Nucleoplasm (Enhanced)				1.0	0.0	0.0	0.0	0.0	0.0	0.0	0.0	0.0	0.0	0.0	0.0	0.0	0.0	0.0	0.0	0.0	0.0	0.0	0.0
ZBTB26	57684	symbol	H. sapiens	57684	H. sapiens	ZBTB26	zinc finger and BTB domain containing 26	GO:0000122 negative regulation of transcription by RNA polymerase II;GO:0045892 negative regulation of transcription, DNA-templated;GO:1903507 negative regulation of nucleic acid-templated transcription		Transcription factors:Zinc-coordinating DNA-binding domains; Predicted intracellular proteins					0.0	0.0	0.0	0.0	0.0	0.0	0.0	0.0	0.0	0.0	0.0	0.0	0.0	0.0	0.0	0.0	0.0	0.0	0.0	0.0
ZEB1	6935	symbol	H. sapiens	6935	H. sapiens	ZEB1	zinc finger E-box binding homeobox 1	GO:0045602 negative regulation of endothelial cell differentiation;GO:0045601 regulation of endothelial cell differentiation;GO:0030857 negative regulation of epithelial cell differentiation		Predicted intracellular proteins; Disease related genes; Transcription factors:Helix-turn-helix domains	Nucleoplasm (Supported); Additional: Nucleoli		(M71)PID ILK PATHWAY	(M5921)HALLMARK COMPLEMENT	0.0	0.0	0.0	0.0	0.0	0.0	0.0	0.0	0.0	0.0	0.0	0.0	0.0	0.0	0.0	0.0	0.0	0.0	0.0	1.0
CBFA2T2	9139	symbol	H. sapiens	9139	H. sapiens	CBFA2T2	CBFA2/RUNX1 partner transcriptional co-repressor 2	GO:0060575 intestinal epithelial cell differentiation;GO:0045746 negative regulation of Notch signaling pathway;GO:0002065 columnar/cuboidal epithelial cell differentiation		Predicted intracellular proteins; Disease related genes	Nuclear speckles (Approved)				0.0	0.0	0.0	0.0	0.0	0.0	0.0	0.0	0.0	0.0	0.0	0.0	0.0	0.0	0.0	0.0	0.0	0.0	0.0	0.0
SEPSECS	51091	symbol	H. sapiens	51091	H. sapiens	SEPSECS	Sep (O-phosphoserine) tRNA:Sec (selenocysteine) tRNA synthase	GO:0097056 selenocysteinyl-tRNA(Sec) biosynthetic process;GO:0001514 selenocysteine incorporation;GO:0006451 translational readthrough		Disease related genes; ENZYME proteins:Transferases; Predicted intracellular proteins; Potential drug targets; Enzymes	Vesicles (Approved)	Pyridoxal phosphate			0.0	0.0	0.0	0.0	0.0	0.0	0.0	0.0	1.0	0.0	0.0	0.0	0.0	0.0	0.0	0.0	0.0	0.0	0.0	0.0
MRPL13	28998	symbol	H. sapiens	28998	H. sapiens	MRPL13	mitochondrial ribosomal protein L13	GO:0017148 negative regulation of translation;GO:0034249 negative regulation of cellular amide metabolic process;GO:0006417 regulation of translation		Ribosomal proteins; Predicted intracellular proteins					0.0	0.0	0.0	0.0	0.0	0.0	0.0	0.0	1.0	0.0	0.0	0.0	0.0	0.0	0.0	0.0	0.0	0.0	0.0	0.0
CYP3A5	1577	symbol	H. sapiens	1577	H. sapiens	CYP3A5	cytochrome P450 family 3 subfamily A member 5	GO:0009822 alkaloid catabolic process;GO:0002933 lipid hydroxylation;GO:0043385 mycotoxin metabolic process		ENZYME proteins:Oxidoreductases; Predicted intracellular proteins; Enzymes; Cancer-related genes:Candidate cancer biomarkers	Cytosol (Approved); Additional: Vesicles	Cannabidiol; Nabiximols			0.0	0.0	0.0	0.0	0.0	0.0	0.0	0.0	1.0	0.0	0.0	0.0	0.0	0.0	0.0	0.0	0.0	0.0	0.0	0.0
USP8	9101	symbol	H. sapiens	9101	H. sapiens	USP8	ubiquitin specific peptidase 8	GO:0099576 regulation of protein catabolic process at postsynapse, modulating synaptic transmission;GO:0099170 postsynaptic modulation of chemical synaptic transmission;GO:0071549 cellular response to dexamethasone stimulus		Disease related genes; Predicted intracellular proteins; Peptidases:Cysteine-type peptidases; Potential drug targets; ENZYME proteins:Hydrolases; Enzymes; Cancer-related genes	Golgi apparatus (Supported); Additional: Cytosol		(M214)PID ERBB1 INTERNALIZATION PATHWAY; (M175)PID ERBB2 ERBB3 PATHWAY	(M5921)HALLMARK COMPLEMENT	0.0	0.0	0.0	1.0	0.0	0.0	0.0	0.0	0.0	0.0	1.0	0.0	0.0	0.0	0.0	0.0	0.0	0.0	1.0	0.0
CALML4	91860	symbol	H. sapiens	91860	H. sapiens	CALML4	calmodulin like 4	GO:0050790 regulation of catalytic activity;GO:0065009 regulation of molecular function;GO:0065007 biological regulation		Predicted intracellular proteins; RAS pathway related proteins	Golgi apparatus (Approved); Additional: Cytosol;Nucleoplasm				0.0	0.0	0.0	0.0	0.0	0.0	0.0	0.0	0.0	0.0	0.0	0.0	0.0	0.0	0.0	0.0	0.0	0.0	0.0	1.0
FOXP2	93986	symbol	H. sapiens	93986	H. sapiens	FOXP2	forkhead box P2	GO:0021757 caudate nucleus development;GO:0021758 putamen development;GO:0098582 innate vocalization behavior		Predicted intracellular proteins; Disease related genes; Transcription factors:Helix-turn-helix domains	Nucleoplasm (Enhanced)				0.0	0.0	0.0	0.0	0.0	0.0	0.0	0.0	0.0	0.0	0.0	0.0	0.0	0.0	0.0	0.0	0.0	0.0	0.0	0.0
USP28	57646	symbol	H. sapiens	57646	H. sapiens	USP28	ubiquitin specific peptidase 28	GO:0042771 intrinsic apoptotic signaling pathway in response to DNA damage by p53 class mediator;GO:0072332 intrinsic apoptotic signaling pathway by p53 class mediator;GO:0034644 cellular response to UV		Predicted intracellular proteins; Peptidases:Cysteine-type peptidases; Enzymes; ENZYME proteins:Hydrolases	Nucleoplasm (Supported); Additional: Nuclear bodies				0.0	1.0	0.0	0.0	0.0	0.0	0.0	0.0	0.0	0.0	1.0	0.0	0.0	0.0	0.0	0.0	0.0	0.0	0.0	0.0
CD44	960	symbol	H. sapiens	960	H. sapiens	CD44	CD44 molecule (Indian blood group)	GO:1900623 regulation of monocyte aggregation;GO:1900625 positive regulation of monocyte aggregation;GO:0070487 monocyte aggregation		Blood group antigen proteins; CD markers; Predicted intracellular proteins; Cancer-related genes:Candidate cancer biomarkers; FDA approved drug targets:Small molecule drugs; Predicted secreted proteins	Plasma membrane (Supported); Additional: Golgi apparatus	Bivatuzumab; Hyaluronic acid	(M11736)SA MMP CYTOKINE CONNECTION; (M63)PID AVB3 OPN PATHWAY	(M5897)HALLMARK IL6 JAK STAT3 SIGNALING; (M5902)HALLMARK APOPTOSIS; (M5947)HALLMARK IL2 STAT5 SIGNALING	0.0	1.0	0.0	0.0	0.0	0.0	0.0	0.0	0.0	0.0	0.0	0.0	0.0	0.0	0.0	0.0	0.0	0.0	0.0	1.0
PDCD6IP	10015	symbol	H. sapiens	10015	H. sapiens	PDCD6IP	programmed cell death 6 interacting protein	GO:1903553 positive regulation of extracellular exosome assembly;GO:0090611 ubiquitin-independent protein catabolic process via the multivesicular body sorting pathway;GO:0000912 assembly of actomyosin apparatus involved in cytokinesis		Predicted intracellular proteins	Vesicles (Enhanced)				0.0	0.0	0.0	1.0	0.0	0.0	0.0	1.0	0.0	0.0	1.0	1.0	0.0	0.0	1.0	0.0	0.0	1.0	0.0	0.0
VPS8	23355	symbol	H. sapiens	23355	H. sapiens	VPS8	VPS8 subunit of CORVET complex	GO:0034058 endosomal vesicle fusion;GO:0006906 vesicle fusion;GO:0090174 organelle membrane fusion		Predicted intracellular proteins	Cytosol (Approved); Additional: Plasma membrane				0.0	0.0	0.0	0.0	0.0	0.0	0.0	0.0	0.0	0.0	0.0	0.0	0.0	0.0	0.0	0.0	0.0	0.0	0.0	0.0
UBE2E3	10477	symbol	H. sapiens	10477	H. sapiens	UBE2E3	ubiquitin conjugating enzyme E2 E3	GO:0070979 protein K11-linked ubiquitination;GO:0070534 protein K63-linked ubiquitination;GO:0070936 protein K48-linked ubiquitination		Predicted intracellular proteins; Enzymes; ENZYME proteins:Transferases					0.0	0.0	0.0	0.0	0.0	0.0	0.0	0.0	0.0	0.0	0.0	0.0	0.0	0.0	0.0	0.0	0.0	0.0	0.0	0.0
ZNF589	51385	symbol	H. sapiens	51385	H. sapiens	ZNF589	zinc finger protein 589	GO:0000122 negative regulation of transcription by RNA polymerase II;GO:0045892 negative regulation of transcription, DNA-templated;GO:1903507 negative regulation of nucleic acid-templated transcription		Transcription factors:Zinc-coordinating DNA-binding domains; Predicted intracellular proteins	Nucleoplasm (Supported)				0.0	0.0	0.0	0.0	0.0	0.0	0.0	0.0	0.0	0.0	0.0	0.0	0.0	0.0	0.0	0.0	0.0	0.0	0.0	0.0
NRD1	4898	gene_synonym	H. sapiens	4898	H. sapiens	NRDC	nardilysin convertase	GO:0051044 positive regulation of membrane protein ectodomain proteolysis;GO:0051043 regulation of membrane protein ectodomain proteolysis;GO:0006509 membrane protein ectodomain proteolysis		Predicted intracellular proteins; Peptidases:Metallopeptidases; Enzymes; ENZYME proteins:Hydrolases	Nucleoplasm (Approved)				0.0	0.0	0.0	0.0	0.0	0.0	0.0	0.0	1.0	0.0	0.0	0.0	0.0	0.0	0.0	0.0	0.0	0.0	0.0	0.0
C5orf51	285636	gene_synonym	H. sapiens	285636	H. sapiens	RIMOC1	RAB7A interacting MON1-CCZ1 complex subunit 1			Predicted intracellular proteins	Nucleoplasm (Enhanced); Additional: Cytosol				0.0	0.0	0.0	0.0	0.0	0.0	0.0	0.0	0.0	0.0	0.0	0.0	0.0	0.0	0.0	0.0	0.0	0.0	0.0	0.0
R3HDM1	23518	symbol	H. sapiens	23518	H. sapiens	R3HDM1	R3H domain containing 1			Predicted intracellular proteins	Cytosol;Nucleoplasm (Approved)				0.0	0.0	0.0	0.0	0.0	0.0	0.0	0.0	0.0	0.0	0.0	0.0	0.0	0.0	0.0	0.0	0.0	0.0	0.0	0.0
PIK3R4	30849	symbol	H. sapiens	30849	H. sapiens	PIK3R4	phosphoinositide-3-kinase regulatory subunit 4	GO:0030242 autophagy of peroxisome;GO:0045324 late endosome to vacuole transport;GO:0032801 receptor catabolic process	Other	Predicted intracellular proteins; Enzymes; Kinases; ENZYME proteins:Transferases	Vesicles (Approved); Additional: Microtubules				0.0	0.0	1.0	1.0	0.0	0.0	1.0	0.0	0.0	0.0	0.0	0.0	0.0	0.0	0.0	0.0	0.0	0.0	1.0	1.0
NUDT12	83594	symbol	H. sapiens	83594	H. sapiens	NUDT12	nudix hydrolase 12	GO:0110155 NAD-cap decapping;GO:0019677 NAD catabolic process;GO:0006742 NADP catabolic process		Predicted intracellular proteins; Enzymes; ENZYME proteins:Hydrolases				(M5948)HALLMARK BILE ACID METABOLISM	1.0	0.0	0.0	0.0	0.0	0.0	0.0	0.0	1.0	0.0	0.0	0.0	0.0	0.0	0.0	0.0	0.0	0.0	0.0	0.0
PBRM1	55193	symbol	H. sapiens	55193	H. sapiens	PBRM1	polybromo 1	GO:0006338 chromatin remodeling;GO:0006325 chromatin organization;GO:0008285 negative regulation of cell population proliferation		Disease related genes; Predicted intracellular proteins; Cancer-related genes:Mutational cancer driver genes; Cancer-related genes:Mutated cancer genes; Transcription factors:Other all-alpha-helical DNA-binding domains	Nucleoplasm (Enhanced)				0.0	0.0	0.0	0.0	0.0	1.0	0.0	0.0	0.0	0.0	0.0	0.0	0.0	0.0	0.0	0.0	0.0	0.0	0.0	0.0
TBC1D15	64786	symbol	H. sapiens	64786	H. sapiens	TBC1D15	TBC1 domain family member 15	GO:1902017 regulation of cilium assembly;GO:0090630 activation of GTPase activity;GO:1902115 regulation of organelle assembly		Predicted intracellular proteins	Cytosol;Mitochondria (Supported)				0.0	0.0	1.0	0.0	0.0	0.0	0.0	0.0	0.0	0.0	0.0	0.0	0.0	0.0	1.0	0.0	0.0	0.0	0.0	0.0
GLTSCR1L	23506	gene_synonym	H. sapiens	23506	H. sapiens	BICRAL	BICRA like chromatin remodeling complex associated protein	GO:0045893 positive regulation of transcription, DNA-templated;GO:1903508 positive regulation of nucleic acid-templated transcription;GO:1902680 positive regulation of RNA biosynthetic process		Predicted intracellular proteins	Nucleoplasm (Supported)				0.0	0.0	0.0	0.0	0.0	0.0	0.0	0.0	0.0	0.0	0.0	0.0	0.0	0.0	0.0	0.0	0.0	0.0	0.0	0.0
ANXA4	307	symbol	H. sapiens	307	H. sapiens	ANXA4	annexin A4	GO:0032717 negative regulation of interleukin-8 production;GO:0032088 negative regulation of NF-kappaB transcription factor activity;GO:0032677 regulation of interleukin-8 production		Predicted intracellular proteins; Cancer-related genes:Candidate cancer biomarkers	Cytosol (Approved)	Fluocinolone acetonide; Copper	(M5880)NABA ECM AFFILIATED; (M5885)NABA MATRISOME ASSOCIATED; (M5889)NABA MATRISOME	(M5942)HALLMARK UV RESPONSE DN; (M5947)HALLMARK IL2 STAT5 SIGNALING	0.0	0.0	0.0	0.0	0.0	0.0	0.0	0.0	0.0	0.0	0.0	0.0	0.0	0.0	0.0	0.0	0.0	0.0	0.0	0.0
QSER1	79832	symbol	H. sapiens	79832	H. sapiens	QSER1	glutamine and serine rich 1			Predicted intracellular proteins	Nucleoplasm (Approved); Additional: Cytosol				0.0	0.0	0.0	0.0	0.0	0.0	0.0	0.0	0.0	0.0	0.0	0.0	0.0	0.0	0.0	0.0	0.0	0.0	0.0	0.0
IRAK3	11213	symbol	H. sapiens	11213	H. sapiens	IRAK3	interleukin 1 receptor associated kinase 3	GO:0010931 macrophage tolerance induction;GO:0010932 regulation of macrophage tolerance induction;GO:0010933 positive regulation of macrophage tolerance induction	TKL Ser/Thr protein kinase family	Disease related genes; ENZYME proteins:Transferases; Predicted intracellular proteins; Potential drug targets; Kinases:TKL Ser/Thr protein kinases; Enzymes	Vesicles (Approved)	Fostamatinib	(M110)PID IL1 PATHWAY		0.0	0.0	0.0	0.0	0.0	0.0	0.0	0.0	0.0	0.0	0.0	0.0	0.0	0.0	0.0	0.0	0.0	0.0	0.0	1.0
DNAJC13	23317	symbol	H. sapiens	23317	H. sapiens	DNAJC13	DnaJ heat shock protein family (Hsp40) member C13	GO:1902954 regulation of early endosome to recycling endosome transport;GO:0061502 early endosome to recycling endosome transport;GO:2000641 regulation of early endosome to late endosome transport			Vesicles (Supported); Additional: Cytosol				0.0	0.0	0.0	0.0	0.0	0.0	1.0	0.0	0.0	0.0	0.0	0.0	0.0	0.0	0.0	0.0	0.0	0.0	0.0	0.0
CWC27	10283	symbol	H. sapiens	10283	H. sapiens	CWC27	CWC27 spliceosome associated cyclophilin	GO:0000413 protein peptidyl-prolyl isomerization;GO:0018208 peptidyl-proline modification;GO:0006457 protein folding		Disease related genes; Predicted intracellular proteins; Potential drug targets; ENZYME proteins:Isomerase; Enzymes	Nucleoplasm (Enhanced)				1.0	0.0	0.0	0.0	0.0	0.0	0.0	0.0	0.0	0.0	0.0	0.0	0.0	0.0	0.0	0.0	0.0	0.0	0.0	0.0
ITGAE	3682	symbol	H. sapiens	3682	H. sapiens	ITGAE	integrin subunit alpha E	GO:0007229 integrin-mediated signaling pathway;GO:0007155 cell adhesion;GO:0022610 biological adhesion		CD markers; Predicted intracellular proteins			(M47)PID INTEGRIN CS PATHWAY; (M156)PID ECADHERIN NASCENT AJ PATHWAY	(M5947)HALLMARK IL2 STAT5 SIGNALING	0.0	0.0	0.0	0.0	0.0	0.0	0.0	0.0	0.0	0.0	0.0	0.0	0.0	0.0	0.0	0.0	0.0	0.0	0.0	0.0
CPS1	1373	symbol	H. sapiens	1373	H. sapiens	CPS1	carbamoyl-phosphate synthase 1	GO:0070408 carbamoyl phosphate metabolic process;GO:0070409 carbamoyl phosphate biosynthetic process;GO:0071400 cellular response to oleic acid		Disease related genes; ENZYME proteins:Ligase; Predicted intracellular proteins; FDA approved drug targets:Small molecule drugs; Enzymes	Nucleoli;Nucleoli rim (Supported)	Carglumic acid			0.0	0.0	0.0	0.0	0.0	0.0	0.0	0.0	0.0	0.0	0.0	0.0	0.0	0.0	0.0	0.0	0.0	0.0	0.0	0.0
IPO9	55705	symbol	H. sapiens	55705	H. sapiens	IPO9	importin 9	GO:0006606 protein import into nucleus;GO:0051170 import into nucleus;GO:0017038 protein import		Predicted intracellular proteins; Transporters:Transporter channels and pores	Cytosol (Approved); Additional: Vesicles				0.0	0.0	0.0	0.0	0.0	0.0	1.0	0.0	0.0	0.0	0.0	0.0	0.0	0.0	0.0	0.0	0.0	0.0	0.0	0.0
LOX	4015	symbol	H. sapiens	4015	H. sapiens	LOX	lysyl oxidase	GO:0035906 descending aorta development;GO:0035905 ascending aorta development;GO:0018057 peptidyl-lysine oxidation		Disease related genes; ENZYME proteins:Oxidoreductases; Potential drug targets; Predicted secreted proteins; Enzymes	Endoplasmic reticulum (Approved)		(M3468)NABA ECM REGULATORS; (M5885)NABA MATRISOME ASSOCIATED; (M5889)NABA MATRISOME	(M5891)HALLMARK HYPOXIA; (M5930)HALLMARK EPITHELIAL MESENCHYMAL TRANSITION	0.0	0.0	0.0	0.0	0.0	1.0	0.0	0.0	0.0	0.0	0.0	0.0	0.0	1.0	0.0	0.0	0.0	0.0	0.0	1.0
RAD17	5884	symbol	H. sapiens	5884	H. sapiens	RAD17	RAD17 checkpoint clamp loader component	GO:0033314 mitotic DNA replication checkpoint signaling;GO:0000076 DNA replication checkpoint signaling;GO:0031573 mitotic intra-S DNA damage checkpoint signaling		Predicted intracellular proteins	Nucleoplasm (Enhanced)		(M84)PID ATM PATHWAY; (M46)PID ATR PATHWAY; (M1)PID FANCONI PATHWAY	(M5951)HALLMARK SPERMATOGENESIS	0.0	1.0	0.0	1.0	0.0	0.0	0.0	0.0	0.0	0.0	0.0	0.0	0.0	1.0	0.0	0.0	0.0	0.0	0.0	0.0
TTC14	151613	symbol	H. sapiens	151613	H. sapiens	TTC14	tetratricopeptide repeat domain 14			Predicted intracellular proteins	Nucleoplasm (Approved)				0.0	0.0	0.0	0.0	0.0	0.0	0.0	0.0	0.0	0.0	0.0	0.0	0.0	0.0	0.0	0.0	0.0	0.0	0.0	0.0
NIF3L1	60491	symbol	H. sapiens	60491	H. sapiens	NIF3L1	NGG1 interacting factor 3 like 1	GO:1903507 negative regulation of nucleic acid-templated transcription;GO:1902679 negative regulation of RNA biosynthetic process;GO:0030182 neuron differentiation		Predicted intracellular proteins	Vesicles (Approved)				0.0	0.0	0.0	0.0	0.0	0.0	0.0	0.0	0.0	0.0	0.0	0.0	0.0	0.0	0.0	0.0	0.0	0.0	0.0	0.0
HNRNPU-AS1	3192	gene_synonym	H. sapiens	3192	H. sapiens	HNRNPU	heterogeneous nuclear ribonucleoprotein U	GO:1902889 protein localization to spindle microtubule;GO:1990280 RNA localization to chromatin;GO:0098961 dendritic transport of ribonucleoprotein complex		Predicted intracellular proteins; Disease related genes	Nucleoplasm (Enhanced)			(M5941)HALLMARK UV RESPONSE UP; (M5901)HALLMARK G2M CHECKPOINT; (M5926)HALLMARK MYC TARGETS V1	1.0	0.0	0.0	1.0	1.0	0.0	1.0	0.0	1.0	0.0	0.0	1.0	1.0	1.0	1.0	0.0	0.0	1.0	0.0	0.0
RHBDD1	84236	symbol	H. sapiens	84236	H. sapiens	RHBDD1	rhomboid domain containing 1	GO:1904211 membrane protein proteolysis involved in retrograde protein transport, ER to cytosol;GO:1905936 regulation of germ cell proliferation;GO:2000254 regulation of male germ cell proliferation		Peptidases:Serine-type peptidases; Predicted intracellular proteins; Transporters; ENZYME proteins:Hydrolases; Enzymes	Endoplasmic reticulum (Supported)				0.0	0.0	0.0	0.0	0.0	0.0	0.0	0.0	0.0	0.0	1.0	0.0	0.0	0.0	0.0	1.0	0.0	0.0	0.0	0.0
SCYL3	57147	symbol	H. sapiens	57147	H. sapiens	SCYL3	SCY1 like pseudokinase 3	GO:0021522 spinal cord motor neuron differentiation;GO:0021517 ventral spinal cord development;GO:0021515 cell differentiation in spinal cord	Other	Predicted intracellular proteins; Enzymes; Kinases	Microtubules (Uncertain); Additional: Nuclear bodies				0.0	0.0	0.0	0.0	0.0	0.0	0.0	0.0	0.0	0.0	0.0	0.0	0.0	0.0	0.0	0.0	0.0	0.0	0.0	0.0
HSF2	3298	symbol	H. sapiens	3298	H. sapiens	HSF2	heat shock transcription factor 2	GO:0007283 spermatogenesis;GO:0048232 male gamete generation;GO:0007276 gamete generation		Predicted intracellular proteins; Transcription factors:Helix-turn-helix domains	Nucleoplasm (Supported)		(M200)PID ERA GENOMIC PATHWAY		0.0	0.0	0.0	0.0	0.0	0.0	0.0	0.0	0.0	0.0	0.0	0.0	0.0	0.0	0.0	1.0	0.0	0.0	0.0	0.0
IL16	3603	symbol	H. sapiens	3603	H. sapiens	IL16	interleukin 16	GO:0032730 positive regulation of interleukin-1 alpha production;GO:0032610 interleukin-1 alpha production;GO:0032650 regulation of interleukin-1 alpha production		Predicted intracellular proteins; Predicted secreted proteins; Cancer-related genes:Candidate cancer biomarkers	Nuclear speckles (Supported); Additional: Cytosol;Plasma membrane		(M5883)NABA SECRETED FACTORS; (M5885)NABA MATRISOME ASSOCIATED; (M5889)NABA MATRISOME	(M5950)HALLMARK ALLOGRAFT REJECTION	0.0	0.0	0.0	0.0	0.0	0.0	0.0	0.0	0.0	0.0	0.0	0.0	0.0	0.0	0.0	0.0	0.0	0.0	0.0	1.0
LOC100506127	100506127	Gene_ID	H. sapiens	100506127	H. sapiens	GVQW3	GVQW motif containing 3			Predicted intracellular proteins	Centrosome;Nucleoplasm (Approved); Additional: Endoplasmic reticulum				0.0	0.0	0.0	0.0	0.0	0.0	0.0	0.0	0.0	0.0	0.0	0.0	0.0	0.0	0.0	0.0	0.0	0.0	0.0	0.0
ZNF567	163081	symbol	H. sapiens	163081	H. sapiens	ZNF567	zinc finger protein 567	GO:0006357 regulation of transcription by RNA polymerase II;GO:0006366 transcription by RNA polymerase II;GO:0006355 regulation of transcription, DNA-templated		Transcription factors:Zinc-coordinating DNA-binding domains; Predicted intracellular proteins	Nucleoplasm (Approved); Additional: Cytosol				0.0	0.0	0.0	0.0	0.0	0.0	0.0	0.0	0.0	0.0	0.0	0.0	0.0	0.0	0.0	0.0	0.0	0.0	0.0	0.0
DEPDC7	91614	symbol	H. sapiens	91614	H. sapiens	DEPDC7	DEP domain containing 7	GO:0035556 intracellular signal transduction;GO:0007165 signal transduction;GO:0023052 signaling		Predicted intracellular proteins	Nucleoli (Approved); Additional: Cytosol;Nucleoplasm				0.0	0.0	0.0	0.0	0.0	0.0	0.0	0.0	0.0	0.0	0.0	0.0	0.0	0.0	0.0	0.0	0.0	0.0	0.0	0.0
C10orf11	83938	gene_synonym	H. sapiens	83938	H. sapiens	LRMDA	leucine rich melanocyte differentiation associated	GO:0030318 melanocyte differentiation;GO:0050931 pigment cell differentiation;GO:0048066 developmental pigmentation		Predicted intracellular proteins; Disease related genes	Nucleoplasm (Supported); Additional: Cytosol				0.0	0.0	0.0	0.0	0.0	0.0	0.0	0.0	0.0	0.0	0.0	0.0	0.0	0.0	0.0	0.0	0.0	0.0	0.0	0.0
PRPF39	55015	symbol	H. sapiens	55015	H. sapiens	PRPF39	pre-mRNA processing factor 39	GO:0000395 mRNA 5'-splice site recognition;GO:0045292 mRNA cis splicing, via spliceosome;GO:0006376 mRNA splice site selection		Predicted intracellular proteins	Nucleoplasm (Approved)				1.0	0.0	0.0	0.0	0.0	0.0	0.0	0.0	0.0	0.0	0.0	0.0	0.0	0.0	0.0	0.0	0.0	0.0	0.0	0.0
LANCL1	10314	symbol	H. sapiens	10314	H. sapiens	LANCL1	LanC like 1	GO:1903203 regulation of oxidative stress-induced neuron death;GO:0036475 neuron death in response to oxidative stress;GO:1903201 regulation of oxidative stress-induced cell death		Predicted intracellular proteins	Microtubules (Uncertain)				0.0	0.0	0.0	0.0	0.0	0.0	0.0	0.0	0.0	0.0	0.0	0.0	0.0	0.0	0.0	0.0	0.0	0.0	0.0	0.0
TMEM176B	28959	symbol	H. sapiens	28959	H. sapiens	TMEM176B	transmembrane protein 176B	GO:2001199 negative regulation of dendritic cell differentiation;GO:2001198 regulation of dendritic cell differentiation;GO:0097028 dendritic cell differentiation			Golgi apparatus (Approved); Additional: Nucleoplasm;Plasma membrane			(M5934)HALLMARK XENOBIOTIC METABOLISM; (M5953)HALLMARK KRAS SIGNALING UP	0.0	0.0	0.0	0.0	0.0	0.0	0.0	0.0	0.0	0.0	0.0	0.0	0.0	0.0	0.0	0.0	0.0	0.0	0.0	0.0
DNM3	26052	symbol	H. sapiens	26052	H. sapiens	DNM3	dynamin 3	GO:0061002 negative regulation of dendritic spine morphogenesis;GO:1903423 positive regulation of synaptic vesicle recycling;GO:0061000 negative regulation of dendritic spine development		Predicted intracellular proteins; Enzymes; ENZYME proteins:Hydrolases	Golgi apparatus (Approved)				0.0	0.0	1.0	0.0	0.0	0.0	0.0	0.0	0.0	0.0	0.0	0.0	1.0	0.0	0.0	0.0	0.0	0.0	1.0	1.0
NBN	4683	symbol	H. sapiens	4683	H. sapiens	NBN	nibrin	GO:0031860 telomeric 3' overhang formation;GO:0030174 regulation of DNA-dependent DNA replication initiation;GO:1904354 negative regulation of telomere capping		Predicted intracellular proteins; Disease related genes; Cancer-related genes	Golgi apparatus (Approved); Additional: Nucleoplasm		(M258)PID BARD1 PATHWAY; (M84)PID ATM PATHWAY; (M46)PID ATR PATHWAY	(M5935)HALLMARK FATTY ACID METABOLISM; (M5925)HALLMARK E2F TARGETS	0.0	1.0	0.0	1.0	0.0	0.0	0.0	1.0	0.0	0.0	0.0	0.0	0.0	1.0	0.0	0.0	0.0	0.0	0.0	0.0
USP49	25862	symbol	H. sapiens	25862	H. sapiens	USP49	ubiquitin specific peptidase 49	GO:0035616 histone H2B conserved C-terminal lysine deubiquitination;GO:0016578 histone deubiquitination;GO:0016579 protein deubiquitination		Predicted intracellular proteins; Peptidases:Cysteine-type peptidases; Enzymes; ENZYME proteins:Hydrolases					1.0	0.0	0.0	0.0	0.0	1.0	0.0	0.0	0.0	0.0	1.0	0.0	0.0	0.0	0.0	0.0	0.0	0.0	0.0	0.0
SLC41A1	254428	symbol	H. sapiens	254428	H. sapiens	SLC41A1	solute carrier family 41 member 1	GO:0010961 cellular magnesium ion homeostasis;GO:0071286 cellular response to magnesium ion;GO:0010960 magnesium ion homeostasis		Transporters:Transporter channels and pores	Mitochondria (Approved)				0.0	0.0	0.0	0.0	0.0	0.0	0.0	0.0	0.0	0.0	0.0	0.0	0.0	0.0	0.0	0.0	0.0	0.0	0.0	0.0
FAM134B	54463	gene_synonym	H. sapiens	54463	H. sapiens	RETREG1	reticulophagy regulator 1	GO:0050872 white fat cell differentiation;GO:0061709 reticulophagy;GO:0000423 mitophagy		Disease related genes	Endoplasmic reticulum (Supported)			(M5906)HALLMARK ESTROGEN RESPONSE EARLY	0.0	0.0	0.0	0.0	0.0	0.0	0.0	0.0	0.0	0.0	0.0	0.0	0.0	0.0	0.0	0.0	0.0	0.0	0.0	0.0
NEK11	79858	symbol	H. sapiens	79858	H. sapiens	NEK11	NIMA related kinase 11	GO:0031573 mitotic intra-S DNA damage checkpoint signaling;GO:0016572 histone phosphorylation;GO:0044773 mitotic DNA damage checkpoint signaling	NEK Ser/Thr protein kinase family	Predicted intracellular proteins; Kinases:NEK Ser/Thr protein kinases; Enzymes; ENZYME proteins:Transferases	Nucleoplasm (Supported)	Dabrafenib; Fostamatinib			0.0	1.0	0.0	0.0	0.0	1.0	0.0	0.0	0.0	0.0	0.0	0.0	0.0	0.0	0.0	0.0	0.0	1.0	0.0	0.0
ITGB3BP	23421	symbol	H. sapiens	23421	H. sapiens	ITGB3BP	integrin subunit beta 3 binding protein	GO:0034080 CENP-A containing nucleosome assembly;GO:0061641 CENP-A containing chromatin organization;GO:0031055 chromatin remodeling at centromere		Predicted intracellular proteins	Nucleoplasm (Supported)				0.0	0.0	0.0	1.0	0.0	0.0	0.0	0.0	0.0	0.0	0.0	0.0	0.0	1.0	0.0	0.0	0.0	0.0	0.0	0.0
CALU	813	symbol	H. sapiens	813	H. sapiens	CALU	calumenin	GO:0008150 biological_process		Predicted intracellular proteins	Endoplasmic reticulum (Supported)			(M5930)HALLMARK EPITHELIAL MESENCHYMAL TRANSITION	0.0	0.0	0.0	0.0	0.0	0.0	0.0	0.0	0.0	0.0	0.0	0.0	0.0	0.0	0.0	0.0	0.0	0.0	0.0	0.0
SLFN12	55106	symbol	H. sapiens	55106	H. sapiens	SLFN12	schlafen family member 12			Predicted intracellular proteins					0.0	0.0	0.0	0.0	0.0	0.0	0.0	0.0	0.0	0.0	0.0	0.0	0.0	0.0	0.0	0.0	0.0	0.0	0.0	0.0
ATG5	9474	symbol	H. sapiens	9474	H. sapiens	ATG5	autophagy related 5	GO:0039689 negative stranded viral RNA replication;GO:2000619 negative regulation of histone H4-K16 acetylation;GO:0061739 protein lipidation involved in autophagosome assembly		Transporters; Potential drug targets; Disease related genes; Predicted intracellular proteins	Centrosome (Approved)				0.0	0.0	1.0	0.0	0.0	1.0	0.0	0.0	0.0	1.0	0.0	0.0	0.0	0.0	1.0	0.0	0.0	0.0	0.0	1.0
ORC2	4999	symbol	H. sapiens	4999	H. sapiens	ORC2	origin recognition complex subunit 2	GO:0006270 DNA replication initiation;GO:0006261 DNA-dependent DNA replication;GO:0006260 DNA replication		Predicted intracellular proteins	Nucleoplasm (Supported); Additional: Cytosol			(M5925)HALLMARK E2F TARGETS; (M5926)HALLMARK MYC TARGETS V1	0.0	0.0	0.0	1.0	0.0	0.0	0.0	0.0	0.0	0.0	0.0	0.0	0.0	1.0	0.0	0.0	0.0	0.0	0.0	0.0
KRCC1	51315	symbol	H. sapiens	51315	H. sapiens	KRCC1	lysine rich coiled-coil 1			Predicted intracellular proteins	Cytosol (Approved); Additional: Nucleoli				0.0	0.0	0.0	0.0	0.0	0.0	0.0	0.0	0.0	0.0	0.0	0.0	0.0	0.0	0.0	0.0	0.0	0.0	0.0	0.0
MKL2	57496	gene_synonym	H. sapiens	57496	H. sapiens	MRTFB	myocardin related transcription factor B	GO:0045844 positive regulation of striated muscle tissue development;GO:0048636 positive regulation of muscle organ development;GO:1901863 positive regulation of muscle tissue development		Predicted intracellular proteins; Disease related genes	Nuclear speckles (Supported)				0.0	0.0	0.0	0.0	0.0	0.0	0.0	0.0	0.0	0.0	0.0	0.0	0.0	0.0	0.0	0.0	0.0	0.0	0.0	0.0
ZNF397	84307	symbol	H. sapiens	84307	H. sapiens	ZNF397	zinc finger protein 397	GO:0006357 regulation of transcription by RNA polymerase II;GO:0006366 transcription by RNA polymerase II;GO:0006355 regulation of transcription, DNA-templated		Transcription factors:Zinc-coordinating DNA-binding domains; Predicted intracellular proteins	Cytosol;Nucleoli;Plasma membrane (Approved); Additional: Microtubules				0.0	0.0	0.0	0.0	0.0	0.0	0.0	0.0	0.0	0.0	0.0	0.0	0.0	0.0	0.0	0.0	0.0	0.0	0.0	0.0
ELMO2	63916	symbol	H. sapiens	63916	H. sapiens	ELMO2	engulfment and cell motility 2	GO:0006909 phagocytosis;GO:0060326 cell chemotaxis;GO:0007015 actin filament organization		Predicted intracellular proteins; Disease related genes	Cytosol (Supported)		(M71)PID ILK PATHWAY		0.0	0.0	0.0	0.0	0.0	0.0	0.0	0.0	0.0	0.0	0.0	0.0	0.0	0.0	0.0	0.0	0.0	0.0	1.0	1.0
CTR9	9646	symbol	H. sapiens	9646	H. sapiens	CTR9	CTR9 homolog, Paf1/RNA polymerase II complex component	GO:2001162 positive regulation of histone H3-K79 methylation;GO:2001160 regulation of histone H3-K79 methylation;GO:2001168 positive regulation of histone H2B ubiquitination		Predicted intracellular proteins	Nucleoplasm (Enhanced)				1.0	0.0	0.0	0.0	1.0	1.0	0.0	0.0	0.0	1.0	0.0	0.0	0.0	0.0	0.0	0.0	0.0	0.0	0.0	0.0
SNX5	27131	symbol	H. sapiens	27131	H. sapiens	SNX5	sorting nexin 5	GO:0007174 epidermal growth factor catabolic process;GO:0035815 positive regulation of renal sodium excretion;GO:0035813 regulation of renal sodium excretion		Predicted intracellular proteins	Cytosol;Vesicles (Supported)				0.0	0.0	0.0	0.0	0.0	0.0	0.0	0.0	0.0	0.0	0.0	0.0	0.0	0.0	0.0	0.0	0.0	0.0	0.0	0.0
CHDH	55349	symbol	H. sapiens	55349	H. sapiens	CHDH	choline dehydrogenase	GO:0019285 glycine betaine biosynthetic process from choline;GO:0031455 glycine betaine metabolic process;GO:0031456 glycine betaine biosynthetic process		ENZYME proteins:Oxidoreductases; Predicted intracellular proteins; Enzymes					0.0	0.0	0.0	0.0	0.0	0.0	0.0	0.0	0.0	0.0	0.0	0.0	0.0	0.0	0.0	0.0	0.0	0.0	0.0	0.0
CYP2R1	120227	symbol	H. sapiens	120227	H. sapiens	CYP2R1	cytochrome P450 family 2 subfamily R member 1	GO:0010164 response to cesium ion;GO:0036378 calcitriol biosynthetic process from calciol;GO:0044107 cellular alcohol metabolic process		Disease related genes; Predicted intracellular proteins; ENZYME proteins:Oxidoreductases; Potential drug targets; Enzymes					0.0	0.0	0.0	0.0	0.0	0.0	0.0	0.0	0.0	0.0	0.0	0.0	0.0	0.0	0.0	0.0	0.0	0.0	0.0	0.0
WDR11	55717	symbol	H. sapiens	55717	H. sapiens	WDR11	WD repeat domain 11	GO:0099041 vesicle tethering to Golgi;GO:0099022 vesicle tethering;GO:0006903 vesicle targeting		Predicted intracellular proteins; Disease related genes	Cytosol;Microtubules (Approved)				0.0	0.0	1.0	0.0	0.0	0.0	0.0	0.0	0.0	0.0	0.0	0.0	0.0	0.0	0.0	0.0	0.0	0.0	0.0	0.0
NR2C1	7181	symbol	H. sapiens	7181	H. sapiens	NR2C1	nuclear receptor subfamily 2 group C member 1	GO:0048386 positive regulation of retinoic acid receptor signaling pathway;GO:0048385 regulation of retinoic acid receptor signaling pathway;GO:0048384 retinoic acid receptor signaling pathway		Transcription factors:Zinc-coordinating DNA-binding domains; Predicted intracellular proteins; Nuclear receptors	Nucleoplasm (Supported); Additional: Cell Junctions;Cytosol		(M151)PID AR TF PATHWAY; (M101)PID HDAC CLASSI PATHWAY		0.0	0.0	0.0	0.0	0.0	0.0	0.0	0.0	0.0	0.0	0.0	0.0	0.0	0.0	0.0	0.0	0.0	0.0	0.0	0.0
DZANK1	55184	symbol	H. sapiens	55184	H. sapiens	DZANK1	double zinc ribbon and ankyrin repeat domains 1	GO:0042462 eye photoreceptor cell development;GO:0001754 eye photoreceptor cell differentiation;GO:0042461 photoreceptor cell development		Predicted intracellular proteins	Nucleoli fibrillar center (Approved)				0.0	0.0	0.0	0.0	0.0	0.0	0.0	0.0	0.0	0.0	0.0	0.0	0.0	0.0	0.0	0.0	0.0	0.0	0.0	0.0
CCDC53	51019	gene_synonym	H. sapiens	51019	H. sapiens	WASHC3	WASH complex subunit 3	GO:0030041 actin filament polymerization;GO:0008154 actin polymerization or depolymerization;GO:0051258 protein polymerization		Predicted intracellular proteins	Vesicles (Approved)				0.0	0.0	0.0	0.0	0.0	0.0	0.0	0.0	0.0	0.0	0.0	0.0	0.0	0.0	0.0	0.0	0.0	0.0	0.0	0.0
CTSK	1513	symbol	H. sapiens	1513	H. sapiens	CTSK	cathepsin K	GO:0001957 intramembranous ossification;GO:0036072 direct ossification;GO:0006590 thyroid hormone generation		Disease related genes; Predicted intracellular proteins; Peptidases:Cysteine-type peptidases; Potential drug targets; ENZYME proteins:Hydrolases; Enzymes	Vesicles (Supported)	[1-(4-Fluorobenzyl)Cyclobutyl]Methyl (1s)-1-[Oxo(1h-Pyrazol-5-Ylamino)Acetyl]Pentylcarbamate; Cyanamide; 3-amino-5-phenylpentane; N2-[(Benzyloxy)carbonyl]-N-[(3R)-1-{N-[(benzyloxy)carbonyl]-L-leucyl}-4-oxo-3-pyrrolidinyl]-L-leucinamide; N2-[(benzyloxy)carbonyl]-n1-[(3S)-1-cyanopyrrolidin-3-yl]-l-leucinamide; N-[(2S)-4-Methyl-1-oxo-1-{[(4S)-3-oxo-1-(2-pyridinylsulfonyl)-4-azepanyl]amino}-2-pentany…	(M3468)NABA ECM REGULATORS; (M5885)NABA MATRISOME ASSOCIATED; (M5889)NABA MATRISOME	(M5946)HALLMARK COAGULATION	0.0	0.0	0.0	0.0	0.0	0.0	0.0	0.0	0.0	0.0	1.0	0.0	0.0	0.0	0.0	0.0	0.0	0.0	0.0	1.0
GOLM1	51280	symbol	H. sapiens	51280	H. sapiens	GOLM1	golgi membrane protein 1	GO:0006997 nucleus organization;GO:0019216 regulation of lipid metabolic process;GO:0006629 lipid metabolic process		Predicted intracellular proteins	Golgi apparatus (Enhanced)				0.0	0.0	0.0	0.0	0.0	0.0	0.0	0.0	0.0	0.0	0.0	0.0	0.0	0.0	0.0	0.0	0.0	0.0	0.0	0.0
ARHGAP19	84986	symbol	H. sapiens	84986	H. sapiens	ARHGAP19	Rho GTPase activating protein 19	GO:0051056 regulation of small GTPase mediated signal transduction;GO:0007264 small GTPase mediated signal transduction;GO:1902531 regulation of intracellular signal transduction		Predicted intracellular proteins	Plasma membrane (Enhanced)				0.0	0.0	0.0	0.0	0.0	0.0	0.0	0.0	0.0	0.0	0.0	0.0	0.0	0.0	0.0	0.0	0.0	0.0	0.0	0.0
CEP126	57562	symbol	H. sapiens	57562	H. sapiens	CEP126	centrosomal protein 126	GO:0031122 cytoplasmic microtubule organization;GO:1905515 non-motile cilium assembly;GO:0007052 mitotic spindle organization		Predicted intracellular proteins	Cytosol;Nucleoplasm (Uncertain)				0.0	0.0	1.0	0.0	0.0	0.0	0.0	0.0	0.0	0.0	0.0	1.0	0.0	0.0	0.0	0.0	0.0	0.0	0.0	0.0
R3HCC1L	27291	symbol	H. sapiens	27291	H. sapiens	R3HCC1L	R3H domain and coiled-coil containing 1 like			Predicted intracellular proteins	Nuclear speckles;Nucleoplasm (Approved)				0.0	0.0	0.0	0.0	0.0	0.0	0.0	0.0	0.0	0.0	0.0	0.0	0.0	0.0	0.0	0.0	0.0	0.0	0.0	0.0
SMARCAL1	50485	symbol	H. sapiens	50485	H. sapiens	SMARCAL1	SWI/SNF related, matrix associated, actin dependent regulator of chromatin, subfamily a like 1	GO:0048478 replication fork protection;GO:2000104 negative regulation of DNA-dependent DNA replication;GO:0001325 formation of extrachromosomal circular DNA		Predicted intracellular proteins; Disease related genes	Nucleoplasm (Supported)		(M46)PID ATR PATHWAY		0.0	1.0	0.0	0.0	0.0	0.0	0.0	0.0	0.0	0.0	0.0	0.0	0.0	1.0	0.0	0.0	0.0	0.0	0.0	0.0
VWA9	81556	gene_synonym	H. sapiens	81556	H. sapiens	INTS14	integrator complex subunit 14	GO:0034472 snRNA 3'-end processing;GO:0016180 snRNA processing;GO:0016073 snRNA metabolic process		Predicted intracellular proteins	Mitochondria;Nuclear bodies;Nucleoplasm (Approved); Additional: Nuclear membrane		(M3008)NABA ECM GLYCOPROTEINS; (M5884)NABA CORE MATRISOME; (M5889)NABA MATRISOME		0.0	0.0	0.0	0.0	1.0	0.0	0.0	0.0	0.0	0.0	0.0	0.0	0.0	0.0	0.0	0.0	0.0	0.0	0.0	0.0
TMEM116	89894	symbol	H. sapiens	89894	H. sapiens	TMEM116	transmembrane protein 116	GO:0008150 biological_process		Predicted intracellular proteins	Microtubules (Approved); Additional: Nucleoplasm				0.0	0.0	0.0	0.0	0.0	0.0	0.0	0.0	0.0	0.0	0.0	0.0	0.0	0.0	0.0	0.0	0.0	0.0	0.0	0.0
TTC8	123016	symbol	H. sapiens	123016	H. sapiens	TTC8	tetratricopeptide repeat domain 8	GO:0048560 establishment of anatomical structure orientation;GO:0050893 sensory processing;GO:1903251 multi-ciliated epithelial cell differentiation		Predicted intracellular proteins; Disease related genes					0.0	0.0	1.0	0.0	0.0	0.0	0.0	0.0	0.0	0.0	0.0	0.0	0.0	0.0	0.0	0.0	0.0	0.0	0.0	0.0
DCN	1634	symbol	H. sapiens	1634	H. sapiens	DCN	decorin	GO:0019800 peptide cross-linking via chondroitin 4-sulfate glycosaminoglycan;GO:0051901 positive regulation of mitochondrial depolarization;GO:1904181 positive regulation of membrane depolarization		Predicted intracellular proteins; Disease related genes; Predicted secreted proteins; Cancer-related genes:Candidate cancer biomarkers			(M5882)NABA PROTEOGLYCANS; (M65)PID FRA PATHWAY; (M5884)NABA CORE MATRISOME	(M5902)HALLMARK APOPTOSIS; (M5891)HALLMARK HYPOXIA; (M5930)HALLMARK EPITHELIAL MESENCHYMAL TRANSITION	0.0	0.0	0.0	0.0	0.0	0.0	0.0	1.0	1.0	0.0	0.0	0.0	0.0	0.0	0.0	0.0	0.0	1.0	0.0	1.0
HTRA1	5654	symbol	H. sapiens	5654	H. sapiens	HTRA1	HtrA serine peptidase 1	GO:0060718 chorionic trophoblast cell differentiation;GO:0097187 dentinogenesis;GO:0060717 chorion development		Disease related genes; Peptidases:Serine-type peptidases; Predicted intracellular proteins; Potential drug targets; Predicted secreted proteins; Enzymes	Plasma membrane (Supported)		(M3468)NABA ECM REGULATORS; (M5885)NABA MATRISOME ASSOCIATED; (M5889)NABA MATRISOME	(M5946)HALLMARK COAGULATION; (M5930)HALLMARK EPITHELIAL MESENCHYMAL TRANSITION	0.0	0.0	0.0	0.0	0.0	0.0	0.0	0.0	0.0	0.0	0.0	0.0	0.0	0.0	0.0	0.0	0.0	0.0	0.0	0.0
ZC3H12B	340554	symbol	H. sapiens	340554	H. sapiens	ZC3H12B	zinc finger CCCH-type containing 12B	GO:0090502 RNA phosphodiester bond hydrolysis, endonucleolytic;GO:0090501 RNA phosphodiester bond hydrolysis;GO:0090305 nucleic acid phosphodiester bond hydrolysis		Predicted intracellular proteins	Endoplasmic reticulum (Approved); Additional: Golgi apparatus;Vesicles				0.0	0.0	0.0	0.0	0.0	0.0	0.0	0.0	0.0	0.0	0.0	0.0	0.0	0.0	0.0	0.0	0.0	0.0	0.0	0.0
ASAP1	50807	symbol	H. sapiens	50807	H. sapiens	ASAP1	ArfGAP with SH3 domain, ankyrin repeat and PH domain 1	GO:1903527 positive regulation of membrane tubulation;GO:1903525 regulation of membrane tubulation;GO:0071803 positive regulation of podosome assembly		Predicted intracellular proteins	Centrosome;Cytosol;Plasma membrane (Approved)		(M243)PID ARF 3PATHWAY; (M281)PID FAK PATHWAY		0.0	0.0	1.0	0.0	0.0	0.0	0.0	1.0	0.0	0.0	0.0	0.0	0.0	0.0	1.0	0.0	0.0	0.0	1.0	0.0
DAZAP2	9802	symbol	H. sapiens	9802	H. sapiens	DAZAP2	DAZ associated protein 2	GO:0071902 positive regulation of protein serine/threonine kinase activity;GO:0071900 regulation of protein serine/threonine kinase activity;GO:0045860 positive regulation of protein kinase activity		Predicted intracellular proteins	Nuclear speckles (Supported)				0.0	0.0	0.0	0.0	0.0	0.0	0.0	0.0	0.0	0.0	0.0	0.0	0.0	0.0	0.0	0.0	0.0	0.0	0.0	0.0
PNISR	25957	symbol	H. sapiens	25957	H. sapiens	PNISR	PNN interacting serine and arginine rich protein			Predicted intracellular proteins	Nuclear speckles (Supported); Additional: Cytosol;Plasma membrane				0.0	0.0	0.0	0.0	0.0	0.0	0.0	0.0	0.0	0.0	0.0	0.0	0.0	0.0	0.0	0.0	0.0	0.0	0.0	0.0
MTIF3	219402	symbol	H. sapiens	219402	H. sapiens	MTIF3	mitochondrial translational initiation factor 3	GO:0070124 mitochondrial translational initiation;GO:0032790 ribosome disassembly;GO:0032543 mitochondrial translation		Predicted intracellular proteins	Mitochondria (Supported); Additional: Nucleoplasm				0.0	0.0	0.0	0.0	0.0	0.0	0.0	0.0	1.0	0.0	0.0	0.0	0.0	0.0	0.0	0.0	0.0	0.0	0.0	0.0
ZNF33B	7582	symbol	H. sapiens	7582	H. sapiens	ZNF33B	zinc finger protein 33B	GO:0045944 positive regulation of transcription by RNA polymerase II;GO:0045893 positive regulation of transcription, DNA-templated;GO:1903508 positive regulation of nucleic acid-templated transcription		Transcription factors:Zinc-coordinating DNA-binding domains; Predicted intracellular proteins	Endoplasmic reticulum;Nucleoli fibrillar center (Approved); Additional: Vesicles				0.0	0.0	0.0	0.0	0.0	0.0	0.0	0.0	0.0	0.0	0.0	0.0	0.0	0.0	0.0	0.0	0.0	0.0	0.0	0.0
CPSF7	79869	symbol	H. sapiens	79869	H. sapiens	CPSF7	cleavage and polyadenylation specific factor 7	GO:1990120 messenger ribonucleoprotein complex assembly;GO:0110104 mRNA alternative polyadenylation;GO:0098789 pre-mRNA cleavage required for polyadenylation		Predicted intracellular proteins	Nucleoplasm (Supported); Additional: Cytosol				1.0	0.0	0.0	0.0	1.0	0.0	0.0	0.0	0.0	0.0	0.0	0.0	0.0	0.0	0.0	0.0	0.0	0.0	0.0	0.0
RPRD2	23248	symbol	H. sapiens	23248	H. sapiens	RPRD2	regulation of nuclear pre-mRNA domain containing 2	GO:0031124 mRNA 3'-end processing;GO:0031123 RNA 3'-end processing;GO:0006397 mRNA processing		Predicted intracellular proteins	Nucleoplasm;Vesicles (Approved)				1.0	0.0	0.0	0.0	1.0	0.0	0.0	0.0	0.0	0.0	0.0	0.0	0.0	0.0	0.0	0.0	0.0	0.0	0.0	0.0
FLRT3	23767	symbol	H. sapiens	23767	H. sapiens	FLRT3	fibronectin leucine rich transmembrane protein 3	GO:0003345 proepicardium cell migration involved in pericardium morphogenesis;GO:0003344 pericardium morphogenesis;GO:0060973 cell migration involved in heart development		Disease related genes	Plasma membrane (Supported); Additional: Cell Junctions;Cytosol				0.0	0.0	0.0	0.0	0.0	0.0	0.0	0.0	0.0	0.0	0.0	0.0	0.0	0.0	0.0	0.0	0.0	0.0	1.0	0.0
TRDMT1	1787	symbol	H. sapiens	1787	H. sapiens	TRDMT1	tRNA aspartic acid methyltransferase 1	GO:0036415 regulation of tRNA stability;GO:0036416 tRNA stabilization;GO:1902370 regulation of tRNA catabolic process		Predicted intracellular proteins; Enzymes; ENZYME proteins:Transferases		Pentamidine; S-adenosyl-L-homocysteine; Glycerin			1.0	0.0	0.0	0.0	0.0	0.0	0.0	0.0	1.0	1.0	0.0	0.0	0.0	0.0	0.0	0.0	0.0	0.0	0.0	0.0
NCSTN	23385	symbol	H. sapiens	23385	H. sapiens	NCSTN	nicastrin	GO:1990926 short-term synaptic potentiation;GO:0042986 positive regulation of amyloid precursor protein biosynthetic process;GO:0007220 Notch receptor processing		Predicted intracellular proteins; Disease related genes	Cytosol (Approved)		(M251)PID SYNDECAN 3 PATHWAY; (M70)PID PS1 PATHWAY; (M17)PID NOTCH PATHWAY	(M5895)HALLMARK WNT BETA CATENIN SIGNALING	0.0	0.0	0.0	0.0	0.0	0.0	0.0	0.0	0.0	0.0	0.0	0.0	0.0	0.0	0.0	0.0	0.0	0.0	1.0	0.0
PRDM2	7799	symbol	H. sapiens	7799	H. sapiens	PRDM2	PR/SET domain 2	GO:0008340 determination of adult lifespan;GO:0010259 multicellular organism aging;GO:0016571 histone methylation		Transcription factors:Zinc-coordinating DNA-binding domains; Predicted intracellular proteins; Enzymes; ENZYME proteins:Transferases	Golgi apparatus;Nucleoplasm (Approved)			(M5942)HALLMARK UV RESPONSE DN	0.0	0.0	0.0	0.0	0.0	1.0	0.0	0.0	0.0	1.0	0.0	0.0	0.0	0.0	0.0	0.0	0.0	0.0	0.0	1.0
EZH1	2145	symbol	H. sapiens	2145	H. sapiens	EZH1	enhancer of zeste 1 polycomb repressive complex 2 subunit	GO:0070734 histone H3-K27 methylation;GO:0031507 heterochromatin assembly;GO:0070828 heterochromatin organization		Cancer-related genes:Mutated cancer genes; Predicted intracellular proteins; Enzymes; ENZYME proteins:Transferases	Nucleoplasm (Supported)	Tazemetostat		(M5945)HALLMARK HEME METABOLISM	0.0	0.0	0.0	0.0	0.0	1.0	0.0	0.0	0.0	1.0	0.0	0.0	0.0	0.0	0.0	0.0	0.0	0.0	0.0	0.0
ALPK1	80216	symbol	H. sapiens	80216	H. sapiens	ALPK1	alpha kinase 1	GO:0002753 cytoplasmic pattern recognition receptor signaling pathway;GO:0002221 pattern recognition receptor signaling pathway;GO:0043123 positive regulation of I-kappaB kinase/NF-kappaB signaling	Atypical: Alpha-type protein kinase family	Kinases:Atypical kinases; Predicted intracellular proteins; Enzymes	Centrosome (Approved)				0.0	0.0	1.0	0.0	0.0	0.0	0.0	0.0	0.0	0.0	0.0	0.0	0.0	0.0	0.0	0.0	0.0	0.0	0.0	0.0
DHX57	90957	symbol	H. sapiens	90957	H. sapiens	DHX57	DExH-box helicase 57			Predicted intracellular proteins; Enzymes; ENZYME proteins:Hydrolases	Intermediate filaments;Microtubules (Approved); Additional: Cytosol;Nucleoli				0.0	0.0	0.0	0.0	0.0	0.0	0.0	0.0	0.0	0.0	0.0	0.0	0.0	0.0	0.0	0.0	0.0	0.0	0.0	0.0
ENPP4	22875	symbol	H. sapiens	22875	H. sapiens	ENPP4	ectonucleotide pyrophosphatase/phosphodiesterase 4	GO:0046130 purine ribonucleoside catabolic process;GO:0006152 purine nucleoside catabolic process;GO:0046128 purine ribonucleoside metabolic process		Enzymes; ENZYME proteins:Hydrolases					0.0	0.0	0.0	0.0	0.0	0.0	0.0	0.0	1.0	0.0	0.0	0.0	0.0	0.0	0.0	0.0	0.0	0.0	0.0	0.0
NUP133	55746	symbol	H. sapiens	55746	H. sapiens	NUP133	nucleoporin 133	GO:0000972 transcription-dependent tethering of RNA polymerase II gene DNA at nuclear periphery;GO:0006999 nuclear pore organization;GO:0048339 paraxial mesoderm development		Predicted intracellular proteins; Transporters:Transporter channels and pores	Nuclear membrane (Supported)				1.0	0.0	0.0	1.0	0.0	0.0	1.0	0.0	0.0	0.0	0.0	0.0	1.0	0.0	0.0	0.0	0.0	0.0	0.0	1.0
CCDC88A	55704	symbol	H. sapiens	55704	H. sapiens	CCDC88A	coiled-coil domain containing 88A	GO:0072658 maintenance of protein location in membrane;GO:0072660 maintenance of protein location in plasma membrane;GO:1903566 positive regulation of protein localization to cilium		Predicted intracellular proteins; Disease related genes				(M5893)HALLMARK MITOTIC SPINDLE	0.0	0.0	1.0	0.0	0.0	0.0	1.0	1.0	0.0	0.0	0.0	1.0	0.0	0.0	1.0	0.0	0.0	0.0	0.0	0.0
NEK3	4752	symbol	H. sapiens	4752	H. sapiens	NEK3	NIMA related kinase 3	GO:0090043 regulation of tubulin deacetylation;GO:0090042 tubulin deacetylation;GO:0090311 regulation of protein deacetylation	NEK Ser/Thr protein kinase family	Predicted intracellular proteins; Kinases:NEK Ser/Thr protein kinases; Enzymes; ENZYME proteins:Transferases	Microtubules (Approved)	Fostamatinib			0.0	0.0	0.0	1.0	0.0	0.0	0.0	0.0	0.0	0.0	0.0	0.0	0.0	0.0	0.0	0.0	0.0	0.0	0.0	0.0
VRK3	51231	symbol	H. sapiens	51231	H. sapiens	VRK3	VRK serine/threonine kinase 3	GO:0032516 positive regulation of phosphoprotein phosphatase activity;GO:0010922 positive regulation of phosphatase activity;GO:0035307 positive regulation of protein dephosphorylation	CK1 Ser/Thr protein kinase family	Predicted intracellular proteins; Kinases:CK1 Ser/Thr protein kinases; Enzymes	Nucleoplasm;Vesicles (Supported)				0.0	0.0	0.0	0.0	0.0	0.0	0.0	0.0	0.0	0.0	0.0	0.0	0.0	0.0	0.0	0.0	0.0	0.0	1.0	1.0
LRCH1	23143	symbol	H. sapiens	23143	H. sapiens	LRCH1	leucine rich repeats and calponin homology domain containing 1	GO:2000405 negative regulation of T cell migration;GO:2000402 negative regulation of lymphocyte migration;GO:0071676 negative regulation of mononuclear cell migration		Predicted intracellular proteins	Actin filaments;Cytosol (Approved); Additional: Nucleoli				0.0	0.0	0.0	0.0	0.0	0.0	0.0	0.0	0.0	0.0	0.0	0.0	0.0	0.0	0.0	0.0	0.0	0.0	0.0	0.0
POLD3	10714	symbol	H. sapiens	10714	H. sapiens	POLD3	DNA polymerase delta 3, accessory subunit	GO:1904161 DNA synthesis involved in UV-damage excision repair;GO:0006297 nucleotide-excision repair, DNA gap filling;GO:0070914 UV-damage excision repair		Predicted intracellular proteins	Nucleoplasm (Supported)			(M5898)HALLMARK DNA REPAIR; (M5925)HALLMARK E2F TARGETS	0.0	1.0	0.0	1.0	0.0	0.0	0.0	0.0	0.0	0.0	0.0	0.0	0.0	1.0	0.0	0.0	0.0	0.0	0.0	0.0
PTPN9	5780	symbol	H. sapiens	5780	H. sapiens	PTPN9	protein tyrosine phosphatase non-receptor type 9	GO:1903078 positive regulation of protein localization to plasma membrane;GO:1904377 positive regulation of protein localization to cell periphery;GO:0035335 peptidyl-tyrosine dephosphorylation		Predicted intracellular proteins; Enzymes; ENZYME proteins:Hydrolases	Vesicles (Approved)				0.0	0.0	0.0	0.0	0.0	0.0	1.0	0.0	0.0	0.0	0.0	0.0	0.0	0.0	0.0	0.0	0.0	0.0	0.0	1.0
USP16	10600	symbol	H. sapiens	10600	H. sapiens	USP16	ubiquitin specific peptidase 16	GO:0070537 histone H2A K63-linked deubiquitination;GO:0045901 positive regulation of translational elongation;GO:0035521 monoubiquitinated histone deubiquitination		Disease related genes; Predicted intracellular proteins; Peptidases:Cysteine-type peptidases; Potential drug targets; ENZYME proteins:Hydrolases; Enzymes	Cytosol;Nucleoplasm (Approved)			(M5921)HALLMARK COMPLEMENT	0.0	1.0	0.0	1.0	0.0	1.0	0.0	0.0	1.0	0.0	1.0	0.0	0.0	0.0	0.0	0.0	0.0	1.0	0.0	0.0
ABLIM3	22885	symbol	H. sapiens	22885	H. sapiens	ABLIM3	actin binding LIM protein family member 3	GO:1903955 positive regulation of protein targeting to mitochondrion;GO:1903749 positive regulation of establishment of protein localization to mitochondrion;GO:1903214 regulation of protein targeting to mitochondrion		Predicted intracellular proteins	Nucleoplasm;Plasma membrane (Approved); Additional: Cell Junctions				0.0	0.0	1.0	0.0	0.0	0.0	1.0	0.0	0.0	0.0	0.0	0.0	0.0	0.0	0.0	0.0	0.0	0.0	0.0	0.0
C11orf57	55216	gene_synonym	H. sapiens	55216	H. sapiens	NKAPD1	NKAP domain containing 1			Predicted intracellular proteins	Cytosol (Approved)				0.0	0.0	0.0	0.0	0.0	0.0	0.0	0.0	0.0	0.0	0.0	0.0	0.0	0.0	0.0	0.0	0.0	0.0	0.0	0.0
RNF8	9025	symbol	H. sapiens	9025	H. sapiens	RNF8	ring finger protein 8	GO:0070535 histone H2A K63-linked ubiquitination;GO:0035093 spermatogenesis, exchange of chromosomal proteins;GO:0033523 histone H2B ubiquitination		Predicted intracellular proteins; Enzymes; ENZYME proteins:Transferases	Nucleoplasm (Supported); Additional: Cytosol		(M84)PID ATM PATHWAY		0.0	1.0	0.0	1.0	1.0	1.0	0.0	0.0	0.0	0.0	1.0	0.0	0.0	1.0	0.0	1.0	0.0	0.0	0.0	0.0
LINC01443	400644	symbol	H. sapiens	400644	H. sapiens	LINC01443	long intergenic non-protein coding RNA 1443								0.0	0.0	0.0	0.0	0.0	0.0	0.0	0.0	0.0	0.0	0.0	0.0	0.0	0.0	0.0	0.0	0.0	0.0	0.0	0.0
ASPA	443	symbol	H. sapiens	443	H. sapiens	ASPA	aspartoacylase	GO:0006533 aspartate catabolic process;GO:0006531 aspartate metabolic process;GO:0009068 aspartate family amino acid catabolic process		Disease related genes; Predicted intracellular proteins; Potential drug targets; ENZYME proteins:Hydrolases; Enzymes	Cytosol (Approved)	Aspartic acid; Zinc; Zinc acetate; Zinc chloride; Zinc sulfate, unspecified form			0.0	0.0	0.0	0.0	0.0	0.0	0.0	0.0	0.0	0.0	0.0	0.0	0.0	0.0	0.0	0.0	0.0	0.0	0.0	0.0
ZNF449	203523	symbol	H. sapiens	203523	H. sapiens	ZNF449	zinc finger protein 449	GO:0007284 spermatogonial cell division;GO:0022412 cellular process involved in reproduction in multicellular organism;GO:0007283 spermatogenesis		Transcription factors:Zinc-coordinating DNA-binding domains; Predicted intracellular proteins	Cytosol;Nucleoplasm (Approved)				0.0	0.0	0.0	1.0	0.0	0.0	0.0	0.0	0.0	0.0	0.0	0.0	0.0	0.0	0.0	1.0	0.0	0.0	0.0	0.0
STXBP6	29091	symbol	H. sapiens	29091	H. sapiens	STXBP6	syntaxin binding protein 6	GO:0035542 regulation of SNARE complex assembly;GO:0035493 SNARE complex assembly;GO:0045920 negative regulation of exocytosis		Predicted intracellular proteins					0.0	0.0	0.0	0.0	0.0	0.0	0.0	0.0	0.0	0.0	0.0	0.0	0.0	0.0	0.0	0.0	0.0	0.0	0.0	0.0
GNRH1	2796	symbol	H. sapiens	2796	H. sapiens	GNRH1	gonadotropin releasing hormone 1	GO:1990637 response to prolactin;GO:0033087 negative regulation of immature T cell proliferation;GO:2000354 regulation of ovarian follicle development		Disease related genes; Predicted secreted proteins			(M213)PID AR NONGENOMIC PATHWAY		0.0	0.0	0.0	0.0	0.0	0.0	0.0	0.0	0.0	0.0	0.0	0.0	0.0	0.0	0.0	0.0	0.0	0.0	0.0	1.0
STRN	6801	symbol	H. sapiens	6801	H. sapiens	STRN	striatin	GO:0070830 bicellular tight junction assembly;GO:0120192 tight junction assembly;GO:0043297 apical junction assembly		Predicted intracellular proteins; Cancer-related genes	Cytosol (Approved); Additional: Nucleoplasm		(M41)PID ER NONGENOMIC PATHWAY	(M5953)HALLMARK KRAS SIGNALING UP	0.0	0.0	0.0	0.0	0.0	0.0	0.0	0.0	0.0	0.0	0.0	0.0	0.0	0.0	0.0	0.0	0.0	0.0	0.0	0.0
MTMR11	10903	symbol	H. sapiens	10903	H. sapiens	MTMR11	myotubularin related protein 11	GO:0046856 phosphatidylinositol dephosphorylation;GO:0046839 phospholipid dephosphorylation;GO:0046488 phosphatidylinositol metabolic process		Predicted intracellular proteins	Centrosome (Approved)				0.0	0.0	0.0	0.0	0.0	0.0	0.0	0.0	0.0	0.0	0.0	0.0	0.0	0.0	0.0	0.0	0.0	0.0	0.0	0.0
LINC01119	100134259	symbol	H. sapiens	100134259	H. sapiens	LINC01119	long intergenic non-protein coding RNA 1119								0.0	0.0	0.0	0.0	0.0	0.0	0.0	0.0	0.0	0.0	0.0	0.0	0.0	0.0	0.0	0.0	0.0	0.0	0.0	0.0
UGP2	7360	symbol	H. sapiens	7360	H. sapiens	UGP2	UDP-glucose pyrophosphorylase 2	GO:0019255 glucose 1-phosphate metabolic process;GO:0006011 UDP-glucose metabolic process;GO:0009225 nucleotide-sugar metabolic process		Predicted intracellular proteins; Enzymes; ENZYME proteins:Transferases	Centrosome;Mitochondria (Approved); Additional: Nucleoplasm			(M5891)HALLMARK HYPOXIA; (M5937)HALLMARK GLYCOLYSIS	0.0	0.0	0.0	0.0	0.0	0.0	0.0	0.0	0.0	0.0	0.0	0.0	0.0	0.0	0.0	0.0	0.0	0.0	0.0	0.0
PEX11A	8800	symbol	H. sapiens	8800	H. sapiens	PEX11A	peroxisomal biogenesis factor 11 alpha	GO:0016557 peroxisome membrane biogenesis;GO:0044375 regulation of peroxisome size;GO:0016559 peroxisome fission		Predicted intracellular proteins; Transporters:Transporter channels and pores				(M5949)HALLMARK PEROXISOME; (M5948)HALLMARK BILE ACID METABOLISM; (M5906)HALLMARK ESTROGEN RESPONSE EARLY	0.0	0.0	0.0	0.0	0.0	0.0	0.0	0.0	0.0	0.0	0.0	0.0	0.0	0.0	0.0	0.0	1.0	1.0	0.0	0.0
SERPINB9P1	221756	symbol	H. sapiens	221756	H. sapiens	SERPINB9P1	serpin family B member 9 pseudogene 1								0.0	0.0	0.0	0.0	0.0	0.0	0.0	0.0	0.0	0.0	0.0	0.0	0.0	0.0	0.0	0.0	0.0	0.0	0.0	0.0
DDX46	9879	symbol	H. sapiens	9879	H. sapiens	DDX46	DEAD-box helicase 46	GO:0000377 RNA splicing, via transesterification reactions with bulged adenosine as nucleophile;GO:0000398 mRNA splicing, via spliceosome;GO:0000375 RNA splicing, via transesterification reactions		Predicted intracellular proteins; Enzymes; ENZYME proteins:Hydrolases	Nuclear speckles (Supported); Additional: Nucleoli fibrillar center				1.0	0.0	0.0	0.0	0.0	0.0	0.0	0.0	0.0	0.0	0.0	0.0	0.0	0.0	0.0	0.0	0.0	0.0	0.0	0.0
ACKR4	51554	symbol	H. sapiens	51554	H. sapiens	ACKR4	atypical chemokine receptor 4	GO:0070098 chemokine-mediated signaling pathway;GO:1990868 response to chemokine;GO:1990869 cellular response to chemokine		G-protein coupled receptors:Chemokines and chemotactic factors receptors; G-protein coupled receptors:GPCRs excl olfactory receptors	Mitochondria;Vesicles (Approved)				0.0	0.0	0.0	0.0	0.0	0.0	0.0	0.0	0.0	0.0	0.0	0.0	0.0	0.0	0.0	0.0	0.0	0.0	0.0	0.0
PSG1	5669	symbol	H. sapiens	5669	H. sapiens	PSG1	pregnancy specific beta-1-glycoprotein 1	GO:0007565 female pregnancy;GO:0044706 multi-multicellular organism process;GO:0044703 multi-organism reproductive process		CD markers; Predicted secreted proteins; Predicted intracellular proteins					0.0	0.0	0.0	0.0	0.0	0.0	0.0	0.0	0.0	0.0	0.0	0.0	0.0	0.0	0.0	0.0	0.0	0.0	0.0	0.0
CFAP44	55779	symbol	H. sapiens	55779	H. sapiens	CFAP44	cilia and flagella associated protein 44	GO:0007288 sperm axoneme assembly;GO:0120316 sperm flagellum assembly;GO:0044458 motile cilium assembly		Predicted intracellular proteins					0.0	0.0	1.0	0.0	0.0	0.0	0.0	0.0	0.0	0.0	0.0	1.0	0.0	0.0	0.0	1.0	0.0	0.0	0.0	0.0
ERMP1	79956	symbol	H. sapiens	79956	H. sapiens	ERMP1	endoplasmic reticulum metallopeptidase 1	GO:0030968 endoplasmic reticulum unfolded protein response;GO:0034620 cellular response to unfolded protein;GO:0035967 cellular response to topologically incorrect protein		Peptidases:Metallopeptidases; Enzymes					0.0	0.0	0.0	0.0	0.0	0.0	0.0	0.0	0.0	0.0	0.0	0.0	0.0	0.0	0.0	0.0	0.0	0.0	0.0	0.0
SNX1	6642	symbol	H. sapiens	6642	H. sapiens	SNX1	sorting nexin 1	GO:0034498 early endosome to Golgi transport;GO:0072673 lamellipodium morphogenesis;GO:0097581 lamellipodium organization		Predicted intracellular proteins	Endosomes;Lysosomes (Enhanced)		(M238)PID THROMBIN PAR1 PATHWAY; (M142)PID AJDISS 2PATHWAY		0.0	0.0	0.0	0.0	0.0	0.0	0.0	0.0	1.0	0.0	0.0	0.0	0.0	0.0	0.0	0.0	0.0	0.0	0.0	0.0
RBL2	5934	symbol	H. sapiens	5934	H. sapiens	RBL2	RB transcriptional corepressor like 2	GO:0043550 regulation of lipid kinase activity;GO:2000134 negative regulation of G1/S transition of mitotic cell cycle;GO:1902807 negative regulation of cell cycle G1/S phase transition		Predicted intracellular proteins; Cancer-related genes:Candidate cancer biomarkers	Mitotic chromosome;Nucleoli rim;Nucleoplasm (Supported); Additional: Cytosol		(M12771)SA PTEN PATHWAY; (M136)PID FOXO PATHWAY; (M40)PID E2F PATHWAY		0.0	0.0	0.0	1.0	0.0	0.0	0.0	0.0	0.0	0.0	0.0	0.0	0.0	1.0	0.0	0.0	0.0	0.0	0.0	1.0
LOC730102	730102	Gene_ID	H. sapiens	730102	H. sapiens	CRYZL2P	crystallin zeta like 2, pseudogene								0.0	0.0	0.0	0.0	0.0	0.0	0.0	0.0	0.0	0.0	0.0	0.0	0.0	0.0	0.0	0.0	0.0	0.0	0.0	0.0
GNS	2799	symbol	H. sapiens	2799	H. sapiens	GNS	glucosamine (N-acetyl)-6-sulfatase	GO:0042340 keratan sulfate catabolic process;GO:0042339 keratan sulfate metabolic process;GO:0006027 glycosaminoglycan catabolic process		Disease related genes; Predicted intracellular proteins; Potential drug targets; ENZYME proteins:Hydrolases; Enzymes					0.0	0.0	0.0	0.0	0.0	0.0	0.0	0.0	0.0	0.0	0.0	0.0	0.0	0.0	0.0	0.0	0.0	0.0	0.0	0.0
DNAJA4	55466	symbol	H. sapiens	55466	H. sapiens	DNAJA4	DnaJ heat shock protein family (Hsp40) member A4	GO:0090084 negative regulation of inclusion body assembly;GO:0090083 regulation of inclusion body assembly;GO:0042026 protein refolding		Predicted intracellular proteins	Cytosol;Plasma membrane (Approved)			(M5922)HALLMARK UNFOLDED PROTEIN RESPONSE	0.0	0.0	0.0	0.0	0.0	0.0	0.0	0.0	0.0	0.0	0.0	0.0	0.0	0.0	0.0	0.0	0.0	0.0	0.0	0.0
BRCC3	79184	symbol	H. sapiens	79184	H. sapiens	BRCC3	BRCA1/BRCA2-containing complex subunit 3	GO:0070537 histone H2A K63-linked deubiquitination;GO:0016578 histone deubiquitination;GO:0010165 response to X-ray		Disease related genes; Predicted intracellular proteins; Potential drug targets; Peptidases:Metallopeptidases; Enzymes	Nucleoplasm (Supported)	Zinc; Zinc acetate; Zinc chloride; Zinc sulfate, unspecified form			0.0	1.0	0.0	1.0	0.0	1.0	0.0	0.0	0.0	0.0	0.0	0.0	0.0	1.0	0.0	0.0	0.0	0.0	0.0	1.0
FBXO38	81545	symbol	H. sapiens	81545	H. sapiens	FBXO38	F-box protein 38	GO:0002842 positive regulation of T cell mediated immune response to tumor cell;GO:0002840 regulation of T cell mediated immune response to tumor cell;GO:0002424 T cell mediated immune response to tumor cell		Predicted intracellular proteins; Disease related genes	Nucleoplasm;Plasma membrane (Supported); Additional: Cytokinetic bridge;Cytosol				0.0	0.0	0.0	0.0	0.0	0.0	0.0	0.0	0.0	0.0	1.0	0.0	0.0	0.0	0.0	0.0	0.0	0.0	0.0	0.0
PEX11B	8799	symbol	H. sapiens	8799	H. sapiens	PEX11B	peroxisomal biogenesis factor 11 beta	GO:0044375 regulation of peroxisome size;GO:0016559 peroxisome fission;GO:0007031 peroxisome organization		Disease related genes	Vesicles (Supported); Additional: Nucleoplasm			(M5949)HALLMARK PEROXISOME	0.0	0.0	0.0	0.0	0.0	0.0	0.0	0.0	0.0	0.0	0.0	0.0	0.0	0.0	0.0	0.0	0.0	1.0	0.0	0.0
QTRTD1	79691	gene_synonym	H. sapiens	79691	H. sapiens	QTRT2	queuine tRNA-ribosyltransferase accessory subunit 2	GO:0101030 tRNA-guanine transglycosylation;GO:0006400 tRNA modification;GO:0008033 tRNA processing		Predicted intracellular proteins	Nucleoplasm (Approved); Additional: Intermediate filaments				1.0	0.0	0.0	0.0	0.0	0.0	0.0	0.0	0.0	0.0	0.0	0.0	0.0	0.0	0.0	0.0	0.0	0.0	0.0	0.0
ADPGK	83440	symbol	H. sapiens	83440	H. sapiens	ADPGK	ADP dependent glucokinase	GO:0061620 glycolytic process through glucose-6-phosphate;GO:0061615 glycolytic process through fructose-6-phosphate;GO:0006096 glycolytic process		Predicted intracellular proteins; Enzymes; ENZYME proteins:Transferases	Centrosome (Approved)				0.0	0.0	0.0	0.0	0.0	0.0	0.0	0.0	0.0	0.0	0.0	0.0	0.0	0.0	0.0	0.0	0.0	0.0	0.0	0.0
RECK	8434	symbol	H. sapiens	8434	H. sapiens	RECK	reversion inducing cysteine rich protein with kazal motifs	GO:0090210 regulation of establishment of blood-brain barrier;GO:0001955 blood vessel maturation;GO:0060856 establishment of blood-brain barrier			Plasma membrane (Supported)				0.0	0.0	0.0	0.0	0.0	0.0	0.0	0.0	0.0	0.0	0.0	0.0	0.0	0.0	0.0	0.0	0.0	0.0	0.0	0.0
SMARCA5	8467	symbol	H. sapiens	8467	H. sapiens	SMARCA5	SWI/SNF related, matrix associated, actin dependent regulator of chromatin, subfamily a, member 5	GO:0000183 rDNA heterochromatin assembly;GO:1990700 nucleolar chromatin organization;GO:0007000 nucleolus organization		Predicted intracellular proteins; Transcription factors:Helix-turn-helix domains	Nucleoplasm (Supported); Additional: Nucleoli fibrillar center	Beta-D-Glucose; 4-Deoxy-Alpha-D-Glucose			0.0	1.0	0.0	1.0	0.0	0.0	0.0	0.0	0.0	0.0	0.0	0.0	0.0	1.0	0.0	0.0	1.0	0.0	0.0	0.0
TFCP2	7024	symbol	H. sapiens	7024	H. sapiens	TFCP2	transcription factor CP2	GO:0042789 mRNA transcription by RNA polymerase II;GO:0009299 mRNA transcription;GO:0016071 mRNA metabolic process		Predicted intracellular proteins; Transcription factors:Immunoglobulin fold	Nucleoplasm (Supported); Additional: Cytosol		(M101)PID HDAC CLASSI PATHWAY		1.0	0.0	0.0	0.0	0.0	0.0	0.0	0.0	0.0	0.0	0.0	0.0	0.0	0.0	0.0	0.0	0.0	0.0	0.0	0.0
STEAP1	26872	symbol	H. sapiens	26872	H. sapiens	STEAP1	STEAP family member 1	GO:0055072 iron ion homeostasis;GO:0055076 transition metal ion homeostasis;GO:0055065 metal ion homeostasis		Transporters:Transport Electron Carriers; Cancer-related genes:Candidate cancer biomarkers					0.0	0.0	0.0	0.0	0.0	0.0	0.0	0.0	0.0	0.0	0.0	0.0	0.0	0.0	0.0	0.0	0.0	0.0	0.0	0.0
WDR53	348793	symbol	H. sapiens	348793	H. sapiens	WDR53	WD repeat domain 53			Predicted intracellular proteins	Cytosol;Plasma membrane (Approved)				0.0	0.0	0.0	0.0	0.0	0.0	0.0	0.0	0.0	0.0	0.0	0.0	0.0	0.0	0.0	0.0	0.0	0.0	0.0	0.0
C17orf80	55028	symbol	H. sapiens	55028	H. sapiens	C17orf80	chromosome 17 open reading frame 80	GO:0008150 biological_process		Predicted intracellular proteins	Nucleoplasm;Vesicles (Approved)				0.0	0.0	0.0	0.0	0.0	0.0	0.0	0.0	0.0	0.0	0.0	0.0	0.0	0.0	0.0	0.0	0.0	0.0	0.0	0.0
IL13RA1	3597	symbol	H. sapiens	3597	H. sapiens	IL13RA1	interleukin 13 receptor subunit alpha 1	GO:0038165 oncostatin-M-mediated signaling pathway;GO:0048861 leukemia inhibitory factor signaling pathway;GO:0019221 cytokine-mediated signaling pathway		CD markers; Predicted intracellular proteins	Vesicles (Approved); Additional: Nucleoplasm		(M28)PID IL4 2PATHWAY	(M5897)HALLMARK IL6 JAK STAT3 SIGNALING; (M5937)HALLMARK GLYCOLYSIS	0.0	0.0	0.0	0.0	0.0	0.0	0.0	0.0	0.0	0.0	0.0	0.0	0.0	0.0	0.0	0.0	0.0	0.0	0.0	1.0
ANAPC4	29945	symbol	H. sapiens	29945	H. sapiens	ANAPC4	anaphase promoting complex subunit 4	GO:0045842 positive regulation of mitotic metaphase/anaphase transition;GO:1901970 positive regulation of mitotic sister chromatid separation;GO:1902101 positive regulation of metaphase/anaphase transition of cell cycle		Predicted intracellular proteins	Intermediate filaments (Approved)				0.0	0.0	0.0	1.0	0.0	0.0	0.0	1.0	0.0	0.0	1.0	0.0	0.0	1.0	0.0	0.0	0.0	1.0	0.0	0.0
IPO11	51194	symbol	H. sapiens	51194	H. sapiens	IPO11	importin 11	GO:0006610 ribosomal protein import into nucleus;GO:0006606 protein import into nucleus;GO:0051170 import into nucleus		Predicted intracellular proteins; Transporters:Transporter channels and pores	Nucleoplasm (Supported); Additional: Cytosol				0.0	0.0	0.0	0.0	0.0	0.0	1.0	0.0	0.0	0.0	0.0	0.0	0.0	0.0	0.0	0.0	0.0	0.0	0.0	0.0
ZBTB33	10009	symbol	H. sapiens	10009	H. sapiens	ZBTB33	zinc finger and BTB domain containing 33	GO:0016055 Wnt signaling pathway;GO:0198738 cell-cell signaling by wnt;GO:1905114 cell surface receptor signaling pathway involved in cell-cell signaling		Transcription factors:Zinc-coordinating DNA-binding domains; Predicted intracellular proteins	Cytosol;Nucleoplasm;Plasma membrane (Enhanced)		(M142)PID AJDISS 2PATHWAY		0.0	0.0	0.0	0.0	0.0	0.0	0.0	0.0	0.0	0.0	0.0	0.0	0.0	0.0	0.0	0.0	0.0	0.0	0.0	0.0
SPIN1	10927	symbol	H. sapiens	10927	H. sapiens	SPIN1	spindlin 1	GO:0009303 rRNA transcription;GO:0098781 ncRNA transcription;GO:0030177 positive regulation of Wnt signaling pathway		Predicted intracellular proteins	Nucleoplasm (Supported)				0.0	0.0	0.0	0.0	0.0	0.0	0.0	0.0	0.0	0.0	0.0	0.0	0.0	0.0	0.0	1.0	0.0	0.0	0.0	0.0
TATDN2	9797	symbol	H. sapiens	9797	H. sapiens	TATDN2	TatD DNase domain containing 2	GO:0090305 nucleic acid phosphodiester bond hydrolysis;GO:0090304 nucleic acid metabolic process;GO:0006139 nucleobase-containing compound metabolic process		Predicted intracellular proteins	Nuclear speckles (Approved)			(M5922)HALLMARK UNFOLDED PROTEIN RESPONSE	0.0	0.0	0.0	0.0	0.0	0.0	0.0	0.0	0.0	0.0	0.0	0.0	0.0	0.0	0.0	0.0	0.0	0.0	0.0	0.0
CFAP126	257177	symbol	H. sapiens	257177	H. sapiens	CFAP126	cilia and flagella associated protein 126	GO:0044782 cilium organization;GO:0120036 plasma membrane bounded cell projection organization;GO:0030030 cell projection organization		Predicted intracellular proteins					0.0	0.0	1.0	0.0	0.0	0.0	0.0	0.0	0.0	0.0	0.0	0.0	0.0	0.0	0.0	0.0	0.0	0.0	0.0	0.0
C18orf65	400658	gene_synonym	H. sapiens	400658	H. sapiens	ZNF516-DT	ZNF516 divergent transcript								0.0	0.0	0.0	0.0	0.0	0.0	0.0	0.0	0.0	0.0	0.0	0.0	0.0	0.0	0.0	0.0	0.0	0.0	0.0	0.0
CBX3	11335	symbol	H. sapiens	11335	H. sapiens	CBX3	chromobox 3	GO:0006338 chromatin remodeling;GO:0048511 rhythmic process;GO:0006325 chromatin organization		Predicted intracellular proteins	Nucleoplasm (Supported); Additional: Nuclear bodies			(M5928)HALLMARK MYC TARGETS V2; (M5926)HALLMARK MYC TARGETS V1	0.0	1.0	0.0	0.0	0.0	0.0	0.0	0.0	0.0	0.0	0.0	0.0	0.0	0.0	0.0	0.0	0.0	0.0	0.0	0.0
NCK1	4690	symbol	H. sapiens	4690	H. sapiens	NCK1	NCK adaptor protein 1	GO:1903674 regulation of cap-dependent translational initiation;GO:1903676 positive regulation of cap-dependent translational initiation;GO:0002191 cap-dependent translational initiation		Predicted intracellular proteins	Cytosol;Plasma membrane (Enhanced)		(M226)PID VEGFR1 PATHWAY; (M193)PID NEPHRIN NEPH1 PATHWAY; (M108)PID NETRIN PATHWAY	(M5923)HALLMARK PI3K AKT MTOR SIGNALING; (M5893)HALLMARK MITOTIC SPINDLE; (M5950)HALLMARK ALLOGRAFT REJECTION	0.0	0.0	1.0	0.0	0.0	0.0	0.0	1.0	1.0	0.0	0.0	0.0	0.0	0.0	0.0	0.0	0.0	0.0	1.0	1.0
SLC25A43	203427	symbol	H. sapiens	203427	H. sapiens	SLC25A43	solute carrier family 25 member 43	GO:0055085 transmembrane transport;GO:0006810 transport;GO:0051234 establishment of localization		Transporters:Electrochemical Potential-driven transporters	Cytosol (Approved)				0.0	0.0	0.0	0.0	0.0	0.0	0.0	0.0	0.0	0.0	0.0	0.0	0.0	0.0	0.0	0.0	0.0	0.0	0.0	0.0
WDR31	114987	symbol	H. sapiens	114987	H. sapiens	WDR31	WD repeat domain 31			Predicted intracellular proteins	Cytosol (Approved); Additional: Nuclear bodies				0.0	0.0	0.0	0.0	0.0	0.0	0.0	0.0	0.0	0.0	0.0	0.0	0.0	0.0	0.0	0.0	0.0	0.0	0.0	0.0
ZNF618	114991	symbol	H. sapiens	114991	H. sapiens	ZNF618	zinc finger protein 618	GO:0035563 positive regulation of chromatin binding;GO:0035561 regulation of chromatin binding;GO:0051099 positive regulation of binding		Transcription factors:Zinc-coordinating DNA-binding domains; Predicted intracellular proteins	Nucleoplasm (Approved)				0.0	0.0	0.0	0.0	0.0	0.0	0.0	0.0	0.0	0.0	0.0	0.0	0.0	0.0	0.0	0.0	0.0	0.0	0.0	0.0
CA5B	11238	symbol	H. sapiens	11238	H. sapiens	CA5B	carbonic anhydrase 5B	GO:0006730 one-carbon metabolic process;GO:0009617 response to bacterium;GO:0051707 response to other organism		Predicted intracellular proteins; ENZYME proteins:Lyases; Enzymes	Mitochondria (Supported)	Zonisamide; Ellagic acid			0.0	0.0	0.0	0.0	0.0	0.0	0.0	0.0	0.0	0.0	0.0	0.0	0.0	0.0	0.0	0.0	0.0	0.0	0.0	0.0
FAN1	22909	symbol	H. sapiens	22909	H. sapiens	FAN1	FANCD2 and FANCI associated nuclease 1	GO:0033683 nucleotide-excision repair, DNA incision;GO:0036297 interstrand cross-link repair;GO:0006289 nucleotide-excision repair		Disease related genes; Predicted intracellular proteins; Potential drug targets; ENZYME proteins:Hydrolases; Enzymes	Nucleoplasm (Supported); Additional: Cytokinetic bridge;Cytosol		(M1)PID FANCONI PATHWAY		0.0	1.0	0.0	0.0	0.0	0.0	0.0	0.0	0.0	0.0	0.0	0.0	0.0	1.0	0.0	0.0	0.0	0.0	0.0	0.0
MTRF1	9617	symbol	H. sapiens	9617	H. sapiens	MTRF1	mitochondrial translation release factor 1	GO:0070126 mitochondrial translational termination;GO:0006449 regulation of translational termination;GO:0006415 translational termination		Predicted intracellular proteins				(M5936)HALLMARK OXIDATIVE PHOSPHORYLATION	0.0	0.0	0.0	0.0	0.0	0.0	0.0	0.0	1.0	0.0	0.0	0.0	0.0	0.0	0.0	0.0	0.0	0.0	0.0	0.0
MBIP	51562	symbol	H. sapiens	51562	H. sapiens	MBIP	MAP3K12 binding inhibitory protein 1	GO:0043966 histone H3 acetylation;GO:0046330 positive regulation of JNK cascade;GO:0032874 positive regulation of stress-activated MAPK cascade		Predicted intracellular proteins	Cytosol (Supported); Additional: Nucleoli;Nucleoplasm				0.0	0.0	0.0	0.0	0.0	1.0	0.0	0.0	0.0	0.0	0.0	0.0	0.0	0.0	0.0	0.0	0.0	0.0	0.0	0.0
ANKRD49	54851	symbol	H. sapiens	54851	H. sapiens	ANKRD49	ankyrin repeat domain 49	GO:0007283 spermatogenesis;GO:0048232 male gamete generation;GO:0007276 gamete generation		Predicted intracellular proteins	Nucleoli;Nucleoplasm (Approved); Additional: Golgi apparatus				0.0	0.0	0.0	0.0	0.0	0.0	0.0	0.0	0.0	0.0	0.0	0.0	0.0	0.0	0.0	1.0	0.0	0.0	0.0	0.0
INTS12	57117	symbol	H. sapiens	57117	H. sapiens	INTS12	integrator complex subunit 12	GO:0034472 snRNA 3'-end processing;GO:0016180 snRNA processing;GO:0016073 snRNA metabolic process		Cancer-related genes:Mutated cancer genes; Predicted intracellular proteins	Cytosol;Nucleoplasm (Approved); Additional: Nuclear bodies;Plasma membrane				0.0	0.0	0.0	0.0	1.0	0.0	0.0	0.0	0.0	0.0	0.0	0.0	0.0	0.0	0.0	0.0	0.0	0.0	0.0	0.0
NAE1	8883	symbol	H. sapiens	8883	H. sapiens	NAE1	NEDD8 activating enzyme E1 subunit 1	GO:0033314 mitotic DNA replication checkpoint signaling;GO:0000076 DNA replication checkpoint signaling;GO:0045116 protein neddylation		Predicted intracellular proteins	Nucleoplasm (Approved); Additional: Centrosome;Microtubules	ATP			0.0	0.0	0.0	0.0	0.0	0.0	0.0	0.0	0.0	0.0	0.0	0.0	0.0	0.0	0.0	0.0	0.0	0.0	0.0	0.0
BHLHB9	80823	symbol	H. sapiens	80823	H. sapiens	BHLHB9	basic helix-loop-helix family member b9	GO:0061003 positive regulation of dendritic spine morphogenesis;GO:0050775 positive regulation of dendrite morphogenesis;GO:0060999 positive regulation of dendritic spine development		Predicted intracellular proteins	Cytosol (Supported); Additional: Nucleoplasm				0.0	0.0	0.0	0.0	0.0	0.0	0.0	0.0	0.0	0.0	0.0	0.0	0.0	0.0	0.0	0.0	0.0	0.0	0.0	0.0
FAM45B	55855	gene_synonym	H. sapiens	55855	H. sapiens	DENND10P1	DENND10 pseudogene 1								0.0	0.0	0.0	0.0	0.0	0.0	0.0	0.0	0.0	0.0	0.0	0.0	0.0	0.0	0.0	0.0	0.0	0.0	0.0	0.0
ZNF621	285268	symbol	H. sapiens	285268	H. sapiens	ZNF621	zinc finger protein 621	GO:0006357 regulation of transcription by RNA polymerase II;GO:0006366 transcription by RNA polymerase II;GO:0006355 regulation of transcription, DNA-templated		Transcription factors:Zinc-coordinating DNA-binding domains; Predicted intracellular proteins	Nuclear speckles (Enhanced)				0.0	0.0	0.0	0.0	0.0	0.0	0.0	0.0	0.0	0.0	0.0	0.0	0.0	0.0	0.0	0.0	0.0	0.0	0.0	0.0
LGALS8	3964	symbol	H. sapiens	3964	H. sapiens	LGALS8	galectin 8	GO:1904977 lymphatic endothelial cell migration;GO:0098792 xenophagy;GO:0036303 lymph vessel morphogenesis		Predicted intracellular proteins	Plasma membrane (Approved)		(M5880)NABA ECM AFFILIATED; (M5885)NABA MATRISOME ASSOCIATED; (M5889)NABA MATRISOME		0.0	0.0	0.0	0.0	0.0	0.0	0.0	0.0	0.0	0.0	0.0	0.0	0.0	0.0	0.0	0.0	0.0	0.0	0.0	0.0
PARP2	10038	symbol	H. sapiens	10038	H. sapiens	PARP2	poly(ADP-ribose) polymerase 2	GO:0018312 peptidyl-serine ADP-ribosylation;GO:0030592 DNA ADP-ribosylation;GO:0070212 protein poly-ADP-ribosylation		FDA approved drug targets:Small molecule drugs; Predicted intracellular proteins; Enzymes; ENZYME proteins:Transferases	Nucleoplasm (Supported); Additional: Nucleoli	Veliparib; Olaparib; Talazoparib; Niraparib; Rucaparib	(M105)PID TELOMERASE PATHWAY	(M5951)HALLMARK SPERMATOGENESIS; (M5941)HALLMARK UV RESPONSE UP	0.0	1.0	0.0	0.0	0.0	1.0	0.0	0.0	0.0	0.0	0.0	0.0	0.0	1.0	0.0	0.0	0.0	0.0	0.0	0.0
SS18	6760	symbol	H. sapiens	6760	H. sapiens	SS18	SS18 subunit of BAF chromatin remodeling complex	GO:0097150 neuronal stem cell population maintenance;GO:0048013 ephrin receptor signaling pathway;GO:0019827 stem cell population maintenance		Predicted intracellular proteins; Disease related genes; Cancer-related genes	Nucleoplasm (Approved); Additional: Cytosol			(M5901)HALLMARK G2M CHECKPOINT	0.0	0.0	0.0	0.0	0.0	0.0	0.0	0.0	0.0	0.0	0.0	1.0	0.0	0.0	0.0	0.0	0.0	0.0	0.0	0.0
ZNF664	144348	symbol	H. sapiens	144348	H. sapiens	ZNF664	zinc finger protein 664	GO:0006357 regulation of transcription by RNA polymerase II;GO:0006366 transcription by RNA polymerase II;GO:0006355 regulation of transcription, DNA-templated		Transcription factors:Zinc-coordinating DNA-binding domains; Predicted intracellular proteins	Nucleoplasm (Approved)				0.0	0.0	0.0	0.0	0.0	0.0	0.0	0.0	0.0	0.0	0.0	0.0	0.0	0.0	0.0	0.0	0.0	0.0	0.0	0.0
CES1	1066	symbol	H. sapiens	1066	H. sapiens	CES1	carboxylesterase 1	GO:0090122 cholesterol ester hydrolysis involved in cholesterol transport;GO:0090119 vesicle-mediated cholesterol transport;GO:0120188 regulation of bile acid secretion		FDA approved drug targets:Small molecule drugs; Predicted intracellular proteins; Enzymes; ENZYME proteins:Hydrolases	Endoplasmic reticulum (Supported)	Tacrine; Meperidine; Levocarnitine; Dextropropoxyphene; Cocaine; Naloxone; Diamorphine; Probucol; Hydroxy-Phenyl-Acetic Acid 8-Methyl-8-Aza-Bicyclo[3.2.1]Oct-3-Yl Ester; Cholic Acid; 4-Piperidino-Piperidine; N-acetyl-alpha-neuraminic acid; Thenoyltrifluoroacetone; Cyclandelate; Avasimibe; (1R)-1,2,2-trimethylpropyl (R)-methylphosphinate; (1S,7S,8S,8AR)-1,2,3,7,8,8A-HEXAHYDRO-7-METHYL-8-[2-[(2R,4R…	(M13096)SA PROGRAMMED CELL DEATH; (M40)PID E2F PATHWAY	(M5934)HALLMARK XENOBIOTIC METABOLISM	0.0	0.0	0.0	0.0	0.0	0.0	0.0	0.0	0.0	0.0	0.0	0.0	0.0	0.0	0.0	0.0	0.0	0.0	0.0	0.0
CUL1	8454	symbol	H. sapiens	8454	H. sapiens	CUL1	cullin 1	GO:0031146 SCF-dependent proteasomal ubiquitin-dependent protein catabolic process;GO:0070936 protein K48-linked ubiquitination;GO:0006513 protein monoubiquitination		Cancer-related genes:Mutational cancer driver genes; Predicted intracellular proteins	Nucleoplasm (Supported); Additional: Nucleoli		(M31)PID BETA CATENIN DEG PATHWAY; (M17)PID NOTCH PATHWAY; (M223)PID BETA CATENIN NUC PATHWAY	(M5903)HALLMARK NOTCH SIGNALING; (M5895)HALLMARK WNT BETA CATENIN SIGNALING; (M5901)HALLMARK G2M CHECKPOINT	0.0	0.0	0.0	1.0	0.0	0.0	0.0	0.0	0.0	0.0	1.0	0.0	0.0	0.0	0.0	0.0	0.0	0.0	0.0	1.0
SLC9A8	23315	symbol	H. sapiens	23315	H. sapiens	SLC9A8	solute carrier family 9 member A8	GO:0051453 regulation of intracellular pH;GO:0030641 regulation of cellular pH;GO:0006885 regulation of pH		Transporters:Electrochemical Potential-driven transporters					0.0	0.0	0.0	0.0	0.0	0.0	0.0	0.0	0.0	0.0	0.0	0.0	0.0	0.0	0.0	0.0	0.0	0.0	0.0	0.0
ZNF585A	199704	symbol	H. sapiens	199704	H. sapiens	ZNF585A	zinc finger protein 585A	GO:0045944 positive regulation of transcription by RNA polymerase II;GO:0045893 positive regulation of transcription, DNA-templated;GO:1903508 positive regulation of nucleic acid-templated transcription		Transcription factors:Zinc-coordinating DNA-binding domains; Predicted intracellular proteins					0.0	0.0	0.0	0.0	0.0	0.0	0.0	0.0	0.0	0.0	0.0	0.0	0.0	0.0	0.0	0.0	0.0	0.0	0.0	0.0
DET1	55070	symbol	H. sapiens	55070	H. sapiens	DET1	DET1 partner of COP1 E3 ubiquitin ligase	GO:0032436 positive regulation of proteasomal ubiquitin-dependent protein catabolic process;GO:2000060 positive regulation of ubiquitin-dependent protein catabolic process;GO:1901800 positive regulation of proteasomal protein catabolic process		Predicted intracellular proteins	Microtubules;Nucleoplasm (Approved); Additional: Cytokinetic bridge;Cytosol				0.0	0.0	0.0	0.0	0.0	0.0	0.0	0.0	1.0	0.0	1.0	0.0	0.0	0.0	0.0	0.0	0.0	0.0	0.0	0.0
ZFP62	643836	symbol	H. sapiens	643836	H. sapiens	ZFP62	ZFP62 zinc finger protein	GO:0045944 positive regulation of transcription by RNA polymerase II;GO:0045893 positive regulation of transcription, DNA-templated;GO:1903508 positive regulation of nucleic acid-templated transcription		Transcription factors:Zinc-coordinating DNA-binding domains; Predicted intracellular proteins	Actin filaments;Nucleoplasm (Approved)				0.0	0.0	0.0	0.0	0.0	0.0	0.0	0.0	0.0	0.0	0.0	0.0	0.0	0.0	0.0	0.0	0.0	0.0	0.0	0.0
GANAB	23193	symbol	H. sapiens	23193	H. sapiens	GANAB	glucosidase II alpha subunit	GO:0006491 N-glycan processing;GO:0009100 glycoprotein metabolic process;GO:0005975 carbohydrate metabolic process		Disease related genes; Predicted intracellular proteins; ENZYME proteins:Hydrolases; FDA approved drug targets:Small molecule drugs; Enzymes	Endoplasmic reticulum (Approved)	Miglitol			0.0	0.0	0.0	0.0	0.0	0.0	0.0	0.0	0.0	0.0	0.0	0.0	0.0	0.0	0.0	0.0	0.0	0.0	0.0	0.0
RBM43	375287	symbol	H. sapiens	375287	H. sapiens	RBM43	RNA binding motif protein 43			Predicted intracellular proteins	Nucleoli (Approved); Additional: Nucleoplasm				0.0	0.0	0.0	0.0	0.0	0.0	0.0	0.0	0.0	0.0	0.0	0.0	0.0	0.0	0.0	0.0	0.0	0.0	0.0	0.0
RNF20	56254	symbol	H. sapiens	56254	H. sapiens	RNF20	ring finger protein 20	GO:2001168 positive regulation of histone H2B ubiquitination;GO:0033184 positive regulation of histone ubiquitination;GO:2001166 regulation of histone H2B ubiquitination		Predicted intracellular proteins; Enzymes; ENZYME proteins:Transferases	Nucleoplasm (Enhanced)				1.0	0.0	0.0	0.0	1.0	1.0	0.0	0.0	0.0	1.0	1.0	0.0	0.0	1.0	0.0	0.0	0.0	0.0	0.0	0.0
SYNGAP1	8831	symbol	H. sapiens	8831	H. sapiens	SYNGAP1	synaptic Ras GTPase activating protein 1	GO:0098880 maintenance of postsynaptic specialization structure;GO:0099558 maintenance of synapse structure;GO:0048169 regulation of long-term neuronal synaptic plasticity		Predicted intracellular proteins; Disease related genes; RAS pathway related proteins	Nucleoplasm (Approved)		(M269)PID RAS PATHWAY		0.0	0.0	0.0	0.0	0.0	0.0	0.0	0.0	0.0	0.0	0.0	0.0	0.0	0.0	0.0	0.0	0.0	0.0	0.0	0.0
PPP1R11	6992	symbol	H. sapiens	6992	H. sapiens	PPP1R11	protein phosphatase 1 regulatory inhibitor subunit 11	GO:0032515 negative regulation of phosphoprotein phosphatase activity;GO:0035308 negative regulation of protein dephosphorylation;GO:0010923 negative regulation of phosphatase activity		Predicted intracellular proteins; Enzymes; ENZYME proteins:Transferases	Vesicles (Approved)				0.0	0.0	0.0	0.0	0.0	0.0	0.0	0.0	0.0	0.0	1.0	0.0	0.0	0.0	0.0	0.0	0.0	0.0	0.0	0.0
KDM2A	22992	symbol	H. sapiens	22992	H. sapiens	KDM2A	lysine demethylase 2A	GO:0010944 negative regulation of transcription by competitive promoter binding;GO:0070544 histone H3-K36 demethylation;GO:0070076 histone lysine demethylation		ENZYME proteins:Oxidoreductases; Transcription factors:Zinc-coordinating DNA-binding domains; Predicted intracellular proteins; Enzymes	Nucleoplasm (Supported)				0.0	1.0	0.0	0.0	0.0	1.0	0.0	0.0	0.0	0.0	0.0	0.0	0.0	0.0	0.0	0.0	0.0	0.0	0.0	0.0
GSTM5	2949	symbol	H. sapiens	2949	H. sapiens	GSTM5	glutathione S-transferase mu 5	GO:0006749 glutathione metabolic process;GO:0006575 cellular modified amino acid metabolic process;GO:0006790 sulfur compound metabolic process		Predicted intracellular proteins; Enzymes; ENZYME proteins:Transferases	Cytosol (Uncertain); Additional: Cytokinetic bridge	Glutathione			0.0	0.0	0.0	0.0	0.0	0.0	0.0	0.0	0.0	0.0	0.0	0.0	0.0	0.0	0.0	0.0	0.0	0.0	0.0	0.0
LINC00933	100506874	symbol	H. sapiens	100506874	H. sapiens	LINC00933	long intergenic non-protein coding RNA 933								0.0	0.0	0.0	0.0	0.0	0.0	0.0	0.0	0.0	0.0	0.0	0.0	0.0	0.0	0.0	0.0	0.0	0.0	0.0	0.0
FAM69A	388650	gene_synonym	H. sapiens	388650	H. sapiens	DIPK1A	divergent protein kinase domain 1A			Predicted intracellular proteins	Cytosol (Approved); Additional: Nucleoplasm				0.0	0.0	0.0	0.0	0.0	0.0	0.0	0.0	0.0	0.0	0.0	0.0	0.0	0.0	0.0	0.0	0.0	0.0	0.0	0.0
RAP1A	5906	symbol	H. sapiens	5906	H. sapiens	RAP1A	RAP1A, member of RAS oncogene family	GO:2000301 negative regulation of synaptic vesicle exocytosis;GO:1905451 positive regulation of Fc-gamma receptor signaling pathway involved in phagocytosis;GO:0097327 response to antineoplastic agent		Predicted intracellular proteins; RAS pathway related proteins			(M69)PID REELIN PATHWAY; (M72)PID NECTIN PATHWAY; (M233)PID EPO PATHWAY		0.0	1.0	1.0	0.0	0.0	0.0	1.0	0.0	0.0	0.0	0.0	0.0	1.0	0.0	0.0	0.0	0.0	0.0	1.0	1.0
ZC2HC1A	51101	symbol	H. sapiens	51101	H. sapiens	ZC2HC1A	zinc finger C2HC-type containing 1A			Predicted intracellular proteins	Cytosol (Approved); Additional: Actin filaments				0.0	0.0	0.0	0.0	0.0	0.0	0.0	0.0	0.0	0.0	0.0	0.0	0.0	0.0	0.0	0.0	0.0	0.0	0.0	0.0
ZC4H2	55906	symbol	H. sapiens	55906	H. sapiens	ZC4H2	zinc finger C4H2-type containing	GO:0021522 spinal cord motor neuron differentiation;GO:0007528 neuromuscular junction development;GO:0021517 ventral spinal cord development		Predicted intracellular proteins; Disease related genes	Microtubules;Vesicles (Approved)				0.0	0.0	0.0	0.0	0.0	0.0	0.0	0.0	0.0	0.0	0.0	0.0	0.0	0.0	0.0	0.0	0.0	0.0	0.0	0.0
FAXDC2	10826	symbol	H. sapiens	10826	H. sapiens	FAXDC2	fatty acid hydroxylase domain containing 2	GO:0045654 positive regulation of megakaryocyte differentiation;GO:0045652 regulation of megakaryocyte differentiation;GO:0030219 megakaryocyte differentiation		Predicted intracellular proteins					0.0	0.0	0.0	0.0	0.0	0.0	0.0	0.0	0.0	0.0	0.0	0.0	0.0	0.0	0.0	0.0	0.0	0.0	0.0	0.0
CCDC66	285331	symbol	H. sapiens	285331	H. sapiens	CCDC66	coiled-coil domain containing 66	GO:1903564 regulation of protein localization to cilium;GO:0050908 detection of light stimulus involved in visual perception;GO:0050962 detection of light stimulus involved in sensory perception		Predicted intracellular proteins	Centriolar satellite (Supported); Additional: Cell Junctions;Cytosol;Midbody ring				0.0	0.0	1.0	0.0	0.0	0.0	1.0	0.0	0.0	0.0	0.0	1.0	0.0	0.0	0.0	0.0	0.0	0.0	0.0	0.0
SRGAP2	23380	symbol	H. sapiens	23380	H. sapiens	SRGAP2	SLIT-ROBO Rho GTPase activating protein 2	GO:0003363 lamellipodium assembly involved in ameboidal cell migration;GO:0021816 extension of a leading process involved in cell motility in cerebral cortex radial glia guided migration;GO:0021815 modulation of microtubule cytoskeleton involved in cerebral cortex radial glia guided migration		Predicted intracellular proteins; Disease related genes	Cytosol (Approved); Additional: Nucleoplasm				0.0	0.0	1.0	0.0	0.0	0.0	0.0	0.0	0.0	0.0	0.0	1.0	0.0	0.0	0.0	0.0	0.0	0.0	0.0	0.0
EFCAB7	84455	symbol	H. sapiens	84455	H. sapiens	EFCAB7	EF-hand calcium binding domain 7	GO:1903569 positive regulation of protein localization to ciliary membrane;GO:1903567 regulation of protein localization to ciliary membrane;GO:1903566 positive regulation of protein localization to cilium		Predicted intracellular proteins	Nucleoli;Nucleoli rim;Nucleoplasm (Approved); Additional: Cytosol;Plasma membrane				0.0	0.0	1.0	0.0	0.0	0.0	1.0	0.0	0.0	0.0	0.0	0.0	0.0	0.0	0.0	0.0	0.0	0.0	0.0	0.0
HNRNPDL	9987	symbol	H. sapiens	9987	H. sapiens	HNRNPDL	heterogeneous nuclear ribonucleoprotein D like	GO:0010468 regulation of gene expression;GO:0060255 regulation of macromolecule metabolic process;GO:0010467 gene expression		Predicted intracellular proteins; Disease related genes	Nucleoplasm (Enhanced)				0.0	0.0	0.0	0.0	0.0	0.0	0.0	0.0	0.0	0.0	0.0	0.0	0.0	0.0	0.0	0.0	0.0	0.0	0.0	1.0
NRAV	100506668	symbol	H. sapiens	100506668	H. sapiens	NRAV	negative regulator of antiviral response								0.0	0.0	0.0	0.0	0.0	0.0	0.0	0.0	0.0	0.0	0.0	0.0	0.0	0.0	0.0	0.0	0.0	0.0	0.0	0.0
SF3B1	23451	symbol	H. sapiens	23451	H. sapiens	SF3B1	splicing factor 3b subunit 1	GO:0000245 spliceosomal complex assembly;GO:0022618 ribonucleoprotein complex assembly;GO:0071826 ribonucleoprotein complex subunit organization		Cancer-related genes:Mutated cancer genes; Cancer-related genes:Mutational cancer driver genes; Predicted intracellular proteins	Nuclear speckles (Enhanced)	H3B-8800			1.0	0.0	0.0	0.0	0.0	0.0	0.0	0.0	0.0	0.0	0.0	0.0	0.0	0.0	0.0	0.0	0.0	0.0	0.0	0.0
LRRC34	151827	symbol	H. sapiens	151827	H. sapiens	LRRC34	leucine rich repeat containing 34	GO:0030154 cell differentiation;GO:0048869 cellular developmental process;GO:0032502 developmental process		Predicted intracellular proteins	Cell Junctions;Microtubules (Approved); Additional: Cytokinetic bridge;Mitotic spindle				0.0	0.0	0.0	0.0	0.0	0.0	0.0	0.0	0.0	0.0	0.0	0.0	0.0	0.0	0.0	0.0	0.0	0.0	0.0	0.0
FOXJ3	22887	symbol	H. sapiens	22887	H. sapiens	FOXJ3	forkhead box J3	GO:0007141 male meiosis I;GO:0007140 male meiotic nuclear division;GO:0007127 meiosis I		Predicted intracellular proteins; Transcription factors:Helix-turn-helix domains	Nuclear speckles;Nucleoplasm (Approved); Additional: Vesicles				0.0	0.0	0.0	0.0	0.0	0.0	0.0	0.0	0.0	0.0	0.0	0.0	0.0	0.0	0.0	1.0	0.0	1.0	0.0	0.0
WDR92	116143	gene_synonym	H. sapiens	116143	H. sapiens	DNAAF10	dynein axonemal assembly factor 10	GO:0070286 axonemal dynein complex assembly;GO:0035082 axoneme assembly;GO:0001578 microtubule bundle formation		Predicted intracellular proteins	Nucleoplasm (Approved)				0.0	0.0	1.0	0.0	0.0	0.0	0.0	0.0	0.0	0.0	0.0	1.0	0.0	0.0	0.0	0.0	0.0	0.0	0.0	0.0
FASTKD2	22868	symbol	H. sapiens	22868	H. sapiens	FASTKD2	FAST kinase domains 2	GO:1902775 mitochondrial large ribosomal subunit assembly;GO:0061668 mitochondrial ribosome assembly;GO:0044528 regulation of mitochondrial mRNA stability		Predicted intracellular proteins	Mitochondria (Supported)				1.0	0.0	0.0	0.0	1.0	0.0	0.0	0.0	1.0	0.0	0.0	0.0	0.0	0.0	1.0	0.0	0.0	0.0	0.0	0.0
FBLN7	129804	symbol	H. sapiens	129804	H. sapiens	FBLN7	fibulin 7	GO:0110151 positive regulation of biomineralization;GO:0110149 regulation of biomineralization;GO:0110148 biomineralization		Predicted intracellular proteins; Predicted secreted proteins	Plasma membrane (Approved); Additional: Cell Junctions		(M3008)NABA ECM GLYCOPROTEINS; (M5884)NABA CORE MATRISOME; (M5889)NABA MATRISOME		0.0	0.0	0.0	0.0	0.0	0.0	0.0	0.0	0.0	0.0	0.0	0.0	0.0	0.0	0.0	0.0	0.0	0.0	0.0	0.0
ZNF230	7773	symbol	H. sapiens	7773	H. sapiens	ZNF230	zinc finger protein 230	GO:0006357 regulation of transcription by RNA polymerase II;GO:0006366 transcription by RNA polymerase II;GO:0006355 regulation of transcription, DNA-templated		Transcription factors:Zinc-coordinating DNA-binding domains; Predicted intracellular proteins	Mitochondria (Approved)				0.0	0.0	0.0	0.0	0.0	0.0	0.0	0.0	0.0	0.0	0.0	0.0	0.0	0.0	0.0	0.0	0.0	0.0	0.0	0.0
SAMD9	54809	symbol	H. sapiens	54809	H. sapiens	SAMD9	sterile alpha motif domain containing 9	GO:0034058 endosomal vesicle fusion;GO:0006906 vesicle fusion;GO:0090174 organelle membrane fusion		Predicted intracellular proteins; Disease related genes	Cytosol (Supported); Additional: Vesicles			(M5911)HALLMARK INTERFERON ALPHA RESPONSE	0.0	0.0	0.0	0.0	0.0	0.0	0.0	0.0	0.0	0.0	0.0	0.0	0.0	0.0	0.0	0.0	0.0	0.0	0.0	0.0
MMP12	4321	symbol	H. sapiens	4321	H. sapiens	MMP12	matrix metallopeptidase 12	GO:1904905 negative regulation of endothelial cell-matrix adhesion via fibronectin;GO:0060309 elastin catabolic process;GO:0060435 bronchiole development		Peptidases:Metallopeptidases; ENZYME proteins:Hydrolases; Cancer-related genes:Candidate cancer biomarkers; FDA approved drug targets:Small molecule drugs; Predicted secreted proteins; Enzymes		Acetohydroxamic acid; Marimastat; CP-271485; PF-00356231; Batimastat; 2-[2-(1,3-Dioxo-1,3-Dihydro-2h-Isoindol-2-Yl)Ethyl]-4-(4'-Ethoxy-1,1'-Biphenyl-4-Yl)-4-Oxobutanoic Acid; AE-941; (1S,5S,7R)-N~7~-(BIPHENYL-4-YLMETHYL)-N~3~-HYDROXY-6,8-DIOXA-3-AZABICYCLO[3.2.1]OCTANE-3,7-DICARBOXAMIDE; N-(biphenyl-4-ylsulfonyl)-D-leucine; CGS-27023; N-(dibenzo[b,d]thiophen-3-ylsulfonyl)-L-valine; N-oxo-2-[(4-ph…	(M174)PID UPA UPAR PATHWAY; (M3468)NABA ECM REGULATORS; (M5885)NABA MATRISOME ASSOCIATED	(M5921)HALLMARK COMPLEMENT	0.0	0.0	0.0	0.0	0.0	0.0	1.0	0.0	0.0	0.0	0.0	0.0	0.0	0.0	0.0	0.0	0.0	0.0	0.0	1.0
EPB41L2	2037	symbol	H. sapiens	2037	H. sapiens	EPB41L2	erythrocyte membrane protein band 4.1 like 2	GO:1904778 positive regulation of protein localization to cell cortex;GO:1904776 regulation of protein localization to cell cortex;GO:0072697 protein localization to cell cortex		Predicted intracellular proteins	Plasma membrane (Enhanced); Additional: Cell Junctions;Nucleoplasm			(M5893)HALLMARK MITOTIC SPINDLE; (M5915)HALLMARK APICAL JUNCTION	0.0	0.0	0.0	1.0	0.0	0.0	1.0	0.0	0.0	0.0	0.0	0.0	0.0	0.0	0.0	0.0	0.0	0.0	0.0	0.0
CALCOCO2	10241	symbol	H. sapiens	10241	H. sapiens	CALCOCO2	calcium binding and coiled-coil domain 2	GO:1901098 positive regulation of autophagosome maturation;GO:0098792 xenophagy;GO:1901096 regulation of autophagosome maturation		Predicted intracellular proteins	Cytosol (Supported); Additional: Vesicles				0.0	0.0	0.0	0.0	0.0	0.0	0.0	1.0	1.0	0.0	0.0	0.0	0.0	0.0	0.0	0.0	0.0	0.0	0.0	0.0
ZNF846	162993	symbol	H. sapiens	162993	H. sapiens	ZNF846	zinc finger protein 846	GO:0000122 negative regulation of transcription by RNA polymerase II;GO:0045892 negative regulation of transcription, DNA-templated;GO:1903507 negative regulation of nucleic acid-templated transcription		Transcription factors:Zinc-coordinating DNA-binding domains; Predicted intracellular proteins	Actin filaments (Approved)				0.0	0.0	0.0	0.0	0.0	0.0	0.0	0.0	0.0	0.0	0.0	0.0	0.0	0.0	0.0	0.0	0.0	0.0	0.0	0.0
NOL8	55035	symbol	H. sapiens	55035	H. sapiens	NOL8	nucleolar protein 8	GO:1902570 protein localization to nucleolus;GO:0006364 rRNA processing;GO:0016072 rRNA metabolic process		Predicted intracellular proteins	Nucleoli (Supported); Additional: Mitotic chromosome			(M5939)HALLMARK P53 PATHWAY	0.0	0.0	0.0	0.0	0.0	0.0	1.0	0.0	0.0	0.0	0.0	0.0	0.0	0.0	0.0	0.0	0.0	0.0	0.0	0.0
DCLRE1A	9937	symbol	H. sapiens	9937	H. sapiens	DCLRE1A	DNA cross-link repair 1A	GO:0031848 protection from non-homologous end joining at telomere;GO:0043247 telomere maintenance in response to DNA damage;GO:0016233 telomere capping		Predicted intracellular proteins	Nucleoplasm (Supported); Additional: Nucleoli fibrillar center				0.0	1.0	0.0	1.0	0.0	0.0	0.0	0.0	0.0	0.0	0.0	0.0	0.0	1.0	0.0	0.0	0.0	0.0	0.0	0.0
SLC25A30	253512	symbol	H. sapiens	253512	H. sapiens	SLC25A30	solute carrier family 25 member 30	GO:0015709 thiosulfate transport;GO:0015743 malate transport;GO:0071423 malate transmembrane transport		Predicted intracellular proteins; Transporters:Electrochemical Potential-driven transporters	Nucleoplasm (Approved)				0.0	0.0	0.0	0.0	0.0	0.0	0.0	0.0	0.0	0.0	0.0	0.0	0.0	0.0	0.0	0.0	0.0	0.0	0.0	0.0
MTF1	4520	symbol	H. sapiens	4520	H. sapiens	MTF1	metal regulatory transcription factor 1	GO:1990079 cartilage homeostasis;GO:0071294 cellular response to zinc ion;GO:0010043 response to zinc ion		Transcription factors:Zinc-coordinating DNA-binding domains; Predicted intracellular proteins	Nucleoplasm (Supported)	Silver			0.0	0.0	0.0	0.0	0.0	0.0	0.0	0.0	0.0	0.0	0.0	0.0	0.0	0.0	0.0	0.0	1.0	0.0	0.0	0.0
RRAGD	58528	symbol	H. sapiens	58528	H. sapiens	RRAGD	Ras related GTP binding D	GO:0071233 cellular response to leucine;GO:1990253 cellular response to leucine starvation;GO:0043201 response to leucine		Predicted intracellular proteins	Nucleoplasm (Approved); Additional: Centrosome;Vesicles		(M121)PID MTOR 4PATHWAY	(M5947)HALLMARK IL2 STAT5 SIGNALING; (M5891)HALLMARK HYPOXIA; (M5937)HALLMARK GLYCOLYSIS	0.0	0.0	0.0	0.0	0.0	0.0	0.0	0.0	0.0	0.0	0.0	0.0	0.0	1.0	0.0	0.0	0.0	0.0	0.0	0.0
ARCN1	372	symbol	H. sapiens	372	H. sapiens	ARCN1	archain 1	GO:0021691 cerebellar Purkinje cell layer maturation;GO:0021590 cerebellum maturation;GO:0021699 cerebellar cortex maturation		Predicted intracellular proteins; Disease related genes	Vesicles (Supported); Additional: Cytosol;Golgi apparatus			(M5910)HALLMARK PROTEIN SECRETION	0.0	0.0	0.0	0.0	0.0	0.0	0.0	0.0	0.0	0.0	0.0	0.0	0.0	0.0	0.0	0.0	0.0	0.0	0.0	0.0
DUSP5P1	574029	symbol	H. sapiens	574029	H. sapiens	DUSP5P1	dual specificity phosphatase 5 pseudogene 1								0.0	0.0	0.0	0.0	0.0	0.0	0.0	0.0	0.0	0.0	0.0	0.0	0.0	0.0	0.0	0.0	0.0	0.0	0.0	0.0
SMNDC1	10285	symbol	H. sapiens	10285	H. sapiens	SMNDC1	survival motor neuron domain containing 1	GO:0000375 RNA splicing, via transesterification reactions;GO:0008380 RNA splicing;GO:0006397 mRNA processing		Predicted intracellular proteins	Nucleoplasm (Enhanced); Additional: Nuclear bodies				1.0	0.0	0.0	0.0	0.0	0.0	0.0	0.0	0.0	0.0	0.0	0.0	0.0	0.0	0.0	0.0	0.0	0.0	0.0	0.0
CYYR1	116159	symbol	H. sapiens	116159	H. sapiens	CYYR1	cysteine and tyrosine rich 1	GO:0008150 biological_process			Nucleoplasm (Approved)				0.0	0.0	0.0	0.0	0.0	0.0	0.0	0.0	0.0	0.0	0.0	0.0	0.0	0.0	0.0	0.0	0.0	0.0	0.0	0.0
KAT6B	23522	symbol	H. sapiens	23522	H. sapiens	KAT6B	lysine acetyltransferase 6B	GO:0043966 histone H3 acetylation;GO:0006334 nucleosome assembly;GO:0031497 chromatin assembly		Disease related genes; ENZYME proteins:Transferases; Transcription factors:Zinc-coordinating DNA-binding domains; Predicted intracellular proteins; Potential drug targets; Enzymes; Cancer-related genes	Nuclear bodies;Nucleoplasm (Approved)				0.0	0.0	0.0	0.0	0.0	1.0	0.0	0.0	0.0	0.0	0.0	0.0	0.0	1.0	0.0	0.0	0.0	0.0	0.0	0.0
ATP2B1	490	symbol	H. sapiens	490	H. sapiens	ATP2B1	ATPase plasma membrane Ca2+ transporting 1	GO:0071386 cellular response to corticosterone stimulus;GO:0071389 cellular response to mineralocorticoid stimulus;GO:0003056 regulation of vascular associated smooth muscle contraction		Enzymes; ENZYME proteins:Hydrolases	Plasma membrane (Supported)	Halothane	(M195)PID CMYB PATHWAY	(M5942)HALLMARK UV RESPONSE DN; (M5890)HALLMARK TNFA SIGNALING VIA NFKB; (M5932)HALLMARK INFLAMMATORY RESPONSE	0.0	0.0	0.0	0.0	0.0	0.0	0.0	0.0	0.0	0.0	0.0	0.0	0.0	0.0	0.0	0.0	0.0	0.0	0.0	1.0
FASTKD1	79675	symbol	H. sapiens	79675	H. sapiens	FASTKD1	FAST kinase domains 1	GO:0044528 regulation of mitochondrial mRNA stability;GO:0000963 mitochondrial RNA processing;GO:0000959 mitochondrial RNA metabolic process		Predicted intracellular proteins					1.0	0.0	0.0	0.0	1.0	0.0	0.0	0.0	1.0	0.0	0.0	0.0	0.0	0.0	0.0	0.0	0.0	0.0	0.0	0.0
HADHA	3030	symbol	H. sapiens	3030	H. sapiens	HADHA	hydroxyacyl-CoA dehydrogenase trifunctional multienzyme complex subunit alpha	GO:0035965 cardiolipin acyl-chain remodeling;GO:0032048 cardiolipin metabolic process;GO:0046471 phosphatidylglycerol metabolic process		Disease related genes; ENZYME proteins:Lyases; Predicted intracellular proteins; ENZYME proteins:Oxidoreductases; Potential drug targets; Enzymes	Mitochondria (Enhanced)	NADH		(M5936)HALLMARK OXIDATIVE PHOSPHORYLATION	0.0	0.0	0.0	0.0	0.0	0.0	0.0	0.0	0.0	0.0	0.0	0.0	0.0	0.0	0.0	0.0	0.0	0.0	0.0	0.0
TBX19	9095	symbol	H. sapiens	9095	H. sapiens	TBX19	T-box transcription factor 19	GO:0021983 pituitary gland development;GO:0001707 mesoderm formation;GO:0048332 mesoderm morphogenesis		Predicted intracellular proteins; Disease related genes; Transcription factors:Immunoglobulin fold	Nuclear speckles (Approved)				0.0	0.0	0.0	0.0	0.0	0.0	0.0	0.0	0.0	0.0	0.0	0.0	0.0	0.0	0.0	0.0	0.0	0.0	0.0	0.0
PER3	8863	symbol	H. sapiens	8863	H. sapiens	PER3	period circadian regulator 3	GO:0045187 regulation of circadian sleep/wake cycle, sleep;GO:0050802 circadian sleep/wake cycle, sleep;GO:0042749 regulation of circadian sleep/wake cycle		Predicted intracellular proteins; Disease related genes	Cytosol (Supported)				0.0	0.0	0.0	0.0	0.0	0.0	0.0	0.0	0.0	0.0	0.0	0.0	0.0	0.0	0.0	0.0	0.0	0.0	0.0	0.0
KPNA1	3836	symbol	H. sapiens	3836	H. sapiens	KPNA1	karyopherin subunit alpha 1	GO:0014901 satellite cell activation involved in skeletal muscle regeneration;GO:0014719 skeletal muscle satellite cell activation;GO:0099527 postsynapse to nucleus signaling pathway		Predicted intracellular proteins; Transporters:Transporter channels and pores	Nucleoplasm (Enhanced); Additional: Cytosol		(M249)PID PI3KCI AKT PATHWAY		0.0	1.0	0.0	0.0	0.0	0.0	1.0	0.0	0.0	0.0	0.0	0.0	0.0	1.0	0.0	0.0	0.0	0.0	0.0	1.0
ERCC8	1161	symbol	H. sapiens	1161	H. sapiens	ERCC8	ERCC excision repair 8, CSA ubiquitin ligase complex subunit	GO:0090262 regulation of transcription-coupled nucleotide-excision repair;GO:2000819 regulation of nucleotide-excision repair;GO:0097680 double-strand break repair via classical nonhomologous end joining		Predicted intracellular proteins; Disease related genes	Nuclear speckles (Approved)			(M5898)HALLMARK DNA REPAIR	0.0	1.0	0.0	0.0	0.0	0.0	0.0	0.0	0.0	0.0	1.0	0.0	0.0	1.0	0.0	0.0	0.0	0.0	0.0	0.0
ZNF225	7768	symbol	H. sapiens	7768	H. sapiens	ZNF225	zinc finger protein 225	GO:0045944 positive regulation of transcription by RNA polymerase II;GO:0045893 positive regulation of transcription, DNA-templated;GO:1903508 positive regulation of nucleic acid-templated transcription		Transcription factors:Zinc-coordinating DNA-binding domains; Predicted intracellular proteins	Nucleoplasm (Approved)				0.0	0.0	0.0	0.0	0.0	0.0	0.0	0.0	0.0	0.0	0.0	0.0	0.0	0.0	0.0	0.0	0.0	0.0	0.0	0.0
FIGN	55137	symbol	H. sapiens	55137	H. sapiens	FIGN	fidgetin, microtubule severing factor	GO:0051013 microtubule severing;GO:0051301 cell division;GO:0000226 microtubule cytoskeleton organization		Predicted intracellular proteins	Cytosol;Nucleoplasm;Plasma membrane (Approved); Additional: Cell Junctions;Vesicles				0.0	0.0	0.0	1.0	0.0	0.0	0.0	0.0	0.0	0.0	0.0	1.0	0.0	0.0	0.0	0.0	0.0	0.0	0.0	0.0
RNF157	114804	symbol	H. sapiens	114804	H. sapiens	RNF157	ring finger protein 157	GO:0043951 negative regulation of cAMP-mediated signaling;GO:1903861 positive regulation of dendrite extension;GO:1903859 regulation of dendrite extension		Predicted intracellular proteins; Enzymes; ENZYME proteins:Transferases	Golgi apparatus (Approved); Additional: Vesicles				0.0	0.0	0.0	0.0	0.0	0.0	0.0	0.0	0.0	0.0	0.0	0.0	0.0	0.0	0.0	0.0	0.0	0.0	0.0	0.0
ITGA4	3676	symbol	H. sapiens	3676	H. sapiens	ITGA4	integrin subunit alpha 4	GO:0043496 regulation of protein homodimerization activity;GO:0090074 negative regulation of protein homodimerization activity;GO:1990771 clathrin-dependent extracellular exosome endocytosis		CD markers; Predicted intracellular proteins; FDA approved drug targets:Biotech drugs; Cancer-related genes:Candidate cancer biomarkers	Plasma membrane (Approved)	Natalizumab; ATL1102; CDP323; R1295; R411; Tinzaparin; Vedolizumab	(M212)PID INTEGRIN5 PATHWAY; (M274)PID LYMPH ANGIOGENESIS PATHWAY; (M47)PID INTEGRIN CS PATHWAY	(M5897)HALLMARK IL6 JAK STAT3 SIGNALING	0.0	0.0	0.0	0.0	0.0	0.0	0.0	0.0	0.0	0.0	0.0	0.0	0.0	0.0	0.0	0.0	0.0	0.0	0.0	0.0
SUPV3L1	6832	symbol	H. sapiens	6832	H. sapiens	SUPV3L1	Suv3 like RNA helicase	GO:0035945 mitochondrial ncRNA surveillance;GO:0071026 cytoplasmic RNA surveillance;GO:2000827 mitochondrial RNA surveillance		Predicted intracellular proteins; Enzymes; ENZYME proteins:Hydrolases	Mitochondria (Supported)			(M5928)HALLMARK MYC TARGETS V2; (M5936)HALLMARK OXIDATIVE PHOSPHORYLATION	1.0	1.0	0.0	0.0	1.0	0.0	0.0	0.0	1.0	0.0	0.0	0.0	0.0	1.0	0.0	0.0	0.0	0.0	0.0	0.0
ZNF266	10781	symbol	H. sapiens	10781	H. sapiens	ZNF266	zinc finger protein 266	GO:0000122 negative regulation of transcription by RNA polymerase II;GO:0045892 negative regulation of transcription, DNA-templated;GO:1903507 negative regulation of nucleic acid-templated transcription		Transcription factors:Zinc-coordinating DNA-binding domains; Predicted intracellular proteins	Vesicles (Supported); Additional: Nucleoplasm;Rods & Rings				0.0	0.0	0.0	0.0	0.0	0.0	0.0	0.0	0.0	0.0	0.0	0.0	0.0	0.0	0.0	0.0	0.0	0.0	0.0	0.0
MTRR	4552	symbol	H. sapiens	4552	H. sapiens	MTRR	5-methyltetrahydrofolate-homocysteine methyltransferase reductase	GO:1904041 regulation of cystathionine beta-synthase activity;GO:1904042 negative regulation of cystathionine beta-synthase activity;GO:0043418 homocysteine catabolic process		Disease related genes; Predicted intracellular proteins; ENZYME proteins:Oxidoreductases; Potential drug targets; Enzymes	Cytosol;Nucleoplasm (Approved); Additional: Intermediate filaments	Cyanocobalamin; Methionine		(M5936)HALLMARK OXIDATIVE PHOSPHORYLATION	0.0	0.0	0.0	0.0	0.0	0.0	0.0	0.0	0.0	1.0	0.0	0.0	0.0	0.0	0.0	0.0	0.0	0.0	0.0	0.0
LINC00847	729678	symbol	H. sapiens	729678	H. sapiens	LINC00847	long intergenic non-protein coding RNA 847								0.0	0.0	0.0	0.0	0.0	0.0	0.0	0.0	0.0	0.0	0.0	0.0	0.0	0.0	0.0	0.0	0.0	0.0	0.0	0.0
RCAN2	10231	symbol	H. sapiens	10231	H. sapiens	RCAN2	regulator of calcineurin 2	GO:0019722 calcium-mediated signaling;GO:0019932 second-messenger-mediated signaling;GO:0050790 regulation of catalytic activity		Predicted intracellular proteins	Mitochondria (Approved); Additional: Nucleoplasm		(M235)PID TCR CALCIUM PATHWAY; (M113)PID NFAT 3PATHWAY		0.0	0.0	0.0	0.0	0.0	0.0	0.0	0.0	0.0	0.0	0.0	0.0	0.0	0.0	0.0	0.0	0.0	0.0	0.0	0.0
PSG9	5678	symbol	H. sapiens	5678	H. sapiens	PSG9	pregnancy specific beta-1-glycoprotein 9	GO:0007565 female pregnancy;GO:0044706 multi-multicellular organism process;GO:0044703 multi-organism reproductive process		Predicted secreted proteins					0.0	0.0	0.0	0.0	0.0	0.0	0.0	0.0	0.0	0.0	0.0	0.0	0.0	0.0	0.0	0.0	0.0	0.0	0.0	0.0
KIAA1328	57536	symbol	H. sapiens	57536	H. sapiens	KIAA1328	KIAA1328			Predicted intracellular proteins	Nuclear speckles (Approved); Additional: Lipid droplets;Vesicles				0.0	0.0	0.0	0.0	0.0	0.0	0.0	0.0	0.0	0.0	0.0	0.0	0.0	0.0	0.0	0.0	0.0	0.0	0.0	0.0
APOD	347	symbol	H. sapiens	347	H. sapiens	APOD	apolipoprotein D	GO:0034443 negative regulation of lipoprotein oxidation;GO:0060588 negative regulation of lipoprotein lipid oxidation;GO:0034439 lipoprotein lipid oxidation		Candidate cardiovascular disease genes; Predicted secreted proteins; Cancer-related genes:Candidate cancer biomarkers	Plasma membrane (Approved)	Vitamin A; Copper		(M5909)HALLMARK MYOGENESIS; (M5953)HALLMARK KRAS SIGNALING UP	0.0	0.0	0.0	0.0	0.0	0.0	1.0	0.0	0.0	0.0	0.0	0.0	0.0	0.0	0.0	0.0	0.0	0.0	0.0	1.0
EIF4G3	8672	symbol	H. sapiens	8672	H. sapiens	EIF4G3	eukaryotic translation initiation factor 4 gamma 3	GO:0006446 regulation of translational initiation;GO:0010507 negative regulation of autophagy;GO:0006413 translational initiation		Predicted intracellular proteins	Cytosol (Approved)			(M5950)HALLMARK ALLOGRAFT REJECTION	0.0	0.0	0.0	0.0	0.0	0.0	0.0	0.0	1.0	0.0	0.0	0.0	1.0	0.0	0.0	0.0	0.0	0.0	0.0	1.0
NSF	4905	symbol	H. sapiens	4905	H. sapiens	NSF	N-ethylmaleimide sensitive factor, vesicle fusing ATPase	GO:0048211 Golgi vesicle docking;GO:0035494 SNARE complex disassembly;GO:0001921 positive regulation of receptor recycling		Predicted intracellular proteins; Transporters:Transporter channels and pores; Enzymes; ENZYME proteins:Hydrolases	Cytosol (Supported); Additional: Golgi apparatus	1-Ethyl-Pyrrolidine-2,5-Dione			0.0	0.0	0.0	0.0	0.0	0.0	0.0	0.0	1.0	0.0	0.0	0.0	0.0	0.0	0.0	0.0	0.0	0.0	0.0	0.0
ASH2L	9070	symbol	H. sapiens	9070	H. sapiens	ASH2L	ASH2 like, histone lysine methyltransferase complex subunit	GO:0051568 histone H3-K4 methylation;GO:0043627 response to estrogen;GO:0034968 histone lysine methylation		Predicted intracellular proteins	Nucleoplasm (Supported); Additional: Plasma membrane				0.0	1.0	0.0	0.0	0.0	1.0	0.0	0.0	0.0	1.0	0.0	0.0	0.0	0.0	0.0	0.0	0.0	0.0	0.0	0.0
CAMK2A	815	symbol	H. sapiens	815	H. sapiens	CAMK2A	calcium/calmodulin dependent protein kinase II alpha	GO:1990443 peptidyl-threonine autophosphorylation;GO:2000124 regulation of endocannabinoid signaling pathway;GO:0071926 endocannabinoid signaling pathway	CAMK Ser/Thr protein kinase family	Kinases:CAMK Ser/Thr protein kinases; Predicted intracellular proteins; Enzymes; ENZYME proteins:Transferases	Plasma membrane (Approved); Additional: Cell Junctions;Cytosol	Hexatantalum Dodecabromide; 1,4-Dithiothreitol; (2Z,3E)-2,3'-biindole-2',3(1H,1'H)-dione 3-{O-[(3R)-3,4-dihydroxybutyl]oxime}; Fostamatinib	(M23)PID WNT NONCANONICAL PATHWAY; (M108)PID NETRIN PATHWAY; (M271)PID PI3K PLC TRK PATHWAY		0.0	0.0	0.0	0.0	0.0	0.0	0.0	0.0	0.0	0.0	0.0	0.0	0.0	0.0	0.0	0.0	0.0	0.0	1.0	1.0
GLMN	11146	symbol	H. sapiens	11146	H. sapiens	GLMN	glomulin, FKBP associated protein	GO:0032743 positive regulation of interleukin-2 production;GO:0032623 interleukin-2 production;GO:0032663 regulation of interleukin-2 production		Predicted intracellular proteins; Disease related genes	Cytosol;Nucleoplasm (Approved)			(M5950)HALLMARK ALLOGRAFT REJECTION	0.0	0.0	0.0	0.0	0.0	0.0	0.0	0.0	0.0	0.0	1.0	0.0	0.0	0.0	0.0	0.0	0.0	0.0	0.0	0.0
ERLIN2	11160	symbol	H. sapiens	11160	H. sapiens	ERLIN2	ER lipid raft associated 2	GO:0045541 negative regulation of cholesterol biosynthetic process;GO:0090206 negative regulation of cholesterol metabolic process;GO:0106119 negative regulation of sterol biosynthetic process		Potential drug targets; Disease related genes; Transporters:Transporter channels and pores; Predicted intracellular proteins	Endoplasmic reticulum (Supported)				0.0	0.0	0.0	0.0	0.0	0.0	0.0	0.0	0.0	0.0	1.0	0.0	0.0	0.0	0.0	0.0	0.0	0.0	0.0	0.0
CCDC82	79780	symbol	H. sapiens	79780	H. sapiens	CCDC82	coiled-coil domain containing 82			Predicted intracellular proteins	Nucleoplasm (Approved); Additional: Cytosol;Nuclear bodies				0.0	0.0	0.0	0.0	0.0	0.0	0.0	0.0	0.0	0.0	0.0	0.0	0.0	0.0	0.0	0.0	0.0	0.0	0.0	0.0
AQP9	366	symbol	H. sapiens	366	H. sapiens	AQP9	aquaporin 9	GO:0015722 canalicular bile acid transport;GO:1904823 purine nucleobase transmembrane transport;GO:0015855 pyrimidine nucleobase transport		Transporters:Transporter channels and pores				(M5948)HALLMARK BILE ACID METABOLISM; (M5932)HALLMARK INFLAMMATORY RESPONSE; (M5934)HALLMARK XENOBIOTIC METABOLISM	0.0	0.0	0.0	0.0	0.0	0.0	0.0	0.0	0.0	0.0	0.0	0.0	0.0	0.0	0.0	0.0	0.0	0.0	0.0	0.0
UBXN4	23190	symbol	H. sapiens	23190	H. sapiens	UBXN4	UBX domain protein 4	GO:0030433 ubiquitin-dependent ERAD pathway;GO:0036503 ERAD pathway;GO:0006986 response to unfolded protein		Predicted intracellular proteins	Endoplasmic reticulum (Supported)				0.0	0.0	0.0	0.0	0.0	0.0	0.0	0.0	0.0	0.0	1.0	0.0	0.0	0.0	0.0	0.0	0.0	0.0	0.0	0.0
ZNF383	163087	symbol	H. sapiens	163087	H. sapiens	ZNF383	zinc finger protein 383	GO:0006357 regulation of transcription by RNA polymerase II;GO:0006366 transcription by RNA polymerase II;GO:0006355 regulation of transcription, DNA-templated		Transcription factors:Zinc-coordinating DNA-binding domains; Predicted intracellular proteins	Nuclear membrane;Nucleoplasm (Supported)				0.0	0.0	0.0	0.0	0.0	0.0	0.0	0.0	0.0	0.0	0.0	0.0	0.0	0.0	0.0	0.0	0.0	0.0	0.0	0.0
ZNF670	93474	symbol	H. sapiens	93474	H. sapiens	ZNF670	zinc finger protein 670	GO:0006357 regulation of transcription by RNA polymerase II;GO:0006366 transcription by RNA polymerase II;GO:0006355 regulation of transcription, DNA-templated		Transcription factors:Zinc-coordinating DNA-binding domains; Predicted intracellular proteins	Nucleoplasm (Approved); Additional: Cytosol				0.0	0.0	0.0	0.0	0.0	0.0	0.0	0.0	0.0	0.0	0.0	0.0	0.0	0.0	0.0	0.0	0.0	0.0	0.0	0.0
CNOT4	4850	symbol	H. sapiens	4850	H. sapiens	CNOT4	CCR4-NOT transcription complex subunit 4	GO:0045652 regulation of megakaryocyte differentiation;GO:0030219 megakaryocyte differentiation;GO:0051865 protein autoubiquitination		Transcription factors:Zinc-coordinating DNA-binding domains; Predicted intracellular proteins; Enzymes; ENZYME proteins:Transferases				(M5922)HALLMARK UNFOLDED PROTEIN RESPONSE	1.0	0.0	0.0	0.0	0.0	0.0	0.0	0.0	1.0	0.0	1.0	0.0	0.0	1.0	0.0	0.0	0.0	0.0	0.0	0.0
ORC3	23595	symbol	H. sapiens	23595	H. sapiens	ORC3	origin recognition complex subunit 3	GO:0006270 DNA replication initiation;GO:0006275 regulation of DNA replication;GO:0061351 neural precursor cell proliferation		Predicted intracellular proteins	Nucleoplasm (Supported)				0.0	0.0	0.0	1.0	0.0	0.0	0.0	0.0	0.0	0.0	0.0	0.0	0.0	1.0	0.0	0.0	0.0	0.0	0.0	0.0
STK32A	202374	symbol	H. sapiens	202374	H. sapiens	STK32A	serine/threonine kinase 32A	GO:0018105 peptidyl-serine phosphorylation;GO:0018209 peptidyl-serine modification;GO:0018193 peptidyl-amino acid modification	Other	Predicted intracellular proteins; Enzymes; Kinases; ENZYME proteins:Transferases	Centrosome (Approved)	Fostamatinib			0.0	0.0	0.0	0.0	0.0	0.0	0.0	0.0	0.0	0.0	0.0	0.0	0.0	0.0	0.0	0.0	0.0	0.0	0.0	0.0
PTPRA	5786	symbol	H. sapiens	5786	H. sapiens	PTPRA	protein tyrosine phosphatase receptor type A	GO:0051893 regulation of focal adhesion assembly;GO:0090109 regulation of cell-substrate junction assembly;GO:0150116 regulation of cell-substrate junction organization		Predicted intracellular proteins; Enzymes; ENZYME proteins:Hydrolases	Vesicles (Approved); Additional: Nucleoplasm		(M277)PID INTEGRIN A4B1 PATHWAY; (M16)PID INSULIN PATHWAY		0.0	0.0	0.0	0.0	0.0	0.0	0.0	0.0	0.0	0.0	0.0	0.0	0.0	0.0	0.0	0.0	0.0	0.0	0.0	0.0
AP3B1	8546	symbol	H. sapiens	8546	H. sapiens	AP3B1	adaptor related protein complex 3 subunit beta 1	GO:0090152 establishment of protein localization to mitochondrial membrane involved in mitochondrial fission;GO:0016182 synaptic vesicle budding from endosome;GO:0051138 positive regulation of NK T cell differentiation		Predicted intracellular proteins; Disease related genes	Nucleoplasm (Approved); Additional: Golgi apparatus			(M5910)HALLMARK PROTEIN SECRETION	1.0	0.0	0.0	0.0	0.0	0.0	1.0	0.0	0.0	0.0	0.0	0.0	0.0	0.0	0.0	1.0	0.0	1.0	0.0	0.0
YY1AP1	55249	symbol	H. sapiens	55249	H. sapiens	YY1AP1	YY1 associated protein 1	GO:0051726 regulation of cell cycle;GO:0007049 cell cycle;GO:0008283 cell population proliferation		Predicted intracellular proteins; Disease related genes	Nucleoli fibrillar center (Approved)				0.0	0.0	0.0	0.0	0.0	0.0	0.0	0.0	0.0	0.0	0.0	0.0	0.0	0.0	0.0	0.0	0.0	0.0	0.0	0.0
CASK	8573	symbol	H. sapiens	8573	H. sapiens	CASK	calcium/calmodulin dependent serine protein kinase	GO:0046710 GDP metabolic process;GO:0010839 negative regulation of keratinocyte proliferation;GO:0046037 GMP metabolic process	CAMK Ser/Thr protein kinase family	Disease related genes; ENZYME proteins:Transferases; Predicted intracellular proteins; Potential drug targets; Kinases:CAMK Ser/Thr protein kinases; Enzymes	Nucleoplasm (Approved); Additional: Cytosol	Formic acid; Fostamatinib	(M251)PID SYNDECAN 3 PATHWAY; (M240)PID SYNDECAN 2 PATHWAY; (M198)PID SYNDECAN 1 PATHWAY		0.0	0.0	0.0	0.0	0.0	0.0	0.0	0.0	0.0	0.0	0.0	0.0	0.0	0.0	0.0	0.0	0.0	0.0	0.0	0.0
POC1B	282809	symbol	H. sapiens	282809	H. sapiens	POC1B	POC1 centriolar protein B	GO:0007099 centriole replication;GO:0098534 centriole assembly;GO:0051298 centrosome duplication		Predicted intracellular proteins; Disease related genes					0.0	0.0	1.0	0.0	0.0	0.0	0.0	0.0	0.0	0.0	0.0	1.0	0.0	0.0	1.0	0.0	0.0	0.0	0.0	0.0
CAST	831	symbol	H. sapiens	831	H. sapiens	CAST	calpastatin	GO:2000675 negative regulation of type B pancreatic cell apoptotic process;GO:0097340 inhibition of cysteine-type endopeptidase activity;GO:0097341 zymogen inhibition		Cancer-related genes:Mutational cancer driver genes; Predicted intracellular proteins; Disease related genes	Cytosol;Endoplasmic reticulum (Enhanced); Additional: Plasma membrane	Calcium; Artenimol		(M5945)HALLMARK HEME METABOLISM	0.0	0.0	0.0	0.0	0.0	0.0	0.0	0.0	0.0	0.0	0.0	0.0	0.0	0.0	0.0	0.0	0.0	0.0	0.0	0.0
ZNF300P1	134466	symbol	H. sapiens	134466	H. sapiens	ZNF300P1	zinc finger protein 300 pseudogene 1								0.0	0.0	0.0	0.0	0.0	0.0	0.0	0.0	0.0	0.0	0.0	0.0	0.0	0.0	0.0	0.0	0.0	0.0	0.0	0.0
C8orf33	65265	symbol	H. sapiens	65265	H. sapiens	C8orf33	chromosome 8 open reading frame 33			Predicted intracellular proteins	Nucleoplasm;Plasma membrane (Uncertain)				0.0	0.0	0.0	0.0	0.0	0.0	0.0	0.0	0.0	0.0	0.0	0.0	0.0	0.0	0.0	0.0	0.0	0.0	0.0	0.0
NAA16	79612	symbol	H. sapiens	79612	H. sapiens	NAA16	N-alpha-acetyltransferase 16, NatA auxiliary subunit	GO:0017196 N-terminal peptidyl-methionine acetylation;GO:0018206 peptidyl-methionine modification;GO:0006474 N-terminal protein amino acid acetylation		Predicted intracellular proteins	Cytosol (Enhanced)				0.0	0.0	0.0	0.0	0.0	1.0	0.0	0.0	0.0	0.0	0.0	0.0	0.0	0.0	0.0	0.0	0.0	0.0	0.0	0.0
PDK1	5163	symbol	H. sapiens	5163	H. sapiens	PDK1	pyruvate dehydrogenase kinase 1	GO:0010510 regulation of acetyl-CoA biosynthetic process from pyruvate;GO:0050812 regulation of acyl-CoA biosynthetic process;GO:0097411 hypoxia-inducible factor-1alpha signaling pathway	Atypical: PDK/BCKDK protein kinase family	ENZYME proteins:Transferases; Predicted intracellular proteins; Kinases:Atypical kinases; FDA approved drug targets:Small molecule drugs; Enzymes		4-[(3-CHLORO-4-{[(2R)-3,3,3-TRIFLUORO-2-HYDROXY-2-METHYLPROPANOYL]AMINO}PHENYL)SULFONYL]-N,N-DIMETHYLBENZAMIDE; Dichloroacetic acid		(M5923)HALLMARK PI3K AKT MTOR SIGNALING; (M5891)HALLMARK HYPOXIA; (M5924)HALLMARK MTORC1 SIGNALING	0.0	0.0	0.0	0.0	0.0	0.0	0.0	0.0	1.0	0.0	0.0	0.0	0.0	0.0	0.0	0.0	0.0	0.0	0.0	1.0
KMT2E	55904	symbol	H. sapiens	55904	H. sapiens	KMT2E	lysine methyltransferase 2E (inactive)	GO:1905435 regulation of histone H3-K4 trimethylation;GO:1905437 positive regulation of histone H3-K4 trimethylation;GO:0080182 histone H3-K4 trimethylation		Predicted intracellular proteins	Nucleoplasm (Supported); Additional: Nuclear bodies				0.0	0.0	0.0	0.0	0.0	1.0	0.0	0.0	0.0	1.0	0.0	0.0	0.0	0.0	0.0	0.0	0.0	0.0	0.0	0.0
HLA-DPA1	3113	symbol	H. sapiens	3113	H. sapiens	HLA-DPA1	major histocompatibility complex, class II, DP alpha 1	GO:0002399 MHC class II protein complex assembly;GO:0002503 peptide antigen assembly with MHC class II protein complex;GO:0002501 peptide antigen assembly with MHC protein complex		Predicted intracellular proteins	Vesicles (Supported)				0.0	0.0	0.0	0.0	0.0	0.0	0.0	0.0	0.0	0.0	0.0	0.0	0.0	0.0	0.0	0.0	0.0	0.0	0.0	1.0
SNRNP200	23020	symbol	H. sapiens	23020	H. sapiens	SNRNP200	small nuclear ribonucleoprotein U5 subunit 200	GO:0000388 spliceosome conformational change to release U4 (or U4atac) and U1 (or U11);GO:0000354 cis assembly of pre-catalytic spliceosome;GO:0000393 spliceosomal conformational changes to generate catalytic conformation		Disease related genes; Predicted intracellular proteins; Potential drug targets; ENZYME proteins:Hydrolases; Enzymes	Nucleoplasm (Supported)				1.0	0.0	0.0	0.0	0.0	0.0	0.0	0.0	0.0	0.0	0.0	0.0	0.0	0.0	0.0	0.0	0.0	0.0	0.0	0.0
RSPRY1	89970	symbol	H. sapiens	89970	H. sapiens	RSPRY1	ring finger and SPRY domain containing 1	GO:0051603 proteolysis involved in cellular protein catabolic process;GO:0016567 protein ubiquitination;GO:0044257 cellular protein catabolic process		Predicted intracellular proteins; Disease related genes; Predicted secreted proteins					0.0	0.0	0.0	0.0	0.0	0.0	0.0	0.0	0.0	0.0	1.0	0.0	0.0	0.0	0.0	0.0	0.0	0.0	0.0	0.0
GGNBP2	79893	symbol	H. sapiens	79893	H. sapiens	GGNBP2	gametogenetin binding protein 2	GO:0033140 negative regulation of peptidyl-serine phosphorylation of STAT protein;GO:0042532 negative regulation of tyrosine phosphorylation of STAT protein;GO:0060716 labyrinthine layer blood vessel development		Predicted intracellular proteins	Endoplasmic reticulum (Approved)				0.0	0.0	0.0	0.0	0.0	0.0	0.0	0.0	0.0	0.0	0.0	0.0	0.0	0.0	0.0	1.0	0.0	0.0	0.0	0.0
DHX36	170506	symbol	H. sapiens	170506	H. sapiens	DHX36	DEAH-box helicase 36	GO:1902064 regulation of transcription from RNA polymerase II promoter involved in spermatogenesis;GO:1904580 regulation of intracellular mRNA localization;GO:1904582 positive regulation of intracellular mRNA localization		Predicted intracellular proteins; Enzymes; ENZYME proteins:Hydrolases	Cytosol (Supported); Additional: Nucleoplasm				1.0	0.0	0.0	0.0	1.0	0.0	0.0	1.0	1.0	0.0	0.0	0.0	1.0	1.0	0.0	1.0	1.0	0.0	0.0	0.0
JMJD1C	221037	symbol	H. sapiens	221037	H. sapiens	JMJD1C	jumonji domain containing 1C	GO:0033169 histone H3-K9 demethylation;GO:0070076 histone lysine demethylation;GO:0016577 histone demethylation		Predicted intracellular proteins	Nucleoplasm (Supported); Additional: Cytosol				0.0	0.0	0.0	0.0	0.0	1.0	0.0	0.0	0.0	0.0	0.0	0.0	0.0	0.0	0.0	0.0	0.0	0.0	0.0	0.0
CHAMP1	283489	symbol	H. sapiens	283489	H. sapiens	CHAMP1	chromosome alignment maintaining phosphoprotein 1	GO:0031134 sister chromatid biorientation;GO:0051315 attachment of mitotic spindle microtubules to kinetochore;GO:0035372 protein localization to microtubule		Predicted intracellular proteins; Disease related genes	Nucleoplasm (Enhanced); Additional: Midbody ring;Nuclear bodies				0.0	0.0	0.0	0.0	0.0	0.0	0.0	0.0	0.0	0.0	0.0	0.0	0.0	0.0	0.0	0.0	0.0	1.0	0.0	1.0
PPP4R1L	55370	symbol	H. sapiens	55370	H. sapiens	PPP4R1L	protein phosphatase 4 regulatory subunit 1 like (pseudogene)	GO:0006470 protein dephosphorylation;GO:0016311 dephosphorylation;GO:0050790 regulation of catalytic activity							0.0	0.0	0.0	0.0	0.0	0.0	0.0	0.0	0.0	0.0	0.0	0.0	0.0	0.0	0.0	0.0	0.0	0.0	0.0	0.0
STPG1	90529	symbol	H. sapiens	90529	H. sapiens	STPG1	sperm tail PG-rich repeat containing 1	GO:1902110 positive regulation of mitochondrial membrane permeability involved in apoptotic process;GO:1902686 mitochondrial outer membrane permeabilization involved in programmed cell death;GO:0035794 positive regulation of mitochondrial membrane permeability		Predicted intracellular proteins	Nucleoplasm (Approved)				0.0	0.0	0.0	0.0	0.0	0.0	0.0	0.0	0.0	0.0	0.0	0.0	0.0	0.0	0.0	0.0	0.0	0.0	0.0	0.0
IFT80	57560	symbol	H. sapiens	57560	H. sapiens	IFT80	intraflagellar transport 80	GO:0061975 articular cartilage development;GO:0097500 receptor localization to non-motile cilium;GO:2000051 negative regulation of non-canonical Wnt signaling pathway		Predicted intracellular proteins; Disease related genes					0.0	0.0	1.0	0.0	0.0	0.0	0.0	0.0	0.0	0.0	0.0	0.0	0.0	0.0	0.0	0.0	0.0	0.0	0.0	0.0
LIMA1	51474	symbol	H. sapiens	51474	H. sapiens	LIMA1	LIM domain and actin binding 1	GO:0030299 intestinal cholesterol absorption;GO:0044241 lipid digestion;GO:0098856 intestinal lipid absorption		Predicted intracellular proteins	Actin filaments;Plasma membrane (Enhanced); Additional: Cytosol;Focal adhesion sites		(M232)PID ECADHERIN STABILIZATION PATHWAY	(M5915)HALLMARK APICAL JUNCTION	0.0	0.0	0.0	0.0	0.0	0.0	0.0	0.0	0.0	0.0	0.0	0.0	0.0	0.0	0.0	0.0	0.0	0.0	0.0	0.0
ZNF107	51427	symbol	H. sapiens	51427	H. sapiens	ZNF107	zinc finger protein 107	GO:0045944 positive regulation of transcription by RNA polymerase II;GO:0045893 positive regulation of transcription, DNA-templated;GO:1903508 positive regulation of nucleic acid-templated transcription		Transcription factors:Zinc-coordinating DNA-binding domains; Predicted intracellular proteins					0.0	0.0	0.0	0.0	0.0	0.0	0.0	0.0	0.0	0.0	0.0	0.0	0.0	0.0	0.0	0.0	0.0	0.0	0.0	0.0
RPRD1B	58490	symbol	H. sapiens	58490	H. sapiens	RPRD1B	regulation of nuclear pre-mRNA domain containing 1B	GO:0070940 dephosphorylation of RNA polymerase II C-terminal domain;GO:0031124 mRNA 3'-end processing;GO:0031123 RNA 3'-end processing		Predicted intracellular proteins	Nucleoplasm (Supported)				1.0	0.0	0.0	0.0	1.0	0.0	0.0	0.0	0.0	0.0	0.0	0.0	0.0	0.0	0.0	0.0	0.0	0.0	0.0	0.0
EMP1	2012	symbol	H. sapiens	2012	H. sapiens	EMP1	epithelial membrane protein 1	GO:0032060 bleb assembly;GO:0008544 epidermis development;GO:0120031 plasma membrane bounded cell projection assembly		Predicted intracellular proteins	Nucleoplasm (Approved)			(M5902)HALLMARK APOPTOSIS; (M5947)HALLMARK IL2 STAT5 SIGNALING; (M5953)HALLMARK KRAS SIGNALING UP	0.0	0.0	1.0	0.0	0.0	0.0	0.0	0.0	0.0	0.0	0.0	0.0	0.0	0.0	0.0	0.0	0.0	0.0	0.0	0.0
TUBGCP4	27229	symbol	H. sapiens	27229	H. sapiens	TUBGCP4	tubulin gamma complex associated protein 4	GO:0007020 microtubule nucleation;GO:0031122 cytoplasmic microtubule organization;GO:0046785 microtubule polymerization		Predicted intracellular proteins; Disease related genes	Centrosome (Supported)				0.0	0.0	0.0	1.0	0.0	0.0	0.0	0.0	0.0	0.0	0.0	1.0	0.0	0.0	1.0	0.0	0.0	0.0	0.0	0.0
PIK3CB	5291	symbol	H. sapiens	5291	H. sapiens	PIK3CB	phosphatidylinositol-4,5-bisphosphate 3-kinase catalytic subunit beta	GO:0033031 positive regulation of neutrophil apoptotic process;GO:0035022 positive regulation of Rac protein signal transduction;GO:0033029 regulation of neutrophil apoptotic process	Atypical: PI3/PI4-kinase family	ENZYME proteins:Transferases; Predicted intracellular proteins; RAS pathway related proteins; Cancer-related genes:Mutational cancer driver genes; Enzymes	Nucleoplasm (Supported); Additional: Midbody;Nucleoli;Vesicles	Caffeine; XL765	(M79)PID TRAIL PATHWAY; (M193)PID NEPHRIN NEPH1 PATHWAY; (M127)PID ERBB1 RECEPTOR PROXIMAL PATHWAY	(M5915)HALLMARK APICAL JUNCTION	0.0	0.0	0.0	0.0	0.0	0.0	0.0	0.0	1.0	0.0	0.0	0.0	0.0	0.0	0.0	0.0	0.0	0.0	1.0	1.0
HEATR5B	54497	symbol	H. sapiens	54497	H. sapiens	HEATR5B	HEAT repeat containing 5B	GO:0042147 retrograde transport, endosome to Golgi;GO:0016482 cytosolic transport;GO:0016197 endosomal transport		Predicted intracellular proteins	Nuclear speckles (Approved); Additional: Cytosol				0.0	0.0	0.0	0.0	0.0	0.0	0.0	0.0	0.0	0.0	0.0	0.0	0.0	0.0	0.0	0.0	0.0	0.0	0.0	0.0
STAM	8027	symbol	H. sapiens	8027	H. sapiens	STAM	signal transducing adaptor molecule	GO:0043328 protein transport to vacuole involved in ubiquitin-dependent protein catabolic process via the multivesicular body sorting pathway;GO:1903551 regulation of extracellular exosome assembly;GO:0071971 extracellular exosome assembly		Predicted intracellular proteins	Vesicles (Supported)		(M122)PID IL2 1PATHWAY	(M5910)HALLMARK PROTEIN SECRETION	0.0	0.0	0.0	0.0	0.0	0.0	1.0	0.0	0.0	0.0	1.0	0.0	0.0	0.0	1.0	0.0	0.0	0.0	1.0	0.0
ENO4	387712	symbol	H. sapiens	387712	H. sapiens	ENO4	enolase 4	GO:0006096 glycolytic process;GO:0006757 ATP generation from ADP;GO:0046031 ADP metabolic process		Predicted intracellular proteins; ENZYME proteins:Lyases; Enzymes	Mitochondria (Approved); Additional: Nucleoplasm				0.0	0.0	1.0	0.0	0.0	0.0	0.0	0.0	1.0	0.0	0.0	0.0	0.0	0.0	0.0	0.0	0.0	0.0	0.0	0.0
METTL4	64863	symbol	H. sapiens	64863	H. sapiens	METTL4	methyltransferase 4, N6-adenosine	GO:0032775 DNA methylation on adenine;GO:0120049 snRNA (adenine-N6)-methylation;GO:1903108 regulation of mitochondrial transcription		Predicted intracellular proteins	Mitochondria (Approved)				1.0	0.0	0.0	0.0	0.0	0.0	0.0	0.0	0.0	1.0	0.0	0.0	0.0	0.0	0.0	0.0	0.0	0.0	0.0	0.0
ZNF429	353088	symbol	H. sapiens	353088	H. sapiens	ZNF429	zinc finger protein 429	GO:0006357 regulation of transcription by RNA polymerase II;GO:0006366 transcription by RNA polymerase II;GO:0006355 regulation of transcription, DNA-templated		Transcription factors:Zinc-coordinating DNA-binding domains; Predicted intracellular proteins	Nucleoplasm (Approved)				0.0	0.0	0.0	0.0	0.0	0.0	0.0	0.0	0.0	0.0	0.0	0.0	0.0	0.0	0.0	0.0	0.0	0.0	0.0	0.0
TRIP4	9325	symbol	H. sapiens	9325	H. sapiens	TRIP4	thyroid hormone receptor interactor 4	GO:1990116 ribosome-associated ubiquitin-dependent protein catabolic process;GO:0072344 rescue of stalled ribosome;GO:1901998 toxin transport		Predicted intracellular proteins; Disease related genes; Cancer-related genes:Candidate cancer biomarkers	Nuclear bodies;Nucleoplasm (Supported)				0.0	0.0	0.0	0.0	0.0	0.0	0.0	0.0	1.0	0.0	1.0	0.0	0.0	0.0	0.0	0.0	0.0	0.0	0.0	0.0
DDX18	8886	symbol	H. sapiens	8886	H. sapiens	DDX18	DEAD-box helicase 18	GO:0000463 maturation of LSU-rRNA from tricistronic rRNA transcript (SSU-rRNA, 5.8S rRNA, LSU-rRNA);GO:0000470 maturation of LSU-rRNA;GO:0071392 cellular response to estradiol stimulus		Predicted intracellular proteins; Enzymes; ENZYME proteins:Hydrolases	Mitotic chromosome;Nucleoli;Nucleoli rim (Enhanced)		(M66)PID MYC ACTIV PATHWAY	(M5928)HALLMARK MYC TARGETS V2; (M5926)HALLMARK MYC TARGETS V1	0.0	0.0	0.0	0.0	0.0	0.0	0.0	0.0	0.0	0.0	0.0	0.0	0.0	0.0	0.0	0.0	0.0	0.0	0.0	0.0
SCARB2	950	symbol	H. sapiens	950	H. sapiens	SCARB2	scavenger receptor class B member 2	GO:1905123 regulation of glucosylceramidase activity;GO:1904978 regulation of endosome organization;GO:1905671 regulation of lysosome organization		Disease related genes	Cytosol (Approved)				0.0	0.0	0.0	0.0	0.0	0.0	1.0	0.0	0.0	0.0	0.0	0.0	0.0	0.0	0.0	0.0	0.0	0.0	0.0	0.0
MED23	9439	symbol	H. sapiens	9439	H. sapiens	MED23	mediator complex subunit 23	GO:0006367 transcription initiation from RNA polymerase II promoter;GO:0006352 DNA-templated transcription, initiation;GO:0010628 positive regulation of gene expression		Cancer-related genes:Mutated cancer genes; Predicted intracellular proteins; Disease related genes	Nucleoplasm;Vesicles (Approved)				0.0	0.0	0.0	0.0	0.0	0.0	0.0	0.0	0.0	0.0	0.0	0.0	0.0	0.0	0.0	0.0	1.0	0.0	0.0	0.0
NAT1	9	symbol	H. sapiens	9	H. sapiens	NAT1	N-acetyltransferase 1	GO:0006805 xenobiotic metabolic process;GO:0071466 cellular response to xenobiotic stimulus;GO:0009410 response to xenobiotic stimulus		Predicted intracellular proteins; Enzymes; ENZYME proteins:Transferases				(M5941)HALLMARK UV RESPONSE UP	0.0	0.0	0.0	0.0	0.0	0.0	0.0	0.0	0.0	0.0	0.0	0.0	0.0	0.0	0.0	0.0	0.0	0.0	0.0	0.0
CTAGE7P	119437	symbol	H. sapiens	119437	H. sapiens	CTAGE7P	CTAGE family member 7, pseudogene								0.0	0.0	0.0	0.0	0.0	0.0	0.0	0.0	0.0	0.0	0.0	0.0	0.0	0.0	0.0	0.0	0.0	0.0	0.0	0.0
CNOT8	9337	symbol	H. sapiens	9337	H. sapiens	CNOT8	CCR4-NOT transcription complex subunit 8	GO:0043928 exonucleolytic catabolism of deadenylated mRNA;GO:0000291 nuclear-transcribed mRNA catabolic process, exonucleolytic;GO:0090503 RNA phosphodiester bond hydrolysis, exonucleolytic		Predicted intracellular proteins; Enzymes; ENZYME proteins:Hydrolases					1.0	0.0	0.0	0.0	1.0	0.0	0.0	0.0	1.0	0.0	0.0	0.0	0.0	1.0	0.0	0.0	0.0	0.0	0.0	0.0
CAPRIN1	4076	symbol	H. sapiens	4076	H. sapiens	CAPRIN1	cell cycle associated protein 1	GO:0061003 positive regulation of dendritic spine morphogenesis;GO:0050775 positive regulation of dendrite morphogenesis;GO:0060999 positive regulation of dendritic spine development		Predicted intracellular proteins	Cytosol (Enhanced)				0.0	0.0	0.0	0.0	0.0	0.0	0.0	0.0	1.0	0.0	0.0	0.0	0.0	0.0	0.0	0.0	0.0	0.0	0.0	0.0
PRDM4	11108	symbol	H. sapiens	11108	H. sapiens	PRDM4	PR/SET domain 4	GO:0043985 histone H4-R3 methylation;GO:0034969 histone arginine methylation;GO:0018216 peptidyl-arginine methylation		Transcription factors:Zinc-coordinating DNA-binding domains; Predicted intracellular proteins	Nucleoplasm (Supported)		(M153)PID P75 NTR PATHWAY	(M5921)HALLMARK COMPLEMENT	0.0	0.0	0.0	0.0	0.0	1.0	0.0	0.0	0.0	1.0	0.0	0.0	0.0	0.0	0.0	0.0	0.0	0.0	0.0	1.0
GIN1	54826	symbol	H. sapiens	54826	H. sapiens	GIN1	gypsy retrotransposon integrase 1	GO:0015074 DNA integration;GO:0006259 DNA metabolic process;GO:0090304 nucleic acid metabolic process		Predicted intracellular proteins	Nucleoli;Nucleoplasm (Approved)				0.0	0.0	0.0	0.0	0.0	0.0	0.0	0.0	0.0	0.0	0.0	0.0	0.0	0.0	0.0	0.0	0.0	0.0	0.0	0.0
HOXD11	3237	symbol	H. sapiens	3237	H. sapiens	HOXD11	homeobox D11	GO:0001658 branching involved in ureteric bud morphogenesis;GO:0060675 ureteric bud morphogenesis;GO:0072171 mesonephric tubule morphogenesis		Predicted intracellular proteins; Transcription factors:Helix-turn-helix domains; Cancer-related genes	Nucleoplasm (Supported)			(M5953)HALLMARK KRAS SIGNALING UP	0.0	0.0	0.0	0.0	0.0	0.0	0.0	0.0	0.0	0.0	0.0	0.0	0.0	0.0	0.0	0.0	0.0	0.0	0.0	0.0
FAM19A2	338811	gene_synonym	H. sapiens	338811	H. sapiens	TAFA2	TAFA chemokine like family member 2	GO:0008542 visual learning;GO:0007632 visual behavior;GO:0008306 associative learning		Predicted intracellular proteins					0.0	0.0	0.0	0.0	0.0	0.0	0.0	0.0	0.0	0.0	0.0	0.0	0.0	0.0	0.0	0.0	0.0	0.0	0.0	0.0
RNMT	8731	symbol	H. sapiens	8731	H. sapiens	RNMT	RNA guanine-7 methyltransferase	GO:0106005 RNA 5'-cap (guanine-N7)-methylation;GO:0036265 RNA (guanine-N7)-methylation;GO:0006370 7-methylguanosine mRNA capping		Predicted intracellular proteins; Enzymes; ENZYME proteins:Transferases	Nucleoplasm (Supported); Additional: Nucleoli fibrillar center			(M5898)HALLMARK DNA REPAIR	1.0	0.0	0.0	0.0	0.0	0.0	0.0	0.0	0.0	1.0	0.0	0.0	0.0	0.0	0.0	0.0	0.0	0.0	0.0	0.0
KLF14	136259	symbol	H. sapiens	136259	H. sapiens	KLF14	Kruppel like factor 14	GO:1902068 regulation of sphingolipid mediated signaling pathway;GO:1902070 positive regulation of sphingolipid mediated signaling pathway;GO:0090520 sphingolipid mediated signaling pathway		Predicted intracellular proteins					0.0	0.0	0.0	0.0	0.0	0.0	0.0	0.0	0.0	0.0	0.0	0.0	0.0	0.0	0.0	0.0	0.0	0.0	0.0	0.0
NXT2	55916	symbol	H. sapiens	55916	H. sapiens	NXT2	nuclear transport factor 2 like export factor 2	GO:0051028 mRNA transport;GO:0006606 protein import into nucleus;GO:0051170 import into nucleus		Predicted intracellular proteins	Cytosol;Nucleoplasm (Supported)				0.0	0.0	0.0	0.0	0.0	0.0	1.0	0.0	0.0	0.0	0.0	0.0	1.0	0.0	0.0	0.0	0.0	0.0	0.0	0.0
BBS12	166379	symbol	H. sapiens	166379	H. sapiens	BBS12	Bardet-Biedl syndrome 12	GO:0051131 chaperone-mediated protein complex assembly;GO:0042755 eating behavior;GO:0042073 intraciliary transport		Predicted intracellular proteins; Disease related genes					0.0	0.0	1.0	0.0	0.0	0.0	0.0	0.0	0.0	0.0	0.0	0.0	1.0	0.0	0.0	0.0	0.0	0.0	0.0	0.0
CLOCK	9575	symbol	H. sapiens	9575	H. sapiens	CLOCK	clock circadian regulator	GO:2000323 negative regulation of glucocorticoid receptor signaling pathway;GO:2000322 regulation of glucocorticoid receptor signaling pathway;GO:2000074 regulation of type B pancreatic cell development		Transcription factors:Basic domains; Predicted intracellular proteins; Enzymes; ENZYME proteins:Transferases	Nucleoplasm (Enhanced); Additional: Vesicles		(M95)PID CIRCADIAN PATHWAY		0.0	1.0	0.0	0.0	0.0	1.0	0.0	0.0	0.0	0.0	1.0	0.0	0.0	0.0	0.0	1.0	1.0	0.0	0.0	0.0
NUDT21	11051	symbol	H. sapiens	11051	H. sapiens	NUDT21	nudix hydrolase 21	GO:0031437 regulation of mRNA cleavage;GO:0031439 positive regulation of mRNA cleavage;GO:2000975 positive regulation of pro-B cell differentiation		Predicted intracellular proteins	Nuclear bodies (Supported); Additional: Centriolar satellite			(M5898)HALLMARK DNA REPAIR; (M5925)HALLMARK E2F TARGETS	1.0	0.0	0.0	0.0	1.0	0.0	0.0	0.0	1.0	0.0	0.0	0.0	0.0	0.0	0.0	0.0	0.0	0.0	0.0	0.0
EHBP1	23301	symbol	H. sapiens	23301	H. sapiens	EHBP1	EH domain binding protein 1	GO:0006897 endocytosis;GO:0030036 actin cytoskeleton organization;GO:0030029 actin filament-based process		Predicted intracellular proteins; Disease related genes	Plasma membrane (Enhanced); Additional: Cytosol				0.0	0.0	0.0	0.0	0.0	0.0	0.0	0.0	0.0	0.0	0.0	0.0	0.0	0.0	0.0	0.0	0.0	0.0	0.0	0.0
USP48	84196	symbol	H. sapiens	84196	H. sapiens	USP48	ubiquitin specific peptidase 48	GO:0016579 protein deubiquitination;GO:0070646 protein modification by small protein removal;GO:0006511 ubiquitin-dependent protein catabolic process		Predicted intracellular proteins; Peptidases:Cysteine-type peptidases; Enzymes; ENZYME proteins:Hydrolases	Nucleoplasm (Supported); Additional: Cytosol;Mitochondria				0.0	0.0	0.0	0.0	0.0	0.0	0.0	0.0	0.0	0.0	1.0	0.0	0.0	0.0	0.0	0.0	0.0	0.0	0.0	0.0
RNF2	6045	symbol	H. sapiens	6045	H. sapiens	RNF2	ring finger protein 2	GO:0036353 histone H2A-K119 monoubiquitination;GO:0035518 histone H2A monoubiquitination;GO:0001702 gastrulation with mouth forming second		Predicted intracellular proteins; Enzymes; ENZYME proteins:Transferases	Nucleoplasm (Enhanced); Additional: Nuclear bodies				0.0	0.0	0.0	0.0	0.0	1.0	0.0	0.0	0.0	0.0	0.0	0.0	0.0	0.0	0.0	1.0	0.0	0.0	0.0	0.0
TIAL1	7073	symbol	H. sapiens	7073	H. sapiens	TIAL1	TIA1 cytotoxic granule associated RNA binding protein like 1	GO:0035332 positive regulation of hippo signaling;GO:0035330 regulation of hippo signaling;GO:0017145 stem cell division		Predicted intracellular proteins	Nucleoplasm;Vesicles (Approved)			(M5915)HALLMARK APICAL JUNCTION	0.0	0.0	0.0	1.0	0.0	0.0	0.0	0.0	0.0	0.0	0.0	0.0	0.0	0.0	0.0	1.0	0.0	0.0	1.0	0.0
RSPO3	84870	symbol	H. sapiens	84870	H. sapiens	RSPO3	R-spondin 3	GO:2000096 positive regulation of Wnt signaling pathway, planar cell polarity pathway;GO:0060670 branching involved in labyrinthine layer morphogenesis;GO:2000052 positive regulation of non-canonical Wnt signaling pathway		Predicted secreted proteins; Cancer-related genes			(M3008)NABA ECM GLYCOPROTEINS; (M5884)NABA CORE MATRISOME; (M5889)NABA MATRISOME		0.0	0.0	0.0	0.0	0.0	0.0	0.0	0.0	0.0	0.0	0.0	0.0	0.0	0.0	0.0	0.0	0.0	0.0	0.0	0.0
CERKL	375298	symbol	H. sapiens	375298	H. sapiens	CERKL	ceramide kinase like	GO:0046834 lipid phosphorylation;GO:0030148 sphingolipid biosynthetic process;GO:0046467 membrane lipid biosynthetic process		Predicted intracellular proteins; Disease related genes	Cytosol;Nucleoplasm (Approved)				0.0	0.0	0.0	0.0	0.0	0.0	0.0	0.0	0.0	0.0	0.0	0.0	0.0	0.0	0.0	0.0	0.0	0.0	0.0	0.0
SLAMF8	56833	symbol	H. sapiens	56833	H. sapiens	SLAMF8	SLAM family member 8	GO:0002336 B-1 B cell lineage commitment;GO:2000509 negative regulation of dendritic cell chemotaxis;GO:0001923 B-1 B cell differentiation		CD markers					0.0	0.0	0.0	0.0	0.0	0.0	0.0	0.0	0.0	0.0	0.0	0.0	0.0	0.0	0.0	0.0	0.0	0.0	0.0	0.0
SEC61A2	55176	symbol	H. sapiens	55176	H. sapiens	SEC61A2	SEC61 translocon subunit alpha 2	GO:0031204 posttranslational protein targeting to membrane, translocation;GO:0006616 SRP-dependent cotranslational protein targeting to membrane, translocation;GO:0006620 posttranslational protein targeting to endoplasmic reticulum membrane		Transporters:Primary Active Transporters					0.0	0.0	0.0	0.0	0.0	0.0	1.0	0.0	0.0	0.0	0.0	0.0	0.0	0.0	0.0	0.0	0.0	0.0	0.0	0.0
LNX1	84708	symbol	H. sapiens	84708	H. sapiens	LNX1	ligand of numb-protein X 1	GO:0006511 ubiquitin-dependent protein catabolic process;GO:0019941 modification-dependent protein catabolic process;GO:0043632 modification-dependent macromolecule catabolic process		Predicted intracellular proteins; Enzymes; ENZYME proteins:Transferases	Cell Junctions (Supported); Additional: Cytosol		(M17)PID NOTCH PATHWAY		0.0	0.0	0.0	0.0	0.0	0.0	0.0	0.0	0.0	0.0	1.0	0.0	0.0	0.0	0.0	0.0	0.0	0.0	0.0	0.0
HMGN4	10473	symbol	H. sapiens	10473	H. sapiens	HMGN4	high mobility group nucleosomal binding domain 4	GO:0006325 chromatin organization;GO:0051276 chromosome organization;GO:0006996 organelle organization		Predicted intracellular proteins	Nucleoplasm (Uncertain)				0.0	0.0	0.0	0.0	0.0	0.0	0.0	0.0	0.0	0.0	0.0	0.0	0.0	0.0	0.0	0.0	0.0	0.0	0.0	0.0
ACTR10	55860	symbol	H. sapiens	55860	H. sapiens	ACTR10	actin related protein 10	GO:0098958 retrograde axonal transport of mitochondrion;GO:0019896 axonal transport of mitochondrion;GO:0008090 retrograde axonal transport		Predicted intracellular proteins	Focal adhesion sites;Plasma membrane;Vesicles (Approved)				0.0	0.0	0.0	0.0	0.0	0.0	0.0	0.0	0.0	0.0	0.0	0.0	0.0	0.0	0.0	0.0	0.0	0.0	0.0	0.0
STMN2	11075	symbol	H. sapiens	11075	H. sapiens	STMN2	stathmin 2	GO:0031117 positive regulation of microtubule depolymerization;GO:0031115 negative regulation of microtubule polymerization;GO:1901881 positive regulation of protein depolymerization		Predicted intracellular proteins	Vesicles (Approved); Additional: Endoplasmic reticulum				0.0	0.0	0.0	0.0	0.0	0.0	0.0	1.0	0.0	0.0	0.0	1.0	0.0	0.0	0.0	0.0	0.0	0.0	0.0	0.0
ZNF37BP	100129482	symbol	H. sapiens	100129482	H. sapiens	ZNF37BP	zinc finger protein 37B, pseudogene								0.0	0.0	0.0	0.0	0.0	0.0	0.0	0.0	0.0	0.0	0.0	0.0	0.0	0.0	0.0	0.0	0.0	0.0	0.0	0.0
RFC1	5981	symbol	H. sapiens	5981	H. sapiens	RFC1	replication factor C subunit 1	GO:0090618 DNA clamp unloading;GO:0007004 telomere maintenance via telomerase;GO:0006278 RNA-dependent DNA biosynthetic process		Predicted intracellular proteins	Nucleoplasm (Enhanced)		(M94)PID FAS PATHWAY	(M5893)HALLMARK MITOTIC SPINDLE; (M5925)HALLMARK E2F TARGETS	0.0	1.0	0.0	1.0	0.0	0.0	0.0	0.0	0.0	0.0	0.0	0.0	0.0	1.0	0.0	0.0	0.0	0.0	0.0	1.0
HOXA5	3202	symbol	H. sapiens	3202	H. sapiens	HOXA5	homeobox A5	GO:0060764 cell-cell signaling involved in mammary gland development;GO:0060535 trachea cartilage morphogenesis;GO:0060574 intestinal epithelial cell maturation		Predicted intracellular proteins; Transcription factors:Helix-turn-helix domains; Cancer-related genes:Candidate cancer biomarkers					0.0	0.0	0.0	0.0	0.0	0.0	0.0	0.0	0.0	0.0	0.0	0.0	0.0	0.0	0.0	0.0	0.0	0.0	0.0	0.0
TULP3	7289	symbol	H. sapiens	7289	H. sapiens	TULP3	TUB like protein 3	GO:0021914 negative regulation of smoothened signaling pathway involved in ventral spinal cord patterning;GO:0060434 bronchus morphogenesis;GO:1901621 negative regulation of smoothened signaling pathway involved in dorsal/ventral neural tube patterning		Predicted intracellular proteins; Predicted secreted proteins	Nucleoli;Nucleoplasm (Supported); Additional: Plasma membrane				0.0	0.0	1.0	0.0	0.0	0.0	0.0	0.0	0.0	0.0	0.0	0.0	0.0	0.0	0.0	0.0	0.0	0.0	0.0	0.0
MX2	4600	symbol	H. sapiens	4600	H. sapiens	MX2	MX dynamin like GTPase 2	GO:0035455 response to interferon-alpha;GO:0046822 regulation of nucleocytoplasmic transport;GO:0051028 mRNA transport		Predicted intracellular proteins; Transporters:Transporter channels and pores				(M5913)HALLMARK INTERFERON GAMMA RESPONSE	0.0	0.0	0.0	0.0	0.0	0.0	1.0	0.0	0.0	0.0	0.0	0.0	1.0	0.0	0.0	0.0	0.0	0.0	0.0	1.0
BORA	79866	symbol	H. sapiens	79866	H. sapiens	BORA	BORA aurora kinase A activator	GO:0060236 regulation of mitotic spindle organization;GO:0090224 regulation of spindle organization;GO:0007088 regulation of mitotic nuclear division		Predicted intracellular proteins	Nucleoli fibrillar center;Nucleoplasm (Approved); Additional: Cytosol		(M129)PID PLK1 PATHWAY		0.0	0.0	0.0	1.0	0.0	0.0	0.0	0.0	0.0	0.0	0.0	1.0	0.0	0.0	0.0	0.0	0.0	1.0	0.0	0.0
LINC00900	283143	symbol	H. sapiens	283143	H. sapiens	LINC00900	long intergenic non-protein coding RNA 900								0.0	0.0	0.0	0.0	0.0	0.0	0.0	0.0	0.0	0.0	0.0	0.0	0.0	0.0	0.0	0.0	0.0	0.0	0.0	0.0
CARF	79800	symbol	H. sapiens	79800	H. sapiens	CARF	calcium responsive transcription factor	GO:0061400 positive regulation of transcription from RNA polymerase II promoter in response to calcium ion;GO:0035865 cellular response to potassium ion;GO:0035864 response to potassium ion		Predicted intracellular proteins	Vesicles (Approved); Additional: Cytosol;Nucleoli fibrillar center				0.0	0.0	0.0	0.0	0.0	0.0	0.0	0.0	0.0	0.0	0.0	0.0	0.0	0.0	0.0	0.0	0.0	0.0	0.0	0.0
HNRNPH3	3189	symbol	H. sapiens	3189	H. sapiens	HNRNPH3	heterogeneous nuclear ribonucleoprotein H3	GO:0043484 regulation of RNA splicing;GO:0000377 RNA splicing, via transesterification reactions with bulged adenosine as nucleophile;GO:0000398 mRNA splicing, via spliceosome		Predicted intracellular proteins	Nucleoplasm (Supported)	Copper			1.0	0.0	0.0	0.0	0.0	0.0	0.0	0.0	0.0	0.0	0.0	0.0	0.0	0.0	0.0	0.0	0.0	0.0	0.0	0.0
PDPR	55066	symbol	H. sapiens	55066	H. sapiens	PDPR	pyruvate dehydrogenase phosphatase regulatory subunit			Predicted intracellular proteins	Mitochondria (Approved)				0.0	0.0	0.0	0.0	0.0	0.0	0.0	0.0	0.0	0.0	0.0	0.0	0.0	0.0	0.0	0.0	0.0	0.0	0.0	0.0
NDRG1	10397	symbol	H. sapiens	10397	H. sapiens	NDRG1	N-myc downstream regulated 1	GO:0032287 peripheral nervous system myelin maintenance;GO:0043217 myelin maintenance;GO:0022011 myelination in peripheral nervous system		Predicted intracellular proteins; Disease related genes; Cancer-related genes:Candidate cancer biomarkers	Cytosol (Supported); Additional: Microtubules		(M254)PID MYC REPRESS PATHWAY; (M255)PID HIF1 TFPATHWAY; (M145)PID P53 DOWNSTREAM PATHWAY	(M5908)HALLMARK ANDROGEN RESPONSE; (M5947)HALLMARK IL2 STAT5 SIGNALING; (M5891)HALLMARK HYPOXIA	0.0	1.0	0.0	0.0	0.0	0.0	0.0	0.0	0.0	0.0	0.0	0.0	0.0	1.0	0.0	0.0	0.0	0.0	0.0	0.0
NLN	57486	symbol	H. sapiens	57486	H. sapiens	NLN	neurolysin	GO:1902809 regulation of skeletal muscle fiber differentiation;GO:0098528 skeletal muscle fiber differentiation;GO:2001014 regulation of skeletal muscle cell differentiation		Predicted intracellular proteins; Peptidases:Metallopeptidases; Enzymes; ENZYME proteins:Hydrolases	Mitochondria (Approved)				0.0	0.0	0.0	0.0	0.0	0.0	0.0	0.0	0.0	0.0	0.0	0.0	0.0	0.0	0.0	0.0	0.0	0.0	0.0	0.0
CECR1	51816	gene_synonym	H. sapiens	51816	H. sapiens	ADA2	adenosine deaminase 2	GO:0046103 inosine biosynthetic process;GO:0006154 adenosine catabolic process;GO:0046102 inosine metabolic process		Disease related genes; Predicted intracellular proteins; Potential drug targets; ENZYME proteins:Hydrolases; Predicted secreted proteins; Enzymes					0.0	0.0	0.0	0.0	0.0	0.0	0.0	0.0	1.0	0.0	0.0	0.0	0.0	0.0	0.0	0.0	0.0	0.0	0.0	0.0
CHI3L2	1117	symbol	H. sapiens	1117	H. sapiens	CHI3L2	chitinase 3 like 2	GO:0006030 chitin metabolic process;GO:0006032 chitin catabolic process;GO:1901072 glucosamine-containing compound catabolic process		Predicted intracellular proteins; Predicted secreted proteins					0.0	0.0	0.0	0.0	0.0	0.0	0.0	0.0	0.0	0.0	0.0	0.0	0.0	0.0	0.0	0.0	0.0	0.0	0.0	0.0
TAS2R4	50832	symbol	H. sapiens	50832	H. sapiens	TAS2R4	taste 2 receptor member 4	GO:0001580 detection of chemical stimulus involved in sensory perception of bitter taste;GO:0050913 sensory perception of bitter taste;GO:0050912 detection of chemical stimulus involved in sensory perception of taste		G-protein coupled receptors:Family T2R receptors (taste receptor GPCRs); G-protein coupled receptors:GPCRs excl olfactory receptors				(M5956)HALLMARK KRAS SIGNALING DN	0.0	0.0	0.0	0.0	0.0	0.0	0.0	0.0	0.0	0.0	0.0	0.0	0.0	0.0	0.0	0.0	0.0	0.0	0.0	0.0
AGO4	192670	symbol	H. sapiens	192670	H. sapiens	AGO4	argonaute RISC component 4	GO:0090625 mRNA cleavage involved in gene silencing by siRNA;GO:0035279 mRNA cleavage involved in gene silencing by miRNA;GO:0098795 mRNA cleavage involved in gene silencing		Predicted intracellular proteins	Cytoplasmic bodies (Supported); Additional: Cytosol			(M5898)HALLMARK DNA REPAIR	1.0	0.0	0.0	0.0	0.0	0.0	0.0	0.0	1.0	0.0	0.0	0.0	0.0	1.0	0.0	1.0	0.0	1.0	0.0	0.0
C4orf33	132321	symbol	H. sapiens	132321	H. sapiens	C4orf33	chromosome 4 open reading frame 33			Predicted intracellular proteins	Golgi apparatus (Approved); Additional: Nuclear bodies				0.0	0.0	0.0	0.0	0.0	0.0	0.0	0.0	0.0	0.0	0.0	0.0	0.0	0.0	0.0	0.0	0.0	0.0	0.0	0.0
CSTF1	1477	symbol	H. sapiens	1477	H. sapiens	CSTF1	cleavage stimulation factor subunit 1	GO:0031124 mRNA 3'-end processing;GO:0031123 RNA 3'-end processing;GO:0006397 mRNA processing		Predicted intracellular proteins	Nucleoplasm (Enhanced)		(M258)PID BARD1 PATHWAY		1.0	0.0	0.0	0.0	1.0	0.0	0.0	0.0	0.0	0.0	0.0	0.0	0.0	1.0	0.0	0.0	0.0	0.0	0.0	0.0
ZNF248	57209	symbol	H. sapiens	57209	H. sapiens	ZNF248	zinc finger protein 248	GO:0000122 negative regulation of transcription by RNA polymerase II;GO:0045892 negative regulation of transcription, DNA-templated;GO:1903507 negative regulation of nucleic acid-templated transcription		Transcription factors:Zinc-coordinating DNA-binding domains; Predicted intracellular proteins	Nucleoplasm (Approved)				0.0	0.0	0.0	0.0	0.0	0.0	0.0	0.0	0.0	0.0	0.0	0.0	0.0	0.0	0.0	0.0	0.0	0.0	0.0	0.0
PTGFR	5737	symbol	H. sapiens	5737	H. sapiens	PTGFR	prostaglandin F receptor	GO:0071798 response to prostaglandin D;GO:0071799 cellular response to prostaglandin D stimulus;GO:0007567 parturition		FDA approved drug targets:Small molecule drugs; G-protein coupled receptors:GPCRs excl olfactory receptors		Travoprost; Latanoprost; Bimatoprost; Dinoprost tromethamine; Tafluprost; Latanoprostene bunod		(M5942)HALLMARK UV RESPONSE DN; (M5956)HALLMARK KRAS SIGNALING DN	0.0	0.0	0.0	0.0	0.0	0.0	0.0	0.0	0.0	0.0	0.0	0.0	0.0	0.0	0.0	0.0	0.0	0.0	0.0	0.0
SNX24	28966	symbol	H. sapiens	28966	H. sapiens	SNX24	sorting nexin 24	GO:0015031 protein transport;GO:0045184 establishment of protein localization;GO:0071705 nitrogen compound transport		Predicted intracellular proteins	Vesicles (Approved)			(M5906)HALLMARK ESTROGEN RESPONSE EARLY	0.0	0.0	0.0	0.0	0.0	0.0	0.0	0.0	0.0	0.0	0.0	0.0	0.0	0.0	0.0	0.0	0.0	0.0	0.0	0.0
CTSB	1508	symbol	H. sapiens	1508	H. sapiens	CTSB	cathepsin B	GO:0097067 cellular response to thyroid hormone stimulus;GO:0006590 thyroid hormone generation;GO:0097066 response to thyroid hormone		Peptidases:Cysteine-type peptidases; ENZYME proteins:Hydrolases; Cancer-related genes:Candidate cancer biomarkers; Candidate cardiovascular disease genes; Predicted secreted proteins; Enzymes	Vesicles (Supported); Additional: Nucleoli	2-Aminoethanimidic Acid; 3-Amino-4-Oxybenzyl-2-Butanone; 3-Methylphenylalanine; N-(3-Propylcarbamoyloxirane-2-Carbonyl)-Isoleucyl-Proline; 2-Pyridinethiol; Diphenylacetic acid; N-[1-Hydroxycarboxyethyl-Carbonyl]Leucylamino-2-Methyl-Butane; N-{[(2S,3S)-3-(Ethoxycarbonyl)-2-oxiranyl]carbonyl}-L-threonyl-L-isoleucine; N-{[(2S,3S)-3-(ETHOXYCARBONYL)OXIRAN-2-YL]CARBONYL}-L-ISOLEUCINE; BENZYL N-({(2S,3…	(M3468)NABA ECM REGULATORS; (M5885)NABA MATRISOME ASSOCIATED; (M5889)NABA MATRISOME	(M5946)HALLMARK COAGULATION; (M5921)HALLMARK COMPLEMENT; (M5945)HALLMARK HEME METABOLISM	0.0	0.0	0.0	0.0	0.0	0.0	0.0	0.0	0.0	0.0	1.0	0.0	0.0	0.0	0.0	0.0	0.0	0.0	0.0	1.0
HNRNPA2B1	3181	symbol	H. sapiens	3181	H. sapiens	HNRNPA2B1	heterogeneous nuclear ribonucleoprotein A2/B1	GO:1905663 positive regulation of telomerase RNA reverse transcriptase activity;GO:1905661 regulation of telomerase RNA reverse transcriptase activity;GO:1990428 miRNA transport		Predicted intracellular proteins; Disease related genes; Cancer-related genes	Nucleoplasm (Enhanced)	Copper; Artenimol		(M5926)HALLMARK MYC TARGETS V1	1.0	0.0	0.0	0.0	0.0	0.0	1.0	1.0	0.0	0.0	0.0	0.0	1.0	1.0	0.0	0.0	0.0	0.0	0.0	1.0
CEP44	80817	symbol	H. sapiens	80817	H. sapiens	CEP44	centrosomal protein 44	GO:0010457 centriole-centriole cohesion;GO:0007099 centriole replication;GO:0098534 centriole assembly		Predicted intracellular proteins					0.0	0.0	1.0	0.0	0.0	0.0	0.0	0.0	0.0	0.0	0.0	1.0	0.0	0.0	1.0	0.0	0.0	0.0	0.0	0.0
PPWD1	23398	symbol	H. sapiens	23398	H. sapiens	PPWD1	peptidylprolyl isomerase domain and WD repeat containing 1	GO:0000413 protein peptidyl-prolyl isomerization;GO:0018208 peptidyl-proline modification;GO:0000377 RNA splicing, via transesterification reactions with bulged adenosine as nucleophile		Predicted intracellular proteins; ENZYME proteins:Isomerase; Enzymes	Nuclear bodies (Supported)				1.0	0.0	0.0	0.0	0.0	0.0	0.0	0.0	0.0	0.0	0.0	0.0	0.0	0.0	0.0	0.0	0.0	0.0	0.0	0.0
MAPK8	5599	symbol	H. sapiens	5599	H. sapiens	MAPK8	mitogen-activated protein kinase 8	GO:1902595 regulation of DNA replication origin binding;GO:0007258 JUN phosphorylation;GO:1900739 regulation of protein insertion into mitochondrial membrane involved in apoptotic signaling pathway	CMGC Ser/Thr protein kinase family	ENZYME proteins:Transferases; Kinases:CMGC Ser/Thr protein kinases; Predicted intracellular proteins; RAS pathway related proteins; Cancer-related genes:Candidate cancer biomarkers; Enzymes		Tamoxifen; Pyrazolanthrone; 6-CHLORO-9-HYDROXY-1,3-DIMETHYL-1,9-DIHYDRO-4H-PYRAZOLO[3,4-B]QUINOLIN-4-ONE; 2-({2-[(3-HYDROXYPHENYL)AMINO]PYRIMIDIN-4-YL}AMINO)BENZAMIDE; N-(4-AMINO-5-CYANO-6-ETHOXYPYRIDIN-2-YL)-2-(4-BROMO-2,5-DIMETHOXYPHENYL)ACETAMIDE; 5-CYANO-N-(2,5-DIMETHOXYBENZYL)-6-ETHOXYPYRIDINE-2-CARBOXAMIDE; 2-fluoro-6-{[2-({2-methoxy-4-[(methylsulfonyl)methyl]phenyl}amino)-7H-pyrrolo[2,3-d]…	(M190)PID TCR JNK PATHWAY; (M268)PID S1P S1P2 PATHWAY; (M69)PID REELIN PATHWAY	(M5923)HALLMARK PI3K AKT MTOR SIGNALING	0.0	1.0	0.0	0.0	0.0	1.0	1.0	1.0	0.0	1.0	0.0	0.0	0.0	1.0	0.0	0.0	0.0	0.0	1.0	1.0
PDZD11	51248	symbol	H. sapiens	51248	H. sapiens	PDZD11	PDZ domain containing 11	GO:1903361 protein localization to basolateral plasma membrane;GO:0035090 maintenance of apical/basal cell polarity;GO:0045199 maintenance of epithelial cell apical/basal polarity		Predicted intracellular proteins					0.0	0.0	0.0	0.0	0.0	0.0	0.0	0.0	0.0	0.0	0.0	0.0	0.0	0.0	0.0	0.0	0.0	0.0	0.0	0.0
WIPF1	7456	symbol	H. sapiens	7456	H. sapiens	WIPF1	WAS/WASL interacting protein family member 1	GO:0030048 actin filament-based movement;GO:0008154 actin polymerization or depolymerization;GO:0007015 actin filament organization		Predicted intracellular proteins; Disease related genes	Cytosol (Approved); Additional: Plasma membrane		(M7)PID FCER1 PATHWAY	(M5930)HALLMARK EPITHELIAL MESENCHYMAL TRANSITION	0.0	0.0	0.0	0.0	0.0	0.0	0.0	0.0	0.0	0.0	0.0	0.0	0.0	0.0	0.0	0.0	0.0	0.0	1.0	0.0
IREB2	3658	symbol	H. sapiens	3658	H. sapiens	IREB2	iron responsive element binding protein 2	GO:0006101 citrate metabolic process;GO:0006782 protoporphyrinogen IX biosynthetic process;GO:0046501 protoporphyrinogen IX metabolic process		Predicted intracellular proteins	Cell Junctions (Approved); Additional: Cytosol		(M66)PID MYC ACTIV PATHWAY		0.0	0.0	0.0	0.0	0.0	0.0	0.0	0.0	1.0	0.0	0.0	0.0	0.0	0.0	0.0	0.0	0.0	0.0	0.0	0.0
PLEKHA5	54477	symbol	H. sapiens	54477	H. sapiens	PLEKHA5	pleckstrin homology domain containing A5	GO:0061458 reproductive system development;GO:0048731 system development;GO:0007275 multicellular organism development		Predicted intracellular proteins	Cytosol;Nucleoplasm (Approved)				0.0	0.0	0.0	0.0	0.0	0.0	0.0	0.0	0.0	0.0	0.0	0.0	0.0	0.0	0.0	0.0	0.0	0.0	0.0	0.0
NSUN6	221078	symbol	H. sapiens	221078	H. sapiens	NSUN6	NOP2/Sun RNA methyltransferase 6	GO:0002946 tRNA C5-cytosine methylation;GO:0030488 tRNA methylation;GO:0001510 RNA methylation		Predicted intracellular proteins	Golgi apparatus (Approved)				1.0	0.0	0.0	0.0	0.0	0.0	0.0	0.0	0.0	1.0	0.0	0.0	0.0	0.0	0.0	0.0	0.0	0.0	0.0	0.0
OTOGL	283310	symbol	H. sapiens	283310	H. sapiens	OTOGL	otogelin like	GO:0019566 arabinose metabolic process;GO:0046373 L-arabinose metabolic process;GO:0019321 pentose metabolic process		Predicted intracellular proteins; Disease related genes	Cytosol (Approved)				0.0	0.0	0.0	0.0	0.0	0.0	0.0	0.0	0.0	0.0	0.0	0.0	0.0	0.0	0.0	0.0	0.0	0.0	0.0	0.0
CBX7	23492	symbol	H. sapiens	23492	H. sapiens	CBX7	chromobox 7	GO:0006325 chromatin organization;GO:0051276 chromosome organization;GO:0000122 negative regulation of transcription by RNA polymerase II		Predicted intracellular proteins	Nucleoplasm (Supported); Additional: Cytosol				0.0	0.0	0.0	0.0	0.0	0.0	0.0	0.0	0.0	0.0	0.0	0.0	0.0	0.0	0.0	0.0	0.0	0.0	0.0	0.0
ACADM	34	symbol	H. sapiens	34	H. sapiens	ACADM	acyl-CoA dehydrogenase medium chain	GO:0019254 carnitine metabolic process, CoA-linked;GO:0045329 carnitine biosynthetic process;GO:0051793 medium-chain fatty acid catabolic process		Disease related genes; Predicted intracellular proteins; ENZYME proteins:Oxidoreductases; Potential drug targets; Enzymes	Mitochondria (Enhanced)	Octanoyl-Coenzyme A; Flavin adenine dinucleotide; 3-thiaoctanoyl-CoA	(M106)PID HNF3B PATHWAY	(M5935)HALLMARK FATTY ACID METABOLISM; (M5905)HALLMARK ADIPOGENESIS; (M5936)HALLMARK OXIDATIVE PHOSPHORYLATION	0.0	0.0	0.0	0.0	0.0	0.0	0.0	0.0	0.0	0.0	0.0	0.0	0.0	0.0	0.0	0.0	1.0	0.0	0.0	0.0
SCRN1	9805	symbol	H. sapiens	9805	H. sapiens	SCRN1	secernin 1	GO:0006887 exocytosis;GO:0032940 secretion by cell;GO:0140352 export from cell		Predicted intracellular proteins; Enzymes; Peptidases:Cysteine-type peptidases	Cytosol (Approved)			(M5910)HALLMARK PROTEIN SECRETION	0.0	0.0	0.0	0.0	0.0	0.0	0.0	0.0	0.0	0.0	0.0	0.0	0.0	0.0	0.0	0.0	0.0	0.0	0.0	0.0
UIMC1	51720	symbol	H. sapiens	51720	H. sapiens	UIMC1	ubiquitin interaction motif containing 1	GO:0070537 histone H2A K63-linked deubiquitination;GO:0016578 histone deubiquitination;GO:0007095 mitotic G2 DNA damage checkpoint signaling		Predicted intracellular proteins	Nuclear bodies (Supported); Additional: Nucleoplasm		(M84)PID ATM PATHWAY		0.0	1.0	0.0	1.0	0.0	1.0	0.0	0.0	0.0	0.0	0.0	0.0	0.0	1.0	0.0	0.0	0.0	0.0	0.0	0.0
UBR7	55148	symbol	H. sapiens	55148	H. sapiens	UBR7	ubiquitin protein ligase E3 component n-recognin 7	GO:0016567 protein ubiquitination;GO:0032446 protein modification by small protein conjugation;GO:0070647 protein modification by small protein conjugation or removal		Predicted intracellular proteins; Enzymes; ENZYME proteins:Transferases	Nucleoplasm (Approved)			(M5925)HALLMARK E2F TARGETS	0.0	0.0	0.0	0.0	0.0	0.0	0.0	0.0	0.0	0.0	0.0	0.0	0.0	0.0	0.0	0.0	0.0	0.0	0.0	0.0
PKN2	5586	symbol	H. sapiens	5586	H. sapiens	PKN2	protein kinase N2	GO:0045070 positive regulation of viral genome replication;GO:0032467 positive regulation of cytokinesis;GO:0048524 positive regulation of viral process	AGC Ser/Thr protein kinase family	Kinases:AGC Ser/Thr protein kinases; Predicted intracellular proteins; Enzymes; ENZYME proteins:Transferases	Intermediate filaments;Nucleoplasm (Supported); Additional: Centrosome;Cytosol;Nuclear bodies;Plasma membrane	Fostamatinib	(M12)PID RHOA PATHWAY		0.0	0.0	0.0	1.0	0.0	0.0	0.0	0.0	0.0	0.0	0.0	0.0	0.0	0.0	0.0	0.0	0.0	0.0	0.0	0.0
ACSL5	51703	symbol	H. sapiens	51703	H. sapiens	ACSL5	acyl-CoA synthetase long chain family member 5	GO:0010747 positive regulation of long-chain fatty acid import across plasma membrane;GO:0140214 positive regulation of long-chain fatty acid import into cell;GO:0010746 regulation of long-chain fatty acid import across plasma membrane		ENZYME proteins:Ligase; Enzymes	Mitochondria (Supported); Additional: Nucleoplasm			(M5949)HALLMARK PEROXISOME; (M5948)HALLMARK BILE ACID METABOLISM; (M5935)HALLMARK FATTY ACID METABOLISM	0.0	0.0	0.0	0.0	0.0	0.0	0.0	0.0	0.0	0.0	0.0	0.0	0.0	0.0	0.0	0.0	0.0	0.0	0.0	0.0
SETD2	29072	symbol	H. sapiens	29072	H. sapiens	SETD2	SET domain containing 2, histone lysine methyltransferase	GO:0035441 cell migration involved in vasculogenesis;GO:0097676 histone H3-K36 dimethylation;GO:0010793 regulation of mRNA export from nucleus		Disease related genes; ENZYME proteins:Transferases; Predicted intracellular proteins; Cancer-related genes:Mutational cancer driver genes; Potential drug targets; Cancer-related genes:Mutated cancer genes; Enzymes	Nuclear speckles (Approved); Additional: Cytosol				0.0	1.0	0.0	1.0	0.0	1.0	1.0	0.0	0.0	1.0	0.0	1.0	1.0	1.0	0.0	0.0	0.0	0.0	0.0	0.0
ESD	2098	symbol	H. sapiens	2098	H. sapiens	ESD	esterase D	GO:0046294 formaldehyde catabolic process;GO:0046292 formaldehyde metabolic process;GO:0110095 cellular detoxification of aldehyde		Predicted intracellular proteins; Enzymes; ENZYME proteins:Hydrolases	Golgi apparatus (Approved); Additional: Cytosol;Nucleoplasm	Glutathione			0.0	0.0	0.0	0.0	0.0	0.0	0.0	0.0	0.0	0.0	0.0	0.0	0.0	0.0	0.0	0.0	0.0	0.0	0.0	0.0
TRERF1	55809	symbol	H. sapiens	55809	H. sapiens	TRERF1	transcriptional regulating factor 1	GO:0071393 cellular response to progesterone stimulus;GO:0050847 progesterone receptor signaling pathway;GO:0032570 response to progesterone		Transcription factors:Zinc-coordinating DNA-binding domains; Predicted intracellular proteins; Transcription factors:Helix-turn-helix domains	Nucleoplasm (Enhanced); Additional: Cytosol;Nucleoli fibrillar center				0.0	0.0	0.0	0.0	0.0	1.0	0.0	0.0	0.0	0.0	0.0	0.0	0.0	0.0	0.0	0.0	0.0	0.0	0.0	0.0
MRE11A	4361	gene_synonym	H. sapiens	4361	H. sapiens	MRE11	MRE11 homolog, double strand break repair nuclease	GO:0097551 mitochondrial double-strand break repair;GO:0097552 mitochondrial double-strand break repair via homologous recombination;GO:0110025 DNA strand resection involved in replication fork processing		Predicted intracellular proteins; Disease related genes; Cancer-related genes:Candidate cancer biomarkers	Nucleoplasm (Enhanced)		(M258)PID BARD1 PATHWAY; (M84)PID ATM PATHWAY; (M1)PID FANCONI PATHWAY	(M5925)HALLMARK E2F TARGETS	0.0	1.0	1.0	1.0	0.0	0.0	0.0	1.0	0.0	0.0	0.0	0.0	0.0	1.0	0.0	0.0	0.0	1.0	0.0	0.0
ASTN1	460	symbol	H. sapiens	460	H. sapiens	ASTN1	astrotactin 1	GO:0007158 neuron cell-cell adhesion;GO:0001764 neuron migration;GO:0007626 locomotory behavior		Transporters	Golgi apparatus;Vesicles (Approved)				0.0	0.0	0.0	0.0	0.0	0.0	0.0	0.0	0.0	0.0	0.0	0.0	0.0	0.0	0.0	0.0	0.0	0.0	0.0	0.0
HOXB-AS3	404266	symbol	H. sapiens	404266	H. sapiens	HOXB-AS3	HOXB cluster antisense RNA 3								0.0	0.0	0.0	0.0	0.0	0.0	0.0	0.0	0.0	0.0	0.0	0.0	0.0	0.0	0.0	0.0	0.0	0.0	0.0	0.0
CEP120	153241	symbol	H. sapiens	153241	H. sapiens	CEP120	centrosomal protein 120	GO:0010825 positive regulation of centrosome duplication;GO:1903724 positive regulation of centriole elongation;GO:0022027 interkinetic nuclear migration		Predicted intracellular proteins; Disease related genes	Microtubules (Approved); Additional: Cytosol				0.0	0.0	1.0	0.0	0.0	0.0	0.0	1.0	0.0	0.0	0.0	1.0	0.0	0.0	1.0	0.0	0.0	0.0	0.0	0.0
ATF7IP	55729	symbol	H. sapiens	55729	H. sapiens	ATF7IP	activating transcription factor 7 interacting protein	GO:0045898 regulation of RNA polymerase II transcription preinitiation complex assembly;GO:0090309 positive regulation of DNA methylation-dependent heterochromatin assembly;GO:0031453 positive regulation of heterochromatin assembly		Predicted intracellular proteins	Nuclear bodies;Nucleoplasm (Enhanced)				0.0	0.0	0.0	0.0	0.0	1.0	0.0	1.0	0.0	1.0	0.0	0.0	0.0	1.0	0.0	0.0	1.0	0.0	0.0	0.0
LZTFL1	54585	symbol	H. sapiens	54585	H. sapiens	LZTFL1	leucine zipper transcription factor like 1	GO:1903568 negative regulation of protein localization to ciliary membrane;GO:1903565 negative regulation of protein localization to cilium;GO:1903567 regulation of protein localization to ciliary membrane		Predicted intracellular proteins; Disease related genes	Cytosol (Supported)				0.0	0.0	1.0	0.0	0.0	0.0	1.0	0.0	0.0	0.0	0.0	0.0	0.0	0.0	0.0	0.0	0.0	0.0	0.0	0.0
SECISBP2	79048	symbol	H. sapiens	79048	H. sapiens	SECISBP2	SECIS binding protein 2	GO:2000622 regulation of nuclear-transcribed mRNA catabolic process, nonsense-mediated decay;GO:2000623 negative regulation of nuclear-transcribed mRNA catabolic process, nonsense-mediated decay;GO:0001514 selenocysteine incorporation		Predicted intracellular proteins; Disease related genes	Nucleoplasm (Supported)				1.0	0.0	0.0	0.0	1.0	0.0	0.0	0.0	1.0	0.0	0.0	0.0	0.0	0.0	0.0	0.0	0.0	0.0	0.0	0.0
ERCC3	2071	symbol	H. sapiens	2071	H. sapiens	ERCC3	ERCC excision repair 3, TFIIH core complex helicase subunit	GO:0000717 nucleotide-excision repair, DNA duplex unwinding;GO:0006362 transcription elongation from RNA polymerase I promoter;GO:0033683 nucleotide-excision repair, DNA incision		Disease related genes; Predicted intracellular proteins; Potential drug targets; ENZYME proteins:Hydrolases; Cancer-related genes:Candidate cancer biomarkers; Enzymes	Nucleoplasm (Enhanced)			(M5949)HALLMARK PEROXISOME; (M5898)HALLMARK DNA REPAIR	1.0	1.0	0.0	0.0	0.0	0.0	0.0	0.0	0.0	0.0	0.0	0.0	0.0	1.0	0.0	0.0	1.0	0.0	0.0	0.0
MMP3	4314	symbol	H. sapiens	4314	H. sapiens	MMP3	matrix metallopeptidase 3	GO:0010727 negative regulation of hydrogen peroxide metabolic process;GO:0071492 cellular response to UV-A;GO:0070141 response to UV-A		Disease related genes; Predicted intracellular proteins; Peptidases:Metallopeptidases; ENZYME proteins:Hydrolases; Cancer-related genes:Candidate cancer biomarkers; FDA approved drug targets:Small molecule drugs; Candidate cardiovascular disease genes; Predicted secreted proteins; Enzymes	Vesicles (Supported)	Marimastat; N-Hydroxy 1n(4-Methoxyphenyl)Sulfonyl-4-(Z,E-N-Methoxyimino)Pyrrolidine-2r-Carboxamide; 3-Methylpyridine; A Disubstituted Succinyl Caprolactam Hydroxymate Mmp3inhibitor; N-Hydroxy-4-[(4-Methoxylphenyl)Sulfonyl]-2,2-Dimethyl-Hexahydro-1,4-Thiazepine-3(S)-Carboxamide; (1n)-4-N-Butoxyphenylsulfonyl-(2r)-N-Hydroxycarboxamido-(4s)-Methanesulfonylamino-Pyrrolidine; 3-(1h-Indol-3-Yl)-2-[4-(4…	(M174)PID UPA UPAR PATHWAY; (M142)PID AJDISS 2PATHWAY; (M153)PID P75 NTR PATHWAY	(M5946)HALLMARK COAGULATION; (M5930)HALLMARK EPITHELIAL MESENCHYMAL TRANSITION	0.0	0.0	0.0	0.0	0.0	0.0	0.0	0.0	0.0	0.0	0.0	0.0	0.0	0.0	0.0	0.0	0.0	0.0	0.0	1.0
SNX16	64089	symbol	H. sapiens	64089	H. sapiens	SNX16	sorting nexin 16	GO:0006622 protein targeting to lysosome;GO:0006623 protein targeting to vacuole;GO:0045022 early endosome to late endosome transport		Predicted intracellular proteins	Vesicles (Supported)				0.0	0.0	0.0	0.0	0.0	0.0	1.0	0.0	0.0	0.0	0.0	0.0	0.0	0.0	0.0	0.0	0.0	0.0	0.0	0.0
TDP1	55775	symbol	H. sapiens	55775	H. sapiens	TDP1	tyrosyl-DNA phosphodiesterase 1	GO:0000012 single strand break repair;GO:0006302 double-strand break repair;GO:0090305 nucleic acid phosphodiester bond hydrolysis		Predicted intracellular proteins; Disease related genes	Nucleoplasm (Supported); Additional: Plasma membrane				0.0	1.0	0.0	0.0	0.0	0.0	0.0	0.0	0.0	0.0	0.0	0.0	0.0	1.0	0.0	0.0	0.0	0.0	0.0	0.0
LRRC39	127495	symbol	H. sapiens	127495	H. sapiens	LRRC39	leucine rich repeat containing 39	GO:0006470 protein dephosphorylation;GO:0016311 dephosphorylation;GO:0006796 phosphate-containing compound metabolic process		Predicted intracellular proteins					0.0	0.0	0.0	0.0	0.0	0.0	0.0	0.0	0.0	0.0	0.0	0.0	0.0	0.0	0.0	0.0	0.0	0.0	0.0	0.0
RFX7	64864	symbol	H. sapiens	64864	H. sapiens	RFX7	regulatory factor X7	GO:0006357 regulation of transcription by RNA polymerase II;GO:0006366 transcription by RNA polymerase II;GO:0006355 regulation of transcription, DNA-templated		Predicted intracellular proteins; Transcription factors:Helix-turn-helix domains	Nuclear membrane;Nucleoplasm (Approved)				0.0	0.0	0.0	0.0	0.0	0.0	0.0	0.0	0.0	0.0	0.0	0.0	0.0	0.0	0.0	0.0	0.0	0.0	0.0	0.0
RAE1	8480	symbol	H. sapiens	8480	H. sapiens	RAE1	ribonucleic acid export 1	GO:0000972 transcription-dependent tethering of RNA polymerase II gene DNA at nuclear periphery;GO:0060236 regulation of mitotic spindle organization;GO:0090224 regulation of spindle organization		Predicted intracellular proteins; Transporters:Transporter channels and pores	Nucleoli fibrillar center;Nucleoplasm (Supported)			(M5898)HALLMARK DNA REPAIR	1.0	0.0	0.0	1.0	0.0	0.0	1.0	0.0	0.0	0.0	0.0	1.0	1.0	0.0	0.0	0.0	0.0	0.0	0.0	1.0
COPG2	26958	symbol	H. sapiens	26958	H. sapiens	COPG2	COPI coat complex subunit gamma 2	GO:0006891 intra-Golgi vesicle-mediated transport;GO:0006890 retrograde vesicle-mediated transport, Golgi to endoplasmic reticulum;GO:0072384 organelle transport along microtubule		Predicted intracellular proteins					0.0	0.0	0.0	0.0	0.0	0.0	0.0	0.0	0.0	0.0	0.0	0.0	0.0	0.0	0.0	0.0	0.0	0.0	0.0	0.0
SACM1L	22908	symbol	H. sapiens	22908	H. sapiens	SACM1L	SAC1 like phosphatidylinositide phosphatase	GO:0046856 phosphatidylinositol dephosphorylation;GO:0046839 phospholipid dephosphorylation;GO:0006661 phosphatidylinositol biosynthetic process		Predicted intracellular proteins	Golgi apparatus;Nucleoplasm (Approved)				0.0	0.0	0.0	0.0	0.0	0.0	0.0	0.0	0.0	0.0	0.0	0.0	0.0	0.0	0.0	0.0	0.0	0.0	0.0	0.0
PLBD1	79887	symbol	H. sapiens	79887	H. sapiens	PLBD1	phospholipase B domain containing 1	GO:0009395 phospholipid catabolic process;GO:0046434 organophosphate catabolic process;GO:0044242 cellular lipid catabolic process		Predicted intracellular proteins					0.0	0.0	0.0	0.0	0.0	0.0	0.0	0.0	0.0	0.0	0.0	0.0	0.0	0.0	0.0	0.0	0.0	0.0	0.0	0.0
EIF2A	83939	symbol	H. sapiens	83939	H. sapiens	EIF2A	eukaryotic translation initiation factor 2A	GO:0032933 SREBP signaling pathway;GO:0071501 cellular response to sterol depletion;GO:0006991 response to sterol depletion		Predicted intracellular proteins	Cytosol;Mitochondria (Approved)		(M286)PID TGFBR PATHWAY		0.0	0.0	0.0	0.0	0.0	0.0	0.0	0.0	1.0	0.0	0.0	0.0	0.0	0.0	1.0	0.0	0.0	0.0	0.0	0.0
ZNF675	171392	symbol	H. sapiens	171392	H. sapiens	ZNF675	zinc finger protein 675	GO:2000660 negative regulation of interleukin-1-mediated signaling pathway;GO:2000659 regulation of interleukin-1-mediated signaling pathway;GO:0043508 negative regulation of JUN kinase activity		Transcription factors:Zinc-coordinating DNA-binding domains; Predicted intracellular proteins					0.0	0.0	0.0	0.0	0.0	0.0	0.0	0.0	0.0	0.0	0.0	0.0	0.0	0.0	0.0	0.0	0.0	0.0	0.0	0.0
HDAC3	8841	symbol	H. sapiens	8841	H. sapiens	HDAC3	histone deacetylase 3	GO:0070933 histone H4 deacetylation;GO:0010832 negative regulation of myotube differentiation;GO:0070932 histone H3 deacetylation		FDA approved drug targets:Small molecule drugs; Predicted intracellular proteins; Enzymes; ENZYME proteins:Hydrolases	Nucleoplasm (Supported); Additional: Golgi apparatus	Vorinostat; Pracinostat; Mocetinostat	(M207)PID RETINOIC ACID PATHWAY; (M30)PID HDAC CLASSII PATHWAY; (M254)PID MYC REPRESS PATHWAY	(M5939)HALLMARK P53 PATHWAY	0.0	0.0	1.0	0.0	0.0	1.0	1.0	0.0	0.0	0.0	0.0	1.0	0.0	0.0	1.0	0.0	1.0	0.0	1.0	0.0
THUMPD3	25917	symbol	H. sapiens	25917	H. sapiens	THUMPD3	THUMP domain containing 3	GO:0030488 tRNA methylation;GO:0001510 RNA methylation;GO:0006400 tRNA modification		Predicted intracellular proteins	Cytosol (Enhanced); Additional: Nucleoli				0.0	0.0	0.0	0.0	0.0	0.0	0.0	0.0	0.0	1.0	0.0	0.0	0.0	0.0	0.0	0.0	0.0	0.0	0.0	0.0
LUC7L3	51747	symbol	H. sapiens	51747	H. sapiens	LUC7L3	LUC7 like 3 pre-mRNA splicing factor	GO:0006376 mRNA splice site selection;GO:0000245 spliceosomal complex assembly;GO:0022618 ribonucleoprotein complex assembly		Predicted intracellular proteins	Nuclear speckles (Enhanced)			(M5925)HALLMARK E2F TARGETS	1.0	0.0	0.0	0.0	0.0	0.0	0.0	0.0	0.0	0.0	0.0	0.0	0.0	0.0	0.0	0.0	0.0	0.0	0.0	0.0
RPAP3	79657	symbol	H. sapiens	79657	H. sapiens	RPAP3	RNA polymerase II associated protein 3			Predicted intracellular proteins	Cytosol (Enhanced)				0.0	0.0	0.0	0.0	0.0	0.0	0.0	0.0	0.0	0.0	0.0	0.0	0.0	0.0	0.0	0.0	0.0	0.0	0.0	0.0
THOC7	80145	symbol	H. sapiens	80145	H. sapiens	THOC7	THO complex 7	GO:0046784 viral mRNA export from host cell nucleus;GO:0044417 translocation of molecules into host;GO:0006406 mRNA export from nucleus		Predicted intracellular proteins	Cytosol;Nuclear speckles (Supported)				1.0	0.0	0.0	0.0	0.0	0.0	1.0	0.0	0.0	0.0	0.0	0.0	1.0	0.0	0.0	0.0	0.0	0.0	0.0	0.0
SUPT3H	8464	symbol	H. sapiens	8464	H. sapiens	SUPT3H	SPT3 homolog, SAGA and STAGA complex component	GO:0016578 histone deubiquitination;GO:0043966 histone H3 acetylation;GO:0016579 protein deubiquitination		Predicted intracellular proteins	Nucleoplasm (Supported)		(M139)PID MYC PATHWAY; (M66)PID MYC ACTIV PATHWAY		0.0	0.0	0.0	0.0	0.0	1.0	0.0	0.0	0.0	0.0	0.0	0.0	0.0	0.0	0.0	0.0	0.0	0.0	0.0	0.0
PPIL3	53938	symbol	H. sapiens	53938	H. sapiens	PPIL3	peptidylprolyl isomerase like 3	GO:0000413 protein peptidyl-prolyl isomerization;GO:0018208 peptidyl-proline modification;GO:0006457 protein folding		Predicted intracellular proteins; ENZYME proteins:Isomerase; Enzymes	Nucleoplasm (Approved); Additional: Nucleoli				1.0	0.0	0.0	0.0	0.0	0.0	0.0	0.0	0.0	0.0	0.0	0.0	0.0	0.0	0.0	0.0	0.0	0.0	0.0	0.0
MNS1	55329	symbol	H. sapiens	55329	H. sapiens	MNS1	meiosis specific nuclear structural 1	GO:0070986 left/right axis specification;GO:0060972 left/right pattern formation;GO:0045724 positive regulation of cilium assembly		Predicted intracellular proteins	Nuclear speckles;Nucleoplasm (Approved)				0.0	0.0	1.0	0.0	0.0	0.0	0.0	1.0	0.0	0.0	0.0	1.0	0.0	0.0	1.0	1.0	0.0	0.0	0.0	0.0
ZSCAN9	7746	symbol	H. sapiens	7746	H. sapiens	ZSCAN9	zinc finger and SCAN domain containing 9	GO:0006357 regulation of transcription by RNA polymerase II;GO:0006366 transcription by RNA polymerase II;GO:0006355 regulation of transcription, DNA-templated		Transcription factors:Zinc-coordinating DNA-binding domains; Predicted intracellular proteins	Nucleoplasm (Approved)				0.0	0.0	0.0	0.0	0.0	0.0	0.0	0.0	0.0	0.0	0.0	0.0	0.0	0.0	0.0	0.0	0.0	0.0	0.0	0.0
C5orf42	65250	gene_synonym	H. sapiens	65250	H. sapiens	CPLANE1	ciliogenesis and planar polarity effector 1	GO:0060271 cilium assembly;GO:0044782 cilium organization;GO:0120031 plasma membrane bounded cell projection assembly		Predicted intracellular proteins; Disease related genes	Cytosol (Approved)				0.0	0.0	1.0	0.0	0.0	0.0	0.0	0.0	0.0	0.0	0.0	0.0	0.0	0.0	0.0	0.0	0.0	0.0	0.0	0.0
UBXN7	26043	symbol	H. sapiens	26043	H. sapiens	UBXN7	UBX domain protein 7			Predicted intracellular proteins	Nucleoplasm (Enhanced)				0.0	0.0	0.0	0.0	0.0	0.0	0.0	0.0	0.0	0.0	0.0	0.0	0.0	0.0	0.0	0.0	0.0	0.0	0.0	0.0
ZNF521	25925	symbol	H. sapiens	25925	H. sapiens	ZNF521	zinc finger protein 521	GO:0048663 neuron fate commitment;GO:0045165 cell fate commitment;GO:0045944 positive regulation of transcription by RNA polymerase II		Transcription factors:Zinc-coordinating DNA-binding domains; Predicted intracellular proteins; Disease related genes; Cancer-related genes	Nucleoplasm (Approved)				0.0	0.0	0.0	0.0	0.0	0.0	0.0	0.0	0.0	0.0	0.0	0.0	0.0	0.0	0.0	0.0	0.0	0.0	0.0	0.0
GALNT15	117248	symbol	H. sapiens	117248	H. sapiens	GALNT15	polypeptide N-acetylgalactosaminyltransferase 15	GO:0016266 O-glycan processing;GO:0006493 protein O-linked glycosylation;GO:0006486 protein glycosylation		Predicted intracellular proteins; Enzymes; ENZYME proteins:Transferases	Golgi apparatus (Approved); Additional: Cytosol				0.0	0.0	0.0	0.0	0.0	0.0	0.0	0.0	0.0	0.0	0.0	0.0	0.0	0.0	0.0	0.0	0.0	0.0	0.0	0.0
TC2N	123036	symbol	H. sapiens	123036	H. sapiens	TC2N	tandem C2 domains, nuclear			Predicted intracellular proteins	Nuclear bodies;Nucleoplasm (Approved)				0.0	0.0	0.0	0.0	0.0	0.0	0.0	0.0	0.0	0.0	0.0	0.0	0.0	0.0	0.0	0.0	0.0	0.0	0.0	0.0
GXYLT1	283464	symbol	H. sapiens	283464	H. sapiens	GXYLT1	glucoside xylosyltransferase 1	GO:0016266 O-glycan processing;GO:0006493 protein O-linked glycosylation;GO:0006486 protein glycosylation		Predicted intracellular proteins; Enzymes; ENZYME proteins:Transferases					0.0	0.0	0.0	0.0	0.0	0.0	0.0	0.0	0.0	0.0	0.0	0.0	0.0	0.0	0.0	0.0	0.0	0.0	0.0	0.0
WASF1	8936	symbol	H. sapiens	8936	H. sapiens	WASF1	WASP family member 1	GO:0098939 dendritic transport of mitochondrion;GO:0051388 positive regulation of neurotrophin TRK receptor signaling pathway;GO:0098885 modification of postsynaptic actin cytoskeleton		Predicted intracellular proteins			(M16801)SIG REGULATION OF THE ACTIN CYTOSKELETON BY RHO GTPASES; (M5193)SIG CHEMOTAXIS; (M278)PID RAC1 PATHWAY	(M5893)HALLMARK MITOTIC SPINDLE	0.0	0.0	0.0	0.0	0.0	0.0	0.0	1.0	0.0	0.0	0.0	0.0	0.0	0.0	0.0	0.0	0.0	0.0	1.0	1.0
KCTD3	51133	symbol	H. sapiens	51133	H. sapiens	KCTD3	potassium channel tetramerization domain containing 3	GO:0051260 protein homooligomerization;GO:0051259 protein complex oligomerization;GO:0065003 protein-containing complex assembly		Predicted intracellular proteins	Cytosol (Approved)				0.0	0.0	0.0	0.0	0.0	0.0	0.0	0.0	0.0	0.0	0.0	0.0	0.0	0.0	0.0	0.0	0.0	0.0	0.0	0.0
TTC21A	199223	symbol	H. sapiens	199223	H. sapiens	TTC21A	tetratricopeptide repeat domain 21A	GO:0035721 intraciliary retrograde transport;GO:0042073 intraciliary transport;GO:0061512 protein localization to cilium		Predicted intracellular proteins	Nucleoplasm (Approved)				0.0	0.0	1.0	0.0	0.0	0.0	0.0	0.0	0.0	0.0	0.0	0.0	1.0	0.0	0.0	1.0	0.0	0.0	0.0	0.0
C17orf85	55421	gene_synonym	H. sapiens	55421	H. sapiens	NCBP3	nuclear cap binding subunit 3	GO:0006370 7-methylguanosine mRNA capping;GO:0009452 7-methylguanosine RNA capping;GO:0036260 RNA capping		Predicted intracellular proteins	Nuclear speckles (Approved)				1.0	0.0	0.0	0.0	0.0	0.0	0.0	0.0	0.0	0.0	0.0	0.0	1.0	0.0	0.0	0.0	0.0	0.0	0.0	0.0
ARG2	384	symbol	H. sapiens	384	H. sapiens	ARG2	arginase 2	GO:0071606 chemokine (C-C motif) ligand 4 production;GO:0071643 regulation of chemokine (C-C motif) ligand 4 production;GO:0071644 negative regulation of chemokine (C-C motif) ligand 4 production		Enzymes; Predicted intracellular proteins; ENZYME proteins:Hydrolases; Cancer-related genes:Candidate cancer biomarkers	Mitochondria (Supported)	Arginine; Ornithine; S-2-(Boronoethyl)-L-Cysteine		(M5934)HALLMARK XENOBIOTIC METABOLISM	0.0	0.0	0.0	0.0	0.0	0.0	0.0	0.0	0.0	0.0	0.0	0.0	0.0	0.0	0.0	0.0	0.0	0.0	0.0	1.0
HLA-J	3137	symbol	H. sapiens	3137	H. sapiens	HLA-J	major histocompatibility complex, class I, J (pseudogene)								0.0	0.0	0.0	0.0	0.0	0.0	0.0	0.0	0.0	0.0	0.0	0.0	0.0	0.0	0.0	0.0	0.0	0.0	0.0	0.0
SLC29A3	55315	symbol	H. sapiens	55315	H. sapiens	SLC29A3	solute carrier family 29 member 3	GO:1901642 nucleoside transmembrane transport;GO:0015858 nucleoside transport;GO:1901264 carbohydrate derivative transport		Potential drug targets; Disease related genes; Transporters:Electrochemical Potential-driven transporters	Golgi apparatus;Vesicles (Enhanced)			(M5956)HALLMARK KRAS SIGNALING DN	0.0	0.0	0.0	0.0	0.0	0.0	0.0	0.0	0.0	0.0	0.0	0.0	1.0	0.0	0.0	0.0	0.0	0.0	0.0	0.0
ZNF146	7705	symbol	H. sapiens	7705	H. sapiens	ZNF146	zinc finger protein 146	GO:0006357 regulation of transcription by RNA polymerase II;GO:0006366 transcription by RNA polymerase II;GO:0006355 regulation of transcription, DNA-templated		Transcription factors:Zinc-coordinating DNA-binding domains; Predicted intracellular proteins	Nucleoli (Supported)				0.0	0.0	0.0	0.0	0.0	0.0	0.0	0.0	0.0	0.0	0.0	0.0	0.0	0.0	0.0	0.0	0.0	0.0	0.0	0.0
ZNF558	148156	symbol	H. sapiens	148156	H. sapiens	ZNF558	zinc finger protein 558	GO:0000122 negative regulation of transcription by RNA polymerase II;GO:0045892 negative regulation of transcription, DNA-templated;GO:1903507 negative regulation of nucleic acid-templated transcription		Transcription factors:Zinc-coordinating DNA-binding domains; Predicted intracellular proteins					0.0	0.0	0.0	0.0	0.0	0.0	0.0	0.0	0.0	0.0	0.0	0.0	0.0	0.0	0.0	0.0	0.0	0.0	0.0	0.0
ICE2	79664	symbol	H. sapiens	79664	H. sapiens	ICE2	interactor of little elongation complex ELL subunit 2	GO:0042796 snRNA transcription by RNA polymerase III;GO:0045945 positive regulation of transcription by RNA polymerase III;GO:0042795 snRNA transcription by RNA polymerase II		Predicted intracellular proteins	Nuclear bodies;Nucleoplasm (Supported)				0.0	0.0	0.0	0.0	0.0	0.0	0.0	0.0	0.0	0.0	0.0	0.0	0.0	0.0	0.0	0.0	0.0	0.0	0.0	0.0
LOC100506639	100506639	Gene_ID	H. sapiens	100506639	H. sapiens	LOC100506639	uncharacterized LOC100506639								0.0	0.0	0.0	0.0	0.0	0.0	0.0	0.0	0.0	0.0	0.0	0.0	0.0	0.0	0.0	0.0	0.0	0.0	0.0	0.0
GOLPH3L	55204	symbol	H. sapiens	55204	H. sapiens	GOLPH3L	golgi phosphoprotein 3 like	GO:0048194 Golgi vesicle budding;GO:0043001 Golgi to plasma membrane protein transport;GO:0006890 retrograde vesicle-mediated transport, Golgi to endoplasmic reticulum		Predicted intracellular proteins	Golgi apparatus (Supported); Additional: Cytosol				0.0	0.0	0.0	0.0	0.0	0.0	0.0	0.0	0.0	0.0	0.0	0.0	0.0	0.0	0.0	0.0	0.0	0.0	0.0	0.0
SMC4	10051	symbol	H. sapiens	10051	H. sapiens	SMC4	structural maintenance of chromosomes 4	GO:0010032 meiotic chromosome condensation;GO:0007076 mitotic chromosome condensation;GO:0051383 kinetochore organization		Predicted intracellular proteins	Cytosol;Nuclear speckles (Supported)		(M14)PID AURORA B PATHWAY	(M5893)HALLMARK MITOTIC SPINDLE; (M5901)HALLMARK G2M CHECKPOINT; (M5925)HALLMARK E2F TARGETS	0.0	0.0	0.0	1.0	0.0	0.0	0.0	0.0	0.0	0.0	0.0	0.0	0.0	1.0	0.0	0.0	0.0	1.0	0.0	0.0
ALDOC	230	symbol	H. sapiens	230	H. sapiens	ALDOC	aldolase, fructose-bisphosphate C	GO:0030388 fructose 1,6-bisphosphate metabolic process;GO:0006000 fructose metabolic process;GO:0006096 glycolytic process		ENZYME proteins:Lyases; Predicted intracellular proteins; Cancer-related genes:Candidate cancer biomarkers; Candidate cardiovascular disease genes; Enzymes	Nucleoli fibrillar center;Nucleoplasm (Approved); Additional: Cytosol;Vesicles			(M5892)HALLMARK CHOLESTEROL HOMEOSTASIS; (M5891)HALLMARK HYPOXIA	0.0	0.0	0.0	0.0	0.0	0.0	0.0	0.0	0.0	0.0	0.0	0.0	0.0	0.0	0.0	0.0	0.0	0.0	0.0	0.0
RAB14	51552	symbol	H. sapiens	51552	H. sapiens	RAB14	RAB14, member RAS oncogene family	GO:0090386 phagosome maturation involved in apoptotic cell clearance;GO:0090387 phagolysosome assembly involved in apoptotic cell clearance;GO:0001845 phagolysosome assembly		Predicted intracellular proteins	Vesicles (Supported)			(M5910)HALLMARK PROTEIN SECRETION	0.0	0.0	0.0	0.0	0.0	0.0	0.0	0.0	0.0	0.0	0.0	0.0	0.0	0.0	0.0	0.0	0.0	0.0	0.0	0.0
LINC01094	100505702	symbol	H. sapiens	100505702	H. sapiens	LINC01094	long intergenic non-protein coding RNA 1094								0.0	0.0	0.0	0.0	0.0	0.0	0.0	0.0	0.0	0.0	0.0	0.0	0.0	0.0	0.0	0.0	0.0	0.0	0.0	0.0
KIAA1841	84542	gene_synonym	H. sapiens	84542	H. sapiens	SANBR	SANT and BTB domain regulator of CSR			Predicted intracellular proteins	Nucleoli;Nucleoplasm (Approved)				0.0	0.0	0.0	0.0	0.0	0.0	0.0	0.0	0.0	0.0	0.0	0.0	0.0	0.0	0.0	0.0	0.0	0.0	0.0	0.0
QPRT	23475	symbol	H. sapiens	23475	H. sapiens	QPRT	quinolinate phosphoribosyltransferase	GO:0034213 quinolinate catabolic process;GO:0046874 quinolinate metabolic process;GO:0072526 pyridine-containing compound catabolic process		FDA approved drug targets:Small molecule drugs; Predicted intracellular proteins; Enzymes; ENZYME proteins:Transferases	Vesicles (Approved)	Niacin			0.0	0.0	0.0	0.0	0.0	0.0	0.0	0.0	1.0	0.0	0.0	0.0	0.0	0.0	0.0	0.0	0.0	0.0	0.0	0.0
ATP2A3	489	symbol	H. sapiens	489	H. sapiens	ATP2A3	ATPase sarcoplasmic/endoplasmic reticulum Ca2+ transporting 3	GO:1903515 calcium ion transport from cytosol to endoplasmic reticulum;GO:0046967 cytosol to endoplasmic reticulum transport;GO:1900121 negative regulation of receptor binding		Enzymes; ENZYME proteins:Hydrolases					0.0	0.0	0.0	0.0	0.0	0.0	0.0	0.0	0.0	0.0	0.0	0.0	0.0	0.0	0.0	0.0	0.0	0.0	0.0	0.0
TBK1	29110	symbol	H. sapiens	29110	H. sapiens	TBK1	TANK binding kinase 1	GO:0044565 dendritic cell proliferation;GO:1904415 regulation of xenophagy;GO:1904417 positive regulation of xenophagy	Other	Disease related genes; ENZYME proteins:Transferases; Predicted intracellular proteins; RAS pathway related proteins; Potential drug targets; Enzymes; Kinases	Nucleoplasm (Enhanced); Additional: Vesicles	Fostamatinib		(M5923)HALLMARK PI3K AKT MTOR SIGNALING; (M5924)HALLMARK MTORC1 SIGNALING	0.0	0.0	0.0	0.0	0.0	0.0	0.0	0.0	1.0	0.0	0.0	0.0	0.0	0.0	0.0	0.0	0.0	0.0	0.0	1.0
ZNF214	7761	symbol	H. sapiens	7761	H. sapiens	ZNF214	zinc finger protein 214	GO:0006357 regulation of transcription by RNA polymerase II;GO:0006366 transcription by RNA polymerase II;GO:0006355 regulation of transcription, DNA-templated		Transcription factors:Zinc-coordinating DNA-binding domains; Predicted intracellular proteins					0.0	0.0	0.0	0.0	0.0	0.0	0.0	0.0	0.0	0.0	0.0	0.0	0.0	0.0	0.0	0.0	0.0	0.0	0.0	0.0
CLPX	10845	symbol	H. sapiens	10845	H. sapiens	CLPX	caseinolytic mitochondrial matrix peptidase chaperone subunit X	GO:0010952 positive regulation of peptidase activity;GO:0006457 protein folding;GO:0046034 ATP metabolic process		Predicted intracellular proteins	Mitochondria (Supported); Additional: Cytosol;Nucleoplasm				0.0	0.0	0.0	0.0	0.0	0.0	0.0	0.0	0.0	0.0	1.0	0.0	0.0	0.0	0.0	0.0	0.0	0.0	0.0	0.0
BTN2A3P	54718	symbol	H. sapiens	54718	H. sapiens	BTN2A3P	butyrophilin subfamily 2 member A3, pseudogene	GO:0050852 T cell receptor signaling pathway;GO:0050851 antigen receptor-mediated signaling pathway;GO:0002429 immune response-activating cell surface receptor signaling pathway							0.0	0.0	0.0	0.0	0.0	0.0	0.0	0.0	0.0	0.0	0.0	0.0	0.0	0.0	0.0	0.0	0.0	0.0	0.0	0.0
KIAA0196	9897	gene_synonym	H. sapiens	9897	H. sapiens	WASHC5	WASH complex subunit 5	GO:0140285 endosome fission;GO:0040038 polar body extrusion after meiotic divisions;GO:0033206 meiotic cytokinesis		Predicted intracellular proteins; Disease related genes	Nucleoplasm (Enhanced)				0.0	0.0	0.0	1.0	0.0	0.0	0.0	1.0	0.0	0.0	0.0	1.0	1.0	0.0	1.0	1.0	0.0	1.0	0.0	0.0
ANKRD6	22881	symbol	H. sapiens	22881	H. sapiens	ANKRD6	ankyrin repeat domain 6	GO:2000096 positive regulation of Wnt signaling pathway, planar cell polarity pathway;GO:2000052 positive regulation of non-canonical Wnt signaling pathway;GO:2000095 regulation of Wnt signaling pathway, planar cell polarity pathway		Predicted intracellular proteins	Vesicles (Enhanced)				0.0	0.0	0.0	0.0	0.0	0.0	0.0	0.0	0.0	0.0	0.0	0.0	0.0	0.0	0.0	0.0	0.0	0.0	0.0	0.0
AHCYL1	10768	symbol	H. sapiens	10768	H. sapiens	AHCYL1	adenosylhomocysteinase like 1	GO:0033353 S-adenosylmethionine cycle;GO:1990456 mitochondrion-endoplasmic reticulum membrane tethering;GO:0042045 epithelial fluid transport		Predicted intracellular proteins	Cytosol (Supported)				1.0	0.0	0.0	0.0	1.0	0.0	1.0	0.0	0.0	0.0	0.0	0.0	1.0	0.0	0.0	0.0	0.0	0.0	1.0	0.0
GAD1	2571	symbol	H. sapiens	2571	H. sapiens	GAD1	glutamate decarboxylase 1	GO:0018352 protein-pyridoxal-5-phosphate linkage;GO:0006540 glutamate decarboxylation to succinate;GO:0009449 gamma-aminobutyric acid biosynthetic process		Disease related genes; ENZYME proteins:Lyases; Predicted intracellular proteins; Potential drug targets; Enzymes	Cytosol;Plasma membrane;Vesicles (Approved)	Pyridoxal phosphate; Glutamic acid		(M5951)HALLMARK SPERMATOGENESIS; (M5934)HALLMARK XENOBIOTIC METABOLISM	0.0	0.0	0.0	0.0	0.0	0.0	0.0	0.0	0.0	0.0	0.0	0.0	0.0	0.0	0.0	0.0	0.0	0.0	0.0	0.0
RBM5	10181	symbol	H. sapiens	10181	H. sapiens	RBM5	RNA binding motif protein 5	GO:0000381 regulation of alternative mRNA splicing, via spliceosome;GO:0000380 alternative mRNA splicing, via spliceosome;GO:0000245 spliceosomal complex assembly		Predicted intracellular proteins	Nucleoplasm (Enhanced)			(M5945)HALLMARK HEME METABOLISM	1.0	0.0	0.0	0.0	1.0	0.0	0.0	0.0	0.0	0.0	0.0	0.0	0.0	0.0	0.0	0.0	0.0	0.0	0.0	0.0
ID2-AS1	100506299	symbol	H. sapiens	100506299	H. sapiens	ID2-AS1	ID2 antisense RNA 1								0.0	0.0	0.0	0.0	0.0	0.0	0.0	0.0	0.0	0.0	0.0	0.0	0.0	0.0	0.0	0.0	0.0	0.0	0.0	0.0
FMO4	2329	symbol	H. sapiens	2329	H. sapiens	FMO4	flavin containing dimethylaniline monoxygenase 4	GO:0042178 xenobiotic catabolic process;GO:0006805 xenobiotic metabolic process;GO:0071466 cellular response to xenobiotic stimulus		ENZYME proteins:Oxidoreductases; Enzymes	Cytosol;Vesicles (Approved)				0.0	0.0	0.0	0.0	0.0	0.0	0.0	0.0	0.0	0.0	0.0	0.0	0.0	0.0	0.0	0.0	0.0	0.0	0.0	0.0
RTF1	23168	symbol	H. sapiens	23168	H. sapiens	RTF1	RTF1 homolog, Paf1/RNA polymerase II complex component	GO:0001711 endodermal cell fate commitment;GO:0080182 histone H3-K4 trimethylation;GO:0051571 positive regulation of histone H3-K4 methylation		Predicted intracellular proteins	Nucleoplasm (Approved); Additional: Cytosol				0.0	0.0	0.0	0.0	0.0	1.0	0.0	0.0	0.0	1.0	0.0	0.0	0.0	0.0	0.0	0.0	0.0	0.0	0.0	0.0
NEMF	9147	symbol	H. sapiens	9147	H. sapiens	NEMF	nuclear export mediator factor	GO:1990116 ribosome-associated ubiquitin-dependent protein catabolic process;GO:0072344 rescue of stalled ribosome;GO:0006414 translational elongation		Predicted intracellular proteins	Cytosol;Nucleoplasm (Approved); Additional: Nuclear bodies				0.0	0.0	0.0	0.0	0.0	0.0	1.0	0.0	1.0	0.0	1.0	0.0	1.0	0.0	0.0	0.0	0.0	0.0	0.0	0.0
IL20RB	53833	symbol	H. sapiens	53833	H. sapiens	IL20RB	interleukin 20 receptor subunit beta	GO:0001808 negative regulation of type IV hypersensitivity;GO:0002884 negative regulation of hypersensitivity;GO:0001807 regulation of type IV hypersensitivity			Vesicles (Approved); Additional: Cytosol				0.0	0.0	0.0	0.0	0.0	0.0	0.0	0.0	0.0	0.0	0.0	0.0	0.0	0.0	0.0	0.0	0.0	0.0	0.0	1.0
MCMBP	79892	symbol	H. sapiens	79892	H. sapiens	MCMBP	minichromosome maintenance complex binding protein	GO:0007062 sister chromatid cohesion;GO:0006261 DNA-dependent DNA replication;GO:0000819 sister chromatid segregation		Predicted intracellular proteins	Nucleoplasm (Enhanced); Additional: Cell Junctions;Cytosol				0.0	0.0	0.0	1.0	0.0	0.0	0.0	0.0	0.0	0.0	0.0	0.0	0.0	0.0	0.0	0.0	0.0	1.0	0.0	0.0
PARP15	165631	symbol	H. sapiens	165631	H. sapiens	PARP15	poly(ADP-ribose) polymerase family member 15	GO:0070212 protein poly-ADP-ribosylation;GO:0140289 protein mono-ADP-ribosylation;GO:0006471 protein ADP-ribosylation		Predicted intracellular proteins; Enzymes; ENZYME proteins:Transferases	Mitochondria (Approved)	N~2~,N~2~-DIMETHYL-N~1~-(6-OXO-5,6-DIHYDROPHENANTHRIDIN-2-YL)GLYCINAMIDE			0.0	0.0	0.0	0.0	0.0	0.0	0.0	0.0	0.0	0.0	0.0	0.0	0.0	0.0	0.0	0.0	0.0	0.0	0.0	0.0
IGSF3	3321	symbol	H. sapiens	3321	H. sapiens	IGSF3	immunoglobulin superfamily member 3	GO:0032808 lacrimal gland development;GO:0035272 exocrine system development;GO:0048732 gland development		Predicted intracellular proteins; Disease related genes	Nucleoplasm (Approved); Additional: Cytosol			(M5945)HALLMARK HEME METABOLISM	0.0	0.0	0.0	0.0	0.0	0.0	0.0	0.0	0.0	0.0	0.0	0.0	0.0	0.0	0.0	0.0	0.0	0.0	0.0	0.0
FAM214A	56204	symbol	H. sapiens	56204	H. sapiens	FAM214A	family with sequence similarity 214 member A			Predicted intracellular proteins	Nucleoplasm (Approved)				0.0	0.0	0.0	0.0	0.0	0.0	0.0	0.0	0.0	0.0	0.0	0.0	0.0	0.0	0.0	0.0	0.0	0.0	0.0	0.0
ALG8	79053	symbol	H. sapiens	79053	H. sapiens	ALG8	ALG8 alpha-1,3-glucosyltransferase	GO:0006488 dolichol-linked oligosaccharide biosynthetic process;GO:0006490 oligosaccharide-lipid intermediate biosynthetic process;GO:0018279 protein N-linked glycosylation via asparagine		Potential drug targets; Disease related genes; Enzymes; ENZYME proteins:Transferases	Nucleoplasm (Approved)				0.0	0.0	0.0	0.0	0.0	0.0	0.0	0.0	0.0	0.0	0.0	0.0	0.0	0.0	0.0	0.0	0.0	0.0	0.0	0.0
TBX18	9096	symbol	H. sapiens	9096	H. sapiens	TBX18	T-box transcription factor 18	GO:0060823 canonical Wnt signaling pathway involved in neural plate anterior/posterior pattern formation;GO:0060827 regulation of canonical Wnt signaling pathway involved in neural plate anterior/posterior pattern formation;GO:0060829 negative regulation of canonical Wnt signaling pathway involved in neural plate anterior/posterior pattern formation		Predicted intracellular proteins; Disease related genes; Transcription factors:Immunoglobulin fold	Nucleoplasm (Supported)				0.0	0.0	0.0	0.0	0.0	0.0	0.0	0.0	0.0	0.0	0.0	0.0	0.0	0.0	0.0	0.0	0.0	0.0	0.0	0.0
GLB1L	79411	symbol	H. sapiens	79411	H. sapiens	GLB1L	galactosidase beta 1 like	GO:0005975 carbohydrate metabolic process;GO:0044238 primary metabolic process;GO:0071704 organic substance metabolic process		Predicted intracellular proteins; Predicted secreted proteins					0.0	0.0	0.0	0.0	0.0	0.0	0.0	0.0	0.0	0.0	0.0	0.0	0.0	0.0	0.0	0.0	0.0	0.0	0.0	0.0
MIR100HG	399959	symbol	H. sapiens	399959	H. sapiens	MIR100HG	mir-100-let-7a-2-mir-125b-1 cluster host gene								0.0	0.0	0.0	0.0	0.0	0.0	0.0	0.0	0.0	0.0	0.0	0.0	0.0	0.0	0.0	0.0	0.0	0.0	0.0	0.0
APP	351	symbol	H. sapiens	351	H. sapiens	APP	amyloid beta precursor protein	GO:0071874 cellular response to norepinephrine stimulus;GO:0051563 smooth endoplasmic reticulum calcium ion homeostasis;GO:0071873 response to norepinephrine		FDA approved drug targets:Small molecule drugs; Predicted intracellular proteins; Disease related genes; Transporters:Transporter channels and pores	Golgi apparatus (Approved); Additional: Vesicles	Deferoxamine; Aluminium; Zinc; L-methionine (R)-S-oxide; Resveratrol; Tromethamine; Phenserine; Tetrathiomolybdate; CAD106; Mito-4509; Edonerpic; Dimercaprol; Copper; Florbetaben (18F); Florbetapir (18F); Flutemetamol (18F); Zinc acetate; Aluminium phosphate; Aluminum acetate; Zinc chloride; Zinc sulfate, unspecified form	(M33)PID GLYPICAN 1PATHWAY; (M220)PID CASPASE PATHWAY; (M153)PID P75 NTR PATHWAY	(M5944)HALLMARK ANGIOGENESIS; (M5916)HALLMARK APICAL SURFACE; (M5902)HALLMARK APOPTOSIS	1.0	0.0	0.0	0.0	1.0	0.0	0.0	0.0	1.0	0.0	0.0	0.0	0.0	0.0	0.0	0.0	0.0	0.0	0.0	1.0
PRR3	80742	symbol	H. sapiens	80742	H. sapiens	PRR3	proline rich 3			Predicted intracellular proteins	Nucleoplasm (Approved); Additional: Cytosol				0.0	0.0	0.0	0.0	0.0	0.0	0.0	0.0	0.0	0.0	0.0	0.0	0.0	0.0	0.0	0.0	0.0	0.0	0.0	0.0
FLJ37201	283011	symbol	H. sapiens	283011	H. sapiens	FLJ37201	tigger transposable element derived 2 pseudogene								0.0	0.0	0.0	0.0	0.0	0.0	0.0	0.0	0.0	0.0	0.0	0.0	0.0	0.0	0.0	0.0	0.0	0.0	0.0	0.0
CUL2	8453	symbol	H. sapiens	8453	H. sapiens	CUL2	cullin 2	GO:0031146 SCF-dependent proteasomal ubiquitin-dependent protein catabolic process;GO:0000082 G1/S transition of mitotic cell cycle;GO:0044843 cell cycle G1/S phase transition		Predicted intracellular proteins; Cancer-related genes:Candidate cancer biomarkers	Nucleoplasm (Enhanced)		(M180)PID HIF1A PATHWAY		0.0	0.0	0.0	0.0	0.0	0.0	0.0	0.0	0.0	0.0	1.0	0.0	0.0	0.0	0.0	0.0	0.0	0.0	0.0	0.0
ZNF131	7690	symbol	H. sapiens	7690	H. sapiens	ZNF131	zinc finger protein 131	GO:0000122 negative regulation of transcription by RNA polymerase II;GO:0045892 negative regulation of transcription, DNA-templated;GO:1903507 negative regulation of nucleic acid-templated transcription		Transcription factors:Zinc-coordinating DNA-binding domains; Predicted intracellular proteins	Nucleoplasm (Enhanced); Additional: Intermediate filaments				0.0	0.0	0.0	0.0	0.0	0.0	0.0	0.0	0.0	0.0	0.0	0.0	0.0	0.0	0.0	0.0	0.0	0.0	0.0	0.0
FBXO11	80204	symbol	H. sapiens	80204	H. sapiens	FBXO11	F-box protein 11	GO:0035246 peptidyl-arginine N-methylation;GO:0018216 peptidyl-arginine methylation;GO:0018195 peptidyl-arginine modification		Cancer-related genes:Mutational cancer driver genes; Predicted intracellular proteins; Disease related genes	Nucleoli;Nucleoplasm (Supported)		(M261)PID P53 REGULATION PATHWAY		0.0	0.0	0.0	0.0	0.0	0.0	0.0	0.0	0.0	1.0	1.0	0.0	0.0	0.0	0.0	0.0	0.0	0.0	0.0	0.0
HARS2	23438	symbol	H. sapiens	23438	H. sapiens	HARS2	histidyl-tRNA synthetase 2, mitochondrial	GO:0006427 histidyl-tRNA aminoacylation;GO:0006418 tRNA aminoacylation for protein translation;GO:0043039 tRNA aminoacylation		Disease related genes; ENZYME proteins:Ligase; Predicted intracellular proteins; Potential drug targets; Enzymes	Cytosol (Approved)				0.0	0.0	0.0	0.0	0.0	0.0	0.0	0.0	1.0	0.0	0.0	0.0	0.0	0.0	0.0	0.0	0.0	0.0	0.0	0.0
SMARCAD1	56916	symbol	H. sapiens	56916	H. sapiens	SMARCAD1	SWI/SNF-related, matrix-associated actin-dependent regulator of chromatin, subfamily a, containing DEAD/H box 1	GO:0070933 histone H4 deacetylation;GO:0000729 DNA double-strand break processing;GO:0070932 histone H3 deacetylation		Disease related genes; Predicted intracellular proteins; Potential drug targets; ENZYME proteins:Hydrolases; Enzymes	Nucleoplasm (Enhanced)				0.0	1.0	0.0	0.0	0.0	1.0	0.0	0.0	0.0	0.0	0.0	0.0	0.0	1.0	0.0	0.0	0.0	1.0	0.0	0.0
SMC6	79677	symbol	H. sapiens	79677	H. sapiens	SMC6	structural maintenance of chromosomes 6	GO:0051984 positive regulation of chromosome segregation;GO:0000722 telomere maintenance via recombination;GO:0006312 mitotic recombination		Predicted intracellular proteins	Nucleoplasm (Supported)			(M5925)HALLMARK E2F TARGETS	0.0	1.0	0.0	0.0	0.0	0.0	0.0	0.0	0.0	0.0	0.0	0.0	0.0	1.0	0.0	0.0	0.0	1.0	0.0	1.0
EDA2R	60401	symbol	H. sapiens	60401	H. sapiens	EDA2R	ectodysplasin A2 receptor	GO:0010668 ectodermal cell differentiation;GO:0007398 ectoderm development;GO:0072332 intrinsic apoptotic signaling pathway by p53 class mediator			Cell Junctions (Approved)				0.0	0.0	0.0	0.0	0.0	0.0	0.0	0.0	0.0	0.0	0.0	0.0	0.0	0.0	0.0	0.0	0.0	0.0	0.0	1.0
METTL6	131965	symbol	H. sapiens	131965	H. sapiens	METTL6	methyltransferase 6, methylcytidine	GO:0030488 tRNA methylation;GO:0001510 RNA methylation;GO:0006400 tRNA modification		Predicted intracellular proteins	Vesicles (Approved)				0.0	0.0	0.0	0.0	0.0	0.0	0.0	0.0	0.0	1.0	0.0	0.0	0.0	0.0	0.0	0.0	0.0	0.0	0.0	0.0
GGH	8836	symbol	H. sapiens	8836	H. sapiens	GGH	gamma-glutamyl hydrolase	GO:0070500 poly-gamma-glutamate metabolic process;GO:0046900 tetrahydrofolylpolyglutamate metabolic process;GO:0006760 folic acid-containing compound metabolic process		Predicted intracellular proteins; Peptidases:Cysteine-type peptidases; Enzymes; ENZYME proteins:Hydrolases				(M5941)HALLMARK UV RESPONSE UP	0.0	0.0	0.0	0.0	0.0	0.0	0.0	0.0	0.0	0.0	0.0	0.0	0.0	0.0	0.0	0.0	0.0	0.0	0.0	0.0
EGFL6	25975	symbol	H. sapiens	25975	H. sapiens	EGFL6	EGF like domain multiple 6	GO:0010811 positive regulation of cell-substrate adhesion;GO:0010810 regulation of cell-substrate adhesion;GO:0030198 extracellular matrix organization		Predicted secreted proteins			(M5883)NABA SECRETED FACTORS; (M5885)NABA MATRISOME ASSOCIATED; (M5889)NABA MATRISOME		0.0	0.0	0.0	0.0	0.0	0.0	0.0	0.0	0.0	0.0	0.0	0.0	0.0	0.0	0.0	0.0	0.0	0.0	0.0	0.0
SLC35A1	10559	symbol	H. sapiens	10559	H. sapiens	SLC35A1	solute carrier family 35 member A1	GO:0015782 CMP-N-acetylneuraminate transmembrane transport;GO:0072334 UDP-galactose transmembrane transport;GO:0090481 pyrimidine nucleotide-sugar transmembrane transport		Potential drug targets; Disease related genes; Transporters:Electrochemical Potential-driven transporters					0.0	0.0	0.0	0.0	0.0	0.0	0.0	0.0	0.0	0.0	0.0	0.0	1.0	0.0	0.0	0.0	0.0	0.0	0.0	0.0
CYB5R2	51700	symbol	H. sapiens	51700	H. sapiens	CYB5R2	cytochrome b5 reductase 2	GO:0015701 bicarbonate transport;GO:0016126 sterol biosynthetic process;GO:0016125 sterol metabolic process		ENZYME proteins:Oxidoreductases; Predicted intracellular proteins; Enzymes	Golgi apparatus (Approved); Additional: Nucleoplasm				0.0	0.0	0.0	0.0	0.0	0.0	0.0	0.0	0.0	0.0	0.0	0.0	0.0	0.0	0.0	0.0	0.0	0.0	0.0	0.0
ADAM28	10863	symbol	H. sapiens	10863	H. sapiens	ADAM28	ADAM metallopeptidase domain 28	GO:0007283 spermatogenesis;GO:0048232 male gamete generation;GO:0007276 gamete generation		Transporters:Accessory Factors Involved in Transport; Predicted secreted proteins	Plasma membrane (Approved); Additional: Mitochondria	N-[(Furan-2-Yl)Carbonyl]-(S)-Leucyl-(R)-[1-Amino-2(1h-Indol-3-Yl)Ethyl]-Phosphonic Acid; Furoyl-Leucine; Ilomastat; 2-(Thiomethylene)-4-Methylpentanoic Acid; Pidolic acid; Batimastat; (2R,3R)-N^1^-[(1S)-2,2-DIMETHYL-1-(METHYLCARBAMOYL)PROPYL]-N^4^-HYDROXY-2-(2-METHYLPROPYL)-3-{[(1,3-THIAZOL-2-YLCARBONYL)AMINO]METHYL}BUTANEDIAMIDE	(M277)PID INTEGRIN A4B1 PATHWAY; (M3468)NABA ECM REGULATORS; (M5885)NABA MATRISOME ASSOCIATED		0.0	0.0	0.0	0.0	0.0	0.0	0.0	0.0	0.0	0.0	0.0	0.0	0.0	0.0	0.0	1.0	0.0	0.0	0.0	0.0
LRRC66	339977	symbol	H. sapiens	339977	H. sapiens	LRRC66	leucine rich repeat containing 66								0.0	0.0	0.0	0.0	0.0	0.0	0.0	0.0	0.0	0.0	0.0	0.0	0.0	0.0	0.0	0.0	0.0	0.0	0.0	0.0
ZNF630	57232	symbol	H. sapiens	57232	H. sapiens	ZNF630	zinc finger protein 630	GO:0006357 regulation of transcription by RNA polymerase II;GO:0006366 transcription by RNA polymerase II;GO:0006355 regulation of transcription, DNA-templated		Predicted intracellular proteins	Nucleoplasm (Approved); Additional: Cytosol				0.0	0.0	0.0	0.0	0.0	0.0	0.0	0.0	0.0	0.0	0.0	0.0	0.0	0.0	0.0	0.0	0.0	0.0	0.0	0.0
SLC25A36	55186	symbol	H. sapiens	55186	H. sapiens	SLC25A36	solute carrier family 25 member 36	GO:0006864 pyrimidine nucleotide transport;GO:1990519 pyrimidine nucleotide import into mitochondrion;GO:0072531 pyrimidine-containing compound transmembrane transport		Predicted intracellular proteins; Transporters:Electrochemical Potential-driven transporters	Cytosol;Mitochondria (Approved); Additional: Nucleoplasm				0.0	0.0	0.0	0.0	0.0	0.0	0.0	0.0	0.0	0.0	0.0	0.0	1.0	0.0	0.0	0.0	0.0	0.0	0.0	0.0
ZMYM6	9204	symbol	H. sapiens	9204	H. sapiens	ZMYM6	zinc finger MYM-type containing 6	GO:0022604 regulation of cell morphogenesis;GO:0022603 regulation of anatomical structure morphogenesis;GO:0000902 cell morphogenesis		Predicted intracellular proteins	Nucleoplasm (Approved)				0.0	0.0	0.0	0.0	0.0	0.0	0.0	0.0	0.0	0.0	0.0	0.0	0.0	0.0	0.0	0.0	0.0	0.0	0.0	0.0
ZSCAN32	54925	symbol	H. sapiens	54925	H. sapiens	ZSCAN32	zinc finger and SCAN domain containing 32	GO:0006357 regulation of transcription by RNA polymerase II;GO:0006366 transcription by RNA polymerase II;GO:0006355 regulation of transcription, DNA-templated		Transcription factors:Zinc-coordinating DNA-binding domains; Predicted intracellular proteins	Nucleoplasm (Approved); Additional: Cytosol				0.0	0.0	0.0	0.0	0.0	0.0	0.0	0.0	0.0	0.0	0.0	0.0	0.0	0.0	0.0	0.0	0.0	0.0	0.0	0.0
HNRNPUL2	221092	symbol	H. sapiens	221092	H. sapiens	HNRNPUL2	heterogeneous nuclear ribonucleoprotein U like 2	GO:0008150 biological_process		Predicted intracellular proteins	Nucleoplasm (Enhanced)				0.0	0.0	0.0	0.0	0.0	0.0	0.0	0.0	0.0	0.0	0.0	0.0	0.0	0.0	0.0	0.0	0.0	0.0	0.0	0.0
IL21-AS1	100996941	symbol	H. sapiens	100996941	H. sapiens	IL21-AS1	IL21 antisense RNA 1								0.0	0.0	0.0	0.0	0.0	0.0	0.0	0.0	0.0	0.0	0.0	0.0	0.0	0.0	0.0	0.0	0.0	0.0	0.0	0.0
ZNF420	147923	symbol	H. sapiens	147923	H. sapiens	ZNF420	zinc finger protein 420	GO:0006357 regulation of transcription by RNA polymerase II;GO:0006366 transcription by RNA polymerase II;GO:0006355 regulation of transcription, DNA-templated		Transcription factors:Zinc-coordinating DNA-binding domains; Predicted intracellular proteins	Nucleoplasm (Approved)				0.0	0.0	0.0	0.0	0.0	0.0	0.0	0.0	0.0	0.0	0.0	0.0	0.0	1.0	0.0	0.0	0.0	0.0	0.0	0.0
C12orf4	57102	symbol	H. sapiens	57102	H. sapiens	C12orf4	chromosome 12 open reading frame 4	GO:0043304 regulation of mast cell degranulation;GO:0033006 regulation of mast cell activation involved in immune response;GO:0033003 regulation of mast cell activation		Predicted intracellular proteins	Nuclear bodies (Approved)				0.0	0.0	0.0	0.0	0.0	0.0	0.0	0.0	0.0	0.0	0.0	0.0	0.0	0.0	0.0	0.0	0.0	0.0	0.0	0.0
RBPJ	3516	symbol	H. sapiens	3516	H. sapiens	RBPJ	recombination signal binding protein for immunoglobulin kappa J region	GO:1901189 positive regulation of ephrin receptor signaling pathway;GO:1901297 positive regulation of canonical Wnt signaling pathway involved in cardiac muscle cell fate commitment;GO:1905068 positive regulation of canonical Wnt signaling pathway involved in heart development		Predicted intracellular proteins; Disease related genes; Transcription factors:Immunoglobulin fold	Nucleoplasm (Supported)		(M70)PID PS1 PATHWAY; (M288)PID HES HEY PATHWAY; (M17)PID NOTCH PATHWAY	(M5895)HALLMARK WNT BETA CATENIN SIGNALING; (M5891)HALLMARK HYPOXIA	0.0	0.0	0.0	0.0	0.0	0.0	0.0	0.0	0.0	0.0	0.0	0.0	0.0	0.0	0.0	0.0	0.0	0.0	0.0	0.0
GNPAT	8443	symbol	H. sapiens	8443	H. sapiens	GNPAT	glyceronephosphate O-acyltransferase	GO:0030913 paranodal junction assembly;GO:0008611 ether lipid biosynthetic process;GO:0046504 glycerol ether biosynthetic process		Disease related genes; ENZYME proteins:Transferases; Predicted intracellular proteins; Potential drug targets; Enzymes				(M5949)HALLMARK PEROXISOME; (M5948)HALLMARK BILE ACID METABOLISM	0.0	0.0	0.0	0.0	0.0	0.0	0.0	0.0	0.0	0.0	0.0	0.0	0.0	0.0	0.0	0.0	0.0	0.0	0.0	0.0
PON2	5445	symbol	H. sapiens	5445	H. sapiens	PON2	paraoxonase 2	GO:0009636 response to toxic substance;GO:0006979 response to oxidative stress;GO:0019439 aromatic compound catabolic process		Predicted intracellular proteins; ENZYME proteins:Hydrolases; Candidate cardiovascular disease genes; Predicted secreted proteins; Enzymes					0.0	0.0	0.0	0.0	0.0	0.0	0.0	0.0	1.0	0.0	0.0	0.0	0.0	0.0	0.0	0.0	0.0	0.0	0.0	0.0
ERV3-1	2086	symbol	H. sapiens	2086	H. sapiens	ERV3-1	endogenous retrovirus group 3 member 1, envelope	GO:0008150 biological_process		Predicted intracellular proteins	Vesicles (Approved)				0.0	0.0	0.0	0.0	0.0	0.0	0.0	0.0	0.0	0.0	0.0	0.0	0.0	0.0	0.0	0.0	0.0	0.0	0.0	0.0
KLF8	11279	symbol	H. sapiens	11279	H. sapiens	KLF8	Kruppel like factor 8	GO:0000122 negative regulation of transcription by RNA polymerase II;GO:0045892 negative regulation of transcription, DNA-templated;GO:1903507 negative regulation of nucleic acid-templated transcription		Transcription factors:Zinc-coordinating DNA-binding domains; Predicted intracellular proteins	Nucleoplasm (Supported)		(M281)PID FAK PATHWAY		0.0	0.0	0.0	0.0	0.0	0.0	0.0	0.0	0.0	0.0	0.0	0.0	0.0	0.0	0.0	0.0	0.0	0.0	0.0	0.0
S100A4	6275	symbol	H. sapiens	6275	H. sapiens	S100A4	S100 calcium binding protein A4	GO:0001837 epithelial to mesenchymal transition;GO:0043123 positive regulation of I-kappaB kinase/NF-kappaB signaling;GO:0048762 mesenchymal cell differentiation		Predicted intracellular proteins; Cancer-related genes:Candidate cancer biomarkers	Plasma membrane (Enhanced)	Trifluoperazine; Copper	(M5883)NABA SECRETED FACTORS; (M5885)NABA MATRISOME ASSOCIATED; (M5889)NABA MATRISOME	(M5944)HALLMARK ANGIOGENESIS; (M5891)HALLMARK HYPOXIA; (M5939)HALLMARK P53 PATHWAY	0.0	0.0	0.0	0.0	0.0	0.0	0.0	0.0	0.0	0.0	0.0	0.0	0.0	0.0	0.0	0.0	0.0	0.0	0.0	0.0
CSPP1	79848	symbol	H. sapiens	79848	H. sapiens	CSPP1	centrosome and spindle pole associated protein 1	GO:0032467 positive regulation of cytokinesis;GO:0051781 positive regulation of cell division;GO:0032465 regulation of cytokinesis		Predicted intracellular proteins; Disease related genes	Centriolar satellite (Supported)				0.0	0.0	1.0	1.0	0.0	0.0	0.0	0.0	0.0	0.0	0.0	0.0	0.0	0.0	0.0	0.0	0.0	0.0	0.0	0.0
NTN1	9423	symbol	H. sapiens	9423	H. sapiens	NTN1	netrin 1	GO:0061643 chemorepulsion of axon;GO:0033564 anterior/posterior axon guidance;GO:0006930 substrate-dependent cell migration, cell extension		Predicted intracellular proteins; Predicted secreted proteins; Cancer-related genes:Candidate cancer biomarkers			(M108)PID NETRIN PATHWAY; (M5887)NABA BASEMENT MEMBRANES; (M3008)NABA ECM GLYCOPROTEINS		0.0	0.0	1.0	0.0	0.0	0.0	0.0	0.0	0.0	0.0	0.0	0.0	0.0	0.0	0.0	0.0	0.0	0.0	0.0	0.0
ADGRD1	283383	symbol	H. sapiens	283383	H. sapiens	ADGRD1	adhesion G protein-coupled receptor D1	GO:0007189 adenylate cyclase-activating G protein-coupled receptor signaling pathway;GO:0007188 adenylate cyclase-modulating G protein-coupled receptor signaling pathway;GO:0007186 G protein-coupled receptor signaling pathway		G-protein coupled receptors:Family 2 (B) receptors; Predicted intracellular proteins; G-protein coupled receptors:GPCRs excl olfactory receptors	Plasma membrane (Supported); Additional: Nucleoplasm	Onapristone			0.0	0.0	0.0	0.0	0.0	0.0	0.0	0.0	0.0	0.0	0.0	0.0	0.0	0.0	0.0	0.0	0.0	0.0	0.0	0.0
TSSK4	283629	symbol	H. sapiens	283629	H. sapiens	TSSK4	testis specific serine kinase 4	GO:1990443 peptidyl-threonine autophosphorylation;GO:0032793 positive regulation of CREB transcription factor activity;GO:0030317 flagellated sperm motility	CAMK Ser/Thr protein kinase family	Kinases:CAMK Ser/Thr protein kinases; Predicted intracellular proteins; Enzymes; ENZYME proteins:Transferases	Cell Junctions (Approved)				0.0	0.0	0.0	0.0	0.0	0.0	0.0	0.0	0.0	0.0	0.0	0.0	0.0	0.0	0.0	1.0	0.0	0.0	0.0	0.0
RAP2C-AS1	101928578	symbol	H. sapiens	101928578	H. sapiens	RAP2C-AS1	RAP2C antisense RNA 1								0.0	0.0	0.0	0.0	0.0	0.0	0.0	0.0	0.0	0.0	0.0	0.0	0.0	0.0	0.0	0.0	0.0	0.0	0.0	0.0
EIF2AK1	27102	symbol	H. sapiens	27102	H. sapiens	EIF2AK1	eukaryotic translation initiation factor 2 alpha kinase 1	GO:0010999 regulation of eIF2 alpha phosphorylation by heme;GO:0045993 negative regulation of translational initiation by iron;GO:0046986 negative regulation of hemoglobin biosynthetic process	Other	Predicted intracellular proteins; Enzymes; Kinases; ENZYME proteins:Transferases	Nucleoplasm (Supported); Additional: Cytosol	Fostamatinib		(M5945)HALLMARK HEME METABOLISM	0.0	0.0	0.0	0.0	0.0	0.0	0.0	0.0	1.0	0.0	0.0	0.0	0.0	0.0	0.0	0.0	0.0	0.0	0.0	0.0
SH3BP5-AS1	100505696	symbol	H. sapiens	100505696	H. sapiens	SH3BP5-AS1	SH3BP5 antisense RNA 1								0.0	0.0	0.0	0.0	0.0	0.0	0.0	0.0	0.0	0.0	0.0	0.0	0.0	0.0	0.0	0.0	0.0	0.0	0.0	0.0
WDR19	57728	symbol	H. sapiens	57728	H. sapiens	WDR19	WD repeat domain 19	GO:0060830 ciliary receptor clustering involved in smoothened signaling pathway;GO:0061055 myotome development;GO:1903441 protein localization to ciliary membrane		Predicted intracellular proteins; Disease related genes	Nucleoplasm (Approved)				0.0	0.0	1.0	0.0	0.0	0.0	0.0	0.0	0.0	0.0	0.0	0.0	1.0	0.0	0.0	0.0	0.0	0.0	0.0	0.0
SMOC2	64094	symbol	H. sapiens	64094	H. sapiens	SMOC2	SPARC related modular calcium binding 2	GO:0035470 positive regulation of vascular wound healing;GO:1900748 positive regulation of vascular endothelial growth factor signaling pathway;GO:0045743 positive regulation of fibroblast growth factor receptor signaling pathway		Predicted intracellular proteins; Disease related genes; Predicted secreted proteins			(M3008)NABA ECM GLYCOPROTEINS; (M5884)NABA CORE MATRISOME; (M5889)NABA MATRISOME		0.0	0.0	0.0	0.0	0.0	0.0	0.0	0.0	0.0	0.0	0.0	0.0	0.0	1.0	0.0	0.0	0.0	0.0	0.0	0.0
ZNF75D	7626	symbol	H. sapiens	7626	H. sapiens	ZNF75D	zinc finger protein 75D	GO:0006357 regulation of transcription by RNA polymerase II;GO:0006366 transcription by RNA polymerase II;GO:0006355 regulation of transcription, DNA-templated		Transcription factors:Zinc-coordinating DNA-binding domains; Predicted intracellular proteins	Golgi apparatus;Nucleoplasm (Approved)				0.0	0.0	0.0	0.0	0.0	0.0	0.0	0.0	0.0	0.0	0.0	0.0	0.0	0.0	0.0	0.0	0.0	0.0	0.0	0.0
SPATA18	132671	symbol	H. sapiens	132671	H. sapiens	SPATA18	spermatogenesis associated 18	GO:0035695 mitophagy by induced vacuole formation;GO:0035694 mitochondrial protein catabolic process;GO:0000422 autophagy of mitochondrion		Predicted intracellular proteins	Mitochondria (Supported)		(M256)PID TAP63 PATHWAY		0.0	1.0	0.0	0.0	0.0	0.0	0.0	0.0	0.0	0.0	0.0	0.0	0.0	0.0	0.0	0.0	0.0	0.0	0.0	0.0
MYOZ3	91977	symbol	H. sapiens	91977	H. sapiens	MYOZ3	myozenin 3			Predicted intracellular proteins					0.0	0.0	0.0	0.0	0.0	0.0	0.0	0.0	0.0	0.0	0.0	0.0	0.0	0.0	0.0	0.0	0.0	0.0	0.0	0.0
RABL3	285282	symbol	H. sapiens	285282	H. sapiens	RABL3	RAB, member of RAS oncogene family like 3	GO:1903059 regulation of protein lipidation;GO:0050746 regulation of lipoprotein metabolic process;GO:0001779 natural killer cell differentiation		Predicted intracellular proteins	Nucleoplasm (Approved)				0.0	0.0	0.0	0.0	0.0	0.0	0.0	0.0	0.0	0.0	0.0	0.0	0.0	0.0	0.0	0.0	0.0	0.0	0.0	0.0
CCNG2	901	symbol	H. sapiens	901	H. sapiens	CCNG2	cyclin G2	GO:0000079 regulation of cyclin-dependent protein serine/threonine kinase activity;GO:1904029 regulation of cyclin-dependent protein kinase activity;GO:0071900 regulation of protein serine/threonine kinase activity		Predicted intracellular proteins; Cancer-related genes:Candidate cancer biomarkers	Cytosol;Nucleoplasm (Approved)			(M5891)HALLMARK HYPOXIA; (M5905)HALLMARK ADIPOGENESIS	0.0	0.0	0.0	1.0	0.0	0.0	0.0	0.0	0.0	0.0	0.0	0.0	0.0	0.0	0.0	0.0	0.0	0.0	0.0	0.0
CYP39A1	51302	symbol	H. sapiens	51302	H. sapiens	CYP39A1	cytochrome P450 family 39 subfamily A member 1	GO:0006707 cholesterol catabolic process;GO:0016127 sterol catabolic process;GO:0006706 steroid catabolic process		ENZYME proteins:Oxidoreductases; Enzymes				(M5948)HALLMARK BILE ACID METABOLISM; (M5956)HALLMARK KRAS SIGNALING DN	0.0	0.0	0.0	0.0	0.0	0.0	0.0	0.0	1.0	0.0	0.0	0.0	0.0	0.0	0.0	0.0	0.0	0.0	0.0	0.0
VPS26A	9559	symbol	H. sapiens	9559	H. sapiens	VPS26A	VPS26, retromer complex component A	GO:0032456 endocytic recycling;GO:0042147 retrograde transport, endosome to Golgi;GO:0098876 vesicle-mediated transport to the plasma membrane		Predicted intracellular proteins	Endosomes;Lysosomes (Enhanced)				0.0	0.0	0.0	0.0	0.0	0.0	0.0	0.0	0.0	0.0	0.0	0.0	0.0	0.0	0.0	0.0	0.0	0.0	0.0	0.0
GDNF-AS1	100861519	symbol	H. sapiens	100861519	H. sapiens	GDNF-AS1	GDNF antisense RNA 1								0.0	0.0	0.0	0.0	0.0	0.0	0.0	0.0	0.0	0.0	0.0	0.0	0.0	0.0	0.0	0.0	0.0	0.0	0.0	0.0
PAXIP1	22976	symbol	H. sapiens	22976	H. sapiens	PAXIP1	PAX interacting protein 1	GO:0000416 positive regulation of histone H3-K36 methylation;GO:0000414 regulation of histone H3-K36 methylation;GO:0060717 chorion development		Predicted intracellular proteins	Nucleoplasm;Vesicles (Approved)			(M5937)HALLMARK GLYCOLYSIS	0.0	1.0	0.0	0.0	0.0	1.0	0.0	0.0	0.0	1.0	0.0	0.0	0.0	1.0	0.0	0.0	1.0	0.0	0.0	0.0
AIMP1	9255	symbol	H. sapiens	9255	H. sapiens	AIMP1	aminoacyl tRNA synthetase complex interacting multifunctional protein 1	GO:0070094 positive regulation of glucagon secretion;GO:0070091 glucagon secretion;GO:0070092 regulation of glucagon secretion		Predicted intracellular proteins; Disease related genes; Predicted secreted proteins	Cytosol (Enhanced)				0.0	0.0	0.0	0.0	0.0	0.0	0.0	0.0	1.0	0.0	0.0	0.0	0.0	0.0	0.0	0.0	0.0	0.0	0.0	0.0
OSBPL11	114885	symbol	H. sapiens	114885	H. sapiens	OSBPL11	oxysterol binding protein like 11	GO:0010890 positive regulation of sequestering of triglyceride;GO:0010889 regulation of sequestering of triglyceride;GO:0030730 sequestering of triglyceride		Predicted intracellular proteins	Golgi apparatus;Nucleoplasm (Approved)				0.0	0.0	0.0	0.0	0.0	0.0	0.0	0.0	0.0	0.0	0.0	0.0	0.0	0.0	0.0	0.0	0.0	0.0	0.0	0.0
KIF2A	3796	symbol	H. sapiens	3796	H. sapiens	KIF2A	kinesin family member 2A	GO:0007019 microtubule depolymerization;GO:0090307 mitotic spindle assembly;GO:0051261 protein depolymerization		Predicted intracellular proteins; Disease related genes; Cancer-related genes:Candidate cancer biomarkers	Centrosome;Nucleoli;Nucleoplasm (Enhanced)		(M129)PID PLK1 PATHWAY	(M5921)HALLMARK COMPLEMENT; (M5937)HALLMARK GLYCOLYSIS	0.0	0.0	0.0	1.0	0.0	0.0	0.0	0.0	0.0	0.0	0.0	1.0	0.0	0.0	1.0	0.0	0.0	1.0	0.0	0.0
DTWD1	56986	symbol	H. sapiens	56986	H. sapiens	DTWD1	DTW domain containing 1	GO:0006400 tRNA modification;GO:0008033 tRNA processing;GO:0009451 RNA modification		Predicted intracellular proteins	Nucleoli rim (Approved); Additional: Mitotic chromosome;Nucleoplasm;Vesicles				0.0	0.0	0.0	0.0	0.0	0.0	0.0	0.0	0.0	0.0	0.0	0.0	0.0	0.0	0.0	0.0	0.0	0.0	0.0	0.0
TPTE2P1	646405	symbol	H. sapiens	646405	H. sapiens	TPTE2P1	transmembrane phosphoinositide 3-phosphatase and tensin homolog 2 pseudogene 1								0.0	0.0	0.0	0.0	0.0	0.0	0.0	0.0	0.0	0.0	0.0	0.0	0.0	0.0	0.0	0.0	0.0	0.0	0.0	0.0
SCN1A	6323	symbol	H. sapiens	6323	H. sapiens	SCN1A	sodium voltage-gated channel alpha subunit 1	GO:0050966 detection of mechanical stimulus involved in sensory perception of pain;GO:0062149 detection of stimulus involved in sensory perception of pain;GO:0019228 neuronal action potential		Disease related genes; Predicted intracellular proteins; Transporters:Transporter channels and pores; Voltage-gated ion channels:Voltage-Gated Sodium Channels; FDA approved drug targets:Small molecule drugs	Nucleoplasm;Plasma membrane (Supported); Additional: Nuclear bodies	Ranolazine; Phenytoin; Topiramate; Valproic acid; Lamotrigine; Carbamazepine; Oxcarbazepine; Cocaine; Zonisamide; Promethazine; Phenacemide; Phenazopyridine; Nitrazepam; Permethrin; Tetrodotoxin; Brivaracetam; Tetracaine; Amylocaine; Propoxycaine; Pramocaine; Pentoxyverine; Dichlorobenzyl alcohol; Bioallethrin; Fish oil			0.0	0.0	0.0	0.0	0.0	0.0	0.0	0.0	0.0	0.0	0.0	0.0	0.0	0.0	0.0	0.0	0.0	0.0	0.0	0.0
IKZF4	64375	symbol	H. sapiens	64375	H. sapiens	IKZF4	IKAROS family zinc finger 4	GO:0051260 protein homooligomerization;GO:0051259 protein complex oligomerization;GO:0045892 negative regulation of transcription, DNA-templated		Transcription factors:Zinc-coordinating DNA-binding domains; Predicted intracellular proteins	Nuclear bodies;Nucleoplasm (Supported)			(M5947)HALLMARK IL2 STAT5 SIGNALING	0.0	0.0	0.0	0.0	0.0	0.0	0.0	0.0	0.0	0.0	0.0	0.0	0.0	0.0	0.0	0.0	0.0	0.0	0.0	0.0
PSME4	23198	symbol	H. sapiens	23198	H. sapiens	PSME4	proteasome activator subunit 4	GO:0010499 proteasomal ubiquitin-independent protein catabolic process;GO:0035093 spermatogenesis, exchange of chromosomal proteins;GO:0035092 sperm chromatin condensation		Predicted intracellular proteins	Nucleoplasm (Supported)				1.0	1.0	0.0	1.0	0.0	0.0	0.0	0.0	0.0	0.0	1.0	0.0	0.0	1.0	0.0	1.0	0.0	0.0	0.0	1.0
BTD	686	symbol	H. sapiens	686	H. sapiens	BTD	biotinidase	GO:0006768 biotin metabolic process;GO:0006767 water-soluble vitamin metabolic process;GO:0006766 vitamin metabolic process		Disease related genes; Predicted intracellular proteins; Potential drug targets; ENZYME proteins:Hydrolases; Predicted secreted proteins; Enzymes					0.0	0.0	0.0	0.0	0.0	0.0	0.0	0.0	0.0	0.0	0.0	0.0	0.0	0.0	0.0	0.0	0.0	0.0	0.0	0.0
CDADC1	81602	symbol	H. sapiens	81602	H. sapiens	CDADC1	cytidine and dCMP deaminase domain containing 1	GO:0070383 DNA cytosine deamination;GO:0006216 cytidine catabolic process;GO:0009972 cytidine deamination		Predicted intracellular proteins	Nucleoplasm (Approved)			(M5953)HALLMARK KRAS SIGNALING UP	0.0	0.0	0.0	0.0	0.0	0.0	0.0	0.0	1.0	0.0	0.0	0.0	0.0	0.0	0.0	0.0	0.0	0.0	0.0	0.0
NOC3L	64318	symbol	H. sapiens	64318	H. sapiens	NOC3L	NOC3 like DNA replication regulator	GO:0006270 DNA replication initiation;GO:0006261 DNA-dependent DNA replication;GO:0045444 fat cell differentiation		Predicted intracellular proteins	Nucleoli;Nucleoli rim (Enhanced); Additional: Nucleoplasm				0.0	0.0	0.0	0.0	0.0	0.0	0.0	0.0	0.0	0.0	0.0	0.0	0.0	0.0	0.0	0.0	0.0	0.0	0.0	0.0
RIPK3	11035	symbol	H. sapiens	11035	H. sapiens	RIPK3	receptor interacting serine/threonine kinase 3	GO:0035698 CD8-positive, alpha-beta cytotoxic T cell extravasation;GO:2000452 regulation of CD8-positive, alpha-beta cytotoxic T cell extravasation;GO:0097528 execution phase of necroptosis	TKL Ser/Thr protein kinase family	Predicted intracellular proteins; Kinases:TKL Ser/Thr protein kinases; Enzymes; ENZYME proteins:Transferases					0.0	0.0	0.0	0.0	0.0	0.0	0.0	0.0	0.0	0.0	0.0	0.0	0.0	0.0	0.0	0.0	0.0	0.0	0.0	1.0
LOC101928034	101928034	Gene_ID	H. sapiens	101928034	H. sapiens	LOC101928034	uncharacterized LOC101928034								0.0	0.0	0.0	0.0	0.0	0.0	0.0	0.0	0.0	0.0	0.0	0.0	0.0	0.0	0.0	0.0	0.0	0.0	0.0	0.0
LDAH	60526	symbol	H. sapiens	60526	H. sapiens	LDAH	lipid droplet associated hydrolase	GO:0019915 lipid storage;GO:0016042 lipid catabolic process;GO:0051235 maintenance of location		Predicted intracellular proteins					0.0	0.0	0.0	0.0	0.0	0.0	0.0	0.0	0.0	0.0	0.0	0.0	0.0	0.0	0.0	0.0	0.0	0.0	0.0	0.0
BMP2K	55589	symbol	H. sapiens	55589	H. sapiens	BMP2K	BMP2 inducible kinase	GO:2000369 regulation of clathrin-dependent endocytosis;GO:0045747 positive regulation of Notch signaling pathway;GO:0072583 clathrin-dependent endocytosis	Other	Predicted intracellular proteins; Enzymes; Kinases; ENZYME proteins:Transferases	Nuclear speckles (Supported)	Fostamatinib		(M5945)HALLMARK HEME METABOLISM	0.0	0.0	0.0	0.0	0.0	0.0	0.0	0.0	0.0	0.0	0.0	0.0	0.0	0.0	0.0	0.0	0.0	0.0	0.0	0.0
IKZF5	64376	symbol	H. sapiens	64376	H. sapiens	IKZF5	IKAROS family zinc finger 5	GO:0000122 negative regulation of transcription by RNA polymerase II;GO:0045892 negative regulation of transcription, DNA-templated;GO:1903507 negative regulation of nucleic acid-templated transcription		Transcription factors:Zinc-coordinating DNA-binding domains; Predicted intracellular proteins	Nucleoplasm (Supported); Additional: Cytosol;Plasma membrane				0.0	0.0	0.0	0.0	0.0	0.0	0.0	0.0	0.0	0.0	0.0	0.0	0.0	0.0	0.0	0.0	0.0	0.0	0.0	0.0
CEP295	85459	symbol	H. sapiens	85459	H. sapiens	CEP295	centrosomal protein 295	GO:0010825 positive regulation of centrosome duplication;GO:1903724 positive regulation of centriole elongation;GO:0046601 positive regulation of centriole replication		Predicted intracellular proteins	Cytosol;Plasma membrane (Enhanced)				0.0	0.0	1.0	0.0	0.0	1.0	0.0	1.0	0.0	0.0	0.0	1.0	0.0	0.0	1.0	0.0	0.0	0.0	0.0	0.0
KDM3A	55818	symbol	H. sapiens	55818	H. sapiens	KDM3A	lysine demethylase 3A	GO:0046293 formaldehyde biosynthetic process;GO:0046292 formaldehyde metabolic process;GO:0007290 spermatid nucleus elongation		Predicted intracellular proteins	Nucleoplasm (Enhanced)		(M58)PID AR PATHWAY	(M5891)HALLMARK HYPOXIA	0.0	0.0	0.0	0.0	0.0	1.0	0.0	0.0	0.0	1.0	0.0	0.0	0.0	0.0	0.0	1.0	0.0	0.0	0.0	0.0
USP43	124739	symbol	H. sapiens	124739	H. sapiens	USP43	ubiquitin specific peptidase 43	GO:0019985 translesion synthesis;GO:0006301 postreplication repair;GO:0000731 DNA synthesis involved in DNA repair		Predicted intracellular proteins; Peptidases:Cysteine-type peptidases; Enzymes; ENZYME proteins:Hydrolases					0.0	1.0	0.0	0.0	0.0	0.0	0.0	0.0	0.0	0.0	1.0	0.0	0.0	1.0	0.0	0.0	0.0	0.0	0.0	0.0
AFF1	4299	symbol	H. sapiens	4299	H. sapiens	AFF1	AF4/FMR2 family member 1	GO:0010468 regulation of gene expression;GO:0060255 regulation of macromolecule metabolic process;GO:0010467 gene expression		Predicted intracellular proteins; Disease related genes; Cancer-related genes	Mitochondria;Nucleoplasm (Approved)			(M5906)HALLMARK ESTROGEN RESPONSE EARLY; (M5907)HALLMARK ESTROGEN RESPONSE LATE	0.0	0.0	0.0	0.0	0.0	0.0	0.0	0.0	0.0	0.0	0.0	0.0	0.0	0.0	0.0	0.0	0.0	0.0	0.0	0.0
OTUD6B-AS1	100506365	symbol	H. sapiens	100506365	H. sapiens	OTUD6B-AS1	OTUD6B antisense RNA 1 (head to head)								0.0	0.0	0.0	0.0	0.0	0.0	0.0	0.0	0.0	0.0	0.0	0.0	0.0	0.0	0.0	0.0	0.0	0.0	0.0	0.0
SCN2A	6326	symbol	H. sapiens	6326	H. sapiens	SCN2A	sodium voltage-gated channel alpha subunit 2	GO:0008627 intrinsic apoptotic signaling pathway in response to osmotic stress;GO:0019228 neuronal action potential;GO:0086010 membrane depolarization during action potential		FDA approved drug targets:Small molecule drugs; Disease related genes; Transporters:Transporter channels and pores; Voltage-gated ion channels:Voltage-Gated Sodium Channels		Tramadol; Phenytoin; Propofol; Zonisamide; Tetrodotoxin; Metergoline; Amylmetacresol			0.0	0.0	0.0	0.0	0.0	0.0	0.0	0.0	0.0	0.0	0.0	0.0	0.0	0.0	0.0	0.0	0.0	0.0	0.0	0.0
CDHR3	222256	symbol	H. sapiens	222256	H. sapiens	CDHR3	cadherin related family member 3	GO:0016339 calcium-dependent cell-cell adhesion via plasma membrane cell adhesion molecules;GO:0034332 adherens junction organization;GO:0046718 viral entry into host cell		Predicted intracellular proteins; Disease related genes	Nucleoli fibrillar center (Approved)				0.0	0.0	0.0	0.0	0.0	0.0	0.0	0.0	0.0	0.0	0.0	0.0	0.0	0.0	0.0	0.0	0.0	0.0	0.0	0.0
TXLNG	55787	symbol	H. sapiens	55787	H. sapiens	TXLNG	taxilin gamma	GO:0030500 regulation of bone mineralization;GO:0070167 regulation of biomineral tissue development;GO:0110149 regulation of biomineralization		Predicted intracellular proteins	Cytosol (Approved)		(M65)PID FRA PATHWAY		0.0	0.0	0.0	0.0	0.0	0.0	0.0	0.0	0.0	0.0	0.0	0.0	0.0	0.0	0.0	0.0	0.0	0.0	0.0	0.0
APBB1IP	54518	symbol	H. sapiens	54518	H. sapiens	APBB1IP	amyloid beta precursor protein binding family B member 1 interacting protein	GO:0002291 T cell activation via T cell receptor contact with antigen bound to MHC molecule on antigen presenting cell;GO:0002286 T cell activation involved in immune response;GO:0002285 lymphocyte activation involved in immune response		Predicted intracellular proteins	Cytosol;Plasma membrane (Enhanced)				0.0	0.0	0.0	0.0	0.0	0.0	0.0	0.0	0.0	0.0	0.0	0.0	0.0	0.0	0.0	0.0	0.0	0.0	0.0	0.0
TMEM67	91147	symbol	H. sapiens	91147	H. sapiens	TMEM67	transmembrane protein 67	GO:0010826 negative regulation of centrosome duplication;GO:0046606 negative regulation of centrosome cycle;GO:0010824 regulation of centrosome duplication		Transporters; Potential drug targets; Disease related genes; Predicted intracellular proteins					0.0	0.0	1.0	0.0	0.0	0.0	0.0	0.0	0.0	0.0	1.0	1.0	0.0	0.0	1.0	0.0	0.0	0.0	0.0	0.0
TIMM9	26520	symbol	H. sapiens	26520	H. sapiens	TIMM9	translocase of inner mitochondrial membrane 9	GO:0045039 protein insertion into mitochondrial inner membrane;GO:0051204 protein insertion into mitochondrial membrane;GO:0090151 establishment of protein localization to mitochondrial membrane		Predicted intracellular proteins	Mitochondria (Supported)			(M5936)HALLMARK OXIDATIVE PHOSPHORYLATION	0.0	0.0	0.0	0.0	0.0	0.0	1.0	0.0	0.0	0.0	0.0	0.0	0.0	0.0	0.0	0.0	0.0	0.0	0.0	0.0
ZADH2	284273	symbol	H. sapiens	284273	H. sapiens	ZADH2	zinc binding alcohol dehydrogenase domain containing 2	GO:0006692 prostanoid metabolic process;GO:0006693 prostaglandin metabolic process;GO:0045599 negative regulation of fat cell differentiation		ENZYME proteins:Oxidoreductases; Predicted intracellular proteins; Enzymes	Vesicles (Approved); Additional: Golgi apparatus;Nucleoplasm				0.0	0.0	0.0	0.0	0.0	0.0	0.0	0.0	0.0	0.0	0.0	0.0	0.0	0.0	0.0	0.0	0.0	0.0	0.0	0.0
HPS4	89781	symbol	H. sapiens	89781	H. sapiens	HPS4	HPS4 biogenesis of lysosomal organelles complex 3 subunit 2	GO:0048075 positive regulation of eye pigmentation;GO:0048073 regulation of eye pigmentation;GO:1903232 melanosome assembly		Predicted intracellular proteins; Disease related genes	Centrosome (Approved)				0.0	0.0	0.0	0.0	0.0	0.0	1.0	0.0	0.0	0.0	0.0	0.0	0.0	0.0	0.0	0.0	0.0	0.0	0.0	0.0
FAM98B	283742	symbol	H. sapiens	283742	H. sapiens	FAM98B	family with sequence similarity 98 member B	GO:0006479 protein methylation;GO:0008213 protein alkylation;GO:0043414 macromolecule methylation		Predicted intracellular proteins	Nucleoplasm;Vesicles (Supported)				1.0	0.0	0.0	0.0	0.0	0.0	0.0	0.0	0.0	1.0	0.0	0.0	0.0	0.0	0.0	0.0	0.0	0.0	0.0	0.0
JRKL	8690	symbol	H. sapiens	8690	H. sapiens	JRKL	JRK like	GO:0007417 central nervous system development;GO:0007399 nervous system development;GO:0048731 system development		Predicted intracellular proteins	Nucleoplasm (Approved); Additional: Cytokinetic bridge				0.0	0.0	0.0	0.0	0.0	0.0	0.0	0.0	0.0	0.0	0.0	0.0	0.0	0.0	0.0	0.0	0.0	0.0	0.0	0.0
CACNA2D4	93589	symbol	H. sapiens	93589	H. sapiens	CACNA2D4	calcium voltage-gated channel auxiliary subunit alpha2delta 4	GO:0050908 detection of light stimulus involved in visual perception;GO:0050962 detection of light stimulus involved in sensory perception;GO:0009584 detection of visible light		Predicted intracellular proteins; Disease related genes					0.0	0.0	0.0	0.0	0.0	0.0	0.0	0.0	0.0	0.0	0.0	0.0	0.0	0.0	0.0	0.0	0.0	0.0	0.0	0.0
GANC	2595	symbol	H. sapiens	2595	H. sapiens	GANC	glucosidase alpha, neutral C	GO:0000023 maltose metabolic process;GO:0005984 disaccharide metabolic process;GO:0006491 N-glycan processing		FDA approved drug targets:Small molecule drugs; Predicted intracellular proteins; Enzymes; ENZYME proteins:Hydrolases	Cytosol (Approved)	Miglitol			0.0	0.0	0.0	0.0	0.0	0.0	0.0	0.0	0.0	0.0	0.0	0.0	0.0	0.0	0.0	0.0	0.0	0.0	0.0	0.0
FGFR1OP	11116	gene_synonym	H. sapiens	11116	H. sapiens	CEP43	centrosomal protein 43	GO:0034453 microtubule anchoring;GO:0061099 negative regulation of protein tyrosine kinase activity;GO:0050732 negative regulation of peptidyl-tyrosine phosphorylation		Predicted intracellular proteins; Disease related genes; Cancer-related genes	Centrosome (Supported)				0.0	0.0	1.0	1.0	0.0	0.0	0.0	0.0	0.0	0.0	0.0	1.0	0.0	0.0	0.0	0.0	0.0	0.0	0.0	0.0
ACSS3	79611	symbol	H. sapiens	79611	H. sapiens	ACSS3	acyl-CoA synthetase short chain family member 3	GO:0046951 ketone body biosynthetic process;GO:0046950 cellular ketone body metabolic process;GO:1902224 ketone body metabolic process		ENZYME proteins:Ligase; Enzymes	Mitochondria (Supported)				0.0	0.0	0.0	0.0	0.0	0.0	0.0	0.0	0.0	0.0	0.0	0.0	0.0	0.0	0.0	0.0	0.0	0.0	0.0	0.0
C2orf74	339804	symbol	H. sapiens	339804	H. sapiens	C2orf74	chromosome 2 open reading frame 74			Predicted intracellular proteins	Centrosome (Approved)				0.0	0.0	0.0	0.0	0.0	0.0	0.0	0.0	0.0	0.0	0.0	0.0	0.0	0.0	0.0	0.0	0.0	0.0	0.0	0.0
DEK	7913	symbol	H. sapiens	7913	H. sapiens	DEK	DEK proto-oncogene	GO:2001032 regulation of double-strand break repair via nonhomologous end joining;GO:0006303 double-strand break repair via nonhomologous end joining;GO:2000779 regulation of double-strand break repair		Predicted intracellular proteins; Disease related genes; Cancer-related genes:Candidate cancer biomarkers	Nucleoplasm (Enhanced)			(M5925)HALLMARK E2F TARGETS; (M5926)HALLMARK MYC TARGETS V1	0.0	1.0	0.0	0.0	0.0	0.0	0.0	0.0	0.0	0.0	0.0	0.0	0.0	1.0	0.0	0.0	0.0	0.0	0.0	0.0
LINC00862	554279	symbol	H. sapiens	554279	H. sapiens	LINC00862	long intergenic non-protein coding RNA 862								0.0	0.0	0.0	0.0	0.0	0.0	0.0	0.0	0.0	0.0	0.0	0.0	0.0	0.0	0.0	0.0	0.0	0.0	0.0	0.0
VRK2	7444	symbol	H. sapiens	7444	H. sapiens	VRK2	VRK serine/threonine kinase 2	GO:2000659 regulation of interleukin-1-mediated signaling pathway;GO:0070498 interleukin-1-mediated signaling pathway;GO:0071347 cellular response to interleukin-1	CK1 Ser/Thr protein kinase family	Predicted intracellular proteins; Kinases:CK1 Ser/Thr protein kinases; Enzymes; ENZYME proteins:Transferases	Endoplasmic reticulum (Supported)				0.0	0.0	0.0	1.0	0.0	0.0	0.0	0.0	0.0	0.0	0.0	0.0	0.0	0.0	0.0	0.0	0.0	0.0	0.0	0.0
MUT	4594	gene_synonym	H. sapiens	4594	H. sapiens	MMUT	methylmalonyl-CoA mutase	GO:0050667 homocysteine metabolic process;GO:0000096 sulfur amino acid metabolic process;GO:0009791 post-embryonic development		Disease related genes; Predicted intracellular proteins; FDA approved drug targets:Small molecule drugs; ENZYME proteins:Isomerase; Enzymes	Cytosol (Approved); Additional: Mitochondria	Cyanocobalamin; Hydroxocobalamin			0.0	0.0	0.0	0.0	0.0	0.0	0.0	0.0	0.0	0.0	0.0	0.0	0.0	0.0	0.0	0.0	0.0	0.0	0.0	0.0
PEX3	8504	symbol	H. sapiens	8504	H. sapiens	PEX3	peroxisomal biogenesis factor 3	GO:0016557 peroxisome membrane biogenesis;GO:0045046 protein import into peroxisome membrane;GO:0006625 protein targeting to peroxisome		Transporters; Potential drug targets; Disease related genes	Nucleoplasm;Peroxisomes (Approved)				0.0	0.0	0.0	0.0	0.0	0.0	1.0	0.0	0.0	0.0	0.0	0.0	0.0	0.0	0.0	0.0	0.0	0.0	0.0	0.0
SLC9A9	285195	symbol	H. sapiens	285195	H. sapiens	SLC9A9	solute carrier family 9 member A9	GO:0098719 sodium ion import across plasma membrane;GO:0051453 regulation of intracellular pH;GO:0030641 regulation of cellular pH		Potential drug targets; Disease related genes; Transporters:Electrochemical Potential-driven transporters					0.0	0.0	0.0	0.0	0.0	0.0	0.0	0.0	0.0	0.0	0.0	0.0	0.0	0.0	0.0	0.0	0.0	0.0	0.0	0.0
HHIPL2	79802	symbol	H. sapiens	79802	H. sapiens	HHIPL2	HHIP like 2			Predicted secreted proteins	Mitochondria (Uncertain); Additional: Cytosol				0.0	0.0	0.0	0.0	0.0	0.0	0.0	0.0	0.0	0.0	0.0	0.0	0.0	0.0	0.0	0.0	0.0	0.0	0.0	0.0
USP33	23032	symbol	H. sapiens	23032	H. sapiens	USP33	ubiquitin specific peptidase 33	GO:0070536 protein K63-linked deubiquitination;GO:0071108 protein K48-linked deubiquitination;GO:0051298 centrosome duplication		Predicted intracellular proteins; Peptidases:Cysteine-type peptidases; Enzymes; ENZYME proteins:Hydrolases	Golgi apparatus;Nucleoplasm (Supported)				0.0	0.0	0.0	0.0	0.0	0.0	0.0	0.0	0.0	0.0	1.0	1.0	0.0	0.0	1.0	0.0	0.0	0.0	0.0	0.0
ELL3	80237	symbol	H. sapiens	80237	H. sapiens	ELL3	elongation factor for RNA polymerase II 3	GO:1902166 negative regulation of intrinsic apoptotic signaling pathway in response to DNA damage by p53 class mediator;GO:1902165 regulation of intrinsic apoptotic signaling pathway in response to DNA damage by p53 class mediator;GO:0042795 snRNA transcription by RNA polymerase II		Predicted intracellular proteins	Nucleoli;Nucleoplasm (Supported); Additional: Mitotic chromosome				0.0	1.0	0.0	0.0	0.0	0.0	0.0	0.0	0.0	0.0	0.0	0.0	0.0	0.0	0.0	1.0	0.0	0.0	0.0	0.0
KRR1	11103	symbol	H. sapiens	11103	H. sapiens	KRR1	KRR1 small subunit processome component homolog	GO:0006364 rRNA processing;GO:0016072 rRNA metabolic process;GO:0042254 ribosome biogenesis		Predicted intracellular proteins	Nucleoli;Nucleoli rim (Enhanced); Additional: Mitotic chromosome;Nucleoplasm				1.0	0.0	0.0	0.0	0.0	0.0	0.0	0.0	0.0	0.0	0.0	0.0	0.0	0.0	0.0	0.0	0.0	0.0	0.0	0.0
SYCP2	10388	symbol	H. sapiens	10388	H. sapiens	SYCP2	synaptonemal complex protein 2	GO:0000080 mitotic G1 phase;GO:0022403 cell cycle phase;GO:0051318 G1 phase		Predicted intracellular proteins	Nucleoplasm (Supported); Additional: Cytosol;Plasma membrane				0.0	0.0	0.0	1.0	0.0	0.0	0.0	0.0	0.0	0.0	0.0	0.0	0.0	0.0	0.0	1.0	0.0	1.0	0.0	0.0
ZNF596	169270	symbol	H. sapiens	169270	H. sapiens	ZNF596	zinc finger protein 596	GO:0000122 negative regulation of transcription by RNA polymerase II;GO:0045892 negative regulation of transcription, DNA-templated;GO:1903507 negative regulation of nucleic acid-templated transcription		Transcription factors:Zinc-coordinating DNA-binding domains; Predicted intracellular proteins	Mitochondria;Nucleoli (Approved)				0.0	0.0	0.0	0.0	0.0	0.0	0.0	0.0	0.0	0.0	0.0	0.0	0.0	0.0	0.0	0.0	0.0	0.0	0.0	0.0
TUBD1	51174	symbol	H. sapiens	51174	H. sapiens	TUBD1	tubulin delta 1	GO:0045880 positive regulation of smoothened signaling pathway;GO:0008589 regulation of smoothened signaling pathway;GO:0007224 smoothened signaling pathway		FDA approved drug targets:Small molecule drugs; Predicted intracellular proteins	Cytosol;Nucleoplasm (Enhanced)	Vinblastine		(M5893)HALLMARK MITOTIC SPINDLE	0.0	0.0	1.0	0.0	0.0	0.0	0.0	0.0	0.0	0.0	0.0	1.0	0.0	0.0	0.0	0.0	0.0	0.0	0.0	0.0
ZC3H13	23091	symbol	H. sapiens	23091	H. sapiens	ZC3H13	zinc finger CCCH-type containing 13	GO:0080009 mRNA methylation;GO:0016556 mRNA modification;GO:2000036 regulation of stem cell population maintenance		Predicted intracellular proteins	Actin filaments;Nuclear membrane (Approved)				1.0	0.0	0.0	0.0	0.0	0.0	0.0	0.0	0.0	1.0	0.0	0.0	0.0	0.0	0.0	0.0	0.0	0.0	0.0	0.0
PPP1CC	5501	symbol	H. sapiens	5501	H. sapiens	PPP1CC	protein phosphatase 1 catalytic subunit gamma	GO:0060252 positive regulation of glial cell proliferation;GO:0043153 entrainment of circadian clock by photoperiod;GO:0009648 photoperiodism		Predicted intracellular proteins; Enzymes; ENZYME proteins:Hydrolases		9,10-Deepithio-9,10-Didehydroacanthifolicin; Calyculin A; Motuporin	(M247)PID INSULIN GLUCOSE PATHWAY; (M14)PID AURORA B PATHWAY		0.0	0.0	0.0	1.0	0.0	0.0	1.0	0.0	0.0	0.0	0.0	0.0	0.0	0.0	0.0	0.0	0.0	0.0	0.0	1.0
RSRC2	65117	symbol	H. sapiens	65117	H. sapiens	RSRC2	arginine and serine rich coiled-coil 2			Predicted intracellular proteins	Nuclear speckles (Approved); Additional: Cytosol;Nucleoli fibrillar center				0.0	0.0	0.0	0.0	0.0	0.0	0.0	0.0	0.0	0.0	0.0	0.0	0.0	0.0	0.0	0.0	0.0	0.0	0.0	0.0
MAPKAPK5	8550	symbol	H. sapiens	8550	H. sapiens	MAPKAPK5	MAPK activated protein kinase 5	GO:0090400 stress-induced premature senescence;GO:1904355 positive regulation of telomere capping;GO:1904353 regulation of telomere capping	CAMK Ser/Thr protein kinase family	Kinases:CAMK Ser/Thr protein kinases; Predicted intracellular proteins; Enzymes; ENZYME proteins:Transferases	Cytosol;Nucleoplasm (Supported)	Fostamatinib	(M12705)SIG CD40PATHWAYMAP; (M229)PID P38 ALPHA BETA DOWNSTREAM PATHWAY		0.0	0.0	0.0	0.0	0.0	0.0	0.0	1.0	1.0	0.0	0.0	0.0	0.0	1.0	0.0	0.0	0.0	0.0	0.0	1.0
WDR17	116966	symbol	H. sapiens	116966	H. sapiens	WDR17	WD repeat domain 17			Predicted intracellular proteins	Nuclear speckles (Approved)				0.0	0.0	0.0	0.0	0.0	0.0	0.0	0.0	0.0	0.0	0.0	0.0	0.0	0.0	0.0	0.0	0.0	0.0	0.0	0.0
ERO1A	30001	symbol	H. sapiens	30001	H. sapiens	ERO1A	endoplasmic reticulum oxidoreductase 1 alpha	GO:0010260 animal organ senescence;GO:0022417 protein maturation by protein folding;GO:0018401 peptidyl-proline hydroxylation to 4-hydroxy-L-proline		Predicted intracellular proteins				(M5922)HALLMARK UNFOLDED PROTEIN RESPONSE; (M5891)HALLMARK HYPOXIA; (M5924)HALLMARK MTORC1 SIGNALING	0.0	0.0	0.0	0.0	0.0	0.0	0.0	0.0	0.0	0.0	0.0	0.0	0.0	0.0	0.0	0.0	0.0	0.0	0.0	1.0
MRPL48	51642	symbol	H. sapiens	51642	H. sapiens	MRPL48	mitochondrial ribosomal protein L48			Ribosomal proteins; Predicted intracellular proteins	Mitochondria (Supported)				0.0	0.0	0.0	0.0	0.0	0.0	0.0	0.0	0.0	0.0	0.0	0.0	0.0	0.0	0.0	0.0	0.0	0.0	0.0	0.0
10-Sep						None	None	None	None	None	None	None	None	None	nan	nan	nan	nan	nan	nan	nan	nan	nan	nan	nan	nan	nan	nan	nan	nan	nan	nan	nan	nan
TXNIP	10628	symbol	H. sapiens	10628	H. sapiens	TXNIP	thioredoxin interacting protein	GO:0071228 cellular response to tumor cell;GO:0051782 negative regulation of cell division;GO:0032570 response to progesterone		Cancer-related genes:Mutational cancer driver genes; Predicted intracellular proteins	Plasma membrane (Approved); Additional: Cytosol			(M5911)HALLMARK INTERFERON ALPHA RESPONSE; (M5902)HALLMARK APOPTOSIS; (M5913)HALLMARK INTERFERON GAMMA RESPONSE	0.0	0.0	0.0	1.0	0.0	0.0	1.0	0.0	0.0	0.0	0.0	0.0	0.0	0.0	0.0	0.0	0.0	0.0	0.0	1.0
CDC27	996	symbol	H. sapiens	996	H. sapiens	CDC27	cell division cycle 27	GO:0045842 positive regulation of mitotic metaphase/anaphase transition;GO:1901970 positive regulation of mitotic sister chromatid separation;GO:1902101 positive regulation of metaphase/anaphase transition of cell cycle		Cancer-related genes:Mutated cancer genes; Predicted intracellular proteins	Nucleoplasm (Enhanced)			(M5893)HALLMARK MITOTIC SPINDLE; (M5901)HALLMARK G2M CHECKPOINT; (M5945)HALLMARK HEME METABOLISM	0.0	0.0	0.0	1.0	0.0	0.0	0.0	1.0	0.0	0.0	1.0	0.0	0.0	1.0	0.0	0.0	0.0	1.0	0.0	0.0
S1PR3	1903	symbol	H. sapiens	1903	H. sapiens	S1PR3	sphingosine-1-phosphate receptor 3	GO:1901551 negative regulation of endothelial cell development;GO:1903141 negative regulation of establishment of endothelial barrier;GO:0045602 negative regulation of endothelial cell differentiation		G-protein coupled receptors:GPCRs excl olfactory receptors; G-protein coupled receptors:Lysolipids receptors		Fingolimod	(M155)PID S1P META PATHWAY; (M55)PID S1P S1P3 PATHWAY		0.0	0.0	0.0	0.0	0.0	0.0	0.0	0.0	0.0	0.0	0.0	0.0	0.0	0.0	0.0	0.0	0.0	0.0	0.0	0.0
PCYOX1	51449	symbol	H. sapiens	51449	H. sapiens	PCYOX1	prenylcysteine oxidase 1	GO:0030328 prenylcysteine catabolic process;GO:0030329 prenylcysteine metabolic process;GO:0030327 prenylated protein catabolic process		ENZYME proteins:Oxidoreductases; Predicted intracellular proteins; Enzymes					0.0	0.0	0.0	0.0	0.0	0.0	0.0	0.0	0.0	0.0	1.0	0.0	0.0	0.0	0.0	0.0	0.0	0.0	0.0	0.0
STS	412	symbol	H. sapiens	412	H. sapiens	STS	steroid sulfatase	GO:0006706 steroid catabolic process;GO:0007565 female pregnancy;GO:0044706 multi-multicellular organism process		Potential drug targets; Disease related genes; Enzymes; ENZYME proteins:Hydrolases		Irosustat; 2-Amino-3-Oxo-4-Sulfo-Butyric Acid		(M5949)HALLMARK PEROXISOME	0.0	0.0	0.0	0.0	0.0	0.0	0.0	0.0	1.0	0.0	0.0	0.0	0.0	0.0	0.0	0.0	0.0	0.0	0.0	0.0
TMEM260	54916	symbol	H. sapiens	54916	H. sapiens	TMEM260	transmembrane protein 260			Predicted intracellular proteins; Disease related genes	Cytosol;Nucleoplasm (Approved); Additional: Focal adhesion sites				0.0	0.0	0.0	0.0	0.0	0.0	0.0	0.0	0.0	0.0	0.0	0.0	0.0	0.0	0.0	0.0	0.0	0.0	0.0	0.0
DDX26B	203522	gene_synonym	H. sapiens	203522	H. sapiens	INTS6L	integrator complex subunit 6 like	GO:0034472 snRNA 3'-end processing;GO:0016180 snRNA processing;GO:0016073 snRNA metabolic process		Predicted intracellular proteins	Centrosome (Approved); Additional: Mitochondria;Nuclear bodies		(M3008)NABA ECM GLYCOPROTEINS; (M5884)NABA CORE MATRISOME; (M5889)NABA MATRISOME		0.0	0.0	0.0	0.0	1.0	0.0	0.0	0.0	0.0	0.0	0.0	0.0	0.0	0.0	0.0	0.0	0.0	0.0	0.0	0.0
CASC2	255082	symbol	H. sapiens	255082	H. sapiens	CASC2	cancer susceptibility 2	GO:0002357 defense response to tumor cell;GO:0002347 response to tumor cell;GO:0043280 positive regulation of cysteine-type endopeptidase activity involved in apoptotic process							0.0	0.0	0.0	0.0	0.0	0.0	0.0	0.0	0.0	0.0	0.0	0.0	0.0	0.0	0.0	0.0	0.0	0.0	0.0	0.0
EPHX2	2053	symbol	H. sapiens	2053	H. sapiens	EPHX2	epoxide hydrolase 2	GO:0009810 stilbene metabolic process;GO:0046272 stilbene catabolic process;GO:0120256 olefinic compound catabolic process		Predicted intracellular proteins; Enzymes; ENZYME proteins:Hydrolases	Cytosol (Enhanced)	N-Cyclohexyl-N'-(4-Iodophenyl)Urea; N-Cyclohexyl-N'-Decylurea; N-Cyclohexyl-N'-(Propyl)Phenyl Urea; AR-9281; N-[(CYCLOHEXYLAMINO)CARBONYL]GLYCINE; 4-{[(CYCLOHEXYLAMINO)CARBONYL]AMINO}BUTANOIC ACID; 6-{[(CYCLOHEXYLAMINO)CARBONYL]AMINO}HEXANOIC ACID; 7-{[(CYCLOHEXYLAMINO)CARBONYL]AMINO}HEPTANOIC ACID; Ebselen		(M5949)HALLMARK PEROXISOME; (M5948)HALLMARK BILE ACID METABOLISM; (M5905)HALLMARK ADIPOGENESIS	0.0	0.0	0.0	0.0	0.0	0.0	0.0	0.0	1.0	0.0	0.0	0.0	0.0	0.0	0.0	0.0	0.0	0.0	0.0	0.0
ZNF223	7766	symbol	H. sapiens	7766	H. sapiens	ZNF223	zinc finger protein 223	GO:0006357 regulation of transcription by RNA polymerase II;GO:0006366 transcription by RNA polymerase II;GO:0006355 regulation of transcription, DNA-templated		Transcription factors:Zinc-coordinating DNA-binding domains; Predicted intracellular proteins	Nucleoplasm (Approved); Additional: Mitochondria				0.0	0.0	0.0	0.0	0.0	0.0	0.0	0.0	0.0	0.0	0.0	0.0	0.0	0.0	0.0	0.0	0.0	0.0	0.0	0.0
USP39	10713	symbol	H. sapiens	10713	H. sapiens	USP39	ubiquitin specific peptidase 39	GO:0000245 spliceosomal complex assembly;GO:0016579 protein deubiquitination;GO:0070646 protein modification by small protein removal		Predicted intracellular proteins; Enzymes; Peptidases:Cysteine-type peptidases	Nucleoplasm (Supported)				1.0	0.0	0.0	1.0	0.0	0.0	0.0	0.0	0.0	0.0	0.0	0.0	0.0	0.0	0.0	0.0	0.0	0.0	0.0	0.0
PAXBP1	94104	symbol	H. sapiens	94104	H. sapiens	PAXBP1	PAX3 and PAX7 binding protein 1	GO:2000288 positive regulation of myoblast proliferation;GO:0014842 regulation of skeletal muscle satellite cell proliferation;GO:0014841 skeletal muscle satellite cell proliferation		Predicted intracellular proteins	Nucleoplasm (Approved); Additional: Cytosol				1.0	0.0	0.0	0.0	0.0	1.0	0.0	0.0	0.0	1.0	0.0	0.0	0.0	0.0	0.0	0.0	0.0	0.0	0.0	0.0
P2RX7	5027	symbol	H. sapiens	5027	H. sapiens	P2RX7	purinergic receptor P2X 7	GO:1904170 regulation of bleb assembly;GO:1904172 positive regulation of bleb assembly;GO:0035585 calcium-mediated signaling using extracellular calcium source		Transporters:Transporter channels and pores				(M5932)HALLMARK INFLAMMATORY RESPONSE	0.0	0.0	1.0	0.0	0.0	0.0	0.0	1.0	1.0	0.0	0.0	0.0	0.0	0.0	0.0	0.0	0.0	0.0	0.0	1.0
FAM104B	90736	symbol	H. sapiens	90736	H. sapiens	FAM104B	family with sequence similarity 104 member B			Predicted intracellular proteins					0.0	0.0	0.0	0.0	0.0	0.0	0.0	0.0	0.0	0.0	0.0	0.0	0.0	0.0	0.0	0.0	0.0	0.0	0.0	0.0
DYNLRB2	83657	symbol	H. sapiens	83657	H. sapiens	DYNLRB2	dynein light chain roadblock-type 2	GO:0007018 microtubule-based movement;GO:0007017 microtubule-based process;GO:0006928 movement of cell or subcellular component		Predicted intracellular proteins					0.0	0.0	1.0	0.0	0.0	0.0	0.0	0.0	0.0	0.0	0.0	0.0	0.0	0.0	0.0	0.0	0.0	0.0	0.0	0.0
MIR5047	100616408	symbol	H. sapiens	100616408	H. sapiens	MIR5047	microRNA 5047								0.0	0.0	0.0	0.0	0.0	0.0	0.0	0.0	0.0	0.0	0.0	0.0	0.0	0.0	0.0	0.0	0.0	0.0	0.0	0.0
FCHO2	115548	symbol	H. sapiens	115548	H. sapiens	FCHO2	FCH and mu domain containing endocytic adaptor 2	GO:0048268 clathrin coat assembly;GO:0072583 clathrin-dependent endocytosis;GO:0048488 synaptic vesicle endocytosis		Predicted intracellular proteins	Centrosome (Approved); Additional: Cytosol;Vesicles				0.0	0.0	0.0	0.0	0.0	0.0	0.0	0.0	0.0	0.0	0.0	0.0	0.0	0.0	0.0	0.0	0.0	0.0	0.0	0.0
AASDH	132949	symbol	H. sapiens	132949	H. sapiens	AASDH	aminoadipate-semialdehyde dehydrogenase	GO:0043041 amino acid activation for nonribosomal peptide biosynthetic process;GO:0019482 beta-alanine metabolic process;GO:0019184 nonribosomal peptide biosynthetic process		Predicted intracellular proteins					0.0	0.0	0.0	0.0	0.0	0.0	0.0	0.0	1.0	0.0	0.0	0.0	0.0	0.0	0.0	0.0	0.0	0.0	0.0	0.0
LINC01358	101926925	symbol	H. sapiens	101926925	H. sapiens	LINC01358	long intergenic non-protein coding RNA 1358								0.0	0.0	0.0	0.0	0.0	0.0	0.0	0.0	0.0	0.0	0.0	0.0	0.0	0.0	0.0	0.0	0.0	0.0	0.0	0.0
PPARGC1A	10891	symbol	H. sapiens	10891	H. sapiens	PPARGC1A	PPARG coactivator 1 alpha	GO:0071250 cellular response to nitrite;GO:0080033 response to nitrite;GO:1901558 response to metformin		Predicted intracellular proteins; Cancer-related genes:Candidate cancer biomarkers	Nucleoplasm (Supported)		(M32)PID HDAC CLASSIII PATHWAY; (M229)PID P38 ALPHA BETA DOWNSTREAM PATHWAY; (M166)PID ATF2 PATHWAY	(M5891)HALLMARK HYPOXIA	1.0	0.0	1.0	0.0	0.0	1.0	0.0	1.0	0.0	1.0	0.0	0.0	0.0	1.0	0.0	0.0	1.0	1.0	0.0	1.0
CLGN	1047	symbol	H. sapiens	1047	H. sapiens	CLGN	calmegin	GO:0007339 binding of sperm to zona pellucida;GO:0035036 sperm-egg recognition;GO:0009988 cell-cell recognition		Predicted intracellular proteins	Endoplasmic reticulum (Supported)			(M5951)HALLMARK SPERMATOGENESIS	0.0	0.0	0.0	0.0	0.0	0.0	0.0	0.0	0.0	0.0	1.0	0.0	0.0	0.0	0.0	0.0	0.0	0.0	0.0	0.0
TBC1D5	9779	symbol	H. sapiens	9779	H. sapiens	TBC1D5	TBC1 domain family member 5	GO:0002092 positive regulation of receptor internalization;GO:0048260 positive regulation of receptor-mediated endocytosis;GO:0002090 regulation of receptor internalization		Predicted intracellular proteins	Vesicles (Supported); Additional: Golgi apparatus				0.0	0.0	1.0	0.0	0.0	0.0	0.0	0.0	0.0	0.0	0.0	0.0	0.0	0.0	1.0	0.0	0.0	0.0	0.0	0.0
ZNF594	84622	symbol	H. sapiens	84622	H. sapiens	ZNF594	zinc finger protein 594	GO:0045944 positive regulation of transcription by RNA polymerase II;GO:0045893 positive regulation of transcription, DNA-templated;GO:1903508 positive regulation of nucleic acid-templated transcription		Transcription factors:Zinc-coordinating DNA-binding domains; Predicted intracellular proteins	Nucleoplasm (Enhanced)				0.0	0.0	0.0	0.0	0.0	0.0	0.0	0.0	0.0	0.0	0.0	0.0	0.0	0.0	0.0	0.0	0.0	0.0	0.0	0.0
ZBED6CL	113763	gene_synonym	H. sapiens	113763	H. sapiens	ZBED10P	zinc finger BED-type containing 10, pseudogene			Predicted intracellular proteins	Nuclear membrane (Approved); Additional: Vesicles				0.0	0.0	0.0	0.0	0.0	0.0	0.0	0.0	0.0	0.0	0.0	0.0	0.0	0.0	0.0	0.0	0.0	0.0	0.0	0.0
ABCB4	5244	symbol	H. sapiens	5244	H. sapiens	ABCB4	ATP binding cassette subfamily B member 4	GO:1901557 response to fenofibrate;GO:0099040 ceramide translocation;GO:0099039 sphingolipid translocation		Disease related genes; Predicted intracellular proteins; Transporters:Primary Active Transporters; Potential drug targets; ENZYME proteins:Hydrolases; Enzymes	Actin filaments;Nucleoplasm;Plasma membrane (Approved); Additional: Focal adhesion sites			(M5949)HALLMARK PEROXISOME	0.0	0.0	0.0	0.0	0.0	0.0	0.0	0.0	0.0	0.0	0.0	0.0	0.0	0.0	0.0	0.0	1.0	0.0	0.0	0.0
EPB41L4A	64097	symbol	H. sapiens	64097	H. sapiens	EPB41L4A	erythrocyte membrane protein band 4.1 like 4A	GO:0031032 actomyosin structure organization;GO:0030036 actin cytoskeleton organization;GO:0030029 actin filament-based process		Predicted intracellular proteins	Plasma membrane (Approved); Additional: Nucleoplasm				0.0	0.0	0.0	0.0	0.0	0.0	0.0	0.0	0.0	0.0	0.0	0.0	0.0	0.0	0.0	0.0	0.0	0.0	0.0	0.0
ZNF528	84436	symbol	H. sapiens	84436	H. sapiens	ZNF528	zinc finger protein 528	GO:0006357 regulation of transcription by RNA polymerase II;GO:0006366 transcription by RNA polymerase II;GO:0006355 regulation of transcription, DNA-templated		Transcription factors:Zinc-coordinating DNA-binding domains; Predicted intracellular proteins	Nuclear speckles (Approved); Additional: Cytosol				0.0	0.0	0.0	0.0	0.0	0.0	0.0	0.0	0.0	0.0	0.0	0.0	0.0	0.0	0.0	0.0	0.0	0.0	0.0	0.0
DMC1	11144	symbol	H. sapiens	11144	H. sapiens	DMC1	DNA meiotic recombinase 1	GO:0000730 DNA recombinase assembly;GO:0090735 DNA repair complex assembly;GO:0042148 strand invasion		Predicted intracellular proteins	Nucleoplasm (Approved)	Imidazole		(M5951)HALLMARK SPERMATOGENESIS	0.0	1.0	0.0	1.0	0.0	0.0	0.0	0.0	0.0	0.0	0.0	0.0	0.0	0.0	0.0	1.0	0.0	1.0	0.0	0.0
MCTS1	28985	symbol	H. sapiens	28985	H. sapiens	MCTS1	MCTS1 re-initiation and release factor	GO:0002188 translation reinitiation;GO:0032790 ribosome disassembly;GO:0001731 formation of translation preinitiation complex		Predicted intracellular proteins	Cytosol (Supported); Additional: Plasma membrane				0.0	1.0	0.0	0.0	0.0	0.0	0.0	0.0	1.0	0.0	0.0	0.0	0.0	0.0	0.0	0.0	0.0	0.0	0.0	0.0
MIR4697HG	22997	gene_synonym	H. sapiens	22997	H. sapiens	IGSF9B	immunoglobulin superfamily member 9B	GO:0007155 cell adhesion;GO:0022610 biological adhesion;GO:0007399 nervous system development		Predicted intracellular proteins	Cytosol (Approved)				0.0	0.0	0.0	0.0	0.0	0.0	0.0	0.0	0.0	0.0	0.0	0.0	0.0	0.0	0.0	0.0	0.0	0.0	0.0	0.0
CADM3	57863	symbol	H. sapiens	57863	H. sapiens	CADM3	cell adhesion molecule 3	GO:0007157 heterophilic cell-cell adhesion via plasma membrane cell adhesion molecules;GO:0007156 homophilic cell adhesion via plasma membrane adhesion molecules;GO:0098742 cell-cell adhesion via plasma-membrane adhesion molecules		Predicted intracellular proteins	Cytosol (Approved)			(M5915)HALLMARK APICAL JUNCTION	0.0	0.0	0.0	0.0	0.0	0.0	0.0	0.0	0.0	0.0	0.0	0.0	0.0	0.0	0.0	0.0	0.0	0.0	0.0	0.0
KIAA0586	9786	symbol	H. sapiens	9786	H. sapiens	KIAA0586	KIAA0586	GO:0007224 smoothened signaling pathway;GO:0060271 cilium assembly;GO:0044782 cilium organization		Predicted intracellular proteins; Disease related genes	Nucleoplasm (Approved); Additional: Cytosol				0.0	0.0	1.0	0.0	0.0	0.0	0.0	0.0	0.0	0.0	0.0	0.0	0.0	0.0	0.0	0.0	0.0	0.0	0.0	0.0
ZNF37A	7587	symbol	H. sapiens	7587	H. sapiens	ZNF37A	zinc finger protein 37A	GO:0006357 regulation of transcription by RNA polymerase II;GO:0006366 transcription by RNA polymerase II;GO:0006355 regulation of transcription, DNA-templated		Transcription factors:Zinc-coordinating DNA-binding domains; Predicted intracellular proteins	Vesicles (Approved)				0.0	0.0	0.0	0.0	0.0	0.0	0.0	0.0	0.0	0.0	0.0	0.0	0.0	0.0	0.0	0.0	0.0	0.0	0.0	0.0
NUCB2	4925	symbol	H. sapiens	4925	H. sapiens	NUCB2	nucleobindin 2	GO:0032096 negative regulation of response to food;GO:0032099 negative regulation of appetite;GO:0032105 negative regulation of response to extracellular stimulus		Predicted intracellular proteins; Predicted secreted proteins	Golgi apparatus (Enhanced)	Calcium citrate; Calcium Phosphate; Calcium phosphate dihydrate			0.0	0.0	0.0	0.0	0.0	0.0	0.0	0.0	0.0	0.0	0.0	0.0	0.0	0.0	0.0	0.0	0.0	0.0	0.0	0.0
DENND2D	79961	symbol	H. sapiens	79961	H. sapiens	DENND2D	DENN domain containing 2D	GO:0050790 regulation of catalytic activity;GO:0065009 regulation of molecular function;GO:0065007 biological regulation		Predicted intracellular proteins	Cytosol;Nucleoplasm (Approved)				0.0	0.0	0.0	0.0	0.0	0.0	0.0	0.0	0.0	0.0	0.0	0.0	0.0	0.0	0.0	0.0	0.0	0.0	0.0	0.0
HSP90B1	7184	symbol	H. sapiens	7184	H. sapiens	HSP90B1	heat shock protein 90 beta family member 1	GO:0031247 actin rod assembly;GO:0034975 protein folding in endoplasmic reticulum;GO:0071318 cellular response to ATP		Predicted intracellular proteins; Cancer-related genes:Candidate cancer biomarkers	Endoplasmic reticulum (Enhanced)	Rifabutin; 2-Chlorodideoxyadenosine; Geldanamycin; Diglyme; N-Ethyl-5'-Carboxamido Adenosine; Radicicol; METHYL 3-CHLORO-2-{3-[(2,5-DIHYDROXY-4-METHOXYPHENYL)AMINO]-3-OXOPROPYL}-4,6-DIHYDROXYBENZOATE; 2-(3-AMINO-2,5,6-TRIMETHOXYPHENYL)ETHYL 5-CHLORO-2,4-DIHYDROXYBENZOATE; Copper	(M183)PID IL6 7 PATHWAY	(M5923)HALLMARK PI3K AKT MTOR SIGNALING; (M5922)HALLMARK UNFOLDED PROTEIN RESPONSE; (M5924)HALLMARK MTORC1 SIGNALING	0.0	0.0	0.0	0.0	0.0	0.0	0.0	0.0	0.0	0.0	1.0	0.0	0.0	0.0	0.0	0.0	0.0	0.0	0.0	1.0
ZNF395	55893	symbol	H. sapiens	55893	H. sapiens	ZNF395	zinc finger protein 395	GO:0045944 positive regulation of transcription by RNA polymerase II;GO:0045893 positive regulation of transcription, DNA-templated;GO:1903508 positive regulation of nucleic acid-templated transcription		Predicted intracellular proteins	Nucleoplasm (Supported); Additional: Cytosol				0.0	0.0	0.0	0.0	0.0	0.0	0.0	0.0	0.0	0.0	0.0	0.0	0.0	0.0	0.0	0.0	0.0	0.0	0.0	0.0
NFATC2IP	84901	symbol	H. sapiens	84901	H. sapiens	NFATC2IP	nuclear factor of activated T cells 2 interacting protein	GO:0001816 cytokine production;GO:0045944 positive regulation of transcription by RNA polymerase II;GO:0045893 positive regulation of transcription, DNA-templated		Predicted intracellular proteins	Nucleoplasm (Approved)				0.0	0.0	0.0	0.0	0.0	0.0	0.0	0.0	0.0	0.0	0.0	0.0	0.0	0.0	0.0	0.0	0.0	0.0	0.0	0.0
CDKL3	51265	symbol	H. sapiens	51265	H. sapiens	CDKL3	cyclin dependent kinase like 3	GO:0050775 positive regulation of dendrite morphogenesis;GO:0097484 dendrite extension;GO:0030517 negative regulation of axon extension	CMGC Ser/Thr protein kinase family	Kinases:CMGC Ser/Thr protein kinases; Predicted intracellular proteins; Enzymes; ENZYME proteins:Transferases	Nucleoplasm;Vesicles (Uncertain)				0.0	0.0	0.0	0.0	0.0	0.0	0.0	0.0	0.0	0.0	0.0	0.0	0.0	0.0	0.0	0.0	0.0	0.0	0.0	0.0
DSCR3	10311	gene_synonym	H. sapiens	10311	H. sapiens	VPS26C	VPS26 endosomal protein sorting factor C	GO:0032456 endocytic recycling;GO:0098876 vesicle-mediated transport to the plasma membrane;GO:0016197 endosomal transport		Predicted intracellular proteins	Mitochondria (Approved)				0.0	0.0	0.0	0.0	0.0	0.0	0.0	0.0	0.0	0.0	0.0	0.0	0.0	0.0	0.0	0.0	0.0	0.0	0.0	0.0
AP4B1-AS1	100287722	symbol	H. sapiens	100287722	H. sapiens	AP4B1-AS1	AP4B1 antisense RNA 1								0.0	0.0	0.0	0.0	0.0	0.0	0.0	0.0	0.0	0.0	0.0	0.0	0.0	0.0	0.0	0.0	0.0	0.0	0.0	0.0
NAPEPLD	222236	symbol	H. sapiens	222236	H. sapiens	NAPEPLD	N-acyl phosphatidylethanolamine phospholipase D	GO:1903999 negative regulation of eating behavior;GO:0048874 host-mediated regulation of intestinal microbiota composition;GO:0070291 N-acylethanolamine metabolic process		Predicted intracellular proteins; Enzymes; ENZYME proteins:Hydrolases	Cytosol (Approved)	Medical Cannabis			0.0	0.0	0.0	0.0	0.0	0.0	0.0	0.0	0.0	0.0	0.0	0.0	0.0	0.0	0.0	0.0	0.0	0.0	0.0	1.0
TMEM254	80195	symbol	H. sapiens	80195	H. sapiens	TMEM254	transmembrane protein 254				Plasma membrane (Approved); Additional: Nucleoplasm				0.0	0.0	0.0	0.0	0.0	0.0	0.0	0.0	0.0	0.0	0.0	0.0	0.0	0.0	0.0	0.0	0.0	0.0	0.0	0.0
STK36	27148	symbol	H. sapiens	27148	H. sapiens	STK36	serine/threonine kinase 36	GO:0007227 signal transduction downstream of smoothened;GO:0007228 positive regulation of hh target transcription factor activity;GO:0003351 epithelial cilium movement involved in extracellular fluid movement	Other	Predicted intracellular proteins; Enzymes; Kinases; ENZYME proteins:Transferases	Cytosol (Supported)	Fostamatinib	(M219)PID HEDGEHOG GLI PATHWAY		0.0	0.0	1.0	0.0	0.0	0.0	0.0	0.0	0.0	0.0	0.0	0.0	0.0	0.0	0.0	0.0	0.0	0.0	0.0	0.0
LRRCC1	85444	symbol	H. sapiens	85444	H. sapiens	LRRCC1	leucine rich repeat and coiled-coil centrosomal protein 1	GO:0051301 cell division;GO:0007049 cell cycle;GO:0009987 cellular process		Predicted intracellular proteins	Centrosome (Supported)				0.0	0.0	0.0	1.0	0.0	0.0	0.0	0.0	0.0	0.0	0.0	0.0	0.0	0.0	0.0	0.0	0.0	0.0	0.0	0.0
SLC35A5	55032	symbol	H. sapiens	55032	H. sapiens	SLC35A5	solute carrier family 35 member A5	GO:0090481 pyrimidine nucleotide-sugar transmembrane transport;GO:0015780 nucleotide-sugar transmembrane transport;GO:1901264 carbohydrate derivative transport		Transporters:Electrochemical Potential-driven transporters	Golgi apparatus (Approved)				0.0	0.0	0.0	0.0	0.0	0.0	0.0	0.0	0.0	0.0	0.0	0.0	1.0	0.0	0.0	0.0	0.0	0.0	0.0	0.0
DPAGT1	1798	symbol	H. sapiens	1798	H. sapiens	DPAGT1	dolichyl-phosphate N-acetylglucosaminephosphotransferase 1	GO:0019348 dolichol metabolic process;GO:0006489 dolichyl diphosphate biosynthetic process;GO:0046465 dolichyl diphosphate metabolic process		Potential drug targets; Disease related genes; Enzymes; ENZYME proteins:Transferases					0.0	0.0	0.0	0.0	0.0	0.0	0.0	0.0	0.0	0.0	0.0	0.0	0.0	0.0	0.0	0.0	0.0	0.0	0.0	0.0
MANEA	79694	symbol	H. sapiens	79694	H. sapiens	MANEA	mannosidase endo-alpha			Predicted intracellular proteins; Enzymes; ENZYME proteins:Hydrolases	Golgi apparatus (Supported)				0.0	0.0	0.0	0.0	0.0	0.0	0.0	0.0	0.0	0.0	0.0	0.0	0.0	0.0	0.0	0.0	0.0	0.0	0.0	0.0
MMD	23531	symbol	H. sapiens	23531	H. sapiens	MMD	monocyte to macrophage differentiation associated	GO:0019835 cytolysis;GO:0045666 positive regulation of neuron differentiation;GO:0045664 regulation of neuron differentiation		Transporters:Transporter channels and pores	Vesicles (Approved)			(M5953)HALLMARK KRAS SIGNALING UP	0.0	0.0	0.0	0.0	0.0	0.0	0.0	0.0	0.0	0.0	0.0	0.0	0.0	0.0	0.0	0.0	0.0	0.0	0.0	0.0
GEMIN2	8487	symbol	H. sapiens	8487	H. sapiens	GEMIN2	gem nuclear organelle associated protein 2	GO:1905215 negative regulation of RNA binding;GO:1905214 regulation of RNA binding;GO:0000387 spliceosomal snRNP assembly		Predicted intracellular proteins	Nuclear bodies;Nucleoplasm (Supported); Additional: Nucleoli				1.0	0.0	0.0	0.0	0.0	0.0	0.0	0.0	0.0	0.0	0.0	0.0	1.0	0.0	0.0	0.0	0.0	0.0	0.0	0.0
MED17	9440	symbol	H. sapiens	9440	H. sapiens	MED17	mediator complex subunit 17	GO:0060261 positive regulation of transcription initiation from RNA polymerase II promoter;GO:2000144 positive regulation of DNA-templated transcription, initiation;GO:0060260 regulation of transcription initiation from RNA polymerase II promoter		Cancer-related genes:Mutational cancer driver genes; Predicted intracellular proteins; Disease related genes	Nuclear speckles (Approved); Additional: Cytosol				0.0	0.0	0.0	0.0	0.0	0.0	0.0	0.0	0.0	0.0	0.0	0.0	0.0	0.0	0.0	0.0	1.0	0.0	0.0	0.0
CLDN7	1366	symbol	H. sapiens	1366	H. sapiens	CLDN7	claudin 7	GO:0016338 calcium-independent cell-cell adhesion via plasma membrane cell-adhesion molecules;GO:0070830 bicellular tight junction assembly;GO:0120192 tight junction assembly		Predicted intracellular proteins; Transporters:Transporter channels and pores; Cancer-related genes:Candidate cancer biomarkers	Vesicles (Approved); Additional: Cell Junctions			(M5906)HALLMARK ESTROGEN RESPONSE EARLY; (M5915)HALLMARK APICAL JUNCTION	0.0	0.0	0.0	0.0	0.0	0.0	0.0	0.0	0.0	0.0	0.0	0.0	0.0	0.0	0.0	0.0	0.0	0.0	0.0	0.0
ZNF691	51058	symbol	H. sapiens	51058	H. sapiens	ZNF691	zinc finger protein 691	GO:0006357 regulation of transcription by RNA polymerase II;GO:0006366 transcription by RNA polymerase II;GO:0006355 regulation of transcription, DNA-templated		Transcription factors:Zinc-coordinating DNA-binding domains; Predicted intracellular proteins	Nucleoplasm (Approved); Additional: Nucleoli;Vesicles				0.0	0.0	0.0	0.0	0.0	0.0	0.0	0.0	0.0	0.0	0.0	0.0	0.0	0.0	0.0	0.0	0.0	0.0	0.0	0.0
VPS50	55610	symbol	H. sapiens	55610	H. sapiens	VPS50	VPS50 subunit of EARP/GARPII complex	GO:0032456 endocytic recycling;GO:0042147 retrograde transport, endosome to Golgi;GO:0098876 vesicle-mediated transport to the plasma membrane		Predicted intracellular proteins	Cytosol (Uncertain); Additional: Plasma membrane			(M5956)HALLMARK KRAS SIGNALING DN	0.0	0.0	0.0	0.0	0.0	0.0	0.0	0.0	0.0	0.0	0.0	0.0	0.0	0.0	0.0	0.0	0.0	0.0	0.0	0.0
EDRF1	26098	symbol	H. sapiens	26098	H. sapiens	EDRF1	erythroid differentiation regulatory factor 1	GO:0045893 positive regulation of transcription, DNA-templated;GO:1903508 positive regulation of nucleic acid-templated transcription;GO:1902680 positive regulation of RNA biosynthetic process		Predicted intracellular proteins	Nucleoplasm (Approved); Additional: Centrosome;Cytosol				0.0	0.0	0.0	0.0	0.0	0.0	0.0	0.0	0.0	0.0	0.0	0.0	0.0	0.0	0.0	0.0	0.0	0.0	0.0	0.0
EMX2	2018	symbol	H. sapiens	2018	H. sapiens	EMX2	empty spiracles homeobox 2	GO:0021796 cerebral cortex regionalization;GO:0072197 ureter morphogenesis;GO:0021978 telencephalon regionalization		Predicted intracellular proteins; Disease related genes; Transcription factors:Helix-turn-helix domains	Nucleoplasm (Approved)				0.0	0.0	0.0	0.0	0.0	0.0	0.0	0.0	0.0	0.0	0.0	0.0	0.0	0.0	0.0	0.0	0.0	0.0	0.0	0.0
SBSN	374897	symbol	H. sapiens	374897	H. sapiens	SBSN	suprabasin	GO:0008150 biological_process		Predicted intracellular proteins; Predicted secreted proteins	Vesicles (Approved)				0.0	0.0	0.0	0.0	0.0	0.0	0.0	0.0	0.0	0.0	0.0	0.0	0.0	0.0	0.0	0.0	0.0	0.0	0.0	0.0
KLF6	1316	symbol	H. sapiens	1316	H. sapiens	KLF6	Kruppel like factor 6	GO:0030183 B cell differentiation;GO:0042113 B cell activation;GO:0030098 lymphocyte differentiation		Transcription factors:Zinc-coordinating DNA-binding domains; Predicted intracellular proteins; Disease related genes; Cancer-related genes	Nucleoplasm (Supported); Additional: Cytosol;Nucleoli;Vesicles			(M5947)HALLMARK IL2 STAT5 SIGNALING; (M5890)HALLMARK TNFA SIGNALING VIA NFKB; (M5891)HALLMARK HYPOXIA	0.0	0.0	0.0	0.0	0.0	0.0	0.0	0.0	0.0	0.0	0.0	0.0	0.0	0.0	0.0	0.0	0.0	0.0	0.0	1.0
MMP2	4313	symbol	H. sapiens	4313	H. sapiens	MMP2	matrix metallopeptidase 2	GO:0001957 intramembranous ossification;GO:0036072 direct ossification;GO:0001955 blood vessel maturation		Disease related genes; Predicted intracellular proteins; Cancer-related genes:Mutational cancer driver genes; Peptidases:Metallopeptidases; ENZYME proteins:Hydrolases; Cancer-related genes:Candidate cancer biomarkers; FDA approved drug targets:Small molecule drugs; Candidate cardiovascular disease genes; Predicted secreted proteins; Enzymes	Vesicles (Approved)	Marimastat; Captopril; SC-74020; Halofuginone; AE-941; Endostatin	(M63)PID AVB3 OPN PATHWAY; (M240)PID SYNDECAN 2 PATHWAY; (M65)PID FRA PATHWAY	(M5946)HALLMARK COAGULATION; (M5902)HALLMARK APOPTOSIS; (M5915)HALLMARK APICAL JUNCTION	0.0	0.0	0.0	0.0	0.0	0.0	0.0	0.0	0.0	0.0	0.0	0.0	0.0	0.0	0.0	0.0	0.0	0.0	0.0	1.0
APH1B	83464	symbol	H. sapiens	83464	H. sapiens	APH1B	aph-1 homolog B, gamma-secretase subunit	GO:0007220 Notch receptor processing;GO:0034205 amyloid-beta formation;GO:0050435 amyloid-beta metabolic process					(M251)PID SYNDECAN 3 PATHWAY; (M70)PID PS1 PATHWAY; (M17)PID NOTCH PATHWAY		0.0	0.0	0.0	0.0	0.0	0.0	0.0	0.0	0.0	0.0	0.0	0.0	0.0	0.0	0.0	0.0	0.0	0.0	1.0	0.0
SLC43A3	29015	symbol	H. sapiens	29015	H. sapiens	SLC43A3	solute carrier family 43 member 3	GO:0055085 transmembrane transport;GO:0006810 transport;GO:0051234 establishment of localization		Predicted intracellular proteins; Transporters:Electrochemical Potential-driven transporters	Vesicles (Approved); Additional: Nucleoplasm;Plasma membrane				0.0	0.0	0.0	0.0	0.0	0.0	0.0	0.0	0.0	0.0	0.0	0.0	0.0	0.0	0.0	0.0	0.0	0.0	0.0	0.0
PNPLA8	50640	symbol	H. sapiens	50640	H. sapiens	PNPLA8	patatin like phospholipase domain containing 8	GO:0046338 phosphatidylethanolamine catabolic process;GO:0034638 phosphatidylcholine catabolic process;GO:0032048 cardiolipin metabolic process		Disease related genes; Predicted intracellular proteins; Potential drug targets; ENZYME proteins:Hydrolases; Enzymes	Cytosol;Nucleoplasm (Approved); Additional: Golgi apparatus			(M5948)HALLMARK BILE ACID METABOLISM	0.0	0.0	0.0	0.0	0.0	0.0	0.0	0.0	0.0	0.0	0.0	0.0	0.0	0.0	0.0	0.0	0.0	0.0	0.0	0.0
RPS6KA3	6197	symbol	H. sapiens	6197	H. sapiens	RPS6KA3	ribosomal protein S6 kinase A3	GO:0043555 regulation of translation in response to stress;GO:0043620 regulation of DNA-templated transcription in response to stress;GO:0043154 negative regulation of cysteine-type endopeptidase activity involved in apoptotic process	AGC Ser/Thr protein kinase family	Disease related genes; Kinases:AGC Ser/Thr protein kinases; ENZYME proteins:Transferases; Predicted intracellular proteins; Potential drug targets; Cancer-related genes:Candidate cancer biomarkers; Enzymes	Nucleoplasm (Supported); Additional: Cytosol;Nucleoli	Acetylsalicylic acid; Fostamatinib	(M17200)SA B CELL RECEPTOR COMPLEXES; (M1315)SIG PIP3 SIGNALING IN B LYMPHOCYTES; (M7955)SIG INSULIN RECEPTOR PATHWAY IN CARDIAC MYOCYTES	(M5910)HALLMARK PROTEIN SECRETION; (M5908)HALLMARK ANDROGEN RESPONSE; (M5923)HALLMARK PI3K AKT MTOR SIGNALING	0.0	0.0	0.0	0.0	0.0	0.0	0.0	0.0	1.0	0.0	0.0	0.0	0.0	0.0	0.0	0.0	0.0	0.0	1.0	1.0
DCP1B	196513	symbol	H. sapiens	196513	H. sapiens	DCP1B	decapping mRNA 1B	GO:0031087 deadenylation-independent decapping of nuclear-transcribed mRNA;GO:0031086 nuclear-transcribed mRNA catabolic process, deadenylation-independent decay;GO:0000290 deadenylation-dependent decapping of nuclear-transcribed mRNA		Predicted intracellular proteins	Cytosol;Vesicles (Supported)		(M19)PID P73PATHWAY		1.0	0.0	0.0	0.0	1.0	0.0	0.0	0.0	1.0	0.0	0.0	0.0	0.0	0.0	0.0	0.0	0.0	0.0	0.0	0.0
VPS36	51028	symbol	H. sapiens	51028	H. sapiens	VPS36	vacuolar protein sorting 36 homolog	GO:0043328 protein transport to vacuole involved in ubiquitin-dependent protein catabolic process via the multivesicular body sorting pathway;GO:0032511 late endosome to vacuole transport via multivesicular body sorting pathway;GO:0043162 ubiquitin-dependent protein catabolic process via the multivesicular body sorting pathway		Predicted intracellular proteins	Lysosomes;Vesicles (Supported); Additional: Cell Junctions;Plasma membrane				0.0	0.0	0.0	0.0	0.0	0.0	1.0	0.0	0.0	0.0	1.0	0.0	0.0	0.0	0.0	0.0	0.0	0.0	0.0	0.0
CKAP2	26586	symbol	H. sapiens	26586	H. sapiens	CKAP2	cytoskeleton associated protein 2	GO:0007026 negative regulation of microtubule depolymerization;GO:0031114 regulation of microtubule depolymerization;GO:0031111 negative regulation of microtubule polymerization or depolymerization		Predicted intracellular proteins	Microtubules (Enhanced); Additional: Cytosol				0.0	0.0	0.0	1.0	0.0	0.0	0.0	0.0	0.0	0.0	0.0	1.0	0.0	0.0	0.0	0.0	0.0	0.0	0.0	0.0
ANKRD26	22852	symbol	H. sapiens	22852	H. sapiens	ANKRD26	ankyrin repeat domain 26	GO:0045599 negative regulation of fat cell differentiation;GO:0045598 regulation of fat cell differentiation;GO:0045444 fat cell differentiation		Predicted intracellular proteins; Disease related genes	Golgi apparatus;Vesicles (Approved)				0.0	0.0	0.0	0.0	0.0	0.0	0.0	0.0	0.0	0.0	0.0	0.0	0.0	0.0	0.0	0.0	0.0	0.0	0.0	0.0
NIPSNAP3B	55335	symbol	H. sapiens	55335	H. sapiens	NIPSNAP3B	nipsnap homolog 3B			Predicted intracellular proteins					0.0	0.0	0.0	0.0	0.0	0.0	0.0	0.0	0.0	0.0	0.0	0.0	0.0	0.0	0.0	0.0	0.0	0.0	0.0	0.0
TMEM176A	55365	symbol	H. sapiens	55365	H. sapiens	TMEM176A	transmembrane protein 176A	GO:2001199 negative regulation of dendritic cell differentiation;GO:2001198 regulation of dendritic cell differentiation;GO:0097028 dendritic cell differentiation			Mitochondria (Approved)			(M5953)HALLMARK KRAS SIGNALING UP	0.0	0.0	0.0	0.0	0.0	0.0	0.0	0.0	0.0	0.0	0.0	0.0	0.0	0.0	0.0	0.0	0.0	0.0	0.0	0.0
PHLPP2	23035	symbol	H. sapiens	23035	H. sapiens	PHLPP2	PH domain and leucine rich repeat protein phosphatase 2	GO:0021766 hippocampus development;GO:0021761 limbic system development;GO:0021543 pallium development		Predicted intracellular proteins; Enzymes; ENZYME proteins:Hydrolases	Cytosol (Supported); Additional: Cytokinetic bridge;Mitotic spindle;Nucleoplasm				0.0	0.0	0.0	0.0	0.0	0.0	0.0	0.0	0.0	0.0	0.0	0.0	0.0	0.0	0.0	0.0	0.0	0.0	0.0	0.0
NEK9	91754	symbol	H. sapiens	91754	H. sapiens	NEK9	NIMA related kinase 9	GO:0051301 cell division;GO:0006468 protein phosphorylation;GO:0007049 cell cycle	NEK Ser/Thr protein kinase family	Kinases:NEK Ser/Thr protein kinases; Disease related genes; ENZYME proteins:Transferases; Predicted intracellular proteins; Transporters:Transporter channels and pores; Potential drug targets; Enzymes	Mitochondria (Approved)	Fostamatinib			0.0	0.0	1.0	1.0	0.0	0.0	0.0	0.0	0.0	0.0	0.0	0.0	0.0	0.0	0.0	0.0	0.0	0.0	0.0	0.0
DAB2	1601	symbol	H. sapiens	1601	H. sapiens	DAB2	DAB adaptor protein 2	GO:0035026 leading edge cell differentiation;GO:2000370 positive regulation of clathrin-dependent endocytosis;GO:2000643 positive regulation of early endosome to late endosome transport		Predicted intracellular proteins	Plasma membrane;Vesicles (Enhanced); Additional: Nucleoli fibrillar center		(M286)PID TGFBR PATHWAY	(M5942)HALLMARK UV RESPONSE DN; (M5930)HALLMARK EPITHELIAL MESENCHYMAL TRANSITION	0.0	0.0	0.0	0.0	0.0	0.0	1.0	0.0	1.0	0.0	1.0	0.0	0.0	0.0	0.0	0.0	0.0	0.0	0.0	1.0
[truncated: 93 more rows]

## Sheet: Enrichment
GroupID	Category	Term	Description	LogP	Log(q-value)	InTerm_InList	Genes	Symbols
[truncated: 358 more rows]
