# Supplementary material for: Transcriptional profiling of Hutchinson-Gilford Progeria syndrome fibroblasts reveals deficits in mesenchymal stem cell commitment to differentiation related to early events in endochondral ossification
Source: eLife journal article supplement (doi:10.7554/elife.81290), 2022-12-29
Supplement: table1-data1 [file metascape_result.xlsx]

## Sheet: Annotation
MyList	Gene ID	Type	Tax ID	Homologene Gene ID	Homologene Gene Tax ID	Gene Symbol	Description	Biological Process (GO)	Kinase Class (UniProt)	Protein Function (Protein Atlas)	Subcellular Location (Protein Atlas)	Drug (DrugBank)	Canonical Pathways	Hallmark Gene Sets	R-HSA-2262752 Cellular responses to stress	R-HSA-3214815 HDACs deacetylate histones	R-HSA-5688426 Deubiquitination	GO:0007005 mitochondrion organization	R-HSA-163200 Respiratory electron transport	GO:0060968 regulation of gene silencing	GO:0030099 myeloid cell differentiation	WP4320 Effect of progerin on genes in	CORUM:5380 TRBP containing complex (DICER	GO:0022613 ribonucleoprotein complex biog	GO:0061061 muscle structure development	GO:0097190 apoptotic signaling pathway	WP3888 VEGFA-VEGFR2 signaling pathway	R-HSA-8951664 Neddylation	R-HSA-8866654 E3 ubiquitin ligases ubiquitin	GO:0016055 Wnt signaling pathway	GO:0080135 regulation of cellular respons	R-HSA-5607764 CLEC7A (Dectin-1) signaling	hsa04657 IL-17 signaling pathway	GO:0042176 regulation of protein cataboli
AARSD1	80755	symbol	H. sapiens	80755	H. sapiens	AARSD1	alanyl-tRNA synthetase domain containing 1	GO:0006419 alanyl-tRNA aminoacylation;GO:0106074 aminoacyl-tRNA metabolism involved in translational fidelity;GO:0006450 regulation of translational fidelity		Predicted intracellular proteins	Cytosol;Nuclear membrane (Approved)				1.0	0.0	0.0	0.0	0.0	0.0	0.0	0.0	0.0	1.0	0.0	0.0	0.0	0.0	0.0	0.0	0.0	0.0	0.0	0.0
AATK	9625	symbol	H. sapiens	9625	H. sapiens	AATK	apoptosis associated tyrosine kinase	GO:0038083 peptidyl-tyrosine autophosphorylation;GO:0046777 protein autophosphorylation;GO:0018108 peptidyl-tyrosine phosphorylation	Tyr protein kinase family	ENZYME proteins:Transferases; Predicted intracellular proteins; Kinases:Tyr protein kinases; Enzymes	Mitochondria (Uncertain)				0.0	0.0	0.0	0.0	0.0	0.0	0.0	0.0	0.0	0.0	0.0	0.0	0.0	0.0	0.0	0.0	0.0	0.0	0.0	0.0
ABALON	103021294	symbol	H. sapiens	103021294	H. sapiens	ABALON	apoptotic BCL2L1-antisense long non-coding RNA								0.0	0.0	0.0	0.0	0.0	0.0	0.0	0.0	0.0	0.0	0.0	0.0	0.0	0.0	0.0	0.0	0.0	0.0	0.0	0.0
ABCA3	21	symbol	H. sapiens	21	H. sapiens	ABCA3	ATP binding cassette subfamily A member 3	GO:0032462 regulation of protein homooligomerization;GO:0032464 positive regulation of protein homooligomerization;GO:0032459 regulation of protein oligomerization		Transporters:Primary Active Transporters; Potential drug targets; Disease related genes	Cytosol;Nucleoplasm (Approved)		(M200)PID ERA GENOMIC PATHWAY	(M5948)HALLMARK BILE ACID METABOLISM; (M5906)HALLMARK ESTROGEN RESPONSE EARLY; (M5907)HALLMARK ESTROGEN RESPONSE LATE	0.0	0.0	0.0	0.0	0.0	0.0	0.0	0.0	0.0	0.0	0.0	0.0	0.0	0.0	0.0	0.0	0.0	1.0	0.0	0.0
ABCB9	23457	symbol	H. sapiens	23457	H. sapiens	ABCB9	ATP binding cassette subfamily B member 9	GO:0035672 oligopeptide transmembrane transport;GO:0006857 oligopeptide transport;GO:0019885 antigen processing and presentation of endogenous peptide antigen via MHC class I		Predicted intracellular proteins; Transporters:Primary Active Transporters	Vesicles (Supported)			(M5949)HALLMARK PEROXISOME	0.0	0.0	0.0	0.0	0.0	0.0	0.0	0.0	0.0	0.0	0.0	0.0	0.0	0.0	0.0	0.0	0.0	1.0	0.0	0.0
ABCD1	215	symbol	H. sapiens	215	H. sapiens	ABCD1	ATP binding cassette subfamily D member 1	GO:0036113 very long-chain fatty-acyl-CoA catabolic process;GO:0015916 fatty-acyl-CoA transport;GO:1901337 thioester transport		Transporters:Primary Active Transporters; Potential drug targets; Disease related genes				(M5949)HALLMARK PEROXISOME; (M5948)HALLMARK BILE ACID METABOLISM	0.0	0.0	0.0	1.0	1.0	0.0	0.0	0.0	0.0	0.0	0.0	0.0	0.0	0.0	0.0	0.0	1.0	1.0	0.0	1.0
ABCG1	9619	symbol	H. sapiens	9619	H. sapiens	ABCG1	ATP binding cassette subfamily G member 1	GO:1904409 regulation of secretory granule organization;GO:1904411 positive regulation of secretory granule organization;GO:0071403 cellular response to high density lipoprotein particle stimulus		Predicted intracellular proteins; Transporters:Primary Active Transporters	Golgi apparatus;Vesicles (Supported)	ATP			0.0	1.0	0.0	0.0	0.0	0.0	1.0	0.0	0.0	0.0	0.0	0.0	0.0	0.0	0.0	0.0	0.0	1.0	0.0	0.0
ABHD16A	7920	symbol	H. sapiens	7920	H. sapiens	ABHD16A	abhydrolase domain containing 16A, phospholipase	GO:0062232 prostanoid catabolic process;GO:1905344 prostaglandin catabolic process;GO:0006660 phosphatidylserine catabolic process							0.0	0.0	0.0	0.0	0.0	0.0	0.0	0.0	0.0	0.0	0.0	0.0	0.0	0.0	0.0	0.0	0.0	0.0	0.0	0.0
ABHD16B	140701	symbol	H. sapiens	140701	H. sapiens	ABHD16B	abhydrolase domain containing 16B	GO:0006660 phosphatidylserine catabolic process;GO:0052651 monoacylglycerol catabolic process;GO:0046462 monoacylglycerol metabolic process		Predicted intracellular proteins	Nucleoplasm (Enhanced)				0.0	0.0	0.0	0.0	0.0	0.0	0.0	0.0	0.0	0.0	0.0	0.0	0.0	0.0	0.0	0.0	0.0	0.0	0.0	0.0
ABHD17A	81926	symbol	H. sapiens	81926	H. sapiens	ABHD17A	abhydrolase domain containing 17A, depalmitoylase	GO:1902816 regulation of protein localization to microtubule;GO:1902817 negative regulation of protein localization to microtubule;GO:0002084 protein depalmitoylation		Predicted intracellular proteins; ENZYME proteins:Hydrolases; Enzymes	Vesicles (Approved); Additional: Nuclear speckles				0.0	0.0	0.0	0.0	0.0	0.0	0.0	0.0	0.0	0.0	0.0	0.0	0.0	0.0	0.0	0.0	0.0	0.0	0.0	0.0
ABHD8	79575	symbol	H. sapiens	79575	H. sapiens	ABHD8	abhydrolase domain containing 8	GO:0006654 phosphatidic acid biosynthetic process;GO:0046473 phosphatidic acid metabolic process;GO:0055088 lipid homeostasis		Predicted intracellular proteins	Nucleoplasm (Approved); Additional: Nuclear bodies				0.0	0.0	0.0	0.0	0.0	0.0	0.0	0.0	0.0	0.0	0.0	0.0	0.0	0.0	0.0	0.0	0.0	0.0	0.0	0.0
ACAD11	84129	symbol	H. sapiens	84129	H. sapiens	ACAD11	acyl-CoA dehydrogenase family member 11	GO:0033539 fatty acid beta-oxidation using acyl-CoA dehydrogenase;GO:0006635 fatty acid beta-oxidation;GO:0009062 fatty acid catabolic process		Predicted intracellular proteins					0.0	0.0	0.0	0.0	0.0	0.0	0.0	0.0	0.0	0.0	0.0	0.0	0.0	0.0	0.0	0.0	0.0	0.0	0.0	0.0
ACBD6	84320	symbol	H. sapiens	84320	H. sapiens	ACBD6	acyl-CoA binding domain containing 6			Predicted intracellular proteins	Nucleoplasm (Approved); Additional: Cytosol				0.0	0.0	0.0	0.0	0.0	0.0	0.0	0.0	0.0	0.0	0.0	0.0	0.0	0.0	0.0	0.0	0.0	0.0	0.0	0.0
ACOT1	641371	symbol	H. sapiens	641371	H. sapiens	ACOT1	acyl-CoA thioesterase 1	GO:0000038 very long-chain fatty acid metabolic process;GO:0006637 acyl-CoA metabolic process;GO:0035383 thioester metabolic process		Predicted intracellular proteins; ENZYME proteins:Hydrolases; Enzymes	Mitochondria (Approved)				0.0	0.0	0.0	0.0	0.0	0.0	0.0	0.0	0.0	0.0	0.0	0.0	0.0	0.0	0.0	0.0	0.0	0.0	0.0	0.0
ACOT2	10965	symbol	H. sapiens	10965	H. sapiens	ACOT2	acyl-CoA thioesterase 2	GO:0000038 very long-chain fatty acid metabolic process;GO:0006637 acyl-CoA metabolic process;GO:0035383 thioester metabolic process		Predicted intracellular proteins; ENZYME proteins:Hydrolases; Enzymes	Mitochondria (Approved)			(M5935)HALLMARK FATTY ACID METABOLISM	0.0	0.0	0.0	1.0	0.0	0.0	0.0	0.0	0.0	0.0	0.0	0.0	0.0	0.0	0.0	0.0	0.0	0.0	0.0	0.0
ACOX3	8310	symbol	H. sapiens	8310	H. sapiens	ACOX3	acyl-CoA oxidase 3, pristanoyl	GO:0033540 fatty acid beta-oxidation using acyl-CoA oxidase;GO:0006635 fatty acid beta-oxidation;GO:0009062 fatty acid catabolic process		Predicted intracellular proteins; Enzymes; ENZYME proteins:Oxidoreductases	Peroxisomes (Approved)			(M5934)HALLMARK XENOBIOTIC METABOLISM	0.0	0.0	0.0	1.0	0.0	0.0	0.0	0.0	0.0	0.0	0.0	0.0	0.0	0.0	0.0	0.0	0.0	0.0	0.0	0.0
ACSF3	197322	symbol	H. sapiens	197322	H. sapiens	ACSF3	acyl-CoA synthetase family member 3	GO:0090410 malonate catabolic process;GO:0043649 dicarboxylic acid catabolic process;GO:0035338 long-chain fatty-acyl-CoA biosynthetic process		Predicted intracellular proteins; Disease related genes					0.0	0.0	0.0	0.0	0.0	0.0	0.0	0.0	0.0	0.0	0.0	0.0	0.0	0.0	0.0	0.0	0.0	0.0	0.0	0.0
ACTB	60	symbol	H. sapiens	60	H. sapiens	ACTB	actin beta	GO:0051623 positive regulation of norepinephrine uptake;GO:0072749 cellular response to cytochalasin B;GO:1901328 response to cytochalasin B		Predicted intracellular proteins; Disease related genes		Quercetin; Phenethyl Isothiocyanate	(M5493)WNT SIGNALING	(M5915)HALLMARK APICAL JUNCTION	1.0	1.0	1.0	0.0	0.0	0.0	0.0	1.0	0.0	0.0	0.0	0.0	0.0	0.0	0.0	0.0	0.0	1.0	0.0	0.0
ACTG2	72	symbol	H. sapiens	72	H. sapiens	ACTG2	actin gamma 2, smooth muscle	GO:0090131 mesenchyme migration;GO:0072132 mesenchyme morphogenesis;GO:0060485 mesenchyme development		Predicted intracellular proteins; Disease related genes			(M16801)SIG REGULATION OF THE ACTIN CYTOSKELETON BY RHO GTPASES	(M5915)HALLMARK APICAL JUNCTION	1.0	0.0	0.0	0.0	0.0	0.0	0.0	0.0	0.0	0.0	0.0	0.0	0.0	0.0	0.0	0.0	0.0	0.0	0.0	0.0
ACTL10	170487	symbol	H. sapiens	170487	H. sapiens	ACTL10	actin like 10								0.0	0.0	0.0	0.0	0.0	0.0	0.0	0.0	0.0	0.0	0.0	0.0	0.0	0.0	0.0	0.0	0.0	0.0	0.0	0.0
ACTN1	87	symbol	H. sapiens	87	H. sapiens	ACTN1	actinin alpha 1	GO:0051639 actin filament network formation;GO:0030220 platelet formation;GO:0036344 platelet morphogenesis		Predicted intracellular proteins; Disease related genes; FDA approved drug targets:Biotech drugs	Actin filaments;Focal adhesion sites;Plasma membrane (Approved)	Human calcitonin; Copper	(M165)PID SYNDECAN 4 PATHWAY; (M232)PID ECADHERIN STABILIZATION PATHWAY; (M71)PID ILK PATHWAY	(M5908)HALLMARK ANDROGEN RESPONSE; (M5915)HALLMARK APICAL JUNCTION	0.0	1.0	0.0	0.0	0.0	0.0	1.0	0.0	0.0	0.0	0.0	0.0	0.0	0.0	0.0	0.0	0.0	0.0	0.0	0.0
ACY1	95	symbol	H. sapiens	95	H. sapiens	ACY1	aminoacylase 1	GO:0006520 cellular amino acid metabolic process;GO:0019752 carboxylic acid metabolic process;GO:0043436 oxoacid metabolic process		Predicted intracellular proteins; ENZYME proteins:Hydrolases; Enzymes; Disease related genes; Potential drug targets; Peptidases:Metallopeptidases		Aspartic acid; Acetylcysteine; Copper			0.0	0.0	0.0	0.0	0.0	0.0	0.0	0.0	0.0	0.0	0.0	0.0	0.0	0.0	0.0	0.0	0.0	0.0	0.0	0.0
ADAMTS15	170689	symbol	H. sapiens	170689	H. sapiens	ADAMTS15	ADAM metallopeptidase with thrombospondin type 1 motif 15	GO:0007520 myoblast fusion;GO:0000768 syncytium formation by plasma membrane fusion;GO:0140253 cell-cell fusion		Predicted secreted proteins	Cytosol (Approved)		(M3468)NABA ECM REGULATORS; (M5885)NABA MATRISOME ASSOCIATED; (M5889)NABA MATRISOME		0.0	0.0	0.0	0.0	0.0	0.0	0.0	0.0	0.0	0.0	1.0	0.0	0.0	0.0	0.0	0.0	0.0	0.0	0.0	0.0
ADAMTS4	9507	symbol	H. sapiens	9507	H. sapiens	ADAMTS4	ADAM metallopeptidase with thrombospondin type 1 motif 4	GO:0022617 extracellular matrix disassembly;GO:0030198 extracellular matrix organization;GO:0043062 extracellular structure organization		Cancer-related genes:Candidate cancer biomarkers; Transporters:Accessory Factors Involved in Transport; Predicted intracellular proteins; Predicted secreted proteins; ENZYME proteins:Hydrolases; Enzymes	Nuclear speckles (Supported)		(M3468)NABA ECM REGULATORS; (M5885)NABA MATRISOME ASSOCIATED; (M5889)NABA MATRISOME		0.0	0.0	0.0	0.0	0.0	0.0	0.0	0.0	0.0	0.0	0.0	0.0	0.0	0.0	0.0	0.0	0.0	0.0	0.0	0.0
ADAMTS7	11173	symbol	H. sapiens	11173	H. sapiens	ADAMTS7	ADAM metallopeptidase with thrombospondin type 1 motif 7	GO:0032331 negative regulation of chondrocyte differentiation;GO:0061037 negative regulation of cartilage development;GO:0032330 regulation of chondrocyte differentiation		Predicted secreted proteins	Vesicles (Supported)		(M3468)NABA ECM REGULATORS; (M5885)NABA MATRISOME ASSOCIATED; (M5889)NABA MATRISOME		0.0	0.0	0.0	0.0	0.0	0.0	1.0	0.0	0.0	0.0	0.0	0.0	0.0	1.0	0.0	0.0	0.0	0.0	0.0	0.0
ADAMTSL3	57188	symbol	H. sapiens	57188	H. sapiens	ADAMTSL3	ADAMTS like 3	GO:0030198 extracellular matrix organization;GO:0043062 extracellular structure organization;GO:0045229 external encapsulating structure organization		Predicted secreted proteins	Vesicles (Uncertain)		(M3468)NABA ECM REGULATORS; (M5885)NABA MATRISOME ASSOCIATED; (M5889)NABA MATRISOME		0.0	0.0	0.0	0.0	0.0	0.0	0.0	0.0	0.0	0.0	0.0	0.0	0.0	0.0	0.0	0.0	0.0	0.0	0.0	0.0
ADCK2	90956	symbol	H. sapiens	90956	H. sapiens	ADCK2	aarF domain containing kinase 2	GO:0006468 protein phosphorylation;GO:0016310 phosphorylation;GO:0006796 phosphate-containing compound metabolic process	Atypical: ADCK protein kinase family	Predicted intracellular proteins; Enzymes; Kinases:Atypical kinases	Centrosome;Cytosol (Uncertain)				0.0	0.0	0.0	0.0	0.0	0.0	0.0	0.0	0.0	0.0	0.0	0.0	0.0	0.0	0.0	0.0	0.0	0.0	0.0	0.0
ADCK4	79934	gene_synonym	H. sapiens	79934	H. sapiens	COQ8B	coenzyme Q8B	GO:0021692 cerebellar Purkinje cell layer morphogenesis;GO:0006744 ubiquinone biosynthetic process;GO:1901663 quinone biosynthetic process	Atypical: ADCK protein kinase family	Predicted intracellular proteins; Enzymes; Disease related genes; Potential drug targets; Kinases:Atypical kinases	Mitochondria (Enhanced)	Fostamatinib			0.0	0.0	0.0	0.0	0.0	0.0	0.0	0.0	0.0	0.0	0.0	0.0	0.0	0.0	0.0	0.0	0.0	0.0	0.0	0.0
ADD3-AS1	100505933	symbol	H. sapiens	100505933	H. sapiens	ADD3-AS1	ADD3 antisense RNA 1								0.0	0.0	0.0	0.0	0.0	0.0	0.0	0.0	0.0	0.0	0.0	0.0	0.0	0.0	0.0	0.0	0.0	0.0	0.0	0.0
ADGRB2	576	symbol	H. sapiens	576	H. sapiens	ADGRB2	adhesion G protein-coupled receptor B2	GO:0033173 calcineurin-NFAT signaling cascade;GO:0097720 calcineurin-mediated signaling;GO:0048016 inositol phosphate-mediated signaling		Predicted intracellular proteins; Transporters; G-protein coupled receptors:GPCRs excl olfactory receptors; G-protein coupled receptors:Family 2 (B) receptors	Plasma membrane (Supported)				0.0	0.0	0.0	0.0	0.0	0.0	0.0	0.0	0.0	0.0	0.0	0.0	0.0	0.0	0.0	0.0	0.0	0.0	0.0	0.0
ADGRG2	10149	symbol	H. sapiens	10149	H. sapiens	ADGRG2	adhesion G protein-coupled receptor G2	GO:0007189 adenylate cyclase-activating G protein-coupled receptor signaling pathway;GO:0007188 adenylate cyclase-modulating G protein-coupled receptor signaling pathway;GO:0007283 spermatogenesis		Potential drug targets; G-protein coupled receptors:GPCRs excl olfactory receptors; Disease related genes; G-protein coupled receptors:Family 2 (B) receptors	Cytosol;Plasma membrane (Approved)				0.0	0.0	0.0	0.0	0.0	0.0	0.0	0.0	0.0	0.0	0.0	0.0	0.0	0.0	0.0	0.0	0.0	0.0	0.0	0.0
ADGRL1	22859	symbol	H. sapiens	22859	H. sapiens	ADGRL1	adhesion G protein-coupled receptor L1	GO:0090129 positive regulation of synapse maturation;GO:0090128 regulation of synapse maturation;GO:0035584 calcium-mediated signaling using intracellular calcium source		Predicted intracellular proteins; G-protein coupled receptors:GPCRs excl olfactory receptors; G-protein coupled receptors:Family 2 (B) receptors					0.0	0.0	0.0	0.0	0.0	0.0	0.0	0.0	0.0	0.0	0.0	0.0	0.0	0.0	0.0	0.0	0.0	0.0	0.0	0.0
ADM2	79924	symbol	H. sapiens	79924	H. sapiens	ADM2	adrenomedullin 2	GO:0045776 negative regulation of blood pressure;GO:0007631 feeding behavior;GO:0007586 digestion		Predicted secreted proteins					0.0	0.0	0.0	0.0	0.0	0.0	0.0	0.0	0.0	0.0	0.0	0.0	0.0	0.0	0.0	0.0	0.0	0.0	0.0	0.0
ADRBK1	156	gene_synonym	H. sapiens	156	H. sapiens	GRK2	G protein-coupled receptor kinase 2	GO:0003108 negative regulation of the force of heart contraction by chemical signal;GO:1901081 negative regulation of relaxation of smooth muscle;GO:1901080 regulation of relaxation of smooth muscle	AGC Ser/Thr protein kinase family	ENZYME proteins:Transferases; Predicted intracellular proteins; Kinases:AGC Ser/Thr protein kinases; Enzymes	Vesicles (Approved)	ATP	(M211)PID HEDGEHOG 2PATHWAY; (M7416)ST GAQ PATHWAY; (M252)PID IL8 CXCR1 PATHWAY	(M5923)HALLMARK PI3K AKT MTOR SIGNALING	0.0	0.0	0.0	0.0	0.0	0.0	0.0	0.0	0.0	0.0	1.0	0.0	0.0	0.0	0.0	0.0	0.0	1.0	0.0	0.0
AES	166	gene_synonym	H. sapiens	166	H. sapiens	TLE5	TLE family member 5, transcriptional modulator	GO:2000210 positive regulation of anoikis;GO:2000209 regulation of anoikis;GO:0043276 anoikis		Predicted intracellular proteins	Nucleoplasm (Supported)		(M70)PID PS1 PATHWAY; (M223)PID BETA CATENIN NUC PATHWAY; (M5493)WNT SIGNALING		0.0	1.0	0.0	0.0	0.0	0.0	0.0	0.0	0.0	0.0	0.0	0.0	0.0	0.0	0.0	1.0	0.0	1.0	0.0	0.0
AFAP1	60312	symbol	H. sapiens	60312	H. sapiens	AFAP1	actin filament associated protein 1	GO:0051493 regulation of cytoskeleton organization;GO:0033043 regulation of organelle organization;GO:0007010 cytoskeleton organization		Predicted intracellular proteins	Actin filaments;Cytosol (Supported); Additional: Focal adhesion sites				0.0	0.0	0.0	0.0	0.0	0.0	0.0	0.0	0.0	0.0	0.0	0.0	0.0	0.0	0.0	0.0	0.0	0.0	0.0	0.0
AFAP1-AS1	84740	symbol	H. sapiens	84740	H. sapiens	AFAP1-AS1	AFAP1 antisense RNA 1								0.0	0.0	0.0	0.0	0.0	0.0	0.0	0.0	0.0	0.0	0.0	0.0	0.0	0.0	0.0	0.0	0.0	0.0	0.0	0.0
AGAP2	116986	symbol	H. sapiens	116986	H. sapiens	AGAP2	ArfGAP with GTPase domain, ankyrin repeat and PH domain 2	GO:0061901 regulation of 1-phosphatidylinositol-3-kinase activity;GO:0061903 positive regulation of 1-phosphatidylinositol-3-kinase activity;GO:0043552 positive regulation of phosphatidylinositol 3-kinase activity		Predicted intracellular proteins	Cytosol;Nucleoplasm (Supported); Additional: Midbody ring		(M108)PID NETRIN PATHWAY; (M271)PID PI3K PLC TRK PATHWAY		1.0	0.0	0.0	0.0	0.0	0.0	0.0	0.0	0.0	0.0	0.0	0.0	0.0	0.0	0.0	0.0	0.0	0.0	0.0	1.0
AGAP2-AS1	100130776	symbol	H. sapiens	100130776	H. sapiens	AGAP2-AS1	AGAP2 antisense RNA 1								0.0	0.0	0.0	0.0	0.0	0.0	0.0	0.0	0.0	0.0	0.0	0.0	0.0	0.0	0.0	0.0	0.0	0.0	0.0	0.0
AGO1	26523	symbol	H. sapiens	26523	H. sapiens	AGO1	argonaute RISC component 1	GO:0090625 mRNA cleavage involved in gene silencing by siRNA;GO:0035279 mRNA cleavage involved in gene silencing by miRNA;GO:0098795 mRNA cleavage involved in gene silencing		Predicted intracellular proteins	Cytoplasmic bodies (Supported); Additional: Cytosol				1.0	1.0	0.0	0.0	0.0	1.0	0.0	0.0	0.0	1.0	0.0	0.0	0.0	0.0	0.0	0.0	0.0	1.0	0.0	0.0
AGO2	27161	symbol	H. sapiens	27161	H. sapiens	AGO2	argonaute RISC catalytic component 2	GO:0045975 positive regulation of translation, ncRNA-mediated;GO:0035087 siRNA loading onto RISC involved in RNA interference;GO:0090625 mRNA cleavage involved in gene silencing by siRNA		Predicted intracellular proteins; ENZYME proteins:Hydrolases; Enzymes	Cytoplasmic bodies (Supported); Additional: Cytosol			(M5941)HALLMARK UV RESPONSE UP	1.0	1.0	0.0	0.0	0.0	1.0	0.0	0.0	0.0	1.0	0.0	0.0	0.0	0.0	0.0	0.0	0.0	1.0	0.0	1.0
AGRN	375790	symbol	H. sapiens	375790	H. sapiens	AGRN	agrin	GO:0045887 positive regulation of synaptic assembly at neuromuscular junction;GO:1904398 positive regulation of neuromuscular junction development;GO:0008582 regulation of synaptic assembly at neuromuscular junction		Predicted intracellular proteins; Predicted secreted proteins; Disease related genes	Cytosol (Approved); Additional: Plasma membrane		(M5887)NABA BASEMENT MEMBRANES; (M3008)NABA ECM GLYCOPROTEINS; (M5884)NABA CORE MATRISOME	(M5909)HALLMARK MYOGENESIS; (M5937)HALLMARK GLYCOLYSIS	1.0	0.0	0.0	0.0	0.0	0.0	0.0	0.0	0.0	0.0	0.0	0.0	0.0	0.0	0.0	0.0	0.0	0.0	0.0	0.0
AHCTF1P1	285116	symbol	H. sapiens	285116	H. sapiens	AHCTF1P1	AT-hook containing transcription factor 1 pseudogene 1								0.0	0.0	0.0	0.0	0.0	0.0	0.0	0.0	0.0	0.0	0.0	0.0	0.0	0.0	0.0	0.0	0.0	0.0	0.0	0.0
AHCY	191	symbol	H. sapiens	191	H. sapiens	AHCY	adenosylhomocysteinase	GO:0019510 S-adenosylhomocysteine catabolic process;GO:0046498 S-adenosylhomocysteine metabolic process;GO:0002439 chronic inflammatory response to antigenic stimulus		Predicted intracellular proteins; ENZYME proteins:Hydrolases; Enzymes; Disease related genes; Potential drug targets	Cytosol (Supported)	(1'R,2'S)-9-(2-Hydroxy-3'-Keto-Cyclopenten-1-yl)Adenine; 3'-Oxo-Adenosine; D-Eritadenine; Copper		(M5947)HALLMARK IL2 STAT5 SIGNALING; (M5934)HALLMARK XENOBIOTIC METABOLISM	1.0	0.0	0.0	0.0	0.0	0.0	0.0	0.0	0.0	0.0	0.0	0.0	0.0	0.0	0.0	0.0	0.0	0.0	0.0	0.0
AIMP2	7965	symbol	H. sapiens	7965	H. sapiens	AIMP2	aminoacyl tRNA synthetase complex interacting multifunctional protein 2	GO:1903632 positive regulation of aminoacyl-tRNA ligase activity;GO:1903630 regulation of aminoacyl-tRNA ligase activity;GO:0060510 type II pneumocyte differentiation		Predicted intracellular proteins	Cytosol (Approved)			(M5928)HALLMARK MYC TARGETS V2; (M5926)HALLMARK MYC TARGETS V1	1.0	0.0	0.0	0.0	0.0	0.0	0.0	0.0	0.0	0.0	0.0	0.0	0.0	0.0	0.0	0.0	0.0	0.0	0.0	0.0
AIP	9049	symbol	H. sapiens	9049	H. sapiens	AIP	aryl hydrocarbon receptor interacting protein	GO:0051344 negative regulation of cyclic-nucleotide phosphodiesterase activity;GO:0022417 protein maturation by protein folding;GO:0051342 regulation of cyclic-nucleotide phosphodiesterase activity		Predicted intracellular proteins; Disease related genes	Cytosol (Supported)				0.0	0.0	0.0	1.0	0.0	0.0	0.0	0.0	0.0	0.0	0.0	0.0	0.0	0.0	0.0	0.0	0.0	0.0	0.0	0.0
AKAP2	445815	gene_synonym	H. sapiens	445815	H. sapiens	PALM2AKAP2	PALM2 and AKAP2 fusion	GO:0008360 regulation of cell shape;GO:0022604 regulation of cell morphogenesis;GO:0022603 regulation of anatomical structure morphogenesis		Predicted intracellular proteins	Plasma membrane (Approved); Additional: Nuclear bodies;Nucleoplasm				0.0	0.0	0.0	0.0	0.0	0.0	0.0	0.0	0.0	0.0	0.0	0.0	1.0	0.0	0.0	0.0	0.0	0.0	0.0	0.0
AKAP5	9495	symbol	H. sapiens	9495	H. sapiens	AKAP5	A-kinase anchoring protein 5	GO:1905751 positive regulation of endosome to plasma membrane protein transport;GO:1905749 regulation of endosome to plasma membrane protein transport;GO:2001137 positive regulation of endocytic recycling		Predicted intracellular proteins; Transporters:Accessory Factors Involved in Transport	Nucleoplasm (Approved)		(M235)PID TCR CALCIUM PATHWAY; (M113)PID NFAT 3PATHWAY		1.0	0.0	0.0	0.0	0.0	0.0	0.0	0.0	0.0	0.0	0.0	0.0	0.0	0.0	0.0	0.0	0.0	0.0	0.0	0.0
AKAP8L	26993	symbol	H. sapiens	26993	H. sapiens	AKAP8L	A-kinase anchoring protein 8 like	GO:0010793 regulation of mRNA export from nucleus;GO:2000197 regulation of ribonucleoprotein complex localization;GO:0051081 nuclear membrane disassembly		Predicted intracellular proteins	Nuclear speckles (Supported)				0.0	1.0	0.0	0.0	0.0	0.0	0.0	0.0	0.0	0.0	0.0	0.0	0.0	0.0	0.0	0.0	0.0	0.0	1.0	0.0
AKIP1	56672	symbol	H. sapiens	56672	H. sapiens	AKIP1	A-kinase interacting protein 1	GO:0034446 substrate adhesion-dependent cell spreading;GO:1901222 regulation of NIK/NF-kappaB signaling;GO:0038061 NIK/NF-kappaB signaling		Predicted intracellular proteins	Nucleoplasm (Supported)				0.0	0.0	0.0	0.0	0.0	0.0	0.0	0.0	0.0	0.0	0.0	0.0	0.0	0.0	0.0	0.0	0.0	0.0	0.0	0.0
AKR7A2	8574	symbol	H. sapiens	8574	H. sapiens	AKR7A2	aldo-keto reductase family 7 member A2	GO:0044597 daunorubicin metabolic process;GO:0030638 polyketide metabolic process;GO:0030647 aminoglycoside antibiotic metabolic process		Predicted intracellular proteins; Enzymes; ENZYME proteins:Oxidoreductases	Cytosol (Supported)				0.0	0.0	0.0	0.0	1.0	0.0	0.0	0.0	0.0	0.0	0.0	0.0	0.0	0.0	0.0	0.0	0.0	0.0	0.0	0.0
ALDH4A1	8659	symbol	H. sapiens	8659	H. sapiens	ALDH4A1	aldehyde dehydrogenase 4 family member A1	GO:0010133 proline catabolic process to glutamate;GO:0006562 proline catabolic process;GO:0019470 4-hydroxyproline catabolic process		Predicted intracellular proteins; Enzymes; ENZYME proteins:Oxidoreductases; Disease related genes; Potential drug targets	Mitochondria (Supported)	NADH			1.0	1.0	0.0	0.0	1.0	0.0	0.0	0.0	0.0	0.0	0.0	0.0	0.0	0.0	0.0	0.0	0.0	0.0	0.0	0.0
ALG1	56052	symbol	H. sapiens	56052	H. sapiens	ALG1	ALG1 chitobiosyldiphosphodolichol beta-mannosyltransferase	GO:0006488 dolichol-linked oligosaccharide biosynthetic process;GO:0006490 oligosaccharide-lipid intermediate biosynthetic process;GO:0097502 mannosylation		ENZYME proteins:Transferases; Predicted intracellular proteins; Enzymes; Disease related genes; Potential drug targets	Endoplasmic reticulum (Approved); Additional: Nucleoli fibrillar center			(M5937)HALLMARK GLYCOLYSIS	0.0	0.0	0.0	0.0	0.0	0.0	0.0	0.0	0.0	0.0	0.0	0.0	0.0	0.0	0.0	0.0	0.0	0.0	0.0	0.0
ALG12	79087	symbol	H. sapiens	79087	H. sapiens	ALG12	ALG12 alpha-1,6-mannosyltransferase	GO:0006488 dolichol-linked oligosaccharide biosynthetic process;GO:0006490 oligosaccharide-lipid intermediate biosynthetic process;GO:0097502 mannosylation		ENZYME proteins:Transferases; Potential drug targets; Enzymes; Disease related genes	Endoplasmic reticulum (Approved)				0.0	0.0	0.0	0.0	0.0	0.0	0.0	0.0	0.0	0.0	0.0	0.0	0.0	0.0	0.0	0.0	0.0	0.0	0.0	0.0
ALKBH5	54890	symbol	H. sapiens	54890	H. sapiens	ALKBH5	alkB homolog 5, RNA demethylase	GO:0035553 oxidative single-stranded RNA demethylation;GO:0035513 oxidative RNA demethylation;GO:0070989 oxidative demethylation		Predicted intracellular proteins	Cytosol;Nucleoplasm (Approved); Additional: Golgi apparatus				0.0	1.0	0.0	0.0	0.0	0.0	0.0	0.0	0.0	0.0	0.0	0.0	0.0	0.0	0.0	0.0	0.0	0.0	0.0	0.0
ALKBH6	84964	symbol	H. sapiens	84964	H. sapiens	ALKBH6	alkB homolog 6			Cancer-related genes:Mutated cancer genes; Predicted intracellular proteins	Nucleoplasm (Supported); Additional: Focal adhesion sites				0.0	0.0	0.0	0.0	0.0	0.0	0.0	0.0	0.0	0.0	0.0	0.0	0.0	0.0	0.0	0.0	0.0	0.0	0.0	0.0
ALKBH7	84266	symbol	H. sapiens	84266	H. sapiens	ALKBH7	alkB homolog 7	GO:1902445 regulation of mitochondrial membrane permeability involved in programmed necrotic cell death;GO:0097300 programmed necrotic cell death;GO:0010883 regulation of lipid storage		Predicted intracellular proteins	Mitochondria (Supported)				0.0	0.0	0.0	1.0	0.0	0.0	0.0	0.0	0.0	0.0	0.0	0.0	0.0	0.0	0.0	0.0	0.0	0.0	0.0	0.0
AMFR	267	symbol	H. sapiens	267	H. sapiens	AMFR	autocrine motility factor receptor	GO:2000638 regulation of SREBP signaling pathway;GO:1904380 endoplasmic reticulum mannose trimming;GO:0032933 SREBP signaling pathway		ENZYME proteins:Transferases; Predicted intracellular proteins; Enzymes	Endoplasmic reticulum;Golgi apparatus (Supported)			(M5906)HALLMARK ESTROGEN RESPONSE EARLY; (M5907)HALLMARK ESTROGEN RESPONSE LATE	0.0	0.0	0.0	0.0	0.0	0.0	0.0	0.0	0.0	0.0	0.0	0.0	0.0	1.0	0.0	1.0	1.0	0.0	0.0	0.0
AMIGO3	386724	symbol	H. sapiens	386724	H. sapiens	AMIGO3	adhesion molecule with Ig like domain 3	GO:0007157 heterophilic cell-cell adhesion via plasma membrane cell adhesion molecules;GO:0051965 positive regulation of synapse assembly;GO:0051963 regulation of synapse assembly							0.0	0.0	0.0	0.0	0.0	0.0	0.0	0.0	0.0	0.0	0.0	0.0	0.0	0.0	0.0	0.0	0.0	0.0	0.0	0.0
AMOTL2	51421	symbol	H. sapiens	51421	H. sapiens	AMOTL2	angiomotin like 2	GO:0003365 establishment of cell polarity involved in ameboidal cell migration;GO:0035329 hippo signaling;GO:0030010 establishment of cell polarity		Predicted intracellular proteins	Cell Junctions (Approved)				0.0	0.0	0.0	0.0	0.0	0.0	0.0	0.0	0.0	0.0	0.0	0.0	0.0	0.0	0.0	1.0	0.0	0.0	0.0	0.0
ANGPT2	285	symbol	H. sapiens	285	H. sapiens	ANGPT2	angiopoietin 2	GO:0050928 negative regulation of positive chemotaxis;GO:0048014 Tie signaling pathway;GO:0072012 glomerulus vasculature development		Cancer-related genes:Candidate cancer biomarkers; Predicted secreted proteins; RAS pathway related proteins			(M92)PID ANGIOPOIETIN RECEPTOR PATHWAY; (M5883)NABA SECRETED FACTORS; (M5885)NABA MATRISOME ASSOCIATED		0.0	0.0	0.0	0.0	0.0	0.0	0.0	0.0	0.0	0.0	0.0	0.0	0.0	0.0	0.0	0.0	0.0	0.0	0.0	0.0
ANGPTL3	27329	symbol	H. sapiens	27329	H. sapiens	ANGPTL3	angiopoietin like 3	GO:0051005 negative regulation of lipoprotein lipase activity;GO:0010519 negative regulation of phospholipase activity;GO:0055091 phospholipid homeostasis		Predicted secreted proteins; Disease related genes			(M160)PID AVB3 INTEGRIN PATHWAY; (M5883)NABA SECRETED FACTORS; (M5885)NABA MATRISOME ASSOCIATED	(M5934)HALLMARK XENOBIOTIC METABOLISM	0.0	1.0	0.0	0.0	0.0	0.0	0.0	0.0	0.0	0.0	0.0	0.0	0.0	0.0	0.0	0.0	0.0	0.0	0.0	1.0
ANK3	288	symbol	H. sapiens	288	H. sapiens	ANK3	ankyrin 3	GO:1900827 positive regulation of membrane depolarization during cardiac muscle cell action potential;GO:0072658 maintenance of protein location in membrane;GO:0072660 maintenance of protein location in plasma membrane		Cancer-related genes:Mutated cancer genes; Predicted intracellular proteins; Disease related genes	Plasma membrane (Supported)				1.0	0.0	0.0	1.0	0.0	0.0	0.0	0.0	0.0	0.0	0.0	0.0	0.0	0.0	0.0	0.0	0.0	0.0	0.0	0.0
ANKRD1	27063	symbol	H. sapiens	27063	H. sapiens	ANKRD1	ankyrin repeat domain 1	GO:0043517 positive regulation of DNA damage response, signal transduction by p53 class mediator;GO:0035994 response to muscle stretch;GO:1901798 positive regulation of signal transduction by p53 class mediator		Predicted intracellular proteins; Disease related genes	Nucleoli fibrillar center (Approved); Additional: Nucleoplasm				0.0	0.0	0.0	0.0	0.0	0.0	0.0	0.0	0.0	0.0	1.0	0.0	0.0	0.0	0.0	0.0	1.0	0.0	0.0	0.0
ANKRD13B	124930	symbol	H. sapiens	124930	H. sapiens	ANKRD13B	ankyrin repeat domain 13B	GO:0002091 negative regulation of receptor internalization;GO:0048261 negative regulation of receptor-mediated endocytosis;GO:0045806 negative regulation of endocytosis		Predicted intracellular proteins	Vesicles (Supported)				0.0	0.0	0.0	0.0	0.0	0.0	0.0	0.0	0.0	0.0	0.0	0.0	0.0	0.0	0.0	0.0	0.0	0.0	0.0	0.0
ANKRD13D	338692	symbol	H. sapiens	338692	H. sapiens	ANKRD13D	ankyrin repeat domain 13D	GO:0002091 negative regulation of receptor internalization;GO:0048261 negative regulation of receptor-mediated endocytosis;GO:0045806 negative regulation of endocytosis		Predicted intracellular proteins	Nucleoplasm (Approved); Additional: Mitochondria				0.0	0.0	0.0	0.0	0.0	0.0	0.0	0.0	0.0	0.0	0.0	0.0	0.0	0.0	0.0	0.0	0.0	0.0	0.0	0.0
ANKRD30BL	554226	symbol	H. sapiens	554226	H. sapiens	ANKRD30BL	ankyrin repeat domain 30B like			Predicted intracellular proteins					0.0	0.0	0.0	0.0	0.0	0.0	0.0	0.0	0.0	0.0	0.0	0.0	0.0	0.0	0.0	0.0	0.0	0.0	0.0	0.0
ANKRD37	353322	symbol	H. sapiens	353322	H. sapiens	ANKRD37	ankyrin repeat domain 37			Predicted intracellular proteins	Cytosol;Nucleoplasm (Supported); Additional: Mitochondria				0.0	0.0	0.0	0.0	0.0	0.0	0.0	0.0	0.0	0.0	0.0	0.0	0.0	0.0	0.0	0.0	0.0	0.0	0.0	0.0
ANKRD54	129138	symbol	H. sapiens	129138	H. sapiens	ANKRD54	ankyrin repeat domain 54	GO:0045648 positive regulation of erythrocyte differentiation;GO:0045646 regulation of erythrocyte differentiation;GO:0045639 positive regulation of myeloid cell differentiation		Predicted intracellular proteins	Microtubules;Midbody (Approved); Additional: Nucleoplasm				0.0	0.0	0.0	0.0	0.0	0.0	1.0	0.0	0.0	0.0	0.0	0.0	0.0	0.0	0.0	0.0	0.0	0.0	0.0	0.0
ANKRD63	100131244	symbol	H. sapiens	100131244	H. sapiens	ANKRD63	ankyrin repeat domain 63			Predicted intracellular proteins	Mitochondria (Approved)				0.0	0.0	0.0	0.0	0.0	0.0	0.0	0.0	0.0	0.0	0.0	0.0	0.0	0.0	0.0	0.0	0.0	0.0	0.0	0.0
ANKRD9	122416	symbol	H. sapiens	122416	H. sapiens	ANKRD9	ankyrin repeat domain 9	GO:0006878 cellular copper ion homeostasis;GO:0055070 copper ion homeostasis;GO:0046916 cellular transition metal ion homeostasis		Predicted intracellular proteins					0.0	0.0	0.0	0.0	0.0	0.0	0.0	0.0	0.0	0.0	0.0	0.0	0.0	1.0	0.0	0.0	0.0	0.0	0.0	0.0
ANKS1A	23294	symbol	H. sapiens	23294	H. sapiens	ANKS1A	ankyrin repeat and sterile alpha motif domain containing 1A	GO:1901187 regulation of ephrin receptor signaling pathway;GO:0016322 neuron remodeling;GO:0006929 substrate-dependent cell migration		Predicted intracellular proteins	Nucleoplasm (Approved); Additional: Cytosol				0.0	0.0	0.0	0.0	0.0	0.0	0.0	0.0	0.0	0.0	0.0	0.0	0.0	0.0	0.0	0.0	0.0	0.0	0.0	0.0
ANKS3	124401	symbol	H. sapiens	124401	H. sapiens	ANKS3	ankyrin repeat and sterile alpha motif domain containing 3			Predicted intracellular proteins	Nucleoplasm (Approved); Additional: Cytosol				0.0	0.0	0.0	0.0	0.0	0.0	0.0	0.0	0.0	0.0	0.0	0.0	0.0	0.0	0.0	0.0	0.0	0.0	0.0	0.0
ANOS1	3730	symbol	H. sapiens	3730	H. sapiens	ANOS1	anosmin 1	GO:0007411 axon guidance;GO:0097485 neuron projection guidance;GO:0010951 negative regulation of endopeptidase activity		Predicted secreted proteins; Disease related genes			(M3008)NABA ECM GLYCOPROTEINS; (M5884)NABA CORE MATRISOME; (M5889)NABA MATRISOME		0.0	0.0	0.0	0.0	0.0	0.0	0.0	0.0	0.0	0.0	0.0	0.0	0.0	0.0	0.0	0.0	0.0	0.0	0.0	0.0
ANXA10	11199	symbol	H. sapiens	11199	H. sapiens	ANXA10	annexin A10			Predicted intracellular proteins	Nucleoli;Nucleoplasm (Approved); Additional: Vesicles		(M5880)NABA ECM AFFILIATED; (M5885)NABA MATRISOME ASSOCIATED; (M5889)NABA MATRISOME	(M5953)HALLMARK KRAS SIGNALING UP	0.0	0.0	0.0	0.0	0.0	0.0	0.0	0.0	0.0	0.0	0.0	0.0	0.0	0.0	0.0	0.0	0.0	0.0	0.0	0.0
ANXA2P2	304	symbol	H. sapiens	304	H. sapiens	ANXA2P2	annexin A2 pseudogene 2	GO:0070588 calcium ion transmembrane transport;GO:0006816 calcium ion transport;GO:0043086 negative regulation of catalytic activity							0.0	0.0	0.0	0.0	0.0	0.0	0.0	0.0	0.0	0.0	0.0	0.0	0.0	0.0	0.0	0.0	0.0	0.0	0.0	0.0
AP1S3	130340	symbol	H. sapiens	130340	H. sapiens	AP1S3	adaptor related protein complex 1 subunit sigma 3	GO:0006605 protein targeting;GO:0006886 intracellular protein transport;GO:0046907 intracellular transport		Predicted intracellular proteins; Disease related genes	Vesicles (Supported)				0.0	0.0	0.0	1.0	0.0	0.0	0.0	0.0	0.0	0.0	0.0	0.0	0.0	0.0	0.0	0.0	0.0	1.0	0.0	0.0
AP2S1	1175	symbol	H. sapiens	1175	H. sapiens	AP2S1	adaptor related protein complex 2 subunit sigma 1	GO:0048268 clathrin coat assembly;GO:0072583 clathrin-dependent endocytosis;GO:0030100 regulation of endocytosis		Predicted intracellular proteins; Disease related genes				(M5910)HALLMARK PROTEIN SECRETION; (M5941)HALLMARK UV RESPONSE UP	1.0	1.0	0.0	0.0	1.0	0.0	0.0	0.0	0.0	0.0	0.0	0.0	1.0	0.0	0.0	0.0	0.0	1.0	0.0	0.0
AP3D1	8943	symbol	H. sapiens	8943	H. sapiens	AP3D1	adaptor related protein complex 3 subunit delta 1	GO:0016182 synaptic vesicle budding from endosome;GO:0051138 positive regulation of NK T cell differentiation;GO:0061088 regulation of sequestering of zinc ion		Predicted intracellular proteins; Disease related genes	Cytosol (Approved)				0.0	0.0	0.0	1.0	0.0	0.0	1.0	0.0	0.0	0.0	0.0	0.0	0.0	0.0	0.0	0.0	0.0	0.0	0.0	0.0
AP3S2	10239	symbol	H. sapiens	10239	H. sapiens	AP3S2	adaptor related protein complex 3 subunit sigma 2	GO:0048490 anterograde synaptic vesicle transport;GO:0099514 synaptic vesicle cytoskeletal transport;GO:0099517 synaptic vesicle transport along microtubule		Predicted intracellular proteins	Vesicles (Approved)				0.0	0.0	0.0	0.0	0.0	0.0	0.0	0.0	0.0	0.0	0.0	0.0	0.0	0.0	0.0	0.0	0.0	0.0	0.0	0.0
AP5S1	55317	symbol	H. sapiens	55317	H. sapiens	AP5S1	adaptor related protein complex 5 subunit sigma 1	GO:0000724 double-strand break repair via homologous recombination;GO:0000725 recombinational repair;GO:0016197 endosomal transport		Predicted intracellular proteins	Cytosol;Nucleoplasm (Enhanced)				0.0	0.0	0.0	0.0	0.0	0.0	0.0	0.0	0.0	0.0	0.0	0.0	0.0	0.0	0.0	0.0	0.0	0.0	0.0	0.0
APBA2	321	symbol	H. sapiens	321	H. sapiens	APBA2	amyloid beta precursor protein binding family A member 2	GO:0007268 chemical synaptic transmission;GO:0098916 anterograde trans-synaptic signaling;GO:0099537 trans-synaptic signaling		Predicted intracellular proteins	Golgi apparatus (Enhanced)				0.0	0.0	0.0	0.0	0.0	0.0	0.0	0.0	0.0	0.0	0.0	0.0	0.0	0.0	0.0	0.0	0.0	0.0	0.0	0.0
APC2	10297	symbol	H. sapiens	10297	H. sapiens	APC2	APC regulator of WNT signaling pathway 2	GO:0007026 negative regulation of microtubule depolymerization;GO:0031114 regulation of microtubule depolymerization;GO:0031111 negative regulation of microtubule polymerization or depolymerization		Predicted intracellular proteins; Disease related genes	Cytokinetic bridge;Midbody (Supported); Additional: Cytosol				0.0	0.0	0.0	0.0	0.0	0.0	0.0	0.0	0.0	0.0	0.0	0.0	0.0	0.0	0.0	1.0	0.0	0.0	0.0	1.0
APEH	327	symbol	H. sapiens	327	H. sapiens	APEH	acylaminoacyl-peptide hydrolase	GO:0006415 translational termination;GO:0050435 amyloid-beta metabolic process;GO:0043624 cellular protein complex disassembly		Predicted intracellular proteins; Peptidases:Serine-type peptidases; ENZYME proteins:Hydrolases; Enzymes	Cytosol (Enhanced)				1.0	0.0	0.0	0.0	0.0	0.0	0.0	0.0	0.0	0.0	0.0	0.0	0.0	0.0	0.0	0.0	0.0	0.0	0.0	0.0
APOA1BP	128240	gene_synonym	H. sapiens	128240	H. sapiens	NAXE	NAD(P)HX epimerase	GO:0031580 membrane raft distribution;GO:0051665 membrane raft localization;GO:0031579 membrane raft organization		ENZYME proteins:Isomerase; Predicted secreted proteins; Enzymes; Disease related genes; Potential drug targets	Nucleoplasm (Approved); Additional: Cytosol;Vesicles				0.0	0.0	0.0	0.0	0.0	0.0	0.0	0.0	0.0	0.0	0.0	0.0	0.0	0.0	0.0	0.0	0.0	0.0	0.0	0.0
APOL2	23780	symbol	H. sapiens	23780	H. sapiens	APOL2	apolipoprotein L2	GO:0006953 acute-phase response;GO:0060135 maternal process involved in female pregnancy;GO:0002526 acute inflammatory response		Cancer-related genes:Mutated cancer genes; Predicted intracellular proteins					0.0	0.0	0.0	0.0	0.0	0.0	0.0	0.0	0.0	0.0	0.0	0.0	0.0	0.0	0.0	0.0	0.0	0.0	0.0	0.0
ARFGAP1	55738	symbol	H. sapiens	55738	H. sapiens	ARFGAP1	ADP ribosylation factor GTPase activating protein 1	GO:0032012 regulation of ARF protein signal transduction;GO:0032011 ARF protein signal transduction;GO:0046578 regulation of Ras protein signal transduction		Predicted intracellular proteins	Golgi apparatus;Vesicles (Supported); Additional: Nuclear membrane		(M243)PID ARF 3PATHWAY	(M5922)HALLMARK UNFOLDED PROTEIN RESPONSE	1.0	0.0	0.0	0.0	0.0	0.0	0.0	0.0	0.0	0.0	0.0	0.0	0.0	0.0	0.0	0.0	0.0	0.0	0.0	0.0
ARFRP1	10139	symbol	H. sapiens	10139	H. sapiens	ARFRP1	ADP ribosylation factor related protein 1	GO:0034067 protein localization to Golgi apparatus;GO:0043001 Golgi to plasma membrane protein transport;GO:0006893 Golgi to plasma membrane transport		Predicted intracellular proteins	Golgi apparatus (Supported)				0.0	0.0	0.0	0.0	0.0	0.0	0.0	0.0	0.0	0.0	0.0	0.0	0.0	0.0	0.0	0.0	0.0	0.0	0.0	0.0
ARHGAP10	79658	symbol	H. sapiens	79658	H. sapiens	ARHGAP10	Rho GTPase activating protein 10	GO:0051056 regulation of small GTPase mediated signal transduction;GO:0007264 small GTPase mediated signal transduction;GO:0043066 negative regulation of apoptotic process		Predicted intracellular proteins	Nucleoplasm (Approved); Additional: Cytosol;Nuclear membrane			(M5893)HALLMARK MITOTIC SPINDLE	0.0	1.0	0.0	0.0	0.0	0.0	0.0	0.0	0.0	0.0	0.0	0.0	0.0	0.0	0.0	0.0	0.0	1.0	0.0	0.0
ARHGAP23	57636	symbol	H. sapiens	57636	H. sapiens	ARHGAP23	Rho GTPase activating protein 23	GO:0051056 regulation of small GTPase mediated signal transduction;GO:0007264 small GTPase mediated signal transduction;GO:1902531 regulation of intracellular signal transduction		Predicted intracellular proteins	Nucleoplasm;Plasma membrane (Approved); Additional: Cytosol				0.0	1.0	0.0	0.0	0.0	0.0	0.0	0.0	0.0	0.0	0.0	0.0	0.0	0.0	0.0	0.0	0.0	0.0	0.0	0.0
ARHGAP39	80728	symbol	H. sapiens	80728	H. sapiens	ARHGAP39	Rho GTPase activating protein 39	GO:0099173 postsynapse organization;GO:0051056 regulation of small GTPase mediated signal transduction;GO:0050808 synapse organization		Predicted intracellular proteins	Cytosol (Approved); Additional: Cytokinetic bridge;Microtubules;Nucleoplasm				1.0	1.0	0.0	0.0	0.0	0.0	0.0	0.0	0.0	0.0	0.0	0.0	0.0	0.0	0.0	0.0	0.0	0.0	0.0	0.0
ARHGAP9	64333	symbol	H. sapiens	64333	H. sapiens	ARHGAP9	Rho GTPase activating protein 9	GO:0051056 regulation of small GTPase mediated signal transduction;GO:0043087 regulation of GTPase activity;GO:0007264 small GTPase mediated signal transduction		Predicted intracellular proteins	Plasma membrane (Approved); Additional: Cell Junctions		(M241)PID RAC1 REG PATHWAY; (M68)PID RHOA REG PATHWAY		0.0	1.0	0.0	0.0	0.0	0.0	0.0	0.0	0.0	0.0	0.0	0.0	0.0	0.0	0.0	0.0	0.0	0.0	0.0	0.0
ARHGEF18	23370	symbol	H. sapiens	23370	H. sapiens	ARHGEF18	Rho/Rac guanine nucleotide exchange factor 18	GO:0150105 protein localization to cell-cell junction;GO:0051497 negative regulation of stress fiber assembly;GO:0032232 negative regulation of actin filament bundle assembly		Predicted intracellular proteins; Disease related genes	Cytosol (Enhanced)		(M68)PID RHOA REG PATHWAY		0.0	1.0	0.0	0.0	0.0	0.0	0.0	0.0	0.0	0.0	0.0	0.0	0.0	0.0	0.0	0.0	0.0	0.0	0.0	0.0
ARHGEF2	9181	symbol	H. sapiens	9181	H. sapiens	ARHGEF2	Rho/Rac guanine nucleotide exchange factor 2	GO:1902219 negative regulation of intrinsic apoptotic signaling pathway in response to osmotic stress;GO:1902218 regulation of intrinsic apoptotic signaling pathway in response to osmotic stress;GO:0055059 asymmetric neuroblast division		Predicted intracellular proteins; Disease related genes			(M69)PID REELIN PATHWAY; (M241)PID RAC1 REG PATHWAY; (M68)PID RHOA REG PATHWAY	(M5893)HALLMARK MITOTIC SPINDLE	0.0	1.0	0.0	0.0	0.0	0.0	0.0	0.0	0.0	0.0	0.0	1.0	0.0	0.0	0.0	0.0	1.0	0.0	0.0	0.0
ARID3B	10620	symbol	H. sapiens	10620	H. sapiens	ARID3B	AT-rich interaction domain 3B	GO:0045944 positive regulation of transcription by RNA polymerase II;GO:0045893 positive regulation of transcription, DNA-templated;GO:1903508 positive regulation of nucleic acid-templated transcription		Predicted intracellular proteins; Transcription factors:Helix-turn-helix domains	Nucleoplasm (Supported)				0.0	0.0	0.0	0.0	0.0	0.0	0.0	0.0	0.0	0.0	0.0	0.0	0.0	0.0	0.0	0.0	0.0	0.0	0.0	0.0
ARIH2OS	646450	symbol	H. sapiens	646450	H. sapiens	ARIH2OS	ARIH2 opposite strand lncRNA								0.0	0.0	0.0	0.0	0.0	0.0	0.0	0.0	0.0	0.0	0.0	0.0	0.0	0.0	0.0	0.0	0.0	0.0	0.0	0.0
ARL17A	51326	symbol	H. sapiens	51326	H. sapiens	ARL17A	ADP ribosylation factor like GTPase 17A			Predicted intracellular proteins					0.0	0.0	0.0	0.0	0.0	0.0	0.0	0.0	0.0	0.0	0.0	0.0	0.0	0.0	0.0	0.0	0.0	0.0	0.0	0.0
ARL6IP4	51329	symbol	H. sapiens	51329	H. sapiens	ARL6IP4	ADP ribosylation factor like GTPase 6 interacting protein 4	GO:0008380 RNA splicing;GO:0006397 mRNA processing;GO:0016071 mRNA metabolic process		Predicted intracellular proteins	Nucleoplasm (Approved); Additional: Mitochondria				0.0	0.0	0.0	0.0	0.0	0.0	0.0	0.0	0.0	0.0	0.0	0.0	0.0	0.0	0.0	0.0	0.0	0.0	0.0	0.0
ARL8A	127829	symbol	H. sapiens	127829	H. sapiens	ARL8A	ADP ribosylation factor like GTPase 8A	GO:0008089 anterograde axonal transport;GO:0098930 axonal transport;GO:0008088 axo-dendritic transport		Predicted intracellular proteins				(M5893)HALLMARK MITOTIC SPINDLE	0.0	0.0	0.0	0.0	0.0	0.0	0.0	0.0	0.0	0.0	0.0	0.0	0.0	0.0	0.0	0.0	0.0	0.0	0.0	0.0
ARMC10	83787	symbol	H. sapiens	83787	H. sapiens	ARMC10	armadillo repeat containing 10	GO:1902254 negative regulation of intrinsic apoptotic signaling pathway by p53 class mediator;GO:1902253 regulation of intrinsic apoptotic signaling pathway by p53 class mediator;GO:1901797 negative regulation of signal transduction by p53 class mediator		Predicted intracellular proteins	Mitochondria (Enhanced)				0.0	0.0	0.0	0.0	0.0	0.0	0.0	0.0	0.0	0.0	0.0	1.0	0.0	0.0	0.0	0.0	0.0	0.0	0.0	0.0
ARMC5	79798	symbol	H. sapiens	79798	H. sapiens	ARMC5	armadillo repeat containing 5	GO:0035801 adrenal cortex development;GO:0030325 adrenal gland development;GO:0050810 regulation of steroid biosynthetic process		Predicted intracellular proteins; Disease related genes	Cytosol;Nucleoplasm (Approved); Additional: Focal adhesion sites				0.0	0.0	0.0	0.0	0.0	0.0	0.0	0.0	0.0	0.0	0.0	0.0	0.0	0.0	0.0	0.0	0.0	0.0	0.0	0.0
ARMCX6	54470	symbol	H. sapiens	54470	H. sapiens	ARMCX6	armadillo repeat containing X-linked 6				Cytosol (Supported); Additional: Nuclear membrane;Nucleoplasm				0.0	0.0	0.0	0.0	0.0	0.0	0.0	0.0	0.0	0.0	0.0	0.0	0.0	0.0	0.0	0.0	0.0	0.0	0.0	0.0
ARPC1B	10095	symbol	H. sapiens	10095	H. sapiens	ARPC1B	actin related protein 2/3 complex subunit 1B	GO:0034314 Arp2/3 complex-mediated actin nucleation;GO:0045010 actin nucleation;GO:0043627 response to estrogen		Predicted intracellular proteins; Disease related genes	Cytosol;Vesicles (Supported)	N-[2-(2-methyl-1H-indol-3-yl)ethyl]thiophene-2-carboxamide; (2S)-2-(3-bromophenyl)-3-(5-chloro-2-hydroxyphenyl)-1,3-thiazolidin-4-one	(M278)PID RAC1 PATHWAY; (M81)PID CDC42 PATHWAY; (M164)PID ERBB1 DOWNSTREAM PATHWAY		1.0	1.0	0.0	0.0	0.0	0.0	0.0	0.0	0.0	0.0	0.0	0.0	0.0	0.0	0.0	0.0	0.0	0.0	0.0	0.0
ARPC4	10093	symbol	H. sapiens	10093	H. sapiens	ARPC4	actin related protein 2/3 complex subunit 4	GO:0034314 Arp2/3 complex-mediated actin nucleation;GO:0045010 actin nucleation;GO:0030838 positive regulation of actin filament polymerization		Predicted intracellular proteins		N-[2-(2-methyl-1H-indol-3-yl)ethyl]thiophene-2-carboxamide; (2S)-2-(3-bromophenyl)-3-(5-chloro-2-hydroxyphenyl)-1,3-thiazolidin-4-one	(M278)PID RAC1 PATHWAY; (M81)PID CDC42 PATHWAY; (M164)PID ERBB1 DOWNSTREAM PATHWAY		1.0	1.0	0.0	0.0	0.0	0.0	0.0	0.0	0.0	0.0	0.0	0.0	0.0	0.0	0.0	0.0	0.0	0.0	0.0	0.0
ARRDC3-AS1	100129716	symbol	H. sapiens	100129716	H. sapiens	ARRDC3-AS1	ARRDC3 antisense RNA 1								0.0	0.0	0.0	0.0	0.0	0.0	0.0	0.0	0.0	0.0	0.0	0.0	0.0	0.0	0.0	0.0	0.0	0.0	0.0	0.0
ARVCF	421	symbol	H. sapiens	421	H. sapiens	ARVCF	ARVCF delta catenin family member	GO:0016339 calcium-dependent cell-cell adhesion via plasma membrane cell adhesion molecules;GO:0007043 cell-cell junction assembly;GO:0045216 cell-cell junction organization		Predicted intracellular proteins	Cell Junctions;Plasma membrane (Enhanced)				0.0	1.0	0.0	0.0	0.0	0.0	0.0	0.0	0.0	0.0	0.0	0.0	0.0	0.0	0.0	0.0	0.0	0.0	0.0	0.0
AS3MT	57412	symbol	H. sapiens	57412	H. sapiens	AS3MT	arsenite methyltransferase	GO:0018872 arsonoacetate metabolic process;GO:0009404 toxin metabolic process;GO:0019748 secondary metabolic process		ENZYME proteins:Transferases; Predicted intracellular proteins; Enzymes	Mitochondria (Approved)	Ademetionine			0.0	0.0	0.0	0.0	0.0	0.0	0.0	0.0	0.0	0.0	0.0	0.0	0.0	0.0	0.0	0.0	0.0	0.0	0.0	0.0
ASAP1-IT1	29065	symbol	H. sapiens	29065	H. sapiens	ASAP1-IT1	ASAP1 intronic transcript 1								0.0	0.0	0.0	0.0	0.0	0.0	0.0	0.0	0.0	0.0	0.0	0.0	0.0	0.0	0.0	0.0	0.0	0.0	0.0	0.0
ASAP1-IT2	100507117	symbol	H. sapiens	100507117	H. sapiens	ASAP1-IT2	ASAP1 intronic transcript 2								0.0	0.0	0.0	0.0	0.0	0.0	0.0	0.0	0.0	0.0	0.0	0.0	0.0	0.0	0.0	0.0	0.0	0.0	0.0	0.0
ASB1	51665	symbol	H. sapiens	51665	H. sapiens	ASB1	ankyrin repeat and SOCS box containing 1	GO:0030539 male genitalia development;GO:0048806 genitalia development;GO:0046661 male sex differentiation		Predicted intracellular proteins	Nucleoplasm (Approved)				0.0	0.0	0.0	0.0	0.0	0.0	0.0	0.0	0.0	0.0	0.0	0.0	0.0	1.0	0.0	0.0	0.0	0.0	0.0	0.0
ASB2	51676	symbol	H. sapiens	51676	H. sapiens	ASB2	ankyrin repeat and SOCS box containing 2	GO:0071800 podosome assembly;GO:0036336 dendritic cell migration;GO:0001947 heart looping		Predicted intracellular proteins	Nucleoli fibrillar center (Approved); Additional: Cytosol;Nucleoplasm				0.0	0.0	0.0	0.0	0.0	0.0	0.0	0.0	0.0	0.0	1.0	0.0	0.0	1.0	0.0	0.0	0.0	0.0	0.0	0.0
ASB3	51130	symbol	H. sapiens	51130	H. sapiens	ASB3	ankyrin repeat and SOCS box containing 3	GO:0036371 protein localization to T-tubule;GO:0055117 regulation of cardiac muscle contraction;GO:0006942 regulation of striated muscle contraction		Predicted intracellular proteins					0.0	0.0	0.0	0.0	0.0	0.0	0.0	0.0	0.0	0.0	0.0	0.0	0.0	1.0	0.0	0.0	0.0	0.0	0.0	0.0
ASH1L-AS1	645676	symbol	H. sapiens	645676	H. sapiens	ASH1L-AS1	ASH1L antisense RNA 1								0.0	0.0	0.0	0.0	0.0	0.0	0.0	0.0	0.0	0.0	0.0	0.0	0.0	0.0	0.0	0.0	0.0	0.0	0.0	0.0
ASPSCR1	79058	symbol	H. sapiens	79058	H. sapiens	ASPSCR1	ASPSCR1 tether for SLC2A4, UBX domain containing	GO:0046324 regulation of glucose import;GO:0046323 glucose import;GO:0010827 regulation of glucose transmembrane transport		Predicted intracellular proteins; Disease related genes; Cancer-related genes	Nucleoplasm (Supported); Additional: Plasma membrane;Vesicles				0.0	0.0	0.0	0.0	0.0	0.0	0.0	1.0	0.0	0.0	0.0	0.0	0.0	0.0	0.0	0.0	0.0	0.0	0.0	0.0
ATF3	467	symbol	H. sapiens	467	H. sapiens	ATF3	activating transcription factor 3	GO:0061394 regulation of transcription from RNA polymerase II promoter in response to arsenic-containing substance;GO:1903984 positive regulation of TRAIL-activated apoptotic signaling pathway;GO:1903121 regulation of TRAIL-activated apoptotic signaling pathway		Predicted intracellular proteins; Transcription factors:Basic domains	Nucleoli;Nucleoplasm (Supported)		(M166)PID ATF2 PATHWAY; (M167)PID AP1 PATHWAY; (M2)PID SMAD2 3NUCLEAR PATHWAY	(M5892)HALLMARK CHOLESTEROL HOMEOSTASIS; (M5922)HALLMARK UNFOLDED PROTEIN RESPONSE; (M5941)HALLMARK UV RESPONSE UP	1.0	0.0	0.0	0.0	0.0	0.0	0.0	0.0	0.0	0.0	1.0	1.0	0.0	0.0	0.0	0.0	0.0	0.0	0.0	0.0
ATF5	22809	symbol	H. sapiens	22809	H. sapiens	ATF5	activating transcription factor 5	GO:0021891 olfactory bulb interneuron development;GO:0021889 olfactory bulb interneuron differentiation;GO:0021924 cell proliferation in external granule layer		Predicted intracellular proteins; Transcription factors:Basic domains	Nucleoplasm (Supported); Additional: Cytosol		(M11)PID PRL SIGNALING EVENTS PATHWAY	(M5892)HALLMARK CHOLESTEROL HOMEOSTASIS; (M5901)HALLMARK G2M CHECKPOINT	1.0	0.0	0.0	0.0	0.0	0.0	0.0	0.0	0.0	0.0	0.0	0.0	0.0	0.0	0.0	0.0	0.0	0.0	0.0	0.0
ATG101	60673	symbol	H. sapiens	60673	H. sapiens	ATG101	autophagy related 101	GO:0000045 autophagosome assembly;GO:1905037 autophagosome organization;GO:0007033 vacuole organization		Predicted intracellular proteins; Transporters					0.0	0.0	0.0	0.0	0.0	0.0	0.0	0.0	0.0	0.0	0.0	0.0	0.0	0.0	0.0	0.0	0.0	0.0	0.0	0.0
ATG4D	84971	symbol	H. sapiens	84971	H. sapiens	ATG4D	autophagy related 4D cysteine peptidase	GO:0006914 autophagy;GO:0061919 process utilizing autophagic mechanism;GO:0015031 protein transport		Predicted intracellular proteins; Peptidases:Cysteine-type peptidases; Transporters; Enzymes	Mitochondria;Nucleoplasm (Supported)				0.0	0.0	0.0	0.0	0.0	0.0	0.0	0.0	0.0	0.0	0.0	0.0	0.0	0.0	0.0	0.0	0.0	0.0	0.0	0.0
ATP13A1	57130	symbol	H. sapiens	57130	H. sapiens	ATP13A1	ATPase 13A1	GO:0140569 extraction of mislocalized protein from ER membrane;GO:0140568 extraction of mislocalized protein from membrane;GO:0071421 manganese ion transmembrane transport		Predicted intracellular proteins; Transporters:Primary Active Transporters	Vesicles (Approved)				0.0	0.0	0.0	0.0	0.0	0.0	0.0	0.0	0.0	0.0	0.0	0.0	0.0	0.0	0.0	0.0	0.0	0.0	0.0	0.0
ATP13A2	23400	symbol	H. sapiens	23400	H. sapiens	ATP13A2	ATPase cation transporting 13A2	GO:1903710 spermine transmembrane transport;GO:0018217 peptidyl-aspartic acid phosphorylation;GO:1990938 peptidyl-aspartic acid autophosphorylation		Predicted intracellular proteins; Transporters:Primary Active Transporters; Potential drug targets; Disease related genes					0.0	0.0	0.0	1.0	0.0	0.0	0.0	0.0	0.0	0.0	0.0	0.0	0.0	0.0	0.0	0.0	0.0	0.0	0.0	1.0
ATP5D	513	gene_synonym	H. sapiens	513	H. sapiens	ATP5F1D	ATP synthase F1 subunit delta	GO:0033615 mitochondrial proton-transporting ATP synthase complex assembly;GO:0043461 proton-transporting ATP synthase complex assembly;GO:0070071 proton-transporting two-sector ATPase complex assembly		Predicted intracellular proteins		Isoflurane; Desflurane		(M5936)HALLMARK OXIDATIVE PHOSPHORYLATION	0.0	0.0	0.0	1.0	1.0	0.0	0.0	0.0	0.0	0.0	0.0	0.0	0.0	0.0	0.0	0.0	0.0	0.0	0.0	0.0
ATP5E	514	gene_synonym	H. sapiens	514	H. sapiens	ATP5F1E	ATP synthase F1 subunit epsilon	GO:0042776 mitochondrial ATP synthesis coupled proton transport;GO:0015985 energy coupled proton transport, down electrochemical gradient;GO:0015986 ATP synthesis coupled proton transport		Predicted intracellular proteins; Disease related genes				(M5936)HALLMARK OXIDATIVE PHOSPHORYLATION	0.0	0.0	0.0	1.0	1.0	0.0	0.0	0.0	0.0	0.0	0.0	0.0	0.0	0.0	0.0	0.0	0.0	0.0	0.0	0.0
ATP5I	521	gene_synonym	H. sapiens	521	H. sapiens	ATP5ME	ATP synthase membrane subunit e	GO:0042776 mitochondrial ATP synthesis coupled proton transport;GO:0015985 energy coupled proton transport, down electrochemical gradient;GO:0015986 ATP synthesis coupled proton transport		Predicted intracellular proteins	Mitochondria (Supported)	Phenethyl Isothiocyanate		(M5936)HALLMARK OXIDATIVE PHOSPHORYLATION	0.0	0.0	0.0	1.0	1.0	0.0	0.0	0.0	0.0	0.0	0.0	0.0	0.0	0.0	0.0	0.0	0.0	0.0	0.0	0.0
ATP5J2	9551	gene_synonym	H. sapiens	9551	H. sapiens	ATP5MF	ATP synthase membrane subunit f	GO:0042776 mitochondrial ATP synthesis coupled proton transport;GO:0015985 energy coupled proton transport, down electrochemical gradient;GO:0015986 ATP synthesis coupled proton transport		Predicted intracellular proteins	Mitochondria (Supported); Additional: Nuclear membrane			(M5936)HALLMARK OXIDATIVE PHOSPHORYLATION	0.0	0.0	0.0	1.0	1.0	0.0	0.0	0.0	0.0	0.0	0.0	0.0	0.0	0.0	0.0	0.0	0.0	0.0	0.0	0.0
ATP5L	10632	gene_synonym	H. sapiens	10632	H. sapiens	ATP5MG	ATP synthase membrane subunit g	GO:0042776 mitochondrial ATP synthesis coupled proton transport;GO:0015985 energy coupled proton transport, down electrochemical gradient;GO:0015986 ATP synthesis coupled proton transport		Predicted intracellular proteins	Mitochondria (Supported)	Artenimol; Phenethyl Isothiocyanate		(M5936)HALLMARK OXIDATIVE PHOSPHORYLATION	0.0	0.0	0.0	1.0	1.0	0.0	0.0	0.0	0.0	0.0	0.0	0.0	0.0	0.0	0.0	0.0	0.0	0.0	0.0	0.0
ATP6V0B	533	symbol	H. sapiens	533	H. sapiens	ATP6V0B	ATPase H+ transporting V0 subunit b	GO:0016241 regulation of macroautophagy;GO:1902600 proton transmembrane transport;GO:0016236 macroautophagy			Cytosol (Approved)			(M5936)HALLMARK OXIDATIVE PHOSPHORYLATION	1.0	0.0	0.0	0.0	1.0	0.0	0.0	0.0	0.0	0.0	0.0	0.0	0.0	0.0	0.0	0.0	0.0	0.0	0.0	0.0
ATP6V0D1	9114	symbol	H. sapiens	9114	H. sapiens	ATP6V0D1	ATPase H+ transporting V0 subunit d1	GO:0036295 cellular response to increased oxygen levels;GO:0007035 vacuolar acidification;GO:0036296 response to increased oxygen levels		Predicted intracellular proteins; Transporters:Primary Active Transporters				(M5922)HALLMARK UNFOLDED PROTEIN RESPONSE	1.0	1.0	0.0	0.0	1.0	0.0	0.0	0.0	0.0	0.0	0.0	0.0	1.0	0.0	0.0	0.0	0.0	0.0	0.0	0.0
ATP6V0E2	155066	symbol	H. sapiens	155066	H. sapiens	ATP6V0E2	ATPase H+ transporting V0 subunit e2	GO:0007035 vacuolar acidification;GO:0051452 intracellular pH reduction;GO:0045851 pH reduction							1.0	0.0	0.0	0.0	1.0	0.0	0.0	0.0	0.0	0.0	0.0	0.0	0.0	0.0	0.0	0.0	0.0	0.0	0.0	0.0
ATP6V1F	9296	symbol	H. sapiens	9296	H. sapiens	ATP6V1F	ATPase H+ transporting V1 subunit F	GO:1902600 proton transmembrane transport;GO:0098662 inorganic cation transmembrane transport;GO:0098660 inorganic ion transmembrane transport		Predicted intracellular proteins; Transporters:Primary Active Transporters				(M5941)HALLMARK UV RESPONSE UP; (M5936)HALLMARK OXIDATIVE PHOSPHORYLATION	1.0	0.0	0.0	0.0	1.0	0.0	0.0	0.0	0.0	0.0	0.0	0.0	0.0	0.0	0.0	0.0	0.0	0.0	0.0	0.0
ATPIF1	93974	gene_synonym	H. sapiens	93974	H. sapiens	ATP5IF1	ATP synthase inhibitory factor subunit 1	GO:1901030 positive regulation of mitochondrial outer membrane permeabilization involved in apoptotic signaling pathway;GO:0032780 negative regulation of ATPase activity;GO:1904925 positive regulation of autophagy of mitochondrion in response to mitochondrial depolarization		Predicted intracellular proteins	Mitochondria (Enhanced)				0.0	0.0	0.0	1.0	1.0	0.0	1.0	0.0	0.0	0.0	0.0	1.0	0.0	1.0	0.0	0.0	0.0	0.0	0.0	1.0
ATXN7	6314	symbol	H. sapiens	6314	H. sapiens	ATXN7	ataxin 7	GO:0016578 histone deubiquitination;GO:0007026 negative regulation of microtubule depolymerization;GO:0031114 regulation of microtubule depolymerization		Predicted intracellular proteins; Disease related genes	Cytosol;Nucleoplasm (Approved)				0.0	1.0	1.0	0.0	0.0	0.0	0.0	0.0	0.0	0.0	0.0	0.0	0.0	0.0	0.0	0.0	0.0	0.0	0.0	0.0
AVEN	57099	symbol	H. sapiens	57099	H. sapiens	AVEN	apoptosis and caspase activation inhibitor	GO:0010972 negative regulation of G2/M transition of mitotic cell cycle;GO:1902750 negative regulation of cell cycle G2/M phase transition;GO:0010389 regulation of G2/M transition of mitotic cell cycle		Predicted intracellular proteins	Actin filaments;Plasma membrane (Approved); Additional: Centrosome				0.0	0.0	0.0	0.0	0.0	0.0	0.0	0.0	0.0	0.0	0.0	0.0	0.0	0.0	0.0	0.0	0.0	1.0	0.0	0.0
AVPI1	60370	symbol	H. sapiens	60370	H. sapiens	AVPI1	arginine vasopressin induced 1	GO:0043410 positive regulation of MAPK cascade;GO:0043408 regulation of MAPK cascade;GO:0000165 MAPK cascade		Predicted intracellular proteins	Nucleoplasm;Plasma membrane (Approved)				0.0	0.0	0.0	0.0	0.0	0.0	0.0	0.0	0.0	0.0	0.0	0.0	0.0	0.0	0.0	0.0	0.0	0.0	0.0	0.0
AXIN1	8312	symbol	H. sapiens	8312	H. sapiens	AXIN1	axin 1	GO:0010800 positive regulation of peptidyl-threonine phosphorylation;GO:0051443 positive regulation of ubiquitin-protein transferase activity;GO:0010799 regulation of peptidyl-threonine phosphorylation		Predicted intracellular proteins; Disease related genes; Cancer-related genes	Nucleoli;Vesicles (Supported)	1,4-Dithiothreitol	(M31)PID BETA CATENIN DEG PATHWAY; (M90)PID WNT CANONICAL PATHWAY; (M139)PID MYC PATHWAY	(M5895)HALLMARK WNT BETA CATENIN SIGNALING	0.0	1.0	1.0	0.0	0.0	0.0	0.0	0.0	0.0	0.0	0.0	0.0	0.0	1.0	0.0	1.0	1.0	1.0	0.0	1.0
AZIN1-AS1	100506753	gene_synonym	H. sapiens	100506753	H. sapiens	MAILR	macrophage interferon regulatory lncRNA								0.0	0.0	0.0	0.0	0.0	0.0	0.0	0.0	0.0	0.0	0.0	0.0	0.0	0.0	0.0	0.0	0.0	0.0	0.0	0.0
B3GALT6	126792	symbol	H. sapiens	126792	H. sapiens	B3GALT6	beta-1,3-galactosyltransferase 6	GO:0030206 chondroitin sulfate biosynthetic process;GO:0050650 chondroitin sulfate proteoglycan biosynthetic process;GO:0015012 heparan sulfate proteoglycan biosynthetic process		ENZYME proteins:Transferases; Predicted intracellular proteins; Enzymes; Disease related genes; Potential drug targets				(M5891)HALLMARK HYPOXIA; (M5937)HALLMARK GLYCOLYSIS	0.0	0.0	0.0	0.0	0.0	0.0	0.0	0.0	0.0	0.0	0.0	0.0	0.0	0.0	0.0	0.0	0.0	0.0	0.0	0.0
B3GNT7	93010	symbol	H. sapiens	93010	H. sapiens	B3GNT7	UDP-GlcNAc:betaGal beta-1,3-N-acetylglucosaminyltransferase 7	GO:0030311 poly-N-acetyllactosamine biosynthetic process;GO:0030309 poly-N-acetyllactosamine metabolic process;GO:0018146 keratan sulfate biosynthetic process		Predicted intracellular proteins	Golgi apparatus (Approved); Additional: Cytosol;Mitotic spindle				0.0	0.0	0.0	0.0	0.0	0.0	0.0	0.0	0.0	0.0	0.0	0.0	0.0	0.0	0.0	0.0	0.0	0.0	0.0	0.0
B3GNT9	84752	symbol	H. sapiens	84752	H. sapiens	B3GNT9	UDP-GlcNAc:betaGal beta-1,3-N-acetylglucosaminyltransferase 9	GO:0030311 poly-N-acetyllactosamine biosynthetic process;GO:0030309 poly-N-acetyllactosamine metabolic process;GO:0033692 cellular polysaccharide biosynthetic process		Predicted intracellular proteins	Golgi apparatus (Approved); Additional: Nucleoli fibrillar center				0.0	0.0	0.0	0.0	0.0	0.0	0.0	0.0	0.0	0.0	0.0	0.0	0.0	0.0	0.0	0.0	0.0	0.0	0.0	0.0
B4GALNT4	338707	symbol	H. sapiens	338707	H. sapiens	B4GALNT4	beta-1,4-N-acetyl-galactosaminyltransferase 4			ENZYME proteins:Transferases; Predicted intracellular proteins; Enzymes	Cytosol;Nucleoplasm (Uncertain); Additional: Vesicles				0.0	0.0	0.0	0.0	0.0	0.0	0.0	0.0	0.0	0.0	0.0	0.0	0.0	0.0	0.0	0.0	0.0	0.0	0.0	0.0
B4GALT2	8704	symbol	H. sapiens	8704	H. sapiens	B4GALT2	beta-1,4-galactosyltransferase 2	GO:0021680 cerebellar Purkinje cell layer development;GO:0008542 visual learning;GO:0021695 cerebellar cortex development		ENZYME proteins:Transferases; Predicted intracellular proteins; Enzymes	Golgi apparatus;Vesicles (Supported)			(M5937)HALLMARK GLYCOLYSIS	0.0	0.0	0.0	0.0	0.0	0.0	0.0	0.0	0.0	0.0	0.0	0.0	0.0	0.0	0.0	0.0	0.0	0.0	0.0	0.0
B4GALT7	11285	symbol	H. sapiens	11285	H. sapiens	B4GALT7	beta-1,4-galactosyltransferase 7	GO:0048147 negative regulation of fibroblast proliferation;GO:0030166 proteoglycan biosynthetic process;GO:0006487 protein N-linked glycosylation		ENZYME proteins:Transferases; Predicted intracellular proteins; Enzymes; Disease related genes; Potential drug targets				(M5937)HALLMARK GLYCOLYSIS	0.0	0.0	0.0	0.0	0.0	0.0	0.0	0.0	0.0	0.0	0.0	0.0	0.0	0.0	0.0	0.0	0.0	0.0	0.0	0.0
B4GAT1	11041	symbol	H. sapiens	11041	H. sapiens	B4GAT1	beta-1,4-glucuronyltransferase 1	GO:0030311 poly-N-acetyllactosamine biosynthetic process;GO:0030309 poly-N-acetyllactosamine metabolic process;GO:0018146 keratan sulfate biosynthetic process		Predicted intracellular proteins; Disease related genes					0.0	0.0	0.0	0.0	0.0	0.0	0.0	0.0	0.0	0.0	0.0	0.0	0.0	0.0	0.0	0.0	0.0	0.0	0.0	0.0
BAG6	7917	symbol	H. sapiens	7917	H. sapiens	BAG6	BAG cochaperone 6	GO:1904327 protein localization to cytosolic proteasome complex;GO:1904379 protein localization to cytosolic proteasome complex involved in ERAD pathway;GO:0061857 endoplasmic reticulum stress-induced pre-emptive quality control		Predicted intracellular proteins	Cytosol;Nucleoplasm (Enhanced)				0.0	0.0	0.0	1.0	0.0	0.0	0.0	0.0	0.0	0.0	0.0	1.0	0.0	1.0	0.0	0.0	1.0	0.0	0.0	1.0
BAIAP3	8938	symbol	H. sapiens	8938	H. sapiens	BAIAP3	BAI1 associated protein 3	GO:1905413 regulation of dense core granule exocytosis;GO:1990502 dense core granule maturation;GO:0061792 secretory granule maturation		Predicted intracellular proteins					0.0	0.0	0.0	0.0	0.0	0.0	0.0	1.0	0.0	0.0	0.0	0.0	0.0	0.0	0.0	0.0	0.0	0.0	0.0	0.0
BAK1	578	symbol	H. sapiens	578	H. sapiens	BAK1	BCL2 antagonist/killer 1	GO:0002352 B cell negative selection;GO:0048597 post-embryonic camera-type eye morphogenesis;GO:0010046 response to mycotoxin		Transporters:Transporter channels and pores			(M13096)SA PROGRAMMED CELL DEATH; (M8873)ST FAS SIGNALING PATHWAY; (M19)PID P73PATHWAY	(M5897)HALLMARK IL6 JAK STAT3 SIGNALING; (M5941)HALLMARK UV RESPONSE UP; (M5939)HALLMARK P53 PATHWAY	0.0	1.0	0.0	1.0	1.0	0.0	0.0	1.0	0.0	0.0	0.0	1.0	0.0	0.0	0.0	0.0	1.0	1.0	1.0	1.0
BANP	54971	symbol	H. sapiens	54971	H. sapiens	BANP	BTG3 associated nuclear protein	GO:0042177 negative regulation of protein catabolic process;GO:0034504 protein localization to nucleus;GO:0009895 negative regulation of catabolic process		Predicted intracellular proteins	Nucleoplasm (Supported); Additional: Nuclear bodies				0.0	0.0	0.0	0.0	0.0	0.0	0.0	0.0	0.0	0.0	0.0	0.0	0.0	0.0	0.0	0.0	0.0	0.0	0.0	1.0
BARHL2	343472	symbol	H. sapiens	343472	H. sapiens	BARHL2	BarH like homeobox 2	GO:0001709 cell fate determination;GO:0030516 regulation of axon extension;GO:0061387 regulation of extent of cell growth		Predicted intracellular proteins; Transcription factors:Helix-turn-helix domains					1.0	0.0	0.0	0.0	0.0	0.0	0.0	0.0	0.0	0.0	0.0	0.0	0.0	0.0	0.0	0.0	0.0	0.0	0.0	0.0
BASP1	10409	symbol	H. sapiens	10409	H. sapiens	BASP1	brain abundant membrane attached signal protein 1	GO:2001074 regulation of metanephric ureteric bud development;GO:2001076 positive regulation of metanephric ureteric bud development;GO:0007356 thorax and anterior abdomen determination		Transporters:Transporter channels and pores; Predicted intracellular proteins	Plasma membrane (Enhanced)			(M5930)HALLMARK EPITHELIAL MESENCHYMAL TRANSITION	0.0	1.0	0.0	0.0	0.0	0.0	0.0	0.0	0.0	0.0	1.0	0.0	0.0	0.0	0.0	0.0	0.0	0.0	0.0	0.0
BATF3	55509	symbol	H. sapiens	55509	H. sapiens	BATF3	basic leucine zipper ATF-like transcription factor 3	GO:0043011 myeloid dendritic cell differentiation;GO:0001773 myeloid dendritic cell activation;GO:0097028 dendritic cell differentiation		Predicted intracellular proteins; Transcription factors:Basic domains	Nucleoli (Supported); Additional: Cytosol;Nucleoplasm		(M235)PID TCR CALCIUM PATHWAY; (M60)PID NFAT TFPATHWAY	(M5947)HALLMARK IL2 STAT5 SIGNALING	0.0	0.0	0.0	0.0	0.0	0.0	1.0	0.0	0.0	0.0	0.0	0.0	0.0	0.0	0.0	0.0	0.0	0.0	0.0	0.0
BBC3	27113	symbol	H. sapiens	27113	H. sapiens	BBC3	BCL2 binding component 3	GO:1900739 regulation of protein insertion into mitochondrial membrane involved in apoptotic signaling pathway;GO:1900740 positive regulation of protein insertion into mitochondrial membrane involved in apoptotic signaling pathway;GO:0001844 protein insertion into mitochondrial membrane involved in apoptotic signaling pathway		Predicted intracellular proteins	Cytosol (Approved)		(M256)PID TAP63 PATHWAY; (M19)PID P73PATHWAY; (M145)PID P53 DOWNSTREAM PATHWAY		0.0	0.0	0.0	1.0	1.0	0.0	0.0	0.0	0.0	0.0	0.0	1.0	0.0	0.0	0.0	0.0	0.0	1.0	1.0	1.0
BCAM	4059	symbol	H. sapiens	4059	H. sapiens	BCAM	basal cell adhesion molecule (Lutheran blood group)	GO:0007160 cell-matrix adhesion;GO:0031589 cell-substrate adhesion;GO:0007155 cell adhesion		Predicted intracellular proteins; Blood group antigen proteins; CD markers	Nucleoli fibrillar center (Approved)			(M5898)HALLMARK DNA REPAIR; (M5945)HALLMARK HEME METABOLISM	0.0	0.0	0.0	0.0	0.0	0.0	0.0	0.0	0.0	0.0	0.0	0.0	0.0	0.0	0.0	0.0	0.0	0.0	0.0	0.0
BCAS4	55653	symbol	H. sapiens	55653	H. sapiens	BCAS4	breast carcinoma amplified sequence 4			Predicted intracellular proteins; Disease related genes	Cytosol;Intermediate filaments (Approved)				0.0	0.0	0.0	0.0	0.0	0.0	0.0	0.0	0.0	0.0	0.0	0.0	0.0	0.0	0.0	0.0	0.0	0.0	0.0	0.0
BCAT2	587	symbol	H. sapiens	587	H. sapiens	BCAT2	branched chain amino acid transaminase 2	GO:0009098 leucine biosynthetic process;GO:0009099 valine biosynthetic process;GO:0006550 isoleucine catabolic process		ENZYME proteins:Transferases; Predicted intracellular proteins; Enzymes	Mitochondria (Supported)	Pyridoxal phosphate; Glutamic acid; Leucine; Isoleucine; Pyridoxamine-5'-Phosphate; N-[O-Phosphono-Pyridoxyl]-Isoleucine; alpha-Ketoisovalerate			1.0	0.0	0.0	0.0	0.0	0.0	0.0	0.0	0.0	0.0	0.0	0.0	0.0	0.0	0.0	0.0	0.0	0.0	0.0	0.0
BCL3	602	symbol	H. sapiens	602	H. sapiens	BCL3	BCL3 transcription coactivator	GO:0002268 follicular dendritic cell differentiation;GO:0002266 follicular dendritic cell activation;GO:0002315 marginal zone B cell differentiation		Cancer-related genes:Candidate cancer biomarkers; Predicted intracellular proteins; Transcription factors:Immunoglobulin fold; Disease related genes	Nucleoplasm (Supported); Additional: Midbody;Vesicles		(M26)PID NFKAPPAB ATYPICAL PATHWAY	(M5890)HALLMARK TNFA SIGNALING VIA NFKB; (M5901)HALLMARK G2M CHECKPOINT; (M5950)HALLMARK ALLOGRAFT REJECTION	1.0	0.0	0.0	1.0	0.0	0.0	0.0	0.0	0.0	0.0	0.0	1.0	0.0	0.0	0.0	0.0	0.0	0.0	1.0	0.0
BCR	613	symbol	H. sapiens	613	H. sapiens	BCR	BCR activator of RhoGEF and GTPase	GO:0048008 platelet-derived growth factor receptor signaling pathway;GO:0035023 regulation of Rho protein signal transduction;GO:0048041 focal adhesion assembly		ENZYME proteins:Transferases; Predicted intracellular proteins; FDA approved drug targets:Small molecule drugs; Enzymes; Disease related genes; Cancer-related genes	Cytosol;Plasma membrane (Approved); Additional: Nucleoplasm	Imatinib; Dasatinib; Bosutinib; Ponatinib	(M17200)SA B CELL RECEPTOR COMPLEXES; (M1315)SIG PIP3 SIGNALING IN B LYMPHOCYTES; (M241)PID RAC1 REG PATHWAY	(M5893)HALLMARK MITOTIC SPINDLE	0.0	1.0	0.0	0.0	0.0	0.0	0.0	0.0	0.0	0.0	0.0	0.0	0.0	0.0	0.0	0.0	0.0	1.0	0.0	0.0
BDNF	627	symbol	H. sapiens	627	H. sapiens	BDNF	brain derived neurotrophic factor	GO:0031550 positive regulation of brain-derived neurotrophic factor receptor signaling pathway;GO:0031548 regulation of brain-derived neurotrophic factor receptor signaling pathway;GO:0031547 brain-derived neurotrophic factor receptor signaling pathway		Cancer-related genes:Candidate cancer biomarkers; RAS pathway related proteins; Predicted intracellular proteins; Predicted secreted proteins; Disease related genes	Mitochondria;Nuclear speckles (Supported)	CX717; Copper; Chondroitin sulfate; Esketamine	(M142)PID AJDISS 2PATHWAY; (M100)PID SHP2 PATHWAY; (M187)PID TRKR PATHWAY	(M5942)HALLMARK UV RESPONSE DN; (M5930)HALLMARK EPITHELIAL MESENCHYMAL TRANSITION	0.0	1.0	0.0	0.0	1.0	0.0	1.0	0.0	0.0	0.0	1.0	1.0	0.0	0.0	0.0	0.0	0.0	0.0	0.0	0.0
BEND3	57673	symbol	H. sapiens	57673	H. sapiens	BEND3	BEN domain containing 3	GO:0098532 histone H3-K27 trimethylation;GO:0034773 histone H4-K20 trimethylation;GO:0000183 rDNA heterochromatin assembly		Predicted intracellular proteins	Nucleoplasm (Approved)				0.0	1.0	1.0	0.0	1.0	0.0	0.0	0.0	0.0	0.0	0.0	0.0	0.0	0.0	0.0	0.0	0.0	0.0	0.0	0.0
BIN1	274	symbol	H. sapiens	274	H. sapiens	BIN1	bridging integrator 1	GO:0106135 negative regulation of cardiac muscle cell contraction;GO:1903946 negative regulation of ventricular cardiac muscle cell action potential;GO:1902960 negative regulation of aspartic-type endopeptidase activity involved in amyloid precursor protein catabolic process		Predicted intracellular proteins; Disease related genes	Cytosol (Supported)		(M67)PID ARF6 TRAFFICKING PATHWAY; (M19)PID P73PATHWAY	(M5893)HALLMARK MITOTIC SPINDLE; (M5909)HALLMARK MYOGENESIS	0.0	0.0	0.0	0.0	0.0	0.0	0.0	0.0	0.0	0.0	1.0	0.0	1.0	0.0	0.0	0.0	0.0	0.0	0.0	0.0
BLID	414899	symbol	H. sapiens	414899	H. sapiens	BLID	BH3-like motif containing, cell death inducer	GO:0043280 positive regulation of cysteine-type endopeptidase activity involved in apoptotic process;GO:2001056 positive regulation of cysteine-type endopeptidase activity;GO:0010950 positive regulation of endopeptidase activity		Predicted intracellular proteins					0.0	0.0	0.0	0.0	0.0	0.0	0.0	0.0	0.0	0.0	0.0	0.0	0.0	0.0	0.0	0.0	0.0	0.0	0.0	1.0
BLOC1S4	55330	symbol	H. sapiens	55330	H. sapiens	BLOC1S4	biogenesis of lysosomal organelles complex 1 subunit 4	GO:0048490 anterograde synaptic vesicle transport;GO:0099514 synaptic vesicle cytoskeletal transport;GO:0099517 synaptic vesicle transport along microtubule		Predicted intracellular proteins	Vesicles (Approved); Additional: Cytosol				0.0	0.0	0.0	0.0	0.0	0.0	0.0	0.0	0.0	0.0	0.0	0.0	0.0	0.0	0.0	0.0	0.0	0.0	0.0	0.0
BLVRB	645	symbol	H. sapiens	645	H. sapiens	BLVRB	biliverdin reductase B	GO:0042167 heme catabolic process;GO:0046149 pigment catabolic process;GO:0006787 porphyrin-containing compound catabolic process		Predicted intracellular proteins; Enzymes; ENZYME proteins:Oxidoreductases; FDA approved drug targets:Small molecule drugs	Cytosol (Supported); Additional: Nucleoplasm;Plasma membrane;Vesicles	Riboflavin; NADH; Biliverdine IX Alpha; Flavin mononucleotide; Nicotinamide adenine dinucleotide phosphate; Lumichrome; Mesobiliverdin IV alpha		(M5906)HALLMARK ESTROGEN RESPONSE EARLY; (M5907)HALLMARK ESTROGEN RESPONSE LATE; (M5934)HALLMARK XENOBIOTIC METABOLISM	1.0	0.0	0.0	0.0	0.0	0.0	0.0	0.0	0.0	0.0	0.0	0.0	0.0	0.0	0.0	0.0	0.0	1.0	0.0	0.0
BMI1	648	symbol	H. sapiens	648	H. sapiens	BMI1	BMI1 proto-oncogene, polycomb ring finger	GO:0009955 adaxial/abaxial pattern specification;GO:2000011 regulation of adaxial/abaxial pattern formation;GO:0033092 positive regulation of immature T cell proliferation in thymus		Cancer-related genes:Candidate cancer biomarkers; Predicted intracellular proteins	Nuclear bodies;Nucleoplasm (Approved); Additional: Cytosol;Nucleoli		(M66)PID MYC ACTIV PATHWAY		1.0	1.0	1.0	0.0	0.0	0.0	0.0	1.0	0.0	0.0	0.0	1.0	0.0	0.0	0.0	0.0	0.0	1.0	0.0	0.0
BMP4	652	symbol	H. sapiens	652	H. sapiens	BMP4	bone morphogenetic protein 4	GO:0003277 apoptotic process involved in endocardial cushion morphogenesis;GO:0048390 intermediate mesoderm morphogenesis;GO:0048391 intermediate mesoderm formation		Cancer-related genes:Candidate cancer biomarkers; Predicted intracellular proteins; Predicted secreted proteins; Disease related genes		Calcium	(M181)PID BMP PATHWAY; (M5883)NABA SECRETED FACTORS; (M5885)NABA MATRISOME ASSOCIATED		0.0	0.0	0.0	1.0	0.0	1.0	1.0	0.0	0.0	0.0	1.0	1.0	0.0	0.0	0.0	1.0	1.0	0.0	0.0	0.0
BMP8B	656	symbol	H. sapiens	656	H. sapiens	BMP8B	bone morphogenetic protein 8b	GO:0010862 positive regulation of pathway-restricted SMAD protein phosphorylation;GO:0060393 regulation of pathway-restricted SMAD protein phosphorylation;GO:0060389 pathway-restricted SMAD protein phosphorylation		Predicted secreted proteins			(M5883)NABA SECRETED FACTORS; (M5885)NABA MATRISOME ASSOCIATED; (M5889)NABA MATRISOME		0.0	0.0	0.0	0.0	0.0	0.0	0.0	0.0	0.0	0.0	0.0	0.0	0.0	0.0	0.0	0.0	0.0	0.0	0.0	0.0
BOK	666	symbol	H. sapiens	666	H. sapiens	BOK	BCL2 family apoptosis regulator BOK	GO:1904700 granulosa cell apoptotic process;GO:1904708 regulation of granulosa cell apoptotic process;GO:1903899 positive regulation of PERK-mediated unfolded protein response							0.0	0.0	0.0	1.0	0.0	0.0	0.0	0.0	0.0	0.0	0.0	1.0	0.0	0.0	0.0	0.0	1.0	0.0	1.0	1.0
BOK-AS1	100379249	symbol	H. sapiens	100379249	H. sapiens	BOK-AS1	BOK antisense RNA 1								0.0	0.0	0.0	0.0	0.0	0.0	0.0	0.0	0.0	0.0	0.0	0.0	0.0	0.0	0.0	0.0	0.0	0.0	0.0	0.0
BOP1	23246	symbol	H. sapiens	23246	H. sapiens	BOP1	BOP1 ribosomal biogenesis factor	GO:0000448 cleavage in ITS2 between 5.8S rRNA and LSU-rRNA of tricistronic rRNA transcript (SSU-rRNA, 5.8S rRNA, LSU-rRNA);GO:0000463 maturation of LSU-rRNA from tricistronic rRNA transcript (SSU-rRNA, 5.8S rRNA, LSU-rRNA);GO:0000478 endonucleolytic cleavage involved in rRNA processing		Predicted intracellular proteins	Nucleoli;Nucleoli rim (Enhanced); Additional: Mitotic chromosome;Nucleoplasm				1.0	0.0	0.0	0.0	0.0	0.0	0.0	0.0	0.0	1.0	0.0	0.0	0.0	0.0	0.0	0.0	0.0	0.0	0.0	0.0
BRF1	2972	symbol	H. sapiens	2972	H. sapiens	BRF1	BRF1 RNA polymerase III transcription initiation factor subunit	GO:0006384 transcription initiation from RNA polymerase III promoter;GO:0009304 tRNA transcription;GO:0045945 positive regulation of transcription by RNA polymerase III		Predicted intracellular proteins; Disease related genes	Nucleoplasm (Approved); Additional: Nuclear bodies				0.0	1.0	0.0	0.0	0.0	0.0	0.0	0.0	0.0	0.0	0.0	0.0	0.0	0.0	0.0	0.0	0.0	0.0	0.0	0.0
BRSK1	84446	symbol	H. sapiens	84446	H. sapiens	BRSK1	BR serine/threonine kinase 1	GO:0090176 microtubule cytoskeleton organization involved in establishment of planar polarity;GO:2000807 regulation of synaptic vesicle clustering;GO:0097091 synaptic vesicle clustering	CAMK Ser/Thr protein kinase family	ENZYME proteins:Transferases; Kinases:CAMK Ser/Thr protein kinases; Enzymes; Predicted intracellular proteins	Nucleoplasm (Supported); Additional: Cell Junctions		(M87)PID LKB1 PATHWAY		0.0	0.0	0.0	0.0	0.0	0.0	0.0	0.0	0.0	0.0	0.0	0.0	0.0	0.0	0.0	0.0	0.0	0.0	0.0	0.0
BSCL2	26580	symbol	H. sapiens	26580	H. sapiens	BSCL2	BSCL2 lipid droplet biogenesis associated, seipin	GO:0140042 lipid droplet formation;GO:0050995 negative regulation of lipid catabolic process;GO:0034389 lipid droplet organization		Predicted intracellular proteins; Disease related genes					0.0	0.0	0.0	0.0	0.0	0.0	0.0	0.0	0.0	0.0	0.0	0.0	0.0	0.0	0.0	0.0	0.0	0.0	0.0	0.0
BSG	682	symbol	H. sapiens	682	H. sapiens	BSG	basigin (Ok blood group)	GO:0046689 response to mercury ion;GO:0070593 dendrite self-avoidance;GO:0046697 decidualization		Predicted intracellular proteins; Blood group antigen proteins; CD markers; Transporters:Accessory Factors Involved in Transport	Vesicles (Approved)		(M198)PID SYNDECAN 1 PATHWAY	(M5941)HALLMARK UV RESPONSE UP; (M5945)HALLMARK HEME METABOLISM	0.0	0.0	0.0	0.0	1.0	0.0	0.0	0.0	0.0	0.0	0.0	0.0	1.0	0.0	0.0	0.0	0.0	0.0	0.0	0.0
C10orf95	79946	symbol	H. sapiens	79946	H. sapiens	C10orf95	chromosome 10 open reading frame 95			Predicted secreted proteins					0.0	0.0	0.0	0.0	0.0	0.0	0.0	0.0	0.0	0.0	0.0	0.0	0.0	0.0	0.0	0.0	0.0	0.0	0.0	0.0
C11orf31	280636	gene_synonym	H. sapiens	280636	H. sapiens	SELENOH	selenoprotein H			Predicted intracellular proteins	Nucleoli;Nucleoplasm (Approved)				0.0	0.0	0.0	0.0	0.0	0.0	0.0	0.0	0.0	0.0	0.0	0.0	0.0	0.0	0.0	0.0	0.0	0.0	0.0	0.0
C11orf95	65998	gene_synonym	H. sapiens	65998	H. sapiens	ZFTA	zinc finger translocation associated	GO:0045892 negative regulation of transcription, DNA-templated;GO:1903507 negative regulation of nucleic acid-templated transcription;GO:1902679 negative regulation of RNA biosynthetic process		Predicted intracellular proteins; Disease related genes	Intermediate filaments (Approved)				0.0	0.0	0.0	0.0	0.0	0.0	0.0	0.0	0.0	0.0	0.0	0.0	0.0	0.0	0.0	0.0	0.0	0.0	0.0	0.0
C11orf96	387763	symbol	H. sapiens	387763	H. sapiens	C11orf96	chromosome 11 open reading frame 96			Predicted intracellular proteins	Cytosol;Focal adhesion sites;Nucleoplasm (Approved)				0.0	0.0	0.0	0.0	0.0	0.0	0.0	0.0	0.0	0.0	0.0	0.0	0.0	0.0	0.0	0.0	0.0	0.0	0.0	0.0
C11orf98	102288414	symbol	H. sapiens	102288414	H. sapiens	C11orf98	chromosome 11 open reading frame 98			Predicted intracellular proteins					0.0	0.0	0.0	0.0	0.0	0.0	0.0	0.0	0.0	0.0	0.0	0.0	0.0	0.0	0.0	0.0	0.0	0.0	0.0	0.0
C12orf42	374470	symbol	H. sapiens	374470	H. sapiens	C12orf42	chromosome 12 open reading frame 42			Predicted intracellular proteins					0.0	0.0	0.0	0.0	0.0	0.0	0.0	0.0	0.0	0.0	0.0	0.0	0.0	0.0	0.0	0.0	0.0	0.0	0.0	0.0
C15orf61	145853	symbol	H. sapiens	145853	H. sapiens	C15orf61	chromosome 15 open reading frame 61			Predicted intracellular proteins; Predicted secreted proteins	Nucleoli;Vesicles (Approved); Additional: Cytosol				0.0	0.0	0.0	0.0	0.0	0.0	0.0	0.0	0.0	0.0	0.0	0.0	0.0	0.0	0.0	0.0	0.0	0.0	0.0	0.0
C16orf13	84326	gene_synonym	H. sapiens	84326	H. sapiens	METTL26	methyltransferase like 26			Predicted intracellular proteins	Golgi apparatus (Approved)				0.0	0.0	0.0	0.0	0.0	0.0	0.0	0.0	0.0	0.0	0.0	0.0	0.0	0.0	0.0	0.0	0.0	0.0	0.0	0.0
C16orf58	64755	gene_synonym	H. sapiens	64755	H. sapiens	RUSF1	RUS family member 1			Predicted intracellular proteins	Golgi apparatus;Nucleoli;Vesicles (Approved); Additional: Cytosol;Nucleoplasm				0.0	0.0	0.0	0.0	0.0	0.0	0.0	0.0	0.0	0.0	0.0	0.0	0.0	0.0	0.0	0.0	0.0	0.0	0.0	0.0
C16orf93	90835	gene_synonym	H. sapiens	90835	H. sapiens	CCDC189	coiled-coil domain containing 189			Predicted intracellular proteins	Cytosol (Approved)				0.0	0.0	0.0	0.0	0.0	0.0	0.0	0.0	0.0	0.0	0.0	0.0	0.0	0.0	0.0	0.0	0.0	0.0	0.0	0.0
C17orf107	100130311	symbol	H. sapiens	100130311	H. sapiens	C17orf107	chromosome 17 open reading frame 107			Predicted intracellular proteins	Nucleoplasm (Approved)				0.0	0.0	0.0	0.0	0.0	0.0	0.0	0.0	0.0	0.0	0.0	0.0	0.0	0.0	0.0	0.0	0.0	0.0	0.0	0.0
C17orf49	124944	symbol	H. sapiens	124944	H. sapiens	C17orf49	chromosome 17 open reading frame 49	GO:0006325 chromatin organization;GO:0051276 chromosome organization;GO:0006996 organelle organization		Predicted intracellular proteins	Nucleoplasm (Uncertain); Additional: Cytosol				0.0	0.0	0.0	0.0	0.0	0.0	0.0	0.0	0.0	0.0	0.0	0.0	0.0	0.0	0.0	0.0	0.0	0.0	0.0	0.0
C17orf59	54785	gene_synonym	H. sapiens	54785	H. sapiens	BORCS6	BLOC-1 related complex subunit 6	GO:0032418 lysosome localization;GO:0051640 organelle localization;GO:0051641 cellular localization		Predicted intracellular proteins	Golgi apparatus;Vesicles (Approved)				0.0	0.0	0.0	0.0	0.0	0.0	0.0	0.0	0.0	0.0	0.0	0.0	0.0	0.0	0.0	0.0	0.0	0.0	0.0	0.0
C17orf62	79415	gene_synonym	H. sapiens	79415	H. sapiens	CYBC1	cytochrome b-245 chaperone 1	GO:0045728 respiratory burst after phagocytosis;GO:0002679 respiratory burst involved in defense response;GO:0045730 respiratory burst		Predicted intracellular proteins	Plasma membrane (Approved); Additional: Cell Junctions				0.0	0.0	0.0	0.0	0.0	0.0	0.0	0.0	0.0	0.0	0.0	0.0	0.0	0.0	0.0	0.0	0.0	0.0	0.0	0.0
C17orf82	388407	gene_synonym	H. sapiens	388407	H. sapiens	LINC02875	long intergenic non-protein coding RNA 2875								0.0	0.0	0.0	0.0	0.0	0.0	0.0	0.0	0.0	0.0	0.0	0.0	0.0	0.0	0.0	0.0	0.0	0.0	0.0	0.0
C17orf89	284184	gene_synonym	H. sapiens	284184	H. sapiens	NDUFAF8	NADH:ubiquinone oxidoreductase complex assembly factor 8	GO:0010257 NADH dehydrogenase complex assembly;GO:0032981 mitochondrial respiratory chain complex I assembly;GO:0033108 mitochondrial respiratory chain complex assembly		Predicted intracellular proteins	Mitochondria (Approved)				0.0	0.0	0.0	1.0	1.0	0.0	0.0	0.0	0.0	0.0	0.0	0.0	0.0	0.0	0.0	0.0	0.0	0.0	0.0	0.0
C18orf32	497661	symbol	H. sapiens	497661	H. sapiens	C18orf32	chromosome 18 open reading frame 32	GO:0043123 positive regulation of I-kappaB kinase/NF-kappaB signaling;GO:0043122 regulation of I-kappaB kinase/NF-kappaB signaling;GO:0007249 I-kappaB kinase/NF-kappaB signaling			Vesicles (Approved); Additional: Nucleoplasm				0.0	0.0	0.0	0.0	0.0	0.0	0.0	0.0	0.0	0.0	0.0	0.0	0.0	0.0	0.0	0.0	0.0	0.0	0.0	0.0
C19orf12	83636	symbol	H. sapiens	83636	H. sapiens	C19orf12	chromosome 19 open reading frame 12	GO:0051560 mitochondrial calcium ion homeostasis;GO:0006874 cellular calcium ion homeostasis;GO:0006979 response to oxidative stress		Predicted intracellular proteins; Disease related genes	Cytosol (Supported)				0.0	0.0	0.0	0.0	0.0	0.0	0.0	0.0	0.0	0.0	0.0	0.0	0.0	0.0	0.0	0.0	0.0	0.0	0.0	0.0
C19orf26	255057	gene_synonym	H. sapiens	255057	H. sapiens	CBARP	CACN subunit beta associated regulatory protein	GO:0045955 negative regulation of calcium ion-dependent exocytosis;GO:1901386 negative regulation of voltage-gated calcium channel activity;GO:1903306 negative regulation of regulated secretory pathway		Predicted intracellular proteins	Nucleoplasm (Approved)				0.0	0.0	0.0	0.0	0.0	0.0	0.0	0.0	0.0	0.0	0.0	0.0	0.0	0.0	0.0	0.0	0.0	0.0	0.0	0.0
C19orf35	374872	gene_synonym	H. sapiens	374872	H. sapiens	PEAK3	PEAK family member 3	GO:0008360 regulation of cell shape;GO:0022604 regulation of cell morphogenesis;GO:0032956 regulation of actin cytoskeleton organization	Other	Predicted intracellular proteins	Cytosol (Uncertain)				0.0	0.0	0.0	0.0	0.0	0.0	0.0	0.0	0.0	0.0	0.0	0.0	0.0	0.0	0.0	0.0	0.0	0.0	0.0	0.0
C19orf43	79002	gene_synonym	H. sapiens	79002	H. sapiens	TRIR	telomerase RNA component interacting RNase	GO:0016075 rRNA catabolic process;GO:0090503 RNA phosphodiester bond hydrolysis, exonucleolytic;GO:0034661 ncRNA catabolic process		Predicted intracellular proteins	Nucleoplasm (Approved)				0.0	0.0	0.0	0.0	0.0	0.0	0.0	0.0	0.0	1.0	0.0	0.0	0.0	0.0	0.0	0.0	0.0	0.0	0.0	0.0
C19orf52	90580	gene_synonym	H. sapiens	90580	H. sapiens	TIMM29	translocase of inner mitochondrial membrane 29	GO:0045039 protein insertion into mitochondrial inner membrane;GO:0051204 protein insertion into mitochondrial membrane;GO:0090151 establishment of protein localization to mitochondrial membrane		Predicted intracellular proteins	Mitochondria (Supported); Additional: Nucleoplasm				0.0	0.0	0.0	1.0	0.0	0.0	0.0	0.0	0.0	0.0	0.0	0.0	0.0	0.0	0.0	0.0	0.0	0.0	0.0	0.0
C19orf60	55049	gene_synonym	H. sapiens	55049	H. sapiens	REX1BD	required for excision 1-B domain containing			Predicted intracellular proteins	Vesicles (Approved)				0.0	0.0	0.0	0.0	0.0	0.0	0.0	0.0	0.0	0.0	0.0	0.0	0.0	0.0	0.0	0.0	0.0	0.0	0.0	0.0
C1orf110	339512	gene_synonym	H. sapiens	339512	H. sapiens	CCDC190	coiled-coil domain containing 190			Predicted intracellular proteins	Vesicles (Approved)				0.0	0.0	0.0	0.0	0.0	0.0	0.0	0.0	0.0	0.0	0.0	0.0	0.0	0.0	0.0	0.0	0.0	0.0	0.0	0.0
C1orf122	127687	symbol	H. sapiens	127687	H. sapiens	C1orf122	chromosome 1 open reading frame 122			Predicted intracellular proteins					0.0	0.0	0.0	0.0	0.0	0.0	0.0	0.0	0.0	0.0	0.0	0.0	0.0	0.0	0.0	0.0	0.0	0.0	0.0	0.0
C1orf53	388722	symbol	H. sapiens	388722	H. sapiens	C1orf53	chromosome 1 open reading frame 53			Predicted intracellular proteins	Vesicles (Approved); Additional: Aggresome				0.0	0.0	0.0	0.0	0.0	0.0	0.0	0.0	0.0	0.0	0.0	0.0	0.0	0.0	0.0	0.0	0.0	0.0	0.0	0.0
C1QBP	708	symbol	H. sapiens	708	H. sapiens	C1QBP	complement C1q binding protein	GO:0039534 negative regulation of MDA-5 signaling pathway;GO:0042256 mature ribosome assembly;GO:1901165 positive regulation of trophoblast cell migration		Cancer-related genes:Candidate cancer biomarkers; Transporters; Predicted intracellular proteins; Disease related genes; Potential drug targets	Plasma membrane (Approved); Additional: Mitochondria	Hyaluronic acid; Copper		(M5926)HALLMARK MYC TARGETS V1	1.0	1.0	0.0	0.0	0.0	0.0	0.0	0.0	0.0	1.0	0.0	1.0	0.0	0.0	0.0	0.0	0.0	1.0	1.0	0.0
C20orf24	55969	gene_synonym	H. sapiens	55969	H. sapiens	RAB5IF	RAB5 interacting factor	GO:0097250 mitochondrial respirasome assembly;GO:0007005 mitochondrion organization;GO:0034622 cellular protein-containing complex assembly			Cytosol (Approved)				0.0	0.0	0.0	1.0	0.0	0.0	0.0	0.0	0.0	0.0	0.0	0.0	0.0	0.0	0.0	0.0	0.0	0.0	0.0	0.0
C21orf2	755	gene_synonym	H. sapiens	755	H. sapiens	CFAP410	cilia and flagella associated protein 410	GO:0042769 DNA damage response, detection of DNA damage;GO:0007224 smoothened signaling pathway;GO:0008360 regulation of cell shape		Predicted intracellular proteins; Disease related genes	Mitochondria (Supported); Additional: Cytosol;Vesicles				0.0	0.0	0.0	0.0	0.0	0.0	0.0	0.0	0.0	0.0	0.0	0.0	0.0	0.0	0.0	0.0	0.0	0.0	0.0	0.0
C21orf33	8209	gene_synonym	H. sapiens	8209	H. sapiens	GATD3	glutamine amidotransferase class 1 domain containing 3			Predicted intracellular proteins	Mitochondria (Approved); Additional: Centrosome				0.0	0.0	0.0	0.0	0.0	0.0	0.0	0.0	0.0	0.0	0.0	0.0	0.0	0.0	0.0	0.0	0.0	0.0	1.0	0.0
C21orf59	56683	gene_synonym	H. sapiens	56683	H. sapiens	CFAP298	cilia and flagella associated protein 298	GO:0003352 regulation of cilium movement;GO:0060632 regulation of microtubule-based movement;GO:0003341 cilium movement		Predicted intracellular proteins; Disease related genes					0.0	0.0	0.0	0.0	0.0	0.0	0.0	0.0	0.0	0.0	0.0	0.0	0.0	0.0	0.0	0.0	0.0	0.0	0.0	0.0
C2CD4D	100191040	symbol	H. sapiens	100191040	H. sapiens	C2CD4D	C2 calcium dependent domain containing 4D			Predicted intracellular proteins					0.0	0.0	0.0	0.0	0.0	0.0	0.0	0.0	0.0	0.0	0.0	0.0	0.0	0.0	0.0	0.0	0.0	0.0	0.0	0.0
C5orf38	153571	symbol	H. sapiens	153571	H. sapiens	C5orf38	chromosome 5 open reading frame 38			Predicted intracellular proteins; Predicted secreted proteins	Golgi apparatus;Vesicles (Approved)				0.0	0.0	0.0	0.0	0.0	0.0	0.0	0.0	0.0	0.0	0.0	0.0	0.0	0.0	0.0	0.0	0.0	0.0	0.0	0.0
C6orf223	221416	symbol	H. sapiens	221416	H. sapiens	C6orf223	chromosome 6 open reading frame 223			Predicted intracellular proteins	Nucleoli fibrillar center (Approved)				0.0	0.0	0.0	0.0	0.0	0.0	0.0	0.0	0.0	0.0	0.0	0.0	0.0	0.0	0.0	0.0	0.0	0.0	0.0	0.0
C6orf47	57827	symbol	H. sapiens	57827	H. sapiens	C6orf47	chromosome 6 open reading frame 47				Cytosol (Approved)				0.0	0.0	0.0	0.0	0.0	0.0	0.0	0.0	0.0	0.0	0.0	0.0	0.0	0.0	0.0	0.0	0.0	0.0	0.0	0.0
C7orf50	84310	symbol	H. sapiens	84310	H. sapiens	C7orf50	chromosome 7 open reading frame 50			Predicted intracellular proteins	Nucleoli;Nucleoplasm (Approved)				0.0	0.0	0.0	0.0	0.0	0.0	0.0	0.0	0.0	0.0	0.0	0.0	0.0	0.0	0.0	0.0	0.0	0.0	0.0	0.0
C8orf76	84933	symbol	H. sapiens	84933	H. sapiens	C8orf76	chromosome 8 open reading frame 76			Predicted intracellular proteins	Nucleoplasm (Uncertain); Additional: Cytosol				0.0	0.0	0.0	0.0	0.0	0.0	0.0	0.0	0.0	0.0	0.0	0.0	0.0	0.0	0.0	0.0	0.0	0.0	0.0	0.0
C8orf82	414919	symbol	H. sapiens	414919	H. sapiens	C8orf82	chromosome 8 open reading frame 82			Predicted intracellular proteins	Nucleoplasm (Approved)				0.0	0.0	0.0	0.0	0.0	0.0	0.0	0.0	0.0	0.0	0.0	0.0	0.0	0.0	0.0	0.0	0.0	0.0	0.0	0.0
C9orf131	138724	symbol	H. sapiens	138724	H. sapiens	C9orf131	chromosome 9 open reading frame 131			Predicted intracellular proteins	Mitochondria (Approved)				0.0	0.0	0.0	0.0	0.0	0.0	0.0	0.0	0.0	0.0	0.0	0.0	0.0	0.0	0.0	0.0	0.0	0.0	0.0	0.0
C9orf16	79095	gene_synonym	H. sapiens	79095	H. sapiens	BBLN	bublin coiled coil protein	GO:0008150 biological_process		Predicted intracellular proteins	Microtubules (Approved)				0.0	0.0	0.0	0.0	0.0	0.0	0.0	0.0	0.0	0.0	0.0	0.0	0.0	0.0	0.0	0.0	0.0	0.0	0.0	0.0
C9orf172	389813	gene_synonym	H. sapiens	389813	H. sapiens	AJM1	apical junction component 1 homolog	GO:0045216 cell-cell junction organization;GO:0034330 cell junction organization;GO:0016043 cellular component organization		Predicted intracellular proteins	Cytosol;Focal adhesion sites (Approved)				0.0	0.0	0.0	0.0	0.0	0.0	0.0	0.0	0.0	0.0	0.0	0.0	0.0	0.0	0.0	0.0	0.0	0.0	0.0	0.0
C9orf69	90120	gene_synonym	H. sapiens	90120	H. sapiens	TMEM250	transmembrane protein 250	GO:0048524 positive regulation of viral process;GO:0061640 cytoskeleton-dependent cytokinesis;GO:0050792 regulation of viral process		Predicted intracellular proteins	Nucleoplasm (Supported)				0.0	0.0	0.0	0.0	0.0	0.0	0.0	0.0	0.0	0.0	0.0	0.0	0.0	0.0	0.0	0.0	0.0	0.0	0.0	0.0
CACFD1	11094	symbol	H. sapiens	11094	H. sapiens	CACFD1	calcium channel flower domain containing 1	GO:0016192 vesicle-mediated transport;GO:0006810 transport;GO:0051234 establishment of localization		Transporters:Transporter channels and pores	Nucleoplasm (Approved)				0.0	0.0	0.0	0.0	0.0	0.0	0.0	0.0	0.0	0.0	0.0	0.0	0.0	0.0	0.0	0.0	0.0	0.0	0.0	0.0
CACNA1H	8912	symbol	H. sapiens	8912	H. sapiens	CACNA1H	calcium voltage-gated channel subunit alpha1 H	GO:0032342 aldosterone biosynthetic process;GO:0034651 cortisol biosynthetic process;GO:1902645 tertiary alcohol biosynthetic process		Transporters:Transporter channels and pores; FDA approved drug targets:Small molecule drugs; Disease related genes; Voltage-gated ion channels:Voltage-Gated Calcium Channels	Nucleoplasm;Vesicles (Approved)	Isradipine; Cinnarizine; Verapamil; Zonisamide; Felodipine; Nitrendipine; Bepridil; Mibefradil; Flunarizine; Cannabidiol; Medical Cannabis; Nabiximols		(M5909)HALLMARK MYOGENESIS; (M5937)HALLMARK GLYCOLYSIS	1.0	0.0	0.0	0.0	0.0	0.0	0.0	0.0	0.0	0.0	1.0	0.0	0.0	0.0	0.0	0.0	0.0	0.0	0.0	0.0
CACNG8	59283	symbol	H. sapiens	59283	H. sapiens	CACNG8	calcium voltage-gated channel auxiliary subunit gamma 8	GO:0098943 neurotransmitter receptor transport, postsynaptic endosome to lysosome;GO:0098953 receptor diffusion trapping;GO:0098970 postsynaptic neurotransmitter receptor diffusion trapping		Transporters:Accessory Factors Involved in Transport					0.0	0.0	0.0	1.0	0.0	0.0	0.0	0.0	0.0	0.0	0.0	0.0	0.0	0.0	0.0	0.0	0.0	0.0	0.0	0.0
CACTIN	58509	symbol	H. sapiens	58509	H. sapiens	CACTIN	cactin, spliceosome C complex subunit	GO:0031665 negative regulation of lipopolysaccharide-mediated signaling pathway;GO:0032688 negative regulation of interferon-beta production;GO:0060339 negative regulation of type I interferon-mediated signaling pathway		Predicted intracellular proteins	Nuclear speckles;Nucleoplasm (Supported); Additional: Cytosol				0.0	0.0	0.0	0.0	0.0	0.0	0.0	0.0	0.0	0.0	0.0	1.0	0.0	0.0	0.0	0.0	0.0	0.0	0.0	0.0
CACTIN-AS1	404665	symbol	H. sapiens	404665	H. sapiens	CACTIN-AS1	CACTIN antisense RNA 1								0.0	0.0	0.0	0.0	0.0	0.0	0.0	0.0	0.0	0.0	0.0	0.0	0.0	0.0	0.0	0.0	0.0	0.0	0.0	0.0
CAMK1	8536	symbol	H. sapiens	8536	H. sapiens	CAMK1	calcium/calmodulin dependent protein kinase I	GO:0051835 positive regulation of synapse structural plasticity;GO:0051823 regulation of synapse structural plasticity;GO:2000615 regulation of histone H3-K9 acetylation	CAMK Ser/Thr protein kinase family	ENZYME proteins:Transferases; Kinases:CAMK Ser/Thr protein kinases; Enzymes; Predicted intracellular proteins	Cytosol (Approved)	Fostamatinib			0.0	0.0	0.0	0.0	0.0	0.0	0.0	0.0	0.0	0.0	1.0	0.0	0.0	0.0	0.0	0.0	0.0	0.0	0.0	0.0
CARD10	29775	symbol	H. sapiens	29775	H. sapiens	CARD10	caspase recruitment domain family member 10	GO:0007250 activation of NF-kappaB-inducing kinase activity;GO:0090051 negative regulation of cell migration involved in sprouting angiogenesis;GO:0090049 regulation of cell migration involved in sprouting angiogenesis		Predicted intracellular proteins	Intermediate filaments;Vesicles (Approved); Additional: Cytosol				0.0	0.0	0.0	0.0	0.0	0.0	0.0	0.0	0.0	0.0	0.0	0.0	0.0	0.0	0.0	0.0	0.0	0.0	1.0	0.0
CASKIN2	57513	symbol	H. sapiens	57513	H. sapiens	CASKIN2	CASK interacting protein 2	GO:0008150 biological_process		Predicted intracellular proteins	Plasma membrane (Supported)				0.0	0.0	0.0	0.0	0.0	0.0	0.0	0.0	0.0	0.0	0.0	0.0	0.0	0.0	0.0	0.0	0.0	0.0	0.0	0.0
CBS	875	symbol	H. sapiens	875	H. sapiens	CBS	cystathionine beta-synthase	GO:0006535 cysteine biosynthetic process from serine;GO:0019343 cysteine biosynthetic process via cystathionine;GO:0043418 homocysteine catabolic process		ENZYME proteins:Lyases; Predicted intracellular proteins; Enzymes; Disease related genes; Potential drug targets	Vesicles (Approved); Additional: Nucleoli	Pyridoxal phosphate; Ademetionine; Serine; Cysteine		(M5892)HALLMARK CHOLESTEROL HOMEOSTASIS	1.0	0.0	0.0	0.0	0.0	0.0	0.0	0.0	0.0	0.0	0.0	0.0	0.0	0.0	0.0	0.0	0.0	0.0	0.0	0.0
CBWD5	220869	symbol	H. sapiens	220869	H. sapiens	CBWD5	COBW domain containing 5			Predicted intracellular proteins	Plasma membrane (Approved)				0.0	0.0	0.0	0.0	0.0	0.0	0.0	0.0	0.0	0.0	0.0	0.0	0.0	0.0	0.0	0.0	0.0	0.0	0.0	0.0
CBX4	8535	symbol	H. sapiens	8535	H. sapiens	CBX4	chromobox 4	GO:0016925 protein sumoylation;GO:0018205 peptidyl-lysine modification;GO:0006325 chromatin organization		Predicted intracellular proteins	Nucleoplasm (Enhanced); Additional: Nuclear bodies		(M279)PID RB 1PATHWAY; (M195)PID CMYB PATHWAY		1.0	1.0	0.0	0.0	0.0	0.0	0.0	0.0	0.0	0.0	0.0	0.0	0.0	0.0	0.0	0.0	0.0	1.0	0.0	0.0
CBX6	23466	symbol	H. sapiens	23466	H. sapiens	CBX6	chromobox 6	GO:0006325 chromatin organization;GO:0000122 negative regulation of transcription by RNA polymerase II;GO:0051276 chromosome organization		Predicted intracellular proteins	Mitochondria;Nucleoplasm (Approved)				1.0	1.0	0.0	0.0	0.0	0.0	0.0	0.0	0.0	0.0	0.0	0.0	0.0	0.0	0.0	0.0	0.0	1.0	0.0	0.0
CC2D1A	54862	symbol	H. sapiens	54862	H. sapiens	CC2D1A	coiled-coil and C2 domain containing 1A	GO:1905381 negative regulation of snRNA transcription by RNA polymerase II;GO:1905380 regulation of snRNA transcription by RNA polymerase II;GO:0042795 snRNA transcription by RNA polymerase II		Predicted intracellular proteins; Disease related genes	Cytosol;Plasma membrane (Supported); Additional: Nucleoli fibrillar center				0.0	0.0	0.0	0.0	0.0	0.0	0.0	0.0	0.0	0.0	0.0	0.0	0.0	0.0	0.0	0.0	0.0	0.0	0.0	0.0
CCDC101	112869	gene_synonym	H. sapiens	112869	H. sapiens	SGF29	SAGA complex associated factor 29	GO:0071169 establishment of protein localization to chromatin;GO:0070199 establishment of protein localization to chromosome;GO:0071168 protein localization to chromatin		Predicted intracellular proteins	Nucleoli (Approved); Additional: Nucleoplasm				0.0	1.0	0.0	1.0	0.0	0.0	0.0	0.0	0.0	0.0	0.0	0.0	0.0	0.0	0.0	0.0	0.0	0.0	0.0	0.0
CCDC102A	92922	symbol	H. sapiens	92922	H. sapiens	CCDC102A	coiled-coil domain containing 102A			Predicted intracellular proteins	Nucleoplasm (Approved); Additional: Nuclear bodies				0.0	0.0	0.0	0.0	0.0	0.0	0.0	0.0	0.0	0.0	0.0	0.0	0.0	0.0	0.0	0.0	0.0	0.0	0.0	0.0
CCDC106	29903	symbol	H. sapiens	29903	H. sapiens	CCDC106	coiled-coil domain containing 106			Predicted intracellular proteins	Nucleoplasm (Supported); Additional: Cytosol			(M5956)HALLMARK KRAS SIGNALING DN	0.0	0.0	0.0	0.0	0.0	0.0	0.0	0.0	0.0	0.0	0.0	0.0	0.0	0.0	0.0	0.0	0.0	0.0	0.0	0.0
CCDC107	203260	symbol	H. sapiens	203260	H. sapiens	CCDC107	coiled-coil domain containing 107				Cell Junctions;Plasma membrane (Approved); Additional: Nucleoplasm				0.0	0.0	0.0	0.0	0.0	0.0	0.0	0.0	0.0	0.0	0.0	0.0	0.0	0.0	0.0	0.0	0.0	0.0	0.0	0.0
CCDC12	151903	symbol	H. sapiens	151903	H. sapiens	CCDC12	coiled-coil domain containing 12			Predicted intracellular proteins	Nucleoplasm (Supported)				0.0	0.0	0.0	0.0	0.0	0.0	0.0	0.0	0.0	0.0	0.0	0.0	0.0	0.0	0.0	0.0	0.0	0.0	0.0	0.0
CCDC160	347475	symbol	H. sapiens	347475	H. sapiens	CCDC160	coiled-coil domain containing 160			Predicted intracellular proteins					0.0	0.0	0.0	0.0	0.0	0.0	0.0	0.0	0.0	0.0	0.0	0.0	0.0	0.0	0.0	0.0	0.0	0.0	0.0	0.0
CCDC28B	79140	symbol	H. sapiens	79140	H. sapiens	CCDC28B	coiled-coil domain containing 28B	GO:0060271 cilium assembly;GO:0044782 cilium organization;GO:0120031 plasma membrane bounded cell projection assembly		Predicted intracellular proteins; Disease related genes					0.0	0.0	0.0	0.0	0.0	0.0	0.0	0.0	0.0	0.0	0.0	0.0	0.0	0.0	0.0	0.0	0.0	0.0	0.0	0.0
CCDC64	92558	gene_synonym	H. sapiens	92558	H. sapiens	BICDL1	BICD family like cargo adaptor 1	GO:0055107 Golgi to secretory granule transport;GO:0047496 vesicle transport along microtubule;GO:0099518 vesicle cytoskeletal trafficking		Predicted intracellular proteins	Cytosol;Nucleoplasm (Approved); Additional: Vesicles				0.0	0.0	0.0	0.0	0.0	0.0	0.0	0.0	0.0	0.0	0.0	0.0	0.0	0.0	0.0	0.0	0.0	0.0	0.0	0.0
CCL13	6357	symbol	H. sapiens	6357	H. sapiens	CCL13	C-C motif chemokine ligand 13	GO:0048245 eosinophil chemotaxis;GO:0072677 eosinophil migration;GO:0048247 lymphocyte chemotaxis		Cancer-related genes:Candidate cancer biomarkers; Predicted intracellular proteins; Predicted secreted proteins			(M19043)ST ADRENERGIC; (M5883)NABA SECRETED FACTORS; (M5885)NABA MATRISOME ASSOCIATED	(M5950)HALLMARK ALLOGRAFT REJECTION	0.0	0.0	0.0	0.0	0.0	0.0	0.0	0.0	0.0	0.0	0.0	0.0	0.0	0.0	0.0	0.0	0.0	0.0	1.0	0.0
CCL2	6347	symbol	H. sapiens	6347	H. sapiens	CCL2	C-C motif chemokine ligand 2	GO:0035684 helper T cell extravasation;GO:2000502 negative regulation of natural killer cell chemotaxis;GO:1901624 negative regulation of lymphocyte chemotaxis		Cancer-related genes:Candidate cancer biomarkers; Candidate cardiovascular disease genes; Predicted secreted proteins; FDA approved drug targets:Small molecule drugs	Golgi apparatus (Approved); Additional: Vesicles	Mimosine; Danazol; Chondroitin sulfate	(M22)PID GMCSF PATHWAY; (M65)PID FRA PATHWAY; (M196)PID IL23 PATHWAY	(M5922)HALLMARK UNFOLDED PROTEIN RESPONSE; (M5890)HALLMARK TNFA SIGNALING VIA NFKB; (M5913)HALLMARK INTERFERON GAMMA RESPONSE	1.0	0.0	0.0	0.0	1.0	0.0	0.0	0.0	0.0	0.0	0.0	0.0	1.0	0.0	0.0	0.0	0.0	0.0	1.0	0.0
CCL7	6354	symbol	H. sapiens	6354	H. sapiens	CCL7	C-C motif chemokine ligand 7	GO:2000503 positive regulation of natural killer cell chemotaxis;GO:2000501 regulation of natural killer cell chemotaxis;GO:0035747 natural killer cell chemotaxis		Cancer-related genes:Candidate cancer biomarkers; Predicted secreted proteins			(M5883)NABA SECRETED FACTORS; (M5885)NABA MATRISOME ASSOCIATED; (M5889)NABA MATRISOME	(M5897)HALLMARK IL6 JAK STAT3 SIGNALING; (M5913)HALLMARK INTERFERON GAMMA RESPONSE; (M5932)HALLMARK INFLAMMATORY RESPONSE	0.0	0.0	0.0	0.0	0.0	0.0	0.0	0.0	0.0	0.0	0.0	0.0	0.0	0.0	0.0	0.0	0.0	0.0	1.0	0.0
CCNJL	79616	symbol	H. sapiens	79616	H. sapiens	CCNJL	cyclin J like	GO:0000079 regulation of cyclin-dependent protein serine/threonine kinase activity;GO:1904029 regulation of cyclin-dependent protein kinase activity;GO:0071900 regulation of protein serine/threonine kinase activity		Predicted intracellular proteins	Nuclear speckles (Approved)				0.0	0.0	0.0	0.0	0.0	0.0	0.0	0.0	0.0	0.0	0.0	0.0	0.0	0.0	0.0	0.0	0.0	0.0	0.0	0.0
CCNO	10309	symbol	H. sapiens	10309	H. sapiens	CCNO	cyclin O	GO:1903251 multi-ciliated epithelial cell differentiation;GO:0000079 regulation of cyclin-dependent protein serine/threonine kinase activity;GO:1904029 regulation of cyclin-dependent protein kinase activity		Predicted intracellular proteins; Disease related genes				(M5898)HALLMARK DNA REPAIR	0.0	0.0	0.0	0.0	0.0	0.0	0.0	0.0	0.0	0.0	0.0	0.0	0.0	0.0	0.0	0.0	0.0	0.0	0.0	0.0
CCR10	2826	symbol	H. sapiens	2826	H. sapiens	CCR10	C-C motif chemokine receptor 10	GO:0070098 chemokine-mediated signaling pathway;GO:1990868 response to chemokine;GO:1990869 cellular response to chemokine		Cancer-related genes:Candidate cancer biomarkers; G-protein coupled receptors:Chemokines and chemotactic factors receptors; G-protein coupled receptors:GPCRs excl olfactory receptors	Endoplasmic reticulum (Supported)				0.0	0.0	0.0	0.0	0.0	0.0	0.0	0.0	0.0	0.0	0.0	0.0	0.0	0.0	0.0	0.0	0.0	0.0	0.0	0.0
CCS	9973	symbol	H. sapiens	9973	H. sapiens	CCS	copper chaperone for superoxide dismutase	GO:0015680 protein maturation by copper ion transfer;GO:0019430 removal of superoxide radicals;GO:0071450 cellular response to oxygen radical		Predicted intracellular proteins		Zinc; Zinc acetate; Zinc chloride; Zinc sulfate, unspecified form			1.0	0.0	0.0	0.0	0.0	0.0	0.0	0.0	0.0	0.0	0.0	0.0	0.0	0.0	0.0	0.0	0.0	1.0	0.0	0.0
CD177	57126	symbol	H. sapiens	57126	H. sapiens	CD177	CD177 molecule	GO:0043315 positive regulation of neutrophil degranulation;GO:1902565 positive regulation of neutrophil activation;GO:0043313 regulation of neutrophil degranulation		Predicted intracellular proteins					0.0	0.0	0.0	0.0	0.0	0.0	0.0	0.0	0.0	0.0	0.0	0.0	0.0	0.0	0.0	0.0	0.0	0.0	0.0	0.0
CD200	4345	symbol	H. sapiens	4345	H. sapiens	CD200	CD200 molecule	GO:0150070 regulation of arginase activity;GO:0150072 positive regulation of arginase activity;GO:0150073 regulation of protein-glutamine gamma-glutamyltransferase activity		Predicted intracellular proteins; CD markers					0.0	0.0	0.0	0.0	0.0	0.0	0.0	0.0	0.0	0.0	0.0	0.0	0.0	0.0	0.0	0.0	0.0	0.0	0.0	0.0
CD302	9936	symbol	H. sapiens	9936	H. sapiens	CD302	CD302 molecule	GO:0006909 phagocytosis;GO:0016192 vesicle-mediated transport;GO:0006810 transport		CD markers				(M5905)HALLMARK ADIPOGENESIS	0.0	0.0	0.0	0.0	0.0	0.0	0.0	0.0	0.0	0.0	0.0	0.0	0.0	0.0	0.0	0.0	0.0	0.0	0.0	0.0
CD320	51293	symbol	H. sapiens	51293	H. sapiens	CD320	CD320 molecule	GO:0031296 B cell costimulation;GO:0015889 cobalamin transport;GO:0009235 cobalamin metabolic process		Disease related genes; CD markers	Cytosol (Approved)				0.0	0.0	0.0	0.0	0.0	0.0	0.0	0.0	0.0	0.0	0.0	0.0	0.0	0.0	0.0	0.0	0.0	0.0	0.0	0.0
CD34	947	symbol	H. sapiens	947	H. sapiens	CD34	CD34 molecule	GO:1900035 negative regulation of cellular response to heat;GO:0035759 mesangial cell-matrix adhesion;GO:0072209 metanephric mesangial cell differentiation		CD markers	Cell Junctions;Plasma membrane (Approved); Additional: Nucleoplasm		(M195)PID CMYB PATHWAY	(M5915)HALLMARK APICAL JUNCTION	0.0	0.0	0.0	0.0	0.0	0.0	0.0	0.0	0.0	0.0	0.0	0.0	0.0	0.0	0.0	0.0	1.0	0.0	0.0	0.0
CD3EAP	10849	gene_synonym	H. sapiens	10849	H. sapiens	POLR1G	RNA polymerase I subunit G	GO:0009303 rRNA transcription;GO:0006360 transcription by RNA polymerase I;GO:0098781 ncRNA transcription		Predicted intracellular proteins	Nucleoli fibrillar center;Nucleoplasm (Enhanced); Additional: Mitochondria				0.0	1.0	0.0	0.0	0.0	0.0	0.0	0.0	0.0	0.0	0.0	0.0	0.0	0.0	0.0	0.0	0.0	0.0	0.0	0.0
CDC26	246184	symbol	H. sapiens	246184	H. sapiens	CDC26	cell division cycle 26	GO:0031145 anaphase-promoting complex-dependent catabolic process;GO:0070979 protein K11-linked ubiquitination;GO:0030071 regulation of mitotic metaphase/anaphase transition		Predicted intracellular proteins	Nucleoplasm (Approved)				1.0	1.0	0.0	0.0	0.0	0.0	0.0	0.0	0.0	0.0	0.0	0.0	0.0	1.0	0.0	0.0	0.0	1.0	0.0	0.0
CDC34	997	symbol	H. sapiens	997	H. sapiens	CDC34	cell division cycle 34, ubiqiutin conjugating enzyme	GO:0090261 positive regulation of inclusion body assembly;GO:0043951 negative regulation of cAMP-mediated signaling;GO:0090083 regulation of inclusion body assembly		Cancer-related genes:Candidate cancer biomarkers; Predicted intracellular proteins; ENZYME proteins:Transferases; Enzymes	Nuclear speckles;Nucleoplasm (Supported); Additional: Cytosol			(M5941)HALLMARK UV RESPONSE UP	0.0	0.0	0.0	0.0	0.0	0.0	0.0	0.0	0.0	0.0	0.0	1.0	0.0	1.0	1.0	0.0	0.0	1.0	1.0	0.0
CDC37	11140	symbol	H. sapiens	11140	H. sapiens	CDC37	cell division cycle 37, HSP90 cochaperone	GO:0098779 positive regulation of mitophagy in response to mitochondrial depolarization;GO:1904925 positive regulation of autophagy of mitochondrion in response to mitochondrial depolarization;GO:1904923 regulation of autophagy of mitochondrion in response to mitochondrial depolarization		Cancer-related genes:Candidate cancer biomarkers; Predicted intracellular proteins	Cytosol (Supported)		(M71)PID ILK PATHWAY; (M87)PID LKB1 PATHWAY		0.0	1.0	0.0	1.0	0.0	0.0	0.0	0.0	0.0	0.0	0.0	0.0	0.0	0.0	0.0	0.0	0.0	1.0	0.0	0.0
CDC42EP5	148170	symbol	H. sapiens	148170	H. sapiens	CDC42EP5	CDC42 effector protein 5	GO:0031274 positive regulation of pseudopodium assembly;GO:0031272 regulation of pseudopodium assembly;GO:0031269 pseudopodium assembly		Predicted intracellular proteins					0.0	1.0	0.0	0.0	0.0	0.0	0.0	0.0	0.0	0.0	0.0	0.0	0.0	0.0	0.0	0.0	0.0	1.0	0.0	0.0
CDH5	1003	symbol	H. sapiens	1003	H. sapiens	CDH5	cadherin 5	GO:1902396 protein localization to bicellular tight junction;GO:1901552 positive regulation of endothelial cell development;GO:1903142 positive regulation of establishment of endothelial barrier		Cancer-related genes:Candidate cancer biomarkers; Predicted intracellular proteins; CD markers	Plasma membrane (Supported); Additional: Nuclear membrane;Nucleoplasm	Lenalidomide; FX06	(M268)PID S1P S1P2 PATHWAY; (M237)PID VEGFR1 2 PATHWAY		0.0	0.0	0.0	0.0	0.0	0.0	0.0	0.0	0.0	0.0	0.0	0.0	1.0	0.0	0.0	0.0	0.0	0.0	0.0	0.0
CDHR5	53841	symbol	H. sapiens	53841	H. sapiens	CDHR5	cadherin related family member 5	GO:0090675 intermicrovillar adhesion;GO:1904970 brush border assembly;GO:0032532 regulation of microvillus length		Predicted intracellular proteins					0.0	0.0	0.0	0.0	0.0	0.0	0.0	0.0	0.0	0.0	0.0	0.0	0.0	0.0	0.0	0.0	0.0	0.0	0.0	0.0
CDIPT	10423	symbol	H. sapiens	10423	H. sapiens	CDIPT	CDP-diacylglycerol--inositol 3-phosphatidyltransferase	GO:0046341 CDP-diacylglycerol metabolic process;GO:0006661 phosphatidylinositol biosynthetic process;GO:0046488 phosphatidylinositol metabolic process		ENZYME proteins:Transferases; Enzymes	Nuclear membrane;Nucleoplasm;Plasma membrane (Approved)	scyllo-inositol			0.0	0.0	0.0	0.0	0.0	0.0	0.0	0.0	0.0	0.0	0.0	0.0	0.0	0.0	0.0	0.0	0.0	0.0	0.0	0.0
CDK19	23097	symbol	H. sapiens	23097	H. sapiens	CDK19	cyclin dependent kinase 19	GO:0050729 positive regulation of inflammatory response;GO:0071222 cellular response to lipopolysaccharide;GO:0071219 cellular response to molecule of bacterial origin	CMGC Ser/Thr protein kinase family	ENZYME proteins:Transferases; Predicted intracellular proteins; Kinases:CMGC Ser/Thr protein kinases; Enzymes	Nucleoplasm;Vesicles (Approved)				0.0	0.0	0.0	0.0	0.0	0.0	0.0	0.0	0.0	0.0	0.0	0.0	0.0	0.0	0.0	0.0	0.0	0.0	0.0	0.0
CDKN2A	1029	symbol	H. sapiens	1029	H. sapiens	CDKN2A	cyclin dependent kinase inhibitor 2A	GO:0035986 senescence-associated heterochromatin focus assembly;GO:2000111 positive regulation of macrophage apoptotic process;GO:0033034 positive regulation of myeloid cell apoptotic process		Cancer-related genes:Candidate cancer biomarkers; Cancer-related genes:Mutated cancer genes; Predicted intracellular proteins; Disease related genes; Cancer-related genes:Mutational cancer driver genes	Nucleoli (Supported)		(M3686)SA REG CASCADE OF CYCLIN EXPR; (M1529)SA G1 AND S PHASES; (M180)PID HIF1A PATHWAY	(M5925)HALLMARK E2F TARGETS; (M5939)HALLMARK P53 PATHWAY; (M5950)HALLMARK ALLOGRAFT REJECTION	1.0	1.0	1.0	0.0	0.0	0.0	0.0	0.0	0.0	0.0	0.0	0.0	0.0	0.0	0.0	0.0	1.0	1.0	1.0	0.0
CDKN2AIPNL	91368	symbol	H. sapiens	91368	H. sapiens	CDKN2AIPNL	CDKN2A interacting protein N-terminal like			Predicted intracellular proteins					0.0	0.0	0.0	0.0	0.0	0.0	0.0	0.0	0.0	0.0	0.0	0.0	0.0	0.0	0.0	0.0	0.0	0.0	0.0	0.0
CEBPB	1051	symbol	H. sapiens	1051	H. sapiens	CEBPB	CCAAT enhancer binding protein beta	GO:2000120 positive regulation of sodium-dependent phosphate transport;GO:1901329 regulation of odontoblast differentiation;GO:2000118 regulation of sodium-dependent phosphate transport		Predicted intracellular proteins; Transcription factors:Basic domains	Nucleoplasm (Enhanced)	Quercetin	(M182)PID IL3 PATHWAY; (M229)PID P38 ALPHA BETA DOWNSTREAM PATHWAY; (M161)PID IFNG PATHWAY	(M5922)HALLMARK UNFOLDED PROTEIN RESPONSE; (M5890)HALLMARK TNFA SIGNALING VIA NFKB; (M5921)HALLMARK COMPLEMENT	1.0	1.0	0.0	0.0	0.0	0.0	1.0	1.0	0.0	0.0	0.0	1.0	0.0	0.0	0.0	0.0	0.0	1.0	1.0	0.0
CEBPD	1052	symbol	H. sapiens	1052	H. sapiens	CEBPD	CCAAT enhancer binding protein delta	GO:0045944 positive regulation of transcription by RNA polymerase II;GO:0045595 regulation of cell differentiation;GO:0045893 positive regulation of transcription, DNA-templated		Predicted intracellular proteins; Transcription factors:Basic domains	Nucleoplasm (Approved)		(M106)PID HNF3B PATHWAY; (M183)PID IL6 7 PATHWAY; (M236)PID DELTA NP63 PATHWAY	(M5890)HALLMARK TNFA SIGNALING VIA NFKB	0.0	1.0	0.0	0.0	0.0	0.0	0.0	0.0	0.0	0.0	0.0	0.0	0.0	0.0	0.0	0.0	0.0	0.0	0.0	0.0
CELF1	10658	symbol	H. sapiens	10658	H. sapiens	CELF1	CUGBP Elav-like family member 1	GO:0016246 RNA interference;GO:0040018 positive regulation of multicellular organism growth;GO:0006376 mRNA splice site selection		Predicted intracellular proteins	Nucleoplasm (Enhanced)				1.0	0.0	0.0	0.0	0.0	0.0	0.0	0.0	0.0	1.0	0.0	0.0	0.0	0.0	0.0	0.0	0.0	0.0	0.0	1.0
CELSR2	1952	symbol	H. sapiens	1952	H. sapiens	CELSR2	cadherin EGF LAG seven-pass G-type receptor 2	GO:0033326 cerebrospinal fluid secretion;GO:0021999 neural plate anterior/posterior regionalization;GO:0060897 neural plate regionalization		G-protein coupled receptors:GPCRs excl olfactory receptors; G-protein coupled receptors:Family 2 (B) receptors	Cytosol (Approved)			(M5906)HALLMARK ESTROGEN RESPONSE EARLY; (M5907)HALLMARK ESTROGEN RESPONSE LATE; (M5956)HALLMARK KRAS SIGNALING DN	0.0	0.0	0.0	0.0	0.0	0.0	0.0	0.0	0.0	0.0	0.0	0.0	0.0	0.0	0.0	1.0	0.0	0.0	0.0	0.0
CEND1	51286	symbol	H. sapiens	51286	H. sapiens	CEND1	cell cycle exit and neuronal differentiation 1	GO:0021686 cerebellar granular layer maturation;GO:0021933 radial glia guided migration of cerebellar granule cell;GO:0021941 negative regulation of cerebellar granule cell precursor proliferation			Mitochondria (Approved)				0.0	0.0	0.0	0.0	0.0	0.0	0.0	0.0	0.0	0.0	0.0	0.0	0.0	0.0	0.0	0.0	0.0	0.0	0.0	0.0
CENPB	1059	symbol	H. sapiens	1059	H. sapiens	CENPB	centromere protein B			Predicted intracellular proteins	Nuclear bodies (Enhanced); Additional: Nucleoplasm		(M176)PID FOXM1 PATHWAY		0.0	0.0	0.0	0.0	0.0	0.0	0.0	0.0	0.0	0.0	0.0	0.0	0.0	0.0	0.0	0.0	0.0	0.0	0.0	0.0
CENPV	201161	symbol	H. sapiens	201161	H. sapiens	CENPV	centromere protein V	GO:0031508 pericentric heterochromatin assembly;GO:0140462 pericentric heterochromatin organization;GO:0031055 chromatin remodeling at centromere		Predicted intracellular proteins	Nucleoplasm (Approved); Additional: Cytosol;Midbody				0.0	1.0	1.0	0.0	0.0	0.0	0.0	0.0	0.0	0.0	0.0	0.0	0.0	0.0	0.0	0.0	0.0	0.0	0.0	0.0
CEP295NL	100653515	symbol	H. sapiens	100653515	H. sapiens	CEP295NL	CEP295 N-terminal like	GO:0046599 regulation of centriole replication;GO:0007099 centriole replication;GO:0010824 regulation of centrosome duplication		Predicted intracellular proteins	Vesicles (Approved)				0.0	0.0	0.0	0.0	0.0	0.0	0.0	0.0	0.0	0.0	0.0	0.0	0.0	0.0	0.0	0.0	0.0	0.0	0.0	0.0
CH17-340M24.3						None	None	None	None	None	None	None	None	None	nan	nan	nan	nan	nan	nan	nan	nan	nan	nan	nan	nan	nan	nan	nan	nan	nan	nan	nan	nan
CHAC1	79094	symbol	H. sapiens	79094	H. sapiens	CHAC1	ChaC glutathione specific gamma-glutamylcyclotransferase 1	GO:0006751 glutathione catabolic process;GO:0006750 glutathione biosynthetic process;GO:0019184 nonribosomal peptide biosynthetic process		Predicted intracellular proteins; Enzymes; ENZYME proteins:Lyases	Mitochondria (Approved)			(M5922)HALLMARK UNFOLDED PROTEIN RESPONSE	1.0	0.0	0.0	0.0	0.0	0.0	0.0	0.0	0.0	0.0	0.0	1.0	1.0	0.0	0.0	0.0	0.0	0.0	0.0	0.0
CHCHD2	51142	symbol	H. sapiens	51142	H. sapiens	CHCHD2	coiled-coil-helix-coiled-coil-helix domain containing 2	GO:1905448 positive regulation of mitochondrial ATP synthesis coupled electron transport;GO:1905446 regulation of mitochondrial ATP synthesis coupled electron transport;GO:1900037 regulation of cellular response to hypoxia		Predicted intracellular proteins; Disease related genes	Mitochondria (Enhanced)				0.0	0.0	0.0	1.0	1.0	0.0	0.0	0.0	0.0	0.0	0.0	0.0	0.0	0.0	0.0	0.0	1.0	0.0	0.0	0.0
CHCHD6	84303	symbol	H. sapiens	84303	H. sapiens	CHCHD6	coiled-coil-helix-coiled-coil-helix domain containing 6	GO:0042407 cristae formation;GO:0007007 inner mitochondrial membrane organization;GO:0007006 mitochondrial membrane organization		Predicted intracellular proteins	Mitochondria (Supported)				0.0	0.0	0.0	1.0	0.0	0.0	0.0	0.0	0.0	0.0	0.0	0.0	0.0	0.0	0.0	0.0	0.0	0.0	0.0	0.0
CHFR	55743	symbol	H. sapiens	55743	H. sapiens	CHFR	checkpoint with forkhead and ring finger domains	GO:0044779 meiotic spindle checkpoint signaling;GO:1902103 negative regulation of metaphase/anaphase transition of meiotic cell cycle;GO:1905133 negative regulation of meiotic chromosome separation		Cancer-related genes:Candidate cancer biomarkers; Predicted intracellular proteins; ENZYME proteins:Transferases; Enzymes	Microtubules;Nuclear bodies (Uncertain)			(M5951)HALLMARK SPERMATOGENESIS	0.0	0.0	0.0	0.0	0.0	0.0	0.0	0.0	0.0	0.0	0.0	0.0	0.0	1.0	0.0	0.0	0.0	0.0	0.0	1.0
CHIC2	26511	symbol	H. sapiens	26511	H. sapiens	CHIC2	cysteine rich hydrophobic domain 2	GO:0008150 biological_process		Predicted intracellular proteins; Disease related genes	Plasma membrane;Vesicles (Enhanced)				0.0	0.0	0.0	0.0	0.0	0.0	0.0	0.0	0.0	0.0	0.0	0.0	0.0	0.0	0.0	0.0	0.0	0.0	0.0	0.0
CHMP3	51652	symbol	H. sapiens	51652	H. sapiens	CHMP3	charged multivesicular body protein 3	GO:0061763 multivesicular body-lysosome fusion;GO:0051036 regulation of endosome size;GO:0046761 viral budding from plasma membrane		Predicted intracellular proteins			(M214)PID ERBB1 INTERNALIZATION PATHWAY		0.0	1.0	0.0	0.0	0.0	0.0	0.0	0.0	0.0	0.0	0.0	0.0	0.0	0.0	0.0	0.0	0.0	1.0	0.0	0.0
CHPF	79586	symbol	H. sapiens	79586	H. sapiens	CHPF	chondroitin polymerizing factor	GO:0030206 chondroitin sulfate biosynthetic process;GO:0050650 chondroitin sulfate proteoglycan biosynthetic process;GO:0030204 chondroitin sulfate metabolic process		ENZYME proteins:Transferases; Predicted intracellular proteins; Enzymes	Cytosol (Supported); Additional: Centrosome;Vesicles			(M5937)HALLMARK GLYCOLYSIS	0.0	0.0	0.0	0.0	0.0	0.0	0.0	0.0	0.0	0.0	0.0	0.0	0.0	0.0	0.0	0.0	0.0	0.0	0.0	0.0
CHRNB2	1141	symbol	H. sapiens	1141	H. sapiens	CHRNB2	cholinergic receptor nicotinic beta 2 subunit	GO:0021771 lateral geniculate nucleus development;GO:0060084 synaptic transmission involved in micturition;GO:0042320 regulation of circadian sleep/wake cycle, REM sleep		Transporters:Transporter channels and pores; FDA approved drug targets:Small molecule drugs; Disease related genes		Nicotine; Methadone; Dextromethorphan; Atropine; Mecamylamine; Scopolamine; Isoflurane; Ethanol; Physostigmine; Decamethonium; Varenicline; Pozanicline; RPI-78M; Rivanicline; Epibatidine; Cytisine			0.0	0.0	0.0	0.0	0.0	0.0	0.0	0.0	0.0	0.0	0.0	0.0	0.0	0.0	0.0	1.0	0.0	0.0	0.0	0.0
CHST12	55501	symbol	H. sapiens	55501	H. sapiens	CHST12	carbohydrate sulfotransferase 12	GO:0030208 dermatan sulfate biosynthetic process;GO:0030205 dermatan sulfate metabolic process;GO:0050651 dermatan sulfate proteoglycan biosynthetic process		ENZYME proteins:Transferases; Enzymes	Golgi apparatus (Approved)			(M5937)HALLMARK GLYCOLYSIS	0.0	0.0	0.0	0.0	0.0	0.0	0.0	0.0	0.0	0.0	0.0	0.0	0.0	0.0	0.0	0.0	0.0	0.0	0.0	0.0
CHST7	56548	symbol	H. sapiens	56548	H. sapiens	CHST7	carbohydrate sulfotransferase 7	GO:0030206 chondroitin sulfate biosynthetic process;GO:0006044 N-acetylglucosamine metabolic process;GO:0050650 chondroitin sulfate proteoglycan biosynthetic process		ENZYME proteins:Transferases; Predicted intracellular proteins; Enzymes	Nucleoplasm;Vesicles (Approved)				0.0	0.0	0.0	0.0	0.0	0.0	0.0	0.0	0.0	0.0	0.0	0.0	0.0	0.0	0.0	0.0	0.0	0.0	0.0	0.0
CIRBP	1153	symbol	H. sapiens	1153	H. sapiens	CIRBP	cold inducible RNA binding protein	GO:0048026 positive regulation of mRNA splicing, via spliceosome;GO:0034063 stress granule assembly;GO:0050685 positive regulation of mRNA processing		Predicted intracellular proteins	Nucleoplasm (Supported)				1.0	0.0	0.0	0.0	0.0	0.0	0.0	0.0	0.0	0.0	0.0	0.0	0.0	0.0	0.0	0.0	0.0	0.0	0.0	0.0
CISD2	493856	symbol	H. sapiens	493856	H. sapiens	CISD2	CDGSH iron sulfur domain 2	GO:0010259 multicellular organism aging;GO:0000422 autophagy of mitochondrion;GO:0061726 mitochondrion disassembly		Disease related genes	Endoplasmic reticulum (Supported)				0.0	0.0	0.0	1.0	0.0	0.0	0.0	0.0	0.0	0.0	0.0	0.0	0.0	0.0	0.0	0.0	0.0	0.0	0.0	0.0
CITED4	163732	symbol	H. sapiens	163732	H. sapiens	CITED4	Cbp/p300 interacting transactivator with Glu/Asp rich carboxy-terminal domain 4	GO:0043627 response to estrogen;GO:0009725 response to hormone;GO:0045893 positive regulation of transcription, DNA-templated		Predicted intracellular proteins	Vesicles (Approved)				0.0	0.0	0.0	0.0	0.0	0.0	0.0	0.0	0.0	0.0	0.0	0.0	0.0	0.0	0.0	0.0	0.0	0.0	0.0	0.0
CLASRP	11129	symbol	H. sapiens	11129	H. sapiens	CLASRP	CLK4 associating serine/arginine rich protein	GO:0008380 RNA splicing;GO:0006397 mRNA processing;GO:0016071 mRNA metabolic process		Predicted intracellular proteins	Nucleoplasm (Enhanced)				0.0	0.0	0.0	0.0	0.0	0.0	0.0	0.0	0.0	0.0	0.0	0.0	0.0	0.0	0.0	0.0	0.0	0.0	0.0	0.0
CLDN1	9076	symbol	H. sapiens	9076	H. sapiens	CLDN1	claudin 1	GO:0061772 xenobiotic transport across blood-nerve barrier;GO:1903544 response to butyrate;GO:1903545 cellular response to butyrate		Transporters:Transporter channels and pores; Potential drug targets; Disease related genes			(M72)PID NECTIN PATHWAY		0.0	1.0	0.0	0.0	0.0	0.0	0.0	0.0	0.0	0.0	0.0	0.0	0.0	0.0	0.0	0.0	0.0	0.0	0.0	0.0
CLDN14	23562	symbol	H. sapiens	23562	H. sapiens	CLDN14	claudin 14	GO:0016338 calcium-independent cell-cell adhesion via plasma membrane cell-adhesion molecules;GO:0070830 bicellular tight junction assembly;GO:0120192 tight junction assembly		Disease related genes	Vesicles (Uncertain)			(M5915)HALLMARK APICAL JUNCTION	0.0	0.0	0.0	0.0	0.0	0.0	0.0	0.0	0.0	0.0	0.0	0.0	0.0	0.0	0.0	0.0	0.0	0.0	0.0	0.0
CLEC11A	6320	symbol	H. sapiens	6320	H. sapiens	CLEC11A	C-type lectin domain containing 11A	GO:0001503 ossification;GO:0008284 positive regulation of cell population proliferation;GO:0042127 regulation of cell population proliferation		Predicted secreted proteins	Centrosome (Approved)		(M5880)NABA ECM AFFILIATED; (M5885)NABA MATRISOME ASSOCIATED; (M5889)NABA MATRISOME		0.0	0.0	0.0	0.0	0.0	0.0	0.0	0.0	0.0	0.0	0.0	0.0	0.0	0.0	0.0	0.0	0.0	0.0	0.0	0.0
CLTA	1211	symbol	H. sapiens	1211	H. sapiens	CLTA	clathrin light chain A	GO:0048268 clathrin coat assembly;GO:0072583 clathrin-dependent endocytosis;GO:0006898 receptor-mediated endocytosis		Predicted intracellular proteins	Endosomes;Lysosomes;Vesicles (Enhanced)		(M243)PID ARF 3PATHWAY; (M195)PID CMYB PATHWAY	(M5910)HALLMARK PROTEIN SECRETION	1.0	1.0	0.0	0.0	1.0	0.0	0.0	0.0	0.0	0.0	0.0	0.0	0.0	0.0	0.0	0.0	0.0	1.0	0.0	0.0
CLTB	1212	symbol	H. sapiens	1212	H. sapiens	CLTB	clathrin light chain B	GO:0048268 clathrin coat assembly;GO:0072583 clathrin-dependent endocytosis;GO:0006898 receptor-mediated endocytosis		Predicted intracellular proteins	Vesicles (Supported); Additional: Cytosol;Plasma membrane		(M243)PID ARF 3PATHWAY	(M5941)HALLMARK UV RESPONSE UP	1.0	1.0	0.0	0.0	1.0	0.0	0.0	0.0	0.0	0.0	0.0	0.0	0.0	0.0	0.0	0.0	0.0	1.0	0.0	0.0
CNKSR3	154043	symbol	H. sapiens	154043	H. sapiens	CNKSR3	CNKSR family member 3	GO:0033137 negative regulation of peptidyl-serine phosphorylation;GO:0010765 positive regulation of sodium ion transport;GO:0070373 negative regulation of ERK1 and ERK2 cascade		Predicted intracellular proteins	Mitochondria (Approved); Additional: Cytosol				0.0	0.0	0.0	0.0	0.0	0.0	0.0	0.0	0.0	0.0	0.0	1.0	0.0	0.0	0.0	0.0	0.0	0.0	0.0	0.0
CNN2	1265	symbol	H. sapiens	1265	H. sapiens	CNN2	calponin 2	GO:0050765 negative regulation of phagocytosis;GO:0071260 cellular response to mechanical stimulus;GO:0050764 regulation of phagocytosis		Predicted intracellular proteins	Cytosol (Approved); Additional: Actin filaments;Nucleoplasm			(M5915)HALLMARK APICAL JUNCTION	0.0	0.0	0.0	0.0	0.0	0.0	0.0	0.0	0.0	0.0	0.0	0.0	0.0	0.0	0.0	0.0	0.0	0.0	0.0	0.0
CNNM2	54805	symbol	H. sapiens	54805	H. sapiens	CNNM2	cyclin and CBS domain divalent metal cation transport mediator 2	GO:0010960 magnesium ion homeostasis;GO:1903830 magnesium ion transmembrane transport;GO:0015693 magnesium ion transport		Disease related genes	Vesicles (Enhanced)				0.0	0.0	0.0	0.0	0.0	0.0	0.0	0.0	0.0	0.0	0.0	0.0	0.0	0.0	0.0	0.0	0.0	0.0	0.0	0.0
CNNM3	26505	symbol	H. sapiens	26505	H. sapiens	CNNM3	cyclin and CBS domain divalent metal cation transport mediator 3	GO:0010960 magnesium ion homeostasis;GO:0072507 divalent inorganic cation homeostasis;GO:0055065 metal ion homeostasis		Transporters	Cytosol (Approved)				0.0	0.0	0.0	0.0	0.0	0.0	0.0	0.0	0.0	0.0	0.0	0.0	0.0	0.0	0.0	0.0	0.0	0.0	0.0	0.0
CNTNAP3	79937	symbol	H. sapiens	79937	H. sapiens	CNTNAP3	contactin associated protein family member 3	GO:0008037 cell recognition;GO:0007155 cell adhesion;GO:0022610 biological adhesion		Predicted intracellular proteins					0.0	0.0	0.0	0.0	0.0	0.0	0.0	0.0	0.0	0.0	0.0	0.0	0.0	0.0	0.0	0.0	0.0	0.0	0.0	0.0
COG8	84342	symbol	H. sapiens	84342	H. sapiens	COG8	component of oligomeric golgi complex 8	GO:0006891 intra-Golgi vesicle-mediated transport;GO:0048193 Golgi vesicle transport;GO:0016192 vesicle-mediated transport		Predicted intracellular proteins					0.0	0.0	0.0	0.0	0.0	0.0	0.0	0.0	0.0	0.0	0.0	0.0	0.0	0.0	0.0	0.0	0.0	0.0	0.0	0.0
COL4A1	1282	symbol	H. sapiens	1282	H. sapiens	COL4A1	collagen type IV alpha 1 chain	GO:0061304 retinal blood vessel morphogenesis;GO:0061299 retina vasculature morphogenesis in camera-type eye;GO:0038063 collagen-activated tyrosine kinase receptor signaling pathway		Predicted intracellular proteins; Predicted secreted proteins; Disease related genes			(M5887)NABA BASEMENT MEMBRANES; (M53)PID INTEGRIN3 PATHWAY; (M3005)NABA COLLAGENS	(M5905)HALLMARK ADIPOGENESIS; (M5930)HALLMARK EPITHELIAL MESENCHYMAL TRANSITION	1.0	0.0	0.0	0.0	0.0	0.0	0.0	0.0	0.0	0.0	0.0	0.0	0.0	0.0	0.0	0.0	0.0	0.0	0.0	0.0
COL4A2	1284	symbol	H. sapiens	1284	H. sapiens	COL4A2	collagen type IV alpha 2 chain	GO:0038063 collagen-activated tyrosine kinase receptor signaling pathway;GO:0038065 collagen-activated signaling pathway;GO:0035987 endodermal cell differentiation		Cancer-related genes:Candidate cancer biomarkers; Predicted intracellular proteins; Predicted secreted proteins; Disease related genes	Vesicles (Supported)		(M5887)NABA BASEMENT MEMBRANES; (M3005)NABA COLLAGENS; (M5884)NABA CORE MATRISOME	(M5909)HALLMARK MYOGENESIS; (M5921)HALLMARK COMPLEMENT; (M5930)HALLMARK EPITHELIAL MESENCHYMAL TRANSITION	1.0	0.0	0.0	0.0	0.0	0.0	0.0	0.0	0.0	0.0	0.0	0.0	0.0	0.0	0.0	0.0	0.0	0.0	0.0	0.0
COL4A5	1287	symbol	H. sapiens	1287	H. sapiens	COL4A5	collagen type IV alpha 5 chain	GO:0038063 collagen-activated tyrosine kinase receptor signaling pathway;GO:0038065 collagen-activated signaling pathway;GO:0007528 neuromuscular junction development		Cancer-related genes:Candidate cancer biomarkers; Predicted intracellular proteins; Predicted secreted proteins; Disease related genes	Plasma membrane (Approved); Additional: Vesicles		(M5887)NABA BASEMENT MEMBRANES; (M53)PID INTEGRIN3 PATHWAY; (M3005)NABA COLLAGENS		1.0	0.0	0.0	0.0	0.0	0.0	0.0	0.0	0.0	0.0	0.0	0.0	0.0	0.0	0.0	0.0	0.0	0.0	0.0	0.0
COL4A6	1288	symbol	H. sapiens	1288	H. sapiens	COL4A6	collagen type IV alpha 6 chain	GO:0038063 collagen-activated tyrosine kinase receptor signaling pathway;GO:0038065 collagen-activated signaling pathway;GO:0071230 cellular response to amino acid stimulus		Predicted secreted proteins; Disease related genes	Endoplasmic reticulum (Approved)		(M5887)NABA BASEMENT MEMBRANES; (M53)PID INTEGRIN3 PATHWAY; (M3005)NABA COLLAGENS		0.0	0.0	0.0	0.0	0.0	0.0	0.0	0.0	0.0	0.0	0.0	0.0	0.0	0.0	0.0	0.0	0.0	0.0	0.0	0.0
COMMD5	28991	symbol	H. sapiens	28991	H. sapiens	COMMD5	COMM domain containing 5			Predicted intracellular proteins	Cytosol;Nucleoplasm (Supported)				0.0	0.0	0.0	0.0	0.0	0.0	0.0	0.0	0.0	0.0	0.0	0.0	0.0	1.0	0.0	0.0	0.0	0.0	0.0	0.0
COMT	1312	symbol	H. sapiens	1312	H. sapiens	COMT	catechol-O-methyltransferase	GO:0031337 positive regulation of sulfur amino acid metabolic process;GO:0050668 positive regulation of homocysteine metabolic process;GO:0050666 regulation of homocysteine metabolic process		ENZYME proteins:Transferases; Predicted intracellular proteins; FDA approved drug targets:Small molecule drugs; Enzymes; Disease related genes	Vesicles (Enhanced); Additional: Endoplasmic reticulum	Ademetionine; Tolcapone; Entacapone; 3,5-Dinitrocatechol; 2-Methoxyestradiol; BIA; N-[(E)-3-[(2R,3S,4R,5R)-5-(6-Aminopurin-9-yl)-3,4-dihydroxyoxolan-2-yl]prop-2-enyl]-2,3-dihydroxy-5-nitrobenzamide; Nialamide; (3,4-DIHYDROXY-2-NITROPHENYL)(PHENYL)METHANONE; 7,8-dihydroxy-4-phenyl-2H-chromen-2-one; Opicapone		(M5934)HALLMARK XENOBIOTIC METABOLISM	0.0	1.0	0.0	0.0	0.0	0.0	0.0	0.0	0.0	0.0	0.0	0.0	0.0	0.0	0.0	0.0	0.0	0.0	0.0	0.0
COPE	11316	symbol	H. sapiens	11316	H. sapiens	COPE	COPI coat complex subunit epsilon	GO:0099612 protein localization to axon;GO:0006891 intra-Golgi vesicle-mediated transport;GO:0006890 retrograde vesicle-mediated transport, Golgi to endoplasmic reticulum		Predicted intracellular proteins	Golgi apparatus (Enhanced)			(M5910)HALLMARK PROTEIN SECRETION	0.0	0.0	0.0	0.0	0.0	0.0	0.0	0.0	0.0	0.0	0.0	0.0	0.0	0.0	0.0	0.0	0.0	0.0	0.0	0.0
COPG1	22820	symbol	H. sapiens	22820	H. sapiens	COPG1	COPI coat complex subunit gamma 1	GO:0051683 establishment of Golgi localization;GO:0051645 Golgi localization;GO:0006891 intra-Golgi vesicle-mediated transport		Predicted intracellular proteins	Golgi apparatus (Supported); Additional: Cytosol;Nucleoplasm	S-(Dimethylarsenic)Cysteine			0.0	0.0	0.0	0.0	0.0	0.0	0.0	0.0	0.0	0.0	0.0	0.0	1.0	0.0	0.0	0.0	0.0	0.0	0.0	0.0
COQ9	57017	symbol	H. sapiens	57017	H. sapiens	COQ9	coenzyme Q9	GO:0006744 ubiquinone biosynthetic process;GO:1901663 quinone biosynthetic process;GO:0006743 ubiquinone metabolic process		Predicted intracellular proteins; Disease related genes	Cytosol;Mitochondria (Approved)			(M5905)HALLMARK ADIPOGENESIS	0.0	0.0	0.0	0.0	1.0	0.0	0.0	0.0	0.0	0.0	0.0	0.0	0.0	0.0	0.0	0.0	0.0	0.0	0.0	0.0
COX14	84987	symbol	H. sapiens	84987	H. sapiens	COX14	cytochrome c oxidase assembly factor COX14	GO:0033617 mitochondrial cytochrome c oxidase assembly;GO:0008535 respiratory chain complex IV assembly;GO:0017004 cytochrome complex assembly		Disease related genes	Mitochondria (Supported)				1.0	0.0	0.0	1.0	1.0	0.0	0.0	0.0	0.0	0.0	0.0	0.0	0.0	0.0	0.0	0.0	0.0	1.0	0.0	0.0
COX16	51241	symbol	H. sapiens	51241	H. sapiens	COX16	cytochrome c oxidase assembly factor COX16	GO:0033617 mitochondrial cytochrome c oxidase assembly;GO:0008535 respiratory chain complex IV assembly;GO:0017004 cytochrome complex assembly		Predicted intracellular proteins	Mitochondria (Supported)				1.0	0.0	0.0	1.0	1.0	0.0	0.0	0.0	0.0	0.0	0.0	0.0	0.0	0.0	0.0	0.0	0.0	1.0	0.0	0.0
COX20	116228	symbol	H. sapiens	116228	H. sapiens	COX20	cytochrome c oxidase assembly factor COX20	GO:0033617 mitochondrial cytochrome c oxidase assembly;GO:0008535 respiratory chain complex IV assembly;GO:0017004 cytochrome complex assembly		Disease related genes	Mitochondria (Enhanced)				1.0	0.0	0.0	1.0	1.0	0.0	0.0	0.0	0.0	0.0	0.0	0.0	0.0	0.0	0.0	0.0	0.0	1.0	0.0	0.0
COX5B	1329	symbol	H. sapiens	1329	H. sapiens	COX5B	cytochrome c oxidase subunit 5B	GO:0006123 mitochondrial electron transport, cytochrome c to oxygen;GO:0007585 respiratory gaseous exchange by respiratory system;GO:0019646 aerobic electron transport chain		Predicted intracellular proteins; Transporters:Primary Active Transporters	Mitochondria (Enhanced)	Cholic Acid; N-Formylmethionine		(M5936)HALLMARK OXIDATIVE PHOSPHORYLATION	1.0	0.0	0.0	0.0	1.0	0.0	0.0	0.0	0.0	0.0	0.0	0.0	0.0	0.0	0.0	0.0	0.0	1.0	0.0	0.0
COX6A1	1337	symbol	H. sapiens	1337	H. sapiens	COX6A1	cytochrome c oxidase subunit 6A1	GO:0006123 mitochondrial electron transport, cytochrome c to oxygen;GO:0019646 aerobic electron transport chain;GO:0042773 ATP synthesis coupled electron transport		Disease related genes	Mitochondria (Supported)			(M5905)HALLMARK ADIPOGENESIS; (M5936)HALLMARK OXIDATIVE PHOSPHORYLATION	1.0	0.0	0.0	0.0	1.0	0.0	0.0	0.0	0.0	0.0	0.0	0.0	0.0	0.0	0.0	0.0	0.0	1.0	0.0	0.0
CRELD2	79174	symbol	H. sapiens	79174	H. sapiens	CRELD2	cysteine rich with EGF like domains 2			Predicted secreted proteins			(M3008)NABA ECM GLYCOPROTEINS; (M5884)NABA CORE MATRISOME; (M5889)NABA MATRISOME		0.0	0.0	0.0	0.0	0.0	0.0	0.0	0.0	0.0	0.0	0.0	0.0	0.0	0.0	0.0	0.0	0.0	0.0	0.0	0.0
CRIP2	1397	symbol	H. sapiens	1397	H. sapiens	CRIP2	cysteine rich protein 2	GO:0030097 hemopoiesis;GO:0048534 hematopoietic or lymphoid organ development;GO:0002520 immune system development		Predicted intracellular proteins	Nucleoli (Approved); Additional: Nucleoplasm;Plasma membrane			(M5946)HALLMARK COAGULATION	0.0	0.0	0.0	0.0	0.0	0.0	0.0	0.0	0.0	0.0	0.0	0.0	1.0	0.0	0.0	0.0	0.0	0.0	0.0	0.0
CSNK1E	1454	symbol	H. sapiens	1454	H. sapiens	CSNK1E	casein kinase 1 epsilon	GO:1904958 positive regulation of midbrain dopaminergic neuron differentiation;GO:1905424 regulation of Wnt-mediated midbrain dopaminergic neuron differentiation;GO:1905426 positive regulation of Wnt-mediated midbrain dopaminergic neuron differentiation	CK1 Ser/Thr protein kinase family	Cancer-related genes:Candidate cancer biomarkers; ENZYME proteins:Transferases; Predicted intracellular proteins; Enzymes; Kinases:CK1 Ser/Thr protein kinases	Cytosol;Nucleoplasm (Approved)	Seliciclib	(M95)PID CIRCADIAN PATHWAY; (M31)PID BETA CATENIN DEG PATHWAY; (M219)PID HEDGEHOG GLI PATHWAY	(M5895)HALLMARK WNT BETA CATENIN SIGNALING	1.0	1.0	0.0	0.0	0.0	0.0	0.0	0.0	0.0	0.0	0.0	0.0	0.0	1.0	0.0	1.0	0.0	0.0	0.0	1.0
CSNK1G2	1455	symbol	H. sapiens	1455	H. sapiens	CSNK1G2	casein kinase 1 gamma 2	GO:0030148 sphingolipid biosynthetic process;GO:0090263 positive regulation of canonical Wnt signaling pathway;GO:0030177 positive regulation of Wnt signaling pathway	CK1 Ser/Thr protein kinase family	ENZYME proteins:Transferases; Predicted intracellular proteins; Enzymes; Kinases:CK1 Ser/Thr protein kinases	Vesicles (Approved)	IC261; N-(2-Aminoethyl)-5-Chloroisoquinoline-8-Sulfonamide; 5-iodotubercidin	(M219)PID HEDGEHOG GLI PATHWAY; (M136)PID FOXO PATHWAY; (M261)PID P53 REGULATION PATHWAY		0.0	1.0	0.0	0.0	0.0	0.0	0.0	0.0	0.0	0.0	0.0	0.0	0.0	0.0	0.0	1.0	0.0	0.0	0.0	0.0
CSRP1	1465	symbol	H. sapiens	1465	H. sapiens	CSRP1	cysteine and glycine rich protein 1	GO:0045214 sarcomere organization;GO:0030239 myofibril assembly;GO:0055002 striated muscle cell development		Predicted intracellular proteins		Artenimol		(M5946)HALLMARK COAGULATION; (M5921)HALLMARK COMPLEMENT	1.0	0.0	0.0	0.0	0.0	0.0	0.0	0.0	0.0	0.0	1.0	0.0	1.0	0.0	0.0	0.0	0.0	0.0	0.0	0.0
CST3	1471	symbol	H. sapiens	1471	H. sapiens	CST3	cystatin C	GO:0010711 negative regulation of collagen catabolic process;GO:0060311 negative regulation of elastin catabolic process;GO:0060313 negative regulation of blood vessel remodeling		Cancer-related genes:Candidate cancer biomarkers; Predicted secreted proteins; Disease related genes	Golgi apparatus;Vesicles (Supported)		(M3468)NABA ECM REGULATORS; (M5885)NABA MATRISOME ASSOCIATED; (M5889)NABA MATRISOME		0.0	1.0	0.0	0.0	0.0	0.0	0.0	0.0	0.0	0.0	0.0	0.0	0.0	0.0	0.0	0.0	0.0	0.0	0.0	1.0
CTB-113P19.1						None	None	None	None	None	None	None	None	None	nan	nan	nan	nan	nan	nan	nan	nan	nan	nan	nan	nan	nan	nan	nan	nan	nan	nan	nan	nan
CTBP1	1487	symbol	H. sapiens	1487	H. sapiens	CTBP1	C-terminal binding protein 1	GO:0090241 negative regulation of histone H4 acetylation;GO:0090239 regulation of histone H4 acetylation;GO:0050872 white fat cell differentiation		Predicted intracellular proteins	Nucleoplasm (Enhanced)	Formic acid	(M84)PID ATM PATHWAY; (M70)PID PS1 PATHWAY; (M288)PID HES HEY PATHWAY	(M5949)HALLMARK PEROXISOME	0.0	1.0	1.0	0.0	0.0	0.0	0.0	0.0	0.0	0.0	0.0	0.0	0.0	0.0	0.0	0.0	0.0	1.0	0.0	0.0
CTBP1-AS	285463	symbol	H. sapiens	285463	H. sapiens	CTBP1-AS	CTBP1 antisense RNA								0.0	0.0	0.0	0.0	0.0	0.0	0.0	0.0	0.0	0.0	0.0	0.0	0.0	0.0	0.0	0.0	0.0	0.0	0.0	0.0
CTDP1	9150	symbol	H. sapiens	9150	H. sapiens	CTDP1	CTD phosphatase subunit 1	GO:0070940 dephosphorylation of RNA polymerase II C-terminal domain;GO:0061052 negative regulation of cell growth involved in cardiac muscle cell development;GO:0043923 positive regulation by host of viral transcription		Predicted intracellular proteins; ENZYME proteins:Hydrolases; Enzymes; Disease related genes; Potential drug targets	Nucleoplasm (Approved); Additional: Vesicles				0.0	0.0	0.0	0.0	0.0	0.0	1.0	0.0	0.0	0.0	1.0	0.0	0.0	0.0	0.0	0.0	0.0	1.0	0.0	0.0
CTNNBIP1	56998	symbol	H. sapiens	56998	H. sapiens	CTNNBIP1	catenin beta interacting protein 1	GO:0002528 regulation of vascular permeability involved in acute inflammatory response;GO:0060633 negative regulation of transcription initiation from RNA polymerase II promoter;GO:2000143 negative regulation of DNA-templated transcription, initiation		Predicted intracellular proteins	Cell Junctions;Mitochondria;Plasma membrane (Approved)		(M223)PID BETA CATENIN NUC PATHWAY; (M5493)WNT SIGNALING		0.0	1.0	0.0	0.0	0.0	0.0	1.0	0.0	0.0	0.0	0.0	0.0	0.0	0.0	0.0	1.0	0.0	0.0	0.0	0.0
CTNND1	1500	symbol	H. sapiens	1500	H. sapiens	CTNND1	catenin delta 1	GO:0044331 cell-cell adhesion mediated by cadherin;GO:0099072 regulation of postsynaptic membrane neurotransmitter receptor levels;GO:0090090 negative regulation of canonical Wnt signaling pathway		Cancer-related genes:Mutational cancer driver genes; Disease related genes; Predicted intracellular proteins	Plasma membrane (Enhanced)		(M184)PID ECADHERIN KERATINOCYTE PATHWAY; (M266)PID NCADHERIN PATHWAY; (M156)PID ECADHERIN NASCENT AJ PATHWAY	(M5915)HALLMARK APICAL JUNCTION	0.0	0.0	0.0	0.0	0.0	0.0	0.0	0.0	0.0	0.0	0.0	0.0	1.0	0.0	0.0	1.0	0.0	0.0	0.0	0.0
CTNND2	1501	symbol	H. sapiens	1501	H. sapiens	CTNND2	catenin delta 2	GO:0060997 dendritic spine morphogenesis;GO:0097061 dendritic spine organization;GO:0106027 neuron projection organization		Predicted intracellular proteins; Disease related genes	Cell Junctions;Nucleoplasm (Approved); Additional: Cytosol				0.0	0.0	0.0	0.0	0.0	0.0	0.0	0.0	0.0	0.0	0.0	0.0	0.0	0.0	0.0	1.0	0.0	0.0	0.0	0.0
CTTN	2017	symbol	H. sapiens	2017	H. sapiens	CTTN	cortactin	GO:0006930 substrate-dependent cell migration, cell extension;GO:0097062 dendritic spine maintenance;GO:0006929 substrate-dependent cell migration		Cancer-related genes:Mutational cancer driver genes; Predicted intracellular proteins	Cytosol;Plasma membrane (Supported); Additional: Golgi apparatus;Vesicles		(M251)PID SYNDECAN 3 PATHWAY; (M266)PID NCADHERIN PATHWAY; (M156)PID ECADHERIN NASCENT AJ PATHWAY	(M5893)HALLMARK MITOTIC SPINDLE	0.0	1.0	0.0	1.0	0.0	0.0	0.0	0.0	0.0	0.0	0.0	1.0	0.0	0.0	0.0	0.0	0.0	0.0	0.0	0.0
CTU1	90353	symbol	H. sapiens	90353	H. sapiens	CTU1	cytosolic thiouridylase subunit 1	GO:0002143 tRNA wobble position uridine thiolation;GO:0032447 protein urmylation;GO:0034227 tRNA thio-modification		Predicted intracellular proteins					1.0	0.0	0.0	0.0	0.0	0.0	0.0	0.0	0.0	1.0	0.0	0.0	0.0	0.0	0.0	0.0	0.0	0.0	0.0	0.0
CTU2	348180	symbol	H. sapiens	348180	H. sapiens	CTU2	cytosolic thiouridylase subunit 2	GO:0002143 tRNA wobble position uridine thiolation;GO:0032447 protein urmylation;GO:0034227 tRNA thio-modification		Predicted intracellular proteins	Mitochondria (Supported)				1.0	0.0	0.0	0.0	0.0	0.0	0.0	0.0	0.0	1.0	0.0	0.0	0.0	0.0	0.0	0.0	0.0	0.0	0.0	0.0
CTXN1	404217	symbol	H. sapiens	404217	H. sapiens	CTXN1	cortexin 1				Nucleoplasm (Approved); Additional: Cell Junctions;Plasma membrane				0.0	0.0	0.0	0.0	0.0	0.0	0.0	0.0	0.0	0.0	0.0	0.0	0.0	0.0	0.0	0.0	0.0	0.0	0.0	0.0
CUEDC1	404093	symbol	H. sapiens	404093	H. sapiens	CUEDC1	CUE domain containing 1			Predicted intracellular proteins	Cytosol;Plasma membrane (Approved); Additional: Centrosome				0.0	0.0	0.0	0.0	0.0	0.0	0.0	0.0	0.0	0.0	0.0	0.0	0.0	0.0	0.0	0.0	0.0	0.0	0.0	0.0
CUTA	51596	symbol	H. sapiens	51596	H. sapiens	CUTA	cutA divalent cation tolerance homolog	GO:0010038 response to metal ion;GO:0010035 response to inorganic substance;GO:0008104 protein localization		Predicted intracellular proteins; Predicted secreted proteins	Focal adhesion sites;Plasma membrane (Approved)				0.0	0.0	0.0	0.0	0.0	0.0	0.0	0.0	0.0	0.0	0.0	0.0	0.0	0.0	0.0	0.0	0.0	0.0	0.0	0.0
CXCL1	2919	symbol	H. sapiens	2919	H. sapiens	CXCL1	C-X-C motif chemokine ligand 1	GO:0061844 antimicrobial humoral immune response mediated by antimicrobial peptide;GO:0070098 chemokine-mediated signaling pathway;GO:1990868 response to chemokine		Cancer-related genes:Candidate cancer biomarkers; Predicted secreted proteins			(M196)PID IL23 PATHWAY; (M5883)NABA SECRETED FACTORS; (M5885)NABA MATRISOME ASSOCIATED	(M5897)HALLMARK IL6 JAK STAT3 SIGNALING; (M5890)HALLMARK TNFA SIGNALING VIA NFKB; (M5921)HALLMARK COMPLEMENT	0.0	0.0	0.0	0.0	0.0	0.0	0.0	0.0	0.0	0.0	0.0	0.0	0.0	0.0	0.0	0.0	0.0	0.0	1.0	0.0
CXCL2	2920	symbol	H. sapiens	2920	H. sapiens	CXCL2	C-X-C motif chemokine ligand 2	GO:0061844 antimicrobial humoral immune response mediated by antimicrobial peptide;GO:0070098 chemokine-mediated signaling pathway;GO:1990868 response to chemokine		Cancer-related genes:Candidate cancer biomarkers; Predicted secreted proteins			(M7871)ST GRANULE CELL SURVIVAL PATHWAY; (M5883)NABA SECRETED FACTORS; (M5885)NABA MATRISOME ASSOCIATED	(M5941)HALLMARK UV RESPONSE UP; (M5890)HALLMARK TNFA SIGNALING VIA NFKB	0.0	0.0	0.0	0.0	0.0	0.0	0.0	0.0	0.0	0.0	0.0	0.0	0.0	0.0	0.0	0.0	0.0	0.0	1.0	0.0
CXCL3	2921	symbol	H. sapiens	2921	H. sapiens	CXCL3	C-X-C motif chemokine ligand 3	GO:0061844 antimicrobial humoral immune response mediated by antimicrobial peptide;GO:0070098 chemokine-mediated signaling pathway;GO:1990868 response to chemokine		Predicted secreted proteins			(M5883)NABA SECRETED FACTORS; (M5885)NABA MATRISOME ASSOCIATED; (M5889)NABA MATRISOME	(M5897)HALLMARK IL6 JAK STAT3 SIGNALING; (M5890)HALLMARK TNFA SIGNALING VIA NFKB	0.0	0.0	0.0	0.0	0.0	0.0	0.0	0.0	0.0	0.0	0.0	0.0	0.0	0.0	0.0	0.0	0.0	0.0	1.0	0.0
CXCL8	3576	symbol	H. sapiens	3576	H. sapiens	CXCL8	C-X-C motif chemokine ligand 8	GO:2000535 regulation of entry of bacterium into host cell;GO:0035635 entry of bacterium into host cell;GO:0050930 induction of positive chemotaxis		Cancer-related genes:Candidate cancer biomarkers; Candidate cardiovascular disease genes; Predicted secreted proteins		ABT-510; MDX-018; Rivanicline; Tapinarof	(M251)PID SYNDECAN 3 PATHWAY; (M252)PID IL8 CXCR1 PATHWAY; (M240)PID SYNDECAN 2 PATHWAY	(M5930)HALLMARK EPITHELIAL MESENCHYMAL TRANSITION; (M5932)HALLMARK INFLAMMATORY RESPONSE	1.0	1.0	0.0	0.0	1.0	0.0	0.0	1.0	0.0	0.0	0.0	0.0	1.0	0.0	0.0	0.0	0.0	0.0	1.0	0.0
CXCR5	643	symbol	H. sapiens	643	H. sapiens	CXCR5	C-X-C motif chemokine receptor 5	GO:0048535 lymph node development;GO:0032467 positive regulation of cytokinesis;GO:0070098 chemokine-mediated signaling pathway		G-protein coupled receptors:Chemokines and chemotactic factors receptors; G-protein coupled receptors:GPCRs excl olfactory receptors; CD markers					0.0	0.0	0.0	0.0	0.0	0.0	0.0	0.0	0.0	0.0	0.0	0.0	0.0	0.0	0.0	0.0	0.0	0.0	0.0	0.0
CXorf40A	91966	gene_synonym	H. sapiens	91966	H. sapiens	EOLA1	endothelium and lymphocyte associated ASCH domain 1	GO:0032635 interleukin-6 production;GO:0032675 regulation of interleukin-6 production;GO:0001817 regulation of cytokine production		Predicted intracellular proteins					0.0	0.0	0.0	0.0	0.0	0.0	0.0	0.0	0.0	0.0	0.0	0.0	0.0	0.0	0.0	0.0	0.0	0.0	0.0	0.0
CXXC4	80319	symbol	H. sapiens	80319	H. sapiens	CXXC4	CXXC finger protein 4	GO:0007352 zygotic specification of dorsal/ventral axis;GO:0009950 dorsal/ventral axis specification;GO:0000578 embryonic axis specification		Predicted intracellular proteins	Golgi apparatus (Uncertain); Additional: Nucleoplasm		(M17761)ST WNT BETA CATENIN PATHWAY; (M5493)WNT SIGNALING		0.0	0.0	0.0	0.0	0.0	0.0	0.0	0.0	0.0	0.0	0.0	0.0	0.0	0.0	0.0	1.0	0.0	0.0	0.0	0.0
CYBA	1535	symbol	H. sapiens	1535	H. sapiens	CYBA	cytochrome b-245 alpha chain	GO:0003083 negative regulation of renal output by angiotensin;GO:0003106 negative regulation of glomerular filtration by angiotensin;GO:0014895 smooth muscle hypertrophy		Predicted intracellular proteins; Transporters:Transport Electron Carriers; Potential drug targets; Disease related genes			(M278)PID RAC1 PATHWAY		1.0	1.0	0.0	0.0	1.0	0.0	0.0	0.0	0.0	0.0	0.0	0.0	0.0	1.0	0.0	0.0	0.0	1.0	1.0	0.0
CYFIP1	23191	symbol	H. sapiens	23191	H. sapiens	CYFIP1	cytoplasmic FMR1 interacting protein 1	GO:0099578 regulation of translation at postsynapse, modulating synaptic transmission;GO:0140245 regulation of translation at postsynapse;GO:1903422 negative regulation of synaptic vesicle recycling		Predicted intracellular proteins				(M5947)HALLMARK IL2 STAT5 SIGNALING	1.0	1.0	0.0	0.0	0.0	0.0	0.0	0.0	0.0	0.0	0.0	0.0	0.0	0.0	0.0	0.0	0.0	0.0	0.0	0.0
CYP20A1	57404	symbol	H. sapiens	57404	H. sapiens	CYP20A1	cytochrome P450 family 20 subfamily A member 1			Predicted intracellular proteins	Actin filaments;Cell Junctions;Plasma membrane (Uncertain); Additional: Nucleoplasm				0.0	0.0	0.0	0.0	0.0	0.0	0.0	0.0	0.0	0.0	0.0	0.0	0.0	0.0	0.0	0.0	0.0	0.0	0.0	0.0
CYP26C1	340665	symbol	H. sapiens	340665	H. sapiens	CYP26C1	cytochrome P450 family 26 subfamily C member 1	GO:0016103 diterpenoid catabolic process;GO:0034653 retinoic acid catabolic process;GO:0016115 terpenoid catabolic process		Disease related genes		Alitretinoin; Tretinoin			0.0	1.0	0.0	0.0	0.0	0.0	0.0	0.0	0.0	0.0	0.0	0.0	0.0	0.0	0.0	0.0	0.0	0.0	0.0	0.0
CYP51A1	1595	symbol	H. sapiens	1595	H. sapiens	CYP51A1	cytochrome P450 family 51 subfamily A member 1	GO:1900222 negative regulation of amyloid-beta clearance;GO:1900221 regulation of amyloid-beta clearance;GO:0097242 amyloid-beta clearance		Predicted intracellular proteins; Enzymes; ENZYME proteins:Oxidoreductases; FDA approved drug targets:Small molecule drugs	Endoplasmic reticulum (Enhanced)	Tioconazole; Itraconazole; Levoketoconazole; (S)-econazole		(M5892)HALLMARK CHOLESTEROL HOMEOSTASIS; (M5924)HALLMARK MTORC1 SIGNALING	1.0	0.0	0.0	0.0	0.0	0.0	0.0	0.0	0.0	0.0	0.0	0.0	0.0	0.0	0.0	0.0	0.0	0.0	0.0	1.0
D2HGDH	728294	symbol	H. sapiens	728294	H. sapiens	D2HGDH	D-2-hydroxyglutarate dehydrogenase	GO:0006108 malate metabolic process;GO:0032025 response to cobalt ion;GO:0006103 2-oxoglutarate metabolic process		Predicted intracellular proteins; Disease related genes	Mitochondria (Supported)			(M5935)HALLMARK FATTY ACID METABOLISM	0.0	0.0	0.0	0.0	1.0	0.0	0.0	0.0	0.0	0.0	0.0	0.0	0.0	0.0	0.0	0.0	0.0	0.0	0.0	0.0
DACT1	51339	symbol	H. sapiens	51339	H. sapiens	DACT1	dishevelled binding antagonist of beta catenin 1	GO:0048619 embryonic hindgut morphogenesis;GO:1904863 regulation of beta-catenin-TCF complex assembly;GO:1904864 negative regulation of beta-catenin-TCF complex assembly		Predicted intracellular proteins; Disease related genes	Nucleoplasm (Supported)		(M17761)ST WNT BETA CATENIN PATHWAY		0.0	1.0	0.0	0.0	0.0	0.0	0.0	0.0	0.0	0.0	0.0	1.0	0.0	0.0	0.0	1.0	1.0	1.0	0.0	1.0
DACT2	168002	symbol	H. sapiens	168002	H. sapiens	DACT2	dishevelled binding antagonist of beta catenin 2	GO:0072061 inner medullary collecting duct development;GO:1900108 negative regulation of nodal signaling pathway;GO:1900107 regulation of nodal signaling pathway		Predicted intracellular proteins			(M286)PID TGFBR PATHWAY		0.0	0.0	0.0	0.0	0.0	0.0	0.0	0.0	0.0	0.0	0.0	0.0	0.0	0.0	0.0	0.0	0.0	0.0	0.0	0.0
DACT3	147906	symbol	H. sapiens	147906	H. sapiens	DACT3	dishevelled binding antagonist of beta catenin 3	GO:0010719 negative regulation of epithelial to mesenchymal transition;GO:0010717 regulation of epithelial to mesenchymal transition;GO:0090090 negative regulation of canonical Wnt signaling pathway		Predicted intracellular proteins	Vesicles (Approved); Additional: Nucleoplasm				0.0	0.0	0.0	0.0	0.0	0.0	1.0	0.0	0.0	0.0	0.0	0.0	0.0	0.0	0.0	1.0	0.0	0.0	0.0	0.0
DAGLA	747	symbol	H. sapiens	747	H. sapiens	DAGLA	diacylglycerol lipase alpha	GO:0046340 diacylglycerol catabolic process;GO:0098920 retrograde trans-synaptic signaling by lipid;GO:0098921 retrograde trans-synaptic signaling by endocannabinoid		Disease related genes			(M266)PID NCADHERIN PATHWAY		0.0	0.0	0.0	0.0	0.0	0.0	0.0	0.0	0.0	0.0	0.0	0.0	0.0	0.0	0.0	0.0	0.0	0.0	0.0	0.0
DAPK3	1613	symbol	H. sapiens	1613	H. sapiens	DAPK3	death associated protein kinase 3	GO:0031038 myosin II filament organization;GO:0043519 regulation of myosin II filament organization;GO:0031033 myosin filament organization	CAMK Ser/Thr protein kinase family	ENZYME proteins:Transferases; Kinases:CAMK Ser/Thr protein kinases; Enzymes; Predicted intracellular proteins	Nucleoplasm (Supported)	2-tert-butyl-9-fluoro-1,6-dihydrobenzo[h]imidazo[4,5-f]isoquinolin-7-one; 4-(6-{[(1R)-1-(hydroxymethyl)propyl]amino}imidazo[1,2-b]pyridazin-3-yl)benzoic acid; (4R)-7,8-dichloro-1',9-dimethyl-1-oxo-1,2,4,9-tetrahydrospiro[beta-carboline-3,4'-piperidine]-4-carbonitrile; Fostamatinib			1.0	0.0	0.0	0.0	0.0	0.0	0.0	0.0	0.0	0.0	0.0	1.0	0.0	0.0	0.0	1.0	0.0	1.0	0.0	0.0
DAW1	164781	symbol	H. sapiens	164781	H. sapiens	DAW1	dynein assembly factor with WD repeats 1	GO:0090660 cerebrospinal fluid circulation;GO:0036158 outer dynein arm assembly;GO:0003351 epithelial cilium movement involved in extracellular fluid movement		Predicted intracellular proteins	Nucleoplasm (Approved); Additional: Nuclear bodies;Plasma membrane				0.0	0.0	0.0	0.0	0.0	0.0	0.0	0.0	0.0	0.0	1.0	0.0	0.0	0.0	0.0	0.0	0.0	0.0	0.0	0.0
DBH-AS1	138948	symbol	H. sapiens	138948	H. sapiens	DBH-AS1	DBH antisense RNA 1								0.0	0.0	0.0	0.0	0.0	0.0	0.0	0.0	0.0	0.0	0.0	0.0	0.0	0.0	0.0	0.0	0.0	0.0	0.0	0.0
DBNDD2	55861	symbol	H. sapiens	55861	H. sapiens	DBNDD2	dysbindin domain containing 2	GO:0006469 negative regulation of protein kinase activity;GO:0033673 negative regulation of kinase activity;GO:0051348 negative regulation of transferase activity		Predicted intracellular proteins	Cytosol;Nucleoplasm (Approved)				0.0	0.0	0.0	0.0	0.0	0.0	0.0	0.0	0.0	0.0	0.0	0.0	0.0	0.0	0.0	0.0	0.0	0.0	0.0	0.0
DBNL	28988	symbol	H. sapiens	28988	H. sapiens	DBNL	drebrin like	GO:0098974 postsynaptic actin cytoskeleton organization;GO:0099188 postsynaptic cytoskeleton organization;GO:0071800 podosome assembly		Predicted intracellular proteins	Cytosol (Supported); Additional: Nucleoplasm		(M190)PID TCR JNK PATHWAY; (M34)PID TCR PATHWAY		0.0	0.0	0.0	0.0	0.0	0.0	0.0	0.0	0.0	0.0	0.0	0.0	0.0	0.0	0.0	0.0	0.0	1.0	0.0	0.0
DCAKD	79877	symbol	H. sapiens	79877	H. sapiens	DCAKD	dephospho-CoA kinase domain containing	GO:0015937 coenzyme A biosynthetic process;GO:0015936 coenzyme A metabolic process;GO:0033866 nucleoside bisphosphate biosynthetic process		Predicted intracellular proteins	Nucleoplasm (Approved)				0.0	0.0	0.0	0.0	0.0	0.0	0.0	0.0	0.0	0.0	0.0	0.0	0.0	0.0	0.0	0.0	0.0	0.0	0.0	0.0
DCUN1D3	123879	symbol	H. sapiens	123879	H. sapiens	DCUN1D3	defective in cullin neddylation 1 domain containing 3	GO:2000435 negative regulation of protein neddylation;GO:2000436 positive regulation of protein neddylation;GO:2000434 regulation of protein neddylation		Predicted intracellular proteins	Cytosol;Nucleoplasm (Approved)				0.0	0.0	0.0	0.0	0.0	0.0	0.0	0.0	0.0	0.0	0.0	0.0	0.0	1.0	0.0	0.0	0.0	0.0	0.0	0.0
DCXR	51181	symbol	H. sapiens	51181	H. sapiens	DCXR	dicarbonyl and L-xylulose reductase	GO:0005997 xylulose metabolic process;GO:0042732 D-xylose metabolic process;GO:0019321 pentose metabolic process		Predicted intracellular proteins; Enzymes; ENZYME proteins:Oxidoreductases; Disease related genes; Potential drug targets	Microtubules;Nucleoli (Uncertain)	Dihydrogenphosphate; Nicotinamide adenine dinucleotide phosphate		(M5907)HALLMARK ESTROGEN RESPONSE LATE; (M5934)HALLMARK XENOBIOTIC METABOLISM; (M5939)HALLMARK P53 PATHWAY	0.0	0.0	0.0	0.0	0.0	0.0	0.0	0.0	0.0	0.0	0.0	0.0	0.0	0.0	0.0	0.0	0.0	0.0	0.0	0.0
DDA1	79016	symbol	H. sapiens	79016	H. sapiens	DDA1	DET1 and DDB1 associated 1	GO:0032436 positive regulation of proteasomal ubiquitin-dependent protein catabolic process;GO:2000060 positive regulation of ubiquitin-dependent protein catabolic process;GO:1901800 positive regulation of proteasomal protein catabolic process		Predicted intracellular proteins	Nucleoli;Nucleoplasm (Approved)				0.0	0.0	0.0	0.0	0.0	0.0	0.0	0.0	0.0	0.0	0.0	0.0	0.0	1.0	0.0	0.0	0.0	0.0	0.0	1.0
DDAH2	23564	symbol	H. sapiens	23564	H. sapiens	DDAH2	dimethylarginine dimethylaminohydrolase 2	GO:0000052 citrulline metabolic process;GO:0006527 arginine catabolic process;GO:0006525 arginine metabolic process		Predicted intracellular proteins; ENZYME proteins:Hydrolases; Enzymes	Mitochondria (Supported)	Citrulline		(M5934)HALLMARK XENOBIOTIC METABOLISM	0.0	0.0	0.0	0.0	0.0	0.0	0.0	0.0	0.0	0.0	0.0	0.0	0.0	0.0	0.0	0.0	0.0	0.0	0.0	0.0
DDRGK1	65992	symbol	H. sapiens	65992	H. sapiens	DDRGK1	DDRGK domain containing 1	GO:1905550 regulation of protein localization to endoplasmic reticulum;GO:1905552 positive regulation of protein localization to endoplasmic reticulum;GO:1905636 positive regulation of RNA polymerase II regulatory region sequence-specific DNA binding		Predicted intracellular proteins	Endoplasmic reticulum (Supported); Additional: Nucleoli				0.0	1.0	0.0	0.0	0.0	0.0	0.0	0.0	0.0	0.0	0.0	0.0	0.0	1.0	0.0	0.0	1.0	0.0	0.0	1.0
DDT	1652	symbol	H. sapiens	1652	H. sapiens	DDT	D-dopachrome tautomerase	GO:0010760 negative regulation of macrophage chemotaxis;GO:1905522 negative regulation of macrophage migration;GO:0002689 negative regulation of leukocyte chemotaxis		Predicted intracellular proteins; Enzymes; ENZYME proteins:Lyases	Mitochondria (Approved)			(M5905)HALLMARK ADIPOGENESIS; (M5934)HALLMARK XENOBIOTIC METABOLISM	0.0	0.0	0.0	0.0	0.0	0.0	0.0	0.0	0.0	0.0	0.0	0.0	0.0	0.0	0.0	0.0	0.0	0.0	0.0	0.0
DDX49	54555	symbol	H. sapiens	54555	H. sapiens	DDX49	DEAD-box helicase 49	GO:0044357 regulation of rRNA stability;GO:1902374 regulation of rRNA catabolic process;GO:0016075 rRNA catabolic process		Predicted intracellular proteins; ENZYME proteins:Hydrolases; Enzymes	Mitochondria (Approved)				1.0	0.0	0.0	0.0	0.0	0.0	0.0	0.0	0.0	1.0	0.0	0.0	0.0	0.0	0.0	0.0	0.0	0.0	0.0	0.0
DEAF1	10522	symbol	H. sapiens	10522	H. sapiens	DEAF1	DEAF1 transcription factor	GO:0033599 regulation of mammary gland epithelial cell proliferation;GO:0033598 mammary gland epithelial cell proliferation;GO:0061180 mammary gland epithelium development		Transcription factors:alpha-Helices exposed by beta-structures; Predicted intracellular proteins; Disease related genes	Nucleoplasm (Supported); Additional: Nucleoli fibrillar center				0.0	0.0	0.0	0.0	0.0	0.0	0.0	0.0	0.0	0.0	0.0	0.0	0.0	0.0	0.0	0.0	0.0	0.0	0.0	0.0
DECR2	26063	symbol	H. sapiens	26063	H. sapiens	DECR2	2,4-dienoyl-CoA reductase 2	GO:0033540 fatty acid beta-oxidation using acyl-CoA oxidase;GO:0006636 unsaturated fatty acid biosynthetic process;GO:0006635 fatty acid beta-oxidation		Predicted intracellular proteins; Enzymes; ENZYME proteins:Oxidoreductases	Peroxisomes (Approved); Additional: Microtubules				0.0	0.0	0.0	1.0	0.0	0.0	0.0	0.0	0.0	0.0	0.0	0.0	0.0	0.0	0.0	0.0	0.0	0.0	0.0	0.0
DEDD2	162989	symbol	H. sapiens	162989	H. sapiens	DEDD2	death effector domain containing 2	GO:0016075 rRNA catabolic process;GO:0030262 apoptotic nuclear changes;GO:0006921 cellular component disassembly involved in execution phase of apoptosis		Predicted intracellular proteins	Nucleoplasm (Approved)		(M8873)ST FAS SIGNALING PATHWAY		0.0	0.0	0.0	0.0	0.0	0.0	0.0	0.0	0.0	1.0	0.0	1.0	0.0	0.0	0.0	0.0	0.0	0.0	0.0	0.0
DEXI	28955	symbol	H. sapiens	28955	H. sapiens	DEXI	Dexi homolog				Nuclear speckles (Approved); Additional: Cytosol				0.0	0.0	0.0	0.0	0.0	0.0	0.0	0.0	0.0	0.0	0.0	0.0	0.0	0.0	0.0	0.0	0.0	0.0	0.0	0.0
DFFA	1676	symbol	H. sapiens	1676	H. sapiens	DFFA	DNA fragmentation factor subunit alpha	GO:0032076 negative regulation of deoxyribonuclease activity;GO:1902511 negative regulation of apoptotic DNA fragmentation;GO:1903625 negative regulation of DNA catabolic process		Predicted intracellular proteins	Cytosol;Plasma membrane (Supported)		(M7997)SA CASPASE CASCADE; (M197)PID HIV NEF PATHWAY; (M220)PID CASPASE PATHWAY	(M5902)HALLMARK APOPTOSIS	0.0	0.0	0.0	0.0	0.0	0.0	0.0	0.0	0.0	0.0	0.0	0.0	0.0	0.0	0.0	0.0	0.0	1.0	1.0	0.0
DGAT1	8694	symbol	H. sapiens	8694	H. sapiens	DGAT1	diacylglycerol O-acyltransferase 1	GO:0006640 monoacylglycerol biosynthetic process;GO:0034379 very-low-density lipoprotein particle assembly;GO:0046462 monoacylglycerol metabolic process		ENZYME proteins:Transferases; Potential drug targets; Enzymes; Disease related genes	Endoplasmic reticulum (Approved); Additional: Nucleoli			(M5941)HALLMARK UV RESPONSE UP; (M5905)HALLMARK ADIPOGENESIS	0.0	0.0	0.0	0.0	0.0	0.0	0.0	0.0	0.0	0.0	0.0	0.0	0.0	0.0	0.0	0.0	0.0	0.0	0.0	0.0
DGCR6L	85359	symbol	H. sapiens	85359	H. sapiens	DGCR6L	DiGeorge syndrome critical region gene 6 like			Predicted intracellular proteins					0.0	1.0	0.0	0.0	0.0	0.0	0.0	0.0	0.0	0.0	0.0	0.0	0.0	0.0	0.0	0.0	0.0	0.0	0.0	0.0
DGKQ	1609	symbol	H. sapiens	1609	H. sapiens	DGKQ	diacylglycerol kinase theta	GO:2000182 regulation of progesterone biosynthetic process;GO:0006701 progesterone biosynthetic process;GO:2000064 regulation of cortisol biosynthetic process		ENZYME proteins:Transferases; Predicted intracellular proteins; Enzymes					0.0	0.0	0.0	0.0	0.0	0.0	0.0	0.0	0.0	0.0	0.0	0.0	0.0	0.0	0.0	0.0	0.0	0.0	0.0	0.0
DHCR7	1717	symbol	H. sapiens	1717	H. sapiens	DHCR7	7-dehydrocholesterol reductase	GO:0016128 phytosteroid metabolic process;GO:0016129 phytosteroid biosynthetic process;GO:0016131 brassinosteroid metabolic process		Enzymes; Potential drug targets; ENZYME proteins:Oxidoreductases; Disease related genes	Endoplasmic reticulum (Supported)	NADH		(M5892)HALLMARK CHOLESTEROL HOMEOSTASIS; (M5905)HALLMARK ADIPOGENESIS; (M5906)HALLMARK ESTROGEN RESPONSE EARLY	0.0	0.0	0.0	0.0	0.0	0.0	0.0	0.0	0.0	0.0	0.0	0.0	0.0	0.0	0.0	0.0	0.0	0.0	0.0	0.0
DHRS1	115817	symbol	H. sapiens	115817	H. sapiens	DHRS1	dehydrogenase/reductase 1			Predicted intracellular proteins	Nucleoplasm (Approved); Additional: Centrosome;Cytosol			(M5934)HALLMARK XENOBIOTIC METABOLISM	0.0	0.0	0.0	0.0	0.0	0.0	0.0	0.0	0.0	0.0	0.0	0.0	0.0	0.0	0.0	0.0	0.0	0.0	0.0	0.0
DHRS4	10901	symbol	H. sapiens	10901	H. sapiens	DHRS4	dehydrogenase/reductase 4	GO:0042572 retinol metabolic process;GO:2000379 positive regulation of reactive oxygen species metabolic process;GO:0001523 retinoid metabolic process		Predicted intracellular proteins; Enzymes; ENZYME proteins:Oxidoreductases	Vesicles (Approved); Additional: Nuclear membrane	Vitamin A			0.0	1.0	0.0	1.0	0.0	0.0	0.0	0.0	0.0	0.0	0.0	0.0	0.0	0.0	0.0	0.0	0.0	0.0	0.0	0.0
DKFZP434A062	26102	symbol	H. sapiens	26102	H. sapiens	DKFZP434A062	uncharacterized LOC26102								0.0	0.0	0.0	0.0	0.0	0.0	0.0	0.0	0.0	0.0	0.0	0.0	0.0	0.0	0.0	0.0	0.0	0.0	0.0	0.0
DLK2	65989	symbol	H. sapiens	65989	H. sapiens	DLK2	delta like non-canonical Notch ligand 2	GO:0045746 negative regulation of Notch signaling pathway;GO:0008593 regulation of Notch signaling pathway;GO:0045598 regulation of fat cell differentiation			Nucleoplasm (Approved); Additional: Nucleoli;Vesicles			(M5956)HALLMARK KRAS SIGNALING DN	0.0	0.0	0.0	0.0	0.0	0.0	0.0	0.0	0.0	0.0	0.0	0.0	0.0	0.0	0.0	0.0	0.0	0.0	0.0	0.0
DLL3	10683	symbol	H. sapiens	10683	H. sapiens	DLL3	delta like canonical Notch ligand 3	GO:0007386 compartment pattern specification;GO:0048339 paraxial mesoderm development;GO:0001756 somitogenesis		Predicted intracellular proteins; Disease related genes	Nucleoplasm;Plasma membrane (Approved)		(M17)PID NOTCH PATHWAY		0.0	0.0	0.0	0.0	0.0	0.0	1.0	0.0	0.0	0.0	0.0	0.0	0.0	0.0	0.0	0.0	0.0	0.0	0.0	0.0
DMD	1756	symbol	H. sapiens	1756	H. sapiens	DMD	dystrophin	GO:0014809 regulation of skeletal muscle contraction by regulation of release of sequestered calcium ion;GO:0014722 regulation of skeletal muscle contraction by calcium ion signaling;GO:1902083 negative regulation of peptidyl-cysteine S-nitrosylation		Transporters:Accessory Factors Involved in Transport; Predicted intracellular proteins; Disease related genes; Cancer-related genes:Mutational cancer driver genes; Potential drug targets		Golodirsen		(M5901)HALLMARK G2M CHECKPOINT; (M5909)HALLMARK MYOGENESIS	1.0	0.0	0.0	0.0	0.0	0.0	0.0	0.0	0.0	0.0	1.0	0.0	0.0	0.0	0.0	0.0	0.0	0.0	0.0	0.0
DMPK	1760	symbol	H. sapiens	1760	H. sapiens	DMPK	DM1 protein kinase	GO:0014722 regulation of skeletal muscle contraction by calcium ion signaling;GO:0014819 regulation of skeletal muscle contraction;GO:0003009 skeletal muscle contraction	AGC Ser/Thr protein kinase family	ENZYME proteins:Transferases; Kinases:AGC Ser/Thr protein kinases; Predicted intracellular proteins; Enzymes; Disease related genes; Potential drug targets	Cytosol (Approved); Additional: Vesicles	Bisindolylmaleimide VIII		(M5909)HALLMARK MYOGENESIS	0.0	0.0	0.0	0.0	0.0	0.0	0.0	0.0	0.0	0.0	1.0	0.0	0.0	0.0	0.0	0.0	0.0	0.0	0.0	0.0
DMWD	1762	symbol	H. sapiens	1762	H. sapiens	DMWD	DM1 locus, WD repeat containing			Predicted intracellular proteins	Actin filaments;Plasma membrane (Approved)				0.0	0.0	0.0	0.0	0.0	0.0	0.0	0.0	0.0	0.0	0.0	0.0	0.0	0.0	0.0	0.0	0.0	0.0	0.0	0.0
DNAAF2	55172	symbol	H. sapiens	55172	H. sapiens	DNAAF2	dynein axonemal assembly factor 2	GO:0061966 establishment of left/right asymmetry;GO:0036159 inner dynein arm assembly;GO:0036158 outer dynein arm assembly		Predicted intracellular proteins; Disease related genes	Cytosol (Supported)				0.0	0.0	0.0	0.0	0.0	0.0	0.0	0.0	0.0	0.0	0.0	0.0	0.0	0.0	0.0	0.0	0.0	0.0	0.0	0.0
DNAAF3	352909	symbol	H. sapiens	352909	H. sapiens	DNAAF3	dynein axonemal assembly factor 3	GO:0070286 axonemal dynein complex assembly;GO:0044458 motile cilium assembly;GO:0035082 axoneme assembly		Predicted intracellular proteins	Mitochondria (Approved); Additional: Nuclear bodies				0.0	0.0	0.0	0.0	0.0	0.0	0.0	0.0	0.0	0.0	0.0	0.0	0.0	0.0	0.0	0.0	0.0	0.0	0.0	0.0
DNAJB6	10049	symbol	H. sapiens	10049	H. sapiens	DNAJB6	DnaJ heat shock protein family (Hsp40) member B6	GO:0060715 syncytiotrophoblast cell differentiation involved in labyrinthine layer development;GO:0060710 chorio-allantoic fusion;GO:0060717 chorion development		Predicted intracellular proteins; Disease related genes	Nucleoplasm (Enhanced); Additional: Cytosol				1.0	0.0	0.0	0.0	0.0	0.0	0.0	0.0	0.0	0.0	0.0	0.0	0.0	0.0	0.0	0.0	1.0	0.0	0.0	0.0
DNAJC5	80331	symbol	H. sapiens	80331	H. sapiens	DNAJC5	DnaJ heat shock protein family (Hsp40) member C5	GO:0098693 regulation of synaptic vesicle cycle;GO:0061077 chaperone-mediated protein folding;GO:0016079 synaptic vesicle exocytosis		Disease related genes	Golgi apparatus;Plasma membrane (Supported); Additional: Vesicles				0.0	0.0	0.0	0.0	0.0	0.0	0.0	0.0	0.0	0.0	0.0	0.0	0.0	0.0	0.0	0.0	0.0	0.0	0.0	0.0
DNPH1	10591	symbol	H. sapiens	10591	H. sapiens	DNPH1	2'-deoxynucleoside 5'-phosphate N-hydrolase 1	GO:0046055 dGMP catabolic process;GO:0046054 dGMP metabolic process;GO:0009172 purine deoxyribonucleoside monophosphate catabolic process		Predicted intracellular proteins	Nucleoplasm (Approved); Additional: Cytosol				0.0	0.0	0.0	0.0	0.0	0.0	0.0	0.0	0.0	0.0	0.0	0.0	0.0	0.0	0.0	0.0	0.0	0.0	0.0	0.0
DOK1	1796	symbol	H. sapiens	1796	H. sapiens	DOK1	docking protein 1	GO:0038145 macrophage colony-stimulating factor signaling pathway;GO:0036005 response to macrophage colony-stimulating factor;GO:0036006 cellular response to macrophage colony-stimulating factor stimulus		Predicted intracellular proteins	Cytosol (Supported)		(M82)PID RET PATHWAY; (M16)PID INSULIN PATHWAY; (M50)PID PTP1B PATHWAY		1.0	0.0	0.0	0.0	0.0	0.0	0.0	0.0	0.0	0.0	0.0	0.0	1.0	0.0	0.0	0.0	0.0	0.0	0.0	0.0
DOLK	22845	symbol	H. sapiens	22845	H. sapiens	DOLK	dolichol kinase	GO:0043048 dolichyl monophosphate biosynthetic process;GO:0006489 dolichyl diphosphate biosynthetic process;GO:0046465 dolichyl diphosphate metabolic process		ENZYME proteins:Transferases; Potential drug targets; Enzymes; Disease related genes	Nucleoli;Nucleoplasm (Supported); Additional: Cytosol				0.0	0.0	0.0	0.0	0.0	0.0	0.0	0.0	0.0	0.0	0.0	0.0	0.0	0.0	0.0	0.0	0.0	0.0	0.0	0.0
DPH1	1801	symbol	H. sapiens	1801	H. sapiens	DPH1	diphthamide biosynthesis 1	GO:0017182 peptidyl-diphthamide metabolic process;GO:0017183 peptidyl-diphthamide biosynthetic process from peptidyl-histidine;GO:1900247 regulation of cytoplasmic translational elongation		ENZYME proteins:Transferases; Predicted intracellular proteins; Enzymes; Disease related genes; Potential drug targets	Nucleoplasm (Approved); Additional: Cell Junctions				1.0	0.0	0.0	0.0	0.0	0.0	0.0	0.0	0.0	0.0	0.0	0.0	0.0	0.0	0.0	0.0	0.0	0.0	0.0	0.0
DPM3	54344	symbol	H. sapiens	54344	H. sapiens	DPM3	dolichyl-phosphate mannosyltransferase subunit 3, regulatory	GO:0018103 protein C-linked glycosylation;GO:0018211 peptidyl-tryptophan modification;GO:0018317 protein C-linked glycosylation via tryptophan		Disease related genes					0.0	0.0	0.0	0.0	0.0	0.0	0.0	0.0	0.0	0.0	0.0	0.0	0.0	0.0	0.0	0.0	0.0	0.0	0.0	0.0
DPP3	10072	symbol	H. sapiens	10072	H. sapiens	DPP3	dipeptidyl peptidase 3	GO:0006508 proteolysis;GO:0019538 protein metabolic process;GO:1901564 organonitrogen compound metabolic process		Predicted intracellular proteins; ENZYME proteins:Hydrolases; Enzymes; Peptidases:Metallopeptidases	Cytosol (Supported)				0.0	0.0	0.0	0.0	0.0	0.0	0.0	0.0	0.0	0.0	0.0	0.0	0.0	0.0	0.0	0.0	0.0	0.0	0.0	0.0
DPP9-AS1	100131094	symbol	H. sapiens	100131094	H. sapiens	DPP9-AS1	DPP9 antisense RNA 1								0.0	0.0	0.0	0.0	0.0	0.0	0.0	0.0	0.0	0.0	0.0	0.0	0.0	0.0	0.0	0.0	0.0	0.0	0.0	0.0
DPYSL2	1808	symbol	H. sapiens	1808	H. sapiens	DPYSL2	dihydropyrimidinase like 2	GO:0006208 pyrimidine nucleobase catabolic process;GO:0046113 nucleobase catabolic process;GO:0006206 pyrimidine nucleobase metabolic process		Predicted intracellular proteins	Cytosol (Supported); Additional: Plasma membrane	Artenimol		(M5919)HALLMARK HEDGEHOG SIGNALING	1.0	0.0	0.0	0.0	0.0	0.0	0.0	0.0	0.0	0.0	0.0	0.0	0.0	0.0	0.0	0.0	0.0	0.0	0.0	0.0
DRD4	1815	symbol	H. sapiens	1815	H. sapiens	DRD4	dopamine receptor D4	GO:0051586 positive regulation of dopamine uptake involved in synaptic transmission;GO:0051944 positive regulation of catecholamine uptake involved in synaptic transmission;GO:0032417 positive regulation of sodium:proton antiporter activity		FDA approved drug targets:Small molecule drugs; G-protein coupled receptors:GPCRs excl olfactory receptors		Ziprasidone; Cabergoline; Ropinirole; Olanzapine; Clozapine; Loxapine; Remoxipride; Pramipexole; Chlorpromazine; Buspirone; Amoxapine; Lisuride; Apomorphine; Dopamine; Pergolide; Bromocriptine; Quetiapine; Levodopa; Aripiprazole; Paliperidone; Methotrimeprazine; Flibanserin; Iloperidone; Rotigotine; Asenapine; Sumanirole; Perospirone; Pipamperone; Pardoprunox; Aripiprazole lauroxil			0.0	0.0	0.0	0.0	0.0	0.0	0.0	0.0	0.0	0.0	0.0	0.0	0.0	0.0	0.0	1.0	0.0	0.0	0.0	0.0
DRG1	4733	symbol	H. sapiens	4733	H. sapiens	DRG1	developmentally regulated GTP binding protein 1	GO:1901673 regulation of mitotic spindle assembly;GO:0090169 regulation of spindle assembly;GO:0031116 positive regulation of microtubule polymerization		Predicted intracellular proteins	Cytosol;Nuclear bodies (Supported)				1.0	0.0	0.0	0.0	0.0	0.0	0.0	0.0	0.0	0.0	0.0	0.0	0.0	0.0	0.0	0.0	0.0	0.0	0.0	0.0
DSCAM	1826	symbol	H. sapiens	1826	H. sapiens	DSCAM	DS cell adhesion molecule	GO:0060060 post-embryonic retina morphogenesis in camera-type eye;GO:0048842 positive regulation of axon extension involved in axon guidance;GO:0038007 netrin-activated signaling pathway			Golgi apparatus (Approved)		(M285)PID HNF3A PATHWAY; (M200)PID ERA GENOMIC PATHWAY		1.0	0.0	0.0	0.0	0.0	0.0	0.0	0.0	0.0	0.0	0.0	0.0	0.0	0.0	0.0	0.0	0.0	0.0	0.0	0.0
DUSP1	1843	symbol	H. sapiens	1843	H. sapiens	DUSP1	dual specificity phosphatase 1	GO:0090027 negative regulation of monocyte chemotaxis;GO:1903753 negative regulation of p38MAPK cascade;GO:0090231 regulation of spindle checkpoint		Cancer-related genes:Candidate cancer biomarkers; Predicted intracellular proteins; ENZYME proteins:Hydrolases; Enzymes	Nucleoli (Approved); Additional: Cytosol		(M76)PID P38 ALPHA BETA PATHWAY; (M12705)SIG CD40PATHWAYMAP; (M12012)ST P38 MAPK PATHWAY	(M5942)HALLMARK UV RESPONSE DN; (M5890)HALLMARK TNFA SIGNALING VIA NFKB; (M5891)HALLMARK HYPOXIA	0.0	0.0	0.0	0.0	0.0	0.0	0.0	0.0	0.0	0.0	0.0	1.0	0.0	0.0	0.0	0.0	1.0	0.0	0.0	0.0
DUSP28	285193	symbol	H. sapiens	285193	H. sapiens	DUSP28	dual specificity phosphatase 28	GO:0035335 peptidyl-tyrosine dephosphorylation;GO:0006470 protein dephosphorylation;GO:0016311 dephosphorylation		Predicted intracellular proteins; ENZYME proteins:Hydrolases; Enzymes	Nuclear speckles (Uncertain); Additional: Cytosol				0.0	0.0	0.0	0.0	0.0	0.0	0.0	0.0	0.0	0.0	0.0	0.0	0.0	0.0	0.0	0.0	0.0	0.0	0.0	0.0
DUSP8	1850	symbol	H. sapiens	1850	H. sapiens	DUSP8	dual specificity phosphatase 8	GO:0035970 peptidyl-threonine dephosphorylation;GO:0035335 peptidyl-tyrosine dephosphorylation;GO:0006470 protein dephosphorylation		Predicted intracellular proteins; ENZYME proteins:Hydrolases; Enzymes	Cytosol (Approved)		(M76)PID P38 ALPHA BETA PATHWAY; (M3721)ST JNK MAPK PATHWAY; (M166)PID ATF2 PATHWAY		0.0	0.0	0.0	0.0	0.0	0.0	0.0	0.0	0.0	0.0	0.0	0.0	0.0	0.0	0.0	0.0	0.0	1.0	0.0	0.0
DVL2	1856	symbol	H. sapiens	1856	H. sapiens	DVL2	dishevelled segment polarity protein 2	GO:0014022 neural plate elongation;GO:0022007 convergent extension involved in neural plate elongation;GO:0001839 neural plate morphogenesis		Predicted intracellular proteins	Nucleoplasm (Enhanced); Additional: Nuclear bodies		(M31)PID BETA CATENIN DEG PATHWAY; (M90)PID WNT CANONICAL PATHWAY; (M23)PID WNT NONCANONICAL PATHWAY	(M5895)HALLMARK WNT BETA CATENIN SIGNALING	0.0	1.0	0.0	0.0	0.0	0.0	0.0	0.0	0.0	0.0	1.0	0.0	0.0	0.0	0.0	1.0	0.0	1.0	0.0	0.0
DYRK1B	9149	symbol	H. sapiens	9149	H. sapiens	DYRK1B	dual specificity tyrosine phosphorylation regulated kinase 1B	GO:0060612 adipose tissue development;GO:0007520 myoblast fusion;GO:0000768 syncytium formation by plasma membrane fusion	CMGC Ser/Thr protein kinase family	ENZYME proteins:Transferases; Predicted intracellular proteins; Kinases:CMGC Ser/Thr protein kinases; Enzymes; Disease related genes; Potential drug targets	Nucleoplasm (Supported); Additional: Mitotic chromosome	Fostamatinib			0.0	0.0	0.0	0.0	0.0	0.0	0.0	0.0	0.0	0.0	1.0	0.0	0.0	0.0	0.0	0.0	0.0	0.0	0.0	0.0
EBPL	84650	symbol	H. sapiens	84650	H. sapiens	EBPL	EBP like	GO:0016125 sterol metabolic process;GO:0008202 steroid metabolic process;GO:1901615 organic hydroxy compound metabolic process			Endoplasmic reticulum (Supported)				0.0	0.0	0.0	0.0	0.0	0.0	0.0	0.0	0.0	0.0	0.0	0.0	0.0	0.0	0.0	0.0	0.0	0.0	0.0	0.0
ECE2	9718	symbol	H. sapiens	9718	H. sapiens	ECE2	endothelin converting enzyme 2	GO:0016486 peptide hormone processing;GO:0140448 signaling receptor ligand precursor processing;GO:0042445 hormone metabolic process							0.0	0.0	0.0	0.0	0.0	0.0	0.0	0.0	0.0	0.0	0.0	0.0	0.0	0.0	0.0	0.0	0.0	0.0	0.0	0.0
ECHS1	1892	symbol	H. sapiens	1892	H. sapiens	ECHS1	enoyl-CoA hydratase, short chain 1	GO:0009083 branched-chain amino acid catabolic process;GO:0009081 branched-chain amino acid metabolic process;GO:0006635 fatty acid beta-oxidation		ENZYME proteins:Lyases; Predicted intracellular proteins; Enzymes; Disease related genes; Potential drug targets	Mitochondria (Enhanced)	Hexanoyl-CoA; Octanoyl-Coenzyme A; Acetoacetyl-CoA; 4-(N,N-Dimethylamino)cinnamoyl-CoA; Omega-3-carboxylic acids		(M5935)HALLMARK FATTY ACID METABOLISM; (M5905)HALLMARK ADIPOGENESIS; (M5936)HALLMARK OXIDATIVE PHOSPHORYLATION	1.0	0.0	0.0	0.0	0.0	0.0	0.0	0.0	0.0	0.0	0.0	0.0	0.0	0.0	0.0	0.0	0.0	0.0	0.0	0.0
ECI1	1632	symbol	H. sapiens	1632	H. sapiens	ECI1	enoyl-CoA delta isomerase 1	GO:0006635 fatty acid beta-oxidation;GO:0009062 fatty acid catabolic process;GO:0019395 fatty acid oxidation		Predicted intracellular proteins; ENZYME proteins:Isomerase; Enzymes	Mitochondria (Enhanced)	Octanoyl-Coenzyme A; Benzamidine		(M5935)HALLMARK FATTY ACID METABOLISM; (M5936)HALLMARK OXIDATIVE PHOSPHORYLATION	0.0	0.0	0.0	0.0	0.0	0.0	0.0	0.0	0.0	0.0	0.0	0.0	0.0	0.0	0.0	0.0	0.0	0.0	0.0	0.0
ECSIT	51295	symbol	H. sapiens	51295	H. sapiens	ECSIT	ECSIT signaling integrator	GO:0061635 regulation of protein complex stability;GO:0051341 regulation of oxidoreductase activity;GO:0045087 innate immune response		Predicted intracellular proteins	Nucleoplasm (Supported); Additional: Cytosol			(M5923)HALLMARK PI3K AKT MTOR SIGNALING	0.0	0.0	0.0	0.0	1.0	0.0	0.0	0.0	0.0	0.0	0.0	0.0	0.0	0.0	0.0	0.0	0.0	0.0	1.0	0.0
EDF1	8721	symbol	H. sapiens	8721	H. sapiens	EDF1	endothelial differentiation related factor 1	GO:0043388 positive regulation of DNA binding;GO:0051101 regulation of DNA binding;GO:0045446 endothelial cell differentiation		Predicted intracellular proteins	Cytosol;Nucleoplasm (Supported)			(M5898)HALLMARK DNA REPAIR	0.0	0.0	0.0	0.0	0.0	0.0	0.0	0.0	0.0	0.0	0.0	0.0	0.0	0.0	0.0	0.0	0.0	0.0	0.0	0.0
EEF1D	1936	symbol	H. sapiens	1936	H. sapiens	EEF1D	eukaryotic translation elongation factor 1 delta	GO:0006414 translational elongation;GO:0071479 cellular response to ionizing radiation;GO:0010212 response to ionizing radiation		Predicted intracellular proteins	Nucleoli fibrillar center;Nucleoplasm (Supported)				1.0	0.0	0.0	0.0	0.0	0.0	0.0	0.0	0.0	0.0	0.0	0.0	0.0	0.0	0.0	0.0	0.0	0.0	1.0	0.0
EEF1G	1937	symbol	H. sapiens	1937	H. sapiens	EEF1G	eukaryotic translation elongation factor 1 gamma	GO:0006414 translational elongation;GO:0006749 glutathione metabolic process;GO:0006575 cellular modified amino acid metabolic process		Predicted intracellular proteins	Mitochondria (Approved)				1.0	0.0	0.0	0.0	0.0	0.0	0.0	0.0	0.0	0.0	0.0	0.0	0.0	0.0	0.0	0.0	0.0	1.0	0.0	0.0
EEF2	1938	symbol	H. sapiens	1938	H. sapiens	EEF2	eukaryotic translation elongation factor 2	GO:2000767 positive regulation of cytoplasmic translation;GO:0051593 response to folic acid;GO:1990416 cellular response to brain-derived neurotrophic factor stimulus		Cancer-related genes:Candidate cancer biomarkers; Predicted intracellular proteins; Disease related genes	Cytosol;Plasma membrane (Enhanced)	Adenosine-5-Diphosphoribose; Diphthamide; Guanosine-5'-Diphosphate; N~2~,N~2~-DIMETHYL-N~1~-(6-OXO-5,6-DIHYDROPHENANTHRIDIN-2-YL)GLYCINAMIDE; Esketamine; Moxetumomab Pasudotox	(M121)PID MTOR 4PATHWAY	(M5922)HALLMARK UNFOLDED PROTEIN RESPONSE	1.0	0.0	0.0	0.0	0.0	0.0	0.0	0.0	0.0	0.0	1.0	0.0	0.0	0.0	0.0	0.0	0.0	0.0	0.0	0.0
EGFL7	51162	symbol	H. sapiens	51162	H. sapiens	EGFL7	EGF like domain multiple 7	GO:0045746 negative regulation of Notch signaling pathway;GO:0001570 vasculogenesis;GO:0008593 regulation of Notch signaling pathway		Predicted secreted proteins			(M5883)NABA SECRETED FACTORS; (M5885)NABA MATRISOME ASSOCIATED; (M5889)NABA MATRISOME		0.0	0.0	0.0	0.0	0.0	0.0	0.0	0.0	0.0	0.0	0.0	0.0	0.0	0.0	0.0	0.0	0.0	0.0	0.0	0.0
EGLN2	112398	symbol	H. sapiens	112398	H. sapiens	EGLN2	egl-9 family hypoxia inducible factor 2	GO:0018401 peptidyl-proline hydroxylation to 4-hydroxy-L-proline;GO:0019511 peptidyl-proline hydroxylation;GO:0018126 protein hydroxylation		Predicted intracellular proteins; Enzymes; ENZYME proteins:Oxidoreductases	Nucleoplasm (Supported)	Ascorbic acid; Roxadustat	(M180)PID HIF1A PATHWAY; (M44)PID HIF2PATHWAY; (M3468)NABA ECM REGULATORS	(M5938)HALLMARK REACTIVE OXYGEN SPECIES PATHWAY	1.0	0.0	0.0	0.0	0.0	0.0	0.0	0.0	0.0	0.0	0.0	0.0	0.0	0.0	0.0	0.0	0.0	1.0	1.0	1.0
EGLN3	112399	symbol	H. sapiens	112399	H. sapiens	EGLN3	egl-9 family hypoxia inducible factor 3	GO:0018401 peptidyl-proline hydroxylation to 4-hydroxy-L-proline;GO:0019511 peptidyl-proline hydroxylation;GO:0018126 protein hydroxylation		Predicted intracellular proteins; Enzymes; ENZYME proteins:Oxidoreductases	Cytosol (Supported)	Ascorbic acid; Roxadustat	(M180)PID HIF1A PATHWAY; (M44)PID HIF2PATHWAY; (M255)PID HIF1 TFPATHWAY	(M5924)HALLMARK MTORC1 SIGNALING; (M5937)HALLMARK GLYCOLYSIS	1.0	0.0	0.0	0.0	0.0	0.0	0.0	0.0	0.0	0.0	0.0	0.0	0.0	0.0	0.0	0.0	0.0	1.0	0.0	1.0
EHBP1L1	254102	symbol	H. sapiens	254102	H. sapiens	EHBP1L1	EH domain binding protein 1 like 1	GO:0030036 actin cytoskeleton organization;GO:0030029 actin filament-based process;GO:0007010 cytoskeleton organization		Predicted intracellular proteins					0.0	0.0	0.0	0.0	0.0	0.0	0.0	0.0	0.0	0.0	0.0	0.0	0.0	0.0	0.0	0.0	0.0	0.0	0.0	0.0
EHD1	10938	symbol	H. sapiens	10938	H. sapiens	EHD1	EH domain containing 1	GO:2001137 positive regulation of endocytic recycling;GO:0010886 positive regulation of cholesterol storage;GO:1901741 positive regulation of myoblast fusion		Predicted intracellular proteins	Plasma membrane (Supported)			(M5890)HALLMARK TNFA SIGNALING VIA NFKB; (M5921)HALLMARK COMPLEMENT	0.0	0.0	0.0	0.0	0.0	0.0	0.0	1.0	0.0	0.0	1.0	0.0	0.0	0.0	0.0	0.0	0.0	0.0	0.0	0.0
EID2	163126	symbol	H. sapiens	163126	H. sapiens	EID2	EP300 interacting inhibitor of differentiation 2	GO:0007181 transforming growth factor beta receptor complex assembly;GO:0007183 SMAD protein complex assembly;GO:0030512 negative regulation of transforming growth factor beta receptor signaling pathway		Predicted intracellular proteins	Nucleoplasm (Supported)				0.0	0.0	0.0	0.0	0.0	0.0	0.0	0.0	0.0	0.0	1.0	0.0	0.0	0.0	0.0	0.0	0.0	0.0	0.0	0.0
EIF2S2	8894	symbol	H. sapiens	8894	H. sapiens	EIF2S2	eukaryotic translation initiation factor 2 subunit beta	GO:0002176 male germ cell proliferation;GO:0036093 germ cell proliferation;GO:0001731 formation of translation preinitiation complex		Cancer-related genes:Mutated cancer genes; Predicted intracellular proteins	Endoplasmic reticulum (Supported); Additional: Nucleoli			(M5924)HALLMARK MTORC1 SIGNALING; (M5926)HALLMARK MYC TARGETS V1	1.0	0.0	0.0	0.0	0.0	0.0	0.0	0.0	0.0	1.0	0.0	0.0	0.0	0.0	0.0	0.0	0.0	1.0	0.0	0.0
EIF2S3	1968	symbol	H. sapiens	1968	H. sapiens	EIF2S3	eukaryotic translation initiation factor 2 subunit gamma	GO:0045903 positive regulation of translational fidelity;GO:0001731 formation of translation preinitiation complex;GO:0006450 regulation of translational fidelity		Predicted intracellular proteins; Disease related genes		Guanosine-5'-Diphosphate		(M5941)HALLMARK UV RESPONSE UP	1.0	0.0	0.0	0.0	0.0	0.0	0.0	0.0	0.0	1.0	0.0	0.0	0.0	0.0	0.0	0.0	0.0	1.0	0.0	0.0
EIF3F	8665	symbol	H. sapiens	8665	H. sapiens	EIF3F	eukaryotic translation initiation factor 3 subunit F	GO:0075522 IRES-dependent viral translational initiation;GO:0019081 viral translation;GO:0001732 formation of cytoplasmic translation initiation complex		Predicted intracellular proteins; ENZYME proteins:Hydrolases; Enzymes		Quercetin			1.0	0.0	0.0	0.0	0.0	0.0	0.0	0.0	0.0	1.0	0.0	0.0	1.0	0.0	0.0	0.0	0.0	0.0	0.0	0.0
EIF3G	8666	symbol	H. sapiens	8666	H. sapiens	EIF3G	eukaryotic translation initiation factor 3 subunit G	GO:0075525 viral translational termination-reinitiation;GO:0019081 viral translation;GO:0001732 formation of cytoplasmic translation initiation complex		Predicted intracellular proteins	Cytosol (Enhanced)				1.0	0.0	0.0	0.0	0.0	0.0	0.0	0.0	0.0	1.0	0.0	0.0	0.0	0.0	0.0	0.0	0.0	0.0	0.0	0.0
EIF4B	1975	symbol	H. sapiens	1975	H. sapiens	EIF4B	eukaryotic translation initiation factor 4B	GO:0097010 eukaryotic translation initiation factor 4F complex assembly;GO:0001731 formation of translation preinitiation complex;GO:0002183 cytoplasmic translational initiation		Predicted intracellular proteins	Cytosol (Enhanced)		(M121)PID MTOR 4PATHWAY		1.0	0.0	0.0	0.0	0.0	0.0	0.0	0.0	0.0	1.0	0.0	0.0	0.0	0.0	0.0	0.0	0.0	0.0	0.0	0.0
EIF4EBP1	1978	symbol	H. sapiens	1978	H. sapiens	EIF4EBP1	eukaryotic translation initiation factor 4E binding protein 1	GO:0045947 negative regulation of translational initiation;GO:1990928 response to amino acid starvation;GO:0002931 response to ischemia		Cancer-related genes:Candidate cancer biomarkers; Predicted intracellular proteins	Cytosol;Nucleoplasm (Supported)		(M229)PID P38 ALPHA BETA DOWNSTREAM PATHWAY; (M16)PID INSULIN PATHWAY; (M121)PID MTOR 4PATHWAY	(M5922)HALLMARK UNFOLDED PROTEIN RESPONSE	1.0	0.0	0.0	0.0	0.0	0.0	0.0	0.0	0.0	0.0	0.0	0.0	0.0	0.0	0.0	0.0	0.0	0.0	0.0	0.0
EIF4H	7458	symbol	H. sapiens	7458	H. sapiens	EIF4H	eukaryotic translation initiation factor 4H	GO:0097010 eukaryotic translation initiation factor 4F complex assembly;GO:0001731 formation of translation preinitiation complex;GO:0002183 cytoplasmic translational initiation		Cancer-related genes:Candidate cancer biomarkers; Predicted intracellular proteins; Disease related genes	Cytosol;Nuclear bodies;Nucleoplasm (Approved)			(M5926)HALLMARK MYC TARGETS V1	1.0	0.0	0.0	0.0	0.0	0.0	0.0	0.0	0.0	1.0	0.0	0.0	0.0	0.0	0.0	0.0	0.0	0.0	0.0	0.0
EIF6	3692	symbol	H. sapiens	3692	H. sapiens	EIF6	eukaryotic translation initiation factor 6	GO:1902626 assembly of large subunit precursor of preribosome;GO:0042256 mature ribosome assembly;GO:0000054 ribosomal subunit export from nucleus		Predicted intracellular proteins	Nucleoplasm (Supported)	Copper			1.0	1.0	0.0	0.0	1.0	0.0	1.0	0.0	1.0	1.0	0.0	0.0	0.0	0.0	0.0	0.0	0.0	0.0	0.0	0.0
ELL	8178	symbol	H. sapiens	8178	H. sapiens	ELL	elongation factor for RNA polymerase II	GO:0042796 snRNA transcription by RNA polymerase III;GO:0045945 positive regulation of transcription by RNA polymerase III;GO:0032968 positive regulation of transcription elongation from RNA polymerase II promoter		Predicted intracellular proteins; Disease related genes; Cancer-related genes	Nucleoplasm (Supported); Additional: Cytosol;Nuclear bodies			(M5898)HALLMARK DNA REPAIR	0.0	1.0	0.0	0.0	0.0	0.0	0.0	0.0	0.0	0.0	0.0	0.0	0.0	0.0	0.0	0.0	0.0	1.0	0.0	0.0
ELMSAN1	91748	gene_synonym	H. sapiens	91748	H. sapiens	MIDEAS	mitotic deacetylase associated SANT domain protein	GO:0016575 histone deacetylation;GO:0006476 protein deacetylation;GO:0035601 protein deacylation		Predicted intracellular proteins; Transcription factors:Helix-turn-helix domains	Nucleoplasm (Enhanced)				0.0	0.0	0.0	0.0	0.0	0.0	0.0	0.0	0.0	0.0	0.0	0.0	0.0	0.0	0.0	0.0	0.0	0.0	0.0	0.0
EMC10	284361	symbol	H. sapiens	284361	H. sapiens	EMC10	ER membrane protein complex subunit 10	GO:0045050 protein insertion into ER membrane by stop-transfer membrane-anchor sequence;GO:0071816 tail-anchored membrane protein insertion into ER membrane;GO:0045048 protein insertion into ER membrane		Predicted intracellular proteins; Predicted secreted proteins; Transporters:Primary Active Transporters					0.0	1.0	0.0	0.0	0.0	0.0	0.0	0.0	0.0	0.0	0.0	0.0	0.0	0.0	0.0	0.0	1.0	0.0	0.0	0.0
EMC4	51234	symbol	H. sapiens	51234	H. sapiens	EMC4	ER membrane protein complex subunit 4	GO:0045050 protein insertion into ER membrane by stop-transfer membrane-anchor sequence;GO:0071816 tail-anchored membrane protein insertion into ER membrane;GO:0045048 protein insertion into ER membrane		Predicted intracellular proteins; Transporters:Primary Active Transporters	Focal adhesion sites (Supported)				0.0	0.0	0.0	0.0	0.0	0.0	0.0	0.0	0.0	0.0	0.0	0.0	0.0	0.0	0.0	0.0	0.0	0.0	0.0	0.0
EMC6	83460	symbol	H. sapiens	83460	H. sapiens	EMC6	ER membrane protein complex subunit 6	GO:0045050 protein insertion into ER membrane by stop-transfer membrane-anchor sequence;GO:0071816 tail-anchored membrane protein insertion into ER membrane;GO:0045048 protein insertion into ER membrane		Transporters:Primary Active Transporters	Centrosome (Approved); Additional: Nucleoplasm				0.0	0.0	0.0	0.0	0.0	0.0	0.0	0.0	0.0	0.0	0.0	0.0	0.0	0.0	0.0	0.0	0.0	0.0	0.0	0.0
EMILIN1	11117	symbol	H. sapiens	11117	H. sapiens	EMILIN1	elastin microfibril interfacer 1	GO:1904027 negative regulation of collagen fibril organization;GO:1904026 regulation of collagen fibril organization;GO:0048251 elastic fiber assembly		Predicted intracellular proteins; Predicted secreted proteins			(M3008)NABA ECM GLYCOPROTEINS; (M5884)NABA CORE MATRISOME; (M5889)NABA MATRISOME		0.0	0.0	0.0	0.0	0.0	0.0	0.0	0.0	0.0	0.0	1.0	1.0	0.0	0.0	0.0	0.0	0.0	0.0	0.0	0.0
EML2	24139	symbol	H. sapiens	24139	H. sapiens	EML2	EMAP like 2	GO:0010968 regulation of microtubule nucleation;GO:0031115 negative regulation of microtubule polymerization;GO:0007020 microtubule nucleation		Predicted intracellular proteins	Vesicles (Approved)				0.0	0.0	0.0	0.0	0.0	0.0	0.0	0.0	0.0	0.0	0.0	0.0	0.0	0.0	0.0	0.0	0.0	0.0	0.0	0.0
EML3	256364	symbol	H. sapiens	256364	H. sapiens	EML3	EMAP like 3	GO:1901673 regulation of mitotic spindle assembly;GO:0090169 regulation of spindle assembly;GO:0060236 regulation of mitotic spindle organization		Predicted intracellular proteins					0.0	0.0	0.0	0.0	0.0	0.0	0.0	0.0	0.0	0.0	0.0	0.0	0.0	0.0	0.0	0.0	0.0	0.0	0.0	0.0
EN1	2019	symbol	H. sapiens	2019	H. sapiens	EN1	engrailed homeobox 1	GO:0061743 motor learning;GO:0030917 midbrain-hindbrain boundary development;GO:0042756 drinking behavior		Predicted intracellular proteins; Transcription factors:Helix-turn-helix domains	Nucleoli rim (Approved); Additional: Nucleoplasm				0.0	0.0	0.0	0.0	0.0	0.0	0.0	0.0	0.0	0.0	0.0	0.0	0.0	0.0	0.0	0.0	0.0	0.0	0.0	0.0
ENDOD1	23052	symbol	H. sapiens	23052	H. sapiens	ENDOD1	endonuclease domain containing 1	GO:0090305 nucleic acid phosphodiester bond hydrolysis;GO:0090304 nucleic acid metabolic process;GO:0006139 nucleobase-containing compound metabolic process		Predicted secreted proteins	Nuclear membrane (Approved)			(M5906)HALLMARK ESTROGEN RESPONSE EARLY; (M5945)HALLMARK HEME METABOLISM	0.0	0.0	0.0	0.0	0.0	0.0	0.0	0.0	0.0	0.0	0.0	0.0	0.0	0.0	0.0	0.0	0.0	0.0	0.0	0.0
ENDOV	284131	symbol	H. sapiens	284131	H. sapiens	ENDOV	endonuclease V	GO:0090502 RNA phosphodiester bond hydrolysis, endonucleolytic;GO:0090501 RNA phosphodiester bond hydrolysis;GO:0090305 nucleic acid phosphodiester bond hydrolysis		Predicted intracellular proteins					0.0	0.0	0.0	0.0	0.0	0.0	0.0	0.0	0.0	0.0	0.0	0.0	0.0	0.0	0.0	0.0	0.0	0.0	0.0	0.0
ENSA	2029	symbol	H. sapiens	2029	H. sapiens	ENSA	endosulfine alpha	GO:0035308 negative regulation of protein dephosphorylation;GO:0035305 negative regulation of dephosphorylation;GO:0035304 regulation of protein dephosphorylation		Predicted intracellular proteins	Nucleoli;Nucleoplasm (Approved); Additional: Cytosol;Microtubules				0.0	1.0	0.0	0.0	0.0	0.0	0.0	0.0	0.0	0.0	0.0	0.0	0.0	0.0	0.0	0.0	0.0	0.0	0.0	0.0
EPHA2	1969	symbol	H. sapiens	1969	H. sapiens	EPHA2	EPH receptor A2	GO:0060034 notochord cell differentiation;GO:0060035 notochord cell development;GO:0048320 axial mesoderm formation	Tyr protein kinase family	Cancer-related genes:Candidate cancer biomarkers; ENZYME proteins:Transferases; Kinases:Tyr protein kinases; RAS pathway related proteins; Cancer-related genes:Mutated cancer genes; FDA approved drug targets:Small molecule drugs; Enzymes; Disease related genes	Cell Junctions;Plasma membrane (Supported); Additional: Golgi apparatus;Nuclear speckles	Dasatinib; Phosphoaminophosphonic Acid-Adenylate Ester; Regorafenib; Fostamatinib	(M273)PID EPHA2 FWD PATHWAY; (M177)PID EPHA FWDPATHWAY; (M86)PID ARF6 PATHWAY	(M5934)HALLMARK XENOBIOTIC METABOLISM; (M5939)HALLMARK P53 PATHWAY	1.0	1.0	0.0	0.0	0.0	0.0	1.0	0.0	0.0	0.0	0.0	1.0	1.0	0.0	0.0	0.0	0.0	0.0	0.0	0.0
EPHA5	2044	symbol	H. sapiens	2044	H. sapiens	EPHA5	EPH receptor A5	GO:0032793 positive regulation of CREB transcription factor activity;GO:0048013 ephrin receptor signaling pathway;GO:0019933 cAMP-mediated signaling	Tyr protein kinase family	ENZYME proteins:Transferases; Kinases:Tyr protein kinases; Enzymes		Dasatinib; Fostamatinib	(M177)PID EPHA FWDPATHWAY	(M5956)HALLMARK KRAS SIGNALING DN	1.0	0.0	0.0	0.0	0.0	0.0	0.0	0.0	0.0	0.0	0.0	0.0	0.0	0.0	0.0	0.0	0.0	0.0	0.0	0.0
EPHB4	2050	symbol	H. sapiens	2050	H. sapiens	EPHB4	EPH receptor B4	GO:0048013 ephrin receptor signaling pathway;GO:0002042 cell migration involved in sprouting angiogenesis;GO:0043534 blood vessel endothelial cell migration	Tyr protein kinase family	Cancer-related genes:Candidate cancer biomarkers; ENZYME proteins:Transferases; Kinases:Tyr protein kinases; Predicted intracellular proteins; Enzymes; Disease related genes; Potential drug targets		Dasatinib; N-(5-chloro-1,3-benzodioxol-4-yl)-6-methoxy-7-(3-piperidin-1-ylpropoxy)quinazolin-4-amine; N'-(5-CHLORO-1,3-BENZODIOXOL-4-YL)-N-(3,4,5- TRIMETHOXYPHENYL)PYRIMIDINE-2,4-DIAMINE; N'-(3-CHLORO-4-METHOXY-PHENYL)-N-(3,4,5-TRIMETHOXYPHENYL)-1,3,5-TRIAZINE-2,4-DIAMINE; 3-({4-[(5-chloro-1,3-benzodioxol-4-yl)amino]pyrimidin-2-yl}amino)benzenesulfonamide; N'-(5-chloro-1,3-benzodioxol-4-yl)-N-(3-…	(M257)PID EPHRINB REV PATHWAY; (M62)PID EPHB FWD PATHWAY	(M5916)HALLMARK APICAL SURFACE	1.0	0.0	0.0	0.0	0.0	0.0	0.0	0.0	0.0	0.0	1.0	0.0	0.0	0.0	0.0	0.0	0.0	0.0	0.0	0.0
EPPK1	83481	symbol	H. sapiens	83481	H. sapiens	EPPK1	epiplakin 1	GO:0051548 negative regulation of keratinocyte migration;GO:1905041 regulation of epithelium regeneration;GO:1990399 epithelium regeneration		Predicted intracellular proteins	Intermediate filaments (Enhanced)				0.0	0.0	0.0	0.0	0.0	0.0	0.0	0.0	0.0	0.0	0.0	0.0	0.0	0.0	0.0	0.0	0.0	0.0	0.0	0.0
ERBB3	2065	symbol	H. sapiens	2065	H. sapiens	ERBB3	erb-b2 receptor tyrosine kinase 3	GO:0014037 Schwann cell differentiation;GO:0021545 cranial nerve development;GO:0061098 positive regulation of protein tyrosine kinase activity	Tyr protein kinase family	Cancer-related genes:Candidate cancer biomarkers; ENZYME proteins:Transferases; Kinases:Tyr protein kinases; Cancer-related genes:Mutated cancer genes; Predicted intracellular proteins; Predicted secreted proteins; Enzymes; Disease related genes; Potential drug targets	Plasma membrane (Supported); Additional: Actin filaments	Tucatinib	(M201)PID ERBB NETWORK PATHWAY; (M175)PID ERBB2 ERBB3 PATHWAY; (M239)PID A6B1 A6B4 INTEGRIN PATHWAY	(M5902)HALLMARK APOPTOSIS; (M5909)HALLMARK MYOGENESIS	0.0	0.0	0.0	0.0	0.0	0.0	0.0	0.0	0.0	0.0	1.0	1.0	0.0	0.0	0.0	0.0	0.0	1.0	0.0	0.0
ERCC1	2067	symbol	H. sapiens	2067	H. sapiens	ERCC1	ERCC excision repair 1, endonuclease non-catalytic subunit	GO:0006295 nucleotide-excision repair, DNA incision, 3'-to lesion;GO:0035166 post-embryonic hemopoiesis;GO:0061819 telomeric DNA-containing double minutes formation		Cancer-related genes:Candidate cancer biomarkers; Predicted intracellular proteins; Disease related genes	Nucleoplasm (Enhanced)			(M5949)HALLMARK PEROXISOME; (M5898)HALLMARK DNA REPAIR	0.0	1.0	0.0	0.0	0.0	0.0	0.0	0.0	0.0	0.0	0.0	0.0	0.0	0.0	0.0	0.0	1.0	0.0	0.0	0.0
ERCC2	2068	symbol	H. sapiens	2068	H. sapiens	ERCC2	ERCC excision repair 2, TFIIH core complex helicase subunit	GO:0045951 positive regulation of mitotic recombination;GO:0000717 nucleotide-excision repair, DNA duplex unwinding;GO:0032289 central nervous system myelin formation		Cancer-related genes:Candidate cancer biomarkers; Cancer-related genes:Mutated cancer genes; Predicted intracellular proteins; ENZYME proteins:Hydrolases; Enzymes; Disease related genes; Cancer-related genes:Mutational cancer driver genes; Potential drug targets	Nucleoplasm (Supported); Additional: Cytosol			(M5938)HALLMARK REACTIVE OXYGEN SPECIES PATHWAY; (M5898)HALLMARK DNA REPAIR	1.0	1.0	0.0	0.0	0.0	0.0	1.0	0.0	0.0	1.0	0.0	0.0	0.0	0.0	0.0	0.0	0.0	1.0	0.0	0.0
ERCC5	2073	symbol	H. sapiens	2073	H. sapiens	ERCC5	ERCC excision repair 5, endonuclease	GO:0006295 nucleotide-excision repair, DNA incision, 3'-to lesion;GO:0006296 nucleotide-excision repair, DNA incision, 5'-to lesion;GO:0033683 nucleotide-excision repair, DNA incision		Cancer-related genes:Candidate cancer biomarkers; Predicted intracellular proteins; Disease related genes	Nucleoplasm (Enhanced)			(M5898)HALLMARK DNA REPAIR; (M5939)HALLMARK P53 PATHWAY	0.0	1.0	0.0	0.0	0.0	0.0	0.0	0.0	0.0	0.0	0.0	0.0	0.0	0.0	0.0	0.0	0.0	0.0	0.0	0.0
ERVFRD-1	405754	symbol	H. sapiens	405754	H. sapiens	ERVFRD-1	endogenous retrovirus group FRD member 1, envelope	GO:0007520 myoblast fusion;GO:0000768 syncytium formation by plasma membrane fusion;GO:0140253 cell-cell fusion		Transporters:Transporter channels and pores					0.0	0.0	0.0	0.0	0.0	0.0	0.0	0.0	0.0	0.0	1.0	0.0	0.0	0.0	0.0	0.0	0.0	0.0	0.0	0.0
ESRRA	2101	symbol	H. sapiens	2101	H. sapiens	ESRRA	estrogen related receptor alpha	GO:1900078 positive regulation of cellular response to insulin stimulus;GO:0045670 regulation of osteoclast differentiation;GO:1900076 regulation of cellular response to insulin stimulus		Transcription factors:Zinc-coordinating DNA-binding domains; Nuclear receptors; Predicted intracellular proteins	Microtubules;Nucleoli fibrillar center;Nucleoplasm (Supported); Additional: Cytokinetic bridge	Troglitazone; Diethylstilbestrol; Genistein; Afimoxifene; beta-Naphthoflavone; 1-CYCLOHEXYL-N-{[1-(4-METHYLPHENYL)-1H-INDOL-3-YL]METHYL}METHANAMINE; Flavone		(M5905)HALLMARK ADIPOGENESIS	0.0	0.0	0.0	0.0	0.0	0.0	1.0	0.0	0.0	0.0	0.0	0.0	0.0	0.0	0.0	0.0	0.0	1.0	0.0	0.0
EVA1B	55194	symbol	H. sapiens	55194	H. sapiens	EVA1B	eva-1 homolog B			Predicted intracellular proteins	Cytosol (Approved)				0.0	0.0	0.0	0.0	0.0	0.0	0.0	0.0	0.0	0.0	0.0	0.0	0.0	0.0	0.0	0.0	0.0	0.0	0.0	0.0
EVI5L	115704	symbol	H. sapiens	115704	H. sapiens	EVI5L	ecotropic viral integration site 5 like	GO:1902018 negative regulation of cilium assembly;GO:0120033 negative regulation of plasma membrane bounded cell projection assembly;GO:1902116 negative regulation of organelle assembly		Predicted intracellular proteins	Nuclear bodies (Approved)				0.0	0.0	0.0	0.0	0.0	0.0	0.0	0.0	0.0	0.0	0.0	0.0	0.0	0.0	0.0	0.0	0.0	0.0	0.0	0.0
EVX2	344191	symbol	H. sapiens	344191	H. sapiens	EVX2	even-skipped homeobox 2	GO:0035107 appendage morphogenesis;GO:0035108 limb morphogenesis;GO:0048736 appendage development		Predicted intracellular proteins; Transcription factors:Helix-turn-helix domains					0.0	0.0	0.0	0.0	0.0	0.0	0.0	0.0	0.0	0.0	0.0	0.0	0.0	0.0	0.0	0.0	0.0	0.0	0.0	0.0
EXD3	54932	symbol	H. sapiens	54932	H. sapiens	EXD3	exonuclease 3'-5' domain containing 3	GO:0090305 nucleic acid phosphodiester bond hydrolysis;GO:0090304 nucleic acid metabolic process;GO:0006139 nucleobase-containing compound metabolic process		Predicted intracellular proteins	Focal adhesion sites (Approved); Additional: Actin filaments				0.0	0.0	0.0	0.0	0.0	0.0	0.0	0.0	0.0	0.0	0.0	0.0	0.0	0.0	0.0	0.0	0.0	0.0	0.0	0.0
EXOSC4	54512	symbol	H. sapiens	54512	H. sapiens	EXOSC4	exosome component 4	GO:0071051 polyadenylation-dependent snoRNA 3'-end processing;GO:0034475 U4 snRNA 3'-end processing;GO:0034427 nuclear-transcribed mRNA catabolic process, exonucleolytic, 3'-5'		Predicted intracellular proteins	Cytosol;Nucleoplasm;Vesicles (Approved)			(M5922)HALLMARK UNFOLDED PROTEIN RESPONSE	1.0	0.0	0.0	0.0	0.0	0.0	0.0	0.0	0.0	1.0	0.0	0.0	0.0	0.0	0.0	0.0	0.0	1.0	0.0	0.0
EXOSC6	118460	symbol	H. sapiens	118460	H. sapiens	EXOSC6	exosome component 6	GO:0071051 polyadenylation-dependent snoRNA 3'-end processing;GO:0034475 U4 snRNA 3'-end processing;GO:0034427 nuclear-transcribed mRNA catabolic process, exonucleolytic, 3'-5'		Predicted intracellular proteins					1.0	0.0	0.0	0.0	0.0	0.0	0.0	0.0	0.0	1.0	0.0	0.0	0.0	0.0	0.0	0.0	0.0	1.0	0.0	0.0
F2R	2149	symbol	H. sapiens	2149	H. sapiens	F2R	coagulation factor II thrombin receptor	GO:1900134 negative regulation of renin secretion into blood stream;GO:0007529 establishment of synaptic specificity at neuromuscular junction;GO:0099552 trans-synaptic signaling by lipid, modulating synaptic transmission		Predicted intracellular proteins; FDA approved drug targets:Small molecule drugs; G-protein coupled receptors:GPCRs excl olfactory receptors		Streptokinase; SR-123781A; Vorapaxar; Thrombin	(M238)PID THROMBIN PAR1 PATHWAY	(M5902)HALLMARK APOPTOSIS; (M5939)HALLMARK P53 PATHWAY; (M5950)HALLMARK ALLOGRAFT REJECTION	0.0	0.0	0.0	0.0	0.0	0.0	0.0	0.0	0.0	0.0	0.0	0.0	0.0	0.0	0.0	0.0	0.0	0.0	0.0	1.0
F2RL2	2151	symbol	H. sapiens	2151	H. sapiens	F2RL2	coagulation factor II thrombin receptor like 2	GO:0070493 thrombin-activated receptor signaling pathway;GO:0035025 positive regulation of Rho protein signal transduction;GO:0051482 positive regulation of cytosolic calcium ion concentration involved in phospholipase C-activating G protein-coupled signaling pathway		G-protein coupled receptors:GPCRs excl olfactory receptors			(M138)PID THROMBIN PAR4 PATHWAY; (M15743)ST GA12 PATHWAY; (M193)PID NEPHRIN NEPH1 PATHWAY	(M5946)HALLMARK COAGULATION; (M5947)HALLMARK IL2 STAT5 SIGNALING	0.0	0.0	0.0	0.0	0.0	0.0	0.0	0.0	0.0	0.0	0.0	0.0	0.0	0.0	0.0	0.0	0.0	0.0	0.0	0.0
FAAP100	80233	symbol	H. sapiens	80233	H. sapiens	FAAP100	FA core complex associated protein 100	GO:0036297 interstrand cross-link repair;GO:0006281 DNA repair;GO:0006974 cellular response to DNA damage stimulus		Predicted intracellular proteins	Nucleoplasm (Supported); Additional: Cytosol		(M1)PID FANCONI PATHWAY		0.0	1.0	0.0	0.0	0.0	0.0	0.0	0.0	0.0	0.0	0.0	0.0	0.0	0.0	0.0	0.0	0.0	0.0	0.0	0.0
FADD	8772	symbol	H. sapiens	8772	H. sapiens	FADD	Fas associated via death domain	GO:2000454 positive regulation of CD8-positive, alpha-beta cytotoxic T cell extravasation;GO:0035698 CD8-positive, alpha-beta cytotoxic T cell extravasation;GO:2000409 positive regulation of T cell extravasation		Cancer-related genes:Candidate cancer biomarkers; Predicted intracellular proteins; Disease related genes	Cytosol;Nucleoplasm (Supported)		(M79)PID TRAIL PATHWAY; (M18030)ST TUMOR NECROSIS FACTOR PATHWAY; (M197)PID HIV NEF PATHWAY		0.0	1.0	0.0	0.0	1.0	0.0	1.0	0.0	0.0	0.0	0.0	1.0	1.0	0.0	0.0	0.0	0.0	1.0	1.0	1.0
FADS3	3995	symbol	H. sapiens	3995	H. sapiens	FADS3	fatty acid desaturase 3	GO:0006636 unsaturated fatty acid biosynthetic process;GO:0033559 unsaturated fatty acid metabolic process;GO:0006665 sphingolipid metabolic process		Predicted intracellular proteins	Nucleoli fibrillar center (Approved)				0.0	0.0	0.0	0.0	0.0	0.0	0.0	0.0	0.0	0.0	0.0	0.0	0.0	0.0	0.0	0.0	0.0	0.0	0.0	0.0
FAHD2A	51011	symbol	H. sapiens	51011	H. sapiens	FAHD2A	fumarylacetoacetate hydrolase domain containing 2A			Predicted intracellular proteins					0.0	0.0	0.0	0.0	0.0	0.0	0.0	0.0	0.0	0.0	0.0	0.0	0.0	0.0	0.0	0.0	0.0	0.0	0.0	0.0
FAHD2B	151313	symbol	H. sapiens	151313	H. sapiens	FAHD2B	fumarylacetoacetate hydrolase domain containing 2B			Predicted intracellular proteins					0.0	0.0	0.0	0.0	0.0	0.0	0.0	0.0	0.0	0.0	0.0	0.0	0.0	0.0	0.0	0.0	0.0	0.0	0.0	0.0
FAM133CP	728640	symbol	H. sapiens	728640	H. sapiens	FAM133CP	family with sequence similarity 133, member A pseudogene								0.0	0.0	0.0	0.0	0.0	0.0	0.0	0.0	0.0	0.0	0.0	0.0	0.0	0.0	0.0	0.0	0.0	0.0	0.0	0.0
FAM134C	162427	gene_synonym	H. sapiens	162427	H. sapiens	RETREG3	reticulophagy regulator family member 3	GO:0061709 reticulophagy;GO:0061912 selective autophagy;GO:1903008 organelle disassembly			Nuclear membrane;Nucleoplasm (Approved); Additional: Cytosol				0.0	0.0	0.0	0.0	0.0	0.0	0.0	0.0	0.0	0.0	0.0	0.0	0.0	0.0	0.0	0.0	0.0	0.0	0.0	0.0
FAM150A	389658	gene_synonym	H. sapiens	389658	H. sapiens	ALKAL1	ALK and LTK ligand 1	GO:0070376 regulation of ERK5 cascade;GO:0070378 positive regulation of ERK5 cascade;GO:0070375 ERK5 cascade		Predicted secreted proteins					0.0	0.0	0.0	0.0	0.0	0.0	0.0	0.0	0.0	0.0	0.0	0.0	0.0	0.0	0.0	0.0	0.0	0.0	0.0	0.0
FAM155A-IT1	100874375	gene_synonym	H. sapiens	100874375	H. sapiens	NALF1-IT1	NALF1 intronic transcript 1								0.0	0.0	0.0	0.0	0.0	0.0	0.0	0.0	0.0	0.0	0.0	0.0	0.0	0.0	0.0	0.0	0.0	0.0	0.0	0.0
FAM173A	65990	gene_synonym	H. sapiens	65990	H. sapiens	ANTKMT	adenine nucleotide translocase lysine methyltransferase	GO:1905271 regulation of proton-transporting ATP synthase activity, rotational mechanism;GO:1905273 positive regulation of proton-transporting ATP synthase activity, rotational mechanism;GO:1905706 regulation of mitochondrial ATP synthesis coupled proton transport		Predicted intracellular proteins	Cytosol (Approved)				0.0	0.0	0.0	1.0	1.0	0.0	0.0	0.0	0.0	0.0	0.0	0.0	0.0	0.0	0.0	0.0	0.0	0.0	0.0	0.0
FAM174A	345757	symbol	H. sapiens	345757	H. sapiens	FAM174A	family with sequence similarity 174 member A				Golgi apparatus (Approved); Additional: Cytosol				0.0	0.0	0.0	0.0	0.0	0.0	0.0	0.0	0.0	0.0	0.0	0.0	0.0	0.0	0.0	0.0	0.0	0.0	0.0	0.0
FAM181B	220382	symbol	H. sapiens	220382	H. sapiens	FAM181B	family with sequence similarity 181 member B			Predicted intracellular proteins	Mitochondria (Approved); Additional: Nuclear membrane				0.0	0.0	0.0	0.0	0.0	0.0	0.0	0.0	0.0	0.0	0.0	0.0	0.0	0.0	0.0	0.0	0.0	0.0	0.0	0.0
FAM193B	54540	symbol	H. sapiens	54540	H. sapiens	FAM193B	family with sequence similarity 193 member B			Predicted intracellular proteins	Nucleoli;Nucleoplasm (Enhanced)				0.0	0.0	0.0	0.0	0.0	0.0	0.0	0.0	0.0	0.0	0.0	0.0	0.0	0.0	0.0	0.0	0.0	0.0	0.0	0.0
FAM195A	84331	gene_synonym	H. sapiens	84331	H. sapiens	MCRIP2	MAPK regulated corepressor interacting protein 2			Predicted intracellular proteins					0.0	0.0	0.0	0.0	0.0	0.0	0.0	0.0	0.0	0.0	0.0	0.0	0.0	0.0	0.0	0.0	0.0	0.0	0.0	0.0
FAM212A	389119	gene_synonym	H. sapiens	389119	H. sapiens	INKA1	inka box actin regulator 1	GO:0043086 negative regulation of catalytic activity;GO:0044092 negative regulation of molecular function;GO:0050790 regulation of catalytic activity		Predicted intracellular proteins	Nucleoplasm;Vesicles (Approved)				0.0	0.0	0.0	0.0	0.0	0.0	0.0	0.0	0.0	0.0	0.0	0.0	0.0	0.0	0.0	0.0	0.0	0.0	0.0	0.0
FAM219A	203259	symbol	H. sapiens	203259	H. sapiens	FAM219A	family with sequence similarity 219 member A			Predicted intracellular proteins	Golgi apparatus (Approved); Additional: Nucleoplasm;Vesicles				0.0	0.0	0.0	0.0	0.0	0.0	0.0	0.0	0.0	0.0	0.0	0.0	0.0	0.0	0.0	0.0	0.0	0.0	0.0	0.0
FAM21A	253725	gene_synonym	H. sapiens	253725	H. sapiens	WASHC2C	WASH complex subunit 2C	GO:2000813 negative regulation of barbed-end actin filament capping;GO:2000812 regulation of barbed-end actin filament capping;GO:0030836 positive regulation of actin filament depolymerization		Predicted intracellular proteins	Vesicles (Supported); Additional: Cytosol;Nucleoli				0.0	0.0	0.0	0.0	0.0	0.0	0.0	0.0	0.0	0.0	0.0	0.0	0.0	0.0	0.0	0.0	0.0	0.0	0.0	0.0
FAM21C	253725	gene_synonym	H. sapiens	253725	H. sapiens	WASHC2C	WASH complex subunit 2C	GO:2000813 negative regulation of barbed-end actin filament capping;GO:2000812 regulation of barbed-end actin filament capping;GO:0030836 positive regulation of actin filament depolymerization		Predicted intracellular proteins	Vesicles (Supported); Additional: Cytosol;Nucleoli				0.0	0.0	0.0	0.0	0.0	0.0	0.0	0.0	0.0	0.0	0.0	0.0	0.0	0.0	0.0	0.0	0.0	0.0	0.0	0.0
FAM3A	60343	symbol	H. sapiens	60343	H. sapiens	FAM3A	FAM3 metabolism regulating signaling molecule A	GO:1905035 negative regulation of antifungal innate immune response;GO:0019732 antifungal humoral response;GO:1905034 regulation of antifungal innate immune response		Predicted intracellular proteins; Predicted secreted proteins	Nucleoli rim (Approved); Additional: Mitotic chromosome;Nucleoplasm				0.0	0.0	0.0	0.0	0.0	0.0	0.0	0.0	0.0	0.0	0.0	0.0	0.0	0.0	0.0	0.0	0.0	0.0	0.0	0.0
FAM43A	131583	symbol	H. sapiens	131583	H. sapiens	FAM43A	family with sequence similarity 43 member A			Predicted intracellular proteins	Vesicles (Approved)				0.0	0.0	0.0	0.0	0.0	0.0	0.0	0.0	0.0	0.0	0.0	0.0	0.0	0.0	0.0	0.0	0.0	0.0	0.0	0.0
FAM45A	404636	gene_synonym	H. sapiens	404636	H. sapiens	DENND10	DENN domain containing 10	GO:2000641 regulation of early endosome to late endosome transport;GO:1903649 regulation of cytoplasmic transport;GO:0032509 endosome transport via multivesicular body sorting pathway		Predicted intracellular proteins	Centrosome;Cytosol;Plasma membrane (Approved)				0.0	0.0	0.0	0.0	0.0	0.0	0.0	0.0	0.0	0.0	0.0	0.0	0.0	0.0	0.0	0.0	0.0	0.0	0.0	0.0
FAM46B	115572	gene_synonym	H. sapiens	115572	H. sapiens	TENT5B	terminal nucleotidyltransferase 5B	GO:0048255 mRNA stabilization;GO:1902373 negative regulation of mRNA catabolic process;GO:0043489 RNA stabilization		Predicted secreted proteins					0.0	0.0	0.0	0.0	0.0	0.0	0.0	0.0	0.0	0.0	0.0	0.0	0.0	0.0	0.0	0.0	0.0	0.0	0.0	0.0
FAM50A	9130	symbol	H. sapiens	9130	H. sapiens	FAM50A	family with sequence similarity 50 member A	GO:0043484 regulation of RNA splicing;GO:0008380 RNA splicing;GO:0006397 mRNA processing		Predicted intracellular proteins	Nucleoplasm (Enhanced)				0.0	0.0	0.0	0.0	0.0	0.0	0.0	0.0	0.0	0.0	0.0	0.0	0.0	0.0	0.0	0.0	0.0	0.0	0.0	0.0
FAM50B	26240	symbol	H. sapiens	26240	H. sapiens	FAM50B	family with sequence similarity 50 member B	GO:0006325 chromatin organization;GO:0051276 chromosome organization;GO:0006996 organelle organization		Predicted intracellular proteins	Nucleoplasm (Enhanced); Additional: Cytokinetic bridge;Midbody				0.0	0.0	0.0	0.0	0.0	0.0	0.0	0.0	0.0	0.0	0.0	0.0	0.0	0.0	0.0	0.0	0.0	0.0	0.0	0.0
FAM53A	152877	symbol	H. sapiens	152877	H. sapiens	FAM53A	family with sequence similarity 53 member A	GO:0006606 protein import into nucleus;GO:0051170 import into nucleus;GO:0017038 protein import		Predicted intracellular proteins	Nucleoplasm (Approved); Additional: Actin filaments				0.0	0.0	0.0	1.0	0.0	0.0	0.0	0.0	0.0	0.0	0.0	0.0	0.0	0.0	0.0	0.0	0.0	0.0	0.0	0.0
FAM53B	9679	symbol	H. sapiens	9679	H. sapiens	FAM53B	family with sequence similarity 53 member B	GO:0090263 positive regulation of canonical Wnt signaling pathway;GO:0030177 positive regulation of Wnt signaling pathway;GO:0006606 protein import into nucleus		Predicted intracellular proteins	Cytosol (Approved)				0.0	0.0	0.0	1.0	0.0	0.0	0.0	0.0	0.0	0.0	0.0	0.0	0.0	0.0	0.0	1.0	0.0	0.0	0.0	0.0
FAM58A	92002	gene_synonym	H. sapiens	92002	H. sapiens	CCNQ	cyclin Q	GO:0050790 regulation of catalytic activity;GO:0006357 regulation of transcription by RNA polymerase II;GO:0006366 transcription by RNA polymerase II		Predicted intracellular proteins; Disease related genes	Cytosol;Nucleoplasm (Approved)				0.0	0.0	0.0	0.0	0.0	0.0	0.0	0.0	0.0	0.0	0.0	0.0	0.0	0.0	0.0	0.0	0.0	0.0	0.0	0.0
FAM66B	100128890	symbol	H. sapiens	100128890	H. sapiens	FAM66B	family with sequence similarity 66 member B								0.0	0.0	0.0	0.0	0.0	0.0	0.0	0.0	0.0	0.0	0.0	0.0	0.0	0.0	0.0	0.0	0.0	0.0	0.0	0.0
FAM96B	51647	gene_synonym	H. sapiens	51647	H. sapiens	CIAO2B	cytosolic iron-sulfur assembly component 2B	GO:0106035 protein maturation by [4Fe-4S] cluster transfer;GO:0097428 protein maturation by iron-sulfur cluster transfer;GO:0016226 iron-sulfur cluster assembly		Predicted intracellular proteins	Cytosol;Nucleoplasm (Supported)				0.0	0.0	0.0	0.0	0.0	0.0	0.0	0.0	0.0	0.0	0.0	0.0	0.0	0.0	0.0	0.0	0.0	0.0	0.0	0.0
FAM98C	147965	symbol	H. sapiens	147965	H. sapiens	FAM98C	family with sequence similarity 98 member C			Predicted intracellular proteins	Nucleoli;Nucleoplasm (Approved); Additional: Cytosol				0.0	0.0	0.0	0.0	0.0	0.0	0.0	0.0	0.0	0.0	0.0	0.0	0.0	0.0	0.0	0.0	0.0	0.0	0.0	0.0
FARSA	2193	symbol	H. sapiens	2193	H. sapiens	FARSA	phenylalanyl-tRNA synthetase subunit alpha	GO:0006432 phenylalanyl-tRNA aminoacylation;GO:0051290 protein heterotetramerization;GO:0051291 protein heterooligomerization		Predicted intracellular proteins; Enzymes; ENZYME proteins:Ligase	Cytosol (Approved)	Phenylalanine		(M5928)HALLMARK MYC TARGETS V2	1.0	0.0	0.0	0.0	0.0	0.0	0.0	0.0	0.0	1.0	0.0	0.0	0.0	0.0	0.0	0.0	0.0	0.0	0.0	0.0
FASN	2194	symbol	H. sapiens	2194	H. sapiens	FASN	fatty acid synthase	GO:0030223 neutrophil differentiation;GO:0008611 ether lipid biosynthetic process;GO:0046504 glycerol ether biosynthetic process		Cancer-related genes:Candidate cancer biomarkers; ENZYME proteins:Transferases; ENZYME proteins:Lyases; Predicted intracellular proteins; FDA approved drug targets:Small molecule drugs; ENZYME proteins:Hydrolases; ENZYME proteins:Oxidoreductases; Enzymes	Cytosol;Plasma membrane (Enhanced)	Cerulenin; Orlistat	(M236)PID DELTA NP63 PATHWAY; (M19)PID P73PATHWAY	(M5892)HALLMARK CHOLESTEROL HOMEOSTASIS; (M5935)HALLMARK FATTY ACID METABOLISM; (M5906)HALLMARK ESTROGEN RESPONSE EARLY	0.0	1.0	0.0	0.0	1.0	0.0	1.0	0.0	0.0	0.0	0.0	0.0	0.0	0.0	0.0	0.0	0.0	0.0	1.0	0.0
FAU	2197	symbol	H. sapiens	2197	H. sapiens	FAU	FAU ubiquitin like and ribosomal protein S30 fusion	GO:0008150 biological_process		Predicted intracellular proteins; Ribosomal proteins	Cytosol;Endoplasmic reticulum (Enhanced); Additional: Nucleoli				1.0	0.0	0.0	0.0	0.0	0.0	0.0	0.0	0.0	0.0	0.0	0.0	0.0	0.0	0.0	0.0	0.0	0.0	0.0	0.0
FBLIM1	54751	symbol	H. sapiens	54751	H. sapiens	FBLIM1	filamin binding LIM protein 1	GO:0033623 regulation of integrin activation;GO:0033622 integrin activation;GO:0008360 regulation of cell shape		Predicted intracellular proteins	Cell Junctions;Focal adhesion sites (Enhanced); Additional: Nucleoli fibrillar center				0.0	0.0	0.0	0.0	0.0	0.0	0.0	0.0	0.0	0.0	0.0	0.0	0.0	0.0	0.0	0.0	0.0	0.0	0.0	0.0
FBRSL1	57666	symbol	H. sapiens	57666	H. sapiens	FBRSL1	fibrosin like 1			Predicted intracellular proteins	Cytosol;Nucleoplasm (Approved); Additional: Plasma membrane				0.0	0.0	0.0	0.0	0.0	0.0	0.0	0.0	0.0	0.0	0.0	0.0	0.0	0.0	0.0	0.0	0.0	0.0	0.0	0.0
FBXL12	54850	symbol	H. sapiens	54850	H. sapiens	FBXL12	F-box and leucine rich repeat protein 12	GO:0043153 entrainment of circadian clock by photoperiod;GO:0009648 photoperiodism;GO:0009649 entrainment of circadian clock		Predicted intracellular proteins	Mitochondria (Approved)				0.0	0.0	0.0	0.0	0.0	0.0	0.0	0.0	0.0	0.0	0.0	0.0	0.0	1.0	0.0	0.0	0.0	0.0	0.0	0.0
FBXL14	144699	symbol	H. sapiens	144699	H. sapiens	FBXL14	F-box and leucine rich repeat protein 14	GO:0031146 SCF-dependent proteasomal ubiquitin-dependent protein catabolic process;GO:0043161 proteasome-mediated ubiquitin-dependent protein catabolic process;GO:0010498 proteasomal protein catabolic process		Predicted intracellular proteins	Golgi apparatus;Nucleoplasm (Approved); Additional: Cytosol				0.0	0.0	0.0	0.0	0.0	0.0	0.0	0.0	0.0	0.0	0.0	0.0	0.0	1.0	0.0	0.0	0.0	0.0	0.0	0.0
FBXL15	79176	symbol	H. sapiens	79176	H. sapiens	FBXL15	F-box and leucine rich repeat protein 15	GO:0030513 positive regulation of BMP signaling pathway;GO:0031146 SCF-dependent proteasomal ubiquitin-dependent protein catabolic process;GO:0009953 dorsal/ventral pattern formation		Predicted intracellular proteins					0.0	0.0	0.0	0.0	0.0	0.0	0.0	0.0	0.0	0.0	0.0	0.0	0.0	1.0	0.0	0.0	0.0	0.0	0.0	0.0
FBXL18	80028	symbol	H. sapiens	80028	H. sapiens	FBXL18	F-box and leucine rich repeat protein 18	GO:0031146 SCF-dependent proteasomal ubiquitin-dependent protein catabolic process;GO:0043161 proteasome-mediated ubiquitin-dependent protein catabolic process;GO:0010498 proteasomal protein catabolic process		Predicted intracellular proteins	Cytosol;Nucleoplasm (Approved)				0.0	0.0	0.0	0.0	0.0	0.0	0.0	0.0	0.0	0.0	0.0	0.0	0.0	1.0	0.0	0.0	0.0	0.0	0.0	0.0
FBXL19	54620	symbol	H. sapiens	54620	H. sapiens	FBXL19	F-box and leucine rich repeat protein 19	GO:0016577 histone demethylation;GO:0006482 protein demethylation;GO:0008214 protein dealkylation		Predicted intracellular proteins	Nucleoplasm (Approved)				0.0	0.0	0.0	0.0	0.0	0.0	0.0	0.0	0.0	0.0	0.0	0.0	0.0	1.0	0.0	0.0	0.0	0.0	0.0	0.0
FBXL8	55336	symbol	H. sapiens	55336	H. sapiens	FBXL8	F-box and leucine rich repeat protein 8	GO:0043153 entrainment of circadian clock by photoperiod;GO:0009648 photoperiodism;GO:0009649 entrainment of circadian clock		Predicted intracellular proteins	Golgi apparatus (Approved)				0.0	0.0	0.0	0.0	0.0	0.0	0.0	0.0	0.0	0.0	0.0	0.0	0.0	1.0	0.0	0.0	0.0	0.0	0.0	0.0
FBXO44	93611	symbol	H. sapiens	93611	H. sapiens	FBXO44	F-box protein 44	GO:0006516 glycoprotein catabolic process;GO:0031146 SCF-dependent proteasomal ubiquitin-dependent protein catabolic process;GO:0030433 ubiquitin-dependent ERAD pathway		Predicted intracellular proteins	Nucleoplasm (Approved)				0.0	0.0	0.0	0.0	0.0	0.0	0.0	0.0	0.0	0.0	0.0	0.0	0.0	1.0	0.0	0.0	0.0	0.0	0.0	0.0
FBXO46	23403	symbol	H. sapiens	23403	H. sapiens	FBXO46	F-box protein 46			Predicted intracellular proteins	Nucleoplasm;Vesicles (Approved); Additional: Cytosol				0.0	0.0	0.0	0.0	0.0	0.0	0.0	0.0	0.0	0.0	0.0	0.0	0.0	0.0	0.0	0.0	0.0	0.0	0.0	0.0
FDX1L	112812	gene_synonym	H. sapiens	112812	H. sapiens	FDX2	ferredoxin 2	GO:0022900 electron transport chain;GO:0006091 generation of precursor metabolites and energy;GO:0044237 cellular metabolic process		Predicted intracellular proteins					0.0	0.0	0.0	0.0	1.0	0.0	0.0	0.0	0.0	0.0	0.0	0.0	0.0	0.0	0.0	0.0	0.0	0.0	0.0	0.0
FDXR	2232	symbol	H. sapiens	2232	H. sapiens	FDXR	ferredoxin reductase	GO:0006744 ubiquinone biosynthetic process;GO:1901663 quinone biosynthetic process;GO:0006743 ubiquinone metabolic process		Predicted intracellular proteins; Enzymes; ENZYME proteins:Oxidoreductases; Disease related genes; Potential drug targets	Mitochondria (Enhanced)	Flavin adenine dinucleotide; Nicotinamide adenine dinucleotide phosphate	(M256)PID TAP63 PATHWAY; (M145)PID P53 DOWNSTREAM PATHWAY	(M5948)HALLMARK BILE ACID METABOLISM; (M5902)HALLMARK APOPTOSIS; (M5924)HALLMARK MTORC1 SIGNALING	0.0	0.0	0.0	0.0	1.0	0.0	0.0	0.0	0.0	0.0	0.0	0.0	0.0	0.0	0.0	0.0	0.0	0.0	0.0	0.0
FEM1A	55527	symbol	H. sapiens	55527	H. sapiens	FEM1A	fem-1 homolog A	GO:0140627 ubiquitin-dependent protein catabolic process via the C-end degron rule pathway;GO:0051438 regulation of ubiquitin-protein transferase activity;GO:0050729 positive regulation of inflammatory response		Predicted intracellular proteins	Golgi apparatus;Nucleoplasm (Supported); Additional: Cytosol				0.0	0.0	0.0	0.0	0.0	0.0	0.0	0.0	0.0	0.0	0.0	0.0	0.0	1.0	0.0	0.0	0.0	0.0	0.0	0.0
FERMT3	83706	symbol	H. sapiens	83706	H. sapiens	FERMT3	FERM domain containing kindlin 3	GO:0033632 regulation of cell-cell adhesion mediated by integrin;GO:0033631 cell-cell adhesion mediated by integrin;GO:0033622 integrin activation		Predicted intracellular proteins; Disease related genes	Vesicles (Approved)				0.0	0.0	0.0	0.0	0.0	0.0	0.0	0.0	0.0	0.0	0.0	0.0	0.0	0.0	0.0	0.0	0.0	0.0	0.0	0.0
FEZF2	55079	symbol	H. sapiens	55079	H. sapiens	FEZF2	FEZ family zinc finger 2	GO:0021797 forebrain anterior/posterior pattern specification;GO:0021853 cerebral cortex GABAergic interneuron migration;GO:0021902 commitment of neuronal cell to specific neuron type in forebrain		Transcription factors:Zinc-coordinating DNA-binding domains; Predicted intracellular proteins					0.0	0.0	0.0	0.0	0.0	0.0	1.0	0.0	0.0	0.0	0.0	0.0	0.0	0.0	0.0	0.0	0.0	0.0	0.0	0.0
FGFBP3	143282	symbol	H. sapiens	143282	H. sapiens	FGFBP3	fibroblast growth factor binding protein 3	GO:0045743 positive regulation of fibroblast growth factor receptor signaling pathway;GO:0043117 positive regulation of vascular permeability;GO:0040036 regulation of fibroblast growth factor receptor signaling pathway		Predicted secreted proteins			(M5883)NABA SECRETED FACTORS; (M5885)NABA MATRISOME ASSOCIATED; (M5889)NABA MATRISOME		0.0	0.0	0.0	0.0	0.0	0.0	0.0	0.0	0.0	0.0	0.0	0.0	0.0	0.0	0.0	0.0	0.0	0.0	0.0	0.0
FGL2	10875	symbol	H. sapiens	10875	H. sapiens	FGL2	fibrinogen like 2	GO:0002472 macrophage antigen processing and presentation;GO:0002616 regulation of macrophage antigen processing and presentation;GO:0002617 negative regulation of macrophage antigen processing and presentation		Predicted secreted proteins			(M3008)NABA ECM GLYCOPROTEINS; (M5884)NABA CORE MATRISOME; (M5889)NABA MATRISOME	(M5947)HALLMARK IL2 STAT5 SIGNALING; (M5913)HALLMARK INTERFERON GAMMA RESPONSE; (M5924)HALLMARK MTORC1 SIGNALING	0.0	0.0	0.0	0.0	0.0	0.0	1.0	0.0	0.0	0.0	0.0	0.0	0.0	0.0	0.0	0.0	0.0	0.0	0.0	0.0
FHOD1	29109	symbol	H. sapiens	29109	H. sapiens	FHOD1	formin homology 2 domain containing 1	GO:0051660 establishment of centrosome localization;GO:0051639 actin filament network formation;GO:0007097 nuclear migration		Predicted intracellular proteins	Cytosol (Supported)				0.0	0.0	0.0	0.0	0.0	0.0	0.0	0.0	0.0	0.0	0.0	0.0	1.0	0.0	0.0	0.0	0.0	0.0	0.0	0.0
FIBP	9158	symbol	H. sapiens	9158	H. sapiens	FIBP	FGF1 intracellular binding protein	GO:0070527 platelet aggregation;GO:0008543 fibroblast growth factor receptor signaling pathway;GO:0034109 homotypic cell-cell adhesion		Predicted intracellular proteins; Disease related genes	Nuclear speckles (Supported)				0.0	0.0	0.0	0.0	0.0	0.0	0.0	0.0	0.0	0.0	0.0	0.0	0.0	0.0	0.0	0.0	0.0	0.0	0.0	0.0
FICD	11153	symbol	H. sapiens	11153	H. sapiens	FICD	FIC domain protein adenylyltransferase	GO:0044601 protein denucleotidylation;GO:0044602 protein deadenylylation;GO:0018117 protein adenylylation		ENZYME proteins:Transferases; Predicted intracellular proteins; Enzymes	Nucleoplasm (Approved)				0.0	0.0	0.0	0.0	0.0	0.0	0.0	0.0	0.0	0.0	0.0	0.0	0.0	0.0	0.0	0.0	1.0	0.0	0.0	0.0
FIS1	51024	symbol	H. sapiens	51024	H. sapiens	FIS1	fission, mitochondrial 1	GO:1904578 response to thapsigargin;GO:1904579 cellular response to thapsigargin;GO:1905395 response to flavonoid		Predicted intracellular proteins	Mitochondria (Supported)			(M5949)HALLMARK PEROXISOME	0.0	0.0	0.0	1.0	1.0	0.0	0.0	0.0	0.0	0.0	0.0	1.0	0.0	0.0	0.0	0.0	0.0	0.0	0.0	1.0
FITM2	128486	symbol	H. sapiens	128486	H. sapiens	FITM2	fat storage inducing transmembrane protein 2	GO:0036115 fatty-acyl-CoA catabolic process;GO:0035356 cellular triglyceride homeostasis;GO:0033869 nucleoside bisphosphate catabolic process							0.0	0.0	0.0	0.0	0.0	0.0	0.0	0.0	0.0	0.0	0.0	0.0	0.0	0.0	0.0	0.0	0.0	0.0	0.0	0.0
FJX1	24147	symbol	H. sapiens	24147	H. sapiens	FJX1	four-jointed box kinase 1	GO:0010842 retina layer formation;GO:0060042 retina morphogenesis in camera-type eye;GO:0003407 neural retina development		Predicted intracellular proteins	Vesicles (Approved)			(M5890)HALLMARK TNFA SIGNALING VIA NFKB	0.0	0.0	0.0	0.0	0.0	0.0	0.0	0.0	0.0	0.0	0.0	0.0	1.0	0.0	0.0	0.0	0.0	0.0	0.0	0.0
FKBP2	2286	symbol	H. sapiens	2286	H. sapiens	FKBP2	FKBP prolyl isomerase 2	GO:0000413 protein peptidyl-prolyl isomerization;GO:0018208 peptidyl-proline modification;GO:0061077 chaperone-mediated protein folding		Predicted intracellular proteins; ENZYME proteins:Isomerase; Enzymes	Plasma membrane (Approved)			(M5924)HALLMARK MTORC1 SIGNALING	0.0	0.0	0.0	0.0	0.0	0.0	0.0	0.0	0.0	0.0	0.0	0.0	0.0	0.0	0.0	0.0	0.0	0.0	0.0	0.0
FKRP	79147	symbol	H. sapiens	79147	H. sapiens	FKRP	fukutin related protein	GO:0035269 protein O-linked mannosylation;GO:0035268 protein mannosylation;GO:0097502 mannosylation		Predicted intracellular proteins; Disease related genes	Cytosol;Golgi apparatus;Nucleoplasm (Approved)				0.0	0.0	0.0	0.0	0.0	0.0	0.0	0.0	0.0	0.0	0.0	0.0	0.0	0.0	0.0	0.0	0.0	0.0	0.0	0.0
FLJ16779	100192386	symbol	H. sapiens	100192386	H. sapiens	FLJ16779	uncharacterized LOC100192386								0.0	0.0	0.0	0.0	0.0	0.0	0.0	0.0	0.0	0.0	0.0	0.0	0.0	0.0	0.0	0.0	0.0	0.0	0.0	0.0
FLJ20021	90024	symbol	H. sapiens	90024	H. sapiens	FLJ20021	uncharacterized LOC90024								0.0	0.0	0.0	0.0	0.0	0.0	0.0	0.0	0.0	0.0	0.0	0.0	0.0	0.0	0.0	0.0	0.0	0.0	0.0	0.0
FLJ23867						None	None	None	None	None	None	None	None	None	nan	nan	nan	nan	nan	nan	nan	nan	nan	nan	nan	nan	nan	nan	nan	nan	nan	nan	nan	nan
FLJ37453	729614	symbol	H. sapiens	729614	H. sapiens	FLJ37453	uncharacterized LOC729614								0.0	0.0	0.0	0.0	0.0	0.0	0.0	0.0	0.0	0.0	0.0	0.0	0.0	0.0	0.0	0.0	0.0	0.0	0.0	0.0
FLJ42393	401105	symbol	H. sapiens	401105	H. sapiens	FLJ42393	uncharacterized LOC401105								0.0	0.0	0.0	0.0	0.0	0.0	0.0	0.0	0.0	0.0	0.0	0.0	0.0	0.0	0.0	0.0	0.0	0.0	0.0	0.0
FLNA	2316	symbol	H. sapiens	2316	H. sapiens	FLNA	filamin A	GO:1905000 regulation of membrane repolarization during atrial cardiac muscle cell action potential;GO:0021943 formation of radial glial scaffolds;GO:0097368 establishment of Sertoli cell barrier		Predicted intracellular proteins; Potential drug targets; Disease related genes; Transporters:Accessory Factors Involved in Transport	Actin filaments;Cytosol;Plasma membrane (Enhanced)	Artenimol	(M23)PID WNT NONCANONICAL PATHWAY; (M16801)SIG REGULATION OF THE ACTIN CYTOSKELETON BY RHO GTPASES; (M34)PID TCR PATHWAY	(M5893)HALLMARK MITOTIC SPINDLE; (M5930)HALLMARK EPITHELIAL MESENCHYMAL TRANSITION; (M5950)HALLMARK ALLOGRAFT REJECTION	0.0	1.0	0.0	1.0	0.0	0.0	0.0	0.0	0.0	0.0	1.0	0.0	0.0	0.0	0.0	0.0	1.0	0.0	0.0	1.0
FLOT2	2319	symbol	H. sapiens	2319	H. sapiens	FLOT2	flotillin 2	GO:1903905 positive regulation of establishment of T cell polarity;GO:0044860 protein localization to plasma membrane raft;GO:1903903 regulation of establishment of T cell polarity		Predicted intracellular proteins	Plasma membrane (Supported); Additional: Vesicles		(M1315)SIG PIP3 SIGNALING IN B LYMPHOCYTES; (M8626)SIG BCR SIGNALING PATHWAY; (M7955)SIG INSULIN RECEPTOR PATHWAY IN CARDIAC MYOCYTES	(M5916)HALLMARK APICAL SURFACE	0.0	1.0	0.0	0.0	0.0	0.0	0.0	0.0	0.0	0.0	1.0	0.0	0.0	0.0	0.0	0.0	0.0	1.0	0.0	0.0
FLYWCH1	84256	symbol	H. sapiens	84256	H. sapiens	FLYWCH1	FLYWCH-type zinc finger 1			Predicted intracellular proteins	Nuclear bodies (Enhanced); Additional: Cytosol;Nucleoplasm				0.0	0.0	0.0	0.0	0.0	0.0	0.0	0.0	0.0	0.0	0.0	0.0	0.0	0.0	0.0	0.0	0.0	0.0	0.0	0.0
FLYWCH2	114984	symbol	H. sapiens	114984	H. sapiens	FLYWCH2	FLYWCH family member 2	GO:0008150 biological_process		Predicted intracellular proteins	Nucleoplasm (Approved)				0.0	0.0	0.0	0.0	0.0	0.0	0.0	0.0	0.0	0.0	0.0	0.0	0.0	0.0	0.0	0.0	0.0	0.0	0.0	0.0
FN3K	64122	symbol	H. sapiens	64122	H. sapiens	FN3K	fructosamine 3 kinase	GO:0030393 fructoselysine metabolic process;GO:0036525 protein deglycation;GO:0030389 fructosamine metabolic process		Predicted intracellular proteins	Mitochondria (Approved)			(M5945)HALLMARK HEME METABOLISM	0.0	0.0	0.0	0.0	0.0	0.0	0.0	0.0	0.0	0.0	0.0	0.0	0.0	0.0	0.0	0.0	0.0	0.0	0.0	0.0
FOSB	2354	symbol	H. sapiens	2354	H. sapiens	FOSB	FosB proto-oncogene, AP-1 transcription factor subunit	GO:0051412 response to corticosterone;GO:0014072 response to isoquinoline alkaloid;GO:0043278 response to morphine		Predicted intracellular proteins; Transcription factors:Basic domains	Nucleoplasm (Supported); Additional: Vesicles		(M167)PID AP1 PATHWAY	(M5941)HALLMARK UV RESPONSE UP; (M5890)HALLMARK TNFA SIGNALING VIA NFKB	0.0	1.0	0.0	0.0	0.0	0.0	0.0	0.0	0.0	0.0	0.0	0.0	0.0	0.0	0.0	0.0	0.0	0.0	1.0	0.0
FOSL2	2355	symbol	H. sapiens	2355	H. sapiens	FOSL2	FOS like 2, AP-1 transcription factor subunit	GO:0003334 keratinocyte development;GO:0048146 positive regulation of fibroblast proliferation;GO:0048145 regulation of fibroblast proliferation		Predicted intracellular proteins; Transcription factors:Basic domains	Nucleoplasm (Enhanced)		(M65)PID FRA PATHWAY; (M236)PID DELTA NP63 PATHWAY; (M167)PID AP1 PATHWAY	(M5890)HALLMARK TNFA SIGNALING VIA NFKB; (M5891)HALLMARK HYPOXIA	0.0	0.0	0.0	0.0	0.0	0.0	0.0	0.0	0.0	0.0	0.0	0.0	0.0	0.0	0.0	0.0	0.0	0.0	0.0	0.0
FOXC2	2303	symbol	H. sapiens	2303	H. sapiens	FOXC2	forkhead box C2	GO:1902257 negative regulation of apoptotic process involved in outflow tract morphogenesis;GO:0048342 paraxial mesodermal cell differentiation;GO:0048343 paraxial mesodermal cell fate commitment		Predicted intracellular proteins; Disease related genes; Transcription factors:Helix-turn-helix domains	Nuclear bodies;Nucleoplasm (Supported)			(M5930)HALLMARK EPITHELIAL MESENCHYMAL TRANSITION	0.0	1.0	0.0	0.0	0.0	0.0	0.0	0.0	0.0	0.0	1.0	0.0	0.0	0.0	0.0	0.0	0.0	0.0	0.0	0.0
FOXC2-AS1	103752587	symbol	H. sapiens	103752587	H. sapiens	FOXC2-AS1	FOXC2 antisense RNA 1								0.0	0.0	0.0	0.0	0.0	0.0	0.0	0.0	0.0	0.0	0.0	0.0	0.0	0.0	0.0	0.0	0.0	0.0	0.0	0.0
FOXD2	2306	symbol	H. sapiens	2306	H. sapiens	FOXD2	forkhead box D2	GO:0045944 positive regulation of transcription by RNA polymerase II;GO:0045893 positive regulation of transcription, DNA-templated;GO:1903508 positive regulation of nucleic acid-templated transcription		Predicted intracellular proteins; Transcription factors:Helix-turn-helix domains					0.0	0.0	0.0	0.0	0.0	0.0	0.0	0.0	0.0	0.0	0.0	0.0	0.0	0.0	0.0	0.0	0.0	0.0	0.0	0.0
FOXE1	2304	symbol	H. sapiens	2304	H. sapiens	FOXE1	forkhead box E1	GO:0060465 pharynx development;GO:0060023 soft palate development;GO:0060022 hard palate development		Predicted intracellular proteins; Disease related genes; Transcription factors:Helix-turn-helix domains					0.0	0.0	0.0	0.0	0.0	0.0	0.0	0.0	0.0	0.0	0.0	0.0	0.0	0.0	0.0	0.0	0.0	0.0	0.0	0.0
FOXE3	2301	symbol	H. sapiens	2301	H. sapiens	FOXE3	forkhead box E3	GO:0002930 trabecular meshwork development;GO:0097166 lens epithelial cell proliferation;GO:2001109 regulation of lens epithelial cell proliferation		Predicted intracellular proteins; Disease related genes; Transcription factors:Helix-turn-helix domains					0.0	0.0	0.0	0.0	0.0	0.0	1.0	0.0	0.0	0.0	0.0	0.0	0.0	0.0	0.0	0.0	0.0	0.0	0.0	0.0
FOXI3	344167	symbol	H. sapiens	344167	H. sapiens	FOXI3	forkhead box I3	GO:0006357 regulation of transcription by RNA polymerase II;GO:0006366 transcription by RNA polymerase II;GO:0009653 anatomical structure morphogenesis		Predicted intracellular proteins; Transcription factors:Helix-turn-helix domains					0.0	0.0	0.0	0.0	0.0	0.0	0.0	0.0	0.0	0.0	0.0	0.0	0.0	0.0	0.0	0.0	0.0	0.0	0.0	0.0
FOXK1	221937	symbol	H. sapiens	221937	H. sapiens	FOXK1	forkhead box K1	GO:0006735 NADH regeneration;GO:0061621 canonical glycolysis;GO:0061718 glucose catabolic process to pyruvate		Predicted intracellular proteins; Transcription factors:Helix-turn-helix domains	Nucleoplasm (Supported); Additional: Nucleoli fibrillar center				0.0	0.0	1.0	0.0	1.0	0.0	0.0	0.0	0.0	0.0	1.0	0.0	0.0	0.0	0.0	0.0	0.0	0.0	0.0	0.0
FOXL1	2300	symbol	H. sapiens	2300	H. sapiens	FOXL1	forkhead box L1	GO:0007495 visceral mesoderm-endoderm interaction involved in midgut development;GO:0061146 Peyer's patch morphogenesis;GO:0048537 mucosa-associated lymphoid tissue development		Predicted intracellular proteins; Transcription factors:Helix-turn-helix domains					0.0	0.0	0.0	0.0	0.0	0.0	0.0	0.0	0.0	0.0	1.0	0.0	0.0	0.0	0.0	1.0	0.0	0.0	0.0	0.0
FOXP1	27086	symbol	H. sapiens	27086	H. sapiens	FOXP1	forkhead box P1	GO:0032745 positive regulation of interleukin-21 production;GO:0061470 T follicular helper cell differentiation;GO:0036301 macrophage colony-stimulating factor production		Predicted intracellular proteins; Disease related genes; Cancer-related genes; Transcription factors:Helix-turn-helix domains	Nucleoplasm (Enhanced)				0.0	0.0	0.0	0.0	0.0	0.0	1.0	0.0	0.0	0.0	0.0	0.0	0.0	0.0	0.0	0.0	0.0	0.0	0.0	0.0
FOXS1	2307	symbol	H. sapiens	2307	H. sapiens	FOXS1	forkhead box S1	GO:0040018 positive regulation of multicellular organism growth;GO:0050885 neuromuscular process controlling balance;GO:0040014 regulation of multicellular organism growth		Predicted intracellular proteins; Transcription factors:Helix-turn-helix domains	Cytosol;Nucleoplasm (Approved)				0.0	0.0	0.0	0.0	0.0	0.0	0.0	0.0	0.0	0.0	0.0	0.0	0.0	0.0	0.0	0.0	0.0	0.0	0.0	0.0
FPGS	2356	symbol	H. sapiens	2356	H. sapiens	FPGS	folylpolyglutamate synthase	GO:0046901 tetrahydrofolylpolyglutamate biosynthetic process;GO:0046900 tetrahydrofolylpolyglutamate metabolic process;GO:0009396 folic acid-containing compound biosynthetic process		Predicted intracellular proteins; Enzymes; ENZYME proteins:Ligase		Glutamic acid; Raltitrexed			0.0	0.0	0.0	0.0	0.0	0.0	0.0	0.0	0.0	0.0	0.0	0.0	0.0	0.0	0.0	0.0	0.0	0.0	0.0	0.0
FRMD6-AS1	145438	symbol	H. sapiens	145438	H. sapiens	FRMD6-AS1	FRMD6 antisense RNA 1								0.0	0.0	0.0	0.0	0.0	0.0	0.0	0.0	0.0	0.0	0.0	0.0	0.0	0.0	0.0	0.0	0.0	0.0	0.0	0.0
FSCN2	25794	symbol	H. sapiens	25794	H. sapiens	FSCN2	fascin actin-bundling protein 2, retinal	GO:0042462 eye photoreceptor cell development;GO:0001754 eye photoreceptor cell differentiation;GO:0042461 photoreceptor cell development		Predicted intracellular proteins; Disease related genes			(M16801)SIG REGULATION OF THE ACTIN CYTOSKELETON BY RHO GTPASES		0.0	0.0	0.0	0.0	0.0	0.0	0.0	0.0	0.0	0.0	0.0	0.0	0.0	0.0	0.0	0.0	0.0	0.0	0.0	0.0
FSTL3	10272	symbol	H. sapiens	10272	H. sapiens	FSTL3	follistatin like 3	GO:0032926 negative regulation of activin receptor signaling pathway;GO:0030325 adrenal gland development;GO:0032925 regulation of activin receptor signaling pathway		Predicted intracellular proteins; Disease related genes; Predicted secreted proteins; Cancer-related genes	Nucleoplasm (Supported)		(M5883)NABA SECRETED FACTORS; (M5885)NABA MATRISOME ASSOCIATED; (M5889)NABA MATRISOME	(M5930)HALLMARK EPITHELIAL MESENCHYMAL TRANSITION	0.0	1.0	0.0	0.0	0.0	0.0	1.0	0.0	0.0	0.0	0.0	0.0	0.0	0.0	0.0	0.0	0.0	0.0	0.0	0.0
FUK	197258	gene_synonym	H. sapiens	197258	H. sapiens	FCSK	fucose kinase	GO:0042352 GDP-L-fucose salvage;GO:0042350 GDP-L-fucose biosynthetic process;GO:0046368 GDP-L-fucose metabolic process		ENZYME proteins:Transferases; Predicted intracellular proteins; Enzymes	Vesicles (Approved)				0.0	0.0	0.0	0.0	0.0	0.0	0.0	0.0	0.0	0.0	0.0	0.0	0.0	0.0	0.0	0.0	0.0	0.0	0.0	0.0
FUT8-AS1	645431	symbol	H. sapiens	645431	H. sapiens	FUT8-AS1	FUT8 antisense RNA 1								0.0	0.0	0.0	0.0	0.0	0.0	0.0	0.0	0.0	0.0	0.0	0.0	0.0	0.0	0.0	0.0	0.0	0.0	0.0	0.0
FXR2	9513	symbol	H. sapiens	9513	H. sapiens	FXR2	FMR1 autosomal homolog 2	GO:0051489 regulation of filopodium assembly;GO:0000381 regulation of alternative mRNA splicing, via spliceosome;GO:0046847 filopodium assembly		Predicted intracellular proteins	Cytosol (Supported)				1.0	0.0	0.0	0.0	0.0	0.0	0.0	0.0	0.0	0.0	0.0	0.0	1.0	0.0	0.0	0.0	1.0	0.0	0.0	0.0
FZD2	2535	symbol	H. sapiens	2535	H. sapiens	FZD2	frizzled class receptor 2	GO:0003150 muscular septum morphogenesis;GO:0003149 membranous septum morphogenesis;GO:0060022 hard palate development		Cancer-related genes:Candidate cancer biomarkers; G-protein coupled receptors:Family fz/smo receptors; G-protein coupled receptors:GPCRs excl olfactory receptors	Nuclear bodies;Nucleoplasm (Approved); Additional: Cell Junctions		(M77)PID WNT SIGNALING PATHWAY; (M23)PID WNT NONCANONICAL PATHWAY; (M5493)WNT SIGNALING	(M5942)HALLMARK UV RESPONSE DN	0.0	1.0	0.0	0.0	0.0	0.0	0.0	0.0	0.0	0.0	1.0	0.0	0.0	0.0	0.0	1.0	0.0	1.0	0.0	0.0
FZD5	7855	symbol	H. sapiens	7855	H. sapiens	FZD5	frizzled class receptor 5	GO:0060715 syncytiotrophoblast cell differentiation involved in labyrinthine layer development;GO:0060061 Spemann organizer formation;GO:0097360 chorionic trophoblast cell proliferation		G-protein coupled receptors:Family fz/smo receptors; G-protein coupled receptors:GPCRs excl olfactory receptors			(M31)PID BETA CATENIN DEG PATHWAY; (M90)PID WNT CANONICAL PATHWAY; (M77)PID WNT SIGNALING PATHWAY	(M5903)HALLMARK NOTCH SIGNALING; (M5932)HALLMARK INFLAMMATORY RESPONSE	0.0	1.0	0.0	1.0	0.0	0.0	0.0	0.0	0.0	0.0	0.0	0.0	0.0	0.0	0.0	1.0	0.0	1.0	0.0	0.0
FZD8	8325	symbol	H. sapiens	8325	H. sapiens	FZD8	frizzled class receptor 8	GO:0035567 non-canonical Wnt signaling pathway;GO:0060070 canonical Wnt signaling pathway;GO:0016055 Wnt signaling pathway		G-protein coupled receptors:Family fz/smo receptors; G-protein coupled receptors:GPCRs excl olfactory receptors	Endoplasmic reticulum (Approved)		(M77)PID WNT SIGNALING PATHWAY; (M5493)WNT SIGNALING	(M5895)HALLMARK WNT BETA CATENIN SIGNALING; (M5930)HALLMARK EPITHELIAL MESENCHYMAL TRANSITION	0.0	1.0	0.0	0.0	0.0	0.0	0.0	0.0	0.0	0.0	0.0	0.0	0.0	0.0	0.0	1.0	0.0	1.0	0.0	0.0
FZD9	8326	symbol	H. sapiens	8326	H. sapiens	FZD9	frizzled class receptor 9	GO:1903910 negative regulation of receptor clustering;GO:1904394 negative regulation of skeletal muscle acetylcholine-gated channel clustering;GO:1990523 bone regeneration		G-protein coupled receptors:Family fz/smo receptors; G-protein coupled receptors:GPCRs excl olfactory receptors; CD markers			(M77)PID WNT SIGNALING PATHWAY		0.0	0.0	0.0	1.0	0.0	0.0	0.0	0.0	0.0	0.0	0.0	1.0	0.0	0.0	0.0	1.0	0.0	0.0	0.0	0.0
G6PD	2539	symbol	H. sapiens	2539	H. sapiens	G6PD	glucose-6-phosphate dehydrogenase	GO:0010731 protein glutathionylation;GO:0010732 regulation of protein glutathionylation;GO:0010734 negative regulation of protein glutathionylation		Cancer-related genes:Candidate cancer biomarkers; Predicted intracellular proteins; Enzymes; ENZYME proteins:Oxidoreductases; Disease related genes; Potential drug targets	Cytosol (Enhanced); Additional: Centriolar satellite	Glycolic acid; Nicotinamide adenine dinucleotide phosphate; 16-Bromoepiandrosterone; Artenimol		(M5938)HALLMARK REACTIVE OXYGEN SPECIES PATHWAY; (M5924)HALLMARK MTORC1 SIGNALING; (M5937)HALLMARK GLYCOLYSIS	0.0	0.0	0.0	0.0	1.0	0.0	1.0	0.0	0.0	0.0	1.0	0.0	0.0	0.0	0.0	0.0	0.0	0.0	0.0	0.0
GADD45A	1647	symbol	H. sapiens	1647	H. sapiens	GADD45A	growth arrest and DNA damage inducible alpha	GO:0033140 negative regulation of peptidyl-serine phosphorylation of STAT protein;GO:0033139 regulation of peptidyl-serine phosphorylation of STAT protein;GO:0042501 serine phosphorylation of STAT protein		Cancer-related genes:Candidate cancer biomarkers; Predicted intracellular proteins	Nuclear speckles (Supported)		(M20)PID P38 MKK3 6PATHWAY; (M242)PID AURORA A PATHWAY; (M12012)ST P38 MAPK PATHWAY	(M5902)HALLMARK APOPTOSIS; (M5890)HALLMARK TNFA SIGNALING VIA NFKB; (M5905)HALLMARK ADIPOGENESIS	0.0	0.0	0.0	0.0	0.0	0.0	0.0	1.0	0.0	0.0	0.0	0.0	0.0	0.0	0.0	0.0	1.0	0.0	1.0	0.0
GADD45GIP1	90480	symbol	H. sapiens	90480	H. sapiens	GADD45GIP1	GADD45G interacting protein 1	GO:0007049 cell cycle;GO:0009987 cellular process;GO:0008150 biological_process		Predicted intracellular proteins; Ribosomal proteins	Mitochondria (Supported); Additional: Nucleoplasm				1.0	0.0	0.0	0.0	0.0	0.0	0.0	0.0	0.0	0.0	0.0	0.0	0.0	0.0	0.0	0.0	0.0	0.0	0.0	0.0
GALNT2	2590	symbol	H. sapiens	2590	H. sapiens	GALNT2	polypeptide N-acetylgalactosaminyltransferase 2	GO:0018243 protein O-linked glycosylation via threonine;GO:0018242 protein O-linked glycosylation via serine;GO:0016266 O-glycan processing		ENZYME proteins:Transferases; Predicted intracellular proteins; Enzymes	Golgi apparatus (Supported)				0.0	0.0	0.0	0.0	0.0	0.0	0.0	0.0	0.0	0.0	0.0	0.0	0.0	0.0	0.0	0.0	0.0	0.0	0.0	0.0
GALNT4	8693	symbol	H. sapiens	8693	H. sapiens	GALNT4	polypeptide N-acetylgalactosaminyltransferase 4	GO:0018243 protein O-linked glycosylation via threonine;GO:0018242 protein O-linked glycosylation via serine;GO:0016266 O-glycan processing		ENZYME proteins:Transferases; Predicted intracellular proteins; Enzymes	Golgi apparatus (Approved)				0.0	0.0	0.0	0.0	0.0	0.0	0.0	0.0	0.0	0.0	0.0	0.0	0.0	0.0	0.0	0.0	0.0	0.0	0.0	0.0
GAMT	2593	symbol	H. sapiens	2593	H. sapiens	GAMT	guanidinoacetate N-methyltransferase	GO:0006601 creatine biosynthetic process;GO:0006600 creatine metabolic process;GO:0042398 cellular modified amino acid biosynthetic process		ENZYME proteins:Transferases; Predicted intracellular proteins; FDA approved drug targets:Small molecule drugs; Enzymes; Disease related genes		Creatine; Guanidine; S-adenosyl-L-homocysteine; Glycocyamine; Phosphocreatine		(M5915)HALLMARK APICAL JUNCTION; (M5956)HALLMARK KRAS SIGNALING DN	1.0	0.0	0.0	0.0	0.0	0.0	0.0	0.0	0.0	0.0	0.0	0.0	0.0	0.0	0.0	0.0	0.0	0.0	0.0	0.0
GAN	8139	symbol	H. sapiens	8139	H. sapiens	GAN	gigaxonin	GO:0016567 protein ubiquitination;GO:0032446 protein modification by small protein conjugation;GO:0070647 protein modification by small protein conjugation or removal		Predicted intracellular proteins; Disease related genes	Microtubules (Supported)				0.0	0.0	0.0	0.0	0.0	0.0	0.0	0.0	0.0	0.0	0.0	0.0	0.0	1.0	0.0	0.0	0.0	0.0	0.0	0.0
GATA6	2627	symbol	H. sapiens	2627	H. sapiens	GATA6	GATA binding protein 6	GO:1904002 regulation of sebum secreting cell proliferation;GO:1904003 negative regulation of sebum secreting cell proliferation;GO:1990654 sebum secreting cell proliferation		Transcription factors:Zinc-coordinating DNA-binding domains; Disease related genes; Predicted intracellular proteins	Nucleoplasm (Supported)		(M288)PID HES HEY PATHWAY		0.0	0.0	0.0	0.0	0.0	0.0	0.0	1.0	0.0	0.0	1.0	0.0	0.0	0.0	0.0	0.0	0.0	0.0	0.0	0.0
GATSL2	729438	gene_synonym	H. sapiens	729438	H. sapiens	CASTOR2	cytosolic arginine sensor for mTORC1 subunit 2	GO:1903577 cellular response to L-arginine;GO:1903576 response to L-arginine;GO:1904262 negative regulation of TORC1 signaling		Predicted intracellular proteins					1.0	0.0	0.0	0.0	0.0	0.0	0.0	0.0	0.0	0.0	0.0	1.0	0.0	0.0	0.0	0.0	0.0	0.0	0.0	0.0
GATSL3	652968	gene_synonym	H. sapiens	652968	H. sapiens	CASTOR1	cytosolic arginine sensor for mTORC1 subunit 1	GO:1903577 cellular response to L-arginine;GO:1903576 response to L-arginine;GO:1904262 negative regulation of TORC1 signaling		Predicted intracellular proteins					1.0	0.0	0.0	0.0	0.0	0.0	0.0	0.0	0.0	0.0	0.0	1.0	0.0	0.0	0.0	0.0	0.0	0.0	0.0	0.0
GCAT	23464	symbol	H. sapiens	23464	H. sapiens	GCAT	glycine C-acetyltransferase	GO:0019518 L-threonine catabolic process to glycine;GO:0006567 threonine catabolic process;GO:0006566 threonine metabolic process		ENZYME proteins:Transferases; Predicted intracellular proteins; Enzymes	Nucleoplasm (Supported); Additional: Mitochondria;Nuclear speckles	Pyridoxal phosphate; Glycine			1.0	0.0	0.0	0.0	0.0	0.0	0.0	0.0	0.0	0.0	0.0	0.0	0.0	0.0	0.0	0.0	0.0	0.0	0.0	0.0
GCDH	2639	symbol	H. sapiens	2639	H. sapiens	GCDH	glutaryl-CoA dehydrogenase	GO:0033539 fatty acid beta-oxidation using acyl-CoA dehydrogenase;GO:0006568 tryptophan metabolic process;GO:0006586 indolalkylamine metabolic process		Predicted intracellular proteins; Enzymes; ENZYME proteins:Oxidoreductases; Disease related genes; Potential drug targets	Mitochondria (Supported)	Flavin adenine dinucleotide; S-4-Nitrobutyryl-CoA		(M5935)HALLMARK FATTY ACID METABOLISM	1.0	0.0	0.0	0.0	0.0	0.0	0.0	0.0	0.0	0.0	0.0	0.0	0.0	0.0	0.0	0.0	0.0	0.0	0.0	0.0
GCSH	2653	symbol	H. sapiens	2653	H. sapiens	GCSH	glycine cleavage system protein H	GO:0006546 glycine catabolic process;GO:0019464 glycine decarboxylation via glycine cleavage system;GO:0009249 protein lipoylation		Predicted intracellular proteins; Disease related genes	Vesicles (Approved)	6-(Hydroxyethyldithio)-8-(Aminomethylthio)Octanoic Acid; Dihydrolipoic Acid			1.0	0.0	0.0	0.0	0.0	0.0	0.0	0.0	0.0	0.0	0.0	0.0	0.0	0.0	0.0	0.0	0.0	0.0	0.0	0.0
GDF15	9518	symbol	H. sapiens	9518	H. sapiens	GDF15	growth differentiation factor 15	GO:0060400 negative regulation of growth hormone receptor signaling pathway;GO:0002023 reduction of food intake in response to dietary excess;GO:0060398 regulation of growth hormone receptor signaling pathway		Cancer-related genes:Candidate cancer biomarkers; Predicted intracellular proteins; Predicted secreted proteins; Disease related genes	Golgi apparatus (Enhanced)		(M256)PID TAP63 PATHWAY; (M19)PID P73PATHWAY; (M145)PID P53 DOWNSTREAM PATHWAY		0.0	0.0	0.0	0.0	0.0	0.0	0.0	0.0	0.0	0.0	1.0	0.0	0.0	0.0	0.0	0.0	0.0	0.0	0.0	0.0
GDPGP1	390637	symbol	H. sapiens	390637	H. sapiens	GDPGP1	GDP-D-glucose phosphorylase 1	GO:0006006 glucose metabolic process;GO:0019318 hexose metabolic process;GO:0005996 monosaccharide metabolic process		ENZYME proteins:Transferases; Predicted intracellular proteins; Enzymes	Cytosol (Approved)				0.0	0.0	0.0	0.0	0.0	0.0	0.0	0.0	0.0	0.0	0.0	0.0	0.0	0.0	0.0	0.0	0.0	0.0	0.0	0.0
genename						None	None	None	None	None	None	None	None	None	nan	nan	nan	nan	nan	nan	nan	nan	nan	nan	nan	nan	nan	nan	nan	nan	nan	nan	nan	nan
GFER	2671	symbol	H. sapiens	2671	H. sapiens	GFER	growth factor, augmenter of liver regeneration	GO:0001889 liver development;GO:0061008 hepaticobiliary system development;GO:0048732 gland development		Predicted intracellular proteins; Enzymes; ENZYME proteins:Oxidoreductases; Disease related genes; Potential drug targets	Cytosol;Mitochondria (Enhanced)	Flavin adenine dinucleotide			0.0	0.0	0.0	1.0	0.0	0.0	0.0	0.0	0.0	0.0	0.0	0.0	0.0	0.0	0.0	0.0	0.0	0.0	0.0	0.0
GGT5	2687	symbol	H. sapiens	2687	H. sapiens	GGT5	gamma-glutamyltransferase 5	GO:1901748 leukotriene D4 metabolic process;GO:1901750 leukotriene D4 biosynthetic process;GO:0006751 glutathione catabolic process		ENZYME proteins:Transferases; Predicted intracellular proteins; ENZYME proteins:Hydrolases; Enzymes	Nucleoli fibrillar center (Approved)				1.0	0.0	0.0	0.0	0.0	0.0	0.0	0.0	0.0	0.0	0.0	0.0	0.0	0.0	0.0	0.0	0.0	0.0	0.0	0.0
GJC2	57165	symbol	H. sapiens	57165	H. sapiens	GJC2	gap junction protein gamma 2	GO:0070447 positive regulation of oligodendrocyte progenitor proliferation;GO:0070444 oligodendrocyte progenitor proliferation;GO:0070445 regulation of oligodendrocyte progenitor proliferation		Disease related genes	Cytosol;Plasma membrane (Supported)				0.0	0.0	0.0	0.0	0.0	0.0	0.0	0.0	0.0	0.0	0.0	0.0	0.0	0.0	0.0	0.0	0.0	0.0	0.0	0.0
GJD3	125111	symbol	H. sapiens	125111	H. sapiens	GJD3	gap junction protein delta 3	GO:0010651 negative regulation of cell communication by electrical coupling;GO:1901845 negative regulation of cell communication by electrical coupling involved in cardiac conduction;GO:1903780 negative regulation of cardiac conduction							0.0	0.0	0.0	0.0	0.0	0.0	0.0	0.0	0.0	0.0	0.0	0.0	0.0	0.0	0.0	0.0	0.0	0.0	0.0	0.0
GK	2710	symbol	H. sapiens	2710	H. sapiens	GK	glycerol kinase	GO:0046167 glycerol-3-phosphate biosynthetic process;GO:0019563 glycerol catabolic process;GO:0019405 alditol catabolic process		ENZYME proteins:Transferases; Predicted intracellular proteins; Enzymes; Disease related genes; Potential drug targets					0.0	0.0	0.0	0.0	0.0	0.0	0.0	0.0	0.0	0.0	0.0	0.0	0.0	0.0	0.0	0.0	0.0	0.0	0.0	0.0
GLI4	2738	symbol	H. sapiens	2738	H. sapiens	GLI4	GLI family zinc finger 4	GO:0006357 regulation of transcription by RNA polymerase II;GO:0006366 transcription by RNA polymerase II;GO:0006355 regulation of transcription, DNA-templated		Transcription factors:Zinc-coordinating DNA-binding domains; Predicted intracellular proteins	Cytokinetic bridge;Nucleoplasm (Approved)				0.0	0.0	0.0	0.0	0.0	0.0	0.0	0.0	0.0	0.0	0.0	0.0	0.0	0.0	0.0	0.0	0.0	0.0	0.0	0.0
GLRX2	51022	symbol	H. sapiens	51022	H. sapiens	GLRX2	glutaredoxin 2	GO:0042262 DNA protection;GO:0051775 response to redox state;GO:0071450 cellular response to oxygen radical		Predicted intracellular proteins	Nucleoplasm (Supported); Additional: Vesicles	Glutathione		(M5938)HALLMARK REACTIVE OXYGEN SPECIES PATHWAY	0.0	0.0	0.0	0.0	1.0	0.0	0.0	0.0	0.0	0.0	0.0	0.0	0.0	0.0	0.0	0.0	0.0	0.0	0.0	0.0
GLRX5	51218	symbol	H. sapiens	51218	H. sapiens	GLRX5	glutaredoxin 5	GO:0106034 protein maturation by [2Fe-2S] cluster transfer;GO:0044571 [2Fe-2S] cluster assembly;GO:0106035 protein maturation by [4Fe-4S] cluster transfer		Predicted intracellular proteins; Disease related genes	Mitochondria (Supported)			(M5945)HALLMARK HEME METABOLISM	0.0	0.0	0.0	0.0	0.0	0.0	0.0	0.0	0.0	0.0	0.0	0.0	0.0	0.0	0.0	0.0	0.0	0.0	0.0	0.0
GLTPD2	388323	symbol	H. sapiens	388323	H. sapiens	GLTPD2	glycolipid transfer protein domain containing 2	GO:1902389 ceramide 1-phosphate transport;GO:0035627 ceramide transport;GO:0120009 intermembrane lipid transfer		Predicted secreted proteins	Vesicles (Approved)				0.0	0.0	0.0	0.0	0.0	0.0	0.0	0.0	0.0	0.0	0.0	0.0	0.0	0.0	0.0	0.0	0.0	0.0	0.0	0.0
GLTSCR2	29997	gene_synonym	H. sapiens	29997	H. sapiens	NOP53	NOP53 ribosome biogenesis factor	GO:1903004 regulation of protein K63-linked deubiquitination;GO:1903006 positive regulation of protein K63-linked deubiquitination;GO:1901837 negative regulation of transcription of nucleolar large rRNA by RNA polymerase I		Predicted intracellular proteins	Nucleoli (Supported)				0.0	0.0	0.0	0.0	1.0	0.0	0.0	0.0	0.0	1.0	0.0	1.0	0.0	1.0	0.0	0.0	0.0	0.0	1.0	1.0
GNA11	2767	symbol	H. sapiens	2767	H. sapiens	GNA11	G protein subunit alpha 11	GO:0045634 regulation of melanocyte differentiation;GO:0050932 regulation of pigment cell differentiation;GO:0060158 phospholipase C-activating dopamine receptor signaling pathway		Predicted intracellular proteins; Disease related genes; Cancer-related genes			(M138)PID THROMBIN PAR4 PATHWAY; (M155)PID S1P META PATHWAY; (M268)PID S1P S1P2 PATHWAY		0.0	0.0	0.0	0.0	0.0	0.0	0.0	0.0	0.0	0.0	1.0	0.0	0.0	0.0	0.0	0.0	0.0	0.0	0.0	0.0
GNG10	2790	symbol	H. sapiens	2790	H. sapiens	GNG10	G protein subunit gamma 10	GO:0007186 G protein-coupled receptor signaling pathway;GO:0007165 signal transduction;GO:0023052 signaling		Predicted intracellular proteins; RAS pathway related proteins					0.0	1.0	0.0	0.0	0.0	0.0	0.0	0.0	0.0	0.0	0.0	0.0	0.0	0.0	0.0	0.0	0.0	1.0	0.0	0.0
GNL3L	54552	symbol	H. sapiens	54552	H. sapiens	GNL3L	G protein nucleolar 3 like	GO:0033234 negative regulation of protein sumoylation;GO:1904816 positive regulation of protein localization to chromosome, telomeric region;GO:1904814 regulation of protein localization to chromosome, telomeric region		Predicted intracellular proteins	Nucleoli (Supported); Additional: Cytosol;Nucleoplasm				0.0	1.0	0.0	0.0	0.0	0.0	0.0	0.0	0.0	1.0	0.0	0.0	0.0	0.0	0.0	0.0	0.0	0.0	0.0	0.0
GNPTG	84572	symbol	H. sapiens	84572	H. sapiens	GNPTG	N-acetylglucosamine-1-phosphate transferase subunit gamma	GO:0046835 carbohydrate phosphorylation;GO:0044262 cellular carbohydrate metabolic process;GO:0005975 carbohydrate metabolic process		Predicted intracellular proteins; Disease related genes	Endoplasmic reticulum (Approved); Additional: Cytosol				0.0	0.0	0.0	0.0	0.0	0.0	0.0	0.0	0.0	0.0	0.0	0.0	0.0	0.0	0.0	0.0	0.0	0.0	0.0	0.0
GOLGA2P10	80154	symbol	H. sapiens	80154	H. sapiens	GOLGA2P10	GOLGA2 pseudogene 10								0.0	0.0	0.0	0.0	0.0	0.0	0.0	0.0	0.0	0.0	0.0	0.0	0.0	0.0	0.0	0.0	0.0	0.0	0.0	0.0
GOLGA2P7	388152	symbol	H. sapiens	388152	H. sapiens	GOLGA2P7	GOLGA2 pseudogene 7								0.0	0.0	0.0	0.0	0.0	0.0	0.0	0.0	0.0	0.0	0.0	0.0	0.0	0.0	0.0	0.0	0.0	0.0	0.0	0.0
GOLGA3	2802	symbol	H. sapiens	2802	H. sapiens	GOLGA3	golgin A3	GO:0007283 spermatogenesis;GO:0048232 male gamete generation;GO:0007276 gamete generation		Predicted intracellular proteins	Golgi apparatus (Supported); Additional: Nucleoplasm				0.0	1.0	0.0	0.0	0.0	0.0	0.0	0.0	0.0	0.0	0.0	0.0	0.0	0.0	0.0	0.0	0.0	0.0	0.0	0.0
GPR135	64582	symbol	H. sapiens	64582	H. sapiens	GPR135	G protein-coupled receptor 135	GO:0007186 G protein-coupled receptor signaling pathway;GO:0007165 signal transduction;GO:0023052 signaling		G-protein coupled receptors:GPCRs excl olfactory receptors					0.0	0.0	0.0	0.0	0.0	0.0	0.0	0.0	0.0	0.0	0.0	0.0	0.0	0.0	0.0	0.0	0.0	0.0	0.0	0.0
GPR150	285601	symbol	H. sapiens	285601	H. sapiens	GPR150	G protein-coupled receptor 150	GO:0007186 G protein-coupled receptor signaling pathway;GO:0007165 signal transduction;GO:0023052 signaling		G-protein coupled receptors:GPCRs excl olfactory receptors					0.0	0.0	0.0	0.0	0.0	0.0	0.0	0.0	0.0	0.0	0.0	0.0	0.0	0.0	0.0	0.0	0.0	0.0	0.0	0.0
GPR157	80045	symbol	H. sapiens	80045	H. sapiens	GPR157	G protein-coupled receptor 157	GO:0060019 radial glial cell differentiation;GO:0051482 positive regulation of cytosolic calcium ion concentration involved in phospholipase C-activating G protein-coupled signaling pathway;GO:0048512 circadian behavior		G-protein coupled receptors:GPCRs excl olfactory receptors; G-protein coupled receptors:Family 2 (B) receptors	Nucleoli;Nucleoli rim (Uncertain); Additional: Cell Junctions;Plasma membrane				0.0	0.0	0.0	0.0	0.0	0.0	0.0	0.0	0.0	0.0	0.0	0.0	0.0	0.0	0.0	0.0	0.0	0.0	0.0	0.0
GPR162	27239	symbol	H. sapiens	27239	H. sapiens	GPR162	G protein-coupled receptor 162	GO:0007186 G protein-coupled receptor signaling pathway;GO:0007165 signal transduction;GO:0023052 signaling		Predicted intracellular proteins; G-protein coupled receptors:GPCRs excl olfactory receptors	Centriolar satellite (Approved)				0.0	0.0	0.0	0.0	0.0	0.0	0.0	0.0	0.0	0.0	0.0	0.0	0.0	0.0	0.0	0.0	0.0	0.0	0.0	0.0
GPR183	1880	symbol	H. sapiens	1880	H. sapiens	GPR183	G protein-coupled receptor 183	GO:0036145 dendritic cell homeostasis;GO:0035700 astrocyte chemotaxis;GO:2000458 regulation of astrocyte chemotaxis		G-protein coupled receptors:GPCRs excl olfactory receptors	Nuclear membrane;Vesicles (Approved)			(M5890)HALLMARK TNFA SIGNALING VIA NFKB; (M5932)HALLMARK INFLAMMATORY RESPONSE	0.0	0.0	0.0	0.0	0.0	0.0	1.0	0.0	0.0	0.0	0.0	0.0	0.0	0.0	0.0	0.0	0.0	0.0	0.0	0.0
GPR21	2844	symbol	H. sapiens	2844	H. sapiens	GPR21	G protein-coupled receptor 21	GO:0040018 positive regulation of multicellular organism growth;GO:0046627 negative regulation of insulin receptor signaling pathway;GO:1900077 negative regulation of cellular response to insulin stimulus		G-protein coupled receptors:GPCRs excl olfactory receptors					0.0	0.0	0.0	0.0	0.0	0.0	0.0	0.0	0.0	0.0	0.0	0.0	0.0	0.0	0.0	0.0	0.0	0.0	0.0	0.0
GPR89B	51463	symbol	H. sapiens	51463	H. sapiens	GPR89B	G protein-coupled receptor 89B	GO:0051452 intracellular pH reduction;GO:0045851 pH reduction;GO:0051453 regulation of intracellular pH			Endoplasmic reticulum (Approved)				0.0	0.0	0.0	0.0	0.0	0.0	0.0	0.0	0.0	0.0	0.0	0.0	0.0	0.0	0.0	0.0	0.0	0.0	0.0	0.0
GPRC5A	9052	symbol	H. sapiens	9052	H. sapiens	GPRC5A	G protein-coupled receptor class C group 5 member A	GO:0007175 negative regulation of epidermal growth factor-activated receptor activity;GO:0042059 negative regulation of epidermal growth factor receptor signaling pathway;GO:0007176 regulation of epidermal growth factor-activated receptor activity		Predicted intracellular proteins; G-protein coupled receptors:Family 3 (C) receptors; G-protein coupled receptors:GPCRs excl olfactory receptors	Plasma membrane;Vesicles (Enhanced)	Tretinoin			0.0	0.0	0.0	0.0	0.0	0.0	0.0	0.0	0.0	0.0	0.0	0.0	0.0	0.0	0.0	0.0	0.0	0.0	0.0	0.0
GPSM1	26086	symbol	H. sapiens	26086	H. sapiens	GPSM1	G protein signaling modulator 1	GO:1905098 negative regulation of guanyl-nucleotide exchange factor activity;GO:1905097 regulation of guanyl-nucleotide exchange factor activity;GO:1904424 regulation of GTP binding		Predicted intracellular proteins	Golgi apparatus (Supported); Additional: Nucleoplasm				0.0	0.0	0.0	0.0	0.0	0.0	0.0	0.0	0.0	0.0	0.0	0.0	0.0	0.0	0.0	0.0	0.0	0.0	0.0	1.0
GPT2	84706	symbol	H. sapiens	84706	H. sapiens	GPT2	glutamic--pyruvic transaminase 2	GO:0042851 L-alanine metabolic process;GO:0042853 L-alanine catabolic process;GO:0006522 alanine metabolic process		ENZYME proteins:Transferases; Predicted intracellular proteins; Enzymes; Disease related genes; Potential drug targets	Mitochondria (Approved)	Pyridoxal phosphate; Glutamic acid; Alanine; Phenelzine			1.0	0.0	0.0	0.0	0.0	0.0	0.0	0.0	0.0	0.0	0.0	0.0	0.0	0.0	0.0	0.0	0.0	0.0	0.0	0.0
GPX1	2876	symbol	H. sapiens	2876	H. sapiens	GPX1	glutathione peroxidase 1	GO:0009608 response to symbiont;GO:0009609 response to symbiotic bacterium;GO:0010269 response to selenium ion				Glutathione; Cannabidiol; Medical Cannabis; Nabiximols	(M145)PID P53 DOWNSTREAM PATHWAY	(M5902)HALLMARK APOPTOSIS	1.0	0.0	1.0	1.0	1.0	0.0	0.0	0.0	0.0	0.0	1.0	1.0	1.0	1.0	0.0	0.0	1.0	1.0	0.0	1.0
GRAMD1A	57655	symbol	H. sapiens	57655	H. sapiens	GRAMD1A	GRAM domain containing 1A	GO:0071397 cellular response to cholesterol;GO:0036315 cellular response to sterol;GO:0070723 response to cholesterol		Predicted intracellular proteins	Plasma membrane (Supported); Additional: Cytosol				0.0	0.0	0.0	0.0	0.0	0.0	0.0	0.0	0.0	0.0	0.0	0.0	0.0	0.0	0.0	0.0	0.0	0.0	0.0	0.0
GRHPR	9380	symbol	H. sapiens	9380	H. sapiens	GRHPR	glyoxylate and hydroxypyruvate reductase	GO:0046487 glyoxylate metabolic process;GO:0006081 cellular aldehyde metabolic process;GO:0007588 excretion		Predicted intracellular proteins; Enzymes; ENZYME proteins:Oxidoreductases; Disease related genes; Potential drug targets	Cytosol (Approved); Additional: Nucleoplasm			(M5935)HALLMARK FATTY ACID METABOLISM; (M5891)HALLMARK HYPOXIA	1.0	0.0	0.0	0.0	0.0	0.0	0.0	0.0	0.0	0.0	0.0	0.0	0.0	0.0	0.0	0.0	0.0	0.0	0.0	0.0
GRIN3B	116444	symbol	H. sapiens	116444	H. sapiens	GRIN3B	glutamate ionotropic receptor NMDA type subunit 3B	GO:0035235 ionotropic glutamate receptor signaling pathway;GO:0007215 glutamate receptor signaling pathway;GO:0051205 protein insertion into membrane		FDA approved drug targets:Small molecule drugs		Glycine; Halothane; Orphenadrine; Tenocyclidine			0.0	1.0	0.0	0.0	0.0	0.0	0.0	0.0	0.0	0.0	0.0	0.0	0.0	0.0	0.0	0.0	0.0	0.0	0.0	0.0
GRK4	2868	symbol	H. sapiens	2868	H. sapiens	GRK4	G protein-coupled receptor kinase 4	GO:0022400 regulation of rhodopsin mediated signaling pathway;GO:0016056 rhodopsin mediated signaling pathway;GO:0002031 G protein-coupled receptor internalization	AGC Ser/Thr protein kinase family	ENZYME proteins:Transferases; Predicted intracellular proteins; Kinases:AGC Ser/Thr protein kinases; Enzymes	Lysosomes (Approved)				0.0	0.0	0.0	0.0	0.0	0.0	0.0	0.0	0.0	0.0	0.0	0.0	0.0	0.0	0.0	0.0	0.0	0.0	0.0	0.0
GSG1L	146395	symbol	H. sapiens	146395	H. sapiens	GSG1L	GSG1 like	GO:0099149 regulation of postsynaptic neurotransmitter receptor internalization;GO:0098884 postsynaptic neurotransmitter receptor internalization;GO:0140239 postsynaptic endocytosis		Transporters:Accessory Factors Involved in Transport					0.0	0.0	0.0	0.0	0.0	0.0	0.0	0.0	0.0	0.0	0.0	0.0	0.0	0.0	0.0	0.0	0.0	0.0	0.0	0.0
GSR	2936	symbol	H. sapiens	2936	H. sapiens	GSR	glutathione-disulfide reductase	GO:0045454 cell redox homeostasis;GO:0006749 glutathione metabolic process;GO:0098869 cellular oxidant detoxification		Cancer-related genes:Candidate cancer biomarkers; Predicted intracellular proteins; FDA approved drug targets:Small molecule drugs; Enzymes; ENZYME proteins:Oxidoreductases	Cytosol (Supported)	Glutathione; NADH; Carmustine; 3,6-dihydroxy-xanthene-9-propionic acid; 3-sulfino-L-alanine; Glutathionylspermidine disulfide; 3-(Prop-2-Ene-1-Sulfinyl)-Propene-1-Thiol; Flavin adenine dinucleotide; Glutathione disulfide; 3-nitro-L-tyrosine; 2-(2-PHENYL-3-PYRIDIN-2-YL-4,5,6,7-TETRAHYDRO-2H-ISOPHOSPHINDOL-1-YL)PYRIDINE; 6-(3-METHYL-1,4-DIOXO-1,4-DIHYDRONAPHTHALEN-2-YL)HEXANOIC ACID; Cannabidiol; C…		(M5938)HALLMARK REACTIVE OXYGEN SPECIES PATHWAY; (M5908)HALLMARK ANDROGEN RESPONSE; (M5902)HALLMARK APOPTOSIS	1.0	0.0	0.0	0.0	1.0	0.0	0.0	0.0	0.0	0.0	0.0	0.0	0.0	0.0	0.0	0.0	0.0	1.0	0.0	0.0
GSTP1	2950	symbol	H. sapiens	2950	H. sapiens	GSTP1	glutathione S-transferase pi 1	GO:0035732 nitric oxide storage;GO:0071460 cellular response to cell-matrix adhesion;GO:0033484 nitric oxide homeostasis		Cancer-related genes:Candidate cancer biomarkers; Predicted intracellular proteins; ENZYME proteins:Transferases; Enzymes	Cytosol;Mitochondria (Supported)	Glutathione; Troglitazone; Clozapine; Etacrynic acid; Clomipramine; (9R,10R)-9-(S-glutathionyl)-10-hydroxy-9,10-dihydrophenanthrene; S-Hydroxycysteine; Cibacron Blue; Glutathione sulfonic acid; Deoxycholic acid; S-(4-nitrobenzyl)glutathione; 2-(N-morpholino)ethanesulfonic acid; S-Hexylglutathione; Carbocisteine; Canfosfamide; Ezatiostat; Exisulind; S-NONYL-CYSTEINE; S-(4-BROMOBENZYL)CYSTEINE; Cur…			1.0	0.0	0.0	0.0	0.0	0.0	0.0	0.0	0.0	0.0	0.0	1.0	0.0	0.0	0.0	0.0	1.0	1.0	0.0	0.0
GSTZ1	2954	symbol	H. sapiens	2954	H. sapiens	GSTZ1	glutathione S-transferase zeta 1	GO:0006572 tyrosine catabolic process;GO:0006559 L-phenylalanine catabolic process;GO:1902222 erythrose 4-phosphate/phosphoenolpyruvate family amino acid catabolic process		ENZYME proteins:Transferases; ENZYME proteins:Isomerase; Predicted intracellular proteins; Enzymes; Disease related genes; Potential drug targets	Cytosol (Approved); Additional: Nucleoplasm	Glutathione; 1,4-Dithiothreitol; Dichloroacetic acid; Glycerin		(M5935)HALLMARK FATTY ACID METABOLISM	1.0	0.0	0.0	0.0	1.0	0.0	0.0	0.0	0.0	0.0	0.0	0.0	0.0	0.0	0.0	0.0	0.0	0.0	0.0	0.0
GTF2E2	2961	symbol	H. sapiens	2961	H. sapiens	GTF2E2	general transcription factor IIE subunit 2	GO:0006367 transcription initiation from RNA polymerase II promoter;GO:0006352 DNA-templated transcription, initiation;GO:0006366 transcription by RNA polymerase II		Predicted intracellular proteins; Disease related genes	Nucleoplasm (Enhanced); Additional: Cytosol				0.0	1.0	0.0	0.0	0.0	0.0	0.0	0.0	0.0	0.0	0.0	0.0	0.0	0.0	0.0	0.0	0.0	1.0	1.0	0.0
GTF2H2B	653238	symbol	H. sapiens	653238	H. sapiens	GTF2H2B	general transcription factor IIH subunit 2B (pseudogene)								0.0	0.0	0.0	0.0	0.0	0.0	0.0	0.0	0.0	0.0	0.0	0.0	0.0	0.0	0.0	0.0	0.0	0.0	0.0	0.0
GTF2H2C_2	730394	symbol	H. sapiens	730394	H. sapiens	GTF2H2C_2	GTF2H2 family member C, copy 2	GO:0006289 nucleotide-excision repair;GO:0006281 DNA repair;GO:0006974 cellular response to DNA damage stimulus							0.0	1.0	0.0	0.0	0.0	0.0	0.0	0.0	0.0	0.0	0.0	0.0	0.0	0.0	0.0	0.0	0.0	0.0	0.0	0.0
GTF2I	2969	symbol	H. sapiens	2969	H. sapiens	GTF2I	general transcription factor IIi	GO:0100026 positive regulation of DNA repair by transcription from RNA polymerase II promoter;GO:0051481 negative regulation of cytosolic calcium ion concentration;GO:0016525 negative regulation of angiogenesis		Predicted intracellular proteins; Disease related genes	Nucleoplasm (Enhanced)				0.0	0.0	0.0	0.0	0.0	0.0	0.0	0.0	0.0	0.0	0.0	0.0	0.0	0.0	0.0	0.0	0.0	0.0	1.0	0.0
GTF2IP1	2970	symbol	H. sapiens	2970	H. sapiens	GTF2IP1	general transcription factor IIi pseudogene 1								0.0	0.0	0.0	0.0	0.0	0.0	0.0	0.0	0.0	0.0	0.0	0.0	0.0	0.0	0.0	0.0	0.0	0.0	0.0	0.0
GUK1	2987	symbol	H. sapiens	2987	H. sapiens	GUK1	guanylate kinase 1	GO:0006185 dGDP biosynthetic process;GO:0046711 GDP biosynthetic process;GO:0009183 purine deoxyribonucleoside diphosphate biosynthetic process		ENZYME proteins:Transferases; Predicted intracellular proteins; Enzymes	Nucleoplasm (Uncertain); Additional: Cytosol	Guanosine-5'-Monophosphate		(M5898)HALLMARK DNA REPAIR	0.0	0.0	0.0	0.0	1.0	0.0	0.0	0.0	0.0	0.0	0.0	0.0	0.0	0.0	0.0	0.0	0.0	0.0	0.0	0.0
H19	283120	symbol	H. sapiens	283120	H. sapiens	H19	H19 imprinted maternally expressed transcript	GO:1903945 positive regulation of hepatocyte apoptotic process;GO:1901670 negative regulation of superoxide dismutase activity;GO:1904832 negative regulation of removal of superoxide radicals							0.0	0.0	0.0	0.0	1.0	0.0	0.0	0.0	0.0	0.0	0.0	0.0	0.0	0.0	0.0	0.0	1.0	0.0	0.0	0.0
H2AFJ	55766	gene_synonym	H. sapiens	55766	H. sapiens	H2AJ	H2A.J histone	GO:0006342 chromatin silencing;GO:0045814 negative regulation of gene expression, epigenetic;GO:0097549 chromatin organization involved in negative regulation of transcription		Predicted intracellular proteins	Nucleoplasm (Approved)			(M5939)HALLMARK P53 PATHWAY	1.0	1.0	1.0	0.0	0.0	0.0	0.0	1.0	0.0	0.0	0.0	0.0	0.0	0.0	0.0	0.0	0.0	0.0	0.0	0.0
H3F3B	3021	gene_synonym	H. sapiens	3021	H. sapiens	H3-3B	H3.3 histone B	GO:0006336 DNA replication-independent nucleosome assembly;GO:0034724 DNA replication-independent nucleosome organization;GO:0006334 nucleosome assembly		Predicted intracellular proteins; Disease related genes; Cancer-related genes	Nucleoplasm (Enhanced)				1.0	1.0	0.0	0.0	0.0	0.0	0.0	1.0	0.0	0.0	0.0	0.0	0.0	0.0	0.0	0.0	0.0	0.0	0.0	0.0
HAS2-AS1	594842	symbol	H. sapiens	594842	H. sapiens	HAS2-AS1	HAS2 antisense RNA 1								0.0	0.0	0.0	0.0	0.0	0.0	0.0	0.0	0.0	0.0	0.0	0.0	0.0	0.0	0.0	0.0	0.0	0.0	0.0	0.0
HAX1	10456	symbol	H. sapiens	10456	H. sapiens	HAX1	HCLS1 associated protein X-1	GO:0030854 positive regulation of granulocyte differentiation;GO:0030852 regulation of granulocyte differentiation;GO:2000251 positive regulation of actin cytoskeleton reorganization		Predicted intracellular proteins; Disease related genes	Mitochondria (Supported)			(M5897)HALLMARK IL6 JAK STAT3 SIGNALING; (M5937)HALLMARK GLYCOLYSIS	0.0	0.0	0.0	1.0	0.0	0.0	1.0	0.0	0.0	0.0	0.0	0.0	0.0	0.0	0.0	0.0	0.0	0.0	0.0	0.0
HBEGF	1839	symbol	H. sapiens	1839	H. sapiens	HBEGF	heparin binding EGF like growth factor	GO:0051543 regulation of elastin biosynthetic process;GO:0051545 negative regulation of elastin biosynthetic process;GO:0051542 elastin biosynthetic process		Predicted secreted proteins			(M201)PID ERBB NETWORK PATHWAY; (M13)PID ERBB4 PATHWAY; (M41)PID ER NONGENOMIC PATHWAY	(M5890)HALLMARK TNFA SIGNALING VIA NFKB; (M5909)HALLMARK MYOGENESIS; (M5932)HALLMARK INFLAMMATORY RESPONSE	0.0	1.0	0.0	0.0	0.0	0.0	0.0	0.0	0.0	0.0	1.0	0.0	1.0	0.0	0.0	0.0	0.0	1.0	0.0	0.0
HCN2	610	symbol	H. sapiens	610	H. sapiens	HCN2	hyperpolarization activated cyclic nucleotide gated potassium and sodium channel 2	GO:0071321 cellular response to cGMP;GO:0070305 response to cGMP;GO:0098719 sodium ion import across plasma membrane		Transporters:Transporter channels and pores; Voltage-gated ion channels:Cyclic Nucleotide-Regulated Channels		Cyclic GMP; Cyclic adenosine monophosphate; Ivabradine			0.0	0.0	0.0	0.0	0.0	0.0	0.0	0.0	0.0	0.0	0.0	0.0	0.0	0.0	0.0	0.0	0.0	0.0	0.0	0.0
HDAC10	83933	symbol	H. sapiens	83933	H. sapiens	HDAC10	histone deacetylase 10	GO:0106047 polyamine deacetylation;GO:0106048 spermidine deacetylation;GO:0032425 positive regulation of mismatch repair		Cancer-related genes:Candidate cancer biomarkers; Predicted intracellular proteins; FDA approved drug targets:Small molecule drugs; ENZYME proteins:Hydrolases; Enzymes		Bufexamac	(M30)PID HDAC CLASSII PATHWAY; (M101)PID HDAC CLASSI PATHWAY		0.0	1.0	0.0	0.0	0.0	0.0	0.0	0.0	0.0	0.0	0.0	0.0	0.0	0.0	0.0	0.0	1.0	1.0	0.0	0.0
HDAC4	9759	symbol	H. sapiens	9759	H. sapiens	HDAC4	histone deacetylase 4	GO:1902435 regulation of male mating behavior;GO:1902437 positive regulation of male mating behavior;GO:0014870 response to muscle inactivity		Predicted intracellular proteins; FDA approved drug targets:Small molecule drugs; ENZYME proteins:Hydrolases; Enzymes; Disease related genes	Nuclear speckles (Supported); Additional: Cytosol;Nucleoplasm	Zinc; Romidepsin; N-hydroxy-5-[(3-phenyl-5,6-dihydroimidazo[1,2-a]pyrazin-7(8H)-yl)carbonyl]thiophene-2-carboxamide; 2,2,2-TRIFLUORO-1-{5-[(3-PHENYL-5,6-DIHYDROIMIDAZO[1,2-A]PYRAZIN-7(8H)-YL)CARBONYL]THIOPHEN-2-YL}ETHANE-1,1-DIOL; Zinc acetate; Zinc chloride; Zinc sulfate, unspecified form	(M140)PID RANBP2 PATHWAY; (M32)PID HDAC CLASSIII PATHWAY; (M30)PID HDAC CLASSII PATHWAY		0.0	1.0	1.0	0.0	1.0	0.0	1.0	0.0	0.0	0.0	1.0	0.0	1.0	0.0	0.0	0.0	0.0	1.0	1.0	0.0
HDGFRP3	50810	gene_synonym	H. sapiens	50810	H. sapiens	HDGFL3	HDGF like 3	GO:0007026 negative regulation of microtubule depolymerization;GO:0031114 regulation of microtubule depolymerization;GO:0031111 negative regulation of microtubule polymerization or depolymerization		Predicted intracellular proteins	Nucleoplasm (Supported)				0.0	0.0	0.0	0.0	0.0	0.0	0.0	0.0	0.0	0.0	0.0	0.0	0.0	0.0	0.0	0.0	0.0	0.0	0.0	0.0
HES4	57801	symbol	H. sapiens	57801	H. sapiens	HES4	hes family bHLH transcription factor 4	GO:0009952 anterior/posterior pattern specification;GO:0003002 regionalization;GO:0007389 pattern specification process		Predicted intracellular proteins; Transcription factors:Basic domains	Nucleoplasm (Approved); Additional: Cytosol;Vesicles				0.0	0.0	0.0	0.0	0.0	0.0	0.0	0.0	0.0	0.0	0.0	0.0	0.0	0.0	0.0	0.0	0.0	0.0	0.0	0.0
HES6	55502	symbol	H. sapiens	55502	H. sapiens	HES6	hes family bHLH transcription factor 6	GO:0043433 negative regulation of DNA-binding transcription factor activity;GO:0009952 anterior/posterior pattern specification;GO:0003002 regionalization		Predicted intracellular proteins; Transcription factors:Basic domains	Nuclear bodies (Approved); Additional: Cytosol		(M288)PID HES HEY PATHWAY	(M5934)HALLMARK XENOBIOTIC METABOLISM	0.0	0.0	0.0	0.0	0.0	0.0	0.0	0.0	0.0	0.0	0.0	0.0	0.0	0.0	0.0	0.0	0.0	0.0	0.0	0.0
HES7	84667	symbol	H. sapiens	84667	H. sapiens	HES7	hes family bHLH transcription factor 7	GO:0036342 post-anal tail morphogenesis;GO:0001756 somitogenesis;GO:0061053 somite development		Predicted intracellular proteins; Transcription factors:Basic domains; Disease related genes	Nucleoplasm (Approved); Additional: Nucleoli				0.0	0.0	0.0	0.0	0.0	0.0	0.0	0.0	0.0	0.0	0.0	0.0	0.0	0.0	0.0	0.0	0.0	0.0	0.0	0.0
HEXDC	284004	gene_synonym	H. sapiens	284004	H. sapiens	HEXD	hexosaminidase D	GO:0005975 carbohydrate metabolic process;GO:0044238 primary metabolic process;GO:0071704 organic substance metabolic process		Predicted intracellular proteins; ENZYME proteins:Hydrolases; Enzymes	Mitochondria;Nucleoli fibrillar center (Approved)				0.0	0.0	0.0	0.0	0.0	0.0	0.0	0.0	0.0	0.0	0.0	0.0	0.0	0.0	0.0	0.0	0.0	0.0	0.0	0.0
HEY2	23493	symbol	H. sapiens	23493	H. sapiens	HEY2	hes related family bHLH transcription factor with YRPW motif 2	GO:2000723 negative regulation of cardiac vascular smooth muscle cell differentiation;GO:0036304 umbilical cord morphogenesis;GO:0061027 umbilical cord development		Predicted intracellular proteins; Transcription factors:Basic domains	Nuclear bodies (Approved); Additional: Aggresome		(M288)PID HES HEY PATHWAY; (M19)PID P73PATHWAY	(M5919)HALLMARK HEDGEHOG SIGNALING; (M5895)HALLMARK WNT BETA CATENIN SIGNALING	0.0	1.0	0.0	0.0	0.0	0.0	1.0	0.0	0.0	0.0	1.0	0.0	0.0	0.0	0.0	0.0	0.0	1.0	0.0	0.0
HEYL	26508	symbol	H. sapiens	26508	H. sapiens	HEYL	hes related family bHLH transcription factor with YRPW motif like	GO:0072014 proximal tubule development;GO:0061314 Notch signaling involved in heart development;GO:0060766 negative regulation of androgen receptor signaling pathway		Predicted intracellular proteins; Transcription factors:Basic domains	Mitochondria (Approved); Additional: Cytosol			(M5903)HALLMARK NOTCH SIGNALING	0.0	1.0	0.0	0.0	0.0	0.0	0.0	0.0	0.0	0.0	1.0	0.0	0.0	0.0	0.0	0.0	0.0	1.0	0.0	0.0
HGH1	51236	symbol	H. sapiens	51236	H. sapiens	HGH1	HGH1 homolog	GO:0008150 biological_process		Predicted intracellular proteins	Cytosol;Nuclear bodies (Supported); Additional: Nucleoplasm				0.0	0.0	0.0	0.0	0.0	0.0	0.0	0.0	0.0	0.0	0.0	0.0	0.0	0.0	0.0	0.0	0.0	0.0	0.0	0.0
HHEX	3087	symbol	H. sapiens	3087	H. sapiens	HHEX	hematopoietically expressed homeobox	GO:0010621 negative regulation of transcription by transcription factor localization;GO:0010944 negative regulation of transcription by competitive promoter binding;GO:0030948 negative regulation of vascular endothelial growth factor receptor signaling pathway		Predicted intracellular proteins; Transcription factors:Helix-turn-helix domains	Mitochondria;Nucleoplasm (Approved)			(M5938)HALLMARK REACTIVE OXYGEN SPECIES PATHWAY	0.0	1.0	0.0	0.0	0.0	0.0	0.0	1.0	0.0	0.0	0.0	0.0	0.0	0.0	0.0	1.0	0.0	0.0	0.0	0.0
HHIPL1	84439	symbol	H. sapiens	84439	H. sapiens	HHIPL1	HHIP like 1	GO:0006897 endocytosis;GO:0016192 vesicle-mediated transport;GO:0006810 transport		Predicted secreted proteins					0.0	0.0	0.0	0.0	0.0	0.0	0.0	0.0	0.0	0.0	0.0	0.0	0.0	0.0	0.0	0.0	0.0	0.0	0.0	0.0
HIATL2	84278	gene_synonym	H. sapiens	84278	H. sapiens	MFSD14C	major facilitator superfamily domain containing 14C	GO:0055085 transmembrane transport;GO:0006810 transport;GO:0051234 establishment of localization							0.0	0.0	0.0	0.0	0.0	0.0	0.0	0.0	0.0	0.0	0.0	0.0	0.0	0.0	0.0	0.0	0.0	0.0	0.0	0.0
HIC1	3090	symbol	H. sapiens	3090	H. sapiens	HIC1	HIC ZBTB transcriptional repressor 1	GO:0043517 positive regulation of DNA damage response, signal transduction by p53 class mediator;GO:1901798 positive regulation of signal transduction by p53 class mediator;GO:0043516 regulation of DNA damage response, signal transduction by p53 class mediator		Transcription factors:Zinc-coordinating DNA-binding domains; Predicted intracellular proteins			(M40)PID E2F PATHWAY; (M145)PID P53 DOWNSTREAM PATHWAY		0.0	1.0	0.0	0.0	0.0	0.0	0.0	0.0	0.0	0.0	0.0	1.0	0.0	0.0	0.0	1.0	1.0	0.0	0.0	0.0
HIP1R	9026	symbol	H. sapiens	9026	H. sapiens	HIP1R	huntingtin interacting protein 1 related	GO:1905443 regulation of clathrin coat assembly;GO:1905445 positive regulation of clathrin coat assembly;GO:2000588 positive regulation of platelet-derived growth factor receptor-beta signaling pathway		Cancer-related genes:Candidate cancer biomarkers; Predicted intracellular proteins	Cytosol;Plasma membrane (Supported); Additional: Vesicles				0.0	0.0	0.0	1.0	0.0	0.0	0.0	0.0	0.0	0.0	0.0	1.0	0.0	0.0	0.0	0.0	0.0	0.0	0.0	1.0
HIST1H1B	3009	gene_synonym	H. sapiens	3009	H. sapiens	H1-5	H1.5 linker histone, cluster member	GO:0071169 establishment of protein localization to chromatin;GO:0051574 positive regulation of histone H3-K9 methylation;GO:0031936 negative regulation of chromatin silencing		Predicted intracellular proteins	Nucleoplasm (Supported)				1.0	1.0	1.0	1.0	0.0	1.0	0.0	0.0	0.0	0.0	0.0	0.0	0.0	0.0	0.0	0.0	0.0	1.0	0.0	0.0
HIST1H1C	3006	gene_synonym	H. sapiens	3006	H. sapiens	H1-2	H1.2 linker histone, cluster member	GO:0098532 histone H3-K27 trimethylation;GO:0031936 negative regulation of chromatin silencing;GO:0016584 nucleosome positioning		Predicted intracellular proteins	Nucleoli rim;Nucleoplasm (Supported)			(M5939)HALLMARK P53 PATHWAY	1.0	1.0	1.0	0.0	0.0	1.0	0.0	0.0	0.0	0.0	0.0	0.0	0.0	0.0	0.0	0.0	0.0	1.0	0.0	0.0
HIST1H1D	3007	gene_synonym	H. sapiens	3007	H. sapiens	H1-3	H1.3 linker histone, cluster member	GO:0031936 negative regulation of chromatin silencing;GO:0016584 nucleosome positioning;GO:0031935 regulation of chromatin silencing		Predicted intracellular proteins					1.0	1.0	1.0	0.0	0.0	1.0	0.0	0.0	0.0	0.0	0.0	0.0	0.0	0.0	0.0	0.0	0.0	1.0	0.0	0.0
HIST1H1E	3008	gene_synonym	H. sapiens	3008	H. sapiens	H1-4	H1.4 linker histone, cluster member	GO:0031936 negative regulation of chromatin silencing;GO:0016584 nucleosome positioning;GO:0031935 regulation of chromatin silencing		Cancer-related genes:Mutated cancer genes; Predicted intracellular proteins; Disease related genes	Nuclear speckles (Supported)	Copper	(M32)PID HDAC CLASSIII PATHWAY		1.0	1.0	1.0	0.0	0.0	1.0	0.0	0.0	0.0	0.0	0.0	0.0	0.0	0.0	0.0	0.0	0.0	1.0	0.0	0.0
HIST1H2AB	8335	gene_synonym	H. sapiens	8335	H. sapiens	H2AC4	H2A clustered histone 4	GO:0006342 chromatin silencing;GO:0045814 negative regulation of gene expression, epigenetic;GO:0097549 chromatin organization involved in negative regulation of transcription		Predicted intracellular proteins	Nucleoplasm (Approved)				1.0	1.0	1.0	0.0	0.0	0.0	0.0	0.0	0.0	0.0	0.0	0.0	0.0	0.0	0.0	0.0	0.0	1.0	0.0	0.0
HIST1H2AC	8334	gene_synonym	H. sapiens	8334	H. sapiens	H2AC6	H2A clustered histone 6	GO:0006342 chromatin silencing;GO:0045814 negative regulation of gene expression, epigenetic;GO:0097549 chromatin organization involved in negative regulation of transcription		Cancer-related genes:Candidate cancer biomarkers; Predicted intracellular proteins	Nucleoplasm (Approved)				1.0	1.0	1.0	0.0	0.0	0.0	0.0	0.0	0.0	0.0	0.0	0.0	0.0	0.0	0.0	0.0	0.0	0.0	0.0	0.0
HIST1H2AD	3013	gene_synonym	H. sapiens	3013	H. sapiens	H2AC7	H2A clustered histone 7	GO:0006342 chromatin silencing;GO:0045814 negative regulation of gene expression, epigenetic;GO:0097549 chromatin organization involved in negative regulation of transcription		Predicted intracellular proteins	Nucleoplasm (Approved)				1.0	1.0	1.0	0.0	0.0	0.0	0.0	0.0	0.0	0.0	0.0	0.0	0.0	0.0	0.0	0.0	0.0	0.0	0.0	0.0
HIST1H2AE	3012	gene_synonym	H. sapiens	3012	H. sapiens	H2AC8	H2A clustered histone 8	GO:0006342 chromatin silencing;GO:0045814 negative regulation of gene expression, epigenetic;GO:0097549 chromatin organization involved in negative regulation of transcription		Predicted intracellular proteins	Nucleoplasm (Supported)				1.0	1.0	1.0	0.0	0.0	0.0	0.0	0.0	0.0	0.0	0.0	0.0	0.0	0.0	0.0	0.0	0.0	0.0	0.0	0.0
HIST1H2AG	8969	gene_synonym	H. sapiens	8969	H. sapiens	H2AC11	H2A clustered histone 11	GO:0006342 chromatin silencing;GO:0045814 negative regulation of gene expression, epigenetic;GO:0097549 chromatin organization involved in negative regulation of transcription		Predicted intracellular proteins	Nucleoplasm (Approved)				0.0	1.0	1.0	0.0	0.0	0.0	0.0	0.0	0.0	0.0	0.0	0.0	0.0	0.0	0.0	0.0	0.0	0.0	0.0	0.0
HIST1H2AH	85235	gene_synonym	H. sapiens	85235	H. sapiens	H2AC12	H2A clustered histone 12	GO:0006342 chromatin silencing;GO:0045814 negative regulation of gene expression, epigenetic;GO:0097549 chromatin organization involved in negative regulation of transcription		Predicted intracellular proteins	Nucleoplasm (Approved)				0.0	1.0	1.0	0.0	0.0	0.0	0.0	0.0	0.0	0.0	0.0	0.0	0.0	0.0	0.0	0.0	0.0	0.0	0.0	0.0
HIST1H2AI	8329	gene_synonym	H. sapiens	8329	H. sapiens	H2AC13	H2A clustered histone 13	GO:0006342 chromatin silencing;GO:0045814 negative regulation of gene expression, epigenetic;GO:0097549 chromatin organization involved in negative regulation of transcription		Predicted intracellular proteins	Nucleoplasm (Approved)				0.0	1.0	1.0	0.0	0.0	0.0	0.0	0.0	0.0	0.0	0.0	0.0	0.0	0.0	0.0	0.0	0.0	0.0	0.0	0.0
HIST1H2AJ	8331	gene_synonym	H. sapiens	8331	H. sapiens	H2AC14	H2A clustered histone 14			Predicted intracellular proteins	Nucleoplasm (Approved)				1.0	1.0	1.0	0.0	0.0	0.0	0.0	0.0	0.0	0.0	0.0	0.0	0.0	0.0	0.0	0.0	0.0	0.0	0.0	0.0
HIST1H2AK	8330	gene_synonym	H. sapiens	8330	H. sapiens	H2AC15	H2A clustered histone 15	GO:0006342 chromatin silencing;GO:0045814 negative regulation of gene expression, epigenetic;GO:0097549 chromatin organization involved in negative regulation of transcription		Predicted intracellular proteins	Nucleoplasm (Approved)				0.0	1.0	1.0	0.0	0.0	0.0	0.0	0.0	0.0	0.0	0.0	0.0	0.0	0.0	0.0	0.0	0.0	0.0	0.0	0.0
HIST1H2AL	8332	gene_synonym	H. sapiens	8332	H. sapiens	H2AC16	H2A clustered histone 16	GO:0006342 chromatin silencing;GO:0045814 negative regulation of gene expression, epigenetic;GO:0097549 chromatin organization involved in negative regulation of transcription		Predicted intracellular proteins	Nucleoplasm (Approved)				0.0	1.0	1.0	0.0	0.0	0.0	0.0	0.0	0.0	0.0	0.0	0.0	0.0	0.0	0.0	0.0	0.0	0.0	0.0	0.0
HIST1H2AM	8336	gene_synonym	H. sapiens	8336	H. sapiens	H2AC17	H2A clustered histone 17	GO:0006342 chromatin silencing;GO:0045814 negative regulation of gene expression, epigenetic;GO:0097549 chromatin organization involved in negative regulation of transcription		Predicted intracellular proteins	Nucleoplasm (Approved)				0.0	1.0	1.0	0.0	0.0	0.0	0.0	0.0	0.0	0.0	0.0	0.0	0.0	0.0	0.0	0.0	0.0	0.0	0.0	0.0
HIST1H2BB	3018	gene_synonym	H. sapiens	3018	H. sapiens	H2BC3	H2B clustered histone 3	GO:0006334 nucleosome assembly;GO:0034728 nucleosome organization;GO:0031497 chromatin assembly		Predicted intracellular proteins	Nucleoplasm (Approved); Additional: Cytosol			(M5953)HALLMARK KRAS SIGNALING UP	1.0	1.0	1.0	0.0	0.0	0.0	0.0	0.0	0.0	0.0	0.0	0.0	0.0	0.0	1.0	0.0	0.0	0.0	0.0	0.0
HIST1H2BC	3017	gene_synonym	H. sapiens	3017	H. sapiens	H2BC5	H2B clustered histone 5	GO:0006334 nucleosome assembly;GO:0034728 nucleosome organization;GO:0031497 chromatin assembly		Predicted intracellular proteins	Nucleoplasm (Approved); Additional: Cytosol				1.0	1.0	1.0	0.0	0.0	0.0	0.0	0.0	0.0	0.0	0.0	0.0	0.0	0.0	1.0	0.0	0.0	0.0	0.0	0.0
HIST1H2BD	3017	gene_synonym	H. sapiens	3017	H. sapiens	H2BC5	H2B clustered histone 5	GO:0006334 nucleosome assembly;GO:0034728 nucleosome organization;GO:0031497 chromatin assembly		Predicted intracellular proteins	Nucleoplasm (Approved); Additional: Cytosol				1.0	1.0	1.0	0.0	0.0	0.0	0.0	0.0	0.0	0.0	0.0	0.0	0.0	0.0	1.0	0.0	0.0	0.0	0.0	0.0
HIST1H2BE	3017	gene_synonym	H. sapiens	3017	H. sapiens	H2BC5	H2B clustered histone 5	GO:0006334 nucleosome assembly;GO:0034728 nucleosome organization;GO:0031497 chromatin assembly		Predicted intracellular proteins	Nucleoplasm (Approved); Additional: Cytosol				1.0	1.0	1.0	0.0	0.0	0.0	0.0	0.0	0.0	0.0	0.0	0.0	0.0	0.0	1.0	0.0	0.0	0.0	0.0	0.0
HIST1H2BF	3017	gene_synonym	H. sapiens	3017	H. sapiens	H2BC5	H2B clustered histone 5	GO:0006334 nucleosome assembly;GO:0034728 nucleosome organization;GO:0031497 chromatin assembly		Predicted intracellular proteins	Nucleoplasm (Approved); Additional: Cytosol				1.0	1.0	1.0	0.0	0.0	0.0	0.0	0.0	0.0	0.0	0.0	0.0	0.0	0.0	1.0	0.0	0.0	0.0	0.0	0.0
HIST1H2BG	3017	gene_synonym	H. sapiens	3017	H. sapiens	H2BC5	H2B clustered histone 5	GO:0006334 nucleosome assembly;GO:0034728 nucleosome organization;GO:0031497 chromatin assembly		Predicted intracellular proteins	Nucleoplasm (Approved); Additional: Cytosol				1.0	1.0	1.0	0.0	0.0	0.0	0.0	0.0	0.0	0.0	0.0	0.0	0.0	0.0	1.0	0.0	0.0	0.0	0.0	0.0
HIST1H2BH	8345	gene_synonym	H. sapiens	8345	H. sapiens	H2BC9	H2B clustered histone 9	GO:0006334 nucleosome assembly;GO:0034728 nucleosome organization;GO:0031497 chromatin assembly		Predicted intracellular proteins	Nucleoplasm (Approved); Additional: Cytosol				1.0	1.0	1.0	0.0	0.0	0.0	0.0	0.0	0.0	0.0	0.0	0.0	0.0	0.0	1.0	0.0	0.0	0.0	0.0	0.0
HIST1H2BI	3017	gene_synonym	H. sapiens	3017	H. sapiens	H2BC5	H2B clustered histone 5	GO:0006334 nucleosome assembly;GO:0034728 nucleosome organization;GO:0031497 chromatin assembly		Predicted intracellular proteins	Nucleoplasm (Approved); Additional: Cytosol				1.0	1.0	1.0	0.0	0.0	0.0	0.0	0.0	0.0	0.0	0.0	0.0	0.0	0.0	1.0	0.0	0.0	0.0	0.0	0.0
HIST1H2BJ	8970	gene_synonym	H. sapiens	8970	H. sapiens	H2BC11	H2B clustered histone 11	GO:0010804 negative regulation of tumor necrosis factor-mediated signaling pathway;GO:0002227 innate immune response in mucosa;GO:0002385 mucosal immune response		Predicted intracellular proteins	Nucleoplasm (Approved); Additional: Cytosol				1.0	1.0	1.0	0.0	0.0	0.0	0.0	0.0	0.0	0.0	0.0	0.0	0.0	0.0	1.0	0.0	0.0	0.0	0.0	0.0
HIST1H2BK	85236	gene_synonym	H. sapiens	85236	H. sapiens	H2BC12	H2B clustered histone 12	GO:0002227 innate immune response in mucosa;GO:0002385 mucosal immune response;GO:0002251 organ or tissue specific immune response		Predicted intracellular proteins	Nucleoplasm (Approved); Additional: Cytosol			(M5901)HALLMARK G2M CHECKPOINT	1.0	1.0	1.0	0.0	0.0	0.0	0.0	0.0	0.0	0.0	0.0	0.0	0.0	0.0	1.0	0.0	0.0	0.0	0.0	0.0
HIST1H2BL	8340	gene_synonym	H. sapiens	8340	H. sapiens	H2BC13	H2B clustered histone 13	GO:0006334 nucleosome assembly;GO:0034728 nucleosome organization;GO:0031497 chromatin assembly		Predicted intracellular proteins	Nucleoplasm (Approved); Additional: Cytosol				1.0	1.0	1.0	0.0	0.0	0.0	0.0	0.0	0.0	0.0	0.0	0.0	0.0	0.0	1.0	0.0	0.0	0.0	0.0	0.0
HIST1H2BM	8342	gene_synonym	H. sapiens	8342	H. sapiens	H2BC14	H2B clustered histone 14	GO:0006334 nucleosome assembly;GO:0034728 nucleosome organization;GO:0031497 chromatin assembly		Predicted intracellular proteins	Nucleoplasm (Approved); Additional: Cytosol				1.0	1.0	1.0	0.0	0.0	0.0	0.0	0.0	0.0	0.0	0.0	0.0	0.0	0.0	1.0	0.0	0.0	0.0	0.0	0.0
HIST1H2BN	8341	gene_synonym	H. sapiens	8341	H. sapiens	H2BC15	H2B clustered histone 15	GO:0006334 nucleosome assembly;GO:0034728 nucleosome organization;GO:0031497 chromatin assembly		Predicted intracellular proteins	Nucleoplasm (Approved); Additional: Cytosol				1.0	1.0	1.0	0.0	0.0	0.0	0.0	0.0	0.0	0.0	0.0	0.0	0.0	0.0	1.0	0.0	0.0	0.0	0.0	0.0
HIST1H2BO	8348	gene_synonym	H. sapiens	8348	H. sapiens	H2BC17	H2B clustered histone 17	GO:0006334 nucleosome assembly;GO:0034728 nucleosome organization;GO:0031497 chromatin assembly		Predicted intracellular proteins	Nucleoplasm (Approved); Additional: Cytosol				1.0	1.0	1.0	0.0	0.0	0.0	0.0	0.0	0.0	0.0	0.0	0.0	0.0	0.0	1.0	0.0	0.0	0.0	0.0	0.0
HIST1H3A	8350	gene_synonym	H. sapiens	8350	H. sapiens	H3C1	H3 clustered histone 1	GO:0006335 DNA replication-dependent nucleosome assembly;GO:0034723 DNA replication-dependent nucleosome organization;GO:0060968 regulation of gene silencing		Predicted intracellular proteins; Disease related genes					1.0	1.0	0.0	0.0	0.0	1.0	0.0	1.0	0.0	0.0	0.0	0.0	0.0	0.0	0.0	0.0	0.0	0.0	0.0	0.0
HIST1H3B	8358	gene_synonym	H. sapiens	8358	H. sapiens	H3C2	H3 clustered histone 2	GO:0006335 DNA replication-dependent nucleosome assembly;GO:0034723 DNA replication-dependent nucleosome organization;GO:0060968 regulation of gene silencing							1.0	1.0	0.0	0.0	0.0	1.0	0.0	1.0	0.0	0.0	0.0	0.0	0.0	0.0	0.0	0.0	0.0	0.0	0.0	0.0
HIST1H3C	8352	gene_synonym	H. sapiens	8352	H. sapiens	H3C3	H3 clustered histone 3	GO:0006335 DNA replication-dependent nucleosome assembly;GO:0034723 DNA replication-dependent nucleosome organization;GO:0060968 regulation of gene silencing							1.0	1.0	0.0	0.0	0.0	1.0	0.0	1.0	0.0	0.0	0.0	0.0	0.0	0.0	0.0	0.0	0.0	0.0	0.0	0.0
HIST1H3D	8351	gene_synonym	H. sapiens	8351	H. sapiens	H3C4	H3 clustered histone 4	GO:0006335 DNA replication-dependent nucleosome assembly;GO:0034723 DNA replication-dependent nucleosome organization;GO:0060968 regulation of gene silencing		Predicted intracellular proteins; Disease related genes					1.0	1.0	0.0	0.0	0.0	1.0	0.0	1.0	0.0	0.0	0.0	0.0	0.0	0.0	0.0	0.0	0.0	0.0	0.0	0.0
HIST1H3E	8353	gene_synonym	H. sapiens	8353	H. sapiens	H3C6	H3 clustered histone 6	GO:0006335 DNA replication-dependent nucleosome assembly;GO:0034723 DNA replication-dependent nucleosome organization;GO:0060968 regulation of gene silencing		Predicted intracellular proteins; Disease related genes					1.0	1.0	0.0	0.0	0.0	1.0	0.0	1.0	0.0	0.0	0.0	0.0	0.0	0.0	0.0	0.0	0.0	0.0	0.0	0.0
HIST1H3F	8968	gene_synonym	H. sapiens	8968	H. sapiens	H3C7	H3 clustered histone 7	GO:0006335 DNA replication-dependent nucleosome assembly;GO:0034723 DNA replication-dependent nucleosome organization;GO:0060968 regulation of gene silencing		Predicted intracellular proteins; Disease related genes					1.0	1.0	0.0	0.0	0.0	1.0	0.0	1.0	0.0	0.0	0.0	0.0	0.0	0.0	0.0	0.0	0.0	0.0	0.0	0.0
HIST1H3G	8355	gene_synonym	H. sapiens	8355	H. sapiens	H3C8	H3 clustered histone 8	GO:0006335 DNA replication-dependent nucleosome assembly;GO:0034723 DNA replication-dependent nucleosome organization;GO:0060968 regulation of gene silencing		Predicted intracellular proteins; Disease related genes					1.0	1.0	0.0	0.0	0.0	1.0	0.0	1.0	0.0	0.0	0.0	0.0	0.0	0.0	0.0	0.0	0.0	0.0	0.0	0.0
HIST1H3H	8357	gene_synonym	H. sapiens	8357	H. sapiens	H3C10	H3 clustered histone 10	GO:0006335 DNA replication-dependent nucleosome assembly;GO:0034723 DNA replication-dependent nucleosome organization;GO:0060968 regulation of gene silencing		Predicted intracellular proteins; Disease related genes					1.0	1.0	0.0	0.0	0.0	1.0	0.0	1.0	0.0	0.0	0.0	0.0	0.0	0.0	0.0	0.0	0.0	0.0	0.0	0.0
HIST1H3I	8354	gene_synonym	H. sapiens	8354	H. sapiens	H3C11	H3 clustered histone 11	GO:0006335 DNA replication-dependent nucleosome assembly;GO:0034723 DNA replication-dependent nucleosome organization;GO:0060968 regulation of gene silencing		Predicted intracellular proteins; Disease related genes					1.0	1.0	0.0	0.0	0.0	1.0	0.0	1.0	0.0	0.0	0.0	0.0	0.0	0.0	0.0	0.0	0.0	0.0	0.0	0.0
HIST1H3J	8356	gene_synonym	H. sapiens	8356	H. sapiens	H3C12	H3 clustered histone 12	GO:0006335 DNA replication-dependent nucleosome assembly;GO:0034723 DNA replication-dependent nucleosome organization;GO:0060968 regulation of gene silencing		Predicted intracellular proteins; Disease related genes					1.0	1.0	0.0	0.0	0.0	1.0	0.0	1.0	0.0	0.0	0.0	0.0	0.0	0.0	0.0	0.0	0.0	0.0	0.0	0.0
HIST1H4B	8366	gene_synonym	H. sapiens	8366	H. sapiens	H4C2	H4 clustered histone 2	GO:0045653 negative regulation of megakaryocyte differentiation;GO:0006335 DNA replication-dependent nucleosome assembly;GO:0034723 DNA replication-dependent nucleosome organization		Predicted intracellular proteins; Disease related genes					1.0	1.0	0.0	0.0	0.0	0.0	1.0	0.0	0.0	0.0	0.0	0.0	0.0	0.0	0.0	0.0	0.0	0.0	0.0	0.0
HIST1H4C	8364	gene_synonym	H. sapiens	8364	H. sapiens	H4C3	H4 clustered histone 3	GO:0045653 negative regulation of megakaryocyte differentiation;GO:0006335 DNA replication-dependent nucleosome assembly;GO:0034723 DNA replication-dependent nucleosome organization		Predicted intracellular proteins; Disease related genes				(M5945)HALLMARK HEME METABOLISM	1.0	1.0	0.0	0.0	0.0	0.0	1.0	0.0	0.0	0.0	0.0	0.0	0.0	0.0	0.0	0.0	0.0	0.0	0.0	0.0
HIST1H4D	8360	gene_synonym	H. sapiens	8360	H. sapiens	H4C4	H4 clustered histone 4	GO:0045653 negative regulation of megakaryocyte differentiation;GO:0006335 DNA replication-dependent nucleosome assembly;GO:0034723 DNA replication-dependent nucleosome organization		Predicted intracellular proteins; Disease related genes					1.0	1.0	0.0	0.0	0.0	0.0	1.0	0.0	0.0	0.0	0.0	0.0	0.0	0.0	0.0	0.0	0.0	0.0	0.0	0.0
HIST1H4E	8367	gene_synonym	H. sapiens	8367	H. sapiens	H4C5	H4 clustered histone 5	GO:0045653 negative regulation of megakaryocyte differentiation;GO:0006335 DNA replication-dependent nucleosome assembly;GO:0034723 DNA replication-dependent nucleosome organization		Cancer-related genes:Mutated cancer genes; Predicted intracellular proteins; Disease related genes					1.0	1.0	0.0	0.0	0.0	0.0	1.0	0.0	0.0	0.0	0.0	0.0	0.0	0.0	0.0	0.0	0.0	0.0	0.0	0.0
HIST1H4F	8361	gene_synonym	H. sapiens	8361	H. sapiens	H4C6	H4 clustered histone 6	GO:0045653 negative regulation of megakaryocyte differentiation;GO:0006335 DNA replication-dependent nucleosome assembly;GO:0034723 DNA replication-dependent nucleosome organization		Predicted intracellular proteins; Disease related genes					1.0	1.0	0.0	0.0	0.0	0.0	1.0	0.0	0.0	0.0	0.0	0.0	0.0	0.0	0.0	0.0	0.0	0.0	0.0	0.0
HIST1H4H	8365	gene_synonym	H. sapiens	8365	H. sapiens	H4C8	H4 clustered histone 8	GO:0045653 negative regulation of megakaryocyte differentiation;GO:0006335 DNA replication-dependent nucleosome assembly;GO:0034723 DNA replication-dependent nucleosome organization		Predicted intracellular proteins; Disease related genes					1.0	1.0	0.0	0.0	0.0	0.0	1.0	0.0	0.0	0.0	0.0	0.0	0.0	0.0	0.0	0.0	0.0	0.0	0.0	0.0
HIST1H4I	8294	gene_synonym	H. sapiens	8294	H. sapiens	H4C9	H4 clustered histone 9	GO:0045653 negative regulation of megakaryocyte differentiation;GO:0006335 DNA replication-dependent nucleosome assembly;GO:0034723 DNA replication-dependent nucleosome organization		Predicted intracellular proteins; Disease related genes; Cancer-related genes			(M32)PID HDAC CLASSIII PATHWAY		1.0	1.0	0.0	0.0	0.0	0.0	1.0	0.0	0.0	0.0	0.0	0.0	0.0	0.0	0.0	0.0	0.0	0.0	0.0	0.0
HIST1H4J	8363	gene_synonym	H. sapiens	8363	H. sapiens	H4C11	H4 clustered histone 11	GO:0045653 negative regulation of megakaryocyte differentiation;GO:0006335 DNA replication-dependent nucleosome assembly;GO:0034723 DNA replication-dependent nucleosome organization		Predicted intracellular proteins; Disease related genes					1.0	1.0	0.0	0.0	0.0	0.0	1.0	0.0	0.0	0.0	0.0	0.0	0.0	0.0	0.0	0.0	0.0	0.0	0.0	0.0
HIST1H4K	8362	gene_synonym	H. sapiens	8362	H. sapiens	H4C12	H4 clustered histone 12	GO:0045653 negative regulation of megakaryocyte differentiation;GO:0006335 DNA replication-dependent nucleosome assembly;GO:0034723 DNA replication-dependent nucleosome organization		Predicted intracellular proteins; Disease related genes					1.0	1.0	0.0	0.0	0.0	0.0	1.0	0.0	0.0	0.0	0.0	0.0	0.0	0.0	0.0	0.0	0.0	0.0	0.0	0.0
HIST1H4L	8368	gene_synonym	H. sapiens	8368	H. sapiens	H4C13	H4 clustered histone 13	GO:0045653 negative regulation of megakaryocyte differentiation;GO:0006335 DNA replication-dependent nucleosome assembly;GO:0034723 DNA replication-dependent nucleosome organization		Predicted intracellular proteins; Disease related genes					1.0	1.0	0.0	0.0	0.0	0.0	1.0	0.0	0.0	0.0	0.0	0.0	0.0	0.0	0.0	0.0	0.0	0.0	0.0	0.0
HIST2H2AB	317772	gene_synonym	H. sapiens	317772	H. sapiens	H2AC21	H2A clustered histone 21	GO:0006342 chromatin silencing;GO:0045814 negative regulation of gene expression, epigenetic;GO:0097549 chromatin organization involved in negative regulation of transcription		Predicted intracellular proteins	Nucleoplasm (Supported)				0.0	1.0	1.0	0.0	0.0	0.0	0.0	0.0	0.0	0.0	0.0	0.0	0.0	0.0	0.0	0.0	0.0	0.0	0.0	0.0
HIST2H2AC	8338	gene_synonym	H. sapiens	8338	H. sapiens	H2AC20	H2A clustered histone 20	GO:0006342 chromatin silencing;GO:0045814 negative regulation of gene expression, epigenetic;GO:0097549 chromatin organization involved in negative regulation of transcription		Predicted intracellular proteins	Nucleoplasm (Approved)				1.0	1.0	1.0	0.0	0.0	0.0	0.0	0.0	0.0	0.0	0.0	0.0	0.0	0.0	0.0	0.0	0.0	0.0	0.0	0.0
HIST2H2BA	337875	gene_synonym	H. sapiens	337875	H. sapiens	H2BP1	H2B histone pseudogene 1								0.0	0.0	0.0	0.0	0.0	0.0	0.0	0.0	0.0	0.0	0.0	0.0	0.0	0.0	0.0	0.0	0.0	0.0	0.0	0.0
HIST2H2BE	8349	gene_synonym	H. sapiens	8349	H. sapiens	H2BC21	H2B clustered histone 21	GO:0002227 innate immune response in mucosa;GO:0002385 mucosal immune response;GO:0002251 organ or tissue specific immune response		Predicted intracellular proteins	Nucleoplasm (Approved); Additional: Cytosol				1.0	1.0	1.0	0.0	0.0	0.0	0.0	0.0	0.0	0.0	0.0	0.0	0.0	0.0	0.0	0.0	0.0	0.0	0.0	0.0
HIST2H2BF	440689	gene_synonym	H. sapiens	440689	H. sapiens	H2BC18	H2B clustered histone 18	GO:0006334 nucleosome assembly;GO:0034728 nucleosome organization;GO:0031497 chromatin assembly		Predicted intracellular proteins	Nucleoplasm (Approved); Additional: Cytosol				0.0	1.0	1.0	0.0	0.0	0.0	0.0	0.0	0.0	0.0	0.0	0.0	0.0	0.0	0.0	0.0	0.0	0.0	0.0	0.0
HIST2H3D	653604	gene_synonym	H. sapiens	653604	H. sapiens	H3C13	H3 clustered histone 13	GO:0006334 nucleosome assembly;GO:0034728 nucleosome organization;GO:0031497 chromatin assembly		Predicted intracellular proteins					1.0	1.0	0.0	0.0	0.0	0.0	0.0	1.0	0.0	0.0	0.0	0.0	0.0	0.0	0.0	0.0	0.0	0.0	0.0	0.0
HIST3H2A	92815	gene_synonym	H. sapiens	92815	H. sapiens	H2AW	H2A.W histone	GO:0070914 UV-damage excision repair;GO:0006337 nucleosome disassembly;GO:0031498 chromatin disassembly		Predicted intracellular proteins	Nucleoplasm (Approved)			(M5939)HALLMARK P53 PATHWAY	0.0	1.0	1.0	0.0	0.0	0.0	0.0	0.0	0.0	0.0	0.0	0.0	0.0	0.0	0.0	0.0	0.0	0.0	0.0	0.0
HIST4H4	121504	gene_synonym	H. sapiens	121504	H. sapiens	H4-16	H4 histone 16	GO:0045653 negative regulation of megakaryocyte differentiation;GO:0006335 DNA replication-dependent nucleosome assembly;GO:0034723 DNA replication-dependent nucleosome organization		Predicted intracellular proteins; Disease related genes	Nucleoplasm (Supported)				1.0	1.0	0.0	0.0	0.0	0.0	1.0	0.0	0.0	0.0	0.0	0.0	0.0	0.0	0.0	0.0	0.0	0.0	0.0	0.0
HMGN1	3150	symbol	H. sapiens	3150	H. sapiens	HMGN1	high mobility group nucleosome binding domain 1	GO:0048597 post-embryonic camera-type eye morphogenesis;GO:1901664 regulation of NAD+ ADP-ribosyltransferase activity;GO:1901666 positive regulation of NAD+ ADP-ribosyltransferase activity		Predicted intracellular proteins	Nucleoplasm (Supported)				0.0	1.0	0.0	0.0	0.0	0.0	0.0	0.0	0.0	0.0	0.0	0.0	0.0	0.0	0.0	0.0	0.0	0.0	1.0	0.0
HMX3	340784	symbol	H. sapiens	340784	H. sapiens	HMX3	H6 family homeobox 3	GO:0050885 neuromuscular process controlling balance;GO:0007566 embryo implantation;GO:0060135 maternal process involved in female pregnancy		Predicted intracellular proteins; Transcription factors:Helix-turn-helix domains	Nucleoplasm (Approved); Additional: Centriolar satellite				0.0	0.0	0.0	0.0	0.0	0.0	0.0	0.0	0.0	0.0	0.0	0.0	0.0	0.0	0.0	0.0	0.0	0.0	0.0	0.0
HNRNPA1	3178	symbol	H. sapiens	3178	H. sapiens	HNRNPA1	heterogeneous nuclear ribonucleoprotein A1	GO:1903936 cellular response to sodium arsenite;GO:1903935 response to sodium arsenite;GO:1902075 cellular response to salt		Predicted intracellular proteins; Disease related genes	Nucleoplasm (Enhanced)		(M58)PID AR PATHWAY	(M5926)HALLMARK MYC TARGETS V1	1.0	1.0	0.0	0.0	0.0	0.0	0.0	0.0	0.0	0.0	0.0	0.0	0.0	0.0	0.0	0.0	0.0	0.0	0.0	0.0
HNRNPH2	3188	symbol	H. sapiens	3188	H. sapiens	HNRNPH2	heterogeneous nuclear ribonucleoprotein H2	GO:0043484 regulation of RNA splicing;GO:0008380 RNA splicing;GO:0006396 RNA processing		Predicted intracellular proteins; Disease related genes	Nucleoplasm (Enhanced)				1.0	0.0	0.0	0.0	0.0	0.0	0.0	0.0	0.0	0.0	0.0	0.0	0.0	0.0	0.0	0.0	0.0	0.0	0.0	0.0
HNRNPL	3191	symbol	H. sapiens	3191	H. sapiens	HNRNPL	heterogeneous nuclear ribonucleoprotein L	GO:0000381 regulation of alternative mRNA splicing, via spliceosome;GO:0000380 alternative mRNA splicing, via spliceosome;GO:0048024 regulation of mRNA splicing, via spliceosome		Predicted intracellular proteins	Nucleoplasm (Enhanced)	Copper			1.0	0.0	0.0	0.0	0.0	0.0	0.0	0.0	0.0	0.0	0.0	0.0	0.0	0.0	0.0	0.0	0.0	0.0	0.0	0.0
HOOK2	29911	symbol	H. sapiens	29911	H. sapiens	HOOK2	hook microtubule tethering protein 2	GO:1905719 protein localization to perinuclear region of cytoplasm;GO:0045022 early endosome to late endosome transport;GO:0098927 vesicle-mediated transport between endosomal compartments		Predicted intracellular proteins	Cytosol;Vesicles (Supported)				0.0	0.0	0.0	0.0	0.0	0.0	0.0	0.0	0.0	0.0	0.0	0.0	0.0	0.0	0.0	0.0	0.0	0.0	0.0	0.0
HOXD-AS2	100506783	symbol	H. sapiens	100506783	H. sapiens	HOXD-AS2	HOXD cluster antisense RNA 2								0.0	0.0	0.0	0.0	0.0	0.0	0.0	0.0	0.0	0.0	0.0	0.0	0.0	0.0	0.0	0.0	0.0	0.0	0.0	0.0
HPS6	79803	symbol	H. sapiens	79803	H. sapiens	HPS6	HPS6 biogenesis of lysosomal organelles complex 2 subunit 3	GO:0030318 melanocyte differentiation;GO:0050931 pigment cell differentiation;GO:0048066 developmental pigmentation		Predicted intracellular proteins; Disease related genes					0.0	0.0	0.0	0.0	0.0	0.0	0.0	0.0	0.0	0.0	0.0	0.0	0.0	0.0	0.0	0.0	0.0	0.0	0.0	0.0
HRAT92	441307	symbol	H. sapiens	441307	H. sapiens	HRAT92	heart tissue-associated transcript 92								0.0	0.0	0.0	0.0	0.0	0.0	0.0	0.0	0.0	0.0	0.0	0.0	0.0	0.0	0.0	0.0	0.0	0.0	0.0	0.0
HSD17B10	3028	symbol	H. sapiens	3028	H. sapiens	HSD17B10	hydroxysteroid 17-beta dehydrogenase 10	GO:0062173 brexanolone metabolic process;GO:0070901 mitochondrial tRNA methylation;GO:0097745 mitochondrial tRNA 5'-end processing		Predicted intracellular proteins; Enzymes; ENZYME proteins:Oxidoreductases; Disease related genes; Potential drug targets		NADH; 1-Azepan-1-Yl-2-Phenyl-2-(4-Thioxo-1,4-Dihydro-Pyrazolo[3,4-D]Pyrimidin-5-Yl)Ethanone Adduct; Omega-3-carboxylic acids		(M5935)HALLMARK FATTY ACID METABOLISM; (M5936)HALLMARK OXIDATIVE PHOSPHORYLATION	1.0	0.0	0.0	1.0	1.0	0.0	0.0	0.0	0.0	1.0	0.0	0.0	0.0	0.0	0.0	0.0	0.0	0.0	0.0	0.0
HSF1	3297	symbol	H. sapiens	3297	H. sapiens	HSF1	heat shock transcription factor 1	GO:0061408 positive regulation of transcription from RNA polymerase II promoter in response to heat stress;GO:1904843 cellular response to nitroglycerin;GO:0072737 response to diamide		Cancer-related genes:Candidate cancer biomarkers; Predicted intracellular proteins; Transcription factors:Helix-turn-helix domains	Nucleoplasm (Supported); Additional: Cytosol	Bimoclomol	(M19)PID P73PATHWAY		1.0	0.0	0.0	0.0	0.0	0.0	1.0	0.0	0.0	0.0	0.0	0.0	0.0	0.0	0.0	0.0	1.0	0.0	0.0	1.0
HSP90AB4P	664618	symbol	H. sapiens	664618	H. sapiens	HSP90AB4P	heat shock protein 90 alpha family class B member 4, pseudogene	GO:0034605 cellular response to heat;GO:0009408 response to heat;GO:0009266 response to temperature stimulus							0.0	0.0	0.0	0.0	0.0	0.0	0.0	0.0	0.0	0.0	0.0	0.0	0.0	0.0	0.0	0.0	0.0	0.0	0.0	0.0
HSPA1B	3304	symbol	H. sapiens	3304	H. sapiens	HSPA1B	heat shock protein family A (Hsp70) member 1B	GO:0070434 positive regulation of nucleotide-binding oligomerization domain containing 2 signaling pathway;GO:0010286 heat acclimation;GO:0070370 cellular heat acclimation		Predicted intracellular proteins	Cytosol;Vesicles (Approved); Additional: Nucleoplasm				1.0	0.0	0.0	0.0	1.0	0.0	1.0	0.0	0.0	0.0	0.0	1.0	0.0	1.0	0.0	0.0	0.0	1.0	1.0	1.0
HTR1D	3352	symbol	H. sapiens	3352	H. sapiens	HTR1D	5-hydroxytryptamine receptor 1D	GO:0014827 intestine smooth muscle contraction;GO:0007198 adenylate cyclase-inhibiting serotonin receptor signaling pathway;GO:0014831 gastro-intestinal system smooth muscle contraction		G-protein coupled receptors:Serotonin receptors; FDA approved drug targets:Small molecule drugs; G-protein coupled receptors:GPCRs excl olfactory receptors		Eletriptan; Ziprasidone; Cabergoline; Zolmitriptan; Dihydroergotamine; Amitriptyline; Clozapine; Loxapine; Lisuride; Sumatriptan; Ergotamine; Apomorphine; Trimipramine; Risperidone; Almotriptan; Naratriptan; Rizatriptan; Frovatriptan; Pergolide; Bromocriptine; Quetiapine; Aripiprazole; Paliperidone; Yohimbine; Lofexidine; NXN-188; Pizotifen; Aripiprazole lauroxil		(M5956)HALLMARK KRAS SIGNALING DN	0.0	0.0	0.0	0.0	0.0	0.0	0.0	0.0	0.0	0.0	0.0	0.0	0.0	0.0	0.0	0.0	0.0	0.0	0.0	0.0
HYMAI	57061	symbol	H. sapiens	57061	H. sapiens	HYMAI	hydatidiform mole associated and imprinted								0.0	0.0	0.0	0.0	0.0	0.0	0.0	0.0	0.0	0.0	0.0	0.0	0.0	0.0	0.0	0.0	0.0	0.0	0.0	0.0
HYOU1	10525	symbol	H. sapiens	10525	H. sapiens	HYOU1	hypoxia up-regulated 1	GO:0036483 neuron intrinsic apoptotic signaling pathway in response to endoplasmic reticulum stress;GO:1903381 regulation of endoplasmic reticulum stress-induced neuron intrinsic apoptotic signaling pathway;GO:1903382 negative regulation of endoplasmic reticulum stress-induced neuron intrinsic apoptotic signaling pathway		Predicted intracellular proteins				(M5922)HALLMARK UNFOLDED PROTEIN RESPONSE	1.0	0.0	0.0	0.0	0.0	0.0	0.0	0.0	0.0	0.0	0.0	1.0	1.0	0.0	0.0	0.0	1.0	0.0	0.0	0.0
IBA57	200205	symbol	H. sapiens	200205	H. sapiens	IBA57	iron-sulfur cluster assembly factor IBA57	GO:0016226 iron-sulfur cluster assembly;GO:0031163 metallo-sulfur cluster assembly;GO:0006783 heme biosynthetic process		Predicted intracellular proteins; Disease related genes	Mitochondria (Supported)				0.0	0.0	0.0	0.0	0.0	0.0	0.0	0.0	0.0	0.0	0.0	0.0	0.0	0.0	0.0	0.0	0.0	0.0	0.0	0.0
ICAM1	3383	symbol	H. sapiens	3383	H. sapiens	ICAM1	intercellular adhesion molecule 1	GO:0010477 response to sulfur dioxide;GO:0097368 establishment of Sertoli cell barrier;GO:0046813 receptor-mediated virion attachment to host cell		Cancer-related genes:Candidate cancer biomarkers; CD markers; Candidate cardiovascular disease genes; Predicted intracellular proteins; FDA approved drug targets:Small molecule drugs	Cytosol;Plasma membrane (Approved)	Natalizumab; Hyaluronic acid; Nafamostat	(M169)PID INTEGRIN2 PATHWAY; (M159)PID AMB2 NEUTROPHILS PATHWAY; (M99)PID TXA2PATHWAY	(M5941)HALLMARK UV RESPONSE UP; (M5890)HALLMARK TNFA SIGNALING VIA NFKB; (M5913)HALLMARK INTERFERON GAMMA RESPONSE	0.0	0.0	0.0	0.0	0.0	0.0	0.0	0.0	0.0	0.0	0.0	1.0	1.0	0.0	0.0	0.0	0.0	0.0	1.0	0.0
IDUA	3425	symbol	H. sapiens	3425	H. sapiens	IDUA	alpha-L-iduronidase	GO:0030209 dermatan sulfate catabolic process;GO:0030211 heparin catabolic process;GO:0030207 chondroitin sulfate catabolic process		Predicted intracellular proteins; ENZYME proteins:Hydrolases; Enzymes; Disease related genes; Potential drug targets	Vesicles (Supported)			(M5937)HALLMARK GLYCOLYSIS; (M5956)HALLMARK KRAS SIGNALING DN	0.0	0.0	0.0	0.0	0.0	0.0	0.0	0.0	0.0	0.0	0.0	0.0	0.0	0.0	0.0	0.0	0.0	0.0	0.0	0.0
IER2	9592	symbol	H. sapiens	9592	H. sapiens	IER2	immediate early response 2	GO:0071774 response to fibroblast growth factor;GO:0070848 response to growth factor;GO:0045944 positive regulation of transcription by RNA polymerase II		Predicted intracellular proteins	Nucleoplasm (Enhanced)			(M5890)HALLMARK TNFA SIGNALING VIA NFKB	0.0	0.0	0.0	0.0	0.0	0.0	0.0	0.0	0.0	0.0	0.0	0.0	0.0	0.0	0.0	0.0	0.0	0.0	0.0	0.0
IER3	8870	symbol	H. sapiens	8870	H. sapiens	IER3	immediate early response 3	GO:2001020 regulation of response to DNA damage stimulus;GO:0080135 regulation of cellular response to stress;GO:0006974 cellular response to DNA damage stimulus		Predicted intracellular proteins				(M5902)HALLMARK APOPTOSIS; (M5890)HALLMARK TNFA SIGNALING VIA NFKB; (M5891)HALLMARK HYPOXIA	0.0	0.0	0.0	0.0	0.0	0.0	0.0	0.0	0.0	0.0	0.0	0.0	0.0	0.0	0.0	0.0	1.0	1.0	0.0	0.0
IER5	51278	symbol	H. sapiens	51278	H. sapiens	IER5	immediate early response 5	GO:1900036 positive regulation of cellular response to heat;GO:1900034 regulation of cellular response to heat;GO:0034605 cellular response to heat		Predicted intracellular proteins	Nucleoplasm (Approved); Additional: Nucleoli			(M5890)HALLMARK TNFA SIGNALING VIA NFKB; (M5939)HALLMARK P53 PATHWAY	0.0	0.0	0.0	0.0	0.0	0.0	0.0	0.0	0.0	0.0	0.0	0.0	1.0	0.0	0.0	0.0	1.0	0.0	0.0	0.0
IER5L	389792	symbol	H. sapiens	389792	H. sapiens	IER5L	immediate early response 5 like			Predicted intracellular proteins	Nucleoplasm (Approved)				0.0	0.0	0.0	0.0	0.0	0.0	0.0	0.0	0.0	0.0	0.0	0.0	0.0	0.0	0.0	0.0	0.0	0.0	0.0	0.0
IFFO1	25900	symbol	H. sapiens	25900	H. sapiens	IFFO1	intermediate filament family orphan 1	GO:1990683 DNA double-strand break attachment to nuclear envelope;GO:1990166 protein localization to site of double-strand break;GO:0097240 chromosome attachment to the nuclear envelope		Predicted intracellular proteins					0.0	0.0	0.0	0.0	0.0	0.0	0.0	0.0	0.0	0.0	0.0	0.0	0.0	0.0	0.0	0.0	0.0	0.0	0.0	0.0
IFI27	3429	symbol	H. sapiens	3429	H. sapiens	IFI27	interferon alpha inducible protein 27	GO:0044827 modulation by host of viral genome replication;GO:0044788 modulation by host of viral process;GO:0046825 regulation of protein export from nucleus		Predicted intracellular proteins			(M295)SIG PIP3 SIGNALING IN CARDIAC MYOCTES	(M5911)HALLMARK INTERFERON ALPHA RESPONSE; (M5913)HALLMARK INTERFERON GAMMA RESPONSE	0.0	0.0	0.0	0.0	0.0	0.0	0.0	0.0	0.0	0.0	0.0	1.0	0.0	1.0	0.0	0.0	0.0	0.0	0.0	0.0
IFI27L2	83982	symbol	H. sapiens	83982	H. sapiens	IFI27L2	interferon alpha inducible protein 27 like 2	GO:0097190 apoptotic signaling pathway;GO:0006915 apoptotic process;GO:0012501 programmed cell death		Predicted intracellular proteins	Cytosol (Approved); Additional: Nucleoli				0.0	0.0	0.0	0.0	0.0	0.0	0.0	0.0	0.0	0.0	0.0	1.0	0.0	0.0	0.0	0.0	0.0	0.0	0.0	0.0
IFT27	11020	symbol	H. sapiens	11020	H. sapiens	IFT27	intraflagellar transport 27	GO:0060122 inner ear receptor cell stereocilium organization;GO:0042073 intraciliary transport;GO:0060119 inner ear receptor cell development		Predicted intracellular proteins; Disease related genes	Mitochondria;Nucleoplasm (Approved)				0.0	0.0	0.0	0.0	0.0	0.0	0.0	0.0	0.0	0.0	0.0	0.0	0.0	0.0	0.0	0.0	0.0	0.0	0.0	0.0
IGFBP2	3485	symbol	H. sapiens	3485	H. sapiens	IGFBP2	insulin like growth factor binding protein 2	GO:0010226 response to lithium ion;GO:0043567 regulation of insulin-like growth factor receptor signaling pathway;GO:0042104 positive regulation of activated T cell proliferation		Cancer-related genes:Candidate cancer biomarkers; Predicted intracellular proteins; Predicted secreted proteins	Endoplasmic reticulum (Approved)		(M3008)NABA ECM GLYCOPROTEINS; (M5884)NABA CORE MATRISOME; (M5889)NABA MATRISOME	(M5941)HALLMARK UV RESPONSE UP; (M5930)HALLMARK EPITHELIAL MESENCHYMAL TRANSITION; (M5956)HALLMARK KRAS SIGNALING DN	0.0	0.0	0.0	0.0	0.0	0.0	0.0	0.0	0.0	0.0	0.0	0.0	0.0	0.0	0.0	1.0	0.0	0.0	0.0	0.0
IGFBP7	3490	symbol	H. sapiens	3490	H. sapiens	IGFBP7	insulin like growth factor binding protein 7	GO:0051414 response to cortisol;GO:0007566 embryo implantation;GO:0050810 regulation of steroid biosynthetic process		Predicted secreted proteins; Disease related genes	Golgi apparatus (Approved)	Insulin pork	(M3008)NABA ECM GLYCOPROTEINS; (M5884)NABA CORE MATRISOME; (M5889)NABA MATRISOME	(M5909)HALLMARK MYOGENESIS	1.0	1.0	0.0	0.0	0.0	0.0	0.0	0.0	0.0	0.0	0.0	0.0	1.0	0.0	0.0	0.0	0.0	0.0	0.0	0.0
IGFBP7-AS1	255130	symbol	H. sapiens	255130	H. sapiens	IGFBP7-AS1	IGFBP7 antisense RNA 1								0.0	0.0	0.0	0.0	0.0	0.0	0.0	0.0	0.0	0.0	0.0	0.0	0.0	0.0	0.0	0.0	0.0	0.0	0.0	0.0
IGFN1	91156	symbol	H. sapiens	91156	H. sapiens	IGFN1	immunoglobulin like and fibronectin type III domain containing 1	GO:0010842 retina layer formation;GO:0060042 retina morphogenesis in camera-type eye;GO:0003407 neural retina development		Predicted intracellular proteins	Midbody ring (Approved)				0.0	0.0	0.0	0.0	0.0	0.0	0.0	0.0	0.0	0.0	0.0	0.0	0.0	0.0	0.0	0.0	0.0	0.0	0.0	0.0
IKBKB	3551	symbol	H. sapiens	3551	H. sapiens	IKBKB	inhibitor of nuclear factor kappa B kinase subunit beta	GO:0002479 antigen processing and presentation of exogenous peptide antigen via MHC class I, TAP-dependent;GO:0035509 negative regulation of myosin-light-chain-phosphatase activity;GO:1903347 negative regulation of bicellular tight junction assembly	Other	ENZYME proteins:Transferases; RAS pathway related proteins; Kinases; Predicted intracellular proteins; FDA approved drug targets:Small molecule drugs; Enzymes; Disease related genes; Cancer-related genes	Cytosol (Supported)	Mesalazine; Sulfasalazine; Acetylsalicylic acid; Auranofin; Arsenic trioxide; MLN0415; Acetylcysteine; Ertiprotafib; Fostamatinib	(M26)PID NFKAPPAB ATYPICAL PATHWAY; (M37)PID NFKAPPAB CANONICAL PATHWAY; (M264)PID TOLL ENDOGENOUS PATHWAY	(M5950)HALLMARK ALLOGRAFT REJECTION	0.0	0.0	0.0	0.0	1.0	0.0	0.0	0.0	0.0	0.0	0.0	0.0	0.0	1.0	0.0	0.0	0.0	1.0	1.0	0.0
IKBKG	8517	symbol	H. sapiens	8517	H. sapiens	IKBKG	inhibitor of nuclear factor kappa B kinase regulatory subunit gamma	GO:0050862 positive regulation of T cell receptor signaling pathway;GO:0050857 positive regulation of antigen receptor-mediated signaling pathway;GO:0043276 anoikis		Predicted intracellular proteins; Disease related genes; RAS pathway related proteins	Cytosol (Enhanced)	AGRO100; Tarenflurbil	(M37)PID NFKAPPAB CANONICAL PATHWAY; (M264)PID TOLL ENDOGENOUS PATHWAY; (M7416)ST GAQ PATHWAY	(M5915)HALLMARK APICAL JUNCTION	0.0	1.0	1.0	0.0	0.0	0.0	0.0	0.0	0.0	0.0	0.0	0.0	0.0	1.0	0.0	0.0	0.0	1.0	1.0	1.0
IL11	3589	symbol	H. sapiens	3589	H. sapiens	IL11	interleukin 11	GO:1903659 regulation of complement-dependent cytotoxicity;GO:0097278 complement-dependent cytotoxicity;GO:2000352 negative regulation of endothelial cell apoptotic process		Cancer-related genes:Candidate cancer biomarkers; Predicted intracellular proteins; Predicted secreted proteins			(M5883)NABA SECRETED FACTORS; (M5885)NABA MATRISOME ASSOCIATED; (M5889)NABA MATRISOME	(M5950)HALLMARK ALLOGRAFT REJECTION	0.0	1.0	0.0	0.0	0.0	0.0	1.0	0.0	0.0	0.0	0.0	0.0	0.0	0.0	0.0	0.0	0.0	0.0	0.0	0.0
IL17D	53342	symbol	H. sapiens	53342	H. sapiens	IL17D	interleukin 17D	GO:0032725 positive regulation of granulocyte macrophage colony-stimulating factor production;GO:0032604 granulocyte macrophage colony-stimulating factor production;GO:0032645 regulation of granulocyte macrophage colony-stimulating factor production		Predicted secreted proteins			(M5883)NABA SECRETED FACTORS; (M5885)NABA MATRISOME ASSOCIATED; (M5889)NABA MATRISOME		0.0	0.0	0.0	0.0	0.0	0.0	1.0	0.0	0.0	0.0	0.0	0.0	0.0	0.0	0.0	0.0	0.0	0.0	1.0	0.0
IL1A	3552	symbol	H. sapiens	3552	H. sapiens	IL1A	interleukin 1 alpha	GO:0033092 positive regulation of immature T cell proliferation in thymus;GO:0035234 ectopic germ cell programmed cell death;GO:0033091 positive regulation of immature T cell proliferation		Cancer-related genes:Candidate cancer biomarkers; Predicted intracellular proteins; Predicted secreted proteins; Transporters:Transporter channels and pores		Rilonacept	(M110)PID IL1 PATHWAY; (M239)PID A6B1 A6B4 INTEGRIN PATHWAY; (M236)PID DELTA NP63 PATHWAY	(M5902)HALLMARK APOPTOSIS; (M5890)HALLMARK TNFA SIGNALING VIA NFKB; (M5932)HALLMARK INFLAMMATORY RESPONSE	1.0	1.0	0.0	0.0	1.0	0.0	0.0	0.0	0.0	0.0	0.0	1.0	0.0	0.0	0.0	0.0	0.0	1.0	1.0	0.0
IL1B	3553	symbol	H. sapiens	3553	H. sapiens	IL1B	interleukin 1 beta	GO:1903597 negative regulation of gap junction assembly;GO:0035504 regulation of myosin light chain kinase activity;GO:0035505 positive regulation of myosin light chain kinase activity		Cancer-related genes:Candidate cancer biomarkers; Candidate cardiovascular disease genes; FDA approved drug targets:Biotech drugs; Predicted intracellular proteins; Predicted secreted proteins; FDA approved drug targets:Small molecule drugs; Transporters:Transporter channels and pores		Donepezil; Minocycline; VP025; Gallium nitrate; Talmapimod; Etiprednol dicloacetate; VX-702; VX-765; Andrographolide; Canakinumab; Rilonacept; Foreskin keratinocyte (neonatal); Binimetinib; Gevokizumab; Dilmapimod	(M11736)SA MMP CYTOKINE CONNECTION; (M267)PID ANTHRAX PATHWAY; (M36)PID IL27 PATHWAY	(M5897)HALLMARK IL6 JAK STAT3 SIGNALING; (M5902)HALLMARK APOPTOSIS; (M5890)HALLMARK TNFA SIGNALING VIA NFKB	0.0	0.0	0.0	0.0	1.0	0.0	1.0	0.0	0.0	0.0	0.0	1.0	0.0	0.0	0.0	0.0	1.0	1.0	1.0	1.0
IL34	146433	symbol	H. sapiens	146433	H. sapiens	IL34	interleukin 34	GO:0061514 interleukin-34-mediated signaling pathway;GO:0061518 microglial cell proliferation;GO:0120041 positive regulation of macrophage proliferation		Predicted intracellular proteins; Predicted secreted proteins			(M5883)NABA SECRETED FACTORS; (M5885)NABA MATRISOME ASSOCIATED; (M5889)NABA MATRISOME		0.0	0.0	0.0	0.0	0.0	0.0	1.0	0.0	0.0	0.0	0.0	0.0	0.0	0.0	0.0	0.0	0.0	0.0	0.0	0.0
IMP3	55272	symbol	H. sapiens	55272	H. sapiens	IMP3	IMP U3 small nucleolar ribonucleoprotein 3	GO:0006364 rRNA processing;GO:0016072 rRNA metabolic process;GO:0042254 ribosome biogenesis		Predicted intracellular proteins; Ribosomal proteins	Nucleoli;Nucleoplasm (Enhanced)			(M5922)HALLMARK UNFOLDED PROTEIN RESPONSE	1.0	0.0	0.0	0.0	0.0	0.0	0.0	0.0	0.0	1.0	0.0	0.0	0.0	0.0	0.0	0.0	0.0	0.0	0.0	0.0
INAFM1	255783	symbol	H. sapiens	255783	H. sapiens	INAFM1	InaF motif containing 1			Predicted intracellular proteins					0.0	0.0	0.0	0.0	0.0	0.0	0.0	0.0	0.0	0.0	0.0	0.0	0.0	0.0	0.0	0.0	0.0	0.0	0.0	0.0
INO80B	83444	symbol	H. sapiens	83444	H. sapiens	INO80B	INO80 complex subunit B	GO:0043044 ATP-dependent chromatin remodeling;GO:0006338 chromatin remodeling;GO:0006310 DNA recombination		Predicted intracellular proteins	Nucleoli;Nucleoplasm (Supported)				0.0	1.0	1.0	0.0	0.0	0.0	0.0	0.0	0.0	0.0	0.0	0.0	0.0	0.0	0.0	0.0	0.0	0.0	0.0	0.0
INO80E	283899	symbol	H. sapiens	283899	H. sapiens	INO80E	INO80 complex subunit E	GO:0006338 chromatin remodeling;GO:0006310 DNA recombination;GO:0006281 DNA repair		Predicted intracellular proteins	Nucleoplasm (Supported); Additional: Nucleoli rim				0.0	1.0	1.0	0.0	0.0	0.0	0.0	0.0	0.0	0.0	0.0	0.0	0.0	0.0	0.0	0.0	0.0	0.0	0.0	0.0
INPP5A	3632	symbol	H. sapiens	3632	H. sapiens	INPP5A	inositol polyphosphate-5-phosphatase A	GO:0046855 inositol phosphate dephosphorylation;GO:0046838 phosphorylated carbohydrate dephosphorylation;GO:0071545 inositol phosphate catabolic process		Predicted intracellular proteins; ENZYME proteins:Hydrolases; Enzymes	Cytosol (Approved); Additional: Plasma membrane				0.0	0.0	0.0	0.0	0.0	0.0	0.0	0.0	0.0	0.0	0.0	0.0	0.0	0.0	0.0	0.0	0.0	0.0	0.0	0.0
INPP5K	51763	symbol	H. sapiens	51763	H. sapiens	INPP5K	inositol polyphosphate-5-phosphatase K	GO:2001151 regulation of renal water transport;GO:2001153 positive regulation of renal water transport;GO:2000466 negative regulation of glycogen (starch) synthase activity		Predicted intracellular proteins; ENZYME proteins:Hydrolases; Enzymes; Disease related genes; Potential drug targets					0.0	0.0	0.0	1.0	1.0	0.0	0.0	1.0	0.0	0.0	0.0	1.0	1.0	0.0	0.0	0.0	0.0	0.0	0.0	0.0
INTS1	26173	symbol	H. sapiens	26173	H. sapiens	INTS1	integrator complex subunit 1	GO:0034474 U2 snRNA 3'-end processing;GO:0034472 snRNA 3'-end processing;GO:0016180 snRNA processing		Predicted intracellular proteins	Nucleoplasm (Approved)				0.0	0.0	0.0	0.0	0.0	0.0	0.0	0.0	0.0	1.0	0.0	0.0	0.0	0.0	0.0	0.0	0.0	0.0	0.0	0.0
INTS5	80789	symbol	H. sapiens	80789	H. sapiens	INTS5	integrator complex subunit 5	GO:0034472 snRNA 3'-end processing;GO:0016180 snRNA processing;GO:0016073 snRNA metabolic process		Predicted intracellular proteins	Nucleoplasm (Supported); Additional: Cytosol				0.0	0.0	0.0	0.0	0.0	0.0	0.0	0.0	0.0	1.0	0.0	0.0	0.0	0.0	0.0	0.0	0.0	0.0	0.0	0.0
IPO9-AS1	100873949	symbol	H. sapiens	100873949	H. sapiens	IPO9-AS1	IPO9 antisense RNA 1								0.0	0.0	0.0	0.0	0.0	0.0	0.0	0.0	0.0	0.0	0.0	0.0	0.0	0.0	0.0	0.0	0.0	0.0	0.0	0.0
IRAIN	104472848	symbol	H. sapiens	104472848	H. sapiens	IRAIN	IGF1R antisense imprinted non-protein coding RNA								0.0	0.0	0.0	0.0	0.0	0.0	0.0	0.0	0.0	0.0	0.0	0.0	0.0	0.0	0.0	0.0	0.0	0.0	0.0	0.0
IRAK2	3656	symbol	H. sapiens	3656	H. sapiens	IRAK2	interleukin 1 receptor associated kinase 2	GO:0002755 MyD88-dependent toll-like receptor signaling pathway;GO:0070498 interleukin-1-mediated signaling pathway;GO:0031663 lipopolysaccharide-mediated signaling pathway	TKL Ser/Thr protein kinase family	Predicted intracellular proteins; Enzymes; Kinases:TKL Ser/Thr protein kinases	Vesicles (Approved)		(M264)PID TOLL ENDOGENOUS PATHWAY	(M5932)HALLMARK INFLAMMATORY RESPONSE	0.0	0.0	0.0	0.0	0.0	0.0	0.0	0.0	0.0	0.0	0.0	0.0	0.0	0.0	0.0	0.0	0.0	1.0	1.0	0.0
IRF2BP1	26145	symbol	H. sapiens	26145	H. sapiens	IRF2BP1	interferon regulatory factor 2 binding protein 1	GO:0000209 protein polyubiquitination;GO:0016567 protein ubiquitination;GO:0032446 protein modification by small protein conjugation		ENZYME proteins:Transferases; Predicted intracellular proteins; Enzymes	Nucleoplasm (Supported)				0.0	0.0	0.0	0.0	0.0	0.0	0.0	0.0	0.0	0.0	0.0	0.0	0.0	1.0	0.0	0.0	0.0	0.0	0.0	0.0
IRF2BP2	359948	symbol	H. sapiens	359948	H. sapiens	IRF2BP2	interferon regulatory factor 2 binding protein 2	GO:0002327 immature B cell differentiation;GO:0030183 B cell differentiation;GO:0042113 B cell activation		Predicted intracellular proteins	Nucleoplasm (Enhanced)				0.0	0.0	0.0	0.0	0.0	0.0	0.0	0.0	0.0	0.0	0.0	0.0	0.0	0.0	0.0	0.0	0.0	0.0	0.0	0.0
IRF2BPL	64207	symbol	H. sapiens	64207	H. sapiens	IRF2BPL	interferon regulatory factor 2 binding protein like	GO:0046543 development of secondary female sexual characteristics;GO:0045136 development of secondary sexual characteristics;GO:0016567 protein ubiquitination		Predicted intracellular proteins	Nucleoplasm (Enhanced)				0.0	0.0	0.0	0.0	0.0	0.0	0.0	0.0	0.0	0.0	0.0	0.0	0.0	0.0	0.0	0.0	0.0	0.0	0.0	0.0
IRF7	3665	symbol	H. sapiens	3665	H. sapiens	IRF7	interferon regulatory factor 7	GO:0019043 establishment of viral latency;GO:0034127 regulation of MyD88-independent toll-like receptor signaling pathway;GO:2000110 negative regulation of macrophage apoptotic process		Predicted intracellular proteins; Disease related genes; Transcription factors:Helix-turn-helix domains	Nucleoplasm (Supported); Additional: Cytosol		(M2)PID SMAD2 3NUCLEAR PATHWAY	(M5911)HALLMARK INTERFERON ALPHA RESPONSE; (M5913)HALLMARK INTERFERON GAMMA RESPONSE; (M5921)HALLMARK COMPLEMENT	0.0	1.0	0.0	0.0	0.0	0.0	1.0	0.0	0.0	0.0	0.0	0.0	0.0	0.0	0.0	0.0	0.0	0.0	1.0	0.0
IRGQ	126298	symbol	H. sapiens	126298	H. sapiens	IRGQ	immunity related GTPase Q			Predicted intracellular proteins	Vesicles (Approved)				0.0	0.0	0.0	0.0	0.0	0.0	0.0	0.0	0.0	0.0	0.0	0.0	0.0	0.0	0.0	0.0	0.0	0.0	0.0	0.0
IRX3	79191	symbol	H. sapiens	79191	H. sapiens	IRX3	iroquois homeobox 3	GO:0003165 Purkinje myocyte development;GO:0003167 atrioventricular bundle cell differentiation;GO:0060932 His-Purkinje system cell differentiation		Predicted intracellular proteins; Transcription factors:Helix-turn-helix domains	Vesicles (Approved)				0.0	0.0	0.0	0.0	0.0	0.0	1.0	0.0	0.0	0.0	1.0	0.0	0.0	0.0	0.0	0.0	0.0	0.0	0.0	0.0
ISG15	9636	symbol	H. sapiens	9636	H. sapiens	ISG15	ISG15 ubiquitin like modifier	GO:0032459 regulation of protein oligomerization;GO:0032461 positive regulation of protein oligomerization;GO:0032020 ISG15-protein conjugation		Predicted intracellular proteins; Predicted secreted proteins; Disease related genes				(M5911)HALLMARK INTERFERON ALPHA RESPONSE; (M5913)HALLMARK INTERFERON GAMMA RESPONSE	1.0	1.0	0.0	1.0	0.0	0.0	1.0	0.0	0.0	0.0	0.0	0.0	0.0	1.0	0.0	0.0	0.0	0.0	1.0	0.0
ISL2	64843	symbol	H. sapiens	64843	H. sapiens	ISL2	ISL LIM homeobox 2	GO:0021524 visceral motor neuron differentiation;GO:0021520 spinal cord motor neuron cell fate specification;GO:0048934 peripheral nervous system neuron differentiation		Predicted intracellular proteins; Transcription factors:Helix-turn-helix domains	Rods & Rings (Approved)				0.0	0.0	0.0	0.0	0.0	0.0	1.0	0.0	0.0	0.0	0.0	0.0	0.0	0.0	0.0	0.0	0.0	0.0	0.0	0.0
ISOC2	79763	symbol	H. sapiens	79763	H. sapiens	ISOC2	isochorismatase domain containing 2	GO:0031648 protein destabilization;GO:0031647 regulation of protein stability;GO:0065008 regulation of biological quality		Predicted intracellular proteins	Mitochondria (Approved); Additional: Cytosol				0.0	0.0	0.0	0.0	0.0	0.0	0.0	0.0	0.0	0.0	0.0	0.0	0.0	0.0	0.0	0.0	0.0	0.0	0.0	0.0
ISYNA1	51477	symbol	H. sapiens	51477	H. sapiens	ISYNA1	inositol-3-phosphate synthase 1	GO:0006021 inositol biosynthetic process;GO:0006020 inositol metabolic process;GO:0046173 polyol biosynthetic process		Predicted intracellular proteins; ENZYME proteins:Isomerase; Enzymes	Nucleoplasm (Approved); Additional: Cytosol	2-Deoxy-D-Glucitol 6-(E)-Vinylhomophosphonate; 2-Deoxy-Glucitol-6-Phosphate; Glycerin			0.0	0.0	0.0	0.0	0.0	0.0	0.0	0.0	0.0	0.0	0.0	0.0	0.0	0.0	0.0	0.0	0.0	0.0	0.0	0.0
ITFG3	83986	gene_synonym	H. sapiens	83986	H. sapiens	FAM234A	family with sequence similarity 234 member A	GO:0008150 biological_process		Predicted intracellular proteins	Mitochondria (Uncertain); Additional: Nucleoplasm				0.0	0.0	0.0	0.0	0.0	0.0	0.0	0.0	0.0	0.0	0.0	0.0	0.0	0.0	0.0	0.0	0.0	0.0	0.0	0.0
ITGA7	3679	symbol	H. sapiens	3679	H. sapiens	ITGA7	integrin subunit alpha 7	GO:0035987 endodermal cell differentiation;GO:0001706 endoderm formation;GO:0034113 heterotypic cell-cell adhesion		Predicted intracellular proteins; Disease related genes	Plasma membrane (Approved); Additional: Nuclear speckles;Vesicles		(M47)PID INTEGRIN CS PATHWAY; (M67)PID ARF6 TRAFFICKING PATHWAY; (M18)PID INTEGRIN1 PATHWAY	(M5905)HALLMARK ADIPOGENESIS; (M5909)HALLMARK MYOGENESIS	0.0	0.0	0.0	0.0	0.0	0.0	0.0	0.0	0.0	0.0	1.0	0.0	0.0	0.0	0.0	0.0	0.0	0.0	0.0	0.0
ITGB4	3691	symbol	H. sapiens	3691	H. sapiens	ITGB4	integrin subunit beta 4	GO:0032290 peripheral nervous system myelin formation;GO:0031581 hemidesmosome assembly;GO:0035878 nail development		Cancer-related genes:Candidate cancer biomarkers; Predicted intracellular proteins; Disease related genes; CD markers	Cell Junctions;Plasma membrane (Supported)	R1295	(M158)PID INTEGRIN4 PATHWAY; (M47)PID INTEGRIN CS PATHWAY; (M65)PID FRA PATHWAY	(M5909)HALLMARK MYOGENESIS; (M5915)HALLMARK APICAL JUNCTION; (M5939)HALLMARK P53 PATHWAY	0.0	0.0	0.0	0.0	0.0	0.0	0.0	0.0	0.0	0.0	0.0	0.0	0.0	0.0	0.0	0.0	0.0	0.0	0.0	0.0
ITPRIPL2	162073	symbol	H. sapiens	162073	H. sapiens	ITPRIPL2	ITPRIP like 2			Predicted intracellular proteins	Centrosome (Approved)				0.0	0.0	0.0	0.0	0.0	0.0	0.0	0.0	0.0	0.0	0.0	0.0	0.0	0.0	0.0	0.0	0.0	0.0	0.0	0.0
IZUMO4	113177	symbol	H. sapiens	113177	H. sapiens	IZUMO4	IZUMO family member 4			Predicted intracellular proteins; Predicted secreted proteins; Transporters:Accessory Factors Involved in Transport					0.0	1.0	0.0	0.0	0.0	0.0	0.0	0.0	0.0	0.0	0.0	0.0	0.0	0.0	0.0	0.0	0.0	0.0	0.0	0.0
JAG1	182	symbol	H. sapiens	182	H. sapiens	JAG1	jagged canonical Notch ligand 1	GO:0061444 endocardial cushion cell development;GO:0061443 endocardial cushion cell differentiation;GO:0061073 ciliary body morphogenesis		Predicted intracellular proteins; Disease related genes; CD markers	Golgi apparatus;Plasma membrane (Approved)		(M256)PID TAP63 PATHWAY; (M17)PID NOTCH PATHWAY	(M5903)HALLMARK NOTCH SIGNALING; (M5944)HALLMARK ANGIOGENESIS; (M5895)HALLMARK WNT BETA CATENIN SIGNALING	0.0	1.0	0.0	0.0	0.0	0.0	1.0	0.0	0.0	0.0	1.0	0.0	1.0	0.0	0.0	0.0	0.0	1.0	1.0	0.0
JAG2	3714	symbol	H. sapiens	3714	H. sapiens	JAG2	jagged canonical Notch ligand 2	GO:1990134 epithelial cell apoptotic process involved in palatal shelf morphogenesis;GO:0009912 auditory receptor cell fate commitment;GO:0060120 inner ear receptor cell fate commitment			Vesicles (Supported); Additional: Cytosol		(M17)PID NOTCH PATHWAY; (M19)PID P73PATHWAY	(M5944)HALLMARK ANGIOGENESIS; (M5895)HALLMARK WNT BETA CATENIN SIGNALING; (M5939)HALLMARK P53 PATHWAY	0.0	1.0	0.0	0.0	0.0	0.0	0.0	0.0	0.0	0.0	0.0	0.0	0.0	0.0	0.0	0.0	0.0	1.0	0.0	0.0
JMJD1C-AS1	84989	symbol	H. sapiens	84989	H. sapiens	JMJD1C-AS1	JMJD1C antisense RNA 1								0.0	0.0	0.0	0.0	0.0	0.0	0.0	0.0	0.0	0.0	0.0	0.0	0.0	0.0	0.0	0.0	0.0	0.0	0.0	0.0
JMJD4	65094	symbol	H. sapiens	65094	H. sapiens	JMJD4	jumonji domain containing 4	GO:0045905 positive regulation of translational termination;GO:0006449 regulation of translational termination;GO:0006415 translational termination		Predicted intracellular proteins	Plasma membrane (Uncertain); Additional: Vesicles				1.0	0.0	0.0	0.0	0.0	0.0	0.0	0.0	0.0	0.0	0.0	0.0	0.0	0.0	0.0	0.0	0.0	0.0	0.0	0.0
JTB	10899	symbol	H. sapiens	10899	H. sapiens	JTB	jumping translocation breakpoint	GO:0000281 mitotic cytokinesis;GO:0061640 cytoskeleton-dependent cytokinesis;GO:0000910 cytokinesis		Cancer-related genes:Candidate cancer biomarkers	Vesicles (Approved); Additional: Mitochondria				0.0	0.0	0.0	0.0	0.0	0.0	0.0	0.0	0.0	0.0	0.0	0.0	0.0	0.0	0.0	0.0	0.0	0.0	0.0	0.0
JUNB	3726	symbol	H. sapiens	3726	H. sapiens	JUNB	JunB proto-oncogene, AP-1 transcription factor subunit	GO:0060136 embryonic process involved in female pregnancy;GO:0001829 trophectodermal cell differentiation;GO:0060716 labyrinthine layer blood vessel development		Predicted intracellular proteins; Transcription factors:Basic domains	Nucleoplasm (Supported)		(M235)PID TCR CALCIUM PATHWAY; (M65)PID FRA PATHWAY; (M60)PID NFAT TFPATHWAY	(M5938)HALLMARK REACTIVE OXYGEN SPECIES PATHWAY; (M5896)HALLMARK TGF BETA SIGNALING; (M5941)HALLMARK UV RESPONSE UP	0.0	0.0	0.0	0.0	0.0	0.0	1.0	0.0	0.0	0.0	0.0	0.0	0.0	0.0	0.0	0.0	0.0	1.0	1.0	0.0
JUND	3727	symbol	H. sapiens	3727	H. sapiens	JUND	JunD proto-oncogene, AP-1 transcription factor subunit	GO:0002076 osteoblast development;GO:0043032 positive regulation of macrophage activation;GO:0043030 regulation of macrophage activation		Cancer-related genes:Candidate cancer biomarkers; Predicted intracellular proteins; Transcription factors:Basic domains	Nucleoplasm (Supported)		(M65)PID FRA PATHWAY; (M166)PID ATF2 PATHWAY; (M167)PID AP1 PATHWAY		0.0	1.0	0.0	0.0	0.0	0.0	0.0	0.0	0.0	0.0	0.0	0.0	0.0	0.0	0.0	0.0	0.0	0.0	1.0	0.0
KCNG2	26251	symbol	H. sapiens	26251	H. sapiens	KCNG2	potassium voltage-gated channel modifier subfamily G member 2	GO:0051260 protein homooligomerization;GO:0008016 regulation of heart contraction;GO:0071805 potassium ion transmembrane transport		Voltage-gated ion channels:Voltage-Gated Potassium Channels					0.0	0.0	0.0	0.0	0.0	0.0	0.0	0.0	0.0	0.0	0.0	0.0	0.0	0.0	0.0	0.0	0.0	0.0	0.0	0.0
KCNJ13	3769	symbol	H. sapiens	3769	H. sapiens	KCNJ13	potassium inwardly rectifying channel subfamily J member 13	GO:1990573 potassium ion import across plasma membrane;GO:0098659 inorganic cation import across plasma membrane;GO:0099587 inorganic ion import across plasma membrane		Voltage-gated ion channels:Inwardly Rectifying Potassium Channels; Transporters:Transporter channels and pores; Potential drug targets; Disease related genes	Nuclear membrane (Approved)				0.0	0.0	0.0	0.0	0.0	0.0	0.0	0.0	0.0	0.0	0.0	0.0	0.0	0.0	0.0	0.0	0.0	0.0	0.0	0.0
KCNK3	3777	symbol	H. sapiens	3777	H. sapiens	KCNK3	potassium two pore domain channel subfamily K member 3	GO:0051481 negative regulation of cytosolic calcium ion concentration;GO:0030322 stabilization of membrane potential;GO:0071294 cellular response to zinc ion		Transporters:Transporter channels and pores; FDA approved drug targets:Small molecule drugs; Voltage-gated ion channels:Two-P Potassium Channels; Disease related genes		Doxapram; Halothane			0.0	0.0	0.0	0.0	0.0	0.0	0.0	0.0	0.0	0.0	0.0	0.0	0.0	0.0	0.0	0.0	0.0	0.0	0.0	0.0
KCNQ1OT1	10984	symbol	H. sapiens	10984	H. sapiens	KCNQ1OT1	KCNQ1 opposite strand/antisense transcript 1	GO:2000627 positive regulation of miRNA catabolic process;GO:2000625 regulation of miRNA catabolic process;GO:2000630 positive regulation of miRNA metabolic process							0.0	0.0	1.0	0.0	0.0	1.0	0.0	0.0	0.0	1.0	0.0	0.0	0.0	0.0	0.0	0.0	0.0	0.0	0.0	1.0
KCNV2	169522	symbol	H. sapiens	169522	H. sapiens	KCNV2	potassium voltage-gated channel modifier subfamily V member 2	GO:0051260 protein homooligomerization;GO:0071805 potassium ion transmembrane transport;GO:0051259 protein complex oligomerization		Transporters:Transporter channels and pores; Potential drug targets; Disease related genes; Voltage-gated ion channels:Voltage-Gated Potassium Channels					0.0	0.0	0.0	0.0	0.0	0.0	0.0	0.0	0.0	0.0	0.0	0.0	0.0	0.0	0.0	0.0	0.0	0.0	0.0	0.0
KCTD13	253980	symbol	H. sapiens	253980	H. sapiens	KCTD13	potassium channel tetramerization domain containing 13	GO:0035024 negative regulation of Rho protein signal transduction;GO:0045740 positive regulation of DNA replication;GO:0046580 negative regulation of Ras protein signal transduction		Predicted intracellular proteins; Disease related genes	Nuclear bodies;Nucleoplasm (Supported)				0.0	1.0	0.0	0.0	0.0	0.0	0.0	0.0	0.0	0.0	0.0	1.0	0.0	1.0	0.0	0.0	0.0	0.0	0.0	0.0
KCTD16	57528	symbol	H. sapiens	57528	H. sapiens	KCTD16	potassium channel tetramerization domain containing 16	GO:0008277 regulation of G protein-coupled receptor signaling pathway;GO:0051260 protein homooligomerization;GO:0051259 protein complex oligomerization		Predicted intracellular proteins	Nuclear speckles (Approved)				0.0	0.0	0.0	0.0	0.0	0.0	0.0	0.0	0.0	0.0	0.0	0.0	0.0	0.0	0.0	0.0	0.0	0.0	0.0	0.0
KEAP1	9817	symbol	H. sapiens	9817	H. sapiens	KEAP1	kelch like ECH associated protein 1	GO:0042994 cytoplasmic sequestering of transcription factor;GO:0051220 cytoplasmic sequestering of protein;GO:0071353 cellular response to interleukin-4		Cancer-related genes:Mutated cancer genes; Cancer-related genes:Mutational cancer driver genes; FDA approved drug targets:Small molecule drugs; Predicted intracellular proteins	Centriolar satellite;Nucleoplasm (Supported); Additional: Cytosol	Dimethyl fumarate			1.0	0.0	1.0	0.0	0.0	0.0	0.0	0.0	0.0	0.0	0.0	0.0	0.0	1.0	0.0	0.0	0.0	1.0	1.0	1.0
KIAA0513	9764	symbol	H. sapiens	9764	H. sapiens	KIAA0513	KIAA0513			Predicted intracellular proteins	Cytosol;Nucleoplasm (Uncertain)				0.0	0.0	0.0	0.0	0.0	0.0	0.0	0.0	0.0	0.0	0.0	0.0	0.0	0.0	0.0	0.0	0.0	0.0	0.0	0.0
KIAA0895L	653319	symbol	H. sapiens	653319	H. sapiens	KIAA0895L	KIAA0895 like			Predicted intracellular proteins	Nucleoplasm;Vesicles (Approved)				0.0	0.0	0.0	0.0	0.0	0.0	0.0	0.0	0.0	0.0	0.0	0.0	0.0	0.0	0.0	0.0	0.0	0.0	0.0	0.0
KIAA1217	56243	symbol	H. sapiens	56243	H. sapiens	KIAA1217	KIAA1217	GO:0048706 embryonic skeletal system development;GO:0001501 skeletal system development;GO:0043009 chordate embryonic development		Predicted intracellular proteins	Cytosol;Nucleoplasm (Approved)				0.0	0.0	0.0	0.0	0.0	0.0	0.0	0.0	0.0	0.0	0.0	0.0	0.0	0.0	0.0	0.0	0.0	0.0	0.0	0.0
KIAA1671	85379	symbol	H. sapiens	85379	H. sapiens	KIAA1671	KIAA1671			Predicted intracellular proteins	Microtubules (Approved)				0.0	0.0	0.0	0.0	0.0	0.0	0.0	0.0	0.0	0.0	0.0	0.0	0.0	0.0	0.0	0.0	0.0	0.0	0.0	0.0
KIAA1919	91749	gene_synonym	H. sapiens	91749	H. sapiens	MFSD4B	major facilitator superfamily domain containing 4B	GO:1904659 glucose transmembrane transport;GO:0008645 hexose transmembrane transport;GO:0015749 monosaccharide transmembrane transport							0.0	0.0	0.0	0.0	0.0	0.0	0.0	0.0	0.0	0.0	0.0	0.0	0.0	0.0	0.0	0.0	0.0	0.0	0.0	0.0
KIAA2013	90231	symbol	H. sapiens	90231	H. sapiens	KIAA2013	KIAA2013				Golgi apparatus (Approved); Additional: Cytosol				0.0	0.0	0.0	0.0	0.0	0.0	0.0	0.0	0.0	0.0	0.0	0.0	0.0	0.0	0.0	0.0	0.0	0.0	0.0	0.0
KIFC3	3801	symbol	H. sapiens	3801	H. sapiens	KIFC3	kinesin family member C3	GO:0045218 zonula adherens maintenance;GO:0034334 adherens junction maintenance;GO:0045217 cell-cell junction maintenance		Cancer-related genes:Mutational cancer driver genes; Predicted intracellular proteins			(M232)PID ECADHERIN STABILIZATION PATHWAY	(M5909)HALLMARK MYOGENESIS	0.0	0.0	0.0	0.0	0.0	0.0	0.0	0.0	0.0	0.0	0.0	0.0	0.0	0.0	0.0	0.0	0.0	0.0	0.0	0.0
KIRREL3-AS2	100874251	symbol	H. sapiens	100874251	H. sapiens	KIRREL3-AS2	KIRREL3 antisense RNA 2								0.0	0.0	0.0	0.0	0.0	0.0	0.0	0.0	0.0	0.0	0.0	0.0	0.0	0.0	0.0	0.0	0.0	0.0	0.0	0.0
KLHDC3	116138	symbol	H. sapiens	116138	H. sapiens	KLHDC3	kelch domain containing 3	GO:0140627 ubiquitin-dependent protein catabolic process via the C-end degron rule pathway;GO:0007131 reciprocal meiotic recombination;GO:0140527 reciprocal homologous recombination		Predicted intracellular proteins	Nucleoplasm (Enhanced)			(M5941)HALLMARK UV RESPONSE UP	1.0	0.0	0.0	0.0	0.0	0.0	0.0	0.0	0.0	0.0	0.0	0.0	0.0	1.0	0.0	0.0	0.0	0.0	0.0	0.0
KLHL11	55175	symbol	H. sapiens	55175	H. sapiens	KLHL11	kelch like family member 11			Predicted intracellular proteins	Nucleoplasm (Approved); Additional: Nuclear membrane				0.0	0.0	0.0	0.0	0.0	0.0	0.0	0.0	0.0	0.0	0.0	0.0	0.0	1.0	0.0	0.0	0.0	0.0	0.0	0.0
KLHL13	90293	symbol	H. sapiens	90293	H. sapiens	KLHL13	kelch like family member 13	GO:0032465 regulation of cytokinesis;GO:0000910 cytokinesis;GO:0051302 regulation of cell division		Predicted intracellular proteins	Cytosol (Approved)		(M14)PID AURORA B PATHWAY		0.0	0.0	0.0	0.0	0.0	0.0	0.0	0.0	0.0	0.0	0.0	0.0	0.0	1.0	0.0	0.0	0.0	0.0	0.0	0.0
KLHL26	55295	symbol	H. sapiens	55295	H. sapiens	KLHL26	kelch like family member 26			Predicted intracellular proteins					0.0	0.0	0.0	0.0	0.0	0.0	0.0	0.0	0.0	0.0	0.0	0.0	0.0	0.0	0.0	0.0	0.0	0.0	0.0	0.0
KLHL30	377007	symbol	H. sapiens	377007	H. sapiens	KLHL30	kelch like family member 30			Predicted intracellular proteins	Centriolar satellite (Approved)				0.0	0.0	0.0	0.0	0.0	0.0	0.0	0.0	0.0	0.0	0.0	0.0	0.0	0.0	0.0	0.0	0.0	0.0	0.0	0.0
KLHL35	283212	symbol	H. sapiens	283212	H. sapiens	KLHL35	kelch like family member 35			Predicted intracellular proteins	Centrosome;Nucleoplasm (Approved); Additional: Nucleoli fibrillar center				0.0	0.0	0.0	0.0	0.0	0.0	0.0	0.0	0.0	0.0	0.0	0.0	0.0	0.0	0.0	0.0	0.0	0.0	0.0	0.0
KMT2E-AS1	100216545	symbol	H. sapiens	100216545	H. sapiens	KMT2E-AS1	KMT2E antisense RNA 1								0.0	0.0	0.0	0.0	0.0	0.0	0.0	0.0	0.0	0.0	0.0	0.0	0.0	0.0	0.0	0.0	0.0	0.0	0.0	0.0
KPNA6	23633	symbol	H. sapiens	23633	H. sapiens	KPNA6	karyopherin subunit alpha 6	GO:0075506 entry of viral genome into host nucleus through nuclear pore complex via importin;GO:0075732 viral penetration into host nucleus;GO:0075733 intracellular transport of virus		Transporters:Transporter channels and pores; Predicted intracellular proteins	Cytosol (Approved); Additional: Nucleoplasm				0.0	0.0	0.0	1.0	0.0	0.0	0.0	0.0	0.0	0.0	0.0	0.0	0.0	0.0	0.0	0.0	0.0	0.0	0.0	0.0
KRT18	3875	symbol	H. sapiens	3875	H. sapiens	KRT18	keratin 18	GO:1902488 cholangiocyte apoptotic process;GO:0043000 Golgi to plasma membrane CFTR protein transport;GO:0009750 response to fructose		Cancer-related genes:Candidate cancer biomarkers; Predicted intracellular proteins; Disease related genes	Cytosol (Supported)		(M220)PID CASPASE PATHWAY	(M5910)HALLMARK PROTEIN SECRETION; (M5902)HALLMARK APOPTOSIS; (M5906)HALLMARK ESTROGEN RESPONSE EARLY	0.0	0.0	0.0	0.0	0.0	0.0	0.0	0.0	0.0	0.0	0.0	1.0	0.0	0.0	0.0	0.0	0.0	0.0	0.0	0.0
KRT8	3856	symbol	H. sapiens	3856	H. sapiens	KRT8	keratin 8	GO:0051599 response to hydrostatic pressure;GO:0009415 response to water;GO:0097284 hepatocyte apoptotic process		Cancer-related genes:Candidate cancer biomarkers; Predicted intracellular proteins; Disease related genes	Intermediate filaments (Supported)	Tenecteplase; Lanoteplase; Copper	(M229)PID P38 ALPHA BETA DOWNSTREAM PATHWAY	(M5908)HALLMARK ANDROGEN RESPONSE; (M5906)HALLMARK ESTROGEN RESPONSE EARLY	0.0	0.0	0.0	0.0	0.0	0.0	0.0	0.0	0.0	0.0	1.0	1.0	0.0	0.0	0.0	0.0	0.0	0.0	0.0	0.0
L3HYPDH	112849	symbol	H. sapiens	112849	H. sapiens	L3HYPDH	trans-L-3-hydroxyproline dehydratase			Predicted intracellular proteins; Enzymes; ENZYME proteins:Lyases	Vesicles (Uncertain)	Proline			0.0	0.0	0.0	0.0	0.0	0.0	0.0	0.0	0.0	0.0	0.0	0.0	0.0	0.0	0.0	0.0	0.0	0.0	0.0	0.0
LAGE3	8270	symbol	H. sapiens	8270	H. sapiens	LAGE3	L antigen family member 3	GO:0070525 tRNA threonylcarbamoyladenosine metabolic process;GO:0008033 tRNA processing;GO:0006399 tRNA metabolic process		Predicted intracellular proteins; Disease related genes	Nucleoplasm (Supported); Additional: Nuclear bodies				1.0	0.0	0.0	0.0	0.0	0.0	0.0	0.0	0.0	1.0	0.0	0.0	0.0	0.0	0.0	0.0	0.0	0.0	0.0	0.0
LAMA5	3911	symbol	H. sapiens	3911	H. sapiens	LAMA5	laminin subunit alpha 5	GO:0060445 branching involved in salivary gland morphogenesis;GO:0007435 salivary gland morphogenesis;GO:0007431 salivary gland development		Predicted intracellular proteins; Predicted secreted proteins	Vesicles (Approved); Additional: Nucleoplasm	Lanoteplase	(M158)PID INTEGRIN4 PATHWAY; (M5887)NABA BASEMENT MEMBRANES; (M198)PID SYNDECAN 1 PATHWAY		0.0	0.0	0.0	0.0	0.0	0.0	0.0	0.0	0.0	0.0	1.0	0.0	0.0	0.0	0.0	0.0	0.0	0.0	0.0	0.0
LAMC2	3918	symbol	H. sapiens	3918	H. sapiens	LAMC2	laminin subunit gamma 2	GO:0008045 motor neuron axon guidance;GO:0007411 axon guidance;GO:0097485 neuron projection guidance		Predicted secreted proteins; Disease related genes	Cytosol (Approved)		(M158)PID INTEGRIN4 PATHWAY; (M5887)NABA BASEMENT MEMBRANES; (M239)PID A6B1 A6B4 INTEGRIN PATHWAY	(M5907)HALLMARK ESTROGEN RESPONSE LATE; (M5915)HALLMARK APICAL JUNCTION; (M5930)HALLMARK EPITHELIAL MESENCHYMAL TRANSITION	0.0	0.0	0.0	0.0	0.0	0.0	0.0	0.0	0.0	0.0	0.0	0.0	0.0	0.0	0.0	0.0	0.0	0.0	0.0	0.0
LAP3	51056	symbol	H. sapiens	51056	H. sapiens	LAP3	leucine aminopeptidase 3	GO:0006508 proteolysis;GO:0019538 protein metabolic process;GO:1901564 organonitrogen compound metabolic process		Predicted intracellular proteins; ENZYME proteins:Hydrolases; Enzymes; Peptidases:Metallopeptidases	Cytosol (Supported); Additional: Midbody;Nucleoplasm	Leucine Phosphonic Acid; (2S)-3-[(R)-[(1S)-1-amino-3-phenylpropyl](hydroxy)phosphoryl]-2-benzylpropanoic acid; Zofenoprilat		(M5911)HALLMARK INTERFERON ALPHA RESPONSE; (M5913)HALLMARK INTERFERON GAMMA RESPONSE; (M5921)HALLMARK COMPLEMENT	0.0	0.0	0.0	0.0	0.0	0.0	0.0	0.0	0.0	0.0	0.0	0.0	0.0	0.0	0.0	0.0	0.0	0.0	0.0	0.0
LAPTM4B	55353	symbol	H. sapiens	55353	H. sapiens	LAPTM4B	lysosomal protein transmembrane 4 beta	GO:1904351 negative regulation of protein catabolic process in the vacuole;GO:1905166 negative regulation of lysosomal protein catabolic process;GO:0097213 regulation of lysosomal membrane permeability		Transporters:Electrochemical Potential-driven transporters	Golgi apparatus (Approved)				0.0	0.0	0.0	0.0	0.0	0.0	0.0	0.0	0.0	0.0	0.0	0.0	0.0	0.0	0.0	0.0	0.0	0.0	0.0	1.0
LASP1	3927	symbol	H. sapiens	3927	H. sapiens	LASP1	LIM and SH3 protein 1	GO:0034220 ion transmembrane transport;GO:0055085 transmembrane transport;GO:0006811 ion transport		Predicted intracellular proteins; Cancer-related genes	Cytosol;Plasma membrane (Supported); Additional: Focal adhesion sites				0.0	0.0	0.0	0.0	0.0	0.0	0.0	0.0	0.0	0.0	0.0	0.0	0.0	0.0	0.0	0.0	0.0	0.0	0.0	0.0
LAT	27040	symbol	H. sapiens	27040	H. sapiens	LAT	linker for activation of T cells	GO:0043303 mast cell degranulation;GO:0002279 mast cell activation involved in immune response;GO:0002448 mast cell mediated immunity		Predicted intracellular proteins; Disease related genes; RAS pathway related proteins	Plasma membrane (Supported); Additional: Golgi apparatus		(M190)PID TCR JNK PATHWAY; (M9526)ST T CELL SIGNAL TRANSDUCTION; (M141)PID PI3KCI PATHWAY		0.0	0.0	0.0	0.0	0.0	0.0	0.0	0.0	0.0	0.0	0.0	0.0	0.0	0.0	0.0	0.0	0.0	1.0	1.0	0.0
LDB3	11155	symbol	H. sapiens	11155	H. sapiens	LDB3	LIM domain binding 3	GO:0045214 sarcomere organization;GO:0030239 myofibril assembly;GO:0055002 striated muscle cell development		Predicted intracellular proteins; Disease related genes	Cytosol;Focal adhesion sites (Supported); Additional: Nucleoplasm			(M5909)HALLMARK MYOGENESIS	0.0	0.0	0.0	0.0	0.0	0.0	0.0	0.0	0.0	0.0	1.0	0.0	0.0	0.0	0.0	0.0	0.0	0.0	0.0	0.0
LDLR	3949	symbol	H. sapiens	3949	H. sapiens	LDLR	low density lipoprotein receptor	GO:0010899 regulation of phosphatidylcholine catabolic process;GO:1905167 positive regulation of lysosomal protein catabolic process;GO:0061771 response to caloric restriction		Predicted intracellular proteins; Disease related genes		Porfimer sodium		(M5892)HALLMARK CHOLESTEROL HOMEOSTASIS; (M5942)HALLMARK UV RESPONSE DN; (M5890)HALLMARK TNFA SIGNALING VIA NFKB	0.0	0.0	0.0	0.0	0.0	0.0	1.0	0.0	0.0	0.0	0.0	0.0	0.0	0.0	0.0	0.0	0.0	0.0	0.0	1.0
LDLRAD2	401944	symbol	H. sapiens	401944	H. sapiens	LDLRAD2	low density lipoprotein receptor class A domain containing 2			Predicted secreted proteins					0.0	0.0	0.0	0.0	0.0	0.0	0.0	0.0	0.0	0.0	0.0	0.0	0.0	0.0	0.0	0.0	0.0	0.0	0.0	0.0
LENG1	79165	symbol	H. sapiens	79165	H. sapiens	LENG1	leukocyte receptor cluster member 1	GO:0008150 biological_process		Predicted intracellular proteins	Plasma membrane (Approved); Additional: Nucleoplasm				0.0	0.0	0.0	0.0	0.0	0.0	0.0	0.0	0.0	0.0	0.0	0.0	0.0	0.0	0.0	0.0	0.0	0.0	0.0	0.0
LENG9	94059	symbol	H. sapiens	94059	H. sapiens	LENG9	leukocyte receptor cluster member 9			Predicted intracellular proteins	Nucleoli fibrillar center (Approved)				0.0	0.0	0.0	0.0	0.0	0.0	0.0	0.0	0.0	0.0	0.0	0.0	0.0	0.0	0.0	0.0	0.0	0.0	0.0	0.0
LETM1	3954	symbol	H. sapiens	3954	H. sapiens	LETM1	leucine zipper and EF-hand containing transmembrane protein 1	GO:0099093 calcium export from the mitochondrion;GO:0051562 negative regulation of mitochondrial calcium ion concentration;GO:1900069 regulation of cellular hyperosmotic salinity response		Transporters:Electrochemical Potential-driven transporters	Mitochondria (Supported)				0.0	1.0	0.0	1.0	0.0	0.0	0.0	0.0	0.0	0.0	0.0	0.0	0.0	0.0	0.0	0.0	1.0	0.0	0.0	0.0
LGALS3BP	3959	symbol	H. sapiens	3959	H. sapiens	LGALS3BP	galectin 3 binding protein	GO:0006968 cellular defense response;GO:0006897 endocytosis;GO:0007155 cell adhesion		Cancer-related genes:Candidate cancer biomarkers; Predicted secreted proteins				(M5911)HALLMARK INTERFERON ALPHA RESPONSE; (M5913)HALLMARK INTERFERON GAMMA RESPONSE	0.0	0.0	0.0	0.0	0.0	0.0	0.0	0.0	0.0	0.0	0.0	0.0	0.0	0.0	0.0	0.0	0.0	0.0	0.0	0.0
LGALSL	29094	symbol	H. sapiens	29094	H. sapiens	LGALSL	galectin like			Predicted intracellular proteins	Nucleoplasm (Approved)		(M5880)NABA ECM AFFILIATED; (M5885)NABA MATRISOME ASSOCIATED; (M5889)NABA MATRISOME		0.0	0.0	0.0	0.0	0.0	0.0	0.0	0.0	0.0	0.0	0.0	0.0	0.0	0.0	0.0	0.0	0.0	0.0	0.0	0.0
LHFPL4	375323	symbol	H. sapiens	375323	H. sapiens	LHFPL4	LHFPL tetraspan subfamily member 4	GO:1905702 regulation of inhibitory synapse assembly;GO:0097112 gamma-aminobutyric acid receptor clustering;GO:0072578 neurotransmitter-gated ion channel clustering			Golgi apparatus (Approved); Additional: Nucleoplasm				0.0	0.0	0.0	0.0	0.0	0.0	0.0	0.0	0.0	0.0	0.0	0.0	0.0	0.0	0.0	0.0	0.0	0.0	0.0	0.0
LIF	3976	symbol	H. sapiens	3976	H. sapiens	LIF	LIF interleukin 6 family cytokine	GO:1901676 positive regulation of histone H3-K27 acetylation;GO:0043974 histone H3-K27 acetylation;GO:1901674 regulation of histone H3-K27 acetylation		Cancer-related genes:Candidate cancer biomarkers; Predicted intracellular proteins; Predicted secreted proteins	Cytosol (Supported)		(M65)PID FRA PATHWAY; (M145)PID P53 DOWNSTREAM PATHWAY; (M5883)NABA SECRETED FACTORS	(M5947)HALLMARK IL2 STAT5 SIGNALING; (M5890)HALLMARK TNFA SIGNALING VIA NFKB; (M5932)HALLMARK INFLAMMATORY RESPONSE	0.0	0.0	0.0	0.0	0.0	0.0	1.0	0.0	0.0	0.0	1.0	1.0	0.0	0.0	0.0	0.0	0.0	0.0	1.0	0.0
LIMD1	8994	symbol	H. sapiens	8994	H. sapiens	LIMD1	LIM domain containing 1	GO:0035331 negative regulation of hippo signaling;GO:0002076 osteoblast development;GO:0035330 regulation of hippo signaling		Predicted intracellular proteins	Focal adhesion sites;Nucleoplasm (Supported)				1.0	0.0	0.0	0.0	0.0	1.0	1.0	0.0	0.0	0.0	0.0	1.0	0.0	0.0	0.0	1.0	0.0	1.0	0.0	0.0
LINC00115	79854	symbol	H. sapiens	79854	H. sapiens	LINC00115	long intergenic non-protein coding RNA 115								0.0	0.0	0.0	0.0	0.0	0.0	0.0	0.0	0.0	0.0	0.0	0.0	0.0	0.0	0.0	0.0	0.0	0.0	0.0	0.0
LINC00116	205251	gene_synonym	H. sapiens	205251	H. sapiens	MTLN	mitoregulin	GO:0010918 positive regulation of mitochondrial membrane potential;GO:0032000 positive regulation of fatty acid beta-oxidation;GO:0046321 positive regulation of fatty acid oxidation		Predicted intracellular proteins					0.0	0.0	0.0	0.0	1.0	0.0	0.0	0.0	0.0	0.0	1.0	0.0	0.0	0.0	0.0	0.0	0.0	0.0	0.0	1.0
LINC00273	649159	symbol	H. sapiens	649159	H. sapiens	LINC00273	long intergenic non-protein coding RNA 273								0.0	0.0	0.0	0.0	0.0	0.0	0.0	0.0	0.0	0.0	0.0	0.0	0.0	0.0	0.0	0.0	0.0	0.0	0.0	0.0
LINC00493	388789	gene_synonym	H. sapiens	388789	H. sapiens	SMIM26	small integral membrane protein 26				Nucleoplasm (Approved); Additional: Cytosol				0.0	0.0	0.0	0.0	0.0	0.0	0.0	0.0	0.0	0.0	0.0	0.0	0.0	0.0	0.0	0.0	0.0	0.0	0.0	0.0
LINC00597	81698	symbol	H. sapiens	81698	H. sapiens	LINC00597	long intergenic non-protein coding RNA 597								0.0	0.0	0.0	0.0	0.0	0.0	0.0	0.0	0.0	0.0	0.0	0.0	0.0	0.0	0.0	0.0	0.0	0.0	0.0	0.0
LINC00852	84657	symbol	H. sapiens	84657	H. sapiens	LINC00852	long intergenic non-protein coding RNA 852								0.0	0.0	0.0	0.0	0.0	0.0	0.0	0.0	0.0	0.0	0.0	0.0	0.0	0.0	0.0	0.0	0.0	0.0	0.0	0.0
LINC00896	150197	symbol	H. sapiens	150197	H. sapiens	LINC00896	long intergenic non-protein coding RNA 896								0.0	1.0	0.0	0.0	0.0	0.0	0.0	0.0	0.0	0.0	0.0	0.0	0.0	0.0	0.0	0.0	0.0	0.0	0.0	0.0
LINC00910	100130581	symbol	H. sapiens	100130581	H. sapiens	LINC00910	long intergenic non-protein coding RNA 910								0.0	0.0	0.0	0.0	0.0	0.0	0.0	0.0	0.0	0.0	0.0	0.0	0.0	0.0	0.0	0.0	0.0	0.0	0.0	0.0
LINC00936	338758	gene_synonym	H. sapiens	338758	H. sapiens	ATP2B1-AS1	ATP2B1 antisense RNA 1								0.0	0.0	0.0	0.0	0.0	0.0	0.0	0.0	0.0	0.0	0.0	0.0	0.0	0.0	0.0	0.0	0.0	0.0	0.0	0.0
LINC01024	100505636	gene_synonym	H. sapiens	100505636	H. sapiens	MALINC1	mitosis associated long intergenic non-coding RNA 1								0.0	0.0	0.0	0.0	0.0	0.0	0.0	0.0	0.0	0.0	0.0	0.0	0.0	0.0	0.0	0.0	0.0	0.0	0.0	0.0
LINC01107	151171	symbol	H. sapiens	151171	H. sapiens	LINC01107	long intergenic non-protein coding RNA 1107								0.0	0.0	0.0	0.0	0.0	0.0	0.0	0.0	0.0	0.0	0.0	0.0	0.0	0.0	0.0	0.0	0.0	0.0	0.0	0.0
LINC01197	400456	gene_synonym	H. sapiens	400456	H. sapiens	LETR1	lymphatic endothelial transcriptional regulator lncRNA 1								0.0	0.0	0.0	0.0	0.0	0.0	0.0	0.0	0.0	0.0	0.0	0.0	0.0	0.0	0.0	0.0	0.0	0.0	0.0	0.0
LINC01465	283416	symbol	H. sapiens	283416	H. sapiens	LINC01465	long intergenic non-protein coding RNA 1465								0.0	0.0	0.0	0.0	0.0	0.0	0.0	0.0	0.0	0.0	0.0	0.0	0.0	0.0	0.0	0.0	0.0	0.0	0.0	0.0
LINGO3	645191	symbol	H. sapiens	645191	H. sapiens	LINGO3	leucine rich repeat and Ig domain containing 3				Mitochondria (Approved)				0.0	0.0	0.0	0.0	0.0	0.0	0.0	0.0	0.0	0.0	0.0	0.0	0.0	0.0	0.0	0.0	0.0	0.0	0.0	0.0
LIPT2	387787	symbol	H. sapiens	387787	H. sapiens	LIPT2	lipoyl(octanoyl) transferase 2	GO:2000376 positive regulation of oxygen metabolic process;GO:2000374 regulation of oxygen metabolic process;GO:0072592 oxygen metabolic process		ENZYME proteins:Transferases; Predicted intracellular proteins; Enzymes; Disease related genes; Potential drug targets					1.0	0.0	0.0	0.0	0.0	0.0	0.0	0.0	0.0	0.0	0.0	0.0	0.0	0.0	0.0	0.0	0.0	0.0	0.0	0.0
LMAN2	10960	symbol	H. sapiens	10960	H. sapiens	LMAN2	lectin, mannose binding 2	GO:0006890 retrograde vesicle-mediated transport, Golgi to endoplasmic reticulum;GO:0050766 positive regulation of phagocytosis;GO:0007029 endoplasmic reticulum organization		Predicted intracellular proteins					0.0	0.0	0.0	0.0	0.0	0.0	0.0	0.0	0.0	0.0	0.0	0.0	0.0	0.0	0.0	0.0	0.0	0.0	0.0	0.0
LMF1	64788	symbol	H. sapiens	64788	H. sapiens	LMF1	lipase maturation factor 1	GO:0006641 triglyceride metabolic process;GO:0006639 acylglycerol metabolic process;GO:0006638 neutral lipid metabolic process		Disease related genes					0.0	0.0	0.0	0.0	0.0	0.0	0.0	0.0	0.0	0.0	0.0	0.0	0.0	0.0	0.0	0.0	0.0	0.0	0.0	0.0
LMNTD2	256329	symbol	H. sapiens	256329	H. sapiens	LMNTD2	lamin tail domain containing 2	GO:0010847 regulation of chromatin assembly;GO:0001672 regulation of chromatin assembly or disassembly;GO:0031497 chromatin assembly		Predicted intracellular proteins	Cytoplasmic bodies (Approved)				0.0	1.0	0.0	0.0	0.0	0.0	0.0	0.0	0.0	0.0	0.0	0.0	0.0	0.0	0.0	0.0	0.0	0.0	0.0	0.0
LMTK2	22853	symbol	H. sapiens	22853	H. sapiens	LMTK2	lemur tyrosine kinase 2	GO:0033572 transferrin transport;GO:0001881 receptor recycling;GO:0045022 early endosome to late endosome transport	Tyr protein kinase family	ENZYME proteins:Transferases; Kinases:Tyr protein kinases; Enzymes	Centriolar satellite;Nuclear speckles (Approved); Additional: Cytosol;Plasma membrane				0.0	0.0	0.0	0.0	0.0	0.0	0.0	0.0	0.0	0.0	0.0	0.0	0.0	0.0	0.0	0.0	0.0	0.0	0.0	0.0
LOC100130093	116841	Gene_ID	H. sapiens	116841	H. sapiens	SNAP47	synaptosome associated protein 47	GO:0016082 synaptic vesicle priming;GO:0031629 synaptic vesicle fusion to presynaptic active zone membrane;GO:0099500 vesicle fusion to plasma membrane		Predicted intracellular proteins	Cytosol (Approved)				0.0	0.0	0.0	0.0	0.0	0.0	0.0	0.0	0.0	0.0	0.0	0.0	0.0	0.0	0.0	0.0	0.0	0.0	0.0	0.0
LOC100131315	100131315	Gene_ID	H. sapiens	100131315	H. sapiens	GREM1-AS1	GREM1 antisense RNA 1								0.0	0.0	0.0	0.0	0.0	0.0	0.0	0.0	0.0	0.0	0.0	0.0	0.0	0.0	0.0	0.0	0.0	0.0	0.0	0.0
LOC100131655	100131655	Gene_ID	H. sapiens	100131655	H. sapiens	ZNF236-DT	ZNF236 divergent transcript								0.0	0.0	0.0	0.0	0.0	0.0	0.0	0.0	0.0	0.0	0.0	0.0	0.0	0.0	0.0	0.0	0.0	0.0	0.0	0.0
LOC100132356	100132356	Gene_ID	H. sapiens	100132356	H. sapiens	LOC100132356	uncharacterized LOC100132356								0.0	0.0	0.0	0.0	0.0	0.0	0.0	0.0	0.0	0.0	0.0	0.0	0.0	0.0	0.0	0.0	0.0	0.0	0.0	0.0
LOC100133091	100133091	Gene_ID	H. sapiens	100133091	H. sapiens	LOC100133091	uncharacterized LOC100133091								0.0	0.0	0.0	0.0	0.0	0.0	0.0	0.0	0.0	0.0	0.0	0.0	0.0	0.0	0.0	0.0	0.0	0.0	0.0	0.0
LOC100134868	100134868	Gene_ID	H. sapiens	100134868	H. sapiens	LOC100134868	uncharacterized LOC100134868								0.0	0.0	0.0	0.0	0.0	0.0	0.0	0.0	0.0	0.0	0.0	0.0	0.0	0.0	0.0	0.0	0.0	0.0	0.0	0.0
LOC100287042	100287042	Gene_ID	H. sapiens	100287042	H. sapiens	MIF4GD-DT	MIF4GD divergent transcript								0.0	0.0	0.0	0.0	0.0	0.0	0.0	0.0	0.0	0.0	0.0	0.0	0.0	0.0	0.0	0.0	0.0	0.0	0.0	0.0
LOC100288069	100288069	Gene_ID	H. sapiens	100288069	H. sapiens	LOC100288069	uncharacterized LOC100288069								0.0	0.0	0.0	0.0	0.0	0.0	0.0	0.0	0.0	0.0	0.0	0.0	0.0	0.0	0.0	0.0	0.0	0.0	0.0	0.0
LOC100288162	100288162	Gene_ID	H. sapiens	100288162	H. sapiens	LOC100288162	uncharacterized LOC100288162								0.0	0.0	0.0	0.0	0.0	0.0	0.0	0.0	0.0	0.0	0.0	0.0	0.0	0.0	0.0	0.0	0.0	0.0	0.0	0.0
LOC100288778	100288778	Gene_ID	H. sapiens	100288778	H. sapiens	WASH8P	WAS protein family homolog 8, pseudogene								0.0	0.0	0.0	0.0	0.0	0.0	0.0	0.0	0.0	0.0	0.0	0.0	0.0	0.0	0.0	0.0	0.0	0.0	0.0	0.0
LOC100288911	100288911	Gene_ID	H. sapiens	100288911	H. sapiens	CRIM1-DT	CRIM1 divergent transcript								0.0	0.0	0.0	0.0	0.0	0.0	0.0	0.0	0.0	0.0	0.0	0.0	0.0	0.0	0.0	0.0	0.0	0.0	0.0	0.0
LOC100289511	100289511	Gene_ID	H. sapiens	100289511	H. sapiens	LOC100289511	uncharacterized LOC100289511								0.0	0.0	0.0	0.0	0.0	0.0	0.0	0.0	0.0	0.0	0.0	0.0	0.0	0.0	0.0	0.0	0.0	0.0	0.0	0.0
LOC100289580	100289580	Gene_ID	H. sapiens	100289580	H. sapiens	LOC100289580	uncharacterized LOC100289580								0.0	0.0	0.0	0.0	0.0	0.0	0.0	0.0	0.0	0.0	0.0	0.0	0.0	0.0	0.0	0.0	0.0	0.0	0.0	0.0
LOC100499194	100499194	Gene_ID	H. sapiens	100499194	H. sapiens	LOC100499194	uncharacterized LOC100499194								0.0	0.0	0.0	0.0	0.0	0.0	0.0	0.0	0.0	0.0	0.0	0.0	0.0	0.0	0.0	0.0	0.0	0.0	0.0	0.0
LOC100499489	100499489	Gene_ID	H. sapiens	100499489	H. sapiens	LOC100499489	uncharacterized LOC100499489								0.0	0.0	0.0	0.0	0.0	0.0	0.0	0.0	0.0	0.0	0.0	0.0	0.0	0.0	0.0	0.0	0.0	0.0	0.0	0.0
LOC100505915	100505915	Gene_ID	H. sapiens	100505915	H. sapiens	LOC100505915	uncharacterized LOC100505915								0.0	0.0	0.0	0.0	0.0	0.0	0.0	0.0	0.0	0.0	0.0	0.0	0.0	0.0	0.0	0.0	0.0	0.0	0.0	0.0
LOC100506023	100506023	Gene_ID	H. sapiens	100506023	H. sapiens	LOC100506023	uncharacterized LOC100506023								0.0	0.0	0.0	0.0	0.0	0.0	0.0	0.0	0.0	0.0	0.0	0.0	0.0	0.0	0.0	0.0	0.0	0.0	0.0	0.0
LOC100506551	100506551	Gene_ID	H. sapiens	100506551	H. sapiens	LOC100506551	uncharacterized LOC100506551								0.0	0.0	0.0	0.0	0.0	0.0	0.0	0.0	0.0	0.0	0.0	0.0	0.0	0.0	0.0	0.0	0.0	0.0	0.0	0.0
LOC100506860	100506860	Gene_ID	H. sapiens	100506860	H. sapiens	LINC00513	long intergenic non-protein coding RNA 513								0.0	0.0	0.0	0.0	0.0	0.0	0.0	0.0	0.0	0.0	0.0	0.0	0.0	0.0	0.0	0.0	0.0	0.0	0.0	0.0
LOC100507156	100507156	Gene_ID	H. sapiens	100507156	H. sapiens	LOC100507156	uncharacterized LOC100507156								0.0	0.0	0.0	0.0	0.0	0.0	0.0	0.0	0.0	0.0	0.0	0.0	0.0	0.0	0.0	0.0	0.0	0.0	0.0	0.0
LOC100652758	100652758	Gene_ID	H. sapiens	100652758	H. sapiens	LOC100652758	uncharacterized LOC100652758								0.0	0.0	0.0	0.0	0.0	0.0	0.0	0.0	0.0	0.0	0.0	0.0	0.0	0.0	0.0	0.0	0.0	0.0	0.0	0.0
LOC100996255	100996255	Gene_ID	H. sapiens	100996255	H. sapiens	LINC02256	long intergenic non-protein coding RNA 2256								0.0	0.0	0.0	0.0	0.0	0.0	0.0	0.0	0.0	0.0	0.0	0.0	0.0	0.0	0.0	0.0	0.0	0.0	0.0	0.0
LOC101927257	101927257	Gene_ID	H. sapiens	101927257	H. sapiens	MRTFA-AS1	MRTFA antisense RNA 1								0.0	0.0	0.0	0.0	0.0	0.0	0.0	0.0	0.0	0.0	0.0	0.0	0.0	0.0	0.0	0.0	0.0	0.0	0.0	0.0
LOC101927795	101927795	Gene_ID	H. sapiens	101927795	H. sapiens	BZW1-AS1	BZW1 antisense RNA 1								0.0	0.0	0.0	0.0	0.0	0.0	0.0	0.0	0.0	0.0	0.0	0.0	0.0	0.0	0.0	0.0	0.0	0.0	0.0	0.0
LOC101927817	101927817	Gene_ID	H. sapiens	101927817	H. sapiens	LOC101927817	uncharacterized LOC101927817								0.0	0.0	0.0	0.0	0.0	0.0	0.0	0.0	0.0	0.0	0.0	0.0	0.0	0.0	0.0	0.0	0.0	0.0	0.0	0.0
LOC101927884	101927884	Gene_ID	H. sapiens	101927884	H. sapiens	EVA1A-AS	EVA1A antisense RNA								0.0	0.0	0.0	0.0	0.0	0.0	0.0	0.0	0.0	0.0	0.0	0.0	0.0	0.0	0.0	0.0	0.0	0.0	0.0	0.0
LOC145474	145474	Gene_ID	H. sapiens	145474	H. sapiens	LOC145474	uncharacterized LOC145474								0.0	0.0	0.0	0.0	0.0	0.0	0.0	0.0	0.0	0.0	0.0	0.0	0.0	0.0	0.0	0.0	0.0	0.0	0.0	0.0
LOC171391	171391	Gene_ID	H. sapiens	171391	H. sapiens	LOC171391	uncharacterized LOC171391								0.0	0.0	0.0	0.0	0.0	0.0	0.0	0.0	0.0	0.0	0.0	0.0	0.0	0.0	0.0	0.0	0.0	0.0	0.0	0.0
LOC221946	221946	Gene_ID	H. sapiens	221946	H. sapiens	LOC221946	uncharacterized LOC221946								0.0	0.0	0.0	0.0	0.0	0.0	0.0	0.0	0.0	0.0	0.0	0.0	0.0	0.0	0.0	0.0	0.0	0.0	0.0	0.0
LOC254896	254896	Gene_ID	H. sapiens	254896	H. sapiens	LOC254896	uncharacterized LOC254896								0.0	0.0	0.0	0.0	0.0	0.0	0.0	0.0	0.0	0.0	0.0	0.0	0.0	0.0	0.0	0.0	0.0	0.0	0.0	0.0
LOC283731	283731	Gene_ID	H. sapiens	283731	H. sapiens	LOC283731	uncharacterized LOC283731								0.0	0.0	0.0	0.0	0.0	0.0	0.0	0.0	0.0	0.0	0.0	0.0	0.0	0.0	0.0	0.0	0.0	0.0	0.0	0.0
LOC339059	339059	Gene_ID	H. sapiens	339059	H. sapiens	LOC339059	uncharacterized LOC339059								0.0	0.0	0.0	0.0	0.0	0.0	0.0	0.0	0.0	0.0	0.0	0.0	0.0	0.0	0.0	0.0	0.0	0.0	0.0	0.0
LOC389199	389199	Gene_ID	H. sapiens	389199	H. sapiens	LOC389199	uncharacterized LOC389199								0.0	0.0	0.0	0.0	0.0	0.0	0.0	0.0	0.0	0.0	0.0	0.0	0.0	0.0	0.0	0.0	0.0	0.0	0.0	0.0
LOC400927	400927	Gene_ID	H. sapiens	400927	H. sapiens	TPTEP2	TPTE pseudogene 2								0.0	0.0	0.0	0.0	0.0	0.0	0.0	0.0	0.0	0.0	0.0	0.0	0.0	0.0	0.0	0.0	0.0	0.0	0.0	0.0
LOC439994	439994	Gene_ID	H. sapiens	439994	H. sapiens	LINC00863	long intergenic non-protein coding RNA 863								0.0	0.0	0.0	0.0	0.0	0.0	0.0	0.0	0.0	0.0	0.0	0.0	0.0	0.0	0.0	0.0	0.0	0.0	0.0	0.0
LOC642361	642361	Gene_ID	H. sapiens	642361	H. sapiens	LOC642361	uncharacterized LOC642361								0.0	0.0	0.0	0.0	0.0	0.0	0.0	0.0	0.0	0.0	0.0	0.0	0.0	0.0	0.0	0.0	0.0	0.0	0.0	0.0
LOC643542	643542	Gene_ID	H. sapiens	643542	H. sapiens	DSEL-AS1	DSEL antisense RNA 1								0.0	0.0	0.0	0.0	0.0	0.0	0.0	0.0	0.0	0.0	0.0	0.0	0.0	0.0	0.0	0.0	0.0	0.0	0.0	0.0
LOC644936	644936	Gene_ID	H. sapiens	644936	H. sapiens	LOC644936	actin beta pseudogene								0.0	0.0	0.0	0.0	0.0	0.0	0.0	0.0	0.0	0.0	0.0	0.0	0.0	0.0	0.0	0.0	0.0	0.0	0.0	0.0
LOC728392	728392	Gene_ID	H. sapiens	728392	H. sapiens	LOC728392	uncharacterized LOC728392								0.0	0.0	0.0	0.0	0.0	0.0	0.0	0.0	0.0	0.0	0.0	0.0	0.0	0.0	0.0	0.0	0.0	0.0	0.0	0.0
LOC730183	730183	Gene_ID	H. sapiens	730183	H. sapiens	LOC730183	uncharacterized LOC730183								0.0	0.0	0.0	0.0	0.0	0.0	0.0	0.0	0.0	0.0	0.0	0.0	0.0	0.0	0.0	0.0	0.0	0.0	0.0	0.0
LOC90784	25885	Gene_ID	H. sapiens	25885	H. sapiens	POLR1A	RNA polymerase I subunit A	GO:1904750 negative regulation of protein localization to nucleolus;GO:1904749 regulation of protein localization to nucleolus;GO:1902570 protein localization to nucleolus		ENZYME proteins:Transferases; Predicted intracellular proteins; Enzymes; Disease related genes; Potential drug targets; RNA polymerase related proteins	Nucleoli fibrillar center (Enhanced); Additional: Intermediate filaments;Nucleoplasm				0.0	1.0	0.0	0.0	0.0	0.0	0.0	0.0	0.0	0.0	0.0	0.0	0.0	0.0	0.0	0.0	0.0	0.0	0.0	0.0
LONP1	9361	symbol	H. sapiens	9361	H. sapiens	LONP1	lon peptidase 1, mitochondrial	GO:0070407 oxidation-dependent protein catabolic process;GO:0010044 response to aluminum ion;GO:0032042 mitochondrial DNA metabolic process		Predicted intracellular proteins; Peptidases:Serine-type peptidases; ENZYME proteins:Hydrolases; Enzymes; Disease related genes; Potential drug targets	Mitochondria (Enhanced); Additional: Nucleoplasm			(M5934)HALLMARK XENOBIOTIC METABOLISM	0.0	0.0	0.0	1.0	0.0	0.0	0.0	0.0	0.0	0.0	0.0	0.0	0.0	1.0	0.0	0.0	0.0	0.0	0.0	0.0
LONRF2	164832	symbol	H. sapiens	164832	H. sapiens	LONRF2	LON peptidase N-terminal domain and ring finger 2			Predicted intracellular proteins	Nucleoplasm (Approved)				0.0	0.0	0.0	0.0	0.0	0.0	0.0	0.0	0.0	0.0	0.0	0.0	0.0	0.0	0.0	0.0	0.0	0.0	0.0	0.0
LPPR2	64748	gene_synonym	H. sapiens	64748	H. sapiens	PLPPR2	phospholipid phosphatase related 2	GO:0046839 phospholipid dephosphorylation;GO:0030258 lipid modification;GO:0006644 phospholipid metabolic process		ENZYME proteins:Hydrolases; Enzymes	Nucleoplasm (Uncertain)				0.0	0.0	0.0	0.0	0.0	0.0	0.0	0.0	0.0	0.0	0.0	0.0	0.0	0.0	0.0	0.0	0.0	0.0	0.0	0.0
LRP5	4041	symbol	H. sapiens	4041	H. sapiens	LRP5	LDL receptor related protein 5	GO:0060764 cell-cell signaling involved in mammary gland development;GO:0110135 Norrin signaling pathway;GO:0035426 extracellular matrix-cell signaling		Predicted intracellular proteins; Disease related genes			(M77)PID WNT SIGNALING PATHWAY; (M266)PID NCADHERIN PATHWAY; (M5493)WNT SIGNALING		0.0	1.0	0.0	0.0	0.0	0.0	1.0	0.0	0.0	0.0	0.0	0.0	0.0	0.0	0.0	1.0	0.0	1.0	0.0	0.0
LRPAP1	4043	symbol	H. sapiens	4043	H. sapiens	LRPAP1	LDL receptor related protein associated protein 1	GO:0010916 negative regulation of very-low-density lipoprotein particle clearance;GO:0010915 regulation of very-low-density lipoprotein particle clearance;GO:0034447 very-low-density lipoprotein particle clearance		Predicted intracellular proteins; Disease related genes	Endoplasmic reticulum (Supported)		(M211)PID HEDGEHOG 2PATHWAY; (M69)PID REELIN PATHWAY; (M163)PID LIS1 PATHWAY	(M5944)HALLMARK ANGIOGENESIS	0.0	0.0	0.0	0.0	0.0	0.0	0.0	0.0	0.0	0.0	0.0	0.0	0.0	0.0	0.0	0.0	0.0	0.0	0.0	0.0
LRRC17	10234	symbol	H. sapiens	10234	H. sapiens	LRRC17	leucine rich repeat containing 17	GO:0048539 bone marrow development;GO:0045671 negative regulation of osteoclast differentiation;GO:0033687 osteoblast proliferation		Predicted secreted proteins	Vesicles (Approved); Additional: Cytokinetic bridge				0.0	1.0	0.0	0.0	0.0	0.0	1.0	0.0	0.0	0.0	0.0	0.0	0.0	0.0	0.0	0.0	0.0	0.0	0.0	0.0
LRRC37A	9884	symbol	H. sapiens	9884	H. sapiens	LRRC37A	leucine rich repeat containing 37A				Vesicles (Approved)				0.0	0.0	0.0	0.0	0.0	0.0	0.0	0.0	0.0	0.0	0.0	0.0	0.0	0.0	0.0	0.0	0.0	0.0	0.0	0.0
LRRC37A2	474170	symbol	H. sapiens	474170	H. sapiens	LRRC37A2	leucine rich repeat containing 37 member A2				Vesicles (Approved)				0.0	0.0	0.0	0.0	0.0	0.0	0.0	0.0	0.0	0.0	0.0	0.0	0.0	0.0	0.0	0.0	0.0	0.0	0.0	0.0
LRRC47	57470	symbol	H. sapiens	57470	H. sapiens	LRRC47	leucine rich repeat containing 47	GO:0006432 phenylalanyl-tRNA aminoacylation;GO:0006418 tRNA aminoacylation for protein translation;GO:0043039 tRNA aminoacylation		Predicted intracellular proteins	Nucleoli fibrillar center (Approved)				1.0	0.0	0.0	0.0	0.0	0.0	0.0	0.0	0.0	1.0	0.0	0.0	0.0	0.0	0.0	0.0	0.0	0.0	0.0	0.0
LRRC4B	94030	symbol	H. sapiens	94030	H. sapiens	LRRC4B	leucine rich repeat containing 4B	GO:0099151 regulation of postsynaptic density assembly;GO:0099150 regulation of postsynaptic specialization assembly;GO:1904889 regulation of excitatory synapse assembly		Predicted intracellular proteins					0.0	0.0	0.0	0.0	0.0	0.0	0.0	0.0	0.0	0.0	0.0	0.0	0.0	0.0	0.0	0.0	0.0	0.0	0.0	0.0
LRRC56	115399	symbol	H. sapiens	115399	H. sapiens	LRRC56	leucine rich repeat containing 56	GO:0030030 cell projection organization;GO:0016043 cellular component organization;GO:0071840 cellular component organization or biogenesis		Predicted intracellular proteins					0.0	0.0	0.0	0.0	0.0	0.0	0.0	0.0	0.0	0.0	0.0	0.0	0.0	0.0	0.0	0.0	0.0	0.0	0.0	0.0
LRRC71	149499	symbol	H. sapiens	149499	H. sapiens	LRRC71	leucine rich repeat containing 71			Predicted intracellular proteins					0.0	0.0	0.0	0.0	0.0	0.0	0.0	0.0	0.0	0.0	0.0	0.0	0.0	0.0	0.0	0.0	0.0	0.0	0.0	0.0
LRRC73	221424	symbol	H. sapiens	221424	H. sapiens	LRRC73	leucine rich repeat containing 73			Predicted intracellular proteins	Cytosol (Approved)				0.0	0.0	0.0	0.0	0.0	0.0	0.0	0.0	0.0	0.0	0.0	0.0	0.0	0.0	0.0	0.0	0.0	0.0	0.0	0.0
LRRC75A	388341	symbol	H. sapiens	388341	H. sapiens	LRRC75A	leucine rich repeat containing 75A			Predicted intracellular proteins	Nucleoplasm (Approved); Additional: Cytosol;Nucleoli				0.0	0.0	0.0	0.0	0.0	0.0	0.0	0.0	0.0	0.0	0.0	0.0	0.0	0.0	0.0	0.0	0.0	0.0	0.0	0.0
LRRTM2	26045	symbol	H. sapiens	26045	H. sapiens	LRRTM2	leucine rich repeat transmembrane neuronal 2	GO:0099151 regulation of postsynaptic density assembly;GO:0099150 regulation of postsynaptic specialization assembly;GO:0002091 negative regulation of receptor internalization		Predicted intracellular proteins					0.0	0.0	0.0	0.0	0.0	0.0	0.0	0.0	0.0	0.0	0.0	0.0	0.0	0.0	0.0	0.0	0.0	0.0	0.0	0.0
LRSAM1	90678	symbol	H. sapiens	90678	H. sapiens	LRSAM1	leucine rich repeat and sterile alpha motif containing 1	GO:0070086 ubiquitin-dependent endocytosis;GO:1904415 regulation of xenophagy;GO:1904417 positive regulation of xenophagy		ENZYME proteins:Transferases; Predicted intracellular proteins; Enzymes; Disease related genes; Potential drug targets	Cytosol (Approved)				0.0	0.0	0.0	1.0	0.0	0.0	0.0	0.0	0.0	0.0	0.0	0.0	0.0	1.0	0.0	0.0	0.0	0.0	0.0	1.0
LSM12	124801	symbol	H. sapiens	124801	H. sapiens	LSM12	LSM12 homolog			Predicted intracellular proteins	Cytosol (Approved)				0.0	0.0	0.0	0.0	0.0	0.0	0.0	0.0	0.0	0.0	0.0	0.0	0.0	0.0	0.0	0.0	0.0	0.0	0.0	0.0
LSM7	51690	symbol	H. sapiens	51690	H. sapiens	LSM7	LSM7 homolog, U6 small nuclear RNA and mRNA degradation associated	GO:0000956 nuclear-transcribed mRNA catabolic process;GO:0006402 mRNA catabolic process;GO:0006401 RNA catabolic process		Predicted intracellular proteins	Nucleoli fibrillar center (Approved)			(M5926)HALLMARK MYC TARGETS V1	1.0	0.0	0.0	0.0	0.0	0.0	0.0	0.0	0.0	0.0	0.0	0.0	0.0	0.0	0.0	0.0	0.0	0.0	0.0	0.0
LTB4R2	56413	symbol	H. sapiens	56413	H. sapiens	LTB4R2	leukotriene B4 receptor 2	GO:0061737 leukotriene signaling pathway;GO:0051546 keratinocyte migration;GO:0007194 negative regulation of adenylate cyclase activity		G-protein coupled receptors:Adenosine and adenine nucleotide receptors; G-protein coupled receptors:GPCRs excl olfactory receptors	Plasma membrane (Supported); Additional: Nucleoplasm	Amelubant; Leukotriene B4			0.0	0.0	0.0	0.0	0.0	0.0	0.0	0.0	0.0	0.0	0.0	0.0	0.0	0.0	0.0	0.0	0.0	0.0	0.0	0.0
LTBP3	4054	symbol	H. sapiens	4054	H. sapiens	LTBP3	latent transforming growth factor beta binding protein 3	GO:2000741 positive regulation of mesenchymal stem cell differentiation;GO:1902462 positive regulation of mesenchymal stem cell proliferation;GO:1902460 regulation of mesenchymal stem cell proliferation		Predicted intracellular proteins; Predicted secreted proteins; Disease related genes			(M3008)NABA ECM GLYCOPROTEINS; (M5884)NABA CORE MATRISOME; (M5889)NABA MATRISOME		0.0	0.0	0.0	0.0	0.0	0.0	1.0	0.0	0.0	0.0	0.0	0.0	0.0	0.0	0.0	0.0	0.0	0.0	0.0	0.0
LTC4S	4056	symbol	H. sapiens	4056	H. sapiens	LTC4S	leukotriene C4 synthase	GO:0019370 leukotriene biosynthetic process;GO:0042759 long-chain fatty acid biosynthetic process;GO:0006691 leukotriene metabolic process		Enzymes; Potential drug targets; ENZYME proteins:Lyases; Disease related genes	Nucleoplasm (Approved); Additional: Cytosol;Endoplasmic reticulum	Glutathione; Azelastine		(M5935)HALLMARK FATTY ACID METABOLISM; (M5905)HALLMARK ADIPOGENESIS	0.0	0.0	0.0	0.0	0.0	0.0	0.0	0.0	0.0	0.0	0.0	0.0	0.0	0.0	0.0	0.0	0.0	0.0	0.0	0.0
LUC7L2	51631	symbol	H. sapiens	51631	H. sapiens	LUC7L2	LUC7 like 2, pre-mRNA splicing factor	GO:0006376 mRNA splice site selection;GO:0000245 spliceosomal complex assembly;GO:0022618 ribonucleoprotein complex assembly		Predicted intracellular proteins	Nucleoplasm (Approved)				1.0	0.0	0.0	0.0	0.0	0.0	0.0	0.0	0.0	1.0	0.0	0.0	0.0	0.0	0.0	0.0	0.0	0.0	0.0	0.0
LYPD1	116372	symbol	H. sapiens	116372	H. sapiens	LYPD1	LY6/PLAUR domain containing 1	GO:0095500 acetylcholine receptor signaling pathway;GO:1905144 response to acetylcholine;GO:1905145 cellular response to acetylcholine		Predicted intracellular proteins	Nucleoplasm (Approved); Additional: Plasma membrane;Vesicles				0.0	0.0	0.0	0.0	0.0	0.0	0.0	0.0	0.0	0.0	0.0	0.0	0.0	0.0	0.0	0.0	0.0	0.0	0.0	0.0
LZTR1	8216	symbol	H. sapiens	8216	H. sapiens	LZTR1	leucine zipper like transcription regulator 1	GO:0046580 negative regulation of Ras protein signal transduction;GO:0051058 negative regulation of small GTPase mediated signal transduction;GO:0046578 regulation of Ras protein signal transduction		Cancer-related genes:Mutational cancer driver genes; Disease related genes; Predicted intracellular proteins	Nucleoplasm (Approved); Additional: Centrosome;Cytosol				0.0	1.0	0.0	0.0	0.0	0.0	0.0	0.0	0.0	0.0	0.0	1.0	0.0	0.0	0.0	0.0	0.0	0.0	0.0	0.0
MACROD1	28992	symbol	H. sapiens	28992	H. sapiens	MACROD1	mono-ADP ribosylhydrolase 1	GO:0140291 peptidyl-glutamate ADP-deribosylation;GO:0051725 protein de-ADP-ribosylation;GO:0042278 purine nucleoside metabolic process		Predicted intracellular proteins; Disease related genes	Nucleoplasm (Supported)				0.0	0.0	0.0	0.0	0.0	0.0	0.0	0.0	0.0	0.0	0.0	0.0	0.0	0.0	0.0	0.0	0.0	0.0	0.0	0.0
MAD1L1	8379	symbol	H. sapiens	8379	H. sapiens	MAD1L1	mitotic arrest deficient 1 like 1	GO:0090235 regulation of metaphase plate congression;GO:0051315 attachment of mitotic spindle microtubules to kinetochore;GO:0008608 attachment of spindle microtubules to kinetochore		Predicted intracellular proteins; Disease related genes	Nuclear membrane;Nucleoplasm (Supported)		(M195)PID CMYB PATHWAY		0.0	1.0	0.0	0.0	0.0	0.0	0.0	0.0	0.0	0.0	0.0	0.0	0.0	0.0	0.0	0.0	0.0	0.0	0.0	0.0
MAF1	84232	symbol	H. sapiens	84232	H. sapiens	MAF1	MAF1 homolog, negative regulator of RNA polymerase III	GO:0016480 negative regulation of transcription by RNA polymerase III;GO:0016479 negative regulation of transcription by RNA polymerase I;GO:0006359 regulation of transcription by RNA polymerase III		Predicted intracellular proteins	Nucleoplasm (Supported); Additional: Nucleoli;Vesicles				0.0	0.0	0.0	0.0	0.0	0.0	0.0	0.0	0.0	0.0	0.0	0.0	0.0	0.0	0.0	0.0	0.0	1.0	0.0	0.0
MAFF	23764	symbol	H. sapiens	23764	H. sapiens	MAFF	MAF bZIP transcription factor F	GO:0007567 parturition;GO:0045604 regulation of epidermal cell differentiation;GO:0045682 regulation of epidermis development		Predicted intracellular proteins; Transcription factors:Basic domains	Nucleoplasm (Approved); Additional: Mitochondria			(M5946)HALLMARK COAGULATION; (M5947)HALLMARK IL2 STAT5 SIGNALING; (M5890)HALLMARK TNFA SIGNALING VIA NFKB	0.0	0.0	0.0	0.0	0.0	0.0	0.0	1.0	0.0	0.0	1.0	0.0	0.0	0.0	0.0	0.0	0.0	0.0	0.0	0.0
MAFG	4097	symbol	H. sapiens	4097	H. sapiens	MAFG	MAF bZIP transcription factor G	GO:0045604 regulation of epidermal cell differentiation;GO:0045682 regulation of epidermis development;GO:0030641 regulation of cellular pH		Predicted intracellular proteins; Transcription factors:Basic domains			(M167)PID AP1 PATHWAY		0.0	0.0	0.0	0.0	0.0	0.0	0.0	1.0	0.0	0.0	0.0	0.0	0.0	0.0	0.0	0.0	0.0	0.0	0.0	0.0
MAFG-AS1	92659	gene_synonym	H. sapiens	92659	H. sapiens	MAFG-DT	MAFG divergent transcript								0.0	0.0	0.0	0.0	0.0	0.0	0.0	0.0	0.0	0.0	0.0	0.0	0.0	0.0	0.0	0.0	0.0	0.0	0.0	0.0
MAFK	7975	symbol	H. sapiens	7975	H. sapiens	MAFK	MAF bZIP transcription factor K	GO:0000122 negative regulation of transcription by RNA polymerase II;GO:0045892 negative regulation of transcription, DNA-templated;GO:1903507 negative regulation of nucleic acid-templated transcription		Predicted intracellular proteins; Transcription factors:Basic domains	Nucleoplasm (Enhanced)				1.0	0.0	0.0	0.0	0.0	0.0	0.0	1.0	0.0	0.0	0.0	0.0	0.0	0.0	0.0	0.0	0.0	1.0	0.0	0.0
MAGEF1	64110	symbol	H. sapiens	64110	H. sapiens	MAGEF1	MAGE family member F1	GO:0097428 protein maturation by iron-sulfur cluster transfer;GO:2000042 negative regulation of double-strand break repair via homologous recombination;GO:2000780 negative regulation of double-strand break repair		Predicted intracellular proteins	Actin filaments (Approved)				0.0	0.0	0.0	0.0	0.0	0.0	0.0	0.0	0.0	0.0	0.0	0.0	0.0	1.0	0.0	0.0	1.0	0.0	0.0	1.0
MALAT1	378938	symbol	H. sapiens	378938	H. sapiens	MALAT1	metastasis associated lung adenocarcinoma transcript 1	GO:0110024 positive regulation of cardiac muscle myoblast proliferation;GO:0110021 cardiac muscle myoblast proliferation;GO:0110022 regulation of cardiac muscle myoblast proliferation							0.0	0.0	0.0	0.0	0.0	0.0	0.0	0.0	0.0	0.0	0.0	0.0	0.0	0.0	0.0	0.0	0.0	0.0	0.0	0.0
MALSU1	115416	symbol	H. sapiens	115416	H. sapiens	MALSU1	mitochondrial assembly of ribosomal large subunit 1	GO:0070130 negative regulation of mitochondrial translation;GO:0090071 negative regulation of ribosome biogenesis;GO:0090069 regulation of ribosome biogenesis		Predicted intracellular proteins	Mitochondria (Enhanced)				1.0	0.0	0.0	0.0	0.0	0.0	0.0	0.0	0.0	1.0	0.0	0.0	0.0	0.0	0.0	0.0	0.0	0.0	0.0	0.0
MAMDC2	256691	symbol	H. sapiens	256691	H. sapiens	MAMDC2	MAM domain containing 2			Predicted secreted proteins	Nuclear speckles;Plasma membrane (Approved)				0.0	0.0	0.0	0.0	0.0	0.0	0.0	0.0	0.0	0.0	0.0	0.0	0.0	0.0	0.0	0.0	0.0	0.0	0.0	0.0
MAN2B1	4125	symbol	H. sapiens	4125	H. sapiens	MAN2B1	mannosidase alpha class 2B member 1	GO:0006013 mannose metabolic process;GO:0006517 protein deglycosylation;GO:0019318 hexose metabolic process		Predicted intracellular proteins; ENZYME proteins:Hydrolases; Enzymes; Disease related genes; Potential drug targets	Nucleoplasm;Vesicles (Approved)				0.0	0.0	0.0	0.0	0.0	0.0	0.0	0.0	0.0	0.0	0.0	0.0	0.0	0.0	0.0	0.0	0.0	0.0	0.0	0.0
MAP1LC3A	84557	symbol	H. sapiens	84557	H. sapiens	MAP1LC3A	microtubule associated protein 1 light chain 3 alpha	GO:0010040 response to iron(II) ion;GO:0006995 cellular response to nitrogen starvation;GO:0043562 cellular response to nitrogen levels		Predicted intracellular proteins	Vesicles (Approved)				0.0	0.0	0.0	1.0	0.0	0.0	0.0	0.0	0.0	0.0	0.0	0.0	0.0	0.0	0.0	0.0	0.0	0.0	0.0	0.0
MAP2K2	5605	symbol	H. sapiens	5605	H. sapiens	MAP2K2	mitogen-activated protein kinase kinase 2	GO:0090170 regulation of Golgi inheritance;GO:0036289 peptidyl-serine autophosphorylation;GO:1903800 positive regulation of production of miRNAs involved in gene silencing by miRNA	STE Ser/Thr protein kinase family	Cancer-related genes:Candidate cancer biomarkers; ENZYME proteins:Transferases; RAS pathway related proteins; Predicted intracellular proteins; FDA approved drug targets:Small molecule drugs; Enzymes; Disease related genes; Kinases:STE Ser/Thr protein kinases	Cytosol (Supported)	Bosutinib; Trametinib; Selumetinib; Binimetinib; Fostamatinib	(M18895)SA TRKA RECEPTOR; (M267)PID ANTHRAX PATHWAY; (M213)PID AR NONGENOMIC PATHWAY		1.0	0.0	0.0	0.0	0.0	1.0	0.0	0.0	0.0	0.0	0.0	0.0	1.0	0.0	0.0	0.0	1.0	1.0	1.0	0.0
MAP3K10	4294	symbol	H. sapiens	4294	H. sapiens	MAP3K10	mitogen-activated protein kinase kinase kinase 10	GO:0043507 positive regulation of JUN kinase activity;GO:0043506 regulation of JUN kinase activity;GO:0046330 positive regulation of JNK cascade	STE Ser/Thr protein kinase family	ENZYME proteins:Transferases; Predicted intracellular proteins; Kinases:STE Ser/Thr protein kinases; Enzymes	Actin filaments;Cytosol;Nucleoplasm (Approved)	Fostamatinib	(M20)PID P38 MKK3 6PATHWAY; (M12012)ST P38 MAPK PATHWAY; (M3721)ST JNK MAPK PATHWAY		0.0	0.0	0.0	0.0	0.0	0.0	0.0	0.0	0.0	0.0	0.0	0.0	0.0	0.0	0.0	0.0	1.0	0.0	0.0	0.0
MAP6D1	79929	symbol	H. sapiens	79929	H. sapiens	MAP6D1	MAP6 domain containing 1	GO:0018009 N-terminal peptidyl-L-cysteine N-palmitoylation;GO:0006500 N-terminal protein palmitoylation;GO:0006498 N-terminal protein lipidation		Predicted intracellular proteins	Cytosol (Approved)				0.0	0.0	0.0	0.0	0.0	0.0	0.0	0.0	0.0	0.0	0.0	0.0	0.0	0.0	0.0	0.0	0.0	0.0	0.0	0.0
MAP7D1	55700	symbol	H. sapiens	55700	H. sapiens	MAP7D1	MAP7 domain containing 1	GO:0000226 microtubule cytoskeleton organization;GO:0007017 microtubule-based process;GO:0007010 cytoskeleton organization		Predicted intracellular proteins	Cytosol;Microtubules (Approved)				0.0	0.0	0.0	0.0	0.0	0.0	0.0	0.0	0.0	0.0	0.0	0.0	0.0	0.0	0.0	0.0	0.0	0.0	0.0	0.0
MAPK11	5600	symbol	H. sapiens	5600	H. sapiens	MAPK11	mitogen-activated protein kinase 11	GO:0060044 negative regulation of cardiac muscle cell proliferation;GO:0055022 negative regulation of cardiac muscle tissue growth;GO:0061117 negative regulation of heart growth	CMGC Ser/Thr protein kinase family	ENZYME proteins:Transferases; Predicted intracellular proteins; FDA approved drug targets:Small molecule drugs; Kinases:CMGC Ser/Thr protein kinases; Enzymes	Mitochondria (Approved)	KC706; Regorafenib	(M199)PID P38 MK2 PATHWAY; (M274)PID LYMPH ANGIOGENESIS PATHWAY; (M20)PID P38 MKK3 6PATHWAY	(M5915)HALLMARK APICAL JUNCTION	1.0	1.0	0.0	0.0	0.0	0.0	1.0	0.0	0.0	0.0	1.0	0.0	0.0	0.0	0.0	0.0	0.0	1.0	1.0	0.0
MAPK8IP1	9479	symbol	H. sapiens	9479	H. sapiens	MAPK8IP1	mitogen-activated protein kinase 8 interacting protein 1	GO:0007258 JUN phosphorylation;GO:0035740 CD8-positive, alpha-beta T cell proliferation;GO:2000564 regulation of CD8-positive, alpha-beta T cell proliferation		Cancer-related genes:Mutational cancer driver genes; Disease related genes; Predicted intracellular proteins	Plasma membrane (Enhanced)	Pyrazolanthrone; 6-CHLORO-9-HYDROXY-1,3-DIMETHYL-1,9-DIHYDRO-4H-PYRAZOLO[3,4-B]QUINOLIN-4-ONE; N-(4-AMINO-5-CYANO-6-ETHOXYPYRIDIN-2-YL)-2-(4-BROMO-2,5-DIMETHOXYPHENYL)ACETAMIDE; 5-CYANO-N-(2,5-DIMETHOXYBENZYL)-6-ETHOXYPYRIDINE-2-CARBOXAMIDE; Anthralin	(M7871)ST GRANULE CELL SURVIVAL PATHWAY; (M12705)SIG CD40PATHWAYMAP; (M2579)ST DIFFERENTIATION PATHWAY IN PC12 CELLS		0.0	0.0	0.0	0.0	0.0	0.0	0.0	0.0	0.0	0.0	0.0	1.0	0.0	0.0	0.0	0.0	1.0	0.0	0.0	0.0
MARS	4141	gene_synonym	H. sapiens	4141	H. sapiens	MARS1	methionyl-tRNA synthetase 1	GO:0006431 methionyl-tRNA aminoacylation;GO:1901838 positive regulation of transcription of nucleolar large rRNA by RNA polymerase I;GO:1901836 regulation of transcription of nucleolar large rRNA by RNA polymerase I		ENZYME proteins:Ligase; Predicted intracellular proteins; Enzymes; Disease related genes; Potential drug targets	Cytosol (Enhanced)				1.0	0.0	0.0	0.0	0.0	0.0	0.0	0.0	0.0	1.0	0.0	0.0	0.0	0.0	0.0	0.0	0.0	0.0	0.0	0.0
MAST3	23031	symbol	H. sapiens	23031	H. sapiens	MAST3	microtubule associated serine/threonine kinase 3	GO:0018105 peptidyl-serine phosphorylation;GO:0018209 peptidyl-serine modification;GO:0018193 peptidyl-amino acid modification	AGC Ser/Thr protein kinase family	ENZYME proteins:Transferases; Predicted intracellular proteins; Kinases:AGC Ser/Thr protein kinases; Enzymes	Nuclear speckles (Approved)			(M5956)HALLMARK KRAS SIGNALING DN	0.0	0.0	0.0	0.0	0.0	0.0	0.0	0.0	0.0	0.0	0.0	0.0	0.0	0.0	0.0	0.0	0.0	0.0	0.0	0.0
MAX	4149	symbol	H. sapiens	4149	H. sapiens	MAX	MYC associated factor X	GO:0048678 response to axon injury;GO:0060041 retina development in camera-type eye;GO:0009267 cellular response to starvation		Cancer-related genes:Mutational cancer driver genes; Transcription factors:Basic domains; Disease related genes; Predicted intracellular proteins	Nucleoplasm (Supported); Additional: Golgi apparatus;Vesicles		(M139)PID MYC PATHWAY; (M254)PID MYC REPRESS PATHWAY; (M101)PID HDAC CLASSI PATHWAY		0.0	1.0	0.0	0.0	0.0	0.0	0.0	1.0	0.0	0.0	0.0	0.0	0.0	0.0	0.0	0.0	0.0	1.0	0.0	0.0
MBLAC1	255374	symbol	H. sapiens	255374	H. sapiens	MBLAC1	metallo-beta-lactamase domain containing 1			Predicted intracellular proteins					0.0	0.0	0.0	0.0	0.0	0.0	0.0	0.0	0.0	0.0	0.0	0.0	0.0	0.0	0.0	0.0	0.0	0.0	0.0	0.0
MCAT	27349	symbol	H. sapiens	27349	H. sapiens	MCAT	malonyl-CoA-acyl carrier protein transacylase	GO:0006635 fatty acid beta-oxidation;GO:0009062 fatty acid catabolic process;GO:0019395 fatty acid oxidation		ENZYME proteins:Transferases; Predicted intracellular proteins; Enzymes	Mitochondria (Supported)	3,6,9,12,15-PENTAOXAHEPTADECAN-1-OL			0.0	0.0	0.0	0.0	0.0	0.0	0.0	0.0	0.0	0.0	0.0	0.0	0.0	0.0	0.0	0.0	0.0	0.0	0.0	0.0
MDGA1	266727	symbol	H. sapiens	266727	H. sapiens	MDGA1	MAM domain containing glycosylphosphatidylinositol anchor 1	GO:0099179 regulation of synaptic membrane adhesion;GO:0021527 spinal cord association neuron differentiation;GO:0021516 dorsal spinal cord development		Predicted intracellular proteins	Plasma membrane (Supported); Additional: Golgi apparatus			(M5916)HALLMARK APICAL SURFACE	0.0	0.0	0.0	0.0	0.0	0.0	0.0	0.0	0.0	0.0	0.0	0.0	0.0	0.0	0.0	0.0	0.0	0.0	0.0	0.0
MDK	4192	symbol	H. sapiens	4192	H. sapiens	MDK	midkine	GO:0030421 defecation;GO:0106091 glial cell projection elongation;GO:1905555 positive regulation of blood vessel branching		Cancer-related genes:Candidate cancer biomarkers; Predicted secreted proteins	Vesicles (Approved)		(M165)PID SYNDECAN 4 PATHWAY; (M277)PID INTEGRIN A4B1 PATHWAY; (M18)PID INTEGRIN1 PATHWAY	(M5907)HALLMARK ESTROGEN RESPONSE LATE; (M5915)HALLMARK APICAL JUNCTION	0.0	1.0	0.0	0.0	0.0	0.0	1.0	0.0	0.0	0.0	0.0	0.0	0.0	0.0	0.0	1.0	0.0	0.0	0.0	0.0
MDP1	145553	symbol	H. sapiens	145553	H. sapiens	MDP1	magnesium dependent phosphatase 1	GO:0030389 fructosamine metabolic process;GO:0006040 amino sugar metabolic process;GO:0035335 peptidyl-tyrosine dephosphorylation		Predicted intracellular proteins; ENZYME proteins:Hydrolases; Enzymes	Nucleoplasm (Approved)				0.0	0.0	0.0	0.0	0.0	0.0	0.0	0.0	0.0	0.0	0.0	0.0	0.0	0.0	0.0	0.0	0.0	0.0	0.0	0.0
MED14OS	100873985	symbol	H. sapiens	100873985	H. sapiens	MED14OS	MED14 opposite strand								0.0	0.0	0.0	0.0	0.0	0.0	0.0	0.0	0.0	0.0	0.0	0.0	0.0	0.0	0.0	0.0	0.0	0.0	0.0	0.0
MEF2D	4209	symbol	H. sapiens	4209	H. sapiens	MEF2D	myocyte enhancer factor 2D	GO:0007512 adult heart development;GO:0001958 endochondral ossification;GO:0036075 replacement ossification		Transcription factors:alpha-Helices exposed by beta-structures; Predicted intracellular proteins	Nucleoplasm (Enhanced); Additional: Vesicles		(M32)PID HDAC CLASSIII PATHWAY; (M113)PID NFAT 3PATHWAY	(M5909)HALLMARK MYOGENESIS	1.0	0.0	0.0	0.0	0.0	0.0	0.0	0.0	0.0	0.0	1.0	0.0	0.0	0.0	0.0	0.0	0.0	0.0	0.0	0.0
MEGF8	1954	symbol	H. sapiens	1954	H. sapiens	MEGF8	multiple EGF like domains 8	GO:0055113 epiboly involved in gastrulation with mouth forming second;GO:0097155 fasciculation of sensory neuron axon;GO:0060971 embryonic heart tube left/right pattern formation		Predicted intracellular proteins; Disease related genes			(M5883)NABA SECRETED FACTORS; (M5885)NABA MATRISOME ASSOCIATED; (M5889)NABA MATRISOME		0.0	0.0	0.0	0.0	0.0	0.0	0.0	0.0	0.0	0.0	1.0	0.0	0.0	0.0	0.0	0.0	0.0	0.0	0.0	0.0
MESDC1	59274	gene_synonym	H. sapiens	59274	H. sapiens	TLNRD1	talin rod domain containing 1			Predicted intracellular proteins	Cytoplasmic bodies;Nucleoplasm (Approved)				0.0	0.0	0.0	0.0	0.0	0.0	0.0	0.0	0.0	0.0	0.0	0.0	0.0	0.0	0.0	0.0	0.0	0.0	0.0	0.0
MESP1	55897	symbol	H. sapiens	55897	H. sapiens	MESP1	mesoderm posterior bHLH transcription factor 1	GO:0003235 sinus venosus development;GO:0003236 sinus venosus morphogenesis;GO:0003259 cardioblast anterior-lateral migration		Predicted intracellular proteins; Transcription factors:Basic domains	Nucleoplasm (Supported); Additional: Nucleoli				0.0	0.0	0.0	0.0	0.0	0.0	1.0	0.0	0.0	0.0	1.0	0.0	0.0	0.0	0.0	1.0	0.0	0.0	0.0	0.0
MEST	4232	symbol	H. sapiens	4232	H. sapiens	MEST	mesoderm specific transcript	GO:0010883 regulation of lipid storage;GO:0019915 lipid storage;GO:0007498 mesoderm development		Predicted intracellular proteins	Cytosol;Golgi apparatus (Approved)			(M5907)HALLMARK ESTROGEN RESPONSE LATE; (M5930)HALLMARK EPITHELIAL MESENCHYMAL TRANSITION	0.0	0.0	0.0	0.0	0.0	0.0	0.0	0.0	0.0	0.0	0.0	0.0	0.0	0.0	0.0	0.0	0.0	0.0	0.0	0.0
METRN	79006	symbol	H. sapiens	79006	H. sapiens	METRN	meteorin, glial cell differentiation regulator	GO:0050772 positive regulation of axonogenesis;GO:0050770 regulation of axonogenesis;GO:0010001 glial cell differentiation		Predicted intracellular proteins; Predicted secreted proteins	Nuclear membrane (Approved); Additional: Cytosol;Nucleoplasm				0.0	0.0	0.0	0.0	0.0	0.0	0.0	0.0	0.0	0.0	0.0	0.0	0.0	0.0	0.0	0.0	0.0	0.0	0.0	0.0
METTL2A	339175	symbol	H. sapiens	339175	H. sapiens	METTL2A	methyltransferase 2A, methylcytidine	GO:0030488 tRNA methylation;GO:0001510 RNA methylation;GO:0006400 tRNA modification		Predicted intracellular proteins					0.0	0.0	0.0	0.0	0.0	0.0	0.0	0.0	0.0	1.0	0.0	0.0	0.0	0.0	0.0	0.0	0.0	0.0	0.0	0.0
MEX3D	399664	symbol	H. sapiens	399664	H. sapiens	MEX3D	mex-3 RNA binding family member D	GO:0010609 mRNA localization resulting in posttranscriptional regulation of gene expression;GO:0008298 intracellular mRNA localization;GO:0061157 mRNA destabilization		Predicted intracellular proteins					1.0	0.0	0.0	0.0	0.0	0.0	0.0	0.0	0.0	0.0	0.0	0.0	0.0	0.0	0.0	0.0	0.0	0.0	0.0	1.0
MFHAS1	9258	symbol	H. sapiens	9258	H. sapiens	MFHAS1	multifunctional ROCO family signaling regulator 1	GO:0034137 positive regulation of toll-like receptor 2 signaling pathway;GO:0034136 negative regulation of toll-like receptor 2 signaling pathway;GO:0034135 regulation of toll-like receptor 2 signaling pathway		Predicted intracellular proteins; Disease related genes	Nucleoplasm (Approved); Additional: Cytosol			(M5945)HALLMARK HEME METABOLISM	0.0	0.0	0.0	0.0	0.0	0.0	1.0	0.0	0.0	0.0	0.0	0.0	0.0	0.0	0.0	0.0	1.0	0.0	0.0	0.0
MFI2	4241	gene_synonym	H. sapiens	4241	H. sapiens	MELTF	melanotransferrin	GO:0010756 positive regulation of plasminogen activation;GO:0090091 positive regulation of extracellular matrix disassembly;GO:0010755 regulation of plasminogen activation		Predicted intracellular proteins; CD markers					0.0	0.0	0.0	0.0	0.0	0.0	1.0	0.0	0.0	0.0	0.0	0.0	0.0	0.0	0.0	0.0	0.0	0.0	0.0	1.0
MFSD12	126321	symbol	H. sapiens	126321	H. sapiens	MFSD12	major facilitator superfamily domain containing 12	GO:0042883 cysteine transport;GO:1903712 cysteine transmembrane transport;GO:0043474 pigment metabolic process involved in pigmentation		Predicted intracellular proteins	Mitochondria (Approved); Additional: Nucleoplasm				0.0	0.0	0.0	0.0	0.0	0.0	0.0	0.0	0.0	0.0	0.0	0.0	0.0	0.0	0.0	0.0	0.0	0.0	0.0	0.0
MGAM	8972	symbol	H. sapiens	8972	H. sapiens	MGAM	maltase-glucoamylase	GO:0005982 starch metabolic process;GO:0005983 starch catabolic process;GO:0000023 maltose metabolic process		FDA approved drug targets:Small molecule drugs; ENZYME proteins:Hydrolases; Enzymes		Acarbose; Miglitol; Voglibose			0.0	0.0	0.0	0.0	0.0	0.0	0.0	0.0	0.0	0.0	0.0	0.0	0.0	0.0	0.0	0.0	0.0	0.0	0.0	0.0
MGAT2	4247	symbol	H. sapiens	4247	H. sapiens	MGAT2	alpha-1,6-mannosyl-glycoprotein 2-beta-N-acetylglucosaminyltransferase	GO:0018279 protein N-linked glycosylation via asparagine;GO:0018196 peptidyl-asparagine modification;GO:0009312 oligosaccharide biosynthetic process		ENZYME proteins:Transferases; Predicted intracellular proteins; Enzymes; Disease related genes; Potential drug targets	Golgi apparatus (Supported)				0.0	0.0	0.0	0.0	0.0	0.0	0.0	0.0	0.0	0.0	0.0	0.0	0.0	0.0	0.0	0.0	0.0	0.0	0.0	0.0
MGC72080						None	None	None	None	None	None	None	None	None	nan	nan	nan	nan	nan	nan	nan	nan	nan	nan	nan	nan	nan	nan	nan	nan	nan	nan	nan	nan
MGP	4256	symbol	H. sapiens	4256	H. sapiens	MGP	matrix Gla protein	GO:0001502 cartilage condensation;GO:0098743 cell aggregation;GO:0030500 regulation of bone mineralization		Predicted intracellular proteins; Predicted secreted proteins; Disease related genes		Calcium	(M65)PID FRA PATHWAY; (M3008)NABA ECM GLYCOPROTEINS; (M5884)NABA CORE MATRISOME	(M5930)HALLMARK EPITHELIAL MESENCHYMAL TRANSITION	0.0	0.0	0.0	0.0	0.0	0.0	0.0	0.0	0.0	0.0	0.0	0.0	0.0	0.0	0.0	0.0	0.0	0.0	0.0	0.0
MGRN1	23295	symbol	H. sapiens	23295	H. sapiens	MGRN1	mahogunin ring finger 1	GO:0043951 negative regulation of cAMP-mediated signaling;GO:0045879 negative regulation of smoothened signaling pathway;GO:0043949 regulation of cAMP-mediated signaling		ENZYME proteins:Transferases; Predicted intracellular proteins; Enzymes	Vesicles (Supported); Additional: Endoplasmic reticulum				0.0	0.0	0.0	0.0	0.0	0.0	0.0	0.0	0.0	0.0	0.0	1.0	0.0	1.0	0.0	0.0	0.0	0.0	0.0	0.0
MIB2	142678	symbol	H. sapiens	142678	H. sapiens	MIB2	MIB E3 ubiquitin protein ligase 2	GO:0007219 Notch signaling pathway;GO:0043123 positive regulation of I-kappaB kinase/NF-kappaB signaling;GO:0043122 regulation of I-kappaB kinase/NF-kappaB signaling		ENZYME proteins:Transferases; Predicted intracellular proteins; Enzymes					0.0	1.0	0.0	0.0	0.0	0.0	0.0	0.0	0.0	0.0	0.0	0.0	0.0	1.0	0.0	0.0	0.0	1.0	0.0	0.0
MICAL2	9645	symbol	H. sapiens	9645	H. sapiens	MICAL2	microtubule associated monooxygenase, calponin and LIM domain containing 2	GO:0019417 sulfur oxidation;GO:0010735 positive regulation of transcription via serum response element binding;GO:0030042 actin filament depolymerization		Predicted intracellular proteins; Enzymes; ENZYME proteins:Oxidoreductases	Cytosol;Golgi apparatus (Uncertain); Additional: Nucleoplasm;Plasma membrane				0.0	0.0	0.0	0.0	0.0	0.0	0.0	0.0	0.0	0.0	1.0	0.0	1.0	0.0	0.0	0.0	0.0	0.0	0.0	0.0
MID1IP1	58526	symbol	H. sapiens	58526	H. sapiens	MID1IP1	MID1 interacting protein 1	GO:0051351 positive regulation of ligase activity;GO:0051340 regulation of ligase activity;GO:0045723 positive regulation of fatty acid biosynthetic process		Predicted intracellular proteins				(M5893)HALLMARK MITOTIC SPINDLE	0.0	0.0	0.0	0.0	0.0	0.0	0.0	0.0	0.0	0.0	0.0	0.0	0.0	0.0	0.0	0.0	0.0	0.0	0.0	0.0
MIDN	90007	symbol	H. sapiens	90007	H. sapiens	MIDN	midnolin	GO:0033132 negative regulation of glucokinase activity;GO:1903300 negative regulation of hexokinase activity;GO:0033131 regulation of glucokinase activity		Predicted intracellular proteins	Nucleoplasm (Approved)				0.0	0.0	0.0	0.0	0.0	0.0	0.0	0.0	0.0	0.0	0.0	0.0	0.0	0.0	0.0	0.0	0.0	0.0	0.0	0.0
MINOS1P1	100462953	gene_synonym	H. sapiens	100462953	H. sapiens	MICOS10P1	MICOS10 pseudogene 1								0.0	0.0	0.0	0.0	0.0	0.0	0.0	0.0	0.0	0.0	0.0	0.0	0.0	0.0	0.0	0.0	0.0	0.0	0.0	0.0
MIR143HG	728264	gene_synonym	H. sapiens	728264	H. sapiens	CARMN	cardiac mesoderm enhancer-associated non-coding RNA	GO:0035195 gene silencing by miRNA;GO:0035194 post-transcriptional gene silencing by RNA;GO:0016441 posttranscriptional gene silencing							0.0	0.0	0.0	0.0	0.0	0.0	0.0	0.0	0.0	0.0	0.0	0.0	0.0	0.0	0.0	0.0	0.0	0.0	0.0	0.0
MIR181A1HG	100131234	symbol	H. sapiens	100131234	H. sapiens	MIR181A1HG	MIR181A1 host gene								0.0	0.0	0.0	0.0	0.0	0.0	0.0	0.0	0.0	0.0	0.0	0.0	0.0	0.0	0.0	0.0	0.0	0.0	0.0	0.0
MIR3196	100423014	symbol	H. sapiens	100423014	H. sapiens	MIR3196	microRNA 3196								0.0	0.0	0.0	0.0	0.0	0.0	0.0	0.0	0.0	0.0	0.0	0.0	0.0	0.0	0.0	0.0	0.0	0.0	0.0	0.0
MIR4466	100616154	symbol	H. sapiens	100616154	H. sapiens	MIR4466	microRNA 4466								0.0	0.0	0.0	0.0	0.0	0.0	0.0	0.0	0.0	0.0	0.0	0.0	0.0	0.0	0.0	0.0	0.0	0.0	0.0	0.0
MIR4532						None	None	None	None	None	None	None	None	None	nan	nan	nan	nan	nan	nan	nan	nan	nan	nan	nan	nan	nan	nan	nan	nan	nan	nan	nan	nan
MIR663A	724033	symbol	H. sapiens	724033	H. sapiens	MIR663A	microRNA 663a	GO:0035195 gene silencing by miRNA;GO:0035194 post-transcriptional gene silencing by RNA;GO:0016441 posttranscriptional gene silencing							0.0	0.0	0.0	0.0	0.0	0.0	0.0	0.0	0.0	0.0	0.0	0.0	0.0	0.0	0.0	0.0	0.0	0.0	0.0	0.0
MIR663AHG	284801	symbol	H. sapiens	284801	H. sapiens	MIR663AHG	MIR663A host gene								0.0	0.0	0.0	0.0	0.0	0.0	0.0	0.0	0.0	0.0	0.0	0.0	0.0	0.0	0.0	0.0	0.0	0.0	0.0	0.0
MIRLET7BHG	400931	symbol	H. sapiens	400931	H. sapiens	MIRLET7BHG	MIRLET7B host gene	GO:0035195 gene silencing by miRNA;GO:0035194 post-transcriptional gene silencing by RNA;GO:0016441 posttranscriptional gene silencing							0.0	0.0	0.0	0.0	0.0	0.0	0.0	0.0	0.0	0.0	0.0	0.0	0.0	0.0	0.0	0.0	0.0	0.0	0.0	0.0
MKL1	57591	gene_synonym	H. sapiens	57591	H. sapiens	MRTFA	myocardin related transcription factor A	GO:0010735 positive regulation of transcription via serum response element binding;GO:0044319 wound healing, spreading of cells;GO:0090505 epiboly involved in wound healing		Predicted intracellular proteins; Disease related genes; Cancer-related genes	Nucleoplasm (Supported); Additional: Cytosol	Latrunculin B	(M12)PID RHOA PATHWAY		0.0	1.0	0.0	0.0	0.0	0.0	0.0	0.0	0.0	0.0	1.0	0.0	0.0	0.0	0.0	0.0	0.0	0.0	0.0	0.0
MKNK2	2872	symbol	H. sapiens	2872	H. sapiens	MKNK2	MAPK interacting serine/threonine kinase 2	GO:0071243 cellular response to arsenic-containing substance;GO:0046685 response to arsenic-containing substance;GO:0038034 signal transduction in absence of ligand	CAMK Ser/Thr protein kinase family	ENZYME proteins:Transferases; Kinases:CAMK Ser/Thr protein kinases; Enzymes; Predicted intracellular proteins	Nuclear bodies (Supported)	Fostamatinib	(M4910)ST ERK1 ERK2 MAPK PATHWAY; (M12012)ST P38 MAPK PATHWAY	(M5923)HALLMARK PI3K AKT MTOR SIGNALING; (M5939)HALLMARK P53 PATHWAY	1.0	0.0	0.0	0.0	0.0	0.0	0.0	0.0	0.0	0.0	0.0	1.0	0.0	0.0	0.0	0.0	0.0	0.0	0.0	0.0
MMAB	326625	symbol	H. sapiens	326625	H. sapiens	MMAB	metabolism of cobalamin associated B	GO:0009235 cobalamin metabolic process;GO:0033013 tetrapyrrole metabolic process;GO:0006767 water-soluble vitamin metabolic process		ENZYME proteins:Transferases; Predicted intracellular proteins; Enzymes; Disease related genes; Potential drug targets	Mitochondria (Approved)				0.0	0.0	0.0	0.0	0.0	0.0	0.0	0.0	0.0	0.0	0.0	0.0	0.0	0.0	0.0	0.0	0.0	0.0	0.0	0.0
MMP15	4324	symbol	H. sapiens	4324	H. sapiens	MMP15	matrix metallopeptidase 15	GO:0030574 collagen catabolic process;GO:0035987 endodermal cell differentiation;GO:0001706 endoderm formation		Cancer-related genes:Candidate cancer biomarkers; Predicted intracellular proteins; FDA approved drug targets:Small molecule drugs; Enzymes; Peptidases:Metallopeptidases	Cytosol;Plasma membrane (Approved); Additional: Nucleoplasm	Marimastat	(M3468)NABA ECM REGULATORS; (M5885)NABA MATRISOME ASSOCIATED; (M5889)NABA MATRISOME	(M5946)HALLMARK COAGULATION; (M5921)HALLMARK COMPLEMENT	0.0	0.0	0.0	0.0	0.0	0.0	0.0	0.0	0.0	0.0	0.0	0.0	0.0	0.0	0.0	0.0	0.0	0.0	0.0	0.0
MMP17	4326	symbol	H. sapiens	4326	H. sapiens	MMP17	matrix metallopeptidase 17	GO:0030574 collagen catabolic process;GO:0032963 collagen metabolic process;GO:0030198 extracellular matrix organization		Predicted intracellular proteins; Predicted secreted proteins; FDA approved drug targets:Small molecule drugs; Enzymes; Peptidases:Metallopeptidases		Marimastat	(M3468)NABA ECM REGULATORS; (M5885)NABA MATRISOME ASSOCIATED; (M5889)NABA MATRISOME		0.0	0.0	0.0	0.0	0.0	0.0	0.0	0.0	0.0	0.0	0.0	0.0	0.0	0.0	0.0	0.0	0.0	0.0	0.0	0.0
MOB2	81532	symbol	H. sapiens	81532	H. sapiens	MOB2	MOB kinase activator 2			Predicted intracellular proteins	Nucleoli (Supported); Additional: Cytosol;Nucleoplasm				0.0	0.0	0.0	0.0	0.0	0.0	0.0	0.0	0.0	0.0	0.0	0.0	0.0	0.0	0.0	0.0	0.0	0.0	0.0	0.0
MOB4	25843	symbol	H. sapiens	25843	H. sapiens	MOB4	MOB family member 4, phocein			Predicted intracellular proteins					0.0	0.0	0.0	0.0	0.0	0.0	0.0	0.0	0.0	0.0	0.0	0.0	0.0	0.0	0.0	0.0	0.0	0.0	0.0	0.0
MOCS3	27304	symbol	H. sapiens	27304	H. sapiens	MOCS3	molybdenum cofactor synthesis 3	GO:0002143 tRNA wobble position uridine thiolation;GO:0032447 protein urmylation;GO:0034227 tRNA thio-modification		ENZYME proteins:Transferases; Predicted intracellular proteins; Enzymes					0.0	0.0	0.0	0.0	0.0	0.0	0.0	0.0	0.0	1.0	0.0	0.0	0.0	0.0	0.0	0.0	0.0	0.0	0.0	0.0
MOGS	7841	symbol	H. sapiens	7841	H. sapiens	MOGS	mannosyl-oligosaccharide glucosidase	GO:0019082 viral protein processing;GO:0009311 oligosaccharide metabolic process;GO:0006487 protein N-linked glycosylation		Predicted intracellular proteins; ENZYME proteins:Hydrolases; Enzymes; Disease related genes; Potential drug targets	Endoplasmic reticulum (Supported)				0.0	0.0	0.0	0.0	0.0	0.0	0.0	0.0	0.0	0.0	0.0	0.0	0.0	0.0	0.0	0.0	0.0	0.0	0.0	0.0
MPG	4350	symbol	H. sapiens	4350	H. sapiens	MPG	N-methylpurine DNA glycosylase	GO:0045007 depurination;GO:0006307 DNA dealkylation involved in DNA repair;GO:0006285 base-excision repair, AP site formation		Predicted intracellular proteins; ENZYME proteins:Hydrolases; Enzymes	Nucleoplasm (Supported); Additional: Cytosol	Cisplatin; Zinc; Zinc acetate; Zinc chloride; Zinc sulfate, unspecified form	(M200)PID ERA GENOMIC PATHWAY	(M5898)HALLMARK DNA REPAIR	0.0	1.0	0.0	0.0	0.0	0.0	0.0	0.0	0.0	0.0	0.0	0.0	0.0	0.0	0.0	0.0	0.0	0.0	0.0	0.0
MPRIP	23164	symbol	H. sapiens	23164	H. sapiens	MPRIP	myosin phosphatase Rho interacting protein	GO:0007015 actin filament organization;GO:0030036 actin cytoskeleton organization;GO:0097435 supramolecular fiber organization		Predicted intracellular proteins	Actin filaments (Supported); Additional: Cytosol				0.0	0.0	0.0	0.0	0.0	0.0	0.0	0.0	0.0	0.0	0.0	0.0	0.0	0.0	0.0	0.0	0.0	1.0	0.0	0.0
MPST	4357	symbol	H. sapiens	4357	H. sapiens	MPST	mercaptopyruvate sulfurtransferase	GO:0009439 cyanate metabolic process;GO:0009440 cyanate catabolic process;GO:0009092 homoserine metabolic process		ENZYME proteins:Transferases; Predicted intracellular proteins; Enzymes; Disease related genes; Potential drug targets	Mitochondria (Approved); Additional: Cytosol				1.0	0.0	0.0	0.0	0.0	0.0	0.0	0.0	0.0	0.0	0.0	0.0	0.0	0.0	0.0	0.0	0.0	0.0	0.0	0.0
MRPL14	64928	symbol	H. sapiens	64928	H. sapiens	MRPL14	mitochondrial ribosomal protein L14	GO:0006412 translation;GO:0043043 peptide biosynthetic process;GO:0043604 amide biosynthetic process		Predicted intracellular proteins; Ribosomal proteins	Mitochondria (Supported)				1.0	0.0	0.0	0.0	0.0	0.0	0.0	0.0	0.0	0.0	0.0	0.0	0.0	0.0	0.0	0.0	0.0	0.0	0.0	0.0
MRPL20	55052	symbol	H. sapiens	55052	H. sapiens	MRPL20	mitochondrial ribosomal protein L20	GO:0000027 ribosomal large subunit assembly;GO:0042255 ribosome assembly;GO:0042273 ribosomal large subunit biogenesis		Predicted intracellular proteins; Ribosomal proteins	Mitochondria (Supported)				1.0	0.0	0.0	0.0	0.0	0.0	0.0	0.0	0.0	1.0	0.0	0.0	0.0	0.0	0.0	0.0	0.0	0.0	0.0	0.0
MRPL23	6150	symbol	H. sapiens	6150	H. sapiens	MRPL23	mitochondrial ribosomal protein L23	GO:0032543 mitochondrial translation;GO:0140053 mitochondrial gene expression;GO:0006412 translation		Predicted intracellular proteins; Ribosomal proteins	Mitochondria (Supported); Additional: Nucleoli fibrillar center			(M5941)HALLMARK UV RESPONSE UP; (M5926)HALLMARK MYC TARGETS V1	1.0	0.0	0.0	0.0	0.0	0.0	0.0	0.0	0.0	0.0	0.0	0.0	0.0	0.0	0.0	0.0	0.0	0.0	0.0	0.0
MRPL36	64979	symbol	H. sapiens	64979	H. sapiens	MRPL36	mitochondrial ribosomal protein L36	GO:0042254 ribosome biogenesis;GO:0022613 ribonucleoprotein complex biogenesis;GO:0006412 translation		Predicted intracellular proteins; Ribosomal proteins	Mitochondria;Nuclear bodies (Supported)				1.0	0.0	0.0	0.0	0.0	0.0	0.0	0.0	0.0	1.0	0.0	0.0	0.0	0.0	0.0	0.0	0.0	0.0	0.0	0.0
MRPL41	64975	symbol	H. sapiens	64975	H. sapiens	MRPL41	mitochondrial ribosomal protein L41	GO:0006412 translation;GO:0043043 peptide biosynthetic process;GO:0043604 amide biosynthetic process		Predicted intracellular proteins; Ribosomal proteins	Mitochondria (Supported)				1.0	0.0	0.0	0.0	0.0	0.0	0.0	0.0	0.0	0.0	0.0	0.0	0.0	0.0	0.0	0.0	0.0	0.0	0.0	0.0
MRPL43	84545	symbol	H. sapiens	84545	H. sapiens	MRPL43	mitochondrial ribosomal protein L43	GO:0032543 mitochondrial translation;GO:0140053 mitochondrial gene expression;GO:0006412 translation		Predicted intracellular proteins; Ribosomal proteins	Mitochondria;Nucleoplasm (Approved)				1.0	0.0	0.0	0.0	0.0	0.0	0.0	0.0	0.0	0.0	0.0	0.0	0.0	0.0	0.0	0.0	0.0	0.0	0.0	0.0
MRPL45P2	653479	symbol	H. sapiens	653479	H. sapiens	MRPL45P2	mitochondrial ribosomal protein L45 pseudogene 2								0.0	0.0	0.0	0.0	0.0	0.0	0.0	0.0	0.0	0.0	0.0	0.0	0.0	0.0	0.0	0.0	0.0	0.0	0.0	0.0
MRPL54	116541	symbol	H. sapiens	116541	H. sapiens	MRPL54	mitochondrial ribosomal protein L54			Predicted intracellular proteins	Mitochondria (Approved)				1.0	0.0	0.0	0.0	0.0	0.0	0.0	0.0	0.0	0.0	0.0	0.0	0.0	0.0	0.0	0.0	0.0	0.0	0.0	0.0
MRPL57	78988	symbol	H. sapiens	78988	H. sapiens	MRPL57	mitochondrial ribosomal protein L57	GO:0032543 mitochondrial translation;GO:0140053 mitochondrial gene expression;GO:0006412 translation		Predicted intracellular proteins; Ribosomal proteins	Mitochondria (Supported)				1.0	0.0	0.0	0.0	0.0	0.0	0.0	0.0	0.0	0.0	0.0	0.0	0.0	0.0	0.0	0.0	0.0	0.0	0.0	0.0
MRPS18A	55168	symbol	H. sapiens	55168	H. sapiens	MRPS18A	mitochondrial ribosomal protein S18A	GO:0032543 mitochondrial translation;GO:0140053 mitochondrial gene expression;GO:0006412 translation		Predicted intracellular proteins; Ribosomal proteins					1.0	0.0	0.0	0.0	0.0	0.0	0.0	0.0	0.0	0.0	0.0	0.0	0.0	0.0	0.0	0.0	0.0	0.0	0.0	0.0
MRPS18C	51023	symbol	H. sapiens	51023	H. sapiens	MRPS18C	mitochondrial ribosomal protein S18C	GO:0006412 translation;GO:0043043 peptide biosynthetic process;GO:0043604 amide biosynthetic process		Predicted intracellular proteins; Ribosomal proteins					1.0	0.0	0.0	0.0	0.0	0.0	0.0	0.0	0.0	0.0	0.0	0.0	0.0	0.0	0.0	0.0	0.0	0.0	0.0	0.0
MRPS24	64951	symbol	H. sapiens	64951	H. sapiens	MRPS24	mitochondrial ribosomal protein S24	GO:0032543 mitochondrial translation;GO:0140053 mitochondrial gene expression;GO:0006412 translation		Predicted intracellular proteins; Ribosomal proteins					1.0	0.0	0.0	0.0	0.0	0.0	0.0	0.0	0.0	0.0	0.0	0.0	0.0	0.0	0.0	0.0	0.0	0.0	0.0	0.0
MRPS26	64949	symbol	H. sapiens	64949	H. sapiens	MRPS26	mitochondrial ribosomal protein S26	GO:0042769 DNA damage response, detection of DNA damage;GO:0051606 detection of stimulus;GO:0006974 cellular response to DNA damage stimulus		Predicted intracellular proteins; Ribosomal proteins	Mitochondria (Supported); Additional: Nucleoplasm				1.0	0.0	0.0	0.0	0.0	0.0	0.0	0.0	0.0	0.0	0.0	0.0	0.0	0.0	0.0	0.0	0.0	0.0	0.0	0.0
MRPS30	10884	symbol	H. sapiens	10884	H. sapiens	MRPS30	mitochondrial ribosomal protein S30	GO:0006412 translation;GO:0043043 peptide biosynthetic process;GO:0043604 amide biosynthetic process		Predicted intracellular proteins; Ribosomal proteins				(M5936)HALLMARK OXIDATIVE PHOSPHORYLATION	1.0	0.0	0.0	0.0	0.0	0.0	0.0	0.0	0.0	0.0	0.0	0.0	0.0	0.0	0.0	0.0	0.0	0.0	0.0	0.0
MRS2P2	729633	symbol	H. sapiens	729633	H. sapiens	MRS2P2	MRS2 pseudogene 2								0.0	0.0	0.0	0.0	0.0	0.0	0.0	0.0	0.0	0.0	0.0	0.0	0.0	0.0	0.0	0.0	0.0	0.0	0.0	0.0
MSC	9242	symbol	H. sapiens	9242	H. sapiens	MSC	musculin	GO:0014707 branchiomeric skeletal muscle development;GO:0060539 diaphragm development;GO:0003161 cardiac conduction system development		Predicted intracellular proteins; Transcription factors:Basic domains	Nucleoplasm (Supported)			(M5890)HALLMARK TNFA SIGNALING VIA NFKB	0.0	0.0	0.0	0.0	0.0	0.0	0.0	0.0	0.0	0.0	1.0	0.0	0.0	0.0	0.0	0.0	0.0	0.0	0.0	0.0
MST1P2	11209	symbol	H. sapiens	11209	H. sapiens	MST1P2	macrophage stimulating 1 pseudogene 2								0.0	0.0	0.0	0.0	0.0	0.0	0.0	0.0	0.0	0.0	0.0	0.0	0.0	0.0	0.0	0.0	0.0	0.0	0.0	0.0
MSTO1	55154	symbol	H. sapiens	55154	H. sapiens	MSTO1	misato mitochondrial distribution and morphology regulator 1	GO:0048311 mitochondrion distribution;GO:0051646 mitochondrion localization;GO:0007005 mitochondrion organization		Predicted intracellular proteins; Disease related genes	Cytosol (Supported)				0.0	0.0	0.0	1.0	0.0	0.0	0.0	0.0	0.0	0.0	0.0	0.0	0.0	0.0	0.0	0.0	0.0	0.0	0.0	0.0
MTA1	9112	symbol	H. sapiens	9112	H. sapiens	MTA1	metastasis associated 1	GO:1902499 positive regulation of protein autoubiquitination;GO:1902498 regulation of protein autoubiquitination;GO:0045475 locomotor rhythm		Cancer-related genes:Candidate cancer biomarkers; Transcription factors:Zinc-coordinating DNA-binding domains; Predicted intracellular proteins; Transcription factors:Helix-turn-helix domains	Nucleoplasm (Enhanced); Additional: Cytosol		(M200)PID ERA GENOMIC PATHWAY; (M66)PID MYC ACTIV PATHWAY	(M5942)HALLMARK UV RESPONSE DN	0.0	1.0	1.0	0.0	0.0	0.0	0.0	1.0	0.0	0.0	0.0	0.0	0.0	1.0	0.0	0.0	0.0	1.0	0.0	0.0
MTHFD2L	441024	symbol	H. sapiens	441024	H. sapiens	MTHFD2L	methylenetetrahydrofolate dehydrogenase (NADP+ dependent) 2 like	GO:0000105 histidine biosynthetic process;GO:0009256 10-formyltetrahydrofolate metabolic process;GO:0006547 histidine metabolic process		Predicted intracellular proteins; Enzymes; ENZYME proteins:Hydrolases; ENZYME proteins:Oxidoreductases				(M5924)HALLMARK MTORC1 SIGNALING	0.0	0.0	0.0	0.0	0.0	0.0	0.0	0.0	0.0	0.0	0.0	0.0	0.0	0.0	0.0	0.0	0.0	0.0	0.0	0.0
MTHFS	10588	symbol	H. sapiens	10588	H. sapiens	MTHFS	methenyltetrahydrofolate synthetase	GO:0046657 folic acid catabolic process;GO:0042365 water-soluble vitamin catabolic process;GO:0009397 folic acid-containing compound catabolic process		Predicted intracellular proteins; Enzymes; ENZYME proteins:Ligase	Cytosol (Supported)				0.0	0.0	0.0	0.0	0.0	0.0	0.0	0.0	0.0	0.0	0.0	0.0	0.0	0.0	0.0	0.0	0.0	0.0	0.0	0.0
MTSS1	9788	symbol	H. sapiens	9788	H. sapiens	MTSS1	MTSS I-BAR domain containing 1	GO:0030035 microspike assembly;GO:2001013 epithelial cell proliferation involved in renal tubule morphogenesis;GO:0072102 glomerulus morphogenesis		Predicted intracellular proteins	Cytosol;Plasma membrane (Approved)		(M219)PID HEDGEHOG GLI PATHWAY		0.0	0.0	0.0	0.0	0.0	0.0	0.0	0.0	0.0	0.0	0.0	0.0	0.0	0.0	0.0	0.0	0.0	0.0	0.0	0.0
MTX1	4580	symbol	H. sapiens	4580	H. sapiens	MTX1	metaxin 1	GO:0007007 inner mitochondrial membrane organization;GO:0007595 lactation;GO:0007589 body fluid secretion			Mitochondria (Approved)				0.0	1.0	0.0	1.0	0.0	0.0	0.0	0.0	0.0	0.0	0.0	0.0	0.0	0.0	0.0	0.0	0.0	0.0	0.0	0.0
MUC6	4588	symbol	H. sapiens	4588	H. sapiens	MUC6	mucin 6, oligomeric mucus/gel-forming	GO:0030277 maintenance of gastrointestinal epithelium;GO:0010669 epithelial structure maintenance;GO:0022600 digestive system process		Predicted intracellular proteins; Predicted secreted proteins			(M5880)NABA ECM AFFILIATED; (M5885)NABA MATRISOME ASSOCIATED; (M5889)NABA MATRISOME		0.0	0.0	0.0	0.0	0.0	0.0	0.0	0.0	0.0	0.0	0.0	0.0	0.0	0.0	0.0	0.0	0.0	1.0	0.0	0.0
MVB12A	93343	symbol	H. sapiens	93343	H. sapiens	MVB12A	multivesicular body subunit 12A	GO:0019075 virus maturation;GO:0032510 endosome to lysosome transport via multivesicular body sorting pathway;GO:0039702 viral budding via host ESCRT complex		Predicted intracellular proteins	Nucleoplasm (Supported); Additional: Golgi apparatus			(M5911)HALLMARK INTERFERON ALPHA RESPONSE	0.0	1.0	0.0	0.0	0.0	0.0	0.0	0.0	0.0	0.0	0.0	0.0	0.0	1.0	0.0	0.0	0.0	1.0	0.0	0.0
MVD	4597	symbol	H. sapiens	4597	H. sapiens	MVD	mevalonate diphosphate decarboxylase	GO:0019287 isopentenyl diphosphate biosynthetic process, mevalonate pathway;GO:0009240 isopentenyl diphosphate biosynthetic process;GO:0046490 isopentenyl diphosphate metabolic process		ENZYME proteins:Lyases; Predicted intracellular proteins; Enzymes; Disease related genes; Potential drug targets	Cytosol (Approved); Additional: Cell Junctions			(M5892)HALLMARK CHOLESTEROL HOMEOSTASIS; (M5915)HALLMARK APICAL JUNCTION	0.0	0.0	0.0	0.0	0.0	0.0	0.0	0.0	0.0	0.0	0.0	0.0	0.0	0.0	0.0	0.0	0.0	0.0	0.0	0.0
MXD4	10608	symbol	H. sapiens	10608	H. sapiens	MXD4	MAX dimerization protein 4	GO:0000122 negative regulation of transcription by RNA polymerase II;GO:0045892 negative regulation of transcription, DNA-templated;GO:1903507 negative regulation of nucleic acid-templated transcription		Predicted intracellular proteins; Transcription factors:Basic domains	Cytosol (Supported)		(M254)PID MYC REPRESS PATHWAY	(M5939)HALLMARK P53 PATHWAY	0.0	0.0	0.0	0.0	0.0	0.0	0.0	0.0	0.0	0.0	0.0	0.0	0.0	0.0	0.0	0.0	0.0	0.0	0.0	0.0
MXRA8	54587	symbol	H. sapiens	54587	H. sapiens	MXRA8	matrix remodeling associated 8	GO:0060857 establishment of glial blood-brain barrier;GO:0060856 establishment of blood-brain barrier;GO:0021782 glial cell development			Nucleoli (Approved)				0.0	0.0	0.0	0.0	0.0	0.0	0.0	0.0	0.0	0.0	0.0	0.0	0.0	0.0	0.0	0.0	0.0	0.0	0.0	0.0
MYBBP1A	10514	symbol	H. sapiens	10514	H. sapiens	MYBBP1A	MYB binding protein 1a	GO:2000210 positive regulation of anoikis;GO:2000209 regulation of anoikis;GO:0043276 anoikis		Predicted intracellular proteins	Nucleoli (Supported); Additional: Vesicles			(M5928)HALLMARK MYC TARGETS V2; (M5906)HALLMARK ESTROGEN RESPONSE EARLY	1.0	1.0	0.0	0.0	1.0	0.0	0.0	0.0	0.0	1.0	0.0	1.0	0.0	0.0	0.0	0.0	0.0	0.0	0.0	0.0
MYCBP	26292	symbol	H. sapiens	26292	H. sapiens	MYCBP	MYC binding protein	GO:0007283 spermatogenesis;GO:0048232 male gamete generation;GO:0007276 gamete generation		Predicted intracellular proteins	Nucleoplasm (Approved); Additional: Mitochondria		(M17)PID NOTCH PATHWAY		0.0	0.0	0.0	0.0	0.0	0.0	0.0	0.0	0.0	0.0	0.0	0.0	0.0	0.0	0.0	0.0	0.0	0.0	0.0	0.0
MYCT1	80177	symbol	H. sapiens	80177	H. sapiens	MYCT1	MYC target 1	GO:0061484 hematopoietic stem cell homeostasis;GO:0048872 homeostasis of number of cells;GO:0042592 homeostatic process		Predicted intracellular proteins	Nucleoplasm (Approved); Additional: Vesicles		(M66)PID MYC ACTIV PATHWAY		0.0	0.0	0.0	0.0	0.0	0.0	0.0	0.0	0.0	0.0	0.0	0.0	0.0	0.0	0.0	0.0	0.0	0.0	0.0	0.0
MYDGF	56005	symbol	H. sapiens	56005	H. sapiens	MYDGF	myeloid derived growth factor	GO:0014068 positive regulation of phosphatidylinositol 3-kinase signaling;GO:0014066 regulation of phosphatidylinositol 3-kinase signaling;GO:0001938 positive regulation of endothelial cell proliferation		Predicted intracellular proteins; Predicted secreted proteins					1.0	0.0	0.0	0.0	0.0	0.0	0.0	0.0	0.0	0.0	0.0	0.0	0.0	0.0	0.0	0.0	0.0	0.0	1.0	0.0
MYEOV2	150678	gene_synonym	H. sapiens	150678	H. sapiens	COPS9	COP9 signalosome subunit 9	GO:2000435 negative regulation of protein neddylation;GO:2000434 regulation of protein neddylation;GO:0045116 protein neddylation		Predicted intracellular proteins	Cytosol;Nucleoplasm (Approved)				0.0	0.0	0.0	0.0	0.0	0.0	0.0	0.0	0.0	0.0	0.0	0.0	0.0	0.0	0.0	0.0	0.0	0.0	0.0	0.0
MYH9	4627	symbol	H. sapiens	4627	H. sapiens	MYH9	myosin heavy chain 9	GO:1903918 regulation of actin filament severing;GO:1903919 negative regulation of actin filament severing;GO:1900756 protein processing in phagocytic vesicle		Cancer-related genes:Mutational cancer driver genes; Disease related genes; Predicted intracellular proteins	Actin filaments;Plasma membrane (Supported); Additional: Cytosol	Artenimol		(M5919)HALLMARK HEDGEHOG SIGNALING; (M5893)HALLMARK MITOTIC SPINDLE; (M5891)HALLMARK HYPOXIA	1.0	1.0	0.0	0.0	0.0	0.0	1.0	0.0	0.0	0.0	1.0	0.0	1.0	0.0	0.0	0.0	0.0	1.0	0.0	1.0
MYL5	4636	symbol	H. sapiens	4636	H. sapiens	MYL5	myosin light chain 5	GO:0006937 regulation of muscle contraction;GO:0090257 regulation of muscle system process;GO:0006936 muscle contraction		Predicted intracellular proteins	Nucleoli;Nucleoplasm (Uncertain)				0.0	0.0	0.0	0.0	0.0	0.0	0.0	0.0	0.0	0.0	0.0	0.0	0.0	0.0	0.0	0.0	0.0	0.0	0.0	0.0
MYO18B	84700	symbol	H. sapiens	84700	H. sapiens	MYO18B	myosin XVIIIB	GO:0001570 vasculogenesis;GO:0055013 cardiac muscle cell development;GO:0055006 cardiac cell development		Predicted intracellular proteins	Centrosome;Nucleoplasm (Supported)				0.0	0.0	0.0	0.0	0.0	0.0	0.0	0.0	0.0	0.0	1.0	0.0	0.0	0.0	0.0	0.0	0.0	0.0	0.0	0.0
MYOZ2	51778	symbol	H. sapiens	51778	H. sapiens	MYOZ2	myozenin 2	GO:0043503 skeletal muscle fiber adaptation;GO:0070885 negative regulation of calcineurin-NFAT signaling cascade;GO:0106057 negative regulation of calcineurin-mediated signaling		Predicted intracellular proteins; Disease related genes	Cytosol;Nucleoplasm (Approved)				0.0	0.0	0.0	0.0	0.0	0.0	0.0	0.0	0.0	0.0	1.0	1.0	0.0	0.0	0.0	0.0	0.0	0.0	0.0	0.0
MYPOP	339344	symbol	H. sapiens	339344	H. sapiens	MYPOP	Myb related transcription factor, partner of profilin	GO:0000122 negative regulation of transcription by RNA polymerase II;GO:0045892 negative regulation of transcription, DNA-templated;GO:1903507 negative regulation of nucleic acid-templated transcription		Predicted intracellular proteins	Nucleoplasm (Approved)				0.0	0.0	0.0	0.0	0.0	0.0	0.0	0.0	0.0	0.0	0.0	0.0	0.0	0.0	0.0	0.0	0.0	0.0	0.0	0.0
[truncated: 892 more rows]

## Sheet: Enrichment
GroupID	Category	Term	Description	LogP	Log(q-value)	InTerm_InList	Genes	Symbols
[truncated: 441 more rows]
