# Supplementary material for: Transcriptional profiling of Hutchinson-Gilford Progeria syndrome fibroblasts reveals deficits in mesenchymal stem cell commitment to differentiation related to early events in endochondral ossification
Source: eLife journal article supplement (doi:10.7554/elife.81290), 2022-12-29
Supplement: table1-data1 [file metascape_result.xlsx]

## Sheet: Annotation
MyList	Gene ID	Type	Tax ID	Homologene Gene ID	Homologene Gene Tax ID	Gene Symbol	Description	Biological Process (GO)	Kinase Class (UniProt)	Protein Function (Protein Atlas)	Subcellular Location (Protein Atlas)	Drug (DrugBank)	Canonical Pathways	Hallmark Gene Sets	R-HSA-1474244 Extracellular matrix organizat	R-HSA-6785807 Interleukin-4 and Interleukin-	GO:0007178 transmembrane receptor protein	GO:0018108 peptidyl-tyrosine phosphorylat	GO:0120031 plasma membrane bounded cell p	GO:0007389 pattern specification process	GO:0002638 negative regulation of immunog	GO:0051272 positive regulation of cellula	GO:1901615 organic hydroxy compound metab	M5885 NABA MATRISOME ASSOCIATED	GO:0010675 regulation of cellular carbohy	GO:0042987 amyloid precursor protein cata	GO:0010934 macrophage cytokine production	GO:0090136 epithelial cell-cell adhesion	GO:0007204 positive regulation of cytosol	GO:0061383 trabecula morphogenesis	GO:0001704 formation of primary germ laye	hsa05410 Hypertrophic cardiomyopathy (H	hsa00340 Histidine metabolism	GO:1901655 cellular response to ketone
C10orf11	83938	gene_synonym	H. sapiens	83938	H. sapiens	LRMDA	leucine rich melanocyte differentiation associated	GO:0030318 melanocyte differentiation;GO:0050931 pigment cell differentiation;GO:0048066 developmental pigmentation		Predicted intracellular proteins; Disease related genes	Nucleoplasm (Supported); Additional: Cytosol				0.0	0.0	0.0	0.0	0.0	0.0	0.0	0.0	0.0	0.0	0.0	0.0	0.0	0.0	0.0	0.0	0.0	0.0	0.0	0.0
SFRP2	6423	symbol	H. sapiens	6423	H. sapiens	SFRP2	secreted frizzled related protein 2	GO:0061185 negative regulation of dermatome development;GO:2000040 regulation of planar cell polarity pathway involved in axis elongation;GO:2000041 negative regulation of planar cell polarity pathway involved in axis elongation		Predicted secreted proteins	Intermediate filaments (Approved)		(M5883)NABA SECRETED FACTORS; (M5885)NABA MATRISOME ASSOCIATED; (M5889)NABA MATRISOME		1.0	0.0	1.0	1.0	0.0	1.0	0.0	0.0	0.0	1.0	1.0	0.0	0.0	0.0	0.0	0.0	1.0	0.0	0.0	0.0
IQCK	124152	symbol	H. sapiens	124152	H. sapiens	IQCK	IQ motif containing K			Predicted intracellular proteins	Nuclear speckles (Approved); Additional: Cytosol				0.0	0.0	0.0	0.0	0.0	0.0	0.0	0.0	0.0	0.0	0.0	0.0	0.0	0.0	0.0	0.0	0.0	0.0	0.0	0.0
IL21-AS1	100996941	symbol	H. sapiens	100996941	H. sapiens	IL21-AS1	IL21 antisense RNA 1								0.0	0.0	0.0	0.0	0.0	0.0	0.0	0.0	0.0	0.0	0.0	0.0	0.0	0.0	0.0	0.0	0.0	0.0	0.0	0.0
ABCB4	5244	symbol	H. sapiens	5244	H. sapiens	ABCB4	ATP binding cassette subfamily B member 4	GO:1901557 response to fenofibrate;GO:0099040 ceramide translocation;GO:0099039 sphingolipid translocation		Predicted intracellular proteins; Transporters:Primary Active Transporters; ENZYME proteins:Hydrolases; Enzymes; Disease related genes; Potential drug targets	Actin filaments;Nucleoplasm;Plasma membrane (Approved); Additional: Focal adhesion sites			(M5949)HALLMARK PEROXISOME	0.0	0.0	0.0	0.0	0.0	0.0	0.0	0.0	0.0	0.0	0.0	0.0	0.0	0.0	0.0	0.0	0.0	0.0	0.0	1.0
RPGRIP1L	23322	symbol	H. sapiens	23322	H. sapiens	RPGRIP1L	RPGRIP1 like	GO:0046548 retinal rod cell development;GO:0021670 lateral ventricle development;GO:0060221 retinal rod cell differentiation		Predicted intracellular proteins; Disease related genes	Cytosol;Plasma membrane (Supported)				0.0	0.0	0.0	0.0	1.0	1.0	0.0	0.0	0.0	0.0	0.0	0.0	0.0	0.0	0.0	0.0	0.0	0.0	0.0	0.0
GPRC5B	51704	symbol	H. sapiens	51704	H. sapiens	GPRC5B	G protein-coupled receptor class C group 5 member B	GO:0060907 positive regulation of macrophage cytokine production;GO:0010934 macrophage cytokine production;GO:0010935 regulation of macrophage cytokine production		Predicted intracellular proteins; G-protein coupled receptors:Family 3 (C) receptors; G-protein coupled receptors:GPCRs excl olfactory receptors	Vesicles (Supported); Additional: Nucleoli;Nucleoplasm			(M5953)HALLMARK KRAS SIGNALING UP	0.0	0.0	0.0	1.0	0.0	0.0	1.0	1.0	0.0	0.0	0.0	0.0	1.0	0.0	0.0	0.0	0.0	0.0	0.0	0.0
SGCG	6445	symbol	H. sapiens	6445	H. sapiens	SGCG	sarcoglycan gamma	GO:0048738 cardiac muscle tissue development;GO:0060047 heart contraction;GO:0003015 heart process		Disease related genes				(M5909)HALLMARK MYOGENESIS; (M5930)HALLMARK EPITHELIAL MESENCHYMAL TRANSITION	0.0	0.0	0.0	0.0	0.0	0.0	0.0	0.0	0.0	0.0	0.0	0.0	0.0	0.0	0.0	0.0	0.0	1.0	0.0	0.0
CASP10	843	symbol	H. sapiens	843	H. sapiens	CASP10	caspase 10	GO:0006919 activation of cysteine-type endopeptidase activity involved in apoptotic process;GO:0097194 execution phase of apoptosis;GO:0043280 positive regulation of cysteine-type endopeptidase activity involved in apoptotic process		Cancer-related genes:Candidate cancer biomarkers; Peptidases:Cysteine-type peptidases; Predicted intracellular proteins; ENZYME proteins:Hydrolases; Enzymes; Disease related genes; Potential drug targets	Golgi apparatus (Approved); Additional: Vesicles		(M7997)SA CASPASE CASCADE; (M79)PID TRAIL PATHWAY; (M94)PID FAS PATHWAY	(M5921)HALLMARK COMPLEMENT	0.0	0.0	0.0	0.0	0.0	0.0	0.0	0.0	0.0	0.0	0.0	0.0	0.0	0.0	0.0	0.0	0.0	0.0	0.0	0.0
SH3KBP1	30011	symbol	H. sapiens	30011	H. sapiens	SH3KBP1	SH3 domain containing kinase binding protein 1	GO:0050871 positive regulation of B cell activation;GO:0008360 regulation of cell shape;GO:0050864 regulation of B cell activation		Predicted intracellular proteins	Cytosol (Supported)		(M214)PID ERBB1 INTERNALIZATION PATHWAY; (M48)PID MET PATHWAY		1.0	0.0	0.0	0.0	0.0	0.0	1.0	0.0	0.0	0.0	0.0	0.0	0.0	0.0	0.0	0.0	0.0	0.0	0.0	0.0
C2	717	symbol	H. sapiens	717	H. sapiens	C2	complement C2	GO:2000427 positive regulation of apoptotic cell clearance;GO:2000425 regulation of apoptotic cell clearance;GO:0043277 apoptotic cell clearance		Predicted intracellular proteins; Predicted secreted proteins; Peptidases:Serine-type peptidases; ENZYME proteins:Hydrolases; Enzymes; Disease related genes; Potential drug targets				(M5946)HALLMARK COAGULATION; (M5921)HALLMARK COMPLEMENT; (M5950)HALLMARK ALLOGRAFT REJECTION	0.0	0.0	0.0	0.0	0.0	0.0	1.0	0.0	0.0	0.0	0.0	0.0	0.0	0.0	0.0	0.0	0.0	0.0	0.0	0.0
ALDH1A3	220	symbol	H. sapiens	220	H. sapiens	ALDH1A3	aldehyde dehydrogenase 1 family member A3	GO:0021768 nucleus accumbens development;GO:0060166 olfactory pit development;GO:0070384 Harderian gland development		Predicted intracellular proteins; Enzymes; ENZYME proteins:Oxidoreductases; Disease related genes; Potential drug targets	Nucleoplasm (Supported); Additional: Cytosol	NADH; Vitamin A		(M5908)HALLMARK ANDROGEN RESPONSE; (M5953)HALLMARK KRAS SIGNALING UP	0.0	0.0	0.0	0.0	0.0	1.0	0.0	0.0	1.0	0.0	0.0	0.0	0.0	0.0	0.0	0.0	0.0	0.0	1.0	0.0
WISP2	8839	gene_synonym	H. sapiens	8839	H. sapiens	CCN5	cellular communication network factor 5	GO:0060548 negative regulation of cell death;GO:0007155 cell adhesion;GO:0022610 biological adhesion		Predicted secreted proteins			(M3008)NABA ECM GLYCOPROTEINS; (M5884)NABA CORE MATRISOME; (M5889)NABA MATRISOME	(M5891)HALLMARK HYPOXIA; (M5906)HALLMARK ESTROGEN RESPONSE EARLY; (M5907)HALLMARK ESTROGEN RESPONSE LATE	1.0	0.0	0.0	0.0	0.0	0.0	0.0	0.0	0.0	0.0	0.0	0.0	0.0	0.0	0.0	0.0	0.0	0.0	0.0	0.0
CLK1	1195	symbol	H. sapiens	1195	H. sapiens	CLK1	CDC like kinase 1	GO:0018107 peptidyl-threonine phosphorylation;GO:0018210 peptidyl-threonine modification;GO:0043484 regulation of RNA splicing	CMGC Ser/Thr protein kinase family	ENZYME proteins:Transferases; Predicted intracellular proteins; Kinases:CMGC Ser/Thr protein kinases; Enzymes	Nuclear membrane;Nucleoplasm (Supported)	Debromohymenialdisine; CHGN111; ethyl 3-[(E)-2-amino-1-cyanoethenyl]-6,7-dichloro-1-methyl-1H-indole-2-carboxylate; Fostamatinib			0.0	0.0	0.0	1.0	0.0	0.0	0.0	0.0	0.0	0.0	0.0	0.0	0.0	0.0	0.0	0.0	0.0	0.0	0.0	0.0
BCL6B	255877	symbol	H. sapiens	255877	H. sapiens	BCL6B	BCL6B transcription repressor	GO:0042092 type 2 immune response;GO:0050727 regulation of inflammatory response;GO:0031347 regulation of defense response		Transcription factors:Zinc-coordinating DNA-binding domains; Predicted intracellular proteins	Vesicles (Approved)				0.0	0.0	0.0	0.0	0.0	0.0	0.0	0.0	0.0	0.0	0.0	0.0	0.0	0.0	0.0	0.0	0.0	0.0	0.0	0.0
TNFAIP2	7127	symbol	H. sapiens	7127	H. sapiens	TNFAIP2	TNF alpha induced protein 2	GO:0051601 exocyst localization;GO:0034629 cellular protein-containing complex localization;GO:0031503 protein-containing complex localization		Cancer-related genes:Candidate cancer biomarkers; Predicted intracellular proteins; Transporters:Transporter channels and pores	Cytosol;Golgi apparatus (Approved); Additional: Nuclear membrane;Nucleoplasm			(M5890)HALLMARK TNFA SIGNALING VIA NFKB; (M5913)HALLMARK INTERFERON GAMMA RESPONSE	0.0	0.0	0.0	0.0	0.0	0.0	0.0	0.0	0.0	0.0	0.0	0.0	0.0	0.0	0.0	0.0	0.0	0.0	0.0	0.0
USP43	124739	symbol	H. sapiens	124739	H. sapiens	USP43	ubiquitin specific peptidase 43	GO:0019985 translesion synthesis;GO:0006301 postreplication repair;GO:0000731 DNA synthesis involved in DNA repair		Predicted intracellular proteins; Peptidases:Cysteine-type peptidases; ENZYME proteins:Hydrolases; Enzymes					0.0	0.0	0.0	0.0	0.0	0.0	0.0	0.0	0.0	0.0	0.0	0.0	0.0	0.0	0.0	0.0	0.0	0.0	0.0	0.0
CCL26	10344	symbol	H. sapiens	10344	H. sapiens	CCL26	C-C motif chemokine ligand 26	GO:0048245 eosinophil chemotaxis;GO:0072677 eosinophil migration;GO:0010818 T cell chemotaxis		Predicted secreted proteins			(M28)PID IL4 2PATHWAY; (M5883)NABA SECRETED FACTORS; (M5885)NABA MATRISOME ASSOCIATED		1.0	0.0	0.0	0.0	0.0	0.0	0.0	1.0	0.0	1.0	1.0	0.0	0.0	0.0	0.0	0.0	0.0	0.0	0.0	0.0
SNAI1	6615	symbol	H. sapiens	6615	H. sapiens	SNAI1	snail family transcriptional repressor 1	GO:0060806 negative regulation of cell differentiation involved in embryonic placenta development;GO:0060800 regulation of cell differentiation involved in embryonic placenta development;GO:0010957 negative regulation of vitamin D biosynthetic process		Transcription factors:Zinc-coordinating DNA-binding domains; Predicted intracellular proteins	Nucleoplasm (Supported)		(M71)PID ILK PATHWAY; (M48)PID MET PATHWAY; (M66)PID MYC ACTIV PATHWAY		0.0	0.0	0.0	0.0	0.0	1.0	0.0	1.0	1.0	0.0	1.0	0.0	0.0	0.0	0.0	0.0	1.0	0.0	0.0	0.0
LINC00856	100132987	symbol	H. sapiens	100132987	H. sapiens	LINC00856	long intergenic non-protein coding RNA 856								0.0	0.0	0.0	0.0	0.0	0.0	0.0	0.0	0.0	0.0	0.0	0.0	0.0	0.0	0.0	0.0	0.0	0.0	0.0	0.0
TRIM9	114088	symbol	H. sapiens	114088	H. sapiens	TRIM9	tripartite motif containing 9	GO:0043161 proteasome-mediated ubiquitin-dependent protein catabolic process;GO:0010498 proteasomal protein catabolic process;GO:0006511 ubiquitin-dependent protein catabolic process		ENZYME proteins:Transferases; Predicted intracellular proteins; Enzymes					0.0	0.0	0.0	0.0	0.0	0.0	0.0	0.0	0.0	0.0	0.0	0.0	0.0	0.0	0.0	0.0	0.0	0.0	0.0	0.0
44449						None	None	None	None	None	None	None	None	None	nan	nan	nan	nan	nan	nan	nan	nan	nan	nan	nan	nan	nan	nan	nan	nan	nan	nan	nan	nan
GPX7	2882	symbol	H. sapiens	2882	H. sapiens	GPX7	glutathione peroxidase 7	GO:0098869 cellular oxidant detoxification;GO:1990748 cellular detoxification;GO:0097237 cellular response to toxic substance		Predicted secreted proteins; Enzymes; ENZYME proteins:Oxidoreductases; Disease related genes; Potential drug targets		Glutathione		(M5930)HALLMARK EPITHELIAL MESENCHYMAL TRANSITION	0.0	0.0	0.0	0.0	0.0	0.0	0.0	0.0	0.0	0.0	0.0	0.0	0.0	0.0	0.0	0.0	0.0	0.0	0.0	0.0
CASC2	255082	symbol	H. sapiens	255082	H. sapiens	CASC2	cancer susceptibility 2	GO:0002357 defense response to tumor cell;GO:0002347 response to tumor cell;GO:0043280 positive regulation of cysteine-type endopeptidase activity involved in apoptotic process							0.0	0.0	0.0	0.0	0.0	0.0	0.0	0.0	0.0	0.0	1.0	0.0	0.0	0.0	0.0	0.0	0.0	0.0	0.0	0.0
PDK4	5166	symbol	H. sapiens	5166	H. sapiens	PDK4	pyruvate dehydrogenase kinase 4	GO:0010510 regulation of acetyl-CoA biosynthetic process from pyruvate;GO:0050812 regulation of acyl-CoA biosynthetic process;GO:0006086 acetyl-CoA biosynthetic process from pyruvate	Atypical: PDK/BCKDK protein kinase family	ENZYME proteins:Transferases; Predicted intracellular proteins; Enzymes; Kinases:Atypical kinases		Tretinoin; 4-[4-(4-methoxyphenyl)-5-methyl-1H-pyrazol-3-yl]benzene-1,3-diol		(M5934)HALLMARK XENOBIOTIC METABOLISM; (M5936)HALLMARK OXIDATIVE PHOSPHORYLATION	0.0	0.0	0.0	0.0	0.0	0.0	0.0	0.0	1.0	0.0	1.0	0.0	0.0	0.0	1.0	0.0	0.0	0.0	0.0	1.0
ABI1	10006	symbol	H. sapiens	10006	H. sapiens	ABI1	abl interactor 1	GO:0072673 lamellipodium morphogenesis;GO:0035855 megakaryocyte development;GO:0098751 bone cell development		Predicted intracellular proteins; Disease related genes; Cancer-related genes	Plasma membrane (Approved)		(M277)PID INTEGRIN A4B1 PATHWAY; (M241)PID RAC1 REG PATHWAY; (M156)PID ECADHERIN NASCENT AJ PATHWAY	(M5893)HALLMARK MITOTIC SPINDLE; (M5932)HALLMARK INFLAMMATORY RESPONSE; (M5950)HALLMARK ALLOGRAFT REJECTION	1.0	0.0	0.0	1.0	0.0	1.0	0.0	0.0	0.0	0.0	1.0	0.0	0.0	0.0	0.0	0.0	0.0	0.0	0.0	0.0
IL22RA1	58985	symbol	H. sapiens	58985	H. sapiens	IL22RA1	interleukin 22 receptor subunit alpha 1	GO:0050829 defense response to Gram-negative bacterium;GO:0042742 defense response to bacterium;GO:0019221 cytokine-mediated signaling pathway							0.0	1.0	0.0	0.0	0.0	0.0	0.0	0.0	0.0	0.0	0.0	0.0	0.0	0.0	0.0	0.0	0.0	0.0	0.0	0.0
LOC653602	151354	Gene_ID	H. sapiens	151354	H. sapiens	LRATD1	LRAT domain containing 1	GO:0000902 cell morphogenesis;GO:0048870 cell motility;GO:0051674 localization of cell		Predicted intracellular proteins	Nucleoplasm (Approved)				0.0	0.0	0.0	0.0	0.0	0.0	0.0	0.0	0.0	0.0	0.0	0.0	0.0	0.0	0.0	0.0	0.0	0.0	0.0	0.0
EPOR	2057	symbol	H. sapiens	2057	H. sapiens	EPOR	erythropoietin receptor	GO:0038162 erythropoietin-mediated signaling pathway;GO:0036018 cellular response to erythropoietin;GO:0036017 response to erythropoietin		Cancer-related genes:Candidate cancer biomarkers; Disease related genes; FDA approved drug targets:Biotech drugs	Plasma membrane (Supported); Additional: Nuclear speckles	Darbepoetin alfa; Erythropoietin; Dibromotyrosine; Peginesatide; Methoxy polyethylene glycol-epoetin beta	(M233)PID EPO PATHWAY; (M231)PID KIT PATHWAY	(M5945)HALLMARK HEME METABOLISM	0.0	0.0	0.0	0.0	0.0	0.0	0.0	0.0	0.0	0.0	0.0	0.0	0.0	0.0	0.0	0.0	0.0	0.0	0.0	0.0
STRN	6801	symbol	H. sapiens	6801	H. sapiens	STRN	striatin	GO:0070830 bicellular tight junction assembly;GO:0120192 tight junction assembly;GO:0043297 apical junction assembly		Predicted intracellular proteins; Cancer-related genes	Cytosol (Approved); Additional: Nucleoplasm		(M41)PID ER NONGENOMIC PATHWAY	(M5953)HALLMARK KRAS SIGNALING UP	0.0	0.0	0.0	1.0	0.0	0.0	0.0	0.0	0.0	0.0	0.0	0.0	0.0	0.0	0.0	0.0	0.0	0.0	0.0	0.0
MIR497HG	100506755	symbol	H. sapiens	100506755	H. sapiens	MIR497HG	mir-497-195 cluster host gene								0.0	0.0	0.0	0.0	0.0	0.0	0.0	0.0	0.0	0.0	0.0	0.0	0.0	0.0	0.0	0.0	0.0	0.0	0.0	0.0
KCNS3	3790	symbol	H. sapiens	3790	H. sapiens	KCNS3	potassium voltage-gated channel modifier subfamily S member 3	GO:0051260 protein homooligomerization;GO:0071805 potassium ion transmembrane transport;GO:0051259 protein complex oligomerization		Transporters:Transporter channels and pores; Predicted intracellular proteins; Voltage-gated ion channels:Voltage-Gated Potassium Channels	Cytosol (Supported); Additional: Golgi apparatus;Plasma membrane				0.0	0.0	0.0	0.0	0.0	0.0	0.0	0.0	0.0	0.0	0.0	0.0	0.0	0.0	1.0	0.0	0.0	0.0	0.0	0.0
RASL11B	65997	symbol	H. sapiens	65997	H. sapiens	RASL11B	RAS like family 11 member B	GO:0030512 negative regulation of transforming growth factor beta receptor signaling pathway;GO:0017015 regulation of transforming growth factor beta receptor signaling pathway;GO:0090101 negative regulation of transmembrane receptor protein serine/threonine kinase signaling pathway		Predicted intracellular proteins	Nuclear bodies (Approved)				0.0	0.0	1.0	0.0	0.0	0.0	0.0	0.0	0.0	0.0	0.0	0.0	0.0	0.0	0.0	0.0	0.0	0.0	0.0	0.0
TRPV3	162514	symbol	H. sapiens	162514	H. sapiens	TRPV3	transient receptor potential cation channel subfamily V member 3	GO:0042636 negative regulation of hair cycle;GO:0090280 positive regulation of calcium ion import;GO:0098703 calcium ion import across plasma membrane		FDA approved drug targets:Small molecule drugs; Disease related genes	Plasma membrane (Approved); Additional: Centrosome;Cytosol	Levomenthol; Camphor; Cannabidiol; Eugenol; (S)-camphor; Medical Cannabis; Nabiximols			0.0	0.0	0.0	0.0	0.0	0.0	0.0	0.0	0.0	0.0	0.0	0.0	0.0	0.0	1.0	0.0	0.0	0.0	0.0	0.0
CARD6	84674	symbol	H. sapiens	84674	H. sapiens	CARD6	caspase recruitment domain family member 6	GO:0042981 regulation of apoptotic process;GO:0043067 regulation of programmed cell death;GO:0010941 regulation of cell death		Predicted intracellular proteins					0.0	0.0	0.0	0.0	0.0	0.0	0.0	0.0	0.0	0.0	0.0	0.0	0.0	0.0	0.0	0.0	0.0	0.0	0.0	0.0
ZADH2	284273	symbol	H. sapiens	284273	H. sapiens	ZADH2	zinc binding alcohol dehydrogenase domain containing 2	GO:0006692 prostanoid metabolic process;GO:0006693 prostaglandin metabolic process;GO:0045599 negative regulation of fat cell differentiation		Predicted intracellular proteins; Enzymes; ENZYME proteins:Oxidoreductases	Vesicles (Approved); Additional: Golgi apparatus;Nucleoplasm				0.0	0.0	0.0	0.0	0.0	0.0	0.0	0.0	1.0	0.0	0.0	0.0	0.0	0.0	0.0	0.0	0.0	0.0	0.0	0.0
NINJ2	4815	symbol	H. sapiens	4815	H. sapiens	NINJ2	ninjurin 2	GO:0007158 neuron cell-cell adhesion;GO:0042246 tissue regeneration;GO:0031099 regeneration			Endoplasmic reticulum (Approved); Additional: Centriolar satellite;Cytosol;Nucleoplasm;Plasma membrane				0.0	0.0	0.0	0.0	0.0	0.0	0.0	0.0	0.0	0.0	0.0	0.0	0.0	0.0	0.0	0.0	0.0	0.0	0.0	0.0
MMP2	4313	symbol	H. sapiens	4313	H. sapiens	MMP2	matrix metallopeptidase 2	GO:0001957 intramembranous ossification;GO:0036072 direct ossification;GO:0001955 blood vessel maturation		Cancer-related genes:Candidate cancer biomarkers; Candidate cardiovascular disease genes; Predicted intracellular proteins; Predicted secreted proteins; FDA approved drug targets:Small molecule drugs; ENZYME proteins:Hydrolases; Enzymes; Disease related genes; Cancer-related genes:Mutational cancer driver genes; Peptidases:Metallopeptidases	Vesicles (Approved)	Marimastat; Captopril; SC-74020; Halofuginone; AE-941; Endostatin	(M63)PID AVB3 OPN PATHWAY; (M240)PID SYNDECAN 2 PATHWAY; (M65)PID FRA PATHWAY	(M5946)HALLMARK COAGULATION; (M5902)HALLMARK APOPTOSIS; (M5915)HALLMARK APICAL JUNCTION	1.0	1.0	0.0	0.0	0.0	1.0	0.0	0.0	0.0	1.0	1.0	1.0	0.0	0.0	0.0	1.0	1.0	0.0	0.0	1.0
BACE1	23621	symbol	H. sapiens	23621	H. sapiens	BACE1	beta-secretase 1	GO:0060134 prepulse inhibition;GO:0071287 cellular response to manganese ion;GO:0050966 detection of mechanical stimulus involved in sensory perception of pain		Transporters:Accessory Factors Involved in Transport; Predicted intracellular proteins; ENZYME proteins:Hydrolases; Enzymes; Peptidases:Aspartic-type peptidases	Plasma membrane (Supported)	MMI-175; CTS-21166; N-[amino(imino)methyl]-2-(2,5-diphenyl-1H-pyrrol-1-yl)acetamide; N-[(5R,14R)-5-AMINO-5,14-DIMETHYL-4-OXO-3-OXA-18-AZATRICYCLO[15.3.1.1~7,11~]DOCOSA-1(21),7(22),8,10,17,19-HEXAEN-19-YL]-N-METHYLMETHANESULFONAMIDE; N-[amino(imino)methyl]-2-[2-(2-chlorophenyl)-4-(4-propoxyphenyl)-3-thienyl]acetamide; 4-(4-FLUOROBENZYL)PIPERIDINE; N-{2-methyl-5-[(6-phenylpyrimidin-4-yl)amino]pheny…			1.0	0.0	0.0	0.0	0.0	0.0	0.0	0.0	0.0	1.0	0.0	1.0	0.0	0.0	0.0	0.0	0.0	0.0	0.0	1.0
LVCAT1	100506827	gene_synonym	H. sapiens	100506827	H. sapiens	LINC02475	long intergenic non-protein coding RNA 2475								0.0	0.0	0.0	0.0	0.0	0.0	0.0	0.0	0.0	0.0	0.0	0.0	0.0	0.0	0.0	0.0	0.0	0.0	0.0	0.0
PERM1	84808	symbol	H. sapiens	84808	H. sapiens	PERM1	PPARGC1 and ESRR induced regulator, muscle 1	GO:0014850 response to muscle activity;GO:0014823 response to activity;GO:0006355 regulation of transcription, DNA-templated		Predicted intracellular proteins					0.0	0.0	0.0	0.0	0.0	0.0	0.0	0.0	0.0	0.0	0.0	0.0	0.0	0.0	0.0	0.0	0.0	0.0	0.0	0.0
FOXO1	2308	symbol	H. sapiens	2308	H. sapiens	FOXO1	forkhead box O1	GO:1902617 response to fluoride;GO:0071455 cellular response to hyperoxia;GO:0010616 negative regulation of cardiac muscle adaptation		Cancer-related genes:Candidate cancer biomarkers; Predicted intracellular proteins; Disease related genes; Transcription factors:Helix-turn-helix domains	Cytosol;Nucleoplasm (Supported)		(M32)PID HDAC CLASSIII PATHWAY; (M249)PID PI3KCI AKT PATHWAY; (M14532)ST PHOSPHOINOSITIDE 3 KINASE PATHWAY	(M5957)HALLMARK PANCREAS BETA CELLS	0.0	1.0	0.0	0.0	0.0	0.0	0.0	0.0	0.0	0.0	1.0	0.0	0.0	0.0	0.0	0.0	0.0	0.0	1.0	1.0
IRAK3	11213	symbol	H. sapiens	11213	H. sapiens	IRAK3	interleukin 1 receptor associated kinase 3	GO:0010931 macrophage tolerance induction;GO:0010932 regulation of macrophage tolerance induction;GO:0010933 positive regulation of macrophage tolerance induction	TKL Ser/Thr protein kinase family	ENZYME proteins:Transferases; Predicted intracellular proteins; Enzymes; Disease related genes; Potential drug targets; Kinases:TKL Ser/Thr protein kinases	Vesicles (Approved)	Fostamatinib	(M110)PID IL1 PATHWAY		0.0	1.0	0.0	0.0	0.0	0.0	1.0	0.0	0.0	1.0	1.0	0.0	1.0	0.0	0.0	0.0	0.0	0.0	0.0	0.0
TRPA1	8989	symbol	H. sapiens	8989	H. sapiens	TRPA1	transient receptor potential cation channel subfamily A member 1	GO:0050968 detection of chemical stimulus involved in sensory perception of pain;GO:0050955 thermoception;GO:0050966 detection of mechanical stimulus involved in sensory perception of pain		Transporters:Transporter channels and pores; FDA approved drug targets:Small molecule drugs; Voltage-gated ion channels:Transient Receptor Potential Channels; Disease related genes		Levomenthol; Camphor; Cannabidiol; Butamben; (S)-camphor; Tetrahydrocannabivarin; Medical Cannabis; Nabiximols; Cannabidivarin			0.0	0.0	0.0	0.0	0.0	0.0	0.0	0.0	0.0	0.0	0.0	0.0	0.0	0.0	1.0	0.0	0.0	0.0	0.0	0.0
CACNA1G	8913	symbol	H. sapiens	8913	H. sapiens	CACNA1G	calcium voltage-gated channel subunit alpha1 G	GO:0010045 response to nickel cation;GO:0086046 membrane depolarization during SA node cell action potential;GO:0086045 membrane depolarization during AV node cell action potential		FDA approved drug targets:Small molecule drugs; Disease related genes; Voltage-gated ion channels:Voltage-Gated Calcium Channels		Trimethadione; Cinnarizine; Ethosuximide; Verapamil; Zonisamide; Nifedipine; Mibefradil; Flunarizine; Methsuximide; Cannabidiol; Trimebutine; Benidipine; Manidipine; Bioallethrin; Medical Cannabis; Nabiximols	(M223)PID BETA CATENIN NUC PATHWAY		0.0	0.0	0.0	0.0	0.0	0.0	0.0	0.0	0.0	0.0	0.0	0.0	0.0	0.0	1.0	0.0	0.0	0.0	0.0	0.0
ACSL5	51703	symbol	H. sapiens	51703	H. sapiens	ACSL5	acyl-CoA synthetase long chain family member 5	GO:0010747 positive regulation of long-chain fatty acid import across plasma membrane;GO:0140214 positive regulation of long-chain fatty acid import into cell;GO:0010746 regulation of long-chain fatty acid import across plasma membrane		Enzymes; ENZYME proteins:Ligase	Mitochondria (Supported); Additional: Nucleoplasm			(M5949)HALLMARK PEROXISOME; (M5948)HALLMARK BILE ACID METABOLISM; (M5935)HALLMARK FATTY ACID METABOLISM	0.0	0.0	0.0	0.0	0.0	0.0	0.0	0.0	1.0	0.0	0.0	0.0	0.0	0.0	0.0	0.0	0.0	0.0	0.0	0.0
GPER1	2852	symbol	H. sapiens	2852	H. sapiens	GPER1	G protein-coupled estrogen receptor 1	GO:0030264 nuclear fragmentation involved in apoptotic nuclear change;GO:2000724 positive regulation of cardiac vascular smooth muscle cell differentiation;GO:0030263 apoptotic chromosome condensation		Predicted intracellular proteins; Transporters; G-protein coupled receptors:GPCRs excl olfactory receptors	Nucleoli (Approved); Additional: Cytosol;Nucleoplasm;Vesicles	Estradiol; Genistein; MK-0354; Estradiol acetate; Estradiol benzoate; Estradiol cypionate; Estradiol dienanthate; Estradiol valerate		(M5907)HALLMARK ESTROGEN RESPONSE LATE	0.0	0.0	0.0	0.0	0.0	0.0	1.0	1.0	1.0	1.0	1.0	0.0	0.0	0.0	1.0	0.0	0.0	0.0	0.0	1.0
PSG10P	653492	symbol	H. sapiens	653492	H. sapiens	PSG10P	pregnancy specific beta-1-glycoprotein 10, pseudogene								0.0	0.0	0.0	0.0	0.0	0.0	0.0	0.0	0.0	0.0	0.0	0.0	0.0	0.0	0.0	0.0	0.0	0.0	0.0	0.0
LOC101928370	101928370	Gene_ID	H. sapiens	101928370	H. sapiens	LOC101928370	uncharacterized LOC101928370								0.0	0.0	0.0	0.0	0.0	0.0	0.0	0.0	0.0	0.0	0.0	0.0	0.0	0.0	0.0	0.0	0.0	0.0	0.0	0.0
SERPINB8	5271	symbol	H. sapiens	5271	H. sapiens	SERPINB8	serpin family B member 8	GO:0090136 epithelial cell-cell adhesion;GO:0010951 negative regulation of endopeptidase activity;GO:0010466 negative regulation of peptidase activity		Predicted intracellular proteins; Disease related genes	Nucleoplasm (Approved); Additional: Cytosol		(M3468)NABA ECM REGULATORS; (M5885)NABA MATRISOME ASSOCIATED; (M5889)NABA MATRISOME	(M5890)HALLMARK TNFA SIGNALING VIA NFKB	0.0	0.0	0.0	0.0	0.0	0.0	0.0	0.0	0.0	1.0	0.0	0.0	0.0	1.0	0.0	0.0	0.0	0.0	0.0	0.0
LPXN	9404	symbol	H. sapiens	9404	H. sapiens	LPXN	leupaxin	GO:0050859 negative regulation of B cell receptor signaling pathway;GO:0050855 regulation of B cell receptor signaling pathway;GO:0050858 negative regulation of antigen receptor-mediated signaling pathway		Predicted intracellular proteins	Focal adhesion sites (Supported); Additional: Cytosol;Nuclear speckles				0.0	0.0	1.0	0.0	0.0	0.0	1.0	0.0	0.0	0.0	0.0	0.0	0.0	0.0	0.0	0.0	0.0	0.0	0.0	0.0
PRIMA1	145270	symbol	H. sapiens	145270	H. sapiens	PRIMA1	proline rich membrane anchor 1	GO:0042135 neurotransmitter catabolic process;GO:0042133 neurotransmitter metabolic process;GO:0001505 regulation of neurotransmitter levels			Plasma membrane (Approved); Additional: Cytosol;Nucleoli				0.0	0.0	0.0	0.0	0.0	0.0	0.0	0.0	0.0	0.0	0.0	0.0	0.0	0.0	0.0	0.0	0.0	0.0	0.0	0.0
LINC00702	100652988	symbol	H. sapiens	100652988	H. sapiens	LINC00702	long intergenic non-protein coding RNA 702								0.0	0.0	0.0	0.0	0.0	0.0	0.0	0.0	0.0	0.0	0.0	0.0	0.0	0.0	0.0	0.0	0.0	0.0	0.0	0.0
CHI3L2	1117	symbol	H. sapiens	1117	H. sapiens	CHI3L2	chitinase 3 like 2	GO:0006030 chitin metabolic process;GO:0006032 chitin catabolic process;GO:1901072 glucosamine-containing compound catabolic process		Predicted intracellular proteins; Predicted secreted proteins					0.0	0.0	0.0	0.0	0.0	0.0	0.0	0.0	0.0	0.0	0.0	0.0	0.0	0.0	0.0	0.0	0.0	0.0	0.0	0.0
IL13RA2	3598	symbol	H. sapiens	3598	H. sapiens	IL13RA2	interleukin 13 receptor subunit alpha 2	GO:0043305 negative regulation of mast cell degranulation;GO:0033007 negative regulation of mast cell activation involved in immune response;GO:0002887 negative regulation of myeloid leukocyte mediated immunity		Cancer-related genes:Candidate cancer biomarkers; CD markers	Cell Junctions;Plasma membrane (Approved); Additional: Nucleoplasm;Vesicles	AER001	(M17580)ST IL 13 PATHWAY; (M28)PID IL4 2PATHWAY	(M5951)HALLMARK SPERMATOGENESIS	0.0	1.0	0.0	0.0	0.0	0.0	1.0	0.0	0.0	0.0	0.0	0.0	0.0	0.0	0.0	0.0	0.0	0.0	0.0	0.0
MSL3	10943	symbol	H. sapiens	10943	H. sapiens	MSL3	MSL complex subunit 3	GO:0043968 histone H2A acetylation;GO:0043984 histone H4-K16 acetylation;GO:0043967 histone H4 acetylation		Predicted intracellular proteins	Nucleoplasm (Approved)				0.0	0.0	0.0	0.0	0.0	0.0	0.0	0.0	0.0	0.0	0.0	0.0	0.0	0.0	0.0	0.0	0.0	0.0	0.0	0.0
METAP1	23173	symbol	H. sapiens	23173	H. sapiens	METAP1	methionyl aminopeptidase 1	GO:0070084 protein initiator methionine removal;GO:0018206 peptidyl-methionine modification;GO:0031365 N-terminal protein amino acid modification		Predicted intracellular proteins; ENZYME proteins:Hydrolases; Enzymes; Peptidases:Metallopeptidases	Cytosol (Approved); Additional: Nucleoplasm;Plasma membrane	Ovalicin; 5-CHLORO-6-METHYL-N-(2-PHENYLETHYL)-2-PYRIDIN-2-YLPYRIMIDIN-4-AMINE; TERT-BUTYL {2-[(1,3-THIAZOL-2-YLAMINO)CARBONYL]PYRIDIN-3-YL}CARBAMATE; 3-[(2,2-DIMETHYLPROPANOYL)AMINO]-N-1,3-THIAZOL-2-YLPYRIDINE-2-CARBOXAMIDE		(M5935)HALLMARK FATTY ACID METABOLISM	0.0	0.0	0.0	0.0	0.0	0.0	0.0	0.0	0.0	0.0	0.0	0.0	0.0	0.0	0.0	0.0	0.0	0.0	0.0	0.0
HTRA1	5654	symbol	H. sapiens	5654	H. sapiens	HTRA1	HtrA serine peptidase 1	GO:0060718 chorionic trophoblast cell differentiation;GO:0097187 dentinogenesis;GO:0060717 chorion development		Predicted intracellular proteins; Predicted secreted proteins; Peptidases:Serine-type peptidases; Enzymes; Disease related genes; Potential drug targets	Plasma membrane (Supported)		(M3468)NABA ECM REGULATORS; (M5885)NABA MATRISOME ASSOCIATED; (M5889)NABA MATRISOME	(M5946)HALLMARK COAGULATION; (M5930)HALLMARK EPITHELIAL MESENCHYMAL TRANSITION	1.0	0.0	1.0	0.0	0.0	0.0	1.0	0.0	0.0	1.0	0.0	0.0	0.0	0.0	0.0	0.0	0.0	0.0	0.0	0.0
FXYD5	53827	symbol	H. sapiens	53827	H. sapiens	FXYD5	FXYD domain containing ion transport regulator 5	GO:0046588 negative regulation of calcium-dependent cell-cell adhesion;GO:0046586 regulation of calcium-dependent cell-cell adhesion;GO:0030033 microvillus assembly		Transporters:Transporter channels and pores	Endoplasmic reticulum (Approved)				0.0	0.0	0.0	0.0	1.0	0.0	0.0	0.0	0.0	0.0	0.0	0.0	0.0	0.0	1.0	0.0	0.0	0.0	0.0	0.0
LINC00595	414243	symbol	H. sapiens	414243	H. sapiens	LINC00595	long intergenic non-protein coding RNA 595								0.0	0.0	0.0	0.0	0.0	0.0	0.0	0.0	0.0	0.0	0.0	0.0	0.0	0.0	0.0	0.0	0.0	0.0	0.0	0.0
HYLS1	219844	symbol	H. sapiens	219844	H. sapiens	HYLS1	HYLS1 centriolar and ciliogenesis associated	GO:0060271 cilium assembly;GO:0044782 cilium organization;GO:0120031 plasma membrane bounded cell projection assembly		Predicted intracellular proteins; Disease related genes	Cytosol;Plasma membrane (Supported)				0.0	0.0	0.0	0.0	1.0	0.0	0.0	0.0	0.0	0.0	0.0	0.0	0.0	0.0	0.0	0.0	0.0	0.0	0.0	0.0
TC2N	123036	symbol	H. sapiens	123036	H. sapiens	TC2N	tandem C2 domains, nuclear			Predicted intracellular proteins	Nuclear bodies;Nucleoplasm (Approved)				0.0	0.0	0.0	0.0	0.0	0.0	0.0	0.0	0.0	0.0	0.0	0.0	0.0	0.0	0.0	0.0	0.0	0.0	0.0	0.0
DYNC1I1	1780	symbol	H. sapiens	1780	H. sapiens	DYNC1I1	dynein cytoplasmic 1 intermediate chain 1	GO:0047496 vesicle transport along microtubule;GO:0099518 vesicle cytoskeletal trafficking;GO:0072384 organelle transport along microtubule		Predicted intracellular proteins					0.0	0.0	0.0	0.0	0.0	0.0	0.0	0.0	0.0	0.0	0.0	0.0	0.0	0.0	0.0	0.0	0.0	0.0	0.0	0.0
AKR1C2	1646	symbol	H. sapiens	1646	H. sapiens	AKR1C2	aldo-keto reductase family 1 member C2	GO:0009753 response to jasmonic acid;GO:0071395 cellular response to jasmonic acid stimulus;GO:0071798 response to prostaglandin D		Predicted intracellular proteins; FDA approved drug targets:Small molecule drugs; Enzymes; ENZYME proteins:Oxidoreductases; Disease related genes	Cytosol;Nucleoplasm (Approved); Additional: Endoplasmic reticulum;Nucleoli fibrillar center	NADH; Ursodeoxycholic acid; Nicotinamide adenine dinucleotide phosphate; Chenodeoxycholic acid; Epitestosterone		(M5934)HALLMARK XENOBIOTIC METABOLISM	0.0	0.0	0.0	0.0	0.0	0.0	0.0	0.0	1.0	0.0	0.0	0.0	0.0	0.0	0.0	0.0	0.0	0.0	0.0	1.0
FEZ1	9638	symbol	H. sapiens	9638	H. sapiens	FEZ1	fasciculation and elongation protein zeta 1	GO:0061880 regulation of anterograde axonal transport of mitochondrion;GO:0061881 positive regulation of anterograde axonal transport of mitochondrion;GO:0098957 anterograde axonal transport of mitochondrion		Predicted intracellular proteins	Cytosol;Microtubules (Approved)			(M5902)HALLMARK APOPTOSIS	0.0	0.0	1.0	1.0	0.0	0.0	0.0	1.0	0.0	0.0	0.0	0.0	0.0	0.0	0.0	0.0	0.0	0.0	0.0	0.0
RAET1E	135250	symbol	H. sapiens	135250	H. sapiens	RAET1E	retinoic acid early transcript 1E	GO:0045954 positive regulation of natural killer cell mediated cytotoxicity;GO:0002717 positive regulation of natural killer cell mediated immunity;GO:0042269 regulation of natural killer cell mediated cytotoxicity		Predicted intracellular proteins	Focal adhesion sites (Supported); Additional: Cytosol				0.0	0.0	0.0	0.0	0.0	0.0	1.0	1.0	0.0	0.0	0.0	0.0	0.0	0.0	0.0	0.0	0.0	0.0	0.0	0.0
ZDHHC6	64429	symbol	H. sapiens	64429	H. sapiens	ZDHHC6	zinc finger DHHC-type palmitoyltransferase 6	GO:0010636 positive regulation of mitochondrial fusion;GO:0010635 regulation of mitochondrial fusion;GO:0018230 peptidyl-L-cysteine S-palmitoylation		ENZYME proteins:Transferases; Enzymes					0.0	0.0	0.0	0.0	0.0	0.0	0.0	0.0	0.0	0.0	0.0	0.0	0.0	0.0	0.0	0.0	0.0	0.0	0.0	0.0
GLIPR2	152007	symbol	H. sapiens	152007	H. sapiens	GLIPR2	GLI pathogenesis related 2	GO:0010718 positive regulation of epithelial to mesenchymal transition;GO:0010717 regulation of epithelial to mesenchymal transition;GO:0001837 epithelial to mesenchymal transition		Predicted intracellular proteins	Vesicles (Uncertain); Additional: Microtubules	L-cysteic acid		(M5947)HALLMARK IL2 STAT5 SIGNALING	0.0	0.0	0.0	0.0	0.0	0.0	0.0	1.0	0.0	0.0	1.0	0.0	0.0	0.0	0.0	0.0	0.0	0.0	0.0	0.0
RAET1G	353091	symbol	H. sapiens	353091	H. sapiens	RAET1G	retinoic acid early transcript 1G	GO:0002729 positive regulation of natural killer cell cytokine production;GO:0002370 natural killer cell cytokine production;GO:0002727 regulation of natural killer cell cytokine production		Predicted secreted proteins	Vesicles (Approved)				0.0	0.0	0.0	0.0	0.0	0.0	1.0	1.0	0.0	0.0	0.0	0.0	1.0	0.0	0.0	0.0	0.0	0.0	0.0	0.0
ENPP5	59084	symbol	H. sapiens	59084	H. sapiens	ENPP5	ectonucleotide pyrophosphatase/phosphodiesterase family member 5	GO:0007154 cell communication;GO:0009987 cellular process;GO:0008150 biological_process			Cytosol (Approved); Additional: Nucleoplasm				0.0	0.0	0.0	0.0	0.0	0.0	0.0	0.0	0.0	0.0	0.0	0.0	0.0	0.0	0.0	0.0	0.0	0.0	0.0	0.0
S1PR1	1901	symbol	H. sapiens	1901	H. sapiens	S1PR1	sphingosine-1-phosphate receptor 1	GO:0003245 cardiac muscle tissue growth involved in heart morphogenesis;GO:0003241 growth involved in heart morphogenesis;GO:0001955 blood vessel maturation		Cancer-related genes:Candidate cancer biomarkers; G-protein coupled receptors:Lysolipids receptors; CD markers; Transporters; FDA approved drug targets:Biotech drugs; G-protein coupled receptors:GPCRs excl olfactory receptors	Vesicles (Supported)	Fingolimod; Asfotase alfa; Siponimod; Ozanimod	(M103)PID S1P S1P1 PATHWAY; (M155)PID S1P META PATHWAY; (M55)PID S1P S1P3 PATHWAY		1.0	1.0	0.0	0.0	1.0	0.0	0.0	1.0	0.0	0.0	0.0	0.0	0.0	0.0	1.0	1.0	0.0	0.0	0.0	0.0
ZNF137P	7696	symbol	H. sapiens	7696	H. sapiens	ZNF137P	zinc finger protein 137, pseudogene								0.0	0.0	0.0	0.0	0.0	0.0	0.0	0.0	0.0	0.0	0.0	0.0	0.0	0.0	0.0	0.0	0.0	0.0	0.0	0.0
HOXC10	3226	symbol	H. sapiens	3226	H. sapiens	HOXC10	homeobox C10	GO:0120163 negative regulation of cold-induced thermogenesis;GO:0106106 cold-induced thermogenesis;GO:0120161 regulation of cold-induced thermogenesis		Predicted intracellular proteins; Transcription factors:Helix-turn-helix domains	Nuclear bodies (Supported); Additional: Nucleoplasm			(M5901)HALLMARK G2M CHECKPOINT	0.0	0.0	0.0	0.0	0.0	0.0	0.0	0.0	0.0	0.0	0.0	0.0	0.0	0.0	0.0	0.0	0.0	0.0	0.0	0.0
CYB5A	1528	symbol	H. sapiens	1528	H. sapiens	CYB5A	cytochrome b5 type A	GO:0046686 response to cadmium ion;GO:1902600 proton transmembrane transport;GO:0022900 electron transport chain		Predicted intracellular proteins; Disease related genes	Cytosol;Vesicles (Enhanced)	Dimethyl Propionate Ester Heme; Chromium; Chromic citrate; Chromic nitrate; Chromium gluconate; Chromium nicotinate; Chromous sulfate		(M5934)HALLMARK XENOBIOTIC METABOLISM; (M5936)HALLMARK OXIDATIVE PHOSPHORYLATION; (M5937)HALLMARK GLYCOLYSIS	0.0	0.0	0.0	0.0	0.0	0.0	0.0	0.0	0.0	0.0	0.0	0.0	0.0	0.0	1.0	0.0	0.0	0.0	0.0	0.0
EMX2OS	196047	symbol	H. sapiens	196047	H. sapiens	EMX2OS	EMX2 opposite strand/antisense RNA								0.0	0.0	0.0	0.0	0.0	0.0	0.0	0.0	0.0	0.0	0.0	0.0	0.0	0.0	0.0	0.0	0.0	0.0	0.0	0.0
ZNF41	7592	symbol	H. sapiens	7592	H. sapiens	ZNF41	zinc finger protein 41	GO:0006357 regulation of transcription by RNA polymerase II;GO:0006366 transcription by RNA polymerase II;GO:0006355 regulation of transcription, DNA-templated		Transcription factors:Zinc-coordinating DNA-binding domains; Disease related genes; Predicted intracellular proteins	Nucleoplasm (Approved)				0.0	0.0	0.0	0.0	0.0	0.0	0.0	0.0	0.0	0.0	0.0	0.0	0.0	0.0	0.0	0.0	0.0	0.0	0.0	0.0
LRRC34	151827	symbol	H. sapiens	151827	H. sapiens	LRRC34	leucine rich repeat containing 34	GO:0030154 cell differentiation;GO:0048869 cellular developmental process;GO:0032502 developmental process		Predicted intracellular proteins	Cell Junctions;Microtubules (Approved); Additional: Cytokinetic bridge;Mitotic spindle				0.0	0.0	0.0	0.0	0.0	0.0	0.0	0.0	0.0	0.0	0.0	0.0	0.0	0.0	0.0	0.0	0.0	0.0	0.0	0.0
SNX21	90203	symbol	H. sapiens	90203	H. sapiens	SNX21	sorting nexin family member 21	GO:0015031 protein transport;GO:0045184 establishment of protein localization;GO:0071705 nitrogen compound transport		Predicted intracellular proteins	Centriolar satellite;Vesicles (Approved)				0.0	0.0	0.0	0.0	0.0	0.0	0.0	0.0	0.0	0.0	0.0	0.0	0.0	0.0	0.0	0.0	0.0	0.0	0.0	0.0
NOSTRIN	115677	symbol	H. sapiens	115677	H. sapiens	NOSTRIN	nitric oxide synthase trafficking	GO:0006897 endocytosis;GO:0045892 negative regulation of transcription, DNA-templated;GO:1903507 negative regulation of nucleic acid-templated transcription		Predicted intracellular proteins	Cytosol (Approved); Additional: Vesicles				0.0	0.0	0.0	0.0	0.0	0.0	0.0	0.0	0.0	0.0	0.0	0.0	0.0	0.0	0.0	0.0	0.0	0.0	0.0	0.0
ANTXR1	84168	symbol	H. sapiens	84168	H. sapiens	ANTXR1	ANTXR cell adhesion molecule 1	GO:1901202 negative regulation of extracellular matrix assembly;GO:1905050 positive regulation of metallopeptidase activity;GO:1903054 negative regulation of extracellular matrix organization		Predicted intracellular proteins; Disease related genes	Vesicles (Uncertain)	MDX-1303	(M267)PID ANTHRAX PATHWAY		1.0	0.0	0.0	0.0	0.0	0.0	0.0	0.0	0.0	0.0	0.0	0.0	0.0	0.0	0.0	0.0	0.0	0.0	0.0	0.0
FASTKD3	79072	symbol	H. sapiens	79072	H. sapiens	FASTKD3	FAST kinase domains 3	GO:0044528 regulation of mitochondrial mRNA stability;GO:0070131 positive regulation of mitochondrial translation;GO:0033617 mitochondrial cytochrome c oxidase assembly		Predicted intracellular proteins	Mitochondria;Nucleoplasm (Supported)				0.0	0.0	0.0	0.0	0.0	0.0	0.0	0.0	0.0	0.0	0.0	0.0	0.0	0.0	0.0	0.0	0.0	0.0	0.0	0.0
KDR	3791	symbol	H. sapiens	3791	H. sapiens	KDR	kinase insert domain receptor	GO:1904881 cellular response to hydrogen sulfide;GO:1904880 response to hydrogen sulfide;GO:0038033 positive regulation of endothelial cell chemotaxis by VEGF-activated vascular endothelial growth factor receptor signaling pathway	Tyr protein kinase family	Cancer-related genes:Candidate cancer biomarkers; ENZYME proteins:Transferases; Kinases:Tyr protein kinases; CD markers; RAS pathway related proteins; FDA approved drug targets:Biotech drugs; FDA approved drug targets:Small molecule drugs; Enzymes; Disease related genes	Plasma membrane (Supported)	Sorafenib; Sunitinib; 1-{4-[4-Amino-6-(4-methoxyphenyl)furo[2,3-d]pyrimidin-5-yl]phenyl}-3-[2-fluoro-5-(trifluoromethyl)phenyl]urea; Cediranib; Vatalanib; XL999; TG-100801; XL820; CYC116; Ramucirumab; Pegdinetanib; RAF-265; ABT-869; IMC-1C11; Semaxanib; Pazopanib; Midostaurin; Axitinib; 4-[[2-[[4-chloro-3-(trifluoromethyl)phenyl]amino]-3H-benzimidazol-5-yl]oxy]-N-methyl-pyridine-2-carboxamide; N-…	(M137)PID VEGF VEGFR PATHWAY; (M103)PID S1P S1P1 PATHWAY; (M44)PID HIF2PATHWAY		1.0	0.0	1.0	1.0	0.0	0.0	0.0	1.0	0.0	0.0	1.0	0.0	0.0	0.0	1.0	0.0	0.0	0.0	0.0	0.0
HSD3B7	80270	symbol	H. sapiens	80270	H. sapiens	HSD3B7	hydroxy-delta-5-steroid dehydrogenase, 3 beta- and steroid delta-isomerase 7	GO:0035754 B cell chemotaxis;GO:0006699 bile acid biosynthetic process;GO:0008206 bile acid metabolic process		Predicted intracellular proteins; Enzymes; ENZYME proteins:Oxidoreductases; Disease related genes; Potential drug targets	Lipid droplets (Enhanced)			(M5949)HALLMARK PEROXISOME; (M5948)HALLMARK BILE ACID METABOLISM	0.0	0.0	0.0	0.0	0.0	0.0	0.0	1.0	1.0	0.0	0.0	0.0	0.0	0.0	0.0	0.0	0.0	0.0	0.0	0.0
CYP26B1	56603	symbol	H. sapiens	56603	H. sapiens	CYP26B1	cytochrome P450 family 26 subfamily B member 1	GO:0035981 tongue muscle cell differentiation;GO:2001035 regulation of tongue muscle cell differentiation;GO:2001037 positive regulation of tongue muscle cell differentiation		Predicted intracellular proteins; Disease related genes	Cytosol (Approved)	Tretinoin		(M5906)HALLMARK ESTROGEN RESPONSE EARLY; (M5907)HALLMARK ESTROGEN RESPONSE LATE	0.0	0.0	0.0	0.0	0.0	1.0	1.0	0.0	1.0	0.0	1.0	0.0	0.0	0.0	0.0	0.0	0.0	0.0	0.0	1.0
EMP1	2012	symbol	H. sapiens	2012	H. sapiens	EMP1	epithelial membrane protein 1	GO:0032060 bleb assembly;GO:0008544 epidermis development;GO:0120031 plasma membrane bounded cell projection assembly		Predicted intracellular proteins	Nucleoplasm (Approved)			(M5902)HALLMARK APOPTOSIS; (M5947)HALLMARK IL2 STAT5 SIGNALING; (M5953)HALLMARK KRAS SIGNALING UP	0.0	0.0	0.0	0.0	1.0	0.0	0.0	0.0	0.0	0.0	0.0	0.0	0.0	0.0	0.0	0.0	0.0	0.0	0.0	0.0
SHE	126669	symbol	H. sapiens	126669	H. sapiens	SHE	Src homology 2 domain containing E			Predicted intracellular proteins; Predicted secreted proteins				(M5951)HALLMARK SPERMATOGENESIS; (M5947)HALLMARK IL2 STAT5 SIGNALING	0.0	0.0	0.0	0.0	0.0	0.0	0.0	0.0	0.0	0.0	0.0	0.0	0.0	0.0	0.0	0.0	0.0	0.0	0.0	0.0
ASPA	443	symbol	H. sapiens	443	H. sapiens	ASPA	aspartoacylase	GO:0006533 aspartate catabolic process;GO:0006531 aspartate metabolic process;GO:0009068 aspartate family amino acid catabolic process		Predicted intracellular proteins; ENZYME proteins:Hydrolases; Enzymes; Disease related genes; Potential drug targets	Cytosol (Approved)	Aspartic acid; Zinc; Zinc acetate; Zinc chloride; Zinc sulfate, unspecified form			0.0	0.0	0.0	0.0	0.0	0.0	0.0	0.0	0.0	0.0	0.0	0.0	0.0	0.0	0.0	0.0	0.0	0.0	1.0	0.0
GANC	2595	symbol	H. sapiens	2595	H. sapiens	GANC	glucosidase alpha, neutral C	GO:0000023 maltose metabolic process;GO:0005984 disaccharide metabolic process;GO:0006491 N-glycan processing		Predicted intracellular proteins; FDA approved drug targets:Small molecule drugs; ENZYME proteins:Hydrolases; Enzymes	Cytosol (Approved)	Miglitol			0.0	0.0	0.0	0.0	0.0	0.0	0.0	0.0	0.0	0.0	1.0	0.0	0.0	0.0	0.0	0.0	0.0	0.0	0.0	0.0
TSHZ1	10194	symbol	H. sapiens	10194	H. sapiens	TSHZ1	teashirt zinc finger homeobox 1	GO:0060023 soft palate development;GO:0042474 middle ear morphogenesis;GO:0062009 secondary palate development		Predicted intracellular proteins; Disease related genes; Transcription factors:Helix-turn-helix domains	Nucleoplasm (Approved)				0.0	0.0	0.0	0.0	0.0	1.0	0.0	0.0	0.0	0.0	0.0	0.0	0.0	0.0	0.0	0.0	0.0	0.0	0.0	0.0
ACSS3	79611	symbol	H. sapiens	79611	H. sapiens	ACSS3	acyl-CoA synthetase short chain family member 3	GO:0046951 ketone body biosynthetic process;GO:0046950 cellular ketone body metabolic process;GO:1902224 ketone body metabolic process		Enzymes; ENZYME proteins:Ligase	Mitochondria (Supported)				0.0	0.0	0.0	0.0	0.0	0.0	0.0	0.0	1.0	0.0	0.0	0.0	0.0	0.0	0.0	0.0	0.0	0.0	0.0	0.0
IL1RAP	3556	symbol	H. sapiens	3556	H. sapiens	IL1RAP	interleukin 1 receptor accessory protein	GO:0038172 interleukin-33-mediated signaling pathway;GO:0099545 trans-synaptic signaling by trans-synaptic complex;GO:0032754 positive regulation of interleukin-5 production		Predicted intracellular proteins; Predicted secreted proteins	Cytosol;Vesicles (Approved)		(M110)PID IL1 PATHWAY; (M19)PID P73PATHWAY		0.0	1.0	0.0	0.0	0.0	0.0	0.0	0.0	0.0	0.0	0.0	0.0	0.0	0.0	0.0	0.0	0.0	0.0	0.0	0.0
LINC00673	100499467	symbol	H. sapiens	100499467	H. sapiens	LINC00673	long intergenic non-protein coding RNA 673								0.0	0.0	0.0	0.0	0.0	0.0	0.0	0.0	0.0	0.0	0.0	0.0	0.0	0.0	0.0	0.0	0.0	0.0	0.0	0.0
CLEC12A	160364	symbol	H. sapiens	160364	H. sapiens	CLEC12A	C-type lectin domain family 12 member A			Predicted intracellular proteins			(M5880)NABA ECM AFFILIATED; (M5885)NABA MATRISOME ASSOCIATED; (M5889)NABA MATRISOME		0.0	0.0	0.0	0.0	0.0	0.0	0.0	0.0	0.0	1.0	0.0	0.0	0.0	0.0	0.0	0.0	0.0	0.0	0.0	0.0
CNRIP1	25927	symbol	H. sapiens	25927	H. sapiens	CNRIP1	cannabinoid receptor interacting protein 1	GO:2000272 negative regulation of signaling receptor activity;GO:0010469 regulation of signaling receptor activity;GO:0044092 negative regulation of molecular function		Predicted intracellular proteins	Cytosol (Approved)				0.0	0.0	0.0	0.0	0.0	0.0	0.0	0.0	0.0	0.0	0.0	0.0	0.0	0.0	0.0	0.0	0.0	0.0	0.0	0.0
EMX2	2018	symbol	H. sapiens	2018	H. sapiens	EMX2	empty spiracles homeobox 2	GO:0021796 cerebral cortex regionalization;GO:0072197 ureter morphogenesis;GO:0021978 telencephalon regionalization		Predicted intracellular proteins; Disease related genes; Transcription factors:Helix-turn-helix domains	Nucleoplasm (Approved)				0.0	0.0	0.0	0.0	0.0	1.0	0.0	0.0	0.0	0.0	0.0	0.0	0.0	0.0	0.0	0.0	0.0	0.0	0.0	0.0
GSAP	54103	symbol	H. sapiens	54103	H. sapiens	GSAP	gamma-secretase activating protein	GO:1902004 positive regulation of amyloid-beta formation;GO:1902993 positive regulation of amyloid precursor protein catabolic process;GO:1902003 regulation of amyloid-beta formation		Predicted intracellular proteins	Vesicles (Approved)				0.0	0.0	0.0	0.0	0.0	0.0	0.0	0.0	0.0	0.0	0.0	1.0	0.0	0.0	0.0	0.0	0.0	0.0	0.0	0.0
HM13	81502	symbol	H. sapiens	81502	H. sapiens	HM13	histocompatibility minor 13	GO:0061960 regulation of heme oxygenase activity;GO:1904211 membrane protein proteolysis involved in retrograde protein transport, ER to cytosol;GO:0031293 membrane protein intracellular domain proteolysis		Peptidases:Aspartic-type peptidases; Enzymes	Endoplasmic reticulum (Supported)	Theophylline			0.0	0.0	0.0	0.0	0.0	0.0	0.0	0.0	0.0	0.0	0.0	1.0	0.0	0.0	0.0	0.0	0.0	0.0	0.0	0.0
GLTSCR1L	23506	gene_synonym	H. sapiens	23506	H. sapiens	BICRAL	BICRA like chromatin remodeling complex associated protein	GO:0045893 positive regulation of transcription, DNA-templated;GO:1903508 positive regulation of nucleic acid-templated transcription;GO:1902680 positive regulation of RNA biosynthetic process		Predicted intracellular proteins	Nucleoplasm (Supported)				0.0	0.0	0.0	0.0	0.0	0.0	0.0	0.0	0.0	0.0	0.0	0.0	0.0	0.0	0.0	0.0	0.0	0.0	0.0	0.0
IGLON5	402665	symbol	H. sapiens	402665	H. sapiens	IGLON5	IgLON family member 5			Predicted secreted proteins					0.0	0.0	0.0	0.0	0.0	0.0	0.0	0.0	0.0	0.0	0.0	0.0	0.0	0.0	0.0	0.0	0.0	0.0	0.0	0.0
HERC3	8916	symbol	H. sapiens	8916	H. sapiens	HERC3	HECT and RLD domain containing E3 ubiquitin protein ligase 3	GO:0016567 protein ubiquitination;GO:0032446 protein modification by small protein conjugation;GO:0070647 protein modification by small protein conjugation or removal		ENZYME proteins:Transferases; Predicted intracellular proteins; Enzymes	Cytosol (Approved)			(M5908)HALLMARK ANDROGEN RESPONSE	0.0	0.0	0.0	0.0	0.0	0.0	0.0	0.0	0.0	0.0	0.0	0.0	0.0	0.0	0.0	0.0	0.0	0.0	0.0	0.0
LEO1	123169	symbol	H. sapiens	123169	H. sapiens	LEO1	LEO1 homolog, Paf1/RNA polymerase II complex component	GO:0031442 positive regulation of mRNA 3'-end processing;GO:0033523 histone H2B ubiquitination;GO:0032968 positive regulation of transcription elongation from RNA polymerase II promoter		Predicted intracellular proteins	Nucleoli fibrillar center;Nucleoplasm (Enhanced); Additional: Centrosome				0.0	0.0	0.0	0.0	0.0	1.0	0.0	0.0	0.0	0.0	0.0	0.0	0.0	0.0	0.0	0.0	1.0	0.0	0.0	0.0
TXNDC12	51060	symbol	H. sapiens	51060	H. sapiens	TXNDC12	thioredoxin domain containing 12	GO:1902236 negative regulation of endoplasmic reticulum stress-induced intrinsic apoptotic signaling pathway;GO:1902235 regulation of endoplasmic reticulum stress-induced intrinsic apoptotic signaling pathway;GO:1903573 negative regulation of response to endoplasmic reticulum stress		Predicted intracellular proteins; Enzymes; ENZYME proteins:Oxidoreductases					0.0	0.0	0.0	0.0	0.0	0.0	0.0	0.0	0.0	0.0	0.0	0.0	0.0	0.0	0.0	0.0	0.0	0.0	0.0	0.0
MSTN	2660	symbol	H. sapiens	2660	H. sapiens	MSTN	myostatin	GO:0048632 negative regulation of skeletal muscle tissue growth;GO:0014839 myoblast migration involved in skeletal muscle regeneration;GO:0014859 negative regulation of skeletal muscle cell proliferation		Predicted secreted proteins; Disease related genes		MYO-029	(M5883)NABA SECRETED FACTORS; (M5885)NABA MATRISOME ASSOCIATED; (M5889)NABA MATRISOME		0.0	0.0	1.0	0.0	1.0	0.0	0.0	1.0	0.0	1.0	0.0	0.0	0.0	0.0	0.0	0.0	0.0	0.0	0.0	1.0
UBE2V2	7336	symbol	H. sapiens	7336	H. sapiens	UBE2V2	ubiquitin conjugating enzyme E2 V2	GO:0042275 error-free postreplication DNA repair;GO:0000729 DNA double-strand break processing;GO:0006301 postreplication repair		Predicted intracellular proteins	Nucleoplasm (Supported)				0.0	0.0	0.0	1.0	0.0	0.0	0.0	0.0	0.0	0.0	0.0	0.0	0.0	0.0	0.0	0.0	0.0	0.0	0.0	0.0
ABLIM3	22885	symbol	H. sapiens	22885	H. sapiens	ABLIM3	actin binding LIM protein family member 3	GO:1903955 positive regulation of protein targeting to mitochondrion;GO:1903749 positive regulation of establishment of protein localization to mitochondrion;GO:1903214 regulation of protein targeting to mitochondrion		Predicted intracellular proteins	Nucleoplasm;Plasma membrane (Approved); Additional: Cell Junctions				0.0	0.0	0.0	0.0	1.0	0.0	0.0	0.0	0.0	0.0	0.0	0.0	0.0	0.0	0.0	0.0	0.0	0.0	0.0	0.0
C3orf80	401097	symbol	H. sapiens	401097	H. sapiens	C3orf80	chromosome 3 open reading frame 80								0.0	0.0	0.0	0.0	0.0	0.0	0.0	0.0	0.0	0.0	0.0	0.0	0.0	0.0	0.0	0.0	0.0	0.0	0.0	0.0
DUSP12	11266	symbol	H. sapiens	11266	H. sapiens	DUSP12	dual specificity phosphatase 12	GO:0033133 positive regulation of glucokinase activity;GO:1903301 positive regulation of hexokinase activity;GO:0033131 regulation of glucokinase activity		Predicted intracellular proteins; ENZYME proteins:Hydrolases; Enzymes	Nucleoplasm (Supported)				0.0	0.0	0.0	0.0	0.0	0.0	0.0	0.0	0.0	0.0	1.0	0.0	0.0	0.0	0.0	0.0	0.0	0.0	0.0	0.0
FAM109B	150368	gene_synonym	H. sapiens	150368	H. sapiens	PHETA2	PH domain containing endocytic trafficking adaptor 2	GO:0001881 receptor recycling;GO:0007032 endosome organization;GO:0042147 retrograde transport, endosome to Golgi		Predicted intracellular proteins					0.0	0.0	0.0	0.0	0.0	0.0	0.0	0.0	0.0	0.0	0.0	0.0	0.0	0.0	0.0	0.0	0.0	0.0	0.0	0.0
KIAA1324L	222223	gene_synonym	H. sapiens	222223	H. sapiens	ELAPOR2	endosome-lysosome associated apoptosis and autophagy regulator family member 2	GO:0045684 positive regulation of epidermis development;GO:0030513 positive regulation of BMP signaling pathway;GO:0045682 regulation of epidermis development		Predicted intracellular proteins	Endoplasmic reticulum (Approved)				0.0	0.0	1.0	0.0	0.0	0.0	0.0	0.0	0.0	0.0	0.0	0.0	0.0	0.0	0.0	0.0	0.0	0.0	0.0	0.0
TUBD1	51174	symbol	H. sapiens	51174	H. sapiens	TUBD1	tubulin delta 1	GO:0045880 positive regulation of smoothened signaling pathway;GO:0008589 regulation of smoothened signaling pathway;GO:0007224 smoothened signaling pathway		Predicted intracellular proteins; FDA approved drug targets:Small molecule drugs	Cytosol;Nucleoplasm (Enhanced)	Vinblastine		(M5893)HALLMARK MITOTIC SPINDLE	0.0	0.0	0.0	0.0	0.0	0.0	0.0	0.0	0.0	0.0	0.0	0.0	0.0	0.0	0.0	0.0	0.0	0.0	0.0	0.0
KIF3B	9371	symbol	H. sapiens	9371	H. sapiens	KIF3B	kinesin family member 3B	GO:0036372 opsin transport;GO:0098971 anterograde dendritic transport of neurotransmitter receptor complex;GO:0072383 plus-end-directed vesicle transport along microtubule		Predicted intracellular proteins	Nucleoplasm (Uncertain); Additional: Golgi apparatus;Nucleoli			(M5893)HALLMARK MITOTIC SPINDLE	0.0	0.0	0.0	0.0	1.0	1.0	0.0	0.0	0.0	0.0	0.0	0.0	0.0	0.0	0.0	0.0	0.0	0.0	0.0	0.0
ITGA4	3676	symbol	H. sapiens	3676	H. sapiens	ITGA4	integrin subunit alpha 4	GO:0043496 regulation of protein homodimerization activity;GO:0090074 negative regulation of protein homodimerization activity;GO:1990771 clathrin-dependent extracellular exosome endocytosis		Cancer-related genes:Candidate cancer biomarkers; Predicted intracellular proteins; CD markers; FDA approved drug targets:Biotech drugs	Plasma membrane (Approved)	Natalizumab; ATL1102; CDP323; R1295; R411; Tinzaparin; Vedolizumab	(M212)PID INTEGRIN5 PATHWAY; (M274)PID LYMPH ANGIOGENESIS PATHWAY; (M47)PID INTEGRIN CS PATHWAY	(M5897)HALLMARK IL6 JAK STAT3 SIGNALING	1.0	0.0	0.0	0.0	0.0	1.0	0.0	1.0	0.0	0.0	0.0	1.0	0.0	0.0	0.0	1.0	1.0	1.0	0.0	1.0
KIAA1644	85352	gene_synonym	H. sapiens	85352	H. sapiens	SHISAL1	shisa like 1				Cytosol;Vesicles (Approved)				0.0	0.0	0.0	0.0	0.0	0.0	0.0	0.0	0.0	0.0	0.0	0.0	0.0	0.0	0.0	0.0	0.0	0.0	0.0	0.0
TAB3	257397	symbol	H. sapiens	257397	H. sapiens	TAB3	TGF-beta activated kinase 1 (MAP3K7) binding protein 3	GO:0010507 negative regulation of autophagy;GO:0043123 positive regulation of I-kappaB kinase/NF-kappaB signaling;GO:0043122 regulation of I-kappaB kinase/NF-kappaB signaling		Predicted intracellular proteins	Cytosol;Nuclear speckles (Approved)				0.0	1.0	0.0	0.0	0.0	0.0	0.0	0.0	0.0	0.0	0.0	0.0	0.0	0.0	0.0	0.0	0.0	0.0	0.0	0.0
THBS4	7060	symbol	H. sapiens	7060	H. sapiens	THBS4	thrombospondin 4	GO:0071603 endothelial cell-cell adhesion;GO:0051451 myoblast migration;GO:0048266 behavioral response to pain		Cancer-related genes:Candidate cancer biomarkers; Predicted intracellular proteins; Predicted secreted proteins	Vesicles (Approved)		(M3008)NABA ECM GLYCOPROTEINS; (M5884)NABA CORE MATRISOME; (M5889)NABA MATRISOME		1.0	0.0	0.0	1.0	0.0	0.0	0.0	1.0	0.0	0.0	0.0	0.0	0.0	1.0	0.0	0.0	0.0	0.0	0.0	0.0
PQLC2L	152078	gene_synonym	H. sapiens	152078	H. sapiens	SLC66A1L	solute carrier family 66 member 1 like	GO:1902022 L-lysine transport;GO:1903401 L-lysine transmembrane transport;GO:1903826 arginine transmembrane transport		Predicted intracellular proteins	Nuclear bodies;Nucleoplasm (Approved)				0.0	0.0	0.0	0.0	0.0	0.0	0.0	0.0	0.0	0.0	0.0	0.0	0.0	0.0	0.0	0.0	0.0	0.0	0.0	0.0
CD72	971	symbol	H. sapiens	971	H. sapiens	CD72	CD72 molecule	GO:0007155 cell adhesion;GO:0022610 biological adhesion;GO:0009987 cellular process		Predicted intracellular proteins; CD markers	Mitochondria;Nucleoplasm (Approved)		(M10)PID BCR 5PATHWAY		0.0	0.0	0.0	0.0	0.0	0.0	0.0	0.0	0.0	0.0	0.0	0.0	0.0	0.0	0.0	0.0	0.0	0.0	0.0	0.0
CLK4	57396	symbol	H. sapiens	57396	H. sapiens	CLK4	CDC like kinase 4	GO:0043484 regulation of RNA splicing;GO:0046777 protein autophosphorylation;GO:0018108 peptidyl-tyrosine phosphorylation	CMGC Ser/Thr protein kinase family	ENZYME proteins:Transferases; Predicted intracellular proteins; Kinases:CMGC Ser/Thr protein kinases; Enzymes	Actin filaments (Approved)	Fostamatinib			0.0	0.0	0.0	1.0	0.0	0.0	0.0	0.0	0.0	0.0	0.0	0.0	0.0	0.0	0.0	0.0	0.0	0.0	0.0	0.0
MILR1	284021	symbol	H. sapiens	284021	H. sapiens	MILR1	mast cell immunoglobulin like receptor 1	GO:0033004 negative regulation of mast cell activation;GO:0033003 regulation of mast cell activation;GO:0043303 mast cell degranulation		Predicted intracellular proteins					0.0	0.0	0.0	0.0	0.0	0.0	1.0	0.0	0.0	0.0	0.0	0.0	0.0	0.0	0.0	0.0	0.0	0.0	0.0	0.0
ZC2HC1A	51101	symbol	H. sapiens	51101	H. sapiens	ZC2HC1A	zinc finger C2HC-type containing 1A			Predicted intracellular proteins	Cytosol (Approved); Additional: Actin filaments				0.0	0.0	0.0	0.0	0.0	0.0	0.0	0.0	0.0	0.0	0.0	0.0	0.0	0.0	0.0	0.0	0.0	0.0	0.0	0.0
PLEKHN1	84069	symbol	H. sapiens	84069	H. sapiens	PLEKHN1	pleckstrin homology domain containing N1	GO:0061158 3'-UTR-mediated mRNA destabilization;GO:0061157 mRNA destabilization;GO:0061014 positive regulation of mRNA catabolic process		Predicted intracellular proteins	Nuclear speckles (Approved)				0.0	0.0	0.0	0.0	0.0	0.0	0.0	0.0	0.0	0.0	0.0	0.0	0.0	0.0	0.0	0.0	0.0	0.0	0.0	0.0
MOB3B	79817	symbol	H. sapiens	79817	H. sapiens	MOB3B	MOB kinase activator 3B	GO:0035330 regulation of hippo signaling;GO:0035329 hippo signaling;GO:1902531 regulation of intracellular signal transduction		Predicted intracellular proteins	Cytosol;Intermediate filaments (Uncertain)				0.0	0.0	0.0	0.0	0.0	0.0	0.0	0.0	0.0	0.0	0.0	0.0	0.0	0.0	0.0	0.0	0.0	0.0	0.0	0.0
DCDC5	341019	gene_synonym	H. sapiens	341019	H. sapiens	DCDC1	doublecortin domain containing 1	GO:1902412 regulation of mitotic cytokinesis;GO:0000281 mitotic cytokinesis;GO:0032465 regulation of cytokinesis		Cancer-related genes:Candidate cancer biomarkers; Predicted intracellular proteins					0.0	0.0	0.0	0.0	0.0	0.0	0.0	0.0	0.0	0.0	0.0	0.0	0.0	0.0	0.0	0.0	0.0	0.0	0.0	0.0
MIS18BP1	55320	symbol	H. sapiens	55320	H. sapiens	MIS18BP1	MIS18 binding protein 1	GO:0051301 cell division;GO:0007049 cell cycle;GO:0009987 cellular process		Predicted intracellular proteins	Nucleoli (Approved); Additional: Cytosol				0.0	0.0	0.0	0.0	0.0	0.0	0.0	0.0	0.0	0.0	0.0	0.0	0.0	0.0	0.0	0.0	0.0	0.0	0.0	0.0
LINC01119	100134259	symbol	H. sapiens	100134259	H. sapiens	LINC01119	long intergenic non-protein coding RNA 1119								0.0	0.0	0.0	0.0	0.0	0.0	0.0	0.0	0.0	0.0	0.0	0.0	0.0	0.0	0.0	0.0	0.0	0.0	0.0	0.0
C1QTNF3	114899	symbol	H. sapiens	114899	H. sapiens	C1QTNF3	C1q and TNF related 3	GO:0070165 positive regulation of adiponectin secretion;GO:0071638 negative regulation of monocyte chemotactic protein-1 production;GO:0070162 adiponectin secretion		Predicted secreted proteins	Golgi apparatus (Approved)		(M5880)NABA ECM AFFILIATED; (M5885)NABA MATRISOME ASSOCIATED; (M5889)NABA MATRISOME		0.0	0.0	0.0	0.0	0.0	0.0	0.0	0.0	1.0	1.0	1.0	0.0	0.0	0.0	0.0	0.0	0.0	0.0	0.0	0.0
GNG2	54331	symbol	H. sapiens	54331	H. sapiens	GNG2	G protein subunit gamma 2	GO:0007191 adenylate cyclase-activating dopamine receptor signaling pathway;GO:0071380 cellular response to prostaglandin E stimulus;GO:0071379 cellular response to prostaglandin stimulus		Predicted intracellular proteins; RAS pathway related proteins	Plasma membrane (Approved); Additional: Vesicles	Halothane	(M138)PID THROMBIN PAR4 PATHWAY; (M252)PID IL8 CXCR1 PATHWAY; (M213)PID AR NONGENOMIC PATHWAY	(M5921)HALLMARK COMPLEMENT	0.0	0.0	0.0	0.0	0.0	0.0	0.0	0.0	0.0	0.0	0.0	0.0	0.0	0.0	0.0	0.0	0.0	0.0	0.0	1.0
CCDC82	79780	symbol	H. sapiens	79780	H. sapiens	CCDC82	coiled-coil domain containing 82			Predicted intracellular proteins	Nucleoplasm (Approved); Additional: Cytosol;Nuclear bodies				0.0	0.0	0.0	0.0	0.0	0.0	0.0	0.0	0.0	0.0	0.0	0.0	0.0	0.0	0.0	0.0	0.0	0.0	0.0	0.0
COL21A1	81578	symbol	H. sapiens	81578	H. sapiens	COL21A1	collagen type XXI alpha 1 chain			Predicted intracellular proteins; Predicted secreted proteins	Cytosol (Supported)		(M3005)NABA COLLAGENS; (M5884)NABA CORE MATRISOME; (M5889)NABA MATRISOME		1.0	0.0	0.0	0.0	0.0	0.0	0.0	0.0	0.0	0.0	0.0	0.0	0.0	0.0	0.0	0.0	0.0	0.0	0.0	0.0
RFX8	731220	symbol	H. sapiens	731220	H. sapiens	RFX8	regulatory factor X8	GO:0006357 regulation of transcription by RNA polymerase II;GO:0006366 transcription by RNA polymerase II;GO:0006355 regulation of transcription, DNA-templated		Predicted intracellular proteins; Transcription factors:Helix-turn-helix domains	Nucleoplasm (Approved); Additional: Nuclear bodies				0.0	0.0	0.0	0.0	0.0	0.0	0.0	0.0	0.0	0.0	0.0	0.0	0.0	0.0	0.0	0.0	0.0	0.0	0.0	0.0
PDE4C	5143	symbol	H. sapiens	5143	H. sapiens	PDE4C	phosphodiesterase 4C	GO:0006198 cAMP catabolic process;GO:0009214 cyclic nucleotide catabolic process;GO:0046058 cAMP metabolic process		Predicted intracellular proteins; FDA approved drug targets:Small molecule drugs; ENZYME proteins:Hydrolases; Enzymes	Centrosome;Cytosol (Approved); Additional: Midbody ring	Dyphylline; Iloprost; Roflumilast; Piclamilast; Crisaborole; Ibudilast; Exisulind			0.0	0.0	0.0	0.0	0.0	0.0	0.0	0.0	0.0	0.0	0.0	0.0	0.0	0.0	0.0	0.0	0.0	0.0	0.0	0.0
MAOA	4128	symbol	H. sapiens	4128	H. sapiens	MAOA	monoamine oxidase A	GO:0042420 dopamine catabolic process;GO:0042135 neurotransmitter catabolic process;GO:0019614 catechol-containing compound catabolic process		FDA approved drug targets:Small molecule drugs; Enzymes; ENZYME proteins:Oxidoreductases; Disease related genes	Mitochondria (Enhanced); Additional: Cytosol	Amphetamine; Phentermine; Procaine; Tranylcypromine; Phenelzine; Minaprine; Zonisamide; Selegiline; Procarbazine; Moclobemide; Isocarboxazid; Ephedra sinica root; MMDA; 4-Methoxyamphetamine; Metamfetamine; Pargyline; Flavin adenine dinucleotide; Clorgiline; Nialamide; Nomifensine; Zimelidine; Posizolid; CX157; Decyl(dimethyl)phosphine oxide; Harmine; Pirlindole; Toloxatone; Brofaromine; Flortauci…		(M5935)HALLMARK FATTY ACID METABOLISM; (M5941)HALLMARK UV RESPONSE UP; (M5934)HALLMARK XENOBIOTIC METABOLISM	0.0	1.0	0.0	0.0	0.0	0.0	0.0	0.0	1.0	0.0	0.0	0.0	0.0	0.0	0.0	0.0	0.0	0.0	1.0	0.0
CLIC2	1193	symbol	H. sapiens	1193	H. sapiens	CLIC2	chloride intracellular channel 2	GO:0060315 negative regulation of ryanodine-sensitive calcium-release channel activity;GO:0051280 negative regulation of release of sequestered calcium ion into cytosol;GO:0051284 positive regulation of sequestering of calcium ion		Transporters:Transporter channels and pores; Predicted intracellular proteins; Potential drug targets; Disease related genes	Cytosol;Plasma membrane (Supported); Additional: Nucleoplasm			(M5945)HALLMARK HEME METABOLISM	0.0	0.0	0.0	0.0	0.0	0.0	0.0	0.0	0.0	0.0	0.0	0.0	0.0	0.0	1.0	0.0	0.0	0.0	0.0	0.0
LAPTM5	7805	symbol	H. sapiens	7805	H. sapiens	LAPTM5	lysosomal protein transmembrane 5	GO:0012502 induction of programmed cell death;GO:0097214 positive regulation of lysosomal membrane permeability;GO:1904093 negative regulation of autophagic cell death		Transporters:Electrochemical Potential-driven transporters	Cytosol (Approved)			(M5953)HALLMARK KRAS SIGNALING UP	0.0	0.0	0.0	0.0	0.0	0.0	1.0	0.0	0.0	0.0	1.0	0.0	1.0	0.0	0.0	0.0	0.0	0.0	0.0	0.0
CDA	978	symbol	H. sapiens	978	H. sapiens	CDA	cytidine deaminase	GO:0019858 cytosine metabolic process;GO:0008655 pyrimidine-containing compound salvage;GO:0006216 cytidine catabolic process		Predicted intracellular proteins; ENZYME proteins:Hydrolases; Enzymes	Nucleoplasm (Approved)	1-Beta-Ribofuranosyl-1,3-Diazepinone		(M5898)HALLMARK DNA REPAIR; (M5921)HALLMARK COMPLEMENT; (M5934)HALLMARK XENOBIOTIC METABOLISM	0.0	0.0	0.0	0.0	0.0	0.0	0.0	0.0	0.0	0.0	1.0	0.0	0.0	0.0	0.0	0.0	0.0	0.0	0.0	0.0
P4HA3	283208	symbol	H. sapiens	283208	H. sapiens	P4HA3	prolyl 4-hydroxylase subunit alpha 3	GO:0018401 peptidyl-proline hydroxylation to 4-hydroxy-L-proline;GO:0019511 peptidyl-proline hydroxylation;GO:0018126 protein hydroxylation		Predicted intracellular proteins; Enzymes; ENZYME proteins:Oxidoreductases			(M3468)NABA ECM REGULATORS; (M5885)NABA MATRISOME ASSOCIATED; (M5889)NABA MATRISOME		1.0	0.0	0.0	0.0	0.0	0.0	0.0	0.0	0.0	1.0	0.0	0.0	0.0	0.0	0.0	0.0	0.0	0.0	0.0	0.0
SLC9B2	133308	symbol	H. sapiens	133308	H. sapiens	SLC9B2	solute carrier family 9 member B2	GO:2001206 positive regulation of osteoclast development;GO:2001204 regulation of osteoclast development;GO:0036035 osteoclast development		Transporters:Electrochemical Potential-driven transporters	Cell Junctions;Nucleoplasm (Approved)				0.0	0.0	0.0	0.0	0.0	0.0	0.0	0.0	0.0	0.0	1.0	0.0	0.0	0.0	1.0	0.0	0.0	0.0	0.0	0.0
CD58	965	symbol	H. sapiens	965	H. sapiens	CD58	CD58 molecule	GO:0034113 heterotypic cell-cell adhesion;GO:0032757 positive regulation of interleukin-8 production;GO:0032677 regulation of interleukin-8 production		CD markers					0.0	0.0	0.0	0.0	0.0	0.0	0.0	0.0	0.0	0.0	0.0	0.0	0.0	0.0	0.0	0.0	0.0	0.0	0.0	0.0
AP3S1	1176	symbol	H. sapiens	1176	H. sapiens	AP3S1	adaptor related protein complex 3 subunit sigma 1	GO:0048490 anterograde synaptic vesicle transport;GO:0099514 synaptic vesicle cytoskeletal transport;GO:0099517 synaptic vesicle transport along microtubule		Predicted intracellular proteins	Vesicles (Approved)			(M5910)HALLMARK PROTEIN SECRETION; (M5926)HALLMARK MYC TARGETS V1	0.0	0.0	0.0	0.0	0.0	0.0	0.0	0.0	0.0	0.0	0.0	0.0	0.0	0.0	0.0	0.0	0.0	0.0	0.0	1.0
P2RY1	5028	symbol	H. sapiens	5028	H. sapiens	P2RY1	purinergic receptor P2Y1	GO:0060406 positive regulation of penile erection;GO:0032962 positive regulation of inositol trisphosphate biosynthetic process;GO:0032960 regulation of inositol trisphosphate biosynthetic process		G-protein coupled receptors:Adenosine and adenine nucleotide receptors; Transporters; G-protein coupled receptors:GPCRs excl olfactory receptors				(M5946)HALLMARK COAGULATION	0.0	0.0	1.0	0.0	0.0	0.0	0.0	0.0	1.0	0.0	1.0	0.0	0.0	0.0	1.0	0.0	0.0	0.0	0.0	1.0
IL7	3574	symbol	H. sapiens	3574	H. sapiens	IL7	interleukin 7	GO:0045579 positive regulation of B cell differentiation;GO:0048873 homeostasis of number of cells within a tissue;GO:0002360 T cell lineage commitment		Cancer-related genes:Candidate cancer biomarkers; Predicted secreted proteins			(M5883)NABA SECRETED FACTORS; (M5885)NABA MATRISOME ASSOCIATED; (M5889)NABA MATRISOME	(M5897)HALLMARK IL6 JAK STAT3 SIGNALING; (M5911)HALLMARK INTERFERON ALPHA RESPONSE; (M5913)HALLMARK INTERFERON GAMMA RESPONSE	0.0	1.0	0.0	1.0	0.0	0.0	1.0	0.0	0.0	1.0	1.0	0.0	0.0	0.0	0.0	0.0	0.0	0.0	0.0	0.0
LOC285043	285043	Gene_ID	H. sapiens	285043	H. sapiens	LINC01936	long intergenic non-protein coding RNA 1936								0.0	0.0	0.0	0.0	0.0	0.0	0.0	0.0	0.0	0.0	0.0	0.0	0.0	0.0	0.0	0.0	0.0	0.0	0.0	0.0
TMBIM6	7009	symbol	H. sapiens	7009	H. sapiens	TMBIM6	transmembrane BAX inhibitor motif containing 6	GO:0060701 negative regulation of ribonuclease activity;GO:0060702 negative regulation of endoribonuclease activity;GO:0060699 regulation of endoribonuclease activity		Transporters:Transporter channels and pores; Predicted intracellular proteins				(M5941)HALLMARK UV RESPONSE UP; (M5934)HALLMARK XENOBIOTIC METABOLISM	0.0	0.0	0.0	0.0	0.0	0.0	1.0	0.0	0.0	0.0	0.0	0.0	0.0	0.0	1.0	0.0	0.0	0.0	0.0	0.0
NCOA4	8031	symbol	H. sapiens	8031	H. sapiens	NCOA4	nuclear receptor coactivator 4	GO:0071394 cellular response to testosterone stimulus;GO:0071391 cellular response to estrogen stimulus;GO:0006622 protein targeting to lysosome		Cancer-related genes:Mutational cancer driver genes; Disease related genes; Predicted intracellular proteins	Nucleoli (Approved); Additional: Cytosol;Golgi apparatus		(M58)PID AR PATHWAY	(M5908)HALLMARK ANDROGEN RESPONSE; (M5945)HALLMARK HEME METABOLISM	0.0	0.0	0.0	0.0	0.0	0.0	0.0	0.0	0.0	0.0	0.0	0.0	0.0	0.0	1.0	0.0	0.0	0.0	0.0	1.0
LRRC15	131578	symbol	H. sapiens	131578	H. sapiens	LRRC15	leucine rich repeat containing 15	GO:0046813 receptor-mediated virion attachment to host cell;GO:0019062 virion attachment to host cell;GO:0044650 adhesion of symbiont to host cell			Vesicles (Approved); Additional: Plasma membrane			(M5930)HALLMARK EPITHELIAL MESENCHYMAL TRANSITION	0.0	0.0	0.0	0.0	0.0	0.0	0.0	1.0	0.0	0.0	0.0	0.0	0.0	0.0	0.0	0.0	0.0	0.0	0.0	0.0
CACNA2D4	93589	symbol	H. sapiens	93589	H. sapiens	CACNA2D4	calcium voltage-gated channel auxiliary subunit alpha2delta 4	GO:0050908 detection of light stimulus involved in visual perception;GO:0050962 detection of light stimulus involved in sensory perception;GO:0009584 detection of visible light		Predicted intracellular proteins; Disease related genes					0.0	0.0	0.0	0.0	0.0	0.0	0.0	0.0	0.0	0.0	0.0	0.0	0.0	0.0	1.0	0.0	0.0	1.0	0.0	0.0
IGF1	3479	symbol	H. sapiens	3479	H. sapiens	IGF1	insulin like growth factor 1	GO:0060283 negative regulation of oocyte development;GO:1904073 regulation of trophectodermal cell proliferation;GO:1904075 positive regulation of trophectodermal cell proliferation		Predicted secreted proteins; Disease related genes; RAS pathway related proteins		N,N-Bis(3-(D-gluconamido)propyl)deoxycholamide; N-Dodecyl-N,N-Dimethyl-3-Ammonio-1-Propanesulfonate	(M295)SIG PIP3 SIGNALING IN CARDIAC MYOCTES; (M5883)NABA SECRETED FACTORS; (M5885)NABA MATRISOME ASSOCIATED	(M5909)HALLMARK MYOGENESIS; (M5934)HALLMARK XENOBIOTIC METABOLISM	0.0	0.0	0.0	1.0	0.0	0.0	1.0	1.0	1.0	1.0	1.0	1.0	0.0	0.0	0.0	0.0	0.0	1.0	0.0	1.0
EYA1	2138	symbol	H. sapiens	2138	H. sapiens	EYA1	EYA transcriptional coactivator and phosphatase 1	GO:0072513 positive regulation of secondary heart field cardioblast proliferation;GO:0048752 semicircular canal morphogenesis;GO:0016576 histone dephosphorylation		Predicted intracellular proteins; ENZYME proteins:Hydrolases; Enzymes; Disease related genes; Potential drug targets	Nuclear bodies;Nucleoplasm (Supported)				0.0	0.0	0.0	0.0	0.0	1.0	0.0	0.0	0.0	0.0	1.0	0.0	0.0	0.0	0.0	0.0	1.0	0.0	0.0	0.0
LRRC6	23639	gene_synonym	H. sapiens	23639	H. sapiens	DNAAF11	dynein axonemal assembly factor 11	GO:0120229 protein localization to motile cilium;GO:0090660 cerebrospinal fluid circulation;GO:0060287 epithelial cilium movement involved in determination of left/right asymmetry		Predicted intracellular proteins; Disease related genes					0.0	0.0	0.0	0.0	1.0	1.0	0.0	0.0	0.0	0.0	0.0	0.0	0.0	0.0	0.0	0.0	0.0	0.0	0.0	0.0
TGFBI	7045	symbol	H. sapiens	7045	H. sapiens	TGFBI	transforming growth factor beta induced	GO:0002062 chondrocyte differentiation;GO:0051216 cartilage development;GO:0007601 visual perception		Predicted intracellular proteins; Predicted secreted proteins; Disease related genes			(M169)PID INTEGRIN2 PATHWAY; (M53)PID INTEGRIN3 PATHWAY; (M18)PID INTEGRIN1 PATHWAY	(M5891)HALLMARK HYPOXIA; (M5915)HALLMARK APICAL JUNCTION; (M5930)HALLMARK EPITHELIAL MESENCHYMAL TRANSITION	1.0	0.0	0.0	0.0	0.0	0.0	0.0	0.0	0.0	0.0	1.0	0.0	0.0	0.0	0.0	0.0	0.0	0.0	0.0	0.0
WDFY4	57705	symbol	H. sapiens	57705	H. sapiens	WDFY4	WDFY family member 4	GO:0036037 CD8-positive, alpha-beta T cell activation;GO:0098586 cellular response to virus;GO:0019882 antigen processing and presentation		Predicted intracellular proteins	Nucleoplasm (Approved); Additional: Cytosol				0.0	0.0	0.0	0.0	0.0	0.0	0.0	0.0	0.0	0.0	0.0	0.0	0.0	0.0	0.0	0.0	0.0	0.0	0.0	0.0
RBM47	54502	symbol	H. sapiens	54502	H. sapiens	RBM47	RNA binding motif protein 47	GO:0016554 cytidine to uridine editing;GO:0016553 base conversion or substitution editing;GO:0002244 hematopoietic progenitor cell differentiation		Predicted intracellular proteins	Cytosol;Nucleoplasm (Approved)				0.0	0.0	0.0	0.0	0.0	0.0	0.0	0.0	0.0	0.0	0.0	0.0	0.0	0.0	0.0	0.0	0.0	0.0	0.0	0.0
TRIM29	23650	symbol	H. sapiens	23650	H. sapiens	TRIM29	tripartite motif containing 29	GO:1900181 negative regulation of protein localization to nucleus;GO:1903828 negative regulation of cellular protein localization;GO:1900180 regulation of protein localization to nucleus		Predicted intracellular proteins	Intermediate filaments (Approved); Additional: Cytosol;Nucleoplasm			(M5907)HALLMARK ESTROGEN RESPONSE LATE	0.0	1.0	0.0	0.0	0.0	0.0	0.0	0.0	0.0	0.0	0.0	0.0	0.0	0.0	0.0	0.0	0.0	0.0	0.0	0.0
NEO1	4756	symbol	H. sapiens	4756	H. sapiens	NEO1	neogenin 1	GO:0030513 positive regulation of BMP signaling pathway;GO:0055072 iron ion homeostasis;GO:0030510 regulation of BMP signaling pathway		Cancer-related genes:Candidate cancer biomarkers	Nucleoplasm;Plasma membrane (Approved); Additional: Golgi apparatus				0.0	0.0	1.0	0.0	0.0	0.0	0.0	1.0	0.0	0.0	0.0	0.0	0.0	0.0	1.0	0.0	0.0	0.0	0.0	0.0
CLEC2B	9976	symbol	H. sapiens	9976	H. sapiens	CLEC2B	C-type lectin domain family 2 member B			Predicted intracellular proteins			(M5880)NABA ECM AFFILIATED; (M5885)NABA MATRISOME ASSOCIATED; (M5889)NABA MATRISOME		0.0	0.0	0.0	0.0	0.0	0.0	0.0	0.0	0.0	1.0	0.0	0.0	0.0	0.0	0.0	0.0	0.0	0.0	0.0	0.0
DOK6	220164	symbol	H. sapiens	220164	H. sapiens	DOK6	docking protein 6	GO:0043410 positive regulation of MAPK cascade;GO:0007169 transmembrane receptor protein tyrosine kinase signaling pathway;GO:0043408 regulation of MAPK cascade		Predicted intracellular proteins	Cytosol;Focal adhesion sites (Approved)		(M82)PID RET PATHWAY		0.0	0.0	0.0	0.0	0.0	0.0	0.0	0.0	0.0	0.0	1.0	0.0	0.0	0.0	0.0	0.0	0.0	0.0	0.0	0.0
MTURN	222166	symbol	H. sapiens	222166	H. sapiens	MTURN	maturin, neural progenitor differentiation regulator homolog	GO:0045654 positive regulation of megakaryocyte differentiation;GO:0045652 regulation of megakaryocyte differentiation;GO:0030219 megakaryocyte differentiation		Predicted intracellular proteins	Cytosol (Approved)				0.0	0.0	0.0	0.0	0.0	0.0	0.0	0.0	0.0	0.0	1.0	0.0	0.0	0.0	0.0	0.0	0.0	0.0	0.0	0.0
SYN3	8224	symbol	H. sapiens	8224	H. sapiens	SYN3	synapsin III	GO:0097091 synaptic vesicle clustering;GO:0032228 regulation of synaptic transmission, GABAergic;GO:0051932 synaptic transmission, GABAergic		Predicted intracellular proteins					0.0	0.0	0.0	0.0	0.0	0.0	0.0	0.0	0.0	0.0	0.0	0.0	0.0	0.0	0.0	0.0	0.0	0.0	0.0	0.0
EHHADH	1962	symbol	H. sapiens	1962	H. sapiens	EHHADH	enoyl-CoA hydratase and 3-hydroxyacyl CoA dehydrogenase	GO:0033540 fatty acid beta-oxidation using acyl-CoA oxidase;GO:0006635 fatty acid beta-oxidation;GO:0009062 fatty acid catabolic process		ENZYME proteins:Lyases; ENZYME proteins:Isomerase; Predicted intracellular proteins; Enzymes; ENZYME proteins:Oxidoreductases; Disease related genes; Potential drug targets		NADH		(M5949)HALLMARK PEROXISOME; (M5935)HALLMARK FATTY ACID METABOLISM	0.0	0.0	0.0	0.0	0.0	0.0	0.0	0.0	1.0	0.0	0.0	0.0	0.0	0.0	0.0	0.0	0.0	0.0	0.0	0.0
HOXC8	3224	symbol	H. sapiens	3224	H. sapiens	HOXC8	homeobox C8	GO:0006357 regulation of transcription by RNA polymerase II;GO:0006366 transcription by RNA polymerase II;GO:0006355 regulation of transcription, DNA-templated		Predicted intracellular proteins; Transcription factors:Helix-turn-helix domains	Nucleoplasm (Supported); Additional: Microtubules				0.0	0.0	0.0	0.0	0.0	0.0	0.0	0.0	0.0	0.0	0.0	0.0	0.0	0.0	0.0	0.0	0.0	0.0	0.0	0.0
PGR	5241	symbol	H. sapiens	5241	H. sapiens	PGR	progesterone receptor	GO:0060748 tertiary branching involved in mammary gland duct morphogenesis;GO:0001542 ovulation from ovarian follicle;GO:0060745 mammary gland branching involved in pregnancy		Cancer-related genes:Candidate cancer biomarkers; Transcription factors:Zinc-coordinating DNA-binding domains; Predicted intracellular proteins; FDA approved drug targets:Small molecule drugs; Nuclear receptors		Etonogestrel; Desogestrel; Megestrol acetate; Levonorgestrel; Dydrogesterone; Progesterone; Spironolactone; Lindane; Fluticasone propionate; Medroxyprogesterone acetate; Mitotane; Norethisterone; Mometasone; Ethynodiol diacetate; Mifepristone; Norgestimate; Drospirenone; Danazol; Oxybenzone; Allylestrenol; Phthalic Acid; Metribolone; Tanaproget; Telapristone acetate; Asoprisnil; Norelgestromin; G…	(M267)PID ANTHRAX PATHWAY; (M200)PID ERA GENOMIC PATHWAY	(M5906)HALLMARK ESTROGEN RESPONSE EARLY; (M5907)HALLMARK ESTROGEN RESPONSE LATE	0.0	0.0	0.0	0.0	0.0	0.0	0.0	0.0	0.0	0.0	0.0	0.0	0.0	0.0	0.0	0.0	0.0	0.0	0.0	1.0
ZMIZ1-AS1	283050	symbol	H. sapiens	283050	H. sapiens	ZMIZ1-AS1	ZMIZ1 antisense RNA 1								0.0	0.0	0.0	0.0	0.0	0.0	0.0	0.0	0.0	0.0	0.0	0.0	0.0	0.0	0.0	0.0	0.0	0.0	0.0	0.0
ZNF331	55422	symbol	H. sapiens	55422	H. sapiens	ZNF331	zinc finger protein 331	GO:0006357 regulation of transcription by RNA polymerase II;GO:0006366 transcription by RNA polymerase II;GO:0006355 regulation of transcription, DNA-templated		Transcription factors:Zinc-coordinating DNA-binding domains; Cancer-related genes; Predicted intracellular proteins	Nucleoplasm (Approved)				0.0	0.0	0.0	0.0	0.0	0.0	0.0	0.0	0.0	0.0	0.0	0.0	0.0	0.0	0.0	0.0	0.0	0.0	0.0	0.0
ISLR	3671	symbol	H. sapiens	3671	H. sapiens	ISLR	immunoglobulin superfamily containing leucine rich repeat	GO:0007155 cell adhesion;GO:0022610 biological adhesion;GO:0009987 cellular process		Predicted secreted proteins	Plasma membrane (Approved); Additional: Golgi apparatus				0.0	0.0	0.0	0.0	0.0	0.0	0.0	0.0	0.0	0.0	0.0	0.0	0.0	0.0	0.0	0.0	0.0	0.0	0.0	0.0
PPAP2A	8611	gene_synonym	H. sapiens	8611	H. sapiens	PLPP1	phospholipid phosphatase 1	GO:0006670 sphingosine metabolic process;GO:0046519 sphingoid metabolic process;GO:0007205 protein kinase C-activating G protein-coupled receptor signaling pathway		ENZYME proteins:Hydrolases; Enzymes	Plasma membrane (Supported)		(M7)PID FCER1 PATHWAY; (M19)PID P73PATHWAY	(M5908)HALLMARK ANDROGEN RESPONSE; (M5947)HALLMARK IL2 STAT5 SIGNALING	0.0	0.0	0.0	0.0	0.0	0.0	0.0	0.0	1.0	0.0	0.0	0.0	0.0	0.0	0.0	0.0	0.0	0.0	0.0	1.0
TMBIM4	51643	symbol	H. sapiens	51643	H. sapiens	TMBIM4	transmembrane BAX inhibitor motif containing 4	GO:0050848 regulation of calcium-mediated signaling;GO:0019722 calcium-mediated signaling;GO:0019932 second-messenger-mediated signaling		Transporters:Transporter channels and pores; Predicted intracellular proteins	Golgi apparatus (Supported)				0.0	0.0	0.0	0.0	0.0	0.0	0.0	0.0	0.0	0.0	0.0	0.0	0.0	0.0	0.0	0.0	0.0	0.0	0.0	0.0
C3orf67	200844	gene_synonym	H. sapiens	200844	H. sapiens	CFAP20DC	CFAP20 domain containing			Predicted intracellular proteins	Golgi apparatus (Approved)				0.0	0.0	0.0	0.0	0.0	0.0	0.0	0.0	0.0	0.0	0.0	0.0	0.0	0.0	0.0	0.0	0.0	0.0	0.0	0.0
SPTLC1	10558	symbol	H. sapiens	10558	H. sapiens	SPTLC1	serine palmitoyltransferase long chain base subunit 1	GO:1904606 fat cell apoptotic process;GO:1904649 regulation of fat cell apoptotic process;GO:1904502 regulation of lipophagy		ENZYME proteins:Transferases; Potential drug targets; Enzymes; Disease related genes	Endoplasmic reticulum (Supported)	Pyridoxal phosphate; Serine			0.0	0.0	0.0	0.0	0.0	0.0	0.0	0.0	1.0	0.0	0.0	0.0	0.0	0.0	0.0	0.0	0.0	0.0	0.0	0.0
TSPAN11	441631	symbol	H. sapiens	441631	H. sapiens	TSPAN11	tetraspanin 11	GO:0016477 cell migration;GO:0048870 cell motility;GO:0051674 localization of cell			Vesicles (Approved)				0.0	0.0	0.0	0.0	0.0	0.0	0.0	0.0	0.0	0.0	0.0	0.0	0.0	0.0	0.0	0.0	0.0	0.0	0.0	0.0
CNTN3	5067	symbol	H. sapiens	5067	H. sapiens	CNTN3	contactin 3	GO:0007155 cell adhesion;GO:0022610 biological adhesion;GO:0007399 nervous system development		Predicted intracellular proteins					0.0	0.0	0.0	0.0	0.0	0.0	0.0	0.0	0.0	0.0	0.0	0.0	0.0	0.0	0.0	0.0	0.0	0.0	0.0	0.0
FKBP1A	2280	symbol	H. sapiens	2280	H. sapiens	FKBP1A	FKBP prolyl isomerase 1A	GO:0022417 protein maturation by protein folding;GO:0060315 negative regulation of ryanodine-sensitive calcium-release channel activity;GO:0007183 SMAD protein complex assembly		ENZYME proteins:Isomerase; Transporters:Accessory Factors Involved in Transport; Predicted intracellular proteins; FDA approved drug targets:Small molecule drugs; Enzymes		Pimecrolimus; Tacrolimus; Sirolimus; (3R)-4-(p-toluenesulfonyl)-1,4-thiazane-3-carboxylicacid-L-phenylalanine ethyl ester; {3-[3-(3,4-Dimethoxy-Phenyl)-1-(1-{1-[2-(3,4,5-Trimethoxy-Phenyl)-Butyryl]-Piperidin-2yl}-Vinyloxy)-Propyl]-Phenoxy}-Acetic Acid; Gpi-1046; Methyl Methylsulfinylmethyl Sulfide; FKB-001; Heptyl glucoside; L-709,587; (3r)-4-(P-Toluenesulfonyl)-1,4-Thiazane-3-Carboxylicacid-L-Le…	(M203)PID ALK2 PATHWAY; (M185)PID ALK1 PATHWAY; (M235)PID TCR CALCIUM PATHWAY	(M5896)HALLMARK TGF BETA SIGNALING	1.0	0.0	1.0	0.0	0.0	0.0	0.0	0.0	0.0	0.0	0.0	1.0	0.0	0.0	1.0	1.0	0.0	0.0	0.0	0.0
CEP162	22832	symbol	H. sapiens	22832	H. sapiens	CEP162	centrosomal protein 162	GO:0060271 cilium assembly;GO:0044782 cilium organization;GO:0120031 plasma membrane bounded cell projection assembly		Predicted intracellular proteins	Cytosol;Plasma membrane (Enhanced); Additional: Nucleoplasm				0.0	0.0	0.0	0.0	1.0	0.0	0.0	0.0	0.0	0.0	0.0	0.0	0.0	0.0	0.0	0.0	0.0	0.0	0.0	0.0
THOC2	57187	symbol	H. sapiens	57187	H. sapiens	THOC2	THO complex 2	GO:0046784 viral mRNA export from host cell nucleus;GO:0044417 translocation of molecules into host;GO:0016973 poly(A)+ mRNA export from nucleus		Predicted intracellular proteins; Disease related genes	Nucleoplasm (Approved)				0.0	0.0	0.0	1.0	0.0	0.0	0.0	0.0	0.0	0.0	0.0	0.0	0.0	0.0	0.0	0.0	0.0	0.0	0.0	0.0
CTAGE5	4253	gene_synonym	H. sapiens	4253	H. sapiens	MIA2	MIA SH3 domain ER export factor 2	GO:0035459 vesicle cargo loading;GO:0006888 endoplasmic reticulum to Golgi vesicle-mediated transport;GO:0048193 Golgi vesicle transport		Predicted intracellular proteins; Disease related genes	Endoplasmic reticulum (Supported)				0.0	0.0	0.0	0.0	0.0	0.0	0.0	0.0	0.0	0.0	0.0	0.0	0.0	0.0	0.0	0.0	0.0	0.0	0.0	0.0
PARP3	10039	symbol	H. sapiens	10039	H. sapiens	PARP3	poly(ADP-ribose) polymerase family member 3	GO:1905662 negative regulation of telomerase RNA reverse transcriptase activity;GO:0030592 DNA ADP-ribosylation;GO:1905661 regulation of telomerase RNA reverse transcriptase activity		ENZYME proteins:Transferases; Predicted intracellular proteins; FDA approved drug targets:Small molecule drugs; Enzymes	Nuclear bodies;Nucleoplasm (Supported)	2-methyl-3,5,7,8-tetrahydro-4H-thiopyrano[4,3-d]pyrimidin-4-one; 4-[3-(1,4-diazepan-1-ylcarbonyl)-4-fluorobenzyl]phthalazin-1(2H)-one; N~2~,N~2~-DIMETHYL-N~1~-(6-OXO-5,6-DIHYDROPHENANTHRIDIN-2-YL)GLYCINAMIDE; Olaparib; Rucaparib			0.0	0.0	0.0	0.0	0.0	0.0	1.0	0.0	0.0	0.0	0.0	0.0	0.0	0.0	0.0	0.0	0.0	0.0	0.0	0.0
NIPAL2	79815	symbol	H. sapiens	79815	H. sapiens	NIPAL2	NIPA like domain containing 2	GO:1903830 magnesium ion transmembrane transport;GO:0015693 magnesium ion transport;GO:0098662 inorganic cation transmembrane transport							0.0	0.0	0.0	0.0	0.0	0.0	0.0	0.0	0.0	0.0	0.0	0.0	0.0	0.0	1.0	0.0	0.0	0.0	0.0	0.0
PMP22	5376	symbol	H. sapiens	5376	H. sapiens	PMP22	peripheral myelin protein 22	GO:0032060 bleb assembly;GO:0032288 myelin assembly;GO:0007422 peripheral nervous system development		Cancer-related genes:Candidate cancer biomarkers; Predicted intracellular proteins; Disease related genes; Transporters:Transporter channels and pores; Potential drug targets			(M239)PID A6B1 A6B4 INTEGRIN PATHWAY	(M5942)HALLMARK UV RESPONSE DN; (M5930)HALLMARK EPITHELIAL MESENCHYMAL TRANSITION	0.0	0.0	0.0	1.0	1.0	0.0	0.0	0.0	0.0	0.0	0.0	0.0	0.0	0.0	0.0	0.0	0.0	0.0	0.0	0.0
CLDN7	1366	symbol	H. sapiens	1366	H. sapiens	CLDN7	claudin 7	GO:0016338 calcium-independent cell-cell adhesion via plasma membrane cell-adhesion molecules;GO:0070830 bicellular tight junction assembly;GO:0120192 tight junction assembly		Cancer-related genes:Candidate cancer biomarkers; Predicted intracellular proteins; Transporters:Transporter channels and pores	Vesicles (Approved); Additional: Cell Junctions			(M5906)HALLMARK ESTROGEN RESPONSE EARLY; (M5915)HALLMARK APICAL JUNCTION	0.0	0.0	0.0	0.0	0.0	0.0	0.0	0.0	0.0	0.0	0.0	0.0	0.0	0.0	0.0	0.0	0.0	0.0	0.0	0.0
ADAM10	102	symbol	H. sapiens	102	H. sapiens	ADAM10	ADAM metallopeptidase domain 10	GO:0051089 constitutive protein ectodomain proteolysis;GO:0097327 response to antineoplastic agent;GO:0098696 regulation of neurotransmitter receptor localization to postsynaptic specialization membrane		CD markers; Transporters:Accessory Factors Involved in Transport; Predicted intracellular proteins; ENZYME proteins:Hydrolases; Enzymes; Disease related genes; Cancer-related genes:Mutational cancer driver genes; Potential drug targets	Plasma membrane (Supported); Additional: Nucleoplasm;Vesicles	XL784	(M70)PID PS1 PATHWAY; (M142)PID AJDISS 2PATHWAY; (M17)PID NOTCH PATHWAY	(M5916)HALLMARK APICAL SURFACE; (M5910)HALLMARK PROTEIN SECRETION	1.0	0.0	0.0	1.0	0.0	1.0	0.0	1.0	0.0	1.0	1.0	1.0	0.0	0.0	0.0	0.0	0.0	0.0	0.0	0.0
PLEKHA7	144100	symbol	H. sapiens	144100	H. sapiens	PLEKHA7	pleckstrin homology domain containing A7	GO:0045218 zonula adherens maintenance;GO:0034334 adherens junction maintenance;GO:0045217 cell-cell junction maintenance		Predicted intracellular proteins	Cell Junctions;Nucleoplasm (Enhanced); Additional: Cytosol		(M232)PID ECADHERIN STABILIZATION PATHWAY		0.0	0.0	0.0	0.0	0.0	0.0	0.0	0.0	0.0	0.0	0.0	0.0	0.0	1.0	0.0	0.0	0.0	0.0	0.0	0.0
VIM	7431	symbol	H. sapiens	7431	H. sapiens	VIM	vimentin	GO:0060020 Bergmann glial cell differentiation;GO:0071225 cellular response to muramyl dipeptide;GO:0070307 lens fiber cell development		Predicted intracellular proteins; Disease related genes	Intermediate filaments (Supported)	Artenimol; Phenethyl Isothiocyanate	(M14)PID AURORA B PATHWAY; (M220)PID CASPASE PATHWAY	(M5930)HALLMARK EPITHELIAL MESENCHYMAL TRANSITION	1.0	1.0	1.0	1.0	0.0	0.0	0.0	0.0	0.0	0.0	0.0	0.0	0.0	0.0	0.0	0.0	0.0	0.0	0.0	1.0
NDRG1	10397	symbol	H. sapiens	10397	H. sapiens	NDRG1	N-myc downstream regulated 1	GO:0032287 peripheral nervous system myelin maintenance;GO:0043217 myelin maintenance;GO:0022011 myelination in peripheral nervous system		Cancer-related genes:Candidate cancer biomarkers; Predicted intracellular proteins; Disease related genes	Cytosol (Supported); Additional: Microtubules		(M254)PID MYC REPRESS PATHWAY; (M255)PID HIF1 TFPATHWAY; (M145)PID P53 DOWNSTREAM PATHWAY	(M5908)HALLMARK ANDROGEN RESPONSE; (M5947)HALLMARK IL2 STAT5 SIGNALING; (M5891)HALLMARK HYPOXIA	0.0	0.0	0.0	0.0	0.0	0.0	0.0	0.0	0.0	0.0	0.0	0.0	0.0	0.0	0.0	0.0	0.0	0.0	0.0	0.0
CEP126	57562	symbol	H. sapiens	57562	H. sapiens	CEP126	centrosomal protein 126	GO:1905515 non-motile cilium assembly;GO:0031122 cytoplasmic microtubule organization;GO:0007052 mitotic spindle organization		Predicted intracellular proteins	Cytosol;Nucleoplasm (Uncertain)				1.0	0.0	0.0	0.0	1.0	0.0	0.0	0.0	0.0	0.0	0.0	0.0	0.0	0.0	0.0	0.0	0.0	0.0	0.0	0.0
PAX8	7849	symbol	H. sapiens	7849	H. sapiens	PAX8	paired box 8	GO:2000612 regulation of thyroid-stimulating hormone secretion;GO:0039003 pronephric field specification;GO:0039017 pattern specification involved in pronephros development		Cancer-related genes:Candidate cancer biomarkers; Predicted intracellular proteins; Disease related genes; Transcription factors:Helix-turn-helix domains	Nucleoplasm (Enhanced)				0.0	0.0	0.0	0.0	0.0	1.0	0.0	0.0	1.0	0.0	0.0	0.0	0.0	0.0	0.0	0.0	0.0	0.0	0.0	0.0
ACTN3	89	symbol	H. sapiens	89	H. sapiens	ACTN3	actinin alpha 3	GO:0031446 regulation of fast-twitch skeletal muscle fiber contraction;GO:0031448 positive regulation of fast-twitch skeletal muscle fiber contraction;GO:1900159 positive regulation of bone mineralization involved in bone maturation		Predicted intracellular proteins	Actin filaments (Uncertain)			(M5909)HALLMARK MYOGENESIS; (M5915)HALLMARK APICAL JUNCTION	0.0	0.0	0.0	0.0	0.0	0.0	0.0	0.0	1.0	0.0	1.0	0.0	0.0	0.0	0.0	0.0	0.0	1.0	0.0	0.0
LRP4	4038	symbol	H. sapiens	4038	H. sapiens	LRP4	LDL receptor related protein 4	GO:1901629 regulation of presynaptic membrane organization;GO:1901631 positive regulation of presynaptic membrane organization;GO:1904395 positive regulation of skeletal muscle acetylcholine-gated channel clustering		Predicted intracellular proteins; Disease related genes	Mitochondria;Nucleoli;Nucleoplasm (Uncertain)				1.0	0.0	0.0	1.0	0.0	1.0	0.0	0.0	0.0	0.0	0.0	0.0	0.0	0.0	0.0	0.0	0.0	0.0	0.0	0.0
CD109	135228	symbol	H. sapiens	135228	H. sapiens	CD109	CD109 molecule	GO:0072675 osteoclast fusion;GO:0072674 multinuclear osteoclast differentiation;GO:0010839 negative regulation of keratinocyte proliferation		CD markers	Plasma membrane (Supported); Additional: Cytosol		(M3468)NABA ECM REGULATORS; (M5885)NABA MATRISOME ASSOCIATED; (M5889)NABA MATRISOME		0.0	0.0	1.0	0.0	0.0	0.0	0.0	0.0	0.0	1.0	0.0	0.0	0.0	0.0	0.0	0.0	0.0	0.0	0.0	0.0
DYNLT1	6993	symbol	H. sapiens	6993	H. sapiens	DYNLT1	dynein light chain Tctex-type 1	GO:0075519 microtubule-dependent intracellular transport of viral material;GO:0075521 microtubule-dependent intracellular transport of viral material towards nucleus;GO:0075606 transport of viral material towards nucleus		Predicted intracellular proteins	Nucleoplasm (Approved)		(M163)PID LIS1 PATHWAY; (M187)PID TRKR PATHWAY		0.0	0.0	0.0	1.0	0.0	0.0	0.0	0.0	0.0	0.0	0.0	0.0	0.0	0.0	0.0	0.0	0.0	0.0	0.0	0.0
SEMA4D	10507	symbol	H. sapiens	10507	H. sapiens	SEMA4D	semaphorin 4D	GO:1900220 semaphorin-plexin signaling pathway involved in bone trabecula morphogenesis;GO:1905704 positive regulation of inhibitory synapse assembly;GO:0010693 negative regulation of alkaline phosphatase activity		Predicted intracellular proteins; CD markers			(M5880)NABA ECM AFFILIATED; (M5885)NABA MATRISOME ASSOCIATED; (M5889)NABA MATRISOME	(M5932)HALLMARK INFLAMMATORY RESPONSE	0.0	0.0	0.0	1.0	0.0	0.0	0.0	1.0	0.0	1.0	1.0	0.0	0.0	0.0	0.0	1.0	0.0	0.0	0.0	0.0
RAD21	5885	symbol	H. sapiens	5885	H. sapiens	RAD21	RAD21 cohesin complex component	GO:1990414 replication-born double-strand break repair via sister chromatid exchange;GO:0045876 positive regulation of sister chromatid cohesion;GO:0007063 regulation of sister chromatid cohesion		Cancer-related genes:Mutated cancer genes; Cancer-related genes:Mutational cancer driver genes; Disease related genes; Predicted intracellular proteins	Nucleoplasm (Enhanced)			(M5901)HALLMARK G2M CHECKPOINT; (M5925)HALLMARK E2F TARGETS	0.0	0.0	0.0	0.0	0.0	0.0	0.0	0.0	0.0	0.0	0.0	0.0	0.0	0.0	0.0	0.0	0.0	0.0	0.0	0.0
ETFDH	2110	symbol	H. sapiens	2110	H. sapiens	ETFDH	electron transfer flavoprotein dehydrogenase	GO:0033539 fatty acid beta-oxidation using acyl-CoA dehydrogenase;GO:0006635 fatty acid beta-oxidation;GO:0009062 fatty acid catabolic process		Predicted intracellular proteins; Enzymes; ENZYME proteins:Oxidoreductases; Disease related genes; Potential drug targets		Metformin; 2-Hexyloxy-6-Hydroxymethyl-Tetrahydro-Pyran-3,4,5-Triol		(M5935)HALLMARK FATTY ACID METABOLISM; (M5934)HALLMARK XENOBIOTIC METABOLISM; (M5936)HALLMARK OXIDATIVE PHOSPHORYLATION	0.0	0.0	0.0	0.0	0.0	0.0	0.0	0.0	1.0	0.0	0.0	0.0	0.0	0.0	0.0	0.0	0.0	0.0	0.0	0.0
PER3	8863	symbol	H. sapiens	8863	H. sapiens	PER3	period circadian regulator 3	GO:0045187 regulation of circadian sleep/wake cycle, sleep;GO:0050802 circadian sleep/wake cycle, sleep;GO:0042749 regulation of circadian sleep/wake cycle		Predicted intracellular proteins; Disease related genes	Cytosol (Supported)				0.0	0.0	0.0	0.0	0.0	0.0	0.0	0.0	0.0	0.0	0.0	0.0	0.0	0.0	0.0	0.0	0.0	0.0	1.0	0.0
FAM13B	51306	symbol	H. sapiens	51306	H. sapiens	FAM13B	family with sequence similarity 13 member B	GO:0051056 regulation of small GTPase mediated signal transduction;GO:0007264 small GTPase mediated signal transduction;GO:1902531 regulation of intracellular signal transduction		Predicted intracellular proteins	Nucleoplasm (Approved)				0.0	0.0	0.0	0.0	0.0	0.0	0.0	0.0	0.0	0.0	0.0	0.0	0.0	0.0	0.0	0.0	0.0	0.0	0.0	0.0
PRTFDC1	56952	symbol	H. sapiens	56952	H. sapiens	PRTFDC1	phosphoribosyl transferase domain containing 1	GO:0006178 guanine salvage;GO:0046099 guanine biosynthetic process;GO:0043096 purine nucleobase salvage		Predicted intracellular proteins	Nucleoplasm (Approved); Additional: Cytosol;Golgi apparatus				0.0	0.0	0.0	0.0	0.0	0.0	0.0	0.0	1.0	0.0	0.0	0.0	0.0	0.0	0.0	0.0	0.0	0.0	0.0	0.0
SIT1	27240	symbol	H. sapiens	27240	H. sapiens	SIT1	signaling threshold regulating transmembrane adaptor 1	GO:0043029 T cell homeostasis;GO:0002260 lymphocyte homeostasis;GO:0001776 leukocyte homeostasis						(M5950)HALLMARK ALLOGRAFT REJECTION	0.0	0.0	0.0	0.0	0.0	0.0	1.0	0.0	0.0	0.0	0.0	0.0	0.0	0.0	0.0	0.0	0.0	0.0	0.0	0.0
HENMT1	113802	symbol	H. sapiens	113802	H. sapiens	HENMT1	HEN methyltransferase 1	GO:0030422 production of siRNA involved in RNA interference;GO:0016246 RNA interference;GO:0034587 piRNA metabolic process		ENZYME proteins:Transferases; Predicted intracellular proteins; Enzymes	Focal adhesion sites;Plasma membrane (Approved)				0.0	0.0	0.0	0.0	0.0	0.0	0.0	0.0	0.0	0.0	0.0	0.0	0.0	0.0	0.0	0.0	0.0	0.0	0.0	0.0
HOXC6	3223	symbol	H. sapiens	3223	H. sapiens	HOXC6	homeobox C6	GO:0009952 anterior/posterior pattern specification;GO:0003002 regionalization;GO:0007389 pattern specification process		Predicted intracellular proteins; Transcription factors:Helix-turn-helix domains	Nucleoplasm (Supported); Additional: Cytosol				0.0	0.0	0.0	0.0	0.0	1.0	0.0	0.0	0.0	0.0	0.0	0.0	0.0	0.0	0.0	0.0	0.0	0.0	0.0	0.0
DNASE1L3	1776	symbol	H. sapiens	1776	H. sapiens	DNASE1L3	deoxyribonuclease 1 like 3	GO:0070948 regulation of neutrophil mediated cytotoxicity;GO:0010623 programmed cell death involved in cell development;GO:0070942 neutrophil mediated cytotoxicity		Predicted intracellular proteins; Predicted secreted proteins; Disease related genes					0.0	0.0	0.0	0.0	0.0	0.0	1.0	0.0	0.0	0.0	0.0	0.0	0.0	0.0	0.0	0.0	0.0	0.0	0.0	0.0
KDM8	79831	symbol	H. sapiens	79831	H. sapiens	KDM8	lysine demethylase 8	GO:0070544 histone H3-K36 demethylation;GO:0070076 histone lysine demethylation;GO:0016577 histone demethylation		Predicted intracellular proteins; Enzymes; ENZYME proteins:Oxidoreductases	Nucleoplasm (Approved); Additional: Cytosol				0.0	0.0	0.0	0.0	0.0	0.0	0.0	0.0	0.0	0.0	0.0	0.0	0.0	0.0	0.0	0.0	0.0	0.0	0.0	0.0
CPNE8	144402	symbol	H. sapiens	144402	H. sapiens	CPNE8	copine 8	GO:0071277 cellular response to calcium ion;GO:0051592 response to calcium ion;GO:0071248 cellular response to metal ion		Predicted intracellular proteins					0.0	0.0	0.0	0.0	0.0	0.0	0.0	0.0	0.0	0.0	0.0	0.0	0.0	0.0	0.0	0.0	0.0	0.0	0.0	0.0
MED7	9443	symbol	H. sapiens	9443	H. sapiens	MED7	mediator complex subunit 7	GO:0006367 transcription initiation from RNA polymerase II promoter;GO:0019827 stem cell population maintenance;GO:0098727 maintenance of cell number		Predicted intracellular proteins	Nuclear bodies (Supported)				0.0	0.0	0.0	0.0	0.0	0.0	0.0	0.0	0.0	0.0	0.0	0.0	0.0	0.0	0.0	0.0	0.0	0.0	0.0	0.0
FMOD	2331	symbol	H. sapiens	2331	H. sapiens	FMOD	fibromodulin	GO:0007181 transforming growth factor beta receptor complex assembly;GO:0030199 collagen fibril organization;GO:0007179 transforming growth factor beta receptor signaling pathway		Predicted secreted proteins			(M5882)NABA PROTEOGLYCANS; (M5884)NABA CORE MATRISOME; (M5889)NABA MATRISOME	(M5930)HALLMARK EPITHELIAL MESENCHYMAL TRANSITION	1.0	0.0	1.0	0.0	0.0	0.0	0.0	0.0	0.0	0.0	0.0	0.0	0.0	0.0	0.0	0.0	0.0	0.0	0.0	0.0
CCDC74B	91409	symbol	H. sapiens	91409	H. sapiens	CCDC74B	coiled-coil domain containing 74B			Predicted intracellular proteins	Vesicles (Uncertain)				0.0	0.0	0.0	0.0	0.0	0.0	0.0	0.0	0.0	0.0	0.0	0.0	0.0	0.0	0.0	0.0	0.0	0.0	0.0	0.0
MOSPD2	158747	symbol	H. sapiens	158747	H. sapiens	MOSPD2	motile sperm domain containing 2	GO:0090026 positive regulation of monocyte chemotaxis;GO:0090023 positive regulation of neutrophil chemotaxis;GO:0071624 positive regulation of granulocyte chemotaxis		Predicted intracellular proteins	Endoplasmic reticulum (Approved)				0.0	0.0	0.0	0.0	0.0	0.0	0.0	1.0	0.0	0.0	0.0	0.0	0.0	0.0	0.0	0.0	0.0	0.0	0.0	0.0
PSTPIP1	9051	symbol	H. sapiens	9051	H. sapiens	PSTPIP1	proline-serine-threonine phosphatase interacting protein 1	GO:0030041 actin filament polymerization;GO:0008154 actin polymerization or depolymerization;GO:0051258 protein polymerization		Predicted intracellular proteins; Disease related genes					1.0	0.0	0.0	0.0	0.0	0.0	0.0	0.0	0.0	0.0	0.0	0.0	0.0	0.0	0.0	0.0	0.0	0.0	0.0	0.0
PTPN18	26469	symbol	H. sapiens	26469	H. sapiens	PTPN18	protein tyrosine phosphatase non-receptor type 18	GO:1901185 negative regulation of ERBB signaling pathway;GO:0001825 blastocyst formation;GO:1901184 regulation of ERBB signaling pathway		Predicted intracellular proteins; ENZYME proteins:Hydrolases; Enzymes	Intermediate filaments (Approved)				0.0	1.0	0.0	0.0	0.0	0.0	0.0	0.0	0.0	0.0	0.0	0.0	0.0	0.0	0.0	0.0	0.0	0.0	0.0	0.0
CAPN3	825	symbol	H. sapiens	825	H. sapiens	CAPN3	calpain 3	GO:1990092 calcium-dependent self proteolysis;GO:0014717 regulation of satellite cell activation involved in skeletal muscle regeneration;GO:0014718 positive regulation of satellite cell activation involved in skeletal muscle regeneration		Peptidases:Cysteine-type peptidases; Predicted intracellular proteins; ENZYME proteins:Hydrolases; Enzymes; Disease related genes; Potential drug targets		L-aminocarnityl-succinyl-leucyl-argininal-diethylacetal		(M5947)HALLMARK IL2 STAT5 SIGNALING	1.0	0.0	0.0	0.0	0.0	0.0	1.0	0.0	0.0	0.0	1.0	0.0	0.0	0.0	1.0	0.0	0.0	0.0	0.0	0.0
GDPD5	81544	symbol	H. sapiens	81544	H. sapiens	GDPD5	glycerophosphodiester phosphodiesterase domain containing 5	GO:0006629 lipid metabolic process;GO:0007399 nervous system development;GO:0048731 system development			Golgi apparatus (Approved)				0.0	0.0	0.0	0.0	0.0	0.0	0.0	0.0	0.0	0.0	0.0	0.0	0.0	0.0	0.0	0.0	0.0	0.0	0.0	0.0
KCTD2	23510	symbol	H. sapiens	23510	H. sapiens	KCTD2	potassium channel tetramerization domain containing 2	GO:0051260 protein homooligomerization;GO:0051259 protein complex oligomerization;GO:0043161 proteasome-mediated ubiquitin-dependent protein catabolic process		Predicted intracellular proteins					0.0	0.0	0.0	0.0	0.0	0.0	0.0	0.0	0.0	0.0	0.0	0.0	0.0	0.0	0.0	0.0	0.0	0.0	0.0	0.0
PIWIL4	143689	symbol	H. sapiens	143689	H. sapiens	PIWIL4	piwi like RNA-mediated gene silencing 4	GO:0034587 piRNA metabolic process;GO:0043046 DNA methylation involved in gamete generation;GO:0010528 regulation of transposition		Predicted intracellular proteins	Mitochondria;Nucleoplasm (Approved)				0.0	0.0	0.0	0.0	0.0	0.0	0.0	0.0	0.0	0.0	0.0	0.0	0.0	0.0	0.0	0.0	0.0	0.0	0.0	0.0
RNF39	80352	symbol	H. sapiens	80352	H. sapiens	RNF39	ring finger protein 39	GO:0016567 protein ubiquitination;GO:0032446 protein modification by small protein conjugation;GO:0045087 innate immune response		Predicted intracellular proteins	Centrosome;Plasma membrane;Vesicles (Approved)				0.0	0.0	0.0	0.0	0.0	0.0	0.0	0.0	0.0	0.0	0.0	0.0	0.0	0.0	0.0	0.0	0.0	0.0	0.0	0.0
ZEB1	6935	symbol	H. sapiens	6935	H. sapiens	ZEB1	zinc finger E-box binding homeobox 1	GO:0045602 negative regulation of endothelial cell differentiation;GO:0045601 regulation of endothelial cell differentiation;GO:0030857 negative regulation of epithelial cell differentiation		Predicted intracellular proteins; Disease related genes; Transcription factors:Helix-turn-helix domains	Nucleoplasm (Supported); Additional: Nucleoli		(M71)PID ILK PATHWAY	(M5921)HALLMARK COMPLEMENT	0.0	1.0	0.0	0.0	0.0	0.0	0.0	1.0	0.0	0.0	0.0	0.0	0.0	0.0	0.0	0.0	0.0	0.0	0.0	0.0
MBD4	8930	symbol	H. sapiens	8930	H. sapiens	MBD4	methyl-CpG binding domain 4, DNA glycosylase	GO:0045008 depyrimidination;GO:0006285 base-excision repair, AP site formation;GO:0009223 pyrimidine deoxyribonucleotide catabolic process		Cancer-related genes:Candidate cancer biomarkers; Predicted intracellular proteins	Nuclear speckles (Supported)				0.0	0.0	0.0	0.0	0.0	0.0	0.0	0.0	0.0	0.0	0.0	0.0	0.0	0.0	0.0	0.0	0.0	0.0	0.0	0.0
NEK1	4750	symbol	H. sapiens	4750	H. sapiens	NEK1	NIMA related kinase 1	GO:0042769 DNA damage response, detection of DNA damage;GO:0060271 cilium assembly;GO:0018108 peptidyl-tyrosine phosphorylation	NEK Ser/Thr protein kinase family	ENZYME proteins:Transferases; Predicted intracellular proteins; Enzymes; Disease related genes; Kinases:NEK Ser/Thr protein kinases; Potential drug targets	Cytosol (Supported); Additional: Centriolar satellite;Nucleoplasm	Fostamatinib	(M10154)SA G2 AND M PHASES		0.0	0.0	0.0	1.0	1.0	0.0	0.0	0.0	0.0	0.0	0.0	0.0	0.0	0.0	0.0	0.0	0.0	0.0	0.0	0.0
CBX7	23492	symbol	H. sapiens	23492	H. sapiens	CBX7	chromobox 7	GO:0006325 chromatin organization;GO:0000122 negative regulation of transcription by RNA polymerase II;GO:0051276 chromosome organization		Predicted intracellular proteins	Nucleoplasm (Supported); Additional: Cytosol				0.0	0.0	0.0	0.0	0.0	0.0	0.0	0.0	0.0	0.0	0.0	0.0	0.0	0.0	0.0	0.0	0.0	0.0	0.0	0.0
SMCO2	341346	symbol	H. sapiens	341346	H. sapiens	SMCO2	single-pass membrane protein with coiled-coil domains 2								0.0	0.0	0.0	0.0	0.0	0.0	0.0	0.0	0.0	0.0	0.0	0.0	0.0	0.0	0.0	0.0	0.0	0.0	0.0	0.0
SRPK3	26576	symbol	H. sapiens	26576	H. sapiens	SRPK3	SRSF protein kinase 3	GO:0000245 spliceosomal complex assembly;GO:0050684 regulation of mRNA processing;GO:0007519 skeletal muscle tissue development	CMGC Ser/Thr protein kinase family	ENZYME proteins:Transferases; Predicted intracellular proteins; Kinases:CMGC Ser/Thr protein kinases; Enzymes					0.0	0.0	0.0	0.0	0.0	0.0	0.0	0.0	0.0	0.0	0.0	0.0	0.0	0.0	0.0	0.0	0.0	0.0	0.0	0.0
PARP4	143	symbol	H. sapiens	143	H. sapiens	PARP4	poly(ADP-ribose) polymerase family member 4	GO:0140289 protein mono-ADP-ribosylation;GO:0006471 protein ADP-ribosylation;GO:0051972 regulation of telomerase activity		ENZYME proteins:Transferases; Predicted intracellular proteins; Enzymes	Cytosol (Supported)				0.0	0.0	0.0	0.0	0.0	0.0	0.0	0.0	0.0	0.0	0.0	0.0	0.0	0.0	0.0	1.0	0.0	0.0	0.0	0.0
SLC25A43	203427	symbol	H. sapiens	203427	H. sapiens	SLC25A43	solute carrier family 25 member 43	GO:0055085 transmembrane transport;GO:0006810 transport;GO:0051234 establishment of localization		Transporters:Electrochemical Potential-driven transporters	Cytosol (Approved)				0.0	0.0	0.0	0.0	0.0	0.0	0.0	0.0	0.0	0.0	0.0	0.0	0.0	0.0	0.0	0.0	0.0	0.0	0.0	0.0
DUSP5P1	574029	symbol	H. sapiens	574029	H. sapiens	DUSP5P1	dual specificity phosphatase 5 pseudogene 1								0.0	0.0	0.0	0.0	0.0	0.0	0.0	0.0	0.0	0.0	0.0	0.0	0.0	0.0	0.0	0.0	0.0	0.0	0.0	0.0
FBLN5	10516	symbol	H. sapiens	10516	H. sapiens	FBLN5	fibulin 5	GO:0048251 elastic fiber assembly;GO:2000121 regulation of removal of superoxide radicals;GO:0019430 removal of superoxide radicals		Predicted secreted proteins; Disease related genes	Plasma membrane (Supported)		(M3008)NABA ECM GLYCOPROTEINS; (M5884)NABA CORE MATRISOME; (M5889)NABA MATRISOME	(M5942)HALLMARK UV RESPONSE DN; (M5930)HALLMARK EPITHELIAL MESENCHYMAL TRANSITION	1.0	0.0	0.0	0.0	0.0	0.0	0.0	0.0	0.0	0.0	0.0	0.0	0.0	0.0	0.0	0.0	0.0	0.0	0.0	0.0
TRIP10	9322	symbol	H. sapiens	9322	H. sapiens	TRIP10	thyroid hormone receptor interactor 10	GO:0006897 endocytosis;GO:0030036 actin cytoskeleton organization;GO:0030029 actin filament-based process		Predicted intracellular proteins	Vesicles (Supported); Additional: Nucleoplasm		(M247)PID INSULIN GLUCOSE PATHWAY; (M16)PID INSULIN PATHWAY	(M5890)HALLMARK TNFA SIGNALING VIA NFKB	0.0	0.0	0.0	0.0	0.0	0.0	0.0	0.0	0.0	0.0	0.0	0.0	0.0	0.0	0.0	0.0	0.0	0.0	0.0	0.0
ELK3	2004	symbol	H. sapiens	2004	H. sapiens	ELK3	ETS transcription factor ELK3	GO:0042060 wound healing;GO:0009611 response to wounding;GO:0001525 angiogenesis		Cancer-related genes:Candidate cancer biomarkers; Predicted intracellular proteins; Transcription factors:Helix-turn-helix domains	Nucleoplasm (Supported); Additional: Mitochondria				0.0	0.0	0.0	0.0	0.0	0.0	0.0	0.0	0.0	0.0	0.0	0.0	0.0	0.0	0.0	0.0	0.0	0.0	0.0	0.0
CFAP44	55779	symbol	H. sapiens	55779	H. sapiens	CFAP44	cilia and flagella associated protein 44	GO:0007288 sperm axoneme assembly;GO:0120316 sperm flagellum assembly;GO:0044458 motile cilium assembly		Predicted intracellular proteins					0.0	0.0	0.0	0.0	1.0	0.0	0.0	0.0	0.0	0.0	0.0	0.0	0.0	0.0	0.0	0.0	0.0	0.0	0.0	0.0
NUBP1	4682	symbol	H. sapiens	4682	H. sapiens	NUBP1	nucleotide binding protein 1	GO:0072697 protein localization to cell cortex;GO:0010826 negative regulation of centrosome duplication;GO:0046606 negative regulation of centrosome cycle		Predicted intracellular proteins	Cytosol (Supported)				0.0	0.0	0.0	0.0	0.0	0.0	0.0	0.0	0.0	0.0	0.0	0.0	0.0	0.0	1.0	0.0	0.0	0.0	0.0	0.0
CCDC176	80127	gene_synonym	H. sapiens	80127	H. sapiens	BBOF1	basal body orientation factor 1	GO:0044458 motile cilium assembly;GO:0060271 cilium assembly;GO:0044782 cilium organization		Predicted intracellular proteins	Nucleoplasm;Plasma membrane (Approved); Additional: Centriolar satellite				0.0	0.0	0.0	0.0	1.0	0.0	0.0	0.0	0.0	0.0	0.0	0.0	0.0	0.0	0.0	0.0	0.0	0.0	0.0	0.0
SLC25A28	81894	symbol	H. sapiens	81894	H. sapiens	SLC25A28	solute carrier family 25 member 28	GO:0048250 iron import into the mitochondrion;GO:0034755 iron ion transmembrane transport;GO:0006826 iron ion transport		Predicted intracellular proteins; Transporters:Electrochemical Potential-driven transporters				(M5911)HALLMARK INTERFERON ALPHA RESPONSE; (M5913)HALLMARK INTERFERON GAMMA RESPONSE	0.0	0.0	0.0	0.0	0.0	0.0	0.0	0.0	0.0	0.0	0.0	0.0	0.0	0.0	1.0	0.0	0.0	0.0	0.0	0.0
SERPING1	710	symbol	H. sapiens	710	H. sapiens	SERPING1	serpin family G member 1	GO:0001868 regulation of complement activation, lectin pathway;GO:0001869 negative regulation of complement activation, lectin pathway;GO:0001867 complement activation, lectin pathway		Candidate cardiovascular disease genes; Predicted secreted proteins; Disease related genes; Predicted intracellular proteins		PPL-100; Copper	(M3468)NABA ECM REGULATORS; (M5885)NABA MATRISOME ASSOCIATED; (M5889)NABA MATRISOME	(M5946)HALLMARK COAGULATION; (M5913)HALLMARK INTERFERON GAMMA RESPONSE; (M5921)HALLMARK COMPLEMENT	0.0	0.0	0.0	0.0	0.0	0.0	1.0	0.0	0.0	1.0	0.0	0.0	0.0	0.0	0.0	0.0	0.0	0.0	0.0	0.0
FUT8	2530	symbol	H. sapiens	2530	H. sapiens	FUT8	fucosyltransferase 8	GO:0036071 N-glycan fucosylation;GO:0033578 protein glycosylation in Golgi;GO:0046368 GDP-L-fucose metabolic process		ENZYME proteins:Transferases; Predicted intracellular proteins; Enzymes	Golgi apparatus (Approved); Additional: Cytosol;Nucleoplasm			(M5937)HALLMARK GLYCOLYSIS	0.0	0.0	1.0	0.0	0.0	0.0	0.0	0.0	0.0	0.0	0.0	0.0	0.0	0.0	0.0	1.0	0.0	0.0	0.0	0.0
AQP9	366	symbol	H. sapiens	366	H. sapiens	AQP9	aquaporin 9	GO:0015722 canalicular bile acid transport;GO:1904823 purine nucleobase transmembrane transport;GO:0015855 pyrimidine nucleobase transport		Transporters:Transporter channels and pores				(M5948)HALLMARK BILE ACID METABOLISM; (M5932)HALLMARK INFLAMMATORY RESPONSE; (M5934)HALLMARK XENOBIOTIC METABOLISM	0.0	0.0	0.0	0.0	0.0	0.0	0.0	0.0	0.0	0.0	0.0	0.0	0.0	0.0	0.0	0.0	0.0	0.0	0.0	1.0
COLGALT2	23127	symbol	H. sapiens	23127	H. sapiens	COLGALT2	collagen beta(1-O)galactosyltransferase 2	GO:0030199 collagen fibril organization;GO:0030198 extracellular matrix organization;GO:0043062 extracellular structure organization		ENZYME proteins:Transferases; Predicted intracellular proteins; Enzymes	Nucleoplasm (Approved); Additional: Vesicles				1.0	0.0	0.0	0.0	0.0	0.0	0.0	0.0	0.0	0.0	0.0	0.0	0.0	0.0	0.0	0.0	0.0	0.0	0.0	0.0
PPP1R21	129285	symbol	H. sapiens	129285	H. sapiens	PPP1R21	protein phosphatase 1 regulatory subunit 21			Predicted intracellular proteins	Vesicles (Approved); Additional: Nucleoplasm				0.0	0.0	0.0	0.0	0.0	0.0	0.0	0.0	0.0	0.0	0.0	0.0	0.0	0.0	0.0	0.0	0.0	0.0	0.0	0.0
THBD	7056	symbol	H. sapiens	7056	H. sapiens	THBD	thrombomodulin	GO:0051918 negative regulation of fibrinolysis;GO:0051917 regulation of fibrinolysis;GO:0010544 negative regulation of platelet activation		Candidate cardiovascular disease genes; Disease related genes; CD markers	Cytosol;Nucleoplasm (Approved)	Drotrecogin alfa; Ibuprofen; Dexibuprofen	(M65)PID FRA PATHWAY	(M5944)HALLMARK ANGIOGENESIS; (M5946)HALLMARK COAGULATION	0.0	0.0	0.0	0.0	0.0	0.0	1.0	1.0	0.0	1.0	0.0	0.0	0.0	0.0	0.0	0.0	0.0	0.0	0.0	0.0
PRKAB2	5565	symbol	H. sapiens	5565	H. sapiens	PRKAB2	protein kinase AMP-activated non-catalytic subunit beta 2	GO:0120162 positive regulation of cold-induced thermogenesis;GO:0106106 cold-induced thermogenesis;GO:0120161 regulation of cold-induced thermogenesis		Predicted intracellular proteins	Nucleoplasm (Approved); Additional: Cytosol				0.0	0.0	0.0	0.0	0.0	0.0	0.0	0.0	1.0	0.0	0.0	0.0	0.0	0.0	0.0	0.0	0.0	1.0	0.0	0.0
DPT	1805	symbol	H. sapiens	1805	H. sapiens	DPT	dermatopontin	GO:0030199 collagen fibril organization;GO:0030198 extracellular matrix organization;GO:0043062 extracellular structure organization		Predicted secreted proteins	Vesicles (Approved)		(M3008)NABA ECM GLYCOPROTEINS; (M5884)NABA CORE MATRISOME; (M5889)NABA MATRISOME		1.0	0.0	0.0	0.0	0.0	0.0	0.0	0.0	0.0	0.0	0.0	0.0	0.0	0.0	0.0	0.0	0.0	0.0	0.0	0.0
PLP2	5355	symbol	H. sapiens	5355	H. sapiens	PLP2	proteolipid protein 2	GO:0019221 cytokine-mediated signaling pathway;GO:0006935 chemotaxis;GO:0042330 taxis		Transporters:Transporter channels and pores					0.0	0.0	0.0	0.0	0.0	0.0	0.0	1.0	0.0	0.0	0.0	0.0	0.0	0.0	0.0	0.0	0.0	0.0	0.0	0.0
CUBN	8029	symbol	H. sapiens	8029	H. sapiens	CUBN	cubilin	GO:0015889 cobalamin transport;GO:0042953 lipoprotein transport;GO:0044872 lipoprotein localization		Predicted intracellular proteins; Disease related genes		Hydroxocobalamin			0.0	0.0	0.0	0.0	0.0	0.0	0.0	0.0	1.0	0.0	0.0	0.0	0.0	0.0	0.0	0.0	0.0	0.0	0.0	0.0
CCL28	56477	symbol	H. sapiens	56477	H. sapiens	CCL28	C-C motif chemokine ligand 28	GO:1903237 negative regulation of leukocyte tethering or rolling;GO:0002692 negative regulation of cellular extravasation;GO:1904995 negative regulation of leukocyte adhesion to vascular endothelial cell		Predicted intracellular proteins; Predicted secreted proteins			(M5883)NABA SECRETED FACTORS; (M5885)NABA MATRISOME ASSOCIATED; (M5889)NABA MATRISOME		0.0	0.0	0.0	0.0	0.0	0.0	1.0	1.0	0.0	1.0	0.0	0.0	0.0	0.0	1.0	0.0	0.0	0.0	0.0	0.0
APBB1IP	54518	symbol	H. sapiens	54518	H. sapiens	APBB1IP	amyloid beta precursor protein binding family B member 1 interacting protein	GO:0002291 T cell activation via T cell receptor contact with antigen bound to MHC molecule on antigen presenting cell;GO:0002286 T cell activation involved in immune response;GO:0002285 lymphocyte activation involved in immune response		Predicted intracellular proteins	Cytosol;Plasma membrane (Enhanced)				0.0	0.0	0.0	0.0	0.0	0.0	1.0	0.0	0.0	0.0	0.0	0.0	0.0	0.0	0.0	0.0	0.0	0.0	0.0	0.0
LOC101928943	101928943	Gene_ID	H. sapiens	101928943	H. sapiens	MADD-AS1	MADD antisense RNA 1								0.0	0.0	0.0	0.0	0.0	0.0	0.0	0.0	0.0	0.0	0.0	0.0	0.0	0.0	0.0	0.0	0.0	0.0	0.0	0.0
PREX2	80243	symbol	H. sapiens	80243	H. sapiens	PREX2	phosphatidylinositol-3,4,5-trisphosphate dependent Rac exchange factor 2	GO:0008344 adult locomotory behavior;GO:0030534 adult behavior;GO:0014065 phosphatidylinositol 3-kinase signaling		Predicted intracellular proteins; Cancer-related genes	Endoplasmic reticulum (Approved)		(M241)PID RAC1 REG PATHWAY		0.0	0.0	0.0	1.0	0.0	0.0	0.0	0.0	0.0	0.0	1.0	0.0	0.0	0.0	0.0	0.0	0.0	0.0	0.0	0.0

## Sheet: Enrichment
GroupID	Category	Term	Description	LogP	Log(q-value)	InTerm_InList	Genes	Symbols
1_Summary	Reactome Gene Sets	R-HSA-1474244	Extracellular matrix organization	-4.9819	-0.620193	12/301	102,825,2331,3676,3791,4038,4313,5654,10516,23127,81578,283208,1805,6423,7045,84168,1901,2280,7431,9051,10006,10344,23621,30011,57562,7060,8839	ADAM10,CAPN3,FMOD,ITGA4,KDR,LRP4,MMP2,HTRA1,FBLN5,COLGALT2,COL21A1,P4HA3,DPT,SFRP2,TGFBI,ANTXR1,S1PR1,FKBP1A,VIM,PSTPIP1,ABI1,CCL26,BACE1,SH3KBP1,CEP126,THBS4,CCN5
1_Member	Reactome Gene Sets	R-HSA-1474244	Extracellular matrix organization	-4.9819	-0.620193	12/301	102,825,2331,3676,3791,4038,4313,5654,10516,23127,81578,283208	ADAM10,CAPN3,FMOD,ITGA4,KDR,LRP4,MMP2,HTRA1,FBLN5,COLGALT2,COL21A1,P4HA3
1_Member	GO Biological Processes	GO:0030198	extracellular matrix organization	-2.95602	-0.263328	9/302	102,1805,2331,4313,6423,7045,10516,23127,84168	ADAM10,DPT,FMOD,MMP2,SFRP2,TGFBI,FBLN5,COLGALT2,ANTXR1
1_Member	GO Biological Processes	GO:0043062	extracellular structure organization	-2.94605	-0.263328	9/303	102,1805,2331,4313,6423,7045,10516,23127,84168	ADAM10,DPT,FMOD,MMP2,SFRP2,TGFBI,FBLN5,COLGALT2,ANTXR1
1_Member	GO Biological Processes	GO:0045229	external encapsulating structure organization	-2.92623	-0.263328	9/305	102,1805,2331,4313,6423,7045,10516,23127,84168	ADAM10,DPT,FMOD,MMP2,SFRP2,TGFBI,FBLN5,COLGALT2,ANTXR1
1_Member	GO Biological Processes	GO:0097435	supramolecular fiber organization	-2.7581	-0.233329	15/746	825,1805,1901,2280,2331,6423,7431,9051,10006,10344,10516,23127,23621,30011,57562	CAPN3,DPT,S1PR1,FKBP1A,FMOD,SFRP2,VIM,PSTPIP1,ABI1,CCL26,FBLN5,COLGALT2,BACE1,SH3KBP1,CEP126
1_Member	GO Biological Processes	GO:0030199	collagen fibril organization	-2.75619	-0.233329	4/61	1805,2331,6423,23127	DPT,FMOD,SFRP2,COLGALT2
1_Member	Canonical Pathways	M5884	NABA CORE MATRISOME	-2.04725	0	7/275	1805,2331,7045,7060,8839,10516,81578	DPT,FMOD,TGFBI,THBS4,CCN5,FBLN5,COL21A1
2_Summary	Reactome Gene Sets	R-HSA-6785807	Interleukin-4 and Interleukin-13 signaling	-4.43065	-0.490326	7/108	1901,2308,3598,4128,4313,6935,7431,3556,3574,11213,26469,58985,257397,23650	S1PR1,FOXO1,IL13RA2,MAOA,MMP2,ZEB1,VIM,IL1RAP,IL7,IRAK3,PTPN18,IL22RA1,TAB3,TRIM29
2_Member	Reactome Gene Sets	R-HSA-6785807	Interleukin-4 and Interleukin-13 signaling	-4.43065	-0.490326	7/108	1901,2308,3598,4128,4313,6935,7431	S1PR1,FOXO1,IL13RA2,MAOA,MMP2,ZEB1,VIM
2_Member	Reactome Gene Sets	R-HSA-449147	Signaling by Interleukins	-3.78832	-0.453527	13/462	1901,2308,3556,3574,3598,4128,4313,6935,7431,11213,26469,58985,257397	S1PR1,FOXO1,IL1RAP,IL7,IL13RA2,MAOA,MMP2,ZEB1,VIM,IRAK3,PTPN18,IL22RA1,TAB3
2_Member	Reactome Gene Sets	R-HSA-1280215	Cytokine Signaling in Immune system	-2.50512	-0.130918	14/715	1901,2308,3556,3574,3598,4128,4313,6935,7431,11213,23650,26469,58985,257397	S1PR1,FOXO1,IL1RAP,IL7,IL13RA2,MAOA,MMP2,ZEB1,VIM,IRAK3,TRIM29,PTPN18,IL22RA1,TAB3
3_Summary	GO Biological Processes	GO:0007178	transmembrane receptor protein serine/threonine kinase signaling pathway	-4.23319	-0.490326	12/359	2280,2331,2530,2660,4756,5654,6423,7431,9404,65997,135228,222223,3791,5028,9638	FKBP1A,FMOD,FUT8,MSTN,NEO1,HTRA1,SFRP2,VIM,LPXN,RASL11B,CD109,ELAPOR2,KDR,P2RY1,FEZ1
3_Member	GO Biological Processes	GO:0007178	transmembrane receptor protein serine/threonine kinase signaling pathway	-4.23319	-0.490326	12/359	2280,2331,2530,2660,4756,5654,6423,7431,9404,65997,135228,222223	FKBP1A,FMOD,FUT8,MSTN,NEO1,HTRA1,SFRP2,VIM,LPXN,RASL11B,CD109,ELAPOR2
3_Member	GO Biological Processes	GO:0007179	transforming growth factor beta receptor signaling pathway	-3.4816	-0.416246	8/202	2280,2331,2530,2660,5654,9404,65997,135228	FKBP1A,FMOD,FUT8,MSTN,HTRA1,LPXN,RASL11B,CD109
3_Member	GO Biological Processes	GO:0071560	cellular response to transforming growth factor beta stimulus	-2.83436	-0.250595	8/254	2280,2331,2530,2660,5654,9404,65997,135228	FKBP1A,FMOD,FUT8,MSTN,HTRA1,LPXN,RASL11B,CD109
3_Member	GO Biological Processes	GO:0090092	regulation of transmembrane receptor protein serine/threonine kinase signaling pathway	-2.80227	-0.239902	8/257	2280,2660,4756,5654,6423,65997,135228,222223	FKBP1A,MSTN,NEO1,HTRA1,SFRP2,RASL11B,CD109,ELAPOR2
3_Member	GO Biological Processes	GO:0071559	response to transforming growth factor beta	-2.77067	-0.233329	8/260	2280,2331,2530,2660,5654,9404,65997,135228	FKBP1A,FMOD,FUT8,MSTN,HTRA1,LPXN,RASL11B,CD109
3_Member	GO Biological Processes	GO:0070848	response to growth factor	-2.47831	-0.125198	14/720	2280,2331,2530,2660,3791,4756,5028,5654,6423,9404,9638,65997,135228,222223	FKBP1A,FMOD,FUT8,MSTN,KDR,NEO1,P2RY1,HTRA1,SFRP2,LPXN,FEZ1,RASL11B,CD109,ELAPOR2
3_Member	GO Biological Processes	GO:0030512	negative regulation of transforming growth factor beta receptor signaling pathway	-2.30934	-0.0551977	4/81	2280,5654,65997,135228	FKBP1A,HTRA1,RASL11B,CD109
3_Member	GO Biological Processes	GO:0090101	negative regulation of transmembrane receptor protein serine/threonine kinase signaling pathway	-2.30584	-0.0551977	5/130	2280,5654,6423,65997,135228	FKBP1A,HTRA1,SFRP2,RASL11B,CD109
3_Member	GO Biological Processes	GO:0071363	cellular response to growth factor stimulus	-2.23067	-0.0212523	13/689	2280,2331,2530,2660,3791,4756,5654,6423,9404,9638,65997,135228,222223	FKBP1A,FMOD,FUT8,MSTN,KDR,NEO1,HTRA1,SFRP2,LPXN,FEZ1,RASL11B,CD109,ELAPOR2
3_Member	GO Biological Processes	GO:0030510	regulation of BMP signaling pathway	-2.06699	0	4/95	4756,5654,6423,222223	NEO1,HTRA1,SFRP2,ELAPOR2
4_Summary	GO Biological Processes	GO:0018108	peptidyl-tyrosine phosphorylation	-4.04265	-0.490326	12/376	1195,3479,3574,3791,4038,4750,6423,7060,10006,10507,51704,57396,102,5376,6993,7336,7431,9638,57187,6801,80243	CLK1,IGF1,IL7,KDR,LRP4,NEK1,SFRP2,THBS4,ABI1,SEMA4D,GPRC5B,CLK4,ADAM10,PMP22,DYNLT1,UBE2V2,VIM,FEZ1,THOC2,STRN,PREX2
4_Member	GO Biological Processes	GO:0018108	peptidyl-tyrosine phosphorylation	-4.04265	-0.490326	12/376	1195,3479,3574,3791,4038,4750,6423,7060,10006,10507,51704,57396	CLK1,IGF1,IL7,KDR,LRP4,NEK1,SFRP2,THBS4,ABI1,SEMA4D,GPRC5B,CLK4
4_Member	GO Biological Processes	GO:0018212	peptidyl-tyrosine modification	-4.01019	-0.490326	12/379	1195,3479,3574,3791,4038,4750,6423,7060,10006,10507,51704,57396	CLK1,IGF1,IL7,KDR,LRP4,NEK1,SFRP2,THBS4,ABI1,SEMA4D,GPRC5B,CLK4
4_Member	GO Biological Processes	GO:0050730	regulation of peptidyl-tyrosine phosphorylation	-2.72926	-0.232491	8/264	3479,3574,4038,6423,7060,10006,10507,51704	IGF1,IL7,LRP4,SFRP2,THBS4,ABI1,SEMA4D,GPRC5B
4_Member	GO Biological Processes	GO:0010975	regulation of neuron projection development	-2.32971	-0.0551977	10/445	102,4038,5376,6423,6993,7336,7431,9638,10507,57187	ADAM10,LRP4,PMP22,SFRP2,DYNLT1,UBE2V2,VIM,FEZ1,SEMA4D,THOC2
4_Member	GO Biological Processes	GO:0016358	dendrite development	-2.32112	-0.0551977	7/244	102,4038,6801,6993,10006,10507,80243	ADAM10,LRP4,STRN,DYNLT1,ABI1,SEMA4D,PREX2
4_Member	GO Biological Processes	GO:0050731	positive regulation of peptidyl-tyrosine phosphorylation	-2.22102	-0.0210526	6/193	3479,4038,7060,10006,10507,51704	IGF1,LRP4,THBS4,ABI1,SEMA4D,GPRC5B
4_Member	GO Biological Processes	GO:0010977	negative regulation of neuron projection development	-2.21065	-0.0192065	5/137	4038,5376,7431,10507,57187	LRP4,PMP22,VIM,SEMA4D,THOC2
4_Member	GO Biological Processes	GO:0048813	dendrite morphogenesis	-2.09673	0	5/146	102,4038,10006,10507,80243	ADAM10,LRP4,ABI1,SEMA4D,PREX2
5_Summary	GO Biological Processes	GO:0120031	plasma membrane bounded cell projection assembly	-4.01594	-0.490326	15/564	1901,2012,2660,4750,5376,9371,22832,22885,23322,23639,53827,55779,57562,80127,219844	S1PR1,EMP1,MSTN,NEK1,PMP22,KIF3B,CEP162,ABLIM3,RPGRIP1L,DNAAF11,FXYD5,CFAP44,CEP126,BBOF1,HYLS1
5_Member	GO Biological Processes	GO:0120031	plasma membrane bounded cell projection assembly	-4.01594	-0.490326	15/564	1901,2012,2660,4750,5376,9371,22832,22885,23322,23639,53827,55779,57562,80127,219844	S1PR1,EMP1,MSTN,NEK1,PMP22,KIF3B,CEP162,ABLIM3,RPGRIP1L,DNAAF11,FXYD5,CFAP44,CEP126,BBOF1,HYLS1
5_Member	GO Biological Processes	GO:0030031	cell projection assembly	-3.89922	-0.453527	15/578	1901,2012,2660,4750,5376,9371,22832,22885,23322,23639,53827,55779,57562,80127,219844	S1PR1,EMP1,MSTN,NEK1,PMP22,KIF3B,CEP162,ABLIM3,RPGRIP1L,DNAAF11,FXYD5,CFAP44,CEP126,BBOF1,HYLS1
5_Member	GO Biological Processes	GO:0060271	cilium assembly	-2.95812	-0.263328	10/364	4750,9371,22832,22885,23322,23639,55779,57562,80127,219844	NEK1,KIF3B,CEP162,ABLIM3,RPGRIP1L,DNAAF11,CFAP44,CEP126,BBOF1,HYLS1
5_Member	GO Biological Processes	GO:0044782	cilium organization	-2.70429	-0.22752	10/394	4750,9371,22832,22885,23322,23639,55779,57562,80127,219844	NEK1,KIF3B,CEP162,ABLIM3,RPGRIP1L,DNAAF11,CFAP44,CEP126,BBOF1,HYLS1
5_Member	GO Biological Processes	GO:0044458	motile cilium assembly	-2.11329	0	3/48	23639,55779,80127	DNAAF11,CFAP44,BBOF1
6_Summary	GO Biological Processes	GO:0007389	pattern specification process	-4.00694	-0.490326	13/439	2018,2138,3223,4038,6423,6615,7849,9371,10006,10194,23322,23639,56603,220,3676,4313,123169,102	EMX2,EYA1,HOXC6,LRP4,SFRP2,SNAI1,PAX8,KIF3B,ABI1,TSHZ1,RPGRIP1L,DNAAF11,CYP26B1,ALDH1A3,ITGA4,MMP2,LEO1,ADAM10
6_Member	GO Biological Processes	GO:0007389	pattern specification process	-4.00694	-0.490326	13/439	2018,2138,3223,4038,6423,6615,7849,9371,10006,10194,23322,23639,56603	EMX2,EYA1,HOXC6,LRP4,SFRP2,SNAI1,PAX8,KIF3B,ABI1,TSHZ1,RPGRIP1L,DNAAF11,CYP26B1
6_Member	GO Biological Processes	GO:0003002	regionalization	-3.27239	-0.372538	10/331	2018,3223,4038,6423,6615,7849,10006,10194,23322,56603	EMX2,HOXC6,LRP4,SFRP2,SNAI1,PAX8,ABI1,TSHZ1,RPGRIP1L,CYP26B1
6_Member	GO Biological Processes	GO:0048598	embryonic morphogenesis	-2.31812	-0.0551977	12/595	220,2138,3676,4038,4313,6423,6615,7849,10194,23322,56603,123169	ALDH1A3,EYA1,ITGA4,LRP4,MMP2,SFRP2,SNAI1,PAX8,TSHZ1,RPGRIP1L,CYP26B1,LEO1
6_Member	GO Biological Processes	GO:0090102	cochlea development	-2.06431	0	3/50	102,2138,23322	ADAM10,EYA1,RPGRIP1L
6_Member	GO Biological Processes	GO:0043583	ear development	-2.02047	0	6/213	102,220,2138,7849,10194,23322	ADAM10,ALDH1A3,EYA1,PAX8,TSHZ1,RPGRIP1L
7_Summary	GO Biological Processes	GO:0002638	negative regulation of immunoglobulin production	-3.80086	-0.453527	3/13	3598,7009,10039,11213,7805,51704,353091,710,1776,135250,2852,5654,9404,56477,284021,717,54518,7056,825,3479,3574,27240,30011,56603	IL13RA2,TMBIM6,PARP3,IRAK3,LAPTM5,GPRC5B,RAET1G,SERPING1,DNASE1L3,RAET1E,GPER1,HTRA1,LPXN,CCL28,MILR1,C2,APBB1IP,THBD,CAPN3,IGF1,IL7,SIT1,SH3KBP1,CYP26B1
7_Member	GO Biological Processes	GO:0002638	negative regulation of immunoglobulin production	-3.80086	-0.453527	3/13	3598,7009,10039	IL13RA2,TMBIM6,PARP3
7_Member	GO Biological Processes	GO:0002701	negative regulation of production of molecular mediator of immune response	-3.49588	-0.416246	4/39	3598,7009,10039,11213	IL13RA2,TMBIM6,PARP3,IRAK3
7_Member	GO Biological Processes	GO:0002700	regulation of production of molecular mediator of immune response	-3.27185	-0.372538	7/166	3598,7009,7805,10039,11213,51704,353091	IL13RA2,TMBIM6,LAPTM5,PARP3,IRAK3,GPRC5B,RAET1G
7_Member	GO Biological Processes	GO:0002697	regulation of immune effector process	-3.17288	-0.361478	10/341	710,1776,3598,7009,7805,10039,11213,51704,135250,353091	SERPING1,DNASE1L3,IL13RA2,TMBIM6,LAPTM5,PARP3,IRAK3,GPRC5B,RAET1E,RAET1G
7_Member	GO Biological Processes	GO:0002683	negative regulation of immune system process	-2.92628	-0.263328	11/433	710,2852,3598,5654,7009,7805,9404,10039,11213,56477,284021	SERPING1,GPER1,IL13RA2,HTRA1,TMBIM6,LAPTM5,LPXN,PARP3,IRAK3,CCL28,MILR1
7_Member	GO Biological Processes	GO:0002698	negative regulation of immune effector process	-2.61625	-0.183962	5/110	710,3598,7009,10039,11213	SERPING1,IL13RA2,TMBIM6,PARP3,IRAK3
7_Member	GO Biological Processes	GO:0002252	immune effector process	-2.40551	-0.0851955	13/656	710,717,1776,3598,7009,7805,10039,11213,51704,54518,135250,284021,353091	SERPING1,C2,DNASE1L3,IL13RA2,TMBIM6,LAPTM5,PARP3,IRAK3,GPRC5B,APBB1IP,RAET1E,MILR1,RAET1G
7_Member	GO Biological Processes	GO:0050866	negative regulation of cell activation	-2.04895	0	6/210	2852,3598,7056,7805,10039,284021	GPER1,IL13RA2,THBD,LAPTM5,PARP3,MILR1
7_Member	GO Biological Processes	GO:0050865	regulation of cell activation	-2.02689	0	12/650	825,2852,3479,3574,3598,7056,7805,10039,27240,30011,56603,284021	CAPN3,GPER1,IGF1,IL7,IL13RA2,THBD,LAPTM5,PARP3,SIT1,SH3KBP1,CYP26B1,MILR1
8_Summary	GO Biological Processes	GO:0051272	positive regulation of cellular component movement	-3.7706	-0.453527	15/594	102,1901,2660,2852,3479,3676,3791,6615,7060,9638,10344,10507,131578,152007,158747,6935,7056,51704,135250,353091,56477,80270,4756,5355	ADAM10,S1PR1,MSTN,GPER1,IGF1,ITGA4,KDR,SNAI1,THBS4,FEZ1,CCL26,SEMA4D,LRRC15,GLIPR2,MOSPD2,ZEB1,THBD,GPRC5B,RAET1E,RAET1G,CCL28,HSD3B7,NEO1,PLP2
8_Member	GO Biological Processes	GO:0051272	positive regulation of cellular component movement	-3.7706	-0.453527	15/594	102,1901,2660,2852,3479,3676,3791,6615,7060,9638,10344,10507,131578,152007,158747	ADAM10,S1PR1,MSTN,GPER1,IGF1,ITGA4,KDR,SNAI1,THBS4,FEZ1,CCL26,SEMA4D,LRRC15,GLIPR2,MOSPD2
8_Member	GO Biological Processes	GO:0050921	positive regulation of chemotaxis	-3.70129	-0.453527	7/141	102,1901,2660,3791,7060,10344,158747	ADAM10,S1PR1,MSTN,KDR,THBS4,CCL26,MOSPD2
8_Member	GO Biological Processes	GO:0030335	positive regulation of cell migration	-3.54196	-0.416246	14/556	102,1901,2660,2852,3479,3676,3791,6615,7060,10344,10507,131578,152007,158747	ADAM10,S1PR1,MSTN,GPER1,IGF1,ITGA4,KDR,SNAI1,THBS4,CCL26,SEMA4D,LRRC15,GLIPR2,MOSPD2
8_Member	GO Biological Processes	GO:2000147	positive regulation of cell motility	-3.34416	-0.400758	14/582	102,1901,2660,2852,3479,3676,3791,6615,7060,10344,10507,131578,152007,158747	ADAM10,S1PR1,MSTN,GPER1,IGF1,ITGA4,KDR,SNAI1,THBS4,CCL26,SEMA4D,LRRC15,GLIPR2,MOSPD2
8_Member	GO Biological Processes	GO:0040017	positive regulation of locomotion	-3.24284	-0.371686	14/596	102,1901,2660,2852,3479,3676,3791,6615,7060,10344,10507,131578,152007,158747	ADAM10,S1PR1,MSTN,GPER1,IGF1,ITGA4,KDR,SNAI1,THBS4,CCL26,SEMA4D,LRRC15,GLIPR2,MOSPD2
8_Member	WikiPathways	WP516	Hypertrophy model	-3.21923	-0.362676	3/20	102,2660,6935	ADAM10,MSTN,ZEB1
8_Member	GO Biological Processes	GO:0050920	regulation of chemotaxis	-3.18467	-0.361478	8/224	102,1901,2660,3791,7060,10344,10507,158747	ADAM10,S1PR1,MSTN,KDR,THBS4,CCL26,SEMA4D,MOSPD2
8_Member	GO Biological Processes	GO:0032103	positive regulation of response to external stimulus	-2.97476	-0.263328	11/427	102,1901,2660,3791,7056,7060,10344,51704,135250,158747,353091	ADAM10,S1PR1,MSTN,KDR,THBD,THBS4,CCL26,GPRC5B,RAET1E,MOSPD2,RAET1G
8_Member	GO Biological Processes	GO:0060326	cell chemotaxis	-2.85822	-0.250595	9/312	102,1901,2660,3791,7060,10344,56477,80270,158747	ADAM10,S1PR1,MSTN,KDR,THBS4,CCL26,CCL28,HSD3B7,MOSPD2
8_Member	GO Biological Processes	GO:0071674	mononuclear cell migration	-2.85008	-0.250595	7/196	102,1901,2660,3676,10344,80270,158747	ADAM10,S1PR1,MSTN,ITGA4,CCL26,HSD3B7,MOSPD2
8_Member	GO Biological Processes	GO:0006935	chemotaxis	-2.6922	-0.22752	13/607	102,1901,2660,3791,4756,5355,7060,9638,10344,10507,56477,80270,158747	ADAM10,S1PR1,MSTN,KDR,NEO1,PLP2,THBS4,FEZ1,CCL26,SEMA4D,CCL28,HSD3B7,MOSPD2
8_Member	GO Biological Processes	GO:0042330	taxis	-2.67363	-0.215016	13/610	102,1901,2660,3791,4756,5355,7060,9638,10344,10507,56477,80270,158747	ADAM10,S1PR1,MSTN,KDR,NEO1,PLP2,THBS4,FEZ1,CCL26,SEMA4D,CCL28,HSD3B7,MOSPD2
8_Member	GO Biological Processes	GO:0072678	T cell migration	-2.63017	-0.192743	4/66	102,1901,3676,10344	ADAM10,S1PR1,ITGA4,CCL26
8_Member	GO Biological Processes	GO:0072676	lymphocyte migration	-2.50039	-0.130918	5/117	102,1901,3676,10344,80270	ADAM10,S1PR1,ITGA4,CCL26,HSD3B7
8_Member	GO Biological Processes	GO:0030595	leukocyte chemotaxis	-2.4399	-0.0952288	7/232	102,1901,2660,7060,10344,80270,158747	ADAM10,S1PR1,MSTN,THBS4,CCL26,HSD3B7,MOSPD2
8_Member	GO Biological Processes	GO:0050900	leukocyte migration	-2.34934	-0.0581252	9/372	102,1901,2660,3676,7060,10344,56477,80270,158747	ADAM10,S1PR1,MSTN,ITGA4,THBS4,CCL26,CCL28,HSD3B7,MOSPD2
8_Member	GO Biological Processes	GO:0002687	positive regulation of leukocyte migration	-2.23723	-0.0212523	5/135	102,2660,3676,7060,158747	ADAM10,MSTN,ITGA4,THBS4,MOSPD2
8_Member	GO Biological Processes	GO:0002690	positive regulation of leukocyte chemotaxis	-2.08286	0	4/94	102,2660,7060,158747	ADAM10,MSTN,THBS4,MOSPD2
8_Member	GO Biological Processes	GO:0071622	regulation of granulocyte chemotaxis	-2.04065	0	3/51	2660,7060,158747	MSTN,THBS4,MOSPD2
8_Member	GO Biological Processes	GO:0002685	regulation of leukocyte migration	-2.02991	0	6/212	102,2660,3676,7060,56477,158747	ADAM10,MSTN,ITGA4,THBS4,CCL28,MOSPD2
9_Summary	GO Biological Processes	GO:1901615	organic hydroxy compound metabolic process	-3.72822	-0.453527	14/533	89,220,1646,2852,3479,4128,5028,6615,7849,8029,8611,10558,56603,80270,1962,2110,5166,5565,51703,284273,56952,79611,114899	ACTN3,ALDH1A3,AKR1C2,GPER1,IGF1,MAOA,P2RY1,SNAI1,PAX8,CUBN,PLPP1,SPTLC1,CYP26B1,HSD3B7,EHHADH,ETFDH,PDK4,PRKAB2,ACSL5,ZADH2,PRTFDC1,ACSS3,C1QTNF3
9_Member	GO Biological Processes	GO:1901615	organic hydroxy compound metabolic process	-3.72822	-0.453527	14/533	89,220,1646,2852,3479,4128,5028,6615,7849,8029,8611,10558,56603,80270	ACTN3,ALDH1A3,AKR1C2,GPER1,IGF1,MAOA,P2RY1,SNAI1,PAX8,CUBN,PLPP1,SPTLC1,CYP26B1,HSD3B7
9_Member	GO Biological Processes	GO:0032787	monocarboxylic acid metabolic process	-2.31812	-0.0551977	12/595	89,220,1646,1962,2110,3479,5166,5565,51703,56603,80270,284273	ACTN3,ALDH1A3,AKR1C2,EHHADH,ETFDH,IGF1,PDK4,PRKAB2,ACSL5,CYP26B1,HSD3B7,ZADH2
9_Member	GO Biological Processes	GO:0044283	small molecule biosynthetic process	-2.11814	0	11/554	220,2852,5028,5166,5565,6615,10558,56952,79611,80270,114899	ALDH1A3,GPER1,P2RY1,PDK4,PRKAB2,SNAI1,SPTLC1,PRTFDC1,ACSS3,HSD3B7,C1QTNF3
9_Member	GO Biological Processes	GO:0006066	alcohol metabolic process	-2.00958	0	8/349	220,1646,2852,3479,5028,8029,8611,10558	ALDH1A3,AKR1C2,GPER1,IGF1,P2RY1,CUBN,PLPP1,SPTLC1
10_Summary	Canonical Pathways	M5885	NABA MATRISOME ASSOCIATED	-3.63711	-0.422832	17/751	102,710,2660,3479,3574,4313,5271,5654,6423,9976,10344,10507,56477,114899,135228,160364,283208,2852,7056,11213,23621	ADAM10,SERPING1,MSTN,IGF1,IL7,MMP2,SERPINB8,HTRA1,SFRP2,CLEC2B,CCL26,SEMA4D,CCL28,C1QTNF3,CD109,CLEC12A,P4HA3,GPER1,THBD,IRAK3,BACE1
10_Member	Canonical Pathways	M5885	NABA MATRISOME ASSOCIATED	-3.63711	-0.422832	17/751	102,710,2660,3479,3574,4313,5271,5654,6423,9976,10344,10507,56477,114899,135228,160364,283208	ADAM10,SERPING1,MSTN,IGF1,IL7,MMP2,SERPINB8,HTRA1,SFRP2,CLEC2B,CCL26,SEMA4D,CCL28,C1QTNF3,CD109,CLEC12A,P4HA3
10_Member	GO Biological Processes	GO:0032102	negative regulation of response to external stimulus	-2.51253	-0.130918	10/419	710,2852,3479,5654,7056,10507,11213,23621,114899,135228	SERPING1,GPER1,IGF1,HTRA1,THBD,SEMA4D,IRAK3,BACE1,C1QTNF3,CD109
10_Member	Canonical Pathways	M3468	NABA ECM REGULATORS	-2.37953	-0.0747233	7/238	102,710,4313,5271,5654,135228,283208	ADAM10,SERPING1,MMP2,SERPINB8,HTRA1,CD109,P4HA3
11_Summary	GO Biological Processes	GO:0010675	regulation of cellular carbohydrate metabolic process	-3.60845	-0.422832	7/146	89,2852,3479,5028,5166,11266,114899,10507,6423,10006,56603,133308,978,6615,3791,10344,152007,222166,2595,2138,4313,7045,2308,7805,11213,220164,255082,102,825,3574,80243	ACTN3,GPER1,IGF1,P2RY1,PDK4,DUSP12,C1QTNF3,SEMA4D,SFRP2,ABI1,CYP26B1,SLC9B2,CDA,SNAI1,KDR,CCL26,GLIPR2,MTURN,GANC,EYA1,MMP2,TGFBI,FOXO1,LAPTM5,IRAK3,DOK6,CASC2,ADAM10,CAPN3,IL7,PREX2
11_Member	GO Biological Processes	GO:0010675	regulation of cellular carbohydrate metabolic process	-3.60845	-0.422832	7/146	89,2852,3479,5028,5166,11266,114899	ACTN3,GPER1,IGF1,P2RY1,PDK4,DUSP12,C1QTNF3
11_Member	GO Biological Processes	GO:0006109	regulation of carbohydrate metabolic process	-3.09266	-0.310731	7/178	89,2852,3479,5028,5166,11266,114899	ACTN3,GPER1,IGF1,P2RY1,PDK4,DUSP12,C1QTNF3
11_Member	GO Biological Processes	GO:0043931	ossification involved in bone maturation	-3.03601	-0.287084	3/23	89,3479,10507	ACTN3,IGF1,SEMA4D
11_Member	GO Biological Processes	GO:0010676	positive regulation of cellular carbohydrate metabolic process	-2.92385	-0.263328	4/55	89,2852,3479,5028	ACTN3,GPER1,IGF1,P2RY1
11_Member	GO Biological Processes	GO:0070977	bone maturation	-2.87733	-0.250595	3/26	89,3479,10507	ACTN3,IGF1,SEMA4D
11_Member	GO Biological Processes	GO:0060348	bone development	-2.72704	-0.232491	7/206	89,3479,6423,10006,10507,56603,133308	ACTN3,IGF1,SFRP2,ABI1,SEMA4D,CYP26B1,SLC9B2
11_Member	GO Biological Processes	GO:0048799	animal organ maturation	-2.69454	-0.22752	3/30	89,3479,10507	ACTN3,IGF1,SEMA4D
11_Member	GO Biological Processes	GO:0062012	regulation of small molecule metabolic process	-2.64844	-0.200542	9/335	89,978,2852,3479,5028,5166,6615,11266,114899	ACTN3,CDA,GPER1,IGF1,P2RY1,PDK4,SNAI1,DUSP12,C1QTNF3
11_Member	GO Biological Processes	GO:0070374	positive regulation of ERK1 and ERK2 cascade	-2.55606	-0.143746	7/221	2852,3479,3791,5028,10344,152007,222166	GPER1,IGF1,KDR,P2RY1,CCL26,GLIPR2,MTURN
11_Member	GO Biological Processes	GO:0044262	cellular carbohydrate metabolic process	-2.53398	-0.130918	8/284	89,2595,2852,3479,5028,5166,11266,114899	ACTN3,GANC,GPER1,IGF1,P2RY1,PDK4,DUSP12,C1QTNF3
11_Member	GO Biological Processes	GO:0010906	regulation of glucose metabolic process	-2.4688	-0.119931	5/119	89,3479,5166,11266,114899	ACTN3,IGF1,PDK4,DUSP12,C1QTNF3
11_Member	GO Biological Processes	GO:0045913	positive regulation of carbohydrate metabolic process	-2.42871	-0.0923096	4/75	89,2852,3479,5028	ACTN3,GPER1,IGF1,P2RY1
11_Member	GO Biological Processes	GO:0001501	skeletal system development	-2.39156	-0.0829328	11/508	89,2138,3479,4313,6423,6615,7045,10006,10507,56603,133308	ACTN3,EYA1,IGF1,MMP2,SFRP2,SNAI1,TGFBI,ABI1,SEMA4D,CYP26B1,SLC9B2
11_Member	GO Biological Processes	GO:0014068	positive regulation of phosphatidylinositol 3-kinase signaling	-2.34795	-0.0581252	4/79	2852,3479,3791,10507	GPER1,IGF1,KDR,SEMA4D
11_Member	GO Biological Processes	GO:0051149	positive regulation of muscle cell differentiation	-2.30934	-0.0551977	4/81	89,2852,3479,56603	ACTN3,GPER1,IGF1,CYP26B1
11_Member	GO Biological Processes	GO:0043408	regulation of MAPK cascade	-2.30845	-0.0551977	13/674	2308,2852,3479,3791,5028,6423,7805,10344,11213,152007,220164,222166,255082	FOXO1,GPER1,IGF1,KDR,P2RY1,SFRP2,LAPTM5,CCL26,IRAK3,GLIPR2,DOK6,MTURN,CASC2
11_Member	GO Biological Processes	GO:0006140	regulation of nucleotide metabolic process	-2.21748	-0.0210526	4/86	89,978,3479,5166	ACTN3,CDA,IGF1,PDK4
11_Member	GO Biological Processes	GO:0045927	positive regulation of growth	-2.18309	0	7/259	89,102,825,3479,3574,6423,10507	ACTN3,ADAM10,CAPN3,IGF1,IL7,SFRP2,SEMA4D
11_Member	GO Biological Processes	GO:0014065	phosphatidylinositol 3-kinase signaling	-2.14626	0	5/142	2852,3479,3791,10507,80243	GPER1,IGF1,KDR,SEMA4D,PREX2
11_Member	GO Biological Processes	GO:0043255	regulation of carbohydrate biosynthetic process	-2.03585	0	4/97	2852,3479,5028,114899	GPER1,IGF1,P2RY1,C1QTNF3
12_Summary	GO Biological Processes	GO:0042987	amyloid precursor protein catabolic process	-3.56218	-0.416246	5/68	102,2280,3479,23621,54103,3676,4313,81502	ADAM10,FKBP1A,IGF1,BACE1,GSAP,ITGA4,MMP2,HM13
12_Member	GO Biological Processes	GO:0042987	amyloid precursor protein catabolic process	-3.56218	-0.416246	5/68	102,2280,3479,23621,54103	ADAM10,FKBP1A,IGF1,BACE1,GSAP
12_Member	GO Biological Processes	GO:0042982	amyloid precursor protein metabolic process	-2.89693	-0.251224	5/95	102,2280,3479,23621,54103	ADAM10,FKBP1A,IGF1,BACE1,GSAP
12_Member	GO Biological Processes	GO:0034205	amyloid-beta formation	-2.86576	-0.250595	4/57	102,3479,23621,54103	ADAM10,IGF1,BACE1,GSAP
12_Member	GO Biological Processes	GO:1904645	response to amyloid-beta	-2.80992	-0.240604	4/59	3479,3676,4313,23621	IGF1,ITGA4,MMP2,BACE1
12_Member	GO Biological Processes	GO:0050435	amyloid-beta metabolic process	-2.60628	-0.179065	4/67	102,3479,23621,54103	ADAM10,IGF1,BACE1,GSAP
12_Member	GO Biological Processes	GO:0006509	membrane protein ectodomain proteolysis	-2.16463	0	3/46	102,23621,81502	ADAM10,BACE1,HM13
12_Member	GO Biological Processes	GO:1904646	cellular response to amyloid-beta	-2.11329	0	3/48	3479,3676,23621	IGF1,ITGA4,BACE1
13_Summary	GO Biological Processes	GO:0010934	macrophage cytokine production	-3.43553	-0.416246	3/17	7805,11213,51704,353091	LAPTM5,IRAK3,GPRC5B,RAET1G
13_Member	GO Biological Processes	GO:0010934	macrophage cytokine production	-3.43553	-0.416246	3/17	7805,11213,51704	LAPTM5,IRAK3,GPRC5B
13_Member	GO Biological Processes	GO:0010935	regulation of macrophage cytokine production	-3.43553	-0.416246	3/17	7805,11213,51704	LAPTM5,IRAK3,GPRC5B
13_Member	GO Biological Processes	GO:0061082	myeloid leukocyte cytokine production	-2.73761	-0.232491	3/29	7805,11213,51704	LAPTM5,IRAK3,GPRC5B
13_Member	GO Biological Processes	GO:0002718	regulation of cytokine production involved in immune response	-2.03585	0	4/97	7805,11213,51704,353091	LAPTM5,IRAK3,GPRC5B,RAET1G
13_Member	GO Biological Processes	GO:0002367	cytokine production involved in immune response	-2.02056	0	4/98	7805,11213,51704,353091	LAPTM5,IRAK3,GPRC5B,RAET1G
14_Summary	GO Biological Processes	GO:0090136	epithelial cell-cell adhesion	-3.43553	-0.416246	3/17	5271,7060,144100	SERPINB8,THBS4,PLEKHA7
14_Member	GO Biological Processes	GO:0090136	epithelial cell-cell adhesion	-3.43553	-0.416246	3/17	5271,7060,144100	SERPINB8,THBS4,PLEKHA7
15_Summary	GO Biological Processes	GO:0007204	positive regulation of cytosolic calcium ion concentration	-3.3972	-0.403699	10/319	825,1193,1901,2280,2852,5028,7009,8989,56477,162514,3791,4682,4756,5166,8031,8913,81894,93589,1528,3790,53827,79815,133308	CAPN3,CLIC2,S1PR1,FKBP1A,GPER1,P2RY1,TMBIM6,TRPA1,CCL28,TRPV3,KDR,NUBP1,NEO1,PDK4,NCOA4,CACNA1G,SLC25A28,CACNA2D4,CYB5A,KCNS3,FXYD5,NIPAL2,SLC9B2
15_Member	GO Biological Processes	GO:0007204	positive regulation of cytosolic calcium ion concentration	-3.3972	-0.403699	10/319	825,1193,1901,2280,2852,5028,7009,8989,56477,162514	CAPN3,CLIC2,S1PR1,FKBP1A,GPER1,P2RY1,TMBIM6,TRPA1,CCL28,TRPV3
15_Member	GO Biological Processes	GO:0050801	ion homeostasis	-3.37259	-0.403699	17/792	825,1193,1901,2280,2852,3791,4682,4756,5028,5166,7009,8031,8913,8989,56477,81894,162514	CAPN3,CLIC2,S1PR1,FKBP1A,GPER1,KDR,NUBP1,NEO1,P2RY1,PDK4,TMBIM6,NCOA4,CACNA1G,TRPA1,CCL28,SLC25A28,TRPV3
15_Member	GO Biological Processes	GO:0060402	calcium ion transport into cytosol	-3.36747	-0.403699	7/160	825,1193,2280,2852,7009,8989,162514	CAPN3,CLIC2,FKBP1A,GPER1,TMBIM6,TRPA1,TRPV3
15_Member	GO Biological Processes	GO:0010523	negative regulation of calcium ion transport into cytosol	-3.15498	-0.361478	3/21	1193,2280,7009	CLIC2,FKBP1A,TMBIM6
15_Member	GO Biological Processes	GO:0051480	regulation of cytosolic calcium ion concentration	-3.04918	-0.287084	10/354	825,1193,1901,2280,2852,5028,7009,8989,56477,162514	CAPN3,CLIC2,S1PR1,FKBP1A,GPER1,P2RY1,TMBIM6,TRPA1,CCL28,TRPV3
15_Member	GO Biological Processes	GO:0060401	cytosolic calcium ion transport	-3.0362	-0.287084	7/182	825,1193,2280,2852,7009,8989,162514	CAPN3,CLIC2,FKBP1A,GPER1,TMBIM6,TRPA1,TRPV3
15_Member	GO Biological Processes	GO:0097553	calcium ion transmembrane import into cytosol	-2.88013	-0.250595	6/142	825,1193,2280,2852,8989,162514	CAPN3,CLIC2,FKBP1A,GPER1,TRPA1,TRPV3
15_Member	GO Biological Processes	GO:0055080	cation homeostasis	-2.84365	-0.250595	15/731	825,1193,1901,2280,2852,4682,4756,5028,5166,7009,8031,8989,56477,81894,162514	CAPN3,CLIC2,S1PR1,FKBP1A,GPER1,NUBP1,NEO1,P2RY1,PDK4,TMBIM6,NCOA4,TRPA1,CCL28,SLC25A28,TRPV3
15_Member	GO Biological Processes	GO:0055065	metal ion homeostasis	-2.82697	-0.250595	14/659	825,1193,1901,2280,2852,4682,4756,5028,7009,8031,8989,56477,81894,162514	CAPN3,CLIC2,S1PR1,FKBP1A,GPER1,NUBP1,NEO1,P2RY1,TMBIM6,NCOA4,TRPA1,CCL28,SLC25A28,TRPV3
15_Member	GO Biological Processes	GO:0098771	inorganic ion homeostasis	-2.76372	-0.233329	15/745	825,1193,1901,2280,2852,4682,4756,5028,5166,7009,8031,8989,56477,81894,162514	CAPN3,CLIC2,S1PR1,FKBP1A,GPER1,NUBP1,NEO1,P2RY1,PDK4,TMBIM6,NCOA4,TRPA1,CCL28,SLC25A28,TRPV3
15_Member	GO Biological Processes	GO:0010522	regulation of calcium ion transport into cytosol	-2.7599	-0.233329	5/102	825,1193,2280,2852,7009	CAPN3,CLIC2,FKBP1A,GPER1,TMBIM6
15_Member	GO Biological Processes	GO:0051209	release of sequestered calcium ion into cytosol	-2.53263	-0.130918	5/115	825,1193,2280,2852,8989	CAPN3,CLIC2,FKBP1A,GPER1,TRPA1
15_Member	GO Biological Processes	GO:0051283	negative regulation of sequestering of calcium ion	-2.51643	-0.130918	5/116	825,1193,2280,2852,8989	CAPN3,CLIC2,FKBP1A,GPER1,TRPA1
15_Member	GO Biological Processes	GO:0051282	regulation of sequestering of calcium ion	-2.48452	-0.127128	5/118	825,1193,2280,2852,8989	CAPN3,CLIC2,FKBP1A,GPER1,TRPA1
15_Member	GO Biological Processes	GO:0051208	sequestering of calcium ion	-2.4226	-0.0902787	5/122	825,1193,2280,2852,8989	CAPN3,CLIC2,FKBP1A,GPER1,TRPA1
15_Member	GO Biological Processes	GO:0006875	cellular metal ion homeostasis	-2.39322	-0.0829328	12/582	825,1193,1901,2280,2852,4682,5028,7009,8031,8989,56477,162514	CAPN3,CLIC2,S1PR1,FKBP1A,GPER1,NUBP1,P2RY1,TMBIM6,NCOA4,TRPA1,CCL28,TRPV3
15_Member	GO Biological Processes	GO:0051279	regulation of release of sequestered calcium ion into cytosol	-2.34795	-0.0581252	4/79	825,1193,2280,2852	CAPN3,CLIC2,FKBP1A,GPER1
15_Member	GO Biological Processes	GO:0006874	cellular calcium ion homeostasis	-2.30296	-0.0551977	10/449	825,1193,1901,2280,2852,5028,7009,8989,56477,162514	CAPN3,CLIC2,S1PR1,FKBP1A,GPER1,P2RY1,TMBIM6,TRPA1,CCL28,TRPV3
15_Member	GO Biological Processes	GO:0070588	calcium ion transmembrane transport	-2.2896	-0.0517471	8/312	825,1193,2280,2852,8913,8989,93589,162514	CAPN3,CLIC2,FKBP1A,GPER1,CACNA1G,TRPA1,CACNA2D4,TRPV3
15_Member	GO Biological Processes	GO:0055074	calcium ion homeostasis	-2.22478	-0.0210526	10/461	825,1193,1901,2280,2852,5028,7009,8989,56477,162514	CAPN3,CLIC2,S1PR1,FKBP1A,GPER1,P2RY1,TMBIM6,TRPA1,CCL28,TRPV3
15_Member	GO Biological Processes	GO:0098662	inorganic cation transmembrane transport	-2.09138	0	14/799	825,1193,1528,2280,2852,3790,8913,8989,53827,79815,81894,93589,133308,162514	CAPN3,CLIC2,CYB5A,FKBP1A,GPER1,KCNS3,CACNA1G,TRPA1,FXYD5,NIPAL2,SLC25A28,CACNA2D4,SLC9B2,TRPV3
15_Member	GO Biological Processes	GO:0072503	cellular divalent inorganic cation homeostasis	-2.06536	0	10/487	825,1193,1901,2280,2852,5028,7009,8989,56477,162514	CAPN3,CLIC2,S1PR1,FKBP1A,GPER1,P2RY1,TMBIM6,TRPA1,CCL28,TRPV3
15_Member	GO Biological Processes	GO:0030003	cellular cation homeostasis	-2.02689	0	12/650	825,1193,1901,2280,2852,4682,5028,7009,8031,8989,56477,162514	CAPN3,CLIC2,S1PR1,FKBP1A,GPER1,NUBP1,P2RY1,TMBIM6,NCOA4,TRPA1,CCL28,TRPV3
15_Member	GO Biological Processes	GO:0006816	calcium ion transport	-2.00631	0	9/422	825,1193,2280,2852,7009,8913,8989,93589,162514	CAPN3,CLIC2,FKBP1A,GPER1,TMBIM6,CACNA1G,TRPA1,CACNA2D4,TRPV3
16_Summary	GO Biological Processes	GO:0061383	trabecula morphogenesis	-3.3311	-0.400758	4/43	1901,2280,4313,10507,143,2530,3676	S1PR1,FKBP1A,MMP2,SEMA4D,PARP4,FUT8,ITGA4
16_Member	GO Biological Processes	GO:0061383	trabecula morphogenesis	-3.3311	-0.400758	4/43	1901,2280,4313,10507	S1PR1,FKBP1A,MMP2,SEMA4D
16_Member	Reactome Gene Sets	R-HSA-9679506	SARS-CoV Infections	-2.03716	0	5/151	143,1901,2280,2530,3676	PARP4,S1PR1,FKBP1A,FUT8,ITGA4
17_Summary	GO Biological Processes	GO:0001704	formation of primary germ layer	-3.24203	-0.371686	6/121	2138,3676,4313,6423,6615,123169	EYA1,ITGA4,MMP2,SFRP2,SNAI1,LEO1
17_Member	GO Biological Processes	GO:0001704	formation of primary germ layer	-3.24203	-0.371686	6/121	2138,3676,4313,6423,6615,123169	EYA1,ITGA4,MMP2,SFRP2,SNAI1,LEO1
17_Member	GO Biological Processes	GO:0060795	cell fate commitment involved in formation of primary germ layer	-2.65302	-0.200542	3/31	2138,6423,123169	EYA1,SFRP2,LEO1
17_Member	GO Biological Processes	GO:0007369	gastrulation	-2.29767	-0.0551957	6/186	2138,3676,4313,6423,6615,123169	EYA1,ITGA4,MMP2,SFRP2,SNAI1,LEO1
17_Member	GO Biological Processes	GO:0035987	endodermal cell differentiation	-2.19125	-0.00273059	3/45	3676,4313,123169	ITGA4,MMP2,LEO1
18_Summary	KEGG Pathway	hsa05410	Hypertrophic cardiomyopathy (HCM)	-3.16163	-0.361478	5/83	3479,3676,5565,6445,93589,89	IGF1,ITGA4,PRKAB2,SGCG,CACNA2D4,ACTN3
18_Member	KEGG Pathway	hsa05410	Hypertrophic cardiomyopathy (HCM)	-3.16163	-0.361478	5/83	3479,3676,5565,6445,93589	IGF1,ITGA4,PRKAB2,SGCG,CACNA2D4
18_Member	KEGG Pathway	ko05410	Hypertrophic cardiomyopathy (HCM)	-3.16163	-0.361478	5/83	3479,3676,5565,6445,93589	IGF1,ITGA4,PRKAB2,SGCG,CACNA2D4
18_Member	KEGG Pathway	hsa05412	Arrhythmogenic right ventricular cardiomyopathy (ARVC)	-2.49263	-0.130918	4/72	89,3676,6445,93589	ACTN3,ITGA4,SGCG,CACNA2D4
18_Member	KEGG Pathway	ko05412	Arrhythmogenic right ventricular cardiomyopathy (ARVC)	-2.49263	-0.130918	4/72	89,3676,6445,93589	ACTN3,ITGA4,SGCG,CACNA2D4
18_Member	WikiPathways	WP2118	Arrhythmogenic right ventricular cardiomyopathy	-2.40806	-0.0851955	4/76	89,3676,6445,93589	ACTN3,ITGA4,SGCG,CACNA2D4
18_Member	KEGG Pathway	hsa05414	Dilated cardiomyopathy	-2.1484	0	4/90	3479,3676,6445,93589	IGF1,ITGA4,SGCG,CACNA2D4
18_Member	KEGG Pathway	ko05414	Dilated cardiomyopathy	-2.1484	0	4/90	3479,3676,6445,93589	IGF1,ITGA4,SGCG,CACNA2D4
19_Summary	KEGG Pathway	hsa00340	Histidine metabolism	-2.98071	-0.263328	3/24	220,443,4128,2308,8863	ALDH1A3,ASPA,MAOA,FOXO1,PER3
19_Member	KEGG Pathway	hsa00340	Histidine metabolism	-2.98071	-0.263328	3/24	220,443,4128	ALDH1A3,ASPA,MAOA
19_Member	KEGG Pathway	ko00340	Histidine metabolism	-2.98071	-0.263328	3/24	220,443,4128	ALDH1A3,ASPA,MAOA
19_Member	WikiPathways	WP3298	Melatonin metabolism and effects	-2.27528	-0.0419255	3/42	2308,4128,8863	FOXO1,MAOA,PER3
20_Summary	GO Biological Processes	GO:1901655	cellular response to ketone	-2.91747	-0.263328	5/94	1646,2308,2660,8031,54331,366,1176,2852,3479,3676,4313,5028,5166,7431,23621,5244,5241,8611,56603	AKR1C2,FOXO1,MSTN,NCOA4,GNG2,AQP9,AP3S1,GPER1,IGF1,ITGA4,MMP2,P2RY1,PDK4,VIM,BACE1,ABCB4,PGR,PLPP1,CYP26B1
20_Member	GO Biological Processes	GO:1901655	cellular response to ketone	-2.91747	-0.263328	5/94	1646,2308,2660,8031,54331	AKR1C2,FOXO1,MSTN,NCOA4,GNG2
20_Member	GO Biological Processes	GO:0071417	cellular response to organonitrogen compound	-2.51262	-0.130918	13/637	366,1176,2308,2660,2852,3479,3676,4313,5028,5166,7431,23621,54331	AQP9,AP3S1,FOXO1,MSTN,GPER1,IGF1,ITGA4,MMP2,P2RY1,PDK4,VIM,BACE1,GNG2
20_Member	GO Biological Processes	GO:1901653	cellular response to peptide	-2.41816	-0.089875	9/363	1176,2308,2660,2852,3479,3676,5166,7431,23621	AP3S1,FOXO1,MSTN,GPER1,IGF1,ITGA4,PDK4,VIM,BACE1
20_Member	GO Biological Processes	GO:1901654	response to ketone	-2.23175	-0.0212523	6/192	1646,2308,2660,5244,8031,54331	AKR1C2,FOXO1,MSTN,ABCB4,NCOA4,GNG2
20_Member	GO Biological Processes	GO:1901699	cellular response to nitrogen compound	-2.21544	-0.0210526	13/692	366,1176,2308,2660,2852,3479,3676,4313,5028,5166,7431,23621,54331	AQP9,AP3S1,FOXO1,MSTN,GPER1,IGF1,ITGA4,MMP2,P2RY1,PDK4,VIM,BACE1,GNG2
20_Member	GO Biological Processes	GO:0071383	cellular response to steroid hormone stimulus	-2.10754	0	6/204	2308,2660,2852,5241,8031,8611	FOXO1,MSTN,GPER1,PGR,NCOA4,PLPP1
20_Member	GO Biological Processes	GO:0071396	cellular response to lipid	-2.0047	0	11/575	1646,2308,2660,2852,5166,5241,5244,7431,8031,8611,56603	AKR1C2,FOXO1,MSTN,GPER1,PDK4,PGR,ABCB4,VIM,NCOA4,PLPP1,CYP26B1
