# Supplementary material for: Transcriptional profiling of Hutchinson-Gilford Progeria syndrome fibroblasts reveals deficits in mesenchymal stem cell commitment to differentiation related to early events in endochondral ossification
Source: eLife journal article supplement (doi:10.7554/elife.81290), 2022-12-29
Supplement: table1-data1 [file metascape_result.xlsx]

## Sheet: Annotation
MyList	Gene ID	Type	Tax ID	Homologene Gene ID	Homologene Gene Tax ID	Gene Symbol	Description	Biological Process (GO)	Kinase Class (UniProt)	Protein Function (Protein Atlas)	Subcellular Location (Protein Atlas)	Drug (DrugBank)	Canonical Pathways	Hallmark Gene Sets	R-HSA-3214815 HDACs deacetylate histones	GO:0045814 negative regulation of gene ex	GO:0060968 regulation of gene silencing	R-HSA-2559584 Formation of Senescence-Associ	GO:0048729 tissue morphogenesis	GO:0070848 response to growth factor	GO:0051056 regulation of small GTPase med	GO:0007423 sensory organ development	GO:0030155 regulation of cell adhesion	R-HSA-8866654 E3 ubiquitin ligases ubiquitin	GO:0048514 blood vessel morphogenesis	GO:0000904 cell morphogenesis involved in	GO:0003151 outflow tract morphogenesis	GO:0060485 mesenchyme development	GO:0007169 transmembrane receptor protein	WP2840 Hair follicle development: cyt	GO:0070100 negative regulation of chemoki	ko04261 Adrenergic signaling in cardio	GO:0048839 inner ear development	GO:0050673 epithelial cell proliferation
ABI3BP	25890	symbol	H. sapiens	25890	H. sapiens	ABI3BP	ABI family member 3 binding protein			Predicted intracellular proteins; Predicted secreted proteins; Disease related genes			(M3008)NABA ECM GLYCOPROTEINS; (M5884)NABA CORE MATRISOME; (M5889)NABA MATRISOME	(M5930)HALLMARK EPITHELIAL MESENCHYMAL TRANSITION	0.0	0.0	0.0	0.0	0.0	0.0	0.0	0.0	0.0	0.0	0.0	0.0	0.0	0.0	0.0	0.0	0.0	0.0	0.0	0.0
ACVR1C	130399	symbol	H. sapiens	130399	H. sapiens	ACVR1C	activin A receptor type 1C	GO:1901383 negative regulation of chorionic trophoblast cell proliferation;GO:0001834 trophectodermal cell proliferation;GO:0097360 chorionic trophoblast cell proliferation	TKL Ser/Thr protein kinase family	ENZYME proteins:Transferases; Predicted intracellular proteins; Enzymes; Kinases:TKL Ser/Thr protein kinases					0.0	0.0	0.0	0.0	1.0	1.0	0.0	0.0	0.0	0.0	1.0	0.0	0.0	0.0	0.0	0.0	0.0	0.0	0.0	0.0
ADAMTS7	11173	symbol	H. sapiens	11173	H. sapiens	ADAMTS7	ADAM metallopeptidase with thrombospondin type 1 motif 7	GO:0032331 negative regulation of chondrocyte differentiation;GO:0061037 negative regulation of cartilage development;GO:0032330 regulation of chondrocyte differentiation		Predicted secreted proteins	Vesicles (Supported)		(M3468)NABA ECM REGULATORS; (M5885)NABA MATRISOME ASSOCIATED; (M5889)NABA MATRISOME		1.0	0.0	0.0	0.0	0.0	1.0	0.0	0.0	0.0	0.0	0.0	0.0	0.0	0.0	0.0	0.0	0.0	0.0	0.0	0.0
ADAMTS8	11095	symbol	H. sapiens	11095	H. sapiens	ADAMTS8	ADAM metallopeptidase with thrombospondin type 1 motif 8	GO:0035435 phosphate ion transmembrane transport;GO:0006817 phosphate ion transport;GO:0098661 inorganic anion transmembrane transport		Cancer-related genes:Candidate cancer biomarkers; Predicted secreted proteins			(M3468)NABA ECM REGULATORS; (M5885)NABA MATRISOME ASSOCIATED; (M5889)NABA MATRISOME		0.0	0.0	0.0	0.0	0.0	0.0	0.0	0.0	0.0	0.0	0.0	0.0	0.0	0.0	0.0	0.0	0.0	0.0	0.0	0.0
ADCY6	112	symbol	H. sapiens	112	H. sapiens	ADCY6	adenylate cyclase 6	GO:1904116 response to vasopressin;GO:1904117 cellular response to vasopressin;GO:0035811 negative regulation of urine volume		ENZYME proteins:Lyases; Predicted intracellular proteins; Enzymes; Disease related genes; Potential drug targets	Golgi apparatus (Approved)		(M56)PID LPA4 PATHWAY; (M8)PID ENDOTHELIN PATHWAY; (M15)PID LYSOPHOSPHOLIPID PATHWAY	(M5898)HALLMARK DNA REPAIR; (M5905)HALLMARK ADIPOGENESIS	0.0	0.0	0.0	0.0	0.0	0.0	0.0	0.0	0.0	0.0	0.0	1.0	0.0	0.0	0.0	0.0	0.0	1.0	0.0	0.0
ADGRL2	23266	symbol	H. sapiens	23266	H. sapiens	ADGRL2	adhesion G protein-coupled receptor L2	GO:0051965 positive regulation of synapse assembly;GO:0051963 regulation of synapse assembly;GO:1901890 positive regulation of cell junction assembly		G-protein coupled receptors:GPCRs excl olfactory receptors; G-protein coupled receptors:Family 2 (B) receptors	Cell Junctions;Plasma membrane (Approved)			(M5942)HALLMARK UV RESPONSE DN	0.0	0.0	0.0	0.0	0.0	0.0	0.0	0.0	0.0	0.0	0.0	1.0	0.0	0.0	0.0	0.0	0.0	1.0	0.0	0.0
AEN	64782	symbol	H. sapiens	64782	H. sapiens	AEN	apoptosis enhancing nuclease	GO:0042771 intrinsic apoptotic signaling pathway in response to DNA damage by p53 class mediator;GO:0072332 intrinsic apoptotic signaling pathway by p53 class mediator;GO:0008630 intrinsic apoptotic signaling pathway in response to DNA damage		Predicted intracellular proteins	Nucleoli;Nucleoplasm (Supported); Additional: Nuclear membrane		(M256)PID TAP63 PATHWAY; (M19)PID P73PATHWAY	(M5939)HALLMARK P53 PATHWAY	0.0	0.0	0.0	0.0	0.0	0.0	0.0	0.0	0.0	1.0	0.0	0.0	0.0	0.0	0.0	0.0	0.0	0.0	0.0	0.0
AFAP1	60312	symbol	H. sapiens	60312	H. sapiens	AFAP1	actin filament associated protein 1	GO:0051493 regulation of cytoskeleton organization;GO:0033043 regulation of organelle organization;GO:0007010 cytoskeleton organization		Predicted intracellular proteins	Actin filaments;Cytosol (Supported); Additional: Focal adhesion sites				0.0	0.0	0.0	0.0	0.0	0.0	0.0	0.0	0.0	0.0	0.0	0.0	0.0	0.0	0.0	0.0	0.0	0.0	0.0	0.0
AFF3	3899	symbol	H. sapiens	3899	H. sapiens	AFF3	AF4/FMR2 family member 3	GO:0035116 embryonic hindlimb morphogenesis;GO:0035137 hindlimb morphogenesis;GO:0030326 embryonic limb morphogenesis		Predicted intracellular proteins; Cancer-related genes	Nucleoplasm (Supported); Additional: Cytosol				0.0	0.0	0.0	0.0	1.0	0.0	0.0	0.0	0.0	0.0	0.0	0.0	1.0	0.0	0.0	0.0	0.0	0.0	0.0	0.0
AGTR1	185	symbol	H. sapiens	185	H. sapiens	AGTR1	angiotensin II receptor type 1	GO:0086097 phospholipase C-activating angiotensin-activated signaling pathway;GO:0002018 renin-angiotensin regulation of aldosterone production;GO:0002034 maintenance of blood vessel diameter homeostasis by renin-angiotensin		FDA approved drug targets:Small molecule drugs; G-protein coupled receptors:GPCRs excl olfactory receptors; Transporters; Disease related genes	Vesicles (Uncertain)	Valsartan; Olmesartan; Losartan; Candesartan cilexetil; Eprosartan; Telmisartan; Irbesartan; Forasartan; Saprisartan; Tasosartan; CYT006-AngQb; Azilsartan medoxomil; Fimasartan; Angiotensin II; Candesartan	(M86)PID ARF6 PATHWAY; (M67)PID ARF6 TRAFFICKING PATHWAY; (M92)PID ANGIOPOIETIN RECEPTOR PATHWAY		0.0	0.0	0.0	0.0	0.0	0.0	1.0	0.0	0.0	0.0	1.0	1.0	0.0	0.0	0.0	0.0	0.0	1.0	0.0	1.0
ANKRD1	27063	symbol	H. sapiens	27063	H. sapiens	ANKRD1	ankyrin repeat domain 1	GO:0043517 positive regulation of DNA damage response, signal transduction by p53 class mediator;GO:0035994 response to muscle stretch;GO:1901798 positive regulation of signal transduction by p53 class mediator		Predicted intracellular proteins; Disease related genes	Nucleoli fibrillar center (Approved); Additional: Nucleoplasm				0.0	0.0	0.0	1.0	1.0	1.0	0.0	0.0	0.0	0.0	0.0	1.0	1.0	1.0	0.0	0.0	0.0	0.0	0.0	0.0
ANKRD30BL	554226	symbol	H. sapiens	554226	H. sapiens	ANKRD30BL	ankyrin repeat domain 30B like			Predicted intracellular proteins					0.0	0.0	0.0	0.0	0.0	0.0	0.0	0.0	0.0	0.0	0.0	0.0	0.0	0.0	0.0	0.0	0.0	0.0	0.0	0.0
ARHGEF28	64283	symbol	H. sapiens	64283	H. sapiens	ARHGEF28	Rho guanine nucleotide exchange factor 28	GO:0048013 ephrin receptor signaling pathway;GO:0035023 regulation of Rho protein signal transduction;GO:0007266 Rho protein signal transduction		Predicted intracellular proteins	Cytosol;Microtubules (Approved); Additional: Plasma membrane		(M68)PID RHOA REG PATHWAY; (M281)PID FAK PATHWAY		1.0	0.0	0.0	0.0	0.0	0.0	1.0	0.0	0.0	0.0	0.0	1.0	0.0	0.0	1.0	0.0	0.0	0.0	0.0	0.0
ARSJ	79642	symbol	H. sapiens	79642	H. sapiens	ARSJ	arylsulfatase family member J			Predicted intracellular proteins; Predicted secreted proteins	Actin filaments (Enhanced)				0.0	0.0	0.0	0.0	0.0	0.0	0.0	0.0	0.0	0.0	0.0	0.0	0.0	0.0	0.0	0.0	0.0	0.0	0.0	0.0
ATP2B4	493	symbol	H. sapiens	493	H. sapiens	ATP2B4	ATPase plasma membrane Ca2+ transporting 4	GO:0098736 negative regulation of the force of heart contraction;GO:1903248 regulation of citrulline biosynthetic process;GO:1903249 negative regulation of citrulline biosynthetic process		Predicted intracellular proteins; Transporters:Primary Active Transporters; ENZYME proteins:Hydrolases; Enzymes	Plasma membrane (Supported)			(M5942)HALLMARK UV RESPONSE DN; (M5907)HALLMARK ESTROGEN RESPONSE LATE	0.0	0.0	1.0	0.0	0.0	1.0	0.0	1.0	0.0	0.0	1.0	1.0	0.0	0.0	0.0	0.0	0.0	1.0	0.0	0.0
ATP8B1	5205	symbol	H. sapiens	5205	H. sapiens	ATP8B1	ATPase phospholipid transporting 8B1	GO:0021650 vestibulocochlear nerve formation;GO:0032534 regulation of microvillus assembly;GO:0006855 drug transmembrane transport		Predicted intracellular proteins; Transporters:Primary Active Transporters; ENZYME proteins:Hydrolases; Enzymes; Disease related genes; Potential drug targets	Cytosol;Plasma membrane (Supported); Additional: Nuclear bodies;Nucleoplasm			(M5916)HALLMARK APICAL SURFACE	0.0	0.0	0.0	0.0	0.0	0.0	0.0	1.0	0.0	0.0	0.0	1.0	0.0	0.0	0.0	0.0	0.0	0.0	1.0	0.0
BCL11A	53335	symbol	H. sapiens	53335	H. sapiens	BCL11A	BAF chromatin remodeling complex subunit BCL11A	GO:1904799 regulation of neuron remodeling;GO:1904800 negative regulation of neuron remodeling;GO:2000173 negative regulation of branching morphogenesis of a nerve		Cancer-related genes:Candidate cancer biomarkers; Transcription factors:Zinc-coordinating DNA-binding domains; Disease related genes; Predicted intracellular proteins	Nucleoplasm (Supported); Additional: Nuclear bodies				1.0	0.0	0.0	0.0	1.0	0.0	0.0	0.0	0.0	0.0	0.0	1.0	0.0	0.0	0.0	0.0	0.0	0.0	0.0	0.0
BLID	414899	symbol	H. sapiens	414899	H. sapiens	BLID	BH3-like motif containing, cell death inducer	GO:0043280 positive regulation of cysteine-type endopeptidase activity involved in apoptotic process;GO:2001056 positive regulation of cysteine-type endopeptidase activity;GO:0010950 positive regulation of endopeptidase activity		Predicted intracellular proteins					0.0	0.0	0.0	0.0	0.0	0.0	0.0	0.0	0.0	0.0	0.0	0.0	0.0	0.0	0.0	0.0	0.0	0.0	0.0	0.0
BMP8B	656	symbol	H. sapiens	656	H. sapiens	BMP8B	bone morphogenetic protein 8b	GO:0010862 positive regulation of pathway-restricted SMAD protein phosphorylation;GO:0060393 regulation of pathway-restricted SMAD protein phosphorylation;GO:0060389 pathway-restricted SMAD protein phosphorylation		Predicted secreted proteins			(M5883)NABA SECRETED FACTORS; (M5885)NABA MATRISOME ASSOCIATED; (M5889)NABA MATRISOME		0.0	0.0	0.0	0.0	0.0	1.0	0.0	0.0	0.0	0.0	0.0	0.0	0.0	0.0	0.0	0.0	0.0	0.0	1.0	0.0
C20orf197	284756	gene_synonym	H. sapiens	284756	H. sapiens	LINC02910	long intergenic non-protein coding RNA 2910								0.0	0.0	0.0	0.0	0.0	0.0	0.0	0.0	0.0	0.0	0.0	0.0	0.0	0.0	0.0	0.0	0.0	0.0	0.0	0.0
CACNA2D1	781	symbol	H. sapiens	781	H. sapiens	CACNA2D1	calcium voltage-gated channel auxiliary subunit alpha2delta 1	GO:0086048 membrane depolarization during bundle of His cell action potential;GO:1901843 positive regulation of high voltage-gated calcium channel activity;GO:0086028 bundle of His cell to Purkinje myocyte signaling		Predicted intracellular proteins; FDA approved drug targets:Small molecule drugs; Transporters:Accessory Factors Involved in Transport		Pregabalin; Isradipine; Ibutilide; Nisoldipine; Nicardipine; Gabapentin; Felodipine; Nitrendipine; Cyclandelate; Nilvadipine; Gabapentin enacarbil			0.0	0.0	0.0	0.0	0.0	0.0	0.0	0.0	0.0	0.0	0.0	0.0	0.0	0.0	0.0	0.0	0.0	1.0	0.0	0.0
CASS4	57091	symbol	H. sapiens	57091	H. sapiens	CASS4	Cas scaffold protein family member 4	GO:0090527 actin filament reorganization;GO:1900026 positive regulation of substrate adhesion-dependent cell spreading;GO:0061098 positive regulation of protein tyrosine kinase activity		Predicted intracellular proteins					0.0	0.0	0.0	0.0	0.0	0.0	0.0	0.0	1.0	0.0	0.0	1.0	0.0	0.0	1.0	0.0	0.0	0.0	0.0	1.0
CCDC81	60494	symbol	H. sapiens	60494	H. sapiens	CCDC81	coiled-coil domain containing 81			Predicted intracellular proteins					0.0	0.0	0.0	0.0	0.0	0.0	0.0	0.0	0.0	0.0	0.0	0.0	0.0	0.0	0.0	0.0	0.0	0.0	0.0	0.0
CD2AP	23607	symbol	H. sapiens	23607	H. sapiens	CD2AP	CD2 associated protein	GO:0032911 negative regulation of transforming growth factor beta1 production;GO:0006930 substrate-dependent cell migration, cell extension;GO:0071635 negative regulation of transforming growth factor beta production		Predicted intracellular proteins; Disease related genes	Plasma membrane (Supported); Additional: Centriolar satellite;Cytosol		(M226)PID VEGFR1 PATHWAY; (M193)PID NEPHRIN NEPH1 PATHWAY	(M5893)HALLMARK MITOTIC SPINDLE	0.0	0.0	0.0	0.0	0.0	0.0	1.0	0.0	0.0	0.0	0.0	0.0	0.0	0.0	0.0	0.0	0.0	0.0	0.0	0.0
CD4	920	symbol	H. sapiens	920	H. sapiens	CD4	CD4 molecule	GO:0035397 helper T cell enhancement of adaptive immune response;GO:0006948 induction by virus of host cell-cell fusion;GO:0019054 modulation by virus of host cellular process		Predicted intracellular proteins; CD markers; FDA approved drug targets:Biotech drugs	Plasma membrane (Supported)	Antithymocyte immunoglobulin (rabbit); Clenoliximab; Ibalizumab	(M243)PID ARF 3PATHWAY; (M290)PID IL12 STAT4 PATHWAY; (M196)PID IL23 PATHWAY	(M5950)HALLMARK ALLOGRAFT REJECTION	1.0	0.0	1.0	0.0	0.0	0.0	0.0	0.0	1.0	0.0	0.0	0.0	0.0	0.0	1.0	0.0	0.0	0.0	0.0	0.0
CDK6	1021	symbol	H. sapiens	1021	H. sapiens	CDK6	cyclin dependent kinase 6	GO:0045656 negative regulation of monocyte differentiation;GO:0021670 lateral ventricle development;GO:0043696 dedifferentiation	CMGC Ser/Thr protein kinase family	Cancer-related genes:Candidate cancer biomarkers; ENZYME proteins:Transferases; Predicted intracellular proteins; FDA approved drug targets:Small molecule drugs; Enzymes; Disease related genes; Kinases:CMGC Ser/Thr protein kinases	Nucleoplasm (Supported); Additional: Cytosol	Alvocidib; (2S)-2-({6-[(3-Amino-5-chlorophenyl)amino]-9-isopropyl-9H-purin-2-yl}amino)-3-methyl-1-butanol; Fisetin; Palbociclib; Ribociclib; Abemaciclib	(M234)PID IL2 STAT5 PATHWAY; (M58)PID AR PATHWAY; (M279)PID RB 1PATHWAY	(M5919)HALLMARK HEDGEHOG SIGNALING; (M5908)HALLMARK ANDROGEN RESPONSE	1.0	0.0	0.0	0.0	0.0	0.0	0.0	0.0	1.0	0.0	0.0	1.0	0.0	0.0	0.0	0.0	0.0	0.0	1.0	1.0
CLDN1	9076	symbol	H. sapiens	9076	H. sapiens	CLDN1	claudin 1	GO:0061772 xenobiotic transport across blood-nerve barrier;GO:1903544 response to butyrate;GO:1903545 cellular response to butyrate		Transporters:Transporter channels and pores; Potential drug targets; Disease related genes			(M72)PID NECTIN PATHWAY		1.0	0.0	0.0	0.0	0.0	1.0	0.0	0.0	0.0	0.0	0.0	0.0	1.0	1.0	0.0	1.0	0.0	0.0	0.0	1.0
CLEC14A	161198	symbol	H. sapiens	161198	H. sapiens	CLEC14A	C-type lectin domain containing 14A	GO:0036325 vascular endothelial growth factor receptor-3 signaling pathway;GO:0036324 vascular endothelial growth factor receptor-2 signaling pathway;GO:0001946 lymphangiogenesis			Endoplasmic reticulum;Golgi apparatus (Supported)	Resveratrol	(M5880)NABA ECM AFFILIATED; (M5885)NABA MATRISOME ASSOCIATED; (M5889)NABA MATRISOME		0.0	0.0	0.0	0.0	0.0	0.0	0.0	0.0	0.0	0.0	1.0	0.0	0.0	0.0	1.0	0.0	0.0	0.0	0.0	0.0
CMKLR1	1240	symbol	H. sapiens	1240	H. sapiens	CMKLR1	chemerin chemokine-like receptor 1	GO:0002430 complement receptor mediated signaling pathway;GO:0032695 negative regulation of interleukin-12 production;GO:0010759 positive regulation of macrophage chemotaxis		Transporters; G-protein coupled receptors:GPCRs excl olfactory receptors				(M5913)HALLMARK INTERFERON GAMMA RESPONSE; (M5932)HALLMARK INFLAMMATORY RESPONSE; (M5953)HALLMARK KRAS SIGNALING UP	0.0	0.0	0.0	0.0	0.0	1.0	1.0	0.0	0.0	0.0	0.0	1.0	0.0	0.0	0.0	0.0	1.0	0.0	0.0	1.0
CPA3	1359	symbol	H. sapiens	1359	H. sapiens	CPA3	carboxypeptidase A3	GO:0002002 regulation of angiotensin levels in blood;GO:0002003 angiotensin maturation;GO:0001991 regulation of systemic arterial blood pressure by circulatory renin-angiotensin		Predicted secreted proteins; ENZYME proteins:Hydrolases; Enzymes; Peptidases:Metallopeptidases	Golgi apparatus (Approved); Additional: Nucleoplasm				0.0	0.0	0.0	0.0	0.0	0.0	0.0	0.0	0.0	0.0	0.0	0.0	0.0	0.0	0.0	0.0	0.0	1.0	0.0	0.0
CPA4	51200	symbol	H. sapiens	51200	H. sapiens	CPA4	carboxypeptidase A4	GO:0016573 histone acetylation;GO:0018393 internal peptidyl-lysine acetylation;GO:0006475 internal protein amino acid acetylation		Predicted intracellular proteins; Predicted secreted proteins; Enzymes; Peptidases:Metallopeptidases	Nucleoplasm (Approved); Additional: Centrosome;Cytosol				0.0	0.0	0.0	0.0	0.0	0.0	0.0	0.0	0.0	0.0	0.0	0.0	0.0	0.0	0.0	0.0	0.0	1.0	0.0	0.0
CYFIP2	26999	symbol	H. sapiens	26999	H. sapiens	CYFIP2	cytoplasmic FMR1 interacting protein 2	GO:0051388 positive regulation of neurotrophin TRK receptor signaling pathway;GO:0051386 regulation of neurotrophin TRK receptor signaling pathway;GO:0097202 activation of cysteine-type endopeptidase activity		Predicted intracellular proteins	Endoplasmic reticulum (Approved); Additional: Cytosol;Plasma membrane		(M156)PID ECADHERIN NASCENT AJ PATHWAY; (M232)PID ECADHERIN STABILIZATION PATHWAY; (M278)PID RAC1 PATHWAY	(M5934)HALLMARK XENOBIOTIC METABOLISM; (M5939)HALLMARK P53 PATHWAY	1.0	0.0	0.0	0.0	0.0	1.0	0.0	0.0	0.0	0.0	0.0	1.0	0.0	0.0	1.0	0.0	0.0	0.0	0.0	0.0
CYTIP	9595	symbol	H. sapiens	9595	H. sapiens	CYTIP	cytohesin 1 interacting protein	GO:0030155 regulation of cell adhesion;GO:0007155 cell adhesion;GO:0022610 biological adhesion		Predicted intracellular proteins	Cytosol (Approved); Additional: Nucleoplasm				0.0	0.0	0.0	0.0	0.0	0.0	0.0	0.0	1.0	0.0	0.0	0.0	0.0	0.0	0.0	0.0	0.0	0.0	0.0	0.0
DCAKD	79877	symbol	H. sapiens	79877	H. sapiens	DCAKD	dephospho-CoA kinase domain containing	GO:0015937 coenzyme A biosynthetic process;GO:0015936 coenzyme A metabolic process;GO:0033866 nucleoside bisphosphate biosynthetic process		Predicted intracellular proteins	Nucleoplasm (Approved)				0.0	0.0	0.0	0.0	0.0	0.0	0.0	0.0	0.0	0.0	0.0	0.0	0.0	0.0	0.0	0.0	0.0	0.0	0.0	0.0
DLC1	10395	symbol	H. sapiens	10395	H. sapiens	DLC1	DLC1 Rho GTPase activating protein	GO:1900119 positive regulation of execution phase of apoptosis;GO:0051895 negative regulation of focal adhesion assembly;GO:0150118 negative regulation of cell-substrate junction organization		Cancer-related genes:Candidate cancer biomarkers; Predicted intracellular proteins	Golgi apparatus;Nucleoplasm;Vesicles (Approved)		(M68)PID RHOA REG PATHWAY	(M5942)HALLMARK UV RESPONSE DN; (M5906)HALLMARK ESTROGEN RESPONSE EARLY	1.0	0.0	0.0	0.0	1.0	0.0	1.0	0.0	1.0	0.0	1.0	1.0	1.0	0.0	0.0	1.0	0.0	0.0	0.0	0.0
DNAJC16	23341	symbol	H. sapiens	23341	H. sapiens	DNAJC16	DnaJ heat shock protein family (Hsp40) member C16				Vesicles (Approved)				0.0	0.0	0.0	0.0	0.0	0.0	0.0	0.0	0.0	0.0	0.0	0.0	0.0	0.0	0.0	0.0	0.0	0.0	0.0	0.0
DNAJC6	9829	symbol	H. sapiens	9829	H. sapiens	DNAJC6	DnaJ heat shock protein family (Hsp40) member C6	GO:0016191 synaptic vesicle uncoating;GO:0072318 clathrin coat disassembly;GO:0072319 vesicle uncoating		Predicted intracellular proteins; ENZYME proteins:Hydrolases; Enzymes; Disease related genes; Potential drug targets	Cytosol (Approved); Additional: Nucleoplasm;Plasma membrane				0.0	0.0	0.0	0.0	0.0	0.0	0.0	0.0	0.0	0.0	0.0	0.0	0.0	0.0	0.0	0.0	0.0	0.0	0.0	0.0
DSCAM	1826	symbol	H. sapiens	1826	H. sapiens	DSCAM	DS cell adhesion molecule	GO:0060060 post-embryonic retina morphogenesis in camera-type eye;GO:0048842 positive regulation of axon extension involved in axon guidance;GO:0038007 netrin-activated signaling pathway			Golgi apparatus (Approved)		(M285)PID HNF3A PATHWAY; (M200)PID ERA GENOMIC PATHWAY		0.0	0.0	0.0	0.0	0.0	0.0	0.0	1.0	1.0	0.0	0.0	1.0	0.0	0.0	0.0	0.0	0.0	0.0	0.0	1.0
DUSP8	1850	symbol	H. sapiens	1850	H. sapiens	DUSP8	dual specificity phosphatase 8	GO:0035970 peptidyl-threonine dephosphorylation;GO:0035335 peptidyl-tyrosine dephosphorylation;GO:0006470 protein dephosphorylation		Predicted intracellular proteins; ENZYME proteins:Hydrolases; Enzymes	Cytosol (Approved)		(M76)PID P38 ALPHA BETA PATHWAY; (M3721)ST JNK MAPK PATHWAY; (M166)PID ATF2 PATHWAY		0.0	0.0	0.0	0.0	0.0	0.0	0.0	0.0	0.0	0.0	0.0	0.0	0.0	0.0	0.0	0.0	0.0	0.0	0.0	0.0
EFNB1	1947	symbol	H. sapiens	1947	H. sapiens	EFNB1	ephrin B1	GO:0031295 T cell costimulation;GO:0031294 lymphocyte costimulation;GO:0048013 ephrin receptor signaling pathway		Cancer-related genes:Candidate cancer biomarkers; Disease related genes	Plasma membrane (Supported)		(M257)PID EPHRINB REV PATHWAY; (M62)PID EPHB FWD PATHWAY		0.0	0.0	0.0	0.0	0.0	0.0	0.0	0.0	1.0	0.0	1.0	1.0	0.0	1.0	1.0	0.0	0.0	0.0	0.0	0.0
EIF6	3692	symbol	H. sapiens	3692	H. sapiens	EIF6	eukaryotic translation initiation factor 6	GO:1902626 assembly of large subunit precursor of preribosome;GO:0042256 mature ribosome assembly;GO:0000054 ribosomal subunit export from nucleus		Predicted intracellular proteins	Nucleoplasm (Supported)	Copper			1.0	0.0	1.0	0.0	0.0	0.0	0.0	0.0	0.0	0.0	0.0	0.0	0.0	0.0	0.0	0.0	0.0	0.0	0.0	0.0
ELMSAN1	91748	gene_synonym	H. sapiens	91748	H. sapiens	MIDEAS	mitotic deacetylase associated SANT domain protein	GO:0016575 histone deacetylation;GO:0006476 protein deacetylation;GO:0035601 protein deacylation		Predicted intracellular proteins; Transcription factors:Helix-turn-helix domains	Nucleoplasm (Enhanced)				0.0	0.0	0.0	0.0	0.0	0.0	0.0	0.0	0.0	0.0	0.0	0.0	0.0	0.0	0.0	0.0	0.0	0.0	0.0	0.0
EPB41L4B	54566	symbol	H. sapiens	54566	H. sapiens	EPB41L4B	erythrocyte membrane protein band 4.1 like 4B	GO:0051549 positive regulation of keratinocyte migration;GO:0051547 regulation of keratinocyte migration;GO:0051546 keratinocyte migration		Predicted intracellular proteins	Cytosol;Plasma membrane (Approved)				0.0	0.0	0.0	0.0	0.0	0.0	0.0	0.0	1.0	0.0	1.0	0.0	0.0	0.0	0.0	0.0	0.0	0.0	0.0	1.0
EPB41L5	57669	symbol	H. sapiens	57669	H. sapiens	EPB41L5	erythrocyte membrane protein band 4.1 like 5	GO:0009826 unidimensional cell growth;GO:0003383 apical constriction;GO:0007509 mesoderm migration involved in gastrulation		Predicted intracellular proteins	Plasma membrane (Enhanced)				0.0	0.0	0.0	0.0	1.0	1.0	0.0	0.0	1.0	0.0	1.0	1.0	1.0	1.0	0.0	1.0	0.0	0.0	0.0	1.0
EPGN	255324	symbol	H. sapiens	255324	H. sapiens	EPGN	epithelial mitogen	GO:0045741 positive regulation of epidermal growth factor-activated receptor activity;GO:0007176 regulation of epidermal growth factor-activated receptor activity;GO:0045742 positive regulation of epidermal growth factor receptor signaling pathway		Predicted intracellular proteins; Predicted secreted proteins	Cytosol;Nucleoplasm (Approved); Additional: Vesicles		(M5883)NABA SECRETED FACTORS; (M5885)NABA MATRISOME ASSOCIATED; (M5889)NABA MATRISOME		1.0	0.0	0.0	0.0	0.0	0.0	0.0	0.0	0.0	0.0	1.0	0.0	0.0	0.0	1.0	0.0	0.0	0.0	0.0	1.0
EPHA2	1969	symbol	H. sapiens	1969	H. sapiens	EPHA2	EPH receptor A2	GO:0060034 notochord cell differentiation;GO:0060035 notochord cell development;GO:0048320 axial mesoderm formation	Tyr protein kinase family	Cancer-related genes:Candidate cancer biomarkers; ENZYME proteins:Transferases; Kinases:Tyr protein kinases; RAS pathway related proteins; Cancer-related genes:Mutated cancer genes; FDA approved drug targets:Small molecule drugs; Enzymes; Disease related genes	Cell Junctions;Plasma membrane (Supported); Additional: Golgi apparatus;Nuclear speckles	Dasatinib; Phosphoaminophosphonic Acid-Adenylate Ester; Regorafenib; Fostamatinib	(M273)PID EPHA2 FWD PATHWAY; (M177)PID EPHA FWDPATHWAY; (M86)PID ARF6 PATHWAY	(M5934)HALLMARK XENOBIOTIC METABOLISM; (M5939)HALLMARK P53 PATHWAY	1.0	0.0	0.0	0.0	1.0	1.0	0.0	1.0	1.0	0.0	1.0	1.0	1.0	1.0	1.0	1.0	0.0	0.0	1.0	1.0
ERMN	57471	symbol	H. sapiens	57471	H. sapiens	ERMN	ermin	GO:0008360 regulation of cell shape;GO:0001763 morphogenesis of a branching structure;GO:0022604 regulation of cell morphogenesis		Predicted intracellular proteins	Plasma membrane (Approved); Additional: Cytosol				0.0	0.0	0.0	0.0	1.0	0.0	0.0	0.0	0.0	0.0	0.0	1.0	0.0	0.0	0.0	0.0	0.0	0.0	0.0	0.0
ERRFI1	54206	symbol	H. sapiens	54206	H. sapiens	ERRFI1	ERBB receptor feedback inhibitor 1	GO:0060426 lung vasculature development;GO:0010616 negative regulation of cardiac muscle adaptation;GO:1903243 negative regulation of cardiac muscle hypertrophy in response to stress		Predicted intracellular proteins	Cytosol (Supported)			(M5892)HALLMARK CHOLESTEROL HOMEOSTASIS; (M5891)HALLMARK HYPOXIA	0.0	0.0	0.0	0.0	0.0	1.0	0.0	0.0	0.0	0.0	0.0	0.0	0.0	0.0	1.0	1.0	0.0	0.0	0.0	1.0
F2R	2149	symbol	H. sapiens	2149	H. sapiens	F2R	coagulation factor II thrombin receptor	GO:1900134 negative regulation of renin secretion into blood stream;GO:0007529 establishment of synaptic specificity at neuromuscular junction;GO:0099552 trans-synaptic signaling by lipid, modulating synaptic transmission		Predicted intracellular proteins; FDA approved drug targets:Small molecule drugs; G-protein coupled receptors:GPCRs excl olfactory receptors		Streptokinase; SR-123781A; Vorapaxar; Thrombin	(M238)PID THROMBIN PAR1 PATHWAY	(M5902)HALLMARK APOPTOSIS; (M5939)HALLMARK P53 PATHWAY; (M5950)HALLMARK ALLOGRAFT REJECTION	0.0	0.0	1.0	0.0	0.0	0.0	1.0	0.0	0.0	0.0	0.0	0.0	0.0	0.0	1.0	0.0	0.0	1.0	0.0	1.0
F2RL2	2151	symbol	H. sapiens	2151	H. sapiens	F2RL2	coagulation factor II thrombin receptor like 2	GO:0070493 thrombin-activated receptor signaling pathway;GO:0035025 positive regulation of Rho protein signal transduction;GO:0051482 positive regulation of cytosolic calcium ion concentration involved in phospholipase C-activating G protein-coupled signaling pathway		G-protein coupled receptors:GPCRs excl olfactory receptors			(M138)PID THROMBIN PAR4 PATHWAY; (M15743)ST GA12 PATHWAY; (M193)PID NEPHRIN NEPH1 PATHWAY	(M5946)HALLMARK COAGULATION; (M5947)HALLMARK IL2 STAT5 SIGNALING	0.0	0.0	1.0	0.0	0.0	0.0	1.0	0.0	0.0	0.0	0.0	0.0	0.0	0.0	0.0	0.0	0.0	0.0	0.0	1.0
FAM212B	55924	gene_synonym	H. sapiens	55924	H. sapiens	INKA2	inka box actin regulator 2	GO:0043086 negative regulation of catalytic activity;GO:0044092 negative regulation of molecular function;GO:0050790 regulation of catalytic activity		Predicted intracellular proteins	Nucleoplasm (Supported); Additional: Nucleoli;Vesicles				0.0	0.0	0.0	0.0	0.0	0.0	0.0	0.0	0.0	0.0	0.0	0.0	0.0	0.0	0.0	0.0	0.0	0.0	0.0	0.0
FGD4	121512	symbol	H. sapiens	121512	H. sapiens	FGD4	FYVE, RhoGEF and PH domain containing 4	GO:0046847 filopodium assembly;GO:0008360 regulation of cell shape;GO:0051056 regulation of small GTPase mediated signal transduction		Predicted intracellular proteins; Disease related genes	Actin filaments (Approved)			(M5893)HALLMARK MITOTIC SPINDLE	1.0	0.0	0.0	0.0	0.0	0.0	1.0	0.0	0.0	0.0	0.0	0.0	0.0	0.0	0.0	0.0	0.0	0.0	0.0	0.0
FGF5	2250	symbol	H. sapiens	2250	H. sapiens	FGF5	fibroblast growth factor 5	GO:0023019 signal transduction involved in regulation of gene expression;GO:0008543 fibroblast growth factor receptor signaling pathway;GO:0051781 positive regulation of cell division		Predicted secreted proteins; Disease related genes; RAS pathway related proteins	Nucleoli fibrillar center (Supported); Additional: Cytosol;Nucleoplasm		(M5883)NABA SECRETED FACTORS; (M5885)NABA MATRISOME ASSOCIATED; (M5889)NABA MATRISOME		0.0	0.0	0.0	0.0	0.0	1.0	0.0	0.0	0.0	0.0	0.0	0.0	0.0	0.0	1.0	0.0	0.0	0.0	0.0	0.0
FLJ16779	100192386	symbol	H. sapiens	100192386	H. sapiens	FLJ16779	uncharacterized LOC100192386								0.0	0.0	0.0	0.0	0.0	0.0	0.0	0.0	0.0	0.0	0.0	0.0	0.0	0.0	0.0	0.0	0.0	0.0	0.0	0.0
FOS	2353	symbol	H. sapiens	2353	H. sapiens	FOS	Fos proto-oncogene, AP-1 transcription factor subunit	GO:0001661 conditioned taste aversion;GO:0009629 response to gravity;GO:0051412 response to corticosterone		Cancer-related genes:Candidate cancer biomarkers; Predicted intracellular proteins; Transcription factors:Basic domains	Nucleoplasm (Supported)	Nadroparin	(M134)PID TCR RAS PATHWAY; (M206)PID PDGFRA PATHWAY; (M268)PID S1P S1P2 PATHWAY	(M5941)HALLMARK UV RESPONSE UP; (M5890)HALLMARK TNFA SIGNALING VIA NFKB; (M5891)HALLMARK HYPOXIA	1.0	0.0	1.0	0.0	0.0	1.0	0.0	0.0	0.0	0.0	0.0	0.0	0.0	1.0	0.0	1.0	0.0	1.0	0.0	0.0
FOXC2	2303	symbol	H. sapiens	2303	H. sapiens	FOXC2	forkhead box C2	GO:1902257 negative regulation of apoptotic process involved in outflow tract morphogenesis;GO:0048342 paraxial mesodermal cell differentiation;GO:0048343 paraxial mesodermal cell fate commitment		Predicted intracellular proteins; Disease related genes; Transcription factors:Helix-turn-helix domains	Nuclear bodies;Nucleoplasm (Supported)			(M5930)HALLMARK EPITHELIAL MESENCHYMAL TRANSITION	1.0	0.0	0.0	0.0	1.0	1.0	0.0	1.0	1.0	0.0	1.0	0.0	1.0	1.0	1.0	0.0	0.0	0.0	1.0	1.0
FOXE1	2304	symbol	H. sapiens	2304	H. sapiens	FOXE1	forkhead box E1	GO:0060465 pharynx development;GO:0060023 soft palate development;GO:0060022 hard palate development		Predicted intracellular proteins; Disease related genes; Transcription factors:Helix-turn-helix domains					0.0	0.0	0.0	0.0	1.0	0.0	0.0	0.0	0.0	0.0	0.0	0.0	1.0	0.0	0.0	1.0	0.0	1.0	0.0	0.0
FOXE3	2301	symbol	H. sapiens	2301	H. sapiens	FOXE3	forkhead box E3	GO:0002930 trabecular meshwork development;GO:0097166 lens epithelial cell proliferation;GO:2001109 regulation of lens epithelial cell proliferation		Predicted intracellular proteins; Disease related genes; Transcription factors:Helix-turn-helix domains					1.0	0.0	0.0	0.0	0.0	0.0	0.0	1.0	0.0	0.0	0.0	0.0	0.0	0.0	0.0	0.0	0.0	0.0	0.0	1.0
FST	10468	symbol	H. sapiens	10468	H. sapiens	FST	follistatin	GO:0051798 positive regulation of hair follicle development;GO:0032926 negative regulation of activin receptor signaling pathway;GO:0051797 regulation of hair follicle development		Cancer-related genes:Candidate cancer biomarkers; Candidate cardiovascular disease genes; Predicted secreted proteins; Predicted intracellular proteins	Vesicles (Approved)	D-Myo-Inositol-Hexasulphate	(M181)PID BMP PATHWAY; (M5883)NABA SECRETED FACTORS; (M5885)NABA MATRISOME ASSOCIATED	(M5909)HALLMARK MYOGENESIS	1.0	0.0	0.0	0.0	1.0	1.0	0.0	0.0	0.0	0.0	0.0	0.0	0.0	1.0	0.0	1.0	0.0	0.0	0.0	1.0
GBX2	2637	symbol	H. sapiens	2637	H. sapiens	GBX2	gastrulation brain homeobox 2	GO:0021568 rhombomere 2 development;GO:0021555 midbrain-hindbrain boundary morphogenesis;GO:0021546 rhombomere development		Predicted intracellular proteins; Transcription factors:Helix-turn-helix domains	Nucleoplasm (Approved)				1.0	0.0	0.0	0.0	1.0	0.0	0.0	1.0	0.0	0.0	1.0	1.0	1.0	1.0	0.0	1.0	0.0	0.0	1.0	0.0
GLCCI1	113263	symbol	H. sapiens	113263	H. sapiens	GLCCI1	glucocorticoid induced 1			Predicted intracellular proteins	Nucleoli (Approved)				0.0	0.0	0.0	0.0	0.0	0.0	0.0	0.0	0.0	0.0	0.0	0.0	0.0	0.0	0.0	0.0	0.0	0.0	0.0	0.0
GNAQ	2776	symbol	H. sapiens	2776	H. sapiens	GNAQ	G protein subunit alpha q	GO:0007603 phototransduction, visible light;GO:0007213 G protein-coupled acetylcholine receptor signaling pathway;GO:0095500 acetylcholine receptor signaling pathway		Predicted intracellular proteins; Disease related genes; Cancer-related genes	Nuclear speckles (Approved); Additional: Cytosol;Plasma membrane		(M599)ST PAC1 RECEPTOR PATHWAY; (M138)PID THROMBIN PAR4 PATHWAY; (M155)PID S1P META PATHWAY		0.0	0.0	1.0	0.0	0.0	0.0	1.0	0.0	0.0	0.0	0.0	0.0	0.0	0.0	0.0	0.0	0.0	1.0	0.0	1.0
GPR65	8477	symbol	H. sapiens	8477	H. sapiens	GPR65	G protein-coupled receptor 65	GO:0010447 response to acidic pH;GO:0035025 positive regulation of Rho protein signal transduction;GO:0051482 positive regulation of cytosolic calcium ion concentration involved in phospholipase C-activating G protein-coupled signaling pathway		G-protein coupled receptors:Lysolipids receptors; G-protein coupled receptors:GPCRs excl olfactory receptors	Vesicles (Approved); Additional: Cytosol;Nucleoli			(M5947)HALLMARK IL2 STAT5 SIGNALING; (M5950)HALLMARK ALLOGRAFT REJECTION	0.0	0.0	0.0	0.0	0.0	0.0	1.0	0.0	0.0	0.0	0.0	0.0	0.0	0.0	0.0	0.0	0.0	1.0	0.0	0.0
HACD1	9200	symbol	H. sapiens	9200	H. sapiens	HACD1	3-hydroxyacyl-CoA dehydratase 1	GO:0030497 fatty acid elongation;GO:0042761 very long-chain fatty acid biosynthetic process;GO:0035338 long-chain fatty-acyl-CoA biosynthetic process		ENZYME proteins:Lyases; Predicted intracellular proteins; Enzymes; Disease related genes; Potential drug targets					0.0	0.0	0.0	0.0	0.0	0.0	0.0	0.0	0.0	0.0	0.0	0.0	0.0	0.0	0.0	0.0	0.0	0.0	0.0	0.0
HAS3	3038	symbol	H. sapiens	3038	H. sapiens	HAS3	hyaluronan synthase 3	GO:0036118 hyaluranon cable assembly;GO:1900104 regulation of hyaluranon cable assembly;GO:1900106 positive regulation of hyaluranon cable assembly		ENZYME proteins:Transferases; Enzymes	Microtubules (Approved)				0.0	0.0	0.0	0.0	0.0	0.0	0.0	0.0	0.0	0.0	0.0	0.0	0.0	0.0	0.0	0.0	0.0	0.0	0.0	0.0
HELZ	9931	symbol	H. sapiens	9931	H. sapiens	HELZ	helicase with zinc finger	GO:0035194 post-transcriptional gene silencing by RNA;GO:0016441 posttranscriptional gene silencing;GO:0031047 gene silencing by RNA		Predicted intracellular proteins	Nucleoli;Nucleoli rim (Approved); Additional: Actin filaments;Plasma membrane				0.0	0.0	1.0	0.0	0.0	0.0	0.0	0.0	0.0	0.0	0.0	0.0	0.0	0.0	0.0	0.0	0.0	0.0	0.0	0.0
HIST1H1A	3024	gene_synonym	H. sapiens	3024	H. sapiens	H1-1	H1.1 linker histone, cluster member	GO:0031936 negative regulation of chromatin silencing;GO:0016584 nucleosome positioning;GO:0031935 regulation of chromatin silencing		Predicted intracellular proteins	Nucleoplasm (Supported)				1.0	1.0	1.0	1.0	0.0	0.0	0.0	0.0	0.0	0.0	0.0	0.0	0.0	0.0	0.0	0.0	0.0	0.0	0.0	0.0
HIST1H1B	3009	gene_synonym	H. sapiens	3009	H. sapiens	H1-5	H1.5 linker histone, cluster member	GO:0071169 establishment of protein localization to chromatin;GO:0051574 positive regulation of histone H3-K9 methylation;GO:0031936 negative regulation of chromatin silencing		Predicted intracellular proteins	Nucleoplasm (Supported)				1.0	1.0	1.0	1.0	0.0	0.0	0.0	0.0	0.0	0.0	0.0	0.0	0.0	0.0	0.0	0.0	0.0	0.0	0.0	0.0
HIST1H1C	3006	gene_synonym	H. sapiens	3006	H. sapiens	H1-2	H1.2 linker histone, cluster member	GO:0098532 histone H3-K27 trimethylation;GO:0031936 negative regulation of chromatin silencing;GO:0016584 nucleosome positioning		Predicted intracellular proteins	Nucleoli rim;Nucleoplasm (Supported)			(M5939)HALLMARK P53 PATHWAY	1.0	1.0	1.0	1.0	0.0	0.0	0.0	0.0	0.0	0.0	0.0	0.0	0.0	0.0	0.0	0.0	0.0	0.0	0.0	0.0
HIST1H1D	3007	gene_synonym	H. sapiens	3007	H. sapiens	H1-3	H1.3 linker histone, cluster member	GO:0031936 negative regulation of chromatin silencing;GO:0016584 nucleosome positioning;GO:0031935 regulation of chromatin silencing		Predicted intracellular proteins					1.0	1.0	1.0	1.0	0.0	0.0	0.0	0.0	0.0	0.0	0.0	0.0	0.0	0.0	0.0	0.0	0.0	0.0	0.0	0.0
HIST1H1E	3008	gene_synonym	H. sapiens	3008	H. sapiens	H1-4	H1.4 linker histone, cluster member	GO:0031936 negative regulation of chromatin silencing;GO:0016584 nucleosome positioning;GO:0031935 regulation of chromatin silencing		Cancer-related genes:Mutated cancer genes; Predicted intracellular proteins; Disease related genes	Nuclear speckles (Supported)	Copper	(M32)PID HDAC CLASSIII PATHWAY		1.0	1.0	1.0	1.0	0.0	0.0	0.0	0.0	0.0	1.0	0.0	0.0	0.0	0.0	0.0	0.0	0.0	0.0	0.0	0.0
HIST1H2AB	8335	gene_synonym	H. sapiens	8335	H. sapiens	H2AC4	H2A clustered histone 4	GO:0006342 chromatin silencing;GO:0045814 negative regulation of gene expression, epigenetic;GO:0097549 chromatin organization involved in negative regulation of transcription		Predicted intracellular proteins	Nucleoplasm (Approved)				1.0	1.0	1.0	0.0	0.0	0.0	0.0	0.0	0.0	0.0	0.0	0.0	0.0	0.0	0.0	0.0	0.0	0.0	0.0	0.0
HIST1H2AC	8334	gene_synonym	H. sapiens	8334	H. sapiens	H2AC6	H2A clustered histone 6	GO:0006342 chromatin silencing;GO:0045814 negative regulation of gene expression, epigenetic;GO:0097549 chromatin organization involved in negative regulation of transcription		Cancer-related genes:Candidate cancer biomarkers; Predicted intracellular proteins	Nucleoplasm (Approved)				1.0	1.0	1.0	0.0	0.0	0.0	0.0	0.0	0.0	0.0	0.0	0.0	0.0	0.0	0.0	0.0	0.0	0.0	0.0	0.0
HIST1H2AD	3013	gene_synonym	H. sapiens	3013	H. sapiens	H2AC7	H2A clustered histone 7	GO:0006342 chromatin silencing;GO:0045814 negative regulation of gene expression, epigenetic;GO:0097549 chromatin organization involved in negative regulation of transcription		Predicted intracellular proteins	Nucleoplasm (Approved)				1.0	1.0	1.0	0.0	0.0	0.0	0.0	0.0	0.0	0.0	0.0	0.0	0.0	0.0	0.0	0.0	0.0	0.0	0.0	0.0
HIST1H2AE	3012	gene_synonym	H. sapiens	3012	H. sapiens	H2AC8	H2A clustered histone 8	GO:0006342 chromatin silencing;GO:0045814 negative regulation of gene expression, epigenetic;GO:0097549 chromatin organization involved in negative regulation of transcription		Predicted intracellular proteins	Nucleoplasm (Supported)				1.0	1.0	1.0	0.0	0.0	0.0	0.0	0.0	0.0	0.0	0.0	0.0	0.0	0.0	0.0	0.0	0.0	0.0	0.0	0.0
HIST1H2AG	8969	gene_synonym	H. sapiens	8969	H. sapiens	H2AC11	H2A clustered histone 11	GO:0006342 chromatin silencing;GO:0045814 negative regulation of gene expression, epigenetic;GO:0097549 chromatin organization involved in negative regulation of transcription		Predicted intracellular proteins	Nucleoplasm (Approved)				1.0	1.0	1.0	0.0	0.0	0.0	0.0	0.0	0.0	0.0	0.0	0.0	0.0	0.0	0.0	0.0	0.0	0.0	0.0	0.0
HIST1H2AH	85235	gene_synonym	H. sapiens	85235	H. sapiens	H2AC12	H2A clustered histone 12	GO:0006342 chromatin silencing;GO:0045814 negative regulation of gene expression, epigenetic;GO:0097549 chromatin organization involved in negative regulation of transcription		Predicted intracellular proteins	Nucleoplasm (Approved)				1.0	1.0	1.0	0.0	0.0	0.0	0.0	0.0	0.0	0.0	0.0	0.0	0.0	0.0	0.0	0.0	0.0	0.0	0.0	0.0
HIST1H2AI	8329	gene_synonym	H. sapiens	8329	H. sapiens	H2AC13	H2A clustered histone 13	GO:0006342 chromatin silencing;GO:0045814 negative regulation of gene expression, epigenetic;GO:0097549 chromatin organization involved in negative regulation of transcription		Predicted intracellular proteins	Nucleoplasm (Approved)				1.0	1.0	1.0	0.0	0.0	0.0	0.0	0.0	0.0	0.0	0.0	0.0	0.0	0.0	0.0	0.0	0.0	0.0	0.0	0.0
HIST1H2AJ	8331	gene_synonym	H. sapiens	8331	H. sapiens	H2AC14	H2A clustered histone 14			Predicted intracellular proteins	Nucleoplasm (Approved)				1.0	1.0	0.0	0.0	0.0	0.0	0.0	0.0	0.0	0.0	0.0	0.0	0.0	0.0	0.0	0.0	0.0	0.0	0.0	0.0
HIST1H2AK	8330	gene_synonym	H. sapiens	8330	H. sapiens	H2AC15	H2A clustered histone 15	GO:0006342 chromatin silencing;GO:0045814 negative regulation of gene expression, epigenetic;GO:0097549 chromatin organization involved in negative regulation of transcription		Predicted intracellular proteins	Nucleoplasm (Approved)				1.0	1.0	1.0	0.0	0.0	0.0	0.0	0.0	0.0	0.0	0.0	0.0	0.0	0.0	0.0	0.0	0.0	0.0	0.0	0.0
HIST1H2AL	8332	gene_synonym	H. sapiens	8332	H. sapiens	H2AC16	H2A clustered histone 16	GO:0006342 chromatin silencing;GO:0045814 negative regulation of gene expression, epigenetic;GO:0097549 chromatin organization involved in negative regulation of transcription		Predicted intracellular proteins	Nucleoplasm (Approved)				1.0	1.0	1.0	0.0	0.0	0.0	0.0	0.0	0.0	0.0	0.0	0.0	0.0	0.0	0.0	0.0	0.0	0.0	0.0	0.0
HIST1H2AM	8336	gene_synonym	H. sapiens	8336	H. sapiens	H2AC17	H2A clustered histone 17	GO:0006342 chromatin silencing;GO:0045814 negative regulation of gene expression, epigenetic;GO:0097549 chromatin organization involved in negative regulation of transcription		Predicted intracellular proteins	Nucleoplasm (Approved)				1.0	1.0	1.0	0.0	0.0	0.0	0.0	0.0	0.0	0.0	0.0	0.0	0.0	0.0	0.0	0.0	0.0	0.0	0.0	0.0
HIST1H2BC	3017	gene_synonym	H. sapiens	3017	H. sapiens	H2BC5	H2B clustered histone 5	GO:0006334 nucleosome assembly;GO:0034728 nucleosome organization;GO:0031497 chromatin assembly		Predicted intracellular proteins	Nucleoplasm (Approved); Additional: Cytosol				1.0	1.0	0.0	0.0	0.0	0.0	0.0	0.0	0.0	1.0	0.0	0.0	0.0	0.0	0.0	0.0	0.0	0.0	0.0	0.0
HIST1H2BD	3017	gene_synonym	H. sapiens	3017	H. sapiens	H2BC5	H2B clustered histone 5	GO:0006334 nucleosome assembly;GO:0034728 nucleosome organization;GO:0031497 chromatin assembly		Predicted intracellular proteins	Nucleoplasm (Approved); Additional: Cytosol				1.0	1.0	0.0	0.0	0.0	0.0	0.0	0.0	0.0	1.0	0.0	0.0	0.0	0.0	0.0	0.0	0.0	0.0	0.0	0.0
HIST1H2BE	3017	gene_synonym	H. sapiens	3017	H. sapiens	H2BC5	H2B clustered histone 5	GO:0006334 nucleosome assembly;GO:0034728 nucleosome organization;GO:0031497 chromatin assembly		Predicted intracellular proteins	Nucleoplasm (Approved); Additional: Cytosol				1.0	1.0	0.0	0.0	0.0	0.0	0.0	0.0	0.0	1.0	0.0	0.0	0.0	0.0	0.0	0.0	0.0	0.0	0.0	0.0
HIST1H2BF	3017	gene_synonym	H. sapiens	3017	H. sapiens	H2BC5	H2B clustered histone 5	GO:0006334 nucleosome assembly;GO:0034728 nucleosome organization;GO:0031497 chromatin assembly		Predicted intracellular proteins	Nucleoplasm (Approved); Additional: Cytosol				1.0	1.0	0.0	0.0	0.0	0.0	0.0	0.0	0.0	1.0	0.0	0.0	0.0	0.0	0.0	0.0	0.0	0.0	0.0	0.0
HIST1H2BG	3017	gene_synonym	H. sapiens	3017	H. sapiens	H2BC5	H2B clustered histone 5	GO:0006334 nucleosome assembly;GO:0034728 nucleosome organization;GO:0031497 chromatin assembly		Predicted intracellular proteins	Nucleoplasm (Approved); Additional: Cytosol				1.0	1.0	0.0	0.0	0.0	0.0	0.0	0.0	0.0	1.0	0.0	0.0	0.0	0.0	0.0	0.0	0.0	0.0	0.0	0.0
HIST1H2BH	8345	gene_synonym	H. sapiens	8345	H. sapiens	H2BC9	H2B clustered histone 9	GO:0006334 nucleosome assembly;GO:0034728 nucleosome organization;GO:0031497 chromatin assembly		Predicted intracellular proteins	Nucleoplasm (Approved); Additional: Cytosol				1.0	1.0	0.0	0.0	0.0	0.0	0.0	0.0	0.0	1.0	0.0	0.0	0.0	0.0	0.0	0.0	0.0	0.0	0.0	0.0
HIST1H2BI	3017	gene_synonym	H. sapiens	3017	H. sapiens	H2BC5	H2B clustered histone 5	GO:0006334 nucleosome assembly;GO:0034728 nucleosome organization;GO:0031497 chromatin assembly		Predicted intracellular proteins	Nucleoplasm (Approved); Additional: Cytosol				1.0	1.0	0.0	0.0	0.0	0.0	0.0	0.0	0.0	1.0	0.0	0.0	0.0	0.0	0.0	0.0	0.0	0.0	0.0	0.0
HIST1H2BJ	8970	gene_synonym	H. sapiens	8970	H. sapiens	H2BC11	H2B clustered histone 11	GO:0010804 negative regulation of tumor necrosis factor-mediated signaling pathway;GO:0002227 innate immune response in mucosa;GO:0002385 mucosal immune response		Predicted intracellular proteins	Nucleoplasm (Approved); Additional: Cytosol				1.0	1.0	0.0	0.0	0.0	0.0	0.0	0.0	0.0	1.0	0.0	0.0	0.0	0.0	0.0	0.0	1.0	0.0	0.0	0.0
HIST1H2BL	8340	gene_synonym	H. sapiens	8340	H. sapiens	H2BC13	H2B clustered histone 13	GO:0006334 nucleosome assembly;GO:0034728 nucleosome organization;GO:0031497 chromatin assembly		Predicted intracellular proteins	Nucleoplasm (Approved); Additional: Cytosol				1.0	1.0	0.0	0.0	0.0	0.0	0.0	0.0	0.0	1.0	0.0	0.0	0.0	0.0	0.0	0.0	0.0	0.0	0.0	0.0
HIST1H2BM	8342	gene_synonym	H. sapiens	8342	H. sapiens	H2BC14	H2B clustered histone 14	GO:0006334 nucleosome assembly;GO:0034728 nucleosome organization;GO:0031497 chromatin assembly		Predicted intracellular proteins	Nucleoplasm (Approved); Additional: Cytosol				1.0	1.0	0.0	0.0	0.0	0.0	0.0	0.0	0.0	1.0	0.0	0.0	0.0	0.0	0.0	0.0	0.0	0.0	0.0	0.0
HIST1H2BN	8341	gene_synonym	H. sapiens	8341	H. sapiens	H2BC15	H2B clustered histone 15	GO:0006334 nucleosome assembly;GO:0034728 nucleosome organization;GO:0031497 chromatin assembly		Predicted intracellular proteins	Nucleoplasm (Approved); Additional: Cytosol				1.0	1.0	0.0	0.0	0.0	0.0	0.0	0.0	0.0	1.0	0.0	0.0	0.0	0.0	0.0	0.0	0.0	0.0	0.0	0.0
HIST1H2BO	8348	gene_synonym	H. sapiens	8348	H. sapiens	H2BC17	H2B clustered histone 17	GO:0006334 nucleosome assembly;GO:0034728 nucleosome organization;GO:0031497 chromatin assembly		Predicted intracellular proteins	Nucleoplasm (Approved); Additional: Cytosol				1.0	1.0	0.0	0.0	0.0	0.0	0.0	0.0	0.0	1.0	0.0	0.0	0.0	0.0	0.0	0.0	0.0	0.0	0.0	0.0
HIST1H3A	8350	gene_synonym	H. sapiens	8350	H. sapiens	H3C1	H3 clustered histone 1	GO:0006335 DNA replication-dependent nucleosome assembly;GO:0034723 DNA replication-dependent nucleosome organization;GO:0060968 regulation of gene silencing		Predicted intracellular proteins; Disease related genes					1.0	0.0	1.0	0.0	0.0	0.0	0.0	0.0	0.0	0.0	0.0	0.0	0.0	0.0	0.0	0.0	0.0	0.0	0.0	0.0
HIST1H3B	8358	gene_synonym	H. sapiens	8358	H. sapiens	H3C2	H3 clustered histone 2	GO:0006335 DNA replication-dependent nucleosome assembly;GO:0034723 DNA replication-dependent nucleosome organization;GO:0060968 regulation of gene silencing							1.0	0.0	1.0	0.0	0.0	0.0	0.0	0.0	0.0	0.0	0.0	0.0	0.0	0.0	0.0	0.0	0.0	0.0	0.0	0.0
HIST1H3C	8352	gene_synonym	H. sapiens	8352	H. sapiens	H3C3	H3 clustered histone 3	GO:0006335 DNA replication-dependent nucleosome assembly;GO:0034723 DNA replication-dependent nucleosome organization;GO:0060968 regulation of gene silencing							1.0	0.0	1.0	0.0	0.0	0.0	0.0	0.0	0.0	0.0	0.0	0.0	0.0	0.0	0.0	0.0	0.0	0.0	0.0	0.0
HIST1H3D	8351	gene_synonym	H. sapiens	8351	H. sapiens	H3C4	H3 clustered histone 4	GO:0006335 DNA replication-dependent nucleosome assembly;GO:0034723 DNA replication-dependent nucleosome organization;GO:0060968 regulation of gene silencing		Predicted intracellular proteins; Disease related genes					1.0	0.0	1.0	0.0	0.0	0.0	0.0	0.0	0.0	1.0	0.0	0.0	0.0	0.0	0.0	0.0	0.0	0.0	0.0	0.0
HIST1H3E	8353	gene_synonym	H. sapiens	8353	H. sapiens	H3C6	H3 clustered histone 6	GO:0006335 DNA replication-dependent nucleosome assembly;GO:0034723 DNA replication-dependent nucleosome organization;GO:0060968 regulation of gene silencing		Predicted intracellular proteins; Disease related genes					1.0	0.0	1.0	0.0	0.0	0.0	0.0	0.0	0.0	0.0	0.0	0.0	0.0	0.0	0.0	0.0	0.0	0.0	0.0	0.0
HIST1H3F	8968	gene_synonym	H. sapiens	8968	H. sapiens	H3C7	H3 clustered histone 7	GO:0006335 DNA replication-dependent nucleosome assembly;GO:0034723 DNA replication-dependent nucleosome organization;GO:0060968 regulation of gene silencing		Predicted intracellular proteins; Disease related genes					1.0	0.0	1.0	0.0	0.0	0.0	0.0	0.0	0.0	0.0	0.0	0.0	0.0	0.0	0.0	0.0	0.0	0.0	0.0	0.0
HIST1H3G	8355	gene_synonym	H. sapiens	8355	H. sapiens	H3C8	H3 clustered histone 8	GO:0006335 DNA replication-dependent nucleosome assembly;GO:0034723 DNA replication-dependent nucleosome organization;GO:0060968 regulation of gene silencing		Predicted intracellular proteins; Disease related genes					1.0	0.0	1.0	0.0	0.0	0.0	0.0	0.0	0.0	0.0	0.0	0.0	0.0	0.0	0.0	0.0	0.0	0.0	0.0	0.0
HIST1H3H	8357	gene_synonym	H. sapiens	8357	H. sapiens	H3C10	H3 clustered histone 10	GO:0006335 DNA replication-dependent nucleosome assembly;GO:0034723 DNA replication-dependent nucleosome organization;GO:0060968 regulation of gene silencing		Predicted intracellular proteins; Disease related genes					1.0	0.0	1.0	0.0	0.0	0.0	0.0	0.0	0.0	0.0	0.0	0.0	0.0	0.0	0.0	0.0	0.0	0.0	0.0	0.0
HIST1H3J	8356	gene_synonym	H. sapiens	8356	H. sapiens	H3C12	H3 clustered histone 12	GO:0006335 DNA replication-dependent nucleosome assembly;GO:0034723 DNA replication-dependent nucleosome organization;GO:0060968 regulation of gene silencing		Predicted intracellular proteins; Disease related genes					1.0	0.0	1.0	0.0	0.0	0.0	0.0	0.0	0.0	0.0	0.0	0.0	0.0	0.0	0.0	0.0	0.0	0.0	0.0	0.0
HIST1H4B	8366	gene_synonym	H. sapiens	8366	H. sapiens	H4C2	H4 clustered histone 2	GO:0045653 negative regulation of megakaryocyte differentiation;GO:0006335 DNA replication-dependent nucleosome assembly;GO:0034723 DNA replication-dependent nucleosome organization		Predicted intracellular proteins; Disease related genes					1.0	0.0	0.0	0.0	0.0	0.0	0.0	0.0	0.0	0.0	0.0	0.0	0.0	0.0	0.0	0.0	0.0	0.0	0.0	0.0
HIST1H4C	8364	gene_synonym	H. sapiens	8364	H. sapiens	H4C3	H4 clustered histone 3	GO:0045653 negative regulation of megakaryocyte differentiation;GO:0006335 DNA replication-dependent nucleosome assembly;GO:0034723 DNA replication-dependent nucleosome organization		Predicted intracellular proteins; Disease related genes				(M5945)HALLMARK HEME METABOLISM	1.0	0.0	0.0	0.0	0.0	0.0	0.0	0.0	0.0	0.0	0.0	0.0	0.0	0.0	0.0	0.0	0.0	0.0	0.0	0.0
HIST1H4D	8360	gene_synonym	H. sapiens	8360	H. sapiens	H4C4	H4 clustered histone 4	GO:0045653 negative regulation of megakaryocyte differentiation;GO:0006335 DNA replication-dependent nucleosome assembly;GO:0034723 DNA replication-dependent nucleosome organization		Predicted intracellular proteins; Disease related genes					1.0	0.0	0.0	0.0	0.0	0.0	0.0	0.0	0.0	0.0	0.0	0.0	0.0	0.0	0.0	0.0	0.0	0.0	0.0	0.0
HIST1H4E	8367	gene_synonym	H. sapiens	8367	H. sapiens	H4C5	H4 clustered histone 5	GO:0045653 negative regulation of megakaryocyte differentiation;GO:0006335 DNA replication-dependent nucleosome assembly;GO:0034723 DNA replication-dependent nucleosome organization		Cancer-related genes:Mutated cancer genes; Predicted intracellular proteins; Disease related genes					1.0	0.0	0.0	0.0	0.0	0.0	0.0	0.0	0.0	0.0	0.0	0.0	0.0	0.0	0.0	0.0	0.0	0.0	0.0	0.0
HIST1H4F	8361	gene_synonym	H. sapiens	8361	H. sapiens	H4C6	H4 clustered histone 6	GO:0045653 negative regulation of megakaryocyte differentiation;GO:0006335 DNA replication-dependent nucleosome assembly;GO:0034723 DNA replication-dependent nucleosome organization		Predicted intracellular proteins; Disease related genes					1.0	0.0	0.0	0.0	0.0	0.0	0.0	0.0	0.0	0.0	0.0	0.0	0.0	0.0	0.0	0.0	0.0	0.0	0.0	0.0
HIST1H4H	8365	gene_synonym	H. sapiens	8365	H. sapiens	H4C8	H4 clustered histone 8	GO:0045653 negative regulation of megakaryocyte differentiation;GO:0006335 DNA replication-dependent nucleosome assembly;GO:0034723 DNA replication-dependent nucleosome organization		Predicted intracellular proteins; Disease related genes					1.0	0.0	0.0	0.0	0.0	0.0	0.0	0.0	0.0	0.0	0.0	0.0	0.0	0.0	0.0	0.0	0.0	0.0	0.0	0.0
HIST1H4I	8294	gene_synonym	H. sapiens	8294	H. sapiens	H4C9	H4 clustered histone 9	GO:0045653 negative regulation of megakaryocyte differentiation;GO:0006335 DNA replication-dependent nucleosome assembly;GO:0034723 DNA replication-dependent nucleosome organization		Predicted intracellular proteins; Disease related genes; Cancer-related genes			(M32)PID HDAC CLASSIII PATHWAY		1.0	0.0	0.0	0.0	0.0	0.0	0.0	0.0	0.0	0.0	0.0	0.0	0.0	0.0	0.0	0.0	0.0	0.0	0.0	0.0
HIST1H4J	8363	gene_synonym	H. sapiens	8363	H. sapiens	H4C11	H4 clustered histone 11	GO:0045653 negative regulation of megakaryocyte differentiation;GO:0006335 DNA replication-dependent nucleosome assembly;GO:0034723 DNA replication-dependent nucleosome organization		Predicted intracellular proteins; Disease related genes					1.0	0.0	0.0	0.0	0.0	0.0	0.0	0.0	0.0	0.0	0.0	0.0	0.0	0.0	0.0	0.0	0.0	0.0	0.0	0.0
HIST1H4K	8362	gene_synonym	H. sapiens	8362	H. sapiens	H4C12	H4 clustered histone 12	GO:0045653 negative regulation of megakaryocyte differentiation;GO:0006335 DNA replication-dependent nucleosome assembly;GO:0034723 DNA replication-dependent nucleosome organization		Predicted intracellular proteins; Disease related genes					1.0	0.0	0.0	0.0	0.0	0.0	0.0	0.0	0.0	0.0	0.0	0.0	0.0	0.0	0.0	0.0	0.0	0.0	0.0	0.0
HIST1H4L	8368	gene_synonym	H. sapiens	8368	H. sapiens	H4C13	H4 clustered histone 13	GO:0045653 negative regulation of megakaryocyte differentiation;GO:0006335 DNA replication-dependent nucleosome assembly;GO:0034723 DNA replication-dependent nucleosome organization		Predicted intracellular proteins; Disease related genes					1.0	0.0	0.0	0.0	0.0	0.0	0.0	0.0	0.0	0.0	0.0	0.0	0.0	0.0	0.0	0.0	0.0	0.0	0.0	0.0
HIST2H2AB	317772	gene_synonym	H. sapiens	317772	H. sapiens	H2AC21	H2A clustered histone 21	GO:0006342 chromatin silencing;GO:0045814 negative regulation of gene expression, epigenetic;GO:0097549 chromatin organization involved in negative regulation of transcription		Predicted intracellular proteins	Nucleoplasm (Supported)				1.0	1.0	1.0	0.0	0.0	0.0	0.0	0.0	0.0	0.0	0.0	0.0	0.0	0.0	0.0	0.0	0.0	0.0	0.0	0.0
HIST2H2AC	8338	gene_synonym	H. sapiens	8338	H. sapiens	H2AC20	H2A clustered histone 20	GO:0006342 chromatin silencing;GO:0045814 negative regulation of gene expression, epigenetic;GO:0097549 chromatin organization involved in negative regulation of transcription		Predicted intracellular proteins	Nucleoplasm (Approved)				1.0	1.0	1.0	0.0	0.0	0.0	0.0	0.0	0.0	0.0	0.0	0.0	0.0	0.0	0.0	0.0	0.0	0.0	0.0	0.0
HIST2H2BE	8349	gene_synonym	H. sapiens	8349	H. sapiens	H2BC21	H2B clustered histone 21	GO:0002227 innate immune response in mucosa;GO:0002385 mucosal immune response;GO:0002251 organ or tissue specific immune response		Predicted intracellular proteins	Nucleoplasm (Approved); Additional: Cytosol				1.0	1.0	0.0	0.0	0.0	0.0	0.0	0.0	0.0	0.0	0.0	0.0	0.0	0.0	0.0	0.0	0.0	0.0	0.0	0.0
HIST2H2BF	440689	gene_synonym	H. sapiens	440689	H. sapiens	H2BC18	H2B clustered histone 18	GO:0006334 nucleosome assembly;GO:0034728 nucleosome organization;GO:0031497 chromatin assembly		Predicted intracellular proteins	Nucleoplasm (Approved); Additional: Cytosol				1.0	1.0	0.0	0.0	0.0	0.0	0.0	0.0	0.0	0.0	0.0	0.0	0.0	0.0	0.0	0.0	0.0	0.0	0.0	0.0
HIST2H3D	653604	gene_synonym	H. sapiens	653604	H. sapiens	H3C13	H3 clustered histone 13	GO:0006334 nucleosome assembly;GO:0034728 nucleosome organization;GO:0031497 chromatin assembly		Predicted intracellular proteins					1.0	0.0	1.0	0.0	0.0	0.0	0.0	0.0	0.0	0.0	0.0	0.0	0.0	0.0	0.0	0.0	0.0	0.0	0.0	0.0
HIST4H4	121504	gene_synonym	H. sapiens	121504	H. sapiens	H4-16	H4 histone 16	GO:0045653 negative regulation of megakaryocyte differentiation;GO:0006335 DNA replication-dependent nucleosome assembly;GO:0034723 DNA replication-dependent nucleosome organization		Predicted intracellular proteins; Disease related genes	Nucleoplasm (Supported)				1.0	0.0	0.0	0.0	0.0	0.0	0.0	0.0	0.0	0.0	0.0	0.0	0.0	0.0	0.0	0.0	0.0	0.0	0.0	0.0
HIVEP1	3096	symbol	H. sapiens	3096	H. sapiens	HIVEP1	HIVEP zinc finger 1	GO:0030509 BMP signaling pathway;GO:0071772 response to BMP;GO:0071773 cellular response to BMP stimulus		Transcription factors:Zinc-coordinating DNA-binding domains; Predicted intracellular proteins	Nucleoplasm (Supported); Additional: Cytosol;Mitochondria;Nuclear bodies				0.0	0.0	0.0	0.0	0.0	1.0	0.0	0.0	0.0	0.0	0.0	0.0	0.0	0.0	0.0	0.0	0.0	0.0	0.0	0.0
HMGA2	8091	symbol	H. sapiens	8091	H. sapiens	HMGA2	high mobility group AT-hook 2	GO:0003131 mesodermal-endodermal cell signaling;GO:2000685 positive regulation of cellular response to X-ray;GO:2000683 regulation of cellular response to X-ray		Cancer-related genes:Candidate cancer biomarkers; Predicted intracellular proteins; Disease related genes; Transcription factors:beta-Sheet binding to DNA	Nucleoli;Nucleoli rim;Nucleoplasm (Supported)				1.0	1.0	1.0	1.0	1.0	1.0	0.0	0.0	0.0	0.0	1.0	0.0	0.0	1.0	0.0	0.0	0.0	0.0	0.0	0.0
HOXD9	3235	symbol	H. sapiens	3235	H. sapiens	HOXD9	homeobox D9	GO:0048934 peripheral nervous system neuron differentiation;GO:0048935 peripheral nervous system neuron development;GO:0035115 embryonic forelimb morphogenesis		Predicted intracellular proteins; Transcription factors:Helix-turn-helix domains	Nucleoli;Nucleoplasm (Supported)				0.0	0.0	0.0	0.0	1.0	1.0	0.0	0.0	0.0	0.0	0.0	0.0	1.0	1.0	0.0	0.0	0.0	0.0	0.0	0.0
IGFBP2	3485	symbol	H. sapiens	3485	H. sapiens	IGFBP2	insulin like growth factor binding protein 2	GO:0010226 response to lithium ion;GO:0043567 regulation of insulin-like growth factor receptor signaling pathway;GO:0042104 positive regulation of activated T cell proliferation		Cancer-related genes:Candidate cancer biomarkers; Predicted intracellular proteins; Predicted secreted proteins	Endoplasmic reticulum (Approved)		(M3008)NABA ECM GLYCOPROTEINS; (M5884)NABA CORE MATRISOME; (M5889)NABA MATRISOME	(M5941)HALLMARK UV RESPONSE UP; (M5930)HALLMARK EPITHELIAL MESENCHYMAL TRANSITION; (M5956)HALLMARK KRAS SIGNALING DN	0.0	0.0	0.0	0.0	0.0	0.0	0.0	0.0	1.0	0.0	0.0	0.0	0.0	0.0	1.0	0.0	0.0	0.0	0.0	0.0
ITGA7	3679	symbol	H. sapiens	3679	H. sapiens	ITGA7	integrin subunit alpha 7	GO:0035987 endodermal cell differentiation;GO:0001706 endoderm formation;GO:0034113 heterotypic cell-cell adhesion		Predicted intracellular proteins; Disease related genes	Plasma membrane (Approved); Additional: Nuclear speckles;Vesicles		(M47)PID INTEGRIN CS PATHWAY; (M67)PID ARF6 TRAFFICKING PATHWAY; (M18)PID INTEGRIN1 PATHWAY	(M5905)HALLMARK ADIPOGENESIS; (M5909)HALLMARK MYOGENESIS	0.0	0.0	0.0	0.0	1.0	0.0	0.0	0.0	0.0	0.0	0.0	0.0	0.0	1.0	0.0	0.0	0.0	0.0	0.0	0.0
JAG1	182	symbol	H. sapiens	182	H. sapiens	JAG1	jagged canonical Notch ligand 1	GO:0061444 endocardial cushion cell development;GO:0061443 endocardial cushion cell differentiation;GO:0061073 ciliary body morphogenesis		Predicted intracellular proteins; Disease related genes; CD markers	Golgi apparatus;Plasma membrane (Approved)		(M256)PID TAP63 PATHWAY; (M17)PID NOTCH PATHWAY	(M5903)HALLMARK NOTCH SIGNALING; (M5944)HALLMARK ANGIOGENESIS; (M5895)HALLMARK WNT BETA CATENIN SIGNALING	1.0	0.0	0.0	0.0	1.0	0.0	0.0	1.0	1.0	0.0	1.0	0.0	1.0	1.0	0.0	1.0	0.0	1.0	1.0	0.0
KCNH1	3756	symbol	H. sapiens	3756	H. sapiens	KCNH1	potassium voltage-gated channel subfamily H member 1	GO:0001964 startle response;GO:0007520 myoblast fusion;GO:0000768 syncytium formation by plasma membrane fusion		Voltage-gated ion channels:Voltage-Gated Potassium Channels; Predicted intracellular proteins; Disease related genes; Transporters:Transporter channels and pores; Potential drug targets	Vesicles (Supported)	Imipramine; Astemizole		(M5909)HALLMARK MYOGENESIS	0.0	0.0	0.0	0.0	0.0	0.0	0.0	0.0	0.0	0.0	0.0	0.0	0.0	0.0	0.0	0.0	0.0	0.0	0.0	0.0
KCTD4	386618	symbol	H. sapiens	386618	H. sapiens	KCTD4	potassium channel tetramerization domain containing 4	GO:0051260 protein homooligomerization;GO:0051259 protein complex oligomerization;GO:0065003 protein-containing complex assembly		Predicted intracellular proteins	Centriolar satellite (Approved)				0.0	0.0	0.0	0.0	0.0	0.0	0.0	0.0	0.0	0.0	0.0	0.0	0.0	0.0	0.0	0.0	0.0	0.0	0.0	0.0
KDM5C	8242	symbol	H. sapiens	8242	H. sapiens	KDM5C	lysine demethylase 5C	GO:0034721 histone H3-K4 demethylation, trimethyl-H3-K4-specific;GO:0034720 histone H3-K4 demethylation;GO:0070076 histone lysine demethylation		Transcription factors:Helix-turn-helix domains; Cancer-related genes:Mutated cancer genes; Predicted intracellular proteins; Disease related genes; Cancer-related genes:Mutational cancer driver genes	Nucleoplasm (Enhanced); Additional: Cytosol				1.0	0.0	0.0	0.0	0.0	0.0	0.0	0.0	0.0	0.0	0.0	0.0	0.0	0.0	0.0	0.0	0.0	0.0	0.0	0.0
KIAA1217	56243	symbol	H. sapiens	56243	H. sapiens	KIAA1217	KIAA1217	GO:0048706 embryonic skeletal system development;GO:0001501 skeletal system development;GO:0043009 chordate embryonic development		Predicted intracellular proteins	Cytosol;Nucleoplasm (Approved)				0.0	0.0	0.0	0.0	1.0	1.0	0.0	0.0	0.0	0.0	0.0	0.0	0.0	0.0	0.0	0.0	0.0	0.0	0.0	0.0
KIF13A	63971	symbol	H. sapiens	63971	H. sapiens	KIF13A	kinesin family member 13A	GO:0072383 plus-end-directed vesicle transport along microtubule;GO:0072386 plus-end-directed organelle transport along microtubule;GO:0035459 vesicle cargo loading		Predicted intracellular proteins					0.0	0.0	0.0	0.0	0.0	0.0	0.0	0.0	0.0	0.0	0.0	0.0	0.0	0.0	0.0	0.0	0.0	0.0	0.0	0.0
KIF13B	23303	symbol	H. sapiens	23303	H. sapiens	KIF13B	kinesin family member 13B	GO:0050770 regulation of axonogenesis;GO:0006605 protein targeting;GO:0007018 microtubule-based movement		Predicted intracellular proteins			(M86)PID ARF6 PATHWAY	(M5939)HALLMARK P53 PATHWAY	0.0	0.0	1.0	0.0	0.0	0.0	0.0	0.0	0.0	0.0	0.0	1.0	0.0	0.0	0.0	0.0	0.0	0.0	0.0	0.0
LFNG	3955	symbol	H. sapiens	3955	H. sapiens	LFNG	LFNG O-fucosylpeptide 3-beta-N-acetylglucosaminyltransferase	GO:1902359 Notch signaling pathway involved in somitogenesis;GO:1902366 regulation of Notch signaling pathway involved in somitogenesis;GO:1902367 negative regulation of Notch signaling pathway involved in somitogenesis		ENZYME proteins:Transferases; Predicted intracellular proteins; Enzymes; Disease related genes; Potential drug targets				(M5903)HALLMARK NOTCH SIGNALING; (M5956)HALLMARK KRAS SIGNALING DN	1.0	0.0	0.0	0.0	1.0	0.0	0.0	0.0	0.0	0.0	0.0	0.0	1.0	1.0	0.0	0.0	0.0	0.0	0.0	0.0
LGR5	8549	symbol	H. sapiens	8549	H. sapiens	LGR5	leucine rich repeat containing G protein-coupled receptor 5	GO:2001013 epithelial cell proliferation involved in renal tubule morphogenesis;GO:0007190 activation of adenylate cyclase activity;GO:0009994 oocyte differentiation		G-protein coupled receptors:GPCRs excl olfactory receptors	Golgi apparatus (Approved); Additional: Nucleoplasm				1.0	0.0	0.0	0.0	1.0	0.0	0.0	1.0	0.0	0.0	0.0	0.0	0.0	0.0	0.0	1.0	0.0	1.0	1.0	1.0
LHX2	9355	symbol	H. sapiens	9355	H. sapiens	LHX2	LIM homeobox 2	GO:0035090 maintenance of apical/basal cell polarity;GO:0045199 maintenance of epithelial cell apical/basal polarity;GO:0021978 telencephalon regionalization		Predicted intracellular proteins; Transcription factors:Helix-turn-helix domains	Nucleoplasm (Approved)			(M5941)HALLMARK UV RESPONSE UP	1.0	1.0	0.0	0.0	1.0	0.0	0.0	1.0	0.0	0.0	0.0	1.0	1.0	1.0	0.0	1.0	0.0	0.0	0.0	0.0
LHX9	56956	symbol	H. sapiens	56956	H. sapiens	LHX9	LIM homeobox 9	GO:0097380 dorsal spinal cord interneuron anterior axon guidance;GO:0097378 dorsal spinal cord interneuron axon guidance;GO:0035262 gonad morphogenesis		Predicted intracellular proteins; Transcription factors:Helix-turn-helix domains	Nucleoplasm (Approved)			(M5937)HALLMARK GLYCOLYSIS	0.0	0.0	0.0	0.0	0.0	0.0	0.0	0.0	0.0	0.0	0.0	1.0	0.0	0.0	0.0	0.0	0.0	0.0	0.0	0.0
LIF	3976	symbol	H. sapiens	3976	H. sapiens	LIF	LIF interleukin 6 family cytokine	GO:1901676 positive regulation of histone H3-K27 acetylation;GO:0043974 histone H3-K27 acetylation;GO:1901674 regulation of histone H3-K27 acetylation		Cancer-related genes:Candidate cancer biomarkers; Predicted intracellular proteins; Predicted secreted proteins	Cytosol (Supported)		(M65)PID FRA PATHWAY; (M145)PID P53 DOWNSTREAM PATHWAY; (M5883)NABA SECRETED FACTORS	(M5947)HALLMARK IL2 STAT5 SIGNALING; (M5890)HALLMARK TNFA SIGNALING VIA NFKB; (M5932)HALLMARK INFLAMMATORY RESPONSE	1.0	0.0	1.0	1.0	1.0	0.0	0.0	0.0	1.0	0.0	0.0	1.0	0.0	0.0	1.0	0.0	0.0	1.0	0.0	0.0
LIMD1	8994	symbol	H. sapiens	8994	H. sapiens	LIMD1	LIM domain containing 1	GO:0035331 negative regulation of hippo signaling;GO:0002076 osteoblast development;GO:0035330 regulation of hippo signaling		Predicted intracellular proteins	Focal adhesion sites;Nucleoplasm (Supported)				1.0	0.0	1.0	0.0	0.0	0.0	0.0	0.0	0.0	0.0	0.0	0.0	0.0	0.0	0.0	0.0	0.0	0.0	1.0	0.0
LOC100499194	100499194	Gene_ID	H. sapiens	100499194	H. sapiens	LOC100499194	uncharacterized LOC100499194								0.0	0.0	0.0	0.0	0.0	0.0	0.0	0.0	0.0	0.0	0.0	0.0	0.0	0.0	0.0	0.0	0.0	0.0	0.0	0.0
LOC102724434	102724434	Gene_ID	H. sapiens	102724434	H. sapiens	LOC102724434	uncharacterized LOC102724434								0.0	0.0	0.0	0.0	0.0	0.0	0.0	0.0	0.0	0.0	0.0	0.0	0.0	0.0	0.0	0.0	0.0	0.0	0.0	0.0
LONRF2	164832	symbol	H. sapiens	164832	H. sapiens	LONRF2	LON peptidase N-terminal domain and ring finger 2			Predicted intracellular proteins	Nucleoplasm (Approved)				0.0	0.0	0.0	0.0	0.0	0.0	0.0	0.0	0.0	0.0	0.0	0.0	0.0	0.0	0.0	0.0	0.0	0.0	0.0	0.0
LOXL3	84695	symbol	H. sapiens	84695	H. sapiens	LOXL3	lysyl oxidase like 3	GO:1905590 fibronectin fibril organization;GO:2000329 negative regulation of T-helper 17 cell lineage commitment;GO:0018057 peptidyl-lysine oxidation		Predicted intracellular proteins; Predicted secreted proteins; Enzymes; ENZYME proteins:Oxidoreductases; Disease related genes; Potential drug targets			(M3468)NABA ECM REGULATORS; (M5885)NABA MATRISOME ASSOCIATED; (M5889)NABA MATRISOME		1.0	0.0	0.0	0.0	0.0	0.0	0.0	0.0	1.0	0.0	0.0	0.0	1.0	1.0	0.0	0.0	0.0	0.0	0.0	0.0
LRRN4CL	221091	symbol	H. sapiens	221091	H. sapiens	LRRN4CL	LRRN4 C-terminal like				Nucleoplasm (Approved); Additional: Nuclear bodies				0.0	0.0	0.0	0.0	0.0	0.0	0.0	0.0	0.0	0.0	0.0	0.0	0.0	0.0	0.0	0.0	0.0	0.0	0.0	0.0
LRRTM2	26045	symbol	H. sapiens	26045	H. sapiens	LRRTM2	leucine rich repeat transmembrane neuronal 2	GO:0099151 regulation of postsynaptic density assembly;GO:0099150 regulation of postsynaptic specialization assembly;GO:0002091 negative regulation of receptor internalization		Predicted intracellular proteins					0.0	0.0	0.0	0.0	0.0	0.0	0.0	0.0	0.0	0.0	0.0	1.0	0.0	0.0	0.0	0.0	0.0	0.0	0.0	0.0
LYPD6B	130576	symbol	H. sapiens	130576	H. sapiens	LYPD6B	LY6/PLAUR domain containing 6B			Predicted intracellular proteins; Transporters:Accessory Factors Involved in Transport					0.0	0.0	0.0	0.0	0.0	0.0	0.0	0.0	0.0	0.0	0.0	0.0	0.0	0.0	0.0	0.0	0.0	0.0	0.0	0.0
LZTR1	8216	symbol	H. sapiens	8216	H. sapiens	LZTR1	leucine zipper like transcription regulator 1	GO:0046580 negative regulation of Ras protein signal transduction;GO:0051058 negative regulation of small GTPase mediated signal transduction;GO:0046578 regulation of Ras protein signal transduction		Cancer-related genes:Mutational cancer driver genes; Disease related genes; Predicted intracellular proteins	Nucleoplasm (Approved); Additional: Centrosome;Cytosol				1.0	0.0	0.0	0.0	0.0	0.0	1.0	0.0	0.0	0.0	0.0	0.0	0.0	0.0	0.0	0.0	0.0	0.0	0.0	0.0
LZTS1	11178	symbol	H. sapiens	11178	H. sapiens	LZTS1	leucine zipper tumor suppressor 1	GO:0016242 negative regulation of macroautophagy;GO:0048814 regulation of dendrite morphogenesis;GO:0010507 negative regulation of autophagy		Predicted intracellular proteins; Disease related genes	Plasma membrane (Approved); Additional: Nucleoli				0.0	0.0	0.0	0.0	0.0	0.0	0.0	0.0	0.0	0.0	0.0	1.0	0.0	0.0	0.0	0.0	0.0	0.0	0.0	0.0
MAB21L2	10586	symbol	H. sapiens	10586	H. sapiens	MAB21L2	mab-21 like 2	GO:0010172 embryonic body morphogenesis;GO:0010171 body morphogenesis;GO:0043010 camera-type eye development		Predicted intracellular proteins; Disease related genes	Nucleoplasm (Enhanced)				0.0	0.0	0.0	0.0	1.0	0.0	0.0	1.0	0.0	0.0	0.0	0.0	0.0	0.0	0.0	0.0	0.0	0.0	0.0	0.0
MAF	4094	symbol	H. sapiens	4094	H. sapiens	MAF	MAF bZIP transcription factor	GO:0070306 lens fiber cell differentiation;GO:0032330 regulation of chondrocyte differentiation;GO:0061035 regulation of cartilage development		Predicted intracellular proteins; Disease related genes; Transcription factors:Basic domains; Cancer-related genes			(M60)PID NFAT TFPATHWAY; (M167)PID AP1 PATHWAY; (M195)PID CMYB PATHWAY	(M5908)HALLMARK ANDROGEN RESPONSE	0.0	0.0	1.0	0.0	0.0	1.0	0.0	1.0	0.0	0.0	0.0	0.0	0.0	0.0	0.0	0.0	0.0	0.0	1.0	0.0
MAP3K5	4217	symbol	H. sapiens	4217	H. sapiens	MAP3K5	mitogen-activated protein kinase kinase kinase 5	GO:0010663 positive regulation of striated muscle cell apoptotic process;GO:0010666 positive regulation of cardiac muscle cell apoptotic process;GO:1900745 positive regulation of p38MAPK cascade	STE Ser/Thr protein kinase family	ENZYME proteins:Transferases; Predicted intracellular proteins; Kinases:STE Ser/Thr protein kinases; Enzymes	Cytosol (Supported)		(M20)PID P38 MKK3 6PATHWAY; (M197)PID HIV NEF PATHWAY; (M249)PID PI3KCI AKT PATHWAY		1.0	0.0	0.0	0.0	0.0	0.0	0.0	0.0	0.0	0.0	0.0	0.0	0.0	0.0	0.0	0.0	0.0	0.0	0.0	1.0
MBNL1-AS1	401093	symbol	H. sapiens	401093	H. sapiens	MBNL1-AS1	MBNL1 antisense RNA 1								0.0	0.0	0.0	0.0	0.0	0.0	0.0	0.0	0.0	0.0	0.0	0.0	0.0	0.0	0.0	0.0	0.0	0.0	0.0	0.0
MEOX2	4223	symbol	H. sapiens	4223	H. sapiens	MEOX2	mesenchyme homeobox 2	GO:0001757 somite specification;GO:0007379 segment specification;GO:0090051 negative regulation of cell migration involved in sprouting angiogenesis		Predicted intracellular proteins; Transcription factors:Helix-turn-helix domains					0.0	0.0	0.0	0.0	1.0	0.0	0.0	0.0	0.0	0.0	1.0	0.0	1.0	1.0	0.0	0.0	0.0	0.0	0.0	0.0
MICU3	286097	symbol	H. sapiens	286097	H. sapiens	MICU3	mitochondrial calcium uptake family member 3	GO:0036444 calcium import into the mitochondrion;GO:0006851 mitochondrial calcium ion transmembrane transport;GO:0051560 mitochondrial calcium ion homeostasis		Predicted intracellular proteins					0.0	0.0	0.0	0.0	0.0	0.0	0.0	0.0	0.0	0.0	0.0	0.0	0.0	0.0	0.0	0.0	0.0	0.0	0.0	0.0
MIR4532						None	None	None	None	None	None	None	None	None	nan	nan	nan	nan	nan	nan	nan	nan	nan	nan	nan	nan	nan	nan	nan	nan	nan	nan	nan	nan
MIR663AHG	284801	symbol	H. sapiens	284801	H. sapiens	MIR663AHG	MIR663A host gene								0.0	0.0	0.0	0.0	0.0	0.0	0.0	0.0	0.0	0.0	0.0	0.0	0.0	0.0	0.0	0.0	0.0	0.0	0.0	0.0
MTRNR2L1	100462977	symbol	H. sapiens	100462977	H. sapiens	MTRNR2L1	MT-RNR2 like 1	GO:1900118 negative regulation of execution phase of apoptosis;GO:1900117 regulation of execution phase of apoptosis;GO:2000272 negative regulation of signaling receptor activity		Predicted intracellular proteins; Predicted secreted proteins					0.0	0.0	0.0	0.0	0.0	0.0	0.0	0.0	0.0	0.0	0.0	0.0	0.0	0.0	0.0	0.0	0.0	0.0	0.0	0.0
MYO1B	4430	symbol	H. sapiens	4430	H. sapiens	MYO1B	myosin IB	GO:0030050 vesicle transport along actin filament;GO:0099515 actin filament-based transport;GO:0099518 vesicle cytoskeletal trafficking		Predicted intracellular proteins	Plasma membrane (Enhanced)				0.0	0.0	0.0	0.0	0.0	0.0	0.0	0.0	0.0	0.0	0.0	0.0	0.0	0.0	0.0	0.0	0.0	0.0	0.0	0.0
MYRIP	25924	symbol	H. sapiens	25924	H. sapiens	MYRIP	myosin VIIA and Rab interacting protein	GO:0032024 positive regulation of insulin secretion;GO:0090277 positive regulation of peptide hormone secretion;GO:0002793 positive regulation of peptide secretion		Predicted intracellular proteins	Golgi apparatus;Nucleoli fibrillar center;Nucleoplasm (Approved)				0.0	0.0	0.0	0.0	0.0	0.0	0.0	0.0	0.0	0.0	0.0	0.0	0.0	0.0	0.0	0.0	0.0	0.0	0.0	0.0
NEFL	4747	symbol	H. sapiens	4747	H. sapiens	NEFL	neurofilament light chain	GO:0045105 intermediate filament polymerization or depolymerization;GO:1903937 response to acrylamide;GO:0033693 neurofilament bundle assembly		Predicted intracellular proteins; Disease related genes	Intermediate filaments;Nucleoplasm (Approved); Additional: Midbody				0.0	0.0	0.0	0.0	0.0	0.0	0.0	0.0	0.0	0.0	0.0	1.0	0.0	0.0	0.0	0.0	0.0	0.0	0.0	1.0
NEFM	4741	symbol	H. sapiens	4741	H. sapiens	NEFM	neurofilament medium chain	GO:0033693 neurofilament bundle assembly;GO:0045110 intermediate filament bundle assembly;GO:0045109 intermediate filament organization		Predicted intracellular proteins	Intermediate filaments (Enhanced)				0.0	0.0	0.0	0.0	0.0	0.0	0.0	0.0	0.0	0.0	0.0	0.0	0.0	0.0	0.0	0.0	0.0	0.0	0.0	0.0
NLGN4X	57502	symbol	H. sapiens	57502	H. sapiens	NLGN4X	neuroligin 4 X-linked	GO:0003360 brainstem development;GO:0097105 presynaptic membrane assembly;GO:0090394 negative regulation of excitatory postsynaptic potential		Predicted intracellular proteins; Disease related genes					0.0	0.0	0.0	0.0	0.0	0.0	0.0	0.0	0.0	0.0	0.0	1.0	0.0	0.0	0.0	0.0	0.0	0.0	0.0	0.0
NLRP10	338322	symbol	H. sapiens	338322	H. sapiens	NLRP10	NLR family pyrin domain containing 10	GO:0032730 positive regulation of interleukin-1 alpha production;GO:1900426 positive regulation of defense response to bacterium;GO:0032610 interleukin-1 alpha production		Predicted intracellular proteins	Nucleoplasm (Approved); Additional: Nuclear membrane				0.0	0.0	0.0	0.0	0.0	0.0	0.0	0.0	0.0	0.0	0.0	0.0	0.0	0.0	0.0	0.0	0.0	0.0	0.0	0.0
NOS1	4842	symbol	H. sapiens	4842	H. sapiens	NOS1	nitric oxide synthase 1	GO:0098923 retrograde trans-synaptic signaling by soluble gas;GO:0098924 retrograde trans-synaptic signaling by nitric oxide;GO:0051581 negative regulation of neurotransmitter uptake		Cancer-related genes:Candidate cancer biomarkers; Predicted intracellular proteins; FDA approved drug targets:Small molecule drugs; Enzymes; ENZYME proteins:Oxidoreductases	Plasma membrane (Supported); Additional: Nucleoplasm	Citrulline; Donepezil; Ketamine; L-N(omega)-Nitroarginine-2,4-L-diaminobutyric amide; Formic acid; 3-Bromo-7-Nitroindazole; N-{(4S)-4-Amino-5-[(2-aminoethyl)amino]pentyl}-N'-nitroguanidine; N-[3-(aminomethyl)benzyl]acetamidine; L-N(omega)-nitroarginine-(4R)-amino-L-proline amide; 1-hydroxy-2-isopropylguanidine; N-omega-propyl-L-arginine; 2-butyl-1-hydroxyguanidine; S-Ethyl-N-[4-(Trifluoromethyl)P…		(M5951)HALLMARK SPERMATOGENESIS; (M5909)HALLMARK MYOGENESIS; (M5956)HALLMARK KRAS SIGNALING DN	0.0	0.0	1.0	1.0	0.0	1.0	0.0	0.0	0.0	0.0	0.0	0.0	0.0	0.0	0.0	0.0	0.0	1.0	0.0	0.0
NPAP1	23742	symbol	H. sapiens	23742	H. sapiens	NPAP1	nuclear pore associated protein 1	GO:0006405 RNA export from nucleus;GO:0006606 protein import into nucleus;GO:0051168 nuclear export		Transporters:Transporter channels and pores; Predicted intracellular proteins					0.0	0.0	0.0	0.0	0.0	0.0	0.0	0.0	0.0	0.0	0.0	0.0	0.0	0.0	0.0	0.0	0.0	0.0	0.0	0.0
NPTX1	4884	symbol	H. sapiens	4884	H. sapiens	NPTX1	neuronal pentraxin 1	GO:0060385 axonogenesis involved in innervation;GO:0098962 regulation of postsynaptic neurotransmitter receptor activity;GO:0060384 innervation		Transporters:Transporter channels and pores; Predicted secreted proteins					0.0	0.0	0.0	0.0	0.0	0.0	0.0	0.0	0.0	0.0	0.0	1.0	0.0	0.0	0.0	0.0	0.0	0.0	0.0	0.0
NTN4	59277	symbol	H. sapiens	59277	H. sapiens	NTN4	netrin 4	GO:0060668 regulation of branching involved in salivary gland morphogenesis by extracellular matrix-epithelial cell signaling;GO:0035426 extracellular matrix-cell signaling;GO:0060693 regulation of branching involved in salivary gland morphogenesis		Cancer-related genes:Mutated cancer genes; Predicted intracellular proteins; Predicted secreted proteins			(M5887)NABA BASEMENT MEMBRANES; (M3008)NABA ECM GLYCOPROTEINS; (M5884)NABA CORE MATRISOME		0.0	0.0	0.0	0.0	1.0	0.0	0.0	0.0	0.0	0.0	0.0	1.0	1.0	0.0	0.0	0.0	0.0	0.0	0.0	0.0
NTRK2	4915	symbol	H. sapiens	4915	H. sapiens	NTRK2	neurotrophic receptor tyrosine kinase 2	GO:0099540 trans-synaptic signaling by neuropeptide;GO:0099551 trans-synaptic signaling by neuropeptide, modulating synaptic transmission;GO:0099183 trans-synaptic signaling by BDNF, modulating synaptic transmission	Tyr protein kinase family	Cancer-related genes:Candidate cancer biomarkers; ENZYME proteins:Transferases; Kinases:Tyr protein kinases; RAS pathway related proteins; Enzymes; Disease related genes; Potential drug targets	Cytosol (Approved)	Amitriptyline; Esketamine; Entrectinib; Fostamatinib; Larotrectinib	(M142)PID AJDISS 2PATHWAY; (M100)PID SHP2 PATHWAY; (M187)PID TRKR PATHWAY		1.0	0.0	0.0	0.0	0.0	1.0	0.0	1.0	0.0	0.0	1.0	1.0	1.0	0.0	1.0	0.0	0.0	0.0	0.0	0.0
NUTM2D	728130	symbol	H. sapiens	728130	H. sapiens	NUTM2D	NUT family member 2D			Predicted intracellular proteins	Nuclear bodies (Approved)				0.0	0.0	0.0	0.0	0.0	0.0	0.0	0.0	0.0	0.0	0.0	0.0	0.0	0.0	0.0	0.0	0.0	0.0	0.0	0.0
PADI2	11240	symbol	H. sapiens	11240	H. sapiens	PADI2	peptidyl arginine deiminase 2	GO:0010848 regulation of chromatin disassembly;GO:0036413 histone H3-R26 citrullination;GO:1901624 negative regulation of lymphocyte chemotaxis		Predicted intracellular proteins; ENZYME proteins:Hydrolases; Enzymes		Citrulline			1.0	1.0	0.0	1.0	0.0	0.0	0.0	0.0	0.0	0.0	1.0	1.0	0.0	0.0	0.0	0.0	1.0	0.0	0.0	0.0
PCDH19	57526	symbol	H. sapiens	57526	H. sapiens	PCDH19	protocadherin 19	GO:0007156 homophilic cell adhesion via plasma membrane adhesion molecules;GO:0098742 cell-cell adhesion via plasma-membrane adhesion molecules;GO:0007420 brain development		Predicted intracellular proteins; Disease related genes	Cytosol (Approved)	Calcium			0.0	0.0	0.0	0.0	0.0	0.0	0.0	0.0	0.0	0.0	0.0	1.0	0.0	0.0	0.0	0.0	0.0	0.0	0.0	0.0
PDE6B	5158	symbol	H. sapiens	5158	H. sapiens	PDE6B	phosphodiesterase 6B	GO:1990009 retinal cell apoptotic process;GO:0007603 phototransduction, visible light;GO:0043153 entrainment of circadian clock by photoperiod		Predicted intracellular proteins; FDA approved drug targets:Small molecule drugs; ENZYME proteins:Hydrolases; Enzymes; Disease related genes	Cytosol (Approved)		(M16518)ST WNT CA2 CYCLIC GMP PATHWAY; (M204)PID RHODOPSIN PATHWAY	(M5956)HALLMARK KRAS SIGNALING DN	1.0	0.0	0.0	0.0	0.0	0.0	0.0	1.0	0.0	0.0	0.0	0.0	0.0	0.0	0.0	0.0	0.0	0.0	0.0	0.0
PEG3	5178	symbol	H. sapiens	5178	H. sapiens	PEG3	paternally expressed 3	GO:0000122 negative regulation of transcription by RNA polymerase II;GO:0045944 positive regulation of transcription by RNA polymerase II;GO:0045892 negative regulation of transcription, DNA-templated		Transcription factors:Zinc-coordinating DNA-binding domains; Predicted intracellular proteins	Nucleoplasm (Approved)			(M5953)HALLMARK KRAS SIGNALING UP	0.0	0.0	0.0	0.0	0.0	0.0	0.0	0.0	0.0	0.0	0.0	0.0	0.0	0.0	0.0	0.0	0.0	0.0	0.0	0.0
PGAM1P5	100132594	symbol	H. sapiens	100132594	H. sapiens	PGAM1P5	phosphoglycerate mutase 1 pseudogene 5								0.0	0.0	0.0	0.0	0.0	0.0	0.0	0.0	0.0	0.0	0.0	0.0	0.0	0.0	0.0	0.0	0.0	0.0	0.0	0.0
PHC2	1912	symbol	H. sapiens	1912	H. sapiens	PHC2	polyhomeotic homolog 2	GO:0045892 negative regulation of transcription, DNA-templated;GO:1903507 negative regulation of nucleic acid-templated transcription;GO:1902679 negative regulation of RNA biosynthetic process		Predicted intracellular proteins	Nucleoplasm (Supported)				1.0	0.0	0.0	0.0	0.0	0.0	0.0	0.0	0.0	0.0	0.0	0.0	0.0	0.0	0.0	0.0	0.0	0.0	0.0	0.0
PIGM	93183	symbol	H. sapiens	93183	H. sapiens	PIGM	phosphatidylinositol glycan anchor biosynthesis class M	GO:0006506 GPI anchor biosynthetic process;GO:0006505 GPI anchor metabolic process;GO:0097502 mannosylation		Disease related genes					0.0	0.0	0.0	0.0	0.0	0.0	0.0	0.0	0.0	0.0	0.0	0.0	0.0	0.0	0.0	0.0	0.0	0.0	0.0	0.0
PLCB1	23236	symbol	H. sapiens	23236	H. sapiens	PLCB1	phospholipase C beta 1	GO:0060466 activation of meiosis involved in egg activation;GO:2000438 negative regulation of monocyte extravasation;GO:0035724 CD24 biosynthetic process		Predicted intracellular proteins; ENZYME proteins:Hydrolases; Enzymes; Disease related genes; Potential drug targets	Plasma membrane (Approved)		(M252)PID IL8 CXCR1 PATHWAY; (M213)PID AR NONGENOMIC PATHWAY; (M210)PID IL8 CXCR2 PATHWAY	(M5923)HALLMARK PI3K AKT MTOR SIGNALING	1.0	0.0	0.0	0.0	0.0	0.0	1.0	0.0	0.0	0.0	1.0	1.0	0.0	0.0	1.0	0.0	0.0	1.0	0.0	0.0
PLCH2	9651	symbol	H. sapiens	9651	H. sapiens	PLCH2	phospholipase C eta 2	GO:0046488 phosphatidylinositol metabolic process;GO:0048015 phosphatidylinositol-mediated signaling;GO:0048017 inositol lipid-mediated signaling		Predicted intracellular proteins; ENZYME proteins:Hydrolases; Enzymes					0.0	0.0	0.0	0.0	0.0	0.0	0.0	0.0	0.0	0.0	0.0	0.0	0.0	0.0	0.0	0.0	0.0	0.0	0.0	0.0
PLXDC1	57125	symbol	H. sapiens	57125	H. sapiens	PLXDC1	plexin domain containing 1	GO:0021510 spinal cord development;GO:0001525 angiogenesis;GO:0048514 blood vessel morphogenesis		Predicted intracellular proteins			(M5880)NABA ECM AFFILIATED; (M5885)NABA MATRISOME ASSOCIATED; (M5889)NABA MATRISOME		0.0	0.0	0.0	0.0	0.0	0.0	0.0	0.0	0.0	0.0	1.0	0.0	0.0	0.0	0.0	0.0	0.0	0.0	0.0	0.0
PLXND1	23129	symbol	H. sapiens	23129	H. sapiens	PLXND1	plexin D1	GO:0060666 dichotomous subdivision of terminal units involved in salivary gland branching;GO:0060600 dichotomous subdivision of an epithelial terminal unit;GO:1902287 semaphorin-plexin signaling pathway involved in axon guidance		Predicted intracellular proteins			(M5880)NABA ECM AFFILIATED; (M5885)NABA MATRISOME ASSOCIATED; (M5889)NABA MATRISOME		1.0	0.0	0.0	0.0	1.0	0.0	0.0	0.0	1.0	0.0	1.0	1.0	1.0	0.0	0.0	0.0	0.0	0.0	0.0	0.0
PPM1H	57460	symbol	H. sapiens	57460	H. sapiens	PPM1H	protein phosphatase, Mg2+/Mn2+ dependent 1H	GO:0006470 protein dephosphorylation;GO:0016311 dephosphorylation;GO:0006796 phosphate-containing compound metabolic process		Predicted intracellular proteins; ENZYME proteins:Hydrolases; Enzymes	Nucleoplasm (Supported)				0.0	0.0	0.0	0.0	0.0	0.0	0.0	0.0	0.0	0.0	0.0	0.0	0.0	0.0	0.0	0.0	0.0	0.0	0.0	0.0
PPP1R14A	94274	symbol	H. sapiens	94274	H. sapiens	PPP1R14A	protein phosphatase 1 regulatory inhibitor subunit 14A	GO:0043086 negative regulation of catalytic activity;GO:0044092 negative regulation of molecular function;GO:0042325 regulation of phosphorylation		Predicted intracellular proteins	Nucleoplasm (Supported); Additional: Nuclear bodies		(M71)PID ILK PATHWAY		1.0	0.0	0.0	0.0	0.0	0.0	0.0	0.0	0.0	0.0	0.0	0.0	0.0	0.0	0.0	0.0	0.0	1.0	0.0	0.0
PPP2R2B	5521	symbol	H. sapiens	5521	H. sapiens	PPP2R2B	protein phosphatase 2 regulatory subunit Bbeta	GO:0070262 peptidyl-serine dephosphorylation;GO:0006470 protein dephosphorylation;GO:0016311 dephosphorylation		Predicted intracellular proteins; Disease related genes	Cytosol (Uncertain)		(M46)PID ATR PATHWAY; (M186)PID PDGFRB PATHWAY		0.0	0.0	0.0	0.0	0.0	0.0	0.0	0.0	0.0	0.0	0.0	0.0	0.0	0.0	0.0	0.0	0.0	1.0	1.0	0.0
PRSS12	8492	symbol	H. sapiens	8492	H. sapiens	PRSS12	serine protease 12	GO:0031638 zymogen activation;GO:0016485 protein processing;GO:0051604 protein maturation		Predicted secreted proteins; Peptidases:Serine-type peptidases; Enzymes; Disease related genes; Potential drug targets	Actin filaments (Approved); Additional: Nucleoplasm		(M3468)NABA ECM REGULATORS; (M5885)NABA MATRISOME ASSOCIATED; (M5889)NABA MATRISOME		0.0	0.0	0.0	0.0	0.0	0.0	0.0	0.0	0.0	0.0	0.0	0.0	0.0	0.0	0.0	0.0	0.0	0.0	0.0	0.0
PRTG	283659	symbol	H. sapiens	283659	H. sapiens	PRTG	protogenin	GO:0050768 negative regulation of neurogenesis;GO:0051961 negative regulation of nervous system development;GO:0010721 negative regulation of cell development		Predicted intracellular proteins	Cytosol (Approved); Additional: Plasma membrane;Vesicles				1.0	0.0	0.0	0.0	0.0	0.0	0.0	0.0	0.0	0.0	0.0	1.0	0.0	0.0	0.0	0.0	0.0	0.0	0.0	0.0
PTBP3	9991	symbol	H. sapiens	9991	H. sapiens	PTBP3	polypyrimidine tract binding protein 3	GO:0043249 erythrocyte maturation;GO:0033119 negative regulation of RNA splicing;GO:0048821 erythrocyte development		Predicted intracellular proteins	Nucleoplasm (Approved)				1.0	0.0	0.0	0.0	0.0	0.0	0.0	0.0	0.0	0.0	0.0	0.0	0.0	0.0	0.0	0.0	0.0	0.0	0.0	0.0
RAP1GAP2	23108	symbol	H. sapiens	23108	H. sapiens	RAP1GAP2	RAP1 GTPase activating protein 2	GO:0090630 activation of GTPase activity;GO:0008361 regulation of cell size;GO:0043547 positive regulation of GTPase activity		Predicted intracellular proteins	Cytosol;Nuclear membrane (Supported)				0.0	0.0	0.0	0.0	0.0	0.0	1.0	0.0	0.0	0.0	0.0	0.0	0.0	0.0	0.0	0.0	0.0	0.0	0.0	0.0
RASGRP1	10125	symbol	H. sapiens	10125	H. sapiens	RASGRP1	RAS guanyl releasing protein 1	GO:0032825 positive regulation of natural killer cell differentiation;GO:0033089 positive regulation of T cell differentiation in thymus;GO:0032823 regulation of natural killer cell differentiation		Predicted intracellular proteins; Disease related genes; RAS pathway related proteins	Cytosol (Supported); Additional: Plasma membrane		(M269)PID RAS PATHWAY; (M9526)ST T CELL SIGNAL TRANSDUCTION; (M88)PID CD8 TCR PATHWAY	(M5941)HALLMARK UV RESPONSE UP; (M5906)HALLMARK ESTROGEN RESPONSE EARLY; (M5921)HALLMARK COMPLEMENT	1.0	0.0	1.0	0.0	0.0	0.0	1.0	0.0	1.0	0.0	0.0	0.0	0.0	0.0	1.0	0.0	0.0	1.0	0.0	0.0
RBMS2	5939	symbol	H. sapiens	5939	H. sapiens	RBMS2	RNA binding motif single stranded interacting protein 2	GO:0006396 RNA processing;GO:0016070 RNA metabolic process;GO:0090304 nucleic acid metabolic process		Predicted intracellular proteins	Nucleoli fibrillar center (Approved); Additional: Cytosol;Nucleoplasm				0.0	0.0	0.0	0.0	0.0	0.0	0.0	0.0	0.0	0.0	0.0	0.0	0.0	0.0	0.0	0.0	0.0	0.0	0.0	0.0
RBMXL2	27288	symbol	H. sapiens	27288	H. sapiens	RBMXL2	RBMX like 2	GO:0000377 RNA splicing, via transesterification reactions with bulged adenosine as nucleophile;GO:0000398 mRNA splicing, via spliceosome;GO:0000375 RNA splicing, via transesterification reactions		Predicted intracellular proteins					0.0	0.0	0.0	0.0	0.0	0.0	0.0	0.0	0.0	0.0	0.0	0.0	0.0	0.0	0.0	0.0	0.0	0.0	0.0	0.0
REEP3	221035	symbol	H. sapiens	221035	H. sapiens	REEP3	receptor accessory protein 3	GO:0007084 mitotic nuclear membrane reassembly;GO:0101024 mitotic nuclear membrane organization;GO:0031468 nuclear membrane reassembly							0.0	0.0	0.0	0.0	0.0	0.0	0.0	0.0	0.0	0.0	0.0	0.0	0.0	0.0	0.0	0.0	0.0	0.0	0.0	0.0
RELN	5649	symbol	H. sapiens	5649	H. sapiens	RELN	reelin	GO:1902076 regulation of lateral motor column neuron migration;GO:1902078 positive regulation of lateral motor column neuron migration;GO:1905483 regulation of motor neuron migration		Predicted intracellular proteins; Predicted secreted proteins; Disease related genes	Golgi apparatus (Approved); Additional: Vesicles		(M69)PID REELIN PATHWAY; (M163)PID LIS1 PATHWAY; (M3008)NABA ECM GLYCOPROTEINS	(M5953)HALLMARK KRAS SIGNALING UP	1.0	0.0	0.0	0.0	0.0	0.0	1.0	0.0	0.0	0.0	0.0	1.0	0.0	1.0	1.0	0.0	0.0	0.0	0.0	1.0
REPS2	9185	symbol	H. sapiens	9185	H. sapiens	REPS2	RALBP1 associated Eps domain containing 2	GO:0007173 epidermal growth factor receptor signaling pathway;GO:0038127 ERBB signaling pathway;GO:0016197 endosomal transport		Predicted intracellular proteins					0.0	0.0	0.0	0.0	0.0	0.0	0.0	0.0	0.0	0.0	0.0	0.0	0.0	0.0	1.0	0.0	0.0	0.0	0.0	0.0
RHOB	388	symbol	H. sapiens	388	H. sapiens	RHOB	ras homolog family member B	GO:0003159 morphogenesis of an endothelium;GO:0061154 endothelial tube morphogenesis;GO:0008333 endosome to lysosome transport		Cancer-related genes:Candidate cancer biomarkers; Predicted intracellular proteins		Botulinum toxin type A	(M153)PID P75 NTR PATHWAY; (M124)PID CXCR4 PATHWAY	(M5941)HALLMARK UV RESPONSE UP; (M5902)HALLMARK APOPTOSIS; (M5947)HALLMARK IL2 STAT5 SIGNALING	1.0	0.0	1.0	0.0	1.0	0.0	1.0	0.0	0.0	0.0	1.0	1.0	0.0	0.0	0.0	0.0	0.0	0.0	0.0	1.0
RMRP	6023	symbol	H. sapiens	6023	H. sapiens	RMRP	RNA component of mitochondrial RNA processing endoribonuclease	GO:0062103 double-stranded RNA biosynthetic process;GO:1903704 negative regulation of production of siRNA involved in RNA interference;GO:1900369 negative regulation of RNA interference							0.0	0.0	1.0	1.0	0.0	0.0	0.0	0.0	0.0	0.0	0.0	0.0	0.0	0.0	0.0	0.0	0.0	0.0	0.0	0.0
ROBO1	6091	symbol	H. sapiens	6091	H. sapiens	ROBO1	roundabout guidance receptor 1	GO:0021823 cerebral cortex tangential migration using cell-cell interactions;GO:0021825 substrate-dependent cerebral cortex tangential migration;GO:0021827 postnatal olfactory bulb interneuron migration		Predicted intracellular proteins	Plasma membrane (Enhanced)		(M142)PID AJDISS 2PATHWAY		0.0	0.0	0.0	0.0	1.0	1.0	1.0	0.0	0.0	0.0	1.0	1.0	1.0	1.0	1.0	0.0	1.0	0.0	0.0	1.0
RPPH1	85495	symbol	H. sapiens	85495	H. sapiens	RPPH1	ribonuclease P RNA component H1	GO:0090502 RNA phosphodiester bond hydrolysis, endonucleolytic;GO:0008033 tRNA processing;GO:0090501 RNA phosphodiester bond hydrolysis							0.0	0.0	0.0	0.0	0.0	0.0	0.0	0.0	0.0	0.0	0.0	0.0	0.0	0.0	0.0	0.0	0.0	0.0	0.0	0.0
RTL1	388015	symbol	H. sapiens	388015	H. sapiens	RTL1	retrotransposon Gag like 1				Cytosol (Approved)				0.0	0.0	0.0	0.0	0.0	0.0	0.0	0.0	0.0	0.0	0.0	0.0	0.0	0.0	0.0	0.0	0.0	0.0	0.0	0.0
SCAP	22937	symbol	H. sapiens	22937	H. sapiens	SCAP	SREBF chaperone	GO:0045541 negative regulation of cholesterol biosynthetic process;GO:0090206 negative regulation of cholesterol metabolic process;GO:0106119 negative regulation of sterol biosynthetic process					(M7997)SA CASPASE CASCADE		0.0	0.0	0.0	0.0	0.0	0.0	0.0	0.0	0.0	0.0	0.0	0.0	0.0	0.0	0.0	0.0	0.0	0.0	0.0	0.0
SCARNA10	692148	symbol	H. sapiens	692148	H. sapiens	SCARNA10	small Cajal body-specific RNA 10	GO:0006396 RNA processing;GO:0016070 RNA metabolic process;GO:0090304 nucleic acid metabolic process							0.0	0.0	0.0	0.0	0.0	0.0	0.0	0.0	0.0	0.0	0.0	0.0	0.0	0.0	0.0	0.0	0.0	0.0	0.0	0.0
SCARNA12	677777	symbol	H. sapiens	677777	H. sapiens	SCARNA12	small Cajal body-specific RNA 12	GO:0006396 RNA processing;GO:0016070 RNA metabolic process;GO:0090304 nucleic acid metabolic process							0.0	0.0	0.0	0.0	0.0	0.0	0.0	0.0	0.0	0.0	0.0	0.0	0.0	0.0	0.0	0.0	0.0	0.0	0.0	0.0
SCARNA2	677766	symbol	H. sapiens	677766	H. sapiens	SCARNA2	small Cajal body-specific RNA 2	GO:0006396 RNA processing;GO:0016070 RNA metabolic process;GO:0090304 nucleic acid metabolic process							0.0	0.0	0.0	0.0	0.0	0.0	0.0	0.0	0.0	0.0	0.0	0.0	0.0	0.0	0.0	0.0	0.0	0.0	0.0	0.0
SCARNA6	677772	symbol	H. sapiens	677772	H. sapiens	SCARNA6	small Cajal body-specific RNA 6	GO:0006396 RNA processing;GO:0016070 RNA metabolic process;GO:0090304 nucleic acid metabolic process							0.0	0.0	0.0	0.0	0.0	0.0	0.0	0.0	0.0	0.0	0.0	0.0	0.0	0.0	0.0	0.0	0.0	0.0	0.0	0.0
SCARNA7	677767	symbol	H. sapiens	677767	H. sapiens	SCARNA7	small Cajal body-specific RNA 7	GO:0006396 RNA processing;GO:0016070 RNA metabolic process;GO:0090304 nucleic acid metabolic process							0.0	0.0	0.0	0.0	0.0	0.0	0.0	0.0	0.0	0.0	0.0	0.0	0.0	0.0	0.0	0.0	0.0	0.0	0.0	0.0
SCUBE3	222663	symbol	H. sapiens	222663	H. sapiens	SCUBE3	signal peptide, CUB domain and EGF like domain containing 3	GO:0007165 signal transduction;GO:0023052 signaling;GO:0007154 cell communication		Predicted secreted proteins	Plasma membrane (Approved)		(M5883)NABA SECRETED FACTORS; (M5885)NABA MATRISOME ASSOCIATED; (M5889)NABA MATRISOME		0.0	0.0	0.0	0.0	0.0	0.0	0.0	0.0	0.0	0.0	0.0	0.0	0.0	0.0	0.0	0.0	0.0	0.0	0.0	0.0
SDC2	6383	symbol	H. sapiens	6383	H. sapiens	SDC2	syndecan 2	GO:0048814 regulation of dendrite morphogenesis;GO:0050773 regulation of dendrite development;GO:0048813 dendrite morphogenesis		CD markers	Cytosol;Plasma membrane (Approved)	Sargramostim	(M240)PID SYNDECAN 2 PATHWAY; (M276)PID FGF PATHWAY; (M100)PID SHP2 PATHWAY	(M5942)HALLMARK UV RESPONSE DN; (M5891)HALLMARK HYPOXIA; (M5937)HALLMARK GLYCOLYSIS	0.0	0.0	1.0	0.0	0.0	0.0	0.0	0.0	0.0	0.0	0.0	1.0	0.0	0.0	0.0	0.0	0.0	0.0	0.0	0.0
SDR42E1	93517	symbol	H. sapiens	93517	H. sapiens	SDR42E1	short chain dehydrogenase/reductase family 42E, member 1	GO:0006694 steroid biosynthetic process;GO:0008202 steroid metabolic process;GO:0008610 lipid biosynthetic process		Predicted intracellular proteins					0.0	0.0	0.0	0.0	0.0	0.0	0.0	0.0	0.0	0.0	0.0	0.0	0.0	0.0	0.0	0.0	0.0	0.0	0.0	0.0
SH2B3	10019	symbol	H. sapiens	10019	H. sapiens	SH2B3	SH2B adaptor protein 3	GO:1900234 regulation of Kit signaling pathway;GO:1900235 negative regulation of Kit signaling pathway;GO:0035702 monocyte homeostasis		Predicted intracellular proteins; Disease related genes; Cancer-related genes	Nucleoplasm (Approved)	Pazopanib	(M233)PID EPO PATHWAY; (M231)PID KIT PATHWAY	(M5921)HALLMARK COMPLEMENT	1.0	0.0	1.0	0.0	1.0	1.0	0.0	0.0	1.0	0.0	0.0	0.0	0.0	0.0	1.0	0.0	1.0	0.0	0.0	1.0
SLC5A3	6526	symbol	H. sapiens	6526	H. sapiens	SLC5A3	solute carrier family 5 member 3	GO:1904679 myo-inositol import across plasma membrane;GO:0015750 pentose transmembrane transport;GO:0015756 fucose transmembrane transport		Transporters:Electrochemical Potential-driven transporters	Plasma membrane (Supported)				0.0	0.0	0.0	0.0	0.0	0.0	0.0	0.0	0.0	0.0	0.0	0.0	0.0	0.0	0.0	0.0	0.0	0.0	0.0	0.0
SLC7A5P2	387254	symbol	H. sapiens	387254	H. sapiens	SLC7A5P2	solute carrier family 7 member 5 pseudogene 2	GO:1902475 L-alpha-amino acid transmembrane transport;GO:0015807 L-amino acid transport;GO:0003333 amino acid transmembrane transport							0.0	0.0	0.0	0.0	0.0	0.0	0.0	0.0	0.0	0.0	0.0	0.0	0.0	0.0	0.0	0.0	0.0	0.0	0.0	0.0
SMIM10L2B	644596	symbol	H. sapiens	644596	H. sapiens	SMIM10L2B	small integral membrane protein 10 like 2B								0.0	0.0	0.0	0.0	0.0	0.0	0.0	0.0	0.0	0.0	0.0	0.0	0.0	0.0	0.0	0.0	0.0	0.0	0.0	0.0
SNORA10	574042	symbol	H. sapiens	574042	H. sapiens	SNORA10	small nucleolar RNA, H/ACA box 10	GO:0006396 RNA processing;GO:0016070 RNA metabolic process;GO:0090304 nucleic acid metabolic process							0.0	0.0	0.0	0.0	0.0	0.0	0.0	0.0	0.0	0.0	0.0	0.0	0.0	0.0	0.0	0.0	0.0	0.0	0.0	0.0
SNORA16A	692073	symbol	H. sapiens	692073	H. sapiens	SNORA16A	small nucleolar RNA, H/ACA box 16A	GO:0006396 RNA processing;GO:0016070 RNA metabolic process;GO:0090304 nucleic acid metabolic process							0.0	0.0	0.0	0.0	0.0	0.0	0.0	0.0	0.0	0.0	0.0	0.0	0.0	0.0	0.0	0.0	0.0	0.0	0.0	0.0
SNORA22	677807	symbol	H. sapiens	677807	H. sapiens	SNORA22	small nucleolar RNA, H/ACA box 22	GO:0006396 RNA processing;GO:0016070 RNA metabolic process;GO:0090304 nucleic acid metabolic process							0.0	0.0	0.0	0.0	0.0	0.0	0.0	0.0	0.0	0.0	0.0	0.0	0.0	0.0	0.0	0.0	0.0	0.0	0.0	0.0
SNORA23	677808	symbol	H. sapiens	677808	H. sapiens	SNORA23	small nucleolar RNA, H/ACA box 23	GO:0006396 RNA processing;GO:0016070 RNA metabolic process;GO:0090304 nucleic acid metabolic process							0.0	0.0	0.0	0.0	0.0	0.0	0.0	0.0	0.0	0.0	0.0	0.0	0.0	0.0	0.0	0.0	0.0	0.0	0.0	0.0
SNORA24	677809	symbol	H. sapiens	677809	H. sapiens	SNORA24	small nucleolar RNA, H/ACA box 24	GO:0006396 RNA processing;GO:0016070 RNA metabolic process;GO:0090304 nucleic acid metabolic process							0.0	0.0	0.0	0.0	0.0	0.0	0.0	0.0	0.0	0.0	0.0	0.0	0.0	0.0	0.0	0.0	0.0	0.0	0.0	0.0
SNORA38	677820	symbol	H. sapiens	677820	H. sapiens	SNORA38	small nucleolar RNA, H/ACA box 38	GO:0006396 RNA processing;GO:0016070 RNA metabolic process;GO:0090304 nucleic acid metabolic process							0.0	0.0	0.0	0.0	0.0	0.0	0.0	0.0	0.0	0.0	0.0	0.0	0.0	0.0	0.0	0.0	0.0	0.0	0.0	0.0
SNORA48	652965	symbol	H. sapiens	652965	H. sapiens	SNORA48	small nucleolar RNA, H/ACA box 48	GO:0006396 RNA processing;GO:0016070 RNA metabolic process;GO:0090304 nucleic acid metabolic process							0.0	0.0	0.0	0.0	0.0	0.0	0.0	0.0	0.0	0.0	0.0	0.0	0.0	0.0	0.0	0.0	0.0	0.0	0.0	0.0
SNORA52	619565	symbol	H. sapiens	619565	H. sapiens	SNORA52	small nucleolar RNA, H/ACA box 52	GO:0006396 RNA processing;GO:0016070 RNA metabolic process;GO:0090304 nucleic acid metabolic process							0.0	0.0	0.0	0.0	0.0	0.0	0.0	0.0	0.0	0.0	0.0	0.0	0.0	0.0	0.0	0.0	0.0	0.0	0.0	0.0
SNORA54	677833	symbol	H. sapiens	677833	H. sapiens	SNORA54	small nucleolar RNA, H/ACA box 54	GO:0006396 RNA processing;GO:0016070 RNA metabolic process;GO:0090304 nucleic acid metabolic process							0.0	0.0	0.0	0.0	0.0	0.0	0.0	0.0	0.0	0.0	0.0	0.0	0.0	0.0	0.0	0.0	0.0	0.0	0.0	0.0
SNORA57	692158	symbol	H. sapiens	692158	H. sapiens	SNORA57	small nucleolar RNA, H/ACA box 57	GO:0006396 RNA processing;GO:0016070 RNA metabolic process;GO:0090304 nucleic acid metabolic process							0.0	0.0	0.0	0.0	0.0	0.0	0.0	0.0	0.0	0.0	0.0	0.0	0.0	0.0	0.0	0.0	0.0	0.0	0.0	0.0
SNORA63	6043	symbol	H. sapiens	6043	H. sapiens	SNORA63	small nucleolar RNA, H/ACA box 63	GO:0006396 RNA processing;GO:0016070 RNA metabolic process;GO:0090304 nucleic acid metabolic process							0.0	0.0	0.0	0.0	0.0	0.0	0.0	0.0	0.0	0.0	0.0	0.0	0.0	0.0	0.0	0.0	0.0	0.0	0.0	0.0
SNORA70	26778	symbol	H. sapiens	26778	H. sapiens	SNORA70	small nucleolar RNA, H/ACA box 70	GO:0006396 RNA processing;GO:0016070 RNA metabolic process;GO:0090304 nucleic acid metabolic process							0.0	0.0	0.0	0.0	0.0	0.0	0.0	0.0	0.0	0.0	0.0	0.0	0.0	0.0	0.0	0.0	0.0	0.0	0.0	0.0
SNORA71A	26777	symbol	H. sapiens	26777	H. sapiens	SNORA71A	small nucleolar RNA, H/ACA box 71A	GO:0006396 RNA processing;GO:0016070 RNA metabolic process;GO:0090304 nucleic acid metabolic process							0.0	0.0	0.0	0.0	0.0	0.0	0.0	0.0	0.0	0.0	0.0	0.0	0.0	0.0	0.0	0.0	0.0	0.0	0.0	0.0
SNORA71D	677840	symbol	H. sapiens	677840	H. sapiens	SNORA71D	small nucleolar RNA, H/ACA box 71D	GO:0006396 RNA processing;GO:0016070 RNA metabolic process;GO:0090304 nucleic acid metabolic process							0.0	0.0	0.0	0.0	0.0	0.0	0.0	0.0	0.0	0.0	0.0	0.0	0.0	0.0	0.0	0.0	0.0	0.0	0.0	0.0
SNORA73B	26768	symbol	H. sapiens	26768	H. sapiens	SNORA73B	small nucleolar RNA, H/ACA box 73B	GO:0006396 RNA processing;GO:0016070 RNA metabolic process;GO:0090304 nucleic acid metabolic process							0.0	0.0	0.0	0.0	0.0	0.0	0.0	0.0	0.0	0.0	0.0	0.0	0.0	0.0	0.0	0.0	0.0	0.0	0.0	0.0
SNORA7B	677797	symbol	H. sapiens	677797	H. sapiens	SNORA7B	small nucleolar RNA, H/ACA box 7B	GO:0006396 RNA processing;GO:0016070 RNA metabolic process;GO:0090304 nucleic acid metabolic process							0.0	0.0	0.0	0.0	0.0	0.0	0.0	0.0	0.0	0.0	0.0	0.0	0.0	0.0	0.0	0.0	0.0	0.0	0.0	0.0
SNORA8	654320	symbol	H. sapiens	654320	H. sapiens	SNORA8	small nucleolar RNA, H/ACA box 8	GO:0006396 RNA processing;GO:0016070 RNA metabolic process;GO:0090304 nucleic acid metabolic process							0.0	0.0	0.0	0.0	0.0	0.0	0.0	0.0	0.0	0.0	0.0	0.0	0.0	0.0	0.0	0.0	0.0	0.0	0.0	0.0
SNORD10	652966	symbol	H. sapiens	652966	H. sapiens	SNORD10	small nucleolar RNA, C/D box 10	GO:0006396 RNA processing;GO:0016070 RNA metabolic process;GO:0090304 nucleic acid metabolic process							0.0	0.0	0.0	0.0	0.0	0.0	0.0	0.0	0.0	0.0	0.0	0.0	0.0	0.0	0.0	0.0	0.0	0.0	0.0	0.0
SNORD17	692086	symbol	H. sapiens	692086	H. sapiens	SNORD17	small nucleolar RNA, C/D box 17	GO:0006396 RNA processing;GO:0016070 RNA metabolic process;GO:0090304 nucleic acid metabolic process							0.0	0.0	0.0	0.0	0.0	0.0	0.0	0.0	0.0	0.0	0.0	0.0	0.0	0.0	0.0	0.0	0.0	0.0	0.0	0.0
SNORD97	692223	symbol	H. sapiens	692223	H. sapiens	SNORD97	small nucleolar RNA, C/D box 97	GO:0006396 RNA processing;GO:0016070 RNA metabolic process;GO:0090304 nucleic acid metabolic process							0.0	0.0	0.0	0.0	0.0	0.0	0.0	0.0	0.0	0.0	0.0	0.0	0.0	0.0	0.0	0.0	0.0	0.0	0.0	0.0
SNTB1	6641	symbol	H. sapiens	6641	H. sapiens	SNTB1	syntrophin beta 1	GO:0006936 muscle contraction;GO:0003012 muscle system process;GO:0003008 system process		Predicted intracellular proteins				(M5930)HALLMARK EPITHELIAL MESENCHYMAL TRANSITION	0.0	0.0	0.0	0.0	0.0	0.0	0.0	0.0	0.0	0.0	0.0	0.0	0.0	0.0	0.0	0.0	0.0	0.0	0.0	0.0
SOBP	55084	symbol	H. sapiens	55084	H. sapiens	SOBP	sine oculis binding protein homolog	GO:0090102 cochlea development;GO:0042472 inner ear morphogenesis;GO:0042471 ear morphogenesis		Predicted intracellular proteins; Disease related genes	Nucleoplasm (Approved); Additional: Vesicles				0.0	0.0	0.0	0.0	1.0	0.0	0.0	1.0	0.0	0.0	0.0	0.0	0.0	0.0	0.0	0.0	0.0	0.0	1.0	0.0
SOX2	6657	symbol	H. sapiens	6657	H. sapiens	SOX2	SRY-box transcription factor 2	GO:0001714 endodermal cell fate specification;GO:0021781 glial cell fate commitment;GO:0021984 adenohypophysis development		Predicted intracellular proteins; Disease related genes; Transcription factors:Other all-alpha-helical DNA-binding domains; Cancer-related genes	Nucleoplasm (Enhanced)				1.0	0.0	1.0	0.0	1.0	1.0	0.0	1.0	1.0	0.0	0.0	1.0	1.0	1.0	0.0	1.0	0.0	0.0	1.0	1.0
SPINT2	10653	symbol	H. sapiens	10653	H. sapiens	SPINT2	serine peptidase inhibitor, Kunitz type 2	GO:0060671 epithelial cell differentiation involved in embryonic placenta development;GO:0060672 epithelial cell morphogenesis involved in placental branching;GO:0060670 branching involved in labyrinthine layer morphogenesis		Cancer-related genes:Candidate cancer biomarkers; Predicted intracellular proteins; Disease related genes	Cytosol;Intermediate filaments;Plasma membrane (Uncertain)			(M5934)HALLMARK XENOBIOTIC METABOLISM	0.0	0.0	0.0	0.0	1.0	1.0	0.0	0.0	1.0	0.0	1.0	1.0	0.0	0.0	0.0	1.0	0.0	0.0	0.0	0.0
SPRED1	161742	symbol	H. sapiens	161742	H. sapiens	SPRED1	sprouty related EVH1 domain containing 1	GO:0060979 vasculogenesis involved in coronary vascular morphogenesis;GO:1902747 negative regulation of lens fiber cell differentiation;GO:1902746 regulation of lens fiber cell differentiation		Predicted intracellular proteins; Disease related genes	Nucleoplasm (Supported)		(M231)PID KIT PATHWAY		1.0	0.0	0.0	0.0	0.0	1.0	1.0	1.0	0.0	0.0	1.0	0.0	0.0	1.0	1.0	0.0	0.0	0.0	0.0	0.0
SRGN	5552	symbol	H. sapiens	5552	H. sapiens	SRGN	serglycin	GO:0033371 T cell secretory granule organization;GO:0033367 protein localization to mast cell secretory granule;GO:0033368 protease localization to mast cell secretory granule		Predicted intracellular proteins	Golgi apparatus (Supported)		(M5882)NABA PROTEOGLYCANS; (M5884)NABA CORE MATRISOME; (M5889)NABA MATRISOME	(M5950)HALLMARK ALLOGRAFT REJECTION	0.0	0.0	1.0	0.0	0.0	0.0	1.0	0.0	0.0	0.0	0.0	0.0	0.0	0.0	0.0	0.0	0.0	0.0	1.0	0.0
ST3GAL5	8869	symbol	H. sapiens	8869	H. sapiens	ST3GAL5	ST3 beta-galactoside alpha-2,3-sialyltransferase 5	GO:0001574 ganglioside biosynthetic process;GO:0097503 sialylation;GO:0001573 ganglioside metabolic process		ENZYME proteins:Transferases; Predicted intracellular proteins; Enzymes; Disease related genes; Potential drug targets	Vesicles (Approved)	99mTc-14 F7 Mab		(M5913)HALLMARK INTERFERON GAMMA RESPONSE	0.0	0.0	0.0	0.0	0.0	0.0	0.0	0.0	0.0	0.0	0.0	0.0	0.0	0.0	0.0	0.0	0.0	0.0	0.0	0.0
STARD13	90627	symbol	H. sapiens	90627	H. sapiens	STARD13	StAR related lipid transfer domain containing 13	GO:0097498 endothelial tube lumen extension;GO:0003159 morphogenesis of an endothelium;GO:0061154 endothelial tube morphogenesis		Predicted intracellular proteins					1.0	0.0	0.0	0.0	1.0	0.0	1.0	0.0	0.0	0.0	1.0	0.0	0.0	0.0	0.0	0.0	0.0	0.0	0.0	0.0
SUSD5	26032	symbol	H. sapiens	26032	H. sapiens	SUSD5	sushi domain containing 5	GO:0007219 Notch signaling pathway;GO:0007155 cell adhesion;GO:0022610 biological adhesion		Predicted intracellular proteins	Golgi apparatus;Vesicles (Uncertain)				0.0	0.0	0.0	0.0	0.0	0.0	0.0	0.0	0.0	0.0	0.0	0.0	1.0	0.0	0.0	0.0	0.0	0.0	0.0	0.0
TBX2	6909	symbol	H. sapiens	6909	H. sapiens	TBX2	T-box transcription factor 2	GO:1901208 negative regulation of heart looping;GO:1901210 regulation of cardiac chamber formation;GO:1901211 negative regulation of cardiac chamber formation		Predicted intracellular proteins; Transcription factors:Immunoglobulin fold	Nucleoplasm (Approved); Additional: Cytosol				0.0	0.0	0.0	0.0	1.0	0.0	0.0	1.0	0.0	0.0	1.0	0.0	1.0	1.0	0.0	0.0	0.0	0.0	0.0	0.0
TERC	7012	symbol	H. sapiens	7012	H. sapiens	TERC	telomerase RNA component	GO:2000773 negative regulation of cellular senescence;GO:0090344 negative regulation of cell aging;GO:2000772 regulation of cellular senescence							1.0	0.0	0.0	0.0	0.0	0.0	0.0	0.0	0.0	0.0	0.0	0.0	0.0	0.0	0.0	0.0	0.0	0.0	0.0	0.0
TET1	80312	symbol	H. sapiens	80312	H. sapiens	TET1	tet methylcytosine dioxygenase 1	GO:0090310 negative regulation of DNA methylation-dependent heterochromatin assembly;GO:0006211 5-methylcytosine catabolic process;GO:0019857 5-methylcytosine metabolic process		Transcription factors:Zinc-coordinating DNA-binding domains; Predicted intracellular proteins; Enzymes; Disease related genes; ENZYME proteins:Oxidoreductases; Cancer-related genes; Potential drug targets	Nucleoplasm (Supported); Additional: Nuclear membrane				1.0	1.0	0.0	1.0	1.0	0.0	0.0	0.0	0.0	0.0	0.0	0.0	0.0	0.0	0.0	0.0	0.0	0.0	0.0	0.0
TET2	54790	symbol	H. sapiens	54790	H. sapiens	TET2	tet methylcytosine dioxygenase 2	GO:0006211 5-methylcytosine catabolic process;GO:0019857 5-methylcytosine metabolic process;GO:0080182 histone H3-K4 trimethylation		Cancer-related genes:Mutated cancer genes; Predicted intracellular proteins; Enzymes; ENZYME proteins:Oxidoreductases; Disease related genes; Cancer-related genes:Mutational cancer driver genes; Potential drug targets	Nucleoplasm (Approved)				1.0	0.0	0.0	0.0	0.0	0.0	0.0	0.0	0.0	0.0	0.0	0.0	0.0	0.0	0.0	0.0	0.0	0.0	0.0	0.0
TGFB2	7042	symbol	H. sapiens	7042	H. sapiens	TGFB2	transforming growth factor beta 2	GO:1903701 substantia propria of cornea development;GO:0042704 uterine wall breakdown;GO:0051795 positive regulation of timing of catagen		Cancer-related genes:Candidate cancer biomarkers; Predicted secreted proteins; Disease related genes			(M11736)SA MMP CYTOKINE CONNECTION; (M211)PID HEDGEHOG 2PATHWAY; (M33)PID GLYPICAN 1PATHWAY	(M5902)HALLMARK APOPTOSIS; (M5934)HALLMARK XENOBIOTIC METABOLISM; (M5950)HALLMARK ALLOGRAFT REJECTION	1.0	0.0	1.0	0.0	1.0	1.0	1.0	1.0	1.0	0.0	1.0	1.0	1.0	1.0	0.0	1.0	0.0	1.0	1.0	1.0
TMC6	11322	symbol	H. sapiens	11322	H. sapiens	TMC6	transmembrane channel like 6	GO:0034220 ion transmembrane transport;GO:0055085 transmembrane transport;GO:0006811 ion transport		Transporters:Transporter channels and pores; Predicted intracellular proteins; Potential drug targets; Disease related genes					0.0	0.0	0.0	0.0	0.0	0.0	0.0	0.0	0.0	0.0	0.0	0.0	0.0	0.0	0.0	0.0	0.0	0.0	0.0	0.0
TMEM2	23670	gene_synonym	H. sapiens	23670	H. sapiens	CEMIP2	cell migration inducing hyaluronidase 2	GO:0030214 hyaluronan catabolic process;GO:0006027 glycosaminoglycan catabolic process;GO:0030212 hyaluronan metabolic process		Predicted intracellular proteins; ENZYME proteins:Hydrolases; Enzymes	Plasma membrane (Supported); Additional: Vesicles				0.0	0.0	0.0	0.0	0.0	0.0	0.0	0.0	0.0	0.0	1.0	0.0	0.0	0.0	0.0	0.0	0.0	0.0	0.0	0.0
TNNC1	7134	symbol	H. sapiens	7134	H. sapiens	TNNC1	troponin C1, slow skeletal and cardiac type	GO:0002086 diaphragm contraction;GO:0032972 regulation of muscle filament sliding speed;GO:0003011 involuntary skeletal muscle contraction		Predicted intracellular proteins; FDA approved drug targets:Small molecule drugs; Disease related genes	Actin filaments;Mitochondria;Nucleoplasm (Approved)	Trifluoperazine; Levosimendan; Felodipine; Bepridil; Calcium; Aluminium monostearate; 5-[1-(3,4-Dimethoxy-Benzoyl)-1,2,3,4-Tetrahydro-Quinolin-6-Yl]-6-Methyl-3,6-Dihydro-[1,3,4]Thiadiazin-2-One; N-(6-Aminohexyl)-5-Chloro-1-Naphthalenesulfonamide		(M5907)HALLMARK ESTROGEN RESPONSE LATE; (M5909)HALLMARK MYOGENESIS	0.0	0.0	0.0	0.0	1.0	0.0	0.0	0.0	0.0	0.0	0.0	0.0	1.0	0.0	0.0	0.0	0.0	1.0	0.0	0.0
TOM1L2	146691	symbol	H. sapiens	146691	H. sapiens	TOM1L2	target of myb1 like 2 membrane trafficking protein	GO:0045839 negative regulation of mitotic nuclear division;GO:0051784 negative regulation of nuclear division;GO:0007088 regulation of mitotic nuclear division		Predicted intracellular proteins	Intermediate filaments (Approved); Additional: Golgi apparatus				0.0	0.0	0.0	0.0	0.0	0.0	0.0	0.0	0.0	0.0	0.0	0.0	0.0	0.0	0.0	0.0	0.0	0.0	0.0	0.0
TRAF4	9618	symbol	H. sapiens	9618	H. sapiens	TRAF4	TNF receptor associated factor 4	GO:0007250 activation of NF-kappaB-inducing kinase activity;GO:0007585 respiratory gaseous exchange by respiratory system;GO:0046330 positive regulation of JNK cascade		Cancer-related genes:Candidate cancer biomarkers; Predicted intracellular proteins	Nucleoli fibrillar center (Supported); Additional: Cytosol;Nucleoplasm		(M256)PID TAP63 PATHWAY	(M5939)HALLMARK P53 PATHWAY	0.0	0.0	0.0	0.0	0.0	0.0	0.0	0.0	0.0	0.0	0.0	0.0	0.0	0.0	0.0	0.0	0.0	0.0	0.0	0.0
TRAPPC2	6399	symbol	H. sapiens	6399	H. sapiens	TRAPPC2	trafficking protein particle complex subunit 2	GO:0006888 endoplasmic reticulum to Golgi vesicle-mediated transport;GO:0048193 Golgi vesicle transport;GO:0001501 skeletal system development		Predicted intracellular proteins; Disease related genes	Endoplasmic reticulum;Vesicles (Approved); Additional: Nucleoplasm				0.0	0.0	0.0	0.0	0.0	1.0	0.0	0.0	0.0	0.0	0.0	0.0	0.0	0.0	0.0	0.0	0.0	0.0	0.0	0.0
TRIM67	440730	symbol	H. sapiens	440730	H. sapiens	TRIM67	tripartite motif containing 67	GO:0046580 negative regulation of Ras protein signal transduction;GO:0051058 negative regulation of small GTPase mediated signal transduction;GO:2000060 positive regulation of ubiquitin-dependent protein catabolic process		Predicted intracellular proteins					0.0	0.0	0.0	0.0	0.0	0.0	1.0	0.0	0.0	0.0	0.0	1.0	0.0	0.0	0.0	0.0	0.0	0.0	0.0	0.0
TRPV2	51393	symbol	H. sapiens	51393	H. sapiens	TRPV2	transient receptor potential cation channel subfamily V member 2	GO:0090280 positive regulation of calcium ion import;GO:0098703 calcium ion import across plasma membrane;GO:1902656 calcium ion import into cytosol		Transporters:Transporter channels and pores; Predicted intracellular proteins	Plasma membrane (Supported)	Cannabidiol; Tetrahydrocannabivarin; Medical Cannabis; Nabiximols; Cannabidivarin			0.0	0.0	0.0	0.0	0.0	0.0	0.0	0.0	0.0	0.0	0.0	1.0	0.0	0.0	0.0	0.0	0.0	0.0	0.0	0.0
TTC9	23508	symbol	H. sapiens	23508	H. sapiens	TTC9	tetratricopeptide repeat domain 9			Predicted intracellular proteins					0.0	0.0	0.0	0.0	0.0	0.0	0.0	0.0	0.0	0.0	0.0	0.0	0.0	0.0	0.0	0.0	0.0	0.0	0.0	0.0
UBL4B	164153	symbol	H. sapiens	164153	H. sapiens	UBL4B	ubiquitin like 4B	GO:1903955 positive regulation of protein targeting to mitochondrion;GO:1903749 positive regulation of establishment of protein localization to mitochondrion;GO:1903214 regulation of protein targeting to mitochondrion		Predicted intracellular proteins					0.0	0.0	0.0	0.0	0.0	0.0	0.0	0.0	0.0	0.0	0.0	0.0	0.0	0.0	0.0	0.0	0.0	0.0	0.0	0.0
UGCG	7357	symbol	H. sapiens	7357	H. sapiens	UGCG	UDP-glucose ceramide glucosyltransferase	GO:0006679 glucosylceramide biosynthetic process;GO:1903575 cornified envelope assembly;GO:0006678 glucosylceramide metabolic process		ENZYME proteins:Transferases; FDA approved drug targets:Small molecule drugs; Transporters; Enzymes		Miglustat; Eliglustat	(M143)PID IL2 PI3K PATHWAY	(M5906)HALLMARK ESTROGEN RESPONSE EARLY	0.0	0.0	0.0	0.0	0.0	0.0	0.0	0.0	0.0	0.0	0.0	0.0	0.0	0.0	0.0	1.0	0.0	0.0	0.0	0.0
VSTM2A	222008	symbol	H. sapiens	222008	H. sapiens	VSTM2A	V-set and transmembrane domain containing 2A	GO:0070352 positive regulation of white fat cell proliferation;GO:0070343 white fat cell proliferation;GO:0070350 regulation of white fat cell proliferation		Predicted secreted proteins					0.0	0.0	0.0	0.0	0.0	1.0	0.0	0.0	0.0	0.0	0.0	0.0	0.0	0.0	0.0	0.0	0.0	0.0	0.0	0.0
WDFY3	23001	symbol	H. sapiens	23001	H. sapiens	WDFY3	WD repeat and FYVE domain containing 3	GO:0035973 aggrephagy;GO:0061912 selective autophagy;GO:0016236 macroautophagy		Predicted intracellular proteins; Disease related genes	Cytosol (Approved); Additional: Nucleoli;Plasma membrane				0.0	0.0	0.0	0.0	0.0	0.0	0.0	0.0	0.0	0.0	0.0	0.0	0.0	0.0	0.0	0.0	0.0	0.0	0.0	0.0
WNT5A	7474	symbol	H. sapiens	7474	H. sapiens	WNT5A	Wnt family member 5A	GO:0036517 chemoattraction of serotonergic neuron axon;GO:0048850 hypophysis morphogenesis;GO:0061341 non-canonical Wnt signaling pathway involved in heart development		Predicted secreted proteins; Disease related genes			(M77)PID WNT SIGNALING PATHWAY; (M23)PID WNT NONCANONICAL PATHWAY; (M254)PID MYC REPRESS PATHWAY	(M5903)HALLMARK NOTCH SIGNALING; (M5930)HALLMARK EPITHELIAL MESENCHYMAL TRANSITION	1.0	0.0	0.0	0.0	1.0	1.0	0.0	1.0	1.0	0.0	1.0	1.0	1.0	1.0	1.0	1.0	0.0	0.0	1.0	1.0
ZFHX3	463	symbol	H. sapiens	463	H. sapiens	ZFHX3	zinc finger homeobox 3	GO:1904059 regulation of locomotor rhythm;GO:0045475 locomotor rhythm;GO:0048512 circadian behavior		Cancer-related genes:Mutated cancer genes; Cancer-related genes:Mutational cancer driver genes; Predicted intracellular proteins; Transcription factors:Helix-turn-helix domains	Nucleoplasm (Supported)		(M195)PID CMYB PATHWAY		0.0	0.0	0.0	0.0	0.0	1.0	0.0	0.0	1.0	0.0	0.0	1.0	0.0	1.0	0.0	0.0	0.0	0.0	0.0	0.0
ZNF460	10794	symbol	H. sapiens	10794	H. sapiens	ZNF460	zinc finger protein 460	GO:0006357 regulation of transcription by RNA polymerase II;GO:0006366 transcription by RNA polymerase II;GO:0006355 regulation of transcription, DNA-templated		Transcription factors:Zinc-coordinating DNA-binding domains; Predicted intracellular proteins	Nucleoplasm (Approved)				0.0	0.0	0.0	0.0	0.0	0.0	0.0	0.0	0.0	0.0	0.0	0.0	0.0	0.0	0.0	0.0	0.0	0.0	0.0	0.0

## Sheet: Enrichment
GroupID	Category	Term	Description	LogP	Log(q-value)	InTerm_InList	Genes	Symbols
1_Summary	Reactome Gene Sets	R-HSA-3214815	HDACs deacetylate histones	-63.0515	-58.6898	43/94	3012,3013,3017,8294,8329,8330,8331,8332,8334,8335,8336,8338,8340,8341,8342,8345,8348,8349,8350,8351,8352,8353,8355,8356,8357,8358,8360,8361,8362,8363,8364,8365,8366,8367,8368,8968,8969,8970,85235,121504,317772,440689,653604,388,94274,4915,1021,1912,2353,3006,3007,3008,3009,3024,4217,8091,3955,8242,11240,54790,80312,6657,7474,8549,182,23129,255324,5158,23236,26999,1969,10395,64283,90627,121512,899…	H2AC8,H2AC7,H2BC5,H4C9,H2AC13,H2AC15,H2AC14,H2AC16,H2AC6,H2AC4,H2AC17,H2AC20,H2BC13,H2BC15,H2BC14,H2BC9,H2BC17,H2BC21,H3C1,H3C4,H3C3,H3C6,H3C8,H3C12,H3C10,H3C2,H4C4,H4C6,H4C12,H4C11,H4C3,H4C8,H4C2,H4C5,H4C13,H3C7,H2AC11,H2BC11,H2AC12,H4-16,H2AC21,H2BC18,H3C13,RHOB,PPP1R14A,NTRK2,CDK6,PHC2,FOS,H1-2,H1-3,H1-4,H1-5,H1-1,MAP3K5,HMGA2,LFNG,KDM5C,PADI2,TET2,TET1,SOX2,WNT5A,LGR5,JAG1,PLXND1,EPGN,PDE6B,P…
1_Member	Reactome Gene Sets	R-HSA-3214815	HDACs deacetylate histones	-63.0515	-58.6898	43/94	3012,3013,3017,8294,8329,8330,8331,8332,8334,8335,8336,8338,8340,8341,8342,8345,8348,8349,8350,8351,8352,8353,8355,8356,8357,8358,8360,8361,8362,8363,8364,8365,8366,8367,8368,8968,8969,8970,85235,121504,317772,440689,653604	H2AC8,H2AC7,H2BC5,H4C9,H2AC13,H2AC15,H2AC14,H2AC16,H2AC6,H2AC4,H2AC17,H2AC20,H2BC13,H2BC15,H2BC14,H2BC9,H2BC17,H2BC21,H3C1,H3C4,H3C3,H3C6,H3C8,H3C12,H3C10,H3C2,H4C4,H4C6,H4C12,H4C11,H4C3,H4C8,H4C2,H4C5,H4C13,H3C7,H2AC11,H2BC11,H2AC12,H4-16,H2AC21,H2BC18,H3C13
1_Member	Reactome Gene Sets	R-HSA-9610379	HCMV Late Events	-58.0857	-54.0251	43/116	3012,3013,3017,8294,8329,8330,8331,8332,8334,8335,8336,8338,8340,8341,8342,8345,8348,8349,8350,8351,8352,8353,8355,8356,8357,8358,8360,8361,8362,8363,8364,8365,8366,8367,8368,8968,8969,8970,85235,121504,317772,440689,653604	H2AC8,H2AC7,H2BC5,H4C9,H2AC13,H2AC15,H2AC14,H2AC16,H2AC6,H2AC4,H2AC17,H2AC20,H2BC13,H2BC15,H2BC14,H2BC9,H2BC17,H2BC21,H3C1,H3C4,H3C3,H3C6,H3C8,H3C12,H3C10,H3C2,H4C4,H4C6,H4C12,H4C11,H4C3,H4C8,H4C2,H4C5,H4C13,H3C7,H2AC11,H2BC11,H2AC12,H4-16,H2AC21,H2BC18,H3C13
1_Member	Reactome Gene Sets	R-HSA-73728	RNA Polymerase I Promoter Opening	-55.2418	-51.3572	35/63	3012,3013,3017,8294,8331,8334,8335,8338,8340,8341,8342,8345,8348,8349,8350,8351,8352,8353,8355,8356,8357,8358,8360,8361,8362,8363,8364,8365,8366,8367,8368,8968,8970,121504,653604	H2AC8,H2AC7,H2BC5,H4C9,H2AC14,H2AC6,H2AC4,H2AC20,H2BC13,H2BC15,H2BC14,H2BC9,H2BC17,H2BC21,H3C1,H3C4,H3C3,H3C6,H3C8,H3C12,H3C10,H3C2,H4C4,H4C6,H4C12,H4C11,H4C3,H4C8,H4C2,H4C5,H4C13,H3C7,H2BC11,H4-16,H3C13
1_Member	KEGG Pathway	hsa05322	Systemic lupus erythematosus	-55.0188	-51.356	43/133	3012,3013,3017,8294,8329,8330,8331,8332,8334,8335,8336,8338,8340,8341,8342,8345,8348,8349,8350,8351,8352,8353,8355,8356,8357,8358,8360,8361,8362,8363,8364,8365,8366,8367,8368,8968,8969,8970,85235,121504,317772,440689,653604	H2AC8,H2AC7,H2BC5,H4C9,H2AC13,H2AC15,H2AC14,H2AC16,H2AC6,H2AC4,H2AC17,H2AC20,H2BC13,H2BC15,H2BC14,H2BC9,H2BC17,H2BC21,H3C1,H3C4,H3C3,H3C6,H3C8,H3C12,H3C10,H3C2,H4C4,H4C6,H4C12,H4C11,H4C3,H4C8,H4C2,H4C5,H4C13,H3C7,H2AC11,H2BC11,H2AC12,H4-16,H2AC21,H2BC18,H3C13
1_Member	KEGG Pathway	ko05322	Systemic lupus erythematosus	-55.0188	-51.356	43/133	3012,3013,3017,8294,8329,8330,8331,8332,8334,8335,8336,8338,8340,8341,8342,8345,8348,8349,8350,8351,8352,8353,8355,8356,8357,8358,8360,8361,8362,8363,8364,8365,8366,8367,8368,8968,8969,8970,85235,121504,317772,440689,653604	H2AC8,H2AC7,H2BC5,H4C9,H2AC13,H2AC15,H2AC14,H2AC16,H2AC6,H2AC4,H2AC17,H2AC20,H2BC13,H2BC15,H2BC14,H2BC9,H2BC17,H2BC21,H3C1,H3C4,H3C3,H3C6,H3C8,H3C12,H3C10,H3C2,H4C4,H4C6,H4C12,H4C11,H4C3,H4C8,H4C2,H4C5,H4C13,H3C7,H2AC11,H2BC11,H2AC12,H4-16,H2AC21,H2BC18,H3C13
1_Member	Reactome Gene Sets	R-HSA-9609690	HCMV Early Events	-54.6904	-51.1068	43/135	3012,3013,3017,8294,8329,8330,8331,8332,8334,8335,8336,8338,8340,8341,8342,8345,8348,8349,8350,8351,8352,8353,8355,8356,8357,8358,8360,8361,8362,8363,8364,8365,8366,8367,8368,8968,8969,8970,85235,121504,317772,440689,653604	H2AC8,H2AC7,H2BC5,H4C9,H2AC13,H2AC15,H2AC14,H2AC16,H2AC6,H2AC4,H2AC17,H2AC20,H2BC13,H2BC15,H2BC14,H2BC9,H2BC17,H2BC21,H3C1,H3C4,H3C3,H3C6,H3C8,H3C12,H3C10,H3C2,H4C4,H4C6,H4C12,H4C11,H4C3,H4C8,H4C2,H4C5,H4C13,H3C7,H2AC11,H2BC11,H2AC12,H4-16,H2AC21,H2BC18,H3C13
1_Member	Reactome Gene Sets	R-HSA-5334118	DNA methylation	-54.5687	-51.052	35/65	3012,3013,3017,8294,8331,8334,8335,8338,8340,8341,8342,8345,8348,8349,8350,8351,8352,8353,8355,8356,8357,8358,8360,8361,8362,8363,8364,8365,8366,8367,8368,8968,8970,121504,653604	H2AC8,H2AC7,H2BC5,H4C9,H2AC14,H2AC6,H2AC4,H2AC20,H2BC13,H2BC15,H2BC14,H2BC9,H2BC17,H2BC21,H3C1,H3C4,H3C3,H3C6,H3C8,H3C12,H3C10,H3C2,H4C4,H4C6,H4C12,H4C11,H4C3,H4C8,H4C2,H4C5,H4C13,H3C7,H2BC11,H4-16,H3C13
1_Member	Reactome Gene Sets	R-HSA-5625886	Activated PKN1 stimulates transcription of AR (androgen receptor) regulated genes KLK2 and KLK3	-53.926	-50.4674	35/67	3012,3013,3017,8294,8331,8334,8335,8338,8340,8341,8342,8345,8348,8349,8350,8351,8352,8353,8355,8356,8357,8358,8360,8361,8362,8363,8364,8365,8366,8367,8368,8968,8970,121504,653604	H2AC8,H2AC7,H2BC5,H4C9,H2AC14,H2AC6,H2AC4,H2AC20,H2BC13,H2BC15,H2BC14,H2BC9,H2BC17,H2BC21,H3C1,H3C4,H3C3,H3C6,H3C8,H3C12,H3C10,H3C2,H4C4,H4C6,H4C12,H4C11,H4C3,H4C8,H4C2,H4C5,H4C13,H3C7,H2BC11,H4-16,H3C13
1_Member	Reactome Gene Sets	R-HSA-427359	SIRT1 negatively regulates rRNA expression	-53.6152	-50.2251	35/68	3012,3013,3017,8294,8331,8334,8335,8338,8340,8341,8342,8345,8348,8349,8350,8351,8352,8353,8355,8356,8357,8358,8360,8361,8362,8363,8364,8365,8366,8367,8368,8968,8970,121504,653604	H2AC8,H2AC7,H2BC5,H4C9,H2AC14,H2AC6,H2AC4,H2AC20,H2BC13,H2BC15,H2BC14,H2BC9,H2BC17,H2BC21,H3C1,H3C4,H3C3,H3C6,H3C8,H3C12,H3C10,H3C2,H4C4,H4C6,H4C12,H4C11,H4C3,H4C8,H4C2,H4C5,H4C13,H3C7,H2BC11,H4-16,H3C13
1_Member	Reactome Gene Sets	R-HSA-3214847	HATs acetylate histones	-53.5868	-50.2251	43/142	3012,3013,3017,8294,8329,8330,8331,8332,8334,8335,8336,8338,8340,8341,8342,8345,8348,8349,8350,8351,8352,8353,8355,8356,8357,8358,8360,8361,8362,8363,8364,8365,8366,8367,8368,8968,8969,8970,85235,121504,317772,440689,653604	H2AC8,H2AC7,H2BC5,H4C9,H2AC13,H2AC15,H2AC14,H2AC16,H2AC6,H2AC4,H2AC17,H2AC20,H2BC13,H2BC15,H2BC14,H2BC9,H2BC17,H2BC21,H3C1,H3C4,H3C3,H3C6,H3C8,H3C12,H3C10,H3C2,H4C4,H4C6,H4C12,H4C11,H4C3,H4C8,H4C2,H4C5,H4C13,H3C7,H2AC11,H2BC11,H2AC12,H4-16,H2AC21,H2BC18,H3C13
1_Member	Reactome Gene Sets	R-HSA-212300	PRC2 methylates histones and DNA	-52.1553	-48.8728	35/73	3012,3013,3017,8294,8331,8334,8335,8338,8340,8341,8342,8345,8348,8349,8350,8351,8352,8353,8355,8356,8357,8358,8360,8361,8362,8363,8364,8365,8366,8367,8368,8968,8970,121504,653604	H2AC8,H2AC7,H2BC5,H4C9,H2AC14,H2AC6,H2AC4,H2AC20,H2BC13,H2BC15,H2BC14,H2BC9,H2BC17,H2BC21,H3C1,H3C4,H3C3,H3C6,H3C8,H3C12,H3C10,H3C2,H4C4,H4C6,H4C12,H4C11,H4C3,H4C8,H4C2,H4C5,H4C13,H3C7,H2BC11,H4-16,H3C13
1_Member	Reactome Gene Sets	R-HSA-9710421	Defective pyroptosis	-52.1553	-48.8728	35/73	3012,3013,3017,8294,8331,8334,8335,8338,8340,8341,8342,8345,8348,8349,8350,8351,8352,8353,8355,8356,8357,8358,8360,8361,8362,8363,8364,8365,8366,8367,8368,8968,8970,121504,653604	H2AC8,H2AC7,H2BC5,H4C9,H2AC14,H2AC6,H2AC4,H2AC20,H2BC13,H2BC15,H2BC14,H2BC9,H2BC17,H2BC21,H3C1,H3C4,H3C3,H3C6,H3C8,H3C12,H3C10,H3C2,H4C4,H4C6,H4C12,H4C11,H4C3,H4C8,H4C2,H4C5,H4C13,H3C7,H2BC11,H4-16,H3C13
1_Member	Reactome Gene Sets	R-HSA-2299718	Condensation of Prophase Chromosomes	-51.8804	-48.6326	35/74	3012,3013,3017,8294,8331,8334,8335,8338,8340,8341,8342,8345,8348,8349,8350,8351,8352,8353,8355,8356,8357,8358,8360,8361,8362,8363,8364,8365,8366,8367,8368,8968,8970,121504,653604	H2AC8,H2AC7,H2BC5,H4C9,H2AC14,H2AC6,H2AC4,H2AC20,H2BC13,H2BC15,H2BC14,H2BC9,H2BC17,H2BC21,H3C1,H3C4,H3C3,H3C6,H3C8,H3C12,H3C10,H3C2,H4C4,H4C6,H4C12,H4C11,H4C3,H4C8,H4C2,H4C5,H4C13,H3C7,H2BC11,H4-16,H3C13
1_Member	Reactome Gene Sets	R-HSA-427389	ERCC6 (CSB) and EHMT2 (G9a) positively regulate rRNA expression	-51.3458	-48.1303	35/76	3012,3013,3017,8294,8331,8334,8335,8338,8340,8341,8342,8345,8348,8349,8350,8351,8352,8353,8355,8356,8357,8358,8360,8361,8362,8363,8364,8365,8366,8367,8368,8968,8970,121504,653604	H2AC8,H2AC7,H2BC5,H4C9,H2AC14,H2AC6,H2AC4,H2AC20,H2BC13,H2BC15,H2BC14,H2BC9,H2BC17,H2BC21,H3C1,H3C4,H3C3,H3C6,H3C8,H3C12,H3C10,H3C2,H4C4,H4C6,H4C12,H4C11,H4C3,H4C8,H4C2,H4C5,H4C13,H3C7,H2BC11,H4-16,H3C13
1_Member	Reactome Gene Sets	R-HSA-9609646	HCMV Infection	-51.0291	-47.8435	43/160	3012,3013,3017,8294,8329,8330,8331,8332,8334,8335,8336,8338,8340,8341,8342,8345,8348,8349,8350,8351,8352,8353,8355,8356,8357,8358,8360,8361,8362,8363,8364,8365,8366,8367,8368,8968,8969,8970,85235,121504,317772,440689,653604	H2AC8,H2AC7,H2BC5,H4C9,H2AC13,H2AC15,H2AC14,H2AC16,H2AC6,H2AC4,H2AC17,H2AC20,H2BC13,H2BC15,H2BC14,H2BC9,H2BC17,H2BC21,H3C1,H3C4,H3C3,H3C6,H3C8,H3C12,H3C10,H3C2,H4C4,H4C6,H4C12,H4C11,H4C3,H4C8,H4C2,H4C5,H4C13,H3C7,H2AC11,H2BC11,H2AC12,H4-16,H2AC21,H2BC18,H3C13
1_Member	Reactome Gene Sets	R-HSA-5625740	RHO GTPases activate PKNs	-50.8712	-47.7136	37/95	388,3012,3013,3017,8294,8331,8334,8335,8338,8340,8341,8342,8345,8348,8349,8350,8351,8352,8353,8355,8356,8357,8358,8360,8361,8362,8363,8364,8365,8366,8367,8368,8968,8970,94274,121504,653604	RHOB,H2AC8,H2AC7,H2BC5,H4C9,H2AC14,H2AC6,H2AC4,H2AC20,H2BC13,H2BC15,H2BC14,H2BC9,H2BC17,H2BC21,H3C1,H3C4,H3C3,H3C6,H3C8,H3C12,H3C10,H3C2,H4C4,H4C6,H4C12,H4C11,H4C3,H4C8,H4C2,H4C5,H4C13,H3C7,H2BC11,PPP1R14A,H4-16,H3C13
1_Member	KEGG Pathway	ko05034	Alcoholism	-50.2004	-47.0691	44/180	3012,3013,3017,4915,8294,8329,8330,8331,8332,8334,8335,8336,8338,8340,8341,8342,8345,8348,8349,8350,8351,8352,8353,8355,8356,8357,8358,8360,8361,8362,8363,8364,8365,8366,8367,8368,8968,8969,8970,85235,121504,317772,440689,653604	H2AC8,H2AC7,H2BC5,NTRK2,H4C9,H2AC13,H2AC15,H2AC14,H2AC16,H2AC6,H2AC4,H2AC17,H2AC20,H2BC13,H2BC15,H2BC14,H2BC9,H2BC17,H2BC21,H3C1,H3C4,H3C3,H3C6,H3C8,H3C12,H3C10,H3C2,H4C4,H4C6,H4C12,H4C11,H4C3,H4C8,H4C2,H4C5,H4C13,H3C7,H2AC11,H2BC11,H2AC12,H4-16,H2AC21,H2BC18,H3C13
1_Member	Reactome Gene Sets	R-HSA-2559583	Cellular Senescence	-49.8957	-46.7892	45/197	1021,1912,2353,3006,3007,3008,3009,3012,3013,3017,3024,4217,8091,8294,8331,8334,8335,8338,8340,8341,8342,8345,8348,8349,8350,8351,8352,8353,8355,8356,8357,8358,8360,8361,8362,8363,8364,8365,8366,8367,8368,8968,8970,121504,653604	CDK6,PHC2,FOS,H1-2,H1-3,H1-4,H1-5,H2AC8,H2AC7,H2BC5,H1-1,MAP3K5,HMGA2,H4C9,H2AC14,H2AC6,H2AC4,H2AC20,H2BC13,H2BC15,H2BC14,H2BC9,H2BC17,H2BC21,H3C1,H3C4,H3C3,H3C6,H3C8,H3C12,H3C10,H3C2,H4C4,H4C6,H4C12,H4C11,H4C3,H4C8,H4C2,H4C5,H4C13,H3C7,H2BC11,H4-16,H3C13
1_Member	KEGG Pathway	hsa05034	Alcoholism	-49.6188	-46.5358	44/185	3012,3013,3017,4915,8294,8329,8330,8331,8332,8334,8335,8336,8338,8340,8341,8342,8345,8348,8349,8350,8351,8352,8353,8355,8356,8357,8358,8360,8361,8362,8363,8364,8365,8366,8367,8368,8968,8969,8970,85235,121504,317772,440689,653604	H2AC8,H2AC7,H2BC5,NTRK2,H4C9,H2AC13,H2AC15,H2AC14,H2AC16,H2AC6,H2AC4,H2AC17,H2AC20,H2BC13,H2BC15,H2BC14,H2BC9,H2BC17,H2BC21,H3C1,H3C4,H3C3,H3C6,H3C8,H3C12,H3C10,H3C2,H4C4,H4C6,H4C12,H4C11,H4C3,H4C8,H4C2,H4C5,H4C13,H3C7,H2AC11,H2BC11,H2AC12,H4-16,H2AC21,H2BC18,H3C13
1_Member	Reactome Gene Sets	R-HSA-2559580	Oxidative Stress Induced Senescence	-49.1296	-46.0689	39/125	1021,1912,2353,3012,3013,3017,4217,8294,8331,8334,8335,8338,8340,8341,8342,8345,8348,8349,8350,8351,8352,8353,8355,8356,8357,8358,8360,8361,8362,8363,8364,8365,8366,8367,8368,8968,8970,121504,653604	CDK6,PHC2,FOS,H2AC8,H2AC7,H2BC5,MAP3K5,H4C9,H2AC14,H2AC6,H2AC4,H2AC20,H2BC13,H2BC15,H2BC14,H2BC9,H2BC17,H2BC21,H3C1,H3C4,H3C3,H3C6,H3C8,H3C12,H3C10,H3C2,H4C4,H4C6,H4C12,H4C11,H4C3,H4C8,H4C2,H4C5,H4C13,H3C7,H2BC11,H4-16,H3C13
1_Member	Reactome Gene Sets	R-HSA-912446	Meiotic recombination	-48.9355	-45.896	35/86	3012,3013,3017,8294,8331,8334,8335,8338,8340,8341,8342,8345,8348,8349,8350,8351,8352,8353,8355,8356,8357,8358,8360,8361,8362,8363,8364,8365,8366,8367,8368,8968,8970,121504,653604	H2AC8,H2AC7,H2BC5,H4C9,H2AC14,H2AC6,H2AC4,H2AC20,H2BC13,H2BC15,H2BC14,H2BC9,H2BC17,H2BC21,H3C1,H3C4,H3C3,H3C6,H3C8,H3C12,H3C10,H3C2,H4C4,H4C6,H4C12,H4C11,H4C3,H4C8,H4C2,H4C5,H4C13,H3C7,H2BC11,H4-16,H3C13
1_Member	Reactome Gene Sets	R-HSA-3214858	RMTs methylate histone arginines	-48.5757	-45.5565	34/79	3012,3013,8294,8329,8330,8331,8332,8334,8335,8336,8338,8350,8351,8352,8353,8355,8356,8357,8358,8360,8361,8362,8363,8364,8365,8366,8367,8368,8968,8969,85235,121504,317772,653604	H2AC8,H2AC7,H4C9,H2AC13,H2AC15,H2AC14,H2AC16,H2AC6,H2AC4,H2AC17,H2AC20,H3C1,H3C4,H3C3,H3C6,H3C8,H3C12,H3C10,H3C2,H4C4,H4C6,H4C12,H4C11,H4C3,H4C8,H4C2,H4C5,H4C13,H3C7,H2AC11,H2AC12,H4-16,H2AC21,H3C13
1_Member	Reactome Gene Sets	R-HSA-9616222	Transcriptional regulation of granulopoiesis	-48.0738	-45.0738	35/90	3012,3013,3017,8294,8331,8334,8335,8338,8340,8341,8342,8345,8348,8349,8350,8351,8352,8353,8355,8356,8357,8358,8360,8361,8362,8363,8364,8365,8366,8367,8368,8968,8970,121504,653604	H2AC8,H2AC7,H2BC5,H4C9,H2AC14,H2AC6,H2AC4,H2AC20,H2BC13,H2BC15,H2BC14,H2BC9,H2BC17,H2BC21,H3C1,H3C4,H3C3,H3C6,H3C8,H3C12,H3C10,H3C2,H4C4,H4C6,H4C12,H4C11,H4C3,H4C8,H4C2,H4C5,H4C13,H3C7,H2BC11,H4-16,H3C13
1_Member	Reactome Gene Sets	R-HSA-201722	Formation of the beta-catenin:TCF transactivating complex	-47.8662	-44.9194	35/91	3012,3013,3017,8294,8331,8334,8335,8338,8340,8341,8342,8345,8348,8349,8350,8351,8352,8353,8355,8356,8357,8358,8360,8361,8362,8363,8364,8365,8366,8367,8368,8968,8970,121504,653604	H2AC8,H2AC7,H2BC5,H4C9,H2AC14,H2AC6,H2AC4,H2AC20,H2BC13,H2BC15,H2BC14,H2BC9,H2BC17,H2BC21,H3C1,H3C4,H3C3,H3C6,H3C8,H3C12,H3C10,H3C2,H4C4,H4C6,H4C12,H4C11,H4C3,H4C8,H4C2,H4C5,H4C13,H3C7,H2BC11,H4-16,H3C13
1_Member	Reactome Gene Sets	R-HSA-5250924	B-WICH complex positively regulates rRNA expression	-47.8662	-44.9194	35/91	3012,3013,3017,8294,8331,8334,8335,8338,8340,8341,8342,8345,8348,8349,8350,8351,8352,8353,8355,8356,8357,8358,8360,8361,8362,8363,8364,8365,8366,8367,8368,8968,8970,121504,653604	H2AC8,H2AC7,H2BC5,H4C9,H2AC14,H2AC6,H2AC4,H2AC20,H2BC13,H2BC15,H2BC14,H2BC9,H2BC17,H2BC21,H3C1,H3C4,H3C3,H3C6,H3C8,H3C12,H3C10,H3C2,H4C4,H4C6,H4C12,H4C11,H4C3,H4C8,H4C2,H4C5,H4C13,H3C7,H2BC11,H4-16,H3C13
1_Member	Reactome Gene Sets	R-HSA-73772	RNA Polymerase I Promoter Escape	-47.8662	-44.9194	35/91	3012,3013,3017,8294,8331,8334,8335,8338,8340,8341,8342,8345,8348,8349,8350,8351,8352,8353,8355,8356,8357,8358,8360,8361,8362,8363,8364,8365,8366,8367,8368,8968,8970,121504,653604	H2AC8,H2AC7,H2BC5,H4C9,H2AC14,H2AC6,H2AC4,H2AC20,H2BC13,H2BC15,H2BC14,H2BC9,H2BC17,H2BC21,H3C1,H3C4,H3C3,H3C6,H3C8,H3C12,H3C10,H3C2,H4C4,H4C6,H4C12,H4C11,H4C3,H4C8,H4C2,H4C5,H4C13,H3C7,H2BC11,H4-16,H3C13
1_Member	Reactome Gene Sets	R-HSA-2559582	Senescence-Associated Secretory Phenotype (SASP)	-47.6678	-44.7375	37/112	1021,2353,3012,3013,3017,8294,8331,8334,8335,8338,8340,8341,8342,8345,8348,8349,8350,8351,8352,8353,8355,8356,8357,8358,8360,8361,8362,8363,8364,8365,8366,8367,8368,8968,8970,121504,653604	CDK6,FOS,H2AC8,H2AC7,H2BC5,H4C9,H2AC14,H2AC6,H2AC4,H2AC20,H2BC13,H2BC15,H2BC14,H2BC9,H2BC17,H2BC21,H3C1,H3C4,H3C3,H3C6,H3C8,H3C12,H3C10,H3C2,H4C4,H4C6,H4C12,H4C11,H4C3,H4C8,H4C2,H4C5,H4C13,H3C7,H2BC11,H4-16,H3C13
1_Member	Reactome Gene Sets	R-HSA-1912408	Pre-NOTCH Transcription and Translation	-47.4597	-44.5451	35/93	3012,3013,3017,8294,8331,8334,8335,8338,8340,8341,8342,8345,8348,8349,8350,8351,8352,8353,8355,8356,8357,8358,8360,8361,8362,8363,8364,8365,8366,8367,8368,8968,8970,121504,653604	H2AC8,H2AC7,H2BC5,H4C9,H2AC14,H2AC6,H2AC4,H2AC20,H2BC13,H2BC15,H2BC14,H2BC9,H2BC17,H2BC21,H3C1,H3C4,H3C3,H3C6,H3C8,H3C12,H3C10,H3C2,H4C4,H4C6,H4C12,H4C11,H4C3,H4C8,H4C2,H4C5,H4C13,H3C7,H2BC11,H4-16,H3C13
1_Member	Reactome Gene Sets	R-HSA-8936459	RUNX1 regulates genes involved in megakaryocyte differentiation and platelet function	-46.6794	-43.7801	35/97	3012,3013,3017,8294,8331,8334,8335,8338,8340,8341,8342,8345,8348,8349,8350,8351,8352,8353,8355,8356,8357,8358,8360,8361,8362,8363,8364,8365,8366,8367,8368,8968,8970,121504,653604	H2AC8,H2AC7,H2BC5,H4C9,H2AC14,H2AC6,H2AC4,H2AC20,H2BC13,H2BC15,H2BC14,H2BC9,H2BC17,H2BC21,H3C1,H3C4,H3C3,H3C6,H3C8,H3C12,H3C10,H3C2,H4C4,H4C6,H4C12,H4C11,H4C3,H4C8,H4C2,H4C5,H4C13,H3C7,H2BC11,H4-16,H3C13
1_Member	Reactome Gene Sets	R-HSA-1912422	Pre-NOTCH Expression and Processing	-46.3651	-43.4805	36/109	3012,3013,3017,3955,8294,8331,8334,8335,8338,8340,8341,8342,8345,8348,8349,8350,8351,8352,8353,8355,8356,8357,8358,8360,8361,8362,8363,8364,8365,8366,8367,8368,8968,8970,121504,653604	H2AC8,H2AC7,H2BC5,LFNG,H4C9,H2AC14,H2AC6,H2AC4,H2AC20,H2BC13,H2BC15,H2BC14,H2BC9,H2BC17,H2BC21,H3C1,H3C4,H3C3,H3C6,H3C8,H3C12,H3C10,H3C2,H4C4,H4C6,H4C12,H4C11,H4C3,H4C8,H4C2,H4C5,H4C13,H3C7,H2BC11,H4-16,H3C13
1_Member	Reactome Gene Sets	R-HSA-9645723	Diseases of programmed cell death	-45.5827	-42.7124	35/103	3012,3013,3017,8294,8331,8334,8335,8338,8340,8341,8342,8345,8348,8349,8350,8351,8352,8353,8355,8356,8357,8358,8360,8361,8362,8363,8364,8365,8366,8367,8368,8968,8970,121504,653604	H2AC8,H2AC7,H2BC5,H4C9,H2AC14,H2AC6,H2AC4,H2AC20,H2BC13,H2BC15,H2BC14,H2BC9,H2BC17,H2BC21,H3C1,H3C4,H3C3,H3C6,H3C8,H3C12,H3C10,H3C2,H4C4,H4C6,H4C12,H4C11,H4C3,H4C8,H4C2,H4C5,H4C13,H3C7,H2BC11,H4-16,H3C13
1_Member	Reactome Gene Sets	R-HSA-5250913	Positive epigenetic regulation of rRNA expression	-45.0641	-42.2209	35/106	3012,3013,3017,8294,8331,8334,8335,8338,8340,8341,8342,8345,8348,8349,8350,8351,8352,8353,8355,8356,8357,8358,8360,8361,8362,8363,8364,8365,8366,8367,8368,8968,8970,121504,653604	H2AC8,H2AC7,H2BC5,H4C9,H2AC14,H2AC6,H2AC4,H2AC20,H2BC13,H2BC15,H2BC14,H2BC9,H2BC17,H2BC21,H3C1,H3C4,H3C3,H3C6,H3C8,H3C12,H3C10,H3C2,H4C4,H4C6,H4C12,H4C11,H4C3,H4C8,H4C2,H4C5,H4C13,H3C7,H2BC11,H4-16,H3C13
1_Member	Reactome Gene Sets	R-HSA-5578749	Transcriptional regulation by small RNAs	-45.0641	-42.2209	35/106	3012,3013,3017,8294,8331,8334,8335,8338,8340,8341,8342,8345,8348,8349,8350,8351,8352,8353,8355,8356,8357,8358,8360,8361,8362,8363,8364,8365,8366,8367,8368,8968,8970,121504,653604	H2AC8,H2AC7,H2BC5,H4C9,H2AC14,H2AC6,H2AC4,H2AC20,H2BC13,H2BC15,H2BC14,H2BC9,H2BC17,H2BC21,H3C1,H3C4,H3C3,H3C6,H3C8,H3C12,H3C10,H3C2,H4C4,H4C6,H4C12,H4C11,H4C3,H4C8,H4C2,H4C5,H4C13,H3C7,H2BC11,H4-16,H3C13
1_Member	Reactome Gene Sets	R-HSA-427413	NoRC negatively regulates rRNA expression	-44.8953	-42.065	35/107	3012,3013,3017,8294,8331,8334,8335,8338,8340,8341,8342,8345,8348,8349,8350,8351,8352,8353,8355,8356,8357,8358,8360,8361,8362,8363,8364,8365,8366,8367,8368,8968,8970,121504,653604	H2AC8,H2AC7,H2BC5,H4C9,H2AC14,H2AC6,H2AC4,H2AC20,H2BC13,H2BC15,H2BC14,H2BC9,H2BC17,H2BC21,H3C1,H3C4,H3C3,H3C6,H3C8,H3C12,H3C10,H3C2,H4C4,H4C6,H4C12,H4C11,H4C3,H4C8,H4C2,H4C5,H4C13,H3C7,H2BC11,H4-16,H3C13
1_Member	Reactome Gene Sets	R-HSA-5250941	Negative epigenetic regulation of rRNA expression	-44.4003	-41.5949	35/110	3012,3013,3017,8294,8331,8334,8335,8338,8340,8341,8342,8345,8348,8349,8350,8351,8352,8353,8355,8356,8357,8358,8360,8361,8362,8363,8364,8365,8366,8367,8368,8968,8970,121504,653604	H2AC8,H2AC7,H2BC5,H4C9,H2AC14,H2AC6,H2AC4,H2AC20,H2BC13,H2BC15,H2BC14,H2BC9,H2BC17,H2BC21,H3C1,H3C4,H3C3,H3C6,H3C8,H3C12,H3C10,H3C2,H4C4,H4C6,H4C12,H4C11,H4C3,H4C8,H4C2,H4C5,H4C13,H3C7,H2BC11,H4-16,H3C13
1_Member	Reactome Gene Sets	R-HSA-73854	RNA Polymerase I Promoter Clearance	-44.4003	-41.5949	35/110	3012,3013,3017,8294,8331,8334,8335,8338,8340,8341,8342,8345,8348,8349,8350,8351,8352,8353,8355,8356,8357,8358,8360,8361,8362,8363,8364,8365,8366,8367,8368,8968,8970,121504,653604	H2AC8,H2AC7,H2BC5,H4C9,H2AC14,H2AC6,H2AC4,H2AC20,H2BC13,H2BC15,H2BC14,H2BC9,H2BC17,H2BC21,H3C1,H3C4,H3C3,H3C6,H3C8,H3C12,H3C10,H3C2,H4C4,H4C6,H4C12,H4C11,H4C3,H4C8,H4C2,H4C5,H4C13,H3C7,H2BC11,H4-16,H3C13
1_Member	Reactome Gene Sets	R-HSA-977225	Amyloid fiber formation	-44.2391	-41.4456	35/111	3012,3013,3017,8294,8331,8334,8335,8338,8340,8341,8342,8345,8348,8349,8350,8351,8352,8353,8355,8356,8357,8358,8360,8361,8362,8363,8364,8365,8366,8367,8368,8968,8970,121504,653604	H2AC8,H2AC7,H2BC5,H4C9,H2AC14,H2AC6,H2AC4,H2AC20,H2BC13,H2BC15,H2BC14,H2BC9,H2BC17,H2BC21,H3C1,H3C4,H3C3,H3C6,H3C8,H3C12,H3C10,H3C2,H4C4,H4C6,H4C12,H4C11,H4C3,H4C8,H4C2,H4C5,H4C13,H3C7,H2BC11,H4-16,H3C13
1_Member	Reactome Gene Sets	R-HSA-73864	RNA Polymerase I Transcription	-44.0796	-41.2976	35/112	3012,3013,3017,8294,8331,8334,8335,8338,8340,8341,8342,8345,8348,8349,8350,8351,8352,8353,8355,8356,8357,8358,8360,8361,8362,8363,8364,8365,8366,8367,8368,8968,8970,121504,653604	H2AC8,H2AC7,H2BC5,H4C9,H2AC14,H2AC6,H2AC4,H2AC20,H2BC13,H2BC15,H2BC14,H2BC9,H2BC17,H2BC21,H3C1,H3C4,H3C3,H3C6,H3C8,H3C12,H3C10,H3C2,H4C4,H4C6,H4C12,H4C11,H4C3,H4C8,H4C2,H4C5,H4C13,H3C7,H2BC11,H4-16,H3C13
1_Member	Reactome Gene Sets	R-HSA-1500620	Meiosis	-43.1579	-40.3873	35/118	3012,3013,3017,8294,8331,8334,8335,8338,8340,8341,8342,8345,8348,8349,8350,8351,8352,8353,8355,8356,8357,8358,8360,8361,8362,8363,8364,8365,8366,8367,8368,8968,8970,121504,653604	H2AC8,H2AC7,H2BC5,H4C9,H2AC14,H2AC6,H2AC4,H2AC20,H2BC13,H2BC15,H2BC14,H2BC9,H2BC17,H2BC21,H3C1,H3C4,H3C3,H3C6,H3C8,H3C12,H3C10,H3C2,H4C4,H4C6,H4C12,H4C11,H4C3,H4C8,H4C2,H4C5,H4C13,H3C7,H2BC11,H4-16,H3C13
1_Member	Reactome Gene Sets	R-HSA-3247509	Chromatin modifying enzymes	-42.9809	-40.232	45/274	3012,3013,3017,8242,8294,8329,8330,8331,8332,8334,8335,8336,8338,8340,8341,8342,8345,8348,8349,8350,8351,8352,8353,8355,8356,8357,8358,8360,8361,8362,8363,8364,8365,8366,8367,8368,8968,8969,8970,11240,85235,121504,317772,440689,653604	H2AC8,H2AC7,H2BC5,KDM5C,H4C9,H2AC13,H2AC15,H2AC14,H2AC16,H2AC6,H2AC4,H2AC17,H2AC20,H2BC13,H2BC15,H2BC14,H2BC9,H2BC17,H2BC21,H3C1,H3C4,H3C3,H3C6,H3C8,H3C12,H3C10,H3C2,H4C4,H4C6,H4C12,H4C11,H4C3,H4C8,H4C2,H4C5,H4C13,H3C7,H2AC11,H2BC11,PADI2,H2AC12,H4-16,H2AC21,H2BC18,H3C13
1_Member	Reactome Gene Sets	R-HSA-4839726	Chromatin organization	-42.9809	-40.232	45/274	3012,3013,3017,8242,8294,8329,8330,8331,8332,8334,8335,8336,8338,8340,8341,8342,8345,8348,8349,8350,8351,8352,8353,8355,8356,8357,8358,8360,8361,8362,8363,8364,8365,8366,8367,8368,8968,8969,8970,11240,85235,121504,317772,440689,653604	H2AC8,H2AC7,H2BC5,KDM5C,H4C9,H2AC13,H2AC15,H2AC14,H2AC16,H2AC6,H2AC4,H2AC17,H2AC20,H2BC13,H2BC15,H2BC14,H2BC9,H2BC17,H2BC21,H3C1,H3C4,H3C3,H3C6,H3C8,H3C12,H3C10,H3C2,H4C4,H4C6,H4C12,H4C11,H4C3,H4C8,H4C2,H4C5,H4C13,H3C7,H2AC11,H2BC11,PADI2,H2AC12,H4-16,H2AC21,H2BC18,H3C13
1_Member	Reactome Gene Sets	R-HSA-5617472	Activation of anterior HOX genes in hindbrain development during early embryogenesis	-42.7183	-39.9901	35/121	3012,3013,3017,8294,8331,8334,8335,8338,8340,8341,8342,8345,8348,8349,8350,8351,8352,8353,8355,8356,8357,8358,8360,8361,8362,8363,8364,8365,8366,8367,8368,8968,8970,121504,653604	H2AC8,H2AC7,H2BC5,H4C9,H2AC14,H2AC6,H2AC4,H2AC20,H2BC13,H2BC15,H2BC14,H2BC9,H2BC17,H2BC21,H3C1,H3C4,H3C3,H3C6,H3C8,H3C12,H3C10,H3C2,H4C4,H4C6,H4C12,H4C11,H4C3,H4C8,H4C2,H4C5,H4C13,H3C7,H2BC11,H4-16,H3C13
1_Member	Reactome Gene Sets	R-HSA-5619507	Activation of HOX genes during differentiation	-42.7183	-39.9901	35/121	3012,3013,3017,8294,8331,8334,8335,8338,8340,8341,8342,8345,8348,8349,8350,8351,8352,8353,8355,8356,8357,8358,8360,8361,8362,8363,8364,8365,8366,8367,8368,8968,8970,121504,653604	H2AC8,H2AC7,H2BC5,H4C9,H2AC14,H2AC6,H2AC4,H2AC20,H2BC13,H2BC15,H2BC14,H2BC9,H2BC17,H2BC21,H3C1,H3C4,H3C3,H3C6,H3C8,H3C12,H3C10,H3C2,H4C4,H4C6,H4C12,H4C11,H4C3,H4C8,H4C2,H4C5,H4C13,H3C7,H2BC11,H4-16,H3C13
1_Member	Reactome Gene Sets	R-HSA-2559586	DNA Damage/Telomere Stress Induced Senescence	-42.5005	-39.7822	31/80	3006,3007,3008,3009,3012,3013,3017,3024,8091,8294,8331,8334,8335,8338,8340,8341,8342,8345,8348,8349,8360,8361,8362,8363,8364,8365,8366,8367,8368,8970,121504	H1-2,H1-3,H1-4,H1-5,H2AC8,H2AC7,H2BC5,H1-1,HMGA2,H4C9,H2AC14,H2AC6,H2AC4,H2AC20,H2BC13,H2BC15,H2BC14,H2BC9,H2BC17,H2BC21,H4C4,H4C6,H4C12,H4C11,H4C3,H4C8,H4C2,H4C5,H4C13,H2BC11,H4-16
1_Member	Reactome Gene Sets	R-HSA-212165	Epigenetic regulation of gene expression	-42.402	-39.6935	37/149	3012,3013,3017,8294,8331,8334,8335,8338,8340,8341,8342,8345,8348,8349,8350,8351,8352,8353,8355,8356,8357,8358,8360,8361,8362,8363,8364,8365,8366,8367,8368,8968,8970,54790,80312,121504,653604	H2AC8,H2AC7,H2BC5,H4C9,H2AC14,H2AC6,H2AC4,H2AC20,H2BC13,H2BC15,H2BC14,H2BC9,H2BC17,H2BC21,H3C1,H3C4,H3C3,H3C6,H3C8,H3C12,H3C10,H3C2,H4C4,H4C6,H4C12,H4C11,H4C3,H4C8,H4C2,H4C5,H4C13,H3C7,H2BC11,TET2,TET1,H4-16,H3C13
1_Member	GO Biological Processes	GO:0006334	nucleosome assembly	-41.6077	-38.9087	35/129	3006,3007,3008,3009,3017,3024,8294,8340,8341,8342,8345,8348,8349,8350,8351,8352,8353,8355,8356,8357,8358,8360,8361,8362,8363,8364,8365,8366,8367,8368,8968,8970,121504,440689,653604	H1-2,H1-3,H1-4,H1-5,H2BC5,H1-1,H4C9,H2BC13,H2BC15,H2BC14,H2BC9,H2BC17,H2BC21,H3C1,H3C4,H3C3,H3C6,H3C8,H3C12,H3C10,H3C2,H4C4,H4C6,H4C12,H4C11,H4C3,H4C8,H4C2,H4C5,H4C13,H3C7,H2BC11,H4-16,H2BC18,H3C13
1_Member	Reactome Gene Sets	R-HSA-8939236	RUNX1 regulates transcription of genes involved in differentiation of HSCs	-41.4747	-38.7851	35/130	3012,3013,3017,8294,8331,8334,8335,8338,8340,8341,8342,8345,8348,8349,8350,8351,8352,8353,8355,8356,8357,8358,8360,8361,8362,8363,8364,8365,8366,8367,8368,8968,8970,121504,653604	H2AC8,H2AC7,H2BC5,H4C9,H2AC14,H2AC6,H2AC4,H2AC20,H2BC13,H2BC15,H2BC14,H2BC9,H2BC17,H2BC21,H3C1,H3C4,H3C3,H3C6,H3C8,H3C12,H3C10,H3C2,H4C4,H4C6,H4C12,H4C11,H4C3,H4C8,H4C2,H4C5,H4C13,H3C7,H2BC11,H4-16,H3C13
1_Member	Reactome Gene Sets	R-HSA-9018519	Estrogen-dependent gene expression	-40.6549	-37.9744	36/150	2353,3012,3013,3017,8294,8331,8334,8335,8338,8340,8341,8342,8345,8348,8349,8350,8351,8352,8353,8355,8356,8357,8358,8360,8361,8362,8363,8364,8365,8366,8367,8368,8968,8970,121504,653604	FOS,H2AC8,H2AC7,H2BC5,H4C9,H2AC14,H2AC6,H2AC4,H2AC20,H2BC13,H2BC15,H2BC14,H2BC9,H2BC17,H2BC21,H3C1,H3C4,H3C3,H3C6,H3C8,H3C12,H3C10,H3C2,H4C4,H4C6,H4C12,H4C11,H4C3,H4C8,H4C2,H4C5,H4C13,H3C7,H2BC11,H4-16,H3C13
1_Member	Reactome Gene Sets	R-HSA-211000	Gene Silencing by RNA	-40.453	-37.7815	35/138	3012,3013,3017,8294,8331,8334,8335,8338,8340,8341,8342,8345,8348,8349,8350,8351,8352,8353,8355,8356,8357,8358,8360,8361,8362,8363,8364,8365,8366,8367,8368,8968,8970,121504,653604	H2AC8,H2AC7,H2BC5,H4C9,H2AC14,H2AC6,H2AC4,H2AC20,H2BC13,H2BC15,H2BC14,H2BC9,H2BC17,H2BC21,H3C1,H3C4,H3C3,H3C6,H3C8,H3C12,H3C10,H3C2,H4C4,H4C6,H4C12,H4C11,H4C3,H4C8,H4C2,H4C5,H4C13,H3C7,H2BC11,H4-16,H3C13
1_Member	Reactome Gene Sets	R-HSA-68875	Mitotic Prophase	-39.9682	-37.3054	35/142	3012,3013,3017,8294,8331,8334,8335,8338,8340,8341,8342,8345,8348,8349,8350,8351,8352,8353,8355,8356,8357,8358,8360,8361,8362,8363,8364,8365,8366,8367,8368,8968,8970,121504,653604	H2AC8,H2AC7,H2BC5,H4C9,H2AC14,H2AC6,H2AC4,H2AC20,H2BC13,H2BC15,H2BC14,H2BC9,H2BC17,H2BC21,H3C1,H3C4,H3C3,H3C6,H3C8,H3C12,H3C10,H3C2,H4C4,H4C6,H4C12,H4C11,H4C3,H4C8,H4C2,H4C5,H4C13,H3C7,H2BC11,H4-16,H3C13
1_Member	Reactome Gene Sets	R-HSA-1474165	Reproduction	-39.8495	-37.1954	35/143	3012,3013,3017,8294,8331,8334,8335,8338,8340,8341,8342,8345,8348,8349,8350,8351,8352,8353,8355,8356,8357,8358,8360,8361,8362,8363,8364,8365,8366,8367,8368,8968,8970,121504,653604	H2AC8,H2AC7,H2BC5,H4C9,H2AC14,H2AC6,H2AC4,H2AC20,H2BC13,H2BC15,H2BC14,H2BC9,H2BC17,H2BC21,H3C1,H3C4,H3C3,H3C6,H3C8,H3C12,H3C10,H3C2,H4C4,H4C6,H4C12,H4C11,H4C3,H4C8,H4C2,H4C5,H4C13,H3C7,H2BC11,H4-16,H3C13
1_Member	GO Biological Processes	GO:0031497	chromatin assembly	-38.8783	-36.2326	37/182	3006,3007,3008,3009,3017,3024,8091,8294,8340,8341,8342,8345,8348,8349,8350,8351,8352,8353,8355,8356,8357,8358,8360,8361,8362,8363,8364,8365,8366,8367,8368,8968,8970,80312,121504,440689,653604	H1-2,H1-3,H1-4,H1-5,H2BC5,H1-1,HMGA2,H4C9,H2BC13,H2BC15,H2BC14,H2BC9,H2BC17,H2BC21,H3C1,H3C4,H3C3,H3C6,H3C8,H3C12,H3C10,H3C2,H4C4,H4C6,H4C12,H4C11,H4C3,H4C8,H4C2,H4C5,H4C13,H3C7,H2BC11,TET1,H4-16,H2BC18,H3C13
1_Member	GO Biological Processes	GO:0006333	chromatin assembly or disassembly	-38.137	-35.4996	38/207	3006,3007,3008,3009,3017,3024,8091,8294,8340,8341,8342,8345,8348,8349,8350,8351,8352,8353,8355,8356,8357,8358,8360,8361,8362,8363,8364,8365,8366,8367,8368,8968,8970,11240,80312,121504,440689,653604	H1-2,H1-3,H1-4,H1-5,H2BC5,H1-1,HMGA2,H4C9,H2BC13,H2BC15,H2BC14,H2BC9,H2BC17,H2BC21,H3C1,H3C4,H3C3,H3C6,H3C8,H3C12,H3C10,H3C2,H4C4,H4C6,H4C12,H4C11,H4C3,H4C8,H4C2,H4C5,H4C13,H3C7,H2BC11,PADI2,TET1,H4-16,H2BC18,H3C13
1_Member	Reactome Gene Sets	R-HSA-171306	Packaging Of Telomere Ends	-37.2836	-34.6543	25/52	3012,3013,3017,8294,8331,8334,8335,8338,8340,8341,8342,8345,8348,8349,8360,8361,8362,8363,8364,8365,8366,8367,8368,8970,121504	H2AC8,H2AC7,H2BC5,H4C9,H2AC14,H2AC6,H2AC4,H2AC20,H2BC13,H2BC15,H2BC14,H2BC9,H2BC17,H2BC21,H4C4,H4C6,H4C12,H4C11,H4C3,H4C8,H4C2,H4C5,H4C13,H2BC11,H4-16
1_Member	GO Biological Processes	GO:0034728	nucleosome organization	-37.2624	-34.6411	35/167	3006,3007,3008,3009,3017,3024,8294,8340,8341,8342,8345,8348,8349,8350,8351,8352,8353,8355,8356,8357,8358,8360,8361,8362,8363,8364,8365,8366,8367,8368,8968,8970,121504,440689,653604	H1-2,H1-3,H1-4,H1-5,H2BC5,H1-1,H4C9,H2BC13,H2BC15,H2BC14,H2BC9,H2BC17,H2BC21,H3C1,H3C4,H3C3,H3C6,H3C8,H3C12,H3C10,H3C2,H4C4,H4C6,H4C12,H4C11,H4C3,H4C8,H4C2,H4C5,H4C13,H3C7,H2BC11,H4-16,H2BC18,H3C13
1_Member	Reactome Gene Sets	R-HSA-110330	Recognition and association of DNA glycosylase with site containing an affected purine	-36.2298	-33.6315	25/56	3012,3013,3017,8294,8331,8334,8335,8338,8340,8341,8342,8345,8348,8349,8360,8361,8362,8363,8364,8365,8366,8367,8368,8970,121504	H2AC8,H2AC7,H2BC5,H4C9,H2AC14,H2AC6,H2AC4,H2AC20,H2BC13,H2BC15,H2BC14,H2BC9,H2BC17,H2BC21,H4C4,H4C6,H4C12,H4C11,H4C3,H4C8,H4C2,H4C5,H4C13,H2BC11,H4-16
1_Member	Reactome Gene Sets	R-HSA-110331	Cleavage of the damaged purine	-36.2298	-33.6315	25/56	3012,3013,3017,8294,8331,8334,8335,8338,8340,8341,8342,8345,8348,8349,8360,8361,8362,8363,8364,8365,8366,8367,8368,8970,121504	H2AC8,H2AC7,H2BC5,H4C9,H2AC14,H2AC6,H2AC4,H2AC20,H2BC13,H2BC15,H2BC14,H2BC9,H2BC17,H2BC21,H4C4,H4C6,H4C12,H4C11,H4C3,H4C8,H4C2,H4C5,H4C13,H2BC11,H4-16
1_Member	Reactome Gene Sets	R-HSA-73927	Depurination	-36.2298	-33.6315	25/56	3012,3013,3017,8294,8331,8334,8335,8338,8340,8341,8342,8345,8348,8349,8360,8361,8362,8363,8364,8365,8366,8367,8368,8970,121504	H2AC8,H2AC7,H2BC5,H4C9,H2AC14,H2AC6,H2AC4,H2AC20,H2BC13,H2BC15,H2BC14,H2BC9,H2BC17,H2BC21,H4C4,H4C6,H4C12,H4C11,H4C3,H4C8,H4C2,H4C5,H4C13,H2BC11,H4-16
1_Member	Reactome Gene Sets	R-HSA-201681	TCF dependent signaling in response to WNT	-36.0815	-33.4907	38/233	3012,3013,3017,6657,7474,8294,8331,8334,8335,8338,8340,8341,8342,8345,8348,8349,8350,8351,8352,8353,8355,8356,8357,8358,8360,8361,8362,8363,8364,8365,8366,8367,8368,8549,8968,8970,121504,653604	H2AC8,H2AC7,H2BC5,SOX2,WNT5A,H4C9,H2AC14,H2AC6,H2AC4,H2AC20,H2BC13,H2BC15,H2BC14,H2BC9,H2BC17,H2BC21,H3C1,H3C4,H3C3,H3C6,H3C8,H3C12,H3C10,H3C2,H4C4,H4C6,H4C12,H4C11,H4C3,H4C8,H4C2,H4C5,H4C13,LGR5,H3C7,H2BC11,H4-16,H3C13
1_Member	Reactome Gene Sets	R-HSA-157118	Signaling by NOTCH	-35.8613	-33.2778	38/236	182,3012,3013,3017,3955,8294,8331,8334,8335,8338,8340,8341,8342,8345,8348,8349,8350,8351,8352,8353,8355,8356,8357,8358,8360,8361,8362,8363,8364,8365,8366,8367,8368,8968,8970,23129,121504,653604	JAG1,H2AC8,H2AC7,H2BC5,LFNG,H4C9,H2AC14,H2AC6,H2AC4,H2AC20,H2BC13,H2BC15,H2BC14,H2BC9,H2BC17,H2BC21,H3C1,H3C4,H3C3,H3C6,H3C8,H3C12,H3C10,H3C2,H4C4,H4C6,H4C12,H4C11,H4C3,H4C8,H4C2,H4C5,H4C13,H3C7,H2BC11,PLXND1,H4-16,H3C13
1_Member	Reactome Gene Sets	R-HSA-8939211	ESR-mediated signaling	-35.4121	-32.8357	37/223	2353,3012,3013,3017,8294,8331,8334,8335,8338,8340,8341,8342,8345,8348,8349,8350,8351,8352,8353,8355,8356,8357,8358,8360,8361,8362,8363,8364,8365,8366,8367,8368,8968,8970,121504,255324,653604	FOS,H2AC8,H2AC7,H2BC5,H4C9,H2AC14,H2AC6,H2AC4,H2AC20,H2BC13,H2BC15,H2BC14,H2BC9,H2BC17,H2BC21,H3C1,H3C4,H3C3,H3C6,H3C8,H3C12,H3C10,H3C2,H4C4,H4C6,H4C12,H4C11,H4C3,H4C8,H4C2,H4C5,H4C13,H3C7,H2BC11,H4-16,EPGN,H3C13
1_Member	Reactome Gene Sets	R-HSA-110328	Recognition and association of DNA glycosylase with site containing an affected pyrimidine	-35.0484	-32.4929	25/61	3012,3013,3017,8294,8331,8334,8335,8338,8340,8341,8342,8345,8348,8349,8360,8361,8362,8363,8364,8365,8366,8367,8368,8970,121504	H2AC8,H2AC7,H2BC5,H4C9,H2AC14,H2AC6,H2AC4,H2AC20,H2BC13,H2BC15,H2BC14,H2BC9,H2BC17,H2BC21,H4C4,H4C6,H4C12,H4C11,H4C3,H4C8,H4C2,H4C5,H4C13,H2BC11,H4-16
1_Member	Reactome Gene Sets	R-HSA-110329	Cleavage of the damaged pyrimidine	-35.0484	-32.4929	25/61	3012,3013,3017,8294,8331,8334,8335,8338,8340,8341,8342,8345,8348,8349,8360,8361,8362,8363,8364,8365,8366,8367,8368,8970,121504	H2AC8,H2AC7,H2BC5,H4C9,H2AC14,H2AC6,H2AC4,H2AC20,H2BC13,H2BC15,H2BC14,H2BC9,H2BC17,H2BC21,H4C4,H4C6,H4C12,H4C11,H4C3,H4C8,H4C2,H4C5,H4C13,H2BC11,H4-16
1_Member	Reactome Gene Sets	R-HSA-73928	Depyrimidination	-35.0484	-32.4929	25/61	3012,3013,3017,8294,8331,8334,8335,8338,8340,8341,8342,8345,8348,8349,8360,8361,8362,8363,8364,8365,8366,8367,8368,8970,121504	H2AC8,H2AC7,H2BC5,H4C9,H2AC14,H2AC6,H2AC4,H2AC20,H2BC13,H2BC15,H2BC14,H2BC9,H2BC17,H2BC21,H4C4,H4C6,H4C12,H4C11,H4C3,H4C8,H4C2,H4C5,H4C13,H2BC11,H4-16
1_Member	GO Biological Processes	GO:0006323	DNA packaging	-34.9666	-32.4178	37/229	3006,3007,3008,3009,3017,3024,8091,8294,8340,8341,8342,8345,8348,8349,8350,8351,8352,8353,8355,8356,8357,8358,8360,8361,8362,8363,8364,8365,8366,8367,8368,8968,8970,80312,121504,440689,653604	H1-2,H1-3,H1-4,H1-5,H2BC5,H1-1,HMGA2,H4C9,H2BC13,H2BC15,H2BC14,H2BC9,H2BC17,H2BC21,H3C1,H3C4,H3C3,H3C6,H3C8,H3C12,H3C10,H3C2,H4C4,H4C6,H4C12,H4C11,H4C3,H4C8,H4C2,H4C5,H4C13,H3C7,H2BC11,TET1,H4-16,H2BC18,H3C13
1_Member	Reactome Gene Sets	R-HSA-73929	Base-Excision Repair, AP Site Formation	-34.6113	-32.0692	25/63	3012,3013,3017,8294,8331,8334,8335,8338,8340,8341,8342,8345,8348,8349,8360,8361,8362,8363,8364,8365,8366,8367,8368,8970,121504	H2AC8,H2AC7,H2BC5,H4C9,H2AC14,H2AC6,H2AC4,H2AC20,H2BC13,H2BC15,H2BC14,H2BC9,H2BC17,H2BC21,H4C4,H4C6,H4C12,H4C11,H4C3,H4C8,H4C2,H4C5,H4C13,H2BC11,H4-16
1_Member	Reactome Gene Sets	R-HSA-8878171	Transcriptional regulation by RUNX1	-34.2529	-31.7173	37/239	1021,1912,3012,3013,3017,8294,8331,8334,8335,8338,8340,8341,8342,8345,8348,8349,8350,8351,8352,8353,8355,8356,8357,8358,8360,8361,8362,8363,8364,8365,8366,8367,8368,8968,8970,121504,653604	CDK6,PHC2,H2AC8,H2AC7,H2BC5,H4C9,H2AC14,H2AC6,H2AC4,H2AC20,H2BC13,H2BC15,H2BC14,H2BC9,H2BC17,H2BC21,H3C1,H3C4,H3C3,H3C6,H3C8,H3C12,H3C10,H3C2,H4C4,H4C6,H4C12,H4C11,H4C3,H4C8,H4C2,H4C5,H4C13,H3C7,H2BC11,H4-16,H3C13
1_Member	Reactome Gene Sets	R-HSA-9670095	Inhibition of DNA recombination at telomere	-33.5934	-31.0642	25/68	3012,3013,3017,8294,8331,8334,8335,8338,8340,8341,8342,8345,8348,8349,8360,8361,8362,8363,8364,8365,8366,8367,8368,8970,121504	H2AC8,H2AC7,H2BC5,H4C9,H2AC14,H2AC6,H2AC4,H2AC20,H2BC13,H2BC15,H2BC14,H2BC9,H2BC17,H2BC21,H4C4,H4C6,H4C12,H4C11,H4C3,H4C8,H4C2,H4C5,H4C13,H2BC11,H4-16
1_Member	GO Biological Processes	GO:0065004	protein-DNA complex assembly	-33.5566	-31.0338	35/210	3006,3007,3008,3009,3017,3024,8294,8340,8341,8342,8345,8348,8349,8350,8351,8352,8353,8355,8356,8357,8358,8360,8361,8362,8363,8364,8365,8366,8367,8368,8968,8970,121504,440689,653604	H1-2,H1-3,H1-4,H1-5,H2BC5,H1-1,H4C9,H2BC13,H2BC15,H2BC14,H2BC9,H2BC17,H2BC21,H3C1,H3C4,H3C3,H3C6,H3C8,H3C12,H3C10,H3C2,H4C4,H4C6,H4C12,H4C11,H4C3,H4C8,H4C2,H4C5,H4C13,H3C7,H2BC11,H4-16,H2BC18,H3C13
1_Member	GO Biological Processes	GO:0006335	DNA replication-dependent nucleosome assembly	-33.093	-30.5825	20/32	8294,8350,8351,8352,8353,8355,8356,8357,8358,8360,8361,8362,8363,8364,8365,8366,8367,8368,8968,121504	H4C9,H3C1,H3C4,H3C3,H3C6,H3C8,H3C12,H3C10,H3C2,H4C4,H4C6,H4C12,H4C11,H4C3,H4C8,H4C2,H4C5,H4C13,H3C7,H4-16
1_Member	GO Biological Processes	GO:0034723	DNA replication-dependent nucleosome organization	-33.093	-30.5825	20/32	8294,8350,8351,8352,8353,8355,8356,8357,8358,8360,8361,8362,8363,8364,8365,8366,8367,8368,8968,121504	H4C9,H3C1,H3C4,H3C3,H3C6,H3C8,H3C12,H3C10,H3C2,H4C4,H4C6,H4C12,H4C11,H4C3,H4C8,H4C2,H4C5,H4C13,H3C7,H4-16
1_Member	Reactome Gene Sets	R-HSA-195721	Signaling by WNT	-32.6205	-30.1161	40/332	3012,3013,3017,5158,6657,7474,8294,8331,8334,8335,8338,8340,8341,8342,8345,8348,8349,8350,8351,8352,8353,8355,8356,8357,8358,8360,8361,8362,8363,8364,8365,8366,8367,8368,8549,8968,8970,23236,121504,653604	H2AC8,H2AC7,H2BC5,PDE6B,SOX2,WNT5A,H4C9,H2AC14,H2AC6,H2AC4,H2AC20,H2BC13,H2BC15,H2BC14,H2BC9,H2BC17,H2BC21,H3C1,H3C4,H3C3,H3C6,H3C8,H3C12,H3C10,H3C2,H4C4,H4C6,H4C12,H4C11,H4C3,H4C8,H4C2,H4C5,H4C13,LGR5,H3C7,H2BC11,PLCB1,H4-16,H3C13
1_Member	Reactome Gene Sets	R-HSA-606279	Deposition of new CENPA-containing nucleosomes at the centromere	-32.4913	-29.9989	25/74	3012,3013,3017,8294,8331,8334,8335,8338,8340,8341,8342,8345,8348,8349,8360,8361,8362,8363,8364,8365,8366,8367,8368,8970,121504	H2AC8,H2AC7,H2BC5,H4C9,H2AC14,H2AC6,H2AC4,H2AC20,H2BC13,H2BC15,H2BC14,H2BC9,H2BC17,H2BC21,H4C4,H4C6,H4C12,H4C11,H4C3,H4C8,H4C2,H4C5,H4C13,H2BC11,H4-16
1_Member	Reactome Gene Sets	R-HSA-774815	Nucleosome assembly	-32.4913	-29.9989	25/74	3012,3013,3017,8294,8331,8334,8335,8338,8340,8341,8342,8345,8348,8349,8360,8361,8362,8363,8364,8365,8366,8367,8368,8970,121504	H2AC8,H2AC7,H2BC5,H4C9,H2AC14,H2AC6,H2AC4,H2AC20,H2BC13,H2BC15,H2BC14,H2BC9,H2BC17,H2BC21,H4C4,H4C6,H4C12,H4C11,H4C3,H4C8,H4C2,H4C5,H4C13,H2BC11,H4-16
1_Member	Reactome Gene Sets	R-HSA-3214842	HDMs demethylate histones	-31.7331	-29.2464	22/50	8242,8294,8350,8351,8352,8353,8355,8356,8357,8358,8360,8361,8362,8363,8364,8365,8366,8367,8368,8968,121504,653604	KDM5C,H4C9,H3C1,H3C4,H3C3,H3C6,H3C8,H3C12,H3C10,H3C2,H4C4,H4C6,H4C12,H4C11,H4C3,H4C8,H4C2,H4C5,H4C13,H3C7,H4-16,H3C13
1_Member	Reactome Gene Sets	R-HSA-1221632	Meiotic synapsis	-31.6552	-29.1743	25/79	3012,3013,3017,8294,8331,8334,8335,8338,8340,8341,8342,8345,8348,8349,8360,8361,8362,8363,8364,8365,8366,8367,8368,8970,121504	H2AC8,H2AC7,H2BC5,H4C9,H2AC14,H2AC6,H2AC4,H2AC20,H2BC13,H2BC15,H2BC14,H2BC9,H2BC17,H2BC21,H4C4,H4C6,H4C12,H4C11,H4C3,H4C8,H4C2,H4C5,H4C13,H2BC11,H4-16
1_Member	GO Biological Processes	GO:0071824	protein-DNA complex subunit organization	-30.8168	-28.3416	35/250	3006,3007,3008,3009,3017,3024,8294,8340,8341,8342,8345,8348,8349,8350,8351,8352,8353,8355,8356,8357,8358,8360,8361,8362,8363,8364,8365,8366,8367,8368,8968,8970,121504,440689,653604	H1-2,H1-3,H1-4,H1-5,H2BC5,H1-1,H4C9,H2BC13,H2BC15,H2BC14,H2BC9,H2BC17,H2BC21,H3C1,H3C4,H3C3,H3C6,H3C8,H3C12,H3C10,H3C2,H4C4,H4C6,H4C12,H4C11,H4C3,H4C8,H4C2,H4C5,H4C13,H3C7,H2BC11,H4-16,H2BC18,H3C13
1_Member	Reactome Gene Sets	R-HSA-9006931	Signaling by Nuclear Receptors	-30.5794	-28.1098	37/299	2353,3012,3013,3017,8294,8331,8334,8335,8338,8340,8341,8342,8345,8348,8349,8350,8351,8352,8353,8355,8356,8357,8358,8360,8361,8362,8363,8364,8365,8366,8367,8368,8968,8970,121504,255324,653604	FOS,H2AC8,H2AC7,H2BC5,H4C9,H2AC14,H2AC6,H2AC4,H2AC20,H2BC13,H2BC15,H2BC14,H2BC9,H2BC17,H2BC21,H3C1,H3C4,H3C3,H3C6,H3C8,H3C12,H3C10,H3C2,H4C4,H4C6,H4C12,H4C11,H4C3,H4C8,H4C2,H4C5,H4C13,H3C7,H2BC11,H4-16,EPGN,H3C13
1_Member	Reactome Gene Sets	R-HSA-195258	RHO GTPase Effectors	-30.3746	-27.9105	38/327	388,3012,3013,3017,8294,8331,8334,8335,8338,8340,8341,8342,8345,8348,8349,8350,8351,8352,8353,8355,8356,8357,8358,8360,8361,8362,8363,8364,8365,8366,8367,8368,8968,8970,26999,94274,121504,653604	RHOB,H2AC8,H2AC7,H2BC5,H4C9,H2AC14,H2AC6,H2AC4,H2AC20,H2BC13,H2BC15,H2BC14,H2BC9,H2BC17,H2BC21,H3C1,H3C4,H3C3,H3C6,H3C8,H3C12,H3C10,H3C2,H4C4,H4C6,H4C12,H4C11,H4C3,H4C8,H4C2,H4C5,H4C13,H3C7,H2BC11,CYFIP2,PPP1R14A,H4-16,H3C13
1_Member	Reactome Gene Sets	R-HSA-73884	Base Excision Repair	-29.7541	-27.2955	25/92	3012,3013,3017,8294,8331,8334,8335,8338,8340,8341,8342,8345,8348,8349,8360,8361,8362,8363,8364,8365,8366,8367,8368,8970,121504	H2AC8,H2AC7,H2BC5,H4C9,H2AC14,H2AC6,H2AC4,H2AC20,H2BC13,H2BC15,H2BC14,H2BC9,H2BC17,H2BC21,H4C4,H4C6,H4C12,H4C11,H4C3,H4C8,H4C2,H4C5,H4C13,H2BC11,H4-16
1_Member	GO Biological Processes	GO:0071103	DNA conformation change	-29.5376	-27.0844	37/319	3006,3007,3008,3009,3017,3024,8091,8294,8340,8341,8342,8345,8348,8349,8350,8351,8352,8353,8355,8356,8357,8358,8360,8361,8362,8363,8364,8365,8366,8367,8368,8968,8970,80312,121504,440689,653604	H1-2,H1-3,H1-4,H1-5,H2BC5,H1-1,HMGA2,H4C9,H2BC13,H2BC15,H2BC14,H2BC9,H2BC17,H2BC21,H3C1,H3C4,H3C3,H3C6,H3C8,H3C12,H3C10,H3C2,H4C4,H4C6,H4C12,H4C11,H4C3,H4C8,H4C2,H4C5,H4C13,H3C7,H2BC11,TET1,H4-16,H2BC18,H3C13
1_Member	Reactome Gene Sets	R-HSA-157579	Telomere Maintenance	-27.2769	-24.829	25/113	3012,3013,3017,8294,8331,8334,8335,8338,8340,8341,8342,8345,8348,8349,8360,8361,8362,8363,8364,8365,8366,8367,8368,8970,121504	H2AC8,H2AC7,H2BC5,H4C9,H2AC14,H2AC6,H2AC4,H2AC20,H2BC13,H2BC15,H2BC14,H2BC9,H2BC17,H2BC21,H4C4,H4C6,H4C12,H4C11,H4C3,H4C8,H4C2,H4C5,H4C13,H2BC11,H4-16
1_Member	WikiPathways	WP2369	Histone modifications	-26.075	-23.6323	21/70	8294,8350,8351,8352,8353,8355,8356,8357,8358,8360,8361,8362,8363,8364,8365,8366,8367,8368,8968,121504,653604	H4C9,H3C1,H3C4,H3C3,H3C6,H3C8,H3C12,H3C10,H3C2,H4C4,H4C6,H4C12,H4C11,H4C3,H4C8,H4C2,H4C5,H4C13,H3C7,H4-16,H3C13
1_Member	Reactome Gene Sets	R-HSA-3214841	PKMTs methylate histone lysines	-25.926	-23.4886	21/71	8294,8350,8351,8352,8353,8355,8356,8357,8358,8360,8361,8362,8363,8364,8365,8366,8367,8368,8968,121504,653604	H4C9,H3C1,H3C4,H3C3,H3C6,H3C8,H3C12,H3C10,H3C2,H4C4,H4C6,H4C12,H4C11,H4C3,H4C8,H4C2,H4C5,H4C13,H3C7,H4-16,H3C13
1_Member	Reactome Gene Sets	R-HSA-194315	Signaling by Rho GTPases	-24.7738	-22.3415	45/707	182,388,1969,3012,3013,3017,8294,8331,8334,8335,8338,8340,8341,8342,8345,8348,8349,8350,8351,8352,8353,8355,8356,8357,8358,8360,8361,8362,8363,8364,8365,8366,8367,8368,8968,8970,10395,23129,26999,64283,90627,94274,121504,121512,653604	JAG1,RHOB,EPHA2,H2AC8,H2AC7,H2BC5,H4C9,H2AC14,H2AC6,H2AC4,H2AC20,H2BC13,H2BC15,H2BC14,H2BC9,H2BC17,H2BC21,H3C1,H3C4,H3C3,H3C6,H3C8,H3C12,H3C10,H3C2,H4C4,H4C6,H4C12,H4C11,H4C3,H4C8,H4C2,H4C5,H4C13,H3C7,H2BC11,DLC1,PLXND1,CYFIP2,ARHGEF28,STARD13,PPP1R14A,H4-16,FGD4,H3C13
1_Member	Reactome Gene Sets	R-HSA-73886	Chromosome Maintenance	-24.7031	-22.2759	25/141	3012,3013,3017,8294,8331,8334,8335,8338,8340,8341,8342,8345,8348,8349,8360,8361,8362,8363,8364,8365,8366,8367,8368,8970,121504	H2AC8,H2AC7,H2BC5,H4C9,H2AC14,H2AC6,H2AC4,H2AC20,H2BC13,H2BC15,H2BC14,H2BC9,H2BC17,H2BC21,H4C4,H4C6,H4C12,H4C11,H4C3,H4C8,H4C2,H4C5,H4C13,H2BC11,H4-16
1_Member	Reactome Gene Sets	R-HSA-2262752	Cellular responses to stress	-24.4913	-22.0691	46/757	1021,1912,2353,3006,3007,3008,3009,3012,3013,3017,3024,4217,8091,8294,8331,8334,8335,8338,8340,8341,8342,8345,8348,8349,8350,8351,8352,8353,8355,8356,8357,8358,8360,8361,8362,8363,8364,8365,8366,8367,8368,8968,8970,8994,121504,653604	CDK6,PHC2,FOS,H1-2,H1-3,H1-4,H1-5,H2AC8,H2AC7,H2BC5,H1-1,MAP3K5,HMGA2,H4C9,H2AC14,H2AC6,H2AC4,H2AC20,H2BC13,H2BC15,H2BC14,H2BC9,H2BC17,H2BC21,H3C1,H3C4,H3C3,H3C6,H3C8,H3C12,H3C10,H3C2,H4C4,H4C6,H4C12,H4C11,H4C3,H4C8,H4C2,H4C5,H4C13,H3C7,H2BC11,LIMD1,H4-16,H3C13
1_Member	Reactome Gene Sets	R-HSA-9716542	Signaling by Rho GTPases, Miro GTPases and RHOBTB3	-24.373	-21.9558	45/723	182,388,1969,3012,3013,3017,8294,8331,8334,8335,8338,8340,8341,8342,8345,8348,8349,8350,8351,8352,8353,8355,8356,8357,8358,8360,8361,8362,8363,8364,8365,8366,8367,8368,8968,8970,10395,23129,26999,64283,90627,94274,121504,121512,653604	JAG1,RHOB,EPHA2,H2AC8,H2AC7,H2BC5,H4C9,H2AC14,H2AC6,H2AC4,H2AC20,H2BC13,H2BC15,H2BC14,H2BC9,H2BC17,H2BC21,H3C1,H3C4,H3C3,H3C6,H3C8,H3C12,H3C10,H3C2,H4C4,H4C6,H4C12,H4C11,H4C3,H4C8,H4C2,H4C5,H4C13,H3C7,H2BC11,DLC1,PLXND1,CYFIP2,ARHGEF28,STARD13,PPP1R14A,H4-16,FGD4,H3C13
1_Member	Reactome Gene Sets	R-HSA-8953897	Cellular responses to stimuli	-24.1581	-21.7458	46/771	1021,1912,2353,3006,3007,3008,3009,3012,3013,3017,3024,4217,8091,8294,8331,8334,8335,8338,8340,8341,8342,8345,8348,8349,8350,8351,8352,8353,8355,8356,8357,8358,8360,8361,8362,8363,8364,8365,8366,8367,8368,8968,8970,8994,121504,653604	CDK6,PHC2,FOS,H1-2,H1-3,H1-4,H1-5,H2AC8,H2AC7,H2BC5,H1-1,MAP3K5,HMGA2,H4C9,H2AC14,H2AC6,H2AC4,H2AC20,H2BC13,H2BC15,H2BC14,H2BC9,H2BC17,H2BC21,H3C1,H3C4,H3C3,H3C6,H3C8,H3C12,H3C10,H3C2,H4C4,H4C6,H4C12,H4C11,H4C3,H4C8,H4C2,H4C5,H4C13,H3C7,H2BC11,LIMD1,H4-16,H3C13
1_Member	Reactome Gene Sets	R-HSA-68886	M Phase	-23.1011	-20.6937	35/418	3012,3013,3017,8294,8331,8334,8335,8338,8340,8341,8342,8345,8348,8349,8350,8351,8352,8353,8355,8356,8357,8358,8360,8361,8362,8363,8364,8365,8366,8367,8368,8968,8970,121504,653604	H2AC8,H2AC7,H2BC5,H4C9,H2AC14,H2AC6,H2AC4,H2AC20,H2BC13,H2BC15,H2BC14,H2BC9,H2BC17,H2BC21,H3C1,H3C4,H3C3,H3C6,H3C8,H3C12,H3C10,H3C2,H4C4,H4C6,H4C12,H4C11,H4C3,H4C8,H4C2,H4C5,H4C13,H3C7,H2BC11,H4-16,H3C13
1_Member	Reactome Gene Sets	R-HSA-5693571	Nonhomologous End-Joining (NHEJ)	-22.8227	-20.42	19/69	3017,8294,8340,8341,8342,8345,8348,8349,8360,8361,8362,8363,8364,8365,8366,8367,8368,8970,121504	H2BC5,H4C9,H2BC13,H2BC15,H2BC14,H2BC9,H2BC17,H2BC21,H4C4,H4C6,H4C12,H4C11,H4C3,H4C8,H4C2,H4C5,H4C13,H2BC11,H4-16
1_Member	Reactome Gene Sets	R-HSA-5693565	Recruitment and ATM-mediated phosphorylation of repair and signaling proteins at DNA double strand breaks	-21.8093	-19.4114	19/77	3017,8294,8340,8341,8342,8345,8348,8349,8360,8361,8362,8363,8364,8365,8366,8367,8368,8970,121504	H2BC5,H4C9,H2BC13,H2BC15,H2BC14,H2BC9,H2BC17,H2BC21,H4C4,H4C6,H4C12,H4C11,H4C3,H4C8,H4C2,H4C5,H4C13,H2BC11,H4-16
1_Member	Reactome Gene Sets	R-HSA-5693606	DNA Double Strand Break Response	-21.6914	-19.2982	19/78	3017,8294,8340,8341,8342,8345,8348,8349,8360,8361,8362,8363,8364,8365,8366,8367,8368,8970,121504	H2BC5,H4C9,H2BC13,H2BC15,H2BC14,H2BC9,H2BC17,H2BC21,H4C4,H4C6,H4C12,H4C11,H4C3,H4C8,H4C2,H4C5,H4C13,H2BC11,H4-16
1_Member	Reactome Gene Sets	R-HSA-69473	G2/M DNA damage checkpoint	-19.9224	-17.5338	19/95	3017,8294,8340,8341,8342,8345,8348,8349,8360,8361,8362,8363,8364,8365,8366,8367,8368,8970,121504	H2BC5,H4C9,H2BC13,H2BC15,H2BC14,H2BC9,H2BC17,H2BC21,H4C4,H4C6,H4C12,H4C11,H4C3,H4C8,H4C2,H4C5,H4C13,H2BC11,H4-16
1_Member	Reactome Gene Sets	R-HSA-69278	Cell Cycle, Mitotic	-19.8744	-17.4904	36/561	1021,3012,3013,3017,8294,8331,8334,8335,8338,8340,8341,8342,8345,8348,8349,8350,8351,8352,8353,8355,8356,8357,8358,8360,8361,8362,8363,8364,8365,8366,8367,8368,8968,8970,121504,653604	CDK6,H2AC8,H2AC7,H2BC5,H4C9,H2AC14,H2AC6,H2AC4,H2AC20,H2BC13,H2BC15,H2BC14,H2BC9,H2BC17,H2BC21,H3C1,H3C4,H3C3,H3C6,H3C8,H3C12,H3C10,H3C2,H4C4,H4C6,H4C12,H4C11,H4C3,H4C8,H4C2,H4C5,H4C13,H3C7,H2BC11,H4-16,H3C13
1_Member	Reactome Gene Sets	R-HSA-5693607	Processing of DNA double-strand break ends	-19.6485	-17.269	19/98	3017,8294,8340,8341,8342,8345,8348,8349,8360,8361,8362,8363,8364,8365,8366,8367,8368,8970,121504	H2BC5,H4C9,H2BC13,H2BC15,H2BC14,H2BC9,H2BC17,H2BC21,H4C4,H4C6,H4C12,H4C11,H4C3,H4C8,H4C2,H4C5,H4C13,H2BC11,H4-16
1_Member	GO Biological Processes	GO:0045653	negative regulation of megakaryocyte differentiation	-18.2051	-15.8477	11/18	8294,8360,8361,8362,8363,8364,8365,8366,8367,8368,121504	H4C9,H4C4,H4C6,H4C12,H4C11,H4C3,H4C8,H4C2,H4C5,H4C13,H4-16
1_Member	GO Biological Processes	GO:0032200	telomere organization	-18.0405	-15.6874	21/159	7012,8294,8350,8351,8352,8353,8355,8356,8357,8358,8360,8361,8362,8363,8364,8365,8366,8367,8368,8968,121504	TERC,H4C9,H3C1,H3C4,H3C3,H3C6,H3C8,H3C12,H3C10,H3C2,H4C4,H4C6,H4C12,H4C11,H4C3,H4C8,H4C2,H4C5,H4C13,H3C7,H4-16
1_Member	Reactome Gene Sets	R-HSA-5693567	HDR through Homologous Recombination (HRR) or Single Strand Annealing (SSA)	-17.0864	-14.7418	19/132	3017,8294,8340,8341,8342,8345,8348,8349,8360,8361,8362,8363,8364,8365,8366,8367,8368,8970,121504	H2BC5,H4C9,H2BC13,H2BC15,H2BC14,H2BC9,H2BC17,H2BC21,H4C4,H4C6,H4C12,H4C11,H4C3,H4C8,H4C2,H4C5,H4C13,H2BC11,H4-16
1_Member	Reactome Gene Sets	R-HSA-1640170	Cell Cycle	-16.9252	-14.5847	36/692	1021,3012,3013,3017,8294,8331,8334,8335,8338,8340,8341,8342,8345,8348,8349,8350,8351,8352,8353,8355,8356,8357,8358,8360,8361,8362,8363,8364,8365,8366,8367,8368,8968,8970,121504,653604	CDK6,H2AC8,H2AC7,H2BC5,H4C9,H2AC14,H2AC6,H2AC4,H2AC20,H2BC13,H2BC15,H2BC14,H2BC9,H2BC17,H2BC21,H3C1,H3C4,H3C3,H3C6,H3C8,H3C12,H3C10,H3C2,H4C4,H4C6,H4C12,H4C11,H4C3,H4C8,H4C2,H4C5,H4C13,H3C7,H2BC11,H4-16,H3C13
1_Member	Reactome Gene Sets	R-HSA-5693538	Homology Directed Repair	-16.713	-14.3766	19/138	3017,8294,8340,8341,8342,8345,8348,8349,8360,8361,8362,8363,8364,8365,8366,8367,8368,8970,121504	H2BC5,H4C9,H2BC13,H2BC15,H2BC14,H2BC9,H2BC17,H2BC21,H4C4,H4C6,H4C12,H4C11,H4C3,H4C8,H4C2,H4C5,H4C13,H2BC11,H4-16
1_Member	KEGG Pathway	ko05203	Viral carcinogenesis	-15.9148	-13.5944	21/201	1021,3017,8294,8340,8341,8342,8345,8348,8349,8360,8361,8362,8363,8364,8365,8366,8367,8368,8970,121504,440689	CDK6,H2BC5,H4C9,H2BC13,H2BC15,H2BC14,H2BC9,H2BC17,H2BC21,H4C4,H4C6,H4C12,H4C11,H4C3,H4C8,H4C2,H4C5,H4C13,H2BC11,H4-16,H2BC18
1_Member	GO Biological Processes	GO:0045652	regulation of megakaryocyte differentiation	-15.7409	-13.4245	12/36	3692,8294,8360,8361,8362,8363,8364,8365,8366,8367,8368,121504	EIF6,H4C9,H4C4,H4C6,H4C12,H4C11,H4C3,H4C8,H4C2,H4C5,H4C13,H4-16
1_Member	KEGG Pathway	hsa05203	Viral carcinogenesis	-15.4827	-13.1702	21/211	1021,3017,8294,8340,8341,8342,8345,8348,8349,8360,8361,8362,8363,8364,8365,8366,8367,8368,8970,121504,440689	CDK6,H2BC5,H4C9,H2BC13,H2BC15,H2BC14,H2BC9,H2BC17,H2BC21,H4C4,H4C6,H4C12,H4C11,H4C3,H4C8,H4C2,H4C5,H4C13,H2BC11,H4-16,H2BC18
1_Member	Reactome Gene Sets	R-HSA-73894	DNA Repair	-15.374	-13.0653	25/335	3012,3013,3017,8294,8331,8334,8335,8338,8340,8341,8342,8345,8348,8349,8360,8361,8362,8363,8364,8365,8366,8367,8368,8970,121504	H2AC8,H2AC7,H2BC5,H4C9,H2AC14,H2AC6,H2AC4,H2AC20,H2BC13,H2BC15,H2BC14,H2BC9,H2BC17,H2BC21,H4C4,H4C6,H4C12,H4C11,H4C3,H4C8,H4C2,H4C5,H4C13,H2BC11,H4-16
1_Member	Reactome Gene Sets	R-HSA-5693532	DNA Double-Strand Break Repair	-15.1356	-12.8308	19/167	3017,8294,8340,8341,8342,8345,8348,8349,8360,8361,8362,8363,8364,8365,8366,8367,8368,8970,121504	H2BC5,H4C9,H2BC13,H2BC15,H2BC14,H2BC9,H2BC17,H2BC21,H4C4,H4C6,H4C12,H4C11,H4C3,H4C8,H4C2,H4C5,H4C13,H2BC11,H4-16
1_Member	Reactome Gene Sets	R-HSA-69481	G2/M Checkpoints	-15.0869	-12.7859	19/168	3017,8294,8340,8341,8342,8345,8348,8349,8360,8361,8362,8363,8364,8365,8366,8367,8368,8970,121504	H2BC5,H4C9,H2BC13,H2BC15,H2BC14,H2BC9,H2BC17,H2BC21,H4C4,H4C6,H4C12,H4C11,H4C3,H4C8,H4C2,H4C5,H4C13,H2BC11,H4-16
1_Member	GO Biological Processes	GO:0030219	megakaryocyte differentiation	-14.5923	-12.295	13/57	3692,8294,8360,8361,8362,8363,8364,8365,8366,8367,8368,10019,121504	EIF6,H4C9,H4C4,H4C6,H4C12,H4C11,H4C3,H4C8,H4C2,H4C5,H4C13,SH2B3,H4-16
1_Member	GO Biological Processes	GO:0006336	DNA replication-independent nucleosome assembly	-14.4718	-12.1783	11/33	8294,8360,8361,8362,8363,8364,8365,8366,8367,8368,121504	H4C9,H4C4,H4C6,H4C12,H4C11,H4C3,H4C8,H4C2,H4C5,H4C13,H4-16
1_Member	GO Biological Processes	GO:0034724	DNA replication-independent nucleosome organization	-14.3054	-12.0156	11/34	8294,8360,8361,8362,8363,8364,8365,8366,8367,8368,121504	H4C9,H4C4,H4C6,H4C12,H4C11,H4C3,H4C8,H4C2,H4C5,H4C13,H4-16
1_Member	WikiPathways	WP4657	22q11.2 copy number variation syndrome	-12.6169	-10.3344	16/145	2303,2637,5649,8216,8294,8360,8361,8362,8363,8364,8365,8366,8367,8368,9076,121504	FOXC2,GBX2,RELN,LZTR1,H4C9,H4C4,H4C6,H4C12,H4C11,H4C3,H4C8,H4C2,H4C5,H4C13,CLDN1,H4-16
1_Member	Reactome Gene Sets	R-HSA-4551638	SUMOylation of chromatin organization proteins	-11.8496	-9.58136	12/71	1912,8294,8360,8361,8362,8363,8364,8365,8366,8367,8368,121504	PHC2,H4C9,H4C4,H4C6,H4C12,H4C11,H4C3,H4C8,H4C2,H4C5,H4C13,H4-16
1_Member	GO Biological Processes	GO:0045637	regulation of myeloid cell differentiation	-11.1337	-8.87238	17/211	182,920,1021,2353,3692,3976,8294,8360,8361,8362,8363,8364,8365,8366,8367,8368,121504	JAG1,CD4,CDK6,FOS,EIF6,LIF,H4C9,H4C4,H4C6,H4C12,H4C11,H4C3,H4C8,H4C2,H4C5,H4C13,H4-16
1_Member	Reactome Gene Sets	R-HSA-69620	Cell Cycle Checkpoints	-10.6957	-8.44116	19/294	3017,8294,8340,8341,8342,8345,8348,8349,8360,8361,8362,8363,8364,8365,8366,8367,8368,8970,121504	H2BC5,H4C9,H2BC13,H2BC15,H2BC14,H2BC9,H2BC17,H2BC21,H4C4,H4C6,H4C12,H4C11,H4C3,H4C8,H4C2,H4C5,H4C13,H2BC11,H4-16
1_Member	GO Biological Processes	GO:0045638	negative regulation of myeloid cell differentiation	-10.5837	-8.33256	12/90	1021,8294,8360,8361,8362,8363,8364,8365,8366,8367,8368,121504	CDK6,H4C9,H4C4,H4C6,H4C12,H4C11,H4C3,H4C8,H4C2,H4C5,H4C13,H4-16
1_Member	GO Biological Processes	GO:0030099	myeloid cell differentiation	-10.4236	-8.17582	21/383	182,920,1021,1969,2353,3692,3976,8294,8360,8361,8362,8363,8364,8365,8366,8367,8368,9991,10019,54790,121504	JAG1,CD4,CDK6,EPHA2,FOS,EIF6,LIF,H4C9,H4C4,H4C6,H4C12,H4C11,H4C3,H4C8,H4C2,H4C5,H4C13,PTBP3,SH2B3,TET2,H4-16
1_Member	GO Biological Processes	GO:1903706	regulation of hemopoiesis	-9.00271	-6.75827	19/370	182,920,1021,2353,3692,3976,8294,8360,8361,8362,8363,8364,8365,8366,8367,8368,10125,84695,121504	JAG1,CD4,CDK6,FOS,EIF6,LIF,H4C9,H4C4,H4C6,H4C12,H4C11,H4C3,H4C8,H4C2,H4C5,H4C13,RASGRP1,LOXL3,H4-16
1_Member	GO Biological Processes	GO:0045596	negative regulation of cell differentiation	-8.60713	-6.366	25/683	182,1021,2301,6657,7042,7474,8294,8360,8361,8362,8363,8364,8365,8366,8367,8368,8994,9355,10468,11173,53335,84695,121504,161742,283659	JAG1,CDK6,FOXE3,SOX2,TGFB2,WNT5A,H4C9,H4C4,H4C6,H4C12,H4C11,H4C3,H4C8,H4C2,H4C5,H4C13,LIMD1,LHX2,FST,ADAMTS7,BCL11A,LOXL3,H4-16,SPRED1,PRTG
1_Member	GO Biological Processes	GO:0006352	DNA-templated transcription, initiation	-7.48533	-5.25716	11/134	8294,8360,8361,8362,8363,8364,8365,8366,8367,8368,121504	H4C9,H4C4,H4C6,H4C12,H4C11,H4C3,H4C8,H4C2,H4C5,H4C13,H4-16
1_Member	Reactome Gene Sets	R-HSA-3108232	SUMO E3 ligases SUMOylate target proteins	-7.05275	-4.84026	12/182	1912,8294,8360,8361,8362,8363,8364,8365,8366,8367,8368,121504	PHC2,H4C9,H4C4,H4C6,H4C12,H4C11,H4C3,H4C8,H4C2,H4C5,H4C13,H4-16
1_Member	Reactome Gene Sets	R-HSA-2990846	SUMOylation	-6.89873	-4.69539	12/188	1912,8294,8360,8361,8362,8363,8364,8365,8366,8367,8368,121504	PHC2,H4C9,H4C4,H4C6,H4C12,H4C11,H4C3,H4C8,H4C2,H4C5,H4C13,H4-16
2_Summary	GO Biological Processes	GO:0045814	negative regulation of gene expression, epigenetic	-19.2799	-16.905	18/86	3006,3007,3008,3009,3012,3013,3024,8329,8330,8332,8334,8335,8336,8338,8969,9355,85235,317772,8091,11240,80312,8331,3017,8340,8341,8342,8345,8348,8349,8970,440689	H1-2,H1-3,H1-4,H1-5,H2AC8,H2AC7,H1-1,H2AC13,H2AC15,H2AC16,H2AC6,H2AC4,H2AC17,H2AC20,H2AC11,LHX2,H2AC12,H2AC21,HMGA2,PADI2,TET1,H2AC14,H2BC5,H2BC13,H2BC15,H2BC14,H2BC9,H2BC17,H2BC21,H2BC11,H2BC18
2_Member	GO Biological Processes	GO:0045814	negative regulation of gene expression, epigenetic	-19.2799	-16.905	18/86	3006,3007,3008,3009,3012,3013,3024,8329,8330,8332,8334,8335,8336,8338,8969,9355,85235,317772	H1-2,H1-3,H1-4,H1-5,H2AC8,H2AC7,H1-1,H2AC13,H2AC15,H2AC16,H2AC6,H2AC4,H2AC17,H2AC20,H2AC11,LHX2,H2AC12,H2AC21
2_Member	GO Biological Processes	GO:0034401	chromatin organization involved in regulation of transcription	-18.8349	-16.4644	20/126	3006,3007,3008,3009,3012,3013,3024,8091,8329,8330,8332,8334,8335,8336,8338,8969,11240,80312,85235,317772	H1-2,H1-3,H1-4,H1-5,H2AC8,H2AC7,H1-1,HMGA2,H2AC13,H2AC15,H2AC16,H2AC6,H2AC4,H2AC17,H2AC20,H2AC11,PADI2,TET1,H2AC12,H2AC21
2_Member	GO Biological Processes	GO:0006342	chromatin silencing	-18.7669	-16.4008	17/76	3006,3007,3008,3009,3012,3013,3024,8329,8330,8332,8334,8335,8336,8338,8969,85235,317772	H1-2,H1-3,H1-4,H1-5,H2AC8,H2AC7,H1-1,H2AC13,H2AC15,H2AC16,H2AC6,H2AC4,H2AC17,H2AC20,H2AC11,H2AC12,H2AC21
2_Member	GO Biological Processes	GO:0097549	chromatin organization involved in negative regulation of transcription	-18.4099	-16.0482	19/113	3006,3007,3008,3009,3012,3013,3024,8091,8329,8330,8332,8334,8335,8336,8338,8969,80312,85235,317772	H1-2,H1-3,H1-4,H1-5,H2AC8,H2AC7,H1-1,HMGA2,H2AC13,H2AC15,H2AC16,H2AC6,H2AC4,H2AC17,H2AC20,H2AC11,TET1,H2AC12,H2AC21
2_Member	Reactome Gene Sets	R-HSA-5689901	Metalloprotease DUBs	-17.3615	-15.0126	13/37	3012,3013,8329,8330,8331,8332,8334,8335,8336,8338,8969,85235,317772	H2AC8,H2AC7,H2AC13,H2AC15,H2AC14,H2AC16,H2AC6,H2AC4,H2AC17,H2AC20,H2AC11,H2AC12,H2AC21
2_Member	GO Biological Processes	GO:0040029	regulation of gene expression, epigenetic	-16.4742	-14.1459	19/142	3006,3007,3008,3009,3012,3013,3024,8329,8330,8332,8334,8335,8336,8338,8969,9355,11240,85235,317772	H1-2,H1-3,H1-4,H1-5,H2AC8,H2AC7,H1-1,H2AC13,H2AC15,H2AC16,H2AC6,H2AC4,H2AC17,H2AC20,H2AC11,LHX2,PADI2,H2AC12,H2AC21
2_Member	Reactome Gene Sets	R-HSA-5689880	Ub-specific processing proteases	-16.2435	-13.9192	22/220	3012,3013,3017,8329,8330,8331,8332,8334,8335,8336,8338,8340,8341,8342,8345,8348,8349,8969,8970,85235,317772,440689	H2AC8,H2AC7,H2BC5,H2AC13,H2AC15,H2AC14,H2AC16,H2AC6,H2AC4,H2AC17,H2AC20,H2BC13,H2BC15,H2BC14,H2BC9,H2BC17,H2BC21,H2AC11,H2BC11,H2AC12,H2AC21,H2BC18
2_Member	Reactome Gene Sets	R-HSA-5688426	Deubiquitination	-13.481	-11.1948	22/298	3012,3013,3017,8329,8330,8331,8332,8334,8335,8336,8338,8340,8341,8342,8345,8348,8349,8969,8970,85235,317772,440689	H2AC8,H2AC7,H2BC5,H2AC13,H2AC15,H2AC14,H2AC16,H2AC6,H2AC4,H2AC17,H2AC20,H2BC13,H2BC15,H2BC14,H2BC9,H2BC17,H2BC21,H2AC11,H2BC11,H2AC12,H2AC21,H2BC18
2_Member	Reactome Gene Sets	R-HSA-5689603	UCH proteinases	-11.1629	-8.89806	13/102	3012,3013,8329,8330,8331,8332,8334,8335,8336,8338,8969,85235,317772	H2AC8,H2AC7,H2AC13,H2AC15,H2AC14,H2AC16,H2AC6,H2AC4,H2AC17,H2AC20,H2AC11,H2AC12,H2AC21
3_Summary	GO Biological Processes	GO:0060968	regulation of gene silencing	-16.6706	-14.3383	16/82	3006,3007,3008,3009,3024,6023,8350,8351,8352,8353,8355,8356,8357,8358,8968,8994,653604,3012,3013,3692,8329,8330,8332,8334,8335,8336,8338,8969,9931,85235,317772,10019,23303,388,493,2149,2151,2776,4842,5552,6383,7042,10125,4094,8091,920,2353,3976,6657	H1-2,H1-3,H1-4,H1-5,H1-1,RMRP,H3C1,H3C4,H3C3,H3C6,H3C8,H3C12,H3C10,H3C2,H3C7,LIMD1,H3C13,H2AC8,H2AC7,EIF6,H2AC13,H2AC15,H2AC16,H2AC6,H2AC4,H2AC17,H2AC20,H2AC11,HELZ,H2AC12,H2AC21,SH2B3,KIF13B,RHOB,ATP2B4,F2R,F2RL2,GNAQ,NOS1,SRGN,SDC2,TGFB2,RASGRP1,MAF,HMGA2,CD4,FOS,LIF,SOX2
3_Member	GO Biological Processes	GO:0060968	regulation of gene silencing	-16.6706	-14.3383	16/82	3006,3007,3008,3009,3024,6023,8350,8351,8352,8353,8355,8356,8357,8358,8968,8994	H1-2,H1-3,H1-4,H1-5,H1-1,RMRP,H3C1,H3C4,H3C3,H3C6,H3C8,H3C12,H3C10,H3C2,H3C7,LIMD1
3_Member	Reactome Gene Sets	R-HSA-1266695	Interleukin-7 signaling	-12.2954	-10.0165	10/36	8350,8351,8352,8353,8355,8356,8357,8358,8968,653604	H3C1,H3C4,H3C3,H3C6,H3C8,H3C12,H3C10,H3C2,H3C7,H3C13
3_Member	WikiPathways	WP4553	FBXL10 enhancement of MAP/ERK signaling in diffuse large B-cell lymphoma	-12.0327	-9.75736	10/38	8350,8351,8352,8353,8355,8356,8357,8358,8968,653604	H3C1,H3C4,H3C3,H3C6,H3C8,H3C12,H3C10,H3C2,H3C7,H3C13
3_Member	WikiPathways	WP4320	Effect of progerin on genes involved in Hutchinson-Gilford progeria syndrome	-11.9074	-9.6356	10/39	8350,8351,8352,8353,8355,8356,8357,8358,8968,653604	H3C1,H3C4,H3C3,H3C6,H3C8,H3C12,H3C10,H3C2,H3C7,H3C13
3_Member	GO Biological Processes	GO:0016458	gene silencing	-10.8075	-8.54956	30/778	3006,3007,3008,3009,3012,3013,3024,3692,6023,8329,8330,8332,8334,8335,8336,8338,8350,8351,8352,8353,8355,8356,8357,8358,8968,8969,8994,9931,85235,317772	H1-2,H1-3,H1-4,H1-5,H2AC8,H2AC7,H1-1,EIF6,RMRP,H2AC13,H2AC15,H2AC16,H2AC6,H2AC4,H2AC17,H2AC20,H3C1,H3C4,H3C3,H3C6,H3C8,H3C12,H3C10,H3C2,H3C7,H2AC11,LIMD1,HELZ,H2AC12,H2AC21
3_Member	Reactome Gene Sets	R-HSA-983231	Factors involved in megakaryocyte development and platelet production	-7.43632	-5.21134	12/168	8350,8351,8352,8353,8355,8356,8357,8358,8968,10019,23303,653604	H3C1,H3C4,H3C3,H3C6,H3C8,H3C12,H3C10,H3C2,H3C7,SH2B3,KIF13B,H3C13
3_Member	Reactome Gene Sets	R-HSA-109582	Hemostasis	-7.37874	-5.15691	22/621	388,493,2149,2151,2776,4842,5552,6383,7042,8350,8351,8352,8353,8355,8356,8357,8358,8968,10019,10125,23303,653604	RHOB,ATP2B4,F2R,F2RL2,GNAQ,NOS1,SRGN,SDC2,TGFB2,H3C1,H3C4,H3C3,H3C6,H3C8,H3C12,H3C10,H3C2,H3C7,SH2B3,RASGRP1,KIF13B,H3C13
3_Member	KEGG Pathway	ko05202	Transcriptional misregulation in cancer	-7.10541	-4.88983	12/180	4094,8091,8350,8351,8352,8353,8355,8356,8357,8358,8968,653604	MAF,HMGA2,H3C1,H3C4,H3C3,H3C6,H3C8,H3C12,H3C10,H3C2,H3C7,H3C13
3_Member	KEGG Pathway	hsa05202	Transcriptional misregulation in cancer	-6.51465	-4.33763	12/204	4094,8091,8350,8351,8352,8353,8355,8356,8357,8358,8968,653604	MAF,HMGA2,H3C1,H3C4,H3C3,H3C6,H3C8,H3C12,H3C10,H3C2,H3C7,H3C13
3_Member	Reactome Gene Sets	R-HSA-449147	Signaling by Interleukins	-4.14961	-2.11012	14/462	920,2353,3976,6657,8350,8351,8352,8353,8355,8356,8357,8358,8968,653604	CD4,FOS,LIF,SOX2,H3C1,H3C4,H3C3,H3C6,H3C8,H3C12,H3C10,H3C2,H3C7,H3C13
3_Member	Reactome Gene Sets	R-HSA-1280215	Cytokine Signaling in Immune system	-2.72675	-0.932063	15/715	920,2353,3976,6657,8350,8351,8352,8353,8355,8356,8357,8358,8968,10019,653604	CD4,FOS,LIF,SOX2,H3C1,H3C4,H3C3,H3C6,H3C8,H3C12,H3C10,H3C2,H3C7,SH2B3,H3C13
4_Summary	Reactome Gene Sets	R-HSA-2559584	Formation of Senescence-Associated Heterochromatin Foci (SAHF)	-8.47543	-6.23757	6/16	3006,3007,3008,3009,3024,8091,11240,6023,80312,3976,4842,27063	H1-2,H1-3,H1-4,H1-5,H1-1,HMGA2,PADI2,RMRP,TET1,LIF,NOS1,ANKRD1
4_Member	Reactome Gene Sets	R-HSA-2559584	Formation of Senescence-Associated Heterochromatin Foci (SAHF)	-8.47543	-6.23757	6/16	3006,3007,3008,3009,3024,8091	H1-2,H1-3,H1-4,H1-5,H1-1,HMGA2
4_Member	Reactome Gene Sets	R-HSA-140342	Apoptosis induced DNA fragmentation	-7.20015	-4.98145	5/13	3006,3007,3008,3009,3024	H1-2,H1-3,H1-4,H1-5,H1-1
4_Member	GO Biological Processes	GO:0031936	negative regulation of chromatin silencing	-7.01141	-4.80503	5/14	3006,3007,3008,3009,3024	H1-2,H1-3,H1-4,H1-5,H1-1
4_Member	GO Biological Processes	GO:0016584	nucleosome positioning	-6.67887	-4.48448	5/16	3006,3007,3008,3009,3024	H1-2,H1-3,H1-4,H1-5,H1-1
4_Member	GO Biological Processes	GO:0045815	positive regulation of gene expression, epigenetic	-6.56018	-4.3774	6/31	3006,3007,3008,3009,3024,11240	H1-2,H1-3,H1-4,H1-5,H1-1,PADI2
4_Member	GO Biological Processes	GO:0031935	regulation of chromatin silencing	-6.39256	-4.22118	5/18	3006,3007,3008,3009,3024	H1-2,H1-3,H1-4,H1-5,H1-1
4_Member	GO Biological Processes	GO:0060969	negative regulation of gene silencing	-6.0087	-3.84289	6/38	3006,3007,3008,3009,3024,6023	H1-2,H1-3,H1-4,H1-5,H1-1,RMRP
4_Member	GO Biological Processes	GO:0030261	chromosome condensation	-5.39292	-3.25414	6/48	3006,3007,3008,3009,3024,8091	H1-2,H1-3,H1-4,H1-5,H1-1,HMGA2
4_Member	GO Biological Processes	GO:1905268	negative regulation of chromatin organization	-4.61931	-2.53635	6/65	3006,3007,3008,3009,3024,80312	H1-2,H1-3,H1-4,H1-5,H1-1,TET1
4_Member	GO Biological Processes	GO:0045910	negative regulation of DNA recombination	-4.32304	-2.26236	5/45	3006,3007,3008,3009,3024	H1-2,H1-3,H1-4,H1-5,H1-1
4_Member	GO Biological Processes	GO:1902275	regulation of chromatin organization	-4.09279	-2.06149	9/201	3006,3007,3008,3009,3024,3976,4842,11240,80312	H1-2,H1-3,H1-4,H1-5,H1-1,LIF,NOS1,PADI2,TET1
4_Member	Reactome Gene Sets	R-HSA-75153	Apoptotic execution phase	-4.01708	-1.99582	5/52	3006,3007,3008,3009,3024	H1-2,H1-3,H1-4,H1-5,H1-1
4_Member	GO Biological Processes	GO:0051053	negative regulation of DNA metabolic process	-3.89371	-1.9104	7/125	3006,3007,3008,3009,3024,8091,27063	H1-2,H1-3,H1-4,H1-5,H1-1,HMGA2,ANKRD1
4_Member	GO Biological Processes	GO:0000018	regulation of DNA recombination	-2.576	-0.82707	5/107	3006,3007,3008,3009,3024	H1-2,H1-3,H1-4,H1-5,H1-1
5_Summary	GO Biological Processes	GO:0048729	tissue morphogenesis	-8.08791	-5.85331	23/618	182,388,1969,2303,2304,2637,3976,6091,6909,7042,7134,7474,8091,8549,9355,10395,10468,10653,23129,27063,57669,59277,90627,3235,3679,3899,6657,10586,55084,53335,57471,3955,4223,56243,80312,130399,10019	JAG1,RHOB,EPHA2,FOXC2,FOXE1,GBX2,LIF,ROBO1,TBX2,TGFB2,TNNC1,WNT5A,HMGA2,LGR5,LHX2,DLC1,FST,SPINT2,PLXND1,ANKRD1,EPB41L5,NTN4,STARD13,HOXD9,ITGA7,AFF3,SOX2,MAB21L2,SOBP,BCL11A,ERMN,LFNG,MEOX2,KIAA1217,TET1,ACVR1C,SH2B3
5_Member	GO Biological Processes	GO:0048729	tissue morphogenesis	-8.08791	-5.85331	23/618	182,388,1969,2303,2304,2637,3976,6091,6909,7042,7134,7474,8091,8549,9355,10395,10468,10653,23129,27063,57669,59277,90627	JAG1,RHOB,EPHA2,FOXC2,FOXE1,GBX2,LIF,ROBO1,TBX2,TGFB2,TNNC1,WNT5A,HMGA2,LGR5,LHX2,DLC1,FST,SPINT2,PLXND1,ANKRD1,EPB41L5,NTN4,STARD13
5_Member	GO Biological Processes	GO:0002009	morphogenesis of an epithelium	-6.78709	-4.58974	19/509	182,388,1969,2303,2304,2637,3976,6909,7042,7474,8549,9355,10395,10468,10653,23129,57669,59277,90627	JAG1,RHOB,EPHA2,FOXC2,FOXE1,GBX2,LIF,TBX2,TGFB2,WNT5A,LGR5,LHX2,DLC1,FST,SPINT2,PLXND1,EPB41L5,NTN4,STARD13
5_Member	GO Biological Processes	GO:0048598	embryonic morphogenesis	-5.1714	-3.06011	18/595	1969,2303,2304,2637,3235,3679,3899,6657,6909,7042,7474,8091,9355,10395,10586,10653,55084,57669	EPHA2,FOXC2,FOXE1,GBX2,HOXD9,ITGA7,AFF3,SOX2,TBX2,TGFB2,WNT5A,HMGA2,LHX2,DLC1,MAB21L2,SPINT2,SOBP,EPB41L5
5_Member	GO Biological Processes	GO:0060562	epithelial tube morphogenesis	-5.06339	-2.95695	13/330	388,1969,2303,2637,6909,7042,7474,8549,9355,10395,10653,23129,90627	RHOB,EPHA2,FOXC2,GBX2,TBX2,TGFB2,WNT5A,LGR5,LHX2,DLC1,SPINT2,PLXND1,STARD13
5_Member	GO Biological Processes	GO:0001763	morphogenesis of a branching structure	-4.15974	-2.11818	9/197	1969,2303,2637,7474,10653,23129,53335,57471,59277	EPHA2,FOXC2,GBX2,WNT5A,SPINT2,PLXND1,BCL11A,ERMN,NTN4
5_Member	GO Biological Processes	GO:0043009	chordate embryonic development	-3.90227	-1.91469	16/613	1969,2303,2637,3235,3955,3976,4223,7042,7474,9355,10395,10653,56243,57669,80312,130399	EPHA2,FOXC2,GBX2,HOXD9,LFNG,LIF,MEOX2,TGFB2,WNT5A,LHX2,DLC1,SPINT2,KIAA1217,EPB41L5,TET1,ACVR1C
5_Member	GO Biological Processes	GO:0009792	embryo development ending in birth or egg hatching	-3.74426	-1.77875	16/633	1969,2303,2637,3235,3955,3976,4223,7042,7474,9355,10395,10653,56243,57669,80312,130399	EPHA2,FOXC2,GBX2,HOXD9,LFNG,LIF,MEOX2,TGFB2,WNT5A,LHX2,DLC1,SPINT2,KIAA1217,EPB41L5,TET1,ACVR1C
5_Member	GO Biological Processes	GO:0048568	embryonic organ development	-3.28637	-1.39742	12/433	1969,2303,2304,2637,3235,3976,6909,7042,7474,10019,10653,55084	EPHA2,FOXC2,FOXE1,GBX2,HOXD9,LIF,TBX2,TGFB2,WNT5A,SH2B3,SPINT2,SOBP
5_Member	GO Biological Processes	GO:0061138	morphogenesis of a branching epithelium	-2.8984	-1.07827	7/183	1969,2303,2637,7474,10653,23129,59277	EPHA2,FOXC2,GBX2,WNT5A,SPINT2,PLXND1,NTN4
5_Member	GO Biological Processes	GO:0001569	branching involved in blood vessel morphogenesis	-2.44036	-0.714138	3/35	2303,2637,23129	FOXC2,GBX2,PLXND1
5_Member	GO Biological Processes	GO:0048562	embryonic organ morphogenesis	-2.35027	-0.641778	8/290	1969,2303,2304,2637,3235,6909,7474,55084	EPHA2,FOXC2,FOXE1,GBX2,HOXD9,TBX2,WNT5A,SOBP
6_Summary	GO Biological Processes	GO:0070848	response to growth factor	-7.50603	-5.27465	24/720	463,493,656,1969,2250,2353,3096,4842,4915,6091,6657,7042,7474,9076,10468,10653,11173,26999,27063,54206,57669,130399,161742,222008,1240,2303,3235,4094,6399,8091,10019,56243	ZFHX3,ATP2B4,BMP8B,EPHA2,FGF5,FOS,HIVEP1,NOS1,NTRK2,ROBO1,SOX2,TGFB2,WNT5A,CLDN1,FST,SPINT2,ADAMTS7,CYFIP2,ANKRD1,ERRFI1,EPB41L5,ACVR1C,SPRED1,VSTM2A,CMKLR1,FOXC2,HOXD9,MAF,TRAPPC2,HMGA2,SH2B3,KIAA1217
6_Member	GO Biological Processes	GO:0070848	response to growth factor	-7.50603	-5.27465	24/720	463,493,656,1969,2250,2353,3096,4842,4915,6091,6657,7042,7474,9076,10468,10653,11173,26999,27063,54206,57669,130399,161742,222008	ZFHX3,ATP2B4,BMP8B,EPHA2,FGF5,FOS,HIVEP1,NOS1,NTRK2,ROBO1,SOX2,TGFB2,WNT5A,CLDN1,FST,SPINT2,ADAMTS7,CYFIP2,ANKRD1,ERRFI1,EPB41L5,ACVR1C,SPRED1,VSTM2A
6_Member	GO Biological Processes	GO:0071363	cellular response to growth factor stimulus	-5.99881	-3.83576	21/689	493,656,2250,2353,3096,4842,4915,6091,7042,7474,9076,10468,10653,11173,26999,27063,54206,57669,130399,161742,222008	ATP2B4,BMP8B,FGF5,FOS,HIVEP1,NOS1,NTRK2,ROBO1,TGFB2,WNT5A,CLDN1,FST,SPINT2,ADAMTS7,CYFIP2,ANKRD1,ERRFI1,EPB41L5,ACVR1C,SPRED1,VSTM2A
6_Member	GO Biological Processes	GO:0071772	response to BMP	-3.9531	-1.95687	8/164	656,3096,7042,7474,10468,10653,11173,222008	BMP8B,HIVEP1,TGFB2,WNT5A,FST,SPINT2,ADAMTS7,VSTM2A
6_Member	GO Biological Processes	GO:0071773	cellular response to BMP stimulus	-3.9531	-1.95687	8/164	656,3096,7042,7474,10468,10653,11173,222008	BMP8B,HIVEP1,TGFB2,WNT5A,FST,SPINT2,ADAMTS7,VSTM2A
6_Member	GO Biological Processes	GO:0001501	skeletal system development	-3.72003	-1.76468	14/508	656,1240,1969,2303,3235,4094,6399,7042,7474,8091,10019,10468,11173,56243	BMP8B,CMKLR1,EPHA2,FOXC2,HOXD9,MAF,TRAPPC2,TGFB2,WNT5A,HMGA2,SH2B3,FST,ADAMTS7,KIAA1217
6_Member	KEGG Pathway	hsa04350	TGF-beta signaling pathway	-2.17876	-0.510783	4/84	656,7042,10468,130399	BMP8B,TGFB2,FST,ACVR1C
6_Member	KEGG Pathway	ko04350	TGF-beta signaling pathway	-2.17876	-0.510783	4/84	656,7042,10468,130399	BMP8B,TGFB2,FST,ACVR1C
7_Summary	GO Biological Processes	GO:0051056	regulation of small GTPase mediated signal transduction	-7.01317	-4.80503	15/303	2149,2151,5649,6091,7042,8216,8477,10125,10395,23108,23607,64283,90627,121512,440730,185,388,2776,23236,1240,5552,161742	F2R,F2RL2,RELN,ROBO1,TGFB2,LZTR1,GPR65,RASGRP1,DLC1,RAP1GAP2,CD2AP,ARHGEF28,STARD13,FGD4,TRIM67,AGTR1,RHOB,GNAQ,PLCB1,CMKLR1,SRGN,SPRED1
7_Member	GO Biological Processes	GO:0051056	regulation of small GTPase mediated signal transduction	-7.01317	-4.80503	15/303	2149,2151,5649,6091,7042,8216,8477,10125,10395,23108,23607,64283,90627,121512,440730	F2R,F2RL2,RELN,ROBO1,TGFB2,LZTR1,GPR65,RASGRP1,DLC1,RAP1GAP2,CD2AP,ARHGEF28,STARD13,FGD4,TRIM67
7_Member	GO Biological Processes	GO:0046578	regulation of Ras protein signal transduction	-5.95065	-3.79402	11/190	2149,2151,6091,7042,8216,8477,10125,10395,64283,90627,440730	F2R,F2RL2,ROBO1,TGFB2,LZTR1,GPR65,RASGRP1,DLC1,ARHGEF28,STARD13,TRIM67
7_Member	GO Biological Processes	GO:0007264	small GTPase mediated signal transduction	-5.54397	-3.39975	17/503	185,388,2149,2151,5649,6091,7042,8216,8477,10125,10395,23108,23607,64283,90627,121512,440730	AGTR1,RHOB,F2R,F2RL2,RELN,ROBO1,TGFB2,LZTR1,GPR65,RASGRP1,DLC1,RAP1GAP2,CD2AP,ARHGEF28,STARD13,FGD4,TRIM67
7_Member	GO Biological Processes	GO:0007266	Rho protein signal transduction	-5.39054	-3.25414	9/138	185,388,2149,2151,6091,8477,10395,64283,90627	AGTR1,RHOB,F2R,F2RL2,ROBO1,GPR65,DLC1,ARHGEF28,STARD13
7_Member	GO Biological Processes	GO:0007265	Ras protein signal transduction	-4.95269	-2.84866	13/338	185,388,2149,2151,6091,7042,8216,8477,10125,10395,64283,90627,440730	AGTR1,RHOB,F2R,F2RL2,ROBO1,TGFB2,LZTR1,GPR65,RASGRP1,DLC1,ARHGEF28,STARD13,TRIM67
7_Member	GO Biological Processes	GO:0035023	regulation of Rho protein signal transduction	-4.90533	-2.80844	7/87	2149,2151,6091,8477,10395,64283,90627	F2R,F2RL2,ROBO1,GPR65,DLC1,ARHGEF28,STARD13
7_Member	GO Biological Processes	GO:0051057	positive regulation of small GTPase mediated signal transduction	-4.36488	-2.29543	6/72	2149,2151,5649,6091,8477,10125	F2R,F2RL2,RELN,ROBO1,GPR65,RASGRP1
7_Member	GO Biological Processes	GO:0035025	positive regulation of Rho protein signal transduction	-3.69987	-1.74809	4/33	2149,2151,6091,8477	F2R,F2RL2,ROBO1,GPR65
7_Member	GO Biological Processes	GO:0051482	positive regulation of cytosolic calcium ion concentration involved in phospholipase C-activating G protein-coupled signaling pathway	-3.64852	-1.70179	4/34	185,2149,2151,8477	AGTR1,F2R,F2RL2,GPR65
7_Member	GO Biological Processes	GO:0046579	positive regulation of Ras protein signal transduction	-3.58708	-1.65025	5/64	2149,2151,6091,8477,10125	F2R,F2RL2,ROBO1,GPR65,RASGRP1
7_Member	Canonical Pathways	M238	PID THROMBIN PAR1 PATHWAY	-3.25052	-1.36881	4/43	2149,2151,2776,23236	F2R,F2RL2,GNAQ,PLCB1
7_Member	GO Biological Processes	GO:0007200	phospholipase C-activating G protein-coupled receptor signaling pathway	-2.62969	-0.863481	5/104	185,1240,2149,2151,8477	AGTR1,CMKLR1,F2R,F2RL2,GPR65
7_Member	Reactome Gene Sets	R-HSA-456926	Thrombin signalling through proteinase activated receptors (PARs)	-2.55233	-0.807625	3/32	2149,2151,2776	F2R,F2RL2,GNAQ
7_Member	Reactome Gene Sets	R-HSA-416476	G alpha (q) signalling events	-2.49256	-0.758222	7/216	185,2149,2151,2776,8477,10125,23236	AGTR1,F2R,F2RL2,GNAQ,GPR65,RASGRP1,PLCB1
7_Member	Reactome Gene Sets	R-HSA-76002	Platelet activation, signaling and aggregation	-2.03647	-0.411167	7/263	388,2149,2151,2776,5552,7042,10125	RHOB,F2R,F2RL2,GNAQ,SRGN,TGFB2,RASGRP1
7_Member	WikiPathways	WP2038	Microtubule cytoskeleton regulation	-2.0302	-0.409647	3/49	2151,2776,161742	F2RL2,GNAQ,SPRED1
8_Summary	GO Biological Processes	GO:0007423	sensory organ development	-6.87119	-4.67085	20/555	182,493,1826,1969,2301,2303,2637,4094,4915,5158,5205,6657,6909,7042,7474,8549,9355,10586,55084,161742	JAG1,ATP2B4,DSCAM,EPHA2,FOXE3,FOXC2,GBX2,MAF,NTRK2,PDE6B,ATP8B1,SOX2,TBX2,TGFB2,WNT5A,LGR5,LHX2,MAB21L2,SOBP,SPRED1
8_Member	GO Biological Processes	GO:0007423	sensory organ development	-6.87119	-4.67085	20/555	182,493,1826,1969,2301,2303,2637,4094,4915,5158,5205,6657,6909,7042,7474,8549,9355,10586,55084,161742	JAG1,ATP2B4,DSCAM,EPHA2,FOXE3,FOXC2,GBX2,MAF,NTRK2,PDE6B,ATP8B1,SOX2,TBX2,TGFB2,WNT5A,LGR5,LHX2,MAB21L2,SOBP,SPRED1
8_Member	GO Biological Processes	GO:0043010	camera-type eye development	-6.65507	-4.46363	15/323	182,493,1826,1969,2301,2303,4094,4915,5158,6909,7042,7474,9355,10586,161742	JAG1,ATP2B4,DSCAM,EPHA2,FOXE3,FOXC2,MAF,NTRK2,PDE6B,TBX2,TGFB2,WNT5A,LHX2,MAB21L2,SPRED1
8_Member	GO Biological Processes	GO:0001654	eye development	-6.61095	-4.42243	16/372	182,493,1826,1969,2301,2303,4094,4915,5158,6657,6909,7042,7474,9355,10586,161742	JAG1,ATP2B4,DSCAM,EPHA2,FOXE3,FOXC2,MAF,NTRK2,PDE6B,SOX2,TBX2,TGFB2,WNT5A,LHX2,MAB21L2,SPRED1
8_Member	GO Biological Processes	GO:0150063	visual system development	-6.5487	-4.36883	16/376	182,493,1826,1969,2301,2303,4094,4915,5158,6657,6909,7042,7474,9355,10586,161742	JAG1,ATP2B4,DSCAM,EPHA2,FOXE3,FOXC2,MAF,NTRK2,PDE6B,SOX2,TBX2,TGFB2,WNT5A,LHX2,MAB21L2,SPRED1
8_Member	GO Biological Processes	GO:0048880	sensory system development	-6.45684	-4.28265	16/382	182,493,1826,1969,2301,2303,4094,4915,5158,6657,6909,7042,7474,9355,10586,161742	JAG1,ATP2B4,DSCAM,EPHA2,FOXE3,FOXC2,MAF,NTRK2,PDE6B,SOX2,TBX2,TGFB2,WNT5A,LHX2,MAB21L2,SPRED1
8_Member	GO Biological Processes	GO:0048593	camera-type eye morphogenesis	-3.98212	-1.97452	7/121	182,1826,1969,2301,4915,6909,7474	JAG1,DSCAM,EPHA2,FOXE3,NTRK2,TBX2,WNT5A
8_Member	GO Biological Processes	GO:0048592	eye morphogenesis	-3.37314	-1.46903	7/152	182,1826,1969,2301,4915,6909,7474	JAG1,DSCAM,EPHA2,FOXE3,NTRK2,TBX2,WNT5A
8_Member	GO Biological Processes	GO:0090596	sensory organ morphogenesis	-3.29969	-1.40485	9/257	182,1826,1969,2301,2637,4915,6909,7474,55084	JAG1,DSCAM,EPHA2,FOXE3,GBX2,NTRK2,TBX2,WNT5A,SOBP
8_Member	GO Biological Processes	GO:0060041	retina development in camera-type eye	-2.68059	-0.899806	6/148	493,1826,4915,5158,7042,9355	ATP2B4,DSCAM,NTRK2,PDE6B,TGFB2,LHX2
8_Member	GO Biological Processes	GO:0003407	neural retina development	-2.46028	-0.731031	4/70	493,1826,4915,7042	ATP2B4,DSCAM,NTRK2,TGFB2
9_Summary	GO Biological Processes	GO:0030155	regulation of cell adhesion	-6.56014	-4.3774	23/751	182,463,920,1021,1826,1947,1969,2303,3485,3976,6657,7042,7474,9595,10019,10125,10395,10653,23129,54566,57091,57669,84695	JAG1,ZFHX3,CD4,CDK6,DSCAM,EFNB1,EPHA2,FOXC2,IGFBP2,LIF,SOX2,TGFB2,WNT5A,CYTIP,SH2B3,RASGRP1,DLC1,SPINT2,PLXND1,EPB41L4B,CASS4,EPB41L5,LOXL3
9_Member	GO Biological Processes	GO:0030155	regulation of cell adhesion	-6.56014	-4.3774	23/751	182,463,920,1021,1826,1947,1969,2303,3485,3976,6657,7042,7474,9595,10019,10125,10395,10653,23129,54566,57091,57669,84695	JAG1,ZFHX3,CD4,CDK6,DSCAM,EFNB1,EPHA2,FOXC2,IGFBP2,LIF,SOX2,TGFB2,WNT5A,CYTIP,SH2B3,RASGRP1,DLC1,SPINT2,PLXND1,EPB41L4B,CASS4,EPB41L5,LOXL3
9_Member	GO Biological Processes	GO:0045785	positive regulation of cell adhesion	-4.40832	-2.33664	14/437	463,920,1021,1947,2303,3485,3976,6657,7042,7474,10125,54566,57091,57669	ZFHX3,CD4,CDK6,EFNB1,FOXC2,IGFBP2,LIF,SOX2,TGFB2,WNT5A,RASGRP1,EPB41L4B,CASS4,EPB41L5
9_Member	GO Biological Processes	GO:0022407	regulation of cell-cell adhesion	-2.6263	-0.863381	11/450	182,920,1947,3485,6657,7474,10019,10125,10653,57669,84695	JAG1,CD4,EFNB1,IGFBP2,SOX2,WNT5A,SH2B3,RASGRP1,SPINT2,EPB41L5,LOXL3
9_Member	GO Biological Processes	GO:0007162	negative regulation of cell adhesion	-2.23814	-0.554954	8/303	182,1826,10019,10395,10653,23129,57669,84695	JAG1,DSCAM,SH2B3,DLC1,SPINT2,PLXND1,EPB41L5,LOXL3
10_Summary	Reactome Gene Sets	R-HSA-8866654	E3 ubiquitin ligases ubiquitinate target proteins	-6.04781	-3.87923	7/59	3017,8340,8341,8342,8345,8348,8970,3008,8351,64782	H2BC5,H2BC13,H2BC15,H2BC14,H2BC9,H2BC17,H2BC11,H1-4,H3C4,AEN
10_Member	Reactome Gene Sets	R-HSA-8866654	E3 ubiquitin ligases ubiquitinate target proteins	-6.04781	-3.87923	7/59	3017,8340,8341,8342,8345,8348,8970	H2BC5,H2BC13,H2BC15,H2BC14,H2BC9,H2BC17,H2BC11
10_Member	Reactome Gene Sets	R-HSA-8852135	Protein ubiquitination	-5.18374	-3.07001	7/79	3017,8340,8341,8342,8345,8348,8970	H2BC5,H2BC13,H2BC15,H2BC14,H2BC9,H2BC17,H2BC11
10_Member	WikiPathways	WP4286	Genotoxicity pathway	-3.61929	-1.67588	5/63	3008,8341,8342,8351,64782	H1-4,H2BC15,H2BC14,H3C4,AEN
11_Summary	GO Biological Processes	GO:0048514	blood vessel morphogenesis	-5.95884	-3.79853	21/693	182,185,388,493,1969,2303,2637,4223,4915,6091,6909,7042,7474,8091,23129,23670,57125,90627,161198,161742,255324,1947,54566,57669,130399,10395,10653,11240,23236	JAG1,AGTR1,RHOB,ATP2B4,EPHA2,FOXC2,GBX2,MEOX2,NTRK2,ROBO1,TBX2,TGFB2,WNT5A,HMGA2,PLXND1,CEMIP2,PLXDC1,STARD13,CLEC14A,SPRED1,EPGN,EFNB1,EPB41L4B,EPB41L5,ACVR1C,DLC1,SPINT2,PADI2,PLCB1
11_Member	GO Biological Processes	GO:0048514	blood vessel morphogenesis	-5.95884	-3.79853	21/693	182,185,388,493,1969,2303,2637,4223,4915,6091,6909,7042,7474,8091,23129,23670,57125,90627,161198,161742,255324	JAG1,AGTR1,RHOB,ATP2B4,EPHA2,FOXC2,GBX2,MEOX2,NTRK2,ROBO1,TBX2,TGFB2,WNT5A,HMGA2,PLXND1,CEMIP2,PLXDC1,STARD13,CLEC14A,SPRED1,EPGN
11_Member	GO Biological Processes	GO:0001667	ameboidal-type cell migration	-5.84164	-3.68944	17/478	388,493,1947,1969,2303,2637,4223,6091,7042,7474,23129,54566,57669,90627,130399,161198,161742	RHOB,ATP2B4,EFNB1,EPHA2,FOXC2,GBX2,MEOX2,ROBO1,TGFB2,WNT5A,PLXND1,EPB41L4B,EPB41L5,STARD13,ACVR1C,CLEC14A,SPRED1
11_Member	GO Biological Processes	GO:0001525	angiogenesis	-5.71681	-3.56729	19/600	182,185,388,493,1969,2303,2637,4223,6091,7042,7474,8091,23129,23670,57125,90627,161198,161742,255324	JAG1,AGTR1,RHOB,ATP2B4,EPHA2,FOXC2,GBX2,MEOX2,ROBO1,TGFB2,WNT5A,HMGA2,PLXND1,CEMIP2,PLXDC1,STARD13,CLEC14A,SPRED1,EPGN
11_Member	GO Biological Processes	GO:0010631	epithelial cell migration	-5.35982	-3.22856	14/359	388,493,1969,2303,4223,6091,7042,7474,23129,54566,57669,90627,161198,161742	RHOB,ATP2B4,EPHA2,FOXC2,MEOX2,ROBO1,TGFB2,WNT5A,PLXND1,EPB41L4B,EPB41L5,STARD13,CLEC14A,SPRED1
11_Member	GO Biological Processes	GO:0090132	epithelium migration	-5.31845	-3.19227	14/362	388,493,1969,2303,4223,6091,7042,7474,23129,54566,57669,90627,161198,161742	RHOB,ATP2B4,EPHA2,FOXC2,MEOX2,ROBO1,TGFB2,WNT5A,PLXND1,EPB41L4B,EPB41L5,STARD13,CLEC14A,SPRED1
11_Member	GO Biological Processes	GO:0090130	tissue migration	-5.25045	-3.12929	14/367	388,493,1969,2303,4223,6091,7042,7474,23129,54566,57669,90627,161198,161742	RHOB,ATP2B4,EPHA2,FOXC2,MEOX2,ROBO1,TGFB2,WNT5A,PLXND1,EPB41L4B,EPB41L5,STARD13,CLEC14A,SPRED1
11_Member	GO Biological Processes	GO:0001568	blood vessel development	-5.23793	-3.11926	21/771	182,185,388,493,1969,2303,2637,4223,4915,6091,6909,7042,7474,8091,23129,23670,57125,90627,161198,161742,255324	JAG1,AGTR1,RHOB,ATP2B4,EPHA2,FOXC2,GBX2,MEOX2,NTRK2,ROBO1,TBX2,TGFB2,WNT5A,HMGA2,PLXND1,CEMIP2,PLXDC1,STARD13,CLEC14A,SPRED1,EPGN
11_Member	GO Biological Processes	GO:0043542	endothelial cell migration	-4.34459	-2.28159	11/281	388,493,1969,2303,4223,6091,7474,23129,90627,161198,161742	RHOB,ATP2B4,EPHA2,FOXC2,MEOX2,ROBO1,WNT5A,PLXND1,STARD13,CLEC14A,SPRED1
11_Member	GO Biological Processes	GO:0002040	sprouting angiogenesis	-4.31664	-2.26028	9/188	185,1969,2303,4223,6091,23670,90627,161198,161742	AGTR1,EPHA2,FOXC2,MEOX2,ROBO1,CEMIP2,STARD13,CLEC14A,SPRED1
11_Member	GO Biological Processes	GO:0040013	negative regulation of locomotion	-4.30663	-2.25241	13/390	182,388,493,4223,6091,7474,10395,10653,11240,23236,90627,130399,161742	JAG1,RHOB,ATP2B4,MEOX2,ROBO1,WNT5A,DLC1,SPINT2,PADI2,PLCB1,STARD13,ACVR1C,SPRED1
11_Member	GO Biological Processes	GO:0010632	regulation of epithelial cell migration	-4.18144	-2.1357	11/293	388,493,1969,2303,4223,7042,7474,54566,57669,90627,161742	RHOB,ATP2B4,EPHA2,FOXC2,MEOX2,TGFB2,WNT5A,EPB41L4B,EPB41L5,STARD13,SPRED1
11_Member	GO Biological Processes	GO:2000146	negative regulation of cell motility	-4.04011	-2.01686	12/358	182,388,493,4223,6091,10395,10653,11240,23236,90627,130399,161742	JAG1,RHOB,ATP2B4,MEOX2,ROBO1,DLC1,SPINT2,PADI2,PLCB1,STARD13,ACVR1C,SPRED1
11_Member	GO Biological Processes	GO:0051271	negative regulation of cellular component movement	-3.95003	-1.95568	12/366	182,388,493,4223,6091,10395,10653,11240,23236,90627,130399,161742	JAG1,RHOB,ATP2B4,MEOX2,ROBO1,DLC1,SPINT2,PADI2,PLCB1,STARD13,ACVR1C,SPRED1
11_Member	GO Biological Processes	GO:0043534	blood vessel endothelial cell migration	-3.72505	-1.76468	8/177	493,1969,2303,4223,6091,90627,161198,161742	ATP2B4,EPHA2,FOXC2,MEOX2,ROBO1,STARD13,CLEC14A,SPRED1
11_Member	GO Biological Processes	GO:0002042	cell migration involved in sprouting angiogenesis	-3.71815	-1.76468	6/94	2303,4223,6091,90627,161198,161742	FOXC2,MEOX2,ROBO1,STARD13,CLEC14A,SPRED1
11_Member	GO Biological Processes	GO:0030336	negative regulation of cell migration	-3.58382	-1.64863	11/343	182,388,493,4223,6091,10395,11240,23236,90627,130399,161742	JAG1,RHOB,ATP2B4,MEOX2,ROBO1,DLC1,PADI2,PLCB1,STARD13,ACVR1C,SPRED1
11_Member	GO Biological Processes	GO:0045765	regulation of angiogenesis	-2.96177	-1.11858	10/346	388,493,1969,2303,7042,7474,8091,23129,23670,161742	RHOB,ATP2B4,EPHA2,FOXC2,TGFB2,WNT5A,HMGA2,PLXND1,CEMIP2,SPRED1
11_Member	GO Biological Processes	GO:0010594	regulation of endothelial cell migration	-2.93596	-1.10059	8/233	388,493,1969,2303,4223,7474,90627,161742	RHOB,ATP2B4,EPHA2,FOXC2,MEOX2,WNT5A,STARD13,SPRED1
11_Member	GO Biological Processes	GO:1901342	regulation of vasculature development	-2.90599	-1.08461	10/352	388,493,1969,2303,7042,7474,8091,23129,23670,161742	RHOB,ATP2B4,EPHA2,FOXC2,TGFB2,WNT5A,HMGA2,PLXND1,CEMIP2,SPRED1
11_Member	GO Biological Processes	GO:0043535	regulation of blood vessel endothelial cell migration	-2.62255	-0.860721	6/152	493,1969,2303,4223,90627,161742	ATP2B4,EPHA2,FOXC2,MEOX2,STARD13,SPRED1
11_Member	GO Biological Processes	GO:0043537	negative regulation of blood vessel endothelial cell migration	-2.29215	-0.596023	4/78	493,4223,90627,161742	ATP2B4,MEOX2,STARD13,SPRED1
11_Member	GO Biological Processes	GO:0090049	regulation of cell migration involved in sprouting angiogenesis	-2.29215	-0.596023	4/78	2303,4223,90627,161742	FOXC2,MEOX2,STARD13,SPRED1
11_Member	GO Biological Processes	GO:0090051	negative regulation of cell migration involved in sprouting angiogenesis	-2.21602	-0.5404	3/42	4223,90627,161742	MEOX2,STARD13,SPRED1
12_Summary	GO Biological Processes	GO:0000904	cell morphogenesis involved in differentiation	-5.9489	-3.79402	21/694	1826,1947,1969,2637,4747,4884,4915,5649,6091,6383,7474,9355,10653,11178,23129,23303,51393,56956,57091,57669,59277,26999,53335,112,27063,440730,5205,57471,3976,23266,26045,283659,493,1021,23236,6657,10395,463,11240,57502,57526,185,1240,7042,388,64283	DSCAM,EFNB1,EPHA2,GBX2,NEFL,NPTX1,NTRK2,RELN,ROBO1,SDC2,WNT5A,LHX2,SPINT2,LZTS1,PLXND1,KIF13B,TRPV2,LHX9,CASS4,EPB41L5,NTN4,CYFIP2,BCL11A,ADCY6,ANKRD1,TRIM67,ATP8B1,ERMN,LIF,ADGRL2,LRRTM2,PRTG,ATP2B4,CDK6,PLCB1,SOX2,DLC1,ZFHX3,PADI2,NLGN4X,PCDH19,AGTR1,CMKLR1,TGFB2,RHOB,ARHGEF28
12_Member	GO Biological Processes	GO:0000904	cell morphogenesis involved in differentiation	-5.9489	-3.79402	21/694	1826,1947,1969,2637,4747,4884,4915,5649,6091,6383,7474,9355,10653,11178,23129,23303,51393,56956,57091,57669,59277	DSCAM,EFNB1,EPHA2,GBX2,NEFL,NPTX1,NTRK2,RELN,ROBO1,SDC2,WNT5A,LHX2,SPINT2,LZTS1,PLXND1,KIF13B,TRPV2,LHX9,CASS4,EPB41L5,NTN4
12_Member	GO Biological Processes	GO:0048812	neuron projection morphogenesis	-5.57124	-3.42438	19/614	1826,1947,1969,2637,4747,4884,4915,5649,6091,6383,7474,9355,11178,23129,23303,26999,51393,53335,56956	DSCAM,EFNB1,EPHA2,GBX2,NEFL,NPTX1,NTRK2,RELN,ROBO1,SDC2,WNT5A,LHX2,LZTS1,PLXND1,KIF13B,CYFIP2,TRPV2,BCL11A,LHX9
12_Member	GO Biological Processes	GO:0120039	plasma membrane bounded cell projection morphogenesis	-5.42018	-3.27857	19/629	1826,1947,1969,2637,4747,4884,4915,5649,6091,6383,7474,9355,11178,23129,23303,26999,51393,53335,56956	DSCAM,EFNB1,EPHA2,GBX2,NEFL,NPTX1,NTRK2,RELN,ROBO1,SDC2,WNT5A,LHX2,LZTS1,PLXND1,KIF13B,CYFIP2,TRPV2,BCL11A,LHX9
12_Member	GO Biological Processes	GO:0048858	cell projection morphogenesis	-5.38072	-3.24689	19/633	1826,1947,1969,2637,4747,4884,4915,5649,6091,6383,7474,9355,11178,23129,23303,26999,51393,53335,56956	DSCAM,EFNB1,EPHA2,GBX2,NEFL,NPTX1,NTRK2,RELN,ROBO1,SDC2,WNT5A,LHX2,LZTS1,PLXND1,KIF13B,CYFIP2,TRPV2,BCL11A,LHX9
12_Member	GO Biological Processes	GO:0007409	axonogenesis	-5.26496	-3.14129	15/418	1826,1947,1969,2637,4747,4884,4915,5649,6091,7474,9355,23129,23303,51393,56956	DSCAM,EFNB1,EPHA2,GBX2,NEFL,NPTX1,NTRK2,RELN,ROBO1,WNT5A,LHX2,PLXND1,KIF13B,TRPV2,LHX9
12_Member	GO Biological Processes	GO:0032990	cell part morphogenesis	-5.20729	-3.09109	19/651	1826,1947,1969,2637,4747,4884,4915,5649,6091,6383,7474,9355,11178,23129,23303,26999,51393,53335,56956	DSCAM,EFNB1,EPHA2,GBX2,NEFL,NPTX1,NTRK2,RELN,ROBO1,SDC2,WNT5A,LHX2,LZTS1,PLXND1,KIF13B,CYFIP2,TRPV2,BCL11A,LHX9
12_Member	GO Biological Processes	GO:0048667	cell morphogenesis involved in neuron differentiation	-5.09579	-2.98694	17/544	1826,1947,1969,2637,4747,4884,4915,5649,6091,6383,7474,9355,11178,23129,23303,51393,56956	DSCAM,EFNB1,EPHA2,GBX2,NEFL,NPTX1,NTRK2,RELN,ROBO1,SDC2,WNT5A,LHX2,LZTS1,PLXND1,KIF13B,TRPV2,LHX9
12_Member	GO Biological Processes	GO:0010975	regulation of neuron projection development	-4.94201	-2.84037	15/445	112,1826,4747,4915,5649,6091,6383,7474,11178,23129,23303,27063,51393,53335,440730	ADCY6,DSCAM,NEFL,NTRK2,RELN,ROBO1,SDC2,WNT5A,LZTS1,PLXND1,KIF13B,ANKRD1,TRPV2,BCL11A,TRIM67
12_Member	GO Biological Processes	GO:0032989	cellular component morphogenesis	-4.93852	-2.83926	20/743	1826,1947,1969,2637,4747,4884,4915,5649,6091,6383,7474,9355,11178,23129,23303,26999,27063,51393,53335,56956	DSCAM,EFNB1,EPHA2,GBX2,NEFL,NPTX1,NTRK2,RELN,ROBO1,SDC2,WNT5A,LHX2,LZTS1,PLXND1,KIF13B,CYFIP2,ANKRD1,TRPV2,BCL11A,LHX9
12_Member	GO Biological Processes	GO:0061564	axon development	-4.69732	-2.60977	15/467	1826,1947,1969,2637,4747,4884,4915,5649,6091,7474,9355,23129,23303,51393,56956	DSCAM,EFNB1,EPHA2,GBX2,NEFL,NPTX1,NTRK2,RELN,ROBO1,WNT5A,LHX2,PLXND1,KIF13B,TRPV2,LHX9
12_Member	GO Biological Processes	GO:0031344	regulation of cell projection organization	-4.46052	-2.38212	18/673	112,1826,1969,4747,4915,5205,5649,6091,6383,7474,11178,23129,23303,27063,51393,53335,57471,440730	ADCY6,DSCAM,EPHA2,NEFL,NTRK2,ATP8B1,RELN,ROBO1,SDC2,WNT5A,LZTS1,PLXND1,KIF13B,ANKRD1,TRPV2,BCL11A,ERMN,TRIM67
12_Member	GO Biological Processes	GO:0007411	axon guidance	-4.42714	-2.35099	10/227	1826,1947,1969,2637,5649,6091,7474,9355,23129,56956	DSCAM,EFNB1,EPHA2,GBX2,RELN,ROBO1,WNT5A,LHX2,PLXND1,LHX9
12_Member	GO Biological Processes	GO:0097485	neuron projection guidance	-4.411	-2.33709	10/228	1826,1947,1969,2637,5649,6091,7474,9355,23129,56956	DSCAM,EFNB1,EPHA2,GBX2,RELN,ROBO1,WNT5A,LHX2,PLXND1,LHX9
12_Member	GO Biological Processes	GO:0051960	regulation of nervous system development	-4.34445	-2.28159	14/443	1826,2637,3976,4747,4915,5649,6091,7474,9355,23129,23266,26045,51393,283659	DSCAM,GBX2,LIF,NEFL,NTRK2,RELN,ROBO1,WNT5A,LHX2,PLXND1,ADGRL2,LRRTM2,TRPV2,PRTG
12_Member	GO Biological Processes	GO:0050770	regulation of axonogenesis	-4.14385	-2.10643	8/154	1826,4747,4915,6091,7474,23129,23303,51393	DSCAM,NEFL,NTRK2,ROBO1,WNT5A,PLXND1,KIF13B,TRPV2
12_Member	GO Biological Processes	GO:0050772	positive regulation of axonogenesis	-4.13705	-2.10168	6/79	1826,4747,4915,6091,23129,51393	DSCAM,NEFL,NTRK2,ROBO1,PLXND1,TRPV2
12_Member	GO Biological Processes	GO:0120035	regulation of plasma membrane bounded cell projection organization	-4.08329	-2.05402	17/655	112,1826,1969,4747,4915,5205,5649,6091,6383,7474,11178,23129,23303,27063,51393,53335,440730	ADCY6,DSCAM,EPHA2,NEFL,NTRK2,ATP8B1,RELN,ROBO1,SDC2,WNT5A,LZTS1,PLXND1,KIF13B,ANKRD1,TRPV2,BCL11A,TRIM67
12_Member	GO Biological Processes	GO:0021543	pallium development	-3.84522	-1.86553	8/170	493,1021,4747,4915,5649,6091,9355,23236	ATP2B4,CDK6,NEFL,NTRK2,RELN,ROBO1,LHX2,PLCB1
12_Member	GO Biological Processes	GO:0030900	forebrain development	-3.78793	-1.81361	12/381	493,1021,2637,4747,4915,5649,6091,6657,7474,9355,10395,23236	ATP2B4,CDK6,GBX2,NEFL,NTRK2,RELN,ROBO1,SOX2,WNT5A,LHX2,DLC1,PLCB1
12_Member	GO Biological Processes	GO:0051962	positive regulation of nervous system development	-3.77696	-1.80442	10/272	1826,3976,4747,4915,5649,6091,23129,23266,26045,51393	DSCAM,LIF,NEFL,NTRK2,RELN,ROBO1,PLXND1,ADGRL2,LRRTM2,TRPV2
12_Member	GO Biological Processes	GO:0060284	regulation of cell development	-3.77296	-1.80218	14/502	1826,3976,4747,4915,5649,6091,7474,9355,23129,23236,51393,53335,57091,283659	DSCAM,LIF,NEFL,NTRK2,RELN,ROBO1,WNT5A,LHX2,PLXND1,PLCB1,TRPV2,BCL11A,CASS4,PRTG
12_Member	GO Biological Processes	GO:0007420	brain development	-3.37459	-1.46903	17/753	463,493,1021,2637,4747,4915,5649,6091,6657,7474,9355,10395,11240,23236,23266,57502,57526	ZFHX3,ATP2B4,CDK6,GBX2,NEFL,NTRK2,RELN,ROBO1,SOX2,WNT5A,LHX2,DLC1,PADI2,PLCB1,ADGRL2,NLGN4X,PCDH19
12_Member	GO Biological Processes	GO:0021537	telencephalon development	-3.37373	-1.46903	9/251	493,1021,4747,4915,5649,6091,7474,9355,23236	ATP2B4,CDK6,NEFL,NTRK2,RELN,ROBO1,WNT5A,LHX2,PLCB1
12_Member	GO Biological Processes	GO:0050767	regulation of neurogenesis	-3.36596	-1.46365	11/364	1826,3976,4747,4915,5649,6091,7474,9355,23129,51393,283659	DSCAM,LIF,NEFL,NTRK2,RELN,ROBO1,WNT5A,LHX2,PLXND1,TRPV2,PRTG
12_Member	GO Biological Processes	GO:0021987	cerebral cortex development	-3.24642	-1.36616	6/115	4747,4915,5649,6091,9355,23236	NEFL,NTRK2,RELN,ROBO1,LHX2,PLCB1
12_Member	GO Biological Processes	GO:0060322	head development	-3.10609	-1.23434	17/796	463,493,1021,2637,4747,4915,5649,6091,6657,7474,9355,10395,11240,23236,23266,57502,57526	ZFHX3,ATP2B4,CDK6,GBX2,NEFL,NTRK2,RELN,ROBO1,SOX2,WNT5A,LHX2,DLC1,PADI2,PLCB1,ADGRL2,NLGN4X,PCDH19
12_Member	GO Biological Processes	GO:0050769	positive regulation of neurogenesis	-3.03317	-1.17817	8/225	1826,3976,4747,4915,5649,6091,23129,51393	DSCAM,LIF,NEFL,NTRK2,RELN,ROBO1,PLXND1,TRPV2
12_Member	GO Biological Processes	GO:0006935	chemotaxis	-2.95841	-1.11652	14/607	185,1240,1826,1947,1969,2637,5649,6091,7042,7474,9355,11240,23129,56956	AGTR1,CMKLR1,DSCAM,EFNB1,EPHA2,GBX2,RELN,ROBO1,TGFB2,WNT5A,LHX2,PADI2,PLXND1,LHX9
12_Member	GO Biological Processes	GO:0042330	taxis	-2.9382	-1.10154	14/610	185,1240,1826,1947,1969,2637,5649,6091,7042,7474,9355,11240,23129,56956	AGTR1,CMKLR1,DSCAM,EFNB1,EPHA2,GBX2,RELN,ROBO1,TGFB2,WNT5A,LHX2,PADI2,PLXND1,LHX9
12_Member	GO Biological Processes	GO:0031346	positive regulation of cell projection organization	-2.89681	-1.07793	10/353	1826,4747,4915,5649,6091,7474,23129,27063,51393,440730	DSCAM,NEFL,NTRK2,RELN,ROBO1,WNT5A,PLXND1,ANKRD1,TRPV2,TRIM67
12_Member	GO Biological Processes	GO:0010720	positive regulation of cell development	-2.84748	-1.03844	9/298	1826,3976,4747,4915,5649,6091,23129,51393,57091	DSCAM,LIF,NEFL,NTRK2,RELN,ROBO1,PLXND1,TRPV2,CASS4
12_Member	Reactome Gene Sets	R-HSA-422475	Axon guidance	-2.40402	-0.687733	12/552	388,1826,1947,1969,5649,6091,6383,9355,23129,56956,59277,64283	RHOB,DSCAM,EFNB1,EPHA2,RELN,ROBO1,SDC2,LHX2,PLXND1,LHX9,NTN4,ARHGEF28
12_Member	Reactome Gene Sets	R-HSA-9675108	Nervous system development	-2.25411	-0.563638	12/577	388,1826,1947,1969,5649,6091,6383,9355,23129,56956,59277,64283	RHOB,DSCAM,EFNB1,EPHA2,RELN,ROBO1,SDC2,LHX2,PLXND1,LHX9,NTN4,ARHGEF28
12_Member	GO Biological Processes	GO:0021766	hippocampus development	-2.25325	-0.563638	4/80	493,1021,4747,5649	ATP2B4,CDK6,NEFL,RELN
13_Summary	GO Biological Processes	GO:0003151	outflow tract morphogenesis	-5.3352	-3.20649	7/75	182,2303,6091,6909,7042,7474,23129,7134,10395,27063,2304,4223,84695,1969,59277,3955,26032,3235,6657,9076,9355,2637,3899,57669,4915	JAG1,FOXC2,ROBO1,TBX2,TGFB2,WNT5A,PLXND1,TNNC1,DLC1,ANKRD1,FOXE1,MEOX2,LOXL3,EPHA2,NTN4,LFNG,SUSD5,HOXD9,SOX2,CLDN1,LHX2,GBX2,AFF3,EPB41L5,NTRK2
13_Member	GO Biological Processes	GO:0003151	outflow tract morphogenesis	-5.3352	-3.20649	7/75	182,2303,6091,6909,7042,7474,23129	JAG1,FOXC2,ROBO1,TBX2,TGFB2,WNT5A,PLXND1
13_Member	GO Biological Processes	GO:0003007	heart morphogenesis	-4.06218	-2.03693	10/251	182,2303,6091,6909,7042,7134,7474,10395,23129,27063	JAG1,FOXC2,ROBO1,TBX2,TGFB2,TNNC1,WNT5A,DLC1,PLXND1,ANKRD1
13_Member	GO Biological Processes	GO:0003205	cardiac chamber development	-4.00883	-1.98954	8/161	182,2303,6091,6909,7042,7134,7474,23129	JAG1,FOXC2,ROBO1,TBX2,TGFB2,TNNC1,WNT5A,PLXND1
13_Member	GO Biological Processes	GO:0003206	cardiac chamber morphogenesis	-3.98212	-1.97452	7/121	182,2303,6091,6909,7042,7134,7474	JAG1,FOXC2,ROBO1,TBX2,TGFB2,TNNC1,WNT5A
13_Member	GO Biological Processes	GO:0060021	roof of mouth development	-3.93114	-1.9405	6/86	2304,4223,6909,7042,7474,84695	FOXE1,MEOX2,TBX2,TGFB2,WNT5A,LOXL3
13_Member	GO Biological Processes	GO:0072132	mesenchyme morphogenesis	-3.89982	-1.91469	5/55	2303,6091,6909,7042,7474	FOXC2,ROBO1,TBX2,TGFB2,WNT5A
13_Member	GO Biological Processes	GO:0035904	aorta development	-3.78953	-1.81361	5/58	182,6091,6909,7042,23129	JAG1,ROBO1,TBX2,TGFB2,PLXND1
13_Member	GO Biological Processes	GO:0060840	artery development	-3.57171	-1.63813	6/100	182,2303,6091,6909,7042,23129	JAG1,FOXC2,ROBO1,TBX2,TGFB2,PLXND1
13_Member	GO Biological Processes	GO:0003279	cardiac septum development	-3.50226	-1.57512	6/103	182,6091,6909,7042,7474,23129	JAG1,ROBO1,TBX2,TGFB2,WNT5A,PLXND1
13_Member	GO Biological Processes	GO:0060411	cardiac septum morphogenesis	-3.4637	-1.53974	5/68	182,6091,6909,7042,7474	JAG1,ROBO1,TBX2,TGFB2,WNT5A
13_Member	GO Biological Processes	GO:0003184	pulmonary valve morphogenesis	-3.37286	-1.46903	3/17	182,6091,7042	JAG1,ROBO1,TGFB2
13_Member	GO Biological Processes	GO:0022612	gland morphogenesis	-3.14896	-1.27439	6/120	1969,6909,7042,7474,23129,59277	EPHA2,TBX2,TGFB2,WNT5A,PLXND1,NTN4
13_Member	GO Biological Processes	GO:0003197	endocardial cushion development	-3.10256	-1.23221	4/47	182,6091,6909,7042	JAG1,ROBO1,TBX2,TGFB2
13_Member	GO Biological Processes	GO:0003177	pulmonary valve development	-3.09286	-1.22799	3/21	182,6091,7042	JAG1,ROBO1,TGFB2
13_Member	GO Biological Processes	GO:0003231	cardiac ventricle development	-3.09277	-1.22799	6/123	182,2303,6091,7042,7134,7474	JAG1,FOXC2,ROBO1,TGFB2,TNNC1,WNT5A
13_Member	GO Biological Processes	GO:0007219	Notch signaling pathway	-3.0547	-1.19541	7/172	182,2303,3955,6091,6909,7042,26032	JAG1,FOXC2,LFNG,ROBO1,TBX2,TGFB2,SUSD5
13_Member	GO Biological Processes	GO:0003148	outflow tract septum morphogenesis	-2.86631	-1.05361	3/25	6091,6909,7042	ROBO1,TBX2,TGFB2
13_Member	GO Biological Processes	GO:0062009	secondary palate development	-2.86631	-1.05361	3/25	2304,7042,7474	FOXE1,TGFB2,WNT5A
13_Member	GO Biological Processes	GO:0033598	mammary gland epithelial cell proliferation	-2.72118	-0.930013	3/28	1969,6091,7474	EPHA2,ROBO1,WNT5A
13_Member	GO Biological Processes	GO:0048732	gland development	-2.70166	-0.916295	11/440	1969,2304,3235,6091,6657,6909,7042,7474,9076,23129,59277	EPHA2,FOXE1,HOXD9,ROBO1,SOX2,TBX2,TGFB2,WNT5A,CLDN1,PLXND1,NTN4
13_Member	GO Biological Processes	GO:0003272	endocardial cushion formation	-2.63365	-0.866329	3/30	6091,6909,7042	ROBO1,TBX2,TGFB2
13_Member	GO Biological Processes	GO:0021772	olfactory bulb development	-2.59226	-0.838011	3/31	6091,7474,9355	ROBO1,WNT5A,LHX2
13_Member	GO Biological Processes	GO:0021884	forebrain neuron development	-2.59226	-0.838011	3/31	2637,6091,7474	GBX2,ROBO1,WNT5A
13_Member	GO Biological Processes	GO:0007435	salivary gland morphogenesis	-2.55233	-0.807625	3/32	7042,23129,59277	TGFB2,PLXND1,NTN4
13_Member	GO Biological Processes	GO:0021988	olfactory lobe development	-2.51376	-0.776335	3/33	6091,7474,9355	ROBO1,WNT5A,LHX2
13_Member	GO Biological Processes	GO:0007431	salivary gland development	-2.47646	-0.744164	3/34	7042,23129,59277	TGFB2,PLXND1,NTN4
13_Member	GO Biological Processes	GO:0035909	aorta morphogenesis	-2.47646	-0.744164	3/34	182,6909,7042	JAG1,TBX2,TGFB2
13_Member	GO Biological Processes	GO:0030326	embryonic limb morphogenesis	-2.40924	-0.689164	5/117	3235,3899,6909,7042,7474	HOXD9,AFF3,TBX2,TGFB2,WNT5A
13_Member	GO Biological Processes	GO:0035113	embryonic appendage morphogenesis	-2.40924	-0.689164	5/117	3235,3899,6909,7042,7474	HOXD9,AFF3,TBX2,TGFB2,WNT5A
13_Member	GO Biological Processes	GO:0048844	artery morphogenesis	-2.37357	-0.6612	4/74	182,2303,6909,7042	JAG1,FOXC2,TBX2,TGFB2
13_Member	GO Biological Processes	GO:0048736	appendage development	-2.3462	-0.641549	6/173	3235,3899,4223,6909,7042,7474	HOXD9,AFF3,MEOX2,TBX2,TGFB2,WNT5A
13_Member	GO Biological Processes	GO:0060173	limb development	-2.3462	-0.641549	6/173	3235,3899,4223,6909,7042,7474	HOXD9,AFF3,MEOX2,TBX2,TGFB2,WNT5A
13_Member	GO Biological Processes	GO:0003203	endocardial cushion morphogenesis	-2.30663	-0.606736	3/39	6091,6909,7042	ROBO1,TBX2,TGFB2
13_Member	GO Biological Processes	GO:0060412	ventricular septum morphogenesis	-2.27558	-0.580394	3/40	6091,7042,7474	ROBO1,TGFB2,WNT5A
13_Member	GO Biological Processes	GO:0048565	digestive tract development	-2.2589	-0.566511	5/127	2304,6909,7042,7474,57669	FOXE1,TBX2,TGFB2,WNT5A,EPB41L5
13_Member	GO Biological Processes	GO:1905314	semi-lunar valve development	-2.24539	-0.558547	3/41	182,6091,7042	JAG1,ROBO1,TGFB2
13_Member	GO Biological Processes	GO:0060443	mammary gland morphogenesis	-2.15956	-0.498198	3/44	1969,6909,7474	EPHA2,TBX2,WNT5A
13_Member	GO Biological Processes	GO:0035272	exocrine system development	-2.1324	-0.476552	3/45	7042,23129,59277	TGFB2,PLXND1,NTN4
13_Member	GO Biological Processes	GO:0055123	digestive system development	-2.12245	-0.470854	5/137	2304,6909,7042,7474,57669	FOXE1,TBX2,TGFB2,WNT5A,EPB41L5
13_Member	GO Biological Processes	GO:0035107	appendage morphogenesis	-2.09664	-0.453429	5/139	3235,3899,6909,7042,7474	HOXD9,AFF3,TBX2,TGFB2,WNT5A
13_Member	GO Biological Processes	GO:0035108	limb morphogenesis	-2.09664	-0.453429	5/139	3235,3899,6909,7042,7474	HOXD9,AFF3,TBX2,TGFB2,WNT5A
13_Member	GO Biological Processes	GO:0030879	mammary gland development	-2.0839	-0.442355	5/140	1969,3235,6091,6909,7474	EPHA2,HOXD9,ROBO1,TBX2,WNT5A
13_Member	GO Biological Processes	GO:0045747	positive regulation of Notch signaling pathway	-2.08007	-0.441816	3/47	182,6091,7042	JAG1,ROBO1,TGFB2
13_Member	GO Biological Processes	GO:0021954	central nervous system neuron development	-2.07456	-0.439582	4/90	2637,4915,6091,7474	GBX2,NTRK2,ROBO1,WNT5A
14_Summary	GO Biological Processes	GO:0060485	mesenchyme development	-4.89862	-2.80408	12/292	182,1947,2303,2637,6091,6909,7042,7474,8091,57669,84695,161742,3955,4223,1969,3679,6657,3235,5649,9355,10468,463,2353,9076,27063	JAG1,EFNB1,FOXC2,GBX2,ROBO1,TBX2,TGFB2,WNT5A,HMGA2,EPB41L5,LOXL3,SPRED1,LFNG,MEOX2,EPHA2,ITGA7,SOX2,HOXD9,RELN,LHX2,FST,ZFHX3,FOS,CLDN1,ANKRD1
14_Member	GO Biological Processes	GO:0060485	mesenchyme development	-4.89862	-2.80408	12/292	182,1947,2303,2637,6091,6909,7042,7474,8091,57669,84695,161742	JAG1,EFNB1,FOXC2,GBX2,ROBO1,TBX2,TGFB2,WNT5A,HMGA2,EPB41L5,LOXL3,SPRED1
14_Member	GO Biological Processes	GO:0048762	mesenchymal cell differentiation	-4.25421	-2.20637	10/238	182,1947,2303,2637,7042,7474,8091,57669,84695,161742	JAG1,EFNB1,FOXC2,GBX2,TGFB2,WNT5A,HMGA2,EPB41L5,LOXL3,SPRED1
14_Member	GO Biological Processes	GO:0061053	somite development	-3.98796	-1.97455	6/84	2303,3955,4223,7474,57669,84695	FOXC2,LFNG,MEOX2,WNT5A,EPB41L5,LOXL3
14_Member	GO Biological Processes	GO:0001704	formation of primary germ layer	-3.98212	-1.97452	7/121	1969,2303,3679,6657,7474,8091,57669	EPHA2,FOXC2,ITGA7,SOX2,WNT5A,HMGA2,EPB41L5
14_Member	GO Biological Processes	GO:0007389	pattern specification process	-3.79371	-1.81582	13/439	1947,2303,2637,3235,3955,4223,5649,6091,6909,7474,9355,10468,57669	EFNB1,FOXC2,GBX2,HOXD9,LFNG,MEOX2,RELN,ROBO1,TBX2,WNT5A,LHX2,FST,EPB41L5
14_Member	GO Biological Processes	GO:0001756	somitogenesis	-3.58708	-1.65025	5/64	2303,3955,4223,7474,57669	FOXC2,LFNG,MEOX2,WNT5A,EPB41L5
14_Member	GO Biological Processes	GO:0048339	paraxial mesoderm development	-3.37286	-1.46903	3/17	2303,7474,57669	FOXC2,WNT5A,EPB41L5
14_Member	GO Biological Processes	GO:0001707	mesoderm formation	-3.34831	-1.449	5/72	1969,2303,7474,8091,57669	EPHA2,FOXC2,WNT5A,HMGA2,EPB41L5
14_Member	GO Biological Processes	GO:0048332	mesoderm morphogenesis	-3.29333	-1.40291	5/74	1969,2303,7474,8091,57669	EPHA2,FOXC2,WNT5A,HMGA2,EPB41L5
14_Member	GO Biological Processes	GO:0001837	epithelial to mesenchymal transition	-3.25615	-1.37301	7/159	182,7042,7474,8091,57669,84695,161742	JAG1,TGFB2,WNT5A,HMGA2,EPB41L5,LOXL3,SPRED1
14_Member	GO Biological Processes	GO:0003002	regionalization	-3.10718	-1.23434	10/331	2303,2637,3235,3955,4223,5649,6091,7474,9355,57669	FOXC2,GBX2,HOXD9,LFNG,MEOX2,RELN,ROBO1,WNT5A,LHX2,EPB41L5
14_Member	GO Biological Processes	GO:0007498	mesoderm development	-2.98515	-1.13399	6/129	1969,2303,7474,8091,9355,57669	EPHA2,FOXC2,WNT5A,HMGA2,LHX2,EPB41L5
14_Member	GO Biological Processes	GO:0007369	gastrulation	-2.8578	-1.04632	7/186	1969,2303,3679,6657,7474,8091,57669	EPHA2,FOXC2,ITGA7,SOX2,WNT5A,HMGA2,EPB41L5
14_Member	GO Biological Processes	GO:0035282	segmentation	-2.76248	-0.965438	5/97	2303,3955,4223,7474,57669	FOXC2,LFNG,MEOX2,WNT5A,EPB41L5
14_Member	GO Biological Processes	GO:0009952	anterior/posterior pattern specification	-2.65437	-0.880372	7/202	2303,2637,3235,3955,4223,7474,57669	FOXC2,GBX2,HOXD9,LFNG,MEOX2,WNT5A,EPB41L5
14_Member	GO Biological Processes	GO:0071559	response to transforming growth factor beta	-2.63731	-0.866668	8/260	463,2353,7042,7474,9076,27063,57669,161742	ZFHX3,FOS,TGFB2,WNT5A,CLDN1,ANKRD1,EPB41L5,SPRED1
14_Member	GO Biological Processes	GO:0009880	embryonic pattern specification	-2.50581	-0.769418	4/68	1947,4223,7474,57669	EFNB1,MEOX2,WNT5A,EPB41L5
14_Member	GO Biological Processes	GO:0071560	cellular response to transforming growth factor beta stimulus	-2.11491	-0.464161	7/254	2353,7042,7474,9076,27063,57669,161742	FOS,TGFB2,WNT5A,CLDN1,ANKRD1,EPB41L5,SPRED1
15_Summary	GO Biological Processes	GO:0007169	transmembrane receptor protein tyrosine kinase signaling pathway	-4.84648	-2.75429	18/629	920,1947,1969,2250,2303,3485,4915,6091,7474,9185,10019,23236,26999,54206,57091,64283,161198,255324,3976,5649,2149,10125,161742	CD4,EFNB1,EPHA2,FGF5,FOXC2,IGFBP2,NTRK2,ROBO1,WNT5A,REPS2,SH2B3,PLCB1,CYFIP2,ERRFI1,CASS4,ARHGEF28,CLEC14A,EPGN,LIF,RELN,F2R,RASGRP1,SPRED1
15_Member	GO Biological Processes	GO:0007169	transmembrane receptor protein tyrosine kinase signaling pathway	-4.84648	-2.75429	18/629	920,1947,1969,2250,2303,3485,4915,6091,7474,9185,10019,23236,26999,54206,57091,64283,161198,255324	CD4,EFNB1,EPHA2,FGF5,FOXC2,IGFBP2,NTRK2,ROBO1,WNT5A,REPS2,SH2B3,PLCB1,CYFIP2,ERRFI1,CASS4,ARHGEF28,CLEC14A,EPGN
15_Member	GO Biological Processes	GO:0018108	peptidyl-tyrosine phosphorylation	-2.18297	-0.512345	9/376	920,1969,3976,4915,5649,10019,54206,57091,255324	CD4,EPHA2,LIF,NTRK2,RELN,SH2B3,ERRFI1,CASS4,EPGN
15_Member	GO Biological Processes	GO:0018212	peptidyl-tyrosine modification	-2.16136	-0.498198	9/379	920,1969,3976,4915,5649,10019,54206,57091,255324	CD4,EPHA2,LIF,NTRK2,RELN,SH2B3,ERRFI1,CASS4,EPGN
15_Member	GO Biological Processes	GO:0070372	regulation of ERK1 and ERK2 cascade	-2.14041	-0.482854	8/315	920,1969,2149,3976,4915,10125,54206,161742	CD4,EPHA2,F2R,LIF,NTRK2,RASGRP1,ERRFI1,SPRED1
15_Member	GO Biological Processes	GO:0061097	regulation of protein tyrosine kinase activity	-2.07456	-0.439582	4/90	5649,54206,57091,255324	RELN,ERRFI1,CASS4,EPGN
15_Member	GO Biological Processes	GO:0050730	regulation of peptidyl-tyrosine phosphorylation	-2.02798	-0.408211	7/264	920,3976,5649,10019,54206,57091,255324	CD4,LIF,RELN,SH2B3,ERRFI1,CASS4,EPGN
16_Summary	WikiPathways	WP2840	Hair follicle development: cytodifferentiation - part 3 of 3	-4.84027	-2.7504	7/89	2304,2353,6657,7474,8549,9355,10468,182,1969,7042,7357,9076,54206,2637,10395,10653,57669	FOXE1,FOS,SOX2,WNT5A,LGR5,LHX2,FST,JAG1,EPHA2,TGFB2,UGCG,CLDN1,ERRFI1,GBX2,DLC1,SPINT2,EPB41L5
16_Member	WikiPathways	WP2840	Hair follicle development: cytodifferentiation - part 3 of 3	-4.84027	-2.7504	7/89	2304,2353,6657,7474,8549,9355,10468	FOXE1,FOS,SOX2,WNT5A,LGR5,LHX2,FST
16_Member	GO Biological Processes	GO:0043588	skin development	-4.60649	-2.52581	11/263	182,1969,2304,7042,7357,7474,8549,9076,9355,10468,54206	JAG1,EPHA2,FOXE1,TGFB2,UGCG,WNT5A,LGR5,CLDN1,LHX2,FST,ERRFI1
16_Member	GO Biological Processes	GO:0001942	hair follicle development	-4.07615	-2.0489	6/81	2304,7042,7474,8549,9355,10468	FOXE1,TGFB2,WNT5A,LGR5,LHX2,FST
16_Member	GO Biological Processes	GO:0022404	molting cycle process	-3.98796	-1.97455	6/84	2304,7042,7474,8549,9355,10468	FOXE1,TGFB2,WNT5A,LGR5,LHX2,FST
16_Member	GO Biological Processes	GO:0022405	hair cycle process	-3.98796	-1.97455	6/84	2304,7042,7474,8549,9355,10468	FOXE1,TGFB2,WNT5A,LGR5,LHX2,FST
16_Member	GO Biological Processes	GO:0051798	positive regulation of hair follicle development	-3.97083	-1.96895	3/11	7042,7474,10468	TGFB2,WNT5A,FST
16_Member	GO Biological Processes	GO:0098773	skin epidermis development	-3.95936	-1.95938	6/85	2304,7042,7474,8549,9355,10468	FOXE1,TGFB2,WNT5A,LGR5,LHX2,FST
16_Member	GO Biological Processes	GO:0042303	molting cycle	-3.41326	-1.49472	6/107	2304,7042,7474,8549,9355,10468	FOXE1,TGFB2,WNT5A,LGR5,LHX2,FST
16_Member	GO Biological Processes	GO:0042633	hair cycle	-3.41326	-1.49472	6/107	2304,7042,7474,8549,9355,10468	FOXE1,TGFB2,WNT5A,LGR5,LHX2,FST
16_Member	GO Biological Processes	GO:0051797	regulation of hair follicle development	-3.37286	-1.46903	3/17	7042,7474,10468	TGFB2,WNT5A,FST
16_Member	GO Biological Processes	GO:0021915	neural tube development	-3.35603	-1.45522	7/153	1969,2637,7042,7474,9355,10395,10653	EPHA2,GBX2,TGFB2,WNT5A,LHX2,DLC1,SPINT2
16_Member	GO Biological Processes	GO:0008544	epidermis development	-3.1781	-1.30212	10/324	182,1969,2304,7042,7357,7474,8549,9355,10468,54206	JAG1,EPHA2,FOXE1,TGFB2,UGCG,WNT5A,LGR5,LHX2,FST,ERRFI1
16_Member	GO Biological Processes	GO:0001843	neural tube closure	-2.92879	-1.096	5/89	7042,7474,9355,10395,10653	TGFB2,WNT5A,LHX2,DLC1,SPINT2
16_Member	GO Biological Processes	GO:0060606	tube closure	-2.90707	-1.08461	5/90	7042,7474,9355,10395,10653	TGFB2,WNT5A,LHX2,DLC1,SPINT2
16_Member	GO Biological Processes	GO:0042634	regulation of hair cycle	-2.8159	-1.0129	3/26	7042,7474,10468	TGFB2,WNT5A,FST
16_Member	GO Biological Processes	GO:0014020	primary neural tube formation	-2.80251	-1.0019	5/95	7042,7474,9355,10395,10653	TGFB2,WNT5A,LHX2,DLC1,SPINT2
16_Member	GO Biological Processes	GO:0016331	morphogenesis of embryonic epithelium	-2.68059	-0.899806	6/148	7042,7474,9355,10395,10653,57669	TGFB2,WNT5A,LHX2,DLC1,SPINT2,EPB41L5
16_Member	GO Biological Processes	GO:0031069	hair follicle morphogenesis	-2.67658	-0.898069	3/29	2304,7042,10468	FOXE1,TGFB2,FST
16_Member	GO Biological Processes	GO:0001841	neural tube formation	-2.648	-0.875127	5/103	7042,7474,9355,10395,10653	TGFB2,WNT5A,LHX2,DLC1,SPINT2
16_Member	GO Biological Processes	GO:0048730	epidermis morphogenesis	-2.51376	-0.776335	3/33	2304,7042,10468	FOXE1,TGFB2,FST
16_Member	GO Biological Processes	GO:0001838	embryonic epithelial tube formation	-2.33219	-0.629448	5/122	7042,7474,9355,10395,10653	TGFB2,WNT5A,LHX2,DLC1,SPINT2
16_Member	GO Biological Processes	GO:0072175	epithelial tube formation	-2.1755	-0.509274	5/133	7042,7474,9355,10395,10653	TGFB2,WNT5A,LHX2,DLC1,SPINT2
17_Summary	GO Biological Processes	GO:0070100	negative regulation of chemokine-mediated signaling pathway	-4.63285	-2.5476	3/7	6091,10019,11240,8970,1240	ROBO1,SH2B3,PADI2,H2BC11,CMKLR1
17_Member	GO Biological Processes	GO:0070100	negative regulation of chemokine-mediated signaling pathway	-4.63285	-2.5476	3/7	6091,10019,11240	ROBO1,SH2B3,PADI2
17_Member	GO Biological Processes	GO:0070099	regulation of chemokine-mediated signaling pathway	-4.10628	-2.07295	3/10	6091,10019,11240	ROBO1,SH2B3,PADI2
17_Member	GO Biological Processes	GO:0001960	negative regulation of cytokine-mediated signaling pathway	-2.23422	-0.551943	4/81	6091,8970,10019,11240	ROBO1,H2BC11,SH2B3,PADI2
17_Member	GO Biological Processes	GO:0060761	negative regulation of response to cytokine stimulus	-2.14308	-0.484658	4/86	6091,8970,10019,11240	ROBO1,H2BC11,SH2B3,PADI2
17_Member	GO Biological Processes	GO:0070098	chemokine-mediated signaling pathway	-2.10836	-0.459298	4/88	1240,6091,10019,11240	CMKLR1,ROBO1,SH2B3,PADI2
18_Summary	KEGG Pathway	ko04261	Adrenergic signaling in cardiomyocytes	-4.34996	-2.28272	8/144	112,185,493,781,2776,5521,7134,23236,1359,51200,94274,2149,4842,8477,8549,23266,182,2353,7042,2304,10125,3976	ADCY6,AGTR1,ATP2B4,CACNA2D1,GNAQ,PPP2R2B,TNNC1,PLCB1,CPA3,CPA4,PPP1R14A,F2R,NOS1,GPR65,LGR5,ADGRL2,JAG1,FOS,TGFB2,FOXE1,RASGRP1,LIF
18_Member	KEGG Pathway	ko04261	Adrenergic signaling in cardiomyocytes	-4.34996	-2.28272	8/144	112,185,493,781,2776,5521,7134,23236	ADCY6,AGTR1,ATP2B4,CACNA2D1,GNAQ,PPP2R2B,TNNC1,PLCB1
18_Member	KEGG Pathway	hsa04261	Adrenergic signaling in cardiomyocytes	-4.28639	-2.23431	8/147	112,185,493,781,2776,5521,7134,23236	ADCY6,AGTR1,ATP2B4,CACNA2D1,GNAQ,PPP2R2B,TNNC1,PLCB1
18_Member	KEGG Pathway	hsa04972	Pancreatic secretion	-3.50226	-1.57512	6/103	112,493,1359,2776,23236,51200	ADCY6,ATP2B4,CPA3,GNAQ,PLCB1,CPA4
18_Member	WikiPathways	WP4962	Airway smooth muscle cell contraction	-3.37286	-1.46903	3/17	2776,23236,94274	GNAQ,PLCB1,PPP1R14A
18_Member	KEGG Pathway	hsa04020	Calcium signaling pathway	-2.91212	-1.08461	7/182	185,493,2149,2776,4842,7134,23236	AGTR1,ATP2B4,F2R,GNAQ,NOS1,TNNC1,PLCB1
18_Member	KEGG Pathway	ko04020	Calcium signaling pathway	-2.91212	-1.08461	7/182	185,493,2149,2776,4842,7134,23236	AGTR1,ATP2B4,F2R,GNAQ,NOS1,TNNC1,PLCB1
18_Member	KEGG Pathway	ko04970	Salivary secretion	-2.90707	-1.08461	5/90	112,493,2776,4842,23236	ADCY6,ATP2B4,GNAQ,NOS1,PLCB1
18_Member	KEGG Pathway	hsa04970	Salivary secretion	-2.8229	-1.01749	5/94	112,493,2776,4842,23236	ADCY6,ATP2B4,GNAQ,NOS1,PLCB1
18_Member	KEGG Pathway	ko04972	Pancreatic secretion	-2.78237	-0.984144	5/96	112,493,1359,2776,23236	ADCY6,ATP2B4,CPA3,GNAQ,PLCB1
18_Member	GO Biological Processes	GO:0007189	adenylate cyclase-activating G protein-coupled receptor signaling pathway	-2.71034	-0.922663	6/146	112,493,2776,8477,8549,23266	ADCY6,ATP2B4,GNAQ,GPR65,LGR5,ADGRL2
18_Member	KEGG Pathway	hsa04371	Apelin signaling pathway	-2.71034	-0.922663	6/146	112,182,185,2776,4842,23236	ADCY6,JAG1,AGTR1,GNAQ,NOS1,PLCB1
18_Member	KEGG Pathway	hsa04713	circadian entrainment	-2.70423	-0.917706	5/100	112,2353,2776,4842,23236	ADCY6,FOS,GNAQ,NOS1,PLCB1
18_Member	KEGG Pathway	hsa04925	aldosterone synthesis and secretion	-2.66653	-0.890279	5/102	112,185,493,2776,23236	ADCY6,AGTR1,ATP2B4,GNAQ,PLCB1
18_Member	KEGG Pathway	ko05142	Chagas disease (American trypanosomiasis)	-2.66653	-0.890279	5/102	2353,2776,5521,7042,23236	FOS,GNAQ,PPP2R2B,TGFB2,PLCB1
18_Member	Canonical Pathways	M8	PID ENDOTHELIN PATHWAY	-2.62673	-0.863381	4/63	112,2353,2776,23236	ADCY6,FOS,GNAQ,PLCB1
18_Member	GO Biological Processes	GO:1905144	response to acetylcholine	-2.59226	-0.838011	3/31	493,2776,23236	ATP2B4,GNAQ,PLCB1
18_Member	GO Biological Processes	GO:1905145	cellular response to acetylcholine	-2.59226	-0.838011	3/31	493,2776,23236	ATP2B4,GNAQ,PLCB1
18_Member	KEGG Pathway	ko04924	Renin secretion	-2.57709	-0.82707	4/65	112,185,2776,23236	ADCY6,AGTR1,GNAQ,PLCB1
18_Member	KEGG Pathway	hsa05142	Chagas disease (American trypanosomiasis)	-2.576	-0.82707	5/107	2353,2776,5521,7042,23236	FOS,GNAQ,PPP2R2B,TGFB2,PLCB1
18_Member	KEGG Pathway	hsa04924	Renin secretion	-2.39473	-0.679428	4/73	112,185,2776,23236	ADCY6,AGTR1,GNAQ,PLCB1
18_Member	KEGG Pathway	hsa04270	Vascular smooth muscle contraction	-2.34729	-0.641549	5/121	112,185,2776,23236,94274	ADCY6,AGTR1,GNAQ,PLCB1,PPP1R14A
18_Member	KEGG Pathway	ko04270	Vascular smooth muscle contraction	-2.34729	-0.641549	5/121	112,185,2776,23236,94274	ADCY6,AGTR1,GNAQ,PLCB1,PPP1R14A
18_Member	KEGG Pathway	hsa04918	Thyroid hormone synthesis	-2.27256	-0.579233	4/79	112,2304,2776,23236	ADCY6,FOXE1,GNAQ,PLCB1
18_Member	KEGG Pathway	hsa04611	Platelet activation	-2.21661	-0.5404	5/130	112,2149,2776,10125,23236	ADCY6,F2R,GNAQ,RASGRP1,PLCB1
18_Member	KEGG Pathway	ko04925	Aldosterone synthesis and secretion	-2.21547	-0.5404	4/82	112,185,2776,23236	ADCY6,AGTR1,GNAQ,PLCB1
18_Member	KEGG Pathway	ko04961	Endocrine and other factor-regulated calcium reabsorption	-2.08007	-0.441816	3/47	112,2776,23236	ADCY6,GNAQ,PLCB1
18_Member	WikiPathways	WP5083	Neuroinflammation and glutamatergic signaling	-2.0341	-0.411167	5/144	2353,3976,4842,7042,23236	FOS,LIF,NOS1,TGFB2,PLCB1
18_Member	KEGG Pathway	hsa04961	Endocrine and other factor-regulated calcium reabsorption	-2.00613	-0.389497	3/50	112,2776,23236	ADCY6,GNAQ,PLCB1
19_Summary	GO Biological Processes	GO:0048839	inner ear development	-4.31664	-2.26028	9/188	182,2637,4094,5205,6657,7042,7474,8549,55084,656,5521,8994,1021,1969,2303,5552	JAG1,GBX2,MAF,ATP8B1,SOX2,TGFB2,WNT5A,LGR5,SOBP,BMP8B,PPP2R2B,LIMD1,CDK6,EPHA2,FOXC2,SRGN
19_Member	GO Biological Processes	GO:0048839	inner ear development	-4.31664	-2.26028	9/188	182,2637,4094,5205,6657,7042,7474,8549,55084	JAG1,GBX2,MAF,ATP8B1,SOX2,TGFB2,WNT5A,LGR5,SOBP
19_Member	GO Biological Processes	GO:0043583	ear development	-3.90132	-1.91469	9/213	182,2637,4094,5205,6657,7042,7474,8549,55084	JAG1,GBX2,MAF,ATP8B1,SOX2,TGFB2,WNT5A,LGR5,SOBP
19_Member	KEGG Pathway	ko04390	Hippo signaling pathway	-2.59423	-0.838011	6/154	656,5521,6657,7042,7474,8994	BMP8B,PPP2R2B,SOX2,TGFB2,WNT5A,LIMD1
19_Member	GO Biological Processes	GO:0001503	ossification	-2.41973	-0.695511	10/411	182,656,1021,1969,2303,5552,6657,7042,7474,8994	JAG1,BMP8B,CDK6,EPHA2,FOXC2,SRGN,SOX2,TGFB2,WNT5A,LIMD1
19_Member	KEGG Pathway	hsa04390	Hippo signaling pathway	-2.33411	-0.630411	6/174	656,5521,6657,7042,7474,8994	BMP8B,PPP2R2B,SOX2,TGFB2,WNT5A,LIMD1
20_Summary	GO Biological Processes	GO:0050673	epithelial cell proliferation	-4.27138	-2.22143	14/450	185,1021,1969,2301,6091,6657,7042,7474,8549,9076,10468,54206,54566,255324,2149,2151,2303,2776,4217,4747,10019,388,57669,1240,1826,5649,57091	AGTR1,CDK6,EPHA2,FOXE3,ROBO1,SOX2,TGFB2,WNT5A,LGR5,CLDN1,FST,ERRFI1,EPB41L4B,EPGN,F2R,F2RL2,FOXC2,GNAQ,MAP3K5,NEFL,SH2B3,RHOB,EPB41L5,CMKLR1,DSCAM,RELN,CASS4
20_Member	GO Biological Processes	GO:0050673	epithelial cell proliferation	-4.27138	-2.22143	14/450	185,1021,1969,2301,6091,6657,7042,7474,8549,9076,10468,54206,54566,255324	AGTR1,CDK6,EPHA2,FOXE3,ROBO1,SOX2,TGFB2,WNT5A,LGR5,CLDN1,FST,ERRFI1,EPB41L4B,EPGN
20_Member	GO Biological Processes	GO:0050678	regulation of epithelial cell proliferation	-3.10053	-1.23158	11/392	185,1021,2301,6091,6657,7042,7474,9076,54206,54566,255324	AGTR1,CDK6,FOXE3,ROBO1,SOX2,TGFB2,WNT5A,CLDN1,ERRFI1,EPB41L4B,EPGN
20_Member	GO Biological Processes	GO:0009611	response to wounding	-2.40402	-0.687733	12/552	2149,2151,2303,2776,4217,4747,6657,7042,7474,9076,10019,54566	F2R,F2RL2,FOXC2,GNAQ,MAP3K5,NEFL,SOX2,TGFB2,WNT5A,CLDN1,SH2B3,EPB41L4B
20_Member	GO Biological Processes	GO:0042060	wound healing	-2.32582	-0.624032	10/424	2149,2151,2303,2776,4217,7042,7474,9076,10019,54566	F2R,F2RL2,FOXC2,GNAQ,MAP3K5,TGFB2,WNT5A,CLDN1,SH2B3,EPB41L4B
20_Member	GO Biological Processes	GO:0010634	positive regulation of epithelial cell migration	-2.29835	-0.5994	6/177	388,2303,7042,7474,54566,57669	RHOB,FOXC2,TGFB2,WNT5A,EPB41L4B,EPB41L5
20_Member	GO Biological Processes	GO:0040017	positive regulation of locomotion	-2.14681	-0.487536	12/596	388,1240,1826,2149,2303,5649,7042,7474,9076,54566,57091,57669	RHOB,CMKLR1,DSCAM,F2R,FOXC2,RELN,TGFB2,WNT5A,CLDN1,EPB41L4B,CASS4,EPB41L5
