# Supplementary material for: Transcriptional profiling of Hutchinson-Gilford Progeria syndrome fibroblasts reveals deficits in mesenchymal stem cell commitment to differentiation related to early events in endochondral ossification
Source: eLife journal article supplement (doi:10.7554/elife.81290), 2022-12-29
Supplement: table1-data1 [file metascape_result.xlsx]

## Sheet: Annotation
MyList	Gene ID	Type	Tax ID	Homologene Gene ID	Homologene Gene Tax ID	Gene Symbol	Description	Biological Process (GO)	Kinase Class (UniProt)	Protein Function (Protein Atlas)	Subcellular Location (Protein Atlas)	Drug (DrugBank)	Canonical Pathways	Hallmark Gene Sets	R-HSA-3214815 HDACs deacetylate histones	R-HSA-5689880 Ub-specific processing proteas	GO:0060968 regulation of gene silencing	GO:0045596 negative regulation of cell di	GO:0048729 tissue morphogenesis	hsa05200 Pathways in cancer	GO:0007423 sensory organ development	R-HSA-9675108 Nervous system development	GO:0061061 muscle structure development	GO:0007420 brain development	GO:0032989 cellular component morphogenes	GO:0001501 skeletal system development	WP2064 Neural crest differentiation	GO:0001667 ameboidal-type cell migration	GO:0001503 ossification	ko04390 Hippo signaling pathway	GO:0007169 transmembrane receptor protein	GO:0048863 stem cell differentiation	hsa05224 Breast cancer	R-HSA-5683057 MAPK family signaling cascades
AARSD1	80755	symbol	H. sapiens	80755	H. sapiens	AARSD1	alanyl-tRNA synthetase domain containing 1	GO:0006419 alanyl-tRNA aminoacylation;GO:0106074 aminoacyl-tRNA metabolism involved in translational fidelity;GO:0006450 regulation of translational fidelity		Predicted intracellular proteins	Cytosol;Nuclear membrane (Approved)				0.0	0.0	0.0	0.0	0.0	0.0	0.0	0.0	0.0	0.0	0.0	0.0	0.0	0.0	0.0	0.0	0.0	0.0	0.0	0.0
AATK	9625	symbol	H. sapiens	9625	H. sapiens	AATK	apoptosis associated tyrosine kinase	GO:0038083 peptidyl-tyrosine autophosphorylation;GO:0046777 protein autophosphorylation;GO:0018108 peptidyl-tyrosine phosphorylation	Tyr protein kinase family	ENZYME proteins:Transferases; Predicted intracellular proteins; Kinases:Tyr protein kinases; Enzymes	Mitochondria (Uncertain)				0.0	0.0	0.0	0.0	0.0	0.0	0.0	0.0	0.0	1.0	0.0	0.0	0.0	0.0	0.0	0.0	0.0	0.0	0.0	0.0
ABCA3	21	symbol	H. sapiens	21	H. sapiens	ABCA3	ATP binding cassette subfamily A member 3	GO:0032462 regulation of protein homooligomerization;GO:0032464 positive regulation of protein homooligomerization;GO:0032459 regulation of protein oligomerization		Transporters:Primary Active Transporters; Potential drug targets; Disease related genes	Cytosol;Nucleoplasm (Approved)		(M200)PID ERA GENOMIC PATHWAY	(M5948)HALLMARK BILE ACID METABOLISM; (M5906)HALLMARK ESTROGEN RESPONSE EARLY; (M5907)HALLMARK ESTROGEN RESPONSE LATE	0.0	0.0	0.0	0.0	0.0	0.0	0.0	0.0	0.0	0.0	0.0	0.0	0.0	0.0	0.0	0.0	0.0	0.0	0.0	1.0
ABCB9	23457	symbol	H. sapiens	23457	H. sapiens	ABCB9	ATP binding cassette subfamily B member 9	GO:0035672 oligopeptide transmembrane transport;GO:0006857 oligopeptide transport;GO:0019885 antigen processing and presentation of endogenous peptide antigen via MHC class I		Predicted intracellular proteins; Transporters:Primary Active Transporters	Vesicles (Supported)			(M5949)HALLMARK PEROXISOME	0.0	0.0	0.0	0.0	0.0	0.0	0.0	0.0	0.0	0.0	0.0	0.0	0.0	0.0	0.0	0.0	0.0	0.0	0.0	1.0
ABHD8	79575	symbol	H. sapiens	79575	H. sapiens	ABHD8	abhydrolase domain containing 8	GO:0006654 phosphatidic acid biosynthetic process;GO:0046473 phosphatidic acid metabolic process;GO:0055088 lipid homeostasis		Predicted intracellular proteins	Nucleoplasm (Approved); Additional: Nuclear bodies				0.0	0.0	0.0	0.0	0.0	0.0	0.0	0.0	0.0	0.0	0.0	0.0	0.0	0.0	0.0	0.0	0.0	0.0	0.0	0.0
ACHE	43	symbol	H. sapiens	43	H. sapiens	ACHE	acetylcholinesterase (Cartwright blood group)	GO:0032223 negative regulation of synaptic transmission, cholinergic;GO:0001507 acetylcholine catabolic process in synaptic cleft;GO:0006581 acetylcholine catabolic process		Predicted intracellular proteins; FDA approved drug targets:Small molecule drugs; ENZYME proteins:Hydrolases; Enzymes; Blood group antigen proteins	Golgi apparatus (Approved); Additional: Vesicles	Choline; Tacrine; Carbamoylcholine; Dipivefrin; Gallamine triethiodide; Pyridostigmine; Galantamine; Isoflurophate; Pralidoxime; Minaprine; Donepezil; Ranitidine; Demecarium; Physostigmine; Rivastigmine; Edrophonium; Ambenonium; Tubocurarine; Decamethonium; Neostigmine; Monoisopropylphosphorylserine; Propidium; 3,8-Diamino-6-Phenyl-5-[6-[1-[2-[(1,2,3,4-Tetrahydro-9-Acridinyl)Amino]Ethyl]-1h-1,2,3…	(M166)PID ATF2 PATHWAY	(M5919)HALLMARK HEDGEHOG SIGNALING; (M5909)HALLMARK MYOGENESIS; (M5950)HALLMARK ALLOGRAFT REJECTION	0.0	0.0	0.0	0.0	0.0	0.0	1.0	0.0	0.0	0.0	0.0	0.0	0.0	0.0	1.0	0.0	0.0	0.0	0.0	0.0
ACTG2	72	symbol	H. sapiens	72	H. sapiens	ACTG2	actin gamma 2, smooth muscle	GO:0090131 mesenchyme migration;GO:0072132 mesenchyme morphogenesis;GO:0060485 mesenchyme development		Predicted intracellular proteins; Disease related genes			(M16801)SIG REGULATION OF THE ACTIN CYTOSKELETON BY RHO GTPASES	(M5915)HALLMARK APICAL JUNCTION	0.0	0.0	0.0	0.0	1.0	0.0	0.0	1.0	0.0	0.0	0.0	0.0	0.0	1.0	0.0	0.0	0.0	1.0	0.0	0.0
ACTR3B	57180	symbol	H. sapiens	57180	H. sapiens	ACTR3B	actin related protein 3B	GO:0008150 biological_process		Predicted intracellular proteins					0.0	0.0	0.0	0.0	0.0	0.0	0.0	0.0	0.0	0.0	0.0	0.0	0.0	0.0	0.0	0.0	0.0	0.0	0.0	0.0
ACY1	95	symbol	H. sapiens	95	H. sapiens	ACY1	aminoacylase 1	GO:0006520 cellular amino acid metabolic process;GO:0019752 carboxylic acid metabolic process;GO:0043436 oxoacid metabolic process		Predicted intracellular proteins; ENZYME proteins:Hydrolases; Enzymes; Disease related genes; Potential drug targets; Peptidases:Metallopeptidases		Aspartic acid; Acetylcysteine; Copper			0.0	0.0	0.0	0.0	0.0	0.0	0.0	0.0	0.0	0.0	0.0	0.0	0.0	0.0	0.0	0.0	0.0	0.0	0.0	0.0
ADAM19	8728	symbol	H. sapiens	8728	H. sapiens	ADAM19	ADAM metallopeptidase domain 19	GO:2000049 positive regulation of cell-cell adhesion mediated by cadherin;GO:2000047 regulation of cell-cell adhesion mediated by cadherin;GO:0044331 cell-cell adhesion mediated by cadherin			Vesicles (Approved)		(M3468)NABA ECM REGULATORS; (M5885)NABA MATRISOME ASSOCIATED; (M5889)NABA MATRISOME	(M5947)HALLMARK IL2 STAT5 SIGNALING	0.0	0.0	0.0	0.0	0.0	0.0	0.0	0.0	0.0	0.0	0.0	0.0	0.0	0.0	0.0	0.0	0.0	0.0	0.0	0.0
ADAMTS15	170689	symbol	H. sapiens	170689	H. sapiens	ADAMTS15	ADAM metallopeptidase with thrombospondin type 1 motif 15	GO:0007520 myoblast fusion;GO:0000768 syncytium formation by plasma membrane fusion;GO:0140253 cell-cell fusion		Predicted secreted proteins	Cytosol (Approved)		(M3468)NABA ECM REGULATORS; (M5885)NABA MATRISOME ASSOCIATED; (M5889)NABA MATRISOME		0.0	0.0	0.0	0.0	0.0	0.0	0.0	0.0	1.0	0.0	0.0	0.0	0.0	0.0	0.0	0.0	0.0	0.0	0.0	0.0
ADAMTS4	9507	symbol	H. sapiens	9507	H. sapiens	ADAMTS4	ADAM metallopeptidase with thrombospondin type 1 motif 4	GO:0022617 extracellular matrix disassembly;GO:0030198 extracellular matrix organization;GO:0043062 extracellular structure organization		Cancer-related genes:Candidate cancer biomarkers; Transporters:Accessory Factors Involved in Transport; Predicted intracellular proteins; Predicted secreted proteins; ENZYME proteins:Hydrolases; Enzymes	Nuclear speckles (Supported)		(M3468)NABA ECM REGULATORS; (M5885)NABA MATRISOME ASSOCIATED; (M5889)NABA MATRISOME		0.0	0.0	0.0	0.0	0.0	0.0	0.0	0.0	0.0	0.0	0.0	1.0	0.0	0.0	0.0	0.0	0.0	0.0	0.0	0.0
ADAMTS7	11173	symbol	H. sapiens	11173	H. sapiens	ADAMTS7	ADAM metallopeptidase with thrombospondin type 1 motif 7	GO:0032331 negative regulation of chondrocyte differentiation;GO:0061037 negative regulation of cartilage development;GO:0032330 regulation of chondrocyte differentiation		Predicted secreted proteins	Vesicles (Supported)		(M3468)NABA ECM REGULATORS; (M5885)NABA MATRISOME ASSOCIATED; (M5889)NABA MATRISOME		0.0	0.0	0.0	1.0	0.0	0.0	0.0	0.0	0.0	0.0	0.0	1.0	0.0	0.0	0.0	0.0	0.0	0.0	0.0	0.0
ADCK4	79934	gene_synonym	H. sapiens	79934	H. sapiens	COQ8B	coenzyme Q8B	GO:0021692 cerebellar Purkinje cell layer morphogenesis;GO:0006744 ubiquinone biosynthetic process;GO:1901663 quinone biosynthetic process	Atypical: ADCK protein kinase family	Predicted intracellular proteins; Enzymes; Disease related genes; Potential drug targets; Kinases:Atypical kinases	Mitochondria (Enhanced)	Fostamatinib			0.0	0.0	0.0	0.0	0.0	0.0	0.0	0.0	0.0	1.0	0.0	0.0	0.0	0.0	0.0	0.0	0.0	0.0	0.0	0.0
ADCY6	112	symbol	H. sapiens	112	H. sapiens	ADCY6	adenylate cyclase 6	GO:1904116 response to vasopressin;GO:1904117 cellular response to vasopressin;GO:0035811 negative regulation of urine volume		ENZYME proteins:Lyases; Predicted intracellular proteins; Enzymes; Disease related genes; Potential drug targets	Golgi apparatus (Approved)		(M56)PID LPA4 PATHWAY; (M8)PID ENDOTHELIN PATHWAY; (M15)PID LYSOPHOSPHOLIPID PATHWAY	(M5898)HALLMARK DNA REPAIR; (M5905)HALLMARK ADIPOGENESIS	0.0	0.0	0.0	0.0	0.0	1.0	0.0	0.0	0.0	0.0	1.0	0.0	0.0	0.0	0.0	0.0	0.0	0.0	1.0	1.0
ADGRB2	576	symbol	H. sapiens	576	H. sapiens	ADGRB2	adhesion G protein-coupled receptor B2	GO:0033173 calcineurin-NFAT signaling cascade;GO:0097720 calcineurin-mediated signaling;GO:0048016 inositol phosphate-mediated signaling		Predicted intracellular proteins; Transporters; G-protein coupled receptors:GPCRs excl olfactory receptors; G-protein coupled receptors:Family 2 (B) receptors	Plasma membrane (Supported)				0.0	0.0	0.0	0.0	0.0	0.0	0.0	0.0	0.0	0.0	0.0	0.0	0.0	1.0	0.0	0.0	0.0	0.0	0.0	0.0
ADGRE2	30817	symbol	H. sapiens	30817	H. sapiens	ADGRE2	adhesion G protein-coupled receptor E2	GO:0043304 regulation of mast cell degranulation;GO:0033006 regulation of mast cell activation involved in immune response;GO:0033003 regulation of mast cell activation		CD markers; G-protein coupled receptors:Family 2 (B) receptors; Disease related genes; G-protein coupled receptors:GPCRs excl olfactory receptors; Potential drug targets	Vesicles (Uncertain); Additional: Cytosol				0.0	0.0	0.0	0.0	0.0	0.0	0.0	0.0	0.0	0.0	1.0	0.0	0.0	0.0	0.0	0.0	0.0	0.0	0.0	0.0
ADGRG2	10149	symbol	H. sapiens	10149	H. sapiens	ADGRG2	adhesion G protein-coupled receptor G2	GO:0007189 adenylate cyclase-activating G protein-coupled receptor signaling pathway;GO:0007188 adenylate cyclase-modulating G protein-coupled receptor signaling pathway;GO:0007283 spermatogenesis		Potential drug targets; G-protein coupled receptors:GPCRs excl olfactory receptors; Disease related genes; G-protein coupled receptors:Family 2 (B) receptors	Cytosol;Plasma membrane (Approved)				0.0	0.0	0.0	0.0	0.0	0.0	0.0	0.0	0.0	0.0	0.0	0.0	0.0	0.0	0.0	0.0	0.0	0.0	0.0	0.0
ADGRG6	57211	symbol	H. sapiens	57211	H. sapiens	ADGRG6	adhesion G protein-coupled receptor G6	GO:0060347 heart trabecula formation;GO:0060343 trabecula formation;GO:0022011 myelination in peripheral nervous system		G-protein coupled receptors:Family 2 (B) receptors; Predicted intracellular proteins; G-protein coupled receptors:GPCRs excl olfactory receptors; Disease related genes; Potential drug targets					0.0	0.0	0.0	0.0	0.0	0.0	0.0	1.0	1.0	0.0	0.0	0.0	0.0	0.0	0.0	0.0	0.0	0.0	0.0	0.0
ADGRL1	22859	symbol	H. sapiens	22859	H. sapiens	ADGRL1	adhesion G protein-coupled receptor L1	GO:0090129 positive regulation of synapse maturation;GO:0090128 regulation of synapse maturation;GO:0035584 calcium-mediated signaling using intracellular calcium source		Predicted intracellular proteins; G-protein coupled receptors:GPCRs excl olfactory receptors; G-protein coupled receptors:Family 2 (B) receptors					0.0	0.0	0.0	0.0	0.0	0.0	0.0	0.0	0.0	0.0	0.0	0.0	0.0	0.0	0.0	0.0	0.0	0.0	0.0	0.0
AEN	64782	symbol	H. sapiens	64782	H. sapiens	AEN	apoptosis enhancing nuclease	GO:0042771 intrinsic apoptotic signaling pathway in response to DNA damage by p53 class mediator;GO:0072332 intrinsic apoptotic signaling pathway by p53 class mediator;GO:0008630 intrinsic apoptotic signaling pathway in response to DNA damage		Predicted intracellular proteins	Nucleoli;Nucleoplasm (Supported); Additional: Nuclear membrane		(M256)PID TAP63 PATHWAY; (M19)PID P73PATHWAY	(M5939)HALLMARK P53 PATHWAY	0.0	0.0	0.0	0.0	0.0	0.0	0.0	0.0	0.0	0.0	0.0	0.0	0.0	0.0	0.0	0.0	0.0	0.0	0.0	0.0
AFAP1	60312	symbol	H. sapiens	60312	H. sapiens	AFAP1	actin filament associated protein 1	GO:0051493 regulation of cytoskeleton organization;GO:0033043 regulation of organelle organization;GO:0007010 cytoskeleton organization		Predicted intracellular proteins	Actin filaments;Cytosol (Supported); Additional: Focal adhesion sites				0.0	0.0	0.0	0.0	0.0	0.0	0.0	0.0	0.0	0.0	0.0	0.0	0.0	0.0	0.0	0.0	0.0	0.0	0.0	0.0
AFAP1-AS1	84740	symbol	H. sapiens	84740	H. sapiens	AFAP1-AS1	AFAP1 antisense RNA 1								0.0	0.0	0.0	0.0	0.0	0.0	0.0	0.0	0.0	0.0	0.0	0.0	0.0	0.0	0.0	0.0	0.0	0.0	0.0	0.0
AFAP1L2	84632	symbol	H. sapiens	84632	H. sapiens	AFAP1L2	actin filament associated protein 1 like 2	GO:0045742 positive regulation of epidermal growth factor receptor signaling pathway;GO:1901186 positive regulation of ERBB signaling pathway;GO:0061098 positive regulation of protein tyrosine kinase activity		Predicted intracellular proteins	Cytosol;Plasma membrane (Approved)			(M5916)HALLMARK APICAL SURFACE	0.0	0.0	0.0	0.0	0.0	0.0	0.0	0.0	0.0	0.0	0.0	0.0	0.0	0.0	0.0	0.0	1.0	0.0	0.0	0.0
AGO1	26523	symbol	H. sapiens	26523	H. sapiens	AGO1	argonaute RISC component 1	GO:0090625 mRNA cleavage involved in gene silencing by siRNA;GO:0035279 mRNA cleavage involved in gene silencing by miRNA;GO:0098795 mRNA cleavage involved in gene silencing		Predicted intracellular proteins	Cytoplasmic bodies (Supported); Additional: Cytosol				1.0	0.0	1.0	0.0	0.0	0.0	0.0	0.0	0.0	0.0	0.0	0.0	0.0	1.0	0.0	0.0	0.0	0.0	0.0	1.0
AGO2	27161	symbol	H. sapiens	27161	H. sapiens	AGO2	argonaute RISC catalytic component 2	GO:0045975 positive regulation of translation, ncRNA-mediated;GO:0035087 siRNA loading onto RISC involved in RNA interference;GO:0090625 mRNA cleavage involved in gene silencing by siRNA		Predicted intracellular proteins; ENZYME proteins:Hydrolases; Enzymes	Cytoplasmic bodies (Supported); Additional: Cytosol			(M5941)HALLMARK UV RESPONSE UP	1.0	0.0	1.0	0.0	0.0	0.0	0.0	0.0	0.0	0.0	0.0	0.0	0.0	1.0	0.0	0.0	0.0	0.0	0.0	1.0
AGRN	375790	symbol	H. sapiens	375790	H. sapiens	AGRN	agrin	GO:0045887 positive regulation of synaptic assembly at neuromuscular junction;GO:1904398 positive regulation of neuromuscular junction development;GO:0008582 regulation of synaptic assembly at neuromuscular junction		Predicted intracellular proteins; Predicted secreted proteins; Disease related genes	Cytosol (Approved); Additional: Plasma membrane		(M5887)NABA BASEMENT MEMBRANES; (M3008)NABA ECM GLYCOPROTEINS; (M5884)NABA CORE MATRISOME	(M5909)HALLMARK MYOGENESIS; (M5937)HALLMARK GLYCOLYSIS	0.0	0.0	0.0	0.0	0.0	0.0	0.0	1.0	0.0	0.0	1.0	0.0	0.0	0.0	0.0	0.0	0.0	0.0	0.0	0.0
AHCTF1P1	285116	symbol	H. sapiens	285116	H. sapiens	AHCTF1P1	AT-hook containing transcription factor 1 pseudogene 1								0.0	0.0	0.0	0.0	0.0	0.0	0.0	0.0	0.0	0.0	0.0	0.0	0.0	0.0	0.0	0.0	0.0	0.0	0.0	0.0
AIP	9049	symbol	H. sapiens	9049	H. sapiens	AIP	aryl hydrocarbon receptor interacting protein	GO:0051344 negative regulation of cyclic-nucleotide phosphodiesterase activity;GO:0022417 protein maturation by protein folding;GO:0051342 regulation of cyclic-nucleotide phosphodiesterase activity		Predicted intracellular proteins; Disease related genes	Cytosol (Supported)				0.0	0.0	1.0	0.0	0.0	0.0	0.0	0.0	0.0	0.0	0.0	0.0	0.0	0.0	0.0	0.0	0.0	0.0	0.0	0.0
AKAP5	9495	symbol	H. sapiens	9495	H. sapiens	AKAP5	A-kinase anchoring protein 5	GO:1905751 positive regulation of endosome to plasma membrane protein transport;GO:1905749 regulation of endosome to plasma membrane protein transport;GO:2001137 positive regulation of endocytic recycling		Predicted intracellular proteins; Transporters:Accessory Factors Involved in Transport	Nucleoplasm (Approved)		(M235)PID TCR CALCIUM PATHWAY; (M113)PID NFAT 3PATHWAY		0.0	0.0	0.0	0.0	0.0	0.0	0.0	1.0	0.0	0.0	0.0	0.0	0.0	0.0	0.0	0.0	0.0	0.0	0.0	0.0
AKAP8L	26993	symbol	H. sapiens	26993	H. sapiens	AKAP8L	A-kinase anchoring protein 8 like	GO:0010793 regulation of mRNA export from nucleus;GO:2000197 regulation of ribonucleoprotein complex localization;GO:0051081 nuclear membrane disassembly		Predicted intracellular proteins	Nuclear speckles (Supported)				1.0	0.0	0.0	0.0	0.0	0.0	0.0	0.0	0.0	0.0	0.0	0.0	0.0	0.0	0.0	0.0	0.0	0.0	0.0	0.0
AKIP1	56672	symbol	H. sapiens	56672	H. sapiens	AKIP1	A-kinase interacting protein 1	GO:0034446 substrate adhesion-dependent cell spreading;GO:1901222 regulation of NIK/NF-kappaB signaling;GO:0038061 NIK/NF-kappaB signaling		Predicted intracellular proteins	Nucleoplasm (Supported)				0.0	0.0	0.0	0.0	0.0	0.0	0.0	0.0	0.0	0.0	1.0	0.0	0.0	0.0	0.0	0.0	0.0	0.0	0.0	0.0
AKR1A1	10327	symbol	H. sapiens	10327	H. sapiens	AKR1A1	aldo-keto reductase family 1 member A1	GO:0042839 D-glucuronate metabolic process;GO:0042840 D-glucuronate catabolic process;GO:0019853 L-ascorbic acid biosynthetic process		Predicted intracellular proteins; Enzymes; ENZYME proteins:Oxidoreductases	Cytosol (Supported); Additional: Nucleoplasm	Tolrestat; Nicotinamide adenine dinucleotide phosphate; Copper		(M5937)HALLMARK GLYCOLYSIS	0.0	0.0	0.0	0.0	0.0	0.0	0.0	0.0	0.0	0.0	0.0	0.0	0.0	0.0	0.0	0.0	0.0	0.0	0.0	0.0
ALG12	79087	symbol	H. sapiens	79087	H. sapiens	ALG12	ALG12 alpha-1,6-mannosyltransferase	GO:0006488 dolichol-linked oligosaccharide biosynthetic process;GO:0006490 oligosaccharide-lipid intermediate biosynthetic process;GO:0097502 mannosylation		ENZYME proteins:Transferases; Potential drug targets; Enzymes; Disease related genes	Endoplasmic reticulum (Approved)				0.0	0.0	0.0	0.0	0.0	0.0	0.0	0.0	0.0	0.0	0.0	0.0	0.0	0.0	0.0	0.0	0.0	0.0	0.0	0.0
ALKBH2	121642	symbol	H. sapiens	121642	H. sapiens	ALKBH2	alkB homolog 2, alpha-ketoglutarate dependent dioxygenase	GO:0035511 oxidative DNA demethylation;GO:0006307 DNA dealkylation involved in DNA repair;GO:0070989 oxidative demethylation		Predicted intracellular proteins; Enzymes; ENZYME proteins:Oxidoreductases	Nucleoplasm (Enhanced)	Ascorbic acid			1.0	0.0	0.0	0.0	0.0	0.0	0.0	0.0	0.0	0.0	0.0	0.0	0.0	0.0	0.0	0.0	0.0	0.0	0.0	0.0
ALPL	249	symbol	H. sapiens	249	H. sapiens	ALPL	alkaline phosphatase, biomineralization associated	GO:0071529 cementum mineralization;GO:0001958 endochondral ossification;GO:0036075 replacement ossification		Cancer-related genes:Candidate cancer biomarkers; Predicted intracellular proteins; ENZYME proteins:Hydrolases; Enzymes; Disease related genes; Potential drug targets	Cytosol (Approved)	Mersalyl			0.0	0.0	0.0	0.0	0.0	0.0	0.0	0.0	0.0	0.0	0.0	1.0	0.0	0.0	1.0	0.0	0.0	0.0	0.0	0.0
ALX4	60529	symbol	H. sapiens	60529	H. sapiens	ALX4	ALX homeobox 4	GO:0035116 embryonic hindlimb morphogenesis;GO:0035115 embryonic forelimb morphogenesis;GO:0035137 hindlimb morphogenesis		Predicted intracellular proteins; Disease related genes; Transcription factors:Helix-turn-helix domains	Nucleoplasm (Supported)				0.0	0.0	0.0	0.0	1.0	0.0	0.0	0.0	1.0	0.0	0.0	1.0	0.0	0.0	0.0	0.0	0.0	0.0	0.0	0.0
AMIGO3	386724	symbol	H. sapiens	386724	H. sapiens	AMIGO3	adhesion molecule with Ig like domain 3	GO:0007157 heterophilic cell-cell adhesion via plasma membrane cell adhesion molecules;GO:0051965 positive regulation of synapse assembly;GO:0051963 regulation of synapse assembly							0.0	0.0	0.0	0.0	0.0	0.0	0.0	0.0	0.0	1.0	1.0	0.0	0.0	0.0	0.0	0.0	0.0	0.0	0.0	0.0
AMOTL2	51421	symbol	H. sapiens	51421	H. sapiens	AMOTL2	angiomotin like 2	GO:0003365 establishment of cell polarity involved in ameboidal cell migration;GO:0035329 hippo signaling;GO:0030010 establishment of cell polarity		Predicted intracellular proteins	Cell Junctions (Approved)				0.0	0.0	0.0	0.0	0.0	0.0	0.0	0.0	0.0	0.0	0.0	0.0	0.0	1.0	0.0	0.0	0.0	0.0	0.0	0.0
AMPD2	271	symbol	H. sapiens	271	H. sapiens	AMPD2	adenosine monophosphate deaminase 2	GO:0032264 IMP salvage;GO:0106380 purine ribonucleotide salvage;GO:0032261 purine nucleotide salvage		Predicted intracellular proteins; ENZYME proteins:Hydrolases; Enzymes; Disease related genes; Potential drug targets	Cytosol (Enhanced)				0.0	0.0	0.0	0.0	0.0	0.0	0.0	0.0	0.0	0.0	0.0	0.0	0.0	0.0	0.0	0.0	0.0	0.0	0.0	0.0
AMZ1	155185	symbol	H. sapiens	155185	H. sapiens	AMZ1	archaelysin family metallopeptidase 1	GO:0006508 proteolysis;GO:0019538 protein metabolic process;GO:1901564 organonitrogen compound metabolic process		Predicted intracellular proteins; Enzymes; Peptidases:Metallopeptidases					0.0	0.0	0.0	0.0	0.0	0.0	0.0	0.0	0.0	0.0	0.0	0.0	0.0	0.0	0.0	0.0	0.0	0.0	0.0	0.0
ANGPTL7	10218	symbol	H. sapiens	10218	H. sapiens	ANGPTL7	angiopoietin like 7	GO:0036331 avascular cornea development in camera-type eye;GO:1901346 negative regulation of vasculature development involved in avascular cornea development in camera-type eye;GO:0061303 cornea development in camera-type eye		Predicted secreted proteins			(M5883)NABA SECRETED FACTORS; (M5885)NABA MATRISOME ASSOCIATED; (M5889)NABA MATRISOME		0.0	0.0	0.0	0.0	0.0	0.0	1.0	0.0	0.0	0.0	0.0	0.0	0.0	1.0	0.0	0.0	0.0	0.0	0.0	0.0
ANK1	286	symbol	H. sapiens	286	H. sapiens	ANK1	ankyrin 1	GO:0035090 maintenance of apical/basal cell polarity;GO:0045199 maintenance of epithelial cell apical/basal polarity;GO:0030011 maintenance of cell polarity		Predicted intracellular proteins; Potential drug targets; Disease related genes; Transporters:Accessory Factors Involved in Transport				(M5945)HALLMARK HEME METABOLISM	0.0	0.0	0.0	0.0	0.0	0.0	0.0	1.0	0.0	0.0	0.0	0.0	0.0	0.0	0.0	0.0	0.0	0.0	0.0	0.0
ANK3	288	symbol	H. sapiens	288	H. sapiens	ANK3	ankyrin 3	GO:1900827 positive regulation of membrane depolarization during cardiac muscle cell action potential;GO:0072658 maintenance of protein location in membrane;GO:0072660 maintenance of protein location in plasma membrane		Cancer-related genes:Mutated cancer genes; Predicted intracellular proteins; Disease related genes	Plasma membrane (Supported)				0.0	0.0	0.0	0.0	0.0	0.0	0.0	1.0	0.0	0.0	1.0	0.0	0.0	0.0	0.0	0.0	0.0	0.0	0.0	0.0
ANKRD13D	338692	symbol	H. sapiens	338692	H. sapiens	ANKRD13D	ankyrin repeat domain 13D	GO:0002091 negative regulation of receptor internalization;GO:0048261 negative regulation of receptor-mediated endocytosis;GO:0045806 negative regulation of endocytosis		Predicted intracellular proteins	Nucleoplasm (Approved); Additional: Mitochondria				0.0	0.0	0.0	0.0	0.0	0.0	0.0	0.0	0.0	0.0	0.0	0.0	0.0	0.0	0.0	0.0	0.0	0.0	0.0	0.0
ANKRD30BL	554226	symbol	H. sapiens	554226	H. sapiens	ANKRD30BL	ankyrin repeat domain 30B like			Predicted intracellular proteins					0.0	0.0	0.0	0.0	0.0	0.0	0.0	0.0	0.0	0.0	0.0	0.0	0.0	0.0	0.0	0.0	0.0	0.0	0.0	0.0
ANKS1A	23294	symbol	H. sapiens	23294	H. sapiens	ANKS1A	ankyrin repeat and sterile alpha motif domain containing 1A	GO:1901187 regulation of ephrin receptor signaling pathway;GO:0016322 neuron remodeling;GO:0006929 substrate-dependent cell migration		Predicted intracellular proteins	Nucleoplasm (Approved); Additional: Cytosol				0.0	0.0	0.0	0.0	0.0	0.0	0.0	0.0	0.0	0.0	0.0	0.0	0.0	0.0	0.0	0.0	1.0	0.0	0.0	0.0
ANXA10	11199	symbol	H. sapiens	11199	H. sapiens	ANXA10	annexin A10			Predicted intracellular proteins	Nucleoli;Nucleoplasm (Approved); Additional: Vesicles		(M5880)NABA ECM AFFILIATED; (M5885)NABA MATRISOME ASSOCIATED; (M5889)NABA MATRISOME	(M5953)HALLMARK KRAS SIGNALING UP	0.0	0.0	0.0	0.0	0.0	0.0	0.0	0.0	0.0	0.0	0.0	0.0	0.0	0.0	0.0	0.0	0.0	0.0	0.0	0.0
AP2S1	1175	symbol	H. sapiens	1175	H. sapiens	AP2S1	adaptor related protein complex 2 subunit sigma 1	GO:0048268 clathrin coat assembly;GO:0072583 clathrin-dependent endocytosis;GO:0030100 regulation of endocytosis		Predicted intracellular proteins; Disease related genes				(M5910)HALLMARK PROTEIN SECRETION; (M5941)HALLMARK UV RESPONSE UP	1.0	0.0	0.0	0.0	0.0	0.0	0.0	1.0	0.0	0.0	0.0	0.0	0.0	0.0	0.0	0.0	1.0	0.0	0.0	1.0
AP3S2	10239	symbol	H. sapiens	10239	H. sapiens	AP3S2	adaptor related protein complex 3 subunit sigma 2	GO:0048490 anterograde synaptic vesicle transport;GO:0099514 synaptic vesicle cytoskeletal transport;GO:0099517 synaptic vesicle transport along microtubule		Predicted intracellular proteins	Vesicles (Approved)				0.0	0.0	0.0	0.0	0.0	0.0	0.0	0.0	0.0	0.0	0.0	0.0	0.0	0.0	0.0	0.0	0.0	0.0	0.0	0.0
APBA2	321	symbol	H. sapiens	321	H. sapiens	APBA2	amyloid beta precursor protein binding family A member 2	GO:0007268 chemical synaptic transmission;GO:0098916 anterograde trans-synaptic signaling;GO:0099537 trans-synaptic signaling		Predicted intracellular proteins	Golgi apparatus (Enhanced)				0.0	0.0	0.0	0.0	0.0	0.0	0.0	0.0	0.0	0.0	0.0	0.0	0.0	0.0	0.0	0.0	0.0	0.0	0.0	0.0
APC2	10297	symbol	H. sapiens	10297	H. sapiens	APC2	APC regulator of WNT signaling pathway 2	GO:0007026 negative regulation of microtubule depolymerization;GO:0031114 regulation of microtubule depolymerization;GO:0031111 negative regulation of microtubule polymerization or depolymerization		Predicted intracellular proteins; Disease related genes	Cytokinetic bridge;Midbody (Supported); Additional: Cytosol				0.0	0.0	0.0	0.0	0.0	1.0	0.0	0.0	0.0	0.0	0.0	0.0	0.0	0.0	0.0	1.0	0.0	0.0	1.0	0.0
APOA1BP	128240	gene_synonym	H. sapiens	128240	H. sapiens	NAXE	NAD(P)HX epimerase	GO:0031580 membrane raft distribution;GO:0051665 membrane raft localization;GO:0031579 membrane raft organization		ENZYME proteins:Isomerase; Predicted secreted proteins; Enzymes; Disease related genes; Potential drug targets	Nucleoplasm (Approved); Additional: Cytosol;Vesicles				0.0	0.0	0.0	0.0	0.0	0.0	0.0	0.0	0.0	0.0	0.0	0.0	0.0	1.0	0.0	0.0	0.0	0.0	0.0	0.0
AQP3	360	symbol	H. sapiens	360	H. sapiens	AQP3	aquaporin 3 (Gill blood group)	GO:0070295 renal water absorption;GO:0003097 renal water transport;GO:0015793 glycerol transport		Blood group antigen proteins	Plasma membrane (Supported); Additional: Nucleoplasm	Sennosides	(M232)PID ECADHERIN STABILIZATION PATHWAY	(M5941)HALLMARK UV RESPONSE UP; (M5906)HALLMARK ESTROGEN RESPONSE EARLY; (M5945)HALLMARK HEME METABOLISM	0.0	0.0	0.0	0.0	0.0	0.0	0.0	0.0	0.0	0.0	0.0	0.0	0.0	0.0	0.0	0.0	0.0	0.0	0.0	0.0
ARHGAP4	393	symbol	H. sapiens	393	H. sapiens	ARHGAP4	Rho GTPase activating protein 4	GO:0010764 negative regulation of fibroblast migration;GO:0010762 regulation of fibroblast migration;GO:0030517 negative regulation of axon extension		Predicted intracellular proteins	Focal adhesion sites (Approved); Additional: Nucleoplasm		(M5193)SIG CHEMOTAXIS; (M68)PID RHOA REG PATHWAY	(M5893)HALLMARK MITOTIC SPINDLE	1.0	0.0	0.0	1.0	0.0	0.0	0.0	0.0	0.0	0.0	1.0	0.0	0.0	1.0	0.0	0.0	0.0	0.0	0.0	0.0
ARHGEF16	27237	symbol	H. sapiens	27237	H. sapiens	ARHGEF16	Rho guanine nucleotide exchange factor 16	GO:1903078 positive regulation of protein localization to plasma membrane;GO:1904377 positive regulation of protein localization to cell periphery;GO:1903076 regulation of protein localization to plasma membrane		Predicted intracellular proteins					1.0	0.0	0.0	0.0	0.0	0.0	0.0	0.0	0.0	0.0	1.0	0.0	0.0	0.0	0.0	0.0	0.0	0.0	0.0	0.0
ARHGEF17	9828	symbol	H. sapiens	9828	H. sapiens	ARHGEF17	Rho guanine nucleotide exchange factor 17	GO:0051056 regulation of small GTPase mediated signal transduction;GO:0007264 small GTPase mediated signal transduction;GO:0030036 actin cytoskeleton organization		Predicted intracellular proteins	Cytosol (Approved)		(M68)PID RHOA REG PATHWAY		1.0	0.0	0.0	0.0	0.0	0.0	0.0	0.0	0.0	0.0	0.0	0.0	0.0	0.0	0.0	0.0	0.0	0.0	0.0	0.0
ARHGEF18	23370	symbol	H. sapiens	23370	H. sapiens	ARHGEF18	Rho/Rac guanine nucleotide exchange factor 18	GO:0150105 protein localization to cell-cell junction;GO:0051497 negative regulation of stress fiber assembly;GO:0032232 negative regulation of actin filament bundle assembly		Predicted intracellular proteins; Disease related genes	Cytosol (Enhanced)		(M68)PID RHOA REG PATHWAY		1.0	0.0	0.0	0.0	0.0	0.0	0.0	0.0	0.0	0.0	0.0	0.0	0.0	0.0	0.0	0.0	0.0	0.0	0.0	0.0
ARL17A	51326	symbol	H. sapiens	51326	H. sapiens	ARL17A	ADP ribosylation factor like GTPase 17A			Predicted intracellular proteins					0.0	0.0	0.0	0.0	0.0	0.0	0.0	0.0	0.0	0.0	0.0	0.0	0.0	0.0	0.0	0.0	0.0	0.0	0.0	0.0
ARSE	415	gene_synonym	H. sapiens	415	H. sapiens	ARSL	arylsulfatase L	GO:0001501 skeletal system development;GO:0048731 system development;GO:0007275 multicellular organism development		Predicted intracellular proteins; Disease related genes	Golgi apparatus (Supported)				0.0	0.0	0.0	0.0	0.0	0.0	0.0	0.0	0.0	0.0	0.0	1.0	0.0	0.0	0.0	0.0	0.0	0.0	0.0	0.0
ARSI	340075	symbol	H. sapiens	340075	H. sapiens	ARSI	arylsulfatase family member I			Predicted intracellular proteins; Predicted secreted proteins	Golgi apparatus (Approved)				0.0	0.0	0.0	0.0	0.0	0.0	0.0	0.0	0.0	0.0	0.0	0.0	0.0	0.0	0.0	0.0	0.0	0.0	0.0	0.0
ARSJ	79642	symbol	H. sapiens	79642	H. sapiens	ARSJ	arylsulfatase family member J			Predicted intracellular proteins; Predicted secreted proteins	Actin filaments (Enhanced)				0.0	0.0	0.0	0.0	0.0	0.0	0.0	0.0	0.0	0.0	0.0	0.0	0.0	0.0	0.0	0.0	0.0	0.0	0.0	0.0
ARVCF	421	symbol	H. sapiens	421	H. sapiens	ARVCF	ARVCF delta catenin family member	GO:0016339 calcium-dependent cell-cell adhesion via plasma membrane cell adhesion molecules;GO:0007043 cell-cell junction assembly;GO:0045216 cell-cell junction organization		Predicted intracellular proteins	Cell Junctions;Plasma membrane (Enhanced)				1.0	0.0	0.0	0.0	0.0	0.0	0.0	0.0	0.0	0.0	0.0	0.0	0.0	0.0	0.0	0.0	0.0	0.0	0.0	0.0
AS3MT	57412	symbol	H. sapiens	57412	H. sapiens	AS3MT	arsenite methyltransferase	GO:0018872 arsonoacetate metabolic process;GO:0009404 toxin metabolic process;GO:0019748 secondary metabolic process		ENZYME proteins:Transferases; Predicted intracellular proteins; Enzymes	Mitochondria (Approved)	Ademetionine			0.0	0.0	0.0	0.0	0.0	0.0	0.0	0.0	0.0	0.0	0.0	0.0	0.0	0.0	0.0	0.0	0.0	0.0	0.0	0.0
ASB2	51676	symbol	H. sapiens	51676	H. sapiens	ASB2	ankyrin repeat and SOCS box containing 2	GO:0071800 podosome assembly;GO:0036336 dendritic cell migration;GO:0001947 heart looping		Predicted intracellular proteins	Nucleoli fibrillar center (Approved); Additional: Cytosol;Nucleoplasm				0.0	0.0	0.0	0.0	1.0	0.0	0.0	0.0	1.0	0.0	0.0	0.0	0.0	0.0	0.0	0.0	0.0	0.0	0.0	1.0
ASH1L-AS1	645676	symbol	H. sapiens	645676	H. sapiens	ASH1L-AS1	ASH1L antisense RNA 1								0.0	0.0	0.0	0.0	0.0	0.0	0.0	0.0	0.0	0.0	0.0	0.0	0.0	0.0	0.0	0.0	0.0	0.0	0.0	0.0
ASPSCR1	79058	symbol	H. sapiens	79058	H. sapiens	ASPSCR1	ASPSCR1 tether for SLC2A4, UBX domain containing	GO:0046324 regulation of glucose import;GO:0046323 glucose import;GO:0010827 regulation of glucose transmembrane transport		Predicted intracellular proteins; Disease related genes; Cancer-related genes	Nucleoplasm (Supported); Additional: Plasma membrane;Vesicles				0.0	0.0	1.0	0.0	0.0	0.0	0.0	0.0	0.0	0.0	0.0	0.0	0.0	0.0	0.0	0.0	0.0	0.0	0.0	0.0
ASRGL1	80150	symbol	H. sapiens	80150	H. sapiens	ASRGL1	asparaginase and isoaspartyl peptidase 1	GO:0006530 asparagine catabolic process;GO:0033345 asparagine catabolic process via L-aspartate;GO:0006528 asparagine metabolic process		Predicted intracellular proteins; ENZYME proteins:Hydrolases; Enzymes	Microtubules (Approved); Additional: Cytokinetic bridge;Nucleoplasm	Aspartic acid; Asparagine			0.0	0.0	0.0	0.0	0.0	0.0	0.0	1.0	0.0	0.0	0.0	0.0	0.0	0.0	0.0	0.0	0.0	0.0	0.0	0.0
ATF3	467	symbol	H. sapiens	467	H. sapiens	ATF3	activating transcription factor 3	GO:0061394 regulation of transcription from RNA polymerase II promoter in response to arsenic-containing substance;GO:1903984 positive regulation of TRAIL-activated apoptotic signaling pathway;GO:1903121 regulation of TRAIL-activated apoptotic signaling pathway		Predicted intracellular proteins; Transcription factors:Basic domains	Nucleoli;Nucleoplasm (Supported)		(M166)PID ATF2 PATHWAY; (M167)PID AP1 PATHWAY; (M2)PID SMAD2 3NUCLEAR PATHWAY	(M5892)HALLMARK CHOLESTEROL HOMEOSTASIS; (M5922)HALLMARK UNFOLDED PROTEIN RESPONSE; (M5941)HALLMARK UV RESPONSE UP	1.0	0.0	0.0	0.0	0.0	1.0	0.0	1.0	1.0	0.0	0.0	0.0	0.0	0.0	0.0	1.0	0.0	0.0	0.0	0.0
ATG4D	84971	symbol	H. sapiens	84971	H. sapiens	ATG4D	autophagy related 4D cysteine peptidase	GO:0006914 autophagy;GO:0061919 process utilizing autophagic mechanism;GO:0015031 protein transport		Predicted intracellular proteins; Peptidases:Cysteine-type peptidases; Transporters; Enzymes	Mitochondria;Nucleoplasm (Supported)				0.0	0.0	0.0	0.0	0.0	0.0	0.0	0.0	0.0	0.0	0.0	0.0	0.0	0.0	0.0	0.0	0.0	0.0	0.0	0.0
ATP5E	514	gene_synonym	H. sapiens	514	H. sapiens	ATP5F1E	ATP synthase F1 subunit epsilon	GO:0042776 mitochondrial ATP synthesis coupled proton transport;GO:0015985 energy coupled proton transport, down electrochemical gradient;GO:0015986 ATP synthesis coupled proton transport		Predicted intracellular proteins; Disease related genes				(M5936)HALLMARK OXIDATIVE PHOSPHORYLATION	0.0	0.0	0.0	0.0	0.0	0.0	0.0	0.0	0.0	0.0	0.0	0.0	0.0	0.0	0.0	0.0	0.0	0.0	0.0	0.0
ATP5I	521	gene_synonym	H. sapiens	521	H. sapiens	ATP5ME	ATP synthase membrane subunit e	GO:0042776 mitochondrial ATP synthesis coupled proton transport;GO:0015985 energy coupled proton transport, down electrochemical gradient;GO:0015986 ATP synthesis coupled proton transport		Predicted intracellular proteins	Mitochondria (Supported)	Phenethyl Isothiocyanate		(M5936)HALLMARK OXIDATIVE PHOSPHORYLATION	0.0	0.0	0.0	0.0	0.0	0.0	0.0	0.0	0.0	0.0	0.0	0.0	0.0	0.0	0.0	0.0	0.0	0.0	0.0	0.0
ATP6V0E2	155066	symbol	H. sapiens	155066	H. sapiens	ATP6V0E2	ATPase H+ transporting V0 subunit e2	GO:0007035 vacuolar acidification;GO:0051452 intracellular pH reduction;GO:0045851 pH reduction							1.0	0.0	0.0	0.0	0.0	0.0	0.0	1.0	0.0	0.0	0.0	0.0	0.0	0.0	0.0	0.0	1.0	0.0	0.0	0.0
ATP6V1F	9296	symbol	H. sapiens	9296	H. sapiens	ATP6V1F	ATPase H+ transporting V1 subunit F	GO:1902600 proton transmembrane transport;GO:0098662 inorganic cation transmembrane transport;GO:0098660 inorganic ion transmembrane transport		Predicted intracellular proteins; Transporters:Primary Active Transporters				(M5941)HALLMARK UV RESPONSE UP; (M5936)HALLMARK OXIDATIVE PHOSPHORYLATION	1.0	0.0	0.0	0.0	0.0	0.0	0.0	1.0	0.0	0.0	0.0	0.0	0.0	0.0	0.0	1.0	1.0	0.0	0.0	0.0
ATXN7L2	127002	symbol	H. sapiens	127002	H. sapiens	ATXN7L2	ataxin 7 like 2			Predicted intracellular proteins	Nucleoli rim (Approved); Additional: Cytosol;Vesicles				0.0	0.0	0.0	0.0	0.0	0.0	0.0	0.0	0.0	0.0	0.0	0.0	0.0	0.0	0.0	0.0	0.0	0.0	0.0	0.0
AXIN1	8312	symbol	H. sapiens	8312	H. sapiens	AXIN1	axin 1	GO:0010800 positive regulation of peptidyl-threonine phosphorylation;GO:0051443 positive regulation of ubiquitin-protein transferase activity;GO:0010799 regulation of peptidyl-threonine phosphorylation		Predicted intracellular proteins; Disease related genes; Cancer-related genes	Nucleoli;Vesicles (Supported)	1,4-Dithiothreitol	(M31)PID BETA CATENIN DEG PATHWAY; (M90)PID WNT CANONICAL PATHWAY; (M139)PID MYC PATHWAY	(M5895)HALLMARK WNT BETA CATENIN SIGNALING	1.0	1.0	0.0	0.0	0.0	1.0	0.0	0.0	0.0	0.0	0.0	0.0	1.0	0.0	0.0	1.0	0.0	0.0	1.0	1.0
B3GALT6	126792	symbol	H. sapiens	126792	H. sapiens	B3GALT6	beta-1,3-galactosyltransferase 6	GO:0030206 chondroitin sulfate biosynthetic process;GO:0050650 chondroitin sulfate proteoglycan biosynthetic process;GO:0015012 heparan sulfate proteoglycan biosynthetic process		ENZYME proteins:Transferases; Predicted intracellular proteins; Enzymes; Disease related genes; Potential drug targets				(M5891)HALLMARK HYPOXIA; (M5937)HALLMARK GLYCOLYSIS	0.0	0.0	0.0	0.0	0.0	0.0	0.0	0.0	0.0	0.0	0.0	0.0	0.0	0.0	0.0	0.0	0.0	0.0	0.0	0.0
B4GALNT4	338707	symbol	H. sapiens	338707	H. sapiens	B4GALNT4	beta-1,4-N-acetyl-galactosaminyltransferase 4			ENZYME proteins:Transferases; Predicted intracellular proteins; Enzymes	Cytosol;Nucleoplasm (Uncertain); Additional: Vesicles				0.0	0.0	0.0	0.0	0.0	0.0	0.0	0.0	0.0	0.0	0.0	0.0	0.0	0.0	0.0	0.0	0.0	0.0	0.0	0.0
B4GALT3	8703	symbol	H. sapiens	8703	H. sapiens	B4GALT3	beta-1,4-galactosyltransferase 3	GO:0006682 galactosylceramide biosynthetic process;GO:0019375 galactolipid biosynthetic process;GO:0006681 galactosylceramide metabolic process		ENZYME proteins:Transferases; Predicted intracellular proteins; Enzymes	Golgi apparatus (Supported); Additional: Cytosol				0.0	0.0	0.0	0.0	0.0	0.0	0.0	0.0	0.0	0.0	0.0	0.0	0.0	0.0	0.0	0.0	0.0	0.0	0.0	0.0
B4GALT7	11285	symbol	H. sapiens	11285	H. sapiens	B4GALT7	beta-1,4-galactosyltransferase 7	GO:0048147 negative regulation of fibroblast proliferation;GO:0030166 proteoglycan biosynthetic process;GO:0006487 protein N-linked glycosylation		ENZYME proteins:Transferases; Predicted intracellular proteins; Enzymes; Disease related genes; Potential drug targets				(M5937)HALLMARK GLYCOLYSIS	0.0	0.0	0.0	0.0	0.0	0.0	0.0	0.0	0.0	0.0	0.0	0.0	0.0	0.0	0.0	0.0	0.0	0.0	0.0	0.0
BAIAP3	8938	symbol	H. sapiens	8938	H. sapiens	BAIAP3	BAI1 associated protein 3	GO:1905413 regulation of dense core granule exocytosis;GO:1990502 dense core granule maturation;GO:0061792 secretory granule maturation		Predicted intracellular proteins					0.0	0.0	1.0	0.0	0.0	0.0	0.0	0.0	0.0	0.0	0.0	0.0	0.0	0.0	0.0	0.0	0.0	0.0	0.0	0.0
BATF3	55509	symbol	H. sapiens	55509	H. sapiens	BATF3	basic leucine zipper ATF-like transcription factor 3	GO:0043011 myeloid dendritic cell differentiation;GO:0001773 myeloid dendritic cell activation;GO:0097028 dendritic cell differentiation		Predicted intracellular proteins; Transcription factors:Basic domains	Nucleoli (Supported); Additional: Cytosol;Nucleoplasm		(M235)PID TCR CALCIUM PATHWAY; (M60)PID NFAT TFPATHWAY	(M5947)HALLMARK IL2 STAT5 SIGNALING	1.0	0.0	0.0	0.0	0.0	0.0	0.0	0.0	0.0	0.0	0.0	0.0	0.0	0.0	0.0	0.0	0.0	0.0	0.0	0.0
BCAM	4059	symbol	H. sapiens	4059	H. sapiens	BCAM	basal cell adhesion molecule (Lutheran blood group)	GO:0007160 cell-matrix adhesion;GO:0031589 cell-substrate adhesion;GO:0007155 cell adhesion		Predicted intracellular proteins; Blood group antigen proteins; CD markers	Nucleoli fibrillar center (Approved)			(M5898)HALLMARK DNA REPAIR; (M5945)HALLMARK HEME METABOLISM	0.0	0.0	0.0	0.0	0.0	0.0	0.0	0.0	0.0	0.0	0.0	0.0	0.0	0.0	0.0	0.0	0.0	0.0	0.0	0.0
BCAS4	55653	symbol	H. sapiens	55653	H. sapiens	BCAS4	breast carcinoma amplified sequence 4			Predicted intracellular proteins; Disease related genes	Cytosol;Intermediate filaments (Approved)				0.0	0.0	0.0	0.0	0.0	0.0	0.0	0.0	0.0	0.0	0.0	0.0	0.0	0.0	0.0	0.0	0.0	0.0	0.0	0.0
BCL11A	53335	symbol	H. sapiens	53335	H. sapiens	BCL11A	BAF chromatin remodeling complex subunit BCL11A	GO:1904799 regulation of neuron remodeling;GO:1904800 negative regulation of neuron remodeling;GO:2000173 negative regulation of branching morphogenesis of a nerve		Cancer-related genes:Candidate cancer biomarkers; Transcription factors:Zinc-coordinating DNA-binding domains; Disease related genes; Predicted intracellular proteins	Nucleoplasm (Supported); Additional: Nuclear bodies				0.0	0.0	0.0	1.0	0.0	0.0	0.0	0.0	0.0	0.0	1.0	0.0	0.0	0.0	0.0	0.0	0.0	1.0	0.0	1.0
BEGAIN	57596	symbol	H. sapiens	57596	H. sapiens	BEGAIN	brain enriched guanylate kinase associated	GO:0098962 regulation of postsynaptic neurotransmitter receptor activity;GO:0099601 regulation of neurotransmitter receptor activity;GO:0031644 regulation of nervous system process		Predicted intracellular proteins	Nucleoplasm (Approved); Additional: Cytosol;Golgi apparatus				0.0	0.0	0.0	0.0	0.0	0.0	0.0	0.0	0.0	0.0	0.0	0.0	0.0	0.0	0.0	0.0	0.0	0.0	0.0	0.0
BEND3	57673	symbol	H. sapiens	57673	H. sapiens	BEND3	BEN domain containing 3	GO:0098532 histone H3-K27 trimethylation;GO:0034773 histone H4-K20 trimethylation;GO:0000183 rDNA heterochromatin assembly		Predicted intracellular proteins	Nucleoplasm (Approved)				1.0	1.0	0.0	0.0	0.0	0.0	0.0	0.0	0.0	0.0	0.0	0.0	0.0	0.0	0.0	0.0	0.0	0.0	0.0	0.0
BIN1	274	symbol	H. sapiens	274	H. sapiens	BIN1	bridging integrator 1	GO:0106135 negative regulation of cardiac muscle cell contraction;GO:1903946 negative regulation of ventricular cardiac muscle cell action potential;GO:1902960 negative regulation of aspartic-type endopeptidase activity involved in amyloid precursor protein catabolic process		Predicted intracellular proteins; Disease related genes	Cytosol (Supported)		(M67)PID ARF6 TRAFFICKING PATHWAY; (M19)PID P73PATHWAY	(M5893)HALLMARK MITOTIC SPINDLE; (M5909)HALLMARK MYOGENESIS	0.0	0.0	0.0	0.0	0.0	0.0	0.0	0.0	1.0	0.0	1.0	0.0	0.0	0.0	0.0	0.0	0.0	0.0	0.0	0.0
BLID	414899	symbol	H. sapiens	414899	H. sapiens	BLID	BH3-like motif containing, cell death inducer	GO:0043280 positive regulation of cysteine-type endopeptidase activity involved in apoptotic process;GO:2001056 positive regulation of cysteine-type endopeptidase activity;GO:0010950 positive regulation of endopeptidase activity		Predicted intracellular proteins					0.0	0.0	0.0	0.0	0.0	0.0	0.0	0.0	0.0	0.0	0.0	0.0	0.0	0.0	0.0	0.0	0.0	0.0	0.0	0.0
BMI1	648	symbol	H. sapiens	648	H. sapiens	BMI1	BMI1 proto-oncogene, polycomb ring finger	GO:0009955 adaxial/abaxial pattern specification;GO:2000011 regulation of adaxial/abaxial pattern formation;GO:0033092 positive regulation of immature T cell proliferation in thymus		Cancer-related genes:Candidate cancer biomarkers; Predicted intracellular proteins	Nuclear bodies;Nucleoplasm (Approved); Additional: Cytosol;Nucleoli		(M66)PID MYC ACTIV PATHWAY		1.0	1.0	1.0	0.0	1.0	0.0	0.0	0.0	0.0	1.0	0.0	1.0	0.0	0.0	0.0	1.0	0.0	0.0	0.0	1.0
BMP4	652	symbol	H. sapiens	652	H. sapiens	BMP4	bone morphogenetic protein 4	GO:0003277 apoptotic process involved in endocardial cushion morphogenesis;GO:0048390 intermediate mesoderm morphogenesis;GO:0048391 intermediate mesoderm formation		Cancer-related genes:Candidate cancer biomarkers; Predicted intracellular proteins; Predicted secreted proteins; Disease related genes		Calcium	(M181)PID BMP PATHWAY; (M5883)NABA SECRETED FACTORS; (M5885)NABA MATRISOME ASSOCIATED		1.0	0.0	1.0	1.0	1.0	1.0	1.0	0.0	1.0	1.0	1.0	1.0	1.0	1.0	1.0	1.0	0.0	1.0	1.0	0.0
BMP8B	656	symbol	H. sapiens	656	H. sapiens	BMP8B	bone morphogenetic protein 8b	GO:0010862 positive regulation of pathway-restricted SMAD protein phosphorylation;GO:0060393 regulation of pathway-restricted SMAD protein phosphorylation;GO:0060389 pathway-restricted SMAD protein phosphorylation		Predicted secreted proteins			(M5883)NABA SECRETED FACTORS; (M5885)NABA MATRISOME ASSOCIATED; (M5889)NABA MATRISOME		0.0	0.0	0.0	0.0	0.0	0.0	0.0	0.0	0.0	0.0	0.0	1.0	0.0	0.0	1.0	1.0	0.0	0.0	0.0	0.0
BOLA3-AS1	100507171	symbol	H. sapiens	100507171	H. sapiens	BOLA3-AS1	BOLA3 divergent transcript								0.0	0.0	0.0	0.0	0.0	0.0	0.0	0.0	0.0	0.0	0.0	0.0	0.0	0.0	0.0	0.0	0.0	0.0	0.0	0.0
BRSK1	84446	symbol	H. sapiens	84446	H. sapiens	BRSK1	BR serine/threonine kinase 1	GO:0090176 microtubule cytoskeleton organization involved in establishment of planar polarity;GO:2000807 regulation of synaptic vesicle clustering;GO:0097091 synaptic vesicle clustering	CAMK Ser/Thr protein kinase family	ENZYME proteins:Transferases; Kinases:CAMK Ser/Thr protein kinases; Enzymes; Predicted intracellular proteins	Nucleoplasm (Supported); Additional: Cell Junctions		(M87)PID LKB1 PATHWAY		0.0	0.0	0.0	0.0	1.0	0.0	0.0	0.0	0.0	0.0	1.0	0.0	0.0	0.0	0.0	0.0	0.0	0.0	0.0	0.0
BSCL2	26580	symbol	H. sapiens	26580	H. sapiens	BSCL2	BSCL2 lipid droplet biogenesis associated, seipin	GO:0140042 lipid droplet formation;GO:0050995 negative regulation of lipid catabolic process;GO:0034389 lipid droplet organization		Predicted intracellular proteins; Disease related genes					0.0	0.0	0.0	0.0	0.0	0.0	0.0	0.0	0.0	0.0	0.0	0.0	0.0	0.0	0.0	0.0	0.0	0.0	0.0	0.0
C10orf67	256815	symbol	H. sapiens	256815	H. sapiens	C10orf67	chromosome 10 open reading frame 67			Predicted intracellular proteins	Microtubules;Mitochondria;Vesicles (Approved)				0.0	0.0	0.0	0.0	0.0	0.0	0.0	0.0	0.0	0.0	0.0	0.0	0.0	0.0	0.0	0.0	0.0	0.0	0.0	0.0
C1orf53	388722	symbol	H. sapiens	388722	H. sapiens	C1orf53	chromosome 1 open reading frame 53			Predicted intracellular proteins	Vesicles (Approved); Additional: Aggresome				0.0	0.0	0.0	0.0	0.0	0.0	0.0	0.0	0.0	0.0	0.0	0.0	0.0	0.0	0.0	0.0	0.0	0.0	0.0	0.0
C1QL4	338761	symbol	H. sapiens	338761	H. sapiens	C1QL4	complement C1q like 4	GO:0048147 negative regulation of fibroblast proliferation;GO:0045599 negative regulation of fat cell differentiation;GO:0070373 negative regulation of ERK1 and ERK2 cascade		Predicted secreted proteins			(M5880)NABA ECM AFFILIATED; (M5885)NABA MATRISOME ASSOCIATED; (M5889)NABA MATRISOME		0.0	0.0	0.0	1.0	0.0	0.0	0.0	0.0	0.0	0.0	0.0	0.0	0.0	0.0	0.0	0.0	0.0	0.0	0.0	0.0
C21orf33	8209	gene_synonym	H. sapiens	8209	H. sapiens	GATD3	glutamine amidotransferase class 1 domain containing 3			Predicted intracellular proteins	Mitochondria (Approved); Additional: Centrosome				0.0	0.0	0.0	0.0	0.0	0.0	0.0	0.0	0.0	0.0	0.0	0.0	0.0	0.0	0.0	0.0	0.0	0.0	1.0	0.0
C6orf223	221416	symbol	H. sapiens	221416	H. sapiens	C6orf223	chromosome 6 open reading frame 223			Predicted intracellular proteins	Nucleoli fibrillar center (Approved)				0.0	0.0	0.0	0.0	0.0	0.0	0.0	0.0	0.0	0.0	0.0	0.0	0.0	0.0	0.0	0.0	0.0	0.0	0.0	0.0
C8orf82	414919	symbol	H. sapiens	414919	H. sapiens	C8orf82	chromosome 8 open reading frame 82			Predicted intracellular proteins	Nucleoplasm (Approved)				0.0	0.0	0.0	0.0	0.0	0.0	0.0	0.0	0.0	0.0	0.0	0.0	0.0	0.0	0.0	0.0	0.0	0.0	0.0	0.0
C9orf89	84270	gene_synonym	H. sapiens	84270	H. sapiens	CARD19	caspase recruitment domain family member 19	GO:0043124 negative regulation of I-kappaB kinase/NF-kappaB signaling;GO:0043122 regulation of I-kappaB kinase/NF-kappaB signaling;GO:0007249 I-kappaB kinase/NF-kappaB signaling			Mitochondria (Supported)				0.0	0.0	0.0	0.0	0.0	0.0	0.0	0.0	0.0	0.0	0.0	0.0	0.0	0.0	0.0	0.0	0.0	0.0	0.0	0.0
CABP1	9478	symbol	H. sapiens	9478	H. sapiens	CABP1	calcium binding protein 1	GO:0042308 negative regulation of protein import into nucleus;GO:1904590 negative regulation of protein import;GO:0046823 negative regulation of nucleocytoplasmic transport		Predicted intracellular proteins					0.0	0.0	0.0	0.0	0.0	0.0	0.0	0.0	0.0	0.0	0.0	0.0	0.0	0.0	0.0	0.0	0.0	0.0	0.0	0.0
CACNA1H	8912	symbol	H. sapiens	8912	H. sapiens	CACNA1H	calcium voltage-gated channel subunit alpha1 H	GO:0032342 aldosterone biosynthetic process;GO:0034651 cortisol biosynthetic process;GO:1902645 tertiary alcohol biosynthetic process		Transporters:Transporter channels and pores; FDA approved drug targets:Small molecule drugs; Disease related genes; Voltage-gated ion channels:Voltage-Gated Calcium Channels	Nucleoplasm;Vesicles (Approved)	Isradipine; Cinnarizine; Verapamil; Zonisamide; Felodipine; Nitrendipine; Bepridil; Mibefradil; Flunarizine; Cannabidiol; Medical Cannabis; Nabiximols		(M5909)HALLMARK MYOGENESIS; (M5937)HALLMARK GLYCOLYSIS	0.0	0.0	0.0	0.0	0.0	0.0	0.0	1.0	1.0	0.0	0.0	0.0	0.0	0.0	0.0	0.0	0.0	0.0	0.0	0.0
CACNA2D3	55799	symbol	H. sapiens	55799	H. sapiens	CACNA2D3	calcium voltage-gated channel auxiliary subunit alpha2delta 3	GO:0070588 calcium ion transmembrane transport;GO:0006816 calcium ion transport;GO:0034765 regulation of ion transmembrane transport		Predicted intracellular proteins; Transporters:Accessory Factors Involved in Transport	Nucleoplasm (Uncertain)	Amlodipine; Nilvadipine			0.0	0.0	0.0	0.0	0.0	0.0	0.0	0.0	0.0	0.0	0.0	0.0	0.0	0.0	0.0	0.0	0.0	0.0	0.0	0.0
CACNG8	59283	symbol	H. sapiens	59283	H. sapiens	CACNG8	calcium voltage-gated channel auxiliary subunit gamma 8	GO:0098943 neurotransmitter receptor transport, postsynaptic endosome to lysosome;GO:0098953 receptor diffusion trapping;GO:0098970 postsynaptic neurotransmitter receptor diffusion trapping		Transporters:Accessory Factors Involved in Transport					0.0	0.0	0.0	0.0	0.0	0.0	0.0	0.0	0.0	0.0	0.0	0.0	0.0	0.0	0.0	0.0	0.0	0.0	0.0	0.0
CAND2	23066	symbol	H. sapiens	23066	H. sapiens	CAND2	cullin associated and neddylation dissociated 2 (putative)	GO:0010265 SCF complex assembly;GO:0016567 protein ubiquitination;GO:0032446 protein modification by small protein conjugation		Predicted intracellular proteins	Nuclear bodies (Approved); Additional: Cytosol				0.0	0.0	0.0	0.0	0.0	0.0	0.0	0.0	0.0	0.0	0.0	0.0	0.0	0.0	0.0	0.0	0.0	0.0	0.0	0.0
CARD10	29775	symbol	H. sapiens	29775	H. sapiens	CARD10	caspase recruitment domain family member 10	GO:0007250 activation of NF-kappaB-inducing kinase activity;GO:0090051 negative regulation of cell migration involved in sprouting angiogenesis;GO:0090049 regulation of cell migration involved in sprouting angiogenesis		Predicted intracellular proteins	Intermediate filaments;Vesicles (Approved); Additional: Cytosol				0.0	0.0	0.0	0.0	0.0	0.0	0.0	0.0	0.0	0.0	0.0	0.0	0.0	1.0	0.0	0.0	0.0	0.0	0.0	0.0
CASKIN1	57524	symbol	H. sapiens	57524	H. sapiens	CASKIN1	CASK interacting protein 1	GO:0007165 signal transduction;GO:0023052 signaling;GO:0007154 cell communication		Predicted intracellular proteins	Nucleoplasm (Approved); Additional: Cytosol				0.0	0.0	0.0	0.0	0.0	0.0	0.0	0.0	0.0	0.0	0.0	0.0	0.0	0.0	0.0	0.0	0.0	0.0	0.0	0.0
CBWD5	220869	symbol	H. sapiens	220869	H. sapiens	CBWD5	COBW domain containing 5			Predicted intracellular proteins	Plasma membrane (Approved)				0.0	0.0	0.0	0.0	0.0	0.0	0.0	0.0	0.0	0.0	0.0	0.0	0.0	0.0	0.0	0.0	0.0	0.0	0.0	0.0
CBX2	84733	symbol	H. sapiens	84733	H. sapiens	CBX2	chromobox 2	GO:0045137 development of primary sexual characteristics;GO:0007548 sex differentiation;GO:0006325 chromatin organization		Predicted intracellular proteins; Disease related genes	Nucleoplasm (Supported)				1.0	0.0	0.0	0.0	0.0	0.0	0.0	0.0	0.0	0.0	0.0	0.0	0.0	0.0	0.0	0.0	0.0	0.0	0.0	1.0
CCDC106	29903	symbol	H. sapiens	29903	H. sapiens	CCDC106	coiled-coil domain containing 106			Predicted intracellular proteins	Nucleoplasm (Supported); Additional: Cytosol			(M5956)HALLMARK KRAS SIGNALING DN	0.0	0.0	0.0	0.0	0.0	0.0	0.0	0.0	0.0	0.0	0.0	0.0	0.0	0.0	0.0	0.0	0.0	0.0	0.0	0.0
CCDC28B	79140	symbol	H. sapiens	79140	H. sapiens	CCDC28B	coiled-coil domain containing 28B	GO:0060271 cilium assembly;GO:0044782 cilium organization;GO:0120031 plasma membrane bounded cell projection assembly		Predicted intracellular proteins; Disease related genes					0.0	0.0	0.0	0.0	0.0	0.0	0.0	0.0	0.0	0.0	0.0	0.0	0.0	0.0	0.0	0.0	0.0	0.0	0.0	0.0
CCDC81	60494	symbol	H. sapiens	60494	H. sapiens	CCDC81	coiled-coil domain containing 81			Predicted intracellular proteins					0.0	0.0	0.0	0.0	0.0	0.0	0.0	0.0	0.0	0.0	0.0	0.0	0.0	0.0	0.0	0.0	0.0	0.0	0.0	0.0
CCNJL	79616	symbol	H. sapiens	79616	H. sapiens	CCNJL	cyclin J like	GO:0000079 regulation of cyclin-dependent protein serine/threonine kinase activity;GO:1904029 regulation of cyclin-dependent protein kinase activity;GO:0071900 regulation of protein serine/threonine kinase activity		Predicted intracellular proteins	Nuclear speckles (Approved)				0.0	0.0	0.0	0.0	0.0	0.0	0.0	0.0	0.0	0.0	0.0	0.0	0.0	0.0	0.0	0.0	0.0	0.0	0.0	0.0
CCR10	2826	symbol	H. sapiens	2826	H. sapiens	CCR10	C-C motif chemokine receptor 10	GO:0070098 chemokine-mediated signaling pathway;GO:1990868 response to chemokine;GO:1990869 cellular response to chemokine		Cancer-related genes:Candidate cancer biomarkers; G-protein coupled receptors:Chemokines and chemotactic factors receptors; G-protein coupled receptors:GPCRs excl olfactory receptors	Endoplasmic reticulum (Supported)				0.0	0.0	0.0	0.0	0.0	0.0	0.0	0.0	0.0	0.0	1.0	0.0	0.0	0.0	0.0	0.0	0.0	0.0	0.0	0.0
CD2BP2	10421	symbol	H. sapiens	10421	H. sapiens	CD2BP2	CD2 cytoplasmic tail binding protein 2	GO:0000244 spliceosomal tri-snRNP complex assembly;GO:0000387 spliceosomal snRNP assembly;GO:0022618 ribonucleoprotein complex assembly		Predicted intracellular proteins	Nuclear speckles (Enhanced); Additional: Cytosol				0.0	0.0	0.0	0.0	0.0	0.0	0.0	1.0	0.0	0.0	0.0	0.0	0.0	0.0	0.0	0.0	0.0	0.0	0.0	0.0
CD320	51293	symbol	H. sapiens	51293	H. sapiens	CD320	CD320 molecule	GO:0031296 B cell costimulation;GO:0015889 cobalamin transport;GO:0009235 cobalamin metabolic process		Disease related genes; CD markers	Cytosol (Approved)				0.0	0.0	0.0	0.0	0.0	0.0	0.0	0.0	0.0	0.0	0.0	0.0	0.0	0.0	0.0	0.0	0.0	0.0	0.0	0.0
CD4	920	symbol	H. sapiens	920	H. sapiens	CD4	CD4 molecule	GO:0035397 helper T cell enhancement of adaptive immune response;GO:0006948 induction by virus of host cell-cell fusion;GO:0019054 modulation by virus of host cellular process		Predicted intracellular proteins; CD markers; FDA approved drug targets:Biotech drugs	Plasma membrane (Supported)	Antithymocyte immunoglobulin (rabbit); Clenoliximab; Ibalizumab	(M243)PID ARF 3PATHWAY; (M290)PID IL12 STAT4 PATHWAY; (M196)PID IL23 PATHWAY	(M5950)HALLMARK ALLOGRAFT REJECTION	1.0	0.0	1.0	0.0	0.0	0.0	0.0	0.0	0.0	0.0	0.0	0.0	0.0	0.0	0.0	0.0	1.0	0.0	0.0	1.0
CD70	970	symbol	H. sapiens	970	H. sapiens	CD70	CD70 molecule	GO:0042100 B cell proliferation;GO:0033209 tumor necrosis factor-mediated signaling pathway;GO:0042102 positive regulation of T cell proliferation		Cancer-related genes:Candidate cancer biomarkers; Predicted intracellular proteins; Cancer-related genes:Mutated cancer genes; CD markers	Nucleoplasm (Uncertain)			(M5932)HALLMARK INFLAMMATORY RESPONSE	0.0	0.0	1.0	0.0	0.0	0.0	0.0	0.0	0.0	0.0	0.0	0.0	0.0	0.0	0.0	0.0	0.0	0.0	0.0	1.0
CD93	22918	symbol	H. sapiens	22918	H. sapiens	CD93	CD93 molecule	GO:0042116 macrophage activation;GO:0002274 myeloid leukocyte activation;GO:0006909 phagocytosis		CD markers	Plasma membrane;Vesicles (Approved)				0.0	0.0	0.0	0.0	0.0	0.0	0.0	0.0	0.0	0.0	0.0	0.0	0.0	0.0	0.0	0.0	0.0	0.0	0.0	0.0
CDC26	246184	symbol	H. sapiens	246184	H. sapiens	CDC26	cell division cycle 26	GO:0031145 anaphase-promoting complex-dependent catabolic process;GO:0070979 protein K11-linked ubiquitination;GO:0030071 regulation of mitotic metaphase/anaphase transition		Predicted intracellular proteins	Nucleoplasm (Approved)				1.0	0.0	0.0	0.0	0.0	1.0	0.0	0.0	0.0	0.0	0.0	0.0	0.0	0.0	0.0	0.0	0.0	0.0	0.0	1.0
CDC42EP5	148170	symbol	H. sapiens	148170	H. sapiens	CDC42EP5	CDC42 effector protein 5	GO:0031274 positive regulation of pseudopodium assembly;GO:0031272 regulation of pseudopodium assembly;GO:0031269 pseudopodium assembly		Predicted intracellular proteins					1.0	0.0	0.0	0.0	0.0	0.0	0.0	0.0	0.0	0.0	1.0	0.0	0.0	0.0	0.0	0.0	0.0	0.0	0.0	1.0
CDH3	1001	symbol	H. sapiens	1001	H. sapiens	CDH3	cadherin 3	GO:0051796 negative regulation of timing of catagen;GO:0060901 regulation of hair cycle by canonical Wnt signaling pathway;GO:1902908 regulation of melanosome transport		Predicted intracellular proteins; Disease related genes	Plasma membrane (Supported); Additional: Cell Junctions			(M5915)HALLMARK APICAL JUNCTION	0.0	0.0	0.0	0.0	0.0	0.0	0.0	0.0	0.0	0.0	0.0	0.0	0.0	0.0	0.0	0.0	1.0	0.0	0.0	0.0
CDK6	1021	symbol	H. sapiens	1021	H. sapiens	CDK6	cyclin dependent kinase 6	GO:0045656 negative regulation of monocyte differentiation;GO:0021670 lateral ventricle development;GO:0043696 dedifferentiation	CMGC Ser/Thr protein kinase family	Cancer-related genes:Candidate cancer biomarkers; ENZYME proteins:Transferases; Predicted intracellular proteins; FDA approved drug targets:Small molecule drugs; Enzymes; Disease related genes; Kinases:CMGC Ser/Thr protein kinases	Nucleoplasm (Supported); Additional: Cytosol	Alvocidib; (2S)-2-({6-[(3-Amino-5-chlorophenyl)amino]-9-isopropyl-9H-purin-2-yl}amino)-3-methyl-1-butanol; Fisetin; Palbociclib; Ribociclib; Abemaciclib	(M234)PID IL2 STAT5 PATHWAY; (M58)PID AR PATHWAY; (M279)PID RB 1PATHWAY	(M5919)HALLMARK HEDGEHOG SIGNALING; (M5908)HALLMARK ANDROGEN RESPONSE	1.0	0.0	0.0	1.0	0.0	1.0	0.0	0.0	0.0	1.0	0.0	0.0	0.0	0.0	1.0	1.0	1.0	1.0	1.0	0.0
CDK7	1022	symbol	H. sapiens	1022	H. sapiens	CDK7	cyclin dependent kinase 7	GO:0070816 phosphorylation of RNA polymerase II C-terminal domain;GO:0042795 snRNA transcription by RNA polymerase II;GO:0009301 snRNA transcription	CMGC Ser/Thr protein kinase family	Cancer-related genes:Candidate cancer biomarkers; ENZYME proteins:Transferases; Predicted intracellular proteins; Kinases:CMGC Ser/Thr protein kinases; Enzymes	Nucleoplasm (Supported); Additional: Cytosol;Nucleoli fibrillar center;Plasma membrane	Phosphonothreonine; Alvocidib; SNS-032; Seliciclib	(M10154)SA G2 AND M PHASES; (M207)PID RETINOIC ACID PATHWAY	(M5949)HALLMARK PEROXISOME	1.0	0.0	0.0	0.0	0.0	0.0	0.0	1.0	0.0	0.0	0.0	0.0	0.0	0.0	0.0	0.0	0.0	0.0	0.0	0.0
CDKN2A	1029	symbol	H. sapiens	1029	H. sapiens	CDKN2A	cyclin dependent kinase inhibitor 2A	GO:0035986 senescence-associated heterochromatin focus assembly;GO:2000111 positive regulation of macrophage apoptotic process;GO:0033034 positive regulation of myeloid cell apoptotic process		Cancer-related genes:Candidate cancer biomarkers; Cancer-related genes:Mutated cancer genes; Predicted intracellular proteins; Disease related genes; Cancer-related genes:Mutational cancer driver genes	Nucleoli (Supported)		(M3686)SA REG CASCADE OF CYCLIN EXPR; (M1529)SA G1 AND S PHASES; (M180)PID HIF1A PATHWAY	(M5925)HALLMARK E2F TARGETS; (M5939)HALLMARK P53 PATHWAY; (M5950)HALLMARK ALLOGRAFT REJECTION	1.0	1.0	0.0	0.0	0.0	1.0	0.0	0.0	0.0	0.0	0.0	0.0	0.0	0.0	0.0	0.0	0.0	0.0	1.0	1.0
CEBPA	1050	symbol	H. sapiens	1050	H. sapiens	CEBPA	CCAAT enhancer binding protein alpha	GO:0000050 urea cycle;GO:0045945 positive regulation of transcription by RNA polymerase III;GO:0019627 urea metabolic process		Transcription factors:Basic domains; Cancer-related genes:Mutated cancer genes; Predicted intracellular proteins; Disease related genes; Cancer-related genes:Mutational cancer driver genes	Nucleoplasm (Approved); Additional: Vesicles		(M106)PID HNF3B PATHWAY; (M151)PID AR TF PATHWAY; (M254)PID MYC REPRESS PATHWAY	(M5939)HALLMARK P53 PATHWAY	1.0	0.0	1.0	0.0	1.0	1.0	1.0	0.0	0.0	0.0	0.0	0.0	0.0	0.0	1.0	0.0	0.0	0.0	0.0	0.0
CELSR2	1952	symbol	H. sapiens	1952	H. sapiens	CELSR2	cadherin EGF LAG seven-pass G-type receptor 2	GO:0033326 cerebrospinal fluid secretion;GO:0021999 neural plate anterior/posterior regionalization;GO:0060897 neural plate regionalization		G-protein coupled receptors:GPCRs excl olfactory receptors; G-protein coupled receptors:Family 2 (B) receptors	Cytosol (Approved)			(M5906)HALLMARK ESTROGEN RESPONSE EARLY; (M5907)HALLMARK ESTROGEN RESPONSE LATE; (M5956)HALLMARK KRAS SIGNALING DN	0.0	0.0	0.0	0.0	1.0	0.0	0.0	0.0	0.0	1.0	1.0	0.0	0.0	0.0	0.0	0.0	0.0	0.0	0.0	0.0
CENPV	201161	symbol	H. sapiens	201161	H. sapiens	CENPV	centromere protein V	GO:0031508 pericentric heterochromatin assembly;GO:0140462 pericentric heterochromatin organization;GO:0031055 chromatin remodeling at centromere		Predicted intracellular proteins	Nucleoplasm (Approved); Additional: Cytosol;Midbody				1.0	1.0	0.0	0.0	0.0	0.0	0.0	0.0	0.0	0.0	0.0	0.0	0.0	1.0	0.0	0.0	0.0	0.0	0.0	0.0
CGA	1081	symbol	H. sapiens	1081	H. sapiens	CGA	glycoprotein hormones, alpha polypeptide	GO:0046884 follicle-stimulating hormone secretion;GO:0032275 luteinizing hormone secretion;GO:0032274 gonadotropin secretion		Cancer-related genes:Candidate cancer biomarkers; Predicted secreted proteins			(M115)PID REG GR PATHWAY		0.0	0.0	0.0	0.0	0.0	0.0	0.0	1.0	0.0	0.0	0.0	0.0	0.0	1.0	0.0	0.0	0.0	0.0	0.0	0.0
CHCHD6	84303	symbol	H. sapiens	84303	H. sapiens	CHCHD6	coiled-coil-helix-coiled-coil-helix domain containing 6	GO:0042407 cristae formation;GO:0007007 inner mitochondrial membrane organization;GO:0007006 mitochondrial membrane organization		Predicted intracellular proteins	Mitochondria (Supported)				0.0	0.0	0.0	0.0	0.0	0.0	0.0	0.0	0.0	0.0	0.0	0.0	0.0	0.0	0.0	0.0	0.0	0.0	0.0	0.0
CHRNA1	1134	symbol	H. sapiens	1134	H. sapiens	CHRNA1	cholinergic receptor nicotinic alpha 1 subunit	GO:0048630 skeletal muscle tissue growth;GO:0046716 muscle cell cellular homeostasis;GO:0007271 synaptic transmission, cholinergic		Transporters:Transporter channels and pores; Disease related genes	Plasma membrane (Supported)	Lamotrigine; Agmatine	(M175)PID ERBB2 ERBB3 PATHWAY	(M5909)HALLMARK MYOGENESIS	0.0	0.0	0.0	0.0	0.0	0.0	0.0	0.0	1.0	0.0	0.0	0.0	0.0	0.0	0.0	0.0	0.0	0.0	0.0	0.0
CHSY3	337876	symbol	H. sapiens	337876	H. sapiens	CHSY3	chondroitin sulfate synthase 3	GO:0030206 chondroitin sulfate biosynthetic process;GO:0050650 chondroitin sulfate proteoglycan biosynthetic process;GO:0030204 chondroitin sulfate metabolic process		ENZYME proteins:Transferases; Predicted intracellular proteins; Enzymes					0.0	0.0	0.0	0.0	0.0	0.0	0.0	0.0	0.0	0.0	0.0	0.0	0.0	0.0	0.0	0.0	0.0	0.0	0.0	0.0
CITED4	163732	symbol	H. sapiens	163732	H. sapiens	CITED4	Cbp/p300 interacting transactivator with Glu/Asp rich carboxy-terminal domain 4	GO:0043627 response to estrogen;GO:0009725 response to hormone;GO:0045893 positive regulation of transcription, DNA-templated		Predicted intracellular proteins	Vesicles (Approved)				0.0	0.0	0.0	0.0	0.0	0.0	0.0	0.0	0.0	0.0	0.0	0.0	0.0	0.0	0.0	0.0	0.0	0.0	0.0	0.0
CLDN1	9076	symbol	H. sapiens	9076	H. sapiens	CLDN1	claudin 1	GO:0061772 xenobiotic transport across blood-nerve barrier;GO:1903544 response to butyrate;GO:1903545 cellular response to butyrate		Transporters:Transporter channels and pores; Potential drug targets; Disease related genes			(M72)PID NECTIN PATHWAY		1.0	0.0	0.0	0.0	0.0	0.0	0.0	0.0	0.0	0.0	0.0	0.0	0.0	1.0	0.0	0.0	0.0	0.0	1.0	0.0
CLEC14A	161198	symbol	H. sapiens	161198	H. sapiens	CLEC14A	C-type lectin domain containing 14A	GO:0036325 vascular endothelial growth factor receptor-3 signaling pathway;GO:0036324 vascular endothelial growth factor receptor-2 signaling pathway;GO:0001946 lymphangiogenesis			Endoplasmic reticulum;Golgi apparatus (Supported)	Resveratrol	(M5880)NABA ECM AFFILIATED; (M5885)NABA MATRISOME ASSOCIATED; (M5889)NABA MATRISOME		0.0	0.0	0.0	0.0	0.0	0.0	0.0	0.0	0.0	0.0	0.0	0.0	0.0	1.0	0.0	0.0	1.0	0.0	0.0	0.0
CNIH2	254263	symbol	H. sapiens	254263	H. sapiens	CNIH2	cornichon family AMPA receptor auxiliary protein 2	GO:1902684 negative regulation of receptor localization to synapse;GO:1901609 negative regulation of vesicle transport along microtubule;GO:1902804 negative regulation of synaptic vesicle transport		Transporters:Accessory Factors Involved in Transport				(M5951)HALLMARK SPERMATOGENESIS	0.0	0.0	0.0	0.0	0.0	0.0	0.0	0.0	0.0	0.0	0.0	0.0	0.0	0.0	0.0	0.0	0.0	0.0	0.0	0.0
CNKSR3	154043	symbol	H. sapiens	154043	H. sapiens	CNKSR3	CNKSR family member 3	GO:0033137 negative regulation of peptidyl-serine phosphorylation;GO:0010765 positive regulation of sodium ion transport;GO:0070373 negative regulation of ERK1 and ERK2 cascade		Predicted intracellular proteins	Mitochondria (Approved); Additional: Cytosol				0.0	0.0	0.0	0.0	0.0	0.0	0.0	0.0	0.0	0.0	0.0	0.0	0.0	0.0	0.0	0.0	1.0	0.0	0.0	0.0
CNTN5	53942	symbol	H. sapiens	53942	H. sapiens	CNTN5	contactin 5	GO:0099054 presynapse assembly;GO:0099172 presynapse organization;GO:0007605 sensory perception of sound		Predicted intracellular proteins					0.0	0.0	0.0	0.0	0.0	0.0	0.0	0.0	0.0	0.0	0.0	0.0	0.0	0.0	0.0	0.0	0.0	0.0	0.0	0.0
COCH	1690	symbol	H. sapiens	1690	H. sapiens	COCH	cochlin	GO:0045089 positive regulation of innate immune response;GO:0007605 sensory perception of sound;GO:0008360 regulation of cell shape		Transporters:Accessory Factors Involved in Transport; Predicted intracellular proteins; Predicted secreted proteins; Disease related genes; Potential drug targets	Vesicles (Supported)		(M3008)NABA ECM GLYCOPROTEINS; (M5884)NABA CORE MATRISOME; (M5889)NABA MATRISOME	(M5947)HALLMARK IL2 STAT5 SIGNALING	0.0	0.0	0.0	0.0	0.0	0.0	0.0	0.0	0.0	0.0	0.0	0.0	0.0	0.0	0.0	0.0	0.0	0.0	0.0	0.0
COL25A1	84570	symbol	H. sapiens	84570	H. sapiens	COL25A1	collagen type XXV alpha 1 chain			Predicted intracellular proteins; Disease related genes	Cytosol;Vesicles (Approved); Additional: Endoplasmic reticulum		(M3005)NABA COLLAGENS; (M5884)NABA CORE MATRISOME; (M5889)NABA MATRISOME		0.0	0.0	0.0	0.0	0.0	0.0	0.0	0.0	0.0	0.0	0.0	0.0	0.0	0.0	0.0	0.0	0.0	0.0	0.0	0.0
COL4A1	1282	symbol	H. sapiens	1282	H. sapiens	COL4A1	collagen type IV alpha 1 chain	GO:0061304 retinal blood vessel morphogenesis;GO:0061299 retina vasculature morphogenesis in camera-type eye;GO:0038063 collagen-activated tyrosine kinase receptor signaling pathway		Predicted intracellular proteins; Predicted secreted proteins; Disease related genes			(M5887)NABA BASEMENT MEMBRANES; (M53)PID INTEGRIN3 PATHWAY; (M3005)NABA COLLAGENS	(M5905)HALLMARK ADIPOGENESIS; (M5930)HALLMARK EPITHELIAL MESENCHYMAL TRANSITION	0.0	0.0	0.0	0.0	1.0	1.0	1.0	1.0	0.0	1.0	0.0	0.0	0.0	1.0	0.0	0.0	1.0	1.0	1.0	0.0
COL4A2	1284	symbol	H. sapiens	1284	H. sapiens	COL4A2	collagen type IV alpha 2 chain	GO:0038063 collagen-activated tyrosine kinase receptor signaling pathway;GO:0038065 collagen-activated signaling pathway;GO:0035987 endodermal cell differentiation		Cancer-related genes:Candidate cancer biomarkers; Predicted intracellular proteins; Predicted secreted proteins; Disease related genes	Vesicles (Supported)		(M5887)NABA BASEMENT MEMBRANES; (M3005)NABA COLLAGENS; (M5884)NABA CORE MATRISOME	(M5909)HALLMARK MYOGENESIS; (M5921)HALLMARK COMPLEMENT; (M5930)HALLMARK EPITHELIAL MESENCHYMAL TRANSITION	0.0	0.0	0.0	0.0	1.0	1.0	0.0	1.0	0.0	0.0	0.0	0.0	0.0	1.0	0.0	0.0	1.0	0.0	1.0	0.0
COL4A5	1287	symbol	H. sapiens	1287	H. sapiens	COL4A5	collagen type IV alpha 5 chain	GO:0038063 collagen-activated tyrosine kinase receptor signaling pathway;GO:0038065 collagen-activated signaling pathway;GO:0007528 neuromuscular junction development		Cancer-related genes:Candidate cancer biomarkers; Predicted intracellular proteins; Predicted secreted proteins; Disease related genes	Plasma membrane (Approved); Additional: Vesicles		(M5887)NABA BASEMENT MEMBRANES; (M53)PID INTEGRIN3 PATHWAY; (M3005)NABA COLLAGENS		0.0	0.0	0.0	0.0	0.0	1.0	0.0	1.0	0.0	0.0	0.0	0.0	0.0	0.0	0.0	0.0	1.0	0.0	1.0	0.0
COL7A1	1294	symbol	H. sapiens	1294	H. sapiens	COL7A1	collagen type VII alpha 1 chain	GO:0035987 endodermal cell differentiation;GO:0001706 endoderm formation;GO:0007492 endoderm development		Predicted intracellular proteins; Predicted secreted proteins; Disease related genes	Endoplasmic reticulum (Approved); Additional: Vesicles		(M3005)NABA COLLAGENS; (M198)PID SYNDECAN 1 PATHWAY; (M18)PID INTEGRIN1 PATHWAY	(M5930)HALLMARK EPITHELIAL MESENCHYMAL TRANSITION	0.0	0.0	0.0	0.0	1.0	0.0	0.0	0.0	0.0	0.0	0.0	0.0	0.0	0.0	0.0	0.0	0.0	0.0	0.0	0.0
COQ9	57017	symbol	H. sapiens	57017	H. sapiens	COQ9	coenzyme Q9	GO:0006744 ubiquinone biosynthetic process;GO:1901663 quinone biosynthetic process;GO:0006743 ubiquinone metabolic process		Predicted intracellular proteins; Disease related genes	Cytosol;Mitochondria (Approved)			(M5905)HALLMARK ADIPOGENESIS	0.0	0.0	0.0	0.0	0.0	0.0	0.0	0.0	0.0	0.0	0.0	0.0	0.0	0.0	0.0	0.0	0.0	0.0	0.0	0.0
CORIN	10699	symbol	H. sapiens	10699	H. sapiens	CORIN	corin, serine peptidase	GO:0003050 regulation of systemic arterial blood pressure by atrial natriuretic peptide;GO:0035813 regulation of renal sodium excretion;GO:0035812 renal sodium excretion		Predicted intracellular proteins; Peptidases:Serine-type peptidases; Enzymes; Disease related genes; Potential drug targets	Plasma membrane (Approved); Additional: Actin filaments;Nuclear bodies				0.0	0.0	0.0	0.0	0.0	0.0	0.0	0.0	0.0	0.0	0.0	0.0	0.0	0.0	0.0	0.0	0.0	0.0	0.0	0.0
COX16	51241	symbol	H. sapiens	51241	H. sapiens	COX16	cytochrome c oxidase assembly factor COX16	GO:0033617 mitochondrial cytochrome c oxidase assembly;GO:0008535 respiratory chain complex IV assembly;GO:0017004 cytochrome complex assembly		Predicted intracellular proteins	Mitochondria (Supported)				1.0	0.0	0.0	0.0	0.0	0.0	0.0	0.0	0.0	0.0	0.0	0.0	0.0	0.0	0.0	0.0	0.0	0.0	0.0	1.0
COX20	116228	symbol	H. sapiens	116228	H. sapiens	COX20	cytochrome c oxidase assembly factor COX20	GO:0033617 mitochondrial cytochrome c oxidase assembly;GO:0008535 respiratory chain complex IV assembly;GO:0017004 cytochrome complex assembly		Disease related genes	Mitochondria (Enhanced)				1.0	0.0	0.0	0.0	0.0	0.0	0.0	0.0	0.0	0.0	0.0	0.0	0.0	0.0	0.0	0.0	0.0	0.0	0.0	1.0
COX6A1	1337	symbol	H. sapiens	1337	H. sapiens	COX6A1	cytochrome c oxidase subunit 6A1	GO:0006123 mitochondrial electron transport, cytochrome c to oxygen;GO:0019646 aerobic electron transport chain;GO:0042773 ATP synthesis coupled electron transport		Disease related genes	Mitochondria (Supported)			(M5905)HALLMARK ADIPOGENESIS; (M5936)HALLMARK OXIDATIVE PHOSPHORYLATION	1.0	0.0	0.0	0.0	0.0	0.0	0.0	0.0	0.0	0.0	0.0	0.0	0.0	0.0	0.0	0.0	0.0	0.0	0.0	1.0
CPA4	51200	symbol	H. sapiens	51200	H. sapiens	CPA4	carboxypeptidase A4	GO:0016573 histone acetylation;GO:0018393 internal peptidyl-lysine acetylation;GO:0006475 internal protein amino acid acetylation		Predicted intracellular proteins; Predicted secreted proteins; Enzymes; Peptidases:Metallopeptidases	Nucleoplasm (Approved); Additional: Centrosome;Cytosol				0.0	0.0	0.0	0.0	0.0	0.0	0.0	0.0	0.0	0.0	0.0	0.0	0.0	0.0	0.0	0.0	0.0	0.0	0.0	0.0
CRELD2	79174	symbol	H. sapiens	79174	H. sapiens	CRELD2	cysteine rich with EGF like domains 2			Predicted secreted proteins			(M3008)NABA ECM GLYCOPROTEINS; (M5884)NABA CORE MATRISOME; (M5889)NABA MATRISOME		0.0	0.0	0.0	0.0	0.0	0.0	0.0	0.0	0.0	0.0	0.0	0.0	0.0	0.0	0.0	0.0	0.0	0.0	0.0	0.0
CSPG4	1464	symbol	H. sapiens	1464	H. sapiens	CSPG4	chondroitin sulfate proteoglycan 4	GO:0006929 substrate-dependent cell migration;GO:0097178 ruffle assembly;GO:0008347 glial cell migration			Plasma membrane (Enhanced); Additional: Nucleoplasm		(M18)PID INTEGRIN1 PATHWAY; (M5880)NABA ECM AFFILIATED; (M5885)NABA MATRISOME ASSOCIATED		0.0	0.0	0.0	0.0	0.0	0.0	0.0	0.0	0.0	0.0	0.0	0.0	0.0	1.0	0.0	0.0	1.0	0.0	0.0	0.0
CSRP1	1465	symbol	H. sapiens	1465	H. sapiens	CSRP1	cysteine and glycine rich protein 1	GO:0045214 sarcomere organization;GO:0030239 myofibril assembly;GO:0055002 striated muscle cell development		Predicted intracellular proteins		Artenimol		(M5946)HALLMARK COAGULATION; (M5921)HALLMARK COMPLEMENT	1.0	0.0	0.0	0.0	0.0	0.0	0.0	0.0	1.0	0.0	1.0	0.0	0.0	0.0	0.0	0.0	0.0	0.0	0.0	0.0
CTB-113P19.1						None	None	None	None	None	None	None	None	None	nan	nan	nan	nan	nan	nan	nan	nan	nan	nan	nan	nan	nan	nan	nan	nan	nan	nan	nan	nan
CTBP1-AS2	92070	gene_synonym	H. sapiens	92070	H. sapiens	CTBP1-DT	CTBP1 divergent transcript								0.0	0.0	0.0	0.0	0.0	0.0	0.0	0.0	0.0	0.0	0.0	0.0	0.0	0.0	0.0	0.0	0.0	0.0	0.0	0.0
CTBP2	1488	symbol	H. sapiens	1488	H. sapiens	CTBP2	C-terminal binding protein 2	GO:0048386 positive regulation of retinoic acid receptor signaling pathway;GO:0048790 maintenance of presynaptic active zone structure;GO:1990709 presynaptic active zone organization		Predicted intracellular proteins	Cytosol (Approved)		(M5493)WNT SIGNALING		1.0	0.0	0.0	0.0	0.0	1.0	0.0	0.0	0.0	0.0	0.0	0.0	1.0	0.0	0.0	1.0	0.0	0.0	0.0	1.0
CTNND2	1501	symbol	H. sapiens	1501	H. sapiens	CTNND2	catenin delta 2	GO:0060997 dendritic spine morphogenesis;GO:0097061 dendritic spine organization;GO:0106027 neuron projection organization		Predicted intracellular proteins; Disease related genes	Cell Junctions;Nucleoplasm (Approved); Additional: Cytosol				0.0	0.0	0.0	0.0	0.0	0.0	0.0	0.0	0.0	0.0	1.0	0.0	0.0	0.0	0.0	0.0	0.0	0.0	0.0	0.0
CTU2	348180	symbol	H. sapiens	348180	H. sapiens	CTU2	cytosolic thiouridylase subunit 2	GO:0002143 tRNA wobble position uridine thiolation;GO:0032447 protein urmylation;GO:0034227 tRNA thio-modification		Predicted intracellular proteins	Mitochondria (Supported)				0.0	0.0	0.0	0.0	0.0	0.0	0.0	1.0	0.0	0.0	0.0	0.0	0.0	0.0	0.0	0.0	0.0	0.0	0.0	0.0
CYTIP	9595	symbol	H. sapiens	9595	H. sapiens	CYTIP	cytohesin 1 interacting protein	GO:0030155 regulation of cell adhesion;GO:0007155 cell adhesion;GO:0022610 biological adhesion		Predicted intracellular proteins	Cytosol (Approved); Additional: Nucleoplasm				0.0	0.0	0.0	0.0	0.0	0.0	0.0	0.0	0.0	0.0	0.0	0.0	0.0	0.0	0.0	0.0	0.0	0.0	0.0	0.0
DACT2	168002	symbol	H. sapiens	168002	H. sapiens	DACT2	dishevelled binding antagonist of beta catenin 2	GO:0072061 inner medullary collecting duct development;GO:1900108 negative regulation of nodal signaling pathway;GO:1900107 regulation of nodal signaling pathway		Predicted intracellular proteins			(M286)PID TGFBR PATHWAY		0.0	0.0	0.0	0.0	0.0	0.0	0.0	0.0	0.0	0.0	1.0	0.0	0.0	0.0	0.0	0.0	0.0	1.0	0.0	0.0
DAGLA	747	symbol	H. sapiens	747	H. sapiens	DAGLA	diacylglycerol lipase alpha	GO:0046340 diacylglycerol catabolic process;GO:0098920 retrograde trans-synaptic signaling by lipid;GO:0098921 retrograde trans-synaptic signaling by endocannabinoid		Disease related genes			(M266)PID NCADHERIN PATHWAY		0.0	0.0	1.0	0.0	0.0	0.0	0.0	0.0	0.0	0.0	0.0	0.0	0.0	0.0	0.0	0.0	0.0	0.0	0.0	0.0
DAPK3	1613	symbol	H. sapiens	1613	H. sapiens	DAPK3	death associated protein kinase 3	GO:0031038 myosin II filament organization;GO:0043519 regulation of myosin II filament organization;GO:0031033 myosin filament organization	CAMK Ser/Thr protein kinase family	ENZYME proteins:Transferases; Kinases:CAMK Ser/Thr protein kinases; Enzymes; Predicted intracellular proteins	Nucleoplasm (Supported)	2-tert-butyl-9-fluoro-1,6-dihydrobenzo[h]imidazo[4,5-f]isoquinolin-7-one; 4-(6-{[(1R)-1-(hydroxymethyl)propyl]amino}imidazo[1,2-b]pyridazin-3-yl)benzoic acid; (4R)-7,8-dichloro-1',9-dimethyl-1-oxo-1,2,4,9-tetrahydrospiro[beta-carboline-3,4'-piperidine]-4-carbonitrile; Fostamatinib			0.0	0.0	0.0	0.0	0.0	1.0	0.0	0.0	0.0	0.0	0.0	0.0	0.0	1.0	0.0	0.0	0.0	0.0	0.0	1.0
DBH	1621	symbol	H. sapiens	1621	H. sapiens	DBH	dopamine beta-hydroxylase	GO:0042309 homoiothermy;GO:0006589 octopamine biosynthetic process;GO:0046333 octopamine metabolic process		Predicted intracellular proteins; FDA approved drug targets:Small molecule drugs; Enzymes; ENZYME proteins:Oxidoreductases; Disease related genes	Vesicles (Supported); Additional: Endoplasmic reticulum	Ascorbic acid; Disulfiram; Dopamine			0.0	0.0	0.0	0.0	0.0	0.0	0.0	1.0	0.0	0.0	0.0	0.0	0.0	0.0	0.0	0.0	0.0	0.0	0.0	0.0
DBH-AS1	138948	symbol	H. sapiens	138948	H. sapiens	DBH-AS1	DBH antisense RNA 1								0.0	0.0	0.0	0.0	0.0	0.0	0.0	0.0	0.0	0.0	0.0	0.0	0.0	0.0	0.0	0.0	0.0	0.0	0.0	0.0
DCAKD	79877	symbol	H. sapiens	79877	H. sapiens	DCAKD	dephospho-CoA kinase domain containing	GO:0015937 coenzyme A biosynthetic process;GO:0015936 coenzyme A metabolic process;GO:0033866 nucleoside bisphosphate biosynthetic process		Predicted intracellular proteins	Nucleoplasm (Approved)				0.0	0.0	0.0	0.0	0.0	0.0	0.0	0.0	0.0	0.0	0.0	0.0	0.0	0.0	0.0	0.0	0.0	0.0	0.0	0.0
DCC	1630	symbol	H. sapiens	1630	H. sapiens	DCC	DCC netrin 1 receptor	GO:0021965 spinal cord ventral commissure morphogenesis;GO:0033563 dorsal/ventral axon guidance;GO:2000171 negative regulation of dendrite development		Cancer-related genes:Candidate cancer biomarkers; Predicted intracellular proteins; Disease related genes	Golgi apparatus (Approved)		(M108)PID NETRIN PATHWAY	(M5951)HALLMARK SPERMATOGENESIS; (M5956)HALLMARK KRAS SIGNALING DN	0.0	0.0	0.0	1.0	0.0	1.0	0.0	1.0	0.0	1.0	1.0	0.0	0.0	0.0	0.0	0.0	0.0	0.0	0.0	1.0
DCLK2	166614	symbol	H. sapiens	166614	H. sapiens	DCLK2	doublecortin like kinase 2	GO:0021860 pyramidal neuron development;GO:0021859 pyramidal neuron differentiation;GO:0021884 forebrain neuron development	CAMK Ser/Thr protein kinase family	ENZYME proteins:Transferases; Kinases:CAMK Ser/Thr protein kinases; Enzymes; Predicted intracellular proteins		Fostamatinib			0.0	0.0	0.0	0.0	0.0	0.0	0.0	0.0	0.0	1.0	0.0	0.0	0.0	0.0	0.0	0.0	0.0	0.0	0.0	0.0
DDX39B	7919	symbol	H. sapiens	7919	H. sapiens	DDX39B	DExD-box helicase 39B	GO:2000002 negative regulation of DNA damage checkpoint;GO:0010501 RNA secondary structure unwinding;GO:1901977 negative regulation of cell cycle checkpoint		Predicted intracellular proteins; Transporters:Primary Active Transporters; ENZYME proteins:Hydrolases; Enzymes	Nuclear speckles (Enhanced)	Artenimol			1.0	0.0	0.0	0.0	0.0	0.0	0.0	1.0	1.0	0.0	0.0	0.0	0.0	0.0	0.0	0.0	0.0	0.0	0.0	0.0
DDX49	54555	symbol	H. sapiens	54555	H. sapiens	DDX49	DEAD-box helicase 49	GO:0044357 regulation of rRNA stability;GO:1902374 regulation of rRNA catabolic process;GO:0016075 rRNA catabolic process		Predicted intracellular proteins; ENZYME proteins:Hydrolases; Enzymes	Mitochondria (Approved)				0.0	0.0	0.0	0.0	0.0	0.0	0.0	1.0	0.0	0.0	0.0	0.0	0.0	0.0	0.0	0.0	0.0	0.0	0.0	0.0
DEF6	50619	symbol	H. sapiens	50619	H. sapiens	DEF6	DEF6 guanine nucleotide exchange factor	GO:0051056 regulation of small GTPase mediated signal transduction;GO:0007264 small GTPase mediated signal transduction;GO:1902531 regulation of intracellular signal transduction		Predicted intracellular proteins	Nucleoplasm (Enhanced)		(M241)PID RAC1 REG PATHWAY; (M68)PID RHOA REG PATHWAY	(M5939)HALLMARK P53 PATHWAY	1.0	0.0	0.0	0.0	0.0	0.0	0.0	0.0	0.0	0.0	0.0	0.0	0.0	0.0	0.0	0.0	0.0	0.0	0.0	0.0
DFFA	1676	symbol	H. sapiens	1676	H. sapiens	DFFA	DNA fragmentation factor subunit alpha	GO:0032076 negative regulation of deoxyribonuclease activity;GO:1902511 negative regulation of apoptotic DNA fragmentation;GO:1903625 negative regulation of DNA catabolic process		Predicted intracellular proteins	Cytosol;Plasma membrane (Supported)		(M7997)SA CASPASE CASCADE; (M197)PID HIV NEF PATHWAY; (M220)PID CASPASE PATHWAY	(M5902)HALLMARK APOPTOSIS	0.0	0.0	0.0	0.0	0.0	0.0	0.0	0.0	0.0	0.0	0.0	0.0	0.0	0.0	0.0	0.0	0.0	0.0	0.0	1.0
DGAT1	8694	symbol	H. sapiens	8694	H. sapiens	DGAT1	diacylglycerol O-acyltransferase 1	GO:0006640 monoacylglycerol biosynthetic process;GO:0034379 very-low-density lipoprotein particle assembly;GO:0046462 monoacylglycerol metabolic process		ENZYME proteins:Transferases; Potential drug targets; Enzymes; Disease related genes	Endoplasmic reticulum (Approved); Additional: Nucleoli			(M5941)HALLMARK UV RESPONSE UP; (M5905)HALLMARK ADIPOGENESIS	0.0	0.0	0.0	0.0	0.0	0.0	0.0	0.0	0.0	0.0	0.0	0.0	0.0	0.0	0.0	0.0	0.0	0.0	0.0	0.0
DGKD	8527	symbol	H. sapiens	8527	H. sapiens	DGKD	diacylglycerol kinase delta	GO:0090038 negative regulation of protein kinase C signaling;GO:2000370 positive regulation of clathrin-dependent endocytosis;GO:0046834 lipid phosphorylation		ENZYME proteins:Transferases; Predicted intracellular proteins; Enzymes	Cytosol (Supported)	Phosphatidyl serine			0.0	0.0	1.0	0.0	0.0	0.0	0.0	0.0	0.0	0.0	0.0	0.0	0.0	0.0	0.0	0.0	1.0	0.0	0.0	0.0
DHCR7	1717	symbol	H. sapiens	1717	H. sapiens	DHCR7	7-dehydrocholesterol reductase	GO:0016128 phytosteroid metabolic process;GO:0016129 phytosteroid biosynthetic process;GO:0016131 brassinosteroid metabolic process		Enzymes; Potential drug targets; ENZYME proteins:Oxidoreductases; Disease related genes	Endoplasmic reticulum (Supported)	NADH		(M5892)HALLMARK CHOLESTEROL HOMEOSTASIS; (M5905)HALLMARK ADIPOGENESIS; (M5906)HALLMARK ESTROGEN RESPONSE EARLY	0.0	0.0	0.0	0.0	0.0	0.0	0.0	0.0	0.0	0.0	0.0	0.0	0.0	0.0	0.0	0.0	0.0	0.0	0.0	0.0
DHRS13	147015	symbol	H. sapiens	147015	H. sapiens	DHRS13	dehydrogenase/reductase 13	GO:0042574 retinal metabolic process;GO:0042572 retinol metabolic process;GO:0006081 cellular aldehyde metabolic process		Predicted intracellular proteins; Predicted secreted proteins	Vesicles (Approved)				0.0	0.0	0.0	0.0	0.0	0.0	0.0	0.0	0.0	0.0	0.0	0.0	0.0	0.0	0.0	0.0	0.0	0.0	0.0	0.0
DHX30	22907	symbol	H. sapiens	22907	H. sapiens	DHX30	DExH-box helicase 30	GO:1902775 mitochondrial large ribosomal subunit assembly;GO:0061668 mitochondrial ribosome assembly;GO:0000027 ribosomal large subunit assembly		Predicted intracellular proteins; ENZYME proteins:Hydrolases; Enzymes	Mitochondria (Supported); Additional: Cytosol				0.0	0.0	0.0	0.0	0.0	0.0	0.0	0.0	0.0	0.0	0.0	0.0	0.0	0.0	0.0	0.0	0.0	0.0	0.0	0.0
DIO2	1734	symbol	H. sapiens	1734	H. sapiens	DIO2	iodothyronine deiodinase 2	GO:0042404 thyroid hormone catabolic process;GO:0001514 selenocysteine incorporation;GO:0006451 translational readthrough		Predicted intracellular proteins; Enzymes; ENZYME proteins:Oxidoreductases	Nucleoplasm;Vesicles (Approved); Additional: Plasma membrane			(M5948)HALLMARK BILE ACID METABOLISM	0.0	0.0	0.0	0.0	0.0	0.0	0.0	1.0	0.0	0.0	0.0	0.0	0.0	0.0	0.0	0.0	0.0	0.0	0.0	0.0
DLG3	1741	symbol	H. sapiens	1741	H. sapiens	DLG3	discs large MAGUK scaffold protein 3	GO:0099562 maintenance of postsynaptic density structure;GO:0098880 maintenance of postsynaptic specialization structure;GO:0099558 maintenance of synapse structure		Predicted intracellular proteins; Disease related genes	Nucleoli;Nucleoplasm (Approved)				0.0	0.0	0.0	0.0	1.0	0.0	0.0	1.0	0.0	0.0	0.0	0.0	0.0	0.0	0.0	1.0	0.0	0.0	0.0	1.0
DLG4	1742	symbol	H. sapiens	1742	H. sapiens	DLG4	discs large MAGUK scaffold protein 4	GO:2000821 regulation of grooming behavior;GO:0150012 positive regulation of neuron projection arborization;GO:0097113 AMPA glutamate receptor clustering		Predicted intracellular proteins; Transporters:Accessory Factors Involved in Transport		Guanidine; Guanosine-5'-Monophosphate	(M15743)ST GA12 PATHWAY; (M2701)ST MYOCYTE AD PATHWAY; (M12645)ST GA13 PATHWAY	(M5949)HALLMARK PEROXISOME; (M5941)HALLMARK UV RESPONSE UP	1.0	0.0	0.0	0.0	0.0	0.0	0.0	1.0	0.0	0.0	1.0	0.0	0.0	0.0	0.0	1.0	1.0	0.0	0.0	1.0
DLK1	8788	symbol	H. sapiens	8788	H. sapiens	DLK1	delta like non-canonical Notch ligand 1	GO:0045746 negative regulation of Notch signaling pathway;GO:0008593 regulation of Notch signaling pathway;GO:0007219 Notch signaling pathway		Predicted intracellular proteins	Golgi apparatus (Approved)		(M106)PID HNF3B PATHWAY; (M17)PID NOTCH PATHWAY		1.0	0.0	0.0	0.0	0.0	0.0	0.0	0.0	0.0	0.0	0.0	0.0	0.0	0.0	0.0	0.0	0.0	0.0	1.0	0.0
DLL3	10683	symbol	H. sapiens	10683	H. sapiens	DLL3	delta like canonical Notch ligand 3	GO:0007386 compartment pattern specification;GO:0048339 paraxial mesoderm development;GO:0001756 somitogenesis		Predicted intracellular proteins; Disease related genes	Nucleoplasm;Plasma membrane (Approved)		(M17)PID NOTCH PATHWAY		0.0	0.0	0.0	1.0	1.0	0.0	0.0	0.0	0.0	0.0	1.0	1.0	1.0	0.0	0.0	0.0	0.0	1.0	1.0	0.0
DLX1	1745	symbol	H. sapiens	1745	H. sapiens	DLX1	distal-less homeobox 1	GO:0021893 cerebral cortex GABAergic interneuron fate commitment;GO:1902871 positive regulation of amacrine cell differentiation;GO:1902869 regulation of amacrine cell differentiation		Predicted intracellular proteins; Transcription factors:Helix-turn-helix domains			(M2)PID SMAD2 3NUCLEAR PATHWAY		0.0	0.0	0.0	1.0	1.0	0.0	1.0	0.0	0.0	1.0	1.0	1.0	0.0	0.0	0.0	0.0	0.0	0.0	0.0	0.0
DLX2	1746	symbol	H. sapiens	1746	H. sapiens	DLX2	distal-less homeobox 2	GO:0021893 cerebral cortex GABAergic interneuron fate commitment;GO:1902871 positive regulation of amacrine cell differentiation;GO:1902869 regulation of amacrine cell differentiation		Predicted intracellular proteins; Transcription factors:Helix-turn-helix domains	Nuclear speckles (Approved)				0.0	0.0	0.0	1.0	1.0	0.0	1.0	0.0	0.0	1.0	1.0	1.0	0.0	0.0	0.0	0.0	0.0	0.0	0.0	0.0
DPH1	1801	symbol	H. sapiens	1801	H. sapiens	DPH1	diphthamide biosynthesis 1	GO:0017182 peptidyl-diphthamide metabolic process;GO:0017183 peptidyl-diphthamide biosynthetic process from peptidyl-histidine;GO:1900247 regulation of cytoplasmic translational elongation		ENZYME proteins:Transferases; Predicted intracellular proteins; Enzymes; Disease related genes; Potential drug targets	Nucleoplasm (Approved); Additional: Cell Junctions				0.0	0.0	0.0	0.0	0.0	0.0	0.0	1.0	0.0	0.0	0.0	0.0	0.0	0.0	0.0	0.0	0.0	0.0	0.0	0.0
DSCAM	1826	symbol	H. sapiens	1826	H. sapiens	DSCAM	DS cell adhesion molecule	GO:0060060 post-embryonic retina morphogenesis in camera-type eye;GO:0048842 positive regulation of axon extension involved in axon guidance;GO:0038007 netrin-activated signaling pathway			Golgi apparatus (Approved)		(M285)PID HNF3A PATHWAY; (M200)PID ERA GENOMIC PATHWAY		0.0	0.0	0.0	0.0	0.0	0.0	1.0	1.0	0.0	0.0	1.0	0.0	0.0	1.0	0.0	0.0	0.0	0.0	0.0	0.0
DUSP2	1844	symbol	H. sapiens	1844	H. sapiens	DUSP2	dual specificity phosphatase 2	GO:0035970 peptidyl-threonine dephosphorylation;GO:0001706 endoderm formation;GO:0007492 endoderm development		Predicted intracellular proteins; ENZYME proteins:Hydrolases; Enzymes	Nuclear membrane (Supported); Additional: Nucleoplasm			(M5928)HALLMARK MYC TARGETS V2; (M5890)HALLMARK TNFA SIGNALING VIA NFKB; (M5907)HALLMARK ESTROGEN RESPONSE LATE	0.0	0.0	0.0	0.0	1.0	0.0	0.0	0.0	0.0	0.0	0.0	0.0	0.0	0.0	0.0	0.0	0.0	0.0	0.0	1.0
DUSP8	1850	symbol	H. sapiens	1850	H. sapiens	DUSP8	dual specificity phosphatase 8	GO:0035970 peptidyl-threonine dephosphorylation;GO:0035335 peptidyl-tyrosine dephosphorylation;GO:0006470 protein dephosphorylation		Predicted intracellular proteins; ENZYME proteins:Hydrolases; Enzymes	Cytosol (Approved)		(M76)PID P38 ALPHA BETA PATHWAY; (M3721)ST JNK MAPK PATHWAY; (M166)PID ATF2 PATHWAY		0.0	0.0	0.0	0.0	0.0	0.0	0.0	0.0	0.0	0.0	0.0	0.0	0.0	0.0	0.0	0.0	0.0	0.0	0.0	1.0
DVL2	1856	symbol	H. sapiens	1856	H. sapiens	DVL2	dishevelled segment polarity protein 2	GO:0014022 neural plate elongation;GO:0022007 convergent extension involved in neural plate elongation;GO:0001839 neural plate morphogenesis		Predicted intracellular proteins	Nucleoplasm (Enhanced); Additional: Nuclear bodies		(M31)PID BETA CATENIN DEG PATHWAY; (M90)PID WNT CANONICAL PATHWAY; (M23)PID WNT NONCANONICAL PATHWAY	(M5895)HALLMARK WNT BETA CATENIN SIGNALING	1.0	0.0	0.0	0.0	1.0	1.0	1.0	0.0	1.0	0.0	1.0	0.0	1.0	0.0	0.0	1.0	0.0	0.0	1.0	1.0
EBI3	10148	symbol	H. sapiens	10148	H. sapiens	EBI3	Epstein-Barr virus induced 3	GO:0033210 leptin-mediated signaling pathway;GO:0044320 cellular response to leptin stimulus;GO:0046641 positive regulation of alpha-beta T cell proliferation		Predicted secreted proteins			(M36)PID IL27 PATHWAY; (M5883)NABA SECRETED FACTORS; (M5885)NABA MATRISOME ASSOCIATED	(M5897)HALLMARK IL6 JAK STAT3 SIGNALING; (M5932)HALLMARK INFLAMMATORY RESPONSE	0.0	0.0	1.0	0.0	0.0	0.0	0.0	0.0	0.0	0.0	0.0	0.0	0.0	0.0	0.0	0.0	0.0	0.0	0.0	0.0
EDC4	23644	symbol	H. sapiens	23644	H. sapiens	EDC4	enhancer of mRNA decapping 4	GO:0031087 deadenylation-independent decapping of nuclear-transcribed mRNA;GO:0031086 nuclear-transcribed mRNA catabolic process, deadenylation-independent decay;GO:0110156 methylguanosine-cap decapping		Predicted intracellular proteins	Cytoplasmic bodies (Enhanced); Additional: Nucleoplasm			(M5922)HALLMARK UNFOLDED PROTEIN RESPONSE	0.0	0.0	0.0	0.0	0.0	0.0	0.0	1.0	0.0	0.0	0.0	0.0	0.0	0.0	0.0	0.0	0.0	0.0	0.0	0.0
EDN2	1907	symbol	H. sapiens	1907	H. sapiens	EDN2	endothelin 2	GO:0003058 hormonal regulation of the force of heart contraction;GO:0003099 positive regulation of the force of heart contraction by chemical signal;GO:0014826 vein smooth muscle contraction		Predicted secreted proteins	Cytosol (Approved)		(M8)PID ENDOTHELIN PATHWAY; (M145)PID P53 DOWNSTREAM PATHWAY	(M5891)HALLMARK HYPOXIA; (M5956)HALLMARK KRAS SIGNALING DN	0.0	0.0	0.0	0.0	0.0	0.0	0.0	0.0	0.0	0.0	1.0	0.0	0.0	1.0	0.0	0.0	0.0	0.0	0.0	0.0
EFNB1	1947	symbol	H. sapiens	1947	H. sapiens	EFNB1	ephrin B1	GO:0031295 T cell costimulation;GO:0031294 lymphocyte costimulation;GO:0048013 ephrin receptor signaling pathway		Cancer-related genes:Candidate cancer biomarkers; Disease related genes	Plasma membrane (Supported)		(M257)PID EPHRINB REV PATHWAY; (M62)PID EPHB FWD PATHWAY		0.0	0.0	0.0	0.0	0.0	0.0	0.0	1.0	0.0	0.0	1.0	0.0	0.0	1.0	0.0	0.0	1.0	1.0	0.0	0.0
EGLN2	112398	symbol	H. sapiens	112398	H. sapiens	EGLN2	egl-9 family hypoxia inducible factor 2	GO:0018401 peptidyl-proline hydroxylation to 4-hydroxy-L-proline;GO:0019511 peptidyl-proline hydroxylation;GO:0018126 protein hydroxylation		Predicted intracellular proteins; Enzymes; ENZYME proteins:Oxidoreductases	Nucleoplasm (Supported)	Ascorbic acid; Roxadustat	(M180)PID HIF1A PATHWAY; (M44)PID HIF2PATHWAY; (M3468)NABA ECM REGULATORS	(M5938)HALLMARK REACTIVE OXYGEN SPECIES PATHWAY	1.0	0.0	0.0	0.0	0.0	1.0	0.0	0.0	0.0	0.0	0.0	0.0	0.0	0.0	0.0	0.0	0.0	0.0	0.0	1.0
EGLN3	112399	symbol	H. sapiens	112399	H. sapiens	EGLN3	egl-9 family hypoxia inducible factor 3	GO:0018401 peptidyl-proline hydroxylation to 4-hydroxy-L-proline;GO:0019511 peptidyl-proline hydroxylation;GO:0018126 protein hydroxylation		Predicted intracellular proteins; Enzymes; ENZYME proteins:Oxidoreductases	Cytosol (Supported)	Ascorbic acid; Roxadustat	(M180)PID HIF1A PATHWAY; (M44)PID HIF2PATHWAY; (M255)PID HIF1 TFPATHWAY	(M5924)HALLMARK MTORC1 SIGNALING; (M5937)HALLMARK GLYCOLYSIS	1.0	0.0	0.0	0.0	0.0	1.0	0.0	0.0	0.0	0.0	0.0	0.0	0.0	0.0	0.0	0.0	0.0	0.0	0.0	1.0
EHD3	30845	symbol	H. sapiens	30845	H. sapiens	EHD3	EH domain containing 3	GO:0086036 regulation of cardiac muscle cell membrane potential;GO:0090160 Golgi to lysosome transport;GO:0034498 early endosome to Golgi transport		Predicted intracellular proteins	Plasma membrane (Approved)				0.0	0.0	1.0	0.0	0.0	0.0	0.0	0.0	0.0	0.0	0.0	0.0	0.0	0.0	0.0	0.0	0.0	0.0	0.0	0.0
EIF2S3	1968	symbol	H. sapiens	1968	H. sapiens	EIF2S3	eukaryotic translation initiation factor 2 subunit gamma	GO:0045903 positive regulation of translational fidelity;GO:0001731 formation of translation preinitiation complex;GO:0006450 regulation of translational fidelity		Predicted intracellular proteins; Disease related genes		Guanosine-5'-Diphosphate		(M5941)HALLMARK UV RESPONSE UP	1.0	0.0	0.0	0.0	0.0	0.0	0.0	1.0	0.0	0.0	0.0	0.0	0.0	0.0	0.0	0.0	0.0	0.0	0.0	1.0
EIF3F	8665	symbol	H. sapiens	8665	H. sapiens	EIF3F	eukaryotic translation initiation factor 3 subunit F	GO:0075522 IRES-dependent viral translational initiation;GO:0019081 viral translation;GO:0001732 formation of cytoplasmic translation initiation complex		Predicted intracellular proteins; ENZYME proteins:Hydrolases; Enzymes		Quercetin			0.0	0.0	0.0	0.0	0.0	0.0	0.0	1.0	0.0	0.0	0.0	0.0	0.0	0.0	0.0	0.0	0.0	0.0	0.0	0.0
EIF3G	8666	symbol	H. sapiens	8666	H. sapiens	EIF3G	eukaryotic translation initiation factor 3 subunit G	GO:0075525 viral translational termination-reinitiation;GO:0019081 viral translation;GO:0001732 formation of cytoplasmic translation initiation complex		Predicted intracellular proteins	Cytosol (Enhanced)				0.0	0.0	0.0	0.0	0.0	0.0	0.0	1.0	0.0	0.0	0.0	0.0	0.0	0.0	0.0	0.0	0.0	0.0	0.0	0.0
EIF6	3692	symbol	H. sapiens	3692	H. sapiens	EIF6	eukaryotic translation initiation factor 6	GO:1902626 assembly of large subunit precursor of preribosome;GO:0042256 mature ribosome assembly;GO:0000054 ribosomal subunit export from nucleus		Predicted intracellular proteins	Nucleoplasm (Supported)	Copper			1.0	0.0	1.0	0.0	0.0	0.0	0.0	0.0	0.0	0.0	0.0	0.0	0.0	0.0	0.0	0.0	0.0	0.0	0.0	0.0
ELAVL2	1993	symbol	H. sapiens	1993	H. sapiens	ELAVL2	ELAV like RNA binding protein 2	GO:0006355 regulation of transcription, DNA-templated;GO:1903506 regulation of nucleic acid-templated transcription;GO:2001141 regulation of RNA biosynthetic process		Predicted intracellular proteins	Nucleoplasm (Approved); Additional: Cytosol				0.0	0.0	0.0	0.0	0.0	0.0	0.0	1.0	0.0	0.0	0.0	0.0	0.0	0.0	0.0	0.0	0.0	0.0	0.0	0.0
ELFN1	392617	symbol	H. sapiens	392617	H. sapiens	ELFN1	extracellular leucine rich repeat and fibronectin type III domain containing 1	GO:0050808 synapse organization;GO:0034330 cell junction organization;GO:0043086 negative regulation of catalytic activity			Cell Junctions;Nucleoplasm (Approved)		(M5880)NABA ECM AFFILIATED; (M5885)NABA MATRISOME ASSOCIATED; (M5889)NABA MATRISOME		0.0	0.0	0.0	0.0	0.0	0.0	0.0	0.0	0.0	0.0	0.0	0.0	0.0	0.0	0.0	0.0	0.0	0.0	0.0	0.0
ELMO3	79767	symbol	H. sapiens	79767	H. sapiens	ELMO3	engulfment and cell motility 3	GO:0006909 phagocytosis;GO:0007015 actin filament organization;GO:0030036 actin cytoskeleton organization		Predicted intracellular proteins	Cell Junctions;Plasma membrane (Approved)				0.0	0.0	0.0	0.0	0.0	0.0	0.0	0.0	0.0	0.0	0.0	0.0	0.0	0.0	0.0	0.0	0.0	0.0	0.0	0.0
ELMSAN1	91748	gene_synonym	H. sapiens	91748	H. sapiens	MIDEAS	mitotic deacetylase associated SANT domain protein	GO:0016575 histone deacetylation;GO:0006476 protein deacetylation;GO:0035601 protein deacylation		Predicted intracellular proteins; Transcription factors:Helix-turn-helix domains	Nucleoplasm (Enhanced)				0.0	0.0	0.0	0.0	0.0	0.0	0.0	0.0	0.0	0.0	0.0	0.0	0.0	0.0	0.0	0.0	0.0	0.0	0.0	0.0
ELOVL2	54898	symbol	H. sapiens	54898	H. sapiens	ELOVL2	ELOVL fatty acid elongase 2	GO:0019367 fatty acid elongation, saturated fatty acid;GO:0019368 fatty acid elongation, unsaturated fatty acid;GO:0034625 fatty acid elongation, monounsaturated fatty acid		ENZYME proteins:Transferases; Enzymes		alpha-Linolenic acid		(M5906)HALLMARK ESTROGEN RESPONSE EARLY	0.0	0.0	0.0	0.0	0.0	0.0	0.0	0.0	0.0	0.0	0.0	0.0	0.0	0.0	0.0	0.0	0.0	0.0	0.0	0.0
EMC10	284361	symbol	H. sapiens	284361	H. sapiens	EMC10	ER membrane protein complex subunit 10	GO:0045050 protein insertion into ER membrane by stop-transfer membrane-anchor sequence;GO:0071816 tail-anchored membrane protein insertion into ER membrane;GO:0045048 protein insertion into ER membrane		Predicted intracellular proteins; Predicted secreted proteins; Transporters:Primary Active Transporters					1.0	0.0	0.0	0.0	0.0	0.0	0.0	0.0	0.0	0.0	0.0	0.0	0.0	1.0	0.0	0.0	0.0	0.0	0.0	0.0
EMC6	83460	symbol	H. sapiens	83460	H. sapiens	EMC6	ER membrane protein complex subunit 6	GO:0045050 protein insertion into ER membrane by stop-transfer membrane-anchor sequence;GO:0071816 tail-anchored membrane protein insertion into ER membrane;GO:0045048 protein insertion into ER membrane		Transporters:Primary Active Transporters	Centrosome (Approved); Additional: Nucleoplasm				0.0	0.0	0.0	0.0	0.0	0.0	0.0	0.0	0.0	0.0	0.0	0.0	0.0	0.0	0.0	0.0	0.0	0.0	0.0	0.0
EMILIN3	90187	symbol	H. sapiens	90187	H. sapiens	EMILIN3	elastin microfibril interfacer 3			Predicted secreted proteins	Golgi apparatus (Approved); Additional: Cytokinetic bridge;Microtubules		(M3008)NABA ECM GLYCOPROTEINS; (M5884)NABA CORE MATRISOME; (M5889)NABA MATRISOME		0.0	0.0	0.0	0.0	0.0	0.0	0.0	0.0	0.0	0.0	0.0	0.0	0.0	0.0	0.0	0.0	0.0	0.0	0.0	0.0
ENDOV	284131	symbol	H. sapiens	284131	H. sapiens	ENDOV	endonuclease V	GO:0090502 RNA phosphodiester bond hydrolysis, endonucleolytic;GO:0090501 RNA phosphodiester bond hydrolysis;GO:0090305 nucleic acid phosphodiester bond hydrolysis		Predicted intracellular proteins					0.0	0.0	0.0	0.0	0.0	0.0	0.0	0.0	0.0	0.0	0.0	0.0	0.0	0.0	0.0	0.0	0.0	0.0	0.0	0.0
EPHA2	1969	symbol	H. sapiens	1969	H. sapiens	EPHA2	EPH receptor A2	GO:0060034 notochord cell differentiation;GO:0060035 notochord cell development;GO:0048320 axial mesoderm formation	Tyr protein kinase family	Cancer-related genes:Candidate cancer biomarkers; ENZYME proteins:Transferases; Kinases:Tyr protein kinases; RAS pathway related proteins; Cancer-related genes:Mutated cancer genes; FDA approved drug targets:Small molecule drugs; Enzymes; Disease related genes	Cell Junctions;Plasma membrane (Supported); Additional: Golgi apparatus;Nuclear speckles	Dasatinib; Phosphoaminophosphonic Acid-Adenylate Ester; Regorafenib; Fostamatinib	(M273)PID EPHA2 FWD PATHWAY; (M177)PID EPHA FWDPATHWAY; (M86)PID ARF6 PATHWAY	(M5934)HALLMARK XENOBIOTIC METABOLISM; (M5939)HALLMARK P53 PATHWAY	1.0	0.0	0.0	0.0	1.0	0.0	1.0	1.0	0.0	0.0	1.0	1.0	0.0	1.0	1.0	0.0	1.0	0.0	0.0	0.0
EPHA5	2044	symbol	H. sapiens	2044	H. sapiens	EPHA5	EPH receptor A5	GO:0032793 positive regulation of CREB transcription factor activity;GO:0048013 ephrin receptor signaling pathway;GO:0019933 cAMP-mediated signaling	Tyr protein kinase family	ENZYME proteins:Transferases; Kinases:Tyr protein kinases; Enzymes		Dasatinib; Fostamatinib	(M177)PID EPHA FWDPATHWAY	(M5956)HALLMARK KRAS SIGNALING DN	0.0	0.0	0.0	0.0	0.0	0.0	0.0	1.0	0.0	1.0	1.0	0.0	0.0	0.0	0.0	0.0	1.0	0.0	0.0	0.0
EPHB4	2050	symbol	H. sapiens	2050	H. sapiens	EPHB4	EPH receptor B4	GO:0048013 ephrin receptor signaling pathway;GO:0002042 cell migration involved in sprouting angiogenesis;GO:0043534 blood vessel endothelial cell migration	Tyr protein kinase family	Cancer-related genes:Candidate cancer biomarkers; ENZYME proteins:Transferases; Kinases:Tyr protein kinases; Predicted intracellular proteins; Enzymes; Disease related genes; Potential drug targets		Dasatinib; N-(5-chloro-1,3-benzodioxol-4-yl)-6-methoxy-7-(3-piperidin-1-ylpropoxy)quinazolin-4-amine; N'-(5-CHLORO-1,3-BENZODIOXOL-4-YL)-N-(3,4,5- TRIMETHOXYPHENYL)PYRIMIDINE-2,4-DIAMINE; N'-(3-CHLORO-4-METHOXY-PHENYL)-N-(3,4,5-TRIMETHOXYPHENYL)-1,3,5-TRIAZINE-2,4-DIAMINE; 3-({4-[(5-chloro-1,3-benzodioxol-4-yl)amino]pyrimidin-2-yl}amino)benzenesulfonamide; N'-(5-chloro-1,3-benzodioxol-4-yl)-N-(3-…	(M257)PID EPHRINB REV PATHWAY; (M62)PID EPHB FWD PATHWAY	(M5916)HALLMARK APICAL SURFACE	0.0	0.0	0.0	0.0	0.0	0.0	0.0	1.0	1.0	0.0	1.0	0.0	0.0	1.0	0.0	0.0	1.0	0.0	0.0	0.0
EPPK1	83481	symbol	H. sapiens	83481	H. sapiens	EPPK1	epiplakin 1	GO:0051548 negative regulation of keratinocyte migration;GO:1905041 regulation of epithelium regeneration;GO:1990399 epithelium regeneration		Predicted intracellular proteins	Intermediate filaments (Enhanced)				0.0	0.0	0.0	0.0	0.0	0.0	0.0	0.0	0.0	0.0	0.0	0.0	0.0	1.0	0.0	0.0	0.0	0.0	0.0	0.0
ERBB3	2065	symbol	H. sapiens	2065	H. sapiens	ERBB3	erb-b2 receptor tyrosine kinase 3	GO:0014037 Schwann cell differentiation;GO:0021545 cranial nerve development;GO:0061098 positive regulation of protein tyrosine kinase activity	Tyr protein kinase family	Cancer-related genes:Candidate cancer biomarkers; ENZYME proteins:Transferases; Kinases:Tyr protein kinases; Cancer-related genes:Mutated cancer genes; Predicted intracellular proteins; Predicted secreted proteins; Enzymes; Disease related genes; Potential drug targets	Plasma membrane (Supported); Additional: Actin filaments	Tucatinib	(M201)PID ERBB NETWORK PATHWAY; (M175)PID ERBB2 ERBB3 PATHWAY; (M239)PID A6B1 A6B4 INTEGRIN PATHWAY	(M5902)HALLMARK APOPTOSIS; (M5909)HALLMARK MYOGENESIS	0.0	0.0	0.0	0.0	0.0	0.0	0.0	0.0	1.0	0.0	0.0	0.0	0.0	0.0	0.0	0.0	1.0	0.0	0.0	1.0
ERBB4	2066	symbol	H. sapiens	2066	H. sapiens	ERBB4	erb-b2 receptor tyrosine kinase 4	GO:0021551 central nervous system morphogenesis;GO:0072046 establishment of planar polarity involved in nephron morphogenesis;GO:0061026 cardiac muscle tissue regeneration	Tyr protein kinase family	Cancer-related genes:Candidate cancer biomarkers; ENZYME proteins:Transferases; Kinases:Tyr protein kinases; Predicted intracellular proteins; FDA approved drug targets:Small molecule drugs; Enzymes; Disease related genes; Transporters:Transporter channels and pores		Afatinib; Fostamatinib; Brigatinib; Zanubrutinib	(M201)PID ERBB NETWORK PATHWAY; (M13)PID ERBB4 PATHWAY; (M295)SIG PIP3 SIGNALING IN CARDIAC MYOCTES		1.0	0.0	0.0	0.0	1.0	0.0	0.0	0.0	1.0	1.0	0.0	0.0	0.0	1.0	0.0	0.0	1.0	1.0	0.0	1.0
ERCC1	2067	symbol	H. sapiens	2067	H. sapiens	ERCC1	ERCC excision repair 1, endonuclease non-catalytic subunit	GO:0006295 nucleotide-excision repair, DNA incision, 3'-to lesion;GO:0035166 post-embryonic hemopoiesis;GO:0061819 telomeric DNA-containing double minutes formation		Cancer-related genes:Candidate cancer biomarkers; Predicted intracellular proteins; Disease related genes	Nucleoplasm (Enhanced)			(M5949)HALLMARK PEROXISOME; (M5898)HALLMARK DNA REPAIR	1.0	0.0	0.0	0.0	1.0	0.0	0.0	0.0	0.0	0.0	0.0	0.0	0.0	0.0	0.0	0.0	0.0	0.0	0.0	0.0
EREG	2069	symbol	H. sapiens	2069	H. sapiens	EREG	epiregulin	GO:0042700 luteinizing hormone signaling pathway;GO:0048160 primary follicle stage;GO:0001550 ovarian cumulus expansion		Predicted secreted proteins	Vesicles (Approved)		(M201)PID ERBB NETWORK PATHWAY; (M13)PID ERBB4 PATHWAY; (M5883)NABA SECRETED FACTORS	(M5902)HALLMARK APOPTOSIS; (M5932)HALLMARK INFLAMMATORY RESPONSE; (M5950)HALLMARK ALLOGRAFT REJECTION	1.0	0.0	0.0	1.0	0.0	0.0	0.0	0.0	1.0	0.0	0.0	0.0	0.0	1.0	0.0	0.0	1.0	0.0	0.0	1.0
ETNK2	55224	symbol	H. sapiens	55224	H. sapiens	ETNK2	ethanolamine kinase 2	GO:0006646 phosphatidylethanolamine biosynthetic process;GO:0046337 phosphatidylethanolamine metabolic process;GO:0009791 post-embryonic development		ENZYME proteins:Transferases; Predicted intracellular proteins; Enzymes					0.0	0.0	0.0	0.0	1.0	0.0	0.0	0.0	0.0	0.0	0.0	0.0	0.0	0.0	0.0	0.0	0.0	0.0	0.0	0.0
EXOC6	54536	symbol	H. sapiens	54536	H. sapiens	EXOC6	exocyst complex component 6	GO:0090522 vesicle tethering involved in exocytosis;GO:0099022 vesicle tethering;GO:0006903 vesicle targeting		Transporters:Transporter channels and pores; Predicted intracellular proteins	Vesicles (Supported); Additional: Nucleoplasm		(M16)PID INSULIN PATHWAY; (M67)PID ARF6 TRAFFICKING PATHWAY		0.0	0.0	0.0	0.0	0.0	0.0	0.0	0.0	0.0	0.0	0.0	0.0	0.0	0.0	0.0	0.0	0.0	0.0	0.0	0.0
F2R	2149	symbol	H. sapiens	2149	H. sapiens	F2R	coagulation factor II thrombin receptor	GO:1900134 negative regulation of renin secretion into blood stream;GO:0007529 establishment of synaptic specificity at neuromuscular junction;GO:0099552 trans-synaptic signaling by lipid, modulating synaptic transmission		Predicted intracellular proteins; FDA approved drug targets:Small molecule drugs; G-protein coupled receptors:GPCRs excl olfactory receptors		Streptokinase; SR-123781A; Vorapaxar; Thrombin	(M238)PID THROMBIN PAR1 PATHWAY	(M5902)HALLMARK APOPTOSIS; (M5939)HALLMARK P53 PATHWAY; (M5950)HALLMARK ALLOGRAFT REJECTION	0.0	0.0	1.0	0.0	0.0	1.0	0.0	0.0	0.0	0.0	0.0	0.0	0.0	1.0	0.0	0.0	1.0	0.0	0.0	0.0
F2RL1	2150	symbol	H. sapiens	2150	H. sapiens	F2RL1	F2R like trypsin receptor 1	GO:0070962 positive regulation of neutrophil mediated killing of bacterium;GO:0070963 positive regulation of neutrophil mediated killing of gram-negative bacterium;GO:0070960 positive regulation of neutrophil mediated cytotoxicity		Transporters; G-protein coupled receptors:GPCRs excl olfactory receptors	Plasma membrane (Approved)		(M15743)ST GA12 PATHWAY	(M5890)HALLMARK TNFA SIGNALING VIA NFKB; (M5953)HALLMARK KRAS SIGNALING UP	1.0	0.0	0.0	0.0	0.0	0.0	0.0	0.0	0.0	0.0	1.0	0.0	0.0	1.0	0.0	0.0	0.0	0.0	0.0	0.0
F2RL2	2151	symbol	H. sapiens	2151	H. sapiens	F2RL2	coagulation factor II thrombin receptor like 2	GO:0070493 thrombin-activated receptor signaling pathway;GO:0035025 positive regulation of Rho protein signal transduction;GO:0051482 positive regulation of cytosolic calcium ion concentration involved in phospholipase C-activating G protein-coupled signaling pathway		G-protein coupled receptors:GPCRs excl olfactory receptors			(M138)PID THROMBIN PAR4 PATHWAY; (M15743)ST GA12 PATHWAY; (M193)PID NEPHRIN NEPH1 PATHWAY	(M5946)HALLMARK COAGULATION; (M5947)HALLMARK IL2 STAT5 SIGNALING	0.0	0.0	1.0	0.0	0.0	0.0	0.0	0.0	0.0	0.0	0.0	0.0	0.0	0.0	0.0	0.0	0.0	0.0	0.0	0.0
FADS2	9415	symbol	H. sapiens	9415	H. sapiens	FADS2	fatty acid desaturase 2	GO:0036109 alpha-linolenic acid metabolic process;GO:0043651 linoleic acid metabolic process;GO:0006636 unsaturated fatty acid biosynthetic process		Predicted intracellular proteins; Enzymes; ENZYME proteins:Oxidoreductases; FDA approved drug targets:Small molecule drugs		alpha-Linolenic acid		(M5892)HALLMARK CHOLESTEROL HOMEOSTASIS; (M5948)HALLMARK BILE ACID METABOLISM; (M5924)HALLMARK MTORC1 SIGNALING	0.0	0.0	0.0	0.0	0.0	0.0	0.0	0.0	0.0	0.0	0.0	0.0	0.0	0.0	0.0	0.0	0.0	0.0	0.0	0.0
FAHD2B	151313	symbol	H. sapiens	151313	H. sapiens	FAHD2B	fumarylacetoacetate hydrolase domain containing 2B			Predicted intracellular proteins					0.0	0.0	0.0	0.0	0.0	0.0	0.0	0.0	0.0	0.0	0.0	0.0	0.0	0.0	0.0	0.0	0.0	0.0	0.0	0.0
FAM107B	83641	symbol	H. sapiens	83641	H. sapiens	FAM107B	family with sequence similarity 107 member B			Predicted intracellular proteins	Nucleoplasm (Supported); Additional: Golgi apparatus				0.0	0.0	0.0	0.0	0.0	0.0	0.0	0.0	0.0	0.0	0.0	0.0	0.0	0.0	0.0	0.0	0.0	0.0	0.0	0.0
FAM189A1	23359	symbol	H. sapiens	23359	H. sapiens	FAM189A1	family with sequence similarity 189 member A1			Transporters:Transporter channels and pores; Predicted intracellular proteins	Nucleoplasm (Approved)				0.0	0.0	0.0	0.0	0.0	0.0	0.0	0.0	0.0	0.0	0.0	0.0	0.0	0.0	0.0	0.0	0.0	0.0	0.0	0.0
FAM193B	54540	symbol	H. sapiens	54540	H. sapiens	FAM193B	family with sequence similarity 193 member B			Predicted intracellular proteins	Nucleoli;Nucleoplasm (Enhanced)				0.0	0.0	0.0	0.0	0.0	0.0	0.0	0.0	0.0	0.0	0.0	0.0	0.0	0.0	0.0	0.0	0.0	0.0	0.0	0.0
FAM212B	55924	gene_synonym	H. sapiens	55924	H. sapiens	INKA2	inka box actin regulator 2	GO:0043086 negative regulation of catalytic activity;GO:0044092 negative regulation of molecular function;GO:0050790 regulation of catalytic activity		Predicted intracellular proteins	Nucleoplasm (Supported); Additional: Nucleoli;Vesicles				0.0	0.0	0.0	0.0	0.0	0.0	0.0	0.0	0.0	0.0	0.0	0.0	0.0	0.0	0.0	0.0	0.0	0.0	0.0	0.0
FAM212B-AS1	100506343	gene_synonym	H. sapiens	100506343	H. sapiens	INKA2-AS1	INKA2 antisense RNA 1								0.0	0.0	0.0	0.0	0.0	0.0	0.0	0.0	0.0	0.0	0.0	0.0	0.0	0.0	0.0	0.0	0.0	0.0	0.0	0.0
FAM43A	131583	symbol	H. sapiens	131583	H. sapiens	FAM43A	family with sequence similarity 43 member A			Predicted intracellular proteins	Vesicles (Approved)				0.0	0.0	0.0	0.0	0.0	0.0	0.0	0.0	0.0	0.0	0.0	0.0	0.0	0.0	0.0	0.0	0.0	0.0	0.0	0.0
FAM46B	115572	gene_synonym	H. sapiens	115572	H. sapiens	TENT5B	terminal nucleotidyltransferase 5B	GO:0048255 mRNA stabilization;GO:1902373 negative regulation of mRNA catabolic process;GO:0043489 RNA stabilization		Predicted secreted proteins					0.0	0.0	0.0	0.0	0.0	0.0	0.0	0.0	0.0	0.0	0.0	0.0	0.0	0.0	0.0	0.0	0.0	0.0	0.0	0.0
FAM49B	51571	gene_synonym	H. sapiens	51571	H. sapiens	CYRIB	CYFIP related Rac1 interactor B	GO:2000567 regulation of memory T cell activation;GO:2000568 positive regulation of memory T cell activation;GO:0035709 memory T cell activation		Predicted intracellular proteins	Nucleoplasm (Approved); Additional: Cytosol				0.0	0.0	1.0	0.0	0.0	0.0	0.0	0.0	0.0	0.0	1.0	0.0	0.0	0.0	0.0	0.0	0.0	0.0	0.0	0.0
FAM60A	58516	gene_synonym	H. sapiens	58516	H. sapiens	SINHCAF	SIN3-HDAC complex associated factor	GO:0030336 negative regulation of cell migration;GO:2000146 negative regulation of cell motility;GO:0051271 negative regulation of cellular component movement		Predicted intracellular proteins	Nucleoplasm (Approved); Additional: Cytosol				0.0	0.0	0.0	1.0	0.0	0.0	0.0	0.0	0.0	0.0	0.0	0.0	0.0	0.0	0.0	0.0	0.0	0.0	0.0	0.0
FAM96B	51647	gene_synonym	H. sapiens	51647	H. sapiens	CIAO2B	cytosolic iron-sulfur assembly component 2B	GO:0106035 protein maturation by [4Fe-4S] cluster transfer;GO:0097428 protein maturation by iron-sulfur cluster transfer;GO:0016226 iron-sulfur cluster assembly		Predicted intracellular proteins	Cytosol;Nucleoplasm (Supported)				0.0	0.0	0.0	0.0	0.0	0.0	0.0	0.0	0.0	0.0	0.0	0.0	0.0	0.0	0.0	0.0	0.0	0.0	0.0	0.0
FANCE	2178	symbol	H. sapiens	2178	H. sapiens	FANCE	FA complementation group E	GO:0036297 interstrand cross-link repair;GO:0006281 DNA repair;GO:0006974 cellular response to DNA damage stimulus		Predicted intracellular proteins; Disease related genes; Cancer-related genes	Nucleoplasm (Supported)		(M258)PID BARD1 PATHWAY; (M1)PID FANCONI PATHWAY		1.0	0.0	0.0	0.0	0.0	0.0	0.0	0.0	0.0	0.0	0.0	0.0	0.0	0.0	0.0	0.0	0.0	0.0	0.0	0.0
FAR2	55711	symbol	H. sapiens	55711	H. sapiens	FAR2	fatty acyl-CoA reductase 2	GO:0010025 wax biosynthetic process;GO:0010166 wax metabolic process;GO:0035336 long-chain fatty-acyl-CoA metabolic process		Predicted intracellular proteins; Enzymes; ENZYME proteins:Oxidoreductases	Golgi apparatus (Approved); Additional: Nucleoli				0.0	0.0	0.0	0.0	0.0	0.0	0.0	0.0	0.0	0.0	0.0	0.0	0.0	0.0	0.0	0.0	0.0	0.0	0.0	0.0
FASN	2194	symbol	H. sapiens	2194	H. sapiens	FASN	fatty acid synthase	GO:0030223 neutrophil differentiation;GO:0008611 ether lipid biosynthetic process;GO:0046504 glycerol ether biosynthetic process		Cancer-related genes:Candidate cancer biomarkers; ENZYME proteins:Transferases; ENZYME proteins:Lyases; Predicted intracellular proteins; FDA approved drug targets:Small molecule drugs; ENZYME proteins:Hydrolases; ENZYME proteins:Oxidoreductases; Enzymes	Cytosol;Plasma membrane (Enhanced)	Cerulenin; Orlistat	(M236)PID DELTA NP63 PATHWAY; (M19)PID P73PATHWAY	(M5892)HALLMARK CHOLESTEROL HOMEOSTASIS; (M5935)HALLMARK FATTY ACID METABOLISM; (M5906)HALLMARK ESTROGEN RESPONSE EARLY	1.0	0.0	0.0	0.0	0.0	0.0	0.0	0.0	0.0	0.0	0.0	0.0	0.0	0.0	1.0	0.0	0.0	1.0	0.0	0.0
FAXC	84553	symbol	H. sapiens	84553	H. sapiens	FAXC	failed axon connections homolog, metaxin like GST domain containing			Predicted intracellular proteins	Nucleoplasm (Approved)				0.0	0.0	0.0	0.0	0.0	0.0	0.0	0.0	0.0	0.0	0.0	0.0	0.0	0.0	0.0	0.0	0.0	0.0	0.0	0.0
FBN2	2201	symbol	H. sapiens	2201	H. sapiens	FBN2	fibrillin 2	GO:0035583 sequestering of TGFbeta in extracellular matrix;GO:0071694 maintenance of protein location in extracellular region;GO:0060346 bone trabecula formation		Cancer-related genes:Mutational cancer driver genes; Predicted secreted proteins; Disease related genes; Predicted intracellular proteins	Cytosol (Approved); Additional: Nucleoplasm	Calcium citrate; Calcium Phosphate; Calcium phosphate dihydrate	(M3008)NABA ECM GLYCOPROTEINS; (M5884)NABA CORE MATRISOME; (M5889)NABA MATRISOME	(M5930)HALLMARK EPITHELIAL MESENCHYMAL TRANSITION	0.0	0.0	0.0	0.0	1.0	0.0	1.0	0.0	0.0	0.0	0.0	1.0	0.0	0.0	1.0	0.0	0.0	0.0	0.0	0.0
FBXL14	144699	symbol	H. sapiens	144699	H. sapiens	FBXL14	F-box and leucine rich repeat protein 14	GO:0031146 SCF-dependent proteasomal ubiquitin-dependent protein catabolic process;GO:0043161 proteasome-mediated ubiquitin-dependent protein catabolic process;GO:0010498 proteasomal protein catabolic process		Predicted intracellular proteins	Golgi apparatus;Nucleoplasm (Approved); Additional: Cytosol				0.0	0.0	0.0	0.0	0.0	0.0	0.0	0.0	0.0	0.0	0.0	0.0	0.0	0.0	0.0	0.0	0.0	0.0	0.0	1.0
FBXL19	54620	symbol	H. sapiens	54620	H. sapiens	FBXL19	F-box and leucine rich repeat protein 19	GO:0016577 histone demethylation;GO:0006482 protein demethylation;GO:0008214 protein dealkylation		Predicted intracellular proteins	Nucleoplasm (Approved)				0.0	0.0	0.0	0.0	0.0	0.0	0.0	0.0	0.0	0.0	0.0	0.0	0.0	0.0	0.0	0.0	0.0	0.0	0.0	1.0
FBXO2	26232	symbol	H. sapiens	26232	H. sapiens	FBXO2	F-box protein 2	GO:0006516 glycoprotein catabolic process;GO:0031146 SCF-dependent proteasomal ubiquitin-dependent protein catabolic process;GO:0030433 ubiquitin-dependent ERAD pathway		Predicted intracellular proteins	Cytosol;Nucleoplasm (Approved)				0.0	0.0	0.0	0.0	0.0	0.0	0.0	0.0	0.0	0.0	0.0	0.0	0.0	0.0	0.0	0.0	0.0	0.0	0.0	1.0
FEM1A	55527	symbol	H. sapiens	55527	H. sapiens	FEM1A	fem-1 homolog A	GO:0140627 ubiquitin-dependent protein catabolic process via the C-end degron rule pathway;GO:0051438 regulation of ubiquitin-protein transferase activity;GO:0050729 positive regulation of inflammatory response		Predicted intracellular proteins	Golgi apparatus;Nucleoplasm (Supported); Additional: Cytosol				0.0	0.0	0.0	0.0	0.0	0.0	0.0	0.0	0.0	0.0	0.0	0.0	0.0	0.0	0.0	0.0	0.0	0.0	0.0	0.0
FENDRR	400550	symbol	H. sapiens	400550	H. sapiens	FENDRR	FOXF1 adjacent non-coding developmental regulatory RNA								0.0	0.0	0.0	0.0	0.0	0.0	0.0	0.0	0.0	0.0	0.0	0.0	0.0	0.0	0.0	0.0	0.0	0.0	0.0	0.0
FEZF2	55079	symbol	H. sapiens	55079	H. sapiens	FEZF2	FEZ family zinc finger 2	GO:0021797 forebrain anterior/posterior pattern specification;GO:0021853 cerebral cortex GABAergic interneuron migration;GO:0021902 commitment of neuronal cell to specific neuron type in forebrain		Transcription factors:Zinc-coordinating DNA-binding domains; Predicted intracellular proteins					0.0	0.0	0.0	1.0	0.0	0.0	0.0	0.0	0.0	1.0	1.0	0.0	0.0	0.0	0.0	0.0	0.0	0.0	0.0	0.0
FGF5	2250	symbol	H. sapiens	2250	H. sapiens	FGF5	fibroblast growth factor 5	GO:0023019 signal transduction involved in regulation of gene expression;GO:0008543 fibroblast growth factor receptor signaling pathway;GO:0051781 positive regulation of cell division		Predicted secreted proteins; Disease related genes; RAS pathway related proteins	Nucleoli fibrillar center (Supported); Additional: Cytosol;Nucleoplasm		(M5883)NABA SECRETED FACTORS; (M5885)NABA MATRISOME ASSOCIATED; (M5889)NABA MATRISOME		0.0	0.0	0.0	0.0	0.0	1.0	0.0	0.0	0.0	0.0	0.0	0.0	0.0	0.0	0.0	1.0	1.0	0.0	1.0	1.0
FHOD1	29109	symbol	H. sapiens	29109	H. sapiens	FHOD1	formin homology 2 domain containing 1	GO:0051660 establishment of centrosome localization;GO:0051639 actin filament network formation;GO:0007097 nuclear migration		Predicted intracellular proteins	Cytosol (Supported)				0.0	0.0	0.0	0.0	0.0	0.0	0.0	0.0	0.0	0.0	0.0	0.0	0.0	0.0	0.0	0.0	0.0	0.0	0.0	0.0
FKBP4	2288	symbol	H. sapiens	2288	H. sapiens	FKBP4	FKBP prolyl isomerase 4	GO:0031115 negative regulation of microtubule polymerization;GO:0006825 copper ion transport;GO:0031111 negative regulation of microtubule polymerization or depolymerization		Predicted intracellular proteins; ENZYME proteins:Isomerase; Enzymes	Cytosol (Enhanced); Additional: Nucleoplasm		(M58)PID AR PATHWAY; (M115)PID REG GR PATHWAY	(M5941)HALLMARK UV RESPONSE UP; (M5906)HALLMARK ESTROGEN RESPONSE EARLY; (M5907)HALLMARK ESTROGEN RESPONSE LATE	1.0	0.0	0.0	0.0	0.0	0.0	0.0	0.0	0.0	0.0	1.0	0.0	0.0	0.0	0.0	0.0	0.0	0.0	0.0	0.0
FLJ16779	100192386	symbol	H. sapiens	100192386	H. sapiens	FLJ16779	uncharacterized LOC100192386								0.0	0.0	0.0	0.0	0.0	0.0	0.0	0.0	0.0	0.0	0.0	0.0	0.0	0.0	0.0	0.0	0.0	0.0	0.0	0.0
FLRT1	23769	symbol	H. sapiens	23769	H. sapiens	FLRT1	fibronectin leucine rich transmembrane protein 1	GO:0008543 fibroblast growth factor receptor signaling pathway;GO:0044344 cellular response to fibroblast growth factor stimulus;GO:0071774 response to fibroblast growth factor							0.0	0.0	0.0	0.0	0.0	0.0	0.0	0.0	0.0	0.0	1.0	0.0	0.0	0.0	0.0	0.0	1.0	0.0	0.0	0.0
FLT1	2321	symbol	H. sapiens	2321	H. sapiens	FLT1	fms related receptor tyrosine kinase 1	GO:0036323 vascular endothelial growth factor receptor-1 signaling pathway;GO:1990384 hyaloid vascular plexus regression;GO:0060033 anatomical structure regression	Tyr protein kinase family	Cancer-related genes:Candidate cancer biomarkers; ENZYME proteins:Transferases; Kinases:Tyr protein kinases; RAS pathway related proteins; Predicted intracellular proteins; Predicted secreted proteins; FDA approved drug targets:Small molecule drugs; Enzymes; Disease related genes	Plasma membrane (Supported); Additional: Actin filaments	Sorafenib; Sunitinib; Vatalanib; TG-100801; OSI-930; Denibulin; ABT-869; IMC-1C11; Pazopanib; Axitinib; N-(4-chlorophenyl)-2-[(pyridin-4-ylmethyl)amino]benzamide; Regorafenib; Lenvatinib; Nintedanib; Polaprezinc; Foreskin fibroblast (neonatal); Fostamatinib; Selpercatinib	(M137)PID VEGF VEGFR PATHWAY; (M226)PID VEGFR1 PATHWAY; (M33)PID GLYPICAN 1PATHWAY		0.0	0.0	1.0	0.0	1.0	0.0	1.0	0.0	0.0	0.0	1.0	0.0	0.0	1.0	0.0	0.0	1.0	0.0	0.0	0.0
FOS	2353	symbol	H. sapiens	2353	H. sapiens	FOS	Fos proto-oncogene, AP-1 transcription factor subunit	GO:0001661 conditioned taste aversion;GO:0009629 response to gravity;GO:0051412 response to corticosterone		Cancer-related genes:Candidate cancer biomarkers; Predicted intracellular proteins; Transcription factors:Basic domains	Nucleoplasm (Supported)	Nadroparin	(M134)PID TCR RAS PATHWAY; (M206)PID PDGFRA PATHWAY; (M268)PID S1P S1P2 PATHWAY	(M5941)HALLMARK UV RESPONSE UP; (M5890)HALLMARK TNFA SIGNALING VIA NFKB; (M5891)HALLMARK HYPOXIA	1.0	0.0	1.0	0.0	0.0	1.0	0.0	0.0	1.0	0.0	0.0	0.0	0.0	0.0	0.0	1.0	1.0	0.0	1.0	1.0
FOSB	2354	symbol	H. sapiens	2354	H. sapiens	FOSB	FosB proto-oncogene, AP-1 transcription factor subunit	GO:0051412 response to corticosterone;GO:0014072 response to isoquinoline alkaloid;GO:0043278 response to morphine		Predicted intracellular proteins; Transcription factors:Basic domains	Nucleoplasm (Supported); Additional: Vesicles		(M167)PID AP1 PATHWAY	(M5941)HALLMARK UV RESPONSE UP; (M5890)HALLMARK TNFA SIGNALING VIA NFKB	1.0	0.0	0.0	0.0	0.0	0.0	0.0	0.0	0.0	0.0	0.0	0.0	0.0	0.0	0.0	0.0	1.0	0.0	0.0	0.0
FOSL2	2355	symbol	H. sapiens	2355	H. sapiens	FOSL2	FOS like 2, AP-1 transcription factor subunit	GO:0003334 keratinocyte development;GO:0048146 positive regulation of fibroblast proliferation;GO:0048145 regulation of fibroblast proliferation		Predicted intracellular proteins; Transcription factors:Basic domains	Nucleoplasm (Enhanced)		(M65)PID FRA PATHWAY; (M236)PID DELTA NP63 PATHWAY; (M167)PID AP1 PATHWAY	(M5890)HALLMARK TNFA SIGNALING VIA NFKB; (M5891)HALLMARK HYPOXIA	0.0	0.0	0.0	0.0	0.0	0.0	0.0	0.0	0.0	0.0	0.0	0.0	0.0	0.0	0.0	0.0	0.0	0.0	0.0	0.0
FOXC2	2303	symbol	H. sapiens	2303	H. sapiens	FOXC2	forkhead box C2	GO:1902257 negative regulation of apoptotic process involved in outflow tract morphogenesis;GO:0048342 paraxial mesodermal cell differentiation;GO:0048343 paraxial mesodermal cell fate commitment		Predicted intracellular proteins; Disease related genes; Transcription factors:Helix-turn-helix domains	Nuclear bodies;Nucleoplasm (Supported)			(M5930)HALLMARK EPITHELIAL MESENCHYMAL TRANSITION	1.0	0.0	0.0	0.0	1.0	0.0	1.0	0.0	1.0	0.0	0.0	1.0	0.0	1.0	1.0	0.0	1.0	1.0	1.0	0.0
FOXC2-AS1	103752587	symbol	H. sapiens	103752587	H. sapiens	FOXC2-AS1	FOXC2 antisense RNA 1								0.0	0.0	0.0	0.0	0.0	0.0	0.0	0.0	0.0	0.0	0.0	0.0	0.0	0.0	0.0	0.0	0.0	0.0	0.0	0.0
FOXD2	2306	symbol	H. sapiens	2306	H. sapiens	FOXD2	forkhead box D2	GO:0045944 positive regulation of transcription by RNA polymerase II;GO:0045893 positive regulation of transcription, DNA-templated;GO:1903508 positive regulation of nucleic acid-templated transcription		Predicted intracellular proteins; Transcription factors:Helix-turn-helix domains					0.0	0.0	0.0	0.0	0.0	0.0	0.0	0.0	0.0	0.0	0.0	0.0	0.0	0.0	0.0	0.0	0.0	0.0	0.0	0.0
FOXE1	2304	symbol	H. sapiens	2304	H. sapiens	FOXE1	forkhead box E1	GO:0060465 pharynx development;GO:0060023 soft palate development;GO:0060022 hard palate development		Predicted intracellular proteins; Disease related genes; Transcription factors:Helix-turn-helix domains					0.0	0.0	0.0	0.0	1.0	0.0	0.0	0.0	0.0	0.0	0.0	0.0	0.0	0.0	0.0	0.0	0.0	0.0	0.0	0.0
FOXE3	2301	symbol	H. sapiens	2301	H. sapiens	FOXE3	forkhead box E3	GO:0002930 trabecular meshwork development;GO:0097166 lens epithelial cell proliferation;GO:2001109 regulation of lens epithelial cell proliferation		Predicted intracellular proteins; Disease related genes; Transcription factors:Helix-turn-helix domains					0.0	0.0	0.0	1.0	0.0	0.0	1.0	0.0	0.0	0.0	0.0	0.0	0.0	0.0	0.0	0.0	0.0	0.0	0.0	0.0
FOXK1	221937	symbol	H. sapiens	221937	H. sapiens	FOXK1	forkhead box K1	GO:0006735 NADH regeneration;GO:0061621 canonical glycolysis;GO:0061718 glucose catabolic process to pyruvate		Predicted intracellular proteins; Transcription factors:Helix-turn-helix domains	Nucleoplasm (Supported); Additional: Nucleoli fibrillar center				0.0	1.0	0.0	0.0	0.0	0.0	0.0	0.0	1.0	0.0	0.0	0.0	0.0	0.0	0.0	0.0	0.0	0.0	0.0	0.0
FOXP1	27086	symbol	H. sapiens	27086	H. sapiens	FOXP1	forkhead box P1	GO:0032745 positive regulation of interleukin-21 production;GO:0061470 T follicular helper cell differentiation;GO:0036301 macrophage colony-stimulating factor production		Predicted intracellular proteins; Disease related genes; Cancer-related genes; Transcription factors:Helix-turn-helix domains	Nucleoplasm (Enhanced)				1.0	0.0	0.0	0.0	1.0	0.0	0.0	0.0	0.0	0.0	0.0	1.0	0.0	1.0	0.0	0.0	0.0	1.0	0.0	0.0
FOXS1	2307	symbol	H. sapiens	2307	H. sapiens	FOXS1	forkhead box S1	GO:0040018 positive regulation of multicellular organism growth;GO:0050885 neuromuscular process controlling balance;GO:0040014 regulation of multicellular organism growth		Predicted intracellular proteins; Transcription factors:Helix-turn-helix domains	Cytosol;Nucleoplasm (Approved)				0.0	0.0	0.0	0.0	0.0	0.0	0.0	0.0	0.0	0.0	0.0	0.0	0.0	1.0	0.0	0.0	0.0	0.0	0.0	0.0
FRMD4A	55691	symbol	H. sapiens	55691	H. sapiens	FRMD4A	FERM domain containing 4A	GO:0090162 establishment of epithelial cell polarity;GO:0050709 negative regulation of protein secretion;GO:0051224 negative regulation of protein transport		Predicted intracellular proteins; Disease related genes	Golgi apparatus (Approved); Additional: Nucleoplasm				0.0	0.0	0.0	0.0	0.0	0.0	0.0	0.0	0.0	0.0	0.0	0.0	0.0	0.0	0.0	0.0	0.0	0.0	0.0	0.0
FSTL3	10272	symbol	H. sapiens	10272	H. sapiens	FSTL3	follistatin like 3	GO:0032926 negative regulation of activin receptor signaling pathway;GO:0030325 adrenal gland development;GO:0032925 regulation of activin receptor signaling pathway		Predicted intracellular proteins; Disease related genes; Predicted secreted proteins; Cancer-related genes	Nucleoplasm (Supported)		(M5883)NABA SECRETED FACTORS; (M5885)NABA MATRISOME ASSOCIATED; (M5889)NABA MATRISOME	(M5930)HALLMARK EPITHELIAL MESENCHYMAL TRANSITION	1.0	0.0	0.0	1.0	0.0	0.0	0.0	0.0	0.0	0.0	0.0	0.0	0.0	0.0	1.0	0.0	0.0	1.0	0.0	0.0
FZD2	2535	symbol	H. sapiens	2535	H. sapiens	FZD2	frizzled class receptor 2	GO:0003150 muscular septum morphogenesis;GO:0003149 membranous septum morphogenesis;GO:0060022 hard palate development		Cancer-related genes:Candidate cancer biomarkers; G-protein coupled receptors:Family fz/smo receptors; G-protein coupled receptors:GPCRs excl olfactory receptors	Nuclear bodies;Nucleoplasm (Approved); Additional: Cell Junctions		(M77)PID WNT SIGNALING PATHWAY; (M23)PID WNT NONCANONICAL PATHWAY; (M5493)WNT SIGNALING	(M5942)HALLMARK UV RESPONSE DN	1.0	0.0	0.0	0.0	1.0	1.0	1.0	0.0	1.0	0.0	0.0	0.0	0.0	0.0	0.0	1.0	0.0	0.0	1.0	1.0
FZD9	8326	symbol	H. sapiens	8326	H. sapiens	FZD9	frizzled class receptor 9	GO:1903910 negative regulation of receptor clustering;GO:1904394 negative regulation of skeletal muscle acetylcholine-gated channel clustering;GO:1990523 bone regeneration		G-protein coupled receptors:Family fz/smo receptors; G-protein coupled receptors:GPCRs excl olfactory receptors; CD markers			(M77)PID WNT SIGNALING PATHWAY		0.0	0.0	0.0	0.0	0.0	1.0	0.0	0.0	0.0	0.0	0.0	0.0	0.0	0.0	1.0	1.0	0.0	0.0	1.0	0.0
G6PD	2539	symbol	H. sapiens	2539	H. sapiens	G6PD	glucose-6-phosphate dehydrogenase	GO:0010731 protein glutathionylation;GO:0010732 regulation of protein glutathionylation;GO:0010734 negative regulation of protein glutathionylation		Cancer-related genes:Candidate cancer biomarkers; Predicted intracellular proteins; Enzymes; ENZYME proteins:Oxidoreductases; Disease related genes; Potential drug targets	Cytosol (Enhanced); Additional: Centriolar satellite	Glycolic acid; Nicotinamide adenine dinucleotide phosphate; 16-Bromoepiandrosterone; Artenimol		(M5938)HALLMARK REACTIVE OXYGEN SPECIES PATHWAY; (M5924)HALLMARK MTORC1 SIGNALING; (M5937)HALLMARK GLYCOLYSIS	1.0	0.0	0.0	1.0	0.0	0.0	0.0	0.0	1.0	1.0	0.0	0.0	0.0	0.0	0.0	0.0	0.0	0.0	0.0	0.0
GADD45A	1647	symbol	H. sapiens	1647	H. sapiens	GADD45A	growth arrest and DNA damage inducible alpha	GO:0033140 negative regulation of peptidyl-serine phosphorylation of STAT protein;GO:0033139 regulation of peptidyl-serine phosphorylation of STAT protein;GO:0042501 serine phosphorylation of STAT protein		Cancer-related genes:Candidate cancer biomarkers; Predicted intracellular proteins	Nuclear speckles (Supported)		(M20)PID P38 MKK3 6PATHWAY; (M242)PID AURORA A PATHWAY; (M12012)ST P38 MAPK PATHWAY	(M5902)HALLMARK APOPTOSIS; (M5890)HALLMARK TNFA SIGNALING VIA NFKB; (M5905)HALLMARK ADIPOGENESIS	0.0	0.0	1.0	0.0	0.0	0.0	0.0	0.0	0.0	0.0	0.0	0.0	0.0	1.0	0.0	0.0	0.0	0.0	1.0	0.0
GALNT2	2590	symbol	H. sapiens	2590	H. sapiens	GALNT2	polypeptide N-acetylgalactosaminyltransferase 2	GO:0018243 protein O-linked glycosylation via threonine;GO:0018242 protein O-linked glycosylation via serine;GO:0016266 O-glycan processing		ENZYME proteins:Transferases; Predicted intracellular proteins; Enzymes	Golgi apparatus (Supported)				0.0	0.0	0.0	0.0	0.0	0.0	0.0	0.0	0.0	0.0	0.0	0.0	0.0	0.0	0.0	0.0	0.0	0.0	0.0	0.0
GALNT3	2591	symbol	H. sapiens	2591	H. sapiens	GALNT3	polypeptide N-acetylgalactosaminyltransferase 3	GO:0018243 protein O-linked glycosylation via threonine;GO:0018242 protein O-linked glycosylation via serine;GO:0016266 O-glycan processing		ENZYME proteins:Transferases; Predicted intracellular proteins; Enzymes; Disease related genes; Potential drug targets	Golgi apparatus (Supported)			(M5953)HALLMARK KRAS SIGNALING UP	0.0	0.0	0.0	0.0	0.0	0.0	0.0	0.0	0.0	0.0	0.0	0.0	0.0	0.0	0.0	0.0	1.0	0.0	0.0	0.0
GATSL3	652968	gene_synonym	H. sapiens	652968	H. sapiens	CASTOR1	cytosolic arginine sensor for mTORC1 subunit 1	GO:1903577 cellular response to L-arginine;GO:1903576 response to L-arginine;GO:1904262 negative regulation of TORC1 signaling		Predicted intracellular proteins					1.0	0.0	0.0	0.0	0.0	0.0	0.0	1.0	0.0	0.0	0.0	0.0	0.0	0.0	0.0	0.0	0.0	0.0	0.0	0.0
GBX2	2637	symbol	H. sapiens	2637	H. sapiens	GBX2	gastrulation brain homeobox 2	GO:0021568 rhombomere 2 development;GO:0021555 midbrain-hindbrain boundary morphogenesis;GO:0021546 rhombomere development		Predicted intracellular proteins; Transcription factors:Helix-turn-helix domains	Nucleoplasm (Approved)				1.0	0.0	0.0	0.0	1.0	0.0	1.0	0.0	0.0	1.0	1.0	0.0	1.0	1.0	0.0	0.0	0.0	1.0	0.0	0.0
GCAT	23464	symbol	H. sapiens	23464	H. sapiens	GCAT	glycine C-acetyltransferase	GO:0019518 L-threonine catabolic process to glycine;GO:0006567 threonine catabolic process;GO:0006566 threonine metabolic process		ENZYME proteins:Transferases; Predicted intracellular proteins; Enzymes	Nucleoplasm (Supported); Additional: Mitochondria;Nuclear speckles	Pyridoxal phosphate; Glycine			0.0	0.0	0.0	0.0	0.0	0.0	0.0	1.0	0.0	0.0	0.0	0.0	0.0	0.0	0.0	0.0	0.0	0.0	0.0	0.0
GCHFR	2644	symbol	H. sapiens	2644	H. sapiens	GCHFR	GTP cyclohydrolase I feedback regulator	GO:0043095 regulation of GTP cyclohydrolase I activity;GO:0043105 negative regulation of GTP cyclohydrolase I activity;GO:0042133 neurotransmitter metabolic process		Predicted intracellular proteins	Nucleoplasm (Supported)				0.0	0.0	0.0	0.0	0.0	0.0	0.0	0.0	0.0	0.0	0.0	0.0	0.0	0.0	0.0	0.0	0.0	0.0	0.0	0.0
GCN1	10985	symbol	H. sapiens	10985	H. sapiens	GCN1	GCN1 activator of EIF2AK4	GO:1990253 cellular response to leucine starvation;GO:0036003 positive regulation of transcription from RNA polymerase II promoter in response to stress;GO:0034198 cellular response to amino acid starvation		Predicted intracellular proteins	Cytosol (Enhanced)				1.0	0.0	0.0	0.0	0.0	0.0	0.0	1.0	0.0	0.0	0.0	0.0	0.0	0.0	0.0	0.0	0.0	0.0	0.0	0.0
GCSH	2653	symbol	H. sapiens	2653	H. sapiens	GCSH	glycine cleavage system protein H	GO:0006546 glycine catabolic process;GO:0019464 glycine decarboxylation via glycine cleavage system;GO:0009249 protein lipoylation		Predicted intracellular proteins; Disease related genes	Vesicles (Approved)	6-(Hydroxyethyldithio)-8-(Aminomethylthio)Octanoic Acid; Dihydrolipoic Acid			0.0	0.0	0.0	0.0	0.0	0.0	0.0	1.0	0.0	0.0	0.0	0.0	0.0	0.0	0.0	0.0	0.0	0.0	0.0	0.0
GDF15	9518	symbol	H. sapiens	9518	H. sapiens	GDF15	growth differentiation factor 15	GO:0060400 negative regulation of growth hormone receptor signaling pathway;GO:0002023 reduction of food intake in response to dietary excess;GO:0060398 regulation of growth hormone receptor signaling pathway		Cancer-related genes:Candidate cancer biomarkers; Predicted intracellular proteins; Predicted secreted proteins; Disease related genes	Golgi apparatus (Enhanced)		(M256)PID TAP63 PATHWAY; (M19)PID P73PATHWAY; (M145)PID P53 DOWNSTREAM PATHWAY		0.0	0.0	0.0	0.0	0.0	0.0	0.0	0.0	1.0	0.0	0.0	0.0	0.0	0.0	0.0	0.0	1.0	0.0	1.0	0.0
GFER	2671	symbol	H. sapiens	2671	H. sapiens	GFER	growth factor, augmenter of liver regeneration	GO:0001889 liver development;GO:0061008 hepaticobiliary system development;GO:0048732 gland development		Predicted intracellular proteins; Enzymes; ENZYME proteins:Oxidoreductases; Disease related genes; Potential drug targets	Cytosol;Mitochondria (Enhanced)	Flavin adenine dinucleotide			0.0	0.0	0.0	0.0	0.0	0.0	0.0	0.0	0.0	0.0	0.0	0.0	0.0	0.0	0.0	0.0	0.0	0.0	0.0	0.0
GGT5	2687	symbol	H. sapiens	2687	H. sapiens	GGT5	gamma-glutamyltransferase 5	GO:1901748 leukotriene D4 metabolic process;GO:1901750 leukotriene D4 biosynthetic process;GO:0006751 glutathione catabolic process		ENZYME proteins:Transferases; Predicted intracellular proteins; ENZYME proteins:Hydrolases; Enzymes	Nucleoli fibrillar center (Approved)				0.0	0.0	0.0	0.0	0.0	0.0	0.0	0.0	0.0	0.0	0.0	0.0	0.0	0.0	0.0	0.0	0.0	0.0	0.0	0.0
GJC1	10052	symbol	H. sapiens	10052	H. sapiens	GJC1	gap junction protein gamma 1	GO:0086021 SA node cell to atrial cardiac muscle cell communication by electrical coupling;GO:0086053 AV node cell to bundle of His cell communication by electrical coupling;GO:0086070 SA node cell to atrial cardiac muscle cell communication		Transporters:Transporter channels and pores; Predicted intracellular proteins	Nucleoli (Uncertain); Additional: Cell Junctions;Cytosol				0.0	0.0	0.0	0.0	0.0	0.0	0.0	0.0	1.0	0.0	0.0	0.0	0.0	1.0	0.0	0.0	0.0	0.0	0.0	0.0
GLCCI1	113263	symbol	H. sapiens	113263	H. sapiens	GLCCI1	glucocorticoid induced 1			Predicted intracellular proteins	Nucleoli (Approved)				0.0	0.0	0.0	0.0	0.0	0.0	0.0	0.0	0.0	0.0	0.0	0.0	0.0	0.0	0.0	0.0	0.0	0.0	0.0	0.0
GLI2	2736	symbol	H. sapiens	2736	H. sapiens	GLI2	GLI family zinc finger 2	GO:0021508 floor plate formation;GO:0060032 notochord regression;GO:0033505 floor plate morphogenesis		Transcription factors:Zinc-coordinating DNA-binding domains; Disease related genes; Predicted intracellular proteins	Nucleoli;Nucleoplasm (Supported)		(M211)PID HEDGEHOG 2PATHWAY; (M219)PID HEDGEHOG GLI PATHWAY		1.0	0.0	0.0	1.0	1.0	1.0	1.0	0.0	1.0	1.0	1.0	1.0	0.0	0.0	1.0	1.0	0.0	1.0	1.0	1.0
GLIS1	148979	symbol	H. sapiens	148979	H. sapiens	GLIS1	GLIS family zinc finger 1	GO:0000122 negative regulation of transcription by RNA polymerase II;GO:0045944 positive regulation of transcription by RNA polymerase II;GO:0045892 negative regulation of transcription, DNA-templated		Transcription factors:Zinc-coordinating DNA-binding domains; Predicted intracellular proteins					0.0	0.0	0.0	0.0	0.0	0.0	0.0	0.0	0.0	0.0	0.0	0.0	0.0	0.0	0.0	0.0	0.0	0.0	0.0	0.0
GLRX2	51022	symbol	H. sapiens	51022	H. sapiens	GLRX2	glutaredoxin 2	GO:0042262 DNA protection;GO:0051775 response to redox state;GO:0071450 cellular response to oxygen radical		Predicted intracellular proteins	Nucleoplasm (Supported); Additional: Vesicles	Glutathione		(M5938)HALLMARK REACTIVE OXYGEN SPECIES PATHWAY	0.0	0.0	0.0	0.0	0.0	0.0	0.0	0.0	0.0	0.0	0.0	0.0	0.0	0.0	0.0	0.0	0.0	0.0	0.0	0.0
GLRX5	51218	symbol	H. sapiens	51218	H. sapiens	GLRX5	glutaredoxin 5	GO:0106034 protein maturation by [2Fe-2S] cluster transfer;GO:0044571 [2Fe-2S] cluster assembly;GO:0106035 protein maturation by [4Fe-4S] cluster transfer		Predicted intracellular proteins; Disease related genes	Mitochondria (Supported)			(M5945)HALLMARK HEME METABOLISM	0.0	0.0	0.0	0.0	0.0	0.0	0.0	0.0	0.0	0.0	0.0	0.0	0.0	0.0	0.0	0.0	0.0	0.0	0.0	0.0
GOLGA2P7	388152	symbol	H. sapiens	388152	H. sapiens	GOLGA2P7	GOLGA2 pseudogene 7								0.0	0.0	0.0	0.0	0.0	0.0	0.0	0.0	0.0	0.0	0.0	0.0	0.0	0.0	0.0	0.0	0.0	0.0	0.0	0.0
GOLGA3	2802	symbol	H. sapiens	2802	H. sapiens	GOLGA3	golgin A3	GO:0007283 spermatogenesis;GO:0048232 male gamete generation;GO:0007276 gamete generation		Predicted intracellular proteins	Golgi apparatus (Supported); Additional: Nucleoplasm				1.0	0.0	0.0	0.0	0.0	0.0	0.0	0.0	0.0	0.0	0.0	0.0	0.0	0.0	0.0	0.0	0.0	0.0	0.0	0.0
GPC1	2817	symbol	H. sapiens	2817	H. sapiens	GPC1	glypican 1	GO:0030200 heparan sulfate proteoglycan catabolic process;GO:0030167 proteoglycan catabolic process;GO:2001016 positive regulation of skeletal muscle cell differentiation		Predicted intracellular proteins; Disease related genes	Cytosol;Plasma membrane (Supported)		(M33)PID GLYPICAN 1PATHWAY; (M5880)NABA ECM AFFILIATED; (M5885)NABA MATRISOME ASSOCIATED	(M5891)HALLMARK HYPOXIA; (M5930)HALLMARK EPITHELIAL MESENCHYMAL TRANSITION; (M5937)HALLMARK GLYCOLYSIS	0.0	0.0	1.0	0.0	0.0	0.0	0.0	1.0	1.0	0.0	1.0	0.0	0.0	0.0	0.0	0.0	1.0	0.0	0.0	0.0
GPC2	221914	symbol	H. sapiens	221914	H. sapiens	GPC2	glypican 2	GO:0007224 smoothened signaling pathway;GO:0010976 positive regulation of neuron projection development;GO:1905475 regulation of protein localization to membrane		Predicted intracellular proteins			(M5880)NABA ECM AFFILIATED; (M5885)NABA MATRISOME ASSOCIATED; (M5889)NABA MATRISOME		0.0	0.0	0.0	0.0	0.0	0.0	0.0	0.0	0.0	0.0	1.0	0.0	0.0	0.0	0.0	0.0	0.0	0.0	0.0	0.0
GPR135	64582	symbol	H. sapiens	64582	H. sapiens	GPR135	G protein-coupled receptor 135	GO:0007186 G protein-coupled receptor signaling pathway;GO:0007165 signal transduction;GO:0023052 signaling		G-protein coupled receptors:GPCRs excl olfactory receptors					0.0	0.0	0.0	0.0	0.0	0.0	0.0	0.0	0.0	0.0	0.0	0.0	0.0	0.0	0.0	0.0	0.0	0.0	0.0	0.0
GPR162	27239	symbol	H. sapiens	27239	H. sapiens	GPR162	G protein-coupled receptor 162	GO:0007186 G protein-coupled receptor signaling pathway;GO:0007165 signal transduction;GO:0023052 signaling		Predicted intracellular proteins; G-protein coupled receptors:GPCRs excl olfactory receptors	Centriolar satellite (Approved)				0.0	0.0	0.0	0.0	0.0	0.0	0.0	0.0	0.0	0.0	0.0	0.0	0.0	0.0	0.0	0.0	0.0	0.0	0.0	0.0
GPR183	1880	symbol	H. sapiens	1880	H. sapiens	GPR183	G protein-coupled receptor 183	GO:0036145 dendritic cell homeostasis;GO:0035700 astrocyte chemotaxis;GO:2000458 regulation of astrocyte chemotaxis		G-protein coupled receptors:GPCRs excl olfactory receptors	Nuclear membrane;Vesicles (Approved)			(M5890)HALLMARK TNFA SIGNALING VIA NFKB; (M5932)HALLMARK INFLAMMATORY RESPONSE	1.0	0.0	0.0	0.0	0.0	0.0	0.0	0.0	0.0	0.0	1.0	0.0	0.0	0.0	0.0	0.0	0.0	0.0	0.0	0.0
GPR63	81491	symbol	H. sapiens	81491	H. sapiens	GPR63	G protein-coupled receptor 63	GO:0007186 G protein-coupled receptor signaling pathway;GO:0007165 signal transduction;GO:0023052 signaling		G-protein coupled receptors:GPCRs excl olfactory receptors	Cytosol;Nucleoplasm;Plasma membrane (Approved)				0.0	0.0	0.0	0.0	0.0	0.0	0.0	0.0	0.0	0.0	0.0	0.0	0.0	0.0	0.0	0.0	0.0	0.0	0.0	0.0
GPRC5A	9052	symbol	H. sapiens	9052	H. sapiens	GPRC5A	G protein-coupled receptor class C group 5 member A	GO:0007175 negative regulation of epidermal growth factor-activated receptor activity;GO:0042059 negative regulation of epidermal growth factor receptor signaling pathway;GO:0007176 regulation of epidermal growth factor-activated receptor activity		Predicted intracellular proteins; G-protein coupled receptors:Family 3 (C) receptors; G-protein coupled receptors:GPCRs excl olfactory receptors	Plasma membrane;Vesicles (Enhanced)	Tretinoin			0.0	0.0	0.0	0.0	0.0	0.0	0.0	0.0	0.0	0.0	0.0	0.0	0.0	0.0	0.0	0.0	1.0	0.0	0.0	0.0
GRHPR	9380	symbol	H. sapiens	9380	H. sapiens	GRHPR	glyoxylate and hydroxypyruvate reductase	GO:0046487 glyoxylate metabolic process;GO:0006081 cellular aldehyde metabolic process;GO:0007588 excretion		Predicted intracellular proteins; Enzymes; ENZYME proteins:Oxidoreductases; Disease related genes; Potential drug targets	Cytosol (Approved); Additional: Nucleoplasm			(M5935)HALLMARK FATTY ACID METABOLISM; (M5891)HALLMARK HYPOXIA	0.0	0.0	0.0	0.0	0.0	0.0	0.0	1.0	0.0	0.0	0.0	0.0	0.0	0.0	0.0	0.0	0.0	0.0	0.0	0.0
GSTP1	2950	symbol	H. sapiens	2950	H. sapiens	GSTP1	glutathione S-transferase pi 1	GO:0035732 nitric oxide storage;GO:0071460 cellular response to cell-matrix adhesion;GO:0033484 nitric oxide homeostasis		Cancer-related genes:Candidate cancer biomarkers; Predicted intracellular proteins; ENZYME proteins:Transferases; Enzymes	Cytosol;Mitochondria (Supported)	Glutathione; Troglitazone; Clozapine; Etacrynic acid; Clomipramine; (9R,10R)-9-(S-glutathionyl)-10-hydroxy-9,10-dihydrophenanthrene; S-Hydroxycysteine; Cibacron Blue; Glutathione sulfonic acid; Deoxycholic acid; S-(4-nitrobenzyl)glutathione; 2-(N-morpholino)ethanesulfonic acid; S-Hexylglutathione; Carbocisteine; Canfosfamide; Ezatiostat; Exisulind; S-NONYL-CYSTEINE; S-(4-BROMOBENZYL)CYSTEINE; Cur…			1.0	0.0	0.0	0.0	0.0	1.0	0.0	0.0	0.0	0.0	1.0	0.0	0.0	0.0	0.0	0.0	0.0	0.0	0.0	1.0
GTF3C1	2975	symbol	H. sapiens	2975	H. sapiens	GTF3C1	general transcription factor IIIC subunit 1	GO:0042791 5S class rRNA transcription by RNA polymerase III;GO:0042797 tRNA transcription by RNA polymerase III;GO:0006384 transcription initiation from RNA polymerase III promoter		Predicted intracellular proteins	Nucleoli;Nucleoplasm (Approved)				1.0	0.0	0.0	0.0	0.0	0.0	0.0	0.0	0.0	0.0	0.0	0.0	0.0	0.0	0.0	0.0	0.0	0.0	0.0	0.0
H2AFY2	55506	gene_synonym	H. sapiens	55506	H. sapiens	MACROH2A2	macroH2A.2 histone	GO:1901837 negative regulation of transcription of nucleolar large rRNA by RNA polymerase I;GO:0016479 negative regulation of transcription by RNA polymerase I;GO:0071169 establishment of protein localization to chromatin		Predicted intracellular proteins	Nucleoplasm (Supported)			(M5956)HALLMARK KRAS SIGNALING DN	1.0	1.0	1.0	0.0	0.0	0.0	0.0	0.0	0.0	1.0	0.0	0.0	0.0	0.0	0.0	1.0	0.0	0.0	0.0	0.0
H3F3B	3021	gene_synonym	H. sapiens	3021	H. sapiens	H3-3B	H3.3 histone B	GO:0006336 DNA replication-independent nucleosome assembly;GO:0034724 DNA replication-independent nucleosome organization;GO:0006334 nucleosome assembly		Predicted intracellular proteins; Disease related genes; Cancer-related genes	Nucleoplasm (Enhanced)				1.0	0.0	1.0	0.0	0.0	0.0	0.0	0.0	0.0	0.0	0.0	0.0	0.0	0.0	0.0	0.0	0.0	0.0	0.0	0.0
HAAO	23498	symbol	H. sapiens	23498	H. sapiens	HAAO	3-hydroxyanthranilate 3,4-dioxygenase	GO:0043420 anthranilate metabolic process;GO:0019805 quinolinate biosynthetic process;GO:0046874 quinolinate metabolic process		Predicted intracellular proteins; Enzymes; ENZYME proteins:Oxidoreductases; Disease related genes; Potential drug targets					0.0	0.0	0.0	0.0	0.0	0.0	0.0	1.0	0.0	0.0	0.0	0.0	0.0	0.0	0.0	0.0	0.0	0.0	0.0	0.0
HAP1	9001	symbol	H. sapiens	9001	H. sapiens	HAP1	huntingtin associated protein 1	GO:0032901 positive regulation of neurotrophin production;GO:0032899 regulation of neurotrophin production;GO:0032898 neurotrophin production		Predicted intracellular proteins	Cytosol (Supported); Additional: Nucleoli				0.0	0.0	0.0	0.0	0.0	0.0	0.0	0.0	0.0	1.0	1.0	0.0	0.0	0.0	0.0	0.0	1.0	0.0	0.0	0.0
HAS2-AS1	594842	symbol	H. sapiens	594842	H. sapiens	HAS2-AS1	HAS2 antisense RNA 1								0.0	0.0	0.0	0.0	0.0	0.0	0.0	0.0	0.0	0.0	0.0	0.0	0.0	0.0	0.0	0.0	0.0	0.0	0.0	0.0
HAS3	3038	symbol	H. sapiens	3038	H. sapiens	HAS3	hyaluronan synthase 3	GO:0036118 hyaluranon cable assembly;GO:1900104 regulation of hyaluranon cable assembly;GO:1900106 positive regulation of hyaluranon cable assembly		ENZYME proteins:Transferases; Enzymes	Microtubules (Approved)				0.0	0.0	0.0	0.0	0.0	0.0	0.0	0.0	0.0	0.0	0.0	0.0	0.0	0.0	0.0	0.0	0.0	0.0	0.0	0.0
HBEGF	1839	symbol	H. sapiens	1839	H. sapiens	HBEGF	heparin binding EGF like growth factor	GO:0051543 regulation of elastin biosynthetic process;GO:0051545 negative regulation of elastin biosynthetic process;GO:0051542 elastin biosynthetic process		Predicted secreted proteins			(M201)PID ERBB NETWORK PATHWAY; (M13)PID ERBB4 PATHWAY; (M41)PID ER NONGENOMIC PATHWAY	(M5890)HALLMARK TNFA SIGNALING VIA NFKB; (M5909)HALLMARK MYOGENESIS; (M5932)HALLMARK INFLAMMATORY RESPONSE	1.0	0.0	0.0	0.0	1.0	0.0	0.0	0.0	1.0	0.0	1.0	0.0	0.0	1.0	0.0	0.0	1.0	0.0	1.0	1.0
HCN2	610	symbol	H. sapiens	610	H. sapiens	HCN2	hyperpolarization activated cyclic nucleotide gated potassium and sodium channel 2	GO:0071321 cellular response to cGMP;GO:0070305 response to cGMP;GO:0098719 sodium ion import across plasma membrane		Transporters:Transporter channels and pores; Voltage-gated ion channels:Cyclic Nucleotide-Regulated Channels		Cyclic GMP; Cyclic adenosine monophosphate; Ivabradine			0.0	0.0	0.0	0.0	0.0	0.0	0.0	0.0	0.0	0.0	0.0	0.0	0.0	0.0	0.0	0.0	0.0	0.0	0.0	0.0
HDAC4	9759	symbol	H. sapiens	9759	H. sapiens	HDAC4	histone deacetylase 4	GO:1902435 regulation of male mating behavior;GO:1902437 positive regulation of male mating behavior;GO:0014870 response to muscle inactivity		Predicted intracellular proteins; FDA approved drug targets:Small molecule drugs; ENZYME proteins:Hydrolases; Enzymes; Disease related genes	Nuclear speckles (Supported); Additional: Cytosol;Nucleoplasm	Zinc; Romidepsin; N-hydroxy-5-[(3-phenyl-5,6-dihydroimidazo[1,2-a]pyrazin-7(8H)-yl)carbonyl]thiophene-2-carboxamide; 2,2,2-TRIFLUORO-1-{5-[(3-PHENYL-5,6-DIHYDROIMIDAZO[1,2-A]PYRAZIN-7(8H)-YL)CARBONYL]THIOPHEN-2-YL}ETHANE-1,1-DIOL; Zinc acetate; Zinc chloride; Zinc sulfate, unspecified form	(M140)PID RANBP2 PATHWAY; (M32)PID HDAC CLASSIII PATHWAY; (M30)PID HDAC CLASSII PATHWAY		1.0	1.0	0.0	1.0	0.0	0.0	0.0	0.0	1.0	0.0	1.0	1.0	1.0	1.0	1.0	0.0	0.0	0.0	0.0	1.0
HDGFRP3	50810	gene_synonym	H. sapiens	50810	H. sapiens	HDGFL3	HDGF like 3	GO:0007026 negative regulation of microtubule depolymerization;GO:0031114 regulation of microtubule depolymerization;GO:0031111 negative regulation of microtubule polymerization or depolymerization		Predicted intracellular proteins	Nucleoplasm (Supported)				0.0	0.0	0.0	0.0	0.0	0.0	0.0	0.0	0.0	0.0	0.0	0.0	0.0	0.0	0.0	0.0	0.0	0.0	0.0	0.0
HES4	57801	symbol	H. sapiens	57801	H. sapiens	HES4	hes family bHLH transcription factor 4	GO:0009952 anterior/posterior pattern specification;GO:0003002 regionalization;GO:0007389 pattern specification process		Predicted intracellular proteins; Transcription factors:Basic domains	Nucleoplasm (Approved); Additional: Cytosol;Vesicles				0.0	0.0	0.0	0.0	0.0	0.0	0.0	0.0	0.0	0.0	0.0	0.0	0.0	0.0	0.0	0.0	0.0	0.0	0.0	0.0
HES5	388585	symbol	H. sapiens	388585	H. sapiens	HES5	hes family bHLH transcription factor 5	GO:2000978 negative regulation of forebrain neuron differentiation;GO:1905457 negative regulation of lymphoid progenitor cell differentiation;GO:2000974 negative regulation of pro-B cell differentiation		Predicted intracellular proteins; Transcription factors:Basic domains	Nucleoplasm (Approved); Additional: Cytosol;Nuclear speckles		(M81)PID CDC42 PATHWAY		1.0	0.0	0.0	1.0	1.0	0.0	1.0	0.0	0.0	1.0	1.0	1.0	1.0	0.0	0.0	0.0	0.0	1.0	1.0	1.0
HES6	55502	symbol	H. sapiens	55502	H. sapiens	HES6	hes family bHLH transcription factor 6	GO:0043433 negative regulation of DNA-binding transcription factor activity;GO:0009952 anterior/posterior pattern specification;GO:0003002 regionalization		Predicted intracellular proteins; Transcription factors:Basic domains	Nuclear bodies (Approved); Additional: Cytosol		(M288)PID HES HEY PATHWAY	(M5934)HALLMARK XENOBIOTIC METABOLISM	0.0	0.0	0.0	0.0	0.0	0.0	0.0	0.0	0.0	0.0	1.0	0.0	0.0	0.0	0.0	0.0	0.0	0.0	1.0	0.0
HGH1	51236	symbol	H. sapiens	51236	H. sapiens	HGH1	HGH1 homolog	GO:0008150 biological_process		Predicted intracellular proteins	Cytosol;Nuclear bodies (Supported); Additional: Nucleoplasm				0.0	0.0	0.0	0.0	0.0	0.0	0.0	0.0	0.0	0.0	0.0	0.0	0.0	0.0	0.0	0.0	0.0	0.0	0.0	0.0
HHEX	3087	symbol	H. sapiens	3087	H. sapiens	HHEX	hematopoietically expressed homeobox	GO:0010621 negative regulation of transcription by transcription factor localization;GO:0010944 negative regulation of transcription by competitive promoter binding;GO:0030948 negative regulation of vascular endothelial growth factor receptor signaling pathway		Predicted intracellular proteins; Transcription factors:Helix-turn-helix domains	Mitochondria;Nucleoplasm (Approved)			(M5938)HALLMARK REACTIVE OXYGEN SPECIES PATHWAY	1.0	0.0	1.0	0.0	0.0	0.0	0.0	0.0	0.0	0.0	0.0	0.0	0.0	1.0	0.0	0.0	1.0	0.0	0.0	0.0
HIC1	3090	symbol	H. sapiens	3090	H. sapiens	HIC1	HIC ZBTB transcriptional repressor 1	GO:0043517 positive regulation of DNA damage response, signal transduction by p53 class mediator;GO:1901798 positive regulation of signal transduction by p53 class mediator;GO:0043516 regulation of DNA damage response, signal transduction by p53 class mediator		Transcription factors:Zinc-coordinating DNA-binding domains; Predicted intracellular proteins			(M40)PID E2F PATHWAY; (M145)PID P53 DOWNSTREAM PATHWAY		1.0	0.0	0.0	0.0	0.0	0.0	0.0	0.0	0.0	0.0	0.0	0.0	0.0	0.0	0.0	0.0	0.0	0.0	0.0	0.0
HID1	283987	symbol	H. sapiens	283987	H. sapiens	HID1	HID1 domain containing			Predicted intracellular proteins	Cytosol;Golgi apparatus (Supported)				0.0	0.0	0.0	0.0	0.0	0.0	0.0	0.0	0.0	0.0	0.0	0.0	0.0	0.0	0.0	0.0	0.0	0.0	0.0	0.0
HIST1H1A	3024	gene_synonym	H. sapiens	3024	H. sapiens	H1-1	H1.1 linker histone, cluster member	GO:0031936 negative regulation of chromatin silencing;GO:0016584 nucleosome positioning;GO:0031935 regulation of chromatin silencing		Predicted intracellular proteins	Nucleoplasm (Supported)				1.0	1.0	1.0	0.0	0.0	0.0	0.0	0.0	0.0	0.0	0.0	0.0	0.0	0.0	0.0	0.0	0.0	0.0	0.0	1.0
HIST1H1B	3009	gene_synonym	H. sapiens	3009	H. sapiens	H1-5	H1.5 linker histone, cluster member	GO:0071169 establishment of protein localization to chromatin;GO:0051574 positive regulation of histone H3-K9 methylation;GO:0031936 negative regulation of chromatin silencing		Predicted intracellular proteins	Nucleoplasm (Supported)				1.0	1.0	1.0	0.0	0.0	0.0	0.0	0.0	0.0	0.0	0.0	0.0	0.0	0.0	0.0	0.0	0.0	0.0	0.0	1.0
HIST1H1C	3006	gene_synonym	H. sapiens	3006	H. sapiens	H1-2	H1.2 linker histone, cluster member	GO:0098532 histone H3-K27 trimethylation;GO:0031936 negative regulation of chromatin silencing;GO:0016584 nucleosome positioning		Predicted intracellular proteins	Nucleoli rim;Nucleoplasm (Supported)			(M5939)HALLMARK P53 PATHWAY	1.0	1.0	1.0	0.0	0.0	0.0	0.0	0.0	0.0	0.0	0.0	0.0	0.0	0.0	0.0	0.0	0.0	0.0	0.0	1.0
HIST1H1D	3007	gene_synonym	H. sapiens	3007	H. sapiens	H1-3	H1.3 linker histone, cluster member	GO:0031936 negative regulation of chromatin silencing;GO:0016584 nucleosome positioning;GO:0031935 regulation of chromatin silencing		Predicted intracellular proteins					1.0	1.0	1.0	0.0	0.0	0.0	0.0	1.0	0.0	0.0	0.0	0.0	0.0	0.0	0.0	0.0	0.0	0.0	0.0	1.0
HIST1H1E	3008	gene_synonym	H. sapiens	3008	H. sapiens	H1-4	H1.4 linker histone, cluster member	GO:0031936 negative regulation of chromatin silencing;GO:0016584 nucleosome positioning;GO:0031935 regulation of chromatin silencing		Cancer-related genes:Mutated cancer genes; Predicted intracellular proteins; Disease related genes	Nuclear speckles (Supported)	Copper	(M32)PID HDAC CLASSIII PATHWAY		1.0	1.0	1.0	0.0	0.0	0.0	0.0	0.0	0.0	0.0	0.0	0.0	0.0	0.0	0.0	0.0	0.0	0.0	0.0	1.0
HIST1H2AB	8335	gene_synonym	H. sapiens	8335	H. sapiens	H2AC4	H2A clustered histone 4	GO:0006342 chromatin silencing;GO:0045814 negative regulation of gene expression, epigenetic;GO:0097549 chromatin organization involved in negative regulation of transcription		Predicted intracellular proteins	Nucleoplasm (Approved)				1.0	1.0	1.0	0.0	0.0	0.0	0.0	0.0	0.0	0.0	0.0	0.0	0.0	0.0	0.0	0.0	0.0	0.0	0.0	1.0
HIST1H2AC	8334	gene_synonym	H. sapiens	8334	H. sapiens	H2AC6	H2A clustered histone 6	GO:0006342 chromatin silencing;GO:0045814 negative regulation of gene expression, epigenetic;GO:0097549 chromatin organization involved in negative regulation of transcription		Cancer-related genes:Candidate cancer biomarkers; Predicted intracellular proteins	Nucleoplasm (Approved)				1.0	1.0	1.0	0.0	0.0	0.0	0.0	0.0	0.0	0.0	0.0	0.0	0.0	0.0	0.0	0.0	0.0	0.0	0.0	0.0
HIST1H2AD	3013	gene_synonym	H. sapiens	3013	H. sapiens	H2AC7	H2A clustered histone 7	GO:0006342 chromatin silencing;GO:0045814 negative regulation of gene expression, epigenetic;GO:0097549 chromatin organization involved in negative regulation of transcription		Predicted intracellular proteins	Nucleoplasm (Approved)				1.0	1.0	1.0	0.0	0.0	0.0	0.0	0.0	0.0	0.0	0.0	0.0	0.0	0.0	0.0	0.0	0.0	0.0	0.0	0.0
HIST1H2AE	3012	gene_synonym	H. sapiens	3012	H. sapiens	H2AC8	H2A clustered histone 8	GO:0006342 chromatin silencing;GO:0045814 negative regulation of gene expression, epigenetic;GO:0097549 chromatin organization involved in negative regulation of transcription		Predicted intracellular proteins	Nucleoplasm (Supported)				1.0	1.0	1.0	0.0	0.0	0.0	0.0	0.0	0.0	0.0	0.0	0.0	0.0	0.0	0.0	0.0	0.0	0.0	0.0	0.0
HIST1H2AG	8969	gene_synonym	H. sapiens	8969	H. sapiens	H2AC11	H2A clustered histone 11	GO:0006342 chromatin silencing;GO:0045814 negative regulation of gene expression, epigenetic;GO:0097549 chromatin organization involved in negative regulation of transcription		Predicted intracellular proteins	Nucleoplasm (Approved)				1.0	1.0	1.0	0.0	0.0	0.0	0.0	0.0	0.0	0.0	0.0	0.0	0.0	0.0	0.0	0.0	0.0	0.0	0.0	0.0
HIST1H2AH	85235	gene_synonym	H. sapiens	85235	H. sapiens	H2AC12	H2A clustered histone 12	GO:0006342 chromatin silencing;GO:0045814 negative regulation of gene expression, epigenetic;GO:0097549 chromatin organization involved in negative regulation of transcription		Predicted intracellular proteins	Nucleoplasm (Approved)				1.0	1.0	1.0	0.0	0.0	0.0	0.0	0.0	0.0	0.0	0.0	0.0	0.0	0.0	0.0	0.0	0.0	0.0	0.0	0.0
HIST1H2AI	8329	gene_synonym	H. sapiens	8329	H. sapiens	H2AC13	H2A clustered histone 13	GO:0006342 chromatin silencing;GO:0045814 negative regulation of gene expression, epigenetic;GO:0097549 chromatin organization involved in negative regulation of transcription		Predicted intracellular proteins	Nucleoplasm (Approved)				1.0	1.0	1.0	0.0	0.0	0.0	0.0	0.0	0.0	0.0	0.0	0.0	0.0	0.0	0.0	0.0	0.0	0.0	0.0	0.0
HIST1H2AJ	8331	gene_synonym	H. sapiens	8331	H. sapiens	H2AC14	H2A clustered histone 14			Predicted intracellular proteins	Nucleoplasm (Approved)				1.0	1.0	0.0	0.0	0.0	0.0	0.0	0.0	0.0	0.0	0.0	0.0	0.0	0.0	0.0	0.0	0.0	0.0	0.0	0.0
HIST1H2AK	8330	gene_synonym	H. sapiens	8330	H. sapiens	H2AC15	H2A clustered histone 15	GO:0006342 chromatin silencing;GO:0045814 negative regulation of gene expression, epigenetic;GO:0097549 chromatin organization involved in negative regulation of transcription		Predicted intracellular proteins	Nucleoplasm (Approved)				1.0	1.0	1.0	0.0	0.0	0.0	0.0	0.0	0.0	0.0	0.0	0.0	0.0	0.0	0.0	0.0	0.0	0.0	0.0	0.0
HIST1H2AL	8332	gene_synonym	H. sapiens	8332	H. sapiens	H2AC16	H2A clustered histone 16	GO:0006342 chromatin silencing;GO:0045814 negative regulation of gene expression, epigenetic;GO:0097549 chromatin organization involved in negative regulation of transcription		Predicted intracellular proteins	Nucleoplasm (Approved)				1.0	1.0	1.0	0.0	0.0	0.0	0.0	0.0	0.0	0.0	0.0	0.0	0.0	0.0	0.0	0.0	0.0	0.0	0.0	0.0
HIST1H2AM	8336	gene_synonym	H. sapiens	8336	H. sapiens	H2AC17	H2A clustered histone 17	GO:0006342 chromatin silencing;GO:0045814 negative regulation of gene expression, epigenetic;GO:0097549 chromatin organization involved in negative regulation of transcription		Predicted intracellular proteins	Nucleoplasm (Approved)				1.0	1.0	1.0	0.0	0.0	0.0	0.0	0.0	0.0	0.0	0.0	0.0	0.0	0.0	0.0	0.0	0.0	0.0	0.0	0.0
HIST1H2BB	3018	gene_synonym	H. sapiens	3018	H. sapiens	H2BC3	H2B clustered histone 3	GO:0006334 nucleosome assembly;GO:0034728 nucleosome organization;GO:0031497 chromatin assembly		Predicted intracellular proteins	Nucleoplasm (Approved); Additional: Cytosol			(M5953)HALLMARK KRAS SIGNALING UP	1.0	1.0	0.0	0.0	0.0	0.0	0.0	0.0	0.0	0.0	0.0	0.0	0.0	0.0	0.0	0.0	0.0	0.0	0.0	0.0
HIST1H2BC	3017	gene_synonym	H. sapiens	3017	H. sapiens	H2BC5	H2B clustered histone 5	GO:0006334 nucleosome assembly;GO:0034728 nucleosome organization;GO:0031497 chromatin assembly		Predicted intracellular proteins	Nucleoplasm (Approved); Additional: Cytosol				1.0	1.0	0.0	0.0	0.0	0.0	0.0	0.0	0.0	0.0	0.0	0.0	0.0	0.0	0.0	0.0	0.0	0.0	0.0	0.0
HIST1H2BD	3017	gene_synonym	H. sapiens	3017	H. sapiens	H2BC5	H2B clustered histone 5	GO:0006334 nucleosome assembly;GO:0034728 nucleosome organization;GO:0031497 chromatin assembly		Predicted intracellular proteins	Nucleoplasm (Approved); Additional: Cytosol				1.0	1.0	0.0	0.0	0.0	0.0	0.0	0.0	0.0	0.0	0.0	0.0	0.0	0.0	0.0	0.0	0.0	0.0	0.0	0.0
HIST1H2BE	3017	gene_synonym	H. sapiens	3017	H. sapiens	H2BC5	H2B clustered histone 5	GO:0006334 nucleosome assembly;GO:0034728 nucleosome organization;GO:0031497 chromatin assembly		Predicted intracellular proteins	Nucleoplasm (Approved); Additional: Cytosol				1.0	1.0	0.0	0.0	0.0	0.0	0.0	0.0	0.0	0.0	0.0	0.0	0.0	0.0	0.0	0.0	0.0	0.0	0.0	0.0
HIST1H2BF	3017	gene_synonym	H. sapiens	3017	H. sapiens	H2BC5	H2B clustered histone 5	GO:0006334 nucleosome assembly;GO:0034728 nucleosome organization;GO:0031497 chromatin assembly		Predicted intracellular proteins	Nucleoplasm (Approved); Additional: Cytosol				1.0	1.0	0.0	0.0	0.0	0.0	0.0	0.0	0.0	0.0	0.0	0.0	0.0	0.0	0.0	0.0	0.0	0.0	0.0	0.0
HIST1H2BG	3017	gene_synonym	H. sapiens	3017	H. sapiens	H2BC5	H2B clustered histone 5	GO:0006334 nucleosome assembly;GO:0034728 nucleosome organization;GO:0031497 chromatin assembly		Predicted intracellular proteins	Nucleoplasm (Approved); Additional: Cytosol				1.0	1.0	0.0	0.0	0.0	0.0	0.0	0.0	0.0	0.0	0.0	0.0	0.0	0.0	0.0	0.0	0.0	0.0	0.0	0.0
HIST1H2BH	8345	gene_synonym	H. sapiens	8345	H. sapiens	H2BC9	H2B clustered histone 9	GO:0006334 nucleosome assembly;GO:0034728 nucleosome organization;GO:0031497 chromatin assembly		Predicted intracellular proteins	Nucleoplasm (Approved); Additional: Cytosol				1.0	1.0	0.0	0.0	0.0	0.0	0.0	0.0	0.0	0.0	0.0	0.0	0.0	0.0	0.0	0.0	0.0	0.0	0.0	0.0
HIST1H2BI	3017	gene_synonym	H. sapiens	3017	H. sapiens	H2BC5	H2B clustered histone 5	GO:0006334 nucleosome assembly;GO:0034728 nucleosome organization;GO:0031497 chromatin assembly		Predicted intracellular proteins	Nucleoplasm (Approved); Additional: Cytosol				1.0	1.0	0.0	0.0	0.0	0.0	0.0	0.0	0.0	0.0	0.0	0.0	0.0	0.0	0.0	0.0	0.0	0.0	0.0	0.0
HIST1H2BJ	8970	gene_synonym	H. sapiens	8970	H. sapiens	H2BC11	H2B clustered histone 11	GO:0010804 negative regulation of tumor necrosis factor-mediated signaling pathway;GO:0002227 innate immune response in mucosa;GO:0002385 mucosal immune response		Predicted intracellular proteins	Nucleoplasm (Approved); Additional: Cytosol				1.0	1.0	0.0	0.0	0.0	0.0	0.0	0.0	0.0	0.0	0.0	0.0	0.0	0.0	0.0	0.0	0.0	0.0	0.0	0.0
HIST1H2BL	8340	gene_synonym	H. sapiens	8340	H. sapiens	H2BC13	H2B clustered histone 13	GO:0006334 nucleosome assembly;GO:0034728 nucleosome organization;GO:0031497 chromatin assembly		Predicted intracellular proteins	Nucleoplasm (Approved); Additional: Cytosol				1.0	1.0	0.0	0.0	0.0	0.0	0.0	0.0	0.0	0.0	0.0	0.0	0.0	0.0	0.0	0.0	0.0	0.0	0.0	0.0
HIST1H2BM	8342	gene_synonym	H. sapiens	8342	H. sapiens	H2BC14	H2B clustered histone 14	GO:0006334 nucleosome assembly;GO:0034728 nucleosome organization;GO:0031497 chromatin assembly		Predicted intracellular proteins	Nucleoplasm (Approved); Additional: Cytosol				1.0	1.0	0.0	0.0	0.0	0.0	0.0	1.0	0.0	0.0	0.0	0.0	0.0	0.0	0.0	0.0	0.0	0.0	0.0	0.0
HIST1H2BN	8341	gene_synonym	H. sapiens	8341	H. sapiens	H2BC15	H2B clustered histone 15	GO:0006334 nucleosome assembly;GO:0034728 nucleosome organization;GO:0031497 chromatin assembly		Predicted intracellular proteins	Nucleoplasm (Approved); Additional: Cytosol				1.0	1.0	0.0	0.0	0.0	0.0	0.0	0.0	0.0	0.0	0.0	0.0	0.0	0.0	0.0	0.0	0.0	0.0	0.0	0.0
HIST1H2BO	8348	gene_synonym	H. sapiens	8348	H. sapiens	H2BC17	H2B clustered histone 17	GO:0006334 nucleosome assembly;GO:0034728 nucleosome organization;GO:0031497 chromatin assembly		Predicted intracellular proteins	Nucleoplasm (Approved); Additional: Cytosol				1.0	1.0	0.0	0.0	0.0	0.0	0.0	0.0	0.0	0.0	0.0	0.0	0.0	0.0	0.0	0.0	0.0	0.0	0.0	0.0
HIST1H3A	8350	gene_synonym	H. sapiens	8350	H. sapiens	H3C1	H3 clustered histone 1	GO:0006335 DNA replication-dependent nucleosome assembly;GO:0034723 DNA replication-dependent nucleosome organization;GO:0060968 regulation of gene silencing		Predicted intracellular proteins; Disease related genes					1.0	0.0	1.0	0.0	0.0	0.0	0.0	0.0	0.0	0.0	0.0	0.0	0.0	0.0	0.0	0.0	0.0	0.0	0.0	0.0
HIST1H3B	8358	gene_synonym	H. sapiens	8358	H. sapiens	H3C2	H3 clustered histone 2	GO:0006335 DNA replication-dependent nucleosome assembly;GO:0034723 DNA replication-dependent nucleosome organization;GO:0060968 regulation of gene silencing							1.0	0.0	1.0	0.0	0.0	0.0	0.0	0.0	0.0	0.0	0.0	0.0	0.0	0.0	0.0	0.0	0.0	0.0	0.0	0.0
HIST1H3C	8352	gene_synonym	H. sapiens	8352	H. sapiens	H3C3	H3 clustered histone 3	GO:0006335 DNA replication-dependent nucleosome assembly;GO:0034723 DNA replication-dependent nucleosome organization;GO:0060968 regulation of gene silencing							1.0	0.0	1.0	0.0	0.0	0.0	0.0	0.0	0.0	0.0	0.0	0.0	0.0	0.0	0.0	0.0	0.0	0.0	0.0	0.0
HIST1H3D	8351	gene_synonym	H. sapiens	8351	H. sapiens	H3C4	H3 clustered histone 4	GO:0006335 DNA replication-dependent nucleosome assembly;GO:0034723 DNA replication-dependent nucleosome organization;GO:0060968 regulation of gene silencing		Predicted intracellular proteins; Disease related genes					1.0	0.0	1.0	0.0	0.0	0.0	0.0	0.0	0.0	0.0	0.0	0.0	0.0	0.0	0.0	0.0	0.0	0.0	0.0	0.0
HIST1H3E	8353	gene_synonym	H. sapiens	8353	H. sapiens	H3C6	H3 clustered histone 6	GO:0006335 DNA replication-dependent nucleosome assembly;GO:0034723 DNA replication-dependent nucleosome organization;GO:0060968 regulation of gene silencing		Predicted intracellular proteins; Disease related genes					1.0	0.0	1.0	0.0	0.0	0.0	0.0	0.0	0.0	0.0	0.0	0.0	0.0	0.0	0.0	0.0	0.0	0.0	0.0	0.0
HIST1H3F	8968	gene_synonym	H. sapiens	8968	H. sapiens	H3C7	H3 clustered histone 7	GO:0006335 DNA replication-dependent nucleosome assembly;GO:0034723 DNA replication-dependent nucleosome organization;GO:0060968 regulation of gene silencing		Predicted intracellular proteins; Disease related genes					1.0	0.0	1.0	0.0	0.0	0.0	0.0	0.0	0.0	0.0	0.0	0.0	0.0	0.0	0.0	0.0	0.0	0.0	0.0	0.0
HIST1H3G	8355	gene_synonym	H. sapiens	8355	H. sapiens	H3C8	H3 clustered histone 8	GO:0006335 DNA replication-dependent nucleosome assembly;GO:0034723 DNA replication-dependent nucleosome organization;GO:0060968 regulation of gene silencing		Predicted intracellular proteins; Disease related genes					1.0	0.0	1.0	0.0	0.0	0.0	0.0	0.0	0.0	0.0	0.0	0.0	0.0	0.0	0.0	0.0	0.0	0.0	0.0	0.0
HIST1H3H	8357	gene_synonym	H. sapiens	8357	H. sapiens	H3C10	H3 clustered histone 10	GO:0006335 DNA replication-dependent nucleosome assembly;GO:0034723 DNA replication-dependent nucleosome organization;GO:0060968 regulation of gene silencing		Predicted intracellular proteins; Disease related genes					1.0	0.0	1.0	0.0	0.0	0.0	0.0	0.0	0.0	0.0	0.0	0.0	0.0	0.0	0.0	0.0	0.0	0.0	0.0	0.0
HIST1H3I	8354	gene_synonym	H. sapiens	8354	H. sapiens	H3C11	H3 clustered histone 11	GO:0006335 DNA replication-dependent nucleosome assembly;GO:0034723 DNA replication-dependent nucleosome organization;GO:0060968 regulation of gene silencing		Predicted intracellular proteins; Disease related genes					1.0	0.0	1.0	0.0	0.0	0.0	0.0	0.0	0.0	0.0	0.0	0.0	0.0	0.0	0.0	0.0	0.0	0.0	0.0	0.0
HIST1H3J	8356	gene_synonym	H. sapiens	8356	H. sapiens	H3C12	H3 clustered histone 12	GO:0006335 DNA replication-dependent nucleosome assembly;GO:0034723 DNA replication-dependent nucleosome organization;GO:0060968 regulation of gene silencing		Predicted intracellular proteins; Disease related genes					1.0	0.0	1.0	0.0	0.0	0.0	0.0	0.0	0.0	0.0	0.0	0.0	0.0	0.0	0.0	0.0	0.0	0.0	0.0	0.0
HIST1H4A	8359	gene_synonym	H. sapiens	8359	H. sapiens	H4C1	H4 clustered histone 1	GO:0045653 negative regulation of megakaryocyte differentiation;GO:0006335 DNA replication-dependent nucleosome assembly;GO:0034723 DNA replication-dependent nucleosome organization		Predicted intracellular proteins; Disease related genes					1.0	0.0	0.0	1.0	0.0	0.0	0.0	0.0	0.0	0.0	0.0	0.0	0.0	0.0	0.0	0.0	0.0	0.0	0.0	0.0
HIST1H4B	8366	gene_synonym	H. sapiens	8366	H. sapiens	H4C2	H4 clustered histone 2	GO:0045653 negative regulation of megakaryocyte differentiation;GO:0006335 DNA replication-dependent nucleosome assembly;GO:0034723 DNA replication-dependent nucleosome organization		Predicted intracellular proteins; Disease related genes					1.0	0.0	0.0	1.0	0.0	0.0	0.0	0.0	0.0	0.0	0.0	0.0	0.0	0.0	0.0	0.0	0.0	0.0	0.0	0.0
HIST1H4C	8364	gene_synonym	H. sapiens	8364	H. sapiens	H4C3	H4 clustered histone 3	GO:0045653 negative regulation of megakaryocyte differentiation;GO:0006335 DNA replication-dependent nucleosome assembly;GO:0034723 DNA replication-dependent nucleosome organization		Predicted intracellular proteins; Disease related genes				(M5945)HALLMARK HEME METABOLISM	1.0	0.0	0.0	1.0	0.0	0.0	0.0	0.0	0.0	0.0	0.0	0.0	0.0	0.0	0.0	0.0	0.0	0.0	0.0	0.0
HIST1H4D	8360	gene_synonym	H. sapiens	8360	H. sapiens	H4C4	H4 clustered histone 4	GO:0045653 negative regulation of megakaryocyte differentiation;GO:0006335 DNA replication-dependent nucleosome assembly;GO:0034723 DNA replication-dependent nucleosome organization		Predicted intracellular proteins; Disease related genes					1.0	0.0	0.0	1.0	0.0	0.0	0.0	0.0	0.0	0.0	0.0	0.0	0.0	0.0	0.0	0.0	0.0	0.0	0.0	0.0
HIST1H4E	8367	gene_synonym	H. sapiens	8367	H. sapiens	H4C5	H4 clustered histone 5	GO:0045653 negative regulation of megakaryocyte differentiation;GO:0006335 DNA replication-dependent nucleosome assembly;GO:0034723 DNA replication-dependent nucleosome organization		Cancer-related genes:Mutated cancer genes; Predicted intracellular proteins; Disease related genes					1.0	0.0	0.0	1.0	0.0	0.0	0.0	0.0	0.0	0.0	0.0	0.0	0.0	0.0	0.0	0.0	0.0	0.0	0.0	0.0
HIST1H4F	8361	gene_synonym	H. sapiens	8361	H. sapiens	H4C6	H4 clustered histone 6	GO:0045653 negative regulation of megakaryocyte differentiation;GO:0006335 DNA replication-dependent nucleosome assembly;GO:0034723 DNA replication-dependent nucleosome organization		Predicted intracellular proteins; Disease related genes					1.0	0.0	0.0	1.0	0.0	0.0	0.0	0.0	0.0	0.0	0.0	0.0	0.0	0.0	0.0	0.0	0.0	0.0	0.0	0.0
HIST1H4H	8365	gene_synonym	H. sapiens	8365	H. sapiens	H4C8	H4 clustered histone 8	GO:0045653 negative regulation of megakaryocyte differentiation;GO:0006335 DNA replication-dependent nucleosome assembly;GO:0034723 DNA replication-dependent nucleosome organization		Predicted intracellular proteins; Disease related genes					1.0	0.0	0.0	1.0	0.0	0.0	0.0	0.0	0.0	0.0	0.0	0.0	0.0	0.0	0.0	0.0	0.0	0.0	0.0	0.0
HIST1H4I	8294	gene_synonym	H. sapiens	8294	H. sapiens	H4C9	H4 clustered histone 9	GO:0045653 negative regulation of megakaryocyte differentiation;GO:0006335 DNA replication-dependent nucleosome assembly;GO:0034723 DNA replication-dependent nucleosome organization		Predicted intracellular proteins; Disease related genes; Cancer-related genes			(M32)PID HDAC CLASSIII PATHWAY		1.0	0.0	0.0	1.0	0.0	0.0	0.0	0.0	0.0	0.0	0.0	0.0	0.0	0.0	0.0	0.0	0.0	0.0	0.0	0.0
HIST1H4J	8363	gene_synonym	H. sapiens	8363	H. sapiens	H4C11	H4 clustered histone 11	GO:0045653 negative regulation of megakaryocyte differentiation;GO:0006335 DNA replication-dependent nucleosome assembly;GO:0034723 DNA replication-dependent nucleosome organization		Predicted intracellular proteins; Disease related genes					1.0	0.0	0.0	1.0	0.0	0.0	0.0	0.0	0.0	0.0	0.0	0.0	0.0	0.0	0.0	0.0	0.0	0.0	0.0	0.0
HIST1H4K	8362	gene_synonym	H. sapiens	8362	H. sapiens	H4C12	H4 clustered histone 12	GO:0045653 negative regulation of megakaryocyte differentiation;GO:0006335 DNA replication-dependent nucleosome assembly;GO:0034723 DNA replication-dependent nucleosome organization		Predicted intracellular proteins; Disease related genes					1.0	0.0	0.0	1.0	0.0	0.0	0.0	0.0	0.0	0.0	0.0	0.0	0.0	0.0	0.0	0.0	0.0	0.0	0.0	0.0
HIST1H4L	8368	gene_synonym	H. sapiens	8368	H. sapiens	H4C13	H4 clustered histone 13	GO:0045653 negative regulation of megakaryocyte differentiation;GO:0006335 DNA replication-dependent nucleosome assembly;GO:0034723 DNA replication-dependent nucleosome organization		Predicted intracellular proteins; Disease related genes					1.0	0.0	0.0	1.0	0.0	0.0	0.0	0.0	0.0	0.0	0.0	0.0	0.0	0.0	0.0	0.0	0.0	0.0	0.0	0.0
HIST2H2AB	317772	gene_synonym	H. sapiens	317772	H. sapiens	H2AC21	H2A clustered histone 21	GO:0006342 chromatin silencing;GO:0045814 negative regulation of gene expression, epigenetic;GO:0097549 chromatin organization involved in negative regulation of transcription		Predicted intracellular proteins	Nucleoplasm (Supported)				1.0	1.0	1.0	0.0	0.0	0.0	0.0	0.0	0.0	0.0	0.0	0.0	0.0	0.0	0.0	0.0	0.0	0.0	0.0	0.0
HIST2H2AC	8338	gene_synonym	H. sapiens	8338	H. sapiens	H2AC20	H2A clustered histone 20	GO:0006342 chromatin silencing;GO:0045814 negative regulation of gene expression, epigenetic;GO:0097549 chromatin organization involved in negative regulation of transcription		Predicted intracellular proteins	Nucleoplasm (Approved)				1.0	1.0	1.0	0.0	0.0	0.0	0.0	0.0	0.0	0.0	0.0	0.0	0.0	0.0	0.0	0.0	0.0	0.0	0.0	0.0
HIST2H2BA	337875	gene_synonym	H. sapiens	337875	H. sapiens	H2BP1	H2B histone pseudogene 1								0.0	0.0	0.0	0.0	0.0	0.0	0.0	0.0	0.0	0.0	0.0	0.0	0.0	0.0	0.0	0.0	0.0	0.0	0.0	0.0
HIST2H2BE	8349	gene_synonym	H. sapiens	8349	H. sapiens	H2BC21	H2B clustered histone 21	GO:0002227 innate immune response in mucosa;GO:0002385 mucosal immune response;GO:0002251 organ or tissue specific immune response		Predicted intracellular proteins	Nucleoplasm (Approved); Additional: Cytosol				1.0	1.0	0.0	0.0	0.0	0.0	0.0	0.0	0.0	0.0	0.0	0.0	0.0	0.0	0.0	0.0	0.0	0.0	0.0	0.0
HIST2H2BF	440689	gene_synonym	H. sapiens	440689	H. sapiens	H2BC18	H2B clustered histone 18	GO:0006334 nucleosome assembly;GO:0034728 nucleosome organization;GO:0031497 chromatin assembly		Predicted intracellular proteins	Nucleoplasm (Approved); Additional: Cytosol				1.0	1.0	0.0	0.0	0.0	0.0	0.0	0.0	0.0	0.0	0.0	0.0	0.0	0.0	0.0	0.0	0.0	0.0	0.0	0.0
HIST2H3D	653604	gene_synonym	H. sapiens	653604	H. sapiens	H3C13	H3 clustered histone 13	GO:0006334 nucleosome assembly;GO:0034728 nucleosome organization;GO:0031497 chromatin assembly		Predicted intracellular proteins					1.0	0.0	1.0	0.0	0.0	0.0	0.0	0.0	0.0	0.0	0.0	0.0	0.0	0.0	0.0	0.0	0.0	0.0	0.0	0.0
HIST3H2A	92815	gene_synonym	H. sapiens	92815	H. sapiens	H2AW	H2A.W histone	GO:0070914 UV-damage excision repair;GO:0006337 nucleosome disassembly;GO:0031498 chromatin disassembly		Predicted intracellular proteins	Nucleoplasm (Approved)			(M5939)HALLMARK P53 PATHWAY	1.0	1.0	1.0	0.0	0.0	0.0	0.0	0.0	0.0	0.0	0.0	0.0	0.0	0.0	0.0	0.0	0.0	0.0	0.0	0.0
HIST3H2BB	128312	gene_synonym	H. sapiens	128312	H. sapiens	H2BU1	H2B.U histone 1	GO:0006334 nucleosome assembly;GO:0034728 nucleosome organization;GO:0031497 chromatin assembly		Predicted intracellular proteins	Nucleoplasm (Approved); Additional: Cytosol				1.0	1.0	0.0	0.0	0.0	0.0	0.0	0.0	0.0	0.0	0.0	0.0	0.0	0.0	0.0	0.0	0.0	0.0	0.0	0.0
HIST4H4	121504	gene_synonym	H. sapiens	121504	H. sapiens	H4-16	H4 histone 16	GO:0045653 negative regulation of megakaryocyte differentiation;GO:0006335 DNA replication-dependent nucleosome assembly;GO:0034723 DNA replication-dependent nucleosome organization		Predicted intracellular proteins; Disease related genes	Nucleoplasm (Supported)				1.0	0.0	0.0	1.0	0.0	0.0	0.0	0.0	0.0	0.0	0.0	0.0	0.0	0.0	0.0	0.0	0.0	0.0	0.0	0.0
HMGA2	8091	symbol	H. sapiens	8091	H. sapiens	HMGA2	high mobility group AT-hook 2	GO:0003131 mesodermal-endodermal cell signaling;GO:2000685 positive regulation of cellular response to X-ray;GO:2000683 regulation of cellular response to X-ray		Cancer-related genes:Candidate cancer biomarkers; Predicted intracellular proteins; Disease related genes; Transcription factors:beta-Sheet binding to DNA	Nucleoli;Nucleoli rim;Nucleoplasm (Supported)				1.0	1.0	1.0	0.0	1.0	0.0	0.0	0.0	0.0	0.0	0.0	1.0	0.0	1.0	0.0	0.0	0.0	1.0	0.0	0.0
HMX3	340784	symbol	H. sapiens	340784	H. sapiens	HMX3	H6 family homeobox 3	GO:0050885 neuromuscular process controlling balance;GO:0007566 embryo implantation;GO:0060135 maternal process involved in female pregnancy		Predicted intracellular proteins; Transcription factors:Helix-turn-helix domains	Nucleoplasm (Approved); Additional: Centriolar satellite				0.0	0.0	0.0	0.0	1.0	0.0	1.0	0.0	0.0	1.0	0.0	0.0	0.0	0.0	0.0	0.0	0.0	0.0	0.0	0.0
HNRNPH2	3188	symbol	H. sapiens	3188	H. sapiens	HNRNPH2	heterogeneous nuclear ribonucleoprotein H2	GO:0043484 regulation of RNA splicing;GO:0008380 RNA splicing;GO:0006396 RNA processing		Predicted intracellular proteins; Disease related genes	Nucleoplasm (Enhanced)				0.0	0.0	0.0	0.0	0.0	0.0	0.0	1.0	0.0	0.0	0.0	0.0	0.0	0.0	0.0	0.0	0.0	0.0	0.0	0.0
HS6ST1	9394	symbol	H. sapiens	9394	H. sapiens	HS6ST1	heparan sulfate 6-O-sulfotransferase 1	GO:0015015 heparan sulfate proteoglycan biosynthetic process, enzymatic modification;GO:0015012 heparan sulfate proteoglycan biosynthetic process;GO:0030201 heparan sulfate proteoglycan metabolic process		Predicted intracellular proteins; Disease related genes	Nucleoplasm (Approved)				0.0	0.0	0.0	0.0	0.0	0.0	0.0	0.0	0.0	0.0	0.0	0.0	0.0	0.0	0.0	0.0	0.0	0.0	0.0	0.0
HSD17B10	3028	symbol	H. sapiens	3028	H. sapiens	HSD17B10	hydroxysteroid 17-beta dehydrogenase 10	GO:0062173 brexanolone metabolic process;GO:0070901 mitochondrial tRNA methylation;GO:0097745 mitochondrial tRNA 5'-end processing		Predicted intracellular proteins; Enzymes; ENZYME proteins:Oxidoreductases; Disease related genes; Potential drug targets		NADH; 1-Azepan-1-Yl-2-Phenyl-2-(4-Thioxo-1,4-Dihydro-Pyrazolo[3,4-D]Pyrimidin-5-Yl)Ethanone Adduct; Omega-3-carboxylic acids		(M5935)HALLMARK FATTY ACID METABOLISM; (M5936)HALLMARK OXIDATIVE PHOSPHORYLATION	0.0	0.0	0.0	0.0	0.0	0.0	0.0	1.0	0.0	0.0	0.0	0.0	0.0	0.0	0.0	1.0	0.0	0.0	0.0	0.0
HTR1D	3352	symbol	H. sapiens	3352	H. sapiens	HTR1D	5-hydroxytryptamine receptor 1D	GO:0014827 intestine smooth muscle contraction;GO:0007198 adenylate cyclase-inhibiting serotonin receptor signaling pathway;GO:0014831 gastro-intestinal system smooth muscle contraction		G-protein coupled receptors:Serotonin receptors; FDA approved drug targets:Small molecule drugs; G-protein coupled receptors:GPCRs excl olfactory receptors		Eletriptan; Ziprasidone; Cabergoline; Zolmitriptan; Dihydroergotamine; Amitriptyline; Clozapine; Loxapine; Lisuride; Sumatriptan; Ergotamine; Apomorphine; Trimipramine; Risperidone; Almotriptan; Naratriptan; Rizatriptan; Frovatriptan; Pergolide; Bromocriptine; Quetiapine; Aripiprazole; Paliperidone; Yohimbine; Lofexidine; NXN-188; Pizotifen; Aripiprazole lauroxil		(M5956)HALLMARK KRAS SIGNALING DN	0.0	0.0	0.0	0.0	0.0	0.0	0.0	0.0	0.0	0.0	0.0	0.0	0.0	0.0	0.0	0.0	0.0	0.0	0.0	0.0
HYOU1	10525	symbol	H. sapiens	10525	H. sapiens	HYOU1	hypoxia up-regulated 1	GO:0036483 neuron intrinsic apoptotic signaling pathway in response to endoplasmic reticulum stress;GO:1903381 regulation of endoplasmic reticulum stress-induced neuron intrinsic apoptotic signaling pathway;GO:1903382 negative regulation of endoplasmic reticulum stress-induced neuron intrinsic apoptotic signaling pathway		Predicted intracellular proteins				(M5922)HALLMARK UNFOLDED PROTEIN RESPONSE	1.0	0.0	0.0	0.0	0.0	0.0	0.0	0.0	0.0	0.0	0.0	0.0	0.0	0.0	0.0	0.0	0.0	0.0	0.0	0.0
IER3	8870	symbol	H. sapiens	8870	H. sapiens	IER3	immediate early response 3	GO:2001020 regulation of response to DNA damage stimulus;GO:0080135 regulation of cellular response to stress;GO:0006974 cellular response to DNA damage stimulus		Predicted intracellular proteins				(M5902)HALLMARK APOPTOSIS; (M5890)HALLMARK TNFA SIGNALING VIA NFKB; (M5891)HALLMARK HYPOXIA	0.0	0.0	0.0	0.0	0.0	0.0	0.0	0.0	0.0	0.0	0.0	0.0	0.0	0.0	0.0	0.0	0.0	0.0	0.0	1.0
IFT27	11020	symbol	H. sapiens	11020	H. sapiens	IFT27	intraflagellar transport 27	GO:0060122 inner ear receptor cell stereocilium organization;GO:0042073 intraciliary transport;GO:0060119 inner ear receptor cell development		Predicted intracellular proteins; Disease related genes	Mitochondria;Nucleoplasm (Approved)				0.0	0.0	0.0	0.0	0.0	0.0	1.0	0.0	0.0	0.0	0.0	0.0	0.0	0.0	0.0	0.0	0.0	1.0	0.0	0.0
IGF2BP1	10642	symbol	H. sapiens	10642	H. sapiens	IGF2BP1	insulin like growth factor 2 mRNA binding protein 1	GO:0022013 pallium cell proliferation in forebrain;GO:0010610 regulation of mRNA stability involved in response to stress;GO:0070934 CRD-mediated mRNA stabilization		Predicted intracellular proteins	Cytosol (Supported)		(M223)PID BETA CATENIN NUC PATHWAY		0.0	0.0	0.0	0.0	0.0	0.0	0.0	1.0	0.0	1.0	1.0	0.0	0.0	0.0	0.0	0.0	0.0	0.0	0.0	1.0
IGF2BP3	10643	symbol	H. sapiens	10643	H. sapiens	IGF2BP3	insulin like growth factor 2 mRNA binding protein 3	GO:0051028 mRNA transport;GO:0050657 nucleic acid transport;GO:0050658 RNA transport		Predicted intracellular proteins	Cytosol (Supported)				0.0	0.0	0.0	0.0	0.0	0.0	0.0	1.0	0.0	0.0	0.0	0.0	0.0	0.0	0.0	0.0	0.0	0.0	0.0	0.0
IGFBP7	3490	symbol	H. sapiens	3490	H. sapiens	IGFBP7	insulin like growth factor binding protein 7	GO:0051414 response to cortisol;GO:0007566 embryo implantation;GO:0050810 regulation of steroid biosynthetic process		Predicted secreted proteins; Disease related genes	Golgi apparatus (Approved)	Insulin pork	(M3008)NABA ECM GLYCOPROTEINS; (M5884)NABA CORE MATRISOME; (M5889)NABA MATRISOME	(M5909)HALLMARK MYOGENESIS	1.0	0.0	0.0	0.0	0.0	0.0	0.0	0.0	0.0	0.0	0.0	0.0	0.0	0.0	0.0	0.0	0.0	0.0	0.0	0.0
IGFBP7-AS1	255130	symbol	H. sapiens	255130	H. sapiens	IGFBP7-AS1	IGFBP7 antisense RNA 1								0.0	0.0	0.0	0.0	0.0	0.0	0.0	0.0	0.0	0.0	0.0	0.0	0.0	0.0	0.0	0.0	0.0	0.0	0.0	0.0
IL11	3589	symbol	H. sapiens	3589	H. sapiens	IL11	interleukin 11	GO:1903659 regulation of complement-dependent cytotoxicity;GO:0097278 complement-dependent cytotoxicity;GO:2000352 negative regulation of endothelial cell apoptotic process		Cancer-related genes:Candidate cancer biomarkers; Predicted intracellular proteins; Predicted secreted proteins			(M5883)NABA SECRETED FACTORS; (M5885)NABA MATRISOME ASSOCIATED; (M5889)NABA MATRISOME	(M5950)HALLMARK ALLOGRAFT REJECTION	1.0	0.0	1.0	0.0	0.0	0.0	0.0	0.0	0.0	0.0	0.0	0.0	0.0	0.0	0.0	0.0	0.0	0.0	0.0	0.0
IP6K3	117283	symbol	H. sapiens	117283	H. sapiens	IP6K3	inositol hexakisphosphate kinase 3	GO:0032958 inositol phosphate biosynthetic process;GO:0043647 inositol phosphate metabolic process;GO:0046173 polyol biosynthetic process		ENZYME proteins:Transferases; Predicted intracellular proteins; Enzymes	Nucleoplasm (Approved); Additional: Cytosol				0.0	0.0	0.0	0.0	0.0	0.0	0.0	0.0	0.0	0.0	0.0	0.0	0.0	0.0	0.0	0.0	0.0	0.0	0.0	0.0
IQGAP2	10788	symbol	H. sapiens	10788	H. sapiens	IQGAP2	IQ motif containing GTPase activating protein 2	GO:0070493 thrombin-activated receptor signaling pathway;GO:2000249 regulation of actin cytoskeleton reorganization;GO:0034314 Arp2/3 complex-mediated actin nucleation		Predicted intracellular proteins	Plasma membrane;Vesicles (Approved)			(M5908)HALLMARK ANDROGEN RESPONSE	1.0	0.0	0.0	0.0	0.0	0.0	0.0	0.0	0.0	0.0	0.0	0.0	0.0	0.0	0.0	0.0	0.0	0.0	0.0	0.0
IRF2BP1	26145	symbol	H. sapiens	26145	H. sapiens	IRF2BP1	interferon regulatory factor 2 binding protein 1	GO:0000209 protein polyubiquitination;GO:0016567 protein ubiquitination;GO:0032446 protein modification by small protein conjugation		ENZYME proteins:Transferases; Predicted intracellular proteins; Enzymes	Nucleoplasm (Supported)				0.0	0.0	0.0	0.0	0.0	0.0	0.0	0.0	0.0	0.0	0.0	0.0	0.0	0.0	0.0	0.0	0.0	0.0	0.0	0.0
IRF3	3661	symbol	H. sapiens	3661	H. sapiens	IRF3	interferon regulatory factor 3	GO:0035666 TRIF-dependent toll-like receptor signaling pathway;GO:0071888 macrophage apoptotic process;GO:0039530 MDA-5 signaling pathway		Predicted intracellular proteins; Disease related genes; Transcription factors:Helix-turn-helix domains	Cytosol (Supported)				1.0	0.0	1.0	0.0	0.0	0.0	0.0	0.0	0.0	0.0	0.0	0.0	0.0	0.0	0.0	0.0	0.0	0.0	0.0	0.0
IRF7	3665	symbol	H. sapiens	3665	H. sapiens	IRF7	interferon regulatory factor 7	GO:0019043 establishment of viral latency;GO:0034127 regulation of MyD88-independent toll-like receptor signaling pathway;GO:2000110 negative regulation of macrophage apoptotic process		Predicted intracellular proteins; Disease related genes; Transcription factors:Helix-turn-helix domains	Nucleoplasm (Supported); Additional: Cytosol		(M2)PID SMAD2 3NUCLEAR PATHWAY	(M5911)HALLMARK INTERFERON ALPHA RESPONSE; (M5913)HALLMARK INTERFERON GAMMA RESPONSE; (M5921)HALLMARK COMPLEMENT	1.0	0.0	1.0	0.0	0.0	0.0	0.0	0.0	0.0	0.0	0.0	0.0	0.0	0.0	0.0	0.0	0.0	0.0	0.0	0.0
IRGQ	126298	symbol	H. sapiens	126298	H. sapiens	IRGQ	immunity related GTPase Q			Predicted intracellular proteins	Vesicles (Approved)				0.0	0.0	0.0	0.0	0.0	0.0	0.0	0.0	0.0	0.0	0.0	0.0	0.0	0.0	0.0	0.0	0.0	0.0	0.0	0.0
IRS1	3667	symbol	H. sapiens	3667	H. sapiens	IRS1	insulin receptor substrate 1	GO:0032000 positive regulation of fatty acid beta-oxidation;GO:0045725 positive regulation of glycogen biosynthetic process;GO:0046321 positive regulation of fatty acid oxidation		Predicted intracellular proteins; Disease related genes	Cytosol;Nucleoplasm (Supported); Additional: Plasma membrane	[4-({5-(AMINOCARBONYL)-4-[(3-METHYLPHENYL)AMINO]PYRIMIDIN-2-YL}AMINO)PHENYL]ACETIC ACID	(M268)PID S1P S1P2 PATHWAY; (M1718)SIG IL4RECEPTOR IN B LYPHOCYTES; (M125)PID IGF1 PATHWAY	(M5942)HALLMARK UV RESPONSE DN; (M5915)HALLMARK APICAL JUNCTION	0.0	0.0	1.0	0.0	0.0	0.0	0.0	0.0	0.0	0.0	0.0	0.0	0.0	0.0	0.0	1.0	1.0	0.0	1.0	1.0
ISG15	9636	symbol	H. sapiens	9636	H. sapiens	ISG15	ISG15 ubiquitin like modifier	GO:0032459 regulation of protein oligomerization;GO:0032461 positive regulation of protein oligomerization;GO:0032020 ISG15-protein conjugation		Predicted intracellular proteins; Predicted secreted proteins; Disease related genes				(M5911)HALLMARK INTERFERON ALPHA RESPONSE; (M5913)HALLMARK INTERFERON GAMMA RESPONSE	1.0	0.0	1.0	0.0	0.0	0.0	0.0	0.0	0.0	0.0	0.0	0.0	0.0	0.0	1.0	0.0	0.0	0.0	0.0	0.0
ISL2	64843	symbol	H. sapiens	64843	H. sapiens	ISL2	ISL LIM homeobox 2	GO:0021524 visceral motor neuron differentiation;GO:0021520 spinal cord motor neuron cell fate specification;GO:0048934 peripheral nervous system neuron differentiation		Predicted intracellular proteins; Transcription factors:Helix-turn-helix domains	Rods & Rings (Approved)				0.0	0.0	0.0	1.0	0.0	0.0	0.0	0.0	0.0	1.0	1.0	0.0	0.0	0.0	0.0	0.0	0.0	0.0	0.0	0.0
ISYNA1	51477	symbol	H. sapiens	51477	H. sapiens	ISYNA1	inositol-3-phosphate synthase 1	GO:0006021 inositol biosynthetic process;GO:0006020 inositol metabolic process;GO:0046173 polyol biosynthetic process		Predicted intracellular proteins; ENZYME proteins:Isomerase; Enzymes	Nucleoplasm (Approved); Additional: Cytosol	2-Deoxy-D-Glucitol 6-(E)-Vinylhomophosphonate; 2-Deoxy-Glucitol-6-Phosphate; Glycerin			0.0	0.0	0.0	0.0	0.0	0.0	0.0	0.0	0.0	0.0	0.0	0.0	0.0	0.0	0.0	0.0	0.0	0.0	0.0	0.0
ITGA10	8515	symbol	H. sapiens	8515	H. sapiens	ITGA10	integrin subunit alpha 10	GO:0007229 integrin-mediated signaling pathway;GO:0007160 cell-matrix adhesion;GO:0031589 cell-substrate adhesion					(M47)PID INTEGRIN CS PATHWAY; (M67)PID ARF6 TRAFFICKING PATHWAY; (M18)PID INTEGRIN1 PATHWAY	(M5915)HALLMARK APICAL JUNCTION	0.0	0.0	1.0	0.0	0.0	0.0	0.0	1.0	0.0	0.0	0.0	0.0	0.0	0.0	0.0	0.0	1.0	0.0	0.0	0.0
ITGA3	3675	symbol	H. sapiens	3675	H. sapiens	ITGA3	integrin subunit alpha 3	GO:0097062 dendritic spine maintenance;GO:0035024 negative regulation of Rho protein signal transduction;GO:0035640 exploration behavior		Cancer-related genes:Candidate cancer biomarkers; Predicted intracellular proteins; Disease related genes; CD markers	Plasma membrane (Supported)		(M47)PID INTEGRIN CS PATHWAY; (M69)PID REELIN PATHWAY; (M196)PID IL23 PATHWAY	(M5915)HALLMARK APICAL JUNCTION	0.0	0.0	1.0	0.0	1.0	1.0	0.0	0.0	1.0	0.0	1.0	0.0	0.0	1.0	0.0	0.0	1.0	1.0	0.0	0.0
ITGB4	3691	symbol	H. sapiens	3691	H. sapiens	ITGB4	integrin subunit beta 4	GO:0032290 peripheral nervous system myelin formation;GO:0031581 hemidesmosome assembly;GO:0035878 nail development		Cancer-related genes:Candidate cancer biomarkers; Predicted intracellular proteins; Disease related genes; CD markers	Cell Junctions;Plasma membrane (Supported)	R1295	(M158)PID INTEGRIN4 PATHWAY; (M47)PID INTEGRIN CS PATHWAY; (M65)PID FRA PATHWAY	(M5909)HALLMARK MYOGENESIS; (M5915)HALLMARK APICAL JUNCTION; (M5939)HALLMARK P53 PATHWAY	0.0	0.0	0.0	0.0	1.0	0.0	0.0	0.0	0.0	0.0	1.0	0.0	0.0	1.0	0.0	0.0	1.0	0.0	0.0	0.0
ITPRIP	85450	symbol	H. sapiens	85450	H. sapiens	ITPRIP	inositol 1,4,5-trisphosphate receptor interacting protein	GO:1902042 negative regulation of extrinsic apoptotic signaling pathway via death domain receptors;GO:1902041 regulation of extrinsic apoptotic signaling pathway via death domain receptors;GO:0008625 extrinsic apoptotic signaling pathway via death domain receptors			Vesicles (Uncertain)				0.0	0.0	0.0	0.0	0.0	0.0	0.0	0.0	0.0	0.0	0.0	0.0	0.0	0.0	0.0	0.0	0.0	0.0	0.0	0.0
JAG1	182	symbol	H. sapiens	182	H. sapiens	JAG1	jagged canonical Notch ligand 1	GO:0061444 endocardial cushion cell development;GO:0061443 endocardial cushion cell differentiation;GO:0061073 ciliary body morphogenesis		Predicted intracellular proteins; Disease related genes; CD markers	Golgi apparatus;Plasma membrane (Approved)		(M256)PID TAP63 PATHWAY; (M17)PID NOTCH PATHWAY	(M5903)HALLMARK NOTCH SIGNALING; (M5944)HALLMARK ANGIOGENESIS; (M5895)HALLMARK WNT BETA CATENIN SIGNALING	1.0	0.0	0.0	1.0	1.0	0.0	1.0	0.0	1.0	0.0	0.0	0.0	0.0	1.0	1.0	0.0	0.0	1.0	1.0	1.0
JAG2	3714	symbol	H. sapiens	3714	H. sapiens	JAG2	jagged canonical Notch ligand 2	GO:1990134 epithelial cell apoptotic process involved in palatal shelf morphogenesis;GO:0009912 auditory receptor cell fate commitment;GO:0060120 inner ear receptor cell fate commitment			Vesicles (Supported); Additional: Cytosol		(M17)PID NOTCH PATHWAY; (M19)PID P73PATHWAY	(M5944)HALLMARK ANGIOGENESIS; (M5895)HALLMARK WNT BETA CATENIN SIGNALING; (M5939)HALLMARK P53 PATHWAY	1.0	0.0	0.0	0.0	1.0	0.0	1.0	0.0	0.0	0.0	0.0	1.0	0.0	0.0	0.0	0.0	0.0	0.0	1.0	1.0
JAK3	3718	symbol	H. sapiens	3718	H. sapiens	JAK3	Janus kinase 3	GO:0045219 regulation of FasL production;GO:0045221 negative regulation of FasL production;GO:0002731 negative regulation of dendritic cell cytokine production	Tyr protein kinase family	ENZYME proteins:Transferases; Kinases:Tyr protein kinases; Predicted intracellular proteins; FDA approved drug targets:Small molecule drugs; Enzymes; Disease related genes; Cancer-related genes	Cytosol;Plasma membrane (Approved)	2-tert-butyl-9-fluoro-1,6-dihydrobenzo[h]imidazo[4,5-f]isoquinolin-7-one; R-348; Tofacitinib; Baricitinib; Fostamatinib; Zanubrutinib	(M5248)ST JAK STAT PATHWAY; (M9174)ST STAT3 PATHWAY; (M9378)ST INTERLEUKIN 4 PATHWAY		1.0	0.0	1.0	1.0	0.0	1.0	0.0	0.0	0.0	0.0	0.0	0.0	0.0	0.0	0.0	1.0	1.0	0.0	0.0	1.0
JUNB	3726	symbol	H. sapiens	3726	H. sapiens	JUNB	JunB proto-oncogene, AP-1 transcription factor subunit	GO:0060136 embryonic process involved in female pregnancy;GO:0001829 trophectodermal cell differentiation;GO:0060716 labyrinthine layer blood vessel development		Predicted intracellular proteins; Transcription factors:Basic domains	Nucleoplasm (Supported)		(M235)PID TCR CALCIUM PATHWAY; (M65)PID FRA PATHWAY; (M60)PID NFAT TFPATHWAY	(M5938)HALLMARK REACTIVE OXYGEN SPECIES PATHWAY; (M5896)HALLMARK TGF BETA SIGNALING; (M5941)HALLMARK UV RESPONSE UP	1.0	0.0	1.0	0.0	1.0	0.0	0.0	0.0	0.0	0.0	0.0	0.0	0.0	1.0	1.0	0.0	1.0	0.0	0.0	1.0
JUP	3728	symbol	H. sapiens	3728	H. sapiens	JUP	junction plakoglobin	GO:0071603 endothelial cell-cell adhesion;GO:0002159 desmosome assembly;GO:0071680 response to indole-3-methanol		Cancer-related genes:Candidate cancer biomarkers; Predicted intracellular proteins; Disease related genes	Cell Junctions;Plasma membrane (Supported); Additional: Vesicles	Zinc; Zinc acetate	(M184)PID ECADHERIN KERATINOCYTE PATHWAY; (M266)PID NCADHERIN PATHWAY; (M156)PID ECADHERIN NASCENT AJ PATHWAY	(M5915)HALLMARK APICAL JUNCTION; (M5934)HALLMARK XENOBIOTIC METABOLISM; (M5953)HALLMARK KRAS SIGNALING UP	1.0	0.0	1.0	0.0	0.0	1.0	0.0	0.0	0.0	0.0	0.0	0.0	0.0	1.0	0.0	0.0	1.0	0.0	1.0	0.0
KCNAB3	9196	symbol	H. sapiens	9196	H. sapiens	KCNAB3	potassium voltage-gated channel subfamily A regulatory beta subunit 3	GO:1901379 regulation of potassium ion transmembrane transport;GO:0043266 regulation of potassium ion transport;GO:0071805 potassium ion transmembrane transport		Predicted intracellular proteins	Mitochondria (Approved)				0.0	0.0	0.0	0.0	0.0	0.0	0.0	0.0	0.0	0.0	0.0	0.0	0.0	0.0	0.0	0.0	0.0	0.0	0.0	0.0
KCNE4	23704	symbol	H. sapiens	23704	H. sapiens	KCNE4	potassium voltage-gated channel subfamily E regulatory subunit 4	GO:1902260 negative regulation of delayed rectifier potassium channel activity;GO:0098915 membrane repolarization during ventricular cardiac muscle cell action potential;GO:0097623 potassium ion export across plasma membrane			Microtubules (Approved); Additional: Nuclear bodies				0.0	0.0	0.0	0.0	0.0	0.0	0.0	0.0	0.0	0.0	0.0	0.0	0.0	0.0	0.0	0.0	0.0	0.0	0.0	0.0
KCNG2	26251	symbol	H. sapiens	26251	H. sapiens	KCNG2	potassium voltage-gated channel modifier subfamily G member 2	GO:0051260 protein homooligomerization;GO:0008016 regulation of heart contraction;GO:0071805 potassium ion transmembrane transport		Voltage-gated ion channels:Voltage-Gated Potassium Channels					0.0	0.0	0.0	0.0	0.0	0.0	0.0	0.0	0.0	0.0	0.0	0.0	0.0	0.0	0.0	0.0	0.0	0.0	0.0	0.0
KCNK3	3777	symbol	H. sapiens	3777	H. sapiens	KCNK3	potassium two pore domain channel subfamily K member 3	GO:0051481 negative regulation of cytosolic calcium ion concentration;GO:0030322 stabilization of membrane potential;GO:0071294 cellular response to zinc ion		Transporters:Transporter channels and pores; FDA approved drug targets:Small molecule drugs; Voltage-gated ion channels:Two-P Potassium Channels; Disease related genes		Doxapram; Halothane			0.0	0.0	0.0	0.0	0.0	0.0	1.0	0.0	0.0	1.0	0.0	0.0	0.0	0.0	0.0	0.0	0.0	0.0	0.0	0.0
KCNMB1	3779	symbol	H. sapiens	3779	H. sapiens	KCNMB1	potassium calcium-activated channel subfamily M regulatory beta subunit 1	GO:1903413 cellular response to bile acid;GO:1903412 response to bile acid;GO:0005513 detection of calcium ion		FDA approved drug targets:Small molecule drugs; Transporters:Accessory Factors Involved in Transport				(M5956)HALLMARK KRAS SIGNALING DN	0.0	0.0	1.0	0.0	0.0	0.0	0.0	0.0	0.0	0.0	0.0	0.0	0.0	0.0	0.0	0.0	0.0	0.0	0.0	0.0
KCNN2	3781	symbol	H. sapiens	3781	H. sapiens	KCNN2	potassium calcium-activated channel subfamily N member 2	GO:0098914 membrane repolarization during atrial cardiac muscle cell action potential;GO:0099624 atrial cardiac muscle cell membrane repolarization;GO:0086014 atrial cardiac muscle cell action potential		Transporters:Transporter channels and pores; Voltage-gated ion channels:Calcium-Activated Potassium Channels; FDA approved drug targets:Small molecule drugs	Nucleoplasm;Plasma membrane (Uncertain)				0.0	0.0	0.0	0.0	0.0	0.0	0.0	0.0	0.0	0.0	0.0	0.0	0.0	0.0	0.0	0.0	0.0	0.0	0.0	0.0
KCTD13	253980	symbol	H. sapiens	253980	H. sapiens	KCTD13	potassium channel tetramerization domain containing 13	GO:0035024 negative regulation of Rho protein signal transduction;GO:0045740 positive regulation of DNA replication;GO:0046580 negative regulation of Ras protein signal transduction		Predicted intracellular proteins; Disease related genes	Nuclear bodies;Nucleoplasm (Supported)				1.0	0.0	0.0	0.0	0.0	0.0	0.0	0.0	0.0	0.0	0.0	0.0	0.0	0.0	0.0	0.0	0.0	0.0	0.0	0.0
KCTD16	57528	symbol	H. sapiens	57528	H. sapiens	KCTD16	potassium channel tetramerization domain containing 16	GO:0008277 regulation of G protein-coupled receptor signaling pathway;GO:0051260 protein homooligomerization;GO:0051259 protein complex oligomerization		Predicted intracellular proteins	Nuclear speckles (Approved)				0.0	0.0	0.0	0.0	0.0	0.0	0.0	0.0	0.0	0.0	0.0	0.0	0.0	0.0	0.0	0.0	0.0	0.0	0.0	0.0
KDM5C	8242	symbol	H. sapiens	8242	H. sapiens	KDM5C	lysine demethylase 5C	GO:0034721 histone H3-K4 demethylation, trimethyl-H3-K4-specific;GO:0034720 histone H3-K4 demethylation;GO:0070076 histone lysine demethylation		Transcription factors:Helix-turn-helix domains; Cancer-related genes:Mutated cancer genes; Predicted intracellular proteins; Disease related genes; Cancer-related genes:Mutational cancer driver genes	Nucleoplasm (Enhanced); Additional: Cytosol				1.0	0.0	0.0	0.0	0.0	0.0	0.0	0.0	0.0	0.0	0.0	0.0	0.0	0.0	0.0	0.0	0.0	0.0	0.0	0.0
KDM6B	23135	symbol	H. sapiens	23135	H. sapiens	KDM6B	lysine demethylase 6B	GO:0071557 histone H3-K27 demethylation;GO:0060992 response to fungicide;GO:0070076 histone lysine demethylation		Predicted intracellular proteins	Nuclear speckles (Approved)			(M5890)HALLMARK TNFA SIGNALING VIA NFKB	1.0	0.0	0.0	0.0	1.0	0.0	0.0	0.0	1.0	1.0	0.0	0.0	0.0	0.0	0.0	0.0	0.0	0.0	0.0	0.0
KIAA0895L	653319	symbol	H. sapiens	653319	H. sapiens	KIAA0895L	KIAA0895 like			Predicted intracellular proteins	Nucleoplasm;Vesicles (Approved)				0.0	0.0	0.0	0.0	0.0	0.0	0.0	0.0	0.0	0.0	0.0	0.0	0.0	0.0	0.0	0.0	0.0	0.0	0.0	0.0
KIAA1217	56243	symbol	H. sapiens	56243	H. sapiens	KIAA1217	KIAA1217	GO:0048706 embryonic skeletal system development;GO:0001501 skeletal system development;GO:0043009 chordate embryonic development		Predicted intracellular proteins	Cytosol;Nucleoplasm (Approved)				0.0	0.0	0.0	0.0	1.0	0.0	0.0	0.0	0.0	0.0	0.0	1.0	0.0	0.0	0.0	0.0	0.0	0.0	0.0	0.0
KIAA1456	57604	gene_synonym	H. sapiens	57604	H. sapiens	TRMT9B	tRNA methyltransferase 9B (putative)	GO:0002098 tRNA wobble uridine modification;GO:0002097 tRNA wobble base modification;GO:0030488 tRNA methylation		Predicted intracellular proteins	Nucleoplasm (Approved); Additional: Cytosol				0.0	0.0	0.0	0.0	0.0	0.0	0.0	1.0	0.0	0.0	0.0	0.0	0.0	0.0	0.0	0.0	0.0	0.0	0.0	0.0
KIAA1875	340390	gene_synonym	H. sapiens	340390	H. sapiens	WDR97	WD repeat domain 97			Predicted intracellular proteins					0.0	0.0	0.0	0.0	0.0	0.0	0.0	0.0	0.0	0.0	0.0	0.0	0.0	0.0	0.0	0.0	0.0	0.0	0.0	0.0
KISS1	3814	symbol	H. sapiens	3814	H. sapiens	KISS1	KiSS-1 metastasis suppressor	GO:0060112 generation of ovulation cycle rhythm;GO:0033686 positive regulation of luteinizing hormone secretion;GO:0033684 regulation of luteinizing hormone secretion		Cancer-related genes:Candidate cancer biomarkers; Predicted secreted proteins; Disease related genes	Vesicles (Approved)				0.0	0.0	0.0	0.0	0.0	0.0	0.0	0.0	0.0	0.0	0.0	0.0	0.0	0.0	0.0	0.0	0.0	0.0	0.0	0.0
KLHL13	90293	symbol	H. sapiens	90293	H. sapiens	KLHL13	kelch like family member 13	GO:0032465 regulation of cytokinesis;GO:0000910 cytokinesis;GO:0051302 regulation of cell division		Predicted intracellular proteins	Cytosol (Approved)		(M14)PID AURORA B PATHWAY		0.0	0.0	0.0	0.0	0.0	0.0	0.0	0.0	0.0	0.0	0.0	0.0	0.0	0.0	0.0	0.0	0.0	0.0	0.0	1.0
KLHL26	55295	symbol	H. sapiens	55295	H. sapiens	KLHL26	kelch like family member 26			Predicted intracellular proteins					0.0	0.0	0.0	0.0	0.0	0.0	0.0	0.0	0.0	0.0	0.0	0.0	0.0	0.0	0.0	0.0	0.0	0.0	0.0	0.0
KMT2E-AS1	100216545	symbol	H. sapiens	100216545	H. sapiens	KMT2E-AS1	KMT2E antisense RNA 1								0.0	0.0	0.0	0.0	0.0	0.0	0.0	0.0	0.0	0.0	0.0	0.0	0.0	0.0	0.0	0.0	0.0	0.0	0.0	0.0
KRT17	3872	symbol	H. sapiens	3872	H. sapiens	KRT17	keratin 17	GO:0051798 positive regulation of hair follicle development;GO:0051797 regulation of hair follicle development;GO:0045109 intermediate filament organization		Cancer-related genes:Candidate cancer biomarkers; Predicted intracellular proteins; Disease related genes	Intermediate filaments (Enhanced)		(M115)PID REG GR PATHWAY	(M5939)HALLMARK P53 PATHWAY	0.0	0.0	0.0	0.0	1.0	0.0	0.0	0.0	0.0	0.0	0.0	0.0	0.0	0.0	0.0	0.0	0.0	0.0	0.0	0.0
KRT18	3875	symbol	H. sapiens	3875	H. sapiens	KRT18	keratin 18	GO:1902488 cholangiocyte apoptotic process;GO:0043000 Golgi to plasma membrane CFTR protein transport;GO:0009750 response to fructose		Cancer-related genes:Candidate cancer biomarkers; Predicted intracellular proteins; Disease related genes	Cytosol (Supported)		(M220)PID CASPASE PATHWAY	(M5910)HALLMARK PROTEIN SECRETION; (M5902)HALLMARK APOPTOSIS; (M5906)HALLMARK ESTROGEN RESPONSE EARLY	0.0	0.0	0.0	0.0	0.0	0.0	0.0	0.0	0.0	0.0	0.0	0.0	0.0	0.0	0.0	0.0	0.0	1.0	0.0	0.0
KRT8	3856	symbol	H. sapiens	3856	H. sapiens	KRT8	keratin 8	GO:0051599 response to hydrostatic pressure;GO:0009415 response to water;GO:0097284 hepatocyte apoptotic process		Cancer-related genes:Candidate cancer biomarkers; Predicted intracellular proteins; Disease related genes	Intermediate filaments (Supported)	Tenecteplase; Lanoteplase; Copper	(M229)PID P38 ALPHA BETA DOWNSTREAM PATHWAY	(M5908)HALLMARK ANDROGEN RESPONSE; (M5906)HALLMARK ESTROGEN RESPONSE EARLY	0.0	0.0	0.0	0.0	1.0	0.0	0.0	0.0	1.0	0.0	1.0	0.0	0.0	0.0	0.0	0.0	0.0	0.0	0.0	0.0
KRT80	144501	symbol	H. sapiens	144501	H. sapiens	KRT80	keratin 80			Predicted intracellular proteins	Intermediate filaments (Enhanced)				0.0	0.0	0.0	0.0	0.0	0.0	0.0	0.0	0.0	0.0	0.0	0.0	0.0	0.0	0.0	0.0	0.0	0.0	0.0	0.0
LAGE3	8270	symbol	H. sapiens	8270	H. sapiens	LAGE3	L antigen family member 3	GO:0070525 tRNA threonylcarbamoyladenosine metabolic process;GO:0008033 tRNA processing;GO:0006399 tRNA metabolic process		Predicted intracellular proteins; Disease related genes	Nucleoplasm (Supported); Additional: Nuclear bodies				0.0	0.0	0.0	0.0	0.0	0.0	0.0	1.0	0.0	0.0	0.0	0.0	0.0	0.0	0.0	0.0	0.0	0.0	0.0	0.0
LAMA5	3911	symbol	H. sapiens	3911	H. sapiens	LAMA5	laminin subunit alpha 5	GO:0060445 branching involved in salivary gland morphogenesis;GO:0007435 salivary gland morphogenesis;GO:0007431 salivary gland development		Predicted intracellular proteins; Predicted secreted proteins	Vesicles (Approved); Additional: Nucleoplasm	Lanoteplase	(M158)PID INTEGRIN4 PATHWAY; (M5887)NABA BASEMENT MEMBRANES; (M198)PID SYNDECAN 1 PATHWAY		0.0	0.0	1.0	0.0	1.0	1.0	0.0	0.0	1.0	0.0	1.0	0.0	0.0	1.0	0.0	0.0	1.0	1.0	0.0	0.0
LAT	27040	symbol	H. sapiens	27040	H. sapiens	LAT	linker for activation of T cells	GO:0043303 mast cell degranulation;GO:0002279 mast cell activation involved in immune response;GO:0002448 mast cell mediated immunity		Predicted intracellular proteins; Disease related genes; RAS pathway related proteins	Plasma membrane (Supported); Additional: Golgi apparatus		(M190)PID TCR JNK PATHWAY; (M9526)ST T CELL SIGNAL TRANSDUCTION; (M141)PID PI3KCI PATHWAY		0.0	0.0	1.0	0.0	0.0	0.0	0.0	0.0	0.0	0.0	0.0	0.0	0.0	0.0	0.0	0.0	0.0	0.0	0.0	1.0
LDB3	11155	symbol	H. sapiens	11155	H. sapiens	LDB3	LIM domain binding 3	GO:0045214 sarcomere organization;GO:0030239 myofibril assembly;GO:0055002 striated muscle cell development		Predicted intracellular proteins; Disease related genes	Cytosol;Focal adhesion sites (Supported); Additional: Nucleoplasm			(M5909)HALLMARK MYOGENESIS	0.0	0.0	0.0	0.0	0.0	0.0	0.0	0.0	1.0	0.0	1.0	0.0	0.0	0.0	0.0	0.0	0.0	0.0	0.0	0.0
LDLR	3949	symbol	H. sapiens	3949	H. sapiens	LDLR	low density lipoprotein receptor	GO:0010899 regulation of phosphatidylcholine catabolic process;GO:1905167 positive regulation of lysosomal protein catabolic process;GO:0061771 response to caloric restriction		Predicted intracellular proteins; Disease related genes		Porfimer sodium		(M5892)HALLMARK CHOLESTEROL HOMEOSTASIS; (M5942)HALLMARK UV RESPONSE DN; (M5890)HALLMARK TNFA SIGNALING VIA NFKB	0.0	0.0	0.0	1.0	0.0	0.0	0.0	0.0	0.0	0.0	1.0	0.0	0.0	1.0	0.0	1.0	0.0	0.0	1.0	0.0
LDLRAD2	401944	symbol	H. sapiens	401944	H. sapiens	LDLRAD2	low density lipoprotein receptor class A domain containing 2			Predicted secreted proteins					0.0	0.0	0.0	0.0	0.0	0.0	0.0	0.0	0.0	0.0	0.0	0.0	0.0	0.0	0.0	0.0	0.0	0.0	0.0	0.0
LGR5	8549	symbol	H. sapiens	8549	H. sapiens	LGR5	leucine rich repeat containing G protein-coupled receptor 5	GO:2001013 epithelial cell proliferation involved in renal tubule morphogenesis;GO:0007190 activation of adenylate cyclase activity;GO:0009994 oocyte differentiation		G-protein coupled receptors:GPCRs excl olfactory receptors	Golgi apparatus (Approved); Additional: Nucleoplasm				1.0	0.0	0.0	0.0	1.0	0.0	1.0	0.0	0.0	0.0	0.0	0.0	0.0	0.0	0.0	0.0	0.0	1.0	0.0	0.0
LHX2	9355	symbol	H. sapiens	9355	H. sapiens	LHX2	LIM homeobox 2	GO:0035090 maintenance of apical/basal cell polarity;GO:0045199 maintenance of epithelial cell apical/basal polarity;GO:0021978 telencephalon regionalization		Predicted intracellular proteins; Transcription factors:Helix-turn-helix domains	Nucleoplasm (Approved)			(M5941)HALLMARK UV RESPONSE UP	0.0	1.0	0.0	1.0	1.0	0.0	1.0	1.0	0.0	1.0	1.0	0.0	1.0	0.0	0.0	0.0	0.0	0.0	0.0	0.0
LHX9	56956	symbol	H. sapiens	56956	H. sapiens	LHX9	LIM homeobox 9	GO:0097380 dorsal spinal cord interneuron anterior axon guidance;GO:0097378 dorsal spinal cord interneuron axon guidance;GO:0035262 gonad morphogenesis		Predicted intracellular proteins; Transcription factors:Helix-turn-helix domains	Nucleoplasm (Approved)			(M5937)HALLMARK GLYCOLYSIS	0.0	0.0	0.0	0.0	0.0	0.0	0.0	1.0	0.0	0.0	1.0	0.0	0.0	0.0	0.0	0.0	0.0	0.0	0.0	0.0
LIF	3976	symbol	H. sapiens	3976	H. sapiens	LIF	LIF interleukin 6 family cytokine	GO:1901676 positive regulation of histone H3-K27 acetylation;GO:0043974 histone H3-K27 acetylation;GO:1901674 regulation of histone H3-K27 acetylation		Cancer-related genes:Candidate cancer biomarkers; Predicted intracellular proteins; Predicted secreted proteins	Cytosol (Supported)		(M65)PID FRA PATHWAY; (M145)PID P53 DOWNSTREAM PATHWAY; (M5883)NABA SECRETED FACTORS	(M5947)HALLMARK IL2 STAT5 SIGNALING; (M5890)HALLMARK TNFA SIGNALING VIA NFKB; (M5932)HALLMARK INFLAMMATORY RESPONSE	1.0	0.0	1.0	0.0	1.0	0.0	0.0	0.0	1.0	0.0	1.0	0.0	0.0	0.0	0.0	1.0	0.0	1.0	0.0	0.0
LIMD1	8994	symbol	H. sapiens	8994	H. sapiens	LIMD1	LIM domain containing 1	GO:0035331 negative regulation of hippo signaling;GO:0002076 osteoblast development;GO:0035330 regulation of hippo signaling		Predicted intracellular proteins	Focal adhesion sites;Nucleoplasm (Supported)				1.0	0.0	1.0	1.0	0.0	0.0	0.0	0.0	0.0	0.0	0.0	0.0	0.0	0.0	1.0	1.0	0.0	0.0	0.0	1.0
LIN7A	8825	symbol	H. sapiens	8825	H. sapiens	LIN7A	lin-7 homolog A, crumbs cell polarity complex component	GO:1903361 protein localization to basolateral plasma membrane;GO:0035090 maintenance of apical/basal cell polarity;GO:0045199 maintenance of epithelial cell apical/basal polarity		Predicted intracellular proteins					0.0	0.0	0.0	0.0	0.0	0.0	1.0	0.0	0.0	0.0	0.0	0.0	0.0	0.0	0.0	0.0	0.0	0.0	0.0	0.0
LINC00273	649159	symbol	H. sapiens	649159	H. sapiens	LINC00273	long intergenic non-protein coding RNA 273								0.0	0.0	0.0	0.0	0.0	0.0	0.0	0.0	0.0	0.0	0.0	0.0	0.0	0.0	0.0	0.0	0.0	0.0	0.0	0.0
LINC00473	90632	symbol	H. sapiens	90632	H. sapiens	LINC00473	long intergenic non-protein coding RNA 473	GO:0006351 transcription, DNA-templated;GO:0097659 nucleic acid-templated transcription;GO:0032774 RNA biosynthetic process							0.0	0.0	0.0	0.0	0.0	0.0	0.0	0.0	0.0	0.0	0.0	0.0	0.0	0.0	0.0	0.0	0.0	0.0	0.0	0.0
LINC00643	646113	symbol	H. sapiens	646113	H. sapiens	LINC00643	long intergenic non-protein coding RNA 643								0.0	0.0	0.0	0.0	0.0	0.0	0.0	0.0	0.0	0.0	0.0	0.0	0.0	0.0	0.0	0.0	0.0	0.0	0.0	0.0
LINC00670	284034	symbol	H. sapiens	284034	H. sapiens	LINC00670	long intergenic non-protein coding RNA 670								0.0	0.0	0.0	0.0	0.0	0.0	0.0	0.0	0.0	0.0	0.0	0.0	0.0	0.0	0.0	0.0	0.0	0.0	0.0	0.0
LINC01197	400456	gene_synonym	H. sapiens	400456	H. sapiens	LETR1	lymphatic endothelial transcriptional regulator lncRNA 1								0.0	0.0	0.0	0.0	0.0	0.0	0.0	0.0	0.0	0.0	0.0	0.0	0.0	0.0	0.0	0.0	0.0	0.0	0.0	0.0
LINC01336	51301	gene_synonym	H. sapiens	51301	H. sapiens	GCNT4	glucosaminyl (N-acetyl) transferase 4	GO:0002121 inter-male aggressive behavior;GO:0002118 aggressive behavior;GO:0042403 thyroid hormone metabolic process		ENZYME proteins:Transferases; Predicted intracellular proteins; Enzymes	Golgi apparatus (Supported); Additional: Nucleoplasm				0.0	0.0	0.0	0.0	1.0	0.0	0.0	0.0	0.0	0.0	0.0	0.0	0.0	0.0	0.0	0.0	0.0	1.0	0.0	0.0
LINC01521	54944	symbol	H. sapiens	54944	H. sapiens	LINC01521	long intergenic non-protein coding RNA 1521								0.0	0.0	0.0	0.0	0.0	0.0	0.0	0.0	0.0	0.0	0.0	0.0	0.0	0.0	0.0	0.0	0.0	0.0	0.0	0.0
LIPG	9388	symbol	H. sapiens	9388	H. sapiens	LIPG	lipase G, endothelial type	GO:0010983 positive regulation of high-density lipoprotein particle clearance;GO:0010982 regulation of high-density lipoprotein particle clearance;GO:0010986 positive regulation of lipoprotein particle clearance		Predicted intracellular proteins; Predicted secreted proteins; ENZYME proteins:Hydrolases; Enzymes					0.0	0.0	0.0	0.0	0.0	0.0	0.0	0.0	0.0	0.0	0.0	0.0	0.0	0.0	0.0	0.0	0.0	0.0	0.0	0.0
LOC100131315	100131315	Gene_ID	H. sapiens	100131315	H. sapiens	GREM1-AS1	GREM1 antisense RNA 1								0.0	0.0	0.0	0.0	0.0	0.0	0.0	0.0	0.0	0.0	0.0	0.0	0.0	0.0	0.0	0.0	0.0	0.0	0.0	0.0
LOC100133091	100133091	Gene_ID	H. sapiens	100133091	H. sapiens	LOC100133091	uncharacterized LOC100133091								0.0	0.0	0.0	0.0	0.0	0.0	0.0	0.0	0.0	0.0	0.0	0.0	0.0	0.0	0.0	0.0	0.0	0.0	0.0	0.0
LOC100134868	100134868	Gene_ID	H. sapiens	100134868	H. sapiens	LOC100134868	uncharacterized LOC100134868								0.0	0.0	0.0	0.0	0.0	0.0	0.0	0.0	0.0	0.0	0.0	0.0	0.0	0.0	0.0	0.0	0.0	0.0	0.0	0.0
LOC100287042	100287042	Gene_ID	H. sapiens	100287042	H. sapiens	MIF4GD-DT	MIF4GD divergent transcript								0.0	0.0	0.0	0.0	0.0	0.0	0.0	0.0	0.0	0.0	0.0	0.0	0.0	0.0	0.0	0.0	0.0	0.0	0.0	0.0
LOC100288069	100288069	Gene_ID	H. sapiens	100288069	H. sapiens	LOC100288069	uncharacterized LOC100288069								0.0	0.0	0.0	0.0	0.0	0.0	0.0	0.0	0.0	0.0	0.0	0.0	0.0	0.0	0.0	0.0	0.0	0.0	0.0	0.0
LOC100288162	100288162	Gene_ID	H. sapiens	100288162	H. sapiens	LOC100288162	uncharacterized LOC100288162								0.0	0.0	0.0	0.0	0.0	0.0	0.0	0.0	0.0	0.0	0.0	0.0	0.0	0.0	0.0	0.0	0.0	0.0	0.0	0.0
LOC100289580	100289580	Gene_ID	H. sapiens	100289580	H. sapiens	LOC100289580	uncharacterized LOC100289580								0.0	0.0	0.0	0.0	0.0	0.0	0.0	0.0	0.0	0.0	0.0	0.0	0.0	0.0	0.0	0.0	0.0	0.0	0.0	0.0
LOC100499194	100499194	Gene_ID	H. sapiens	100499194	H. sapiens	LOC100499194	uncharacterized LOC100499194								0.0	0.0	0.0	0.0	0.0	0.0	0.0	0.0	0.0	0.0	0.0	0.0	0.0	0.0	0.0	0.0	0.0	0.0	0.0	0.0
LOC100507156	100507156	Gene_ID	H. sapiens	100507156	H. sapiens	LOC100507156	uncharacterized LOC100507156								0.0	0.0	0.0	0.0	0.0	0.0	0.0	0.0	0.0	0.0	0.0	0.0	0.0	0.0	0.0	0.0	0.0	0.0	0.0	0.0
LOC101448202	101448202	Gene_ID	H. sapiens	101448202	H. sapiens	LOC101448202	uncharacterized LOC101448202								0.0	0.0	0.0	0.0	0.0	0.0	0.0	0.0	0.0	0.0	0.0	0.0	0.0	0.0	0.0	0.0	0.0	0.0	0.0	0.0
LOC101926963	101926963	Gene_ID	H. sapiens	101926963	H. sapiens	PRKAR1B-AS1	PRKAR1B antisense RNA 1								0.0	0.0	0.0	0.0	0.0	0.0	0.0	0.0	0.0	0.0	0.0	0.0	0.0	0.0	0.0	0.0	0.0	0.0	0.0	0.0
LOC102723854	102723854	Gene_ID	H. sapiens	102723854	H. sapiens	LINC01819	long intergenic non-protein coding RNA 1819								0.0	0.0	0.0	0.0	0.0	0.0	0.0	0.0	0.0	0.0	0.0	0.0	0.0	0.0	0.0	0.0	0.0	0.0	0.0	0.0
LOC221946	221946	Gene_ID	H. sapiens	221946	H. sapiens	LOC221946	uncharacterized LOC221946								0.0	0.0	0.0	0.0	0.0	0.0	0.0	0.0	0.0	0.0	0.0	0.0	0.0	0.0	0.0	0.0	0.0	0.0	0.0	0.0
LOC339059	339059	Gene_ID	H. sapiens	339059	H. sapiens	LOC339059	uncharacterized LOC339059								0.0	0.0	0.0	0.0	0.0	0.0	0.0	0.0	0.0	0.0	0.0	0.0	0.0	0.0	0.0	0.0	0.0	0.0	0.0	0.0
LOC389199	389199	Gene_ID	H. sapiens	389199	H. sapiens	LOC389199	uncharacterized LOC389199								0.0	0.0	0.0	0.0	0.0	0.0	0.0	0.0	0.0	0.0	0.0	0.0	0.0	0.0	0.0	0.0	0.0	0.0	0.0	0.0
LOC389906	389906	Gene_ID	H. sapiens	389906	H. sapiens	LOC389906	zinc finger protein 839 pseudogene								0.0	0.0	0.0	0.0	0.0	0.0	0.0	0.0	0.0	0.0	0.0	0.0	0.0	0.0	0.0	0.0	0.0	0.0	0.0	0.0
LOC439994	439994	Gene_ID	H. sapiens	439994	H. sapiens	LINC00863	long intergenic non-protein coding RNA 863								0.0	0.0	0.0	0.0	0.0	0.0	0.0	0.0	0.0	0.0	0.0	0.0	0.0	0.0	0.0	0.0	0.0	0.0	0.0	0.0
LOC553103	553103	Gene_ID	H. sapiens	553103	H. sapiens	MIR3936HG	MIR3936 host gene								0.0	0.0	0.0	0.0	0.0	0.0	0.0	0.0	0.0	0.0	0.0	0.0	0.0	0.0	0.0	0.0	0.0	0.0	0.0	0.0
LOC728392	728392	Gene_ID	H. sapiens	728392	H. sapiens	LOC728392	uncharacterized LOC728392								0.0	0.0	0.0	0.0	0.0	0.0	0.0	0.0	0.0	0.0	0.0	0.0	0.0	0.0	0.0	0.0	0.0	0.0	0.0	0.0
LONRF2	164832	symbol	H. sapiens	164832	H. sapiens	LONRF2	LON peptidase N-terminal domain and ring finger 2			Predicted intracellular proteins	Nucleoplasm (Approved)				0.0	0.0	0.0	0.0	0.0	0.0	0.0	0.0	0.0	0.0	0.0	0.0	0.0	0.0	0.0	0.0	0.0	0.0	0.0	0.0
LOXL2	4017	symbol	H. sapiens	4017	H. sapiens	LOXL2	lysyl oxidase like 2	GO:0018057 peptidyl-lysine oxidation;GO:1902455 negative regulation of stem cell population maintenance;GO:0018158 protein oxidation		Predicted intracellular proteins; Predicted secreted proteins; Enzymes; ENZYME proteins:Oxidoreductases	Nucleoplasm (Enhanced)		(M3468)NABA ECM REGULATORS; (M5885)NABA MATRISOME ASSOCIATED; (M5889)NABA MATRISOME	(M5930)HALLMARK EPITHELIAL MESENCHYMAL TRANSITION	0.0	0.0	0.0	0.0	0.0	0.0	0.0	0.0	0.0	0.0	0.0	1.0	0.0	1.0	0.0	0.0	0.0	1.0	0.0	0.0
LPPR3	79948	gene_synonym	H. sapiens	79948	H. sapiens	PLPPR3	phospholipid phosphatase related 3	GO:0046839 phospholipid dephosphorylation;GO:0030258 lipid modification;GO:0006644 phospholipid metabolic process		ENZYME proteins:Hydrolases; Enzymes	Golgi apparatus (Approved); Additional: Cytosol;Nucleoplasm				0.0	0.0	0.0	0.0	0.0	0.0	0.0	0.0	0.0	0.0	0.0	0.0	0.0	0.0	0.0	0.0	0.0	0.0	0.0	0.0
LRP5	4041	symbol	H. sapiens	4041	H. sapiens	LRP5	LDL receptor related protein 5	GO:0060764 cell-cell signaling involved in mammary gland development;GO:0110135 Norrin signaling pathway;GO:0035426 extracellular matrix-cell signaling		Predicted intracellular proteins; Disease related genes			(M77)PID WNT SIGNALING PATHWAY; (M266)PID NCADHERIN PATHWAY; (M5493)WNT SIGNALING		1.0	0.0	0.0	1.0	1.0	0.0	1.0	0.0	0.0	0.0	0.0	1.0	0.0	1.0	1.0	1.0	0.0	1.0	1.0	1.0
LRRC17	10234	symbol	H. sapiens	10234	H. sapiens	LRRC17	leucine rich repeat containing 17	GO:0048539 bone marrow development;GO:0045671 negative regulation of osteoclast differentiation;GO:0033687 osteoblast proliferation		Predicted secreted proteins	Vesicles (Approved); Additional: Cytokinetic bridge				1.0	0.0	0.0	1.0	0.0	0.0	0.0	0.0	0.0	0.0	0.0	1.0	0.0	0.0	1.0	0.0	0.0	0.0	0.0	0.0
LRRC56	115399	symbol	H. sapiens	115399	H. sapiens	LRRC56	leucine rich repeat containing 56	GO:0030030 cell projection organization;GO:0016043 cellular component organization;GO:0071840 cellular component organization or biogenesis		Predicted intracellular proteins					0.0	0.0	0.0	0.0	0.0	0.0	0.0	0.0	0.0	0.0	0.0	0.0	0.0	0.0	0.0	0.0	0.0	0.0	0.0	0.0
LRRN3	54674	symbol	H. sapiens	54674	H. sapiens	LRRN3	leucine rich repeat neuronal 3	GO:0051965 positive regulation of synapse assembly;GO:0051963 regulation of synapse assembly;GO:1901890 positive regulation of cell junction assembly		Predicted intracellular proteins	Cytosol;Nucleoplasm (Approved)				0.0	0.0	0.0	0.0	0.0	0.0	0.0	0.0	0.0	0.0	1.0	0.0	0.0	0.0	0.0	0.0	0.0	0.0	0.0	0.0
LRRTM2	26045	symbol	H. sapiens	26045	H. sapiens	LRRTM2	leucine rich repeat transmembrane neuronal 2	GO:0099151 regulation of postsynaptic density assembly;GO:0099150 regulation of postsynaptic specialization assembly;GO:0002091 negative regulation of receptor internalization		Predicted intracellular proteins					0.0	0.0	0.0	0.0	0.0	0.0	0.0	0.0	0.0	0.0	1.0	0.0	0.0	0.0	0.0	0.0	0.0	0.0	0.0	0.0
LSM7	51690	symbol	H. sapiens	51690	H. sapiens	LSM7	LSM7 homolog, U6 small nuclear RNA and mRNA degradation associated	GO:0000956 nuclear-transcribed mRNA catabolic process;GO:0006402 mRNA catabolic process;GO:0006401 RNA catabolic process		Predicted intracellular proteins	Nucleoli fibrillar center (Approved)			(M5926)HALLMARK MYC TARGETS V1	0.0	0.0	0.0	0.0	0.0	0.0	0.0	1.0	0.0	0.0	0.0	0.0	0.0	0.0	0.0	0.0	0.0	0.0	0.0	0.0
LUC7L2	51631	symbol	H. sapiens	51631	H. sapiens	LUC7L2	LUC7 like 2, pre-mRNA splicing factor	GO:0006376 mRNA splice site selection;GO:0000245 spliceosomal complex assembly;GO:0022618 ribonucleoprotein complex assembly		Predicted intracellular proteins	Nucleoplasm (Approved)				0.0	0.0	0.0	0.0	0.0	0.0	0.0	1.0	0.0	0.0	0.0	0.0	0.0	0.0	0.0	0.0	0.0	0.0	0.0	0.0
LUZP2	338645	symbol	H. sapiens	338645	H. sapiens	LUZP2	leucine zipper protein 2			Predicted intracellular proteins; Predicted secreted proteins	Cytosol;Nucleoplasm (Approved); Additional: Plasma membrane				0.0	0.0	0.0	0.0	0.0	0.0	0.0	0.0	0.0	0.0	0.0	0.0	0.0	0.0	0.0	0.0	0.0	0.0	0.0	0.0
LY6K	54742	symbol	H. sapiens	54742	H. sapiens	LY6K	lymphocyte antigen 6 family member K	GO:0007339 binding of sperm to zona pellucida;GO:0035036 sperm-egg recognition;GO:0009988 cell-cell recognition		Predicted secreted proteins	Plasma membrane (Approved); Additional: Nucleoplasm				0.0	0.0	0.0	0.0	0.0	0.0	0.0	0.0	0.0	0.0	0.0	0.0	0.0	0.0	0.0	0.0	0.0	0.0	0.0	0.0
LYPD1	116372	symbol	H. sapiens	116372	H. sapiens	LYPD1	LY6/PLAUR domain containing 1	GO:0095500 acetylcholine receptor signaling pathway;GO:1905144 response to acetylcholine;GO:1905145 cellular response to acetylcholine		Predicted intracellular proteins	Nucleoplasm (Approved); Additional: Plasma membrane;Vesicles				0.0	0.0	0.0	0.0	0.0	0.0	0.0	0.0	0.0	0.0	0.0	0.0	0.0	0.0	0.0	0.0	0.0	0.0	0.0	0.0
LZTS1	11178	symbol	H. sapiens	11178	H. sapiens	LZTS1	leucine zipper tumor suppressor 1	GO:0016242 negative regulation of macroautophagy;GO:0048814 regulation of dendrite morphogenesis;GO:0010507 negative regulation of autophagy		Predicted intracellular proteins; Disease related genes	Plasma membrane (Approved); Additional: Nucleoli				0.0	0.0	0.0	0.0	0.0	0.0	0.0	0.0	0.0	0.0	1.0	0.0	0.0	0.0	0.0	0.0	0.0	0.0	0.0	0.0
MAB21L2	10586	symbol	H. sapiens	10586	H. sapiens	MAB21L2	mab-21 like 2	GO:0010172 embryonic body morphogenesis;GO:0010171 body morphogenesis;GO:0043010 camera-type eye development		Predicted intracellular proteins; Disease related genes	Nucleoplasm (Enhanced)				0.0	0.0	0.0	0.0	1.0	0.0	1.0	0.0	0.0	0.0	0.0	0.0	0.0	0.0	0.0	0.0	0.0	0.0	0.0	0.0
MAD2L2	10459	symbol	H. sapiens	10459	H. sapiens	MAD2L2	mitotic arrest deficient 2 like 2	GO:2000048 negative regulation of cell-cell adhesion mediated by cadherin;GO:0010944 negative regulation of transcription by competitive promoter binding;GO:1904667 negative regulation of ubiquitin protein ligase activity		Cancer-related genes:Candidate cancer biomarkers; Predicted intracellular proteins; Disease related genes	Cytosol (Supported); Additional: Nucleoli				1.0	0.0	0.0	1.0	0.0	0.0	0.0	0.0	0.0	0.0	0.0	0.0	0.0	0.0	0.0	0.0	0.0	1.0	0.0	0.0
MAFG-AS1	92659	gene_synonym	H. sapiens	92659	H. sapiens	MAFG-DT	MAFG divergent transcript								0.0	0.0	0.0	0.0	0.0	0.0	0.0	0.0	0.0	0.0	0.0	0.0	0.0	0.0	0.0	0.0	0.0	0.0	0.0	0.0
MAFK	7975	symbol	H. sapiens	7975	H. sapiens	MAFK	MAF bZIP transcription factor K	GO:0000122 negative regulation of transcription by RNA polymerase II;GO:0045892 negative regulation of transcription, DNA-templated;GO:1903507 negative regulation of nucleic acid-templated transcription		Predicted intracellular proteins; Transcription factors:Basic domains	Nucleoplasm (Enhanced)				1.0	0.0	1.0	0.0	0.0	0.0	0.0	0.0	0.0	0.0	0.0	0.0	0.0	0.0	0.0	0.0	0.0	0.0	0.0	1.0
MALAT1	378938	symbol	H. sapiens	378938	H. sapiens	MALAT1	metastasis associated lung adenocarcinoma transcript 1	GO:0110024 positive regulation of cardiac muscle myoblast proliferation;GO:0110021 cardiac muscle myoblast proliferation;GO:0110022 regulation of cardiac muscle myoblast proliferation							0.0	0.0	0.0	0.0	0.0	0.0	0.0	0.0	0.0	0.0	0.0	0.0	0.0	1.0	0.0	0.0	0.0	0.0	0.0	0.0
MAP3K5	4217	symbol	H. sapiens	4217	H. sapiens	MAP3K5	mitogen-activated protein kinase kinase kinase 5	GO:0010663 positive regulation of striated muscle cell apoptotic process;GO:0010666 positive regulation of cardiac muscle cell apoptotic process;GO:1900745 positive regulation of p38MAPK cascade	STE Ser/Thr protein kinase family	ENZYME proteins:Transferases; Predicted intracellular proteins; Kinases:STE Ser/Thr protein kinases; Enzymes	Cytosol (Supported)		(M20)PID P38 MKK3 6PATHWAY; (M197)PID HIV NEF PATHWAY; (M249)PID PI3KCI AKT PATHWAY		1.0	0.0	0.0	0.0	0.0	0.0	0.0	0.0	0.0	0.0	0.0	0.0	0.0	0.0	0.0	1.0	0.0	0.0	0.0	0.0
MAP3K9	4293	symbol	H. sapiens	4293	H. sapiens	MAP3K9	mitogen-activated protein kinase kinase kinase 9	GO:0046777 protein autophosphorylation;GO:0043065 positive regulation of apoptotic process;GO:0043068 positive regulation of programmed cell death	STE Ser/Thr protein kinase family	ENZYME proteins:Transferases; Predicted intracellular proteins; Enzymes; Disease related genes; Kinases:STE Ser/Thr protein kinases; Potential drug targets	Nucleoli;Nucleoplasm (Approved)	12-(2-hydroxyethyl)-2-(1-methylethoxy)-13,14-dihydronaphtho[2,1-a]pyrrolo[3,4-c]carbazol-5(12H)-one; Fostamatinib	(M3721)ST JNK MAPK PATHWAY		0.0	0.0	0.0	0.0	0.0	0.0	0.0	0.0	0.0	0.0	0.0	0.0	0.0	0.0	0.0	0.0	0.0	0.0	0.0	0.0
MAP4K2	5871	symbol	H. sapiens	5871	H. sapiens	MAP4K2	mitogen-activated protein kinase kinase kinase kinase 2	GO:0043507 positive regulation of JUN kinase activity;GO:0006903 vesicle targeting;GO:0043506 regulation of JUN kinase activity	STE Ser/Thr protein kinase family	ENZYME proteins:Transferases; Predicted intracellular proteins; Kinases:STE Ser/Thr protein kinases; Enzymes	Vesicles (Approved)	Fostamatinib	(M128)PID TNF PATHWAY	(M5915)HALLMARK APICAL JUNCTION	0.0	0.0	0.0	0.0	0.0	0.0	0.0	0.0	0.0	0.0	0.0	0.0	0.0	0.0	0.0	0.0	0.0	0.0	0.0	0.0
MAP6D1	79929	symbol	H. sapiens	79929	H. sapiens	MAP6D1	MAP6 domain containing 1	GO:0018009 N-terminal peptidyl-L-cysteine N-palmitoylation;GO:0006500 N-terminal protein palmitoylation;GO:0006498 N-terminal protein lipidation		Predicted intracellular proteins	Cytosol (Approved)				0.0	0.0	0.0	0.0	0.0	0.0	0.0	0.0	0.0	0.0	0.0	0.0	0.0	0.0	0.0	0.0	0.0	0.0	0.0	0.0
MCAM	4162	symbol	H. sapiens	4162	H. sapiens	MCAM	melanoma cell adhesion molecule	GO:0061042 vascular wound healing;GO:0003094 glomerular filtration;GO:0097205 renal filtration		CD markers	Plasma membrane (Approved)				1.0	0.0	0.0	0.0	0.0	0.0	0.0	0.0	0.0	0.0	0.0	0.0	0.0	1.0	0.0	0.0	0.0	0.0	0.0	0.0
MCF2L	23263	symbol	H. sapiens	23263	H. sapiens	MCF2L	MCF.2 cell line derived transforming sequence like	GO:0051056 regulation of small GTPase mediated signal transduction;GO:0007264 small GTPase mediated signal transduction;GO:1902531 regulation of intracellular signal transduction		Predicted intracellular proteins			(M83)PID CDC42 REG PATHWAY; (M68)PID RHOA REG PATHWAY; (M187)PID TRKR PATHWAY		1.0	0.0	0.0	0.0	0.0	0.0	0.0	0.0	0.0	0.0	0.0	0.0	0.0	0.0	0.0	0.0	0.0	0.0	0.0	0.0
MDGA1	266727	symbol	H. sapiens	266727	H. sapiens	MDGA1	MAM domain containing glycosylphosphatidylinositol anchor 1	GO:0099179 regulation of synaptic membrane adhesion;GO:0021527 spinal cord association neuron differentiation;GO:0021516 dorsal spinal cord development		Predicted intracellular proteins	Plasma membrane (Supported); Additional: Golgi apparatus			(M5916)HALLMARK APICAL SURFACE	0.0	0.0	0.0	0.0	0.0	0.0	0.0	0.0	0.0	1.0	0.0	0.0	0.0	0.0	0.0	0.0	0.0	0.0	0.0	0.0
MDK	4192	symbol	H. sapiens	4192	H. sapiens	MDK	midkine	GO:0030421 defecation;GO:0106091 glial cell projection elongation;GO:1905555 positive regulation of blood vessel branching		Cancer-related genes:Candidate cancer biomarkers; Predicted secreted proteins	Vesicles (Approved)		(M165)PID SYNDECAN 4 PATHWAY; (M277)PID INTEGRIN A4B1 PATHWAY; (M18)PID INTEGRIN1 PATHWAY	(M5907)HALLMARK ESTROGEN RESPONSE LATE; (M5915)HALLMARK APICAL JUNCTION	1.0	0.0	0.0	1.0	1.0	0.0	0.0	0.0	0.0	1.0	1.0	1.0	0.0	1.0	1.0	0.0	1.0	1.0	0.0	0.0
MDP1	145553	symbol	H. sapiens	145553	H. sapiens	MDP1	magnesium dependent phosphatase 1	GO:0030389 fructosamine metabolic process;GO:0006040 amino sugar metabolic process;GO:0035335 peptidyl-tyrosine dephosphorylation		Predicted intracellular proteins; ENZYME proteins:Hydrolases; Enzymes	Nucleoplasm (Approved)				0.0	0.0	0.0	0.0	0.0	0.0	0.0	0.0	0.0	0.0	0.0	0.0	0.0	0.0	0.0	0.0	0.0	0.0	0.0	0.0
MECOM	2122	symbol	H. sapiens	2122	H. sapiens	MECOM	MDS1 and EVI1 complex locus	GO:0071425 hematopoietic stem cell proliferation;GO:0051567 histone H3-K9 methylation;GO:0046329 negative regulation of JNK cascade		Cancer-related genes:Mutational cancer driver genes; Predicted intracellular proteins; Disease related genes; Transcription factors:Zinc-coordinating DNA-binding domains	Nuclear speckles (Supported)				1.0	0.0	0.0	0.0	0.0	1.0	0.0	0.0	0.0	0.0	0.0	0.0	0.0	0.0	0.0	0.0	0.0	0.0	0.0	1.0
MEG9	100507257	symbol	H. sapiens	100507257	H. sapiens	MEG9	maternally expressed 9								0.0	0.0	0.0	0.0	0.0	0.0	0.0	0.0	0.0	0.0	0.0	0.0	0.0	0.0	0.0	0.0	0.0	0.0	0.0	0.0
MEGF8	1954	symbol	H. sapiens	1954	H. sapiens	MEGF8	multiple EGF like domains 8	GO:0055113 epiboly involved in gastrulation with mouth forming second;GO:0097155 fasciculation of sensory neuron axon;GO:0060971 embryonic heart tube left/right pattern formation		Predicted intracellular proteins; Disease related genes			(M5883)NABA SECRETED FACTORS; (M5885)NABA MATRISOME ASSOCIATED; (M5889)NABA MATRISOME		0.0	0.0	0.0	0.0	1.0	0.0	0.0	0.0	1.0	0.0	1.0	1.0	0.0	1.0	0.0	0.0	0.0	0.0	0.0	0.0
MEST	4232	symbol	H. sapiens	4232	H. sapiens	MEST	mesoderm specific transcript	GO:0010883 regulation of lipid storage;GO:0019915 lipid storage;GO:0007498 mesoderm development		Predicted intracellular proteins	Cytosol;Golgi apparatus (Approved)			(M5907)HALLMARK ESTROGEN RESPONSE LATE; (M5930)HALLMARK EPITHELIAL MESENCHYMAL TRANSITION	0.0	0.0	0.0	0.0	0.0	0.0	0.0	0.0	0.0	0.0	0.0	0.0	0.0	0.0	0.0	0.0	0.0	0.0	0.0	0.0
MEX3A	92312	symbol	H. sapiens	92312	H. sapiens	MEX3A	mex-3 RNA binding family member A			Predicted intracellular proteins	Cytosol (Supported)				0.0	0.0	0.0	0.0	0.0	0.0	0.0	0.0	0.0	0.0	0.0	0.0	0.0	0.0	0.0	0.0	0.0	0.0	0.0	0.0
MEX3D	399664	symbol	H. sapiens	399664	H. sapiens	MEX3D	mex-3 RNA binding family member D	GO:0010609 mRNA localization resulting in posttranscriptional regulation of gene expression;GO:0008298 intracellular mRNA localization;GO:0061157 mRNA destabilization		Predicted intracellular proteins					0.0	0.0	0.0	0.0	0.0	0.0	0.0	0.0	0.0	0.0	0.0	0.0	0.0	0.0	0.0	0.0	0.0	0.0	0.0	0.0
MFHAS1	9258	symbol	H. sapiens	9258	H. sapiens	MFHAS1	multifunctional ROCO family signaling regulator 1	GO:0034137 positive regulation of toll-like receptor 2 signaling pathway;GO:0034136 negative regulation of toll-like receptor 2 signaling pathway;GO:0034135 regulation of toll-like receptor 2 signaling pathway		Predicted intracellular proteins; Disease related genes	Nucleoplasm (Approved); Additional: Cytosol			(M5945)HALLMARK HEME METABOLISM	1.0	0.0	0.0	0.0	0.0	0.0	0.0	0.0	0.0	0.0	0.0	0.0	0.0	0.0	0.0	0.0	0.0	0.0	0.0	0.0
MGAM	8972	symbol	H. sapiens	8972	H. sapiens	MGAM	maltase-glucoamylase	GO:0005982 starch metabolic process;GO:0005983 starch catabolic process;GO:0000023 maltose metabolic process		FDA approved drug targets:Small molecule drugs; ENZYME proteins:Hydrolases; Enzymes		Acarbose; Miglitol; Voglibose			0.0	0.0	0.0	0.0	0.0	0.0	0.0	0.0	0.0	0.0	0.0	0.0	0.0	0.0	0.0	0.0	0.0	0.0	0.0	0.0
MGAT3	4248	symbol	H. sapiens	4248	H. sapiens	MGAT3	beta-1,4-mannosyl-glycoprotein 4-beta-N-acetylglucosaminyltransferase	GO:1904351 negative regulation of protein catabolic process in the vacuole;GO:1905166 negative regulation of lysosomal protein catabolic process;GO:1902965 regulation of protein localization to early endosome		ENZYME proteins:Transferases; Predicted intracellular proteins; Enzymes			(M232)PID ECADHERIN STABILIZATION PATHWAY		0.0	0.0	0.0	0.0	0.0	0.0	0.0	0.0	0.0	0.0	0.0	0.0	0.0	0.0	0.0	0.0	0.0	0.0	0.0	0.0
MIB2	142678	symbol	H. sapiens	142678	H. sapiens	MIB2	MIB E3 ubiquitin protein ligase 2	GO:0007219 Notch signaling pathway;GO:0043123 positive regulation of I-kappaB kinase/NF-kappaB signaling;GO:0043122 regulation of I-kappaB kinase/NF-kappaB signaling		ENZYME proteins:Transferases; Predicted intracellular proteins; Enzymes					1.0	0.0	0.0	0.0	0.0	0.0	0.0	0.0	0.0	0.0	0.0	0.0	0.0	0.0	0.0	0.0	0.0	0.0	0.0	1.0
MIR320A	407037	symbol	H. sapiens	407037	H. sapiens	MIR320A	microRNA 320a	GO:0032713 negative regulation of interleukin-4 production;GO:0010663 positive regulation of striated muscle cell apoptotic process;GO:0010666 positive regulation of cardiac muscle cell apoptotic process							0.0	0.0	1.0	0.0	0.0	0.0	0.0	0.0	0.0	0.0	0.0	0.0	0.0	1.0	0.0	1.0	0.0	0.0	0.0	0.0
MIR4466	100616154	symbol	H. sapiens	100616154	H. sapiens	MIR4466	microRNA 4466								0.0	0.0	0.0	0.0	0.0	0.0	0.0	0.0	0.0	0.0	0.0	0.0	0.0	0.0	0.0	0.0	0.0	0.0	0.0	0.0
MIR4532						None	None	None	None	None	None	None	None	None	nan	nan	nan	nan	nan	nan	nan	nan	nan	nan	nan	nan	nan	nan	nan	nan	nan	nan	nan	nan
MIR663AHG	284801	symbol	H. sapiens	284801	H. sapiens	MIR663AHG	MIR663A host gene								0.0	0.0	0.0	0.0	0.0	0.0	0.0	0.0	0.0	0.0	0.0	0.0	0.0	0.0	0.0	0.0	0.0	0.0	0.0	0.0
MITF	4286	symbol	H. sapiens	4286	H. sapiens	MITF	melanocyte inducing transcription factor	GO:0044336 canonical Wnt signaling pathway involved in negative regulation of apoptotic process;GO:0030318 melanocyte differentiation;GO:0050931 pigment cell differentiation		Predicted intracellular proteins; Disease related genes; Transcription factors:Basic domains; Cancer-related genes			(M229)PID P38 ALPHA BETA DOWNSTREAM PATHWAY; (M183)PID IL6 7 PATHWAY; (M231)PID KIT PATHWAY		1.0	0.0	1.0	0.0	0.0	1.0	1.0	0.0	0.0	0.0	0.0	0.0	1.0	0.0	0.0	0.0	0.0	0.0	0.0	0.0
MLLT11	10962	symbol	H. sapiens	10962	H. sapiens	MLLT11	MLLT11 transcription factor 7 cofactor	GO:0051901 positive regulation of mitochondrial depolarization;GO:1904181 positive regulation of membrane depolarization;GO:0051900 regulation of mitochondrial depolarization		Cancer-related genes:Candidate cancer biomarkers; Predicted intracellular proteins; Disease related genes	Cytosol;Nucleoplasm (Supported)			(M5924)HALLMARK MTORC1 SIGNALING	0.0	0.0	0.0	0.0	0.0	0.0	0.0	0.0	0.0	0.0	0.0	0.0	0.0	0.0	0.0	0.0	0.0	0.0	0.0	0.0
MMAB	326625	symbol	H. sapiens	326625	H. sapiens	MMAB	metabolism of cobalamin associated B	GO:0009235 cobalamin metabolic process;GO:0033013 tetrapyrrole metabolic process;GO:0006767 water-soluble vitamin metabolic process		ENZYME proteins:Transferases; Predicted intracellular proteins; Enzymes; Disease related genes; Potential drug targets	Mitochondria (Approved)				0.0	0.0	0.0	0.0	0.0	0.0	0.0	0.0	0.0	0.0	0.0	0.0	0.0	0.0	0.0	0.0	0.0	0.0	0.0	0.0
MMP13	4322	symbol	H. sapiens	4322	H. sapiens	MMP13	matrix metallopeptidase 13	GO:0003417 growth plate cartilage development;GO:0003416 endochondral bone growth;GO:0001958 endochondral ossification		Cancer-related genes:Candidate cancer biomarkers; Predicted secreted proteins; FDA approved drug targets:Small molecule drugs; Enzymes; Disease related genes; Peptidases:Metallopeptidases		Marimastat; 3-Methylpyridine; 2-{4-[4-(4-Chloro-Phenoxy)-Benzenesulfonyl]-Tetrahydro-Pyran-4-Yl}-N-Hydroxy-Acetamide; WAY-151693; Hydroxyaminovaline; 4-methoxybenzenesulfinate; PYRIMIDINE-4,6-DICARBOXYLIC ACID BIS-(3-METHYL-BENZYLAMIDE); PYRIMIDINE-4,6-DICARBOXYLIC ACID BIS-(4-FLUORO-3-METHYL-BENZYLAMIDE); PYRIMIDINE-4,6-DICARBOXYLIC ACID BIS-[(PYRIDIN-3-YLMETHYL)-AMIDE]; Endostatin; TERT-BUTYL 4…	(M174)PID UPA UPAR PATHWAY; (M3468)NABA ECM REGULATORS; (M5885)NABA MATRISOME ASSOCIATED	(M5921)HALLMARK COMPLEMENT	0.0	0.0	0.0	0.0	0.0	0.0	0.0	0.0	0.0	0.0	0.0	1.0	0.0	0.0	1.0	0.0	0.0	0.0	0.0	1.0
MOB4	25843	symbol	H. sapiens	25843	H. sapiens	MOB4	MOB family member 4, phocein			Predicted intracellular proteins					0.0	0.0	0.0	0.0	0.0	0.0	0.0	0.0	0.0	0.0	0.0	0.0	0.0	0.0	0.0	0.0	0.0	0.0	0.0	0.0
MOGS	7841	symbol	H. sapiens	7841	H. sapiens	MOGS	mannosyl-oligosaccharide glucosidase	GO:0019082 viral protein processing;GO:0009311 oligosaccharide metabolic process;GO:0006487 protein N-linked glycosylation		Predicted intracellular proteins; ENZYME proteins:Hydrolases; Enzymes; Disease related genes; Potential drug targets	Endoplasmic reticulum (Supported)				0.0	0.0	0.0	0.0	0.0	0.0	0.0	0.0	0.0	0.0	0.0	0.0	0.0	0.0	0.0	0.0	0.0	0.0	0.0	0.0
MOV10	4343	symbol	H. sapiens	4343	H. sapiens	MOV10	Mov10 RISC complex RNA helicase	GO:0010525 regulation of transposition, RNA-mediated;GO:0010526 negative regulation of transposition, RNA-mediated;GO:0032197 transposition, RNA-mediated		Predicted intracellular proteins; ENZYME proteins:Hydrolases; Enzymes	Cytosol (Approved)			(M5911)HALLMARK INTERFERON ALPHA RESPONSE	1.0	0.0	1.0	0.0	0.0	0.0	0.0	0.0	0.0	0.0	1.0	0.0	0.0	0.0	0.0	0.0	0.0	0.0	0.0	1.0
MPP4	58538	symbol	H. sapiens	58538	H. sapiens	MPP4	membrane palmitoylated protein 4	GO:0035418 protein localization to synapse;GO:1902414 protein localization to cell junction;GO:0008104 protein localization		Predicted intracellular proteins	Cytosol (Supported); Additional: Actin filaments				0.0	0.0	0.0	0.0	0.0	0.0	0.0	0.0	0.0	0.0	0.0	0.0	0.0	0.0	0.0	0.0	0.0	0.0	0.0	0.0
MRPL14	64928	symbol	H. sapiens	64928	H. sapiens	MRPL14	mitochondrial ribosomal protein L14	GO:0006412 translation;GO:0043043 peptide biosynthetic process;GO:0043604 amide biosynthetic process		Predicted intracellular proteins; Ribosomal proteins	Mitochondria (Supported)				0.0	0.0	0.0	0.0	0.0	0.0	0.0	0.0	0.0	0.0	0.0	0.0	0.0	0.0	0.0	0.0	0.0	0.0	0.0	0.0
MRPL2	51069	symbol	H. sapiens	51069	H. sapiens	MRPL2	mitochondrial ribosomal protein L2	GO:0032543 mitochondrial translation;GO:0140053 mitochondrial gene expression;GO:0006412 translation		Predicted intracellular proteins; Ribosomal proteins	Mitochondria (Supported); Additional: Nucleoplasm				0.0	0.0	0.0	0.0	0.0	0.0	0.0	0.0	0.0	0.0	0.0	0.0	0.0	0.0	0.0	0.0	0.0	0.0	0.0	0.0
MRPS18C	51023	symbol	H. sapiens	51023	H. sapiens	MRPS18C	mitochondrial ribosomal protein S18C	GO:0006412 translation;GO:0043043 peptide biosynthetic process;GO:0043604 amide biosynthetic process		Predicted intracellular proteins; Ribosomal proteins					0.0	0.0	0.0	0.0	0.0	0.0	0.0	0.0	0.0	0.0	0.0	0.0	0.0	0.0	0.0	0.0	0.0	0.0	0.0	0.0
MRPS24	64951	symbol	H. sapiens	64951	H. sapiens	MRPS24	mitochondrial ribosomal protein S24	GO:0032543 mitochondrial translation;GO:0140053 mitochondrial gene expression;GO:0006412 translation		Predicted intracellular proteins; Ribosomal proteins					0.0	0.0	0.0	0.0	0.0	0.0	0.0	0.0	0.0	0.0	0.0	0.0	0.0	0.0	0.0	0.0	0.0	0.0	0.0	0.0
MSX2	4488	symbol	H. sapiens	4488	H. sapiens	MSX2	msh homeobox 2	GO:0060363 cranial suture morphogenesis;GO:0097094 craniofacial suture morphogenesis;GO:2000678 negative regulation of transcription regulatory region DNA binding		Predicted intracellular proteins; Disease related genes; Transcription factors:Helix-turn-helix domains	Nuclear speckles (Supported)				0.0	0.0	0.0	0.0	1.0	1.0	0.0	0.0	1.0	0.0	0.0	1.0	1.0	0.0	1.0	0.0	0.0	0.0	0.0	1.0
MT1E	4493	symbol	H. sapiens	4493	H. sapiens	MT1E	metallothionein 1E	GO:0010273 detoxification of copper ion;GO:1990169 stress response to copper ion;GO:0061687 detoxification of inorganic compound		Predicted intracellular proteins	Nucleoplasm (Approved)			(M5942)HALLMARK UV RESPONSE DN; (M5891)HALLMARK HYPOXIA	1.0	0.0	0.0	0.0	0.0	0.0	0.0	0.0	0.0	0.0	0.0	0.0	0.0	0.0	0.0	0.0	0.0	0.0	0.0	0.0
MT1F	4494	symbol	H. sapiens	4494	H. sapiens	MT1F	metallothionein 1F	GO:0010273 detoxification of copper ion;GO:1990169 stress response to copper ion;GO:0061687 detoxification of inorganic compound		Predicted intracellular proteins					1.0	0.0	0.0	0.0	0.0	0.0	0.0	0.0	0.0	0.0	0.0	0.0	0.0	0.0	0.0	0.0	0.0	0.0	0.0	0.0
MTFP1	51537	symbol	H. sapiens	51537	H. sapiens	MTFP1	mitochondrial fission process 1	GO:0014850 response to muscle activity;GO:0000266 mitochondrial fission;GO:0014823 response to activity		Predicted intracellular proteins	Mitochondria (Approved)				0.0	0.0	0.0	0.0	0.0	0.0	0.0	0.0	0.0	0.0	0.0	0.0	0.0	0.0	0.0	0.0	0.0	0.0	0.0	0.0
MVD	4597	symbol	H. sapiens	4597	H. sapiens	MVD	mevalonate diphosphate decarboxylase	GO:0019287 isopentenyl diphosphate biosynthetic process, mevalonate pathway;GO:0009240 isopentenyl diphosphate biosynthetic process;GO:0046490 isopentenyl diphosphate metabolic process		ENZYME proteins:Lyases; Predicted intracellular proteins; Enzymes; Disease related genes; Potential drug targets	Cytosol (Approved); Additional: Cell Junctions			(M5892)HALLMARK CHOLESTEROL HOMEOSTASIS; (M5915)HALLMARK APICAL JUNCTION	0.0	0.0	0.0	0.0	0.0	0.0	0.0	0.0	0.0	0.0	0.0	0.0	0.0	0.0	0.0	0.0	0.0	0.0	0.0	0.0
MYB	4602	symbol	H. sapiens	4602	H. sapiens	MYB	MYB proto-oncogene, transcription factor	GO:1904897 regulation of hepatic stellate cell proliferation;GO:1904899 positive regulation of hepatic stellate cell proliferation;GO:1990922 hepatic stellate cell proliferation		Cancer-related genes:Mutated cancer genes; Cancer-related genes:Mutational cancer driver genes; Predicted intracellular proteins; Transcription factors:Helix-turn-helix domains	Nucleoplasm (Supported); Additional: Cytosol		(M143)PID IL2 PI3K PATHWAY; (M288)PID HES HEY PATHWAY; (M28)PID IL4 2PATHWAY	(M5906)HALLMARK ESTROGEN RESPONSE EARLY; (M5907)HALLMARK ESTROGEN RESPONSE LATE	1.0	0.0	1.0	1.0	0.0	1.0	0.0	0.0	0.0	0.0	1.0	0.0	1.0	0.0	0.0	0.0	1.0	0.0	0.0	0.0
MYCT1	80177	symbol	H. sapiens	80177	H. sapiens	MYCT1	MYC target 1	GO:0061484 hematopoietic stem cell homeostasis;GO:0048872 homeostasis of number of cells;GO:0042592 homeostatic process		Predicted intracellular proteins	Nucleoplasm (Approved); Additional: Vesicles		(M66)PID MYC ACTIV PATHWAY		0.0	0.0	0.0	0.0	0.0	0.0	0.0	0.0	0.0	0.0	0.0	0.0	0.0	0.0	0.0	0.0	0.0	0.0	0.0	0.0
MYH11	4629	symbol	H. sapiens	4629	H. sapiens	MYH11	myosin heavy chain 11	GO:0030241 skeletal muscle myosin thick filament assembly;GO:0071688 striated muscle myosin thick filament assembly;GO:0031034 myosin filament assembly		Candidate cardiovascular disease genes; Disease related genes; Cancer-related genes; Predicted intracellular proteins	Cytosol;Plasma membrane (Enhanced)	Tetrafluoroaluminate Ion		(M5909)HALLMARK MYOGENESIS	1.0	0.0	0.0	0.0	0.0	0.0	0.0	1.0	1.0	0.0	1.0	0.0	0.0	0.0	0.0	0.0	0.0	0.0	0.0	0.0
MYO3A	53904	symbol	H. sapiens	53904	H. sapiens	MYO3A	myosin IIIA	GO:0090103 cochlea morphogenesis;GO:0090102 cochlea development;GO:0042472 inner ear morphogenesis	STE Ser/Thr protein kinase family	ENZYME proteins:Transferases; Predicted intracellular proteins; Enzymes; Disease related genes; Kinases:STE Ser/Thr protein kinases; Potential drug targets	Actin filaments;Cytoplasmic bodies (Supported); Additional: Plasma membrane	Fostamatinib			0.0	0.0	0.0	0.0	1.0	0.0	1.0	0.0	0.0	0.0	0.0	0.0	0.0	0.0	0.0	0.0	0.0	0.0	0.0	0.0
MYOCD	93649	symbol	H. sapiens	93649	H. sapiens	MYOCD	myocardin	GO:2000721 positive regulation of transcription from RNA polymerase II promoter involved in smooth muscle cell differentiation;GO:0001560 regulation of cell growth by extracellular stimulus;GO:2000724 positive regulation of cardiac vascular smooth muscle cell differentiation		Cancer-related genes:Candidate cancer biomarkers; Predicted intracellular proteins; Cancer-related genes:Mutated cancer genes	Nucleoplasm (Approved)		(M186)PID PDGFRB PATHWAY		0.0	0.0	1.0	1.0	0.0	0.0	0.0	0.0	1.0	0.0	0.0	0.0	0.0	1.0	0.0	0.0	1.0	1.0	0.0	0.0
MYPN	84665	symbol	H. sapiens	84665	H. sapiens	MYPN	myopalladin	GO:0070593 dendrite self-avoidance;GO:0045214 sarcomere organization;GO:0008038 neuron recognition		Predicted intracellular proteins; Disease related genes	Nucleoplasm;Vesicles (Approved); Additional: Cytosol				0.0	0.0	0.0	0.0	0.0	0.0	0.0	0.0	1.0	0.0	1.0	0.0	0.0	0.0	0.0	0.0	0.0	0.0	0.0	0.0
MYRIP	25924	symbol	H. sapiens	25924	H. sapiens	MYRIP	myosin VIIA and Rab interacting protein	GO:0032024 positive regulation of insulin secretion;GO:0090277 positive regulation of peptide hormone secretion;GO:0002793 positive regulation of peptide secretion		Predicted intracellular proteins	Golgi apparatus;Nucleoli fibrillar center;Nucleoplasm (Approved)				0.0	0.0	0.0	0.0	0.0	0.0	0.0	0.0	0.0	0.0	0.0	0.0	0.0	0.0	0.0	0.0	0.0	0.0	0.0	0.0
MZF1	7593	symbol	H. sapiens	7593	H. sapiens	MZF1	myeloid zinc finger 1	GO:0000122 negative regulation of transcription by RNA polymerase II;GO:0045944 positive regulation of transcription by RNA polymerase II;GO:0045892 negative regulation of transcription, DNA-templated		Transcription factors:Zinc-coordinating DNA-binding domains; Predicted intracellular proteins	Nucleoplasm (Supported)				0.0	0.0	0.0	0.0	0.0	0.0	0.0	0.0	0.0	0.0	0.0	0.0	0.0	0.0	0.0	0.0	0.0	0.0	0.0	0.0
NABP2	79035	symbol	H. sapiens	79035	H. sapiens	NABP2	nucleic acid binding protein 2	GO:0070200 establishment of protein localization to telomere;GO:1904355 positive regulation of telomere capping;GO:0070199 establishment of protein localization to chromosome		Predicted intracellular proteins	Nucleoplasm (Enhanced)				1.0	0.0	0.0	0.0	0.0	0.0	0.0	0.0	0.0	0.0	0.0	0.0	0.0	0.0	0.0	0.0	0.0	0.0	0.0	0.0
NACC2	138151	symbol	H. sapiens	138151	H. sapiens	NACC2	NACC family member 2	GO:1900477 negative regulation of G1/S transition of mitotic cell cycle by negative regulation of transcription from RNA polymerase II promoter;GO:1902231 positive regulation of intrinsic apoptotic signaling pathway in response to DNA damage;GO:0034629 cellular protein-containing complex localization		Predicted intracellular proteins	Mitochondria;Nucleoli (Approved)				0.0	0.0	0.0	0.0	0.0	0.0	0.0	0.0	0.0	0.0	0.0	0.0	0.0	0.0	0.0	0.0	0.0	0.0	0.0	0.0
NAT14	57106	symbol	H. sapiens	57106	H. sapiens	NAT14	N-acetyltransferase 14 (putative)	GO:0006352 DNA-templated transcription, initiation;GO:0045893 positive regulation of transcription, DNA-templated;GO:1903508 positive regulation of nucleic acid-templated transcription		Predicted intracellular proteins	Mitochondria (Approved)				1.0	0.0	0.0	0.0	0.0	0.0	0.0	0.0	0.0	0.0	0.0	0.0	0.0	0.0	0.0	0.0	0.0	0.0	0.0	0.0
NBL1	4681	symbol	H. sapiens	4681	H. sapiens	NBL1	NBL1, DAN family BMP antagonist	GO:0038098 sequestering of BMP from receptor via BMP binding;GO:0035582 sequestering of BMP in extracellular matrix;GO:0090027 negative regulation of monocyte chemotaxis		Predicted intracellular proteins; Predicted secreted proteins				(M5906)HALLMARK ESTROGEN RESPONSE EARLY; (M5907)HALLMARK ESTROGEN RESPONSE LATE	0.0	0.0	0.0	0.0	0.0	0.0	0.0	0.0	0.0	0.0	1.0	0.0	0.0	0.0	0.0	0.0	0.0	0.0	0.0	0.0
NCDN	23154	symbol	H. sapiens	23154	H. sapiens	NCDN	neurochondrin	GO:0048168 regulation of neuronal synaptic plasticity;GO:0045453 bone resorption;GO:0046849 bone remodeling		Predicted intracellular proteins	Cytosol (Supported)				0.0	0.0	0.0	0.0	0.0	0.0	0.0	0.0	0.0	0.0	0.0	0.0	0.0	0.0	0.0	0.0	0.0	0.0	0.0	0.0
NDUFA2	4695	symbol	H. sapiens	4695	H. sapiens	NDUFA2	NADH:ubiquinone oxidoreductase subunit A2	GO:0001835 blastocyst hatching;GO:0035188 hatching;GO:0071684 organism emergence from protective structure		Predicted intracellular proteins		NADH		(M5936)HALLMARK OXIDATIVE PHOSPHORYLATION	0.0	0.0	1.0	0.0	1.0	0.0	0.0	0.0	0.0	0.0	0.0	0.0	0.0	0.0	0.0	0.0	0.0	0.0	0.0	0.0
NDUFA6	4700	symbol	H. sapiens	4700	H. sapiens	NDUFA6	NADH:ubiquinone oxidoreductase subunit A6	GO:0006120 mitochondrial electron transport, NADH to ubiquinone;GO:0010257 NADH dehydrogenase complex assembly;GO:0032981 mitochondrial respiratory chain complex I assembly		Predicted intracellular proteins		NADH		(M5938)HALLMARK REACTIVE OXYGEN SPECIES PATHWAY; (M5936)HALLMARK OXIDATIVE PHOSPHORYLATION	0.0	0.0	0.0	0.0	0.0	0.0	0.0	0.0	0.0	0.0	0.0	0.0	0.0	0.0	0.0	0.0	0.0	0.0	0.0	0.0
NDUFB11	54539	symbol	H. sapiens	54539	H. sapiens	NDUFB11	NADH:ubiquinone oxidoreductase subunit B11	GO:0010257 NADH dehydrogenase complex assembly;GO:0032981 mitochondrial respiratory chain complex I assembly;GO:0033108 mitochondrial respiratory chain complex assembly		Disease related genes	Mitochondria (Approved)				0.0	0.0	0.0	0.0	0.0	0.0	0.0	0.0	0.0	0.0	0.0	0.0	0.0	0.0	0.0	0.0	0.0	0.0	0.0	0.0
NDUFB8	4714	symbol	H. sapiens	4714	H. sapiens	NDUFB8	NADH:ubiquinone oxidoreductase subunit B8	GO:0006120 mitochondrial electron transport, NADH to ubiquinone;GO:0010257 NADH dehydrogenase complex assembly;GO:0032981 mitochondrial respiratory chain complex I assembly			Mitochondria (Enhanced)	NADH		(M5936)HALLMARK OXIDATIVE PHOSPHORYLATION	0.0	0.0	0.0	0.0	0.0	0.0	0.0	0.0	0.0	0.0	0.0	0.0	0.0	0.0	0.0	0.0	0.0	0.0	0.0	0.0
NDUFB9	4715	symbol	H. sapiens	4715	H. sapiens	NDUFB9	NADH:ubiquinone oxidoreductase subunit B9	GO:0006120 mitochondrial electron transport, NADH to ubiquinone;GO:0010257 NADH dehydrogenase complex assembly;GO:0032981 mitochondrial respiratory chain complex I assembly		Predicted intracellular proteins	Mitochondria (Supported)	NADH			0.0	0.0	0.0	0.0	0.0	0.0	0.0	0.0	0.0	0.0	0.0	0.0	0.0	0.0	0.0	0.0	0.0	0.0	0.0	0.0
NEFH	4744	symbol	H. sapiens	4744	H. sapiens	NEFH	neurofilament heavy chain	GO:0048936 peripheral nervous system neuron axonogenesis;GO:0033693 neurofilament bundle assembly;GO:0099185 postsynaptic intermediate filament cytoskeleton organization		Predicted intracellular proteins; Disease related genes				(M5951)HALLMARK SPERMATOGENESIS; (M5902)HALLMARK APOPTOSIS	0.0	0.0	0.0	0.0	0.0	0.0	0.0	0.0	0.0	0.0	1.0	0.0	0.0	0.0	0.0	0.0	0.0	0.0	0.0	0.0
NEFL	4747	symbol	H. sapiens	4747	H. sapiens	NEFL	neurofilament light chain	GO:0045105 intermediate filament polymerization or depolymerization;GO:1903937 response to acrylamide;GO:0033693 neurofilament bundle assembly		Predicted intracellular proteins; Disease related genes	Intermediate filaments;Nucleoplasm (Approved); Additional: Midbody				0.0	0.0	0.0	0.0	0.0	0.0	0.0	0.0	0.0	1.0	1.0	0.0	0.0	0.0	0.0	0.0	0.0	0.0	0.0	1.0
NEFM	4741	symbol	H. sapiens	4741	H. sapiens	NEFM	neurofilament medium chain	GO:0033693 neurofilament bundle assembly;GO:0045110 intermediate filament bundle assembly;GO:0045109 intermediate filament organization		Predicted intracellular proteins	Intermediate filaments (Enhanced)				0.0	0.0	0.0	0.0	0.0	0.0	0.0	0.0	0.0	0.0	0.0	0.0	0.0	0.0	0.0	0.0	0.0	0.0	0.0	0.0
NES	10763	symbol	H. sapiens	10763	H. sapiens	NES	nestin	GO:0030842 regulation of intermediate filament depolymerization;GO:0030844 positive regulation of intermediate filament depolymerization;GO:0045106 intermediate filament depolymerization		Predicted intracellular proteins	Intermediate filaments (Enhanced)				0.0	0.0	0.0	0.0	1.0	0.0	1.0	0.0	0.0	1.0	1.0	0.0	0.0	0.0	0.0	0.0	0.0	0.0	0.0	0.0
NETO2	81831	symbol	H. sapiens	81831	H. sapiens	NETO2	neuropilin and tolloid like 2	GO:2000312 regulation of kainate selective glutamate receptor activity;GO:2000649 regulation of sodium ion transmembrane transporter activity;GO:0099601 regulation of neurotransmitter receptor activity		Transporters:Accessory Factors Involved in Transport	Golgi apparatus (Approved)				0.0	0.0	0.0	0.0	0.0	0.0	0.0	0.0	0.0	0.0	0.0	0.0	0.0	0.0	0.0	0.0	0.0	0.0	0.0	0.0
NEURL1	9148	symbol	H. sapiens	9148	H. sapiens	NEURL1	neuralized E3 ubiquitin protein ligase 1	GO:0048170 positive regulation of long-term neuronal synaptic plasticity;GO:0090129 positive regulation of synapse maturation;GO:0045741 positive regulation of epidermal growth factor-activated receptor activity		ENZYME proteins:Transferases; Predicted intracellular proteins; Enzymes			(M17)PID NOTCH PATHWAY		1.0	0.0	0.0	0.0	0.0	0.0	0.0	0.0	1.0	1.0	1.0	0.0	0.0	0.0	0.0	0.0	1.0	0.0	0.0	1.0
NEURL4	84461	symbol	H. sapiens	84461	H. sapiens	NEURL4	neuralized E3 ubiquitin protein ligase 4	GO:0016567 protein ubiquitination;GO:0032446 protein modification by small protein conjugation;GO:0070647 protein modification by small protein conjugation or removal		Predicted intracellular proteins					0.0	0.0	0.0	0.0	0.0	0.0	0.0	0.0	0.0	0.0	0.0	0.0	0.0	0.0	0.0	0.0	0.0	0.0	0.0	0.0
NEXN-AS1	374987	symbol	H. sapiens	374987	H. sapiens	NEXN-AS1	NEXN antisense RNA 1								0.0	0.0	0.0	0.0	0.0	0.0	0.0	0.0	0.0	0.0	0.0	0.0	0.0	0.0	0.0	0.0	0.0	0.0	0.0	0.0
NFE2	4778	symbol	H. sapiens	4778	H. sapiens	NFE2	nuclear factor, erythroid 2	GO:0006337 nucleosome disassembly;GO:0031498 chromatin disassembly;GO:0032986 protein-DNA complex disassembly		Predicted intracellular proteins; Transcription factors:Basic domains	Actin filaments;Nucleoplasm (Approved)			(M5945)HALLMARK HEME METABOLISM	1.0	0.0	1.0	0.0	0.0	0.0	0.0	0.0	0.0	0.0	0.0	0.0	0.0	0.0	0.0	0.0	0.0	0.0	0.0	0.0
NFKB2	4791	symbol	H. sapiens	4791	H. sapiens	NFKB2	nuclear factor kappa B subunit 2	GO:0002268 follicular dendritic cell differentiation;GO:0002266 follicular dendritic cell activation;GO:0002467 germinal center formation		Cancer-related genes:Candidate cancer biomarkers; Predicted intracellular proteins; Transcription factors:Immunoglobulin fold; Disease related genes	Cytosol (Approved); Additional: Nucleoplasm	Donepezil; Glucosamine; HE3286; P54; NOX-700; SGN-30; Custirsen; NF-kappaB Decoy; Andrographolide; Glycyrrhizic acid; Fish oil; SC-236	(M7416)ST GAQ PATHWAY; (M18030)ST TUMOR NECROSIS FACTOR PATHWAY; (M12705)SIG CD40PATHWAYMAP	(M5890)HALLMARK TNFA SIGNALING VIA NFKB	1.0	0.0	1.0	0.0	0.0	1.0	0.0	0.0	0.0	0.0	0.0	0.0	1.0	0.0	0.0	0.0	0.0	0.0	1.0	1.0
NGF	4803	symbol	H. sapiens	4803	H. sapiens	NGF	nerve growth factor	GO:0048672 positive regulation of collateral sprouting;GO:0038180 nerve growth factor signaling pathway;GO:0048670 regulation of collateral sprouting		Cancer-related genes:Candidate cancer biomarkers; RAS pathway related proteins; Candidate cardiovascular disease genes; Predicted secreted proteins; Disease related genes		Clenbuterol; RI 624; Polaprezinc	(M18895)SA TRKA RECEPTOR; (M271)PID PI3K PLC TRK PATHWAY; (M100)PID SHP2 PATHWAY	(M5923)HALLMARK PI3K AKT MTOR SIGNALING; (M5953)HALLMARK KRAS SIGNALING UP	0.0	0.0	0.0	0.0	0.0	0.0	0.0	0.0	0.0	0.0	1.0	0.0	0.0	0.0	0.0	0.0	1.0	0.0	0.0	0.0
NID2	22795	symbol	H. sapiens	22795	H. sapiens	NID2	nidogen 2	GO:0071711 basement membrane organization;GO:0007160 cell-matrix adhesion;GO:0030198 extracellular matrix organization		Predicted intracellular proteins; Predicted secreted proteins	Plasma membrane (Enhanced)		(M5887)NABA BASEMENT MEMBRANES; (M3008)NABA ECM GLYCOPROTEINS; (M5884)NABA CORE MATRISOME	(M5930)HALLMARK EPITHELIAL MESENCHYMAL TRANSITION	0.0	0.0	0.0	0.0	0.0	0.0	0.0	0.0	0.0	0.0	0.0	0.0	0.0	0.0	0.0	0.0	0.0	0.0	0.0	0.0
NIPAL4	348938	symbol	H. sapiens	348938	H. sapiens	NIPAL4	NIPA like domain containing 4	GO:1903830 magnesium ion transmembrane transport;GO:0015693 magnesium ion transport;GO:0098662 inorganic cation transmembrane transport		Transporters:Electrochemical Potential-driven transporters; Potential drug targets; Disease related genes					0.0	0.0	0.0	0.0	0.0	0.0	0.0	0.0	0.0	0.0	0.0	0.0	0.0	0.0	0.0	0.0	0.0	0.0	0.0	0.0
NKD2	85409	symbol	H. sapiens	85409	H. sapiens	NKD2	NKD inhibitor of WNT signaling pathway 2	GO:0048210 Golgi vesicle fusion to target membrane;GO:0010954 positive regulation of protein processing;GO:1903319 positive regulation of protein maturation		Predicted intracellular proteins			(M90)PID WNT CANONICAL PATHWAY; (M17761)ST WNT BETA CATENIN PATHWAY		0.0	0.0	0.0	0.0	0.0	0.0	0.0	0.0	0.0	0.0	0.0	0.0	0.0	0.0	0.0	1.0	0.0	0.0	0.0	0.0
NLRP10	338322	symbol	H. sapiens	338322	H. sapiens	NLRP10	NLR family pyrin domain containing 10	GO:0032730 positive regulation of interleukin-1 alpha production;GO:1900426 positive regulation of defense response to bacterium;GO:0032610 interleukin-1 alpha production		Predicted intracellular proteins	Nucleoplasm (Approved); Additional: Nuclear membrane				0.0	0.0	0.0	0.0	0.0	0.0	0.0	0.0	0.0	0.0	0.0	0.0	0.0	0.0	0.0	0.0	0.0	0.0	0.0	0.0
NME2	4831	symbol	H. sapiens	4831	H. sapiens	NME2	NME/NM23 nucleoside diphosphate kinase 2	GO:0018106 peptidyl-histidine phosphorylation;GO:0006228 UTP biosynthetic process;GO:0006183 GTP biosynthetic process		Cancer-related genes:Candidate cancer biomarkers; Predicted intracellular proteins; ENZYME proteins:Transferases; Enzymes	Cytosol (Supported); Additional: Midbody ring;Plasma membrane		(M66)PID MYC ACTIV PATHWAY		1.0	0.0	0.0	1.0	0.0	0.0	0.0	0.0	0.0	0.0	1.0	0.0	0.0	0.0	0.0	0.0	0.0	0.0	0.0	0.0
NNAT	4826	symbol	H. sapiens	4826	H. sapiens	NNAT	neuronatin	GO:0009249 protein lipoylation;GO:0032024 positive regulation of insulin secretion;GO:0090277 positive regulation of peptide hormone secretion							0.0	0.0	0.0	0.0	0.0	0.0	0.0	0.0	0.0	1.0	0.0	0.0	0.0	0.0	0.0	0.0	0.0	0.0	0.0	0.0
NOCT	25819	symbol	H. sapiens	25819	H. sapiens	NOCT	nocturnin	GO:0000290 deadenylation-dependent decapping of nuclear-transcribed mRNA;GO:0110156 methylguanosine-cap decapping;GO:0110154 RNA decapping		Predicted intracellular proteins; ENZYME proteins:Hydrolases; Enzymes	Nuclear bodies (Supported); Additional: Cytosol;Nucleoplasm			(M5891)HALLMARK HYPOXIA	0.0	0.0	0.0	1.0	0.0	0.0	0.0	0.0	0.0	0.0	0.0	0.0	0.0	0.0	1.0	0.0	0.0	0.0	0.0	0.0
NOD1	10392	symbol	H. sapiens	10392	H. sapiens	NOD1	nucleotide binding oligomerization domain containing 1	GO:0002606 positive regulation of dendritic cell antigen processing and presentation;GO:1904415 regulation of xenophagy;GO:1904417 positive regulation of xenophagy		Predicted intracellular proteins	Mitochondria (Approved)			(M5923)HALLMARK PI3K AKT MTOR SIGNALING; (M5913)HALLMARK INTERFERON GAMMA RESPONSE	0.0	1.0	1.0	0.0	0.0	0.0	0.0	0.0	0.0	0.0	0.0	0.0	0.0	0.0	0.0	0.0	0.0	0.0	0.0	1.0
NOS1	4842	symbol	H. sapiens	4842	H. sapiens	NOS1	nitric oxide synthase 1	GO:0098923 retrograde trans-synaptic signaling by soluble gas;GO:0098924 retrograde trans-synaptic signaling by nitric oxide;GO:0051581 negative regulation of neurotransmitter uptake		Cancer-related genes:Candidate cancer biomarkers; Predicted intracellular proteins; FDA approved drug targets:Small molecule drugs; Enzymes; ENZYME proteins:Oxidoreductases	Plasma membrane (Supported); Additional: Nucleoplasm	Citrulline; Donepezil; Ketamine; L-N(omega)-Nitroarginine-2,4-L-diaminobutyric amide; Formic acid; 3-Bromo-7-Nitroindazole; N-{(4S)-4-Amino-5-[(2-aminoethyl)amino]pentyl}-N'-nitroguanidine; N-[3-(aminomethyl)benzyl]acetamidine; L-N(omega)-nitroarginine-(4R)-amino-L-proline amide; 1-hydroxy-2-isopropylguanidine; N-omega-propyl-L-arginine; 2-butyl-1-hydroxyguanidine; S-Ethyl-N-[4-(Trifluoromethyl)P…		(M5951)HALLMARK SPERMATOGENESIS; (M5909)HALLMARK MYOGENESIS; (M5956)HALLMARK KRAS SIGNALING DN	0.0	0.0	1.0	0.0	0.0	0.0	0.0	0.0	1.0	0.0	0.0	0.0	0.0	0.0	0.0	1.0	0.0	0.0	0.0	0.0
NOTCH1	4851	symbol	H. sapiens	4851	H. sapiens	NOTCH1	notch receptor 1	GO:0003178 coronary sinus valve development;GO:0003182 coronary sinus valve morphogenesis;GO:0003270 Notch signaling pathway involved in regulation of secondary heart field cardioblast proliferation		Cancer-related genes:Candidate cancer biomarkers; Transporters; Cancer-related genes:Mutated cancer genes; Disease related genes; Cancer-related genes:Mutational cancer driver genes; Potential drug targets	Nucleoplasm (Approved)		(M70)PID PS1 PATHWAY; (M236)PID DELTA NP63 PATHWAY; (M288)PID HES HEY PATHWAY	(M5903)HALLMARK NOTCH SIGNALING; (M5895)HALLMARK WNT BETA CATENIN SIGNALING; (M5909)HALLMARK MYOGENESIS	1.0	0.0	0.0	1.0	1.0	0.0	1.0	0.0	1.0	1.0	1.0	1.0	1.0	1.0	1.0	0.0	0.0	1.0	1.0	1.0
NPAP1	23742	symbol	H. sapiens	23742	H. sapiens	NPAP1	nuclear pore associated protein 1	GO:0006405 RNA export from nucleus;GO:0006606 protein import into nucleus;GO:0051168 nuclear export		Transporters:Transporter channels and pores; Predicted intracellular proteins					0.0	0.0	0.0	0.0	0.0	0.0	0.0	0.0	0.0	0.0	0.0	0.0	0.0	0.0	0.0	0.0	0.0	0.0	0.0	0.0
NPM3	10360	symbol	H. sapiens	10360	H. sapiens	NPM3	nucleophosmin/nucleoplasmin 3	GO:0009303 rRNA transcription;GO:0098781 ncRNA transcription;GO:0006338 chromatin remodeling		Predicted intracellular proteins	Actin filaments;Cytosol;Nucleoli (Approved)				0.0	0.0	0.0	0.0	0.0	0.0	0.0	0.0	0.0	0.0	0.0	0.0	0.0	0.0	0.0	0.0	0.0	0.0	0.0	0.0
NPRL2	10641	symbol	H. sapiens	10641	H. sapiens	NPRL2	NPR2 like, GATOR1 complex subunit	GO:0006995 cellular response to nitrogen starvation;GO:0043562 cellular response to nitrogen levels;GO:2000785 regulation of autophagosome assembly		Predicted intracellular proteins; Disease related genes					1.0	0.0	0.0	0.0	0.0	0.0	0.0	1.0	0.0	0.0	0.0	0.0	0.0	0.0	0.0	1.0	0.0	0.0	0.0	0.0
NR2F6	2063	symbol	H. sapiens	2063	H. sapiens	NR2F6	nuclear receptor subfamily 2 group F member 6	GO:0050965 detection of temperature stimulus involved in sensory perception of pain;GO:0050961 detection of temperature stimulus involved in sensory perception;GO:0016048 detection of temperature stimulus		Transcription factors:Zinc-coordinating DNA-binding domains; Nuclear receptors; Predicted intracellular proteins	Nuclear speckles (Supported); Additional: Cytosol				0.0	0.0	0.0	0.0	0.0	0.0	0.0	0.0	0.0	0.0	0.0	0.0	0.0	0.0	0.0	0.0	0.0	0.0	0.0	0.0
NRK	203447	symbol	H. sapiens	203447	H. sapiens	NRK	Nik related kinase	GO:0031532 actin cytoskeleton reorganization;GO:0032147 activation of protein kinase activity;GO:0045860 positive regulation of protein kinase activity	STE Ser/Thr protein kinase family	ENZYME proteins:Transferases; Predicted intracellular proteins; Kinases:STE Ser/Thr protein kinases; Enzymes	Cytosol;Nucleoplasm (Approved)		(M128)PID TNF PATHWAY		0.0	0.0	0.0	0.0	0.0	0.0	0.0	0.0	0.0	0.0	1.0	0.0	0.0	0.0	0.0	0.0	0.0	0.0	0.0	0.0
NRXN2	9379	symbol	H. sapiens	9379	H. sapiens	NRXN2	neurexin 2	GO:0097118 neuroligin clustering involved in postsynaptic membrane assembly;GO:0097116 gephyrin clustering involved in postsynaptic density assembly;GO:0042297 vocal learning		Predicted intracellular proteins				(M5915)HALLMARK APICAL JUNCTION	0.0	0.0	0.0	0.0	0.0	0.0	0.0	0.0	0.0	0.0	0.0	0.0	0.0	0.0	0.0	0.0	0.0	0.0	0.0	0.0
NRXN3	9369	symbol	H. sapiens	9369	H. sapiens	NRXN3	neurexin 3	GO:0007158 neuron cell-cell adhesion;GO:0071625 vocalization behavior;GO:0035176 social behavior		Predicted intracellular proteins					0.0	0.0	0.0	0.0	0.0	0.0	0.0	0.0	0.0	0.0	1.0	0.0	0.0	0.0	0.0	0.0	0.0	0.0	0.0	0.0
NSUN5P1	155400	symbol	H. sapiens	155400	H. sapiens	NSUN5P1	NSUN5 pseudogene 1	GO:0070475 rRNA base methylation;GO:0031167 rRNA methylation;GO:0000154 rRNA modification							0.0	0.0	0.0	0.0	0.0	0.0	0.0	0.0	0.0	0.0	0.0	0.0	0.0	0.0	0.0	0.0	0.0	0.0	0.0	0.0
NSUN5P2	260294	symbol	H. sapiens	260294	H. sapiens	NSUN5P2	NSUN5 pseudogene 2	GO:0070475 rRNA base methylation;GO:0031167 rRNA methylation;GO:0000154 rRNA modification							0.0	0.0	0.0	0.0	0.0	0.0	0.0	0.0	0.0	0.0	0.0	0.0	0.0	0.0	0.0	0.0	0.0	0.0	0.0	0.0
NT5C	30833	symbol	H. sapiens	30833	H. sapiens	NT5C	5', 3'-nucleotidase, cytosolic	GO:0046074 dTMP catabolic process;GO:0046073 dTMP metabolic process;GO:0009175 pyrimidine ribonucleoside monophosphate catabolic process		Predicted intracellular proteins	Cytosol (Supported)			(M5898)HALLMARK DNA REPAIR	0.0	0.0	0.0	0.0	0.0	0.0	0.0	0.0	0.0	0.0	0.0	0.0	0.0	0.0	0.0	0.0	0.0	0.0	0.0	0.0
NT5DC2	64943	symbol	H. sapiens	64943	H. sapiens	NT5DC2	5'-nucleotidase domain containing 2	GO:0016311 dephosphorylation;GO:0006796 phosphate-containing compound metabolic process;GO:0006793 phosphorus metabolic process		Predicted intracellular proteins					0.0	0.0	0.0	0.0	0.0	0.0	0.0	0.0	0.0	0.0	0.0	0.0	0.0	0.0	0.0	0.0	0.0	0.0	0.0	0.0
NTN4	59277	symbol	H. sapiens	59277	H. sapiens	NTN4	netrin 4	GO:0060668 regulation of branching involved in salivary gland morphogenesis by extracellular matrix-epithelial cell signaling;GO:0035426 extracellular matrix-cell signaling;GO:0060693 regulation of branching involved in salivary gland morphogenesis		Cancer-related genes:Mutated cancer genes; Predicted intracellular proteins; Predicted secreted proteins			(M5887)NABA BASEMENT MEMBRANES; (M3008)NABA ECM GLYCOPROTEINS; (M5884)NABA CORE MATRISOME		0.0	0.0	0.0	0.0	1.0	0.0	0.0	1.0	0.0	0.0	1.0	0.0	0.0	0.0	0.0	0.0	0.0	1.0	0.0	0.0
NTRK2	4915	symbol	H. sapiens	4915	H. sapiens	NTRK2	neurotrophic receptor tyrosine kinase 2	GO:0099540 trans-synaptic signaling by neuropeptide;GO:0099551 trans-synaptic signaling by neuropeptide, modulating synaptic transmission;GO:0099183 trans-synaptic signaling by BDNF, modulating synaptic transmission	Tyr protein kinase family	Cancer-related genes:Candidate cancer biomarkers; ENZYME proteins:Transferases; Kinases:Tyr protein kinases; RAS pathway related proteins; Enzymes; Disease related genes; Potential drug targets	Cytosol (Approved)	Amitriptyline; Esketamine; Entrectinib; Fostamatinib; Larotrectinib	(M142)PID AJDISS 2PATHWAY; (M100)PID SHP2 PATHWAY; (M187)PID TRKR PATHWAY		1.0	0.0	0.0	0.0	0.0	0.0	1.0	0.0	0.0	1.0	1.0	0.0	0.0	1.0	0.0	0.0	1.0	0.0	0.0	0.0
NUAK2	81788	symbol	H. sapiens	81788	H. sapiens	NUAK2	NUAK family kinase 2	GO:0042149 cellular response to glucose starvation;GO:0009267 cellular response to starvation;GO:0042594 response to starvation	CAMK Ser/Thr protein kinase family	ENZYME proteins:Transferases; Kinases:CAMK Ser/Thr protein kinases; Enzymes	Cytosol;Nucleoplasm (Approved)	Fostamatinib			0.0	0.0	0.0	0.0	0.0	0.0	0.0	0.0	0.0	0.0	0.0	0.0	0.0	0.0	0.0	0.0	0.0	0.0	0.0	0.0
NUDT10	170685	symbol	H. sapiens	170685	H. sapiens	NUDT10	nudix hydrolase 10	GO:0071543 diphosphoinositol polyphosphate metabolic process;GO:1901906 diadenosine pentaphosphate metabolic process;GO:1901907 diadenosine pentaphosphate catabolic process		Predicted intracellular proteins; ENZYME proteins:Hydrolases; Enzymes	Cytosol (Approved)				0.0	0.0	0.0	0.0	0.0	0.0	0.0	0.0	0.0	0.0	0.0	0.0	0.0	0.0	0.0	0.0	0.0	0.0	0.0	0.0
NUDT3	11165	symbol	H. sapiens	11165	H. sapiens	NUDT3	nudix hydrolase 3	GO:0071544 diphosphoinositol polyphosphate catabolic process;GO:0071543 diphosphoinositol polyphosphate metabolic process;GO:1901906 diadenosine pentaphosphate metabolic process		Predicted intracellular proteins; ENZYME proteins:Hydrolases; Enzymes	Cytosol (Approved)				0.0	0.0	0.0	0.0	0.0	0.0	0.0	0.0	0.0	0.0	0.0	0.0	0.0	0.0	0.0	0.0	0.0	0.0	0.0	0.0
NUTM2D	728130	symbol	H. sapiens	728130	H. sapiens	NUTM2D	NUT family member 2D			Predicted intracellular proteins	Nuclear bodies (Approved)				0.0	0.0	0.0	0.0	0.0	0.0	0.0	0.0	0.0	0.0	0.0	0.0	0.0	0.0	0.0	0.0	0.0	0.0	0.0	0.0
NXN	64359	symbol	H. sapiens	64359	H. sapiens	NXN	nucleoredoxin	GO:0031397 negative regulation of protein ubiquitination;GO:1903321 negative regulation of protein modification by small protein conjugation or removal;GO:0098869 cellular oxidant detoxification		Predicted intracellular proteins; Enzymes; ENZYME proteins:Oxidoreductases	Cytosol (Approved)				0.0	0.0	0.0	0.0	1.0	0.0	0.0	0.0	0.0	0.0	0.0	0.0	0.0	0.0	0.0	0.0	0.0	0.0	0.0	0.0
NXNL2	158046	symbol	H. sapiens	158046	H. sapiens	NXNL2	nucleoredoxin like 2	GO:0045494 photoreceptor cell maintenance;GO:0001895 retina homeostasis;GO:0001894 tissue homeostasis		Predicted intracellular proteins	Cytosol (Approved)				0.0	0.0	0.0	0.0	0.0	0.0	0.0	0.0	0.0	0.0	0.0	0.0	0.0	0.0	0.0	0.0	0.0	0.0	0.0	0.0
NXPH4	11247	symbol	H. sapiens	11247	H. sapiens	NXPH4	neurexophilin 4	GO:0007218 neuropeptide signaling pathway;GO:0007186 G protein-coupled receptor signaling pathway;GO:0007165 signal transduction		Predicted secreted proteins					0.0	0.0	0.0	0.0	0.0	0.0	0.0	0.0	0.0	0.0	0.0	0.0	0.0	0.0	0.0	0.0	0.0	0.0	0.0	0.0
OGFOD3	79701	symbol	H. sapiens	79701	H. sapiens	OGFOD3	2-oxoglutarate and iron dependent oxygenase domain containing 3			Predicted intracellular proteins	Nucleoplasm (Approved)				0.0	0.0	0.0	0.0	0.0	0.0	0.0	0.0	0.0	0.0	0.0	0.0	0.0	0.0	0.0	0.0	0.0	0.0	0.0	0.0
OLFM2	93145	symbol	H. sapiens	93145	H. sapiens	OLFM2	olfactomedin 2	GO:0090678 cell dedifferentiation involved in phenotypic switching;GO:1905174 regulation of vascular associated smooth muscle cell dedifferentiation;GO:1990936 vascular associated smooth muscle cell dedifferentiation		Predicted intracellular proteins; Predicted secreted proteins	Nucleoplasm (Approved)				0.0	0.0	0.0	0.0	0.0	0.0	0.0	0.0	1.0	0.0	0.0	0.0	0.0	0.0	0.0	0.0	0.0	0.0	0.0	0.0
OSBPL5	114879	symbol	H. sapiens	114879	H. sapiens	OSBPL5	oxysterol binding protein like 5	GO:0036150 phosphatidylserine acyl-chain remodeling;GO:0006658 phosphatidylserine metabolic process;GO:0120009 intermembrane lipid transfer		Predicted intracellular proteins; Transporters:Electrochemical Potential-driven transporters	Vesicles (Enhanced)				0.0	0.0	0.0	0.0	0.0	0.0	0.0	0.0	0.0	0.0	0.0	0.0	0.0	0.0	0.0	0.0	0.0	0.0	0.0	0.0
OSBPL7	114881	symbol	H. sapiens	114881	H. sapiens	OSBPL7	oxysterol binding protein like 7	GO:0071397 cellular response to cholesterol;GO:0036315 cellular response to sterol;GO:0070723 response to cholesterol		Predicted intracellular proteins	Cytosol;Nucleoplasm (Approved); Additional: Plasma membrane				0.0	0.0	0.0	0.0	0.0	0.0	0.0	0.0	0.0	0.0	0.0	0.0	0.0	0.0	0.0	0.0	0.0	0.0	0.0	0.0
OST4	100128731	symbol	H. sapiens	100128731	H. sapiens	OST4	oligosaccharyltransferase complex subunit 4, non-catalytic	GO:0018279 protein N-linked glycosylation via asparagine;GO:0018196 peptidyl-asparagine modification;GO:0006487 protein N-linked glycosylation							0.0	0.0	0.0	0.0	0.0	0.0	0.0	0.0	0.0	0.0	0.0	0.0	0.0	0.0	0.0	0.0	0.0	0.0	0.0	0.0
OXER1	165140	symbol	H. sapiens	165140	H. sapiens	OXER1	oxoeicosanoid receptor 1	GO:0007193 adenylate cyclase-inhibiting G protein-coupled receptor signaling pathway;GO:0007188 adenylate cyclase-modulating G protein-coupled receptor signaling pathway;GO:0007186 G protein-coupled receptor signaling pathway		G-protein coupled receptors:GPCRs excl olfactory receptors					0.0	0.0	0.0	0.0	0.0	0.0	0.0	0.0	0.0	0.0	0.0	0.0	0.0	0.0	0.0	0.0	0.0	0.0	0.0	0.0
P3H2	55214	symbol	H. sapiens	55214	H. sapiens	P3H2	prolyl 3-hydroxylase 2	GO:0019511 peptidyl-proline hydroxylation;GO:0018126 protein hydroxylation;GO:0018208 peptidyl-proline modification		Predicted intracellular proteins; Enzymes; ENZYME proteins:Oxidoreductases; Disease related genes; Potential drug targets	Golgi apparatus (Supported); Additional: Cytosol;Nucleoplasm;Vesicles	Ascorbic acid; Proline	(M3468)NABA ECM REGULATORS; (M5885)NABA MATRISOME ASSOCIATED; (M5889)NABA MATRISOME		0.0	0.0	0.0	0.0	0.0	0.0	0.0	0.0	0.0	0.0	0.0	0.0	0.0	0.0	0.0	0.0	0.0	0.0	0.0	0.0
P3H4	10609	symbol	H. sapiens	10609	H. sapiens	P3H4	prolyl 3-hydroxylase family member 4 (inactive)	GO:0017185 peptidyl-lysine hydroxylation;GO:0007130 synaptonemal complex assembly;GO:0070193 synaptonemal complex organization		Predicted intracellular proteins	Endoplasmic reticulum;Vesicles (Supported)				0.0	0.0	0.0	0.0	0.0	0.0	0.0	0.0	0.0	0.0	0.0	0.0	0.0	0.0	0.0	0.0	0.0	0.0	0.0	0.0
PACSIN3	29763	symbol	H. sapiens	29763	H. sapiens	PACSIN3	protein kinase C and casein kinase substrate in neurons 3	GO:0051044 positive regulation of membrane protein ectodomain proteolysis;GO:0097320 plasma membrane tubulation;GO:0051043 regulation of membrane protein ectodomain proteolysis		Predicted intracellular proteins	Cytosol (Supported); Additional: Plasma membrane				0.0	0.0	0.0	0.0	0.0	0.0	0.0	0.0	0.0	0.0	0.0	0.0	0.0	0.0	0.0	0.0	0.0	0.0	0.0	0.0
PADI2	11240	symbol	H. sapiens	11240	H. sapiens	PADI2	peptidyl arginine deiminase 2	GO:0010848 regulation of chromatin disassembly;GO:0036413 histone H3-R26 citrullination;GO:1901624 negative regulation of lymphocyte chemotaxis		Predicted intracellular proteins; ENZYME proteins:Hydrolases; Enzymes		Citrulline			1.0	1.0	0.0	0.0	0.0	0.0	0.0	0.0	0.0	1.0	1.0	0.0	0.0	0.0	0.0	0.0	0.0	0.0	0.0	0.0
PAM16	51025	symbol	H. sapiens	51025	H. sapiens	PAM16	presequence translocase associated motor 16	GO:1902511 negative regulation of apoptotic DNA fragmentation;GO:1903625 negative regulation of DNA catabolic process;GO:1902510 regulation of apoptotic DNA fragmentation		Predicted intracellular proteins; Disease related genes	Mitochondria;Nucleoplasm (Approved); Additional: Microtubules				0.0	0.0	0.0	0.0	0.0	0.0	0.0	0.0	0.0	0.0	0.0	0.0	0.0	0.0	1.0	0.0	0.0	0.0	0.0	0.0
PANK4	55229	symbol	H. sapiens	55229	H. sapiens	PANK4	pantothenate kinase 4 (inactive)	GO:0015937 coenzyme A biosynthetic process;GO:0015936 coenzyme A metabolic process;GO:0033866 nucleoside bisphosphate biosynthetic process		ENZYME proteins:Transferases; Predicted intracellular proteins; Enzymes	Cytosol (Approved)				0.0	0.0	0.0	0.0	0.0	0.0	0.0	0.0	0.0	0.0	0.0	0.0	0.0	0.0	0.0	0.0	0.0	0.0	0.0	0.0
PANO1	101927423	symbol	H. sapiens	101927423	H. sapiens	PANO1	proapoptotic nucleolar protein 1	GO:0032435 negative regulation of proteasomal ubiquitin-dependent protein catabolic process;GO:2000059 negative regulation of ubiquitin-dependent protein catabolic process;GO:1901799 negative regulation of proteasomal protein catabolic process							0.0	0.0	0.0	0.0	0.0	0.0	0.0	0.0	0.0	0.0	0.0	0.0	0.0	0.0	0.0	0.0	0.0	0.0	0.0	0.0
PARD6A	50855	symbol	H. sapiens	50855	H. sapiens	PARD6A	par-6 family cell polarity regulator alpha	GO:1904781 positive regulation of protein localization to centrosome;GO:1904779 regulation of protein localization to centrosome;GO:0045217 cell-cell junction maintenance		Predicted intracellular proteins	Actin filaments;Cell Junctions (Supported); Additional: Cytosol		(M193)PID NEPHRIN NEPH1 PATHWAY; (M16)PID INSULIN PATHWAY; (M12)PID RHOA PATHWAY		1.0	0.0	0.0	0.0	0.0	0.0	0.0	0.0	0.0	0.0	0.0	0.0	0.0	0.0	0.0	1.0	0.0	0.0	0.0	1.0
PATZ1	23598	symbol	H. sapiens	23598	H. sapiens	PATZ1	POZ/BTB and AT hook containing zinc finger 1	GO:0010596 negative regulation of endothelial cell migration;GO:0010633 negative regulation of epithelial cell migration;GO:0008584 male gonad development		Transcription factors:Zinc-coordinating DNA-binding domains; Disease related genes; Cancer-related genes; Predicted intracellular proteins	Nucleoplasm (Supported)		(M58)PID AR PATHWAY		0.0	0.0	0.0	0.0	0.0	0.0	0.0	0.0	0.0	0.0	0.0	0.0	0.0	1.0	0.0	0.0	0.0	0.0	0.0	0.0
PCDH10	57575	symbol	H. sapiens	57575	H. sapiens	PCDH10	protocadherin 10	GO:0007156 homophilic cell adhesion via plasma membrane adhesion molecules;GO:0098742 cell-cell adhesion via plasma-membrane adhesion molecules;GO:0098609 cell-cell adhesion			Golgi apparatus (Approved); Additional: Nucleoplasm;Vesicles				0.0	0.0	0.0	0.0	0.0	0.0	0.0	0.0	0.0	0.0	0.0	0.0	0.0	0.0	0.0	0.0	0.0	0.0	0.0	0.0
PCGF3	10336	symbol	H. sapiens	10336	H. sapiens	PCGF3	polycomb group ring finger 3	GO:0060819 inactivation of X chromosome by genetic imprinting;GO:0036353 histone H2A-K119 monoubiquitination;GO:0006349 regulation of gene expression by genetic imprinting		Predicted intracellular proteins	Nucleoplasm (Supported)				0.0	1.0	0.0	0.0	0.0	0.0	0.0	0.0	0.0	0.0	0.0	0.0	0.0	0.0	0.0	1.0	0.0	0.0	0.0	0.0
PCSK4	54760	symbol	H. sapiens	54760	H. sapiens	PCSK4	proprotein convertase subtilisin/kexin type 4	GO:0016486 peptide hormone processing;GO:0140448 signaling receptor ligand precursor processing;GO:0048240 sperm capacitation		Predicted intracellular proteins; Peptidases:Serine-type peptidases; Enzymes				(M5951)HALLMARK SPERMATOGENESIS	0.0	0.0	0.0	0.0	0.0	0.0	0.0	0.0	0.0	0.0	0.0	0.0	0.0	0.0	0.0	0.0	0.0	0.0	0.0	0.0
PDCD2L	84306	symbol	H. sapiens	84306	H. sapiens	PDCD2L	programmed cell death 2 like	GO:0007049 cell cycle;GO:0009987 cellular process;GO:0008150 biological_process		Cancer-related genes:Mutated cancer genes; Predicted intracellular proteins	Mitochondria (Approved)			(M5947)HALLMARK IL2 STAT5 SIGNALING	0.0	0.0	0.0	0.0	0.0	0.0	0.0	0.0	0.0	0.0	0.0	0.0	0.0	0.0	0.0	0.0	0.0	0.0	0.0	0.0
PDE4D	5144	symbol	H. sapiens	5144	H. sapiens	PDE4D	phosphodiesterase 4D	GO:0086024 adenylate cyclase-activating adrenergic receptor signaling pathway involved in positive regulation of heart rate;GO:1901898 negative regulation of relaxation of cardiac muscle;GO:0140200 adenylate cyclase-activating adrenergic receptor signaling pathway involved in regulation of heart rate		Predicted intracellular proteins; FDA approved drug targets:Small molecule drugs; ENZYME proteins:Hydrolases; Enzymes; Disease related genes	Plasma membrane (Supported); Additional: Cytosol	Adenosine phosphate; Dyphylline; Iloprost; Roflumilast; Piclamilast; Rolipram; 3,5-Dimethyl-1-(3-Nitrophenyl)-1h-Pyrazole-4-Carboxylic Acid Ethyl Ester; 2-[3-(2-Hydroxy-1,1-Dihydroxymethyl-Ethylamino)-Propylamino]-2-Hydroxymethyl-Propane-1,3-Diol; Zardaverine; 1-(4-Aminophenyl)-3,5-Dimethyl-1h-Pyrazole-4-Carboxylic Acid Ethyl Ester; (S)-Rolipram; Cilomilast; (R)-Rolipram; 3,5-Dimethyl-1h-Pyrazole…			0.0	0.0	0.0	0.0	0.0	0.0	0.0	0.0	0.0	0.0	0.0	0.0	0.0	0.0	0.0	0.0	0.0	0.0	0.0	0.0
PDE6B	5158	symbol	H. sapiens	5158	H. sapiens	PDE6B	phosphodiesterase 6B	GO:1990009 retinal cell apoptotic process;GO:0007603 phototransduction, visible light;GO:0043153 entrainment of circadian clock by photoperiod		Predicted intracellular proteins; FDA approved drug targets:Small molecule drugs; ENZYME proteins:Hydrolases; Enzymes; Disease related genes	Cytosol (Approved)		(M16518)ST WNT CA2 CYCLIC GMP PATHWAY; (M204)PID RHODOPSIN PATHWAY	(M5956)HALLMARK KRAS SIGNALING DN	1.0	0.0	0.0	0.0	0.0	0.0	1.0	0.0	0.0	0.0	0.0	0.0	0.0	0.0	0.0	0.0	0.0	0.0	0.0	1.0
PDGFA	5154	symbol	H. sapiens	5154	H. sapiens	PDGFA	platelet derived growth factor subunit A	GO:0060683 regulation of branching involved in salivary gland morphogenesis by epithelial-mesenchymal signaling;GO:0010512 negative regulation of phosphatidylinositol biosynthetic process;GO:1990401 embryonic lung development		Cancer-related genes:Candidate cancer biomarkers; RAS pathway related proteins; Candidate cardiovascular disease genes; Predicted intracellular proteins; Predicted secreted proteins	Golgi apparatus (Approved)		(M144)PID CERAMIDE PATHWAY; (M5883)NABA SECRETED FACTORS; (M5885)NABA MATRISOME ASSOCIATED	(M5944)HALLMARK ANGIOGENESIS; (M5939)HALLMARK P53 PATHWAY	0.0	0.0	1.0	0.0	1.0	1.0	0.0	0.0	0.0	0.0	1.0	1.0	0.0	1.0	0.0	1.0	1.0	1.0	0.0	1.0
PDXK	8566	symbol	H. sapiens	8566	H. sapiens	PDXK	pyridoxal kinase	GO:0009443 pyridoxal 5'-phosphate salvage;GO:0042823 pyridoxal phosphate biosynthetic process;GO:0042819 vitamin B6 biosynthetic process		ENZYME proteins:Transferases; Predicted intracellular proteins; FDA approved drug targets:Small molecule drugs; Enzymes	Nucleoplasm (Enhanced)	Pyridoxal; Pyridoxine; Adenosine-5'-[Beta, Gamma-Methylene]Triphosphate; O6-(R)-ROSCOVITINE, R-2-(6-BENZYLOXY-9-ISOPROPYL-9H-PURIN-2-YLAMINO)-BUTAN-1-OL; (2R)-2-({6-[benzyl(methyl)amino]-9-isopropyl-9H-purin-2-yl}amino)butan-1-ol			0.0	0.0	0.0	0.0	0.0	0.0	0.0	0.0	0.0	0.0	0.0	0.0	0.0	0.0	0.0	0.0	0.0	0.0	0.0	0.0
PEAR1	375033	symbol	H. sapiens	375033	H. sapiens	PEAR1	platelet endothelial aggregation receptor 1	GO:0043654 recognition of apoptotic cell;GO:0043277 apoptotic cell clearance;GO:0070527 platelet aggregation		Predicted intracellular proteins	Cell Junctions;Nucleoplasm (Approved); Additional: Centrosome				0.0	0.0	0.0	0.0	0.0	0.0	0.0	0.0	0.0	0.0	0.0	0.0	0.0	0.0	0.0	0.0	0.0	0.0	0.0	0.0
PELI1	57162	symbol	H. sapiens	57162	H. sapiens	PELI1	pellino E3 ubiquitin protein ligase 1	GO:0008592 regulation of Toll signaling pathway;GO:0034141 positive regulation of toll-like receptor 3 signaling pathway;GO:0008063 Toll signaling pathway		ENZYME proteins:Transferases; Predicted intracellular proteins; Enzymes	Intermediate filaments;Nucleoli;Nucleoplasm (Approved)			(M5913)HALLMARK INTERFERON GAMMA RESPONSE	0.0	0.0	1.0	0.0	0.0	0.0	0.0	0.0	0.0	0.0	0.0	0.0	0.0	0.0	0.0	0.0	0.0	0.0	0.0	1.0
PGAM1P5	100132594	symbol	H. sapiens	100132594	H. sapiens	PGAM1P5	phosphoglycerate mutase 1 pseudogene 5								0.0	0.0	0.0	0.0	0.0	0.0	0.0	0.0	0.0	0.0	0.0	0.0	0.0	0.0	0.0	0.0	0.0	0.0	0.0	0.0
PGM5P2	595135	symbol	H. sapiens	595135	H. sapiens	PGM5P2	phosphoglucomutase 5 pseudogene 2								0.0	0.0	0.0	0.0	0.0	0.0	0.0	0.0	0.0	0.0	0.0	0.0	0.0	0.0	0.0	0.0	0.0	0.0	0.0	0.0
PHC2	1912	symbol	H. sapiens	1912	H. sapiens	PHC2	polyhomeotic homolog 2	GO:0045892 negative regulation of transcription, DNA-templated;GO:1903507 negative regulation of nucleic acid-templated transcription;GO:1902679 negative regulation of RNA biosynthetic process		Predicted intracellular proteins	Nucleoplasm (Supported)				1.0	0.0	0.0	0.0	0.0	0.0	0.0	0.0	0.0	0.0	0.0	0.0	0.0	0.0	0.0	0.0	0.0	0.0	0.0	1.0
PIAS4	51588	symbol	H. sapiens	51588	H. sapiens	PIAS4	protein inhibitor of activated STAT 4	GO:1902174 positive regulation of keratinocyte apoptotic process;GO:0097283 keratinocyte apoptotic process;GO:1902172 regulation of keratinocyte apoptotic process		ENZYME proteins:Transferases; Predicted intracellular proteins; Enzymes	Nucleoplasm (Supported); Additional: Centrosome		(M228)PID SMAD2 3PATHWAY; (M161)PID IFNG PATHWAY; (M58)PID AR PATHWAY		1.0	0.0	0.0	0.0	0.0	0.0	0.0	0.0	0.0	0.0	0.0	0.0	0.0	0.0	0.0	0.0	0.0	0.0	0.0	0.0
PICK1	9463	symbol	H. sapiens	9463	H. sapiens	PICK1	protein interacting with PRKCA 1	GO:0034316 negative regulation of Arp2/3 complex-mediated actin nucleation;GO:0043045 DNA methylation involved in embryo development;GO:1901538 changes to DNA methylation involved in embryo development		Predicted intracellular proteins	Cytosol (Supported)			(M5909)HALLMARK MYOGENESIS	0.0	0.0	1.0	0.0	0.0	0.0	0.0	0.0	0.0	0.0	0.0	0.0	0.0	0.0	0.0	0.0	0.0	0.0	0.0	0.0
PIEZO2	63895	symbol	H. sapiens	63895	H. sapiens	PIEZO2	piezo type mechanosensitive ion channel component 2	GO:0050974 detection of mechanical stimulus involved in sensory perception;GO:0050982 detection of mechanical stimulus;GO:0071260 cellular response to mechanical stimulus		Transporters:Transporter channels and pores; Predicted intracellular proteins; Potential drug targets; Disease related genes	Cytosol;Plasma membrane (Approved)				0.0	0.0	0.0	0.0	0.0	0.0	0.0	0.0	0.0	0.0	0.0	0.0	0.0	0.0	0.0	0.0	0.0	0.0	0.0	0.0
PIK3C2B	5287	symbol	H. sapiens	5287	H. sapiens	PIK3C2B	phosphatidylinositol-4-phosphate 3-kinase catalytic subunit type 2 beta	GO:0036092 phosphatidylinositol-3-phosphate biosynthetic process;GO:0046854 phosphatidylinositol phosphate biosynthetic process;GO:0006661 phosphatidylinositol biosynthetic process		ENZYME proteins:Transferases; Predicted intracellular proteins; Enzymes	Nucleoplasm (Approved); Additional: Cytosol	Fostamatinib	(M231)PID KIT PATHWAY		0.0	0.0	0.0	0.0	0.0	0.0	0.0	0.0	0.0	0.0	0.0	0.0	0.0	0.0	0.0	0.0	0.0	0.0	1.0	0.0
PIK3R3	8503	symbol	H. sapiens	8503	H. sapiens	PIK3R3	phosphoinositide-3-kinase regulatory subunit 3	GO:0036092 phosphatidylinositol-3-phosphate biosynthetic process;GO:0043551 regulation of phosphatidylinositol 3-kinase activity;GO:0046854 phosphatidylinositol phosphate biosynthetic process		Cancer-related genes:Candidate cancer biomarkers; Predicted intracellular proteins; RAS pathway related proteins	Vesicles (Approved); Additional: Nucleoplasm	Isoprenaline; SF1126	(M79)PID TRAIL PATHWAY; (M193)PID NEPHRIN NEPH1 PATHWAY; (M127)PID ERBB1 RECEPTOR PROXIMAL PATHWAY	(M5923)HALLMARK PI3K AKT MTOR SIGNALING; (M5942)HALLMARK UV RESPONSE DN; (M5915)HALLMARK APICAL JUNCTION	1.0	0.0	1.0	0.0	0.0	1.0	0.0	1.0	0.0	0.0	0.0	0.0	0.0	1.0	0.0	1.0	1.0	0.0	1.0	1.0
PIM1	5292	symbol	H. sapiens	5292	H. sapiens	PIM1	Pim-1 proto-oncogene, serine/threonine kinase	GO:1905062 positive regulation of cardioblast proliferation;GO:2000138 positive regulation of cell proliferation involved in heart morphogenesis;GO:0070561 vitamin D receptor signaling pathway	CAMK Ser/Thr protein kinase family	Cancer-related genes:Candidate cancer biomarkers; ENZYME proteins:Transferases; Predicted intracellular proteins; Enzymes; Kinases:CAMK Ser/Thr protein kinases	Cytosol (Supported); Additional: Nucleoli	3,4-Dihydroxy-1-Methylquinolin-2(1h)-One; Staurosporine; LY-294002; Imidazole; (3e)-3-[(4-Hydroxyphenyl)Imino]-1h-Indol-2(3h)-One; Bisindolylmaleimide I; Quercetin; Phosphoaminophosphonic Acid-Adenylate Ester; Dexfosfoserine; S,S-(2-Hydroxyethyl)Thiocysteine; IMIDAZOPYRIDAZIN 1; 4-(4-hydroxy-3-methylphenyl)-6-phenylpyrimidin-2(5H)-one; (4R)-7,8-dichloro-1',9-dimethyl-1-oxo-1,2,4,9-tetrahydrospiro…	(M135)PID IL5 PATHWAY; (M182)PID IL3 PATHWAY; (M22)PID GMCSF PATHWAY	(M5897)HALLMARK IL6 JAK STAT3 SIGNALING; (M5947)HALLMARK IL2 STAT5 SIGNALING; (M5891)HALLMARK HYPOXIA	0.0	0.0	1.0	0.0	0.0	0.0	0.0	0.0	1.0	0.0	0.0	0.0	0.0	0.0	0.0	0.0	0.0	0.0	0.0	1.0
PIM3	415116	symbol	H. sapiens	415116	H. sapiens	PIM3	Pim-3 proto-oncogene, serine/threonine kinase	GO:0061179 negative regulation of insulin secretion involved in cellular response to glucose stimulus;GO:0046676 negative regulation of insulin secretion;GO:0090278 negative regulation of peptide hormone secretion	CAMK Ser/Thr protein kinase family	Cancer-related genes:Candidate cancer biomarkers; ENZYME proteins:Transferases; Predicted intracellular proteins; Enzymes; Kinases:CAMK Ser/Thr protein kinases	Cytosol (Supported)	Fostamatinib		(M5905)HALLMARK ADIPOGENESIS	0.0	0.0	0.0	0.0	0.0	0.0	0.0	0.0	0.0	0.0	0.0	0.0	0.0	0.0	0.0	0.0	0.0	0.0	0.0	0.0
PLAT	5327	symbol	H. sapiens	5327	H. sapiens	PLAT	plasminogen activator, tissue type	GO:0099183 trans-synaptic signaling by BDNF, modulating synaptic transmission;GO:0099191 trans-synaptic signaling by BDNF;GO:0060467 negative regulation of fertilization		Cancer-related genes:Candidate cancer biomarkers; Candidate cardiovascular disease genes; FDA approved drug targets:Biotech drugs; Predicted secreted proteins; FDA approved drug targets:Small molecule drugs; ENZYME proteins:Hydrolases; Enzymes; Disease related genes; Peptidases:Serine-type peptidases	Actin filaments (Approved)	Aminocaproic acid; Iloprost; Human C1-esterase inhibitor; 5-(DIMETHYLAMINO)-2-NAPHTHALENESULFONIC ACID; Dexibuprofen; Conestat alfa	(M169)PID INTEGRIN2 PATHWAY; (M159)PID AMB2 NEUTROPHILS PATHWAY; (M3468)NABA ECM REGULATORS	(M5946)HALLMARK COAGULATION; (M5902)HALLMARK APOPTOSIS; (M5921)HALLMARK COMPLEMENT	0.0	0.0	1.0	0.0	0.0	0.0	0.0	0.0	0.0	0.0	0.0	0.0	0.0	0.0	0.0	0.0	1.0	0.0	0.0	0.0
PLAU	5328	symbol	H. sapiens	5328	H. sapiens	PLAU	plasminogen activator, urokinase	GO:2000097 regulation of smooth muscle cell-matrix adhesion;GO:0061302 smooth muscle cell-matrix adhesion;GO:0031639 plasminogen activation		Cancer-related genes:Candidate cancer biomarkers; FDA approved drug targets:Biotech drugs; Predicted intracellular proteins; Predicted secreted proteins; Peptidases:Serine-type peptidases; ENZYME proteins:Hydrolases; Enzymes; Disease related genes		Amiloride; 2-{2-hydroxy-[1,1'-biphenyl]-3-yl}-1H-1,3-benzodiazole-5-carboximidamide; 2-(2-Hydroxy-5-Methoxy-Phenyl)-1h-Benzoimidazole-5-Carboxamidine; 6-(N-Phenylcarbamyl)-2-Naphthalenecarboxamidine; 2-(2-hydroxy-phenyl)-3H-benzoimidazole-5-carboxamidine; 6-[N-(4-(Aminomethyl)Phenyl)Carbamyl]-2-Naphthalenecarboxamidine; 6-[N-(1-Isopropyl-3,4-Dihydro-7-Isoquinolinyl)Carbamyl]-2-Naphthalenecarboxam…	(M212)PID INTEGRIN5 PATHWAY; (M169)PID INTEGRIN2 PATHWAY; (M63)PID AVB3 OPN PATHWAY	(M5946)HALLMARK COAGULATION; (M5890)HALLMARK TNFA SIGNALING VIA NFKB; (M5953)HALLMARK KRAS SIGNALING UP	0.0	0.0	1.0	0.0	0.0	0.0	0.0	0.0	0.0	0.0	1.0	0.0	0.0	1.0	0.0	1.0	0.0	0.0	1.0	0.0
PLCB1	23236	symbol	H. sapiens	23236	H. sapiens	PLCB1	phospholipase C beta 1	GO:0060466 activation of meiosis involved in egg activation;GO:2000438 negative regulation of monocyte extravasation;GO:0035724 CD24 biosynthetic process		Predicted intracellular proteins; ENZYME proteins:Hydrolases; Enzymes; Disease related genes; Potential drug targets	Plasma membrane (Approved)		(M252)PID IL8 CXCR1 PATHWAY; (M213)PID AR NONGENOMIC PATHWAY; (M210)PID IL8 CXCR2 PATHWAY	(M5923)HALLMARK PI3K AKT MTOR SIGNALING	1.0	0.0	0.0	0.0	0.0	1.0	0.0	0.0	1.0	1.0	1.0	0.0	0.0	0.0	0.0	1.0	1.0	0.0	0.0	1.0
PLCH2	9651	symbol	H. sapiens	9651	H. sapiens	PLCH2	phospholipase C eta 2	GO:0046488 phosphatidylinositol metabolic process;GO:0048015 phosphatidylinositol-mediated signaling;GO:0048017 inositol lipid-mediated signaling		Predicted intracellular proteins; ENZYME proteins:Hydrolases; Enzymes					0.0	0.0	0.0	0.0	0.0	0.0	0.0	0.0	0.0	0.0	0.0	0.0	0.0	0.0	0.0	0.0	0.0	0.0	0.0	0.0
PLCXD2	257068	symbol	H. sapiens	257068	H. sapiens	PLCXD2	phosphatidylinositol specific phospholipase C X domain containing 2	GO:0016042 lipid catabolic process;GO:0006629 lipid metabolic process;GO:1901575 organic substance catabolic process		Predicted intracellular proteins	Nucleoplasm (Approved)				0.0	0.0	0.0	0.0	0.0	0.0	0.0	0.0	0.0	0.0	0.0	0.0	0.0	0.0	0.0	0.0	0.0	0.0	0.0	0.0
PLD3	23646	symbol	H. sapiens	23646	H. sapiens	PLD3	phospholipase D family member 3	GO:0002534 cytokine production involved in inflammatory response;GO:1900015 regulation of cytokine production involved in inflammatory response;GO:0002532 production of molecular mediator involved in inflammatory response		Predicted intracellular proteins; ENZYME proteins:Hydrolases; Enzymes; Disease related genes; Potential drug targets	Cytosol;Endoplasmic reticulum (Approved); Additional: Nucleoplasm		(M15743)ST GA12 PATHWAY; (M7416)ST GAQ PATHWAY; (M12645)ST GA13 PATHWAY		0.0	0.0	0.0	0.0	0.0	0.0	0.0	0.0	1.0	0.0	0.0	0.0	0.0	0.0	0.0	0.0	0.0	0.0	0.0	0.0
PLEKHG2	64857	symbol	H. sapiens	64857	H. sapiens	PLEKHG2	pleckstrin homology and RhoGEF domain containing G2	GO:0030833 regulation of actin filament polymerization;GO:0008064 regulation of actin polymerization or depolymerization;GO:0030832 regulation of actin filament length		Predicted intracellular proteins; Disease related genes	Nucleoplasm (Approved); Additional: Cytosol			(M5893)HALLMARK MITOTIC SPINDLE	1.0	0.0	0.0	0.0	0.0	0.0	0.0	0.0	0.0	0.0	0.0	0.0	0.0	0.0	0.0	0.0	0.0	0.0	0.0	0.0
PLEKHG4B	153478	symbol	H. sapiens	153478	H. sapiens	PLEKHG4B	pleckstrin homology and RhoGEF domain containing G4B	GO:0051056 regulation of small GTPase mediated signal transduction;GO:0007264 small GTPase mediated signal transduction;GO:1902531 regulation of intracellular signal transduction		Predicted intracellular proteins	Nucleoplasm (Approved)				1.0	0.0	0.0	0.0	0.0	0.0	0.0	0.0	0.0	0.0	0.0	0.0	0.0	0.0	0.0	0.0	0.0	0.0	0.0	0.0
PLEKHG6	55200	symbol	H. sapiens	55200	H. sapiens	PLEKHG6	pleckstrin homology and RhoGEF domain containing G6	GO:0051056 regulation of small GTPase mediated signal transduction;GO:0007264 small GTPase mediated signal transduction;GO:1902531 regulation of intracellular signal transduction		Predicted intracellular proteins	Cell Junctions (Supported); Additional: Centrosome		(M68)PID RHOA REG PATHWAY		1.0	0.0	0.0	0.0	0.0	0.0	0.0	0.0	0.0	0.0	0.0	0.0	0.0	0.0	0.0	0.0	0.0	0.0	0.0	0.0
PLEKHH3	79990	symbol	H. sapiens	79990	H. sapiens	PLEKHH3	pleckstrin homology, MyTH4 and FERM domain containing H3	GO:0007165 signal transduction;GO:0023052 signaling;GO:0007154 cell communication		Predicted intracellular proteins	Golgi apparatus (Approved)				0.0	0.0	0.0	0.0	0.0	0.0	0.0	0.0	0.0	0.0	0.0	0.0	0.0	0.0	0.0	0.0	0.0	0.0	0.0	0.0
PLK3	1263	symbol	H. sapiens	1263	H. sapiens	PLK3	polo like kinase 3	GO:1904716 positive regulation of chaperone-mediated autophagy;GO:2000777 positive regulation of proteasomal ubiquitin-dependent protein catabolic process involved in cellular response to hypoxia;GO:0007113 endomitotic cell cycle	Other	ENZYME proteins:Transferases; Predicted intracellular proteins; Kinases; Enzymes		Fostamatinib	(M19)PID P73PATHWAY; (M145)PID P53 DOWNSTREAM PATHWAY	(M5939)HALLMARK P53 PATHWAY	0.0	0.0	0.0	0.0	0.0	0.0	0.0	0.0	0.0	0.0	0.0	0.0	0.0	0.0	0.0	0.0	0.0	0.0	0.0	0.0
PLSCR3	57048	symbol	H. sapiens	57048	H. sapiens	PLSCR3	phospholipid scramblase 3	GO:0032049 cardiolipin biosynthetic process;GO:0006655 phosphatidylglycerol biosynthetic process;GO:0032048 cardiolipin metabolic process		Predicted intracellular proteins; Transporters	Mitochondria (Supported)				0.0	0.0	0.0	0.0	0.0	0.0	0.0	0.0	0.0	0.0	0.0	0.0	0.0	0.0	0.0	0.0	0.0	0.0	0.0	0.0
PNKD	25953	symbol	H. sapiens	25953	H. sapiens	PNKD	PNKD metallo-beta-lactamase domain containing	GO:0019243 methylglyoxal catabolic process to D-lactate via S-lactoyl-glutathione;GO:0051596 methylglyoxal catabolic process;GO:0061727 methylglyoxal catabolic process to lactate		Predicted intracellular proteins; Disease related genes	Mitochondria (Enhanced)				0.0	0.0	0.0	0.0	0.0	0.0	0.0	0.0	0.0	0.0	0.0	0.0	0.0	0.0	0.0	0.0	0.0	0.0	0.0	0.0
POLB	5423	symbol	H. sapiens	5423	H. sapiens	POLB	DNA polymerase beta	GO:0006286 base-excision repair, base-free sugar-phosphate removal;GO:0098502 DNA dephosphorylation;GO:0071707 immunoglobulin heavy chain V-D-J recombination		ENZYME proteins:Transferases; Predicted intracellular proteins; FDA approved drug targets:Small molecule drugs; Enzymes	Vesicles (Uncertain)	Cytarabine; Iron; dATP; (1S)-1,2,3,4-TETRAHYDRO-BENZO[C]PHENANTHRENE-2,3,4-TRIOL; Ferrous gluconate; Ferrous succinate; Ferrous ascorbate; Ferrous fumarate; Ferrous glycine sulfate		(M5898)HALLMARK DNA REPAIR	1.0	1.0	0.0	0.0	1.0	1.0	0.0	0.0	0.0	0.0	0.0	0.0	0.0	0.0	0.0	0.0	0.0	0.0	0.0	0.0
POLR3D	661	symbol	H. sapiens	661	H. sapiens	POLR3D	RNA polymerase III subunit D	GO:0032728 positive regulation of interferon-beta production;GO:0006383 transcription by RNA polymerase III;GO:0032608 interferon-beta production		Predicted intracellular proteins; RNA polymerase related proteins	Nucleoplasm (Enhanced)		(M66)PID MYC ACTIV PATHWAY		0.0	0.0	0.0	0.0	0.0	0.0	0.0	0.0	0.0	0.0	0.0	0.0	0.0	0.0	0.0	0.0	0.0	0.0	0.0	0.0
POMK	84197	symbol	H. sapiens	84197	H. sapiens	POMK	protein O-mannose kinase	GO:0046835 carbohydrate phosphorylation;GO:0006493 protein O-linked glycosylation;GO:0019233 sensory perception of pain	Other	ENZYME proteins:Transferases; Kinases; Enzymes; Disease related genes; Potential drug targets	Nucleoplasm (Approved); Additional: Cytosol				0.0	0.0	0.0	0.0	0.0	0.0	0.0	0.0	0.0	1.0	0.0	0.0	0.0	0.0	0.0	0.0	0.0	0.0	0.0	0.0
POP5	51367	symbol	H. sapiens	51367	H. sapiens	POP5	POP5 homolog, ribonuclease P/MRP subunit	GO:0001682 tRNA 5'-leader removal;GO:0099116 tRNA 5'-end processing;GO:0034471 ncRNA 5'-end processing		Predicted intracellular proteins; ENZYME proteins:Hydrolases; Enzymes	Nucleoplasm (Approved); Additional: Nucleoli				0.0	0.0	0.0	0.0	0.0	0.0	0.0	1.0	0.0	0.0	0.0	0.0	0.0	0.0	0.0	0.0	0.0	0.0	0.0	0.0
POU3F3	5455	symbol	H. sapiens	5455	H. sapiens	POU3F3	POU class 3 homeobox 3	GO:0072024 macula densa development;GO:0072051 juxtaglomerular apparatus development;GO:0072206 metanephric juxtaglomerular apparatus development		Predicted intracellular proteins; Transcription factors:Helix-turn-helix domains	Nucleoplasm (Enhanced)				0.0	0.0	0.0	0.0	0.0	0.0	0.0	0.0	0.0	1.0	0.0	0.0	0.0	0.0	0.0	0.0	0.0	1.0	0.0	0.0
POU5F1P5	100009667	symbol	H. sapiens	100009667	H. sapiens	POU5F1P5	POU class 5 homeobox 1 pseudogene 5								0.0	0.0	0.0	0.0	0.0	0.0	0.0	0.0	0.0	0.0	0.0	0.0	0.0	0.0	0.0	0.0	0.0	0.0	0.0	0.0
PPFIA3	8541	symbol	H. sapiens	8541	H. sapiens	PPFIA3	PTPRF interacting protein alpha 3	GO:0016081 synaptic vesicle docking;GO:0048172 regulation of short-term neuronal synaptic plasticity;GO:0006904 vesicle docking involved in exocytosis		Predicted intracellular proteins	Nucleoli fibrillar center;Vesicles (Uncertain)				0.0	0.0	0.0	0.0	0.0	0.0	0.0	0.0	0.0	0.0	0.0	0.0	0.0	0.0	0.0	0.0	0.0	0.0	0.0	0.0
PPM1H	57460	symbol	H. sapiens	57460	H. sapiens	PPM1H	protein phosphatase, Mg2+/Mn2+ dependent 1H	GO:0006470 protein dephosphorylation;GO:0016311 dephosphorylation;GO:0006796 phosphate-containing compound metabolic process		Predicted intracellular proteins; ENZYME proteins:Hydrolases; Enzymes	Nucleoplasm (Supported)				0.0	0.0	0.0	0.0	0.0	0.0	0.0	0.0	0.0	0.0	0.0	0.0	0.0	0.0	0.0	0.0	0.0	0.0	0.0	0.0
PPM1L	151742	symbol	H. sapiens	151742	H. sapiens	PPM1L	protein phosphatase, Mg2+/Mn2+ dependent 1L	GO:0030148 sphingolipid biosynthetic process;GO:0046467 membrane lipid biosynthetic process;GO:0006665 sphingolipid metabolic process		Predicted intracellular proteins; ENZYME proteins:Hydrolases; Enzymes	Cytosol (Approved); Additional: Nucleoplasm				0.0	0.0	0.0	0.0	0.0	0.0	0.0	0.0	0.0	0.0	0.0	0.0	0.0	0.0	0.0	0.0	0.0	0.0	0.0	0.0
PPP1R14A	94274	symbol	H. sapiens	94274	H. sapiens	PPP1R14A	protein phosphatase 1 regulatory inhibitor subunit 14A	GO:0043086 negative regulation of catalytic activity;GO:0044092 negative regulation of molecular function;GO:0042325 regulation of phosphorylation		Predicted intracellular proteins	Nucleoplasm (Supported); Additional: Nuclear bodies		(M71)PID ILK PATHWAY		1.0	0.0	0.0	0.0	0.0	0.0	0.0	0.0	0.0	0.0	0.0	0.0	0.0	0.0	0.0	0.0	0.0	0.0	0.0	0.0
PPP1R14B	26472	symbol	H. sapiens	26472	H. sapiens	PPP1R14B	protein phosphatase 1 regulatory inhibitor subunit 14B	GO:0043086 negative regulation of catalytic activity;GO:0045087 innate immune response;GO:0098542 defense response to other organism		Predicted intracellular proteins			(M71)PID ILK PATHWAY		0.0	0.0	0.0	0.0	0.0	0.0	0.0	0.0	0.0	0.0	0.0	0.0	0.0	0.0	0.0	0.0	0.0	0.0	0.0	0.0
PPP1R15A	23645	symbol	H. sapiens	23645	H. sapiens	PPP1R15A	protein phosphatase 1 regulatory subunit 15A	GO:0036497 eIF2alpha dephosphorylation in response to endoplasmic reticulum stress;GO:1903916 regulation of endoplasmic reticulum stress-induced eIF2 alpha dephosphorylation;GO:1903917 positive regulation of endoplasmic reticulum stress-induced eIF2 alpha dephosphorylation		Cancer-related genes:Candidate cancer biomarkers; Predicted intracellular proteins	Vesicles (Uncertain)		(M181)PID BMP PATHWAY; (M286)PID TGFBR PATHWAY	(M5896)HALLMARK TGF BETA SIGNALING; (M5890)HALLMARK TNFA SIGNALING VIA NFKB; (M5891)HALLMARK HYPOXIA	1.0	0.0	0.0	0.0	0.0	0.0	0.0	0.0	0.0	0.0	0.0	0.0	0.0	0.0	0.0	0.0	0.0	0.0	0.0	0.0
PPP1R3F	89801	symbol	H. sapiens	89801	H. sapiens	PPP1R3F	protein phosphatase 1 regulatory subunit 3F	GO:2000465 regulation of glycogen (starch) synthase activity;GO:0005979 regulation of glycogen biosynthetic process;GO:0010962 regulation of glucan biosynthetic process		Predicted intracellular proteins	Nucleoplasm;Vesicles (Approved)				0.0	0.0	0.0	0.0	0.0	0.0	0.0	0.0	0.0	0.0	0.0	0.0	0.0	0.0	0.0	0.0	0.0	0.0	0.0	0.0
PPP6R2	9701	symbol	H. sapiens	9701	H. sapiens	PPP6R2	protein phosphatase 6 regulatory subunit 2	GO:0043666 regulation of phosphoprotein phosphatase activity;GO:0010921 regulation of phosphatase activity;GO:0035304 regulation of protein dephosphorylation		Predicted intracellular proteins	Cytosol;Vesicles (Supported)				0.0	0.0	0.0	0.0	0.0	0.0	0.0	0.0	0.0	0.0	0.0	0.0	0.0	0.0	0.0	0.0	0.0	0.0	0.0	0.0
PRKAR1B	5575	symbol	H. sapiens	5575	H. sapiens	PRKAR1B	protein kinase cAMP-dependent type I regulatory subunit beta	GO:0098693 regulation of synaptic vesicle cycle;GO:2000480 negative regulation of cAMP-dependent protein kinase activity;GO:2000479 regulation of cAMP-dependent protein kinase activity		Predicted intracellular proteins			(M277)PID INTEGRIN A4B1 PATHWAY		0.0	0.0	1.0	0.0	0.0	0.0	0.0	0.0	0.0	0.0	0.0	0.0	0.0	0.0	0.0	0.0	0.0	0.0	0.0	1.0
PRKRIP1	79706	symbol	H. sapiens	79706	H. sapiens	PRKRIP1	PRKR interacting protein 1	GO:0003014 renal system process;GO:0006469 negative regulation of protein kinase activity;GO:0033673 negative regulation of kinase activity		Predicted intracellular proteins	Actin filaments (Supported); Additional: Cytosol				0.0	0.0	0.0	0.0	0.0	0.0	0.0	0.0	0.0	0.0	0.0	0.0	0.0	0.0	0.0	0.0	0.0	0.0	0.0	0.0
PRMT1	3276	symbol	H. sapiens	3276	H. sapiens	PRMT1	protein arginine methyltransferase 1	GO:0019919 peptidyl-arginine methylation, to asymmetrical-dimethyl arginine;GO:0043985 histone H4-R3 methylation;GO:0046985 positive regulation of hemoglobin biosynthetic process		ENZYME proteins:Transferases; Predicted intracellular proteins; Enzymes	Nucleoplasm (Supported)	S-adenosyl-L-homocysteine	(M145)PID P53 DOWNSTREAM PATHWAY		1.0	0.0	0.0	1.0	1.0	0.0	0.0	0.0	1.0	0.0	0.0	0.0	0.0	0.0	0.0	0.0	0.0	0.0	0.0	0.0
PRR26	414235	gene_synonym	H. sapiens	414235	H. sapiens	DIP2C-AS1	DIP2C antisense RNA 1								0.0	0.0	0.0	0.0	0.0	0.0	0.0	0.0	0.0	0.0	0.0	0.0	0.0	0.0	0.0	0.0	0.0	0.0	0.0	0.0
PRRT3	285368	symbol	H. sapiens	285368	H. sapiens	PRRT3	proline rich transmembrane protein 3			Predicted intracellular proteins	Plasma membrane (Approved); Additional: Nucleoplasm				0.0	0.0	0.0	0.0	0.0	0.0	0.0	0.0	0.0	0.0	0.0	0.0	0.0	0.0	0.0	0.0	0.0	0.0	0.0	0.0
PRSS3	5646	symbol	H. sapiens	5646	H. sapiens	PRSS3	serine protease 3	GO:0031638 zymogen activation;GO:0019730 antimicrobial humoral response;GO:0007586 digestion		Predicted intracellular proteins; Predicted secreted proteins; Peptidases:Serine-type peptidases; ENZYME proteins:Hydrolases; Enzymes	Vesicles (Approved); Additional: Endoplasmic reticulum	4-(1,3,2-Dioxaborolan-2-Yloxy)Butan-1-Aminium; 4-Hydroxybutan-1-Aminium; 4-(Hydroxymethyl)Benzamidine; Benzamidine; Diamino-N-[3-(1,3,2-dioxaborolan-2-yloxy)propyl]methaniminium; Guanidine-3-propanol; [4-(1,3,2-Dioxaborolan-2-Yloxy)Methyl]Benzamidine; 1,3,2-Dioxaborolan-2-Ol	(M3468)NABA ECM REGULATORS; (M5885)NABA MATRISOME ASSOCIATED; (M5889)NABA MATRISOME	(M5921)HALLMARK COMPLEMENT	0.0	0.0	0.0	0.0	0.0	0.0	0.0	0.0	0.0	0.0	0.0	0.0	0.0	1.0	0.0	0.0	0.0	0.0	0.0	0.0
PSMA7	5688	symbol	H. sapiens	5688	H. sapiens	PSMA7	proteasome 20S subunit alpha 7	GO:0010498 proteasomal protein catabolic process;GO:0006511 ubiquitin-dependent protein catabolic process;GO:0019941 modification-dependent protein catabolic process		Predicted intracellular proteins; Peptidases:Threonine-type peptidases; ENZYME proteins:Hydrolases; Enzymes		acetylleucyl-leucyl-norleucinal; (3AR,6R,6AS)-6-((S)-((S)-CYCLOHEX-2-ENYL)(HYDROXY)METHYL)-6A-METHYL-4-OXO-HEXAHYDRO-2H-FURO[3,2-C]PYRROLE-6-CARBALDEHYDE		(M5926)HALLMARK MYC TARGETS V1	1.0	1.0	1.0	0.0	0.0	0.0	0.0	1.0	0.0	0.0	0.0	0.0	0.0	0.0	0.0	1.0	0.0	0.0	0.0	1.0
PSMB1	5689	symbol	H. sapiens	5689	H. sapiens	PSMB1	proteasome 20S subunit beta 1	GO:0010498 proteasomal protein catabolic process;GO:0051603 proteolysis involved in cellular protein catabolic process;GO:0044257 cellular protein catabolic process		Predicted intracellular proteins; Peptidases:Threonine-type peptidases; FDA approved drug targets:Small molecule drugs; ENZYME proteins:Hydrolases; Enzymes	Nucleoplasm (Supported)	Bortezomib; (3AR,6R,6AS)-6-((S)-((S)-CYCLOHEX-2-ENYL)(HYDROXY)METHYL)-6A-METHYL-4-OXO-HEXAHYDRO-2H-FURO[3,2-C]PYRROLE-6-CARBALDEHYDE; Carfilzomib			1.0	1.0	1.0	0.0	0.0	0.0	0.0	1.0	0.0	0.0	0.0	0.0	0.0	0.0	0.0	1.0	0.0	0.0	0.0	1.0
PSMB4	5692	symbol	H. sapiens	5692	H. sapiens	PSMB4	proteasome 20S subunit beta 4	GO:0002862 negative regulation of inflammatory response to antigenic stimulus;GO:0002861 regulation of inflammatory response to antigenic stimulus;GO:0002437 inflammatory response to antigenic stimulus		Predicted intracellular proteins; Peptidases:Threonine-type peptidases; ENZYME proteins:Hydrolases; Enzymes	Nucleoplasm (Supported); Additional: Mitochondria	(3AR,6R,6AS)-6-((S)-((S)-CYCLOHEX-2-ENYL)(HYDROXY)METHYL)-6A-METHYL-4-OXO-HEXAHYDRO-2H-FURO[3,2-C]PYRROLE-6-CARBALDEHYDE			1.0	1.0	1.0	0.0	0.0	0.0	0.0	1.0	0.0	0.0	0.0	0.0	0.0	0.0	0.0	1.0	0.0	0.0	0.0	1.0
PSMD4	5710	symbol	H. sapiens	5710	H. sapiens	PSMD4	proteasome 26S subunit ubiquitin receptor, non-ATPase 4	GO:0043248 proteasome assembly;GO:0043161 proteasome-mediated ubiquitin-dependent protein catabolic process;GO:0010498 proteasomal protein catabolic process		Cancer-related genes:Candidate cancer biomarkers; Predicted intracellular proteins	Nucleoplasm (Enhanced); Additional: Cytosol				1.0	1.0	1.0	0.0	0.0	0.0	0.0	1.0	0.0	0.0	0.0	0.0	0.0	0.0	0.0	1.0	0.0	0.0	0.0	1.0
PSMD8	5714	symbol	H. sapiens	5714	H. sapiens	PSMD8	proteasome 26S subunit, non-ATPase 8	GO:0043161 proteasome-mediated ubiquitin-dependent protein catabolic process;GO:0010498 proteasomal protein catabolic process;GO:0006511 ubiquitin-dependent protein catabolic process		Predicted intracellular proteins	Cytosol (Approved); Additional: Nuclear speckles			(M5926)HALLMARK MYC TARGETS V1	1.0	1.0	1.0	0.0	0.0	0.0	0.0	1.0	0.0	0.0	0.0	0.0	0.0	0.0	0.0	1.0	0.0	0.0	0.0	1.0
PTENP1	11191	symbol	H. sapiens	11191	H. sapiens	PTENP1	phosphatase and tensin homolog pseudogene 1								0.0	0.0	0.0	0.0	0.0	0.0	0.0	0.0	0.0	0.0	0.0	0.0	0.0	0.0	0.0	0.0	0.0	0.0	0.0	0.0
PTGER4	5734	symbol	H. sapiens	5734	H. sapiens	PTGER4	prostaglandin E receptor 4	GO:0072682 eosinophil extravasation;GO:2000419 regulation of eosinophil extravasation;GO:2000420 negative regulation of eosinophil extravasation		FDA approved drug targets:Small molecule drugs; G-protein coupled receptors:GPCRs excl olfactory receptors		Dinoprostone; Misoprostol; Limaprost; Castor oil; Grapiprant		(M5890)HALLMARK TNFA SIGNALING VIA NFKB; (M5932)HALLMARK INFLAMMATORY RESPONSE	0.0	0.0	0.0	0.0	0.0	1.0	0.0	0.0	0.0	0.0	0.0	1.0	0.0	0.0	1.0	0.0	0.0	0.0	0.0	0.0
PTGES	9536	symbol	H. sapiens	9536	H. sapiens	PTGES	prostaglandin E synthase	GO:0031620 regulation of fever generation;GO:0001660 fever generation;GO:0032308 positive regulation of prostaglandin secretion		ENZYME proteins:Isomerase; Enzymes	Endoplasmic reticulum (Supported)			(M5906)HALLMARK ESTROGEN RESPONSE EARLY; (M5907)HALLMARK ESTROGEN RESPONSE LATE; (M5934)HALLMARK XENOBIOTIC METABOLISM	0.0	0.0	0.0	0.0	0.0	0.0	0.0	0.0	0.0	0.0	0.0	0.0	0.0	0.0	0.0	0.0	0.0	0.0	0.0	0.0
PTGS2	5743	symbol	H. sapiens	5743	H. sapiens	PTGS2	prostaglandin-endoperoxide synthase 2	GO:0010335 response to non-ionic osmotic stress;GO:0071471 cellular response to non-ionic osmotic stress;GO:0032227 negative regulation of synaptic transmission, dopaminergic		Cancer-related genes:Candidate cancer biomarkers; Predicted intracellular proteins; FDA approved drug targets:Small molecule drugs; Enzymes; ENZYME proteins:Oxidoreductases	Endoplasmic reticulum (Supported)	Dihomo-gamma-linolenic acid; Icosapent; Aminosalicylic acid; Mesalazine; Acetaminophen; Indomethacin; Nabumetone; Ketorolac; Tenoxicam; Lenalidomide; Celecoxib; Tolmetin; Rofecoxib; Piroxicam; Fenoprofen; Valdecoxib; Diclofenac; Sulindac; Flurbiprofen; Etodolac; Mefenamic acid; Naproxen; Sulfasalazine; Phenylbutazone; Meloxicam; Carprofen; Diflunisal; Suprofen; Salicylic acid; Meclofenamic acid; …	(M103)PID S1P S1P1 PATHWAY; (M235)PID TCR CALCIUM PATHWAY; (M229)PID P38 ALPHA BETA DOWNSTREAM PATHWAY	(M5890)HALLMARK TNFA SIGNALING VIA NFKB; (M5913)HALLMARK INTERFERON GAMMA RESPONSE; (M5953)HALLMARK KRAS SIGNALING UP	0.0	0.0	1.0	0.0	0.0	1.0	0.0	0.0	0.0	0.0	0.0	0.0	0.0	1.0	1.0	1.0	0.0	0.0	0.0	0.0
PTOV1	53635	symbol	H. sapiens	53635	H. sapiens	PTOV1	PTOV1 extended AT-hook containing adaptor protein	GO:0045944 positive regulation of transcription by RNA polymerase II;GO:0045893 positive regulation of transcription, DNA-templated;GO:1903508 positive regulation of nucleic acid-templated transcription		Predicted intracellular proteins	Nucleoplasm (Supported)				0.0	0.0	0.0	0.0	0.0	0.0	0.0	0.0	0.0	0.0	0.0	0.0	0.0	0.0	0.0	0.0	0.0	0.0	0.0	0.0
PTPN3	5774	symbol	H. sapiens	5774	H. sapiens	PTPN3	protein tyrosine phosphatase non-receptor type 3	GO:0098902 regulation of membrane depolarization during action potential;GO:0051045 negative regulation of membrane protein ectodomain proteolysis;GO:0051043 regulation of membrane protein ectodomain proteolysis		Predicted intracellular proteins; ENZYME proteins:Hydrolases; Enzymes					0.0	0.0	0.0	0.0	0.0	0.0	0.0	0.0	0.0	0.0	0.0	0.0	0.0	0.0	0.0	0.0	1.0	0.0	0.0	1.0
PTPRD	5789	symbol	H. sapiens	5789	H. sapiens	PTPRD	protein tyrosine phosphatase receptor type D	GO:0007185 transmembrane receptor protein tyrosine phosphatase signaling pathway;GO:0099545 trans-synaptic signaling by trans-synaptic complex;GO:0097105 presynaptic membrane assembly		Predicted intracellular proteins; ENZYME proteins:Hydrolases; Enzymes	Vesicles (Approved); Additional: Nucleoplasm			(M5941)HALLMARK UV RESPONSE UP	0.0	0.0	0.0	0.0	0.0	0.0	0.0	0.0	0.0	0.0	1.0	0.0	0.0	0.0	0.0	0.0	0.0	0.0	0.0	0.0
PTRHD1	391356	symbol	H. sapiens	391356	H. sapiens	PTRHD1	peptidyl-tRNA hydrolase domain containing 1			Predicted intracellular proteins; ENZYME proteins:Hydrolases; Enzymes	Nucleoplasm (Approved)				0.0	0.0	0.0	0.0	0.0	0.0	0.0	0.0	0.0	0.0	0.0	0.0	0.0	0.0	0.0	0.0	0.0	0.0	0.0	0.0
PVRL2	5819	gene_synonym	H. sapiens	5819	H. sapiens	NECTIN2	nectin cell adhesion molecule 2	GO:0046814 coreceptor-mediated virion attachment to host cell;GO:0060370 susceptibility to T cell mediated cytotoxicity;GO:0042271 susceptibility to natural killer cell mediated cytotoxicity		Predicted intracellular proteins; CD markers	Cell Junctions;Nucleoli fibrillar center (Approved)		(M72)PID NECTIN PATHWAY; (M232)PID ECADHERIN STABILIZATION PATHWAY	(M5915)HALLMARK APICAL JUNCTION	0.0	0.0	0.0	0.0	0.0	0.0	0.0	0.0	0.0	0.0	1.0	0.0	0.0	0.0	0.0	0.0	0.0	0.0	0.0	0.0
PXDN	7837	symbol	H. sapiens	7837	H. sapiens	PXDN	peroxidasin	GO:0070831 basement membrane assembly;GO:0071711 basement membrane organization;GO:0042744 hydrogen peroxide catabolic process		Predicted intracellular proteins; Predicted secreted proteins; Enzymes; ENZYME proteins:Oxidoreductases; Disease related genes; Potential drug targets			(M3008)NABA ECM GLYCOPROTEINS; (M5884)NABA CORE MATRISOME; (M5889)NABA MATRISOME		1.0	0.0	0.0	0.0	0.0	0.0	0.0	0.0	0.0	0.0	0.0	0.0	0.0	0.0	0.0	0.0	0.0	0.0	0.0	0.0
PYCR1	5831	symbol	H. sapiens	5831	H. sapiens	PYCR1	pyrroline-5-carboxylate reductase 1	GO:0006561 proline biosynthetic process;GO:0055129 L-proline biosynthetic process;GO:0006560 proline metabolic process		Predicted intracellular proteins; Enzymes; ENZYME proteins:Oxidoreductases; Disease related genes; Potential drug targets		NADH; Proline		(M5934)HALLMARK XENOBIOTIC METABOLISM	0.0	0.0	0.0	0.0	0.0	0.0	0.0	1.0	0.0	0.0	0.0	0.0	0.0	0.0	0.0	0.0	0.0	0.0	0.0	0.0
PYCR2	29920	symbol	H. sapiens	29920	H. sapiens	PYCR2	pyrroline-5-carboxylate reductase 2	GO:0006561 proline biosynthetic process;GO:0055129 L-proline biosynthetic process;GO:0006560 proline metabolic process		Predicted intracellular proteins; Enzymes; ENZYME proteins:Oxidoreductases; Disease related genes; Potential drug targets	Mitochondria (Approved)	NADH; Proline			0.0	0.0	0.0	0.0	0.0	0.0	0.0	1.0	0.0	0.0	0.0	0.0	0.0	0.0	0.0	0.0	0.0	0.0	0.0	0.0
PYGB	5834	symbol	H. sapiens	5834	H. sapiens	PYGB	glycogen phosphorylase B	GO:0005980 glycogen catabolic process;GO:0009251 glucan catabolic process;GO:0044247 cellular polysaccharide catabolic process		ENZYME proteins:Transferases; Candidate cardiovascular disease genes; Enzymes; Predicted intracellular proteins	Cytosol (Approved)	Pyridoxal phosphate; Alvocidib		(M5937)HALLMARK GLYCOLYSIS	0.0	0.0	0.0	0.0	0.0	0.0	0.0	0.0	0.0	0.0	0.0	0.0	0.0	0.0	0.0	0.0	0.0	0.0	0.0	0.0
PYGM	5837	symbol	H. sapiens	5837	H. sapiens	PYGM	glycogen phosphorylase, muscle associated	GO:0005980 glycogen catabolic process;GO:0009251 glucan catabolic process;GO:0044247 cellular polysaccharide catabolic process		ENZYME proteins:Transferases; Predicted intracellular proteins; Enzymes; Disease related genes; Potential drug targets		Pyridoxal phosphate; Beta-D-Glucopyranose Spirohydantoin; (5S,7R,8S,9S,10R)-3-Amino-8,9,10-trihydroxy-7-(hydroxymethyl)-6-oxa-1,3-diazaspiro[4.5]decane-2,4-dione; alpha-D-glucose 6-phosphate; N-beta-D-glucopyranosylacetamide; Monofluorophosphate ion; Beta-D-Glucose; 3,8,9,10-tetrahydroxy-7-hydroxymethyl-6-oxa-1,3-diaza-spiro[4.5]decane-2,4-dione; Nojirimycine Tetrazole; Indirubin-5-sulphonate; 2-…		(M5891)HALLMARK HYPOXIA; (M5909)HALLMARK MYOGENESIS	0.0	0.0	0.0	0.0	0.0	0.0	0.0	0.0	0.0	0.0	0.0	0.0	0.0	0.0	0.0	0.0	0.0	0.0	0.0	0.0
QSOX1	5768	symbol	H. sapiens	5768	H. sapiens	QSOX1	quiescin sulfhydryl oxidase 1	GO:0016242 negative regulation of macroautophagy;GO:0085029 extracellular matrix assembly;GO:0010507 negative regulation of autophagy		Predicted intracellular proteins; Predicted secreted proteins; Enzymes; ENZYME proteins:Oxidoreductases	Golgi apparatus (Supported); Additional: Vesicles			(M5930)HALLMARK EPITHELIAL MESENCHYMAL TRANSITION; (M5937)HALLMARK GLYCOLYSIS	0.0	0.0	1.0	0.0	0.0	0.0	0.0	0.0	0.0	0.0	0.0	0.0	0.0	0.0	0.0	0.0	0.0	0.0	0.0	0.0
RAB11FIP4	84440	symbol	H. sapiens	84440	H. sapiens	RAB11FIP4	RAB11 family interacting protein 4	GO:0032456 endocytic recycling;GO:0032465 regulation of cytokinesis;GO:0098876 vesicle-mediated transport to the plasma membrane		Predicted intracellular proteins					0.0	0.0	0.0	0.0	0.0	0.0	0.0	0.0	0.0	0.0	0.0	0.0	0.0	0.0	0.0	0.0	0.0	0.0	0.0	0.0
RAB26	25837	symbol	H. sapiens	25837	H. sapiens	RAB26	RAB26, member RAS oncogene family	GO:0099575 regulation of protein catabolic process at presynapse, modulating synaptic transmission;GO:0099171 presynaptic modulation of chemical synaptic transmission;GO:0043001 Golgi to plasma membrane protein transport		Predicted intracellular proteins	Plasma membrane;Vesicles (Uncertain); Additional: Centrosome				0.0	0.0	0.0	0.0	0.0	0.0	0.0	0.0	0.0	0.0	0.0	0.0	0.0	0.0	0.0	0.0	0.0	0.0	0.0	0.0
RAB43	339122	symbol	H. sapiens	339122	H. sapiens	RAB43	RAB43, member RAS oncogene family	GO:0035526 retrograde transport, plasma membrane to Golgi;GO:0090382 phagosome maturation;GO:0019068 virion assembly		Predicted intracellular proteins	Plasma membrane (Supported)				0.0	0.0	0.0	0.0	0.0	0.0	0.0	0.0	0.0	0.0	0.0	0.0	0.0	0.0	0.0	0.0	0.0	0.0	0.0	0.0
RABEPK	10244	symbol	H. sapiens	10244	H. sapiens	RABEPK	Rab9 effector protein with kelch motifs	GO:0006904 vesicle docking involved in exocytosis;GO:0048278 vesicle docking;GO:0140056 organelle localization by membrane tethering		Predicted intracellular proteins	Plasma membrane (Uncertain)			(M5928)HALLMARK MYC TARGETS V2	0.0	0.0	0.0	0.0	0.0	0.0	0.0	0.0	0.0	0.0	0.0	0.0	0.0	0.0	0.0	0.0	0.0	0.0	0.0	0.0
RANBP17	64901	symbol	H. sapiens	64901	H. sapiens	RANBP17	RAN binding protein 17	GO:0006611 protein export from nucleus;GO:0051028 mRNA transport;GO:0006606 protein import into nucleus		Transporters:Transporter channels and pores; Predicted intracellular proteins	Nuclear bodies (Approved); Additional: Cytosol;Nuclear membrane				0.0	0.0	0.0	0.0	0.0	0.0	0.0	0.0	0.0	0.0	0.0	0.0	0.0	0.0	0.0	0.0	0.0	0.0	0.0	0.0
RAP1GAP2	23108	symbol	H. sapiens	23108	H. sapiens	RAP1GAP2	RAP1 GTPase activating protein 2	GO:0090630 activation of GTPase activity;GO:0008361 regulation of cell size;GO:0043547 positive regulation of GTPase activity		Predicted intracellular proteins	Cytosol;Nuclear membrane (Supported)				0.0	0.0	0.0	0.0	0.0	0.0	0.0	0.0	0.0	0.0	0.0	0.0	0.0	0.0	0.0	0.0	0.0	0.0	0.0	0.0
RARB	5915	symbol	H. sapiens	5915	H. sapiens	RARB	retinoic acid receptor beta	GO:0055012 ventricular cardiac muscle cell differentiation;GO:0021756 striatum development;GO:0003417 growth plate cartilage development		Cancer-related genes:Candidate cancer biomarkers; Transcription factors:Zinc-coordinating DNA-binding domains; Predicted intracellular proteins; FDA approved drug targets:Small molecule drugs; Disease related genes; Nuclear receptors	Nucleoplasm (Enhanced)	Adapalene; Acitretin; Alitretinoin; Tretinoin; Tazarotene; Etretinate; Arotinoid acid; Tamibarotene; LGD-1550; Trifarotene	(M162)PID RXR VDR PATHWAY; (M207)PID RETINOIC ACID PATHWAY		1.0	0.0	0.0	1.0	1.0	1.0	1.0	0.0	1.0	1.0	1.0	1.0	0.0	0.0	0.0	0.0	0.0	1.0	0.0	0.0
RASGRF2	5924	symbol	H. sapiens	5924	H. sapiens	RASGRF2	Ras protein specific guanine nucleotide releasing factor 2	GO:2000310 regulation of NMDA receptor activity;GO:0099601 regulation of neurotransmitter receptor activity;GO:0035023 regulation of Rho protein signal transduction		Predicted intracellular proteins; RAS pathway related proteins	Endoplasmic reticulum (Supported)		(M269)PID RAS PATHWAY; (M241)PID RAC1 REG PATHWAY		1.0	0.0	0.0	0.0	0.0	0.0	0.0	0.0	0.0	0.0	0.0	0.0	0.0	0.0	0.0	0.0	0.0	0.0	0.0	1.0
RASGRP1	10125	symbol	H. sapiens	10125	H. sapiens	RASGRP1	RAS guanyl releasing protein 1	GO:0032825 positive regulation of natural killer cell differentiation;GO:0033089 positive regulation of T cell differentiation in thymus;GO:0032823 regulation of natural killer cell differentiation		Predicted intracellular proteins; Disease related genes; RAS pathway related proteins	Cytosol (Supported); Additional: Plasma membrane		(M269)PID RAS PATHWAY; (M9526)ST T CELL SIGNAL TRANSDUCTION; (M88)PID CD8 TCR PATHWAY	(M5941)HALLMARK UV RESPONSE UP; (M5906)HALLMARK ESTROGEN RESPONSE EARLY; (M5921)HALLMARK COMPLEMENT	1.0	0.0	1.0	0.0	0.0	1.0	0.0	0.0	0.0	0.0	0.0	0.0	0.0	0.0	0.0	0.0	0.0	0.0	0.0	1.0
RASL10B	91608	symbol	H. sapiens	91608	H. sapiens	RASL10B	RAS like family 10 member B	GO:0003050 regulation of systemic arterial blood pressure by atrial natriuretic peptide;GO:0001990 regulation of systemic arterial blood pressure by hormone;GO:0003044 regulation of systemic arterial blood pressure mediated by a chemical signal		Predicted intracellular proteins	Vesicles (Approved)				0.0	0.0	0.0	0.0	0.0	0.0	0.0	0.0	0.0	0.0	0.0	0.0	0.0	0.0	0.0	0.0	0.0	0.0	0.0	0.0
RASSF7	8045	symbol	H. sapiens	8045	H. sapiens	RASSF7	Ras association domain family member 7	GO:0070507 regulation of microtubule cytoskeleton organization;GO:0032886 regulation of microtubule-based process;GO:0051493 regulation of cytoskeleton organization		Predicted intracellular proteins	Centriolar satellite (Supported)				0.0	0.0	0.0	0.0	0.0	0.0	0.0	0.0	0.0	0.0	0.0	0.0	0.0	0.0	0.0	0.0	0.0	0.0	0.0	0.0
RBCK1	10616	symbol	H. sapiens	10616	H. sapiens	RBCK1	RANBP2-type and C3HC4-type zinc finger containing 1	GO:0097039 protein linear polyubiquitination;GO:0060546 negative regulation of necroptotic process;GO:0062099 negative regulation of programmed necrotic cell death		ENZYME proteins:Transferases; Predicted intracellular proteins; Enzymes; Disease related genes; Potential drug targets				(M5913)HALLMARK INTERFERON GAMMA RESPONSE; (M5937)HALLMARK GLYCOLYSIS	0.0	0.0	0.0	0.0	0.0	0.0	0.0	0.0	0.0	0.0	0.0	0.0	0.0	0.0	0.0	0.0	0.0	0.0	0.0	1.0
RBM10	8241	symbol	H. sapiens	8241	H. sapiens	RBM10	RNA binding motif protein 10	GO:0034393 positive regulation of smooth muscle cell apoptotic process;GO:0048025 negative regulation of mRNA splicing, via spliceosome;GO:0070935 3'-UTR-mediated mRNA stabilization		Cancer-related genes:Mutated cancer genes; Predicted intracellular proteins; Disease related genes	Nuclear speckles (Enhanced)				0.0	0.0	0.0	0.0	0.0	0.0	0.0	0.0	0.0	0.0	0.0	0.0	0.0	0.0	0.0	0.0	0.0	0.0	0.0	0.0
RBM15	64783	symbol	H. sapiens	64783	H. sapiens	RBM15	RNA binding motif protein 15	GO:0038163 thrombopoietin-mediated signaling pathway;GO:0007221 positive regulation of transcription of Notch receptor target;GO:0009048 dosage compensation by inactivation of X chromosome		Predicted intracellular proteins; Disease related genes; Cancer-related genes	Nucleoplasm (Enhanced)				1.0	1.0	0.0	1.0	1.0	0.0	0.0	0.0	1.0	0.0	0.0	0.0	0.0	1.0	0.0	0.0	0.0	0.0	0.0	0.0
RBM15B	29890	symbol	H. sapiens	29890	H. sapiens	RBM15B	RNA binding motif protein 15B	GO:0009048 dosage compensation by inactivation of X chromosome;GO:0007549 dosage compensation;GO:0006406 mRNA export from nucleus		Predicted intracellular proteins	Nucleoplasm (Enhanced)				0.0	1.0	0.0	0.0	0.0	0.0	0.0	0.0	0.0	0.0	0.0	0.0	0.0	0.0	0.0	0.0	0.0	0.0	0.0	0.0
RBMXL2	27288	symbol	H. sapiens	27288	H. sapiens	RBMXL2	RBMX like 2	GO:0000377 RNA splicing, via transesterification reactions with bulged adenosine as nucleophile;GO:0000398 mRNA splicing, via spliceosome;GO:0000375 RNA splicing, via transesterification reactions		Predicted intracellular proteins					0.0	0.0	0.0	0.0	0.0	0.0	0.0	0.0	0.0	0.0	0.0	0.0	0.0	0.0	0.0	0.0	0.0	0.0	0.0	0.0
RCE1	9986	symbol	H. sapiens	9986	H. sapiens	RCE1	Ras converting CAAX endopeptidase 1	GO:0071586 CAAX-box protein processing;GO:0080120 CAAX-box protein maturation;GO:0018342 protein prenylation		Peptidases:Threonine-type peptidases; Enzymes				(M5921)HALLMARK COMPLEMENT	0.0	1.0	0.0	0.0	0.0	0.0	0.0	0.0	0.0	0.0	0.0	0.0	0.0	0.0	0.0	0.0	0.0	0.0	0.0	1.0
RECQL5	9400	symbol	H. sapiens	9400	H. sapiens	RECQL5	RecQ like helicase 5	GO:0072757 cellular response to camptothecin;GO:1901563 response to camptothecin;GO:1990414 replication-born double-strand break repair via sister chromatid exchange		Predicted intracellular proteins; ENZYME proteins:Hydrolases; Enzymes	Nucleoplasm (Supported); Additional: Cytosol				1.0	0.0	0.0	0.0	0.0	0.0	0.0	0.0	0.0	0.0	0.0	0.0	0.0	0.0	0.0	0.0	0.0	0.0	0.0	0.0
RELN	5649	symbol	H. sapiens	5649	H. sapiens	RELN	reelin	GO:1902076 regulation of lateral motor column neuron migration;GO:1902078 positive regulation of lateral motor column neuron migration;GO:1905483 regulation of motor neuron migration		Predicted intracellular proteins; Predicted secreted proteins; Disease related genes	Golgi apparatus (Approved); Additional: Vesicles		(M69)PID REELIN PATHWAY; (M163)PID LIS1 PATHWAY; (M3008)NABA ECM GLYCOPROTEINS	(M5953)HALLMARK KRAS SIGNALING UP	1.0	0.0	0.0	0.0	0.0	0.0	0.0	1.0	0.0	1.0	1.0	0.0	0.0	1.0	0.0	0.0	1.0	0.0	0.0	0.0
REPIN1	29803	symbol	H. sapiens	29803	H. sapiens	REPIN1	replication initiator 1	GO:0006260 DNA replication;GO:0006357 regulation of transcription by RNA polymerase II;GO:0006366 transcription by RNA polymerase II		Predicted intracellular proteins	Nucleoplasm (Supported)				0.0	0.0	0.0	0.0	0.0	0.0	0.0	0.0	0.0	0.0	0.0	0.0	0.0	0.0	0.0	0.0	0.0	0.0	0.0	0.0
RFPL1S	10740	symbol	H. sapiens	10740	H. sapiens	RFPL1S	RFPL1 antisense RNA 1								0.0	0.0	0.0	0.0	0.0	0.0	0.0	0.0	0.0	0.0	0.0	0.0	0.0	0.0	0.0	0.0	0.0	0.0	0.0	0.0
RFXANK	8625	symbol	H. sapiens	8625	H. sapiens	RFXANK	regulatory factor X associated ankyrin containing protein	GO:0007265 Ras protein signal transduction;GO:0007264 small GTPase mediated signal transduction;GO:0045944 positive regulation of transcription by RNA polymerase II		Predicted intracellular proteins; Disease related genes; Transcription factors:Yet undefined DNA-binding domains	Nucleoplasm (Enhanced)		(M30)PID HDAC CLASSII PATHWAY		0.0	0.0	0.0	0.0	0.0	0.0	0.0	0.0	0.0	0.0	0.0	0.0	0.0	0.0	0.0	0.0	0.0	0.0	0.0	0.0
RGS2	5997	symbol	H. sapiens	5997	H. sapiens	RGS2	regulator of G protein signaling 2	GO:0140194 negative regulation of adenylate cyclase-inhibiting adrenergic receptor signaling pathway involved in heart process;GO:0086096 adenylate cyclase-inhibiting adrenergic receptor signaling pathway involved in heart process;GO:0140193 regulation of adenylate cyclase-inhibiting adrenergic receptor signaling pathway involved in heart process		Predicted intracellular proteins	Cytosol (Supported)				0.0	0.0	0.0	1.0	0.0	0.0	0.0	0.0	1.0	1.0	1.0	0.0	0.0	0.0	0.0	0.0	0.0	0.0	0.0	0.0
RHBDD3	25807	symbol	H. sapiens	25807	H. sapiens	RHBDD3	rhomboid domain containing 3	GO:0032815 negative regulation of natural killer cell activation;GO:0032814 regulation of natural killer cell activation;GO:0002673 regulation of acute inflammatory response			Microtubules (Approved)				0.0	0.0	0.0	0.0	0.0	0.0	0.0	0.0	0.0	0.0	0.0	0.0	0.0	0.0	0.0	0.0	0.0	0.0	0.0	0.0
RHOB	388	symbol	H. sapiens	388	H. sapiens	RHOB	ras homolog family member B	GO:0003159 morphogenesis of an endothelium;GO:0061154 endothelial tube morphogenesis;GO:0008333 endosome to lysosome transport		Cancer-related genes:Candidate cancer biomarkers; Predicted intracellular proteins		Botulinum toxin type A	(M153)PID P75 NTR PATHWAY; (M124)PID CXCR4 PATHWAY	(M5941)HALLMARK UV RESPONSE UP; (M5902)HALLMARK APOPTOSIS; (M5947)HALLMARK IL2 STAT5 SIGNALING	1.0	0.0	1.0	0.0	1.0	0.0	0.0	1.0	0.0	0.0	0.0	0.0	1.0	1.0	0.0	0.0	0.0	0.0	0.0	0.0
RHPN2	85415	symbol	H. sapiens	85415	H. sapiens	RHPN2	rhophilin Rho GTPase binding protein 2	GO:0003094 glomerular filtration;GO:0097205 renal filtration;GO:0051497 negative regulation of stress fiber assembly		Predicted intracellular proteins					1.0	0.0	0.0	0.0	0.0	0.0	0.0	0.0	0.0	0.0	0.0	0.0	0.0	0.0	0.0	0.0	0.0	0.0	0.0	0.0
RMRP	6023	symbol	H. sapiens	6023	H. sapiens	RMRP	RNA component of mitochondrial RNA processing endoribonuclease	GO:0062103 double-stranded RNA biosynthetic process;GO:1903704 negative regulation of production of siRNA involved in RNA interference;GO:1900369 negative regulation of RNA interference							0.0	0.0	1.0	0.0	0.0	0.0	0.0	0.0	0.0	0.0	0.0	0.0	0.0	0.0	0.0	0.0	0.0	0.0	0.0	0.0
RNASEH1-AS1	100506054	gene_synonym	H. sapiens	100506054	H. sapiens	RNASEH1-DT	RNASEH1 divergent transcript								0.0	0.0	0.0	0.0	0.0	0.0	0.0	0.0	0.0	0.0	0.0	0.0	0.0	0.0	0.0	0.0	0.0	0.0	0.0	0.0
RNASET2	8635	symbol	H. sapiens	8635	H. sapiens	RNASET2	ribonuclease T2	GO:0090502 RNA phosphodiester bond hydrolysis, endonucleolytic;GO:0090501 RNA phosphodiester bond hydrolysis;GO:0090305 nucleic acid phosphodiester bond hydrolysis		Predicted intracellular proteins; Predicted secreted proteins; Disease related genes					0.0	0.0	0.0	0.0	0.0	0.0	0.0	0.0	0.0	0.0	0.0	0.0	0.0	0.0	0.0	0.0	0.0	0.0	0.0	0.0
RNF152	220441	symbol	H. sapiens	220441	H. sapiens	RNF152	ring finger protein 152	GO:1904262 negative regulation of TORC1 signaling;GO:1903432 regulation of TORC1 signaling;GO:0032007 negative regulation of TOR signaling		ENZYME proteins:Transferases; Predicted intracellular proteins; Enzymes					0.0	0.0	0.0	0.0	0.0	0.0	0.0	0.0	0.0	0.0	0.0	0.0	0.0	0.0	0.0	1.0	0.0	0.0	0.0	0.0
RNF166	115992	symbol	H. sapiens	115992	H. sapiens	RNF166	ring finger protein 166	GO:0000209 protein polyubiquitination;GO:0006914 autophagy;GO:0061919 process utilizing autophagic mechanism		Predicted intracellular proteins	Nucleoplasm (Approved); Additional: Cytosol;Plasma membrane				0.0	0.0	0.0	0.0	0.0	0.0	0.0	0.0	0.0	0.0	0.0	0.0	0.0	0.0	0.0	0.0	0.0	0.0	0.0	0.0
RNF215	200312	symbol	H. sapiens	200312	H. sapiens	RNF215	ring finger protein 215	GO:0006896 Golgi to vacuole transport;GO:0006623 protein targeting to vacuole;GO:0072666 establishment of protein localization to vacuole		Predicted intracellular proteins	Microtubules (Approved); Additional: Nucleoli				0.0	0.0	0.0	0.0	0.0	0.0	0.0	0.0	0.0	0.0	0.0	0.0	0.0	0.0	0.0	0.0	0.0	0.0	0.0	0.0
RNF216	54476	symbol	H. sapiens	54476	H. sapiens	RNF216	ring finger protein 216	GO:0099546 protein catabolic process, modulating synaptic transmission;GO:0140246 protein catabolic process at synapse;GO:0032480 negative regulation of type I interferon production		ENZYME proteins:Transferases; Predicted intracellular proteins; Enzymes; Disease related genes; Potential drug targets	Cytosol (Supported); Additional: Nucleoplasm				0.0	0.0	0.0	0.0	0.0	0.0	0.0	0.0	0.0	0.0	0.0	0.0	0.0	0.0	0.0	0.0	0.0	0.0	0.0	0.0
RNF216P1	441191	symbol	H. sapiens	441191	H. sapiens	RNF216P1	ring finger protein 216 pseudogene 1								0.0	0.0	0.0	0.0	0.0	0.0	0.0	0.0	0.0	0.0	0.0	0.0	0.0	0.0	0.0	0.0	0.0	0.0	0.0	0.0
RNFT2	84900	symbol	H. sapiens	84900	H. sapiens	RNFT2	ring finger protein, transmembrane 2	GO:1904294 positive regulation of ERAD pathway;GO:1904292 regulation of ERAD pathway;GO:1905898 positive regulation of response to endoplasmic reticulum stress			Nucleoplasm (Approved); Additional: Cytosol				0.0	0.0	0.0	0.0	0.0	0.0	0.0	0.0	0.0	0.0	0.0	0.0	0.0	0.0	0.0	0.0	0.0	0.0	0.0	0.0
RNU11	26824	symbol	H. sapiens	26824	H. sapiens	RNU11	RNA, U11 small nuclear	GO:0000395 mRNA 5'-splice site recognition;GO:0045292 mRNA cis splicing, via spliceosome;GO:0006376 mRNA splice site selection							0.0	0.0	0.0	0.0	0.0	0.0	0.0	0.0	0.0	0.0	0.0	0.0	0.0	0.0	0.0	0.0	0.0	0.0	0.0	0.0
RNU12	267010	symbol	H. sapiens	267010	H. sapiens	RNU12	RNA, U12 small nuclear								0.0	0.0	0.0	0.0	0.0	0.0	0.0	0.0	0.0	0.0	0.0	0.0	0.0	0.0	0.0	0.0	0.0	0.0	0.0	0.0
RNU6ATAC	100151684	symbol	H. sapiens	100151684	H. sapiens	RNU6ATAC	RNA, U6atac small nuclear (U12-dependent splicing)	GO:0000395 mRNA 5'-splice site recognition;GO:0000244 spliceosomal tri-snRNP complex assembly;GO:0045292 mRNA cis splicing, via spliceosome							0.0	0.0	0.0	0.0	0.0	0.0	0.0	0.0	0.0	0.0	0.0	0.0	0.0	0.0	0.0	0.0	0.0	0.0	0.0	0.0
ROMO1	140823	symbol	H. sapiens	140823	H. sapiens	ROMO1	reactive oxygen species modulator 1	GO:0051715 cytolysis in other organism;GO:0051801 cytolysis in other organism involved in symbiotic interaction;GO:0051838 cytolysis by host of symbiont cells		Transporters:Transporter channels and pores; Predicted intracellular proteins					0.0	0.0	0.0	0.0	0.0	0.0	0.0	0.0	0.0	0.0	0.0	0.0	0.0	0.0	0.0	0.0	0.0	0.0	0.0	0.0
RPL10A	4736	symbol	H. sapiens	4736	H. sapiens	RPL10A	ribosomal protein L10a	GO:0000470 maturation of LSU-rRNA;GO:0042273 ribosomal large subunit biogenesis;GO:0045471 response to ethanol		Predicted intracellular proteins; Ribosomal proteins	Cytosol;Endoplasmic reticulum (Supported); Additional: Nucleoli				1.0	0.0	0.0	0.0	0.0	0.0	0.0	1.0	0.0	0.0	0.0	0.0	0.0	0.0	0.0	0.0	0.0	0.0	0.0	0.0
RPL13AP20	387841	symbol	H. sapiens	387841	H. sapiens	RPL13AP20	ribosomal protein L13a pseudogene 20								0.0	0.0	0.0	0.0	0.0	0.0	0.0	0.0	0.0	0.0	0.0	0.0	0.0	0.0	0.0	0.0	0.0	0.0	0.0	0.0
RPL41	6171	symbol	H. sapiens	6171	H. sapiens	RPL41	ribosomal protein L41	GO:0002181 cytoplasmic translation;GO:0006412 translation;GO:0043043 peptide biosynthetic process		Predicted intracellular proteins; Ribosomal proteins	Endoplasmic reticulum (Supported)				1.0	0.0	0.0	0.0	0.0	0.0	0.0	1.0	0.0	0.0	0.0	0.0	0.0	0.0	0.0	0.0	0.0	0.0	0.0	0.0
RPP21	79897	symbol	H. sapiens	79897	H. sapiens	RPP21	ribonuclease P/MRP subunit p21	GO:0001682 tRNA 5'-leader removal;GO:0099116 tRNA 5'-end processing;GO:0034471 ncRNA 5'-end processing		Predicted intracellular proteins; ENZYME proteins:Hydrolases; Enzymes					0.0	0.0	0.0	0.0	0.0	0.0	0.0	1.0	0.0	0.0	0.0	0.0	0.0	0.0	0.0	0.0	0.0	0.0	0.0	0.0
RPP25L	138716	symbol	H. sapiens	138716	H. sapiens	RPP25L	ribonuclease P/MRP subunit p25 like	GO:0001682 tRNA 5'-leader removal;GO:0099116 tRNA 5'-end processing;GO:0034471 ncRNA 5'-end processing		Predicted intracellular proteins	Nucleoplasm (Supported)				0.0	0.0	0.0	0.0	0.0	0.0	0.0	0.0	0.0	0.0	0.0	0.0	0.0	0.0	0.0	0.0	0.0	0.0	0.0	0.0
RPPH1	85495	symbol	H. sapiens	85495	H. sapiens	RPPH1	ribonuclease P RNA component H1	GO:0090502 RNA phosphodiester bond hydrolysis, endonucleolytic;GO:0008033 tRNA processing;GO:0090501 RNA phosphodiester bond hydrolysis							0.0	0.0	0.0	0.0	0.0	0.0	0.0	0.0	0.0	0.0	0.0	0.0	0.0	0.0	0.0	0.0	0.0	0.0	0.0	0.0
RPS17	6218	symbol	H. sapiens	6218	H. sapiens	RPS17	ribosomal protein S17	GO:0042274 ribosomal small subunit biogenesis;GO:0006413 translational initiation;GO:0034101 erythrocyte homeostasis		Predicted intracellular proteins; Ribosomal proteins; Disease related genes	Cytosol;Endoplasmic reticulum (Approved); Additional: Nucleoli	Artenimol			1.0	0.0	0.0	0.0	0.0	0.0	0.0	1.0	0.0	0.0	0.0	0.0	0.0	0.0	0.0	0.0	0.0	0.0	0.0	0.0
RPS20	6224	symbol	H. sapiens	6224	H. sapiens	RPS20	ribosomal protein S20	GO:1904667 negative regulation of ubiquitin protein ligase activity;GO:0051444 negative regulation of ubiquitin-protein transferase activity;GO:1904666 regulation of ubiquitin protein ligase activity		Predicted intracellular proteins; Ribosomal proteins	Cytosol;Endoplasmic reticulum (Supported)				1.0	0.0	0.0	0.0	0.0	0.0	0.0	1.0	0.0	0.0	0.0	0.0	0.0	0.0	0.0	0.0	0.0	0.0	0.0	0.0
RPS23	6228	symbol	H. sapiens	6228	H. sapiens	RPS23	ribosomal protein S23	GO:1990145 maintenance of translational fidelity;GO:0034063 stress granule assembly;GO:0002181 cytoplasmic translation		Predicted intracellular proteins; Ribosomal proteins; Disease related genes	Cytosol;Endoplasmic reticulum (Enhanced)				1.0	0.0	0.0	0.0	0.0	0.0	0.0	1.0	0.0	0.0	0.0	0.0	0.0	0.0	0.0	0.0	0.0	0.0	0.0	0.0
RPS25	6230	symbol	H. sapiens	6230	H. sapiens	RPS25	ribosomal protein S25	GO:0042274 ribosomal small subunit biogenesis;GO:0002181 cytoplasmic translation;GO:0006364 rRNA processing		Predicted intracellular proteins; Ribosomal proteins	Cytosol;Endoplasmic reticulum (Supported); Additional: Nucleoli				1.0	0.0	0.0	0.0	0.0	0.0	0.0	1.0	0.0	0.0	0.0	0.0	0.0	0.0	0.0	0.0	0.0	0.0	0.0	0.0
RPS29	6235	symbol	H. sapiens	6235	H. sapiens	RPS29	ribosomal protein S29	GO:0002181 cytoplasmic translation;GO:0006412 translation;GO:0043043 peptide biosynthetic process		Predicted intracellular proteins; Ribosomal proteins; Disease related genes	Cytosol;Endoplasmic reticulum (Supported)				1.0	0.0	0.0	0.0	0.0	0.0	0.0	1.0	0.0	0.0	0.0	0.0	0.0	0.0	0.0	0.0	0.0	0.0	0.0	0.0
RPS5	6193	symbol	H. sapiens	6193	H. sapiens	RPS5	ribosomal protein S5	GO:0000028 ribosomal small subunit assembly;GO:0006450 regulation of translational fidelity;GO:0042255 ribosome assembly		Predicted intracellular proteins; Ribosomal proteins	Cytosol;Endoplasmic reticulum (Supported)	Artenimol		(M5926)HALLMARK MYC TARGETS V1	1.0	0.0	0.0	0.0	0.0	0.0	0.0	1.0	0.0	0.0	0.0	0.0	0.0	0.0	0.0	0.0	0.0	0.0	0.0	0.0
RPSAP58	388524	symbol	H. sapiens	388524	H. sapiens	RPSAP58	ribosomal protein SA pseudogene 58								0.0	0.0	0.0	0.0	0.0	0.0	0.0	0.0	0.0	0.0	0.0	0.0	0.0	0.0	0.0	0.0	0.0	0.0	0.0	0.0
RPUSD2	27079	symbol	H. sapiens	27079	H. sapiens	RPUSD2	RNA pseudouridine synthase domain containing 2	GO:0000455 enzyme-directed rRNA pseudouridine synthesis;GO:1990481 mRNA pseudouridine synthesis;GO:0031118 rRNA pseudouridine synthesis		Predicted intracellular proteins	Microtubules;Nucleoplasm (Approved)				0.0	0.0	0.0	0.0	0.0	0.0	0.0	0.0	0.0	0.0	0.0	0.0	0.0	0.0	0.0	0.0	0.0	0.0	0.0	0.0
RSPO2	340419	symbol	H. sapiens	340419	H. sapiens	RSPO2	R-spondin 2	GO:0042483 negative regulation of odontogenesis;GO:0042489 negative regulation of odontogenesis of dentin-containing tooth;GO:0110111 negative regulation of animal organ morphogenesis		Predicted intracellular proteins; Predicted secreted proteins; Cancer-related genes			(M3008)NABA ECM GLYCOPROTEINS; (M5884)NABA CORE MATRISOME; (M5889)NABA MATRISOME		1.0	0.0	0.0	0.0	1.0	0.0	0.0	0.0	0.0	0.0	0.0	1.0	0.0	0.0	1.0	0.0	0.0	0.0	0.0	0.0
RTKN2	219790	symbol	H. sapiens	219790	H. sapiens	RTKN2	rhotekin 2	GO:1901224 positive regulation of NIK/NF-kappaB signaling;GO:2001243 negative regulation of intrinsic apoptotic signaling pathway;GO:1901222 regulation of NIK/NF-kappaB signaling		Predicted intracellular proteins	Nucleoplasm (Approved); Additional: Mitochondria				0.0	0.0	0.0	0.0	0.0	0.0	0.0	0.0	0.0	0.0	0.0	0.0	0.0	0.0	0.0	0.0	0.0	0.0	0.0	0.0
RTL1	388015	symbol	H. sapiens	388015	H. sapiens	RTL1	retrotransposon Gag like 1				Cytosol (Approved)				0.0	0.0	0.0	0.0	0.0	0.0	0.0	0.0	0.0	0.0	0.0	0.0	0.0	0.0	0.0	0.0	0.0	0.0	0.0	0.0
RTN1	6252	symbol	H. sapiens	6252	H. sapiens	RTN1	reticulon 1	GO:1902430 negative regulation of amyloid-beta formation;GO:1902992 negative regulation of amyloid precursor protein catabolic process;GO:1902003 regulation of amyloid-beta formation			Endoplasmic reticulum (Supported); Additional: Nuclear bodies			(M5919)HALLMARK HEDGEHOG SIGNALING	0.0	0.0	0.0	0.0	0.0	0.0	0.0	0.0	0.0	0.0	0.0	0.0	0.0	0.0	0.0	0.0	0.0	0.0	0.0	0.0
SAMD10	140700	symbol	H. sapiens	140700	H. sapiens	SAMD10	sterile alpha motif domain containing 10	GO:0007169 transmembrane receptor protein tyrosine kinase signaling pathway;GO:0007167 enzyme linked receptor protein signaling pathway;GO:0007166 cell surface receptor signaling pathway		Predicted intracellular proteins	Nucleoplasm (Approved)				0.0	0.0	0.0	0.0	0.0	0.0	0.0	0.0	0.0	0.0	0.0	0.0	0.0	0.0	0.0	0.0	1.0	0.0	0.0	0.0
SAMD12	401474	symbol	H. sapiens	401474	H. sapiens	SAMD12	sterile alpha motif domain containing 12	GO:0007169 transmembrane receptor protein tyrosine kinase signaling pathway;GO:0007167 enzyme linked receptor protein signaling pathway;GO:0007166 cell surface receptor signaling pathway		Predicted intracellular proteins	Cytosol;Golgi apparatus (Approved)				0.0	0.0	0.0	0.0	0.0	0.0	0.0	0.0	0.0	0.0	0.0	0.0	0.0	0.0	0.0	0.0	1.0	0.0	0.0	0.0
SAMD14	201191	symbol	H. sapiens	201191	H. sapiens	SAMD14	sterile alpha motif domain containing 14	GO:0019722 calcium-mediated signaling;GO:0019932 second-messenger-mediated signaling;GO:0007015 actin filament organization		Predicted intracellular proteins	Nucleoli fibrillar center;Nucleoplasm (Approved)				0.0	0.0	0.0	0.0	0.0	0.0	0.0	0.0	0.0	0.0	0.0	0.0	0.0	0.0	0.0	0.0	0.0	0.0	0.0	0.0
SARDH	1757	symbol	H. sapiens	1757	H. sapiens	SARDH	sarcosine dehydrogenase	GO:1901053 sarcosine catabolic process;GO:1901052 sarcosine metabolic process;GO:0042219 cellular modified amino acid catabolic process		Predicted intracellular proteins; Enzymes; ENZYME proteins:Oxidoreductases; Disease related genes; Potential drug targets	Mitochondria (Approved)				0.0	0.0	0.0	0.0	0.0	0.0	0.0	1.0	0.0	0.0	0.0	0.0	0.0	0.0	0.0	0.0	0.0	0.0	0.0	0.0
SARM1	23098	symbol	H. sapiens	23098	H. sapiens	SARM1	sterile alpha and TIR motif containing 1	GO:0034128 negative regulation of MyD88-independent toll-like receptor signaling pathway;GO:0034127 regulation of MyD88-independent toll-like receptor signaling pathway;GO:0019677 NAD catabolic process		Predicted intracellular proteins	Vesicles (Approved)				0.0	0.0	0.0	0.0	0.0	0.0	0.0	0.0	0.0	0.0	1.0	0.0	0.0	0.0	0.0	0.0	0.0	0.0	0.0	0.0
SCAP	22937	symbol	H. sapiens	22937	H. sapiens	SCAP	SREBF chaperone	GO:0045541 negative regulation of cholesterol biosynthetic process;GO:0090206 negative regulation of cholesterol metabolic process;GO:0106119 negative regulation of sterol biosynthetic process					(M7997)SA CASPASE CASCADE		0.0	0.0	0.0	0.0	0.0	0.0	0.0	0.0	0.0	0.0	0.0	0.0	0.0	0.0	0.0	0.0	0.0	0.0	0.0	0.0
SCARNA10	692148	symbol	H. sapiens	692148	H. sapiens	SCARNA10	small Cajal body-specific RNA 10	GO:0006396 RNA processing;GO:0016070 RNA metabolic process;GO:0090304 nucleic acid metabolic process							0.0	0.0	0.0	0.0	0.0	0.0	0.0	0.0	0.0	0.0	0.0	0.0	0.0	0.0	0.0	0.0	0.0	0.0	0.0	0.0
SCARNA12	677777	symbol	H. sapiens	677777	H. sapiens	SCARNA12	small Cajal body-specific RNA 12	GO:0006396 RNA processing;GO:0016070 RNA metabolic process;GO:0090304 nucleic acid metabolic process							0.0	0.0	0.0	0.0	0.0	0.0	0.0	0.0	0.0	0.0	0.0	0.0	0.0	0.0	0.0	0.0	0.0	0.0	0.0	0.0
SCARNA16	677781	symbol	H. sapiens	677781	H. sapiens	SCARNA16	small Cajal body-specific RNA 16	GO:0006396 RNA processing;GO:0016070 RNA metabolic process;GO:0090304 nucleic acid metabolic process							0.0	0.0	0.0	0.0	0.0	0.0	0.0	0.0	0.0	0.0	0.0	0.0	0.0	0.0	0.0	0.0	0.0	0.0	0.0	0.0
SCARNA17	677769	symbol	H. sapiens	677769	H. sapiens	SCARNA17	small Cajal body-specific RNA 17	GO:0006396 RNA processing;GO:0016070 RNA metabolic process;GO:0090304 nucleic acid metabolic process							0.0	0.0	0.0	0.0	0.0	0.0	0.0	0.0	0.0	0.0	0.0	0.0	0.0	0.0	0.0	0.0	0.0	0.0	0.0	0.0
SCARNA2	677766	symbol	H. sapiens	677766	H. sapiens	SCARNA2	small Cajal body-specific RNA 2	GO:0006396 RNA processing;GO:0016070 RNA metabolic process;GO:0090304 nucleic acid metabolic process							0.0	0.0	0.0	0.0	0.0	0.0	0.0	0.0	0.0	0.0	0.0	0.0	0.0	0.0	0.0	0.0	0.0	0.0	0.0	0.0
SCARNA22	677770	symbol	H. sapiens	677770	H. sapiens	SCARNA22	small Cajal body-specific RNA 22	GO:0006396 RNA processing;GO:0016070 RNA metabolic process;GO:0090304 nucleic acid metabolic process							0.0	0.0	0.0	0.0	0.0	0.0	0.0	0.0	0.0	0.0	0.0	0.0	0.0	0.0	0.0	0.0	0.0	0.0	0.0	0.0
SCARNA5	677775	symbol	H. sapiens	677775	H. sapiens	SCARNA5	small Cajal body-specific RNA 5	GO:0006396 RNA processing;GO:0016070 RNA metabolic process;GO:0090304 nucleic acid metabolic process							0.0	0.0	0.0	0.0	0.0	0.0	0.0	0.0	0.0	0.0	0.0	0.0	0.0	0.0	0.0	0.0	0.0	0.0	0.0	0.0
SCARNA6	677772	symbol	H. sapiens	677772	H. sapiens	SCARNA6	small Cajal body-specific RNA 6	GO:0006396 RNA processing;GO:0016070 RNA metabolic process;GO:0090304 nucleic acid metabolic process							0.0	0.0	0.0	0.0	0.0	0.0	0.0	0.0	0.0	0.0	0.0	0.0	0.0	0.0	0.0	0.0	0.0	0.0	0.0	0.0
SCARNA7	677767	symbol	H. sapiens	677767	H. sapiens	SCARNA7	small Cajal body-specific RNA 7	GO:0006396 RNA processing;GO:0016070 RNA metabolic process;GO:0090304 nucleic acid metabolic process							0.0	0.0	0.0	0.0	0.0	0.0	0.0	0.0	0.0	0.0	0.0	0.0	0.0	0.0	0.0	0.0	0.0	0.0	0.0	0.0
SCARNA9	619383	symbol	H. sapiens	619383	H. sapiens	SCARNA9	small Cajal body-specific RNA 9	GO:0006396 RNA processing;GO:0016070 RNA metabolic process;GO:0090304 nucleic acid metabolic process							0.0	0.0	0.0	0.0	0.0	0.0	0.0	0.0	0.0	0.0	0.0	0.0	0.0	0.0	0.0	0.0	0.0	0.0	0.0	0.0
SCD5	79966	symbol	H. sapiens	79966	H. sapiens	SCD5	stearoyl-CoA desaturase 5	GO:1903966 monounsaturated fatty acid biosynthetic process;GO:1903964 monounsaturated fatty acid metabolic process;GO:0006636 unsaturated fatty acid biosynthetic process		Enzymes; ENZYME proteins:Oxidoreductases					0.0	0.0	0.0	0.0	0.0	0.0	0.0	1.0	0.0	0.0	0.0	0.0	0.0	0.0	0.0	0.0	0.0	0.0	0.0	0.0
SCG2	7857	symbol	H. sapiens	7857	H. sapiens	SCG2	secretogranin II	GO:0050930 induction of positive chemotaxis;GO:0048245 eosinophil chemotaxis;GO:0072677 eosinophil migration		Predicted secreted proteins	Golgi apparatus (Approved); Additional: Vesicles			(M5919)HALLMARK HEDGEHOG SIGNALING; (M5930)HALLMARK EPITHELIAL MESENCHYMAL TRANSITION	0.0	0.0	0.0	0.0	0.0	0.0	0.0	0.0	0.0	0.0	1.0	0.0	0.0	1.0	0.0	0.0	0.0	0.0	0.0	0.0
SCN3A	6328	symbol	H. sapiens	6328	H. sapiens	SCN3A	sodium voltage-gated channel alpha subunit 3	GO:0019228 neuronal action potential;GO:0086010 membrane depolarization during action potential;GO:0019226 transmission of nerve impulse		FDA approved drug targets:Small molecule drugs; Voltage-gated ion channels:Voltage-Gated Sodium Channels		Phenytoin; Zonisamide; Tetrodotoxin; Lacosamide			0.0	0.0	0.0	0.0	0.0	0.0	0.0	1.0	0.0	0.0	0.0	0.0	0.0	0.0	0.0	0.0	0.0	0.0	0.0	0.0
SCN5A	6331	symbol	H. sapiens	6331	H. sapiens	SCN5A	sodium voltage-gated channel alpha subunit 5	GO:0098912 membrane depolarization during atrial cardiac muscle cell action potential;GO:0086048 membrane depolarization during bundle of His cell action potential;GO:0086047 membrane depolarization during Purkinje myocyte cell action potential		Voltage-gated ion channels:Voltage-Gated Sodium Channels; Predicted intracellular proteins; FDA approved drug targets:Small molecule drugs; Disease related genes; Transporters:Transporter channels and pores	Plasma membrane (Supported); Additional: Nucleoli;Nucleoplasm	Indecainide; Phenytoin; Disopyramide; Lidocaine; Mexiletine; Hexylcaine; Cinchocaine; Mephenytoin; Moricizine; Riluzole; Prilocaine; Ethotoin; Benzonatate; Quinidine; Zonisamide; Procainamide; Tocainide; Propafenone; Flecainide; Encainide; Fosphenytoin; Quinidine barbiturate; Ajmaline; Aprindine; Dronedarone; Vernakalant; Isavuconazole			0.0	0.0	0.0	0.0	0.0	0.0	0.0	1.0	1.0	1.0	0.0	0.0	0.0	0.0	0.0	0.0	0.0	0.0	0.0	0.0
SELPLG	6404	symbol	H. sapiens	6404	H. sapiens	SELPLG	selectin P ligand	GO:0050902 leukocyte adhesive activation;GO:0050901 leukocyte tethering or rolling;GO:0071354 cellular response to interleukin-6		Candidate cardiovascular disease genes; CD markers			(M159)PID AMB2 NEUTROPHILS PATHWAY		0.0	0.0	1.0	0.0	0.0	0.0	0.0	0.0	0.0	0.0	0.0	0.0	0.0	0.0	0.0	0.0	0.0	0.0	0.0	0.0
SEMA4C	54910	symbol	H. sapiens	54910	H. sapiens	SEMA4C	semaphorin 4C	GO:0021535 cell migration in hindbrain;GO:0048843 negative regulation of axon extension involved in axon guidance;GO:0048841 regulation of axon extension involved in axon guidance		Predicted intracellular proteins			(M5880)NABA ECM AFFILIATED; (M5885)NABA MATRISOME ASSOCIATED; (M5889)NABA MATRISOME		0.0	0.0	0.0	1.0	1.0	0.0	0.0	0.0	1.0	1.0	1.0	0.0	0.0	1.0	0.0	0.0	0.0	1.0	0.0	0.0
SFXN2	118980	symbol	H. sapiens	118980	H. sapiens	SFXN2	sideroflexin 2	GO:0140300 serine import into mitochondrion;GO:0032329 serine transport;GO:0015804 neutral amino acid transport		Predicted intracellular proteins	Mitochondria (Approved)				0.0	0.0	0.0	0.0	0.0	0.0	0.0	0.0	0.0	0.0	0.0	0.0	0.0	0.0	0.0	0.0	0.0	0.0	0.0	0.0
SGSM3	27352	symbol	H. sapiens	27352	H. sapiens	SGSM3	small G protein signaling modulator 3	GO:0032483 regulation of Rab protein signal transduction;GO:0048227 plasma membrane to endosome transport;GO:0032486 Rap protein signal transduction		Predicted intracellular proteins; Transporters:Accessory Factors Involved in Transport	Golgi apparatus (Supported)				0.0	0.0	0.0	0.0	0.0	0.0	0.0	0.0	0.0	0.0	1.0	0.0	0.0	0.0	0.0	0.0	0.0	0.0	0.0	0.0
SH3BP1	23616	symbol	H. sapiens	23616	H. sapiens	SH3BP1	SH3 domain binding protein 1	GO:0045198 establishment of epithelial cell apical/basal polarity;GO:0035020 regulation of Rac protein signal transduction;GO:0035089 establishment of apical/basal cell polarity		Predicted intracellular proteins	Cytosol (Approved)				1.0	0.0	0.0	0.0	1.0	0.0	0.0	0.0	0.0	0.0	0.0	0.0	0.0	1.0	0.0	0.0	0.0	0.0	0.0	0.0
SH3BP4	23677	symbol	H. sapiens	23677	H. sapiens	SH3BP4	SH3 domain binding protein 4	GO:0034260 negative regulation of GTPase activity;GO:0032007 negative regulation of TOR signaling;GO:0061462 protein localization to lysosome		Predicted intracellular proteins					1.0	0.0	0.0	0.0	0.0	0.0	0.0	1.0	0.0	0.0	0.0	0.0	0.0	0.0	0.0	0.0	0.0	0.0	0.0	0.0
SH3TC1	54436	symbol	H. sapiens	54436	H. sapiens	SH3TC1	SH3 domain and tetratricopeptide repeats 1	GO:0008150 biological_process		Predicted intracellular proteins	Nucleoli;Nucleoli rim (Approved); Additional: Cytosol;Nucleoplasm				0.0	0.0	0.0	0.0	0.0	0.0	0.0	0.0	0.0	0.0	0.0	0.0	0.0	0.0	0.0	0.0	0.0	0.0	0.0	0.0
SHC1	6464	symbol	H. sapiens	6464	H. sapiens	SHC1	SHC adaptor protein 1	GO:0007176 regulation of epidermal growth factor-activated receptor activity;GO:0061097 regulation of protein tyrosine kinase activity;GO:0031532 actin cytoskeleton reorganization		Predicted intracellular proteins; RAS pathway related proteins	Cytosol (Enhanced)		(M12771)SA PTEN PATHWAY; (M18895)SA TRKA RECEPTOR; (M273)PID EPHA2 FWD PATHWAY	(M5922)HALLMARK UNFOLDED PROTEIN RESPONSE; (M5915)HALLMARK APICAL JUNCTION	1.0	0.0	1.0	0.0	0.0	0.0	0.0	1.0	1.0	0.0	0.0	0.0	0.0	1.0	0.0	0.0	1.0	0.0	1.0	1.0
SHISA2	387914	symbol	H. sapiens	387914	H. sapiens	SHISA2	shisa family member 2	GO:0040037 negative regulation of fibroblast growth factor receptor signaling pathway;GO:0040036 regulation of fibroblast growth factor receptor signaling pathway;GO:0008543 fibroblast growth factor receptor signaling pathway			Nucleoplasm (Approved); Additional: Nuclear bodies;Vesicles				0.0	0.0	0.0	0.0	0.0	0.0	0.0	0.0	0.0	0.0	0.0	0.0	0.0	0.0	0.0	0.0	1.0	0.0	0.0	0.0
SHROOM2	357	symbol	H. sapiens	357	H. sapiens	SHROOM2	shroom family member 2	GO:0008057 eye pigment granule organization;GO:0043476 pigment accumulation;GO:0043482 cellular pigment accumulation		Predicted intracellular proteins	Cell Junctions;Plasma membrane (Approved); Additional: Cytosol			(M5916)HALLMARK APICAL SURFACE; (M5893)HALLMARK MITOTIC SPINDLE; (M5915)HALLMARK APICAL JUNCTION	0.0	0.0	0.0	0.0	0.0	0.0	1.0	0.0	0.0	1.0	0.0	0.0	0.0	0.0	0.0	0.0	0.0	0.0	0.0	0.0
SIK1	150094	symbol	H. sapiens	150094	H. sapiens	SIK1	salt inducible kinase 1	GO:0010868 negative regulation of triglyceride biosynthetic process;GO:0032792 negative regulation of CREB transcription factor activity;GO:2000210 positive regulation of anoikis	CAMK Ser/Thr protein kinase family	ENZYME proteins:Transferases; Predicted intracellular proteins; Enzymes; Disease related genes; Kinases:CAMK Ser/Thr protein kinases; Potential drug targets	Nucleoplasm (Approved); Additional: Vesicles	Dabrafenib; Fostamatinib	(M87)PID LKB1 PATHWAY	(M5890)HALLMARK TNFA SIGNALING VIA NFKB	0.0	0.0	0.0	0.0	0.0	0.0	0.0	0.0	1.0	0.0	0.0	0.0	0.0	0.0	0.0	0.0	0.0	0.0	0.0	0.0
SIL1	64374	symbol	H. sapiens	64374	H. sapiens	SIL1	SIL1 nucleotide exchange factor	GO:0006613 cotranslational protein targeting to membrane;GO:0006612 protein targeting to membrane;GO:0006457 protein folding		Predicted intracellular proteins; Disease related genes					0.0	0.0	0.0	0.0	0.0	0.0	0.0	0.0	0.0	0.0	0.0	0.0	0.0	0.0	0.0	0.0	0.0	0.0	0.0	0.0
SLC16A12	387700	symbol	H. sapiens	387700	H. sapiens	SLC16A12	solute carrier family 16 member 12	GO:0015881 creatine transmembrane transport;GO:0072337 modified amino acid transport;GO:0150104 transport across blood-brain barrier		Predicted intracellular proteins	Mitochondria (Approved)				0.0	0.0	0.0	0.0	0.0	0.0	0.0	0.0	0.0	0.0	0.0	0.0	0.0	0.0	0.0	0.0	0.0	0.0	0.0	0.0
SLC22A17	51310	symbol	H. sapiens	51310	H. sapiens	SLC22A17	solute carrier family 22 member 17	GO:0015891 siderophore transport;GO:1901678 iron coordination entity transport;GO:0006826 iron ion transport		Transporters:Electrochemical Potential-driven transporters					0.0	0.0	0.0	0.0	0.0	0.0	0.0	0.0	0.0	0.0	0.0	0.0	0.0	0.0	0.0	0.0	0.0	0.0	0.0	0.0
SLC24A3	57419	symbol	H. sapiens	57419	H. sapiens	SLC24A3	solute carrier family 24 member 3	GO:0150104 transport across blood-brain barrier;GO:0010232 vascular transport;GO:0030282 bone mineralization		Transporters:Electrochemical Potential-driven transporters	Golgi apparatus (Approved); Additional: Cytosol			(M5906)HALLMARK ESTROGEN RESPONSE EARLY; (M5907)HALLMARK ESTROGEN RESPONSE LATE	0.0	0.0	0.0	0.0	0.0	0.0	0.0	0.0	0.0	0.0	0.0	0.0	0.0	0.0	1.0	0.0	0.0	0.0	0.0	0.0
SLC25A11	8402	symbol	H. sapiens	8402	H. sapiens	SLC25A11	solute carrier family 25 member 11	GO:0015709 thiosulfate transport;GO:0015743 malate transport;GO:0071423 malate transmembrane transport		Transporters:Electrochemical Potential-driven transporters				(M5936)HALLMARK OXIDATIVE PHOSPHORYLATION	0.0	0.0	0.0	0.0	0.0	0.0	0.0	0.0	0.0	0.0	0.0	0.0	0.0	0.0	0.0	0.0	0.0	0.0	0.0	0.0
SLC25A25	114789	symbol	H. sapiens	114789	H. sapiens	SLC25A25	solute carrier family 25 member 25	GO:0015867 ATP transport;GO:0002021 response to dietary excess;GO:0051503 adenine nucleotide transport		Predicted intracellular proteins	Mitochondria;Vesicles (Supported)				0.0	0.0	0.0	0.0	0.0	0.0	1.0	0.0	0.0	0.0	0.0	1.0	0.0	0.0	0.0	0.0	0.0	0.0	0.0	0.0
SLC25A29	123096	symbol	H. sapiens	123096	H. sapiens	SLC25A29	solute carrier family 25 member 29	GO:1990575 mitochondrial L-ornithine transmembrane transport;GO:0006844 acyl carnitine transport;GO:1902616 acyl carnitine transmembrane transport		Predicted intracellular proteins; Transporters:Electrochemical Potential-driven transporters		Levocarnitine			0.0	0.0	0.0	0.0	0.0	0.0	0.0	0.0	0.0	0.0	0.0	0.0	0.0	0.0	0.0	0.0	0.0	0.0	0.0	0.0
SLC25A42	284439	symbol	H. sapiens	284439	H. sapiens	SLC25A42	solute carrier family 25 member 42	GO:0015880 coenzyme A transport;GO:0035349 coenzyme A transmembrane transport;GO:0071106 adenosine 3',5'-bisphosphate transmembrane transport		Transporters:Electrochemical Potential-driven transporters	Mitochondria (Supported)				0.0	0.0	0.0	0.0	0.0	0.0	0.0	0.0	0.0	0.0	0.0	0.0	0.0	0.0	0.0	0.0	0.0	0.0	0.0	0.0
SLC26A6	65010	symbol	H. sapiens	65010	H. sapiens	SLC26A6	solute carrier family 26 member 6	GO:0015724 formate transport;GO:0015797 mannitol transport;GO:0046724 oxalic acid secretion		Transporters:Electrochemical Potential-driven transporters	Cytosol (Uncertain)				0.0	0.0	0.0	0.0	0.0	0.0	0.0	0.0	0.0	0.0	0.0	0.0	0.0	0.0	0.0	0.0	0.0	0.0	0.0	0.0
SLC27A5	10998	symbol	H. sapiens	10998	H. sapiens	SLC27A5	solute carrier family 27 member 5	GO:0006642 triglyceride mobilization;GO:0046951 ketone body biosynthetic process;GO:0046950 cellular ketone body metabolic process		Predicted intracellular proteins; Transporters; Enzymes; ENZYME proteins:Ligase				(M5948)HALLMARK BILE ACID METABOLISM	0.0	0.0	0.0	0.0	0.0	0.0	0.0	0.0	0.0	0.0	0.0	0.0	0.0	0.0	0.0	0.0	0.0	0.0	0.0	0.0
SLC29A2	3177	symbol	H. sapiens	3177	H. sapiens	SLC29A2	solute carrier family 29 member 2	GO:0015854 guanine transport;GO:0035344 hypoxanthine transport;GO:0035364 thymine transport		Transporters:Electrochemical Potential-driven transporters	Nucleoplasm (Uncertain)	Ethanol		(M5928)HALLMARK MYC TARGETS V2; (M5947)HALLMARK IL2 STAT5 SIGNALING	0.0	0.0	0.0	0.0	0.0	0.0	0.0	0.0	0.0	0.0	0.0	0.0	0.0	0.0	0.0	0.0	0.0	0.0	0.0	0.0
SLC29A4	222962	symbol	H. sapiens	222962	H. sapiens	SLC29A4	solute carrier family 29 member 4	GO:0051625 epinephrine uptake;GO:0051615 histamine uptake;GO:0001692 histamine metabolic process		Transporters:Electrochemical Potential-driven transporters	Cytokinetic bridge;Microtubules (Approved)	Sertraline			0.0	0.0	0.0	0.0	0.0	0.0	0.0	0.0	0.0	0.0	0.0	0.0	0.0	0.0	0.0	0.0	0.0	0.0	0.0	0.0
SLC2A1	6513	symbol	H. sapiens	6513	H. sapiens	SLC2A1	solute carrier family 2 member 1	GO:1904016 response to Thyroglobulin triiodothyronine;GO:0098708 glucose import across plasma membrane;GO:0098704 carbohydrate import across plasma membrane		Cancer-related genes:Candidate cancer biomarkers; Predicted intracellular proteins; Transporters:Electrochemical Potential-driven transporters; Disease related genes; Potential drug targets	Plasma membrane (Enhanced)	Resveratrol; Carboxymethylcellulose	(M44)PID HIF2PATHWAY; (M255)PID HIF1 TFPATHWAY; (M66)PID MYC ACTIV PATHWAY	(M5923)HALLMARK PI3K AKT MTOR SIGNALING; (M5891)HALLMARK HYPOXIA; (M5906)HALLMARK ESTROGEN RESPONSE EARLY	0.0	0.0	0.0	0.0	0.0	1.0	0.0	0.0	0.0	1.0	0.0	0.0	0.0	0.0	0.0	0.0	0.0	0.0	0.0	0.0
SLC35A2	7355	symbol	H. sapiens	7355	H. sapiens	SLC35A2	solute carrier family 35 member A2	GO:0072334 UDP-galactose transmembrane transport;GO:0006012 galactose metabolic process;GO:0090481 pyrimidine nucleotide-sugar transmembrane transport		Predicted intracellular proteins; Transporters:Electrochemical Potential-driven transporters; Potential drug targets; Disease related genes	Golgi apparatus (Supported)				0.0	0.0	0.0	0.0	0.0	0.0	0.0	0.0	0.0	0.0	0.0	0.0	0.0	0.0	0.0	0.0	0.0	0.0	0.0	0.0
SLC35F3	148641	symbol	H. sapiens	148641	H. sapiens	SLC35F3	solute carrier family 35 member F3	GO:0015888 thiamine transport;GO:0051180 vitamin transport;GO:0072348 sulfur compound transport		Transporters:Electrochemical Potential-driven transporters	Golgi apparatus (Approved); Additional: Nucleoli				0.0	0.0	0.0	0.0	0.0	0.0	0.0	0.0	0.0	0.0	0.0	0.0	0.0	0.0	0.0	0.0	0.0	0.0	0.0	0.0
SLC38A10	124565	symbol	H. sapiens	124565	H. sapiens	SLC38A10	solute carrier family 38 member 10	GO:0003333 amino acid transmembrane transport;GO:0006865 amino acid transport;GO:1905039 carboxylic acid transmembrane transport		Predicted intracellular proteins; Transporters:Electrochemical Potential-driven transporters	Golgi apparatus (Enhanced)				0.0	0.0	0.0	0.0	0.0	0.0	0.0	0.0	0.0	0.0	0.0	1.0	0.0	0.0	0.0	0.0	0.0	0.0	0.0	0.0
SLC3A2	6520	symbol	H. sapiens	6520	H. sapiens	SLC3A2	solute carrier family 3 member 2	GO:0015823 phenylalanine transport;GO:1904273 L-alanine import across plasma membrane;GO:1904557 L-alanine transmembrane transport		Cancer-related genes:Candidate cancer biomarkers; Predicted intracellular proteins; CD markers; Transporters:Accessory Factors Involved in Transport	Plasma membrane (Supported); Additional: Nucleoplasm		(M60)PID NFAT TFPATHWAY	(M5939)HALLMARK P53 PATHWAY	0.0	0.0	1.0	0.0	0.0	0.0	0.0	1.0	0.0	0.0	0.0	0.0	0.0	0.0	0.0	1.0	0.0	0.0	0.0	0.0
SLC5A6	8884	symbol	H. sapiens	8884	H. sapiens	SLC5A6	solute carrier family 5 member 6	GO:0015887 pantothenate transmembrane transport;GO:1905135 biotin import across plasma membrane;GO:1904200 iodide transmembrane transport		Predicted intracellular proteins; Transporters:Electrochemical Potential-driven transporters	Plasma membrane (Approved)	Lipoic acid		(M5905)HALLMARK ADIPOGENESIS	0.0	0.0	0.0	0.0	0.0	0.0	0.0	0.0	0.0	0.0	0.0	0.0	0.0	0.0	0.0	0.0	0.0	0.0	0.0	0.0
SLC7A2	6542	symbol	H. sapiens	6542	H. sapiens	SLC7A2	solute carrier family 7 member 2	GO:0097638 L-arginine import across plasma membrane;GO:1903352 L-ornithine transmembrane transport;GO:1902022 L-lysine transport		Transporters:Electrochemical Potential-driven transporters	Plasma membrane (Supported); Additional: Cell Junctions	L-Lysine; Ornithine		(M5906)HALLMARK ESTROGEN RESPONSE EARLY; (M5932)HALLMARK INFLAMMATORY RESPONSE	0.0	0.0	0.0	0.0	0.0	0.0	0.0	0.0	0.0	0.0	0.0	0.0	0.0	0.0	0.0	0.0	0.0	0.0	0.0	0.0
SLC7A5	8140	symbol	H. sapiens	8140	H. sapiens	SLC7A5	solute carrier family 7 member 5	GO:0015823 phenylalanine transport;GO:1904556 L-tryptophan transmembrane transport;GO:0015827 tryptophan transport		Transporters:Electrochemical Potential-driven transporters	Cytosol;Plasma membrane (Supported); Additional: Vesicles			(M5922)HALLMARK UNFOLDED PROTEIN RESPONSE; (M5901)HALLMARK G2M CHECKPOINT; (M5906)HALLMARK ESTROGEN RESPONSE EARLY	0.0	0.0	1.0	0.0	0.0	0.0	0.0	1.0	0.0	0.0	0.0	0.0	0.0	0.0	0.0	1.0	0.0	0.0	0.0	0.0
SLC7A5P1	81893	symbol	H. sapiens	81893	H. sapiens	SLC7A5P1	solute carrier family 7 member 5 pseudogene 1	GO:1902475 L-alpha-amino acid transmembrane transport;GO:0015807 L-amino acid transport;GO:0003333 amino acid transmembrane transport							0.0	0.0	0.0	0.0	0.0	0.0	0.0	0.0	0.0	0.0	0.0	0.0	0.0	0.0	0.0	0.0	0.0	0.0	0.0	0.0
SLC7A5P2	387254	symbol	H. sapiens	387254	H. sapiens	SLC7A5P2	solute carrier family 7 member 5 pseudogene 2	GO:1902475 L-alpha-amino acid transmembrane transport;GO:0015807 L-amino acid transport;GO:0003333 amino acid transmembrane transport							0.0	0.0	0.0	0.0	0.0	0.0	0.0	0.0	0.0	0.0	0.0	0.0	0.0	0.0	0.0	0.0	0.0	0.0	0.0	0.0
SLFN13	146857	symbol	H. sapiens	146857	H. sapiens	SLFN13	schlafen family member 13	GO:0016078 tRNA catabolic process;GO:0016075 rRNA catabolic process;GO:0034661 ncRNA catabolic process		Predicted intracellular proteins	Cytokinetic bridge (Approved)				0.0	0.0	0.0	0.0	0.0	0.0	0.0	0.0	0.0	0.0	0.0	0.0	0.0	0.0	0.0	0.0	0.0	0.0	0.0	0.0
SLFNL1-AS1	100507178	symbol	H. sapiens	100507178	H. sapiens	SLFNL1-AS1	SLFNL1 antisense RNA 1								0.0	0.0	0.0	0.0	0.0	0.0	0.0	0.0	0.0	0.0	0.0	0.0	0.0	0.0	0.0	0.0	0.0	0.0	0.0	0.0
SLITRK1	114798	symbol	H. sapiens	114798	H. sapiens	SLITRK1	SLIT and NTRK like family member 1	GO:0099560 synaptic membrane adhesion;GO:0099174 regulation of presynapse organization;GO:1905606 regulation of presynapse assembly		Predicted secreted proteins; Disease related genes					0.0	0.0	0.0	0.0	0.0	0.0	0.0	0.0	0.0	0.0	1.0	0.0	0.0	0.0	0.0	0.0	0.0	0.0	0.0	0.0
SMARCD3	6604	symbol	H. sapiens	6604	H. sapiens	SMARCD3	SWI/SNF related, matrix associated, actin dependent regulator of chromatin, subfamily d, member 3	GO:0003219 cardiac right ventricle formation;GO:0003211 cardiac ventricle formation;GO:0003139 secondary heart field specification		Predicted intracellular proteins	Nucleoplasm (Enhanced)		(M87)PID LKB1 PATHWAY; (M256)PID TAP63 PATHWAY		1.0	0.0	0.0	0.0	0.0	0.0	1.0	0.0	1.0	0.0	1.0	0.0	0.0	0.0	0.0	0.0	0.0	0.0	0.0	1.0
SMIM10L2B	644596	symbol	H. sapiens	644596	H. sapiens	SMIM10L2B	small integral membrane protein 10 like 2B								0.0	0.0	0.0	0.0	0.0	0.0	0.0	0.0	0.0	0.0	0.0	0.0	0.0	0.0	0.0	0.0	0.0	0.0	0.0	0.0
SMO	6608	symbol	H. sapiens	6608	H. sapiens	SMO	smoothened, frizzled class receptor	GO:0007371 ventral midline determination;GO:0072036 mesenchymal to epithelial transition involved in renal vesicle formation;GO:0072285 mesenchymal to epithelial transition involved in metanephric renal vesicle formation		Transporters; FDA approved drug targets:Small molecule drugs; Disease related genes; G-protein coupled receptors:GPCRs excl olfactory receptors; Cancer-related genes; G-protein coupled receptors:Family fz/smo receptors		Fluocinonide; Halcinonide; Vismodegib; Sonidegib; Glasdegib	(M211)PID HEDGEHOG 2PATHWAY; (M219)PID HEDGEHOG GLI PATHWAY		0.0	0.0	0.0	1.0	1.0	1.0	0.0	0.0	1.0	1.0	1.0	0.0	0.0	1.0	1.0	1.0	0.0	1.0	1.0	1.0
SND1-IT1	27099	symbol	H. sapiens	27099	H. sapiens	SND1-IT1	SND1 intronic transcript 1								0.0	0.0	0.0	0.0	0.0	0.0	0.0	0.0	0.0	0.0	0.0	0.0	0.0	0.0	0.0	0.0	0.0	0.0	0.0	0.0
SNHG16	100507246	symbol	H. sapiens	100507246	H. sapiens	SNHG16	small nucleolar RNA host gene 16								0.0	0.0	0.0	0.0	0.0	0.0	0.0	0.0	0.0	0.0	0.0	0.0	0.0	0.0	0.0	0.0	0.0	0.0	0.0	0.0
SNHG24	79104	gene_synonym	H. sapiens	79104	H. sapiens	MEG8	maternally expressed 8, small nucleolar RNA host gene								0.0	0.0	0.0	0.0	0.0	0.0	0.0	0.0	0.0	0.0	0.0	0.0	0.0	0.0	0.0	0.0	0.0	0.0	0.0	0.0
SNORA10	574042	symbol	H. sapiens	574042	H. sapiens	SNORA10	small nucleolar RNA, H/ACA box 10	GO:0006396 RNA processing;GO:0016070 RNA metabolic process;GO:0090304 nucleic acid metabolic process							0.0	0.0	0.0	0.0	0.0	0.0	0.0	0.0	0.0	0.0	0.0	0.0	0.0	0.0	0.0	0.0	0.0	0.0	0.0	0.0
SNORA12	677800	symbol	H. sapiens	677800	H. sapiens	SNORA12	small nucleolar RNA, H/ACA box 12	GO:0006396 RNA processing;GO:0016070 RNA metabolic process;GO:0090304 nucleic acid metabolic process							0.0	0.0	0.0	0.0	0.0	0.0	0.0	0.0	0.0	0.0	0.0	0.0	0.0	0.0	0.0	0.0	0.0	0.0	0.0	0.0
SNORA16A	692073	symbol	H. sapiens	692073	H. sapiens	SNORA16A	small nucleolar RNA, H/ACA box 16A	GO:0006396 RNA processing;GO:0016070 RNA metabolic process;GO:0090304 nucleic acid metabolic process							0.0	0.0	0.0	0.0	0.0	0.0	0.0	0.0	0.0	0.0	0.0	0.0	0.0	0.0	0.0	0.0	0.0	0.0	0.0	0.0
SNORA20	677806	symbol	H. sapiens	677806	H. sapiens	SNORA20	small nucleolar RNA, H/ACA box 20	GO:0006396 RNA processing;GO:0016070 RNA metabolic process;GO:0090304 nucleic acid metabolic process							0.0	0.0	0.0	0.0	0.0	0.0	0.0	0.0	0.0	0.0	0.0	0.0	0.0	0.0	0.0	0.0	0.0	0.0	0.0	0.0
SNORA21	619505	symbol	H. sapiens	619505	H. sapiens	SNORA21	small nucleolar RNA, H/ACA box 21	GO:0006396 RNA processing;GO:0016070 RNA metabolic process;GO:0090304 nucleic acid metabolic process							0.0	0.0	0.0	0.0	0.0	0.0	0.0	0.0	0.0	0.0	0.0	0.0	0.0	0.0	0.0	0.0	0.0	0.0	0.0	0.0
SNORA22	677807	symbol	H. sapiens	677807	H. sapiens	SNORA22	small nucleolar RNA, H/ACA box 22	GO:0006396 RNA processing;GO:0016070 RNA metabolic process;GO:0090304 nucleic acid metabolic process							0.0	0.0	0.0	0.0	0.0	0.0	0.0	0.0	0.0	0.0	0.0	0.0	0.0	0.0	0.0	0.0	0.0	0.0	0.0	0.0
SNORA23	677808	symbol	H. sapiens	677808	H. sapiens	SNORA23	small nucleolar RNA, H/ACA box 23	GO:0006396 RNA processing;GO:0016070 RNA metabolic process;GO:0090304 nucleic acid metabolic process							0.0	0.0	0.0	0.0	0.0	0.0	0.0	0.0	0.0	0.0	0.0	0.0	0.0	0.0	0.0	0.0	0.0	0.0	0.0	0.0
SNORA24	677809	symbol	H. sapiens	677809	H. sapiens	SNORA24	small nucleolar RNA, H/ACA box 24	GO:0006396 RNA processing;GO:0016070 RNA metabolic process;GO:0090304 nucleic acid metabolic process							0.0	0.0	0.0	0.0	0.0	0.0	0.0	0.0	0.0	0.0	0.0	0.0	0.0	0.0	0.0	0.0	0.0	0.0	0.0	0.0
SNORA34	677815	gene_synonym	H. sapiens	677815	H. sapiens	SNORA2C	small nucleolar RNA, H/ACA box 2C	GO:0006396 RNA processing;GO:0016070 RNA metabolic process;GO:0090304 nucleic acid metabolic process							0.0	0.0	0.0	0.0	0.0	0.0	0.0	0.0	0.0	0.0	0.0	0.0	0.0	0.0	0.0	0.0	0.0	0.0	0.0	0.0
SNORA38	677820	symbol	H. sapiens	677820	H. sapiens	SNORA38	small nucleolar RNA, H/ACA box 38	GO:0006396 RNA processing;GO:0016070 RNA metabolic process;GO:0090304 nucleic acid metabolic process							0.0	0.0	0.0	0.0	0.0	0.0	0.0	0.0	0.0	0.0	0.0	0.0	0.0	0.0	0.0	0.0	0.0	0.0	0.0	0.0
SNORA44	677825	symbol	H. sapiens	677825	H. sapiens	SNORA44	small nucleolar RNA, H/ACA box 44	GO:0006396 RNA processing;GO:0016070 RNA metabolic process;GO:0090304 nucleic acid metabolic process							0.0	0.0	0.0	0.0	0.0	0.0	0.0	0.0	0.0	0.0	0.0	0.0	0.0	0.0	0.0	0.0	0.0	0.0	0.0	0.0
SNORA45A	619562	gene_synonym	H. sapiens	619562	H. sapiens	SNORA3A	small nucleolar RNA, H/ACA box 3A	GO:0006396 RNA processing;GO:0016070 RNA metabolic process;GO:0090304 nucleic acid metabolic process							0.0	0.0	0.0	0.0	0.0	0.0	0.0	0.0	0.0	0.0	0.0	0.0	0.0	0.0	0.0	0.0	0.0	0.0	0.0	0.0
SNORA48	652965	symbol	H. sapiens	652965	H. sapiens	SNORA48	small nucleolar RNA, H/ACA box 48	GO:0006396 RNA processing;GO:0016070 RNA metabolic process;GO:0090304 nucleic acid metabolic process							0.0	0.0	0.0	0.0	0.0	0.0	0.0	0.0	0.0	0.0	0.0	0.0	0.0	0.0	0.0	0.0	0.0	0.0	0.0	0.0
SNORA49	677829	symbol	H. sapiens	677829	H. sapiens	SNORA49	small nucleolar RNA, H/ACA box 49	GO:0006396 RNA processing;GO:0016070 RNA metabolic process;GO:0090304 nucleic acid metabolic process							0.0	0.0	0.0	0.0	0.0	0.0	0.0	0.0	0.0	0.0	0.0	0.0	0.0	0.0	0.0	0.0	0.0	0.0	0.0	0.0
SNORA52	619565	symbol	H. sapiens	619565	H. sapiens	SNORA52	small nucleolar RNA, H/ACA box 52	GO:0006396 RNA processing;GO:0016070 RNA metabolic process;GO:0090304 nucleic acid metabolic process							0.0	0.0	0.0	0.0	0.0	0.0	0.0	0.0	0.0	0.0	0.0	0.0	0.0	0.0	0.0	0.0	0.0	0.0	0.0	0.0
SNORA53	677832	symbol	H. sapiens	677832	H. sapiens	SNORA53	small nucleolar RNA, H/ACA box 53	GO:0006396 RNA processing;GO:0016070 RNA metabolic process;GO:0090304 nucleic acid metabolic process							0.0	0.0	0.0	0.0	0.0	0.0	0.0	0.0	0.0	0.0	0.0	0.0	0.0	0.0	0.0	0.0	0.0	0.0	0.0	0.0
SNORA54	677833	symbol	H. sapiens	677833	H. sapiens	SNORA54	small nucleolar RNA, H/ACA box 54	GO:0006396 RNA processing;GO:0016070 RNA metabolic process;GO:0090304 nucleic acid metabolic process							0.0	0.0	0.0	0.0	0.0	0.0	0.0	0.0	0.0	0.0	0.0	0.0	0.0	0.0	0.0	0.0	0.0	0.0	0.0	0.0
SNORA57	692158	symbol	H. sapiens	692158	H. sapiens	SNORA57	small nucleolar RNA, H/ACA box 57	GO:0006396 RNA processing;GO:0016070 RNA metabolic process;GO:0090304 nucleic acid metabolic process							0.0	0.0	0.0	0.0	0.0	0.0	0.0	0.0	0.0	0.0	0.0	0.0	0.0	0.0	0.0	0.0	0.0	0.0	0.0	0.0
SNORA63	6043	symbol	H. sapiens	6043	H. sapiens	SNORA63	small nucleolar RNA, H/ACA box 63	GO:0006396 RNA processing;GO:0016070 RNA metabolic process;GO:0090304 nucleic acid metabolic process							0.0	0.0	0.0	0.0	0.0	0.0	0.0	0.0	0.0	0.0	0.0	0.0	0.0	0.0	0.0	0.0	0.0	0.0	0.0	0.0
SNORA64	26784	symbol	H. sapiens	26784	H. sapiens	SNORA64	small nucleolar RNA, H/ACA box 64	GO:0006396 RNA processing;GO:0016070 RNA metabolic process;GO:0090304 nucleic acid metabolic process							0.0	0.0	0.0	0.0	0.0	0.0	0.0	0.0	0.0	0.0	0.0	0.0	0.0	0.0	0.0	0.0	0.0	0.0	0.0	0.0
SNORA67	26781	symbol	H. sapiens	26781	H. sapiens	SNORA67	small nucleolar RNA, H/ACA box 67	GO:0006396 RNA processing;GO:0016070 RNA metabolic process;GO:0090304 nucleic acid metabolic process							0.0	0.0	0.0	0.0	0.0	0.0	0.0	0.0	0.0	0.0	0.0	0.0	0.0	0.0	0.0	0.0	0.0	0.0	0.0	0.0
SNORA68	26780	symbol	H. sapiens	26780	H. sapiens	SNORA68	small nucleolar RNA, H/ACA box 68	GO:0006396 RNA processing;GO:0016070 RNA metabolic process;GO:0090304 nucleic acid metabolic process							0.0	0.0	0.0	0.0	0.0	0.0	0.0	0.0	0.0	0.0	0.0	0.0	0.0	0.0	0.0	0.0	0.0	0.0	0.0	0.0
SNORA70	26778	symbol	H. sapiens	26778	H. sapiens	SNORA70	small nucleolar RNA, H/ACA box 70	GO:0006396 RNA processing;GO:0016070 RNA metabolic process;GO:0090304 nucleic acid metabolic process							0.0	0.0	0.0	0.0	0.0	0.0	0.0	0.0	0.0	0.0	0.0	0.0	0.0	0.0	0.0	0.0	0.0	0.0	0.0	0.0
SNORA71A	26777	symbol	H. sapiens	26777	H. sapiens	SNORA71A	small nucleolar RNA, H/ACA box 71A	GO:0006396 RNA processing;GO:0016070 RNA metabolic process;GO:0090304 nucleic acid metabolic process							0.0	0.0	0.0	0.0	0.0	0.0	0.0	0.0	0.0	0.0	0.0	0.0	0.0	0.0	0.0	0.0	0.0	0.0	0.0	0.0
SNORA71C	677839	symbol	H. sapiens	677839	H. sapiens	SNORA71C	small nucleolar RNA, H/ACA box 71C	GO:0006396 RNA processing;GO:0016070 RNA metabolic process;GO:0090304 nucleic acid metabolic process							0.0	0.0	0.0	0.0	0.0	0.0	0.0	0.0	0.0	0.0	0.0	0.0	0.0	0.0	0.0	0.0	0.0	0.0	0.0	0.0
SNORA71D	677840	symbol	H. sapiens	677840	H. sapiens	SNORA71D	small nucleolar RNA, H/ACA box 71D	GO:0006396 RNA processing;GO:0016070 RNA metabolic process;GO:0090304 nucleic acid metabolic process							0.0	0.0	0.0	0.0	0.0	0.0	0.0	0.0	0.0	0.0	0.0	0.0	0.0	0.0	0.0	0.0	0.0	0.0	0.0	0.0
SNORA73B	26768	symbol	H. sapiens	26768	H. sapiens	SNORA73B	small nucleolar RNA, H/ACA box 73B	GO:0006396 RNA processing;GO:0016070 RNA metabolic process;GO:0090304 nucleic acid metabolic process							0.0	0.0	0.0	0.0	0.0	0.0	0.0	0.0	0.0	0.0	0.0	0.0	0.0	0.0	0.0	0.0	0.0	0.0	0.0	0.0
SNORA76C	677842	gene_synonym	H. sapiens	677842	H. sapiens	SNORA50C	small nucleolar RNA, H/ACA box 50C	GO:0006396 RNA processing;GO:0016070 RNA metabolic process;GO:0090304 nucleic acid metabolic process							0.0	0.0	0.0	0.0	0.0	0.0	0.0	0.0	0.0	0.0	0.0	0.0	0.0	0.0	0.0	0.0	0.0	0.0	0.0	0.0
SNORA7B	677797	symbol	H. sapiens	677797	H. sapiens	SNORA7B	small nucleolar RNA, H/ACA box 7B	GO:0006396 RNA processing;GO:0016070 RNA metabolic process;GO:0090304 nucleic acid metabolic process							0.0	0.0	0.0	0.0	0.0	0.0	0.0	0.0	0.0	0.0	0.0	0.0	0.0	0.0	0.0	0.0	0.0	0.0	0.0	0.0
SNORA8	654320	symbol	H. sapiens	654320	H. sapiens	SNORA8	small nucleolar RNA, H/ACA box 8	GO:0006396 RNA processing;GO:0016070 RNA metabolic process;GO:0090304 nucleic acid metabolic process							0.0	0.0	0.0	0.0	0.0	0.0	0.0	0.0	0.0	0.0	0.0	0.0	0.0	0.0	0.0	0.0	0.0	0.0	0.0	0.0
SNORA80A	677846	symbol	H. sapiens	677846	H. sapiens	SNORA80A	small nucleolar RNA, H/ACA box 80A	GO:0006396 RNA processing;GO:0016070 RNA metabolic process;GO:0090304 nucleic acid metabolic process							0.0	0.0	0.0	0.0	0.0	0.0	0.0	0.0	0.0	0.0	0.0	0.0	0.0	0.0	0.0	0.0	0.0	0.0	0.0	0.0
SNORA84	100124534	symbol	H. sapiens	100124534	H. sapiens	SNORA84	small nucleolar RNA, H/ACA box 84	GO:0006396 RNA processing;GO:0016070 RNA metabolic process;GO:0090304 nucleic acid metabolic process							0.0	0.0	0.0	0.0	0.0	0.0	0.0	0.0	0.0	0.0	0.0	0.0	0.0	0.0	0.0	0.0	0.0	0.0	0.0	0.0
SNORA9	677798	symbol	H. sapiens	677798	H. sapiens	SNORA9	small nucleolar RNA, H/ACA box 9	GO:0006396 RNA processing;GO:0016070 RNA metabolic process;GO:0090304 nucleic acid metabolic process							0.0	0.0	0.0	0.0	0.0	0.0	0.0	0.0	0.0	0.0	0.0	0.0	0.0	0.0	0.0	0.0	0.0	0.0	0.0	0.0
SNORD10	652966	symbol	H. sapiens	652966	H. sapiens	SNORD10	small nucleolar RNA, C/D box 10	GO:0006396 RNA processing;GO:0016070 RNA metabolic process;GO:0090304 nucleic acid metabolic process							0.0	0.0	0.0	0.0	0.0	0.0	0.0	0.0	0.0	0.0	0.0	0.0	0.0	0.0	0.0	0.0	0.0	0.0	0.0	0.0
SNORD15B	114599	symbol	H. sapiens	114599	H. sapiens	SNORD15B	small nucleolar RNA, C/D box 15B	GO:0006396 RNA processing;GO:0016070 RNA metabolic process;GO:0090304 nucleic acid metabolic process							0.0	0.0	0.0	0.0	0.0	0.0	0.0	0.0	0.0	0.0	0.0	0.0	0.0	0.0	0.0	0.0	0.0	0.0	0.0	0.0
SNORD17	692086	symbol	H. sapiens	692086	H. sapiens	SNORD17	small nucleolar RNA, C/D box 17	GO:0006396 RNA processing;GO:0016070 RNA metabolic process;GO:0090304 nucleic acid metabolic process							0.0	0.0	0.0	0.0	0.0	0.0	0.0	0.0	0.0	0.0	0.0	0.0	0.0	0.0	0.0	0.0	0.0	0.0	0.0	0.0
SNORD32A	26819	symbol	H. sapiens	26819	H. sapiens	SNORD32A	small nucleolar RNA, C/D box 32A	GO:0006396 RNA processing;GO:0016070 RNA metabolic process;GO:0090304 nucleic acid metabolic process							0.0	0.0	0.0	0.0	0.0	0.0	0.0	0.0	0.0	0.0	0.0	0.0	0.0	0.0	0.0	0.0	0.0	0.0	0.0	0.0
SNORD33	26818	symbol	H. sapiens	26818	H. sapiens	SNORD33	small nucleolar RNA, C/D box 33	GO:0006396 RNA processing;GO:0016070 RNA metabolic process;GO:0090304 nucleic acid metabolic process							0.0	0.0	0.0	0.0	0.0	0.0	0.0	0.0	0.0	0.0	0.0	0.0	0.0	0.0	0.0	0.0	0.0	0.0	0.0	0.0
SNORD46	94161	symbol	H. sapiens	94161	H. sapiens	SNORD46	small nucleolar RNA, C/D box 46	GO:0006396 RNA processing;GO:0016070 RNA metabolic process;GO:0090304 nucleic acid metabolic process							0.0	0.0	0.0	0.0	0.0	0.0	0.0	0.0	0.0	0.0	0.0	0.0	0.0	0.0	0.0	0.0	0.0	0.0	0.0	0.0
SNORD89	692205	symbol	H. sapiens	692205	H. sapiens	SNORD89	small nucleolar RNA, C/D box 89	GO:0006396 RNA processing;GO:0016070 RNA metabolic process;GO:0090304 nucleic acid metabolic process							0.0	0.0	0.0	0.0	0.0	0.0	0.0	0.0	0.0	0.0	0.0	0.0	0.0	0.0	0.0	0.0	0.0	0.0	0.0	0.0
SNORD94	692225	symbol	H. sapiens	692225	H. sapiens	SNORD94	small nucleolar RNA, C/D box 94	GO:0006396 RNA processing;GO:0016070 RNA metabolic process;GO:0090304 nucleic acid metabolic process							0.0	0.0	0.0	0.0	0.0	0.0	0.0	0.0	0.0	0.0	0.0	0.0	0.0	0.0	0.0	0.0	0.0	0.0	0.0	0.0
SNORD97	692223	symbol	H. sapiens	692223	H. sapiens	SNORD97	small nucleolar RNA, C/D box 97	GO:0006396 RNA processing;GO:0016070 RNA metabolic process;GO:0090304 nucleic acid metabolic process							0.0	0.0	0.0	0.0	0.0	0.0	0.0	0.0	0.0	0.0	0.0	0.0	0.0	0.0	0.0	0.0	0.0	0.0	0.0	0.0
SNRPD2	6633	symbol	H. sapiens	6633	H. sapiens	SNRPD2	small nuclear ribonucleoprotein D2 polypeptide	GO:0000387 spliceosomal snRNP assembly;GO:0000245 spliceosomal complex assembly;GO:0022618 ribonucleoprotein complex assembly		Predicted intracellular proteins	Cytosol (Supported)	Artenimol		(M5926)HALLMARK MYC TARGETS V1	0.0	0.0	0.0	0.0	0.0	0.0	0.0	1.0	0.0	0.0	0.0	0.0	0.0	0.0	0.0	0.0	0.0	0.0	0.0	0.0
SNRPG	6637	symbol	H. sapiens	6637	H. sapiens	SNRPG	small nuclear ribonucleoprotein polypeptide G	GO:0000387 spliceosomal snRNP assembly;GO:0000245 spliceosomal complex assembly;GO:0022618 ribonucleoprotein complex assembly		Predicted intracellular proteins	Nucleoplasm (Approved)			(M5926)HALLMARK MYC TARGETS V1	0.0	0.0	0.0	0.0	0.0	0.0	0.0	1.0	0.0	0.0	0.0	0.0	0.0	0.0	0.0	0.0	0.0	0.0	0.0	0.0
SOBP	55084	symbol	H. sapiens	55084	H. sapiens	SOBP	sine oculis binding protein homolog	GO:0090102 cochlea development;GO:0042472 inner ear morphogenesis;GO:0042471 ear morphogenesis		Predicted intracellular proteins; Disease related genes	Nucleoplasm (Approved); Additional: Vesicles				0.0	0.0	0.0	0.0	1.0	0.0	1.0	0.0	0.0	0.0	0.0	0.0	0.0	0.0	0.0	0.0	0.0	0.0	0.0	0.0
SOCS3	9021	symbol	H. sapiens	9021	H. sapiens	SOCS3	suppressor of cytokine signaling 3	GO:0060670 branching involved in labyrinthine layer morphogenesis;GO:0060707 trophoblast giant cell differentiation;GO:0042532 negative regulation of tyrosine phosphorylation of STAT protein		Predicted intracellular proteins; Disease related genes	Cytosol (Approved); Additional: Plasma membrane		(M233)PID EPO PATHWAY; (M196)PID IL23 PATHWAY; (M183)PID IL6 7 PATHWAY	(M5897)HALLMARK IL6 JAK STAT3 SIGNALING; (M5890)HALLMARK TNFA SIGNALING VIA NFKB; (M5913)HALLMARK INTERFERON GAMMA RESPONSE	1.0	0.0	1.0	0.0	1.0	0.0	0.0	0.0	0.0	0.0	0.0	0.0	0.0	1.0	0.0	0.0	1.0	0.0	0.0	1.0
SOX11	6664	symbol	H. sapiens	6664	H. sapiens	SOX11	SRY-box transcription factor 11	GO:0097166 lens epithelial cell proliferation;GO:2001109 regulation of lens epithelial cell proliferation;GO:2001111 positive regulation of lens epithelial cell proliferation		Predicted intracellular proteins; Transcription factors:Other all-alpha-helical DNA-binding domains; Disease related genes	Nucleoplasm (Supported); Additional: Plasma membrane				0.0	0.0	0.0	1.0	1.0	0.0	1.0	0.0	1.0	0.0	1.0	1.0	0.0	0.0	1.0	0.0	0.0	1.0	0.0	0.0
SOX18	54345	symbol	H. sapiens	54345	H. sapiens	SOX18	SRY-box transcription factor 18	GO:0060214 endocardium formation;GO:0048866 stem cell fate specification;GO:0003348 cardiac endothelial cell differentiation		Predicted intracellular proteins; Transcription factors:Other all-alpha-helical DNA-binding domains; Disease related genes	Nucleoplasm (Approved)				0.0	0.0	0.0	0.0	1.0	0.0	0.0	0.0	1.0	0.0	0.0	0.0	0.0	1.0	0.0	0.0	0.0	1.0	0.0	0.0
SOX2	6657	symbol	H. sapiens	6657	H. sapiens	SOX2	SRY-box transcription factor 2	GO:0001714 endodermal cell fate specification;GO:0021781 glial cell fate commitment;GO:0021984 adenohypophysis development		Predicted intracellular proteins; Disease related genes; Transcription factors:Other all-alpha-helical DNA-binding domains; Cancer-related genes	Nucleoplasm (Enhanced)				1.0	0.0	1.0	1.0	1.0	0.0	1.0	0.0	0.0	1.0	0.0	0.0	0.0	0.0	1.0	1.0	0.0	0.0	0.0	0.0
SOX6	55553	symbol	H. sapiens	55553	H. sapiens	SOX6	SRY-box transcription factor 6	GO:2000741 positive regulation of mesenchymal stem cell differentiation;GO:0021529 spinal cord oligodendrocyte cell differentiation;GO:2000739 regulation of mesenchymal stem cell differentiation		Predicted intracellular proteins; Transcription factors:Other all-alpha-helical DNA-binding domains	Nucleoplasm (Supported)				1.0	0.0	0.0	1.0	0.0	0.0	0.0	0.0	1.0	1.0	0.0	1.0	0.0	0.0	0.0	0.0	0.0	1.0	0.0	0.0
SPINT1	6692	symbol	H. sapiens	6692	H. sapiens	SPINT1	serine peptidase inhibitor, Kunitz type 1	GO:0060670 branching involved in labyrinthine layer morphogenesis;GO:2000178 negative regulation of neural precursor cell proliferation;GO:0060713 labyrinthine layer morphogenesis		Cancer-related genes:Candidate cancer biomarkers; Predicted intracellular proteins; Predicted secreted proteins	Cytosol;Plasma membrane (Supported); Additional: Nucleoplasm				0.0	0.0	1.0	0.0	1.0	0.0	0.0	0.0	0.0	0.0	1.0	0.0	0.0	1.0	0.0	0.0	1.0	0.0	0.0	0.0
SPSB4	92369	symbol	H. sapiens	92369	H. sapiens	SPSB4	splA/ryanodine receptor domain and SOCS box containing 4	GO:1902916 positive regulation of protein polyubiquitination;GO:1902914 regulation of protein polyubiquitination;GO:0031398 positive regulation of protein ubiquitination		Predicted intracellular proteins	Golgi apparatus;Nucleoplasm (Approved)				0.0	0.0	0.0	0.0	0.0	0.0	0.0	0.0	0.0	0.0	0.0	0.0	0.0	0.0	0.0	0.0	0.0	0.0	0.0	1.0
SRA1	10011	symbol	H. sapiens	10011	H. sapiens	SRA1	steroid receptor RNA activator 1	GO:0071391 cellular response to estrogen stimulus;GO:0045662 negative regulation of myoblast differentiation;GO:0045661 regulation of myoblast differentiation		Predicted intracellular proteins	Nucleoplasm (Supported); Additional: Cytosol;Microtubules		(M200)PID ERA GENOMIC PATHWAY		0.0	0.0	0.0	1.0	0.0	0.0	0.0	0.0	1.0	0.0	0.0	0.0	0.0	0.0	0.0	0.0	0.0	0.0	0.0	0.0
SREBF1	6720	symbol	H. sapiens	6720	H. sapiens	SREBF1	sterol regulatory element binding transcription factor 1	GO:0003062 regulation of heart rate by chemical signal;GO:0045542 positive regulation of cholesterol biosynthetic process;GO:0106120 positive regulation of sterol biosynthetic process		Predicted intracellular proteins; Transcription factors:Basic domains	Cytosol;Golgi apparatus;Nucleoplasm (Supported)	Doconexent; Omega-3-acid ethyl esters; Omega-3 fatty acids; Fish oil	(M7997)SA CASPASE CASCADE; (M162)PID RXR VDR PATHWAY; (M220)PID CASPASE PATHWAY		1.0	0.0	1.0	0.0	0.0	0.0	0.0	0.0	0.0	0.0	0.0	0.0	0.0	0.0	0.0	0.0	1.0	0.0	0.0	0.0
SRF	6722	symbol	H. sapiens	6722	H. sapiens	SRF	serum response factor	GO:0060532 bronchus cartilage development;GO:0061145 lung smooth muscle development;GO:0010735 positive regulation of transcription via serum response element binding		Transcription factors:alpha-Helices exposed by beta-structures; Predicted intracellular proteins	Nucleoplasm (Supported)		(M199)PID P38 MK2 PATHWAY; (M206)PID PDGFRA PATHWAY; (M30)PID HDAC CLASSII PATHWAY	(M5908)HALLMARK ANDROGEN RESPONSE	1.0	0.0	0.0	0.0	1.0	1.0	1.0	0.0	1.0	1.0	1.0	1.0	0.0	1.0	0.0	0.0	1.0	1.0	0.0	0.0
SRSF9	8683	symbol	H. sapiens	8683	H. sapiens	SRSF9	serine and arginine rich splicing factor 9	GO:0048025 negative regulation of mRNA splicing, via spliceosome;GO:0033119 negative regulation of RNA splicing;GO:0050686 negative regulation of mRNA processing		Predicted intracellular proteins	Nucleoplasm (Supported); Additional: Nucleoli				0.0	0.0	0.0	0.0	0.0	0.0	0.0	1.0	0.0	0.0	0.0	0.0	0.0	0.0	0.0	0.0	0.0	0.0	0.0	0.0
ST3GAL2	6483	symbol	H. sapiens	6483	H. sapiens	ST3GAL2	ST3 beta-galactoside alpha-2,3-sialyltransferase 2	GO:0010707 globoside biosynthetic process via lactosylceramide;GO:0001575 globoside metabolic process;GO:0001576 globoside biosynthetic process		ENZYME proteins:Transferases; Enzymes	Vesicles (Approved)				0.0	0.0	0.0	0.0	0.0	0.0	0.0	0.0	0.0	0.0	0.0	0.0	0.0	0.0	0.0	0.0	0.0	0.0	0.0	0.0
ST3GAL5	8869	symbol	H. sapiens	8869	H. sapiens	ST3GAL5	ST3 beta-galactoside alpha-2,3-sialyltransferase 5	GO:0001574 ganglioside biosynthetic process;GO:0097503 sialylation;GO:0001573 ganglioside metabolic process		ENZYME proteins:Transferases; Predicted intracellular proteins; Enzymes; Disease related genes; Potential drug targets	Vesicles (Approved)	99mTc-14 F7 Mab		(M5913)HALLMARK INTERFERON GAMMA RESPONSE	0.0	0.0	0.0	0.0	0.0	0.0	0.0	0.0	0.0	0.0	0.0	0.0	0.0	0.0	0.0	0.0	0.0	0.0	0.0	0.0
ST6GAL2	84620	symbol	H. sapiens	84620	H. sapiens	ST6GAL2	ST6 beta-galactoside alpha-2,6-sialyltransferase 2	GO:0097503 sialylation;GO:0009311 oligosaccharide metabolic process;GO:0006486 protein glycosylation		ENZYME proteins:Transferases; Predicted intracellular proteins; Enzymes	Nucleoli fibrillar center (Approved); Additional: Nucleoplasm				0.0	0.0	0.0	0.0	0.0	0.0	0.0	0.0	0.0	0.0	0.0	0.0	0.0	0.0	0.0	0.0	0.0	0.0	0.0	0.0
ST7-AS1	93653	symbol	H. sapiens	93653	H. sapiens	ST7-AS1	ST7 antisense RNA 1								0.0	0.0	0.0	0.0	0.0	0.0	0.0	0.0	0.0	0.0	0.0	0.0	0.0	0.0	0.0	0.0	0.0	0.0	0.0	0.0
STAG3L3	442578	symbol	H. sapiens	442578	H. sapiens	STAG3L3	stromal antigen 3-like 3 (pseudogene)	GO:0007062 sister chromatid cohesion;GO:0000819 sister chromatid segregation;GO:0098813 nuclear chromosome segregation							0.0	0.0	0.0	0.0	0.0	0.0	0.0	0.0	0.0	0.0	0.0	0.0	0.0	0.0	0.0	0.0	0.0	0.0	0.0	0.0
STK33	65975	symbol	H. sapiens	65975	H. sapiens	STK33	serine/threonine kinase 33	GO:0044773 mitotic DNA damage checkpoint signaling;GO:0044774 mitotic DNA integrity checkpoint signaling;GO:0000077 DNA damage checkpoint signaling	CAMK Ser/Thr protein kinase family	ENZYME proteins:Transferases; Kinases:CAMK Ser/Thr protein kinases; Enzymes; Predicted intracellular proteins	Nucleoplasm (Approved); Additional: Cytosol;Nucleoli	Fostamatinib			0.0	0.0	0.0	0.0	0.0	0.0	0.0	0.0	0.0	0.0	0.0	0.0	0.0	0.0	0.0	0.0	0.0	0.0	0.0	0.0
STX10	8677	symbol	H. sapiens	8677	H. sapiens	STX10	syntaxin 10	GO:0034498 early endosome to Golgi transport;GO:0048278 vesicle docking;GO:0140056 organelle localization by membrane tethering		Predicted intracellular proteins	Golgi apparatus (Approved)				0.0	0.0	0.0	0.0	0.0	0.0	0.0	0.0	0.0	0.0	0.0	0.0	0.0	0.0	0.0	0.0	0.0	0.0	0.0	0.0
SUSD2	56241	symbol	H. sapiens	56241	H. sapiens	SUSD2	sushi domain containing 2	GO:0051782 negative regulation of cell division;GO:1902807 negative regulation of cell cycle G1/S phase transition;GO:1902806 regulation of cell cycle G1/S phase transition			Plasma membrane (Approved)				0.0	0.0	0.0	0.0	0.0	0.0	0.0	0.0	0.0	0.0	0.0	0.0	0.0	0.0	0.0	0.0	0.0	0.0	0.0	0.0
SUSD5	26032	symbol	H. sapiens	26032	H. sapiens	SUSD5	sushi domain containing 5	GO:0007219 Notch signaling pathway;GO:0007155 cell adhesion;GO:0022610 biological adhesion		Predicted intracellular proteins	Golgi apparatus;Vesicles (Uncertain)				0.0	0.0	0.0	0.0	0.0	0.0	0.0	0.0	0.0	0.0	0.0	0.0	0.0	0.0	0.0	0.0	0.0	0.0	0.0	0.0
SUV420H2	84787	gene_synonym	H. sapiens	84787	H. sapiens	KMT5C	lysine methyltransferase 5C	GO:0034772 histone H4-K20 dimethylation;GO:0034773 histone H4-K20 trimethylation;GO:0034770 histone H4-K20 methylation		ENZYME proteins:Transferases; Predicted intracellular proteins; Enzymes	Nucleoplasm (Approved)				1.0	0.0	0.0	0.0	0.0	0.0	0.0	0.0	0.0	0.0	0.0	0.0	0.0	0.0	0.0	0.0	0.0	0.0	0.0	0.0
SWI5	375757	symbol	H. sapiens	375757	H. sapiens	SWI5	SWI5 homologous recombination repair protein	GO:0071479 cellular response to ionizing radiation;GO:0000724 double-strand break repair via homologous recombination;GO:0000725 recombinational repair		Predicted intracellular proteins	Cytosol;Nucleoplasm (Supported)				0.0	0.0	0.0	0.0	0.0	0.0	0.0	0.0	0.0	0.0	0.0	0.0	0.0	0.0	0.0	0.0	0.0	0.0	0.0	0.0
SYDE2	84144	symbol	H. sapiens	84144	H. sapiens	SYDE2	synapse defective Rho GTPase homolog 2	GO:0090630 activation of GTPase activity;GO:0043547 positive regulation of GTPase activity;GO:0051056 regulation of small GTPase mediated signal transduction		Predicted intracellular proteins	Golgi apparatus;Nucleoli;Nucleoli rim (Approved)				1.0	0.0	0.0	0.0	0.0	0.0	0.0	0.0	0.0	0.0	0.0	0.0	0.0	0.0	0.0	0.0	0.0	0.0	0.0	0.0
SYN1	6853	symbol	H. sapiens	6853	H. sapiens	SYN1	synapsin I	GO:0098693 regulation of synaptic vesicle cycle;GO:0097091 synaptic vesicle clustering;GO:0097479 synaptic vesicle localization		Predicted intracellular proteins; Disease related genes		Adenosine 5'-[gamma-thio]triphosphate			0.0	0.0	0.0	0.0	0.0	0.0	0.0	0.0	0.0	0.0	0.0	0.0	0.0	0.0	0.0	0.0	0.0	0.0	0.0	0.0
SYNE2	23224	symbol	H. sapiens	23224	H. sapiens	SYNE2	spectrin repeat containing nuclear envelope protein 2	GO:0031022 nuclear migration along microfilament;GO:0007097 nuclear migration;GO:0099515 actin filament-based transport		Predicted intracellular proteins; Disease related genes	Intermediate filaments;Nuclear membrane (Approved)				1.0	0.0	0.0	0.0	0.0	0.0	0.0	0.0	0.0	0.0	0.0	0.0	0.0	1.0	0.0	0.0	0.0	0.0	0.0	0.0
SYNE3	161176	symbol	H. sapiens	161176	H. sapiens	SYNE3	spectrin repeat containing nuclear envelope family member 3	GO:0007097 nuclear migration;GO:0051647 nucleus localization;GO:0008360 regulation of cell shape		Predicted intracellular proteins	Nuclear membrane (Supported)				0.0	0.0	0.0	0.0	0.0	0.0	0.0	0.0	0.0	0.0	0.0	0.0	0.0	0.0	0.0	0.0	0.0	0.0	0.0	0.0
SYNGR2	9144	symbol	H. sapiens	9144	H. sapiens	SYNGR2	synaptogyrin 2	GO:0048499 synaptic vesicle membrane organization;GO:0045055 regulated exocytosis;GO:0006887 exocytosis		Predicted intracellular proteins	Golgi apparatus (Approved)			(M5947)HALLMARK IL2 STAT5 SIGNALING; (M5909)HALLMARK MYOGENESIS	0.0	0.0	0.0	0.0	0.0	0.0	0.0	0.0	0.0	0.0	0.0	0.0	0.0	0.0	0.0	0.0	0.0	0.0	0.0	0.0
SYNGR3	9143	symbol	H. sapiens	9143	H. sapiens	SYNGR3	synaptogyrin 3	GO:0001504 neurotransmitter uptake;GO:0021762 substantia nigra development;GO:0048857 neural nucleus development		Predicted intracellular proteins	Plasma membrane (Approved)				0.0	0.0	0.0	0.0	0.0	0.0	0.0	0.0	0.0	1.0	0.0	0.0	0.0	0.0	0.0	0.0	0.0	0.0	0.0	0.0
SYNM	23336	symbol	H. sapiens	23336	H. sapiens	SYNM	synemin	GO:0031443 fast-twitch skeletal muscle fiber contraction;GO:0003010 voluntary skeletal muscle contraction;GO:0014721 twitch skeletal muscle contraction		Predicted intracellular proteins	Intermediate filaments (Supported)				0.0	0.0	0.0	0.0	0.0	0.0	0.0	0.0	0.0	0.0	0.0	0.0	0.0	0.0	0.0	0.0	0.0	0.0	0.0	0.0
SYT16	83851	symbol	H. sapiens	83851	H. sapiens	SYT16	synaptotagmin 16	GO:0006887 exocytosis;GO:0032940 secretion by cell;GO:0140352 export from cell		Predicted intracellular proteins	Cytosol (Approved)				0.0	0.0	0.0	0.0	0.0	0.0	0.0	0.0	0.0	0.0	0.0	0.0	0.0	0.0	0.0	0.0	0.0	0.0	0.0	0.0
TALDO1	6888	symbol	H. sapiens	6888	H. sapiens	TALDO1	transaldolase 1	GO:0019682 glyceraldehyde-3-phosphate metabolic process;GO:0009052 pentose-phosphate shunt, non-oxidative branch;GO:0006002 fructose 6-phosphate metabolic process		ENZYME proteins:Transferases; Predicted intracellular proteins; Enzymes; Disease related genes; Potential drug targets	Nucleoplasm (Approved); Additional: Cytosol			(M5951)HALLMARK SPERMATOGENESIS; (M5905)HALLMARK ADIPOGENESIS; (M5937)HALLMARK GLYCOLYSIS	0.0	0.0	1.0	0.0	0.0	0.0	0.0	0.0	0.0	0.0	0.0	0.0	0.0	0.0	0.0	0.0	0.0	0.0	0.0	0.0
TAX1BP3	30851	symbol	H. sapiens	30851	H. sapiens	TAX1BP3	Tax1 binding protein 3	GO:2000009 negative regulation of protein localization to cell surface;GO:2000008 regulation of protein localization to cell surface;GO:0034394 protein localization to cell surface		Predicted intracellular proteins	Actin filaments;Nucleoli fibrillar center (Approved); Additional: Vesicles			(M5939)HALLMARK P53 PATHWAY	1.0	0.0	0.0	0.0	0.0	0.0	0.0	0.0	0.0	0.0	0.0	0.0	0.0	0.0	0.0	0.0	0.0	0.0	0.0	0.0
TBC1D24	57465	symbol	H. sapiens	57465	H. sapiens	TBC1D24	TBC1 domain family member 24	GO:0036466 synaptic vesicle recycling via endosome;GO:0099532 synaptic vesicle endosomal processing;GO:0007274 neuromuscular synaptic transmission		Predicted intracellular proteins; Disease related genes	Cell Junctions;Plasma membrane (Supported)				0.0	0.0	0.0	0.0	0.0	0.0	0.0	0.0	0.0	0.0	1.0	0.0	0.0	0.0	0.0	0.0	0.0	0.0	0.0	0.0
TBX2	6909	symbol	H. sapiens	6909	H. sapiens	TBX2	T-box transcription factor 2	GO:1901208 negative regulation of heart looping;GO:1901210 regulation of cardiac chamber formation;GO:1901211 negative regulation of cardiac chamber formation		Predicted intracellular proteins; Transcription factors:Immunoglobulin fold	Nucleoplasm (Approved); Additional: Cytosol				0.0	0.0	0.0	0.0	1.0	0.0	1.0	0.0	1.0	0.0	0.0	0.0	0.0	1.0	0.0	0.0	0.0	1.0	0.0	0.0
TBX2-AS1	103689912	symbol	H. sapiens	103689912	H. sapiens	TBX2-AS1	TBX2 antisense RNA 1								0.0	0.0	0.0	0.0	0.0	0.0	0.0	0.0	0.0	0.0	0.0	0.0	0.0	0.0	0.0	0.0	0.0	0.0	0.0	0.0
TCEAL2	140597	symbol	H. sapiens	140597	H. sapiens	TCEAL2	transcription elongation factor A like 2			Predicted intracellular proteins	Nuclear speckles (Approved); Additional: Cytosol				0.0	0.0	0.0	0.0	0.0	0.0	0.0	0.0	0.0	0.0	0.0	0.0	0.0	0.0	0.0	0.0	0.0	0.0	0.0	0.0
TEAD2	8463	symbol	H. sapiens	8463	H. sapiens	TEAD2	TEA domain transcription factor 2	GO:0048368 lateral mesoderm development;GO:0048339 paraxial mesoderm development;GO:0030903 notochord development		Predicted intracellular proteins; Transcription factors:Helix-turn-helix domains	Nucleoplasm (Supported)				0.0	0.0	0.0	0.0	1.0	0.0	0.0	0.0	1.0	0.0	0.0	0.0	0.0	1.0	0.0	1.0	0.0	1.0	0.0	1.0
TEAD3	7005	symbol	H. sapiens	7005	H. sapiens	TEAD3	TEA domain transcription factor 3	GO:0055059 asymmetric neuroblast division;GO:0055057 neuroblast division;GO:0008356 asymmetric cell division		Predicted intracellular proteins; Transcription factors:Helix-turn-helix domains					0.0	0.0	0.0	0.0	1.0	0.0	0.0	0.0	0.0	0.0	0.0	0.0	0.0	0.0	0.0	1.0	0.0	0.0	0.0	1.0
TEAD4	7004	symbol	H. sapiens	7004	H. sapiens	TEAD4	TEA domain transcription factor 4	GO:0035329 hippo signaling;GO:0007517 muscle organ development;GO:0048568 embryonic organ development		Predicted intracellular proteins; Transcription factors:Helix-turn-helix domains	Nucleoplasm (Supported)			(M5909)HALLMARK MYOGENESIS	0.0	0.0	0.0	0.0	1.0	0.0	0.0	0.0	1.0	0.0	0.0	1.0	0.0	0.0	0.0	1.0	0.0	0.0	0.0	1.0
TERC	7012	symbol	H. sapiens	7012	H. sapiens	TERC	telomerase RNA component	GO:2000773 negative regulation of cellular senescence;GO:0090344 negative regulation of cell aging;GO:2000772 regulation of cellular senescence							1.0	0.0	0.0	0.0	0.0	0.0	0.0	0.0	0.0	0.0	0.0	0.0	0.0	0.0	0.0	0.0	0.0	0.0	0.0	0.0
TFAP2A	7020	symbol	H. sapiens	7020	H. sapiens	TFAP2A	transcription factor AP-2 alpha	GO:0003409 optic cup structural organization;GO:0021622 oculomotor nerve morphogenesis;GO:0021623 oculomotor nerve formation		Predicted intracellular proteins; Transcription factors:Basic domains; Disease related genes	Nucleoplasm (Enhanced)		(M220)PID CASPASE PATHWAY		1.0	0.0	0.0	0.0	1.0	0.0	1.0	0.0	0.0	0.0	0.0	1.0	1.0	0.0	1.0	1.0	0.0	1.0	0.0	0.0
TFAP2A-AS1	100130275	symbol	H. sapiens	100130275	H. sapiens	TFAP2A-AS1	TFAP2A antisense RNA 1								0.0	0.0	0.0	0.0	0.0	0.0	0.0	0.0	0.0	0.0	0.0	0.0	0.0	0.0	0.0	0.0	0.0	0.0	0.0	0.0
TGFB2	7042	symbol	H. sapiens	7042	H. sapiens	TGFB2	transforming growth factor beta 2	GO:1903701 substantia propria of cornea development;GO:0042704 uterine wall breakdown;GO:0051795 positive regulation of timing of catagen		Cancer-related genes:Candidate cancer biomarkers; Predicted secreted proteins; Disease related genes			(M11736)SA MMP CYTOKINE CONNECTION; (M211)PID HEDGEHOG 2PATHWAY; (M33)PID GLYPICAN 1PATHWAY	(M5902)HALLMARK APOPTOSIS; (M5934)HALLMARK XENOBIOTIC METABOLISM; (M5950)HALLMARK ALLOGRAFT REJECTION	0.0	0.0	1.0	1.0	1.0	1.0	1.0	0.0	1.0	0.0	1.0	1.0	0.0	1.0	1.0	1.0	0.0	1.0	1.0	0.0
THEM6	51337	symbol	H. sapiens	51337	H. sapiens	THEM6	thioesterase superfamily member 6			Predicted intracellular proteins; Predicted secreted proteins	Cytosol;Nuclear speckles (Approved)				0.0	0.0	0.0	0.0	0.0	0.0	0.0	0.0	0.0	0.0	0.0	0.0	0.0	0.0	0.0	0.0	0.0	0.0	0.0	0.0
THOC5	8563	symbol	H. sapiens	8563	H. sapiens	THOC5	THO complex 5	GO:2000002 negative regulation of DNA damage checkpoint;GO:0060215 primitive hemopoiesis;GO:1901977 negative regulation of cell cycle checkpoint		Predicted intracellular proteins	Nucleoplasm (Supported)				1.0	0.0	0.0	0.0	1.0	0.0	0.0	1.0	0.0	0.0	0.0	0.0	0.0	0.0	0.0	0.0	0.0	0.0	0.0	0.0
TIMM17B	10245	symbol	H. sapiens	10245	H. sapiens	TIMM17B	translocase of inner mitochondrial membrane 17B	GO:0030150 protein import into mitochondrial matrix;GO:0044743 protein transmembrane import into intracellular organelle;GO:0065002 intracellular protein transmembrane transport		Predicted intracellular proteins	Microtubules (Approved); Additional: Mitochondria				0.0	0.0	0.0	0.0	0.0	0.0	0.0	0.0	0.0	0.0	0.0	0.0	0.0	0.0	0.0	0.0	0.0	0.0	0.0	0.0
TIMM44	10469	symbol	H. sapiens	10469	H. sapiens	TIMM44	translocase of inner mitochondrial membrane 44	GO:0030150 protein import into mitochondrial matrix;GO:0044743 protein transmembrane import into intracellular organelle;GO:0065002 intracellular protein transmembrane transport		Predicted intracellular proteins	Mitochondria (Enhanced)				0.0	0.0	0.0	0.0	0.0	0.0	0.0	0.0	0.0	0.0	0.0	0.0	0.0	0.0	0.0	0.0	0.0	0.0	0.0	0.0
TIMM8B	26521	symbol	H. sapiens	26521	H. sapiens	TIMM8B	translocase of inner mitochondrial membrane 8 homolog B	GO:0045039 protein insertion into mitochondrial inner membrane;GO:0051204 protein insertion into mitochondrial membrane;GO:0090151 establishment of protein localization to mitochondrial membrane		Predicted intracellular proteins				(M5936)HALLMARK OXIDATIVE PHOSPHORYLATION	0.0	0.0	0.0	0.0	0.0	0.0	0.0	0.0	0.0	0.0	0.0	0.0	0.0	0.0	0.0	0.0	0.0	0.0	0.0	0.0
TINAGL1	64129	symbol	H. sapiens	64129	H. sapiens	TINAGL1	tubulointerstitial nephritis antigen like 1	GO:0016197 endosomal transport;GO:0046907 intracellular transport;GO:0016192 vesicle-mediated transport		Predicted intracellular proteins; Peptidases:Cysteine-type peptidases; Enzymes; Predicted secreted proteins			(M3008)NABA ECM GLYCOPROTEINS; (M5884)NABA CORE MATRISOME; (M5889)NABA MATRISOME		0.0	0.0	0.0	0.0	0.0	0.0	0.0	0.0	0.0	0.0	0.0	0.0	0.0	0.0	0.0	0.0	0.0	0.0	0.0	0.0
TLE4	7091	symbol	H. sapiens	7091	H. sapiens	TLE4	TLE family member 4, transcriptional corepressor	GO:1990830 cellular response to leukemia inhibitory factor;GO:1990823 response to leukemia inhibitory factor;GO:0090090 negative regulation of canonical Wnt signaling pathway		Predicted intracellular proteins	Nucleoplasm (Supported)		(M223)PID BETA CATENIN NUC PATHWAY	(M5951)HALLMARK SPERMATOGENESIS	1.0	0.0	0.0	0.0	0.0	0.0	0.0	0.0	0.0	0.0	0.0	0.0	0.0	0.0	0.0	0.0	0.0	0.0	0.0	1.0
TLL1	7092	symbol	H. sapiens	7092	H. sapiens	TLL1	tolloid like 1	GO:0030199 collagen fibril organization;GO:0030198 extracellular matrix organization;GO:0043062 extracellular structure organization		Predicted intracellular proteins; Predicted secreted proteins; Enzymes; Disease related genes; Potential drug targets; Peptidases:Metallopeptidases	Vesicles (Approved)		(M3468)NABA ECM REGULATORS; (M5885)NABA MATRISOME ASSOCIATED; (M5889)NABA MATRISOME		0.0	0.0	0.0	0.0	0.0	0.0	0.0	0.0	0.0	0.0	0.0	1.0	0.0	0.0	0.0	0.0	0.0	0.0	0.0	0.0
TM4SF1	4071	symbol	H. sapiens	4071	H. sapiens	TM4SF1	transmembrane 4 L six family member 1	GO:0008150 biological_process						(M5939)HALLMARK P53 PATHWAY	0.0	0.0	0.0	0.0	0.0	0.0	0.0	0.0	0.0	0.0	0.0	0.0	0.0	0.0	0.0	0.0	0.0	0.0	0.0	0.0
TM7SF2	7108	symbol	H. sapiens	7108	H. sapiens	TM7SF2	transmembrane 7 superfamily member 2	GO:0006695 cholesterol biosynthetic process;GO:1902653 secondary alcohol biosynthetic process;GO:0016126 sterol biosynthetic process		Predicted intracellular proteins; Enzymes; ENZYME proteins:Oxidoreductases	Endoplasmic reticulum (Supported); Additional: Vesicles			(M5892)HALLMARK CHOLESTEROL HOMEOSTASIS; (M5924)HALLMARK MTORC1 SIGNALING	0.0	0.0	0.0	0.0	0.0	0.0	0.0	0.0	0.0	0.0	0.0	0.0	0.0	0.0	0.0	0.0	0.0	0.0	0.0	0.0
TMC6	11322	symbol	H. sapiens	11322	H. sapiens	TMC6	transmembrane channel like 6	GO:0034220 ion transmembrane transport;GO:0055085 transmembrane transport;GO:0006811 ion transport		Transporters:Transporter channels and pores; Predicted intracellular proteins; Potential drug targets; Disease related genes					0.0	0.0	0.0	0.0	0.0	0.0	0.0	0.0	0.0	0.0	0.0	0.0	0.0	0.0	0.0	0.0	0.0	0.0	0.0	0.0
TMEM101	84336	symbol	H. sapiens	84336	H. sapiens	TMEM101	transmembrane protein 101	GO:0043123 positive regulation of I-kappaB kinase/NF-kappaB signaling;GO:0043122 regulation of I-kappaB kinase/NF-kappaB signaling;GO:0007249 I-kappaB kinase/NF-kappaB signaling		Predicted intracellular proteins	Nucleoplasm;Plasma membrane (Approved)				0.0	0.0	0.0	0.0	0.0	0.0	0.0	0.0	0.0	0.0	0.0	0.0	0.0	0.0	0.0	0.0	0.0	0.0	0.0	0.0
TMEM120B	144404	symbol	H. sapiens	144404	H. sapiens	TMEM120B	transmembrane protein 120B	GO:0051291 protein heterooligomerization;GO:0045444 fat cell differentiation;GO:0051259 protein complex oligomerization		Predicted intracellular proteins	Nucleoli fibrillar center (Approved); Additional: Cytosol				0.0	0.0	0.0	0.0	0.0	0.0	0.0	0.0	0.0	0.0	0.0	0.0	0.0	0.0	0.0	0.0	0.0	0.0	0.0	0.0
TMEM132A	54972	symbol	H. sapiens	54972	H. sapiens	TMEM132A	transmembrane protein 132A	GO:0008150 biological_process		Predicted intracellular proteins	Mitochondria (Approved)				0.0	0.0	0.0	0.0	0.0	0.0	0.0	0.0	0.0	0.0	0.0	0.0	0.0	0.0	0.0	0.0	0.0	0.0	0.0	0.0
TMEM161A	54929	symbol	H. sapiens	54929	H. sapiens	TMEM161A	transmembrane protein 161A	GO:1902230 negative regulation of intrinsic apoptotic signaling pathway in response to DNA damage;GO:1902229 regulation of intrinsic apoptotic signaling pathway in response to DNA damage;GO:0045739 positive regulation of DNA repair			Cytosol (Approved)				0.0	0.0	0.0	0.0	0.0	0.0	0.0	0.0	0.0	0.0	0.0	0.0	0.0	0.0	0.0	0.0	0.0	0.0	0.0	0.0
TMEM184A	202915	symbol	H. sapiens	202915	H. sapiens	TMEM184A	transmembrane protein 184A	GO:0006810 transport;GO:0051234 establishment of localization;GO:0051179 localization			Nucleoplasm (Uncertain)				0.0	0.0	0.0	0.0	0.0	0.0	0.0	0.0	0.0	0.0	0.0	0.0	0.0	0.0	0.0	0.0	0.0	0.0	0.0	0.0
TMEM2	23670	gene_synonym	H. sapiens	23670	H. sapiens	CEMIP2	cell migration inducing hyaluronidase 2	GO:0030214 hyaluronan catabolic process;GO:0006027 glycosaminoglycan catabolic process;GO:0030212 hyaluronan metabolic process		Predicted intracellular proteins; ENZYME proteins:Hydrolases; Enzymes	Plasma membrane (Supported); Additional: Vesicles				0.0	0.0	0.0	0.0	0.0	0.0	0.0	0.0	0.0	0.0	0.0	0.0	0.0	1.0	0.0	0.0	0.0	0.0	0.0	0.0
TMEM25	84866	symbol	H. sapiens	84866	H. sapiens	TMEM25	transmembrane protein 25	GO:0090394 negative regulation of excitatory postsynaptic potential;GO:0098815 modulation of excitatory postsynaptic potential;GO:0050805 negative regulation of synaptic transmission		Predicted intracellular proteins	Golgi apparatus;Vesicles (Approved)				0.0	0.0	0.0	0.0	0.0	0.0	0.0	0.0	0.0	0.0	0.0	0.0	0.0	0.0	0.0	0.0	0.0	0.0	0.0	0.0
TMEM255A	55026	symbol	H. sapiens	55026	H. sapiens	TMEM255A	transmembrane protein 255A			Transporters	Nuclear bodies;Nucleoplasm (Uncertain)				0.0	0.0	0.0	0.0	0.0	0.0	0.0	0.0	0.0	0.0	0.0	0.0	0.0	0.0	0.0	0.0	0.0	0.0	0.0	0.0
TMEM261	90871	gene_synonym	H. sapiens	90871	H. sapiens	DMAC1	distal membrane arm assembly component 1	GO:0010257 NADH dehydrogenase complex assembly;GO:0032981 mitochondrial respiratory chain complex I assembly;GO:0033108 mitochondrial respiratory chain complex assembly							0.0	0.0	0.0	0.0	0.0	0.0	0.0	0.0	0.0	0.0	0.0	0.0	0.0	0.0	0.0	0.0	0.0	0.0	0.0	0.0
TMEM75	641384	gene_synonym	H. sapiens	641384	H. sapiens	LINC02912	long intergenic non-protein coding RNA 2912								0.0	0.0	0.0	0.0	0.0	0.0	0.0	0.0	0.0	0.0	0.0	0.0	0.0	0.0	0.0	0.0	0.0	0.0	0.0	0.0
TMPPE	643853	symbol	H. sapiens	643853	H. sapiens	TMPPE	transmembrane protein with metallophosphoesterase domain			Predicted intracellular proteins	Mitochondria;Nucleoplasm (Approved)				0.0	0.0	0.0	0.0	0.0	0.0	0.0	0.0	0.0	0.0	0.0	0.0	0.0	0.0	0.0	0.0	0.0	0.0	0.0	0.0
TMSB15A	11013	symbol	H. sapiens	11013	H. sapiens	TMSB15A	thymosin beta 15A	GO:0042989 sequestering of actin monomers;GO:0030837 negative regulation of actin filament polymerization;GO:0032507 maintenance of protein location in cell		Predicted intracellular proteins					0.0	0.0	0.0	0.0	0.0	0.0	0.0	0.0	0.0	0.0	0.0	0.0	0.0	0.0	0.0	0.0	0.0	0.0	0.0	0.0
TNFSF15	9966	symbol	H. sapiens	9966	H. sapiens	TNFSF15	TNF superfamily member 15	GO:0007250 activation of NF-kappaB-inducing kinase activity;GO:0006919 activation of cysteine-type endopeptidase activity involved in apoptotic process;GO:0043280 positive regulation of cysteine-type endopeptidase activity involved in apoptotic process		Predicted intracellular proteins; Predicted secreted proteins	Nuclear membrane (Approved); Additional: Cytosol;Nucleoplasm		(M5883)NABA SECRETED FACTORS; (M5885)NABA MATRISOME ASSOCIATED; (M5889)NABA MATRISOME	(M5932)HALLMARK INFLAMMATORY RESPONSE	0.0	0.0	1.0	0.0	0.0	0.0	0.0	0.0	0.0	0.0	0.0	0.0	0.0	0.0	0.0	0.0	0.0	0.0	0.0	1.0
TNNC1	7134	symbol	H. sapiens	7134	H. sapiens	TNNC1	troponin C1, slow skeletal and cardiac type	GO:0002086 diaphragm contraction;GO:0032972 regulation of muscle filament sliding speed;GO:0003011 involuntary skeletal muscle contraction		Predicted intracellular proteins; FDA approved drug targets:Small molecule drugs; Disease related genes	Actin filaments;Mitochondria;Nucleoplasm (Approved)	Trifluoperazine; Levosimendan; Felodipine; Bepridil; Calcium; Aluminium monostearate; 5-[1-(3,4-Dimethoxy-Benzoyl)-1,2,3,4-Tetrahydro-Quinolin-6-Yl]-6-Methyl-3,6-Dihydro-[1,3,4]Thiadiazin-2-One; N-(6-Aminohexyl)-5-Chloro-1-Naphthalenesulfonamide		(M5907)HALLMARK ESTROGEN RESPONSE LATE; (M5909)HALLMARK MYOGENESIS	0.0	0.0	0.0	0.0	1.0	0.0	0.0	0.0	1.0	0.0	0.0	0.0	0.0	0.0	0.0	0.0	1.0	0.0	0.0	0.0
TOX	9760	symbol	H. sapiens	9760	H. sapiens	TOX	thymocyte selection associated high mobility group box	GO:0002364 NK T cell lineage commitment;GO:0043375 CD8-positive, alpha-beta T cell lineage commitment;GO:0002362 CD4-positive, CD25-positive, alpha-beta regulatory T cell lineage commitment		Predicted intracellular proteins; Transcription factors:Other all-alpha-helical DNA-binding domains	Nucleoli fibrillar center;Nucleoplasm (Approved)				1.0	0.0	0.0	0.0	0.0	0.0	0.0	0.0	0.0	1.0	1.0	0.0	0.0	0.0	0.0	0.0	0.0	0.0	0.0	0.0
TP53BP2	7159	symbol	H. sapiens	7159	H. sapiens	TP53BP2	tumor protein p53 binding protein 2	GO:1900119 positive regulation of execution phase of apoptosis;GO:1900117 regulation of execution phase of apoptosis;GO:0072332 intrinsic apoptotic signaling pathway by p53 class mediator		Cancer-related genes:Candidate cancer biomarkers; Predicted intracellular proteins	Cell Junctions;Cytosol (Enhanced)		(M145)PID P53 DOWNSTREAM PATHWAY		0.0	0.0	0.0	0.0	0.0	0.0	0.0	0.0	0.0	0.0	0.0	0.0	0.0	0.0	0.0	1.0	0.0	0.0	0.0	1.0
TPM2	7169	symbol	H. sapiens	7169	H. sapiens	TPM2	tropomyosin 2	GO:0043462 regulation of ATPase activity;GO:0006936 muscle contraction;GO:0007015 actin filament organization		Cancer-related genes:Candidate cancer biomarkers; Predicted intracellular proteins; Disease related genes				(M5909)HALLMARK MYOGENESIS; (M5930)HALLMARK EPITHELIAL MESENCHYMAL TRANSITION	0.0	0.0	0.0	0.0	0.0	0.0	0.0	0.0	0.0	0.0	0.0	0.0	0.0	0.0	0.0	0.0	0.0	0.0	0.0	0.0
TPRA1	131601	symbol	H. sapiens	131601	H. sapiens	TPRA1	transmembrane protein adipocyte associated 1	GO:0040016 embryonic cleavage;GO:1901991 negative regulation of mitotic cell cycle phase transition;GO:0045930 negative regulation of mitotic cell cycle		Predicted intracellular proteins	Vesicles (Approved)				0.0	0.0	0.0	0.0	0.0	0.0	0.0	0.0	0.0	0.0	0.0	0.0	0.0	0.0	0.0	0.0	0.0	0.0	0.0	0.0
TRAF4	9618	symbol	H. sapiens	9618	H. sapiens	TRAF4	TNF receptor associated factor 4	GO:0007250 activation of NF-kappaB-inducing kinase activity;GO:0007585 respiratory gaseous exchange by respiratory system;GO:0046330 positive regulation of JNK cascade		Cancer-related genes:Candidate cancer biomarkers; Predicted intracellular proteins	Nucleoli fibrillar center (Supported); Additional: Cytosol;Nucleoplasm		(M256)PID TAP63 PATHWAY	(M5939)HALLMARK P53 PATHWAY	0.0	0.0	0.0	0.0	0.0	1.0	0.0	0.0	0.0	0.0	0.0	0.0	0.0	0.0	0.0	0.0	0.0	0.0	0.0	0.0
TRAPPC2	6399	symbol	H. sapiens	6399	H. sapiens	TRAPPC2	trafficking protein particle complex subunit 2	GO:0006888 endoplasmic reticulum to Golgi vesicle-mediated transport;GO:0048193 Golgi vesicle transport;GO:0001501 skeletal system development		Predicted intracellular proteins; Disease related genes	Endoplasmic reticulum;Vesicles (Approved); Additional: Nucleoplasm				0.0	0.0	0.0	0.0	0.0	0.0	0.0	0.0	0.0	0.0	0.0	1.0	0.0	0.0	0.0	0.0	0.0	0.0	0.0	0.0
TRIM58	25893	symbol	H. sapiens	25893	H. sapiens	TRIM58	tripartite motif containing 58	GO:0016567 protein ubiquitination;GO:0032446 protein modification by small protein conjugation;GO:0045087 innate immune response		ENZYME proteins:Transferases; Predicted intracellular proteins; Enzymes				(M5945)HALLMARK HEME METABOLISM	0.0	0.0	0.0	0.0	0.0	0.0	0.0	0.0	0.0	0.0	0.0	0.0	0.0	0.0	0.0	0.0	0.0	0.0	0.0	0.0
TRIM67	440730	symbol	H. sapiens	440730	H. sapiens	TRIM67	tripartite motif containing 67	GO:0046580 negative regulation of Ras protein signal transduction;GO:0051058 negative regulation of small GTPase mediated signal transduction;GO:2000060 positive regulation of ubiquitin-dependent protein catabolic process		Predicted intracellular proteins					0.0	0.0	0.0	0.0	0.0	0.0	0.0	0.0	0.0	0.0	1.0	0.0	0.0	0.0	0.0	0.0	0.0	0.0	0.0	0.0
TRMT112	51504	symbol	H. sapiens	51504	H. sapiens	TRMT112	tRNA methyltransferase activator subunit 11-2	GO:0070476 rRNA (guanine-N7)-methylation;GO:0018364 peptidyl-glutamine methylation;GO:0036265 RNA (guanine-N7)-methylation		Predicted intracellular proteins	Microtubules (Approved); Additional: Nucleoplasm				0.0	0.0	0.0	0.0	0.0	0.0	0.0	1.0	0.0	0.0	0.0	0.0	0.0	0.0	0.0	0.0	0.0	0.0	0.0	0.0
TRPC6	7225	symbol	H. sapiens	7225	H. sapiens	TRPC6	transient receptor potential cation channel subfamily C member 6	GO:0050774 negative regulation of dendrite morphogenesis;GO:0006828 manganese ion transport;GO:0010800 positive regulation of peptidyl-threonine phosphorylation		Transporters:Transporter channels and pores; Potential drug targets; Voltage-gated ion channels:Transient Receptor Potential Channels; Disease related genes			(M193)PID NEPHRIN NEPH1 PATHWAY; (M233)PID EPO PATHWAY; (M238)PID THROMBIN PAR1 PATHWAY		0.0	0.0	1.0	1.0	0.0	0.0	0.0	1.0	0.0	0.0	1.0	0.0	0.0	0.0	0.0	0.0	0.0	0.0	0.0	0.0
TRPT1	83707	symbol	H. sapiens	83707	H. sapiens	TRPT1	tRNA phosphotransferase 1	GO:0006388 tRNA splicing, via endonucleolytic cleavage and ligation;GO:0000394 RNA splicing, via endonucleolytic cleavage and ligation;GO:0008033 tRNA processing		ENZYME proteins:Transferases; Predicted intracellular proteins; Enzymes	Mitochondria (Approved)				0.0	0.0	0.0	0.0	0.0	0.0	0.0	0.0	0.0	0.0	0.0	0.0	0.0	0.0	0.0	0.0	0.0	0.0	0.0	0.0
TSEN34	79042	symbol	H. sapiens	79042	H. sapiens	TSEN34	tRNA splicing endonuclease subunit 34	GO:0000379 tRNA-type intron splice site recognition and cleavage;GO:0006388 tRNA splicing, via endonucleolytic cleavage and ligation;GO:0000394 RNA splicing, via endonucleolytic cleavage and ligation		ENZYME proteins:Lyases; Predicted intracellular proteins; Enzymes; Disease related genes; Potential drug targets	Nucleoplasm (Supported)				0.0	0.0	0.0	0.0	0.0	0.0	0.0	1.0	0.0	0.0	0.0	0.0	0.0	0.0	0.0	0.0	0.0	0.0	0.0	0.0
TSEN54	283989	symbol	H. sapiens	283989	H. sapiens	TSEN54	tRNA splicing endonuclease subunit 54	GO:0000379 tRNA-type intron splice site recognition and cleavage;GO:0006388 tRNA splicing, via endonucleolytic cleavage and ligation;GO:0000394 RNA splicing, via endonucleolytic cleavage and ligation		Predicted intracellular proteins; Disease related genes	Nucleoplasm (Approved)				0.0	0.0	0.0	0.0	0.0	0.0	0.0	1.0	0.0	0.0	0.0	0.0	0.0	0.0	0.0	0.0	0.0	0.0	0.0	0.0
TSPAN14	81619	symbol	H. sapiens	81619	H. sapiens	TSPAN14	tetraspanin 14	GO:0045747 positive regulation of Notch signaling pathway;GO:0008593 regulation of Notch signaling pathway;GO:0007219 Notch signaling pathway		Transporters:Accessory Factors Involved in Transport	Vesicles (Supported)				1.0	0.0	0.0	0.0	0.0	0.0	0.0	0.0	0.0	0.0	0.0	0.0	0.0	0.0	0.0	0.0	0.0	0.0	0.0	0.0
TSPAN7	7102	symbol	H. sapiens	7102	H. sapiens	TSPAN7	tetraspanin 7			Disease related genes; Potential drug targets; CD markers; Transporters:Accessory Factors Involved in Transport				(M5953)HALLMARK KRAS SIGNALING UP	0.0	0.0	1.0	0.0	0.0	0.0	0.0	0.0	0.0	0.0	0.0	0.0	0.0	0.0	0.0	0.0	0.0	0.0	0.0	0.0
TSTA3	7264	gene_synonym	H. sapiens	7264	H. sapiens	GFUS	GDP-L-fucose synthase	GO:0042351 'de novo' GDP-L-fucose biosynthetic process;GO:0042350 GDP-L-fucose biosynthetic process;GO:0046368 GDP-L-fucose metabolic process		Predicted intracellular proteins; Enzymes; ENZYME proteins:Oxidoreductases	Cytosol (Approved); Additional: Nucleoplasm	NADH		(M5907)HALLMARK ESTROGEN RESPONSE LATE; (M5937)HALLMARK GLYCOLYSIS	0.0	0.0	0.0	0.0	0.0	0.0	0.0	0.0	0.0	0.0	0.0	0.0	0.0	1.0	0.0	0.0	0.0	0.0	0.0	0.0
TUBB2B	347733	symbol	H. sapiens	347733	H. sapiens	TUBB2B	tubulin beta 2B class IIb	GO:1902669 positive regulation of axon guidance;GO:1902667 regulation of axon guidance;GO:1990403 embryonic brain development		Predicted intracellular proteins; Disease related genes	Microtubules (Supported); Additional: Cytokinetic bridge;Mitotic spindle	CYT997; 2-MERCAPTO-N-[1,2,3,10-TETRAMETHOXY-9-OXO-5,6,7,9-TETRAHYDRO-BENZO[A]HEPTALEN-7-YL]ACETAMIDE		(M5906)HALLMARK ESTROGEN RESPONSE EARLY	1.0	0.0	1.0	0.0	1.0	0.0	0.0	1.0	0.0	0.0	1.0	0.0	0.0	1.0	0.0	1.0	0.0	0.0	0.0	1.0
TUSC1	286319	symbol	H. sapiens	286319	H. sapiens	TUSC1	tumor suppressor candidate 1			Predicted intracellular proteins	Vesicles (Approved); Additional: Nucleoplasm				0.0	0.0	0.0	0.0	0.0	0.0	0.0	0.0	0.0	0.0	0.0	0.0	0.0	0.0	0.0	0.0	0.0	0.0	0.0	0.0
TWIST1	7291	symbol	H. sapiens	7291	H. sapiens	TWIST1	twist family bHLH transcription factor 1	GO:0140049 regulation of endocardial cushion to mesenchymal transition;GO:0140051 positive regulation of endocardial cushion to mesenchymal transition;GO:2000800 regulation of endocardial cushion to mesenchymal transition involved in heart valve formation		Cancer-related genes:Candidate cancer biomarkers; Predicted intracellular proteins; Transcription factors:Basic domains; Disease related genes			(M44)PID HIF2PATHWAY; (M288)PID HES HEY PATHWAY		1.0	0.0	1.0	1.0	1.0	0.0	1.0	0.0	1.0	0.0	0.0	1.0	1.0	1.0	1.0	0.0	0.0	1.0	1.0	1.0
TXNDC5	81567	symbol	H. sapiens	81567	H. sapiens	TXNDC5	thioredoxin domain containing 5	GO:0043277 apoptotic cell clearance;GO:0006909 phagocytosis;GO:0043066 negative regulation of apoptotic process		Predicted intracellular proteins	Endoplasmic reticulum (Approved)				0.0	0.0	0.0	0.0	0.0	0.0	0.0	0.0	0.0	0.0	0.0	0.0	0.0	0.0	0.0	0.0	0.0	0.0	0.0	0.0
UBASH3B	84959	symbol	H. sapiens	84959	H. sapiens	UBASH3B	ubiquitin associated and SH3 domain containing B	GO:0090331 negative regulation of platelet aggregation;GO:0038063 collagen-activated tyrosine kinase receptor signaling pathway;GO:0034111 negative regulation of homotypic cell-cell adhesion		Predicted intracellular proteins; ENZYME proteins:Hydrolases; Enzymes	Plasma membrane (Approved)				1.0	0.0	0.0	1.0	0.0	0.0	0.0	0.0	0.0	0.0	0.0	0.0	0.0	0.0	0.0	0.0	1.0	0.0	0.0	0.0
UBB	7314	symbol	H. sapiens	7314	H. sapiens	UBB	ubiquitin B	GO:1902527 positive regulation of protein monoubiquitination;GO:0060613 fat pad development;GO:1902525 regulation of protein monoubiquitination		Predicted intracellular proteins		(4s)-5-Fluoro-L-Leucine			1.0	1.0	1.0	0.0	0.0	0.0	0.0	1.0	0.0	1.0	1.0	1.0	0.0	0.0	0.0	0.0	1.0	0.0	0.0	1.0
UBE2M	9040	symbol	H. sapiens	9040	H. sapiens	UBE2M	ubiquitin conjugating enzyme E2 M	GO:0045116 protein neddylation;GO:0043687 post-translational protein modification;GO:0043525 positive regulation of neuron apoptotic process		Predicted intracellular proteins	Nucleoplasm (Enhanced); Additional: Cytosol;Nuclear bodies;Nucleoli		(M119)PID ERB GENOMIC PATHWAY; (M200)PID ERA GENOMIC PATHWAY		0.0	0.0	1.0	0.0	0.0	0.0	0.0	0.0	0.0	0.0	0.0	0.0	0.0	0.0	0.0	0.0	0.0	0.0	0.0	1.0
UBE2V1	7335	symbol	H. sapiens	7335	H. sapiens	UBE2V1	ubiquitin conjugating enzyme E2 V1	GO:0006301 postreplication repair;GO:0070534 protein K63-linked ubiquitination;GO:0006282 regulation of DNA repair		Predicted intracellular proteins	Nucleoplasm (Enhanced)		(M110)PID IL1 PATHWAY		0.0	0.0	1.0	0.0	0.0	0.0	0.0	0.0	0.0	0.0	0.0	0.0	0.0	0.0	0.0	0.0	0.0	0.0	0.0	1.0
UBTD1	80019	symbol	H. sapiens	80019	H. sapiens	UBTD1	ubiquitin domain containing 1			Predicted intracellular proteins	Vesicles (Approved); Additional: Cytosol;Plasma membrane				0.0	0.0	0.0	0.0	0.0	0.0	0.0	0.0	0.0	0.0	0.0	0.0	0.0	0.0	0.0	0.0	0.0	0.0	0.0	0.0
UNC13D	201294	symbol	H. sapiens	201294	H. sapiens	UNC13D	unc-13 homolog D	GO:0002432 granuloma formation;GO:0043320 natural killer cell degranulation;GO:0002467 germinal center formation		Predicted intracellular proteins; Disease related genes	Cytosol (Supported); Additional: Vesicles				0.0	0.0	0.0	0.0	0.0	0.0	0.0	0.0	0.0	0.0	1.0	0.0	0.0	0.0	0.0	0.0	0.0	0.0	0.0	0.0
UQCR10	29796	symbol	H. sapiens	29796	H. sapiens	UQCR10	ubiquinol-cytochrome c reductase, complex III subunit X	GO:0006122 mitochondrial electron transport, ubiquinol to cytochrome c;GO:0019646 aerobic electron transport chain;GO:0042773 ATP synthesis coupled electron transport				2-Hexyloxy-6-Hydroxymethyl-Tetrahydro-Pyran-3,4,5-Triol; 6-Hydroxy-5-undecyl-4,7-benzothiazoledione; Azoxystrobin; 5-Heptyl-6-hydroxy-1,3-benzothiazole-4,7-dione; (5S)-3-ANILINO-5-(2,4-DIFLUOROPHENYL)-5-METHYL-1,3-OXAZOLIDINE-2,4-DIONE; (S)-famoxadone; METHYL (2Z)-3-METHOXY-2-{2-[(E)-2-PHENYLVINYL]PHENYL}ACRYLATE; 2-Nonyl-4-quinolinol 1-oxide; Ubiquinone Q2		(M5905)HALLMARK ADIPOGENESIS; (M5936)HALLMARK OXIDATIVE PHOSPHORYLATION	0.0	0.0	0.0	0.0	0.0	0.0	0.0	0.0	0.0	0.0	0.0	0.0	0.0	0.0	0.0	0.0	0.0	0.0	0.0	0.0
[truncated: 51 more rows]

## Sheet: Enrichment
GroupID	Category	Term	Description	LogP	Log(q-value)	InTerm_InList	Genes	Symbols
[truncated: 406 more rows]
