# Supplementary material for: Transcriptional profiling of Hutchinson-Gilford Progeria syndrome fibroblasts reveals deficits in mesenchymal stem cell commitment to differentiation related to early events in endochondral ossification
Source: eLife journal article supplement (doi:10.7554/elife.81290), 2022-12-29
Supplement: table1-data1 [file metascape_result.xlsx]

## Sheet: Annotation
MyList	Gene ID	Type	Tax ID	Homologene Gene ID	Homologene Gene Tax ID	Gene Symbol	Description	Biological Process (GO)	Kinase Class (UniProt)	Protein Function (Protein Atlas)	Subcellular Location (Protein Atlas)	Drug (DrugBank)	Canonical Pathways	Hallmark Gene Sets	R-HSA-1640170 Cell Cycle	GO:1903047 mitotic cell cycle process	GO:0006974 cellular response to DNA damag	GO:0000226 microtubule cytoskeleton organ	GO:0016071 mRNA metabolic process	GO:0006260 DNA replication	GO:0051321 meiotic cell cycle	WP2446 Retinoblastoma gene in cancer	GO:0090068 positive regulation of cell cy	GO:0051310 metaphase plate congression	M129 PID PLK1 PATHWAY	ko04110 Cell cycle	GO:0016570 histone modification	R-HSA-69275 G2/M Transition	GO:0007098 centrosome cycle	GO:0034502 protein localization to chromo	GO:1902749 regulation of cell cycle G2/M	M14 PID AURORA B PATHWAY	CORUM:929 CEN complex	GO:0007062 sister chromatid cohesion
AADAT	51166	symbol	H. sapiens	51166	H. sapiens	AADAT	aminoadipate aminotransferase	GO:0033512 L-lysine catabolic process to acetyl-CoA via saccharopine;GO:0019474 L-lysine catabolic process to acetyl-CoA;GO:0019477 L-lysine catabolic process		Predicted intracellular proteins; Enzymes; ENZYME proteins:Transferases	Plasma membrane (Approved); Additional: Vesicles	Pyridoxal phosphate; Glutamic acid		(M5935)HALLMARK FATTY ACID METABOLISM	0	0	0	0	0	0	0	0	0	0	0	0	0	0	0	0	0	0	0	0
ABCA13	154664	symbol	H. sapiens	154664	H. sapiens	ABCA13	ATP binding cassette subfamily A member 13	GO:1900244 positive regulation of synaptic vesicle endocytosis;GO:1903423 positive regulation of synaptic vesicle recycling;GO:0035627 ceramide transport			Vesicles (Approved); Additional: Centrosome;Cytosol				0	0	0	0	0	0	0	0	0	0	0	0	0	0	0	0	0	0	0	0
ABCB4	5244	symbol	H. sapiens	5244	H. sapiens	ABCB4	ATP binding cassette subfamily B member 4	GO:1901557 response to fenofibrate;GO:0099040 ceramide translocation;GO:0099039 sphingolipid translocation		Disease related genes; Predicted intracellular proteins; Transporters:Primary Active Transporters; Potential drug targets; ENZYME proteins:Hydrolases; Enzymes	Actin filaments;Nucleoplasm;Plasma membrane (Approved); Additional: Focal adhesion sites			(M5949)HALLMARK PEROXISOME	0	0	0	0	0	0	0	0	0	0	0	0	0	0	0	0	0	0	0	0
ABI1	10006	symbol	H. sapiens	10006	H. sapiens	ABI1	abl interactor 1	GO:0072673 lamellipodium morphogenesis;GO:0035855 megakaryocyte development;GO:0098751 bone cell development		Predicted intracellular proteins; Disease related genes; Cancer-related genes	Plasma membrane (Approved)		(M277)PID INTEGRIN A4B1 PATHWAY; (M241)PID RAC1 REG PATHWAY; (M156)PID ECADHERIN NASCENT AJ PATHWAY	(M5893)HALLMARK MITOTIC SPINDLE; (M5932)HALLMARK INFLAMMATORY RESPONSE; (M5950)HALLMARK ALLOGRAFT REJECTION	1	0	0	0	0	0	0	0	0	0	0	0	0	0	0	0	0	0	0	0
ABLIM3	22885	symbol	H. sapiens	22885	H. sapiens	ABLIM3	actin binding LIM protein family member 3	GO:1903955 positive regulation of protein targeting to mitochondrion;GO:1903749 positive regulation of establishment of protein localization to mitochondrion;GO:1903214 regulation of protein targeting to mitochondrion		Predicted intracellular proteins	Nucleoplasm;Plasma membrane (Approved); Additional: Cell Junctions				0	0	0	0	0	0	0	0	0	0	0	0	0	0	0	0	0	0	0	0
ACTL6A	86	symbol	H. sapiens	86	H. sapiens	ACTL6A	actin like 6A	GO:0043968 histone H2A acetylation;GO:0001825 blastocyst formation;GO:0043967 histone H4 acetylation		Predicted intracellular proteins; Disease related genes	Nucleoplasm (Enhanced); Additional: Cytosol		(M139)PID MYC PATHWAY; (M66)PID MYC ACTIV PATHWAY		0	0	1	0	0	0	0	0	0	0	0	0	1	0	0	0	0	0	0	0
ADIPOR2	79602	symbol	H. sapiens	79602	H. sapiens	ADIPOR2	adiponectin receptor 2	GO:0061871 negative regulation of hepatic stellate cell migration;GO:0061868 hepatic stellate cell migration;GO:0061869 regulation of hepatic stellate cell migration						(M5916)HALLMARK APICAL SURFACE; (M5935)HALLMARK FATTY ACID METABOLISM; (M5905)HALLMARK ADIPOGENESIS	0	0	0	0	0	0	0	0	0	0	0	0	0	0	0	0	0	0	0	0
ADNP	23394	symbol	H. sapiens	23394	H. sapiens	ADNP	activity dependent neuroprotector homeobox	GO:0033484 nitric oxide homeostasis;GO:0010835 regulation of protein ADP-ribosylation;GO:0033483 gas homeostasis		Disease related genes; Transcription factors:Zinc-coordinating DNA-binding domains; Predicted intracellular proteins; Cancer-related genes:Mutated cancer genes; Transcription factors:Helix-turn-helix domains	Nucleoplasm (Approved)				0	0	0	0	0	0	0	0	0	0	0	0	0	0	0	0	0	0	0	0
AGK	55750	symbol	H. sapiens	55750	H. sapiens	AGK	acylglycerol kinase	GO:0045039 protein insertion into mitochondrial inner membrane;GO:0046834 lipid phosphorylation;GO:0051204 protein insertion into mitochondrial membrane		Disease related genes; ENZYME proteins:Transferases; Predicted intracellular proteins; Potential drug targets; Enzymes	Mitochondria (Supported); Additional: Vesicles				0	0	0	0	0	0	0	0	0	0	0	0	0	0	0	0	0	0	0	0
AHCYL1	10768	symbol	H. sapiens	10768	H. sapiens	AHCYL1	adenosylhomocysteinase like 1	GO:0033353 S-adenosylmethionine cycle;GO:1990456 mitochondrion-endoplasmic reticulum membrane tethering;GO:0042045 epithelial fluid transport		Predicted intracellular proteins	Cytosol (Supported)				0	0	0	0	1	0	0	0	0	1	0	0	0	0	0	0	0	0	0	0
AIMP1	9255	symbol	H. sapiens	9255	H. sapiens	AIMP1	aminoacyl tRNA synthetase complex interacting multifunctional protein 1	GO:0070094 positive regulation of glucagon secretion;GO:0070091 glucagon secretion;GO:0070092 regulation of glucagon secretion		Predicted intracellular proteins; Disease related genes; Predicted secreted proteins	Cytosol (Enhanced)				0	0	0	0	0	0	0	0	0	0	0	0	0	0	0	0	0	0	0	0
ALDOC	230	symbol	H. sapiens	230	H. sapiens	ALDOC	aldolase, fructose-bisphosphate C	GO:0030388 fructose 1,6-bisphosphate metabolic process;GO:0006000 fructose metabolic process;GO:0006096 glycolytic process		ENZYME proteins:Lyases; Predicted intracellular proteins; Cancer-related genes:Candidate cancer biomarkers; Candidate cardiovascular disease genes; Enzymes	Nucleoli fibrillar center;Nucleoplasm (Approved); Additional: Cytosol;Vesicles			(M5892)HALLMARK CHOLESTEROL HOMEOSTASIS; (M5891)HALLMARK HYPOXIA	0	0	0	0	0	0	0	0	0	0	0	0	0	0	0	0	0	0	0	0
ALG6	29929	symbol	H. sapiens	29929	H. sapiens	ALG6	ALG6 alpha-1,3-glucosyltransferase	GO:0006488 dolichol-linked oligosaccharide biosynthetic process;GO:0006490 oligosaccharide-lipid intermediate biosynthetic process;GO:0006487 protein N-linked glycosylation		Potential drug targets; Disease related genes; Enzymes; ENZYME proteins:Transferases	Endoplasmic reticulum (Approved)				0	0	0	0	0	0	0	0	0	0	0	0	0	0	0	0	0	0	0	0
ALG8	79053	symbol	H. sapiens	79053	H. sapiens	ALG8	ALG8 alpha-1,3-glucosyltransferase	GO:0006488 dolichol-linked oligosaccharide biosynthetic process;GO:0006490 oligosaccharide-lipid intermediate biosynthetic process;GO:0018279 protein N-linked glycosylation via asparagine		Potential drug targets; Disease related genes; Enzymes; ENZYME proteins:Transferases	Nucleoplasm (Approved)				0	0	0	0	0	0	0	0	0	0	0	0	0	0	0	0	0	0	0	0
ALG9	79796	symbol	H. sapiens	79796	H. sapiens	ALG9	ALG9 alpha-1,2-mannosyltransferase	GO:0006488 dolichol-linked oligosaccharide biosynthetic process;GO:0006490 oligosaccharide-lipid intermediate biosynthetic process;GO:0097502 mannosylation		Disease related genes; ENZYME proteins:Transferases; Predicted intracellular proteins; Potential drug targets; Enzymes	Endoplasmic reticulum (Approved)				0	0	0	0	0	0	0	0	0	0	0	0	0	0	0	0	0	0	0	0
ALKBH1	8846	symbol	H. sapiens	8846	H. sapiens	ALKBH1	alkB homolog 1, histone H2A dioxygenase	GO:1990983 tRNA demethylation;GO:0002101 tRNA wobble cytosine modification;GO:0042245 RNA repair		ENZYME proteins:Oxidoreductases; Predicted intracellular proteins; ENZYME proteins:Lyases; Enzymes	Nucleoplasm (Supported); Additional: Endoplasmic reticulum				0	0	1	0	0	0	0	0	0	0	0	0	0	0	0	0	0	0	0	0
ALPK1	80216	symbol	H. sapiens	80216	H. sapiens	ALPK1	alpha kinase 1	GO:0002753 cytoplasmic pattern recognition receptor signaling pathway;GO:0002221 pattern recognition receptor signaling pathway;GO:0043123 positive regulation of I-kappaB kinase/NF-kappaB signaling	Atypical: Alpha-type protein kinase family	Kinases:Atypical kinases; Predicted intracellular proteins; Enzymes	Centrosome (Approved)				0	0	0	0	0	0	0	0	0	0	0	0	0	0	0	0	0	0	0	0
AMD1	262	symbol	H. sapiens	262	H. sapiens	AMD1	adenosylmethionine decarboxylase 1	GO:0006557 S-adenosylmethioninamine biosynthetic process;GO:0046499 S-adenosylmethioninamine metabolic process;GO:0006597 spermine biosynthetic process		Predicted intracellular proteins; ENZYME proteins:Lyases; Enzymes	Nucleoplasm (Approved)	Ademetionine; Putrescine; 5'-{[4-(aminooxy)butyl](methyl)amino}-5'-deoxy-8-ethenyladenosine		(M5941)HALLMARK UV RESPONSE UP; (M5901)HALLMARK G2M CHECKPOINT	0	0	0	0	0	0	0	0	0	0	0	0	0	0	0	0	0	0	0	0
ANAPC4	29945	symbol	H. sapiens	29945	H. sapiens	ANAPC4	anaphase promoting complex subunit 4	GO:0045842 positive regulation of mitotic metaphase/anaphase transition;GO:1901970 positive regulation of mitotic sister chromatid separation;GO:1902101 positive regulation of metaphase/anaphase transition of cell cycle		Predicted intracellular proteins	Intermediate filaments (Approved)				1	1	0	0	0	0	0	1	1	0	0	1	0	0	0	0	0	0	0	0
ANG	283	symbol	H. sapiens	283	H. sapiens	ANG	angiogenin	GO:0032431 activation of phospholipase A2 activity;GO:0032430 positive regulation of phospholipase A2 activity;GO:0006651 diacylglycerol biosynthetic process		Disease related genes; Predicted secreted proteins; Cancer-related genes:Candidate cancer biomarkers	Mitotic chromosome;Nucleoli;Nucleoli rim (Approved); Additional: Actin filaments			(M5946)HALLMARK COAGULATION; (M5921)HALLMARK COMPLEMENT; (M5937)HALLMARK GLYCOLYSIS	0	0	0	0	0	0	0	0	0	0	0	0	0	0	0	0	0	0	0	0
ANKRD49	54851	symbol	H. sapiens	54851	H. sapiens	ANKRD49	ankyrin repeat domain 49	GO:0007283 spermatogenesis;GO:0048232 male gamete generation;GO:0007276 gamete generation		Predicted intracellular proteins	Nucleoli;Nucleoplasm (Approved); Additional: Golgi apparatus				0	0	0	0	0	0	0	0	0	0	0	0	0	0	0	0	0	0	0	0
ANKRD6	22881	symbol	H. sapiens	22881	H. sapiens	ANKRD6	ankyrin repeat domain 6	GO:2000096 positive regulation of Wnt signaling pathway, planar cell polarity pathway;GO:2000052 positive regulation of non-canonical Wnt signaling pathway;GO:2000095 regulation of Wnt signaling pathway, planar cell polarity pathway		Predicted intracellular proteins	Vesicles (Enhanced)				0	0	0	0	0	0	0	0	0	0	0	0	0	0	0	0	0	0	0	0
ANLN	54443	symbol	H. sapiens	54443	H. sapiens	ANLN	anillin actin binding protein	GO:0000921 septin ring assembly;GO:1904170 regulation of bleb assembly;GO:1904172 positive regulation of bleb assembly		Predicted intracellular proteins; Disease related genes	Nucleoplasm (Enhanced); Additional: Midbody			(M5893)HALLMARK MITOTIC SPINDLE	1	1	0	1	0	0	0	1	0	0	0	0	0	0	0	0	0	0	0	0
ANP32E	81611	symbol	H. sapiens	81611	H. sapiens	ANP32E	acidic nuclear phosphoprotein 32 family member E	GO:0043486 histone exchange;GO:0034728 nucleosome organization;GO:0071824 protein-DNA complex subunit organization		Predicted intracellular proteins	Centrosome;Nucleoplasm (Enhanced); Additional: Cytosol			(M5910)HALLMARK PROTEIN SECRETION; (M5925)HALLMARK E2F TARGETS	0	0	0	0	0	0	0	0	0	0	0	0	0	0	0	0	0	0	0	0
ANXA1	301	symbol	H. sapiens	301	H. sapiens	ANXA1	annexin A1	GO:0014839 myoblast migration involved in skeletal muscle regeneration;GO:0033031 positive regulation of neutrophil apoptotic process;GO:0045629 negative regulation of T-helper 2 cell differentiation		Predicted intracellular proteins; Transporters:Transporter channels and pores; Cancer-related genes:Candidate cancer biomarkers; FDA approved drug targets:Small molecule drugs; Predicted secreted proteins	Cytosol;Plasma membrane (Enhanced); Additional: Nucleoplasm	Amcinonide; Fluocinolone acetonide; Hydrocortisone; Methylprednisolone; Clobetasol propionate; Budesonide; Dexamethasone; Hydrocortisone aceponate; Hydrocortisone acetate; Hydrocortisone butyrate; Hydrocortisone cypionate; Hydrocortisone phosphate; Hydrocortisone probutate; Hydrocortisone valerate; Prednisolone phosphate; Dexamethasone acetate; Betamethasone phosphate	(M5880)NABA ECM AFFILIATED; (M5885)NABA MATRISOME ASSOCIATED; (M5889)NABA MATRISOME	(M5946)HALLMARK COAGULATION; (M5902)HALLMARK APOPTOSIS	0	1	1	0	0	0	0	0	1	0	0	0	0	0	0	0	0	0	0	0
AP2B1	163	symbol	H. sapiens	163	H. sapiens	AP2B1	adaptor related protein complex 2 subunit beta 1	GO:0098884 postsynaptic neurotransmitter receptor internalization;GO:0140239 postsynaptic endocytosis;GO:0048268 clathrin coat assembly		Predicted intracellular proteins; Cancer-related genes:Candidate cancer biomarkers	Vesicles (Supported)			(M5910)HALLMARK PROTEIN SECRETION	0	0	0	0	0	0	0	0	0	0	0	0	0	0	0	0	0	0	0	0
AP3B1	8546	symbol	H. sapiens	8546	H. sapiens	AP3B1	adaptor related protein complex 3 subunit beta 1	GO:0090152 establishment of protein localization to mitochondrial membrane involved in mitochondrial fission;GO:0016182 synaptic vesicle budding from endosome;GO:0051138 positive regulation of NK T cell differentiation		Predicted intracellular proteins; Disease related genes	Nucleoplasm (Approved); Additional: Golgi apparatus			(M5910)HALLMARK PROTEIN SECRETION	0	1	0	0	1	0	0	0	0	1	0	0	0	0	0	0	0	0	0	0
APEX2	27301	symbol	H. sapiens	27301	H. sapiens	APEX2	apurinic/apyrimidinic endodeoxyribonuclease 2	GO:0006284 base-excision repair;GO:0090305 nucleic acid phosphodiester bond hydrolysis;GO:0006310 DNA recombination		Predicted intracellular proteins; ENZYME proteins:Lyases; Enzymes	Nucleoli fibrillar center;Nucleoplasm (Supported); Additional: Vesicles				0	0	1	0	0	0	0	0	0	0	0	0	0	0	0	0	0	0	0	0
APH1A	51107	symbol	H. sapiens	51107	H. sapiens	APH1A	aph-1 homolog A, gamma-secretase subunit	GO:0007220 Notch receptor processing;GO:0031293 membrane protein intracellular domain proteolysis;GO:0006509 membrane protein ectodomain proteolysis				E-2012	(M251)PID SYNDECAN 3 PATHWAY; (M70)PID PS1 PATHWAY; (M17)PID NOTCH PATHWAY	(M5903)HALLMARK NOTCH SIGNALING	0	0	0	0	0	0	0	0	0	0	0	0	0	0	0	0	0	0	0	0
APOBEC3B	9582	symbol	H. sapiens	9582	H. sapiens	APOBEC3B	apolipoprotein B mRNA editing enzyme catalytic subunit 3B	GO:0070383 DNA cytosine deamination;GO:0006216 cytidine catabolic process;GO:0009972 cytidine deamination		Predicted intracellular proteins; Cancer-related genes	Nucleoplasm (Approved)				0	0	0	0	1	0	0	0	0	0	0	0	0	0	0	0	0	0	0	0
APPL2	55198	symbol	H. sapiens	55198	H. sapiens	APPL2	adaptor protein, phosphotyrosine interacting with PH domain and leucine zipper 2	GO:1905303 positive regulation of macropinocytosis;GO:0009631 cold acclimation;GO:1905301 regulation of macropinocytosis		Predicted intracellular proteins; Disease related genes					0	1	0	0	0	0	0	0	0	0	0	0	0	0	0	0	0	0	0	0
AQP9	366	symbol	H. sapiens	366	H. sapiens	AQP9	aquaporin 9	GO:0015722 canalicular bile acid transport;GO:1904823 purine nucleobase transmembrane transport;GO:0015855 pyrimidine nucleobase transport		Transporters:Transporter channels and pores				(M5948)HALLMARK BILE ACID METABOLISM; (M5932)HALLMARK INFLAMMATORY RESPONSE; (M5934)HALLMARK XENOBIOTIC METABOLISM	0	0	0	0	0	0	0	0	0	0	0	0	0	0	0	0	0	0	0	0
ARCN1	372	symbol	H. sapiens	372	H. sapiens	ARCN1	archain 1	GO:0021691 cerebellar Purkinje cell layer maturation;GO:0021590 cerebellum maturation;GO:0021699 cerebellar cortex maturation		Predicted intracellular proteins; Disease related genes	Vesicles (Supported); Additional: Cytosol;Golgi apparatus			(M5910)HALLMARK PROTEIN SECRETION	0	0	0	0	0	0	0	0	0	1	0	0	0	0	0	0	0	0	0	0
ARG2	384	symbol	H. sapiens	384	H. sapiens	ARG2	arginase 2	GO:0071606 chemokine (C-C motif) ligand 4 production;GO:0071643 regulation of chemokine (C-C motif) ligand 4 production;GO:0071644 negative regulation of chemokine (C-C motif) ligand 4 production		Enzymes; Predicted intracellular proteins; ENZYME proteins:Hydrolases; Cancer-related genes:Candidate cancer biomarkers	Mitochondria (Supported)	Arginine; Ornithine; S-2-(Boronoethyl)-L-Cysteine		(M5934)HALLMARK XENOBIOTIC METABOLISM	0	0	0	0	0	0	0	0	0	0	0	0	0	0	0	0	0	0	0	0
ARHGAP11A	9824	symbol	H. sapiens	9824	H. sapiens	ARHGAP11A	Rho GTPase activating protein 11A	GO:0043547 positive regulation of GTPase activity;GO:0051056 regulation of small GTPase mediated signal transduction;GO:0043087 regulation of GTPase activity		Predicted intracellular proteins	Cytosol (Approved); Additional: Nucleoli				1	0	0	0	0	0	0	0	0	0	0	0	0	0	0	0	0	0	0	0
ARHGAP19	84986	symbol	H. sapiens	84986	H. sapiens	ARHGAP19	Rho GTPase activating protein 19	GO:0051056 regulation of small GTPase mediated signal transduction;GO:0007264 small GTPase mediated signal transduction;GO:1902531 regulation of intracellular signal transduction		Predicted intracellular proteins	Plasma membrane (Enhanced)				1	0	0	0	0	0	0	0	0	0	0	0	0	0	0	0	0	0	0	0
ARHGAP33	115703	symbol	H. sapiens	115703	H. sapiens	ARHGAP33	Rho GTPase activating protein 33	GO:0061001 regulation of dendritic spine morphogenesis;GO:0060997 dendritic spine morphogenesis;GO:0097061 dendritic spine organization		Predicted intracellular proteins	Plasma membrane (Approved); Additional: Actin filaments;Cytosol				1	0	0	0	0	0	0	0	0	0	0	0	0	0	0	0	0	0	0	0
ARID4A	5926	symbol	H. sapiens	5926	H. sapiens	ARID4A	AT-rich interaction domain 4A	GO:0097368 establishment of Sertoli cell barrier;GO:0034773 histone H4-K20 trimethylation;GO:0060009 Sertoli cell development		Predicted intracellular proteins; Transcription factors:Helix-turn-helix domains	Nucleoplasm (Supported); Additional: Cytosol;Plasma membrane			(M5901)HALLMARK G2M CHECKPOINT	0	0	0	0	0	0	0	0	0	0	0	0	1	0	0	0	0	0	0	0
ARL6IP1	23204	symbol	H. sapiens	23204	H. sapiens	ARL6IP1	ADP ribosylation factor like GTPase 6 interacting protein 1	GO:0002038 positive regulation of L-glutamate import across plasma membrane;GO:0071787 endoplasmic reticulum tubular network formation;GO:1990809 endoplasmic reticulum tubular network membrane organization		Predicted intracellular proteins; Disease related genes	Endoplasmic reticulum (Approved)			(M5898)HALLMARK DNA REPAIR	0	0	0	0	0	0	0	0	0	0	0	0	0	0	0	0	0	0	0	0
ASH2L	9070	symbol	H. sapiens	9070	H. sapiens	ASH2L	ASH2 like, histone lysine methyltransferase complex subunit	GO:0051568 histone H3-K4 methylation;GO:0043627 response to estrogen;GO:0034968 histone lysine methylation		Predicted intracellular proteins	Nucleoplasm (Supported); Additional: Plasma membrane				0	0	1	0	0	0	0	0	0	0	0	0	1	0	0	0	0	0	0	0
ASPM	259266	symbol	H. sapiens	259266	H. sapiens	ASPM	assembly factor for spindle microtubules	GO:0045769 negative regulation of asymmetric cell division;GO:0021873 forebrain neuroblast division;GO:0009786 regulation of asymmetric cell division		Cancer-related genes:Mutational cancer driver genes; Predicted intracellular proteins; Disease related genes	Cytosol;Plasma membrane (Approved)				0	1	0	1	0	0	1	0	0	1	0	0	0	0	0	0	0	0	0	0
ATAD2	29028	symbol	H. sapiens	29028	H. sapiens	ATAD2	ATPase family AAA domain containing 2	GO:0006325 chromatin organization;GO:0051276 chromosome organization;GO:0045944 positive regulation of transcription by RNA polymerase II		Predicted intracellular proteins; Enzymes; ENZYME proteins:Hydrolases	Nucleoplasm (Enhanced)			(M5925)HALLMARK E2F TARGETS	0	0	0	0	0	0	0	0	0	0	0	0	0	0	0	0	0	0	0	0
ATF6B	1388	symbol	H. sapiens	1388	H. sapiens	ATF6B	activating transcription factor 6 beta	GO:1903892 negative regulation of ATF6-mediated unfolded protein response;GO:1903891 regulation of ATF6-mediated unfolded protein response;GO:0036500 ATF6-mediated unfolded protein response		Transcription factors:Basic domains; Predicted intracellular proteins	Nucleoplasm (Approved); Additional: Nucleoli				0	0	0	0	0	0	0	1	0	0	0	0	0	0	0	0	0	0	0	0
ATF7	11016	symbol	H. sapiens	11016	H. sapiens	ATF7	activating transcription factor 7	GO:0045944 positive regulation of transcription by RNA polymerase II;GO:0045893 positive regulation of transcription, DNA-templated;GO:1903508 positive regulation of nucleic acid-templated transcription		Transcription factors:Basic domains; Predicted intracellular proteins	Cytosol;Nucleoplasm (Approved)		(M279)PID RB 1PATHWAY		0	0	0	0	0	0	0	0	0	0	0	0	0	0	0	0	0	0	0	0
ATG10	83734	symbol	H. sapiens	83734	H. sapiens	ATG10	autophagy related 10	GO:0006983 ER overload response;GO:0006984 ER-nucleus signaling pathway;GO:0006497 protein lipidation		Predicted intracellular proteins	Nucleoli (Approved); Additional: Nucleoplasm			(M5953)HALLMARK KRAS SIGNALING UP	0	0	0	0	0	0	0	0	0	0	0	0	0	0	0	0	0	0	0	0
ATG5	9474	symbol	H. sapiens	9474	H. sapiens	ATG5	autophagy related 5	GO:0039689 negative stranded viral RNA replication;GO:2000619 negative regulation of histone H4-K16 acetylation;GO:0061739 protein lipidation involved in autophagosome assembly		Transporters; Potential drug targets; Disease related genes; Predicted intracellular proteins	Centrosome (Approved)				0	0	0	0	0	0	0	0	0	0	0	0	1	0	0	0	0	0	0	0
ATL2	64225	symbol	H. sapiens	64225	H. sapiens	ATL2	atlastin GTPase 2	GO:1990809 endoplasmic reticulum tubular network membrane organization;GO:0090158 endoplasmic reticulum membrane organization;GO:0071786 endoplasmic reticulum tubular network organization		Predicted intracellular proteins	Endoplasmic reticulum (Supported)			(M5905)HALLMARK ADIPOGENESIS	0	0	0	0	0	0	0	0	0	0	0	0	0	0	0	0	0	0	0	0
ATP2A3	489	symbol	H. sapiens	489	H. sapiens	ATP2A3	ATPase sarcoplasmic/endoplasmic reticulum Ca2+ transporting 3	GO:1903515 calcium ion transport from cytosol to endoplasmic reticulum;GO:0046967 cytosol to endoplasmic reticulum transport;GO:1900121 negative regulation of receptor binding		Enzymes; ENZYME proteins:Hydrolases					0	0	0	0	0	0	0	0	0	0	0	0	0	0	0	0	0	0	0	0
ATP8B3	148229	symbol	H. sapiens	148229	H. sapiens	ATP8B3	ATPase phospholipid transporting 8B3	GO:0007339 binding of sperm to zona pellucida;GO:0045332 phospholipid translocation;GO:0035036 sperm-egg recognition		Enzymes; ENZYME proteins:Hydrolases					0	0	0	0	0	0	0	0	0	0	0	0	0	0	0	0	0	0	0	0
AURKA	6790	symbol	H. sapiens	6790	H. sapiens	AURKA	aurora kinase A	GO:1900195 positive regulation of oocyte maturation;GO:0007057 spindle assembly involved in female meiosis I;GO:0007056 spindle assembly involved in female meiosis	Other	ENZYME proteins:Transferases; Predicted intracellular proteins; Cancer-related genes:Candidate cancer biomarkers; Enzymes; Kinases	Centrosome;Cytosol;Nucleoplasm (Approved)	Phosphonothreonine; AT9283; CYC116; Alisertib; SNS-314; Cenisertib; Enzastaurin; 4-(4-METHYLPIPERAZIN-1-YL)-N-[5-(2-THIENYLACETYL)-1,5-DIHYDROPYRROLO[3,4-C]PYRAZOL-3-YL]BENZAMIDE; AKI-001; 1-{5-[2-(thieno[3,2-d]pyrimidin-4-ylamino)ethyl]-1,3-thiazol-2-yl}-3-[3-(trifluoromethyl)phenyl]urea; 1-(5-{2-[(1-methyl-1H-pyrazolo[4,3-d]pyrimidin-7-yl)amino]ethyl}-1,3-thiazol-2-yl)-3-[3-(trifluoromethyl)phe…	(M242)PID AURORA A PATHWAY; (M14)PID AURORA B PATHWAY; (M71)PID ILK PATHWAY	(M5951)HALLMARK SPERMATOGENESIS; (M5893)HALLMARK MITOTIC SPINDLE; (M5901)HALLMARK G2M CHECKPOINT	1	1	1	1	0	0	1	0	1	0	1	1	1	1	1	0	1	1	0	0
AURKB	9212	symbol	H. sapiens	9212	H. sapiens	AURKB	aurora kinase B	GO:1905115 regulation of lateral attachment of mitotic spindle microtubules to kinetochore;GO:1905116 positive regulation of lateral attachment of mitotic spindle microtubules to kinetochore;GO:0099607 lateral attachment of mitotic spindle microtubules to kinetochore	Other	Disease related genes; ENZYME proteins:Transferases; Predicted intracellular proteins; Potential drug targets; Cancer-related genes:Candidate cancer biomarkers; Enzymes; Kinases	Nucleoplasm (Enhanced); Additional: Midbody	Hesperidin; AT9283; Enzastaurin; Reversine; Fostamatinib	(M242)PID AURORA A PATHWAY; (M14)PID AURORA B PATHWAY; (M176)PID FOXM1 PATHWAY	(M5901)HALLMARK G2M CHECKPOINT; (M5925)HALLMARK E2F TARGETS	1	1	1	1	0	0	0	0	1	1	0	1	1	0	0	1	1	1	0	1
B2M	567	symbol	H. sapiens	567	H. sapiens	B2M	beta-2-microglobulin	GO:0002481 antigen processing and presentation of exogenous protein antigen via MHC class Ib, TAP-dependent;GO:0071283 cellular response to iron(III) ion;GO:1904432 regulation of ferrous iron binding		Disease related genes; Predicted intracellular proteins; Cancer-related genes:Mutational cancer driver genes; Cancer-related genes:Candidate cancer biomarkers; Cancer-related genes:Mutated cancer genes	Golgi apparatus;Plasma membrane (Enhanced); Additional: Cytosol	3-Indolebutyric Acid; N-Formylmethionine; Copper	(M88)PID CD8 TCR PATHWAY; (M54)PID IL12 2PATHWAY; (M272)PID CD8 TCR DOWNSTREAM PATHWAY	(M5911)HALLMARK INTERFERON ALPHA RESPONSE; (M5908)HALLMARK ANDROGEN RESPONSE; (M5913)HALLMARK INTERFERON GAMMA RESPONSE	0	1	0	0	0	0	0	0	0	0	0	1	0	0	0	0	0	0	0	0
BBS12	166379	symbol	H. sapiens	166379	H. sapiens	BBS12	Bardet-Biedl syndrome 12	GO:0051131 chaperone-mediated protein complex assembly;GO:0042755 eating behavior;GO:0042073 intraciliary transport		Predicted intracellular proteins; Disease related genes					0	0	0	0	0	0	0	0	0	0	0	0	0	1	0	0	0	0	0	0
BCL9	607	symbol	H. sapiens	607	H. sapiens	BCL9	BCL9 transcription coactivator	GO:0014908 myotube differentiation involved in skeletal muscle regeneration;GO:0043403 skeletal muscle tissue regeneration;GO:0035019 somatic stem cell population maintenance		Predicted intracellular proteins; Disease related genes; Cancer-related genes	Nuclear bodies;Nucleoplasm (Approved)		(M223)PID BETA CATENIN NUC PATHWAY; (M5493)WNT SIGNALING		0	0	0	0	0	0	0	0	0	0	0	0	0	0	0	0	0	0	0	0
BEND5	79656	symbol	H. sapiens	79656	H. sapiens	BEND5	BEN domain containing 5	GO:0045892 negative regulation of transcription, DNA-templated;GO:1903507 negative regulation of nucleic acid-templated transcription;GO:1902679 negative regulation of RNA biosynthetic process		Predicted intracellular proteins	Nuclear speckles (Approved); Additional: Cytosol				0	0	0	0	0	0	0	0	0	0	0	0	0	0	0	0	0	0	0	0
BFAR	51283	symbol	H. sapiens	51283	H. sapiens	BFAR	bifunctional apoptosis regulator	GO:1903895 negative regulation of IRE1-mediated unfolded protein response;GO:1903894 regulation of IRE1-mediated unfolded protein response;GO:1900102 negative regulation of endoplasmic reticulum unfolded protein response		Predicted intracellular proteins					0	0	0	0	0	0	0	0	0	0	0	0	0	0	0	0	0	0	0	0
BIRC5	332	symbol	H. sapiens	332	H. sapiens	BIRC5	baculoviral IAP repeat containing 5	GO:0043154 negative regulation of cysteine-type endopeptidase activity involved in apoptotic process;GO:2000117 negative regulation of cysteine-type endopeptidase activity;GO:0007605 sensory perception of sound		Predicted intracellular proteins; Cancer-related genes:Candidate cancer biomarkers	Cytokinetic bridge (Supported)	Reserpine; Berberine; LY2181308	(M242)PID AURORA A PATHWAY; (M14)PID AURORA B PATHWAY; (M176)PID FOXM1 PATHWAY	(M5893)HALLMARK MITOTIC SPINDLE; (M5901)HALLMARK G2M CHECKPOINT; (M5925)HALLMARK E2F TARGETS	1	1	1	0	0	0	0	0	0	0	0	0	0	0	0	0	0	1	0	0
BLZF1	8548	symbol	H. sapiens	8548	H. sapiens	BLZF1	basic leucine zipper nuclear factor 1	GO:0043001 Golgi to plasma membrane protein transport;GO:0006893 Golgi to plasma membrane transport;GO:0061951 establishment of protein localization to plasma membrane		Predicted intracellular proteins	Golgi apparatus (Supported); Additional: Nucleoplasm				1	0	0	0	0	0	0	0	0	0	0	0	0	0	0	0	0	0	0	0
BMF	90427	symbol	H. sapiens	90427	H. sapiens	BMF	Bcl2 modifying factor	GO:0090200 positive regulation of release of cytochrome c from mitochondria;GO:0043276 anoikis;GO:0090199 regulation of release of cytochrome c from mitochondria		Predicted intracellular proteins	Nucleoplasm (Approved)			(M5902)HALLMARK APOPTOSIS	0	0	0	0	0	0	0	0	0	0	0	0	0	0	0	0	0	0	0	0
BMS1P4	729096	symbol	H. sapiens	729096	H. sapiens	BMS1P4	BMS1 pseudogene 4								0	0	0	0	0	0	0	0	0	0	0	0	0	0	0	0	0	0	0	0
BORA	79866	symbol	H. sapiens	79866	H. sapiens	BORA	BORA aurora kinase A activator	GO:0060236 regulation of mitotic spindle organization;GO:0090224 regulation of spindle organization;GO:0007088 regulation of mitotic nuclear division		Predicted intracellular proteins	Nucleoli fibrillar center;Nucleoplasm (Approved); Additional: Cytosol		(M129)PID PLK1 PATHWAY		1	1	0	1	0	0	0	0	0	0	1	0	0	1	0	0	0	0	0	0
BRCC3	79184	symbol	H. sapiens	79184	H. sapiens	BRCC3	BRCA1/BRCA2-containing complex subunit 3	GO:0070537 histone H2A K63-linked deubiquitination;GO:0016578 histone deubiquitination;GO:0010165 response to X-ray		Disease related genes; Predicted intracellular proteins; Potential drug targets; Peptidases:Metallopeptidases; Enzymes	Nucleoplasm (Supported)	Zinc; Zinc acetate; Zinc chloride; Zinc sulfate, unspecified form			1	1	1	0	0	0	0	0	0	0	0	0	1	0	0	0	1	0	0	0
BRD8	10902	symbol	H. sapiens	10902	H. sapiens	BRD8	bromodomain containing 8	GO:0043968 histone H2A acetylation;GO:0097067 cellular response to thyroid hormone stimulus;GO:0097066 response to thyroid hormone		Predicted intracellular proteins	Nucleoplasm (Supported); Additional: Mitochondria				0	0	0	0	0	0	0	0	0	0	0	0	1	0	0	0	0	0	0	0
BRIP1	83990	symbol	H. sapiens	83990	H. sapiens	BRIP1	BRCA1 interacting helicase 1	GO:0010705 meiotic DNA double-strand break processing involved in reciprocal meiotic recombination;GO:0007284 spermatogonial cell division;GO:0000706 meiotic DNA double-strand break processing		Disease related genes; Predicted intracellular proteins; Potential drug targets; ENZYME proteins:Hydrolases; Enzymes; Cancer-related genes	Nuclear membrane;Nucleoplasm (Supported)		(M1)PID FANCONI PATHWAY		1	1	1	0	0	0	1	0	0	0	0	0	0	0	0	0	1	0	0	0
BTD	686	symbol	H. sapiens	686	H. sapiens	BTD	biotinidase	GO:0006768 biotin metabolic process;GO:0006767 water-soluble vitamin metabolic process;GO:0006766 vitamin metabolic process		Disease related genes; Predicted intracellular proteins; Potential drug targets; ENZYME proteins:Hydrolases; Predicted secreted proteins; Enzymes					0	0	0	0	0	0	0	0	0	0	0	0	0	0	0	0	0	0	0	0
BTG3	10950	symbol	H. sapiens	10950	H. sapiens	BTG3	BTG anti-proliferation factor 3	GO:0045930 negative regulation of mitotic cell cycle;GO:0045786 negative regulation of cell cycle;GO:0007346 regulation of mitotic cell cycle		Predicted intracellular proteins				(M5941)HALLMARK UV RESPONSE UP; (M5902)HALLMARK APOPTOSIS; (M5890)HALLMARK TNFA SIGNALING VIA NFKB	0	1	0	0	0	0	0	0	0	0	0	0	0	0	0	0	0	0	0	0
BTN2A1	11120	symbol	H. sapiens	11120	H. sapiens	BTN2A1	butyrophilin subfamily 2 member A1	GO:0050852 T cell receptor signaling pathway;GO:0050851 antigen receptor-mediated signaling pathway;GO:0002429 immune response-activating cell surface receptor signaling pathway		Predicted intracellular proteins	Plasma membrane (Approved)				0	0	0	0	0	0	0	0	0	0	0	0	0	0	0	0	0	0	0	0
BTN2A3P	54718	symbol	H. sapiens	54718	H. sapiens	BTN2A3P	butyrophilin subfamily 2 member A3, pseudogene	GO:0050852 T cell receptor signaling pathway;GO:0050851 antigen receptor-mediated signaling pathway;GO:0002429 immune response-activating cell surface receptor signaling pathway							0	0	0	0	0	0	0	0	0	0	0	0	0	0	0	0	0	0	0	0
BUB1	699	symbol	H. sapiens	699	H. sapiens	BUB1	BUB1 mitotic checkpoint serine/threonine kinase	GO:0051754 meiotic sister chromatid cohesion, centromeric;GO:0007135 meiosis II;GO:0045144 meiotic sister chromatid segregation	Other	Predicted intracellular proteins; Enzymes; Kinases; ENZYME proteins:Transferases	Nucleoplasm (Supported); Additional: Cytosol		(M14)PID AURORA B PATHWAY; (M129)PID PLK1 PATHWAY; (M19)PID P73PATHWAY	(M5951)HALLMARK SPERMATOGENESIS; (M5893)HALLMARK MITOTIC SPINDLE; (M5901)HALLMARK G2M CHECKPOINT	1	1	0	0	0	0	1	0	0	0	1	1	0	0	0	0	0	1	0	1
BUB1B	701	symbol	H. sapiens	701	H. sapiens	BUB1B	BUB1 mitotic checkpoint serine/threonine kinase B	GO:0051754 meiotic sister chromatid cohesion, centromeric;GO:0007135 meiosis II;GO:0045144 meiotic sister chromatid segregation	Other	Disease related genes; ENZYME proteins:Transferases; Predicted intracellular proteins; Cancer-related genes:Mutational cancer driver genes; Potential drug targets; Enzymes; Kinases	Cytosol (Supported)		(M129)PID PLK1 PATHWAY	(M5925)HALLMARK E2F TARGETS	1	1	0	0	0	0	1	0	0	0	1	1	0	0	0	1	0	0	0	1
BUD13	84811	symbol	H. sapiens	84811	H. sapiens	BUD13	BUD13 homolog	GO:0000377 RNA splicing, via transesterification reactions with bulged adenosine as nucleophile;GO:0000398 mRNA splicing, via spliceosome;GO:0000375 RNA splicing, via transesterification reactions		Predicted intracellular proteins	Nucleoplasm (Enhanced)				0	0	0	0	1	0	0	0	0	0	0	0	0	0	0	0	0	0	0	0
C10orf76	79591	gene_synonym	H. sapiens	79591	H. sapiens	ARMH3	armadillo like helical domain containing 3	GO:1903358 regulation of Golgi organization;GO:0007030 Golgi organization;GO:0010256 endomembrane system organization		Predicted intracellular proteins	Vesicles (Approved)				0	0	0	0	0	0	0	0	0	0	0	0	0	0	0	0	0	0	0	0
C11orf30	56946	gene_synonym	H. sapiens	56946	H. sapiens	EMSY	EMSY transcriptional repressor, BRCA2 interacting	GO:0006325 chromatin organization;GO:0006281 DNA repair;GO:0006974 cellular response to DNA damage stimulus		Predicted intracellular proteins	Nucleoplasm (Supported)				0	0	1	0	0	0	0	0	0	0	0	0	0	0	0	0	0	0	0	0
C11orf45	219833	gene_synonym	H. sapiens	219833	H. sapiens	KCNJ5-AS1	KCNJ5 antisense RNA 1			Predicted secreted proteins	Cytosol (Approved)				0	0	0	0	0	0	0	0	0	0	0	0	0	0	0	0	0	0	0	0
C11orf57	55216	gene_synonym	H. sapiens	55216	H. sapiens	NKAPD1	NKAP domain containing 1			Predicted intracellular proteins	Cytosol (Approved)				0	0	0	0	0	0	0	0	0	0	0	0	0	0	0	0	0	0	0	0
C11orf74	119710	gene_synonym	H. sapiens	119710	H. sapiens	IFTAP	intraflagellar transport associated protein	GO:0007340 acrosome reaction;GO:0007338 single fertilization;GO:0009566 fertilization		Predicted intracellular proteins	Aggresome;Cytosol (Approved)				0	0	0	0	0	0	0	0	0	0	0	0	0	0	0	0	0	0	0	0
C16orf70	80262	gene_synonym	H. sapiens	80262	H. sapiens	PHAF1	phagosome assembly factor 1	GO:0043001 Golgi to plasma membrane protein transport;GO:0006893 Golgi to plasma membrane transport;GO:0061951 establishment of protein localization to plasma membrane		Predicted intracellular proteins	Nuclear speckles (Approved); Additional: Cytosol;Nucleoli fibrillar center				0	0	0	0	0	0	0	0	0	0	0	0	0	0	0	0	0	0	0	0
C17orf80	55028	symbol	H. sapiens	55028	H. sapiens	C17orf80	chromosome 17 open reading frame 80	GO:0008150 biological_process		Predicted intracellular proteins	Nucleoplasm;Vesicles (Approved)				0	0	0	0	0	0	0	0	0	0	0	0	0	0	0	0	0	0	0	0
C17orf85	55421	gene_synonym	H. sapiens	55421	H. sapiens	NCBP3	nuclear cap binding subunit 3	GO:0006370 7-methylguanosine mRNA capping;GO:0009452 7-methylguanosine RNA capping;GO:0036260 RNA capping		Predicted intracellular proteins	Nuclear speckles (Approved)				0	0	0	0	1	0	0	0	0	0	0	0	0	0	0	0	0	0	0	0
C18orf54	162681	symbol	H. sapiens	162681	H. sapiens	C18orf54	chromosome 18 open reading frame 54	GO:0008285 negative regulation of cell population proliferation;GO:0042127 regulation of cell population proliferation;GO:0008283 cell population proliferation		Predicted intracellular proteins; Predicted secreted proteins	Nucleoplasm (Approved)				0	0	0	0	0	0	0	0	0	0	0	0	0	0	0	0	0	0	0	0
C18orf65	400658	gene_synonym	H. sapiens	400658	H. sapiens	ZNF516-DT	ZNF516 divergent transcript								0	0	0	0	0	0	0	0	0	0	0	0	0	0	0	0	0	0	0	0
C1orf112	55732	symbol	H. sapiens	55732	H. sapiens	C1orf112	chromosome 1 open reading frame 112			Predicted intracellular proteins	Mitochondria (Approved)				0	0	0	0	0	0	0	0	0	0	0	0	0	0	0	0	0	0	0	0
C2CD3	26005	symbol	H. sapiens	26005	H. sapiens	C2CD3	C2 domain containing 3 centriole elongation regulator	GO:0021997 neural plate axis specification;GO:0060896 neural plate pattern specification;GO:0061511 centriole elongation		Predicted intracellular proteins; Disease related genes	Centriolar satellite;Nucleoplasm (Approved)				0	0	0	1	0	0	0	0	0	0	0	0	0	1	1	0	0	0	0	0
C2CD5	9847	symbol	H. sapiens	9847	H. sapiens	C2CD5	C2 calcium dependent domain containing 5	GO:0038028 insulin receptor signaling pathway via phosphatidylinositol 3-kinase;GO:0031340 positive regulation of vesicle fusion;GO:0031338 regulation of vesicle fusion		Predicted intracellular proteins	Cytosol (Supported); Additional: Centriolar satellite				0	0	0	0	0	0	0	0	0	0	0	0	0	0	0	0	0	0	0	0
C2orf76	130355	symbol	H. sapiens	130355	H. sapiens	C2orf76	chromosome 2 open reading frame 76			Predicted intracellular proteins	Endoplasmic reticulum (Approved)				0	0	0	0	0	0	0	0	0	0	0	0	0	0	0	0	0	0	0	0
C3orf14	57415	symbol	H. sapiens	57415	H. sapiens	C3orf14	chromosome 3 open reading frame 14			Predicted intracellular proteins	Plasma membrane (Approved); Additional: Cytosol				0	0	0	0	0	0	0	0	0	0	0	0	0	0	0	0	0	0	0	0
C3orf67	200844	gene_synonym	H. sapiens	200844	H. sapiens	CFAP20DC	CFAP20 domain containing			Predicted intracellular proteins	Golgi apparatus (Approved)				0	0	0	0	0	0	0	0	0	0	0	0	0	0	0	0	0	0	0	0
C4orf29	80167	gene_synonym	H. sapiens	80167	H. sapiens	ABHD18	abhydrolase domain containing 18			Predicted intracellular proteins	Nuclear membrane (Approved)				0	0	0	0	0	0	0	0	0	0	0	0	0	0	0	0	0	0	0	0
C4orf33	132321	symbol	H. sapiens	132321	H. sapiens	C4orf33	chromosome 4 open reading frame 33			Predicted intracellular proteins	Golgi apparatus (Approved); Additional: Nuclear bodies				0	0	0	0	0	0	0	0	0	0	0	0	0	0	0	0	0	0	0	0
C5orf34	375444	symbol	H. sapiens	375444	H. sapiens	C5orf34	chromosome 5 open reading frame 34			Predicted intracellular proteins					0	0	0	0	0	0	0	0	0	0	0	0	0	0	0	0	0	0	0	0
C5orf51	285636	gene_synonym	H. sapiens	285636	H. sapiens	RIMOC1	RAB7A interacting MON1-CCZ1 complex subunit 1			Predicted intracellular proteins	Nucleoplasm (Enhanced); Additional: Cytosol				0	0	0	0	0	0	0	0	0	0	0	0	0	0	0	0	0	0	0	0
C5orf66	100996485	gene_synonym	H. sapiens	100996485	H. sapiens	PITX1-AS1	PITX1 antisense RNA 1								0	0	0	0	0	0	0	0	0	0	0	0	0	0	0	0	0	0	0	0
C7orf31	136895	symbol	H. sapiens	136895	H. sapiens	C7orf31	chromosome 7 open reading frame 31			Predicted intracellular proteins	Mitochondria;Nucleoplasm (Uncertain); Additional: Cytosol				0	0	0	0	0	0	0	0	0	0	0	0	0	0	0	0	0	0	0	0
CA5B	11238	symbol	H. sapiens	11238	H. sapiens	CA5B	carbonic anhydrase 5B	GO:0006730 one-carbon metabolic process;GO:0009617 response to bacterium;GO:0051707 response to other organism		Predicted intracellular proteins; ENZYME proteins:Lyases; Enzymes	Mitochondria (Supported)	Zonisamide; Ellagic acid			0	0	0	0	0	0	0	0	0	0	0	0	0	0	0	0	0	0	0	0
CA9	768	symbol	H. sapiens	768	H. sapiens	CA9	carbonic anhydrase 9	GO:0006730 one-carbon metabolic process;GO:0033574 response to testosterone;GO:1901654 response to ketone		Predicted intracellular proteins; ENZYME proteins:Lyases; Enzymes	Plasma membrane (Supported)	Benzthiazide; Hydroflumethiazide; Zonisamide; Girentuximab; Ellagic acid; Sodium carbonate	(M255)PID HIF1 TFPATHWAY		0	0	0	0	0	0	0	0	0	0	0	0	0	0	0	0	0	0	0	0
CABYR	26256	symbol	H. sapiens	26256	H. sapiens	CABYR	calcium binding tyrosine phosphorylation regulated	GO:0048240 sperm capacitation;GO:0003351 epithelial cilium movement involved in extracellular fluid movement;GO:0006858 extracellular transport		Predicted intracellular proteins	Cytosol;Nucleoplasm (Supported)				0	0	0	0	0	0	0	0	0	0	0	0	0	0	0	0	0	0	0	0
CACNA2D4	93589	symbol	H. sapiens	93589	H. sapiens	CACNA2D4	calcium voltage-gated channel auxiliary subunit alpha2delta 4	GO:0050908 detection of light stimulus involved in visual perception;GO:0050962 detection of light stimulus involved in sensory perception;GO:0009584 detection of visible light		Predicted intracellular proteins; Disease related genes					0	0	0	0	0	0	0	0	0	0	0	0	0	0	0	0	0	0	0	0
CALCOCO2	10241	symbol	H. sapiens	10241	H. sapiens	CALCOCO2	calcium binding and coiled-coil domain 2	GO:1901098 positive regulation of autophagosome maturation;GO:0098792 xenophagy;GO:1901096 regulation of autophagosome maturation		Predicted intracellular proteins	Cytosol (Supported); Additional: Vesicles				0	0	0	0	0	0	0	0	0	0	0	0	0	0	0	0	0	0	0	0
CALU	813	symbol	H. sapiens	813	H. sapiens	CALU	calumenin	GO:0008150 biological_process		Predicted intracellular proteins	Endoplasmic reticulum (Supported)			(M5930)HALLMARK EPITHELIAL MESENCHYMAL TRANSITION	0	0	0	0	0	0	0	0	0	0	0	0	0	0	0	0	0	0	0	0
CAMK2A	815	symbol	H. sapiens	815	H. sapiens	CAMK2A	calcium/calmodulin dependent protein kinase II alpha	GO:1990443 peptidyl-threonine autophosphorylation;GO:2000124 regulation of endocannabinoid signaling pathway;GO:0071926 endocannabinoid signaling pathway	CAMK Ser/Thr protein kinase family	Kinases:CAMK Ser/Thr protein kinases; Predicted intracellular proteins; Enzymes; ENZYME proteins:Transferases	Plasma membrane (Approved); Additional: Cell Junctions;Cytosol	Hexatantalum Dodecabromide; 1,4-Dithiothreitol; (2Z,3E)-2,3'-biindole-2',3(1H,1'H)-dione 3-{O-[(3R)-3,4-dihydroxybutyl]oxime}; Fostamatinib	(M23)PID WNT NONCANONICAL PATHWAY; (M108)PID NETRIN PATHWAY; (M271)PID PI3K PLC TRK PATHWAY		0	1	0	0	0	0	0	0	0	0	0	1	0	0	0	0	0	0	0	0
CAPN10-AS1	101752400	gene_synonym	H. sapiens	101752400	H. sapiens	CAPN10-DT	CAPN10 divergent transcript								0	0	0	0	0	0	0	0	0	0	0	0	0	0	0	0	0	0	0	0
CARD8	22900	symbol	H. sapiens	22900	H. sapiens	CARD8	caspase recruitment domain family member 8	GO:0097340 inhibition of cysteine-type endopeptidase activity;GO:0097341 zymogen inhibition;GO:1900226 negative regulation of NLRP3 inflammasome complex assembly		Predicted intracellular proteins	Nucleoplasm (Supported)				0	1	0	0	0	0	0	0	0	0	0	0	0	0	0	0	0	0	0	0
CARF	79800	symbol	H. sapiens	79800	H. sapiens	CARF	calcium responsive transcription factor	GO:0061400 positive regulation of transcription from RNA polymerase II promoter in response to calcium ion;GO:0035865 cellular response to potassium ion;GO:0035864 response to potassium ion		Predicted intracellular proteins	Vesicles (Approved); Additional: Cytosol;Nucleoli fibrillar center				0	0	0	0	0	0	0	0	0	0	0	0	0	0	0	0	0	0	0	0
CASC2	255082	symbol	H. sapiens	255082	H. sapiens	CASC2	cancer susceptibility 2	GO:0002357 defense response to tumor cell;GO:0002347 response to tumor cell;GO:0043280 positive regulation of cysteine-type endopeptidase activity involved in apoptotic process							0	0	0	0	0	0	0	0	0	0	0	0	0	0	0	0	0	0	0	0
CASC5	57082	gene_synonym	H. sapiens	57082	H. sapiens	KNL1	kinetochore scaffold 1	GO:0001675 acrosome assembly;GO:0034501 protein localization to kinetochore;GO:1903083 protein localization to condensed chromosome		Predicted intracellular proteins; Disease related genes; Cancer-related genes	Nucleoplasm (Enhanced); Additional: Nuclear bodies			(M5901)HALLMARK G2M CHECKPOINT	1	1	0	0	0	0	0	0	0	1	0	0	0	0	0	1	0	0	1	0
CASP8AP2	9994	symbol	H. sapiens	9994	H. sapiens	CASP8AP2	caspase 8 associated protein 2	GO:0036337 Fas signaling pathway;GO:0071260 cellular response to mechanical stimulus;GO:0006919 activation of cysteine-type endopeptidase activity involved in apoptotic process		Predicted intracellular proteins	Nuclear bodies;Nucleoli (Approved)		(M13096)SA PROGRAMMED CELL DEATH	(M5901)HALLMARK G2M CHECKPOINT	0	0	0	0	0	0	0	0	0	0	0	0	0	0	0	0	0	0	0	0
CBFA2T2	9139	symbol	H. sapiens	9139	H. sapiens	CBFA2T2	CBFA2/RUNX1 partner transcriptional co-repressor 2	GO:0060575 intestinal epithelial cell differentiation;GO:0045746 negative regulation of Notch signaling pathway;GO:0002065 columnar/cuboidal epithelial cell differentiation		Predicted intracellular proteins; Disease related genes	Nuclear speckles (Approved)				0	1	0	0	0	0	0	0	0	0	0	0	0	0	0	0	0	0	0	0
CBLL1	79872	symbol	H. sapiens	79872	H. sapiens	CBLL1	Cbl proto-oncogene like 1	GO:0080009 mRNA methylation;GO:0016556 mRNA modification;GO:0001510 RNA methylation		Predicted intracellular proteins; Enzymes; ENZYME proteins:Transferases	Nuclear speckles (Supported)		(M142)PID AJDISS 2PATHWAY		0	0	0	0	1	0	0	0	0	0	0	0	0	0	0	0	0	0	0	0
CBX1	10951	symbol	H. sapiens	10951	H. sapiens	CBX1	chromobox 1	GO:0006974 cellular response to DNA damage stimulus;GO:0045892 negative regulation of transcription, DNA-templated;GO:1903507 negative regulation of nucleic acid-templated transcription		Predicted intracellular proteins	Nuclear bodies;Nucleoplasm (Supported)			(M5901)HALLMARK G2M CHECKPOINT	0	0	1	0	0	0	0	0	0	0	0	0	0	0	0	0	0	0	0	0
CBX3	11335	symbol	H. sapiens	11335	H. sapiens	CBX3	chromobox 3	GO:0006338 chromatin remodeling;GO:0048511 rhythmic process;GO:0006325 chromatin organization		Predicted intracellular proteins	Nucleoplasm (Supported); Additional: Nuclear bodies			(M5928)HALLMARK MYC TARGETS V2; (M5926)HALLMARK MYC TARGETS V1	0	0	1	0	0	0	0	0	0	0	0	0	0	0	0	0	0	0	1	0
CCAR1	55749	symbol	H. sapiens	55749	H. sapiens	CCAR1	cell division cycle and apoptosis regulator 1	GO:0043065 positive regulation of apoptotic process;GO:0043068 positive regulation of programmed cell death;GO:0030335 positive regulation of cell migration		Cancer-related genes:Mutational cancer driver genes; Predicted intracellular proteins	Nucleoplasm (Supported); Additional: Golgi apparatus				0	0	0	0	1	0	0	0	0	0	0	0	0	0	0	0	0	0	0	0
CCDC14	64770	symbol	H. sapiens	64770	H. sapiens	CCDC14	coiled-coil domain containing 14	GO:0071539 protein localization to centrosome;GO:1905508 protein localization to microtubule organizing center;GO:0021762 substantia nigra development		Predicted intracellular proteins	Centrosome (Enhanced)				0	0	0	0	0	0	0	0	0	0	0	0	0	0	0	0	0	0	0	0
CCDC15	80071	symbol	H. sapiens	80071	H. sapiens	CCDC15	coiled-coil domain containing 15			Predicted intracellular proteins	Plasma membrane (Approved); Additional: Cytosol				0	0	0	0	0	0	0	0	0	0	0	0	0	0	0	0	0	0	0	0
CCDC150	284992	symbol	H. sapiens	284992	H. sapiens	CCDC150	coiled-coil domain containing 150			Predicted intracellular proteins	Nucleoplasm (Approved)				0	0	0	0	0	0	0	0	0	0	0	0	0	0	0	0	0	0	0	0
CCDC163P	126661	gene_synonym	H. sapiens	126661	H. sapiens	CCDC163	coiled-coil domain containing 163								0	0	0	0	0	0	0	0	0	0	0	0	0	0	0	0	0	0	0	0
CCDC176	80127	gene_synonym	H. sapiens	80127	H. sapiens	BBOF1	basal body orientation factor 1	GO:0044458 motile cilium assembly;GO:0060271 cilium assembly;GO:0044782 cilium organization		Predicted intracellular proteins	Nucleoplasm;Plasma membrane (Approved); Additional: Centriolar satellite				0	0	0	0	0	0	0	0	0	0	0	0	0	0	0	0	0	0	0	0
CCDC18	343099	symbol	H. sapiens	343099	H. sapiens	CCDC18	coiled-coil domain containing 18			Predicted intracellular proteins	Nucleoplasm (Approved); Additional: Cytosol				0	0	0	0	0	0	0	0	0	0	0	0	0	0	0	0	0	0	0	0
CCDC34	91057	symbol	H. sapiens	91057	H. sapiens	CCDC34	coiled-coil domain containing 34			Predicted intracellular proteins; Disease related genes	Nuclear membrane;Nucleoli fibrillar center (Approved)				0	0	0	0	0	0	0	0	0	0	0	0	0	0	0	0	0	0	0	0
CCDC53	51019	gene_synonym	H. sapiens	51019	H. sapiens	WASHC3	WASH complex subunit 3	GO:0030041 actin filament polymerization;GO:0008154 actin polymerization or depolymerization;GO:0051258 protein polymerization		Predicted intracellular proteins	Vesicles (Approved)				0	0	0	0	0	0	0	0	0	0	0	0	0	0	0	0	0	0	0	0
CCDC66	285331	symbol	H. sapiens	285331	H. sapiens	CCDC66	coiled-coil domain containing 66	GO:1903564 regulation of protein localization to cilium;GO:0050908 detection of light stimulus involved in visual perception;GO:0050962 detection of light stimulus involved in sensory perception		Predicted intracellular proteins	Centriolar satellite (Supported); Additional: Cell Junctions;Cytosol;Midbody ring				0	0	0	1	0	0	0	0	0	0	0	0	0	0	0	0	0	0	0	0
CCDC77	84318	symbol	H. sapiens	84318	H. sapiens	CCDC77	coiled-coil domain containing 77			Predicted intracellular proteins	Nuclear membrane (Approved)				0	0	0	0	0	0	0	0	0	0	0	0	0	0	0	0	0	0	0	0
CCDC82	79780	symbol	H. sapiens	79780	H. sapiens	CCDC82	coiled-coil domain containing 82			Predicted intracellular proteins	Nucleoplasm (Approved); Additional: Cytosol;Nuclear bodies				0	0	0	0	0	0	0	0	0	0	0	0	0	0	0	0	0	0	0	0
CCDC88A	55704	symbol	H. sapiens	55704	H. sapiens	CCDC88A	coiled-coil domain containing 88A	GO:0072658 maintenance of protein location in membrane;GO:0072660 maintenance of protein location in plasma membrane;GO:1903566 positive regulation of protein localization to cilium		Predicted intracellular proteins; Disease related genes				(M5893)HALLMARK MITOTIC SPINDLE	1	0	0	1	0	1	0	0	0	0	0	0	0	0	0	0	0	0	0	0
CCNA2	890	symbol	H. sapiens	890	H. sapiens	CCNA2	cyclin A2	GO:0071373 cellular response to luteinizing hormone stimulus;GO:0034699 response to luteinizing hormone;GO:0071314 cellular response to cocaine		Predicted intracellular proteins; Cancer-related genes:Candidate cancer biomarkers	Cytosol;Nucleoplasm (Enhanced)	4-(2,4-Dimethyl-Thiazol-5-Yl)-Pyrimidin-2-Ylamine; 6-O-Cyclohexylmethyl Guanine; [4-(2-Amino-4-Methyl-Thiazol-5-Yl)-Pyrimidin-2-Yl]-(3-Nitro-Phenyl)-Amine; 4-(2,4-Dimethyl-1,3-thiazol-5-yl)-N-[4-(trifluoromethyl)phenyl]-2-pyrimidinamine; 4-[(7-OXO-7H-THIAZOLO[5,4-E]INDOL-8-YLMETHYL)-AMINO]-N-PYRIDIN-2-YL-BENZENESULFONAMIDE; N-(3-cyclopropyl-1H-pyrazol-5-yl)-2-(2-naphthyl)acetamide; 2-ANILINO-6-CY…	(M3686)SA REG CASCADE OF CYCLIN EXPR; (M11)PID PRL SIGNALING EVENTS PATHWAY; (M234)PID IL2 STAT5 PATHWAY	(M5901)HALLMARK G2M CHECKPOINT; (M5926)HALLMARK MYC TARGETS V1	1	1	1	0	0	1	0	1	0	0	0	1	1	1	0	0	1	0	1	0
CCNB1	891	symbol	H. sapiens	891	H. sapiens	CCNB1	cyclin B1	GO:0046680 response to DDT;GO:2000775 histone H3-S10 phosphorylation involved in chromosome condensation;GO:0071283 cellular response to iron(III) ion		Predicted intracellular proteins; Transporters:Transporter channels and pores; Cancer-related genes:Candidate cancer biomarkers	Cytosol (Enhanced)		(M176)PID FOXM1 PATHWAY; (M129)PID PLK1 PATHWAY; (M136)PID FOXO PATHWAY		1	1	1	1	1	0	0	1	1	1	1	1	1	1	0	0	1	1	0	0
CCNB2	9133	symbol	H. sapiens	9133	H. sapiens	CCNB2	cyclin B2	GO:0007057 spindle assembly involved in female meiosis I;GO:0008315 G2/MI transition of meiotic cell cycle;GO:0007056 spindle assembly involved in female meiosis		Predicted intracellular proteins; Transporters:Transporter channels and pores; Cancer-related genes:Candidate cancer biomarkers	Cytosol (Enhanced); Additional: Golgi apparatus		(M176)PID FOXM1 PATHWAY; (M236)PID DELTA NP63 PATHWAY	(M5951)HALLMARK SPERMATOGENESIS; (M5893)HALLMARK MITOTIC SPINDLE; (M5901)HALLMARK G2M CHECKPOINT	1	1	1	1	0	0	1	1	0	0	0	1	0	1	0	0	1	1	0	0
CCNG2	901	symbol	H. sapiens	901	H. sapiens	CCNG2	cyclin G2	GO:0000079 regulation of cyclin-dependent protein serine/threonine kinase activity;GO:1904029 regulation of cyclin-dependent protein kinase activity;GO:0071900 regulation of protein serine/threonine kinase activity		Predicted intracellular proteins; Cancer-related genes:Candidate cancer biomarkers	Cytosol;Nucleoplasm (Approved)			(M5891)HALLMARK HYPOXIA; (M5905)HALLMARK ADIPOGENESIS	0	1	0	0	0	0	0	1	0	0	0	0	0	0	0	0	0	0	0	0
CCNT2-AS1	100129961	symbol	H. sapiens	100129961	H. sapiens	CCNT2-AS1	CCNT2 antisense RNA 1								0	0	0	0	0	0	0	0	0	0	0	0	0	0	0	0	0	0	0	0
CCP110	9738	symbol	H. sapiens	9738	H. sapiens	CCP110	centriolar coiled-coil protein 110	GO:1903723 negative regulation of centriole elongation;GO:0032053 ciliary basal body organization;GO:1903722 regulation of centriole elongation		Predicted intracellular proteins	Centrosome (Supported)			(M5925)HALLMARK E2F TARGETS; (M5939)HALLMARK P53 PATHWAY	1	1	0	1	0	0	0	0	0	0	0	0	0	1	1	0	0	0	0	0
CD109	135228	symbol	H. sapiens	135228	H. sapiens	CD109	CD109 molecule	GO:0072675 osteoclast fusion;GO:0072674 multinuclear osteoclast differentiation;GO:0010839 negative regulation of keratinocyte proliferation		CD markers	Plasma membrane (Supported); Additional: Cytosol		(M3468)NABA ECM REGULATORS; (M5885)NABA MATRISOME ASSOCIATED; (M5889)NABA MATRISOME		0	0	0	0	0	0	0	0	0	0	0	0	0	0	0	0	0	0	0	0
CD44	960	symbol	H. sapiens	960	H. sapiens	CD44	CD44 molecule (Indian blood group)	GO:1900623 regulation of monocyte aggregation;GO:1900625 positive regulation of monocyte aggregation;GO:0070487 monocyte aggregation		Blood group antigen proteins; CD markers; Predicted intracellular proteins; Cancer-related genes:Candidate cancer biomarkers; FDA approved drug targets:Small molecule drugs; Predicted secreted proteins	Plasma membrane (Supported); Additional: Golgi apparatus	Bivatuzumab; Hyaluronic acid	(M11736)SA MMP CYTOKINE CONNECTION; (M63)PID AVB3 OPN PATHWAY	(M5897)HALLMARK IL6 JAK STAT3 SIGNALING; (M5902)HALLMARK APOPTOSIS; (M5947)HALLMARK IL2 STAT5 SIGNALING	0	0	1	0	0	0	0	0	0	0	0	0	0	0	0	0	1	0	0	0
CD46	4179	symbol	H. sapiens	4179	H. sapiens	CD46	CD46 molecule	GO:0045959 negative regulation of complement activation, classical pathway;GO:0030450 regulation of complement activation, classical pathway;GO:0043382 positive regulation of memory T cell differentiation		CD markers; Disease related genes; Cancer-related genes:Candidate cancer biomarkers	Plasma membrane (Approved)			(M5921)HALLMARK COMPLEMENT	0	0	0	0	0	0	0	0	0	0	0	0	0	0	0	0	0	0	0	0
CDC20	991	symbol	H. sapiens	991	H. sapiens	CDC20	cell division cycle 20	GO:1905786 positive regulation of anaphase-promoting complex-dependent catabolic process;GO:1905784 regulation of anaphase-promoting complex-dependent catabolic process;GO:0090129 positive regulation of synapse maturation		Predicted intracellular proteins; Cancer-related genes:Candidate cancer biomarkers	Cytosol;Nucleoplasm (Enhanced)		(M129)PID PLK1 PATHWAY	(M5901)HALLMARK G2M CHECKPOINT; (M5907)HALLMARK ESTROGEN RESPONSE LATE; (M5925)HALLMARK E2F TARGETS	1	1	0	1	0	0	1	0	0	0	1	1	0	0	0	0	0	0	0	1
CDC23	8697	symbol	H. sapiens	8697	H. sapiens	CDC23	cell division cycle 23	GO:0045842 positive regulation of mitotic metaphase/anaphase transition;GO:1901970 positive regulation of mitotic sister chromatid separation;GO:1902101 positive regulation of metaphase/anaphase transition of cell cycle		Predicted intracellular proteins					1	1	0	0	0	0	0	1	1	1	0	1	0	0	0	0	0	0	0	0
CDC25C	995	symbol	H. sapiens	995	H. sapiens	CDC25C	cell division cycle 25C	GO:0110032 positive regulation of G2/MI transition of meiotic cell cycle;GO:0110030 regulation of G2/MI transition of meiotic cell cycle;GO:0008315 G2/MI transition of meiotic cell cycle		Enzymes; Predicted intracellular proteins; ENZYME proteins:Hydrolases; Cancer-related genes:Candidate cancer biomarkers	Nuclear speckles (Enhanced)		(M84)PID ATM PATHWAY; (M46)PID ATR PATHWAY; (M129)PID PLK1 PATHWAY		1	1	1	0	0	0	1	1	1	0	1	1	0	1	0	0	1	0	0	0
CDC27	996	symbol	H. sapiens	996	H. sapiens	CDC27	cell division cycle 27	GO:0045842 positive regulation of mitotic metaphase/anaphase transition;GO:1901970 positive regulation of mitotic sister chromatid separation;GO:1902101 positive regulation of metaphase/anaphase transition of cell cycle		Cancer-related genes:Mutated cancer genes; Predicted intracellular proteins	Nucleoplasm (Enhanced)			(M5893)HALLMARK MITOTIC SPINDLE; (M5901)HALLMARK G2M CHECKPOINT; (M5945)HALLMARK HEME METABOLISM	1	1	0	0	0	0	0	1	1	0	0	1	0	0	0	0	0	0	0	0
CDC5L	988	symbol	H. sapiens	988	H. sapiens	CDC5L	cell division cycle 5 like	GO:1904567 response to wortmannin;GO:1904568 cellular response to wortmannin;GO:1990646 cellular response to prolactin		Predicted intracellular proteins; Disease related genes; Transcription factors:Helix-turn-helix domains	Nucleoplasm (Supported)			(M5941)HALLMARK UV RESPONSE UP	0	1	1	0	1	0	0	0	0	0	0	0	0	0	0	0	1	0	0	0
CDC7	8317	symbol	H. sapiens	8317	H. sapiens	CDC7	cell division cycle 7	GO:0010571 positive regulation of nuclear cell cycle DNA replication;GO:2000105 positive regulation of DNA-dependent DNA replication;GO:0000727 double-strand break repair via break-induced replication	Other	Predicted intracellular proteins; Enzymes; Kinases; ENZYME proteins:Transferases	Nucleoplasm (Supported); Additional: Cytokinetic bridge;Mitotic spindle			(M5901)HALLMARK G2M CHECKPOINT	1	1	1	0	0	1	0	1	1	0	0	1	0	0	0	0	1	0	0	0
CDCA3	83461	symbol	H. sapiens	83461	H. sapiens	CDCA3	cell division cycle associated 3	GO:0051301 cell division;GO:0016567 protein ubiquitination;GO:0032446 protein modification by small protein conjugation		Predicted intracellular proteins	Cytosol (Approved)			(M5925)HALLMARK E2F TARGETS	0	1	0	0	0	0	0	0	0	0	0	0	0	0	0	0	0	0	0	0
CDCA5	113130	symbol	H. sapiens	113130	H. sapiens	CDCA5	cell division cycle associated 5	GO:0031536 positive regulation of exit from mitosis;GO:0071922 regulation of cohesin loading;GO:0071921 cohesin loading		Predicted intracellular proteins	Nucleoplasm (Enhanced)				1	1	1	0	0	0	0	1	1	1	0	0	0	0	0	1	0	1	0	1
CDCA8	55143	symbol	H. sapiens	55143	H. sapiens	CDCA8	cell division cycle associated 8	GO:0007080 mitotic metaphase plate congression;GO:0051310 metaphase plate congression;GO:0051303 establishment of chromosome localization		Predicted intracellular proteins	Nucleoli (Supported); Additional: Cytokinetic bridge;Nucleoplasm		(M14)PID AURORA B PATHWAY	(M5925)HALLMARK E2F TARGETS	1	1	0	0	0	0	0	0	0	1	0	0	0	0	0	0	0	1	0	0
CDK1	983	symbol	H. sapiens	983	H. sapiens	CDK1	cyclin dependent kinase 1	GO:0000741 karyogamy;GO:0007344 pronuclear fusion;GO:1905448 positive regulation of mitochondrial ATP synthesis coupled electron transport	CMGC Ser/Thr protein kinase family	ENZYME proteins:Transferases; Kinases:CMGC Ser/Thr protein kinases; Predicted intracellular proteins; Transporters:Transporter channels and pores; Cancer-related genes:Candidate cancer biomarkers; Enzymes	Cytosol (Supported); Additional: Nucleoplasm	Indirubin-3'-monoxime; Olomoucine; Hymenialdisine; SU9516; Alvocidib; Alsterpaullone; Seliciclib; AT-7519; Fostamatinib	(M10154)SA G2 AND M PHASES; (M207)PID RETINOIC ACID PATHWAY; (M176)PID FOXM1 PATHWAY	(M5923)HALLMARK PI3K AKT MTOR SIGNALING; (M5951)HALLMARK SPERMATOGENESIS; (M5893)HALLMARK MITOTIC SPINDLE	1	1	1	1	0	1	0	1	1	0	1	1	1	1	1	1	1	1	0	1
CDKN3	1033	symbol	H. sapiens	1033	H. sapiens	CDKN3	cyclin dependent kinase inhibitor 3	GO:0000079 regulation of cyclin-dependent protein serine/threonine kinase activity;GO:0035335 peptidyl-tyrosine dephosphorylation;GO:1904029 regulation of cyclin-dependent protein kinase activity		Disease related genes; Predicted intracellular proteins; Potential drug targets; ENZYME proteins:Hydrolases; Enzymes	Cytosol (Enhanced)			(M5951)HALLMARK SPERMATOGENESIS; (M5901)HALLMARK G2M CHECKPOINT; (M5925)HALLMARK E2F TARGETS	0	1	0	0	0	0	0	0	0	0	0	0	0	0	0	0	0	0	0	0
CDON	50937	symbol	H. sapiens	50937	H. sapiens	CDON	cell adhesion associated, oncogene regulated	GO:0045663 positive regulation of myoblast differentiation;GO:0045661 regulation of myoblast differentiation;GO:0045445 myoblast differentiation		Predicted intracellular proteins; Disease related genes			(M211)PID HEDGEHOG 2PATHWAY	(M5942)HALLMARK UV RESPONSE DN	0	0	0	0	0	0	0	0	0	0	0	0	0	0	0	0	0	0	0	0
CDR1	1038	symbol	H. sapiens	1038	H. sapiens	CDR1	cerebellar degeneration related protein 1								0	0	0	0	0	0	0	0	0	0	0	0	0	0	0	0	0	0	0	0
CENPA	1058	symbol	H. sapiens	1058	H. sapiens	CENPA	centromere protein A	GO:0051382 kinetochore assembly;GO:0051383 kinetochore organization;GO:0071459 protein localization to chromosome, centromeric region		Predicted intracellular proteins	Nucleoplasm (Supported)		(M242)PID AURORA A PATHWAY; (M14)PID AURORA B PATHWAY; (M176)PID FOXM1 PATHWAY	(M5901)HALLMARK G2M CHECKPOINT; (M5937)HALLMARK GLYCOLYSIS	1	1	0	1	0	0	0	0	0	1	0	0	0	0	0	1	0	1	1	0
CENPE	1062	symbol	H. sapiens	1062	H. sapiens	CENPE	centromere protein E	GO:0099606 microtubule plus-end directed mitotic chromosome migration;GO:0099607 lateral attachment of mitotic spindle microtubules to kinetochore;GO:0007079 mitotic chromosome movement towards spindle pole		Predicted intracellular proteins; Disease related genes	Cytosol;Microtubules (Approved); Additional: Nucleoplasm	GSK-923295	(M129)PID PLK1 PATHWAY	(M5893)HALLMARK MITOTIC SPINDLE; (M5901)HALLMARK G2M CHECKPOINT; (M5925)HALLMARK E2F TARGETS	1	1	0	1	0	0	0	0	0	1	1	0	0	0	0	0	0	0	0	0
CENPF	1063	symbol	H. sapiens	1063	H. sapiens	CENPF	centromere protein F	GO:0051382 kinetochore assembly;GO:0051383 kinetochore organization;GO:0021591 ventricular system development		Predicted intracellular proteins; Disease related genes; Cancer-related genes:Candidate cancer biomarkers	Nucleoplasm (Supported)		(M176)PID FOXM1 PATHWAY	(M5893)HALLMARK MITOTIC SPINDLE; (M5901)HALLMARK G2M CHECKPOINT	1	1	0	1	0	0	0	0	0	1	0	0	0	1	0	0	1	0	0	0
CENPH	64946	symbol	H. sapiens	64946	H. sapiens	CENPH	centromere protein H	GO:0051382 kinetochore assembly;GO:0051383 kinetochore organization;GO:0034508 centromere complex assembly		Predicted intracellular proteins	Nucleoli rim;Nucleoplasm (Supported); Additional: Mitotic chromosome				1	1	0	1	0	0	0	0	0	0	0	0	0	0	0	0	0	0	1	0
CENPI	2491	symbol	H. sapiens	2491	H. sapiens	CENPI	centromere protein I	GO:0034508 centromere complex assembly;GO:0065004 protein-DNA complex assembly;GO:0071824 protein-DNA complex subunit organization		Predicted intracellular proteins	Nuclear bodies (Supported); Additional: Cytosol				1	0	0	0	0	0	0	0	0	0	0	0	0	0	0	0	0	0	1	0
CENPJ	55835	symbol	H. sapiens	55835	H. sapiens	CENPJ	centromere protein J	GO:0030954 astral microtubule nucleation;GO:1903724 positive regulation of centriole elongation;GO:0051418 microtubule nucleation by microtubule organizing center		Predicted intracellular proteins; Disease related genes	Centrosome;Nucleoplasm;Plasma membrane (Approved)			(M5893)HALLMARK MITOTIC SPINDLE	1	1	1	1	0	0	0	0	1	0	0	0	0	1	1	0	0	0	0	0
CENPK	64105	symbol	H. sapiens	64105	H. sapiens	CENPK	centromere protein K	GO:0051382 kinetochore assembly;GO:0051383 kinetochore organization;GO:0034508 centromere complex assembly		Predicted intracellular proteins; Disease related genes					1	1	0	1	0	0	0	0	0	0	0	0	0	0	0	0	0	0	1	0
CENPL	91687	symbol	H. sapiens	91687	H. sapiens	CENPL	centromere protein L			Predicted intracellular proteins					1	0	0	0	0	0	0	0	0	0	0	0	0	0	0	0	0	0	1	0
CENPO	79172	symbol	H. sapiens	79172	H. sapiens	CENPO	centromere protein O	GO:0034508 centromere complex assembly;GO:0065004 protein-DNA complex assembly;GO:0071824 protein-DNA complex subunit organization		Predicted intracellular proteins	Nucleoplasm (Supported); Additional: Nuclear bodies				1	0	0	0	0	0	0	0	0	0	0	0	0	0	0	0	0	0	1	0
CENPQ	55166	symbol	H. sapiens	55166	H. sapiens	CENPQ	centromere protein Q	GO:1905340 regulation of protein localization to kinetochore;GO:1905342 positive regulation of protein localization to kinetochore;GO:0034501 protein localization to kinetochore		Predicted intracellular proteins	Nucleoplasm (Supported)				1	1	0	0	0	0	0	0	0	1	0	0	0	0	0	1	0	0	1	0
CENPU	79682	symbol	H. sapiens	79682	H. sapiens	CENPU	centromere protein U	GO:0043009 chordate embryonic development;GO:0009792 embryo development ending in birth or egg hatching;GO:0009790 embryo development		Predicted intracellular proteins	Centriolar satellite;Nucleoplasm (Supported)		(M129)PID PLK1 PATHWAY		1	0	0	0	0	0	0	0	0	0	1	0	0	0	0	0	0	0	1	0
CENPW	387103	symbol	H. sapiens	387103	H. sapiens	CENPW	centromere protein W	GO:0034080 CENP-A containing nucleosome assembly;GO:0061641 CENP-A containing chromatin organization;GO:0031055 chromatin remodeling at centromere		Predicted intracellular proteins	Nucleoplasm (Supported)				1	1	1	1	0	0	0	0	0	0	0	0	0	0	0	0	0	1	1	0
CEP112	201134	symbol	H. sapiens	201134	H. sapiens	CEP112	centrosomal protein 112	GO:0097120 receptor localization to synapse;GO:0031503 protein-containing complex localization;GO:0051179 localization		Predicted intracellular proteins	Golgi apparatus (Approved); Additional: Nucleoplasm				0	0	0	0	0	0	0	0	0	0	0	0	0	0	0	0	0	0	0	0
CEP120	153241	symbol	H. sapiens	153241	H. sapiens	CEP120	centrosomal protein 120	GO:0010825 positive regulation of centrosome duplication;GO:1903724 positive regulation of centriole elongation;GO:0022027 interkinetic nuclear migration		Predicted intracellular proteins; Disease related genes	Microtubules (Approved); Additional: Cytosol				0	1	0	1	0	0	0	0	1	1	0	0	0	0	1	0	0	0	0	0
CEP126	57562	symbol	H. sapiens	57562	H. sapiens	CEP126	centrosomal protein 126	GO:0031122 cytoplasmic microtubule organization;GO:1905515 non-motile cilium assembly;GO:0007052 mitotic spindle organization		Predicted intracellular proteins	Cytosol;Nucleoplasm (Uncertain)				0	1	0	1	0	0	0	0	0	0	0	0	0	0	0	0	0	0	0	0
CEP135	9662	symbol	H. sapiens	9662	H. sapiens	CEP135	centrosomal protein 135	GO:1902857 positive regulation of non-motile cilium assembly;GO:1902855 regulation of non-motile cilium assembly;GO:0010457 centriole-centriole cohesion		Predicted intracellular proteins; Disease related genes	Focal adhesion sites (Uncertain)				1	0	0	1	0	0	0	0	0	0	0	0	0	1	1	0	0	0	0	0
CEP162	22832	symbol	H. sapiens	22832	H. sapiens	CEP162	centrosomal protein 162	GO:0060271 cilium assembly;GO:0044782 cilium organization;GO:0120031 plasma membrane bounded cell projection assembly		Predicted intracellular proteins	Cytosol;Plasma membrane (Enhanced); Additional: Nucleoplasm				0	0	0	0	0	0	0	0	0	0	0	0	0	1	0	0	0	0	0	0
CEP192	55125	symbol	H. sapiens	55125	H. sapiens	CEP192	centrosomal protein 192	GO:0090222 centrosome-templated microtubule nucleation;GO:0051418 microtubule nucleation by microtubule organizing center;GO:0071539 protein localization to centrosome		Predicted intracellular proteins	Centrosome;Cytosol (Supported)			(M5893)HALLMARK MITOTIC SPINDLE	1	1	0	1	0	0	0	0	0	0	0	0	0	1	1	0	0	0	0	0
CEP290	80184	symbol	H. sapiens	80184	H. sapiens	CEP290	centrosomal protein 290	GO:0097711 ciliary basal body-plasma membrane docking;GO:1905349 ciliary transition zone assembly;GO:0030916 otic vesicle formation		Predicted intracellular proteins; Disease related genes	Centrosome (Supported)				1	0	0	0	0	0	0	0	0	1	0	0	0	1	0	0	0	0	0	0
CEP295	85459	symbol	H. sapiens	85459	H. sapiens	CEP295	centrosomal protein 295	GO:0010825 positive regulation of centrosome duplication;GO:1903724 positive regulation of centriole elongation;GO:0046601 positive regulation of centriole replication		Predicted intracellular proteins	Cytosol;Plasma membrane (Enhanced)				0	1	0	1	0	0	0	0	1	0	0	0	1	0	1	0	0	0	0	0
CEP55	55165	symbol	H. sapiens	55165	H. sapiens	CEP55	centrosomal protein 55	GO:0061952 midbody abscission;GO:1902410 mitotic cytokinetic process;GO:0032506 cytokinetic process		Predicted intracellular proteins; Disease related genes	Centriolar satellite;Plasma membrane (Supported); Additional: Midbody				0	1	0	0	0	0	0	0	0	1	0	0	0	0	0	0	0	0	0	0
CEP57	9702	symbol	H. sapiens	9702	H. sapiens	CEP57	centrosomal protein 57	GO:0034453 microtubule anchoring;GO:0008543 fibroblast growth factor receptor signaling pathway;GO:0044344 cellular response to fibroblast growth factor stimulus		Predicted intracellular proteins; Disease related genes	Microtubules (Approved); Additional: Cytosol			(M5893)HALLMARK MITOTIC SPINDLE	1	0	0	1	0	0	0	0	0	0	0	0	0	1	0	0	0	0	0	0
CEP57L1	285753	symbol	H. sapiens	285753	H. sapiens	CEP57L1	centrosomal protein 57 like 1	GO:0008150 biological_process		Predicted intracellular proteins	Cytosol;Plasma membrane (Approved)				0	0	0	0	0	0	0	0	0	0	0	0	0	0	0	0	0	0	0	0
CEP63	80254	symbol	H. sapiens	80254	H. sapiens	CEP63	centrosomal protein 63	GO:0097742 de novo centriole assembly;GO:0098535 de novo centriole assembly involved in multi-ciliated epithelial cell differentiation;GO:1903251 multi-ciliated epithelial cell differentiation		Predicted intracellular proteins; Disease related genes	Nucleoplasm (Approved)				1	1	1	1	0	0	0	0	0	0	0	0	0	1	1	0	1	0	0	0
CEP70	80321	symbol	H. sapiens	80321	H. sapiens	CEP70	centrosomal protein 70	GO:0070507 regulation of microtubule cytoskeleton organization;GO:0032886 regulation of microtubule-based process;GO:0060271 cilium assembly		Predicted intracellular proteins	Cytosol;Nucleoplasm (Approved); Additional: Centrosome				1	0	0	1	0	0	0	0	0	0	0	0	0	1	0	0	0	0	0	0
CEP95	90799	symbol	H. sapiens	90799	H. sapiens	CEP95	centrosomal protein 95			Predicted intracellular proteins	Nucleoplasm (Approved); Additional: Centrosome;Mitotic spindle;Vesicles				0	0	0	0	0	0	0	0	0	0	0	0	0	0	0	0	0	0	0	0
CETN2	1069	symbol	H. sapiens	1069	H. sapiens	CETN2	centrin 2	GO:0007099 centriole replication;GO:0098534 centriole assembly;GO:0006289 nucleotide-excision repair		Predicted intracellular proteins				(M5898)HALLMARK DNA REPAIR	1	1	1	1	0	0	0	0	0	0	0	0	0	1	1	0	0	0	0	0
CETN3	1070	symbol	H. sapiens	1070	H. sapiens	CETN3	centrin 3	GO:0051028 mRNA transport;GO:0007098 centrosome cycle;GO:0031023 microtubule organizing center organization		Predicted intracellular proteins	Centrosome (Supported)				0	1	0	1	0	0	0	0	0	0	0	0	0	0	1	0	0	0	0	0
CFAP126	257177	symbol	H. sapiens	257177	H. sapiens	CFAP126	cilia and flagella associated protein 126	GO:0044782 cilium organization;GO:0120036 plasma membrane bounded cell projection organization;GO:0030030 cell projection organization		Predicted intracellular proteins					0	0	0	0	0	0	0	0	0	0	0	0	0	0	0	0	0	0	0	0
CFAP44	55779	symbol	H. sapiens	55779	H. sapiens	CFAP44	cilia and flagella associated protein 44	GO:0007288 sperm axoneme assembly;GO:0120316 sperm flagellum assembly;GO:0044458 motile cilium assembly		Predicted intracellular proteins					0	0	0	1	0	0	0	0	0	0	0	0	0	0	0	0	0	0	0	0
CFDP1	10428	symbol	H. sapiens	10428	H. sapiens	CFDP1	craniofacial development protein 1	GO:2000270 negative regulation of fibroblast apoptotic process;GO:2000269 regulation of fibroblast apoptotic process;GO:0044346 fibroblast apoptotic process		Predicted intracellular proteins	Nucleoplasm (Approved); Additional: Vesicles				0	0	0	0	0	0	0	0	0	0	0	0	0	0	0	0	0	0	0	0
CHAF1B	8208	symbol	H. sapiens	8208	H. sapiens	CHAF1B	chromatin assembly factor 1 subunit B	GO:0006335 DNA replication-dependent nucleosome assembly;GO:0034723 DNA replication-dependent nucleosome organization;GO:0006334 nucleosome assembly		Predicted intracellular proteins	Nucleoplasm (Supported)				0	0	1	0	0	1	0	0	0	0	0	0	0	0	0	0	0	1	0	0
CHAMP1	283489	symbol	H. sapiens	283489	H. sapiens	CHAMP1	chromosome alignment maintaining phosphoprotein 1	GO:0031134 sister chromatid biorientation;GO:0051315 attachment of mitotic spindle microtubules to kinetochore;GO:0035372 protein localization to microtubule		Predicted intracellular proteins; Disease related genes	Nucleoplasm (Enhanced); Additional: Midbody ring;Nuclear bodies				0	1	0	0	0	0	0	0	0	1	0	0	0	0	0	1	0	0	0	0
CHD1L	9557	symbol	H. sapiens	9557	H. sapiens	CHD1L	chromodomain helicase DNA binding protein 1 like	GO:0032508 DNA duplex unwinding;GO:0032392 DNA geometric change;GO:0006338 chromatin remodeling		Predicted intracellular proteins; Enzymes; ENZYME proteins:Hydrolases	Nucleoplasm (Supported)				0	0	1	0	0	0	0	0	0	0	0	0	0	0	0	0	0	0	0	0
CHEK1	1111	symbol	H. sapiens	1111	H. sapiens	CHEK1	checkpoint kinase 1	GO:0010767 regulation of transcription from RNA polymerase II promoter in response to UV-induced DNA damage;GO:0035407 histone H3-T11 phosphorylation;GO:0035405 histone-threonine phosphorylation	CAMK Ser/Thr protein kinase family	ENZYME proteins:Transferases; Predicted intracellular proteins; Cancer-related genes:Candidate cancer biomarkers; Kinases:CAMK Ser/Thr protein kinases; Enzymes	Nucleoplasm (Supported); Additional: Vesicles	XL844; Enzastaurin; CHIR-124; N-{5-[4-(4-METHYLPIPERAZIN-1-YL)PHENYL]-1H-PYRROLO[2,3-B]PYRIDIN-3-YL}NICOTINAMIDE; 3-(5-{[4-(AMINOMETHYL)PIPERIDIN-1-YL]METHYL}-1H-INDOL-2-YL)QUINOLIN-2(1H)-ONE; 2,2'-{[9-(HYDROXYIMINO)-9H-FLUORENE-2,7-DIYL]BIS(OXY)}DIACETIC ACID; (2S)-1-AMINO-3-[(5-NITROQUINOLIN-8-YL)AMINO]PROPAN-2-OL; 2-(cyclohexylamino)benzoic acid; 3-(5-{[4-(AMINOMETHYL)PIPERIDIN-1-YL]METHYL}-1H…	(M10154)SA G2 AND M PHASES; (M95)PID CIRCADIAN PATHWAY; (M46)PID ATR PATHWAY	(M5901)HALLMARK G2M CHECKPOINT; (M5925)HALLMARK E2F TARGETS	1	1	1	1	0	1	0	1	1	0	0	1	1	0	1	0	1	0	0	0
CHI3L2	1117	symbol	H. sapiens	1117	H. sapiens	CHI3L2	chitinase 3 like 2	GO:0006030 chitin metabolic process;GO:0006032 chitin catabolic process;GO:1901072 glucosamine-containing compound catabolic process		Predicted intracellular proteins; Predicted secreted proteins					0	0	0	0	0	0	0	0	0	0	0	0	0	0	0	0	0	0	0	0
CHRNA9	55584	symbol	H. sapiens	55584	H. sapiens	CHRNA9	cholinergic receptor nicotinic alpha 9 subunit	GO:0050910 detection of mechanical stimulus involved in sensory perception of sound;GO:0050974 detection of mechanical stimulus involved in sensory perception;GO:0050982 detection of mechanical stimulus				Nicotine; Ethanol; ATG003; Lobeline; RPI-78M; Tetraethylammonium			0	0	0	0	0	0	0	0	0	0	0	0	0	0	0	0	0	0	0	0
CHTF8	54921	symbol	H. sapiens	54921	H. sapiens	CHTF8	chromosome transmission fidelity factor 8	GO:1900262 regulation of DNA-directed DNA polymerase activity;GO:1900264 positive regulation of DNA-directed DNA polymerase activity;GO:0007064 mitotic sister chromatid cohesion		Predicted intracellular proteins	Nucleoplasm (Enhanced)				1	1	1	0	0	1	0	0	0	0	0	0	0	0	0	0	0	0	1	1
CIB2	10518	symbol	H. sapiens	10518	H. sapiens	CIB2	calcium and integrin binding family member 2	GO:0071318 cellular response to ATP;GO:0033198 response to ATP;GO:0045494 photoreceptor cell maintenance		Predicted intracellular proteins; Disease related genes; Cancer-related genes:Candidate cancer biomarkers		Calcium citrate; Calcium Phosphate; Calcium phosphate dihydrate			0	0	0	0	0	0	0	0	0	0	0	0	0	0	0	0	0	0	0	0
CIT	11113	symbol	H. sapiens	11113	H. sapiens	CIT	citron rho-interacting serine/threonine kinase	GO:0035331 negative regulation of hippo signaling;GO:0035330 regulation of hippo signaling;GO:0035329 hippo signaling	AGC Ser/Thr protein kinase family	Disease related genes; Kinases:AGC Ser/Thr protein kinases; ENZYME proteins:Transferases; Predicted intracellular proteins; Potential drug targets; Enzymes	Cytosol (Approved)	Fostamatinib	(M12)PID RHOA PATHWAY	(M5925)HALLMARK E2F TARGETS	1	1	0	0	0	0	0	0	1	0	0	0	0	0	0	0	0	0	0	0
CKAP2	26586	symbol	H. sapiens	26586	H. sapiens	CKAP2	cytoskeleton associated protein 2	GO:0007026 negative regulation of microtubule depolymerization;GO:0031114 regulation of microtubule depolymerization;GO:0031111 negative regulation of microtubule polymerization or depolymerization		Predicted intracellular proteins	Microtubules (Enhanced); Additional: Cytosol				0	1	0	1	0	0	0	0	0	0	0	0	0	0	0	0	0	0	0	0
CKAP2L	150468	symbol	H. sapiens	150468	H. sapiens	CKAP2L	cytoskeleton associated protein 2 like			Predicted intracellular proteins; Disease related genes	Mitotic spindle (Supported); Additional: Cytosol				0	0	0	0	0	0	0	0	0	0	0	0	0	0	0	0	0	0	0	0
CKAP5	9793	symbol	H. sapiens	9793	H. sapiens	CKAP5	cytoskeleton associated protein 5	GO:0030951 establishment or maintenance of microtubule cytoskeleton polarity;GO:0030952 establishment or maintenance of cytoskeleton polarity;GO:0090063 positive regulation of microtubule nucleation		Predicted intracellular proteins	Centrosome;Plasma membrane (Approved); Additional: Nucleoli;Nucleoli rim		(M242)PID AURORA A PATHWAY; (M71)PID ILK PATHWAY	(M5893)HALLMARK MITOTIC SPINDLE	1	1	0	1	0	0	0	0	0	0	0	0	0	1	1	0	0	0	0	0
CKS2	1164	symbol	H. sapiens	1164	H. sapiens	CKS2	CDC28 protein kinase regulatory subunit 2	GO:0045737 positive regulation of cyclin-dependent protein serine/threonine kinase activity;GO:1904031 positive regulation of cyclin-dependent protein kinase activity;GO:0000079 regulation of cyclin-dependent protein serine/threonine kinase activity		Predicted intracellular proteins; Cancer-related genes:Candidate cancer biomarkers	Cytosol;Mitochondria (Approved); Additional: Nucleoplasm;Vesicles			(M5901)HALLMARK G2M CHECKPOINT; (M5925)HALLMARK E2F TARGETS	0	1	0	0	0	0	1	0	1	0	0	0	0	0	0	0	0	0	0	0
CLIC2	1193	symbol	H. sapiens	1193	H. sapiens	CLIC2	chloride intracellular channel 2	GO:0060315 negative regulation of ryanodine-sensitive calcium-release channel activity;GO:0051280 negative regulation of release of sequestered calcium ion into cytosol;GO:0051284 positive regulation of sequestering of calcium ion		Potential drug targets; Disease related genes; Transporters:Transporter channels and pores; Predicted intracellular proteins	Cytosol;Plasma membrane (Supported); Additional: Nucleoplasm			(M5945)HALLMARK HEME METABOLISM	0	0	0	0	0	0	0	0	0	0	0	0	0	0	0	0	0	0	0	0
CLIP1	6249	symbol	H. sapiens	6249	H. sapiens	CLIP1	CAP-Gly domain containing linker protein 1	GO:0031116 positive regulation of microtubule polymerization;GO:0031112 positive regulation of microtubule polymerization or depolymerization;GO:0031113 regulation of microtubule polymerization		Cancer-related genes:Mutational cancer driver genes; Predicted intracellular proteins; Cancer-related genes:Candidate cancer biomarkers	Cytosol;Microtubule ends (Supported)		(M163)PID LIS1 PATHWAY; (M121)PID MTOR 4PATHWAY	(M5893)HALLMARK MITOTIC SPINDLE	1	0	0	1	0	0	0	0	0	0	0	0	0	0	0	0	0	0	0	0
CLK1	1195	symbol	H. sapiens	1195	H. sapiens	CLK1	CDC like kinase 1	GO:0018107 peptidyl-threonine phosphorylation;GO:0018210 peptidyl-threonine modification;GO:0043484 regulation of RNA splicing	CMGC Ser/Thr protein kinase family	Kinases:CMGC Ser/Thr protein kinases; Predicted intracellular proteins; Enzymes; ENZYME proteins:Transferases	Nuclear membrane;Nucleoplasm (Supported)	Debromohymenialdisine; CHGN111; ethyl 3-[(E)-2-amino-1-cyanoethenyl]-6,7-dichloro-1-methyl-1H-indole-2-carboxylate; Fostamatinib			0	0	0	0	1	0	0	0	0	0	0	0	0	0	0	0	0	0	0	0
CLK4	57396	symbol	H. sapiens	57396	H. sapiens	CLK4	CDC like kinase 4	GO:0043484 regulation of RNA splicing;GO:0046777 protein autophosphorylation;GO:0018108 peptidyl-tyrosine phosphorylation	CMGC Ser/Thr protein kinase family	Kinases:CMGC Ser/Thr protein kinases; Predicted intracellular proteins; Enzymes; ENZYME proteins:Transferases	Actin filaments (Approved)	Fostamatinib			0	0	0	0	1	0	0	0	0	0	0	0	0	0	0	0	0	0	0	0
CLOCK	9575	symbol	H. sapiens	9575	H. sapiens	CLOCK	clock circadian regulator	GO:2000323 negative regulation of glucocorticoid receptor signaling pathway;GO:2000322 regulation of glucocorticoid receptor signaling pathway;GO:2000074 regulation of type B pancreatic cell development		Transcription factors:Basic domains; Predicted intracellular proteins; Enzymes; ENZYME proteins:Transferases	Nucleoplasm (Enhanced); Additional: Vesicles		(M95)PID CIRCADIAN PATHWAY		0	1	1	0	0	0	0	0	0	0	0	0	1	0	0	0	1	0	0	0
CLPX	10845	symbol	H. sapiens	10845	H. sapiens	CLPX	caseinolytic mitochondrial matrix peptidase chaperone subunit X	GO:0010952 positive regulation of peptidase activity;GO:0006457 protein folding;GO:0046034 ATP metabolic process		Predicted intracellular proteins	Mitochondria (Supported); Additional: Cytosol;Nucleoplasm				0	0	0	0	0	0	0	0	0	0	0	0	0	0	0	0	0	0	0	0
CNOT2	4848	symbol	H. sapiens	4848	H. sapiens	CNOT2	CCR4-NOT transcription complex subunit 2	GO:0010606 positive regulation of cytoplasmic mRNA processing body assembly;GO:0010603 regulation of cytoplasmic mRNA processing body assembly;GO:0033147 negative regulation of intracellular estrogen receptor signaling pathway		Predicted intracellular proteins	Nucleoplasm (Approved); Additional: Cytosol			(M5922)HALLMARK UNFOLDED PROTEIN RESPONSE	0	0	1	1	1	0	0	0	0	0	0	0	0	0	0	0	0	0	0	0
CNOT6	57472	symbol	H. sapiens	57472	H. sapiens	CNOT6	CCR4-NOT transcription complex subunit 6	GO:0070966 nuclear-transcribed mRNA catabolic process, no-go decay;GO:0010606 positive regulation of cytoplasmic mRNA processing body assembly;GO:0010603 regulation of cytoplasmic mRNA processing body assembly		Predicted intracellular proteins; Enzymes; ENZYME proteins:Hydrolases	Cytosol (Approved)			(M5922)HALLMARK UNFOLDED PROTEIN RESPONSE	0	0	0	1	1	0	0	0	0	0	0	0	0	0	0	0	0	0	0	0
CNOT8	9337	symbol	H. sapiens	9337	H. sapiens	CNOT8	CCR4-NOT transcription complex subunit 8	GO:0043928 exonucleolytic catabolism of deadenylated mRNA;GO:0000291 nuclear-transcribed mRNA catabolic process, exonucleolytic;GO:0090503 RNA phosphodiester bond hydrolysis, exonucleolytic		Predicted intracellular proteins; Enzymes; ENZYME proteins:Hydrolases					0	0	1	0	1	0	0	0	0	0	0	0	0	0	0	0	0	0	0	0
CNPY4	245812	symbol	H. sapiens	245812	H. sapiens	CNPY4	canopy FGF signaling regulator 4	GO:1903078 positive regulation of protein localization to plasma membrane;GO:1904377 positive regulation of protein localization to cell periphery;GO:1903076 regulation of protein localization to plasma membrane		Predicted intracellular proteins	Vesicles (Approved)				0	0	0	0	0	0	0	0	0	0	0	0	0	0	0	0	0	0	0	0
CNRIP1	25927	symbol	H. sapiens	25927	H. sapiens	CNRIP1	cannabinoid receptor interacting protein 1	GO:2000272 negative regulation of signaling receptor activity;GO:0010469 regulation of signaling receptor activity;GO:0044092 negative regulation of molecular function		Predicted intracellular proteins	Cytosol (Approved)				0	0	0	0	0	0	0	0	0	0	0	0	0	0	0	0	0	0	0	0
CNTRL	11064	symbol	H. sapiens	11064	H. sapiens	CNTRL	centriolin	GO:0060976 coronary vasculature development;GO:0035904 aorta development;GO:0003281 ventricular septum development		Predicted intracellular proteins; Disease related genes; Cancer-related genes	Centrosome (Supported); Additional: Cytosol			(M5893)HALLMARK MITOTIC SPINDLE	1	1	0	0	0	0	0	0	0	0	0	0	0	1	0	0	0	0	0	0
COIL	8161	symbol	H. sapiens	8161	H. sapiens	COIL	coilin	GO:0000387 spliceosomal snRNP assembly;GO:0022618 ribonucleoprotein complex assembly;GO:0071826 ribonucleoprotein complex subunit organization		Predicted intracellular proteins	Nuclear bodies (Supported); Additional: Nucleoli;Nucleoli fibrillar center;Nucleoplasm			(M5951)HALLMARK SPERMATOGENESIS	0	0	0	0	1	0	0	0	0	0	0	0	0	0	0	0	0	0	0	0
COL24A1	255631	symbol	H. sapiens	255631	H. sapiens	COL24A1	collagen type XXIV alpha 1 chain	GO:0030198 extracellular matrix organization;GO:0043062 extracellular structure organization;GO:0045229 external encapsulating structure organization		Predicted secreted proteins			(M3005)NABA COLLAGENS; (M166)PID ATF2 PATHWAY; (M5884)NABA CORE MATRISOME		0	0	0	0	0	0	0	0	0	0	0	0	0	0	0	0	0	0	0	0
COL27A1	85301	symbol	H. sapiens	85301	H. sapiens	COL27A1	collagen type XXVII alpha 1 chain	GO:0003431 growth plate cartilage chondrocyte development;GO:0003433 chondrocyte development involved in endochondral bone morphogenesis;GO:0003418 growth plate cartilage chondrocyte differentiation		Predicted intracellular proteins; Disease related genes; Predicted secreted proteins			(M3005)NABA COLLAGENS; (M5884)NABA CORE MATRISOME; (M5889)NABA MATRISOME		0	0	0	0	0	0	0	0	0	0	0	0	0	0	0	0	0	0	0	0
COL6A3	1293	symbol	H. sapiens	1293	H. sapiens	COL6A3	collagen type VI alpha 3 chain	GO:0010951 negative regulation of endopeptidase activity;GO:0010466 negative regulation of peptidase activity;GO:0007517 muscle organ development		Predicted intracellular proteins; Disease related genes; Predicted secreted proteins	Endoplasmic reticulum (Approved); Additional: Vesicles		(M5887)NABA BASEMENT MEMBRANES; (M3005)NABA COLLAGENS; (M198)PID SYNDECAN 1 PATHWAY	(M5909)HALLMARK MYOGENESIS; (M5930)HALLMARK EPITHELIAL MESENCHYMAL TRANSITION	0	0	0	0	0	0	0	0	0	0	0	0	0	0	0	0	0	0	0	0
COL7A1	1294	symbol	H. sapiens	1294	H. sapiens	COL7A1	collagen type VII alpha 1 chain	GO:0035987 endodermal cell differentiation;GO:0001706 endoderm formation;GO:0007492 endoderm development		Predicted intracellular proteins; Disease related genes; Predicted secreted proteins	Endoplasmic reticulum (Approved); Additional: Vesicles		(M3005)NABA COLLAGENS; (M198)PID SYNDECAN 1 PATHWAY; (M18)PID INTEGRIN1 PATHWAY	(M5930)HALLMARK EPITHELIAL MESENCHYMAL TRANSITION	0	0	0	0	0	0	0	0	0	0	0	0	0	0	0	0	0	0	0	0
COPB2	9276	symbol	H. sapiens	9276	H. sapiens	COPB2	COPI coat complex subunit beta 2	GO:0006891 intra-Golgi vesicle-mediated transport;GO:1901998 toxin transport;GO:0006890 retrograde vesicle-mediated transport, Golgi to endoplasmic reticulum		Predicted intracellular proteins	Cytosol (Approved)			(M5910)HALLMARK PROTEIN SECRETION; (M5937)HALLMARK GLYCOLYSIS	0	0	0	0	0	0	0	0	0	0	0	0	0	0	0	0	0	0	0	0
COPS3	8533	symbol	H. sapiens	8533	H. sapiens	COPS3	COP9 signalosome subunit 3	GO:0000338 protein deneddylation;GO:0070646 protein modification by small protein removal;GO:0009416 response to light stimulus		Predicted intracellular proteins	Nucleoplasm (Supported); Additional: Cytosol				0	0	1	0	0	0	0	0	0	0	0	0	0	0	0	0	0	0	0	0
COQ3	51805	symbol	H. sapiens	51805	H. sapiens	COQ3	coenzyme Q3, methyltransferase	GO:0010795 regulation of ubiquinone biosynthetic process;GO:0010566 regulation of ketone biosynthetic process;GO:0006744 ubiquinone biosynthetic process		Predicted intracellular proteins; Enzymes; ENZYME proteins:Transferases	Nucleoplasm (Approved); Additional: Mitochondria			(M5905)HALLMARK ADIPOGENESIS	0	0	0	0	0	0	0	0	0	0	0	0	0	0	0	0	0	0	0	0
CPS1	1373	symbol	H. sapiens	1373	H. sapiens	CPS1	carbamoyl-phosphate synthase 1	GO:0070408 carbamoyl phosphate metabolic process;GO:0070409 carbamoyl phosphate biosynthetic process;GO:0071400 cellular response to oleic acid		Disease related genes; ENZYME proteins:Ligase; Predicted intracellular proteins; FDA approved drug targets:Small molecule drugs; Enzymes	Nucleoli;Nucleoli rim (Supported)	Carglumic acid			0	0	0	0	0	0	0	0	0	0	0	0	0	0	0	0	0	0	0	0
CPSF3	51692	symbol	H. sapiens	51692	H. sapiens	CPSF3	cleavage and polyadenylation specific factor 3	GO:0006398 mRNA 3'-end processing by stem-loop binding and cleavage;GO:0008334 histone mRNA metabolic process;GO:0006379 mRNA cleavage		Predicted intracellular proteins					0	0	0	0	1	0	0	0	0	0	0	0	0	0	0	0	0	0	0	0
CPSF7	79869	symbol	H. sapiens	79869	H. sapiens	CPSF7	cleavage and polyadenylation specific factor 7	GO:1990120 messenger ribonucleoprotein complex assembly;GO:0110104 mRNA alternative polyadenylation;GO:0098789 pre-mRNA cleavage required for polyadenylation		Predicted intracellular proteins	Nucleoplasm (Supported); Additional: Cytosol				1	0	0	0	1	0	0	0	0	0	0	0	0	0	0	0	0	0	0	0
CPXM2	119587	symbol	H. sapiens	119587	H. sapiens	CPXM2	carboxypeptidase X, M14 family member 2	GO:0016485 protein processing;GO:0051604 protein maturation;GO:0006518 peptide metabolic process		Predicted secreted proteins; Predicted intracellular proteins; Peptidases:Metallopeptidases; Enzymes					0	0	0	0	0	0	0	0	0	0	0	0	0	0	0	0	0	0	0	0
CRYZ	1429	symbol	H. sapiens	1429	H. sapiens	CRYZ	crystallin zeta	GO:0042178 xenobiotic catabolic process;GO:0051289 protein homotetramerization;GO:0051262 protein tetramerization		ENZYME proteins:Oxidoreductases; Predicted intracellular proteins; Enzymes	Cytosol (Supported)	Dicoumarol; Nicotinamide adenine dinucleotide phosphate; Medical Cannabis; Nabiximols		(M5935)HALLMARK FATTY ACID METABOLISM	0	0	0	0	0	0	0	0	0	0	0	0	0	0	0	0	0	0	0	0
CSE1L	1434	symbol	H. sapiens	1434	H. sapiens	CSE1L	chromosome segregation 1 like	GO:0006611 protein export from nucleus;GO:0051168 nuclear export;GO:0006606 protein import into nucleus		Predicted intracellular proteins; Transporters:Transporter channels and pores; Cancer-related genes:Candidate cancer biomarkers	Nucleoplasm (Enhanced); Additional: Cytosol		(M261)PID P53 REGULATION PATHWAY; (M145)PID P53 DOWNSTREAM PATHWAY	(M5925)HALLMARK E2F TARGETS	0	0	0	0	0	0	0	0	0	0	0	0	0	0	0	0	0	0	0	0
CTCF	10664	symbol	H. sapiens	10664	H. sapiens	CTCF	CCCTC-binding factor	GO:0040030 regulation of molecular function, epigenetic;GO:0070602 regulation of centromeric sister chromatid cohesion;GO:0010216 maintenance of DNA methylation		Disease related genes; Transcription factors:Zinc-coordinating DNA-binding domains; Predicted intracellular proteins; Cancer-related genes:Mutational cancer driver genes; Cancer-related genes:Mutated cancer genes	Nucleoplasm (Supported)			(M5901)HALLMARK G2M CHECKPOINT; (M5925)HALLMARK E2F TARGETS	0	1	1	0	0	0	0	0	0	0	0	0	1	0	0	1	0	1	0	1
CTR9	9646	symbol	H. sapiens	9646	H. sapiens	CTR9	CTR9 homolog, Paf1/RNA polymerase II complex component	GO:2001162 positive regulation of histone H3-K79 methylation;GO:2001160 regulation of histone H3-K79 methylation;GO:2001168 positive regulation of histone H2B ubiquitination		Predicted intracellular proteins	Nucleoplasm (Enhanced)				0	0	0	0	1	0	0	0	0	0	0	0	1	0	0	0	0	0	0	0
CUL1	8454	symbol	H. sapiens	8454	H. sapiens	CUL1	cullin 1	GO:0031146 SCF-dependent proteasomal ubiquitin-dependent protein catabolic process;GO:0070936 protein K48-linked ubiquitination;GO:0006513 protein monoubiquitination		Cancer-related genes:Mutational cancer driver genes; Predicted intracellular proteins	Nucleoplasm (Supported); Additional: Nucleoli		(M31)PID BETA CATENIN DEG PATHWAY; (M17)PID NOTCH PATHWAY; (M223)PID BETA CATENIN NUC PATHWAY	(M5903)HALLMARK NOTCH SIGNALING; (M5895)HALLMARK WNT BETA CATENIN SIGNALING; (M5901)HALLMARK G2M CHECKPOINT	1	1	0	0	0	0	0	1	0	0	0	1	0	1	0	0	0	0	0	0
CUL2	8453	symbol	H. sapiens	8453	H. sapiens	CUL2	cullin 2	GO:0031146 SCF-dependent proteasomal ubiquitin-dependent protein catabolic process;GO:0000082 G1/S transition of mitotic cell cycle;GO:0044843 cell cycle G1/S phase transition		Predicted intracellular proteins; Cancer-related genes:Candidate cancer biomarkers	Nucleoplasm (Enhanced)		(M180)PID HIF1A PATHWAY		0	1	0	0	0	0	0	0	0	0	0	1	0	0	0	0	0	0	0	0
CUTC	51076	symbol	H. sapiens	51076	H. sapiens	CUTC	cutC copper transporter	GO:0006825 copper ion transport;GO:0055070 copper ion homeostasis;GO:0051262 protein tetramerization		Transporters; Predicted intracellular proteins	Cytosol;Nucleoplasm (Enhanced); Additional: Nucleoli				0	0	0	0	0	0	0	0	0	0	0	0	0	0	0	0	0	0	0	0
CWC22	57703	symbol	H. sapiens	57703	H. sapiens	CWC22	CWC22 spliceosome associated protein homolog	GO:0048024 regulation of mRNA splicing, via spliceosome;GO:0050684 regulation of mRNA processing;GO:0043484 regulation of RNA splicing		Predicted intracellular proteins	Nuclear speckles (Supported); Additional: Cytosol				0	0	0	0	1	0	0	0	0	0	0	0	0	0	0	0	0	0	0	0
CWC25	54883	symbol	H. sapiens	54883	H. sapiens	CWC25	CWC25 spliceosome associated protein homolog	GO:0000377 RNA splicing, via transesterification reactions with bulged adenosine as nucleophile;GO:0000398 mRNA splicing, via spliceosome;GO:0000375 RNA splicing, via transesterification reactions		Predicted intracellular proteins	Nuclear speckles (Enhanced)				0	0	0	0	1	0	0	0	0	0	0	0	0	0	0	0	0	0	0	0
CWC27	10283	symbol	H. sapiens	10283	H. sapiens	CWC27	CWC27 spliceosome associated cyclophilin	GO:0000413 protein peptidyl-prolyl isomerization;GO:0018208 peptidyl-proline modification;GO:0006457 protein folding		Disease related genes; Predicted intracellular proteins; Potential drug targets; ENZYME proteins:Isomerase; Enzymes	Nucleoplasm (Enhanced)				0	0	0	0	1	0	0	0	0	0	0	0	0	0	0	0	0	0	0	0
CYB5D1	124637	symbol	H. sapiens	124637	H. sapiens	CYB5D1	cytochrome b5 domain containing 1			Predicted intracellular proteins	Golgi apparatus;Nucleoli (Approved)				0	0	0	0	0	0	0	0	0	0	0	0	0	0	0	0	0	0	0	0
CYB5R2	51700	symbol	H. sapiens	51700	H. sapiens	CYB5R2	cytochrome b5 reductase 2	GO:0015701 bicarbonate transport;GO:0016126 sterol biosynthetic process;GO:0016125 sterol metabolic process		ENZYME proteins:Oxidoreductases; Predicted intracellular proteins; Enzymes	Golgi apparatus (Approved); Additional: Nucleoplasm				0	0	0	0	0	0	0	0	0	0	0	0	0	0	0	0	0	0	0	0
CYP2R1	120227	symbol	H. sapiens	120227	H. sapiens	CYP2R1	cytochrome P450 family 2 subfamily R member 1	GO:0010164 response to cesium ion;GO:0036378 calcitriol biosynthetic process from calciol;GO:0044107 cellular alcohol metabolic process		Disease related genes; Predicted intracellular proteins; ENZYME proteins:Oxidoreductases; Potential drug targets; Enzymes					0	0	0	0	0	0	0	0	0	0	0	0	0	0	0	0	0	0	0	0
DARS	1615	gene_synonym	H. sapiens	1615	H. sapiens	DARS1	aspartyl-tRNA synthetase 1	GO:0006422 aspartyl-tRNA aminoacylation;GO:0006418 tRNA aminoacylation for protein translation;GO:0043039 tRNA aminoacylation		Disease related genes; ENZYME proteins:Ligase; Predicted intracellular proteins; Potential drug targets; Enzymes	Cytosol (Enhanced)	Aspartic acid		(M5950)HALLMARK ALLOGRAFT REJECTION	0	0	0	0	0	0	0	0	0	0	0	0	0	0	0	0	0	0	0	0
DARS2	55157	symbol	H. sapiens	55157	H. sapiens	DARS2	aspartyl-tRNA synthetase 2, mitochondrial	GO:0070145 mitochondrial asparaginyl-tRNA aminoacylation;GO:0006422 aspartyl-tRNA aminoacylation;GO:0006421 asparaginyl-tRNA aminoacylation		Disease related genes; ENZYME proteins:Ligase; Predicted intracellular proteins; Potential drug targets; Enzymes	Mitochondria (Supported); Additional: Nucleoplasm	Aspartic acid			0	0	0	0	0	0	0	0	0	0	0	0	0	0	0	0	0	0	0	0
DAZAP2	9802	symbol	H. sapiens	9802	H. sapiens	DAZAP2	DAZ associated protein 2	GO:0071902 positive regulation of protein serine/threonine kinase activity;GO:0071900 regulation of protein serine/threonine kinase activity;GO:0045860 positive regulation of protein kinase activity		Predicted intracellular proteins	Nuclear speckles (Supported)				0	0	0	0	0	0	0	0	0	0	0	0	0	0	0	0	0	0	0	0
DBF4	10926	symbol	H. sapiens	10926	H. sapiens	DBF4	DBF4 zinc finger	GO:0010571 positive regulation of nuclear cell cycle DNA replication;GO:2000105 positive regulation of DNA-dependent DNA replication;GO:0033262 regulation of nuclear cell cycle DNA replication		Predicted intracellular proteins	Nuclear bodies;Nucleoplasm (Supported)			(M5951)HALLMARK SPERMATOGENESIS; (M5901)HALLMARK G2M CHECKPOINT	1	1	1	0	0	1	0	1	1	0	0	1	0	0	0	0	0	0	0	0
DBF4B	80174	symbol	H. sapiens	80174	H. sapiens	DBF4B	DBF4 zinc finger B	GO:0010571 positive regulation of nuclear cell cycle DNA replication;GO:2000105 positive regulation of DNA-dependent DNA replication;GO:0033262 regulation of nuclear cell cycle DNA replication		Predicted intracellular proteins	Nucleoplasm (Supported); Additional: Vesicles				0	1	0	0	0	1	0	0	1	0	0	0	0	0	0	0	1	0	0	0
DBI	1622	symbol	H. sapiens	1622	H. sapiens	DBI	diazepam binding inhibitor, acyl-CoA binding protein	GO:1905918 regulation of CoA-transferase activity;GO:1905920 positive regulation of CoA-transferase activity;GO:1903060 negative regulation of protein lipidation		Predicted intracellular proteins; Cancer-related genes:Candidate cancer biomarkers		Coenzyme A; Hexadecanal		(M5908)HALLMARK ANDROGEN RESPONSE	0	0	0	0	0	0	0	0	0	0	0	0	0	0	0	0	0	0	0	0
DCAF12	25853	symbol	H. sapiens	25853	H. sapiens	DCAF12	DDB1 and CUL4 associated factor 12	GO:0140627 ubiquitin-dependent protein catabolic process via the C-end degron rule pathway;GO:0010506 regulation of autophagy;GO:0043161 proteasome-mediated ubiquitin-dependent protein catabolic process		Predicted intracellular proteins					0	0	0	0	0	0	0	0	0	0	0	0	0	0	0	0	0	0	0	0
DCAF7	10238	symbol	H. sapiens	10238	H. sapiens	DCAF7	DDB1 and CUL4 associated factor 7	GO:0016567 protein ubiquitination;GO:0032446 protein modification by small protein conjugation;GO:0070647 protein modification by small protein conjugation or removal		Predicted intracellular proteins	Nucleoplasm (Supported); Additional: Cytosol				0	0	0	0	0	0	0	0	0	0	0	0	0	0	0	0	0	0	0	0
DCLRE1A	9937	symbol	H. sapiens	9937	H. sapiens	DCLRE1A	DNA cross-link repair 1A	GO:0031848 protection from non-homologous end joining at telomere;GO:0043247 telomere maintenance in response to DNA damage;GO:0016233 telomere capping		Predicted intracellular proteins	Nucleoplasm (Supported); Additional: Nucleoli fibrillar center				0	1	1	0	0	0	0	0	0	0	0	0	0	0	0	0	0	0	0	0
DCLRE1B	64858	symbol	H. sapiens	64858	H. sapiens	DCLRE1B	DNA cross-link repair 1B	GO:0031627 telomeric loop formation;GO:0031860 telomeric 3' overhang formation;GO:0031848 protection from non-homologous end joining at telomere		Predicted intracellular proteins; Disease related genes	Nuclear bodies;Nucleoplasm (Supported)			(M5925)HALLMARK E2F TARGETS	0	0	1	0	0	0	0	0	0	0	0	0	0	0	0	0	0	0	0	0
DDIAS	220042	symbol	H. sapiens	220042	H. sapiens	DDIAS	DNA damage induced apoptosis suppressor	GO:0097752 regulation of DNA stability;GO:1902230 negative regulation of intrinsic apoptotic signaling pathway in response to DNA damage;GO:1902229 regulation of intrinsic apoptotic signaling pathway in response to DNA damage		Predicted intracellular proteins	Cytosol;Plasma membrane (Approved)				0	0	1	0	0	0	0	0	0	0	0	0	0	0	0	0	0	0	0	0
DDX18	8886	symbol	H. sapiens	8886	H. sapiens	DDX18	DEAD-box helicase 18	GO:0000463 maturation of LSU-rRNA from tricistronic rRNA transcript (SSU-rRNA, 5.8S rRNA, LSU-rRNA);GO:0000470 maturation of LSU-rRNA;GO:0071392 cellular response to estradiol stimulus		Predicted intracellular proteins; Enzymes; ENZYME proteins:Hydrolases	Mitotic chromosome;Nucleoli;Nucleoli rim (Enhanced)		(M66)PID MYC ACTIV PATHWAY	(M5928)HALLMARK MYC TARGETS V2; (M5926)HALLMARK MYC TARGETS V1	0	0	0	0	0	0	0	0	0	0	0	0	0	0	0	0	0	0	0	0
DDX26B	203522	gene_synonym	H. sapiens	203522	H. sapiens	INTS6L	integrator complex subunit 6 like	GO:0034472 snRNA 3'-end processing;GO:0016180 snRNA processing;GO:0016073 snRNA metabolic process		Predicted intracellular proteins	Centrosome (Approved); Additional: Mitochondria;Nuclear bodies		(M3008)NABA ECM GLYCOPROTEINS; (M5884)NABA CORE MATRISOME; (M5889)NABA MATRISOME		0	0	0	0	0	0	0	0	0	0	0	0	0	0	0	0	0	0	0	0
DDX42	11325	symbol	H. sapiens	11325	H. sapiens	DDX42	DEAD-box helicase 42	GO:0042981 regulation of apoptotic process;GO:0043067 regulation of programmed cell death;GO:0010941 regulation of cell death		Predicted intracellular proteins; Enzymes; ENZYME proteins:Hydrolases	Nuclear speckles (Enhanced)				0	0	0	0	1	0	0	0	0	0	0	0	0	0	0	0	0	0	0	0
DDX46	9879	symbol	H. sapiens	9879	H. sapiens	DDX46	DEAD-box helicase 46	GO:0000377 RNA splicing, via transesterification reactions with bulged adenosine as nucleophile;GO:0000398 mRNA splicing, via spliceosome;GO:0000375 RNA splicing, via transesterification reactions		Predicted intracellular proteins; Enzymes; ENZYME proteins:Hydrolases	Nuclear speckles (Supported); Additional: Nucleoli fibrillar center				0	0	0	0	1	0	0	0	0	0	0	0	0	0	0	0	0	0	0	0
DDX5	1655	symbol	H. sapiens	1655	H. sapiens	DDX5	DEAD-box helicase 5	GO:1903800 positive regulation of production of miRNAs involved in gene silencing by miRNA;GO:0043517 positive regulation of DNA damage response, signal transduction by p53 class mediator;GO:0009299 mRNA transcription		Predicted intracellular proteins; Cancer-related genes:Mutational cancer driver genes; ENZYME proteins:Hydrolases; Cancer-related genes:Mutated cancer genes; Enzymes	Nucleoli;Nucleoplasm (Supported)	Artenimol	(M145)PID P53 DOWNSTREAM PATHWAY		0	0	1	0	1	0	0	0	0	0	0	0	0	0	0	0	1	0	0	0
DEDD	9191	symbol	H. sapiens	9191	H. sapiens	DEDD	death effector domain containing	GO:1901837 negative regulation of transcription of nucleolar large rRNA by RNA polymerase I;GO:0016479 negative regulation of transcription by RNA polymerase I;GO:1901836 regulation of transcription of nucleolar large rRNA by RNA polymerase I		Predicted intracellular proteins	Nucleoplasm (Approved)		(M19)PID P73PATHWAY		0	0	0	0	0	0	0	0	0	0	0	0	0	0	0	0	0	0	0	0
DEPDC1	55635	symbol	H. sapiens	55635	H. sapiens	DEPDC1	DEP domain containing 1	GO:0045892 negative regulation of transcription, DNA-templated;GO:1903507 negative regulation of nucleic acid-templated transcription;GO:1902679 negative regulation of RNA biosynthetic process		Predicted intracellular proteins	Nucleoplasm (Supported); Additional: Nucleoli fibrillar center			(M5925)HALLMARK E2F TARGETS; (M5937)HALLMARK GLYCOLYSIS	0	0	0	0	0	0	0	0	0	0	0	0	0	0	0	0	0	0	0	0
DEPDC1B	55789	symbol	H. sapiens	55789	H. sapiens	DEPDC1B	DEP domain containing 1B	GO:0030177 positive regulation of Wnt signaling pathway;GO:0030111 regulation of Wnt signaling pathway;GO:0016055 Wnt signaling pathway		Predicted intracellular proteins	Golgi apparatus (Approved); Additional: Cytosol;Nucleoplasm				1	0	0	0	0	0	0	0	0	0	0	0	0	0	0	0	0	0	0	0
DEPDC7	91614	symbol	H. sapiens	91614	H. sapiens	DEPDC7	DEP domain containing 7	GO:0035556 intracellular signal transduction;GO:0007165 signal transduction;GO:0023052 signaling		Predicted intracellular proteins	Nucleoli (Approved); Additional: Cytosol;Nucleoplasm				0	0	0	0	0	0	0	0	0	0	0	0	0	0	0	0	0	0	0	0
DET1	55070	symbol	H. sapiens	55070	H. sapiens	DET1	DET1 partner of COP1 E3 ubiquitin ligase	GO:0032436 positive regulation of proteasomal ubiquitin-dependent protein catabolic process;GO:2000060 positive regulation of ubiquitin-dependent protein catabolic process;GO:1901800 positive regulation of proteasomal protein catabolic process		Predicted intracellular proteins	Microtubules;Nucleoplasm (Approved); Additional: Cytokinetic bridge;Cytosol				0	0	0	0	0	0	0	0	0	0	0	1	0	0	0	0	0	0	0	0
DHRS4-AS1	55449	symbol	H. sapiens	55449	H. sapiens	DHRS4-AS1	DHRS4 antisense RNA 1								0	0	0	0	0	0	0	0	0	0	0	0	0	0	0	0	0	0	0	0
DHX15	1665	symbol	H. sapiens	1665	H. sapiens	DHX15	DEAH-box helicase 15	GO:0043279 response to alkaloid;GO:0009636 response to toxic substance;GO:0008380 RNA splicing		Predicted intracellular proteins; Enzymes; ENZYME proteins:Hydrolases	Nuclear speckles (Enhanced)			(M5926)HALLMARK MYC TARGETS V1	0	0	0	0	1	0	0	0	0	0	0	0	0	0	0	0	0	0	0	0
DHX9	1660	symbol	H. sapiens	1660	H. sapiens	DHX9	DExH-box helicase 9	GO:0039695 DNA-templated viral transcription;GO:1904971 regulation of viral translation;GO:1904973 positive regulation of viral translation		Cancer-related genes:Mutational cancer driver genes; Predicted intracellular proteins; Enzymes; ENZYME proteins:Hydrolases	Nucleoplasm (Supported); Additional: Nucleoli				0	0	1	0	1	1	0	0	0	0	0	0	0	0	0	0	0	0	0	0
DIAPH3	81624	symbol	H. sapiens	81624	H. sapiens	DIAPH3	diaphanous related formin 3	GO:0030041 actin filament polymerization;GO:0008154 actin polymerization or depolymerization;GO:0051258 protein polymerization		Predicted intracellular proteins; Disease related genes; Cancer-related genes:Candidate cancer biomarkers	Microtubules;Plasma membrane (Supported)		(M81)PID CDC42 PATHWAY; (M164)PID ERBB1 DOWNSTREAM PATHWAY	(M5925)HALLMARK E2F TARGETS	1	0	0	0	0	0	0	0	0	0	0	0	0	0	0	0	0	0	0	0
DLGAP5	9787	symbol	H. sapiens	9787	H. sapiens	DLGAP5	DLG associated protein 5	GO:0007079 mitotic chromosome movement towards spindle pole;GO:0051305 chromosome movement towards spindle pole;GO:0045842 positive regulation of mitotic metaphase/anaphase transition		Predicted intracellular proteins	Centriolar satellite;Cytosol (Supported)		(M242)PID AURORA A PATHWAY	(M5893)HALLMARK MITOTIC SPINDLE; (M5925)HALLMARK E2F TARGETS	0	1	0	1	0	0	0	0	1	1	0	1	0	0	0	0	0	0	0	0
DLST	1743	symbol	H. sapiens	1743	H. sapiens	DLST	dihydrolipoamide S-succinyltransferase	GO:0033512 L-lysine catabolic process to acetyl-CoA via saccharopine;GO:0018335 protein succinylation;GO:0106077 histone succinylation		Predicted intracellular proteins; Enzymes; Citric acid cycle related proteins; ENZYME proteins:Transferases	Mitochondria;Nucleoplasm (Approved)			(M5935)HALLMARK FATTY ACID METABOLISM; (M5936)HALLMARK OXIDATIVE PHOSPHORYLATION	0	0	0	0	0	0	0	0	0	0	0	0	1	0	0	0	0	0	0	0
DMC1	11144	symbol	H. sapiens	11144	H. sapiens	DMC1	DNA meiotic recombinase 1	GO:0000730 DNA recombinase assembly;GO:0090735 DNA repair complex assembly;GO:0042148 strand invasion		Predicted intracellular proteins	Nucleoplasm (Approved)	Imidazole		(M5951)HALLMARK SPERMATOGENESIS	1	1	1	0	0	0	1	0	0	0	0	0	0	0	0	0	0	0	0	0
DMKN	93099	symbol	H. sapiens	93099	H. sapiens	DMKN	dermokine	GO:1903575 cornified envelope assembly;GO:0071709 membrane assembly;GO:0044091 membrane biogenesis		Predicted intracellular proteins; Predicted secreted proteins	Cytosol;Nucleoplasm (Approved)				0	0	0	0	0	0	0	0	0	0	0	0	0	0	0	0	0	0	0	0
DMTF1	9988	symbol	H. sapiens	9988	H. sapiens	DMTF1	cyclin D binding myb like transcription factor 1	GO:0045944 positive regulation of transcription by RNA polymerase II;GO:0045893 positive regulation of transcription, DNA-templated;GO:1903508 positive regulation of nucleic acid-templated transcription		Predicted intracellular proteins; Transcription factors:Helix-turn-helix domains	Nucleoplasm (Supported)		(M65)PID FRA PATHWAY; (M167)PID AP1 PATHWAY		0	0	0	0	0	0	0	0	0	0	0	0	0	0	0	0	0	0	0	0
DNAJB5	25822	symbol	H. sapiens	25822	H. sapiens	DNAJB5	DnaJ heat shock protein family (Hsp40) member B5	GO:0051085 chaperone cofactor-dependent protein refolding;GO:0051084 'de novo' posttranslational protein folding;GO:0006458 'de novo' protein folding		Predicted intracellular proteins	Nucleoplasm (Approved); Additional: Cytosol				0	0	0	0	0	0	0	0	0	0	0	0	0	0	0	0	0	0	0	0
DNAJC27	51277	symbol	H. sapiens	51277	H. sapiens	DNAJC27	DnaJ heat shock protein family (Hsp40) member C27	GO:0071701 regulation of MAPK export from nucleus;GO:0045204 MAPK export from nucleus;GO:0046825 regulation of protein export from nucleus		Predicted intracellular proteins	Cytosol (Approved)				0	0	0	0	0	0	0	0	0	0	0	0	0	0	0	0	0	0	0	0
DNAJC8	22826	symbol	H. sapiens	22826	H. sapiens	DNAJC8	DnaJ heat shock protein family (Hsp40) member C8			Predicted intracellular proteins	Nucleoplasm (Enhanced)				0	0	0	0	1	0	0	0	0	0	0	0	0	0	0	0	0	0	0	0
DNM3OS	100628315	symbol	H. sapiens	100628315	H. sapiens	DNM3OS	DNM3 opposite strand/antisense RNA	GO:0035195 gene silencing by miRNA;GO:0035194 post-transcriptional gene silencing by RNA;GO:0016441 posttranscriptional gene silencing							0	0	0	0	0	0	0	0	0	0	0	0	0	0	0	0	0	0	0	0
DNTTIP2	30836	symbol	H. sapiens	30836	H. sapiens	DNTTIP2	deoxynucleotidyltransferase terminal interacting protein 2	GO:0006396 RNA processing;GO:0016070 RNA metabolic process;GO:0090304 nucleic acid metabolic process		Predicted intracellular proteins	Mitotic chromosome;Nucleoli;Nucleoli rim (Enhanced)			(M5939)HALLMARK P53 PATHWAY	0	0	0	0	0	0	0	0	0	0	0	0	0	0	0	0	0	0	0	0
DONSON	29980	symbol	H. sapiens	29980	H. sapiens	DONSON	DNA replication fork stabilization factor DONSON	GO:0048478 replication fork protection;GO:2000104 negative regulation of DNA-dependent DNA replication;GO:0008156 negative regulation of DNA replication		Predicted intracellular proteins; Disease related genes	Cell Junctions;Nucleoplasm (Approved); Additional: Cytosol			(M5925)HALLMARK E2F TARGETS	0	1	1	0	0	1	0	0	0	0	0	0	0	0	0	0	1	0	0	0
DPAGT1	1798	symbol	H. sapiens	1798	H. sapiens	DPAGT1	dolichyl-phosphate N-acetylglucosaminephosphotransferase 1	GO:0019348 dolichol metabolic process;GO:0006489 dolichyl diphosphate biosynthetic process;GO:0046465 dolichyl diphosphate metabolic process		Potential drug targets; Disease related genes; Enzymes; ENZYME proteins:Transferases					0	0	0	0	0	0	0	0	0	0	0	0	0	0	0	0	0	0	0	0
DRAM2	128338	symbol	H. sapiens	128338	H. sapiens	DRAM2	DNA damage regulated autophagy modulator 2	GO:0045494 photoreceptor cell maintenance;GO:0001895 retina homeostasis;GO:0007601 visual perception			Golgi apparatus;Vesicles (Enhanced)			(M5905)HALLMARK ADIPOGENESIS	0	0	0	0	0	0	0	0	0	0	0	0	0	0	0	0	0	0	0	0
DSN1	79980	symbol	H. sapiens	79980	H. sapiens	DSN1	DSN1 component of MIS12 kinetochore complex	GO:0000070 mitotic sister chromatid segregation;GO:0000819 sister chromatid segregation;GO:0098813 nuclear chromosome segregation		Predicted intracellular proteins	Nucleoplasm (Supported); Additional: Cytosol;Kinetochore;Nuclear bodies;Nucleoli fibrillar center				1	1	0	0	0	0	0	0	0	0	0	0	0	0	0	0	0	0	0	0
DTWD1	56986	symbol	H. sapiens	56986	H. sapiens	DTWD1	DTW domain containing 1	GO:0006400 tRNA modification;GO:0008033 tRNA processing;GO:0009451 RNA modification		Predicted intracellular proteins	Nucleoli rim (Approved); Additional: Mitotic chromosome;Nucleoplasm;Vesicles				0	0	0	0	0	0	0	0	0	0	0	0	0	0	0	0	0	0	0	0
DUSP12	11266	symbol	H. sapiens	11266	H. sapiens	DUSP12	dual specificity phosphatase 12	GO:0033133 positive regulation of glucokinase activity;GO:1903301 positive regulation of hexokinase activity;GO:0033131 regulation of glucokinase activity		Predicted intracellular proteins; Enzymes; ENZYME proteins:Hydrolases	Nucleoplasm (Supported)				0	0	0	0	0	0	0	0	0	0	0	0	0	0	0	0	0	0	0	0
DUSP5P1	574029	symbol	H. sapiens	574029	H. sapiens	DUSP5P1	dual specificity phosphatase 5 pseudogene 1								0	0	0	0	0	0	0	0	0	0	0	0	0	0	0	0	0	0	0	0
DYM	54808	symbol	H. sapiens	54808	H. sapiens	DYM	dymeclin	GO:0007030 Golgi organization;GO:0060348 bone development;GO:0001501 skeletal system development		Predicted intracellular proteins; Disease related genes	Golgi apparatus (Supported)				0	0	0	0	0	0	0	0	0	0	0	0	0	0	0	0	0	0	0	0
DYNLT1	6993	symbol	H. sapiens	6993	H. sapiens	DYNLT1	dynein light chain Tctex-type 1	GO:0075519 microtubule-dependent intracellular transport of viral material;GO:0075521 microtubule-dependent intracellular transport of viral material towards nucleus;GO:0075606 transport of viral material towards nucleus		Predicted intracellular proteins	Nucleoplasm (Approved)		(M163)PID LIS1 PATHWAY; (M187)PID TRKR PATHWAY		0	1	0	1	0	0	0	0	0	1	0	0	0	0	0	0	0	0	0	0
DYRK4	8798	symbol	H. sapiens	8798	H. sapiens	DYRK4	dual specificity tyrosine phosphorylation regulated kinase 4	GO:0018107 peptidyl-threonine phosphorylation;GO:0018210 peptidyl-threonine modification;GO:0018105 peptidyl-serine phosphorylation	CMGC Ser/Thr protein kinase family	Kinases:CMGC Ser/Thr protein kinases; Predicted intracellular proteins; Enzymes; ENZYME proteins:Transferases	Vesicles (Enhanced)				0	0	0	0	0	0	0	0	0	0	0	0	0	0	0	0	0	0	0	0
DZANK1	55184	symbol	H. sapiens	55184	H. sapiens	DZANK1	double zinc ribbon and ankyrin repeat domains 1	GO:0042462 eye photoreceptor cell development;GO:0001754 eye photoreceptor cell differentiation;GO:0042461 photoreceptor cell development		Predicted intracellular proteins	Nucleoli fibrillar center (Approved)				0	0	0	0	0	0	0	0	0	0	0	0	0	0	0	0	0	0	0	0
E2F8	79733	symbol	H. sapiens	79733	H. sapiens	E2F8	E2F transcription factor 8	GO:0033301 cell cycle comprising mitosis without cytokinesis;GO:0032877 positive regulation of DNA endoreduplication;GO:0032875 regulation of DNA endoreduplication		Predicted intracellular proteins; Transcription factors:Helix-turn-helix domains	Nucleoli (Supported); Additional: Cytosol;Nucleoplasm			(M5925)HALLMARK E2F TARGETS	0	1	1	0	0	1	0	0	1	0	0	0	0	0	0	0	0	0	0	0
ECD	11319	symbol	H. sapiens	11319	H. sapiens	ECD	ecdysoneless cell cycle regulator	GO:2000045 regulation of G1/S transition of mitotic cell cycle;GO:1902806 regulation of cell cycle G1/S phase transition;GO:0000082 G1/S transition of mitotic cell cycle		Predicted intracellular proteins	Cytosol;Nucleoplasm (Supported)			(M5937)HALLMARK GLYCOLYSIS	0	1	0	0	1	0	0	0	0	0	0	0	0	0	0	0	0	0	0	0
ECT2	1894	symbol	H. sapiens	1894	H. sapiens	ECT2	epithelial cell transforming 2	GO:2000431 regulation of cytokinesis, actomyosin contractile ring assembly;GO:0032954 regulation of cytokinetic process;GO:0000912 assembly of actomyosin apparatus involved in cytokinesis		Predicted intracellular proteins	Nucleoplasm (Enhanced); Additional: Cytosol		(M68)PID RHOA REG PATHWAY; (M129)PID PLK1 PATHWAY	(M5893)HALLMARK MITOTIC SPINDLE	1	1	0	0	0	0	0	0	1	1	1	0	0	0	0	0	0	0	0	0
EDC3	80153	symbol	H. sapiens	80153	H. sapiens	EDC3	enhancer of mRNA decapping 3	GO:0031087 deadenylation-independent decapping of nuclear-transcribed mRNA;GO:0031086 nuclear-transcribed mRNA catabolic process, deadenylation-independent decay;GO:0110156 methylguanosine-cap decapping		Predicted intracellular proteins; Disease related genes	Cytoplasmic bodies (Supported)				0	0	0	1	1	0	0	0	0	0	0	0	0	0	0	0	0	0	0	0
EFCAB14	9813	symbol	H. sapiens	9813	H. sapiens	EFCAB14	EF-hand calcium binding domain 14				Cytosol (Approved); Additional: Golgi apparatus;Nucleoli				0	0	0	0	0	0	0	0	0	0	0	0	0	0	0	0	0	0	0	0
EFCAB2	84288	symbol	H. sapiens	84288	H. sapiens	EFCAB2	EF-hand calcium binding domain 2			Predicted intracellular proteins	Cytosol;Plasma membrane (Approved)				0	0	0	0	0	0	0	0	0	0	0	0	0	0	0	0	0	0	0	0
EFTUD2	9343	symbol	H. sapiens	9343	H. sapiens	EFTUD2	elongation factor Tu GTP binding domain containing 2	GO:0042220 response to cocaine;GO:0043279 response to alkaloid;GO:0071466 cellular response to xenobiotic stimulus		Predicted intracellular proteins; Disease related genes	Nucleoplasm (Approved); Additional: Cytosol;Vesicles				0	0	0	0	1	0	0	0	0	0	0	0	0	0	0	0	0	0	0	0
EGF	1950	symbol	H. sapiens	1950	H. sapiens	EGF	epidermal growth factor	GO:0038029 epidermal growth factor receptor signaling pathway via MAPK cascade;GO:1900127 positive regulation of hyaluronan biosynthetic process;GO:1905276 regulation of epithelial tube formation		FDA approved drug targets:Small molecule drugs; Disease related genes; Cancer-related genes:Candidate cancer biomarkers; RAS pathway related proteins		Sucralfate; Alpha-Aminobutyric Acid; Cholecystokinin; Tesevatinib	(M201)PID ERBB NETWORK PATHWAY; (M86)PID ARF6 PATHWAY; (M127)PID ERBB1 RECEPTOR PROXIMAL PATHWAY	(M5901)HALLMARK G2M CHECKPOINT; (M5956)HALLMARK KRAS SIGNALING DN	0	1	0	0	0	1	0	0	1	0	0	1	0	0	0	0	0	0	0	0
EIF2A	83939	symbol	H. sapiens	83939	H. sapiens	EIF2A	eukaryotic translation initiation factor 2A	GO:0032933 SREBP signaling pathway;GO:0071501 cellular response to sterol depletion;GO:0006991 response to sterol depletion		Predicted intracellular proteins	Cytosol;Mitochondria (Approved)		(M286)PID TGFBR PATHWAY		0	0	0	1	0	0	0	0	0	0	0	0	0	0	0	0	0	0	0	0
EIF2B2	8892	symbol	H. sapiens	8892	H. sapiens	EIF2B2	eukaryotic translation initiation factor 2B subunit beta	GO:0014003 oligodendrocyte development;GO:0001541 ovarian follicle development;GO:0006446 regulation of translational initiation		Predicted intracellular proteins; Disease related genes	Focal adhesion sites;Plasma membrane (Approved); Additional: Nucleoplasm				0	0	0	0	0	0	0	0	0	0	0	0	0	0	0	0	0	0	0	0
EIF4G2	1982	symbol	H. sapiens	1982	H. sapiens	EIF4G2	eukaryotic translation initiation factor 4 gamma 2	GO:0060999 positive regulation of dendritic spine development;GO:0045773 positive regulation of axon extension;GO:0060998 regulation of dendritic spine development		Predicted intracellular proteins	Cytosol (Enhanced)			(M5926)HALLMARK MYC TARGETS V1	0	0	0	0	0	0	0	0	0	0	0	0	0	0	0	0	0	0	0	0
EIF4G3	8672	symbol	H. sapiens	8672	H. sapiens	EIF4G3	eukaryotic translation initiation factor 4 gamma 3	GO:0006446 regulation of translational initiation;GO:0010507 negative regulation of autophagy;GO:0006413 translational initiation		Predicted intracellular proteins	Cytosol (Approved)			(M5950)HALLMARK ALLOGRAFT REJECTION	0	0	0	0	0	0	0	0	0	0	0	0	0	0	0	0	0	0	0	0
EIF5	1983	symbol	H. sapiens	1983	H. sapiens	EIF5	eukaryotic translation initiation factor 5	GO:0001731 formation of translation preinitiation complex;GO:0001732 formation of cytoplasmic translation initiation complex;GO:0002183 cytoplasmic translational initiation		Predicted intracellular proteins	Cytosol (Enhanced); Additional: Plasma membrane			(M5941)HALLMARK UV RESPONSE UP	0	0	0	0	0	0	0	0	0	0	0	0	0	0	0	0	0	0	0	0
ELF1	1997	symbol	H. sapiens	1997	H. sapiens	ELF1	E74 like ETS transcription factor 1	GO:0045944 positive regulation of transcription by RNA polymerase II;GO:0045893 positive regulation of transcription, DNA-templated;GO:1903508 positive regulation of nucleic acid-templated transcription		Predicted intracellular proteins; Transcription factors:Helix-turn-helix domains	Nucleoplasm (Supported)		(M234)PID IL2 STAT5 PATHWAY; (M92)PID ANGIOPOIETIN RECEPTOR PATHWAY; (M279)PID RB 1PATHWAY	(M5911)HALLMARK INTERFERON ALPHA RESPONSE; (M5906)HALLMARK ESTROGEN RESPONSE EARLY	0	0	0	0	0	0	0	0	0	0	0	0	0	0	0	0	0	0	0	0
ELK3	2004	symbol	H. sapiens	2004	H. sapiens	ELK3	ETS transcription factor ELK3	GO:0042060 wound healing;GO:0009611 response to wounding;GO:0001525 angiogenesis		Predicted intracellular proteins; Transcription factors:Helix-turn-helix domains; Cancer-related genes:Candidate cancer biomarkers	Nucleoplasm (Supported); Additional: Mitochondria				0	0	0	0	0	0	0	0	0	0	0	0	0	0	0	0	0	0	0	0
ELL3	80237	symbol	H. sapiens	80237	H. sapiens	ELL3	elongation factor for RNA polymerase II 3	GO:1902166 negative regulation of intrinsic apoptotic signaling pathway in response to DNA damage by p53 class mediator;GO:1902165 regulation of intrinsic apoptotic signaling pathway in response to DNA damage by p53 class mediator;GO:0042795 snRNA transcription by RNA polymerase II		Predicted intracellular proteins	Nucleoli;Nucleoplasm (Supported); Additional: Mitotic chromosome				0	0	1	0	0	0	0	0	0	0	0	0	0	0	0	0	0	0	0	0
ELP4	26610	symbol	H. sapiens	26610	H. sapiens	ELP4	elongator acetyltransferase complex subunit 4	GO:0002098 tRNA wobble uridine modification;GO:0002097 tRNA wobble base modification;GO:0006368 transcription elongation from RNA polymerase II promoter		Predicted intracellular proteins; Disease related genes	Nucleoplasm (Supported)			(M5957)HALLMARK PANCREAS BETA CELLS	0	0	0	0	0	0	0	0	0	0	0	0	1	0	0	0	0	0	0	0
EME1	146956	symbol	H. sapiens	146956	H. sapiens	EME1	essential meiotic structure-specific endonuclease 1	GO:0072429 response to intra-S DNA damage checkpoint signaling;GO:0072396 response to cell cycle checkpoint signaling;GO:0072402 response to DNA integrity checkpoint signaling		Predicted intracellular proteins	Cytosol;Nuclear bodies (Approved)				0	1	1	0	0	1	1	0	0	0	0	0	0	0	0	0	1	0	0	0
EMP1	2012	symbol	H. sapiens	2012	H. sapiens	EMP1	epithelial membrane protein 1	GO:0032060 bleb assembly;GO:0008544 epidermis development;GO:0120031 plasma membrane bounded cell projection assembly		Predicted intracellular proteins	Nucleoplasm (Approved)			(M5902)HALLMARK APOPTOSIS; (M5947)HALLMARK IL2 STAT5 SIGNALING; (M5953)HALLMARK KRAS SIGNALING UP	0	0	0	0	0	0	0	0	0	0	0	0	0	0	0	0	0	0	0	0
ENO1	2023	symbol	H. sapiens	2023	H. sapiens	ENO1	enolase 1	GO:1903297 regulation of hypoxia-induced intrinsic apoptotic signaling pathway;GO:1903298 negative regulation of hypoxia-induced intrinsic apoptotic signaling pathway;GO:0010756 positive regulation of plasminogen activation		Predicted intracellular proteins; ENZYME proteins:Lyases; Enzymes; Cancer-related genes:Candidate cancer biomarkers	Cytosol;Plasma membrane (Enhanced)	Zinc; Copper; Artenimol; Zinc acetate; Zinc chloride; Zinc sulfate, unspecified form	(M17)PID NOTCH PATHWAY; (M255)PID HIF1 TFPATHWAY; (M66)PID MYC ACTIV PATHWAY	(M5891)HALLMARK HYPOXIA; (M5924)HALLMARK MTORC1 SIGNALING; (M5937)HALLMARK GLYCOLYSIS	0	0	0	0	0	0	0	0	0	0	0	0	0	0	0	0	0	0	0	0
ENO2	2026	symbol	H. sapiens	2026	H. sapiens	ENO2	enolase 2	GO:0006096 glycolytic process;GO:0006757 ATP generation from ADP;GO:0046031 ADP metabolic process		ENZYME proteins:Lyases; Predicted intracellular proteins; Cancer-related genes:Candidate cancer biomarkers; Candidate cardiovascular disease genes; Enzymes	Cytosol;Plasma membrane (Supported)	2-Phosphoglycolic Acid		(M5935)HALLMARK FATTY ACID METABOLISM; (M5941)HALLMARK UV RESPONSE UP; (M5902)HALLMARK APOPTOSIS	0	0	0	0	0	0	0	0	0	0	0	0	0	0	0	0	0	0	0	0
ENTPD5	957	symbol	H. sapiens	957	H. sapiens	ENTPD5	ectonucleoside triphosphate diphosphohydrolase 5 (inactive)	GO:0009134 nucleoside diphosphate catabolic process;GO:0045821 positive regulation of glycolytic process;GO:1903580 positive regulation of ATP metabolic process		Predicted intracellular proteins; Predicted secreted proteins; Enzymes; ENZYME proteins:Hydrolases				(M5934)HALLMARK XENOBIOTIC METABOLISM	0	0	0	0	0	0	0	0	0	0	0	0	0	0	0	0	0	0	0	0
EPB41L2	2037	symbol	H. sapiens	2037	H. sapiens	EPB41L2	erythrocyte membrane protein band 4.1 like 2	GO:1904778 positive regulation of protein localization to cell cortex;GO:1904776 regulation of protein localization to cell cortex;GO:0072697 protein localization to cell cortex		Predicted intracellular proteins	Plasma membrane (Enhanced); Additional: Cell Junctions;Nucleoplasm			(M5893)HALLMARK MITOTIC SPINDLE; (M5915)HALLMARK APICAL JUNCTION	0	1	0	0	0	0	0	0	0	0	0	0	0	0	0	0	0	0	0	0
EPC1	80314	symbol	H. sapiens	80314	H. sapiens	EPC1	enhancer of polycomb homolog 1	GO:0043968 histone H2A acetylation;GO:0035886 vascular associated smooth muscle cell differentiation;GO:0045814 negative regulation of gene expression, epigenetic		Predicted intracellular proteins	Nucleoplasm (Supported); Additional: Vesicles				0	0	0	0	0	0	0	0	0	0	0	0	1	0	0	0	0	0	0	0
EPHB1	2047	symbol	H. sapiens	2047	H. sapiens	EPHB1	EPH receptor B1	GO:0014859 negative regulation of skeletal muscle cell proliferation;GO:1902723 negative regulation of skeletal muscle satellite cell proliferation;GO:1902725 negative regulation of satellite cell differentiation	Tyr protein kinase family	Kinases:Tyr protein kinases; Predicted intracellular proteins; Enzymes; ENZYME proteins:Transferases	Cytosol;Endoplasmic reticulum;Plasma membrane (Approved)	Fostamatinib	(M257)PID EPHRINB REV PATHWAY; (M62)PID EPHB FWD PATHWAY		0	0	0	0	0	0	0	0	0	0	0	0	0	0	0	0	0	0	0	0
ERAL1	26284	symbol	H. sapiens	26284	H. sapiens	ERAL1	Era like 12S mitochondrial rRNA chaperone 1	GO:0000028 ribosomal small subunit assembly;GO:0042255 ribosome assembly;GO:0042274 ribosomal small subunit biogenesis		Predicted intracellular proteins; Disease related genes	Mitochondria (Enhanced); Additional: Cytosol				0	0	0	1	0	0	0	0	0	0	0	0	0	0	0	0	0	0	0	0
ERCC3	2071	symbol	H. sapiens	2071	H. sapiens	ERCC3	ERCC excision repair 3, TFIIH core complex helicase subunit	GO:0000717 nucleotide-excision repair, DNA duplex unwinding;GO:0006362 transcription elongation from RNA polymerase I promoter;GO:0033683 nucleotide-excision repair, DNA incision		Disease related genes; Predicted intracellular proteins; Potential drug targets; ENZYME proteins:Hydrolases; Cancer-related genes:Candidate cancer biomarkers; Enzymes	Nucleoplasm (Enhanced)			(M5949)HALLMARK PEROXISOME; (M5898)HALLMARK DNA REPAIR	0	1	1	0	1	0	0	0	0	0	0	0	0	0	0	0	0	0	0	0
ERCC6L	54821	symbol	H. sapiens	54821	H. sapiens	ERCC6L	ERCC excision repair 6 like, spindle assembly checkpoint helicase	GO:0032508 DNA duplex unwinding;GO:0032392 DNA geometric change;GO:0071103 DNA conformation change		Predicted intracellular proteins; Enzymes; ENZYME proteins:Hydrolases	Centrosome (Uncertain); Additional: Cytosol;Nucleoplasm		(M129)PID PLK1 PATHWAY		1	1	1	0	0	0	0	0	0	0	1	0	0	0	0	0	0	0	0	0
ERCC8	1161	symbol	H. sapiens	1161	H. sapiens	ERCC8	ERCC excision repair 8, CSA ubiquitin ligase complex subunit	GO:0090262 regulation of transcription-coupled nucleotide-excision repair;GO:2000819 regulation of nucleotide-excision repair;GO:0097680 double-strand break repair via classical nonhomologous end joining		Predicted intracellular proteins; Disease related genes	Nuclear speckles (Approved)			(M5898)HALLMARK DNA REPAIR	0	0	1	0	0	0	0	0	0	0	0	1	0	0	0	0	0	0	0	0
ERI2	112479	symbol	H. sapiens	112479	H. sapiens	ERI2	ERI1 exoribonuclease family member 2	GO:0000459 exonucleolytic trimming involved in rRNA processing;GO:0000467 exonucleolytic trimming to generate mature 3'-end of 5.8S rRNA from tricistronic rRNA transcript (SSU-rRNA, 5.8S rRNA, LSU-rRNA);GO:0031125 rRNA 3'-end processing		Predicted intracellular proteins	Golgi apparatus;Nucleoplasm (Supported)				0	0	0	0	0	0	0	0	0	0	0	0	0	0	0	0	0	0	0	0
ERLIN1	10613	symbol	H. sapiens	10613	H. sapiens	ERLIN1	ER lipid raft associated 1	GO:0045541 negative regulation of cholesterol biosynthetic process;GO:0090206 negative regulation of cholesterol metabolic process;GO:0106119 negative regulation of sterol biosynthetic process		Potential drug targets; Disease related genes; Transporters:Transporter channels and pores; Predicted intracellular proteins	Endoplasmic reticulum (Supported)				0	0	0	0	0	0	0	0	0	0	0	0	0	0	0	0	0	0	0	0
ERMAP	114625	symbol	H. sapiens	114625	H. sapiens	ERMAP	erythroblast membrane associated protein (Scianna blood group)	GO:0050852 T cell receptor signaling pathway;GO:0050851 antigen receptor-mediated signaling pathway;GO:0002429 immune response-activating cell surface receptor signaling pathway		Predicted intracellular proteins; Blood group antigen proteins	Golgi apparatus (Approved); Additional: Cytosol			(M5945)HALLMARK HEME METABOLISM	0	0	0	0	0	0	0	0	0	0	0	0	0	0	0	0	0	0	0	0
ERV3-1	2086	symbol	H. sapiens	2086	H. sapiens	ERV3-1	endogenous retrovirus group 3 member 1, envelope	GO:0008150 biological_process		Predicted intracellular proteins	Vesicles (Approved)				0	0	0	0	0	0	0	0	0	0	0	0	0	0	0	0	0	0	0	0
ESD	2098	symbol	H. sapiens	2098	H. sapiens	ESD	esterase D	GO:0046294 formaldehyde catabolic process;GO:0046292 formaldehyde metabolic process;GO:0110095 cellular detoxification of aldehyde		Predicted intracellular proteins; Enzymes; ENZYME proteins:Hydrolases	Golgi apparatus (Approved); Additional: Cytosol;Nucleoplasm	Glutathione			0	0	0	0	0	0	0	0	0	0	0	0	0	0	0	0	0	0	0	0
ESPL1	9700	symbol	H. sapiens	9700	H. sapiens	ESPL1	extra spindle pole bodies like 1, separase	GO:0045875 negative regulation of sister chromatid cohesion;GO:0000212 meiotic spindle organization;GO:0045842 positive regulation of mitotic metaphase/anaphase transition		Predicted intracellular proteins; Enzymes; ENZYME proteins:Hydrolases	Nucleoplasm (Supported); Additional: Vesicles			(M5893)HALLMARK MITOTIC SPINDLE; (M5901)HALLMARK G2M CHECKPOINT; (M5925)HALLMARK E2F TARGETS	1	1	0	1	0	0	1	0	1	1	0	1	0	0	0	0	0	0	0	1
ETS1	2113	symbol	H. sapiens	2113	H. sapiens	ETS1	ETS proto-oncogene 1, transcription factor	GO:0030578 PML body organization;GO:0034616 response to laminar fluid shear stress;GO:0030575 nuclear body organization		Predicted intracellular proteins; Transcription factors:Helix-turn-helix domains; RAS pathway related proteins	Nucleoplasm (Enhanced)		(M44)PID HIF2PATHWAY; (M92)PID ANGIOPOIETIN RECEPTOR PATHWAY; (M281)PID FAK PATHWAY	(M5891)HALLMARK HYPOXIA; (M5950)HALLMARK ALLOGRAFT REJECTION; (M5953)HALLMARK KRAS SIGNALING UP	0	0	0	0	0	0	0	0	0	0	0	0	0	0	0	0	0	0	0	0
EXOC1	55763	symbol	H. sapiens	55763	H. sapiens	EXOC1	exocyst complex component 1	GO:0006893 Golgi to plasma membrane transport;GO:0006892 post-Golgi vesicle-mediated transport;GO:0050714 positive regulation of protein secretion		Predicted intracellular proteins; Transporters:Transporter channels and pores	Plasma membrane (Approved); Additional: Cytosol;Microtubules		(M16)PID INSULIN PATHWAY; (M67)PID ARF6 TRAFFICKING PATHWAY		0	0	0	0	0	0	0	0	0	0	0	0	0	1	0	0	0	0	0	0
EXOSC10	5394	symbol	H. sapiens	5394	H. sapiens	EXOSC10	exosome component 10	GO:0071036 nuclear polyadenylation-dependent snoRNA catabolic process;GO:0071037 nuclear polyadenylation-dependent snRNA catabolic process;GO:0071039 nuclear polyadenylation-dependent CUT catabolic process		Predicted intracellular proteins	Nucleoli;Nucleoli rim (Supported); Additional: Cytosol;Nucleoplasm			(M5922)HALLMARK UNFOLDED PROTEIN RESPONSE	0	1	0	0	1	0	0	0	0	0	0	0	0	0	0	0	0	0	0	0
EXOSC8	11340	symbol	H. sapiens	11340	H. sapiens	EXOSC8	exosome component 8	GO:0034473 U1 snRNA 3'-end processing;GO:0034476 U5 snRNA 3'-end processing;GO:0071042 nuclear polyadenylation-dependent mRNA catabolic process		Predicted intracellular proteins; Disease related genes	Mitotic chromosome;Nucleoli fibrillar center;Vesicles (Supported)			(M5925)HALLMARK E2F TARGETS	0	0	0	0	1	0	0	0	0	0	0	0	0	0	0	0	0	0	0	0
EXTL2	2135	symbol	H. sapiens	2135	H. sapiens	EXTL2	exostosin like glycosyltransferase 2	GO:0019276 UDP-N-acetylgalactosamine metabolic process;GO:0006044 N-acetylglucosamine metabolic process;GO:0015012 heparan sulfate proteoglycan biosynthetic process		Predicted intracellular proteins; Enzymes; ENZYME proteins:Transferases	Nucleoplasm (Approved); Additional: Cytosol	Uridine-Diphosphate-N-Acetylgalactosamine; Uridine-Diphosphate-N-Acetylglucosamine; Uridine-5'-Diphosphate			0	0	0	0	0	0	0	0	0	0	0	0	0	0	0	0	0	0	0	0
EZH2	2146	symbol	H. sapiens	2146	H. sapiens	EZH2	enhancer of zeste 2 polycomb repressive complex 2 subunit	GO:0036333 hepatocyte homeostasis;GO:0035983 response to trichostatin A;GO:0035984 cellular response to trichostatin A		Disease related genes; ENZYME proteins:Transferases; Predicted intracellular proteins; Cancer-related genes:Mutational cancer driver genes; Potential drug targets; Cancer-related genes:Candidate cancer biomarkers; Cancer-related genes:Mutated cancer genes; Enzymes	Nucleoplasm (Supported)	Tazemetostat; CPI-1205		(M5951)HALLMARK SPERMATOGENESIS; (M5901)HALLMARK G2M CHECKPOINT; (M5925)HALLMARK E2F TARGETS	0	1	0	0	0	0	0	0	1	0	0	0	1	0	0	1	0	0	0	0
F8	2157	symbol	H. sapiens	2157	H. sapiens	F8	coagulation factor VIII	GO:0007597 blood coagulation, intrinsic pathway;GO:0072378 blood coagulation, fibrin clot formation;GO:0072376 protein activation cascade		Disease related genes; FDA approved drug targets:Biotech drugs; Predicted intracellular proteins; Candidate cardiovascular disease genes; Predicted secreted proteins		Drotrecogin alfa; Coagulation Factor IX (Recombinant); TB-402; Thrombin; Protein C; Human thrombin; Thrombin alfa; Vonicog Alfa; Von Willebrand Factor Human; Anti-inhibitor coagulant complex; Coagulation Factor IX Human; Nonacog beta pegol; Damoctocog alfa pegol		(M5946)HALLMARK COAGULATION; (M5921)HALLMARK COMPLEMENT	0	0	0	0	0	0	0	0	0	0	0	0	0	0	0	0	0	0	0	0
FAF2	23197	symbol	H. sapiens	23197	H. sapiens	FAF2	Fas associated factor family member 2	GO:0034389 lipid droplet organization;GO:0030970 retrograde protein transport, ER to cytosol;GO:1903513 endoplasmic reticulum to cytosol transport		Predicted intracellular proteins	Lipid droplets (Enhanced); Additional: Endoplasmic reticulum				1	0	0	0	0	0	0	0	0	0	0	0	0	0	0	0	0	0	0	0
FAM102B	284611	symbol	H. sapiens	284611	H. sapiens	FAM102B	family with sequence similarity 102 member B			Predicted intracellular proteins	Cytosol;Nucleoli (Approved)				0	0	0	0	0	0	0	0	0	0	0	0	0	0	0	0	0	0	0	0
FAM104B	90736	symbol	H. sapiens	90736	H. sapiens	FAM104B	family with sequence similarity 104 member B			Predicted intracellular proteins					0	0	0	0	0	0	0	0	0	0	0	0	0	0	0	0	0	0	0	0
FAM120B	84498	symbol	H. sapiens	84498	H. sapiens	FAM120B	family with sequence similarity 120B	GO:0035357 peroxisome proliferator activated receptor signaling pathway;GO:0045444 fat cell differentiation;GO:0030522 intracellular receptor signaling pathway		Predicted intracellular proteins	Nucleoplasm (Approved); Additional: Cytosol		(M162)PID RXR VDR PATHWAY		0	0	0	0	0	0	0	0	0	0	0	0	0	0	0	0	0	0	0	0
FAM122B	159090	gene_synonym	H. sapiens	159090	H. sapiens	PABIR2	PABIR family member 2	GO:0043086 negative regulation of catalytic activity;GO:0044092 negative regulation of molecular function;GO:0050790 regulation of catalytic activity		Predicted intracellular proteins	Nucleoplasm (Approved)				0	0	0	0	0	0	0	0	0	0	0	0	0	0	0	0	0	0	0	0
FAM122C	159091	gene_synonym	H. sapiens	159091	H. sapiens	PABIR3	PABIR family member 3	GO:0043086 negative regulation of catalytic activity;GO:0044092 negative regulation of molecular function;GO:0050790 regulation of catalytic activity		Predicted intracellular proteins	Nucleoplasm (Uncertain)				0	0	0	0	0	0	0	0	0	0	0	0	0	0	0	0	0	0	0	0
FAM13B	51306	symbol	H. sapiens	51306	H. sapiens	FAM13B	family with sequence similarity 13 member B	GO:0051056 regulation of small GTPase mediated signal transduction;GO:0007264 small GTPase mediated signal transduction;GO:1902531 regulation of intracellular signal transduction		Predicted intracellular proteins	Nucleoplasm (Approved)				1	0	0	0	0	0	0	0	0	0	0	0	0	0	0	0	0	0	0	0
FAM161A	84140	symbol	H. sapiens	84140	H. sapiens	FAM161A	FAM161 centrosomal protein A	GO:1901985 positive regulation of protein acetylation;GO:1901983 regulation of protein acetylation;GO:0006473 protein acetylation		Predicted intracellular proteins; Disease related genes					0	0	0	0	0	0	0	0	0	0	0	0	1	0	0	0	0	0	0	0
FAM162A	26355	symbol	H. sapiens	26355	H. sapiens	FAM162A	family with sequence similarity 162 member A	GO:0090200 positive regulation of release of cytochrome c from mitochondria;GO:0090199 regulation of release of cytochrome c from mitochondria;GO:0001836 release of cytochrome c from mitochondria			Cytosol;Mitochondria (Enhanced)			(M5891)HALLMARK HYPOXIA; (M5937)HALLMARK GLYCOLYSIS; (M5939)HALLMARK P53 PATHWAY	0	0	0	0	0	0	0	0	0	0	0	0	0	0	0	0	0	0	0	0
FAM192A	80011	gene_synonym	H. sapiens	80011	H. sapiens	PSME3IP1	proteasome activator subunit 3 interacting protein 1	GO:1901799 negative regulation of proteasomal protein catabolic process;GO:1903051 negative regulation of proteolysis involved in cellular protein catabolic process;GO:1903363 negative regulation of cellular protein catabolic process		Predicted intracellular proteins	Nucleoplasm (Supported); Additional: Vesicles				0	0	0	0	0	0	0	0	0	0	0	0	0	0	0	0	0	0	0	0
FAM19A2	338811	gene_synonym	H. sapiens	338811	H. sapiens	TAFA2	TAFA chemokine like family member 2	GO:0008542 visual learning;GO:0007632 visual behavior;GO:0008306 associative learning		Predicted intracellular proteins					0	0	0	0	0	0	0	0	0	0	0	0	0	0	0	0	0	0	0	0
FAM206A	54942	gene_synonym	H. sapiens	54942	H. sapiens	ABITRAM	actin binding transcription modulator	GO:0051489 regulation of filopodium assembly;GO:0046847 filopodium assembly;GO:0048813 dendrite morphogenesis		Predicted intracellular proteins	Cytosol;Nucleoplasm (Supported); Additional: Cytokinetic bridge				0	0	0	0	0	0	0	0	0	0	0	0	0	0	0	0	0	0	0	0
FAM64A	54478	gene_synonym	H. sapiens	54478	H. sapiens	PIMREG	PICALM interacting mitotic regulator	GO:0051301 cell division;GO:0007049 cell cycle;GO:0009987 cellular process		Predicted intracellular proteins	Nucleoplasm (Enhanced)				0	1	0	0	0	0	0	0	0	0	0	0	0	0	0	0	0	0	0	0
FAM83D	81610	symbol	H. sapiens	81610	H. sapiens	FAM83D	family with sequence similarity 83 member D	GO:1902480 protein localization to mitotic spindle;GO:0072698 protein localization to microtubule cytoskeleton;GO:1902808 positive regulation of cell cycle G1/S phase transition		Predicted intracellular proteins	Mitotic spindle (Supported); Additional: Cytokinetic bridge;Cytosol;Microtubules				0	1	0	0	0	0	0	0	1	1	0	0	0	0	0	0	0	0	0	0
FAN1	22909	symbol	H. sapiens	22909	H. sapiens	FAN1	FANCD2 and FANCI associated nuclease 1	GO:0033683 nucleotide-excision repair, DNA incision;GO:0036297 interstrand cross-link repair;GO:0006289 nucleotide-excision repair		Disease related genes; Predicted intracellular proteins; Potential drug targets; ENZYME proteins:Hydrolases; Enzymes	Nucleoplasm (Supported); Additional: Cytokinetic bridge;Cytosol		(M1)PID FANCONI PATHWAY		0	0	1	0	0	0	0	0	0	0	0	0	0	0	0	0	0	0	0	0
FANCC	2176	symbol	H. sapiens	2176	H. sapiens	FANCC	FA complementation group C	GO:0097150 neuronal stem cell population maintenance;GO:0019430 removal of superoxide radicals;GO:0071450 cellular response to oxygen radical		Predicted intracellular proteins; Disease related genes; Cancer-related genes	Nucleoplasm (Supported)		(M258)PID BARD1 PATHWAY; (M1)PID FANCONI PATHWAY	(M5901)HALLMARK G2M CHECKPOINT	0	0	1	0	0	0	0	0	0	0	0	0	0	0	0	0	0	0	0	0
FANCD2	2177	symbol	H. sapiens	2177	H. sapiens	FANCD2	FA complementation group D2	GO:1990918 double-strand break repair involved in meiotic recombination;GO:0031573 mitotic intra-S DNA damage checkpoint signaling;GO:0036297 interstrand cross-link repair		Predicted intracellular proteins; Disease related genes; Cancer-related genes	Nucleoplasm (Supported); Additional: Cytosol;Nuclear bodies;Nucleoli		(M258)PID BARD1 PATHWAY; (M84)PID ATM PATHWAY; (M46)PID ATR PATHWAY		0	1	1	0	0	0	1	0	0	0	0	0	0	0	0	0	1	0	0	0
FANCG	2189	symbol	H. sapiens	2189	H. sapiens	FANCG	FA complementation group G	GO:0036297 interstrand cross-link repair;GO:0001541 ovarian follicle development;GO:0008585 female gonad development		Predicted intracellular proteins; Disease related genes; Cancer-related genes	Cytosol;Plasma membrane (Approved); Additional: Nucleoli		(M258)PID BARD1 PATHWAY; (M1)PID FANCONI PATHWAY		0	0	1	0	0	0	0	1	0	0	0	0	0	0	0	0	0	0	0	0
FANCI	55215	symbol	H. sapiens	55215	H. sapiens	FANCI	FA complementation group I	GO:0031398 positive regulation of protein ubiquitination;GO:1903322 positive regulation of protein modification by small protein conjugation or removal;GO:0031396 regulation of protein ubiquitination		Predicted intracellular proteins; Disease related genes	Nucleoplasm (Enhanced)		(M1)PID FANCONI PATHWAY		0	0	1	0	0	0	0	0	0	0	0	0	0	0	0	0	0	0	0	0
FARSB	10056	symbol	H. sapiens	10056	H. sapiens	FARSB	phenylalanyl-tRNA synthetase subunit beta	GO:0006432 phenylalanyl-tRNA aminoacylation;GO:0051290 protein heterotetramerization;GO:0051291 protein heterooligomerization		Predicted intracellular proteins; ENZYME proteins:Ligase; Enzymes	Nucleoplasm (Supported); Additional: Cytosol	Phenylalanine			0	0	0	0	0	0	0	0	0	0	0	0	0	0	0	0	0	0	0	0
FASTKD1	79675	symbol	H. sapiens	79675	H. sapiens	FASTKD1	FAST kinase domains 1	GO:0044528 regulation of mitochondrial mRNA stability;GO:0000963 mitochondrial RNA processing;GO:0000959 mitochondrial RNA metabolic process		Predicted intracellular proteins					0	0	0	0	1	0	0	0	0	0	0	0	0	0	0	0	0	0	0	0
FASTKD3	79072	symbol	H. sapiens	79072	H. sapiens	FASTKD3	FAST kinase domains 3	GO:0044528 regulation of mitochondrial mRNA stability;GO:0070131 positive regulation of mitochondrial translation;GO:0000963 mitochondrial RNA processing		Predicted intracellular proteins	Mitochondria;Nucleoplasm (Supported)				0	0	0	0	1	0	0	0	0	0	0	0	0	0	0	0	0	0	0	0
FBLN7	129804	symbol	H. sapiens	129804	H. sapiens	FBLN7	fibulin 7	GO:0110151 positive regulation of biomineralization;GO:0110149 regulation of biomineralization;GO:0110148 biomineralization		Predicted intracellular proteins; Predicted secreted proteins	Plasma membrane (Approved); Additional: Cell Junctions		(M3008)NABA ECM GLYCOPROTEINS; (M5884)NABA CORE MATRISOME; (M5889)NABA MATRISOME		0	0	0	0	0	0	0	0	0	0	0	0	0	0	0	0	0	0	0	0
FBXO11	80204	symbol	H. sapiens	80204	H. sapiens	FBXO11	F-box protein 11	GO:0035246 peptidyl-arginine N-methylation;GO:0018216 peptidyl-arginine methylation;GO:0018195 peptidyl-arginine modification		Cancer-related genes:Mutational cancer driver genes; Predicted intracellular proteins; Disease related genes	Nucleoli;Nucleoplasm (Supported)		(M261)PID P53 REGULATION PATHWAY		0	0	0	0	0	0	0	0	0	0	0	1	0	0	0	0	0	0	0	0
FBXO38	81545	symbol	H. sapiens	81545	H. sapiens	FBXO38	F-box protein 38	GO:0002842 positive regulation of T cell mediated immune response to tumor cell;GO:0002840 regulation of T cell mediated immune response to tumor cell;GO:0002424 T cell mediated immune response to tumor cell		Predicted intracellular proteins; Disease related genes	Nucleoplasm;Plasma membrane (Supported); Additional: Cytokinetic bridge;Cytosol				0	0	0	0	0	0	0	0	0	0	0	0	0	0	0	0	0	0	0	0
FBXO43	286151	symbol	H. sapiens	286151	H. sapiens	FBXO43	F-box protein 43	GO:0045835 negative regulation of meiotic nuclear division;GO:0051447 negative regulation of meiotic cell cycle;GO:0040020 regulation of meiotic nuclear division		Predicted intracellular proteins					0	1	0	0	0	0	1	0	0	0	0	1	0	0	0	0	0	0	0	0
FBXO48	554251	symbol	H. sapiens	554251	H. sapiens	FBXO48	F-box protein 48	GO:0031146 SCF-dependent proteasomal ubiquitin-dependent protein catabolic process;GO:0043161 proteasome-mediated ubiquitin-dependent protein catabolic process;GO:0010498 proteasomal protein catabolic process		Predicted intracellular proteins	Nuclear bodies (Approved)				0	0	0	0	0	0	0	0	0	0	0	0	0	0	0	0	0	0	0	0
FBXO5	26271	symbol	H. sapiens	26271	H. sapiens	FBXO5	F-box protein 5	GO:0032876 negative regulation of DNA endoreduplication;GO:0007057 spindle assembly involved in female meiosis I;GO:1905319 mesenchymal stem cell migration		Predicted intracellular proteins	Nucleoplasm (Supported)		(M129)PID PLK1 PATHWAY	(M5893)HALLMARK MITOTIC SPINDLE; (M5901)HALLMARK G2M CHECKPOINT	1	1	1	1	0	1	1	1	1	0	1	1	0	0	0	0	1	0	0	0
FBXO7	25793	symbol	H. sapiens	25793	H. sapiens	FBXO7	F-box protein 7	GO:1903599 positive regulation of autophagy of mitochondrion;GO:1903204 negative regulation of oxidative stress-induced neuron death;GO:1903203 regulation of oxidative stress-induced neuron death		Predicted intracellular proteins; Disease related genes	Cytosol;Nucleoplasm (Supported)			(M5945)HALLMARK HEME METABOLISM	0	1	0	0	0	0	0	0	0	0	0	1	0	0	0	0	0	0	0	0
FGFR1OP	11116	gene_synonym	H. sapiens	11116	H. sapiens	CEP43	centrosomal protein 43	GO:0034453 microtubule anchoring;GO:0061099 negative regulation of protein tyrosine kinase activity;GO:0050732 negative regulation of peptidyl-tyrosine phosphorylation		Predicted intracellular proteins; Disease related genes; Cancer-related genes	Centrosome (Supported)				1	0	0	1	0	0	0	0	0	0	0	0	0	1	0	0	0	0	0	0
FKBP15	23307	symbol	H. sapiens	23307	H. sapiens	FKBP15	FKBP prolyl isomerase family member 15	GO:0000413 protein peptidyl-prolyl isomerization;GO:0018208 peptidyl-proline modification;GO:0006897 endocytosis		Predicted intracellular proteins	Nucleoli (Approved); Additional: Cytosol				0	0	0	0	0	0	0	0	0	0	0	0	0	0	0	0	0	0	0	0
FKBP7	51661	symbol	H. sapiens	51661	H. sapiens	FKBP7	FKBP prolyl isomerase 7	GO:0000413 protein peptidyl-prolyl isomerization;GO:0018208 peptidyl-proline modification;GO:0018193 peptidyl-amino acid modification		Predicted intracellular proteins; ENZYME proteins:Isomerase; Enzymes	Endoplasmic reticulum (Approved)				0	0	0	0	0	0	0	0	0	0	0	0	0	0	0	0	0	0	0	0
FKTN	2218	symbol	H. sapiens	2218	H. sapiens	FKTN	fukutin	GO:0060049 regulation of protein glycosylation;GO:0035269 protein O-linked mannosylation;GO:0035268 protein mannosylation		Predicted intracellular proteins; Disease related genes					0	0	0	0	0	0	0	0	0	0	0	0	0	0	0	0	0	0	0	0
FLJ37201	283011	symbol	H. sapiens	283011	H. sapiens	FLJ37201	tigger transposable element derived 2 pseudogene								0	0	0	0	0	0	0	0	0	0	0	0	0	0	0	0	0	0	0	0
FMOD	2331	symbol	H. sapiens	2331	H. sapiens	FMOD	fibromodulin	GO:0007181 transforming growth factor beta receptor complex assembly;GO:0030199 collagen fibril organization;GO:0007179 transforming growth factor beta receptor signaling pathway		Predicted secreted proteins			(M5882)NABA PROTEOGLYCANS; (M5884)NABA CORE MATRISOME; (M5889)NABA MATRISOME	(M5930)HALLMARK EPITHELIAL MESENCHYMAL TRANSITION	0	0	0	0	0	0	0	0	0	0	0	0	0	0	0	0	0	0	0	0
FNBP4	23360	symbol	H. sapiens	23360	H. sapiens	FNBP4	formin binding protein 4			Predicted intracellular proteins	Nuclear speckles (Enhanced)				0	0	0	0	0	0	0	0	0	0	0	0	0	0	0	0	0	0	0	0
FOXJ2	55810	symbol	H. sapiens	55810	H. sapiens	FOXJ2	forkhead box J2	GO:0110059 negative regulation of blood vessel endothelial cell differentiation;GO:0110057 regulation of blood vessel endothelial cell differentiation;GO:0060837 blood vessel endothelial cell differentiation		Predicted intracellular proteins; Transcription factors:Helix-turn-helix domains	Nucleoplasm (Supported); Additional: Nucleoli fibrillar center			(M5945)HALLMARK HEME METABOLISM	0	1	0	0	0	0	1	0	0	0	0	0	0	0	0	0	0	0	0	0
FOXJ3	22887	symbol	H. sapiens	22887	H. sapiens	FOXJ3	forkhead box J3	GO:0007141 male meiosis I;GO:0007140 male meiotic nuclear division;GO:0007127 meiosis I		Predicted intracellular proteins; Transcription factors:Helix-turn-helix domains	Nuclear speckles;Nucleoplasm (Approved); Additional: Vesicles				0	1	0	0	0	0	1	0	0	0	0	0	0	0	0	0	0	0	0	0
FOXM1	2305	symbol	H. sapiens	2305	H. sapiens	FOXM1	forkhead box M1	GO:0006978 DNA damage response, signal transduction by p53 class mediator resulting in transcription of p21 class mediator;GO:0042772 DNA damage response, signal transduction resulting in transcription;GO:0090344 negative regulation of cell aging		Predicted intracellular proteins; Transcription factors:Helix-turn-helix domains; Cancer-related genes:Candidate cancer biomarkers	Nucleoli;Nucleoli rim;Nucleoplasm (Supported); Additional: Cytosol		(M176)PID FOXM1 PATHWAY		1	1	1	0	0	0	0	0	0	0	0	0	0	1	0	0	1	0	0	0
FPR1	2357	symbol	H. sapiens	2357	H. sapiens	FPR1	formyl peptide receptor 1	GO:0002430 complement receptor mediated signaling pathway;GO:0007263 nitric oxide mediated signal transduction;GO:0007200 phospholipase C-activating G protein-coupled receptor signaling pathway		G-protein coupled receptors:Chemokines and chemotactic factors receptors; G-protein coupled receptors:GPCRs excl olfactory receptors	Golgi apparatus (Approved); Additional: Nucleoli;Nucleoplasm	Nedocromil	(M174)PID UPA UPAR PATHWAY	(M5913)HALLMARK INTERFERON GAMMA RESPONSE; (M5932)HALLMARK INFLAMMATORY RESPONSE	0	0	0	0	0	0	0	0	0	0	0	0	0	0	0	0	0	0	0	0
FUBP1	8880	symbol	H. sapiens	8880	H. sapiens	FUBP1	far upstream element binding protein 1	GO:0010628 positive regulation of gene expression;GO:0010604 positive regulation of macromolecule metabolic process;GO:0009893 positive regulation of metabolic process		Predicted intracellular proteins; Cancer-related genes	Nucleoplasm (Enhanced)	Irofulven; Sacituzumab govitecan			0	0	0	0	0	0	0	0	0	0	0	0	0	0	0	0	0	0	0	0
G2E3	55632	symbol	H. sapiens	55632	H. sapiens	G2E3	G2/M-phase specific E3 ubiquitin protein ligase	GO:0016567 protein ubiquitination;GO:0032446 protein modification by small protein conjugation;GO:0070647 protein modification by small protein conjugation or removal		Predicted intracellular proteins; Enzymes; ENZYME proteins:Transferases	Cytosol (Approved); Additional: Golgi apparatus;Vesicles				0	0	0	0	0	0	0	0	0	0	0	0	0	0	0	0	0	0	0	0
GABBR1	2550	symbol	H. sapiens	2550	H. sapiens	GABBR1	gamma-aminobutyric acid type B receptor subunit 1	GO:0150099 neuron-glial cell signaling;GO:0007214 gamma-aminobutyric acid signaling pathway;GO:0007193 adenylate cyclase-inhibiting G protein-coupled receptor signaling pathway		G-protein coupled receptors:Family 3 (C) receptors; FDA approved drug targets:Small molecule drugs; Predicted intracellular proteins; G-protein coupled receptors:GPCRs excl olfactory receptors	Centrosome (Approved)	Baclofen; Progabide; Taurine; gamma-Aminobutyric acid; SGS-742; Tezampanel; Arbaclofen; Arbaclofen Placarbil		(M5932)HALLMARK INFLAMMATORY RESPONSE	0	0	0	0	0	0	0	0	0	0	0	0	0	0	0	0	0	0	0	0
GABRE	2564	symbol	H. sapiens	2564	H. sapiens	GABRE	gamma-aminobutyric acid type A receptor subunit epsilon	GO:2001226 negative regulation of chloride transport;GO:2001225 regulation of chloride transport;GO:1903792 negative regulation of anion transport		FDA approved drug targets:Small molecule drugs		Ethanol; Fludiazepam			0	0	0	0	0	0	0	0	0	0	0	0	0	0	0	0	0	0	0	0
GALC	2581	symbol	H. sapiens	2581	H. sapiens	GALC	galactosylceramidase	GO:0006683 galactosylceramide catabolic process;GO:0019376 galactolipid catabolic process;GO:0046477 glycosylceramide catabolic process		Disease related genes; Predicted intracellular proteins; Potential drug targets; ENZYME proteins:Hydrolases; Enzymes				(M5910)HALLMARK PROTEIN SECRETION	0	0	0	0	0	0	0	0	0	0	0	0	0	0	0	0	0	0	0	0
GALNT15	117248	symbol	H. sapiens	117248	H. sapiens	GALNT15	polypeptide N-acetylgalactosaminyltransferase 15	GO:0016266 O-glycan processing;GO:0006493 protein O-linked glycosylation;GO:0006486 protein glycosylation		Predicted intracellular proteins; Enzymes; ENZYME proteins:Transferases	Golgi apparatus (Approved); Additional: Cytosol				0	0	0	0	0	0	0	0	0	0	0	0	0	0	0	0	0	0	0	0
GANAB	23193	symbol	H. sapiens	23193	H. sapiens	GANAB	glucosidase II alpha subunit	GO:0006491 N-glycan processing;GO:0009100 glycoprotein metabolic process;GO:0005975 carbohydrate metabolic process		Disease related genes; Predicted intracellular proteins; ENZYME proteins:Hydrolases; FDA approved drug targets:Small molecule drugs; Enzymes	Endoplasmic reticulum (Approved)	Miglitol			0	0	0	0	0	0	0	0	0	0	0	0	0	0	0	0	0	0	0	0
GANC	2595	symbol	H. sapiens	2595	H. sapiens	GANC	glucosidase alpha, neutral C	GO:0000023 maltose metabolic process;GO:0005984 disaccharide metabolic process;GO:0006491 N-glycan processing		FDA approved drug targets:Small molecule drugs; Predicted intracellular proteins; Enzymes; ENZYME proteins:Hydrolases	Cytosol (Approved)	Miglitol			0	0	0	0	0	0	0	0	0	0	0	0	0	0	0	0	0	0	0	0
GAPDH	2597	symbol	H. sapiens	2597	H. sapiens	GAPDH	glyceraldehyde-3-phosphate dehydrogenase	GO:0035606 peptidyl-cysteine S-trans-nitrosylation;GO:0017014 protein nitrosylation;GO:0018119 peptidyl-cysteine S-nitrosylation		ENZYME proteins:Oxidoreductases; FDA approved drug targets:Small molecule drugs; Predicted intracellular proteins; Enzymes	Cytosol;Plasma membrane (Supported); Additional: Nuclear membrane;Vesicles	NADH; Adenosine-5-Diphosphoribose; Thionicotinamide-Adenine-Dinucleotide; 4-(2-Aminoethyl)Benzenesulfonyl Fluoride; Xanthinol; Copper; Artenimol	(M66)PID MYC ACTIV PATHWAY; (M5493)WNT SIGNALING	(M5891)HALLMARK HYPOXIA; (M5924)HALLMARK MTORC1 SIGNALING	0	0	0	1	0	0	0	0	0	0	0	0	0	0	0	0	0	0	0	0
GAS2L3	283431	symbol	H. sapiens	283431	H. sapiens	GAS2L3	growth arrest specific 2 like 3	GO:0051764 actin crosslink formation;GO:0007015 actin filament organization;GO:0000226 microtubule cytoskeleton organization		Predicted intracellular proteins					0	0	0	1	0	0	0	0	0	0	0	0	0	0	0	0	0	0	0	0
GATB	5188	symbol	H. sapiens	5188	H. sapiens	GATB	glutamyl-tRNA amidotransferase subunit B	GO:0070681 glutaminyl-tRNAGln biosynthesis via transamidation;GO:0043039 tRNA aminoacylation;GO:0043038 amino acid activation		Predicted intracellular proteins	Mitochondria (Supported)				0	0	0	0	0	0	0	0	0	0	0	0	0	0	0	0	0	0	0	0
GDNF-AS1	100861519	symbol	H. sapiens	100861519	H. sapiens	GDNF-AS1	GDNF antisense RNA 1								0	0	0	0	0	0	0	0	0	0	0	0	0	0	0	0	0	0	0	0
GEMIN2	8487	symbol	H. sapiens	8487	H. sapiens	GEMIN2	gem nuclear organelle associated protein 2	GO:1905215 negative regulation of RNA binding;GO:1905214 regulation of RNA binding;GO:0000387 spliceosomal snRNP assembly		Predicted intracellular proteins	Nuclear bodies;Nucleoplasm (Supported); Additional: Nucleoli				0	0	0	0	1	0	0	0	0	0	0	0	0	0	0	0	0	0	0	0
GEN1	348654	symbol	H. sapiens	348654	H. sapiens	GEN1	GEN1 Holliday junction 5' flap endonuclease	GO:0071139 resolution of recombination intermediates;GO:0071140 resolution of mitotic recombination intermediates;GO:0090232 positive regulation of spindle checkpoint		Predicted intracellular proteins	Nucleoplasm (Approved)				0	1	1	1	0	1	0	0	1	0	0	0	0	0	1	0	0	0	0	0
GGH	8836	symbol	H. sapiens	8836	H. sapiens	GGH	gamma-glutamyl hydrolase	GO:0070500 poly-gamma-glutamate metabolic process;GO:0046900 tetrahydrofolylpolyglutamate metabolic process;GO:0006760 folic acid-containing compound metabolic process		Predicted intracellular proteins; Peptidases:Cysteine-type peptidases; Enzymes; ENZYME proteins:Hydrolases				(M5941)HALLMARK UV RESPONSE UP	0	0	0	0	0	0	0	0	0	0	0	0	0	0	0	0	0	0	0	0
GIN1	54826	symbol	H. sapiens	54826	H. sapiens	GIN1	gypsy retrotransposon integrase 1	GO:0015074 DNA integration;GO:0006259 DNA metabolic process;GO:0090304 nucleic acid metabolic process		Predicted intracellular proteins	Nucleoli;Nucleoplasm (Approved)				0	0	0	0	0	0	0	0	0	0	0	0	0	0	0	0	0	0	0	0
GLCE	26035	symbol	H. sapiens	26035	H. sapiens	GLCE	glucuronic acid epimerase	GO:0030210 heparin biosynthetic process;GO:0030202 heparin metabolic process;GO:0015012 heparan sulfate proteoglycan biosynthetic process		Predicted intracellular proteins; ENZYME proteins:Isomerase; Enzymes	Mitochondria (Approved)			(M5937)HALLMARK GLYCOLYSIS	0	0	0	0	0	0	0	0	0	0	0	0	0	0	0	0	0	0	0	0
GLT8D1	55830	symbol	H. sapiens	55830	H. sapiens	GLT8D1	glycosyltransferase 8 domain containing 1			Predicted intracellular proteins	Mitochondria (Approved)				0	0	0	0	0	0	0	0	0	0	0	0	0	0	0	0	0	0	0	0
GLTSCR1L	23506	gene_synonym	H. sapiens	23506	H. sapiens	BICRAL	BICRA like chromatin remodeling complex associated protein	GO:0045893 positive regulation of transcription, DNA-templated;GO:1903508 positive regulation of nucleic acid-templated transcription;GO:1902680 positive regulation of RNA biosynthetic process		Predicted intracellular proteins	Nucleoplasm (Supported)				0	0	0	0	0	0	0	0	0	0	0	0	0	0	0	0	0	0	0	0
GMNN	51053	symbol	H. sapiens	51053	H. sapiens	GMNN	geminin DNA replication inhibitor	GO:0071163 DNA replication preinitiation complex assembly;GO:0035563 positive regulation of chromatin binding;GO:2000104 negative regulation of DNA-dependent DNA replication		Predicted intracellular proteins; Disease related genes; Cancer-related genes:Candidate cancer biomarkers	Nucleoplasm (Enhanced)				1	1	0	0	0	1	0	1	0	0	0	0	0	0	0	0	0	0	0	0
GNB3	2784	symbol	H. sapiens	2784	H. sapiens	GNB3	G protein subunit beta 3	GO:0090325 regulation of locomotion involved in locomotory behavior;GO:0031987 locomotion involved in locomotory behavior;GO:0060259 regulation of feeding behavior		Predicted intracellular proteins; Disease related genes; RAS pathway related proteins	Plasma membrane (Approved); Additional: Golgi apparatus		(M117)PID CONE PATHWAY		0	0	0	0	0	0	0	0	0	0	0	0	0	0	0	0	0	0	0	0
GNRH1	2796	symbol	H. sapiens	2796	H. sapiens	GNRH1	gonadotropin releasing hormone 1	GO:1990637 response to prolactin;GO:0033087 negative regulation of immature T cell proliferation;GO:2000354 regulation of ovarian follicle development		Disease related genes; Predicted secreted proteins			(M213)PID AR NONGENOMIC PATHWAY		0	0	0	0	0	0	0	0	0	0	0	0	0	0	0	0	0	0	0	0
GOLGA1	2800	symbol	H. sapiens	2800	H. sapiens	GOLGA1	golgin A1			Predicted intracellular proteins	Golgi apparatus (Enhanced)				0	0	0	0	0	0	0	0	0	0	0	0	0	0	0	0	0	0	0	0
GOLGA5	9950	symbol	H. sapiens	9950	H. sapiens	GOLGA5	golgin A5	GO:0000301 retrograde transport, vesicle recycling within Golgi;GO:0006891 intra-Golgi vesicle-mediated transport;GO:0007030 Golgi organization		Cancer-related genes:Mutational cancer driver genes; Predicted intracellular proteins; Disease related genes	Golgi apparatus (Supported)				0	0	0	0	0	0	0	0	0	0	0	0	0	0	0	0	0	0	0	0
GOLM1	51280	symbol	H. sapiens	51280	H. sapiens	GOLM1	golgi membrane protein 1	GO:0006997 nucleus organization;GO:0019216 regulation of lipid metabolic process;GO:0006629 lipid metabolic process		Predicted intracellular proteins	Golgi apparatus (Enhanced)				0	0	0	0	0	0	0	0	0	0	0	0	0	0	0	0	0	0	0	0
GPATCH1	55094	symbol	H. sapiens	55094	H. sapiens	GPATCH1	G-patch domain containing 1	GO:0000377 RNA splicing, via transesterification reactions with bulged adenosine as nucleophile;GO:0000398 mRNA splicing, via spliceosome;GO:0000375 RNA splicing, via transesterification reactions		Predicted intracellular proteins	Cell Junctions;Nucleoplasm;Plasma membrane (Uncertain)				0	0	0	0	1	0	0	0	0	0	0	0	0	0	0	0	0	0	0	0
GPATCH8	23131	symbol	H. sapiens	23131	H. sapiens	GPATCH8	G-patch domain containing 8	GO:0008150 biological_process		Predicted intracellular proteins	Nuclear speckles (Approved); Additional: Mitochondria				0	0	0	0	0	0	0	0	0	0	0	0	0	0	0	0	0	0	0	0
GPR137C	283554	symbol	H. sapiens	283554	H. sapiens	GPR137C	G protein-coupled receptor 137C	GO:1904263 positive regulation of TORC1 signaling;GO:1903432 regulation of TORC1 signaling;GO:0032008 positive regulation of TOR signaling			Vesicles (Approved)				0	0	0	0	0	0	0	0	0	0	0	0	0	0	0	0	0	0	0	0
GPSM2	29899	symbol	H. sapiens	29899	H. sapiens	GPSM2	G protein signaling modulator 2	GO:0031291 Ran protein signal transduction;GO:1905832 positive regulation of spindle assembly;GO:1904778 positive regulation of protein localization to cell cortex		Predicted intracellular proteins; Disease related genes	Cytosol (Supported)				0	1	0	1	0	0	0	0	1	1	0	0	0	0	0	0	0	0	0	0
GPX8	493869	symbol	H. sapiens	493869	H. sapiens	GPX8	glutathione peroxidase 8 (putative)	GO:0098869 cellular oxidant detoxification;GO:1990748 cellular detoxification;GO:0097237 cellular response to toxic substance		ENZYME proteins:Oxidoreductases; Predicted intracellular proteins; Enzymes	Cytosol;Plasma membrane (Approved); Additional: Actin filaments			(M5892)HALLMARK CHOLESTEROL HOMEOSTASIS	0	0	0	0	0	0	0	0	0	0	0	0	0	0	0	0	0	0	0	0
GTF3C2	2976	symbol	H. sapiens	2976	H. sapiens	GTF3C2	general transcription factor IIIC subunit 2	GO:0042791 5S class rRNA transcription by RNA polymerase III;GO:0042797 tRNA transcription by RNA polymerase III;GO:0009304 tRNA transcription		Predicted intracellular proteins	Nucleoplasm (Supported)				0	0	0	0	0	0	0	0	0	0	0	0	0	0	0	0	0	0	0	0
GTF3C3	9330	symbol	H. sapiens	9330	H. sapiens	GTF3C3	general transcription factor IIIC subunit 3	GO:0042791 5S class rRNA transcription by RNA polymerase III;GO:0042797 tRNA transcription by RNA polymerase III;GO:0009304 tRNA transcription		Predicted intracellular proteins	Nuclear membrane;Nucleoplasm (Supported)				0	0	0	0	0	0	0	0	0	0	0	0	0	0	0	0	0	0	0	0
GTSE1	51512	symbol	H. sapiens	51512	H. sapiens	GTSE1	G2 and S-phase expressed 1	GO:0006977 DNA damage response, signal transduction by p53 class mediator resulting in cell cycle arrest;GO:0031571 mitotic G1 DNA damage checkpoint signaling;GO:0044819 mitotic G1/S transition checkpoint signaling		Predicted intracellular proteins	Centrosome (Approved); Additional: Plasma membrane				1	1	1	0	0	0	0	0	0	0	0	0	0	1	0	0	1	0	0	0
H1F0	3005	gene_synonym	H. sapiens	3005	H. sapiens	H1-0	H1.0 linker histone	GO:0016584 nucleosome positioning;GO:2000679 positive regulation of transcription regulatory region DNA binding;GO:0045910 negative regulation of DNA recombination		Predicted intracellular proteins	Nuclear bodies;Nucleoplasm (Supported); Additional: Actin filaments;Golgi apparatus			(M5908)HALLMARK ANDROGEN RESPONSE; (M5902)HALLMARK APOPTOSIS; (M5945)HALLMARK HEME METABOLISM	0	0	1	0	0	0	0	0	0	0	0	0	0	0	0	0	0	1	0	0
H2AFZ	3015	gene_synonym	H. sapiens	3015	H. sapiens	H2AZ1	H2A.Z variant histone 1	GO:0071392 cellular response to estradiol stimulus;GO:0032355 response to estradiol;GO:0071396 cellular response to lipid		Predicted intracellular proteins	Nucleoplasm (Supported)		(M195)PID CMYB PATHWAY	(M5935)HALLMARK FATTY ACID METABOLISM; (M5901)HALLMARK G2M CHECKPOINT; (M5925)HALLMARK E2F TARGETS	1	0	1	0	0	0	0	1	0	0	0	0	1	0	0	0	0	1	1	0
HACD4	401494	symbol	H. sapiens	401494	H. sapiens	HACD4	3-hydroxyacyl-CoA dehydratase 4	GO:0030497 fatty acid elongation;GO:0042761 very long-chain fatty acid biosynthetic process;GO:0000038 very long-chain fatty acid metabolic process		ENZYME proteins:Lyases; Enzymes					0	0	0	0	0	0	0	0	0	0	0	0	0	0	0	0	0	0	0	0
HARS2	23438	symbol	H. sapiens	23438	H. sapiens	HARS2	histidyl-tRNA synthetase 2, mitochondrial	GO:0006427 histidyl-tRNA aminoacylation;GO:0006418 tRNA aminoacylation for protein translation;GO:0043039 tRNA aminoacylation		Disease related genes; ENZYME proteins:Ligase; Predicted intracellular proteins; Potential drug targets; Enzymes	Cytosol (Approved)				0	0	0	0	0	0	0	0	0	0	0	0	0	0	0	0	0	0	0	0
HAT1	8520	symbol	H. sapiens	8520	H. sapiens	HAT1	histone acetyltransferase 1	GO:0006335 DNA replication-dependent nucleosome assembly;GO:0034723 DNA replication-dependent nucleosome organization;GO:0006336 DNA replication-independent nucleosome assembly		Predicted intracellular proteins; Enzymes; ENZYME proteins:Transferases	Nucleoplasm (Supported)				0	0	1	0	0	0	0	0	0	0	0	0	1	0	0	0	0	1	0	0
HAUS1	115106	symbol	H. sapiens	115106	H. sapiens	HAUS1	HAUS augmin like complex subunit 1	GO:0007098 centrosome cycle;GO:0051225 spindle assembly;GO:0031023 microtubule organizing center organization		Predicted intracellular proteins	Cytosol (Supported); Additional: Centrosome				1	1	0	1	0	0	0	0	0	0	0	0	0	1	1	0	0	0	0	0
HAUS3	79441	symbol	H. sapiens	79441	H. sapiens	HAUS3	HAUS augmin like complex subunit 3	GO:0007098 centrosome cycle;GO:0051225 spindle assembly;GO:0031023 microtubule organizing center organization		Predicted intracellular proteins	Microtubules;Mitochondria (Approved); Additional: Cytokinetic bridge;Mitotic spindle				1	1	0	1	0	0	0	0	0	0	0	0	0	1	1	0	0	0	0	0
HAUS8	93323	symbol	H. sapiens	93323	H. sapiens	HAUS8	HAUS augmin like complex subunit 8	GO:0007098 centrosome cycle;GO:0051225 spindle assembly;GO:0031023 microtubule organizing center organization		Predicted intracellular proteins					1	1	0	1	0	0	0	0	0	0	0	0	0	1	1	0	0	0	0	0
HCLS1	3059	symbol	H. sapiens	3059	H. sapiens	HCLS1	hematopoietic cell-specific Lyn substrate 1	GO:0030854 positive regulation of granulocyte differentiation;GO:0030852 regulation of granulocyte differentiation;GO:0045651 positive regulation of macrophage differentiation		Predicted intracellular proteins	Cytosol;Plasma membrane (Supported)		(M7)PID FCER1 PATHWAY	(M5898)HALLMARK DNA REPAIR; (M5950)HALLMARK ALLOGRAFT REJECTION	0	0	0	0	0	0	0	0	0	0	0	0	0	0	0	0	0	0	0	0
HDAC2	3066	symbol	H. sapiens	3066	H. sapiens	HDAC2	histone deacetylase 2	GO:1902435 regulation of male mating behavior;GO:1902437 positive regulation of male mating behavior;GO:0061198 fungiform papilla formation		Predicted intracellular proteins; ENZYME proteins:Hydrolases; Cancer-related genes:Candidate cancer biomarkers; FDA approved drug targets:Small molecule drugs; Enzymes	Nucleoplasm (Supported)	Pravastatin; Lovastatin; Theophylline; Valproic acid; Simvastatin; Atorvastatin; Fluvastatin; Aminophylline; Oxtriphylline; Vorinostat; Pracinostat; Romidepsin; Tixocortol; Mocetinostat	(M219)PID HEDGEHOG GLI PATHWAY; (M101)PID HDAC CLASSI PATHWAY; (M105)PID TELOMERASE PATHWAY	(M5895)HALLMARK WNT BETA CATENIN SIGNALING; (M5926)HALLMARK MYC TARGETS V1	0	1	1	0	0	0	0	0	0	0	0	1	1	0	0	0	0	0	0	1
HDAC3	8841	symbol	H. sapiens	8841	H. sapiens	HDAC3	histone deacetylase 3	GO:0070933 histone H4 deacetylation;GO:0010832 negative regulation of myotube differentiation;GO:0070932 histone H3 deacetylation		FDA approved drug targets:Small molecule drugs; Predicted intracellular proteins; Enzymes; ENZYME proteins:Hydrolases	Nucleoplasm (Supported); Additional: Golgi apparatus	Vorinostat; Pracinostat; Mocetinostat	(M207)PID RETINOIC ACID PATHWAY; (M30)PID HDAC CLASSII PATHWAY; (M254)PID MYC REPRESS PATHWAY	(M5939)HALLMARK P53 PATHWAY	0	0	0	1	0	0	0	0	0	0	0	0	1	1	0	0	0	0	0	0
HERC3	8916	symbol	H. sapiens	8916	H. sapiens	HERC3	HECT and RLD domain containing E3 ubiquitin protein ligase 3	GO:0016567 protein ubiquitination;GO:0032446 protein modification by small protein conjugation;GO:0070647 protein modification by small protein conjugation or removal		Predicted intracellular proteins; Enzymes; ENZYME proteins:Transferases	Cytosol (Approved)			(M5908)HALLMARK ANDROGEN RESPONSE	0	0	0	0	0	0	0	0	0	0	0	1	0	0	0	0	0	0	0	0
HFE	3077	symbol	H. sapiens	3077	H. sapiens	HFE	homeostatic iron regulator	GO:0002626 negative regulation of T cell antigen processing and presentation;GO:0010106 cellular response to iron ion starvation;GO:1904282 regulation of antigen processing and presentation of endogenous peptide antigen via MHC class I		Disease related genes	Plasma membrane (Supported); Additional: Nucleoplasm				0	0	0	0	0	0	0	0	0	0	0	0	0	0	0	0	0	0	0	0
HHIPL2	79802	symbol	H. sapiens	79802	H. sapiens	HHIPL2	HHIP like 2			Predicted secreted proteins	Mitochondria (Uncertain); Additional: Cytosol				0	0	0	0	0	0	0	0	0	0	0	0	0	0	0	0	0	0	0	0
HILPDA	29923	symbol	H. sapiens	29923	H. sapiens	HILPDA	hypoxia inducible lipid droplet associated	GO:0035425 autocrine signaling;GO:0010884 positive regulation of lipid storage;GO:0010883 regulation of lipid storage			Lipid droplets (Supported); Additional: Nucleoplasm				0	0	0	0	0	0	0	0	0	0	0	0	0	0	0	0	0	0	0	0
HIRIP3	8479	symbol	H. sapiens	8479	H. sapiens	HIRIP3	HIRA interacting protein 3	GO:0006333 chromatin assembly or disassembly;GO:0006325 chromatin organization;GO:0051276 chromosome organization		Predicted intracellular proteins	Nucleoplasm (Enhanced)				0	0	0	0	0	0	0	0	0	0	0	0	0	0	0	0	0	0	0	0
HJURP	55355	symbol	H. sapiens	55355	H. sapiens	HJURP	Holliday junction recognition protein	GO:0034080 CENP-A containing nucleosome assembly;GO:0061641 CENP-A containing chromatin organization;GO:0031055 chromatin remodeling at centromere		Predicted intracellular proteins	Nucleoli;Nucleoli rim;Nucleoplasm (Enhanced); Additional: Mitochondria				1	1	1	0	0	0	0	0	0	0	0	0	0	0	0	0	0	1	1	0
HLA-J	3137	symbol	H. sapiens	3137	H. sapiens	HLA-J	major histocompatibility complex, class I, J (pseudogene)								0	0	0	0	0	0	0	0	0	0	0	0	0	0	0	0	0	0	0	0
HMGB2	3148	symbol	H. sapiens	3148	H. sapiens	HMGB2	high mobility group box 2	GO:0032075 positive regulation of nuclease activity;GO:0006265 DNA topological change;GO:0045654 positive regulation of megakaryocyte differentiation		Predicted intracellular proteins	Nucleoplasm (Supported); Additional: Nucleoli			(M5902)HALLMARK APOPTOSIS; (M5925)HALLMARK E2F TARGETS	0	0	1	0	0	0	0	1	0	0	0	0	0	0	0	0	0	1	0	0
HMGB3	3149	symbol	H. sapiens	3149	H. sapiens	HMGB3	high mobility group box 3	GO:0032392 DNA geometric change;GO:0071103 DNA conformation change;GO:0006310 DNA recombination		Predicted intracellular proteins; Disease related genes	Nucleoli;Nucleoplasm (Approved)			(M5901)HALLMARK G2M CHECKPOINT; (M5925)HALLMARK E2F TARGETS	0	0	1	0	0	0	0	0	0	0	0	0	0	0	0	0	0	0	0	0
HMGN3	9324	symbol	H. sapiens	9324	H. sapiens	HMGN3	high mobility group nucleosomal binding domain 3	GO:0061178 regulation of insulin secretion involved in cellular response to glucose stimulus;GO:0035773 insulin secretion involved in cellular response to glucose stimulus;GO:0071333 cellular response to glucose stimulus		Predicted intracellular proteins	Nucleoplasm (Supported); Additional: Cytosol				0	0	0	0	0	0	0	0	0	0	0	0	0	0	0	0	0	0	0	0
HMGXB4	10042	symbol	H. sapiens	10042	H. sapiens	HMGXB4	HMG-box containing 4	GO:0008333 endosome to lysosome transport;GO:0007041 lysosomal transport;GO:0007034 vacuolar transport		Cancer-related genes:Mutational cancer driver genes; Predicted intracellular proteins; Transcription factors:Other all-alpha-helical DNA-binding domains	Nucleoplasm (Approved)				0	0	0	0	0	0	0	0	0	0	0	0	0	0	0	0	0	0	0	0
HMMR	3161	symbol	H. sapiens	3161	H. sapiens	HMMR	hyaluronan mediated motility receptor			FDA approved drug targets:Small molecule drugs; CD markers; Predicted intracellular proteins	Microtubules (Enhanced); Additional: Centrosome;Cytosol	Hyaluronic acid		(M5901)HALLMARK G2M CHECKPOINT; (M5925)HALLMARK E2F TARGETS; (M5937)HALLMARK GLYCOLYSIS	1	0	0	0	0	0	0	0	0	0	0	0	0	1	0	0	0	0	0	0
HNRNPA2B1	3181	symbol	H. sapiens	3181	H. sapiens	HNRNPA2B1	heterogeneous nuclear ribonucleoprotein A2/B1	GO:1905663 positive regulation of telomerase RNA reverse transcriptase activity;GO:1905661 regulation of telomerase RNA reverse transcriptase activity;GO:1990428 miRNA transport		Predicted intracellular proteins; Disease related genes; Cancer-related genes	Nucleoplasm (Enhanced)	Copper; Artenimol		(M5926)HALLMARK MYC TARGETS V1	0	1	1	0	1	0	0	0	0	0	0	0	0	0	0	0	0	0	0	0
HNRNPA3	220988	symbol	H. sapiens	220988	H. sapiens	HNRNPA3	heterogeneous nuclear ribonucleoprotein A3	GO:0051028 mRNA transport;GO:0050657 nucleic acid transport;GO:0050658 RNA transport		Predicted intracellular proteins	Nucleoplasm (Enhanced)			(M5926)HALLMARK MYC TARGETS V1	0	0	0	0	1	0	0	0	0	0	0	0	0	0	0	0	0	0	0	0
HNRNPDL	9987	symbol	H. sapiens	9987	H. sapiens	HNRNPDL	heterogeneous nuclear ribonucleoprotein D like	GO:0010468 regulation of gene expression;GO:0060255 regulation of macromolecule metabolic process;GO:0010467 gene expression		Predicted intracellular proteins; Disease related genes	Nucleoplasm (Enhanced)				0	0	0	0	0	0	0	0	0	0	0	0	0	0	0	0	0	0	0	0
HNRNPH3	3189	symbol	H. sapiens	3189	H. sapiens	HNRNPH3	heterogeneous nuclear ribonucleoprotein H3	GO:0043484 regulation of RNA splicing;GO:0000377 RNA splicing, via transesterification reactions with bulged adenosine as nucleophile;GO:0000398 mRNA splicing, via spliceosome		Predicted intracellular proteins	Nucleoplasm (Supported)	Copper			0	0	0	0	1	0	0	0	0	0	0	0	0	0	0	0	0	0	0	0
HNRNPR	10236	symbol	H. sapiens	10236	H. sapiens	HNRNPR	heterogeneous nuclear ribonucleoprotein R	GO:0061157 mRNA destabilization;GO:0061014 positive regulation of mRNA catabolic process;GO:0050779 RNA destabilization		Predicted intracellular proteins	Nucleoplasm (Enhanced)			(M5926)HALLMARK MYC TARGETS V1	0	0	0	0	1	0	0	0	0	0	0	0	0	0	0	0	0	0	0	0
HNRNPU-AS1	3192	gene_synonym	H. sapiens	3192	H. sapiens	HNRNPU	heterogeneous nuclear ribonucleoprotein U	GO:1902889 protein localization to spindle microtubule;GO:1990280 RNA localization to chromatin;GO:0098961 dendritic transport of ribonucleoprotein complex		Predicted intracellular proteins; Disease related genes	Nucleoplasm (Enhanced)			(M5941)HALLMARK UV RESPONSE UP; (M5901)HALLMARK G2M CHECKPOINT; (M5926)HALLMARK MYC TARGETS V1	0	1	0	1	1	0	0	0	1	1	0	0	0	0	0	0	0	0	0	0
HNRNPUL2	221092	symbol	H. sapiens	221092	H. sapiens	HNRNPUL2	heterogeneous nuclear ribonucleoprotein U like 2	GO:0008150 biological_process		Predicted intracellular proteins	Nucleoplasm (Enhanced)				0	0	0	0	0	0	0	0	0	0	0	0	0	0	0	0	0	0	0	0
HOXD11	3237	symbol	H. sapiens	3237	H. sapiens	HOXD11	homeobox D11	GO:0001658 branching involved in ureteric bud morphogenesis;GO:0060675 ureteric bud morphogenesis;GO:0072171 mesonephric tubule morphogenesis		Predicted intracellular proteins; Transcription factors:Helix-turn-helix domains; Cancer-related genes	Nucleoplasm (Supported)			(M5953)HALLMARK KRAS SIGNALING UP	0	0	0	0	0	0	0	0	0	0	0	0	0	0	0	0	0	0	0	0
HP1BP3	50809	symbol	H. sapiens	50809	H. sapiens	HP1BP3	heterochromatin protein 1 binding protein 3	GO:0097298 regulation of nucleus size;GO:0070828 heterochromatin organization;GO:0006334 nucleosome assembly		Predicted intracellular proteins	Nuclear speckles (Supported)	Artenimol			0	0	1	0	0	0	0	0	0	0	0	0	0	0	0	0	0	1	0	0
HPS4	89781	symbol	H. sapiens	89781	H. sapiens	HPS4	HPS4 biogenesis of lysosomal organelles complex 3 subunit 2	GO:0048075 positive regulation of eye pigmentation;GO:0048073 regulation of eye pigmentation;GO:1903232 melanosome assembly		Predicted intracellular proteins; Disease related genes	Centrosome (Approved)				0	0	0	0	0	0	0	0	0	0	0	0	0	0	0	0	0	0	0	0
HSF2	3298	symbol	H. sapiens	3298	H. sapiens	HSF2	heat shock transcription factor 2	GO:0007283 spermatogenesis;GO:0048232 male gamete generation;GO:0007276 gamete generation		Predicted intracellular proteins; Transcription factors:Helix-turn-helix domains	Nucleoplasm (Supported)		(M200)PID ERA GENOMIC PATHWAY		0	0	0	0	0	0	0	0	0	0	0	0	0	0	0	0	0	0	0	0
HSP90B1	7184	symbol	H. sapiens	7184	H. sapiens	HSP90B1	heat shock protein 90 beta family member 1	GO:0031247 actin rod assembly;GO:0034975 protein folding in endoplasmic reticulum;GO:0071318 cellular response to ATP		Predicted intracellular proteins; Cancer-related genes:Candidate cancer biomarkers	Endoplasmic reticulum (Enhanced)	Rifabutin; 2-Chlorodideoxyadenosine; Geldanamycin; Diglyme; N-Ethyl-5'-Carboxamido Adenosine; Radicicol; METHYL 3-CHLORO-2-{3-[(2,5-DIHYDROXY-4-METHOXYPHENYL)AMINO]-3-OXOPROPYL}-4,6-DIHYDROXYBENZOATE; 2-(3-AMINO-2,5,6-TRIMETHOXYPHENYL)ETHYL 5-CHLORO-2,4-DIHYDROXYBENZOATE; Copper	(M183)PID IL6 7 PATHWAY	(M5923)HALLMARK PI3K AKT MTOR SIGNALING; (M5922)HALLMARK UNFOLDED PROTEIN RESPONSE; (M5924)HALLMARK MTORC1 SIGNALING	0	0	0	0	0	0	0	0	0	0	0	0	0	0	0	0	0	0	0	1
HSPB11	51668	symbol	H. sapiens	51668	H. sapiens	HSPB11	heat shock protein family B (small) member 11	GO:0070986 left/right axis specification;GO:0060972 left/right pattern formation;GO:0042073 intraciliary transport		Predicted intracellular proteins	Nucleoplasm (Approved); Additional: Cytosol				0	0	0	0	0	0	0	0	0	0	0	0	0	1	0	0	0	0	0	0
HTATSF1	27336	symbol	H. sapiens	27336	H. sapiens	HTATSF1	HIV-1 Tat specific factor 1	GO:0032784 regulation of DNA-templated transcription, elongation;GO:0006354 DNA-templated transcription, elongation;GO:0019079 viral genome replication		Predicted intracellular proteins	Nucleoplasm (Enhanced)				0	0	0	0	1	0	0	0	0	0	0	0	0	0	0	0	0	0	0	0
HTRA1	5654	symbol	H. sapiens	5654	H. sapiens	HTRA1	HtrA serine peptidase 1	GO:0060718 chorionic trophoblast cell differentiation;GO:0097187 dentinogenesis;GO:0060717 chorion development		Disease related genes; Peptidases:Serine-type peptidases; Predicted intracellular proteins; Potential drug targets; Predicted secreted proteins; Enzymes	Plasma membrane (Supported)		(M3468)NABA ECM REGULATORS; (M5885)NABA MATRISOME ASSOCIATED; (M5889)NABA MATRISOME	(M5946)HALLMARK COAGULATION; (M5930)HALLMARK EPITHELIAL MESENCHYMAL TRANSITION	0	0	0	0	0	0	0	0	0	0	0	0	0	0	0	0	0	0	0	0
HYLS1	219844	symbol	H. sapiens	219844	H. sapiens	HYLS1	HYLS1 centriolar and ciliogenesis associated	GO:0060271 cilium assembly;GO:0044782 cilium organization;GO:0120031 plasma membrane bounded cell projection assembly		Predicted intracellular proteins; Disease related genes	Cytosol;Plasma membrane (Supported)				0	0	0	0	0	0	0	0	0	0	0	0	0	0	0	0	0	0	0	0
ICE2	79664	symbol	H. sapiens	79664	H. sapiens	ICE2	interactor of little elongation complex ELL subunit 2	GO:0042796 snRNA transcription by RNA polymerase III;GO:0045945 positive regulation of transcription by RNA polymerase III;GO:0042795 snRNA transcription by RNA polymerase II		Predicted intracellular proteins	Nuclear bodies;Nucleoplasm (Supported)				0	0	0	0	0	0	0	0	0	0	0	0	0	0	0	0	0	0	0	0
IFT80	57560	symbol	H. sapiens	57560	H. sapiens	IFT80	intraflagellar transport 80	GO:0061975 articular cartilage development;GO:0097500 receptor localization to non-motile cilium;GO:2000051 negative regulation of non-canonical Wnt signaling pathway		Predicted intracellular proteins; Disease related genes					0	0	0	0	0	0	0	0	0	0	0	0	0	1	0	0	0	0	0	0
IFT81	28981	symbol	H. sapiens	28981	H. sapiens	IFT81	intraflagellar transport 81	GO:0035735 intraciliary transport involved in cilium assembly;GO:0042073 intraciliary transport;GO:0008589 regulation of smoothened signaling pathway		Predicted intracellular proteins	Centrosome;Cytosol (Approved)				0	0	0	0	0	0	0	0	0	0	0	0	0	1	0	0	0	0	0	0
IKZF4	64375	symbol	H. sapiens	64375	H. sapiens	IKZF4	IKAROS family zinc finger 4	GO:0051260 protein homooligomerization;GO:0051259 protein complex oligomerization;GO:0045892 negative regulation of transcription, DNA-templated		Transcription factors:Zinc-coordinating DNA-binding domains; Predicted intracellular proteins	Nuclear bodies;Nucleoplasm (Supported)			(M5947)HALLMARK IL2 STAT5 SIGNALING	0	0	0	0	0	0	0	0	0	0	0	0	0	0	0	0	0	0	0	0
IL13RA1	3597	symbol	H. sapiens	3597	H. sapiens	IL13RA1	interleukin 13 receptor subunit alpha 1	GO:0038165 oncostatin-M-mediated signaling pathway;GO:0048861 leukemia inhibitory factor signaling pathway;GO:0019221 cytokine-mediated signaling pathway		CD markers; Predicted intracellular proteins	Vesicles (Approved); Additional: Nucleoplasm		(M28)PID IL4 2PATHWAY	(M5897)HALLMARK IL6 JAK STAT3 SIGNALING; (M5937)HALLMARK GLYCOLYSIS	0	0	0	0	0	0	0	0	0	0	0	0	0	0	0	0	0	0	0	0
IL17RB	55540	symbol	H. sapiens	55540	H. sapiens	IL17RB	interleukin 17 receptor B	GO:0001558 regulation of cell growth;GO:0019221 cytokine-mediated signaling pathway;GO:0016049 cell growth			Nucleoplasm;Plasma membrane (Approved); Additional: Centriolar satellite;Mitotic spindle			(M5897)HALLMARK IL6 JAK STAT3 SIGNALING; (M5906)HALLMARK ESTROGEN RESPONSE EARLY; (M5907)HALLMARK ESTROGEN RESPONSE LATE	0	0	0	0	0	0	0	0	0	0	0	0	0	0	0	0	0	0	0	0
IL21-AS1	100996941	symbol	H. sapiens	100996941	H. sapiens	IL21-AS1	IL21 antisense RNA 1								0	0	0	0	0	0	0	0	0	0	0	0	0	0	0	0	0	0	0	0
IL22RA1	58985	symbol	H. sapiens	58985	H. sapiens	IL22RA1	interleukin 22 receptor subunit alpha 1	GO:0050829 defense response to Gram-negative bacterium;GO:0042742 defense response to bacterium;GO:0019221 cytokine-mediated signaling pathway							0	0	0	0	0	0	0	0	0	0	0	0	0	0	0	0	0	0	0	0
ILF2	3608	symbol	H. sapiens	3608	H. sapiens	ILF2	interleukin enhancer binding factor 2	GO:0045893 positive regulation of transcription, DNA-templated;GO:1903508 positive regulation of nucleic acid-templated transcription;GO:1902680 positive regulation of RNA biosynthetic process		Predicted intracellular proteins	Nucleoplasm (Supported)			(M5926)HALLMARK MYC TARGETS V1	0	0	0	0	0	0	0	0	0	0	0	0	0	0	0	0	0	0	0	0
ING2	3622	symbol	H. sapiens	3622	H. sapiens	ING2	inhibitor of growth family member 2	GO:0042078 germ-line stem cell division;GO:0048133 male germ-line stem cell asymmetric division;GO:0098722 asymmetric stem cell division		Predicted intracellular proteins	Nucleoplasm (Supported)				0	1	1	0	0	0	1	0	0	0	0	0	1	0	0	0	0	0	0	0
INPP5F	22876	symbol	H. sapiens	22876	H. sapiens	INPP5F	inositol polyphosphate-5-phosphatase F	GO:0031161 phosphatidylinositol catabolic process;GO:0001921 positive regulation of receptor recycling;GO:0048681 negative regulation of axon regeneration		Predicted intracellular proteins; Enzymes; ENZYME proteins:Hydrolases	Vesicles (Supported)			(M5906)HALLMARK ESTROGEN RESPONSE EARLY	0	1	0	0	0	0	0	0	0	0	0	0	0	0	0	0	0	0	0	0
INSIG2	51141	symbol	H. sapiens	51141	H. sapiens	INSIG2	insulin induced gene 2	GO:0036316 SREBP-SCAP complex retention in endoplasmic reticulum;GO:2000639 negative regulation of SREBP signaling pathway;GO:2000638 regulation of SREBP signaling pathway							0	0	0	0	0	0	0	0	0	0	0	0	0	0	0	0	0	0	0	0
INTS12	57117	symbol	H. sapiens	57117	H. sapiens	INTS12	integrator complex subunit 12	GO:0034472 snRNA 3'-end processing;GO:0016180 snRNA processing;GO:0016073 snRNA metabolic process		Cancer-related genes:Mutated cancer genes; Predicted intracellular proteins	Cytosol;Nucleoplasm (Approved); Additional: Nuclear bodies;Plasma membrane				0	0	0	0	0	0	0	0	0	0	0	0	0	0	0	0	0	0	0	0
IPO11	51194	symbol	H. sapiens	51194	H. sapiens	IPO11	importin 11	GO:0006610 ribosomal protein import into nucleus;GO:0006606 protein import into nucleus;GO:0051170 import into nucleus		Predicted intracellular proteins; Transporters:Transporter channels and pores	Nucleoplasm (Supported); Additional: Cytosol				0	0	0	0	0	0	0	0	0	0	0	0	0	0	0	0	0	0	0	0
IPO8	10526	symbol	H. sapiens	10526	H. sapiens	IPO8	importin 8	GO:0006606 protein import into nucleus;GO:0051170 import into nucleus;GO:0017038 protein import		Predicted intracellular proteins; Transporters:Transporter channels and pores	Nucleoplasm (Approved)				0	0	0	0	0	0	0	0	0	0	0	0	0	0	0	0	0	0	0	0
IPO9	55705	symbol	H. sapiens	55705	H. sapiens	IPO9	importin 9	GO:0006606 protein import into nucleus;GO:0051170 import into nucleus;GO:0017038 protein import		Predicted intracellular proteins; Transporters:Transporter channels and pores	Cytosol (Approved); Additional: Vesicles				0	0	0	0	0	0	0	0	0	0	0	0	0	0	0	0	0	0	0	0
IPW	3653	symbol	H. sapiens	3653	H. sapiens	IPW	imprinted in Prader-Willi syndrome								0	0	0	0	0	0	0	0	0	0	0	0	0	0	0	0	0	0	0	0
IRAK3	11213	symbol	H. sapiens	11213	H. sapiens	IRAK3	interleukin 1 receptor associated kinase 3	GO:0010931 macrophage tolerance induction;GO:0010932 regulation of macrophage tolerance induction;GO:0010933 positive regulation of macrophage tolerance induction	TKL Ser/Thr protein kinase family	Disease related genes; ENZYME proteins:Transferases; Predicted intracellular proteins; Potential drug targets; Kinases:TKL Ser/Thr protein kinases; Enzymes	Vesicles (Approved)	Fostamatinib	(M110)PID IL1 PATHWAY		0	1	0	0	0	0	0	0	0	0	0	0	0	0	0	0	0	0	0	0
IREB2	3658	symbol	H. sapiens	3658	H. sapiens	IREB2	iron responsive element binding protein 2	GO:0006101 citrate metabolic process;GO:0006782 protoporphyrinogen IX biosynthetic process;GO:0046501 protoporphyrinogen IX metabolic process		Predicted intracellular proteins	Cell Junctions (Approved); Additional: Cytosol		(M66)PID MYC ACTIV PATHWAY		0	0	0	0	0	0	0	0	0	0	0	0	0	0	0	0	0	0	0	0
ITFG2	55846	symbol	H. sapiens	55846	H. sapiens	ITFG2	integrin alpha FG-GAP repeat containing 2	GO:0002314 germinal center B cell differentiation;GO:1904262 negative regulation of TORC1 signaling;GO:0002313 mature B cell differentiation involved in immune response		Predicted intracellular proteins	Endoplasmic reticulum;Nucleoplasm (Approved); Additional: Cytokinetic bridge				0	0	0	0	0	0	0	0	0	0	0	0	0	0	0	0	0	0	0	0
ITGAE	3682	symbol	H. sapiens	3682	H. sapiens	ITGAE	integrin subunit alpha E	GO:0007229 integrin-mediated signaling pathway;GO:0007155 cell adhesion;GO:0022610 biological adhesion		CD markers; Predicted intracellular proteins			(M47)PID INTEGRIN CS PATHWAY; (M156)PID ECADHERIN NASCENT AJ PATHWAY	(M5947)HALLMARK IL2 STAT5 SIGNALING	0	0	0	0	0	0	0	0	0	0	0	0	0	0	0	0	0	0	0	0
ITGB1BP1	9270	symbol	H. sapiens	9270	H. sapiens	ITGB1BP1	integrin subunit beta 1 binding protein 1	GO:0006933 negative regulation of cell adhesion involved in substrate-bound cell migration;GO:0090315 negative regulation of protein targeting to membrane;GO:0010764 negative regulation of fibroblast migration		Predicted intracellular proteins	Nucleoplasm (Supported); Additional: Cytosol;Nuclear bodies			(M5949)HALLMARK PEROXISOME	0	1	0	0	0	0	0	0	0	0	0	0	0	0	0	0	0	0	0	0
ITGB3BP	23421	symbol	H. sapiens	23421	H. sapiens	ITGB3BP	integrin subunit beta 3 binding protein	GO:0034080 CENP-A containing nucleosome assembly;GO:0061641 CENP-A containing chromatin organization;GO:0031055 chromatin remodeling at centromere		Predicted intracellular proteins	Nucleoplasm (Supported)				1	1	1	0	0	0	0	0	0	0	0	0	0	0	0	0	0	1	1	0
IWS1	55677	symbol	H. sapiens	55677	H. sapiens	IWS1	interacts with SUPT6H, CTD assembly factor 1	GO:2001253 regulation of histone H3-K36 trimethylation;GO:0010793 regulation of mRNA export from nucleus;GO:0097198 histone H3-K36 trimethylation		Predicted intracellular proteins	Nucleoplasm (Enhanced)				0	0	0	0	1	0	0	0	0	0	0	0	1	0	0	0	0	0	0	0
JADE3	9767	symbol	H. sapiens	9767	H. sapiens	JADE3	jade family PHD finger 3	GO:0043983 histone H4-K12 acetylation;GO:0043981 histone H4-K5 acetylation;GO:0043982 histone H4-K8 acetylation		Predicted intracellular proteins	Nucleoli;Nucleoplasm (Approved)				0	0	0	0	0	0	0	0	0	0	0	0	1	0	0	0	0	0	0	0
JAM2	58494	symbol	H. sapiens	58494	H. sapiens	JAM2	junctional adhesion molecule 2	GO:0097241 hematopoietic stem cell migration to bone marrow;GO:0071593 lymphocyte aggregation;GO:0035701 hematopoietic stem cell migration		CD markers	Plasma membrane (Supported); Additional: Nucleoplasm		(M277)PID INTEGRIN A4B1 PATHWAY; (M159)PID AMB2 NEUTROPHILS PATHWAY; (M18)PID INTEGRIN1 PATHWAY		0	0	0	0	0	0	0	0	0	0	0	0	0	0	0	0	0	0	0	0
JMJD1C	221037	symbol	H. sapiens	221037	H. sapiens	JMJD1C	jumonji domain containing 1C	GO:0033169 histone H3-K9 demethylation;GO:0070076 histone lysine demethylation;GO:0016577 histone demethylation		Predicted intracellular proteins	Nucleoplasm (Supported); Additional: Cytosol				0	0	0	0	0	0	0	0	0	0	0	0	1	0	0	0	0	0	0	0
JRKL	8690	symbol	H. sapiens	8690	H. sapiens	JRKL	JRK like	GO:0007417 central nervous system development;GO:0007399 nervous system development;GO:0048731 system development		Predicted intracellular proteins	Nucleoplasm (Approved); Additional: Cytokinetic bridge				0	0	0	0	0	0	0	0	0	0	0	0	0	0	0	0	0	0	0	0
KANK4	163782	symbol	H. sapiens	163782	H. sapiens	KANK4	KN motif and ankyrin repeat domains 4	GO:0030837 negative regulation of actin filament polymerization;GO:0032272 negative regulation of protein polymerization;GO:0031333 negative regulation of protein-containing complex assembly		Predicted intracellular proteins	Cytosol (Uncertain); Additional: Microtubules				0	1	0	0	0	0	0	0	0	0	0	0	0	0	0	0	0	0	0	0
KANSL1L	151050	symbol	H. sapiens	151050	H. sapiens	KANSL1L	KAT8 regulatory NSL complex subunit 1 like			Predicted intracellular proteins	Cytosol (Approved)				0	0	0	0	0	0	0	0	0	0	0	0	0	0	0	0	0	0	0	0
KAT6B	23522	symbol	H. sapiens	23522	H. sapiens	KAT6B	lysine acetyltransferase 6B	GO:0043966 histone H3 acetylation;GO:0006334 nucleosome assembly;GO:0031497 chromatin assembly		Disease related genes; ENZYME proteins:Transferases; Transcription factors:Zinc-coordinating DNA-binding domains; Predicted intracellular proteins; Potential drug targets; Enzymes; Cancer-related genes	Nuclear bodies;Nucleoplasm (Approved)				0	0	1	0	0	0	0	0	0	0	0	0	1	0	0	0	0	1	0	0
KATNA1	11104	symbol	H. sapiens	11104	H. sapiens	KATNA1	katanin catalytic subunit A1	GO:0051013 microtubule severing;GO:0051301 cell division;GO:0000226 microtubule cytoskeleton organization		Predicted intracellular proteins; Enzymes; ENZYME proteins:Hydrolases	Centriolar satellite (Supported); Additional: Nucleoplasm		(M163)PID LIS1 PATHWAY	(M5893)HALLMARK MITOTIC SPINDLE; (M5901)HALLMARK G2M CHECKPOINT	0	1	0	1	0	0	0	0	0	0	0	0	0	0	0	0	0	0	0	0
KBTBD2	25948	symbol	H. sapiens	25948	H. sapiens	KBTBD2	kelch repeat and BTB domain containing 2	GO:0014065 phosphatidylinositol 3-kinase signaling;GO:0048015 phosphatidylinositol-mediated signaling;GO:0048017 inositol lipid-mediated signaling		Predicted intracellular proteins	Nucleoli fibrillar center;Nucleoplasm (Approved)				0	0	0	0	0	0	0	0	0	0	0	0	0	0	0	0	0	0	0	0
KCNJ15	3772	symbol	H. sapiens	3772	H. sapiens	KCNJ15	potassium inwardly rectifying channel subfamily J member 15	GO:1990573 potassium ion import across plasma membrane;GO:0098659 inorganic cation import across plasma membrane;GO:0099587 inorganic ion import across plasma membrane		Predicted intracellular proteins; Voltage-gated ion channels:Inwardly Rectifying Potassium Channels	Plasma membrane (Approved); Additional: Cytosol;Vesicles		(M118)PID INTEGRIN A9B1 PATHWAY		0	0	0	0	0	0	0	0	0	0	0	0	0	0	0	0	0	0	0	0
KCNS1	3787	symbol	H. sapiens	3787	H. sapiens	KCNS1	potassium voltage-gated channel modifier subfamily S member 1	GO:1902259 regulation of delayed rectifier potassium channel activity;GO:1901016 regulation of potassium ion transmembrane transporter activity;GO:1901379 regulation of potassium ion transmembrane transport		Transporters:Transporter channels and pores; Voltage-gated ion channels:Voltage-Gated Potassium Channels					0	0	0	0	0	0	0	0	0	0	0	0	0	0	0	0	0	0	0	0
KCTD3	51133	symbol	H. sapiens	51133	H. sapiens	KCTD3	potassium channel tetramerization domain containing 3	GO:0051260 protein homooligomerization;GO:0051259 protein complex oligomerization;GO:0065003 protein-containing complex assembly		Predicted intracellular proteins	Cytosol (Approved)				1	0	0	0	0	0	0	0	0	0	0	0	0	0	0	0	0	0	0	0
KDELC2	143888	gene_synonym	H. sapiens	143888	H. sapiens	POGLUT3	protein O-glucosyltransferase 3	GO:0018242 protein O-linked glycosylation via serine;GO:0006493 protein O-linked glycosylation;GO:0006486 protein glycosylation		Predicted intracellular proteins	Nucleoplasm (Approved); Additional: Vesicles				0	0	0	0	0	0	0	0	0	0	0	0	0	0	0	0	0	0	0	0
KDM2A	22992	symbol	H. sapiens	22992	H. sapiens	KDM2A	lysine demethylase 2A	GO:0010944 negative regulation of transcription by competitive promoter binding;GO:0070544 histone H3-K36 demethylation;GO:0070076 histone lysine demethylation		ENZYME proteins:Oxidoreductases; Transcription factors:Zinc-coordinating DNA-binding domains; Predicted intracellular proteins; Enzymes	Nucleoplasm (Supported)				0	0	1	0	0	0	0	0	0	0	0	0	1	0	0	0	0	0	0	0
KDM3A	55818	symbol	H. sapiens	55818	H. sapiens	KDM3A	lysine demethylase 3A	GO:0046293 formaldehyde biosynthetic process;GO:0046292 formaldehyde metabolic process;GO:0007290 spermatid nucleus elongation		Predicted intracellular proteins	Nucleoplasm (Enhanced)		(M58)PID AR PATHWAY	(M5891)HALLMARK HYPOXIA	0	0	0	0	0	0	0	0	0	0	0	0	1	0	0	0	0	0	0	0
KIAA0196	9897	gene_synonym	H. sapiens	9897	H. sapiens	WASHC5	WASH complex subunit 5	GO:0140285 endosome fission;GO:0040038 polar body extrusion after meiotic divisions;GO:0033206 meiotic cytokinesis		Predicted intracellular proteins; Disease related genes	Nucleoplasm (Enhanced)				0	1	0	1	0	0	1	0	0	0	0	0	0	0	0	0	0	0	0	0
KIAA0391	9692	gene_synonym	H. sapiens	9692	H. sapiens	PRORP	protein only RNase P catalytic subunit	GO:0097745 mitochondrial tRNA 5'-end processing;GO:0000964 mitochondrial RNA 5'-end processing;GO:0090646 mitochondrial tRNA processing		Predicted intracellular proteins; Enzymes; ENZYME proteins:Hydrolases	Mitochondria (Supported); Additional: Nucleoplasm				0	0	0	0	1	0	0	0	0	0	0	0	0	0	0	0	0	0	0	0
KIAA0430	9665	gene_synonym	H. sapiens	9665	H. sapiens	MARF1	meiosis regulator and mRNA stability factor 1	GO:0007143 female meiotic nuclear division;GO:0048477 oogenesis;GO:0007292 female gamete generation		Predicted intracellular proteins	Golgi apparatus;Vesicles (Approved)				0	1	1	0	0	0	1	0	0	0	0	0	0	0	0	0	0	0	0	0
KIAA0586	9786	symbol	H. sapiens	9786	H. sapiens	KIAA0586	KIAA0586	GO:0007224 smoothened signaling pathway;GO:0060271 cilium assembly;GO:0044782 cilium organization		Predicted intracellular proteins; Disease related genes	Nucleoplasm (Approved); Additional: Cytosol				0	0	0	0	0	0	0	0	0	0	0	0	0	0	0	0	0	0	0	0
KIAA0753	9851	symbol	H. sapiens	9851	H. sapiens	KIAA0753	KIAA0753	GO:0071539 protein localization to centrosome;GO:1905508 protein localization to microtubule organizing center;GO:0007099 centriole replication		Predicted intracellular proteins; Disease related genes	Centrosome;Cytosol (Enhanced)				0	0	0	1	0	0	0	0	0	0	0	0	0	0	1	0	0	0	0	0
KIAA0907	22889	gene_synonym	H. sapiens	22889	H. sapiens	KHDC4	KH domain containing 4, pre-mRNA splicing factor	GO:0006376 mRNA splice site selection;GO:0000245 spliceosomal complex assembly;GO:0022618 ribonucleoprotein complex assembly		Predicted intracellular proteins	Nucleoplasm (Supported)				0	0	0	0	1	0	0	0	0	0	0	0	0	0	0	0	0	0	0	0
KIAA1407	57577	gene_synonym	H. sapiens	57577	H. sapiens	CCDC191	coiled-coil domain containing 191			Predicted intracellular proteins	Mitochondria (Approved)				0	0	0	0	0	0	0	0	0	0	0	0	0	0	0	0	0	0	0	0
KIAA1429	25962	gene_synonym	H. sapiens	25962	H. sapiens	VIRMA	vir like m6A methyltransferase associated	GO:0110104 mRNA alternative polyadenylation;GO:0080009 mRNA methylation;GO:1900363 regulation of mRNA polyadenylation		Predicted intracellular proteins	Nuclear bodies (Supported); Additional: Nucleoplasm				0	0	0	0	1	0	0	0	0	0	0	0	0	0	0	0	0	0	1	0
KIAA1524	57650	gene_synonym	H. sapiens	57650	H. sapiens	CIP2A	cellular inhibitor of PP2A			Predicted intracellular proteins	Cytosol (Supported); Additional: Plasma membrane				0	0	0	0	0	0	0	0	0	0	0	0	0	0	0	0	0	0	0	0
KIAA1841	84542	gene_synonym	H. sapiens	84542	H. sapiens	SANBR	SANT and BTB domain regulator of CSR			Predicted intracellular proteins	Nucleoli;Nucleoplasm (Approved)				0	0	0	0	0	0	0	0	0	0	0	0	0	0	0	0	0	0	0	0
KIF11	3832	symbol	H. sapiens	3832	H. sapiens	KIF11	kinesin family member 11	GO:0046602 regulation of mitotic centrosome separation;GO:0007100 mitotic centrosome separation;GO:0051299 centrosome separation		Predicted intracellular proteins; Disease related genes	Cytosol (Supported); Additional: Mitotic spindle	3-[(5s)-1-Acetyl-3-(2-Chlorophenyl)-4,5-Dihydro-1h-Pyrazol-5-Yl]Phenol; Monastrol; Filanesib; (4R)-4-(3-HYDROXYPHENYL)-N,N,7,8-TETRAMETHYL-3,4-DIHYDROISOQUINOLINE-2(1H)-CARBOXAMIDE; N,N-DIETHYL-2-[(2-THIENYLCARBONYL)AMINO]-4,5,6,7-TETRAHYDRO-1-BENZOTHIOPHENE-3-CARBOXAMIDE; (5R)-N,N-DIETHYL-5-METHYL-2-[(THIOPHEN-2-YLCARBONYL)AMINO]-4,5,6,7-TETRAHYDRO-1-BENZOTHIOPHENE-3-CARBOXAMIDE; MK-0731; [(4R)-…		(M5893)HALLMARK MITOTIC SPINDLE; (M5901)HALLMARK G2M CHECKPOINT	0	1	0	1	0	0	0	0	0	0	0	0	0	0	1	0	0	0	0	0
KIF14	9928	symbol	H. sapiens	9928	H. sapiens	KIF14	kinesin family member 14	GO:0021685 cerebellar granular layer structural organization;GO:0021698 cerebellar cortex structural organization;GO:0021693 cerebellar Purkinje cell layer structural organization		Predicted intracellular proteins; Disease related genes	Cytosol (Supported); Additional: Midbody ring				1	1	0	1	0	0	0	0	1	1	0	0	0	0	0	0	1	0	0	0
KIF15	56992	symbol	H. sapiens	56992	H. sapiens	KIF15	kinesin family member 15	GO:1901673 regulation of mitotic spindle assembly;GO:0090169 regulation of spindle assembly;GO:0060236 regulation of mitotic spindle organization		Predicted intracellular proteins				(M5893)HALLMARK MITOTIC SPINDLE; (M5901)HALLMARK G2M CHECKPOINT	0	1	0	1	0	0	0	0	0	0	0	0	0	0	0	0	0	0	0	0
KIF18A	81930	symbol	H. sapiens	81930	H. sapiens	KIF18A	kinesin family member 18A	GO:0072520 seminiferous tubule development;GO:0071392 cellular response to estradiol stimulus;GO:0007019 microtubule depolymerization		Predicted intracellular proteins	Cytokinetic bridge;Microtubules (Supported)				1	1	0	1	0	0	1	0	0	1	0	0	0	0	0	0	0	0	0	0
KIF18B	146909	symbol	H. sapiens	146909	H. sapiens	KIF18B	kinesin family member 18B	GO:0007019 microtubule depolymerization;GO:0051261 protein depolymerization;GO:0031109 microtubule polymerization or depolymerization		Predicted intracellular proteins	Microtubule ends;Nucleoplasm (Supported); Additional: Cytosol;Nuclear bodies			(M5925)HALLMARK E2F TARGETS	0	1	0	1	0	0	0	0	0	0	0	0	0	0	0	0	0	0	0	0
KIF20A	10112	symbol	H. sapiens	10112	H. sapiens	KIF20A	kinesin family member 20A	GO:0061952 midbody abscission;GO:1902410 mitotic cytokinetic process;GO:0032506 cytokinetic process		Predicted intracellular proteins	Cleavage furrow;Nucleoplasm (Enhanced); Additional: Cytokinetic bridge		(M14)PID AURORA B PATHWAY; (M129)PID PLK1 PATHWAY	(M5907)HALLMARK ESTROGEN RESPONSE LATE; (M5937)HALLMARK GLYCOLYSIS	1	1	0	1	0	0	0	0	0	0	1	0	0	0	0	0	0	1	0	1
KIF20B	9585	symbol	H. sapiens	9585	H. sapiens	KIF20B	kinesin family member 20B	GO:1903436 regulation of mitotic cytokinetic process;GO:1903438 positive regulation of mitotic cytokinetic process;GO:0032954 regulation of cytokinetic process		Predicted intracellular proteins	Cytokinetic bridge;Nucleoplasm (Supported); Additional: Cytosol;Midbody			(M5893)HALLMARK MITOTIC SPINDLE; (M5901)HALLMARK G2M CHECKPOINT	0	1	0	0	0	0	0	0	1	0	0	0	0	0	0	0	0	0	0	0
KIF22	3835	symbol	H. sapiens	3835	H. sapiens	KIF22	kinesin family member 22	GO:0007080 mitotic metaphase plate congression;GO:0007062 sister chromatid cohesion;GO:0051310 metaphase plate congression		Predicted intracellular proteins; Disease related genes	Nuclear speckles (Supported)			(M5893)HALLMARK MITOTIC SPINDLE; (M5901)HALLMARK G2M CHECKPOINT; (M5925)HALLMARK E2F TARGETS	0	1	1	0	0	0	0	0	0	1	0	1	0	0	0	0	0	0	0	1
KIF23	9493	symbol	H. sapiens	9493	H. sapiens	KIF23	kinesin family member 23	GO:0051256 mitotic spindle midzone assembly;GO:0000022 mitotic spindle elongation;GO:0051231 spindle elongation		Predicted intracellular proteins	Nucleoplasm (Enhanced); Additional: Midbody ring;Mitotic spindle		(M14)PID AURORA B PATHWAY	(M5893)HALLMARK MITOTIC SPINDLE; (M5901)HALLMARK G2M CHECKPOINT	1	1	0	1	0	0	0	0	1	0	0	0	0	0	0	0	0	1	1	1
KIF24	347240	symbol	H. sapiens	347240	H. sapiens	KIF24	kinesin family member 24	GO:0007019 microtubule depolymerization;GO:0051261 protein depolymerization;GO:0031109 microtubule polymerization or depolymerization		Predicted intracellular proteins					0	0	0	1	0	0	0	0	0	0	0	0	0	1	0	0	0	0	0	0
KIF2C	11004	symbol	H. sapiens	11004	H. sapiens	KIF2C	kinesin family member 2C	GO:0030951 establishment or maintenance of microtubule cytoskeleton polarity;GO:0030952 establishment or maintenance of cytoskeleton polarity;GO:0051315 attachment of mitotic spindle microtubules to kinetochore		Predicted intracellular proteins; Cancer-related genes:Candidate cancer biomarkers	Centrosome;Nucleoplasm (Supported); Additional: Midbody	Phosphoaminophosphonic Acid-Adenylate Ester	(M14)PID AURORA B PATHWAY	(M5951)HALLMARK SPERMATOGENESIS; (M5893)HALLMARK MITOTIC SPINDLE; (M5901)HALLMARK G2M CHECKPOINT	1	1	0	1	0	0	0	0	0	1	0	0	0	0	0	0	0	1	0	0
KIF4A	24137	symbol	H. sapiens	24137	H. sapiens	KIF4A	kinesin family member 4A	GO:0051256 mitotic spindle midzone assembly;GO:0000022 mitotic spindle elongation;GO:0051231 spindle elongation		Predicted intracellular proteins	Midbody;Nucleoplasm (Supported)			(M5893)HALLMARK MITOTIC SPINDLE; (M5901)HALLMARK G2M CHECKPOINT; (M5925)HALLMARK E2F TARGETS	0	1	0	1	0	0	0	1	0	0	0	0	0	0	0	0	0	1	0	0
KIFC1	3833	symbol	H. sapiens	3833	H. sapiens	KIFC1	kinesin family member C1	GO:0007080 mitotic metaphase plate congression;GO:0090307 mitotic spindle assembly;GO:0051310 metaphase plate congression		Predicted intracellular proteins	Centrosome (Approved)				0	1	0	1	0	0	0	0	0	1	0	0	0	0	0	0	0	0	0	0
KLF6	1316	symbol	H. sapiens	1316	H. sapiens	KLF6	Kruppel like factor 6	GO:0030183 B cell differentiation;GO:0042113 B cell activation;GO:0030098 lymphocyte differentiation		Transcription factors:Zinc-coordinating DNA-binding domains; Predicted intracellular proteins; Disease related genes; Cancer-related genes	Nucleoplasm (Supported); Additional: Cytosol;Nucleoli;Vesicles			(M5947)HALLMARK IL2 STAT5 SIGNALING; (M5890)HALLMARK TNFA SIGNALING VIA NFKB; (M5891)HALLMARK HYPOXIA	0	0	0	0	0	0	0	0	0	0	0	0	0	0	0	0	0	0	0	0
KLRAP1	10748	gene_synonym	H. sapiens	10748	H. sapiens	KLRA1P	killer cell lectin like receptor A1, pseudogene								0	0	0	0	0	0	0	0	0	0	0	0	0	0	0	0	0	0	0	0
KNSTRN	90417	symbol	H. sapiens	90417	H. sapiens	KNSTRN	kinetochore localized astrin (SPAG5) binding protein	GO:0051988 regulation of attachment of spindle microtubules to kinetochore;GO:0008608 attachment of spindle microtubules to kinetochore;GO:0071364 cellular response to epidermal growth factor stimulus		Predicted intracellular proteins; Disease related genes	Centriolar satellite;Mitotic spindle (Enhanced); Additional: Plasma membrane				0	1	0	1	0	0	0	0	0	1	0	0	0	0	0	0	0	0	0	0
KNTC1	9735	symbol	H. sapiens	9735	H. sapiens	KNTC1	kinetochore associated 1	GO:1903394 protein localization to kinetochore involved in kinetochore assembly;GO:0007096 regulation of exit from mitosis;GO:0051382 kinetochore assembly		Predicted intracellular proteins	Cytosol (Supported); Additional: Plasma membrane			(M5893)HALLMARK MITOTIC SPINDLE	1	1	0	1	0	0	0	0	0	0	0	0	0	0	0	1	0	0	0	0
KPNA1	3836	symbol	H. sapiens	3836	H. sapiens	KPNA1	karyopherin subunit alpha 1	GO:0014901 satellite cell activation involved in skeletal muscle regeneration;GO:0014719 skeletal muscle satellite cell activation;GO:0099527 postsynapse to nucleus signaling pathway		Predicted intracellular proteins; Transporters:Transporter channels and pores	Nucleoplasm (Enhanced); Additional: Cytosol		(M249)PID PI3KCI AKT PATHWAY		0	0	1	0	0	0	0	1	0	0	0	0	0	0	0	0	0	0	0	0
KPNA2	3838	symbol	H. sapiens	3838	H. sapiens	KPNA2	karyopherin subunit alpha 2	GO:0075506 entry of viral genome into host nucleus through nuclear pore complex via importin;GO:0075732 viral penetration into host nucleus;GO:0099527 postsynapse to nucleus signaling pathway		Predicted intracellular proteins; Transporters:Transporter channels and pores	Nucleoplasm (Enhanced); Additional: Cytosol		(M228)PID SMAD2 3PATHWAY; (M91)PID TCPTP PATHWAY; (M113)PID NFAT 3PATHWAY	(M5901)HALLMARK G2M CHECKPOINT; (M5925)HALLMARK E2F TARGETS; (M5926)HALLMARK MYC TARGETS V1	0	0	1	0	0	0	0	0	0	0	0	0	0	0	0	0	0	0	0	0
KRCC1	51315	symbol	H. sapiens	51315	H. sapiens	KRCC1	lysine rich coiled-coil 1			Predicted intracellular proteins	Cytosol (Approved); Additional: Nucleoli				0	0	0	0	0	0	0	0	0	0	0	0	0	0	0	0	0	0	0	0
KRIT1	889	symbol	H. sapiens	889	H. sapiens	KRIT1	KRIT1 ankyrin repeat containing	GO:2000114 regulation of establishment of cell polarity;GO:0032878 regulation of establishment or maintenance of cell polarity;GO:0045454 cell redox homeostasis		Predicted intracellular proteins; Disease related genes	Vesicles (Uncertain)				0	0	0	0	0	0	0	0	0	0	0	0	0	0	0	0	0	0	0	0
KRR1	11103	symbol	H. sapiens	11103	H. sapiens	KRR1	KRR1 small subunit processome component homolog	GO:0006364 rRNA processing;GO:0016072 rRNA metabolic process;GO:0042254 ribosome biogenesis		Predicted intracellular proteins	Nucleoli;Nucleoli rim (Enhanced); Additional: Mitotic chromosome;Nucleoplasm				0	0	0	0	1	0	0	0	0	0	0	0	0	0	0	0	0	0	0	0
KRT81	3887	symbol	H. sapiens	3887	H. sapiens	KRT81	keratin 81			Predicted intracellular proteins; Disease related genes					0	0	0	0	0	0	0	0	0	0	0	0	0	0	0	0	0	0	0	0
LANCL1	10314	symbol	H. sapiens	10314	H. sapiens	LANCL1	LanC like 1	GO:1903203 regulation of oxidative stress-induced neuron death;GO:0036475 neuron death in response to oxidative stress;GO:1903201 regulation of oxidative stress-induced cell death		Predicted intracellular proteins	Microtubules (Uncertain)				0	0	0	0	0	0	0	0	0	0	0	0	0	0	0	0	0	0	0	0
LARP7	51574	symbol	H. sapiens	51574	H. sapiens	LARP7	La ribonucleoprotein 7, transcriptional regulator	GO:0106349 snRNA methylation;GO:1990437 snRNA 2'-O-methylation;GO:1990438 U6 2'-O-snRNA methylation		Predicted intracellular proteins; Disease related genes	Cytosol;Nucleoplasm (Supported)				0	0	0	0	1	0	0	0	0	0	0	0	0	0	0	0	0	0	0	0
LBR	3930	symbol	H. sapiens	3930	H. sapiens	LBR	lamin B receptor	GO:0030223 neutrophil differentiation;GO:0030851 granulocyte differentiation;GO:0006695 cholesterol biosynthetic process		Predicted intracellular proteins; Disease related genes	Nuclear membrane (Enhanced)			(M5901)HALLMARK G2M CHECKPOINT; (M5925)HALLMARK E2F TARGETS	1	0	0	0	0	0	0	0	0	0	0	0	0	0	0	0	0	0	0	0
LDHA	3939	symbol	H. sapiens	3939	H. sapiens	LDHA	lactate dehydrogenase A	GO:0006089 lactate metabolic process;GO:0048569 post-embryonic animal organ development;GO:0019674 NAD metabolic process		Disease related genes; Predicted intracellular proteins; ENZYME proteins:Oxidoreductases; Cancer-related genes:Candidate cancer biomarkers; FDA approved drug targets:Small molecule drugs; Enzymes	Cytosol (Supported); Additional: Vesicles	NADH; Etheno-NAD; Nicotinamide; Oxamic Acid; Stiripentol; Copper; Artenimol	(M255)PID HIF1 TFPATHWAY; (M66)PID MYC ACTIV PATHWAY	(M5935)HALLMARK FATTY ACID METABOLISM; (M5891)HALLMARK HYPOXIA; (M5924)HALLMARK MTORC1 SIGNALING	0	0	0	0	0	0	0	0	0	0	0	0	0	0	0	0	0	0	0	0
LGALS8	3964	symbol	H. sapiens	3964	H. sapiens	LGALS8	galectin 8	GO:1904977 lymphatic endothelial cell migration;GO:0098792 xenophagy;GO:0036303 lymph vessel morphogenesis		Predicted intracellular proteins	Plasma membrane (Approved)		(M5880)NABA ECM AFFILIATED; (M5885)NABA MATRISOME ASSOCIATED; (M5889)NABA MATRISOME		0	0	0	0	0	0	0	0	0	0	0	0	0	0	0	0	0	0	0	0
LIN9	286826	symbol	H. sapiens	286826	H. sapiens	LIN9	lin-9 DREAM MuvB core complex component	GO:0071897 DNA biosynthetic process;GO:0006259 DNA metabolic process;GO:0051726 regulation of cell cycle		Predicted intracellular proteins	Nucleoplasm (Supported)				1	0	0	0	0	0	0	1	0	0	0	0	0	1	0	0	0	0	0	0
LINC00342	150759	symbol	H. sapiens	150759	H. sapiens	LINC00342	long intergenic non-protein coding RNA 342								0	0	0	0	0	0	0	0	0	0	0	0	0	0	0	0	0	0	0	0
LINC00632	286411	symbol	H. sapiens	286411	H. sapiens	LINC00632	long intergenic non-protein coding RNA 632								0	0	0	0	0	0	0	0	0	0	0	0	0	0	0	0	0	0	0	0
LINC00847	729678	symbol	H. sapiens	729678	H. sapiens	LINC00847	long intergenic non-protein coding RNA 847								0	0	0	0	0	0	0	0	0	0	0	0	0	0	0	0	0	0	0	0
LINC01119	100134259	symbol	H. sapiens	100134259	H. sapiens	LINC01119	long intergenic non-protein coding RNA 1119								0	0	0	0	0	0	0	0	0	0	0	0	0	0	0	0	0	0	0	0
LINS	55180	gene_synonym	H. sapiens	55180	H. sapiens	LINS1	lines homolog 1	GO:0050890 cognition;GO:0050877 nervous system process;GO:0003008 system process		Predicted intracellular proteins; Disease related genes	Nucleoplasm (Approved)				0	0	0	0	0	0	0	0	0	0	0	0	0	0	0	0	0	0	0	0
LMLN	89782	symbol	H. sapiens	89782	H. sapiens	LMLN	leishmanolysin like peptidase	GO:0051301 cell division;GO:0007155 cell adhesion;GO:0022610 biological adhesion		Predicted intracellular proteins; Peptidases:Metallopeptidases; Enzymes	Cytosol (Supported); Additional: Focal adhesion sites				0	1	0	0	0	0	0	0	0	0	0	0	0	0	0	0	0	0	0	0
LOC100049716	100049716	Gene_ID	H. sapiens	100049716	H. sapiens	NINJ2-AS1	NINJ2 antisense RNA 1								0	0	0	0	0	0	0	0	0	0	0	0	0	0	0	0	0	0	0	0
LOC100128239	100128239	Gene_ID	H. sapiens	100128239	H. sapiens	LINC02731	long intergenic non-protein coding RNA 2731								0	0	0	0	0	0	0	0	0	0	0	0	0	0	0	0	0	0	0	0
LOC100288637	100288637	Gene_ID	H. sapiens	100288637	H. sapiens	LOC100288637	OTU deubiquitinase 7A pseudogene								0	0	0	0	0	0	0	0	0	0	0	0	0	0	0	0	0	0	0	0
LOC100294145	100294145	Gene_ID	H. sapiens	100294145	H. sapiens	LOC100294145	uncharacterized LOC100294145								0	0	0	0	0	0	0	0	0	0	0	0	0	0	0	0	0	0	0	0
LOC100506127	100506127	Gene_ID	H. sapiens	100506127	H. sapiens	GVQW3	GVQW motif containing 3			Predicted intracellular proteins	Centrosome;Nucleoplasm (Approved); Additional: Endoplasmic reticulum				0	0	0	0	0	0	0	0	0	0	0	0	0	0	0	0	0	0	0	0
LOC101929718	101929718	Gene_ID	H. sapiens	101929718	H. sapiens	LOC101929718	uncharacterized LOC101929718								0	0	0	0	0	0	0	0	0	0	0	0	0	0	0	0	0	0	0	0
LOC101929767	101929767	Gene_ID	H. sapiens	101929767	H. sapiens	LOC101929767	uncharacterized LOC101929767								0	0	0	0	0	0	0	0	0	0	0	0	0	0	0	0	0	0	0	0
LOC102724009	102724009	Gene_ID	H. sapiens	102724009	H. sapiens	KIF1C-AS1	KIF1C antisense RNA 1								0	0	0	0	0	0	0	0	0	0	0	0	0	0	0	0	0	0	0	0
LOC104968399	104968399	Gene_ID	H. sapiens	104968399	H. sapiens	MYL12-AS1	MYL12A and MYL12B antisense RNA 1								0	0	0	0	0	0	0	0	0	0	0	0	0	0	0	0	0	0	0	0
LOC150776	150776	Gene_ID	H. sapiens	150776	H. sapiens	SMPD4BP	sphingomyelin phosphodiesterase 4B, pseudogene								0	0	0	0	0	0	0	0	0	0	0	0	0	0	0	0	0	0	0	0
LOC220729	220729	Gene_ID	H. sapiens	220729	H. sapiens	SDHAP4	SDHA pseudogene 4								0	0	0	0	0	0	0	0	0	0	0	0	0	0	0	0	0	0	0	0
LOC81691	81691	Gene_ID	H. sapiens	81691	H. sapiens	REXO5	RNA exonuclease 5	GO:0090305 nucleic acid phosphodiester bond hydrolysis;GO:0090304 nucleic acid metabolic process;GO:0006139 nucleobase-containing compound metabolic process		Predicted intracellular proteins	Nuclear membrane (Approved); Additional: Endoplasmic reticulum;Nucleoli				0	0	0	0	0	0	0	0	0	0	0	0	0	0	0	0	0	0	0	0
LOX	4015	symbol	H. sapiens	4015	H. sapiens	LOX	lysyl oxidase	GO:0035906 descending aorta development;GO:0035905 ascending aorta development;GO:0018057 peptidyl-lysine oxidation		Disease related genes; ENZYME proteins:Oxidoreductases; Potential drug targets; Predicted secreted proteins; Enzymes	Endoplasmic reticulum (Approved)		(M3468)NABA ECM REGULATORS; (M5885)NABA MATRISOME ASSOCIATED; (M5889)NABA MATRISOME	(M5891)HALLMARK HYPOXIA; (M5930)HALLMARK EPITHELIAL MESENCHYMAL TRANSITION	0	0	0	0	0	0	0	0	0	0	0	0	1	0	0	0	0	0	0	0
LPAR6	10161	symbol	H. sapiens	10161	H. sapiens	LPAR6	lysophosphatidic acid receptor 6	GO:0001835 blastocyst hatching;GO:0035188 hatching;GO:0071684 organism emergence from protective structure		Potential drug targets; Disease related genes; G-protein coupled receptors:GPCRs excl olfactory receptors; G-protein coupled receptors:Lysolipids receptors				(M5911)HALLMARK INTERFERON ALPHA RESPONSE	0	0	0	0	0	0	0	0	0	0	0	0	0	0	0	0	0	0	0	0
LRR1	122769	symbol	H. sapiens	122769	H. sapiens	LRR1	leucine rich repeat protein 1	GO:0016567 protein ubiquitination;GO:0032446 protein modification by small protein conjugation;GO:0070647 protein modification by small protein conjugation or removal		Predicted intracellular proteins	Nuclear membrane;Nucleoplasm (Approved); Additional: Vesicles				0	0	0	0	0	0	0	0	0	0	0	1	0	0	0	0	0	0	0	0
LRRC34	151827	symbol	H. sapiens	151827	H. sapiens	LRRC34	leucine rich repeat containing 34	GO:0030154 cell differentiation;GO:0048869 cellular developmental process;GO:0032502 developmental process		Predicted intracellular proteins	Cell Junctions;Microtubules (Approved); Additional: Cytokinetic bridge;Mitotic spindle				0	0	0	0	0	0	0	0	0	0	0	0	0	0	0	0	0	0	0	0
LRRC6	23639	gene_synonym	H. sapiens	23639	H. sapiens	DNAAF11	dynein axonemal assembly factor 11	GO:0120229 protein localization to motile cilium;GO:0090660 cerebrospinal fluid circulation;GO:0060287 epithelial cilium movement involved in determination of left/right asymmetry		Predicted intracellular proteins; Disease related genes					0	0	0	1	0	0	0	0	0	0	0	0	0	0	0	0	0	0	0	0
LRRCC1	85444	symbol	H. sapiens	85444	H. sapiens	LRRCC1	leucine rich repeat and coiled-coil centrosomal protein 1	GO:0051301 cell division;GO:0007049 cell cycle;GO:0009987 cellular process		Predicted intracellular proteins	Centrosome (Supported)				0	1	0	0	0	0	0	0	0	0	0	0	0	0	0	0	0	0	0	0
LTV1	84946	symbol	H. sapiens	84946	H. sapiens	LTV1	LTV1 ribosome biogenesis factor	GO:0000056 ribosomal small subunit export from nucleus;GO:0000054 ribosomal subunit export from nucleus;GO:0033750 ribosome localization		Predicted intracellular proteins	Cytosol (Enhanced); Additional: Nucleoplasm				0	0	0	0	1	0	0	0	0	1	0	0	0	0	0	0	0	0	0	0
LUC7L3	51747	symbol	H. sapiens	51747	H. sapiens	LUC7L3	LUC7 like 3 pre-mRNA splicing factor	GO:0006376 mRNA splice site selection;GO:0000245 spliceosomal complex assembly;GO:0022618 ribonucleoprotein complex assembly		Predicted intracellular proteins	Nuclear speckles (Enhanced)			(M5925)HALLMARK E2F TARGETS	0	0	0	0	1	0	0	0	0	0	0	0	0	0	0	0	0	0	0	0
LZIC	84328	symbol	H. sapiens	84328	H. sapiens	LZIC	leucine zipper and CTNNBIP1 domain containing	GO:0010212 response to ionizing radiation;GO:0009314 response to radiation;GO:0009628 response to abiotic stimulus		Predicted intracellular proteins	Nucleoplasm (Approved); Additional: Cytosol				0	0	0	0	0	0	0	0	0	0	0	0	0	0	0	0	0	0	0	0
LZTFL1	54585	symbol	H. sapiens	54585	H. sapiens	LZTFL1	leucine zipper transcription factor like 1	GO:1903568 negative regulation of protein localization to ciliary membrane;GO:1903565 negative regulation of protein localization to cilium;GO:1903567 regulation of protein localization to ciliary membrane		Predicted intracellular proteins; Disease related genes	Cytosol (Supported)				0	0	0	0	0	0	0	0	0	0	0	0	0	1	0	0	0	0	0	0
MAD2L1	4085	symbol	H. sapiens	4085	H. sapiens	MAD2L1	mitotic arrest deficient 2 like 1	GO:0090232 positive regulation of spindle checkpoint;GO:0090267 positive regulation of mitotic cell cycle spindle assembly checkpoint;GO:0051660 establishment of centrosome localization		Predicted intracellular proteins; Cancer-related genes:Candidate cancer biomarkers	Nucleoplasm (Approved)			(M5901)HALLMARK G2M CHECKPOINT; (M5925)HALLMARK E2F TARGETS; (M5926)HALLMARK MYC TARGETS V1	1	1	0	1	0	0	0	0	1	1	0	1	0	0	0	0	0	0	0	0
MADD	8567	symbol	H. sapiens	8567	H. sapiens	MADD	MAP kinase activating death domain	GO:0032483 regulation of Rab protein signal transduction;GO:0032482 Rab protein signal transduction;GO:1902041 regulation of extrinsic apoptotic signaling pathway via death domain receptors		Predicted intracellular proteins	Cytosol;Plasma membrane (Supported)		(M144)PID CERAMIDE PATHWAY; (M128)PID TNF PATHWAY; (M220)PID CASPASE PATHWAY	(M5902)HALLMARK APOPTOSIS	0	0	0	0	0	0	0	0	0	0	0	0	0	0	0	0	0	0	0	0
MAPK8	5599	symbol	H. sapiens	5599	H. sapiens	MAPK8	mitogen-activated protein kinase 8	GO:1902595 regulation of DNA replication origin binding;GO:0007258 JUN phosphorylation;GO:1900739 regulation of protein insertion into mitochondrial membrane involved in apoptotic signaling pathway	CMGC Ser/Thr protein kinase family	ENZYME proteins:Transferases; Kinases:CMGC Ser/Thr protein kinases; Predicted intracellular proteins; RAS pathway related proteins; Cancer-related genes:Candidate cancer biomarkers; Enzymes		Tamoxifen; Pyrazolanthrone; 6-CHLORO-9-HYDROXY-1,3-DIMETHYL-1,9-DIHYDRO-4H-PYRAZOLO[3,4-B]QUINOLIN-4-ONE; 2-({2-[(3-HYDROXYPHENYL)AMINO]PYRIMIDIN-4-YL}AMINO)BENZAMIDE; N-(4-AMINO-5-CYANO-6-ETHOXYPYRIDIN-2-YL)-2-(4-BROMO-2,5-DIMETHOXYPHENYL)ACETAMIDE; 5-CYANO-N-(2,5-DIMETHOXYBENZYL)-6-ETHOXYPYRIDINE-2-CARBOXAMIDE; 2-fluoro-6-{[2-({2-methoxy-4-[(methylsulfonyl)methyl]phenyl}amino)-7H-pyrrolo[2,3-d]…	(M190)PID TCR JNK PATHWAY; (M268)PID S1P S1P2 PATHWAY; (M69)PID REELIN PATHWAY	(M5923)HALLMARK PI3K AKT MTOR SIGNALING	0	0	1	0	0	0	0	0	0	0	0	1	1	0	0	0	0	0	0	0
MAPK9	5601	symbol	H. sapiens	5601	H. sapiens	MAPK9	mitogen-activated protein kinase 9	GO:0061833 protein localization to tricellular tight junction;GO:1901483 regulation of transcription factor catabolic process;GO:1901485 positive regulation of transcription factor catabolic process	CMGC Ser/Thr protein kinase family	ENZYME proteins:Transferases; Kinases:CMGC Ser/Thr protein kinases; Predicted intracellular proteins; RAS pathway related proteins; Enzymes		N-{3-[5-(1H-1,2,4-triazol-3-yl)-1H-indazol-3-yl]phenyl}furan-2-carboxamide; Fostamatinib	(M45)PID CD40 PATHWAY; (M193)PID NEPHRIN NEPH1 PATHWAY; (M23)PID WNT NONCANONICAL PATHWAY	(M5923)HALLMARK PI3K AKT MTOR SIGNALING	0	0	0	1	0	0	0	0	0	0	0	1	0	0	0	0	0	0	0	0
MASTL	84930	symbol	H. sapiens	84930	H. sapiens	MASTL	microtubule associated serine/threonine kinase like	GO:0032515 negative regulation of phosphoprotein phosphatase activity;GO:0035308 negative regulation of protein dephosphorylation;GO:0010923 negative regulation of phosphatase activity	AGC Ser/Thr protein kinase family	Disease related genes; Kinases:AGC Ser/Thr protein kinases; ENZYME proteins:Transferases; Predicted intracellular proteins; Potential drug targets; Enzymes	Nucleoplasm (Enhanced)				1	1	1	0	0	0	0	0	0	0	0	0	0	0	0	0	1	0	0	0
MBD4	8930	symbol	H. sapiens	8930	H. sapiens	MBD4	methyl-CpG binding domain 4, DNA glycosylase	GO:0045008 depyrimidination;GO:0006285 base-excision repair, AP site formation;GO:0009223 pyrimidine deoxyribonucleotide catabolic process		Predicted intracellular proteins; Cancer-related genes:Candidate cancer biomarkers	Nuclear speckles (Supported)				0	0	1	0	0	0	0	0	0	0	0	0	0	0	0	0	0	0	0	0
MBIP	51562	symbol	H. sapiens	51562	H. sapiens	MBIP	MAP3K12 binding inhibitory protein 1	GO:0043966 histone H3 acetylation;GO:0046330 positive regulation of JNK cascade;GO:0032874 positive regulation of stress-activated MAPK cascade		Predicted intracellular proteins	Cytosol (Supported); Additional: Nucleoli;Nucleoplasm				0	0	0	0	0	0	0	0	0	0	0	0	1	0	0	0	0	0	0	0
MBTPS2	51360	symbol	H. sapiens	51360	H. sapiens	MBTPS2	membrane bound transcription factor peptidase, site 2	GO:0036500 ATF6-mediated unfolded protein response;GO:1990440 positive regulation of transcription from RNA polymerase II promoter in response to endoplasmic reticulum stress;GO:0031293 membrane protein intracellular domain proteolysis		Disease related genes; Potential drug targets; Peptidases:Metallopeptidases; ENZYME proteins:Hydrolases; Enzymes	Cytosol;Mitochondria;Nucleoplasm (Approved)				0	0	0	0	0	0	0	0	0	0	0	0	0	0	0	0	0	0	0	0
MCHR1	2847	symbol	H. sapiens	2847	H. sapiens	MCHR1	melanin concentrating hormone receptor 1	GO:0007193 adenylate cyclase-inhibiting G protein-coupled receptor signaling pathway;GO:0007631 feeding behavior;GO:0007218 neuropeptide signaling pathway		Transporters; G-protein coupled receptors:GPCRs excl olfactory receptors		Haloperidol			0	0	0	0	0	0	0	0	0	0	0	0	0	1	0	0	0	0	0	0
MCM10	55388	symbol	H. sapiens	55388	H. sapiens	MCM10	minichromosome maintenance 10 replication initiation factor	GO:0006270 DNA replication initiation;GO:0006261 DNA-dependent DNA replication;GO:0006260 DNA replication		Predicted intracellular proteins	Nucleoli;Nucleoplasm (Supported)				1	0	1	0	0	1	0	1	0	0	0	0	0	0	0	0	0	0	0	0
MCM3	4172	symbol	H. sapiens	4172	H. sapiens	MCM3	minichromosome maintenance complex component 3	GO:1902292 cell cycle DNA replication initiation;GO:1902315 nuclear cell cycle DNA replication initiation;GO:1902975 mitotic DNA replication initiation		Enzymes; Predicted intracellular proteins; ENZYME proteins:Hydrolases; Cancer-related genes:Candidate cancer biomarkers	Nucleoplasm (Supported)		(M40)PID E2F PATHWAY	(M5901)HALLMARK G2M CHECKPOINT; (M5925)HALLMARK E2F TARGETS	1	1	1	0	0	1	0	1	0	0	0	1	0	0	0	0	0	0	0	0
MCM4	4173	symbol	H. sapiens	4173	H. sapiens	MCM4	minichromosome maintenance complex component 4	GO:1902292 cell cycle DNA replication initiation;GO:1902315 nuclear cell cycle DNA replication initiation;GO:1902975 mitotic DNA replication initiation		Disease related genes; Predicted intracellular proteins; Potential drug targets; ENZYME proteins:Hydrolases; Enzymes	Nucleoplasm (Enhanced)		(M195)PID CMYB PATHWAY	(M5928)HALLMARK MYC TARGETS V2; (M5924)HALLMARK MTORC1 SIGNALING; (M5925)HALLMARK E2F TARGETS	1	1	1	0	0	1	0	1	0	0	0	1	0	0	0	0	0	0	0	0
MCM6	4175	symbol	H. sapiens	4175	H. sapiens	MCM6	minichromosome maintenance complex component 6	GO:0000727 double-strand break repair via break-induced replication;GO:1902969 mitotic DNA replication;GO:0006268 DNA unwinding involved in DNA replication		Predicted intracellular proteins; Enzymes; ENZYME proteins:Hydrolases	Nucleoplasm (Enhanced)			(M5901)HALLMARK G2M CHECKPOINT; (M5925)HALLMARK E2F TARGETS; (M5926)HALLMARK MYC TARGETS V1	1	1	1	0	0	1	0	1	0	0	0	1	0	0	0	0	0	0	0	0
MCM8	84515	symbol	H. sapiens	84515	H. sapiens	MCM8	minichromosome maintenance 8 homologous recombination repair factor	GO:0036298 recombinational interstrand cross-link repair;GO:0071168 protein localization to chromatin;GO:0036297 interstrand cross-link repair		Disease related genes; Predicted intracellular proteins; Potential drug targets; ENZYME proteins:Hydrolases; Enzymes	Nucleoplasm (Supported)				0	0	1	0	0	1	0	0	0	0	0	0	0	0	0	1	0	0	0	0
MCMBP	79892	symbol	H. sapiens	79892	H. sapiens	MCMBP	minichromosome maintenance complex binding protein	GO:0007062 sister chromatid cohesion;GO:0006261 DNA-dependent DNA replication;GO:0000819 sister chromatid segregation		Predicted intracellular proteins	Nucleoplasm (Enhanced); Additional: Cell Junctions;Cytosol				0	1	0	0	0	1	0	0	0	0	0	0	0	0	0	0	0	0	0	1
MCTS1	28985	symbol	H. sapiens	28985	H. sapiens	MCTS1	MCTS1 re-initiation and release factor	GO:0002188 translation reinitiation;GO:0032790 ribosome disassembly;GO:0001731 formation of translation preinitiation complex		Predicted intracellular proteins	Cytosol (Supported); Additional: Plasma membrane				0	0	1	0	0	0	0	0	0	0	0	0	0	0	0	0	0	0	0	0
MDC1	9656	symbol	H. sapiens	9656	H. sapiens	MDC1	mediator of DNA damage checkpoint 1	GO:0031573 mitotic intra-S DNA damage checkpoint signaling;GO:0044773 mitotic DNA damage checkpoint signaling;GO:0044774 mitotic DNA integrity checkpoint signaling		Cancer-related genes:Mutational cancer driver genes; Predicted intracellular proteins	Nuclear bodies (Supported); Additional: Nucleoplasm		(M84)PID ATM PATHWAY		1	1	1	0	0	0	0	0	0	0	0	0	0	0	0	0	1	0	0	0
MDM1	56890	symbol	H. sapiens	56890	H. sapiens	MDM1	Mdm1 nuclear protein	GO:0046600 negative regulation of centriole replication;GO:0010826 negative regulation of centrosome duplication;GO:0046606 negative regulation of centrosome cycle		Predicted intracellular proteins	Centrosome (Supported); Additional: Cytosol				0	1	0	1	0	0	0	0	0	0	0	0	0	0	1	0	0	0	0	0
MED1	5469	symbol	H. sapiens	5469	H. sapiens	MED1	mediator complex subunit 1	GO:0048822 enucleate erythrocyte development;GO:0060751 branch elongation involved in mammary gland duct branching;GO:0042695 thelarche		Predicted intracellular proteins; Cancer-related genes:Candidate cancer biomarkers	Nucleoplasm (Supported)	Becocalcidiol	(M162)PID RXR VDR PATHWAY; (M58)PID AR PATHWAY; (M200)PID ERA GENOMIC PATHWAY		0	1	0	0	1	0	0	0	1	0	0	0	0	1	0	0	0	0	0	0
MED14	9282	symbol	H. sapiens	9282	H. sapiens	MED14	mediator complex subunit 14	GO:0060261 positive regulation of transcription initiation from RNA polymerase II promoter;GO:2000144 positive regulation of DNA-templated transcription, initiation;GO:0060260 regulation of transcription initiation from RNA polymerase II promoter		Predicted intracellular proteins	Nucleoplasm (Approved)				0	0	0	0	0	0	0	0	0	0	0	0	0	0	0	0	0	0	0	0
MED17	9440	symbol	H. sapiens	9440	H. sapiens	MED17	mediator complex subunit 17	GO:0060261 positive regulation of transcription initiation from RNA polymerase II promoter;GO:2000144 positive regulation of DNA-templated transcription, initiation;GO:0060260 regulation of transcription initiation from RNA polymerase II promoter		Cancer-related genes:Mutational cancer driver genes; Predicted intracellular proteins; Disease related genes	Nuclear speckles (Approved); Additional: Cytosol				0	0	0	0	0	0	0	0	0	0	0	0	0	0	0	0	0	0	0	0
MED23	9439	symbol	H. sapiens	9439	H. sapiens	MED23	mediator complex subunit 23	GO:0006367 transcription initiation from RNA polymerase II promoter;GO:0006352 DNA-templated transcription, initiation;GO:0010628 positive regulation of gene expression		Cancer-related genes:Mutated cancer genes; Predicted intracellular proteins; Disease related genes	Nucleoplasm;Vesicles (Approved)				0	0	0	0	0	0	0	0	0	0	0	0	0	0	0	0	0	0	0	0
MED7	9443	symbol	H. sapiens	9443	H. sapiens	MED7	mediator complex subunit 7	GO:0006367 transcription initiation from RNA polymerase II promoter;GO:0006352 DNA-templated transcription, initiation;GO:0019827 stem cell population maintenance		Predicted intracellular proteins	Nuclear bodies (Supported)				0	0	0	0	0	0	0	0	0	0	0	0	0	0	0	0	0	0	0	0
MELK	9833	symbol	H. sapiens	9833	H. sapiens	MELK	maternal embryonic leucine zipper kinase	GO:0008631 intrinsic apoptotic signaling pathway in response to oxidative stress;GO:0036473 cell death in response to oxidative stress;GO:0000086 G2/M transition of mitotic cell cycle	CAMK Ser/Thr protein kinase family	Disease related genes; ENZYME proteins:Transferases; Predicted intracellular proteins; Potential drug targets; Kinases:CAMK Ser/Thr protein kinases; Enzymes		Fostamatinib		(M5925)HALLMARK E2F TARGETS	0	1	0	0	0	0	0	0	0	0	0	0	0	0	0	0	1	0	0	0
METAP1	23173	symbol	H. sapiens	23173	H. sapiens	METAP1	methionyl aminopeptidase 1	GO:0070084 protein initiator methionine removal;GO:0018206 peptidyl-methionine modification;GO:0031365 N-terminal protein amino acid modification		Predicted intracellular proteins; Peptidases:Metallopeptidases; Enzymes; ENZYME proteins:Hydrolases	Cytosol (Approved); Additional: Nucleoplasm;Plasma membrane	Ovalicin; 5-CHLORO-6-METHYL-N-(2-PHENYLETHYL)-2-PYRIDIN-2-YLPYRIMIDIN-4-AMINE; TERT-BUTYL {2-[(1,3-THIAZOL-2-YLAMINO)CARBONYL]PYRIDIN-3-YL}CARBAMATE; 3-[(2,2-DIMETHYLPROPANOYL)AMINO]-N-1,3-THIAZOL-2-YLPYRIDINE-2-CARBOXAMIDE		(M5935)HALLMARK FATTY ACID METABOLISM	0	0	0	0	0	0	0	0	0	0	0	0	0	0	0	0	0	0	0	0
METTL17	64745	symbol	H. sapiens	64745	H. sapiens	METTL17	methyltransferase like 17	GO:0042274 ribosomal small subunit biogenesis;GO:0042254 ribosome biogenesis;GO:0032259 methylation		Predicted intracellular proteins	Nucleoplasm (Enhanced)				0	0	0	0	0	0	0	0	0	0	0	0	0	0	0	0	0	0	0	0
METTL4	64863	symbol	H. sapiens	64863	H. sapiens	METTL4	methyltransferase 4, N6-adenosine	GO:0032775 DNA methylation on adenine;GO:0120049 snRNA (adenine-N6)-methylation;GO:1903108 regulation of mitochondrial transcription		Predicted intracellular proteins	Mitochondria (Approved)				0	0	0	0	1	1	0	0	0	0	0	0	0	0	0	0	0	0	0	0
METTL6	131965	symbol	H. sapiens	131965	H. sapiens	METTL6	methyltransferase 6, methylcytidine	GO:0030488 tRNA methylation;GO:0001510 RNA methylation;GO:0006400 tRNA modification		Predicted intracellular proteins	Vesicles (Approved)				0	0	0	0	0	0	0	0	0	0	0	0	0	0	0	0	0	0	0	0
MFAP4	4239	symbol	H. sapiens	4239	H. sapiens	MFAP4	microfibril associated protein 4	GO:0071493 cellular response to UV-B;GO:0048251 elastic fiber assembly;GO:0001867 complement activation, lectin pathway		Predicted secreted proteins	Endoplasmic reticulum (Approved)		(M3008)NABA ECM GLYCOPROTEINS; (M5884)NABA CORE MATRISOME; (M5889)NABA MATRISOME		0	0	0	0	0	0	0	0	0	0	0	0	0	0	0	0	0	0	0	0
MGME1	92667	symbol	H. sapiens	92667	H. sapiens	MGME1	mitochondrial genome maintenance exonuclease 1	GO:0043504 mitochondrial DNA repair;GO:0032042 mitochondrial DNA metabolic process;GO:0006264 mitochondrial DNA replication		Predicted intracellular proteins; Disease related genes	Mitochondria (Supported)				0	0	1	0	0	1	0	0	0	0	0	0	0	0	0	0	0	0	0	0
MGST1	4257	symbol	H. sapiens	4257	H. sapiens	MGST1	microsomal glutathione S-transferase 1	GO:0071449 cellular response to lipid hydroperoxide;GO:0006982 response to lipid hydroperoxide;GO:0071447 cellular response to hydroperoxide		Predicted intracellular proteins; Enzymes; ENZYME proteins:Transferases	Mitochondria (Approved); Additional: Endoplasmic reticulum	Glutathione; Glutathione disulfide		(M5938)HALLMARK REACTIVE OXYGEN SPECIES PATHWAY	0	0	0	0	0	0	0	0	0	0	0	0	0	0	0	0	0	0	0	0
MICU1	10367	symbol	H. sapiens	10367	H. sapiens	MICU1	mitochondrial calcium uptake 1	GO:1900069 regulation of cellular hyperosmotic salinity response;GO:1901000 regulation of response to salt stress;GO:0071475 cellular hyperosmotic salinity response		Transporters:Accessory Factors Involved in Transport; Potential drug targets; Disease related genes; Predicted intracellular proteins	Mitochondria (Supported)				0	0	0	0	0	0	0	0	0	0	0	0	0	0	0	0	0	0	0	0
MIR155HG	114614	symbol	H. sapiens	114614	H. sapiens	MIR155HG	MIR155 host gene	GO:0035195 gene silencing by miRNA;GO:0035194 post-transcriptional gene silencing by RNA;GO:0016441 posttranscriptional gene silencing							0	0	0	0	0	0	0	0	0	0	0	0	0	0	0	0	0	0	0	0
MIR210HG	100506211	symbol	H. sapiens	100506211	H. sapiens	MIR210HG	MIR210 host gene								0	0	0	0	0	0	0	0	0	0	0	0	0	0	0	0	0	0	0	0
MIR4697HG	22997	gene_synonym	H. sapiens	22997	H. sapiens	IGSF9B	immunoglobulin superfamily member 9B	GO:0007155 cell adhesion;GO:0022610 biological adhesion;GO:0007399 nervous system development		Predicted intracellular proteins	Cytosol (Approved)				0	0	0	0	0	0	0	0	0	0	0	0	0	0	0	0	0	0	0	0
MIR503HG	84848	symbol	H. sapiens	84848	H. sapiens	MIR503HG	MIR503 host gene								0	0	0	0	0	0	0	0	0	0	0	0	0	0	0	0	0	0	0	0
MIR5047	100616408	symbol	H. sapiens	100616408	H. sapiens	MIR5047	microRNA 5047								0	0	0	0	0	0	0	0	0	0	0	0	0	0	0	0	0	0	0	0
MIS12	79003	symbol	H. sapiens	79003	H. sapiens	MIS12	MIS12 kinetochore complex component	GO:0051315 attachment of mitotic spindle microtubules to kinetochore;GO:0051382 kinetochore assembly;GO:0034501 protein localization to kinetochore		Predicted intracellular proteins					1	1	0	1	0	0	0	0	0	1	0	0	0	0	0	1	0	0	0	0
MIS18BP1	55320	symbol	H. sapiens	55320	H. sapiens	MIS18BP1	MIS18 binding protein 1	GO:0051301 cell division;GO:0007049 cell cycle;GO:0009987 cellular process		Predicted intracellular proteins	Nucleoli (Approved); Additional: Cytosol				1	1	0	0	0	0	0	0	0	0	0	0	0	0	0	0	0	0	1	0
MKI67	4288	symbol	H. sapiens	4288	H. sapiens	MKI67	marker of proliferation Ki-67	GO:1902275 regulation of chromatin organization;GO:0051983 regulation of chromosome segregation;GO:0007088 regulation of mitotic nuclear division		Predicted intracellular proteins; Cancer-related genes:Candidate cancer biomarkers	Nucleoli rim;Nucleoplasm (Enhanced); Additional: Mitotic chromosome			(M5901)HALLMARK G2M CHECKPOINT; (M5925)HALLMARK E2F TARGETS	0	1	0	0	0	0	0	0	0	0	0	0	0	0	0	0	0	0	0	0
MKL2	57496	gene_synonym	H. sapiens	57496	H. sapiens	MRTFB	myocardin related transcription factor B	GO:0045844 positive regulation of striated muscle tissue development;GO:0048636 positive regulation of muscle organ development;GO:1901863 positive regulation of muscle tissue development		Predicted intracellular proteins; Disease related genes	Nuclear speckles (Supported)				0	0	0	0	0	0	0	0	0	0	0	0	0	0	0	0	0	0	0	0
MLH1	4292	symbol	H. sapiens	4292	H. sapiens	MLH1	mutL homolog 1	GO:0043060 meiotic metaphase I plate congression;GO:0051311 meiotic metaphase plate congression;GO:0051257 meiotic spindle midzone assembly		Predicted intracellular proteins; Disease related genes; Cancer-related genes:Candidate cancer biomarkers	Nucleoplasm (Enhanced)		(M145)PID P53 DOWNSTREAM PATHWAY	(M5925)HALLMARK E2F TARGETS	1	1	1	1	1	0	1	0	0	1	0	0	0	0	0	0	0	0	0	0
MLLT10	8028	symbol	H. sapiens	8028	H. sapiens	MLLT10	MLLT10 histone lysine methyltransferase DOT1L cofactor	GO:0045944 positive regulation of transcription by RNA polymerase II;GO:0045893 positive regulation of transcription, DNA-templated;GO:1903508 positive regulation of nucleic acid-templated transcription		Cancer-related genes:Mutational cancer driver genes; Predicted intracellular proteins; Disease related genes	Nucleoplasm (Supported)			(M5951)HALLMARK SPERMATOGENESIS	0	0	0	0	0	0	0	0	0	0	0	0	0	0	0	0	0	0	0	0
MME	4311	symbol	H. sapiens	4311	H. sapiens	MME	membrane metalloendopeptidase	GO:0046449 creatinine metabolic process;GO:0061837 neuropeptide processing;GO:0072338 cellular lactam metabolic process		CD markers; Disease related genes; Predicted intracellular proteins; Peptidases:Metallopeptidases; ENZYME proteins:Hydrolases; Cancer-related genes:Candidate cancer biomarkers; FDA approved drug targets:Small molecule drugs; Candidate cardiovascular disease genes; Enzymes		Candoxatril; Omapatrilat; N-[3-[(1-Aminoethyl)(Hydroxy)Phosphoryl]-2-(1,1'-Biphenyl-4-Ylmethyl)Propanoyl]Alanine; Phosphoramidon; N-(3-Phenyl-2-Sulfanylpropanoyl)Phenylalanylalanine; [2(R,S)-2-Sulfanylheptanoyl]-Phe-Ala; Daglutril; 2-[(1S)-1-BENZYL-2-SULFANYLETHYL]-1H-IMIDAZO[4,5-C]PYRIDIN-5-IUM; Thiorphan; Sacubitril; Candoxatrilat			0	0	0	0	0	0	0	0	0	0	0	0	0	0	0	0	0	0	0	0
MMP12	4321	symbol	H. sapiens	4321	H. sapiens	MMP12	matrix metallopeptidase 12	GO:1904905 negative regulation of endothelial cell-matrix adhesion via fibronectin;GO:0060309 elastin catabolic process;GO:0060435 bronchiole development		Peptidases:Metallopeptidases; ENZYME proteins:Hydrolases; Cancer-related genes:Candidate cancer biomarkers; FDA approved drug targets:Small molecule drugs; Predicted secreted proteins; Enzymes		Acetohydroxamic acid; Marimastat; CP-271485; PF-00356231; Batimastat; 2-[2-(1,3-Dioxo-1,3-Dihydro-2h-Isoindol-2-Yl)Ethyl]-4-(4'-Ethoxy-1,1'-Biphenyl-4-Yl)-4-Oxobutanoic Acid; AE-941; (1S,5S,7R)-N~7~-(BIPHENYL-4-YLMETHYL)-N~3~-HYDROXY-6,8-DIOXA-3-AZABICYCLO[3.2.1]OCTANE-3,7-DICARBOXAMIDE; N-(biphenyl-4-ylsulfonyl)-D-leucine; CGS-27023; N-(dibenzo[b,d]thiophen-3-ylsulfonyl)-L-valine; N-oxo-2-[(4-ph…	(M174)PID UPA UPAR PATHWAY; (M3468)NABA ECM REGULATORS; (M5885)NABA MATRISOME ASSOCIATED	(M5921)HALLMARK COMPLEMENT	0	0	0	0	0	0	0	0	0	0	0	0	0	0	0	0	0	0	0	0
MMP2	4313	symbol	H. sapiens	4313	H. sapiens	MMP2	matrix metallopeptidase 2	GO:0001957 intramembranous ossification;GO:0036072 direct ossification;GO:0001955 blood vessel maturation		Disease related genes; Predicted intracellular proteins; Cancer-related genes:Mutational cancer driver genes; Peptidases:Metallopeptidases; ENZYME proteins:Hydrolases; Cancer-related genes:Candidate cancer biomarkers; FDA approved drug targets:Small molecule drugs; Candidate cardiovascular disease genes; Predicted secreted proteins; Enzymes	Vesicles (Approved)	Marimastat; Captopril; SC-74020; Halofuginone; AE-941; Endostatin	(M63)PID AVB3 OPN PATHWAY; (M240)PID SYNDECAN 2 PATHWAY; (M65)PID FRA PATHWAY	(M5946)HALLMARK COAGULATION; (M5902)HALLMARK APOPTOSIS; (M5915)HALLMARK APICAL JUNCTION	0	0	0	0	0	0	0	0	0	0	0	0	0	0	0	0	0	0	0	0
MND1	84057	symbol	H. sapiens	84057	H. sapiens	MND1	meiotic nuclear divisions 1	GO:0007131 reciprocal meiotic recombination;GO:0140527 reciprocal homologous recombination;GO:0035825 homologous recombination		Predicted intracellular proteins					1	1	1	0	0	0	1	0	0	0	0	0	0	0	0	0	0	0	0	0
MNS1	55329	symbol	H. sapiens	55329	H. sapiens	MNS1	meiosis specific nuclear structural 1	GO:0070986 left/right axis specification;GO:0060972 left/right pattern formation;GO:0045724 positive regulation of cilium assembly		Predicted intracellular proteins	Nuclear speckles;Nucleoplasm (Approved)				0	0	0	1	0	0	1	0	0	0	0	0	0	0	0	0	0	0	0	0
MPHOSPH10	10199	symbol	H. sapiens	10199	H. sapiens	MPHOSPH10	M-phase phosphoprotein 10	GO:0006364 rRNA processing;GO:0016072 rRNA metabolic process;GO:0042254 ribosome biogenesis		Predicted intracellular proteins	Nucleoli;Nucleoli rim (Enhanced); Additional: Mitotic chromosome			(M5928)HALLMARK MYC TARGETS V2	0	0	0	0	1	0	0	0	0	0	0	0	0	0	0	0	0	0	0	0
MPHOSPH9	10198	symbol	H. sapiens	10198	H. sapiens	MPHOSPH9	M-phase phosphoprotein 9			Predicted intracellular proteins	Cytosol;Plasma membrane (Uncertain); Additional: Nucleoplasm				0	0	0	0	0	0	0	0	0	0	0	0	0	0	0	0	0	0	0	0
MRE11A	4361	gene_synonym	H. sapiens	4361	H. sapiens	MRE11	MRE11 homolog, double strand break repair nuclease	GO:0097551 mitochondrial double-strand break repair;GO:0097552 mitochondrial double-strand break repair via homologous recombination;GO:0110025 DNA strand resection involved in replication fork processing		Predicted intracellular proteins; Disease related genes; Cancer-related genes:Candidate cancer biomarkers	Nucleoplasm (Enhanced)		(M258)PID BARD1 PATHWAY; (M84)PID ATM PATHWAY; (M1)PID FANCONI PATHWAY	(M5925)HALLMARK E2F TARGETS	1	1	1	0	0	1	1	0	0	0	0	0	0	0	0	0	1	0	0	1
MRPL13	28998	symbol	H. sapiens	28998	H. sapiens	MRPL13	mitochondrial ribosomal protein L13	GO:0017148 negative regulation of translation;GO:0034249 negative regulation of cellular amide metabolic process;GO:0006417 regulation of translation		Ribosomal proteins; Predicted intracellular proteins					0	0	0	0	0	0	0	0	0	0	0	0	0	0	0	0	0	0	0	0
MRPL48	51642	symbol	H. sapiens	51642	H. sapiens	MRPL48	mitochondrial ribosomal protein L48			Ribosomal proteins; Predicted intracellular proteins	Mitochondria (Supported)				0	0	0	0	0	0	0	0	0	0	0	0	0	0	0	0	0	0	0	0
MRPS22	56945	symbol	H. sapiens	56945	H. sapiens	MRPS22	mitochondrial ribosomal protein S22	GO:0008150 biological_process		Ribosomal proteins; Predicted intracellular proteins; Disease related genes	Mitochondria (Supported)			(M5936)HALLMARK OXIDATIVE PHOSPHORYLATION	0	0	0	0	0	0	0	0	0	0	0	0	0	0	0	0	0	0	0	0
MRPS31P5	100887750	symbol	H. sapiens	100887750	H. sapiens	MRPS31P5	mitochondrial ribosomal protein S31 pseudogene 5								0	0	0	0	0	0	0	0	0	0	0	0	0	0	0	0	0	0	0	0
MRPS6	64968	symbol	H. sapiens	64968	H. sapiens	MRPS6	mitochondrial ribosomal protein S6	GO:0032543 mitochondrial translation;GO:0140053 mitochondrial gene expression;GO:0006412 translation		Ribosomal proteins; Predicted intracellular proteins	Mitochondria (Supported)				0	0	0	0	0	0	0	0	0	0	0	0	0	0	0	0	0	0	0	0
MRRF	92399	symbol	H. sapiens	92399	H. sapiens	MRRF	mitochondrial ribosome recycling factor	GO:0032790 ribosome disassembly;GO:1903008 organelle disassembly;GO:0022411 cellular component disassembly		Predicted intracellular proteins	Cytokinetic bridge;Microtubules (Approved)				0	0	0	0	0	0	0	0	0	0	0	0	0	0	0	0	0	0	0	0
MSANTD3	91283	symbol	H. sapiens	91283	H. sapiens	MSANTD3	Myb/SANT DNA binding domain containing 3			Predicted intracellular proteins	Nucleoplasm (Approved)				0	0	0	0	0	0	0	0	0	0	0	0	0	0	0	0	0	0	0	0
MSL1	339287	symbol	H. sapiens	339287	H. sapiens	MSL1	MSL complex subunit 1	GO:0043984 histone H4-K16 acetylation;GO:0043967 histone H4 acetylation;GO:0016573 histone acetylation		Predicted intracellular proteins	Nucleoplasm (Enhanced)				0	0	0	0	0	0	0	0	0	0	0	0	1	0	0	0	0	0	0	0
MSL3	10943	symbol	H. sapiens	10943	H. sapiens	MSL3	MSL complex subunit 3	GO:0043968 histone H2A acetylation;GO:0043984 histone H4-K16 acetylation;GO:0043967 histone H4 acetylation		Predicted intracellular proteins	Nucleoplasm (Approved)				0	0	0	0	0	0	0	0	0	0	0	0	1	0	0	0	0	0	0	0
MSL3P1	151507	symbol	H. sapiens	151507	H. sapiens	MSL3P1	MSL complex subunit 3 pseudogene 1	GO:0043968 histone H2A acetylation;GO:0043984 histone H4-K16 acetylation;GO:0043967 histone H4 acetylation							0	0	0	0	0	0	0	0	0	0	0	0	1	0	0	0	0	0	0	0
MTBP	27085	symbol	H. sapiens	27085	H. sapiens	MTBP	MDM2 binding protein	GO:0007089 traversing start control point of mitotic cell cycle;GO:0034501 protein localization to kinetochore;GO:1903083 protein localization to condensed chromosome		Predicted intracellular proteins	Nucleoplasm (Approved); Additional: Nuclear bodies				0	1	0	0	0	0	0	0	1	0	0	0	0	0	0	1	0	0	0	0
MTERF3	51001	symbol	H. sapiens	51001	H. sapiens	MTERF3	mitochondrial transcription termination factor 3	GO:0061668 mitochondrial ribosome assembly;GO:0042255 ribosome assembly;GO:0042254 ribosome biogenesis		Predicted intracellular proteins	Mitochondria (Supported); Additional: Cytosol				0	0	0	1	0	0	0	0	0	0	0	0	0	0	0	0	0	0	0	0
MTFR2	113115	symbol	H. sapiens	113115	H. sapiens	MTFR2	mitochondrial fission regulator 2	GO:0000266 mitochondrial fission;GO:0009060 aerobic respiration;GO:0045333 cellular respiration		Predicted intracellular proteins	Vesicles (Uncertain)				0	1	0	0	0	0	0	0	0	0	0	0	0	0	0	0	0	0	0	0
MTIF3	219402	symbol	H. sapiens	219402	H. sapiens	MTIF3	mitochondrial translational initiation factor 3	GO:0070124 mitochondrial translational initiation;GO:0032790 ribosome disassembly;GO:0032543 mitochondrial translation		Predicted intracellular proteins	Mitochondria (Supported); Additional: Nucleoplasm				0	0	0	0	0	0	0	0	0	0	0	0	0	0	0	0	0	0	0	0
MTMR11	10903	symbol	H. sapiens	10903	H. sapiens	MTMR11	myotubularin related protein 11	GO:0046856 phosphatidylinositol dephosphorylation;GO:0046839 phospholipid dephosphorylation;GO:0046488 phosphatidylinositol metabolic process		Predicted intracellular proteins	Centrosome (Approved)				0	0	0	0	0	0	0	0	0	0	0	0	0	0	0	0	0	0	0	0
MTRF1	9617	symbol	H. sapiens	9617	H. sapiens	MTRF1	mitochondrial translation release factor 1	GO:0070126 mitochondrial translational termination;GO:0006449 regulation of translational termination;GO:0006415 translational termination		Predicted intracellular proteins				(M5936)HALLMARK OXIDATIVE PHOSPHORYLATION	0	0	0	0	0	0	0	0	0	0	0	0	0	0	0	0	0	0	0	0
MUC16	94025	symbol	H. sapiens	94025	H. sapiens	MUC16	mucin 16, cell surface associated	GO:0007155 cell adhesion;GO:0022610 biological adhesion;GO:0009987 cellular process		Predicted secreted proteins		Oregovomab	(M5880)NABA ECM AFFILIATED; (M5885)NABA MATRISOME ASSOCIATED; (M5889)NABA MATRISOME		0	0	0	0	0	0	0	0	0	0	0	0	0	0	0	0	0	0	0	0
MUT	4594	gene_synonym	H. sapiens	4594	H. sapiens	MMUT	methylmalonyl-CoA mutase	GO:0050667 homocysteine metabolic process;GO:0000096 sulfur amino acid metabolic process;GO:0009791 post-embryonic development		Disease related genes; Predicted intracellular proteins; FDA approved drug targets:Small molecule drugs; ENZYME proteins:Isomerase; Enzymes	Cytosol (Approved); Additional: Mitochondria	Cyanocobalamin; Hydroxocobalamin			0	0	0	0	0	0	0	0	0	0	0	0	0	0	0	0	0	0	0	0
MX2	4600	symbol	H. sapiens	4600	H. sapiens	MX2	MX dynamin like GTPase 2	GO:0035455 response to interferon-alpha;GO:0046822 regulation of nucleocytoplasmic transport;GO:0051028 mRNA transport		Predicted intracellular proteins; Transporters:Transporter channels and pores				(M5913)HALLMARK INTERFERON GAMMA RESPONSE	0	0	0	0	0	0	0	0	0	0	0	0	0	0	0	0	0	0	0	0
MXI1	4601	symbol	H. sapiens	4601	H. sapiens	MXI1	MAX interactor 1, dimerization protein	GO:0000122 negative regulation of transcription by RNA polymerase II;GO:0045892 negative regulation of transcription, DNA-templated;GO:1903507 negative regulation of nucleic acid-templated transcription		Transcription factors:Basic domains; Predicted intracellular proteins; Disease related genes; Cancer-related genes:Candidate cancer biomarkers	Nucleoplasm (Supported); Additional: Cytosol;Nucleoli;Nucleoli rim			(M5891)HALLMARK HYPOXIA; (M5937)HALLMARK GLYCOLYSIS; (M5945)HALLMARK HEME METABOLISM	0	0	0	0	0	0	0	0	0	0	0	0	0	0	0	0	0	0	0	0
MYO7B	4648	symbol	H. sapiens	4648	H. sapiens	MYO7B	myosin VIIB	GO:1904970 brush border assembly;GO:0030050 vesicle transport along actin filament;GO:0099515 actin filament-based transport		Predicted intracellular proteins					0	0	0	0	0	0	0	0	0	1	0	0	0	0	0	0	0	0	0	0
MYOZ3	91977	symbol	H. sapiens	91977	H. sapiens	MYOZ3	myozenin 3			Predicted intracellular proteins					0	0	0	0	0	0	0	0	0	0	0	0	0	0	0	0	0	0	0	0
MYSM1	114803	symbol	H. sapiens	114803	H. sapiens	MYSM1	Myb like, SWIRM and MPN domains 1	GO:0035521 monoubiquitinated histone deubiquitination;GO:0035522 monoubiquitinated histone H2A deubiquitination;GO:0035520 monoubiquitinated protein deubiquitination		Predicted intracellular proteins; Peptidases:Metallopeptidases; Enzymes	Nucleoplasm (Supported); Additional: Nucleoli				0	0	0	0	0	0	0	0	0	0	0	0	1	0	0	0	0	0	0	0
NAA16	79612	symbol	H. sapiens	79612	H. sapiens	NAA16	N-alpha-acetyltransferase 16, NatA auxiliary subunit	GO:0017196 N-terminal peptidyl-methionine acetylation;GO:0018206 peptidyl-methionine modification;GO:0006474 N-terminal protein amino acid acetylation		Predicted intracellular proteins	Cytosol (Enhanced)				0	0	0	0	0	0	0	0	0	0	0	0	1	0	0	0	0	0	0	0
NAA35	60560	symbol	H. sapiens	60560	H. sapiens	NAA35	N-alpha-acetyltransferase 35, NatC auxiliary subunit	GO:0017196 N-terminal peptidyl-methionine acetylation;GO:0018206 peptidyl-methionine modification;GO:0006474 N-terminal protein amino acid acetylation		Predicted intracellular proteins	Cytosol;Nucleoplasm;Plasma membrane (Approved)				0	0	0	0	0	0	0	0	0	0	0	0	1	0	0	0	0	0	0	0
NAA40	79829	symbol	H. sapiens	79829	H. sapiens	NAA40	N-alpha-acetyltransferase 40, NatD catalytic subunit	GO:0006474 N-terminal protein amino acid acetylation;GO:0043968 histone H2A acetylation;GO:0031365 N-terminal protein amino acid modification		Predicted intracellular proteins; Enzymes; ENZYME proteins:Transferases	Nucleoplasm (Supported); Additional: Centriolar satellite;Cytosol				0	0	0	0	0	0	0	0	0	0	0	0	1	0	0	0	0	0	0	0
NAE1	8883	symbol	H. sapiens	8883	H. sapiens	NAE1	NEDD8 activating enzyme E1 subunit 1	GO:0033314 mitotic DNA replication checkpoint signaling;GO:0000076 DNA replication checkpoint signaling;GO:0045116 protein neddylation		Predicted intracellular proteins	Nucleoplasm (Approved); Additional: Centrosome;Microtubules	ATP			0	1	0	0	0	0	0	0	0	0	0	0	0	0	0	0	1	0	0	0
NASP	4678	symbol	H. sapiens	4678	H. sapiens	NASP	nuclear autoantigenic sperm protein	GO:0034080 CENP-A containing nucleosome assembly;GO:0061641 CENP-A containing chromatin organization;GO:0031055 chromatin remodeling at centromere		Predicted intracellular proteins	Nucleoplasm (Enhanced)			(M5901)HALLMARK G2M CHECKPOINT; (M5925)HALLMARK E2F TARGETS; (M5937)HALLMARK GLYCOLYSIS	0	1	1	0	0	1	0	0	0	0	0	0	0	0	0	0	0	1	0	0
NAV2	89797	symbol	H. sapiens	89797	H. sapiens	NAV2	neuron navigator 2	GO:0021564 vagus nerve development;GO:0003025 regulation of systemic arterial blood pressure by baroreceptor feedback;GO:0021563 glossopharyngeal nerve development		Predicted intracellular proteins; Enzymes; ENZYME proteins:Hydrolases	Nucleoplasm (Supported)			(M5906)HALLMARK ESTROGEN RESPONSE EARLY; (M5909)HALLMARK MYOGENESIS	0	0	1	0	0	0	0	0	0	0	0	0	0	0	0	0	0	0	0	0
NBN	4683	symbol	H. sapiens	4683	H. sapiens	NBN	nibrin	GO:0031860 telomeric 3' overhang formation;GO:0030174 regulation of DNA-dependent DNA replication initiation;GO:1904354 negative regulation of telomere capping		Predicted intracellular proteins; Disease related genes; Cancer-related genes	Golgi apparatus (Approved); Additional: Nucleoplasm		(M258)PID BARD1 PATHWAY; (M84)PID ATM PATHWAY; (M46)PID ATR PATHWAY	(M5935)HALLMARK FATTY ACID METABOLISM; (M5925)HALLMARK E2F TARGETS	1	1	1	0	0	1	1	1	0	0	0	0	0	0	0	0	1	0	0	0
NCAPD2	9918	symbol	H. sapiens	9918	H. sapiens	NCAPD2	non-SMC condensin I complex subunit D2	GO:0010032 meiotic chromosome condensation;GO:0007076 mitotic chromosome condensation;GO:0030261 chromosome condensation		Predicted intracellular proteins	Cytosol (Supported); Additional: Nucleoli;Nucleoplasm		(M14)PID AURORA B PATHWAY	(M5925)HALLMARK E2F TARGETS	1	1	1	0	0	0	1	0	0	0	0	0	0	0	0	0	0	1	0	0
NCAPD3	23310	symbol	H. sapiens	23310	H. sapiens	NCAPD3	non-SMC condensin II complex subunit D3	GO:0010032 meiotic chromosome condensation;GO:0007076 mitotic chromosome condensation;GO:0030261 chromosome condensation		Predicted intracellular proteins	Nucleoplasm (Supported)				1	1	1	0	0	0	1	0	0	0	0	0	0	0	0	0	0	1	0	0
NCAPG	64151	symbol	H. sapiens	64151	H. sapiens	NCAPG	non-SMC condensin I complex subunit G	GO:0007076 mitotic chromosome condensation;GO:0030261 chromosome condensation;GO:0000070 mitotic sister chromatid segregation		Predicted intracellular proteins			(M14)PID AURORA B PATHWAY		1	1	1	0	0	0	0	0	0	0	0	0	0	0	0	0	0	1	0	0
NCAPG2	54892	symbol	H. sapiens	54892	H. sapiens	NCAPG2	non-SMC condensin II complex subunit G2	GO:0001833 inner cell mass cell proliferation;GO:0001832 blastocyst growth;GO:0031063 regulation of histone deacetylation		Predicted intracellular proteins	Nucleoplasm (Supported); Additional: Nuclear speckles				1	1	1	0	0	0	0	0	0	0	0	0	1	0	0	0	0	1	0	0
NCAPH	23397	symbol	H. sapiens	23397	H. sapiens	NCAPH	non-SMC condensin I complex subunit H	GO:0007076 mitotic chromosome condensation;GO:0030261 chromosome condensation;GO:0000070 mitotic sister chromatid segregation		Predicted intracellular proteins	Cytosol (Supported); Additional: Nucleoplasm		(M14)PID AURORA B PATHWAY	(M5951)HALLMARK SPERMATOGENESIS	1	1	1	0	0	0	0	0	0	0	0	0	0	0	0	0	0	1	0	0
NCOA6	23054	symbol	H. sapiens	23054	H. sapiens	NCOA6	nuclear receptor coactivator 6	GO:0006352 DNA-templated transcription, initiation;GO:0030099 myeloid cell differentiation;GO:0007507 heart development		Predicted intracellular proteins	Nucleoplasm (Supported)		(M58)PID AR PATHWAY	(M5916)HALLMARK APICAL SURFACE	0	0	1	0	0	0	0	0	0	0	0	0	0	1	0	0	0	0	0	0
NDC1	55706	symbol	H. sapiens	55706	H. sapiens	NDC1	NDC1 transmembrane nucleoporin	GO:0051664 nuclear pore localization;GO:0051292 nuclear pore complex assembly;GO:0006999 nuclear pore organization		Transporters:Transporter channels and pores	Nuclear membrane (Supported); Additional: Actin filaments;Plasma membrane				1	1	0	0	1	0	1	0	0	0	0	0	0	0	0	0	0	0	0	0
NDC80	10403	symbol	H. sapiens	10403	H. sapiens	NDC80	NDC80 kinetochore complex component	GO:1905340 regulation of protein localization to kinetochore;GO:1905342 positive regulation of protein localization to kinetochore;GO:0090232 positive regulation of spindle checkpoint		Predicted intracellular proteins	Nucleoplasm (Supported); Additional: Centrosome		(M14)PID AURORA B PATHWAY; (M129)PID PLK1 PATHWAY	(M5893)HALLMARK MITOTIC SPINDLE; (M5901)HALLMARK G2M CHECKPOINT	1	1	0	1	0	0	0	0	1	1	1	0	0	0	1	1	0	1	0	0
NDRG1	10397	symbol	H. sapiens	10397	H. sapiens	NDRG1	N-myc downstream regulated 1	GO:0032287 peripheral nervous system myelin maintenance;GO:0043217 myelin maintenance;GO:0022011 myelination in peripheral nervous system		Predicted intracellular proteins; Disease related genes; Cancer-related genes:Candidate cancer biomarkers	Cytosol (Supported); Additional: Microtubules		(M254)PID MYC REPRESS PATHWAY; (M255)PID HIF1 TFPATHWAY; (M145)PID P53 DOWNSTREAM PATHWAY	(M5908)HALLMARK ANDROGEN RESPONSE; (M5947)HALLMARK IL2 STAT5 SIGNALING; (M5891)HALLMARK HYPOXIA	0	0	1	0	0	0	0	0	0	0	0	0	0	0	0	0	1	0	0	0
NEIL3	55247	symbol	H. sapiens	55247	H. sapiens	NEIL3	nei like DNA glycosylase 3	GO:0045007 depurination;GO:0006285 base-excision repair, AP site formation;GO:0036297 interstrand cross-link repair		Predicted intracellular proteins; ENZYME proteins:Lyases; Enzymes	Nucleoplasm (Enhanced)				0	0	1	0	0	0	0	0	0	0	0	0	0	0	0	0	0	0	0	0
NEK1	4750	symbol	H. sapiens	4750	H. sapiens	NEK1	NIMA related kinase 1	GO:0042769 DNA damage response, detection of DNA damage;GO:0060271 cilium assembly;GO:0018108 peptidyl-tyrosine phosphorylation	NEK Ser/Thr protein kinase family	Kinases:NEK Ser/Thr protein kinases; Disease related genes; ENZYME proteins:Transferases; Predicted intracellular proteins; Potential drug targets; Enzymes	Cytosol (Supported); Additional: Centriolar satellite;Nucleoplasm	Fostamatinib	(M10154)SA G2 AND M PHASES		0	1	1	0	0	0	0	0	0	0	0	0	0	0	0	0	0	0	0	0
NEK11	79858	symbol	H. sapiens	79858	H. sapiens	NEK11	NIMA related kinase 11	GO:0031573 mitotic intra-S DNA damage checkpoint signaling;GO:0016572 histone phosphorylation;GO:0044773 mitotic DNA damage checkpoint signaling	NEK Ser/Thr protein kinase family	Predicted intracellular proteins; Kinases:NEK Ser/Thr protein kinases; Enzymes; ENZYME proteins:Transferases	Nucleoplasm (Supported)	Dabrafenib; Fostamatinib			0	1	1	0	0	0	0	0	0	0	0	0	1	0	0	0	1	0	0	0
NEK2	4751	symbol	H. sapiens	4751	H. sapiens	NEK2	NIMA related kinase 2	GO:1903126 negative regulation of centriole-centriole cohesion;GO:0030997 regulation of centriole-centriole cohesion;GO:0046602 regulation of mitotic centrosome separation	NEK Ser/Thr protein kinase family	Kinases:NEK Ser/Thr protein kinases; Disease related genes; ENZYME proteins:Transferases; Predicted intracellular proteins; Potential drug targets; Enzymes	Centrosome;Nucleoplasm (Supported)	5-[(Z)-(5-Chloro-2-oxo-1,2-dihydro-3H-indol-3-ylidene)methyl]-N,2,4-trimethyl-1H-pyrrole-3-carboxamide; Fostamatinib	(M176)PID FOXM1 PATHWAY	(M5951)HALLMARK SPERMATOGENESIS; (M5893)HALLMARK MITOTIC SPINDLE; (M5901)HALLMARK G2M CHECKPOINT	1	1	0	1	0	0	1	0	0	1	0	1	0	1	1	0	0	0	0	0
NEK3	4752	symbol	H. sapiens	4752	H. sapiens	NEK3	NIMA related kinase 3	GO:0090043 regulation of tubulin deacetylation;GO:0090042 tubulin deacetylation;GO:0090311 regulation of protein deacetylation	NEK Ser/Thr protein kinase family	Predicted intracellular proteins; Kinases:NEK Ser/Thr protein kinases; Enzymes; ENZYME proteins:Transferases	Microtubules (Approved)	Fostamatinib			0	1	0	0	0	0	0	0	0	0	0	0	0	0	0	0	0	0	0	0
NEMF	9147	symbol	H. sapiens	9147	H. sapiens	NEMF	nuclear export mediator factor	GO:1990116 ribosome-associated ubiquitin-dependent protein catabolic process;GO:0072344 rescue of stalled ribosome;GO:0006414 translational elongation		Predicted intracellular proteins	Cytosol;Nucleoplasm (Approved); Additional: Nuclear bodies				0	0	0	0	0	0	0	0	0	0	0	0	0	0	0	0	0	0	0	0
NEMP1	23306	symbol	H. sapiens	23306	H. sapiens	NEMP1	nuclear envelope integral membrane protein 1	GO:0071763 nuclear membrane organization;GO:0006998 nuclear envelope organization;GO:0006997 nucleus organization			Nucleoplasm (Approved)				0	0	0	0	0	0	0	0	0	0	0	0	0	0	0	0	0	0	0	0
NEMP2	100131211	symbol	H. sapiens	100131211	H. sapiens	NEMP2	nuclear envelope integral membrane protein 2			Predicted intracellular proteins	Nucleoplasm (Approved)				0	0	0	0	0	0	0	0	0	0	0	0	0	0	0	0	0	0	0	0
NFATC2IP	84901	symbol	H. sapiens	84901	H. sapiens	NFATC2IP	nuclear factor of activated T cells 2 interacting protein	GO:0001816 cytokine production;GO:0045944 positive regulation of transcription by RNA polymerase II;GO:0045893 positive regulation of transcription, DNA-templated		Predicted intracellular proteins	Nucleoplasm (Approved)				0	0	0	0	0	0	0	0	0	0	0	0	0	0	0	0	0	0	0	0
NFYA	4800	symbol	H. sapiens	4800	H. sapiens	NFYA	nuclear transcription factor Y subunit alpha	GO:0048511 rhythmic process;GO:0045893 positive regulation of transcription, DNA-templated;GO:1903508 positive regulation of nucleic acid-templated transcription		Predicted intracellular proteins; Transcription factors:Other all-alpha-helical DNA-binding domains	Nucleoplasm (Supported)		(M254)PID MYC REPRESS PATHWAY; (M145)PID P53 DOWNSTREAM PATHWAY	(M5922)HALLMARK UNFOLDED PROTEIN RESPONSE	0	0	0	0	0	0	0	0	0	0	0	0	0	0	0	0	0	0	0	0
NIF3L1	60491	symbol	H. sapiens	60491	H. sapiens	NIF3L1	NGG1 interacting factor 3 like 1	GO:1903507 negative regulation of nucleic acid-templated transcription;GO:1902679 negative regulation of RNA biosynthetic process;GO:0030182 neuron differentiation		Predicted intracellular proteins	Vesicles (Approved)				0	0	0	0	0	0	0	0	0	0	0	0	0	0	0	0	0	0	0	0
NIFK-AS1	254128	symbol	H. sapiens	254128	H. sapiens	NIFK-AS1	NIFK antisense RNA 1								0	0	0	0	0	0	0	0	0	0	0	0	0	0	0	0	0	0	0	0
NIM1K	167359	symbol	H. sapiens	167359	H. sapiens	NIM1K	NIM1 serine/threonine protein kinase	GO:0042149 cellular response to glucose starvation;GO:0009267 cellular response to starvation;GO:0042594 response to starvation	CAMK Ser/Thr protein kinase family	Kinases:CAMK Ser/Thr protein kinases; Enzymes; ENZYME proteins:Transferases	Cytosol (Approved)	Fostamatinib			0	0	0	0	0	0	0	0	0	0	0	0	0	0	0	0	0	0	0	0
NINJ2	4815	symbol	H. sapiens	4815	H. sapiens	NINJ2	ninjurin 2	GO:0007158 neuron cell-cell adhesion;GO:0042246 tissue regeneration;GO:0031099 regeneration			Endoplasmic reticulum (Approved); Additional: Centriolar satellite;Cytosol;Nucleoplasm;Plasma membrane				0	0	0	0	0	0	0	0	0	0	0	0	0	0	0	0	0	0	0	0
NIPBL	25836	symbol	H. sapiens	25836	H. sapiens	NIPBL	NIPBL cohesin loading factor	GO:0035261 external genitalia morphogenesis;GO:0061780 mitotic cohesin loading;GO:0034087 establishment of mitotic sister chromatid cohesion		Predicted intracellular proteins; Disease related genes	Nucleoplasm (Supported); Additional: Cytosol;Vesicles			(M5942)HALLMARK UV RESPONSE DN	1	1	1	0	0	0	0	0	0	0	0	0	1	0	0	1	0	0	0	1
NKTR	4820	symbol	H. sapiens	4820	H. sapiens	NKTR	natural killer cell triggering receptor	GO:0000413 protein peptidyl-prolyl isomerization;GO:0018208 peptidyl-proline modification;GO:0006457 protein folding		Predicted intracellular proteins; ENZYME proteins:Isomerase; Enzymes	Cytosol;Nucleoplasm;Plasma membrane (Supported)				0	0	0	0	0	0	0	0	0	0	0	0	0	0	0	0	0	0	0	0
NLN	57486	symbol	H. sapiens	57486	H. sapiens	NLN	neurolysin	GO:1902809 regulation of skeletal muscle fiber differentiation;GO:0098528 skeletal muscle fiber differentiation;GO:2001014 regulation of skeletal muscle cell differentiation		Predicted intracellular proteins; Peptidases:Metallopeptidases; Enzymes; ENZYME proteins:Hydrolases	Mitochondria (Approved)				0	0	0	0	0	0	0	0	0	0	0	0	0	0	0	0	0	0	0	0
NOL11	25926	symbol	H. sapiens	25926	H. sapiens	NOL11	nucleolar protein 11	GO:1901838 positive regulation of transcription of nucleolar large rRNA by RNA polymerase I;GO:1901836 regulation of transcription of nucleolar large rRNA by RNA polymerase I;GO:0042790 nucleolar large rRNA transcription by RNA polymerase I		Predicted intracellular proteins	Nucleoli (Supported)				0	0	0	0	1	0	0	0	0	0	0	0	0	0	0	0	0	0	0	0
NOL8	55035	symbol	H. sapiens	55035	H. sapiens	NOL8	nucleolar protein 8	GO:1902570 protein localization to nucleolus;GO:0006364 rRNA processing;GO:0016072 rRNA metabolic process		Predicted intracellular proteins	Nucleoli (Supported); Additional: Mitotic chromosome			(M5939)HALLMARK P53 PATHWAY	0	0	0	0	0	0	0	0	0	0	0	0	0	0	0	0	0	0	0	0
NOSTRIN	115677	symbol	H. sapiens	115677	H. sapiens	NOSTRIN	nitric oxide synthase trafficking	GO:0006897 endocytosis;GO:0045892 negative regulation of transcription, DNA-templated;GO:1903507 negative regulation of nucleic acid-templated transcription		Predicted intracellular proteins	Cytosol (Approved); Additional: Vesicles				0	0	0	0	0	0	0	0	0	0	0	0	0	0	0	0	0	0	0	0
NR2C1	7181	symbol	H. sapiens	7181	H. sapiens	NR2C1	nuclear receptor subfamily 2 group C member 1	GO:0048386 positive regulation of retinoic acid receptor signaling pathway;GO:0048385 regulation of retinoic acid receptor signaling pathway;GO:0048384 retinoic acid receptor signaling pathway		Transcription factors:Zinc-coordinating DNA-binding domains; Predicted intracellular proteins; Nuclear receptors	Nucleoplasm (Supported); Additional: Cell Junctions;Cytosol		(M151)PID AR TF PATHWAY; (M101)PID HDAC CLASSI PATHWAY		0	0	0	0	0	0	0	0	0	0	0	0	0	0	0	0	0	0	0	0
NRD1	4898	gene_synonym	H. sapiens	4898	H. sapiens	NRDC	nardilysin convertase	GO:0051044 positive regulation of membrane protein ectodomain proteolysis;GO:0051043 regulation of membrane protein ectodomain proteolysis;GO:0006509 membrane protein ectodomain proteolysis		Predicted intracellular proteins; Peptidases:Metallopeptidases; Enzymes; ENZYME proteins:Hydrolases	Nucleoplasm (Approved)				0	0	0	0	0	0	0	0	0	0	0	0	0	0	0	0	0	0	0	0
NRF1	4899	symbol	H. sapiens	4899	H. sapiens	NRF1	nuclear respiratory factor 1	GO:0045944 positive regulation of transcription by RNA polymerase II;GO:0045893 positive regulation of transcription, DNA-templated;GO:1903508 positive regulation of nucleic acid-templated transcription		Predicted intracellular proteins; Transcription factors:Yet undefined DNA-binding domains	Nucleoplasm (Supported); Additional: Cytosol				0	0	0	0	0	0	0	0	0	0	0	0	0	1	0	0	0	0	0	0
NRM	11270	symbol	H. sapiens	11270	H. sapiens	NRM	nurim	GO:0008150 biological_process			Nuclear membrane (Enhanced)				0	0	0	0	0	0	0	0	0	0	0	0	0	0	0	0	0	0	0	0
NSUN6	221078	symbol	H. sapiens	221078	H. sapiens	NSUN6	NOP2/Sun RNA methyltransferase 6	GO:0002946 tRNA C5-cytosine methylation;GO:0030488 tRNA methylation;GO:0001510 RNA methylation		Predicted intracellular proteins	Golgi apparatus (Approved)				0	0	0	0	1	0	0	0	0	0	0	0	0	0	0	0	0	0	0	0
NUCB2	4925	symbol	H. sapiens	4925	H. sapiens	NUCB2	nucleobindin 2	GO:0032096 negative regulation of response to food;GO:0032099 negative regulation of appetite;GO:0032105 negative regulation of response to extracellular stimulus		Predicted intracellular proteins; Predicted secreted proteins	Golgi apparatus (Enhanced)	Calcium citrate; Calcium Phosphate; Calcium phosphate dihydrate			0	0	0	0	0	0	0	0	0	0	0	0	0	0	0	0	0	0	0	0
NUDT12	83594	symbol	H. sapiens	83594	H. sapiens	NUDT12	nudix hydrolase 12	GO:0110155 NAD-cap decapping;GO:0019677 NAD catabolic process;GO:0006742 NADP catabolic process		Predicted intracellular proteins; Enzymes; ENZYME proteins:Hydrolases				(M5948)HALLMARK BILE ACID METABOLISM	0	0	0	0	1	0	0	0	0	0	0	0	0	0	0	0	0	0	0	0
NUDT13	25961	symbol	H. sapiens	25961	H. sapiens	NUDT13	nudix hydrolase 13	GO:0006742 NADP catabolic process;GO:0019364 pyridine nucleotide catabolic process;GO:0015949 nucleobase-containing small molecule interconversion		Predicted intracellular proteins	Nucleoplasm (Approved)				0	0	0	0	0	0	0	0	0	0	0	0	0	0	0	0	0	0	0	0
NUDT15	55270	symbol	H. sapiens	55270	H. sapiens	NUDT15	nudix hydrolase 15	GO:0006203 dGTP catabolic process;GO:0046070 dGTP metabolic process;GO:0009217 purine deoxyribonucleoside triphosphate catabolic process		Predicted intracellular proteins; Enzymes; ENZYME proteins:Hydrolases	Nucleoplasm (Supported)			(M5939)HALLMARK P53 PATHWAY	0	0	0	0	0	0	0	0	0	0	0	0	0	0	0	0	0	0	0	0
NUDT21	11051	symbol	H. sapiens	11051	H. sapiens	NUDT21	nudix hydrolase 21	GO:0031437 regulation of mRNA cleavage;GO:0031439 positive regulation of mRNA cleavage;GO:2000975 positive regulation of pro-B cell differentiation		Predicted intracellular proteins	Nuclear bodies (Supported); Additional: Centriolar satellite			(M5898)HALLMARK DNA REPAIR; (M5925)HALLMARK E2F TARGETS	0	0	0	0	1	0	0	0	0	0	0	0	0	0	0	0	0	0	0	0
NUF2	83540	symbol	H. sapiens	83540	H. sapiens	NUF2	NUF2 component of NDC80 kinetochore complex	GO:0051315 attachment of mitotic spindle microtubules to kinetochore;GO:0051383 kinetochore organization;GO:0008608 attachment of spindle microtubules to kinetochore		Predicted intracellular proteins	Nucleoplasm (Supported); Additional: Cytosol;Kinetochore				1	1	0	1	0	0	1	0	0	1	0	0	0	0	0	0	0	0	0	0
NUMB	8650	symbol	H. sapiens	8650	H. sapiens	NUMB	NUMB endocytic adaptor protein	GO:0021849 neuroblast division in subventricular zone;GO:0099149 regulation of postsynaptic neurotransmitter receptor internalization;GO:0021670 lateral ventricle development		Predicted intracellular proteins; Cancer-related genes:Candidate cancer biomarkers	Cell Junctions (Enhanced)		(M17)PID NOTCH PATHWAY; (M48)PID MET PATHWAY	(M5895)HALLMARK WNT BETA CATENIN SIGNALING	0	1	0	0	0	0	0	0	0	0	0	0	0	0	0	0	0	0	0	0
NUP107	57122	symbol	H. sapiens	57122	H. sapiens	NUP107	nucleoporin 107	GO:0000973 posttranscriptional tethering of RNA polymerase II gene DNA at nuclear periphery;GO:0000972 transcription-dependent tethering of RNA polymerase II gene DNA at nuclear periphery;GO:0051292 nuclear pore complex assembly		Potential drug targets; Disease related genes; Transporters:Transporter channels and pores; Predicted intracellular proteins	Nucleoplasm (Uncertain); Additional: Centrosome;Nuclear membrane			(M5925)HALLMARK E2F TARGETS	1	0	0	0	1	0	0	0	0	0	0	0	0	0	0	0	0	0	0	0
NUP133	55746	symbol	H. sapiens	55746	H. sapiens	NUP133	nucleoporin 133	GO:0000972 transcription-dependent tethering of RNA polymerase II gene DNA at nuclear periphery;GO:0006999 nuclear pore organization;GO:0048339 paraxial mesoderm development		Predicted intracellular proteins; Transporters:Transporter channels and pores	Nuclear membrane (Supported)				1	0	0	0	1	0	0	0	0	0	0	0	0	0	0	0	0	0	0	0
NUP160	23279	symbol	H. sapiens	23279	H. sapiens	NUP160	nucleoporin 160	GO:0006406 mRNA export from nucleus;GO:0071427 mRNA-containing ribonucleoprotein complex export from nucleus;GO:0071426 ribonucleoprotein complex export from nucleus		Predicted intracellular proteins; Transporters:Transporter channels and pores					1	0	0	0	1	0	0	0	0	0	0	0	0	0	0	0	0	0	0	0
NUP35	129401	symbol	H. sapiens	129401	H. sapiens	NUP35	nucleoporin 35	GO:0006999 nuclear pore organization;GO:0006607 NLS-bearing protein import into nucleus;GO:1990830 cellular response to leukemia inhibitory factor		Predicted intracellular proteins; Transporters:Transporter channels and pores	Nuclear membrane;Nucleoplasm (Supported); Additional: Plasma membrane				1	0	0	0	1	0	0	0	0	0	0	0	0	0	0	0	0	0	0	0
NUP37	79023	symbol	H. sapiens	79023	H. sapiens	NUP37	nucleoporin 37	GO:0051028 mRNA transport;GO:0050657 nucleic acid transport;GO:0050658 RNA transport		Predicted intracellular proteins; Transporters:Transporter channels and pores	Nucleoplasm (Approved)				1	1	0	0	1	0	0	0	0	0	0	0	0	0	0	0	0	0	0	0
NUP54	53371	symbol	H. sapiens	53371	H. sapiens	NUP54	nucleoporin 54	GO:0036228 protein localization to nuclear inner membrane;GO:0090435 protein localization to nuclear envelope;GO:0006999 nuclear pore organization		Predicted intracellular proteins; Transporters:Transporter channels and pores	Nucleoplasm (Approved)				1	0	0	0	1	0	0	0	0	0	0	0	0	0	0	0	0	0	0	0
NUP85	79902	symbol	H. sapiens	79902	H. sapiens	NUP85	nucleoporin 85	GO:0048246 macrophage chemotaxis;GO:1905517 macrophage migration;GO:0006406 mRNA export from nucleus		Predicted intracellular proteins; Transporters:Transporter channels and pores	Nucleoplasm (Supported); Additional: Cytosol				1	0	0	0	1	0	0	0	0	0	0	0	0	0	0	0	0	0	0	0
NUSAP1	51203	symbol	H. sapiens	51203	H. sapiens	NUSAP1	nucleolar and spindle associated protein 1	GO:0007076 mitotic chromosome condensation;GO:0040001 establishment of mitotic spindle localization;GO:0045840 positive regulation of mitotic nuclear division		Predicted intracellular proteins	Nucleoplasm (Supported); Additional: Nucleoli fibrillar center			(M5893)HALLMARK MITOTIC SPINDLE; (M5901)HALLMARK G2M CHECKPOINT	0	1	1	1	0	0	0	0	1	1	0	1	0	0	0	0	0	1	0	0
NVL	4931	symbol	H. sapiens	4931	H. sapiens	NVL	nuclear VCP like	GO:1904749 regulation of protein localization to nucleolus;GO:1902570 protein localization to nucleolus;GO:0051973 positive regulation of telomerase activity		Predicted intracellular proteins	Nucleoli (Enhanced)				0	0	0	0	0	0	0	0	0	0	0	0	0	0	0	0	0	0	0	0
OARD1	221443	symbol	H. sapiens	221443	H. sapiens	OARD1	O-acyl-ADP-ribose deacylase 1	GO:0140291 peptidyl-glutamate ADP-deribosylation;GO:0051725 protein de-ADP-ribosylation;GO:0042278 purine nucleoside metabolic process		Predicted intracellular proteins	Nucleoli (Supported); Additional: Nucleoplasm				0	0	1	0	0	0	0	0	0	0	0	0	0	0	0	0	0	0	0	0
OCRL	4952	symbol	H. sapiens	4952	H. sapiens	OCRL	OCRL inositol polyphosphate-5-phosphatase	GO:0036092 phosphatidylinositol-3-phosphate biosynthetic process;GO:0046855 inositol phosphate dephosphorylation;GO:0046838 phosphorylated carbohydrate dephosphorylation		Disease related genes; Predicted intracellular proteins; Potential drug targets; ENZYME proteins:Hydrolases; Enzymes	Cytosol (Approved); Additional: Centriolar satellite;Microtubules			(M5910)HALLMARK PROTEIN SECRETION	1	0	0	0	0	0	0	0	0	0	0	0	0	0	0	0	0	0	0	0
ODF2	4957	symbol	H. sapiens	4957	H. sapiens	ODF2	outer dense fiber of sperm tails 2	GO:0010457 centriole-centriole cohesion;GO:0007098 centrosome cycle;GO:0031023 microtubule organizing center organization		Predicted intracellular proteins	Centrosome (Supported)		(M129)PID PLK1 PATHWAY	(M5901)HALLMARK G2M CHECKPOINT	1	0	0	1	0	0	0	0	0	0	1	0	0	1	1	0	0	0	0	0
ORC1	4998	symbol	H. sapiens	4998	H. sapiens	ORC1	origin recognition complex subunit 1	GO:0033314 mitotic DNA replication checkpoint signaling;GO:0000076 DNA replication checkpoint signaling;GO:0006270 DNA replication initiation		Predicted intracellular proteins; Disease related genes	Nucleoplasm (Supported)		(M40)PID E2F PATHWAY		1	1	1	0	0	1	0	1	0	0	0	1	0	0	0	0	1	0	0	0
ORC2	4999	symbol	H. sapiens	4999	H. sapiens	ORC2	origin recognition complex subunit 2	GO:0006270 DNA replication initiation;GO:0006261 DNA-dependent DNA replication;GO:0006260 DNA replication		Predicted intracellular proteins	Nucleoplasm (Supported); Additional: Cytosol			(M5925)HALLMARK E2F TARGETS; (M5926)HALLMARK MYC TARGETS V1	1	0	1	0	0	1	0	1	0	0	0	1	0	0	0	0	0	0	0	0
ORC3	23595	symbol	H. sapiens	23595	H. sapiens	ORC3	origin recognition complex subunit 3	GO:0006270 DNA replication initiation;GO:0006275 regulation of DNA replication;GO:0061351 neural precursor cell proliferation		Predicted intracellular proteins	Nucleoplasm (Supported)				1	0	1	0	0	1	0	1	0	0	0	1	0	0	0	0	0	0	0	0
OSGEPL1	64172	symbol	H. sapiens	64172	H. sapiens	OSGEPL1	O-sialoglycoprotein endopeptidase like 1	GO:0002949 tRNA threonylcarbamoyladenosine modification;GO:0070525 tRNA threonylcarbamoyladenosine metabolic process;GO:0006400 tRNA modification		Predicted intracellular proteins; Enzymes; ENZYME proteins:Transferases	Mitochondria (Supported)				0	0	0	0	0	0	0	0	0	0	0	0	0	0	0	0	0	0	0	0
OTUD6B-AS1	100506365	symbol	H. sapiens	100506365	H. sapiens	OTUD6B-AS1	OTUD6B antisense RNA 1 (head to head)								0	0	0	0	0	0	0	0	0	0	0	0	0	0	0	0	0	0	0	0
P4HA2-AS1	100861518	symbol	H. sapiens	100861518	H. sapiens	P4HA2-AS1	P4HA2 antisense RNA 1								0	0	0	0	0	0	0	0	0	0	0	0	0	0	0	0	0	0	0	0
PAICS	10606	symbol	H. sapiens	10606	H. sapiens	PAICS	phosphoribosylaminoimidazole carboxylase and phosphoribosylaminoimidazolesuccinocarboxamide synthase	GO:0006189 'de novo' IMP biosynthetic process;GO:0009113 purine nucleobase biosynthetic process;GO:0006188 IMP biosynthetic process		Predicted intracellular proteins; ENZYME proteins:Lyases; ENZYME proteins:Ligase; Enzymes	Cytosol (Approved)	Aspartic acid		(M5925)HALLMARK E2F TARGETS	0	0	0	0	0	0	0	0	0	0	0	0	0	0	0	0	0	0	0	0
PAK1	5058	symbol	H. sapiens	5058	H. sapiens	PAK1	p21 (RAC1) activated kinase 1	GO:0060244 negative regulation of cell proliferation involved in contact inhibition;GO:0090063 positive regulation of microtubule nucleation;GO:0060242 contact inhibition	STE Ser/Thr protein kinase family	Kinases:STE Ser/Thr protein kinases; ENZYME proteins:Transferases; Predicted intracellular proteins; RAS pathway related proteins; Enzymes	Cytosol;Plasma membrane (Supported)	Fostamatinib	(M273)PID EPHA2 FWD PATHWAY; (M268)PID S1P S1P2 PATHWAY; (M76)PID P38 ALPHA BETA PATHWAY	(M5902)HALLMARK APOPTOSIS	1	0	1	1	0	0	0	0	0	0	1	0	0	0	0	0	0	0	0	0
PALB2	79728	symbol	H. sapiens	79728	H. sapiens	PALB2	partner and localizer of BRCA2	GO:0001833 inner cell mass cell proliferation;GO:0036342 post-anal tail morphogenesis;GO:0001832 blastocyst growth		Predicted intracellular proteins; Disease related genes; Cancer-related genes	Nucleoplasm (Supported)		(M1)PID FANCONI PATHWAY		0	0	1	0	0	0	0	0	0	0	0	0	0	0	0	0	0	0	0	0
PAN2	9924	symbol	H. sapiens	9924	H. sapiens	PAN2	poly(A) specific ribonuclease subunit PAN2	GO:0010606 positive regulation of cytoplasmic mRNA processing body assembly;GO:0010603 regulation of cytoplasmic mRNA processing body assembly;GO:0033962 P-body assembly		Predicted intracellular proteins; Peptidases:Cysteine-type peptidases; Enzymes; ENZYME proteins:Hydrolases				(M5925)HALLMARK E2F TARGETS	0	0	0	1	1	0	0	0	0	0	0	0	0	0	0	0	0	0	0	0
PAPD7	11044	gene_synonym	H. sapiens	11044	H. sapiens	TENT4A	terminal nucleotidyltransferase 4A	GO:0060212 negative regulation of nuclear-transcribed mRNA poly(A) tail shortening;GO:1900152 negative regulation of nuclear-transcribed mRNA catabolic process, deadenylation-dependent decay;GO:1905870 positive regulation of 3'-UTR-mediated mRNA stabilization		Predicted intracellular proteins; Enzymes; ENZYME proteins:Transferases	Nucleoplasm (Supported); Additional: Golgi apparatus;Nuclear membrane			(M5942)HALLMARK UV RESPONSE DN; (M5901)HALLMARK G2M CHECKPOINT	0	1	1	0	1	0	0	0	0	0	0	0	0	0	0	0	0	1	0	1
PAPOLA	10914	symbol	H. sapiens	10914	H. sapiens	PAPOLA	poly(A) polymerase alpha	GO:0031440 regulation of mRNA 3'-end processing;GO:0006378 mRNA polyadenylation;GO:0043631 RNA polyadenylation		Predicted intracellular proteins; Enzymes; ENZYME proteins:Transferases	Nucleoplasm (Supported)	Cordycepin Triphosphate; 3-sulfino-L-alanine; Triphosphoric acid			0	0	0	0	1	0	0	0	0	0	0	0	0	0	0	0	0	0	0	0
PAQR5	54852	symbol	H. sapiens	54852	H. sapiens	PAQR5	progestin and adipoQ receptor family member 5	GO:0048477 oogenesis;GO:0007292 female gamete generation;GO:0007281 germ cell development			Vesicles (Approved)				0	0	0	0	0	0	0	0	0	0	0	0	0	0	0	0	0	0	0	0
PARP11	57097	symbol	H. sapiens	57097	H. sapiens	PARP11	poly(ADP-ribose) polymerase family member 11	GO:0070213 protein auto-ADP-ribosylation;GO:0140289 protein mono-ADP-ribosylation;GO:0006471 protein ADP-ribosylation		Predicted intracellular proteins; Enzymes; ENZYME proteins:Transferases	Nuclear bodies (Supported); Additional: Cytosol;Nucleoplasm				0	0	0	0	0	0	0	0	0	0	0	0	0	0	0	0	0	0	0	0
PARP2	10038	symbol	H. sapiens	10038	H. sapiens	PARP2	poly(ADP-ribose) polymerase 2	GO:0018312 peptidyl-serine ADP-ribosylation;GO:0030592 DNA ADP-ribosylation;GO:0070212 protein poly-ADP-ribosylation		FDA approved drug targets:Small molecule drugs; Predicted intracellular proteins; Enzymes; ENZYME proteins:Transferases	Nucleoplasm (Supported); Additional: Nucleoli	Veliparib; Olaparib; Talazoparib; Niraparib; Rucaparib	(M105)PID TELOMERASE PATHWAY	(M5951)HALLMARK SPERMATOGENESIS; (M5941)HALLMARK UV RESPONSE UP	0	0	1	0	0	0	0	0	0	0	0	0	1	0	0	0	0	0	0	0
PARP4	143	symbol	H. sapiens	143	H. sapiens	PARP4	poly(ADP-ribose) polymerase family member 4	GO:0140289 protein mono-ADP-ribosylation;GO:0006471 protein ADP-ribosylation;GO:0051972 regulation of telomerase activity		Predicted intracellular proteins; Enzymes; ENZYME proteins:Transferases	Cytosol (Supported)				0	0	1	0	0	0	0	0	0	0	0	0	0	0	0	0	0	0	0	0
PARP6	56965	symbol	H. sapiens	56965	H. sapiens	PARP6	poly(ADP-ribose) polymerase family member 6	GO:0070213 protein auto-ADP-ribosylation;GO:0140289 protein mono-ADP-ribosylation;GO:0006471 protein ADP-ribosylation		Predicted intracellular proteins; Enzymes; ENZYME proteins:Transferases	Plasma membrane (Approved)				0	0	0	0	0	0	0	0	0	0	0	0	0	0	0	0	0	0	0	0
PARPBP	55010	symbol	H. sapiens	55010	H. sapiens	PARPBP	PARP1 binding protein	GO:2000042 negative regulation of double-strand break repair via homologous recombination;GO:2000780 negative regulation of double-strand break repair;GO:0045738 negative regulation of DNA repair		Predicted intracellular proteins	Nucleoplasm (Supported)				0	0	1	0	0	0	0	0	0	0	0	0	0	0	0	0	0	0	0	0
PATL1	219988	symbol	H. sapiens	219988	H. sapiens	PATL1	PAT1 homolog 1, processing body mRNA decay factor	GO:0000290 deadenylation-dependent decapping of nuclear-transcribed mRNA;GO:0110156 methylguanosine-cap decapping;GO:0110154 RNA decapping		Predicted intracellular proteins	Cytoplasmic bodies (Supported)				0	0	0	1	1	0	0	0	0	0	0	0	0	0	0	0	0	0	0	0
PAXBP1	94104	symbol	H. sapiens	94104	H. sapiens	PAXBP1	PAX3 and PAX7 binding protein 1	GO:2000288 positive regulation of myoblast proliferation;GO:0014842 regulation of skeletal muscle satellite cell proliferation;GO:0014841 skeletal muscle satellite cell proliferation		Predicted intracellular proteins	Nucleoplasm (Approved); Additional: Cytosol				0	0	0	0	1	0	0	0	0	0	0	0	1	0	0	0	0	0	0	0
PAXIP1	22976	symbol	H. sapiens	22976	H. sapiens	PAXIP1	PAX interacting protein 1	GO:0000416 positive regulation of histone H3-K36 methylation;GO:0000414 regulation of histone H3-K36 methylation;GO:0060717 chorion development		Predicted intracellular proteins	Nucleoplasm;Vesicles (Approved)			(M5937)HALLMARK GLYCOLYSIS	0	1	1	0	0	0	0	0	0	0	0	0	1	0	0	0	1	0	0	0
PBK	55872	symbol	H. sapiens	55872	H. sapiens	PBK	PDZ binding kinase	GO:0032435 negative regulation of proteasomal ubiquitin-dependent protein catabolic process;GO:2000059 negative regulation of ubiquitin-dependent protein catabolic process;GO:1901799 negative regulation of proteasomal protein catabolic process	STE Ser/Thr protein kinase family	Kinases:STE Ser/Thr protein kinases; Predicted intracellular proteins; Enzymes; ENZYME proteins:Transferases	Cytosol (Approved)			(M5901)HALLMARK G2M CHECKPOINT	0	0	0	0	0	0	0	0	0	0	0	0	0	0	0	0	0	0	0	0
PBRM1	55193	symbol	H. sapiens	55193	H. sapiens	PBRM1	polybromo 1	GO:0006338 chromatin remodeling;GO:0006325 chromatin organization;GO:0008285 negative regulation of cell population proliferation		Disease related genes; Predicted intracellular proteins; Cancer-related genes:Mutational cancer driver genes; Cancer-related genes:Mutated cancer genes; Transcription factors:Other all-alpha-helical DNA-binding domains	Nucleoplasm (Enhanced)				0	0	0	0	0	0	0	0	0	0	0	0	1	0	0	0	0	0	0	0
PCNA	5111	symbol	H. sapiens	5111	H. sapiens	PCNA	proliferating cell nuclear antigen	GO:1902990 mitotic telomere maintenance via semi-conservative replication;GO:0006272 leading strand elongation;GO:0032077 positive regulation of deoxyribonuclease activity		Predicted intracellular proteins; Disease related genes; Cancer-related genes:Candidate cancer biomarkers	Nucleoplasm (Enhanced)	Liothyronine; Acetylsalicylic acid	(M258)PID BARD1 PATHWAY; (M200)PID ERA GENOMIC PATHWAY; (M145)PID P53 DOWNSTREAM PATHWAY	(M5898)HALLMARK DNA REPAIR; (M5925)HALLMARK E2F TARGETS; (M5926)HALLMARK MYC TARGETS V1	1	1	1	0	0	1	0	1	0	0	0	1	0	0	0	0	0	0	1	0
PCNXL4	64430	gene_synonym	H. sapiens	64430	H. sapiens	PCNX4	pecanex 4			Predicted intracellular proteins	Cytosol (Approved)				0	0	0	0	0	0	0	0	0	0	0	0	0	0	0	0	0	0	0	0
PDE4C	5143	symbol	H. sapiens	5143	H. sapiens	PDE4C	phosphodiesterase 4C	GO:0006198 cAMP catabolic process;GO:0009214 cyclic nucleotide catabolic process;GO:0046058 cAMP metabolic process		FDA approved drug targets:Small molecule drugs; Predicted intracellular proteins; Enzymes; ENZYME proteins:Hydrolases	Centrosome;Cytosol (Approved); Additional: Midbody ring	Dyphylline; Iloprost; Roflumilast; Piclamilast; Crisaborole; Ibudilast; Exisulind			0	0	0	0	0	0	0	0	0	0	0	0	0	0	0	0	0	0	0	0
PDIA3	2923	symbol	H. sapiens	2923	H. sapiens	PDIA3	protein disulfide isomerase family A member 3	GO:0034975 protein folding in endoplasmic reticulum;GO:0098760 response to interleukin-7;GO:0098761 cellular response to interleukin-7		Predicted intracellular proteins; ENZYME proteins:Isomerase; Enzymes	Endoplasmic reticulum (Enhanced)	Zinc; Copper; Zinc acetate; Zinc chloride; Zinc sulfate, unspecified form			0	0	0	0	0	0	0	0	0	0	0	1	0	0	0	0	0	0	0	1
PDK1	5163	symbol	H. sapiens	5163	H. sapiens	PDK1	pyruvate dehydrogenase kinase 1	GO:0010510 regulation of acetyl-CoA biosynthetic process from pyruvate;GO:0050812 regulation of acyl-CoA biosynthetic process;GO:0097411 hypoxia-inducible factor-1alpha signaling pathway	Atypical: PDK/BCKDK protein kinase family	ENZYME proteins:Transferases; Predicted intracellular proteins; Kinases:Atypical kinases; FDA approved drug targets:Small molecule drugs; Enzymes		4-[(3-CHLORO-4-{[(2R)-3,3,3-TRIFLUORO-2-HYDROXY-2-METHYLPROPANOYL]AMINO}PHENYL)SULFONYL]-N,N-DIMETHYLBENZAMIDE; Dichloroacetic acid		(M5923)HALLMARK PI3K AKT MTOR SIGNALING; (M5891)HALLMARK HYPOXIA; (M5924)HALLMARK MTORC1 SIGNALING	0	0	0	0	0	0	0	0	0	0	0	0	0	0	0	0	0	0	0	0
PDS5B	23047	symbol	H. sapiens	23047	H. sapiens	PDS5B	PDS5 cohesin associated factor B	GO:0007064 mitotic sister chromatid cohesion;GO:0007062 sister chromatid cohesion;GO:0000070 mitotic sister chromatid segregation		Predicted intracellular proteins	Nucleoplasm (Enhanced)			(M5901)HALLMARK G2M CHECKPOINT; (M5925)HALLMARK E2F TARGETS	1	1	1	0	0	0	0	1	0	0	0	0	0	0	0	0	0	0	0	1
PDZD11	51248	symbol	H. sapiens	51248	H. sapiens	PDZD11	PDZ domain containing 11	GO:1903361 protein localization to basolateral plasma membrane;GO:0035090 maintenance of apical/basal cell polarity;GO:0045199 maintenance of epithelial cell apical/basal polarity		Predicted intracellular proteins					0	0	0	0	0	0	0	0	0	0	0	0	0	0	0	0	0	0	0	0
PER3	8863	symbol	H. sapiens	8863	H. sapiens	PER3	period circadian regulator 3	GO:0045187 regulation of circadian sleep/wake cycle, sleep;GO:0050802 circadian sleep/wake cycle, sleep;GO:0042749 regulation of circadian sleep/wake cycle		Predicted intracellular proteins; Disease related genes	Cytosol (Supported)				0	0	0	0	0	0	0	0	0	0	0	0	0	0	0	0	0	0	0	0
PERM1	84808	symbol	H. sapiens	84808	H. sapiens	PERM1	PPARGC1 and ESRR induced regulator, muscle 1	GO:0014850 response to muscle activity;GO:0014823 response to activity;GO:0006355 regulation of transcription, DNA-templated		Predicted intracellular proteins					0	0	0	0	0	0	0	0	0	0	0	0	0	1	0	0	0	0	0	0
PFKFB4	5210	symbol	H. sapiens	5210	H. sapiens	PFKFB4	6-phosphofructo-2-kinase/fructose-2,6-biphosphatase 4	GO:0006003 fructose 2,6-bisphosphate metabolic process;GO:0006000 fructose metabolic process;GO:0046835 carbohydrate phosphorylation		Predicted intracellular proteins; Enzymes; ENZYME proteins:Hydrolases; ENZYME proteins:Transferases	Nucleoli (Approved)	Phosphoaminophosphonic Acid-Adenylate Ester; Fructose-6-phosphate			0	0	0	0	0	0	0	0	0	0	0	0	0	0	0	0	0	0	0	0
PGBD1	84547	symbol	H. sapiens	84547	H. sapiens	PGBD1	piggyBac transposable element derived 1	GO:0006897 endocytosis;GO:0016192 vesicle-mediated transport;GO:0006357 regulation of transcription by RNA polymerase II		Predicted intracellular proteins	Nucleoplasm (Approved); Additional: Cytosol				0	0	0	0	0	0	0	0	0	0	0	0	0	0	0	0	0	0	0	0
PGK1	5230	symbol	H. sapiens	5230	H. sapiens	PGK1	phosphoglycerate kinase 1	GO:0031639 plasminogen activation;GO:0031638 zymogen activation;GO:0006094 gluconeogenesis		Disease related genes; ENZYME proteins:Transferases; Predicted intracellular proteins; Potential drug targets; Enzymes		Adenosine-5'-[Beta, Gamma-Methylene]Triphosphate; 3-phospho-D-glyceric acid; Copper; Artenimol	(M44)PID HIF2PATHWAY; (M255)PID HIF1 TFPATHWAY	(M5891)HALLMARK HYPOXIA; (M5924)HALLMARK MTORC1 SIGNALING; (M5926)HALLMARK MYC TARGETS V1	0	0	0	0	0	0	0	0	0	0	0	0	0	0	0	0	0	0	0	0
PHACTR4	65979	symbol	H. sapiens	65979	H. sapiens	PHACTR4	phosphatase and actin regulator 4	GO:0061386 closure of optic fissure;GO:2001045 negative regulation of integrin-mediated signaling pathway;GO:0002072 optic cup morphogenesis involved in camera-type eye development		Predicted intracellular proteins	Cytosol;Plasma membrane (Approved); Additional: Intermediate filaments				0	0	0	0	0	0	0	0	0	0	0	0	0	0	0	0	0	0	0	0
PHYHD1	254295	symbol	H. sapiens	254295	H. sapiens	PHYHD1	phytanoyl-CoA dioxygenase domain containing 1			Predicted intracellular proteins	Nuclear speckles (Approved)				0	0	0	0	0	0	0	0	0	0	0	0	0	0	0	0	0	0	0	0
PIAS1	8554	symbol	H. sapiens	8554	H. sapiens	PIAS1	protein inhibitor of activated STAT 1	GO:0033235 positive regulation of protein sumoylation;GO:0051152 positive regulation of smooth muscle cell differentiation;GO:0033233 regulation of protein sumoylation		Predicted intracellular proteins	Microtubules (Approved)		(M140)PID RANBP2 PATHWAY; (M161)PID IFNG PATHWAY; (M91)PID TCPTP PATHWAY	(M5908)HALLMARK ANDROGEN RESPONSE	0	1	1	0	0	0	0	0	0	0	0	1	1	0	0	0	0	0	0	0
PIBF1	10464	symbol	H. sapiens	10464	H. sapiens	PIBF1	progesterone immunomodulatory binding factor 1	GO:0031393 negative regulation of prostaglandin biosynthetic process;GO:0032815 negative regulation of natural killer cell activation;GO:0031392 regulation of prostaglandin biosynthetic process		Predicted intracellular proteins; Predicted secreted proteins	Centriolar satellite (Supported)				0	1	0	1	0	0	0	0	0	1	0	0	0	0	0	0	0	0	0	0
PIGC	5279	symbol	H. sapiens	5279	H. sapiens	PIGC	phosphatidylinositol glycan anchor biosynthesis class C	GO:0006506 GPI anchor biosynthetic process;GO:0006505 GPI anchor metabolic process;GO:0009247 glycolipid biosynthetic process		Enzymes; ENZYME proteins:Transferases					0	0	0	0	0	0	0	0	0	0	0	0	0	0	0	0	0	0	0	0
PIGW	284098	symbol	H. sapiens	284098	H. sapiens	PIGW	phosphatidylinositol glycan anchor biosynthesis class W	GO:0016254 preassembly of GPI anchor in ER membrane;GO:0006506 GPI anchor biosynthetic process;GO:0006505 GPI anchor metabolic process		Disease related genes	Plasma membrane (Approved)				0	0	0	0	0	0	0	0	0	0	0	0	0	0	0	0	0	0	0	0
PIK3CD-AS2	101929074	symbol	H. sapiens	101929074	H. sapiens	PIK3CD-AS2	PIK3CD antisense RNA 2								0	0	0	0	0	0	0	0	0	0	0	0	0	0	0	0	0	0	0	0
PIK3R4	30849	symbol	H. sapiens	30849	H. sapiens	PIK3R4	phosphoinositide-3-kinase regulatory subunit 4	GO:0030242 autophagy of peroxisome;GO:0045324 late endosome to vacuole transport;GO:0032801 receptor catabolic process	Other	Predicted intracellular proteins; Enzymes; Kinases; ENZYME proteins:Transferases	Vesicles (Approved); Additional: Microtubules				1	1	0	0	0	0	0	0	0	0	0	0	0	0	0	0	0	0	0	0
PINLYP	390940	symbol	H. sapiens	390940	H. sapiens	PINLYP	phospholipase A2 inhibitor and LY6/PLAUR domain containing	GO:0043086 negative regulation of catalytic activity;GO:0044092 negative regulation of molecular function;GO:0050790 regulation of catalytic activity		Predicted intracellular proteins; Predicted secreted proteins	Vesicles (Approved)				0	0	0	0	0	0	0	0	0	0	0	0	0	0	0	0	0	0	0	0
PIWIL2	55124	symbol	H. sapiens	55124	H. sapiens	PIWIL2	piwi like RNA-mediated gene silencing 2	GO:0060903 positive regulation of meiosis I;GO:0030718 germ-line stem cell population maintenance;GO:0071442 positive regulation of histone H3-K14 acetylation		Predicted intracellular proteins					0	1	0	0	0	0	1	0	1	0	0	1	1	0	0	0	0	0	0	0
PKN2	5586	symbol	H. sapiens	5586	H. sapiens	PKN2	protein kinase N2	GO:0045070 positive regulation of viral genome replication;GO:0032467 positive regulation of cytokinesis;GO:0048524 positive regulation of viral process	AGC Ser/Thr protein kinase family	Kinases:AGC Ser/Thr protein kinases; Predicted intracellular proteins; Enzymes; ENZYME proteins:Transferases	Intermediate filaments;Nucleoplasm (Supported); Additional: Centrosome;Cytosol;Nuclear bodies;Plasma membrane	Fostamatinib	(M12)PID RHOA PATHWAY		1	1	0	0	0	0	0	0	1	0	0	0	0	0	0	0	0	0	0	0
PLAGL2	5326	symbol	H. sapiens	5326	H. sapiens	PLAGL2	PLAG1 like zinc finger 2	GO:0034378 chylomicron assembly;GO:0034377 plasma lipoprotein particle assembly;GO:0065005 protein-lipid complex assembly		Transcription factors:Zinc-coordinating DNA-binding domains; Predicted intracellular proteins	Nucleoplasm (Approved); Additional: Cytosol				0	0	0	0	0	0	0	0	0	0	0	0	0	0	0	0	0	0	0	0
PLEKHA7	144100	symbol	H. sapiens	144100	H. sapiens	PLEKHA7	pleckstrin homology domain containing A7	GO:0045218 zonula adherens maintenance;GO:0034334 adherens junction maintenance;GO:0045217 cell-cell junction maintenance		Predicted intracellular proteins	Cell Junctions;Nucleoplasm (Enhanced); Additional: Cytosol		(M232)PID ECADHERIN STABILIZATION PATHWAY		0	0	0	0	0	0	0	0	0	0	0	0	0	0	0	0	0	0	0	0
PLK1	5347	symbol	H. sapiens	5347	H. sapiens	PLK1	polo like kinase 1	GO:0070194 synaptonemal complex disassembly;GO:1905784 regulation of anaphase-promoting complex-dependent catabolic process;GO:0016321 female meiosis chromosome segregation	Other	Disease related genes; ENZYME proteins:Transferases; Predicted intracellular proteins; Potential drug targets; Cancer-related genes:Candidate cancer biomarkers; Enzymes; Kinases		3-[3-chloro-5-(5-{[(1S)-1-phenylethyl]amino}isoxazolo[5,4-c]pyridin-3-yl)phenyl]propan-1-ol; 3-[3-(3-methyl-6-{[(1S)-1-phenylethyl]amino}-1H-pyrazolo[4,3-c]pyridin-1-yl)phenyl]propanamide; 4-(4-METHYLPIPERAZIN-1-YL)-N-[5-(2-THIENYLACETYL)-1,5-DIHYDROPYRROLO[3,4-C]PYRAZOL-3-YL]BENZAMIDE; 1-[5-Methyl-2-(trifluoromethyl)furan-3-yl]-3-[5-[2-[[6-(1H-1,2,4-triazol-5-ylamino)pyrimidin-4-yl]amino]ethyl]-…	(M46)PID ATR PATHWAY; (M176)PID FOXM1 PATHWAY; (M129)PID PLK1 PATHWAY	(M5928)HALLMARK MYC TARGETS V2; (M5893)HALLMARK MITOTIC SPINDLE; (M5901)HALLMARK G2M CHECKPOINT	1	1	1	1	0	0	1	0	0	1	1	1	0	1	1	1	1	1	0	1
PLK4	10733	symbol	H. sapiens	10733	H. sapiens	PLK4	polo like kinase 4	GO:0097742 de novo centriole assembly;GO:0098535 de novo centriole assembly involved in multi-ciliated epithelial cell differentiation;GO:0046601 positive regulation of centriole replication	Other	Disease related genes; ENZYME proteins:Transferases; Predicted intracellular proteins; Potential drug targets; Enzymes; Kinases	Centrosome;Cytosol (Supported)	Fostamatinib		(M5928)HALLMARK MYC TARGETS V2; (M5901)HALLMARK G2M CHECKPOINT; (M5907)HALLMARK ESTROGEN RESPONSE LATE	1	1	0	1	0	0	0	1	1	0	0	0	0	1	1	0	0	0	0	0
PMP22	5376	symbol	H. sapiens	5376	H. sapiens	PMP22	peripheral myelin protein 22	GO:0032060 bleb assembly;GO:0032288 myelin assembly;GO:0007422 peripheral nervous system development		Disease related genes; Predicted intracellular proteins; Transporters:Transporter channels and pores; Potential drug targets; Cancer-related genes:Candidate cancer biomarkers			(M239)PID A6B1 A6B4 INTEGRIN PATHWAY	(M5942)HALLMARK UV RESPONSE DN; (M5930)HALLMARK EPITHELIAL MESENCHYMAL TRANSITION	0	1	0	0	0	0	0	0	0	0	0	0	0	0	0	0	0	0	0	0
PNISR	25957	symbol	H. sapiens	25957	H. sapiens	PNISR	PNN interacting serine and arginine rich protein			Predicted intracellular proteins	Nuclear speckles (Supported); Additional: Cytosol;Plasma membrane				0	0	0	0	0	0	0	0	0	0	0	0	0	0	0	0	0	0	0	0
PNN	5411	symbol	H. sapiens	5411	H. sapiens	PNN	pinin, desmosome associated protein	GO:0000377 RNA splicing, via transesterification reactions with bulged adenosine as nucleophile;GO:0000398 mRNA splicing, via spliceosome;GO:0000375 RNA splicing, via transesterification reactions		Transporters:Primary Active Transporters; Predicted intracellular proteins	Nuclear speckles (Supported)			(M5925)HALLMARK E2F TARGETS	0	0	0	0	1	0	0	0	0	0	0	0	0	0	0	0	0	0	0	0
POC1A	25886	symbol	H. sapiens	25886	H. sapiens	POC1A	POC1 centriolar protein A	GO:0030030 cell projection organization;GO:0016043 cellular component organization;GO:0071840 cellular component organization or biogenesis		Predicted intracellular proteins; Disease related genes					0	0	0	0	0	0	0	0	0	0	0	0	0	0	0	0	0	0	0	0
POC5	134359	symbol	H. sapiens	134359	H. sapiens	POC5	POC5 centriolar protein	GO:0007049 cell cycle;GO:0009987 cellular process;GO:0008150 biological_process		Predicted intracellular proteins	Nucleoplasm (Enhanced)				0	0	0	0	0	0	0	0	0	0	0	0	0	0	0	0	0	0	0	0
POGZ	23126	symbol	H. sapiens	23126	H. sapiens	POGZ	pogo transposable element derived with ZNF domain	GO:0051382 kinetochore assembly;GO:0051383 kinetochore organization;GO:0007064 mitotic sister chromatid cohesion		Transcription factors:Zinc-coordinating DNA-binding domains; Predicted intracellular proteins; Disease related genes	Nucleoplasm (Enhanced)				0	1	0	1	0	0	0	0	0	0	0	0	0	0	0	0	0	0	0	1
POLD3	10714	symbol	H. sapiens	10714	H. sapiens	POLD3	DNA polymerase delta 3, accessory subunit	GO:1904161 DNA synthesis involved in UV-damage excision repair;GO:0006297 nucleotide-excision repair, DNA gap filling;GO:0070914 UV-damage excision repair		Predicted intracellular proteins	Nucleoplasm (Supported)			(M5898)HALLMARK DNA REPAIR; (M5925)HALLMARK E2F TARGETS	1	0	1	0	0	1	0	1	0	0	0	0	0	0	0	0	0	0	1	0
POLE2	5427	symbol	H. sapiens	5427	H. sapiens	POLE2	DNA polymerase epsilon 2, accessory subunit	GO:0042276 error-prone translesion synthesis;GO:0019985 translesion synthesis;GO:0006301 postreplication repair		FDA approved drug targets:Small molecule drugs; Predicted intracellular proteins; Enzymes; ENZYME proteins:Transferases	Nuclear bodies;Nucleoplasm (Supported); Additional: Vesicles	Cladribine			1	0	1	0	0	1	0	1	0	0	0	0	0	0	0	0	0	0	0	0
POLE3	54107	symbol	H. sapiens	54107	H. sapiens	POLE3	DNA polymerase epsilon 3, accessory subunit	GO:0042766 nucleosome mobilization;GO:0006272 leading strand elongation;GO:0006271 DNA strand elongation involved in DNA replication		FDA approved drug targets:Small molecule drugs; Predicted intracellular proteins; Enzymes; ENZYME proteins:Transferases	Nucleoli;Nucleoplasm (Approved)	Cladribine		(M5941)HALLMARK UV RESPONSE UP; (M5926)HALLMARK MYC TARGETS V1	1	0	1	0	0	1	0	1	0	0	0	0	1	0	0	0	0	0	0	0
POLQ	10721	symbol	H. sapiens	10721	H. sapiens	POLQ	DNA polymerase theta	GO:0097681 double-strand break repair via alternative nonhomologous end joining;GO:0016446 somatic hypermutation of immunoglobulin genes;GO:0002566 somatic diversification of immune receptors via somatic mutation		Disease related genes; ENZYME proteins:Transferases; Predicted intracellular proteins; Potential drug targets; Enzymes; Cancer-related genes	Nucleoplasm (Supported); Additional: Cytosol;Golgi apparatus			(M5901)HALLMARK G2M CHECKPOINT	0	0	1	0	0	1	0	0	0	0	0	0	0	0	0	0	0	0	0	0
POLR2B	5431	symbol	H. sapiens	5431	H. sapiens	POLR2B	RNA polymerase II subunit B	GO:0006366 transcription by RNA polymerase II;GO:0006351 transcription, DNA-templated;GO:0097659 nucleic acid-templated transcription		RNA polymerase related proteins; Predicted intracellular proteins; Enzymes; ENZYME proteins:Transferases	Nucleoplasm (Supported)				1	0	1	0	1	0	0	0	0	0	0	0	0	0	0	0	0	0	1	0
POT1	25913	symbol	H. sapiens	25913	H. sapiens	POT1	protection of telomeres 1	GO:0060383 positive regulation of DNA strand elongation;GO:0060382 regulation of DNA strand elongation;GO:1905464 positive regulation of DNA duplex unwinding		Predicted intracellular proteins; Disease related genes; Cancer-related genes	Nucleoplasm (Supported)		(M105)PID TELOMERASE PATHWAY		1	1	1	0	0	0	0	0	0	0	0	0	0	0	0	1	0	0	1	0
PPIG	9360	symbol	H. sapiens	9360	H. sapiens	PPIG	peptidylprolyl isomerase G	GO:0000413 protein peptidyl-prolyl isomerization;GO:0018208 peptidyl-proline modification;GO:0006457 protein folding		Predicted intracellular proteins; ENZYME proteins:Isomerase; Enzymes	Nuclear speckles (Supported); Additional: Cytosol	Proline			0	0	0	0	1	0	0	0	0	0	0	0	0	0	0	0	0	0	0	0
PPP1R11	6992	symbol	H. sapiens	6992	H. sapiens	PPP1R11	protein phosphatase 1 regulatory inhibitor subunit 11	GO:0032515 negative regulation of phosphoprotein phosphatase activity;GO:0035308 negative regulation of protein dephosphorylation;GO:0010923 negative regulation of phosphatase activity		Predicted intracellular proteins; Enzymes; ENZYME proteins:Transferases	Vesicles (Approved)				0	0	0	0	0	0	0	0	0	0	0	0	0	0	0	0	0	0	0	0
PPP1R21	129285	symbol	H. sapiens	129285	H. sapiens	PPP1R21	protein phosphatase 1 regulatory subunit 21			Predicted intracellular proteins	Vesicles (Approved); Additional: Nucleoplasm				0	0	0	0	0	0	0	0	0	0	0	0	0	0	0	0	0	0	0	0
PPP1R36	145376	symbol	H. sapiens	145376	H. sapiens	PPP1R36	protein phosphatase 1 regulatory subunit 36	GO:0010923 negative regulation of phosphatase activity;GO:0035305 negative regulation of dephosphorylation;GO:0010921 regulation of phosphatase activity		Predicted intracellular proteins					0	0	0	0	0	0	0	0	0	0	0	0	0	0	0	0	0	0	0	0
PPP1R8	5511	symbol	H. sapiens	5511	H. sapiens	PPP1R8	protein phosphatase 1 regulatory subunit 8	GO:0035308 negative regulation of protein dephosphorylation;GO:0035305 negative regulation of dephosphorylation;GO:0035304 regulation of protein dephosphorylation		Predicted intracellular proteins	Nuclear speckles (Enhanced); Additional: Nucleoplasm			(M5925)HALLMARK E2F TARGETS	0	0	0	0	1	0	0	0	0	0	0	0	0	0	0	0	0	0	0	0
PPP2CA	5515	symbol	H. sapiens	5515	H. sapiens	PPP2CA	protein phosphatase 2 catalytic subunit alpha	GO:1904528 positive regulation of microtubule binding;GO:1904526 regulation of microtubule binding;GO:0035970 peptidyl-threonine dephosphorylation		Predicted intracellular proteins; Enzymes; ENZYME proteins:Hydrolases		Vitamin E; 2,6,8-Trimethyl-3-Amino-9-Benzyl-9-Methoxynonanoic Acid; (2S,3S,4E,6E,8S,9S)-3-amino-9-methoxy-2,6,8-trimethyl-10-phenyldeca-4,6-dienoic acid	(M139)PID MYC PATHWAY; (M210)PID IL8 CXCR2 PATHWAY; (M46)PID ATR PATHWAY		1	0	1	0	1	1	1	1	0	0	1	1	0	1	0	0	0	0	0	1
PPP4R1L	55370	symbol	H. sapiens	55370	H. sapiens	PPP4R1L	protein phosphatase 4 regulatory subunit 1 like (pseudogene)	GO:0006470 protein dephosphorylation;GO:0016311 dephosphorylation;GO:0050790 regulation of catalytic activity							0	0	0	0	0	0	0	0	0	0	0	0	0	0	0	0	0	0	0	0
PPWD1	23398	symbol	H. sapiens	23398	H. sapiens	PPWD1	peptidylprolyl isomerase domain and WD repeat containing 1	GO:0000413 protein peptidyl-prolyl isomerization;GO:0018208 peptidyl-proline modification;GO:0000377 RNA splicing, via transesterification reactions with bulged adenosine as nucleophile		Predicted intracellular proteins; ENZYME proteins:Isomerase; Enzymes	Nuclear bodies (Supported)				0	0	0	0	1	0	0	0	0	0	0	0	0	0	0	0	0	0	0	0
PQLC2L	152078	gene_synonym	H. sapiens	152078	H. sapiens	SLC66A1L	solute carrier family 66 member 1 like	GO:1902022 L-lysine transport;GO:1903401 L-lysine transmembrane transport;GO:1903826 arginine transmembrane transport		Predicted intracellular proteins	Nuclear bodies;Nucleoplasm (Approved)				0	0	0	0	0	0	0	0	0	0	0	0	0	0	0	0	0	0	0	0
PRC1	9055	symbol	H. sapiens	9055	H. sapiens	PRC1	protein regulator of cytokinesis 1	GO:0051256 mitotic spindle midzone assembly;GO:0000022 mitotic spindle elongation;GO:0051231 spindle elongation		Predicted intracellular proteins	Cytokinetic bridge;Microtubules;Midbody;Plasma membrane (Supported); Additional: Nucleoplasm		(M129)PID PLK1 PATHWAY	(M5893)HALLMARK MITOTIC SPINDLE; (M5901)HALLMARK G2M CHECKPOINT	1	1	0	1	0	0	0	0	0	0	1	0	0	0	0	0	0	0	0	0
PRCP	5547	symbol	H. sapiens	5547	H. sapiens	PRCP	prolylcarboxypeptidase	GO:0002254 kinin cascade;GO:0002353 plasma kallikrein-kinin cascade;GO:0002155 regulation of thyroid hormone mediated signaling pathway		Predicted intracellular proteins; Peptidases:Serine-type peptidases; Enzymes; ENZYME proteins:Hydrolases	Vesicles (Supported)			(M5921)HALLMARK COMPLEMENT	0	0	0	0	0	0	0	0	0	0	0	0	0	0	0	0	0	0	0	0
PRDM1	639	symbol	H. sapiens	639	H. sapiens	PRDM1	PR/SET domain 1	GO:0033082 regulation of extrathymic T cell differentiation;GO:1990654 sebum secreting cell proliferation;GO:0033078 extrathymic T cell differentiation		Cancer-related genes:Mutated cancer genes; Transcription factors:Zinc-coordinating DNA-binding domains; Predicted intracellular proteins	Nucleoli (Approved); Additional: Nucleoplasm		(M145)PID P53 DOWNSTREAM PATHWAY	(M5953)HALLMARK KRAS SIGNALING UP	0	0	1	0	0	0	0	0	0	0	0	0	0	0	0	0	0	0	0	0
PRDM2	7799	symbol	H. sapiens	7799	H. sapiens	PRDM2	PR/SET domain 2	GO:0008340 determination of adult lifespan;GO:0010259 multicellular organism aging;GO:0016571 histone methylation		Transcription factors:Zinc-coordinating DNA-binding domains; Predicted intracellular proteins; Enzymes; ENZYME proteins:Transferases	Golgi apparatus;Nucleoplasm (Approved)			(M5942)HALLMARK UV RESPONSE DN	0	0	0	0	0	0	0	0	0	0	0	0	1	0	0	0	0	0	0	0
PRDM4	11108	symbol	H. sapiens	11108	H. sapiens	PRDM4	PR/SET domain 4	GO:0043985 histone H4-R3 methylation;GO:0034969 histone arginine methylation;GO:0018216 peptidyl-arginine methylation		Transcription factors:Zinc-coordinating DNA-binding domains; Predicted intracellular proteins	Nucleoplasm (Supported)		(M153)PID P75 NTR PATHWAY	(M5921)HALLMARK COMPLEMENT	0	0	0	0	0	0	0	0	0	0	0	0	1	0	0	0	0	0	0	0
PREP	5550	symbol	H. sapiens	5550	H. sapiens	PREP	prolyl endopeptidase	GO:0006508 proteolysis;GO:0019538 protein metabolic process;GO:1901564 organonitrogen compound metabolic process		Predicted intracellular proteins; Peptidases:Serine-type peptidases; Enzymes; ENZYME proteins:Hydrolases	Cytosol (Supported)	1-Hydroxy-1-Thio-Glycerol; S-oxy-L-cysteine; Z-Pro-Prolinal; Monothioglycerol; (6S)-1-chloro-3-[(4-fluorobenzyl)oxy]-6-(pyrrolidin-1-ylcarbonyl)pyrrolo[1,2-a]pyrazin-4(6H)-one; 1-{3-oxo-3-[(2S)-2-(pyrrolidin-1-ylcarbonyl)pyrrolidin-1-yl]propyl}-3-phenylquinoxalin-2(1H)-one; 2-{3-[(2S)-4,4-difluoro-2-(pyrrolidin-1-ylcarbonyl)pyrrolidin-1-yl]-3-oxopropyl}-isoindole-1,3(2H)-dione		(M5946)HALLMARK COAGULATION; (M5921)HALLMARK COMPLEMENT	0	0	0	0	0	0	0	0	0	0	0	0	0	0	0	0	0	0	0	0
PRIM1	5557	symbol	H. sapiens	5557	H. sapiens	PRIM1	DNA primase subunit 1	GO:0006269 DNA replication, synthesis of RNA primer;GO:0006261 DNA-dependent DNA replication;GO:0006260 DNA replication		Predicted intracellular proteins	Golgi apparatus;Nucleoplasm;Vesicles (Approved)			(M5898)HALLMARK DNA REPAIR	1	0	0	0	0	1	0	1	0	0	0	0	0	0	0	0	0	0	1	0
PRKAB2	5565	symbol	H. sapiens	5565	H. sapiens	PRKAB2	protein kinase AMP-activated non-catalytic subunit beta 2	GO:0120162 positive regulation of cold-induced thermogenesis;GO:0106106 cold-induced thermogenesis;GO:0120161 regulation of cold-induced thermogenesis		Predicted intracellular proteins	Nucleoplasm (Approved); Additional: Cytosol				0	0	1	0	0	0	0	0	0	0	0	0	0	1	0	0	0	0	0	0
PRKCD	5580	symbol	H. sapiens	5580	H. sapiens	PRKCD	protein kinase C delta	GO:1900161 regulation of phospholipid scramblase activity;GO:1900163 positive regulation of phospholipid scramblase activity;GO:2000752 regulation of glucosylceramide catabolic process	AGC Ser/Thr protein kinase family	Disease related genes; Kinases:AGC Ser/Thr protein kinases; ENZYME proteins:Transferases; Predicted intracellular proteins; Cancer-related genes:Mutational cancer driver genes; Potential drug targets; Enzymes	Cytosol (Enhanced); Additional: Endoplasmic reticulum;Golgi apparatus	13-Acetylphorbol; Ingenol mebutate; Fostamatinib	(M125)PID IGF1 PATHWAY; (M165)PID SYNDECAN 4 PATHWAY; (M275)PID ALPHA SYNUCLEIN PATHWAY	(M5941)HALLMARK UV RESPONSE UP; (M5921)HALLMARK COMPLEMENT	1	1	1	0	1	0	0	0	0	0	0	0	1	0	0	0	0	0	0	0
PRKD3	23683	symbol	H. sapiens	23683	H. sapiens	PRKD3	protein kinase D3	GO:0089700 protein kinase D signaling;GO:0007205 protein kinase C-activating G protein-coupled receptor signaling pathway;GO:0030148 sphingolipid biosynthetic process	CAMK Ser/Thr protein kinase family	Kinases:CAMK Ser/Thr protein kinases; Predicted intracellular proteins; Enzymes; ENZYME proteins:Transferases	Cytosol;Nucleoplasm (Approved)				0	0	0	0	0	0	0	0	0	0	0	0	0	0	0	0	0	0	0	0
PROSER1	80209	symbol	H. sapiens	80209	H. sapiens	PROSER1	proline and serine rich 1			Predicted intracellular proteins	Nucleoplasm (Approved); Additional: Cytosol				0	0	0	0	0	0	0	0	0	0	0	0	0	0	0	0	0	0	0	0
PRPF3	9129	symbol	H. sapiens	9129	H. sapiens	PRPF3	pre-mRNA processing factor 3	GO:0000244 spliceosomal tri-snRNP complex assembly;GO:0000387 spliceosomal snRNP assembly;GO:0022618 ribonucleoprotein complex assembly		Predicted intracellular proteins; Disease related genes	Nucleoplasm (Enhanced)			(M5941)HALLMARK UV RESPONSE UP	0	0	0	0	1	0	0	0	0	0	0	0	0	0	0	0	0	0	0	0
PRPF38A	84950	symbol	H. sapiens	84950	H. sapiens	PRPF38A	pre-mRNA processing factor 38A	GO:0000377 RNA splicing, via transesterification reactions with bulged adenosine as nucleophile;GO:0000398 mRNA splicing, via spliceosome;GO:0000375 RNA splicing, via transesterification reactions		Predicted intracellular proteins	Nucleoplasm (Enhanced)				0	0	0	0	1	0	0	0	0	0	0	0	0	0	0	0	0	0	0	0
PRPF39	55015	symbol	H. sapiens	55015	H. sapiens	PRPF39	pre-mRNA processing factor 39	GO:0000395 mRNA 5'-splice site recognition;GO:0045292 mRNA cis splicing, via spliceosome;GO:0006376 mRNA splice site selection		Predicted intracellular proteins	Nucleoplasm (Approved)				0	0	0	0	1	0	0	0	0	0	0	0	0	0	0	0	0	0	0	0
PRPF4B	8899	symbol	H. sapiens	8899	H. sapiens	PRPF4B	pre-mRNA processing factor 4B	GO:0045292 mRNA cis splicing, via spliceosome;GO:0000377 RNA splicing, via transesterification reactions with bulged adenosine as nucleophile;GO:0000398 mRNA splicing, via spliceosome	CMGC Ser/Thr protein kinase family	Kinases:CMGC Ser/Thr protein kinases; Predicted intracellular proteins; Enzymes; ENZYME proteins:Transferases	Nuclear speckles (Supported)	Fostamatinib		(M5901)HALLMARK G2M CHECKPOINT	0	0	0	0	1	0	0	0	0	0	0	0	0	0	0	0	0	0	0	0
PRR11	55771	symbol	H. sapiens	55771	H. sapiens	PRR11	proline rich 11	GO:0051726 regulation of cell cycle;GO:0007049 cell cycle;GO:0050794 regulation of cellular process		Predicted intracellular proteins	Endoplasmic reticulum (Approved)				0	0	0	0	0	0	0	0	0	0	0	0	0	0	0	0	0	0	0	0
PRR3	80742	symbol	H. sapiens	80742	H. sapiens	PRR3	proline rich 3			Predicted intracellular proteins	Nucleoplasm (Approved); Additional: Cytosol				0	0	0	0	0	0	0	0	0	0	0	0	0	0	0	0	0	0	0	0
PRTFDC1	56952	symbol	H. sapiens	56952	H. sapiens	PRTFDC1	phosphoribosyl transferase domain containing 1	GO:0006178 guanine salvage;GO:0046099 guanine biosynthetic process;GO:0043096 purine nucleobase salvage		Predicted intracellular proteins	Nucleoplasm (Approved); Additional: Cytosol;Golgi apparatus				0	0	0	0	0	0	0	0	0	0	0	0	0	0	0	0	0	0	0	0
PSG10P	653492	symbol	H. sapiens	653492	H. sapiens	PSG10P	pregnancy specific beta-1-glycoprotein 10, pseudogene								0	0	0	0	0	0	0	0	0	0	0	0	0	0	0	0	0	0	0	0
PSIP1	11168	symbol	H. sapiens	11168	H. sapiens	PSIP1	PC4 and SFRS1 interacting protein 1	GO:0000395 mRNA 5'-splice site recognition;GO:0045292 mRNA cis splicing, via spliceosome;GO:0006376 mRNA splice site selection		Predicted intracellular proteins; Disease related genes; Cancer-related genes	Nucleoplasm (Enhanced)			(M5925)HALLMARK E2F TARGETS	0	0	0	0	1	0	0	0	0	0	0	0	0	0	0	0	0	0	0	0
PSMA2	5683	symbol	H. sapiens	5683	H. sapiens	PSMA2	proteasome 20S subunit alpha 2	GO:0009615 response to virus;GO:0043161 proteasome-mediated ubiquitin-dependent protein catabolic process;GO:0010498 proteasomal protein catabolic process		Predicted intracellular proteins; Peptidases:Threonine-type peptidases; Enzymes; ENZYME proteins:Hydrolases		(3AR,6R,6AS)-6-((S)-((S)-CYCLOHEX-2-ENYL)(HYDROXY)METHYL)-6A-METHYL-4-OXO-HEXAHYDRO-2H-FURO[3,2-C]PYRROLE-6-CARBALDEHYDE		(M5913)HALLMARK INTERFERON GAMMA RESPONSE; (M5926)HALLMARK MYC TARGETS V1	1	0	1	0	1	0	0	1	0	0	0	1	0	1	0	0	0	0	0	0
PSMD5	5711	symbol	H. sapiens	5711	H. sapiens	PSMD5	proteasome 26S subunit, non-ATPase 5	GO:0070682 proteasome regulatory particle assembly;GO:0043248 proteasome assembly;GO:0034622 cellular protein-containing complex assembly		Predicted intracellular proteins	Cytosol (Approved); Additional: Nucleoplasm				1	0	1	0	1	0	0	1	0	0	0	1	0	1	0	0	0	0	0	0
PSMG2	56984	symbol	H. sapiens	56984	H. sapiens	PSMG2	proteasome assembly chaperone 2	GO:0043248 proteasome assembly;GO:0051131 chaperone-mediated protein complex assembly;GO:0007094 mitotic spindle assembly checkpoint signaling		Predicted intracellular proteins	Nuclear bodies (Approved); Additional: Nucleoplasm				0	1	0	0	0	0	0	0	0	0	0	0	0	0	0	0	0	0	0	0
PSRC1	84722	symbol	H. sapiens	84722	H. sapiens	PSRC1	proline and serine rich coiled-coil 1	GO:0045737 positive regulation of cyclin-dependent protein serine/threonine kinase activity;GO:1904031 positive regulation of cyclin-dependent protein kinase activity;GO:0031116 positive regulation of microtubule polymerization		Predicted intracellular proteins	Cytosol (Approved); Additional: Nucleoplasm				0	1	0	1	0	0	0	0	1	1	0	0	0	0	0	0	0	0	0	0
PTCD3	55037	symbol	H. sapiens	55037	H. sapiens	PTCD3	pentatricopeptide repeat domain 3	GO:0032543 mitochondrial translation;GO:0140053 mitochondrial gene expression;GO:0006417 regulation of translation		Ribosomal proteins; Predicted intracellular proteins	Mitochondria (Supported)			(M5905)HALLMARK ADIPOGENESIS	0	0	0	0	0	0	0	0	0	0	0	0	0	0	0	0	0	0	0	0
PTGFR	5737	symbol	H. sapiens	5737	H. sapiens	PTGFR	prostaglandin F receptor	GO:0071798 response to prostaglandin D;GO:0071799 cellular response to prostaglandin D stimulus;GO:0007567 parturition		FDA approved drug targets:Small molecule drugs; G-protein coupled receptors:GPCRs excl olfactory receptors		Travoprost; Latanoprost; Bimatoprost; Dinoprost tromethamine; Tafluprost; Latanoprostene bunod		(M5942)HALLMARK UV RESPONSE DN; (M5956)HALLMARK KRAS SIGNALING DN	0	0	0	0	0	0	0	0	0	0	0	0	0	0	0	0	0	0	0	0
PTOV1-AS1	100506033	symbol	H. sapiens	100506033	H. sapiens	PTOV1-AS1	PTOV1 antisense RNA 1								0	0	0	0	0	0	0	0	0	0	0	0	0	0	0	0	0	0	0	0
PTPN12	5782	symbol	H. sapiens	5782	H. sapiens	PTPN12	protein tyrosine phosphatase non-receptor type 12	GO:2000587 negative regulation of platelet-derived growth factor receptor-beta signaling pathway;GO:2000586 regulation of platelet-derived growth factor receptor-beta signaling pathway;GO:0010642 negative regulation of platelet-derived growth factor receptor signaling pathway		Predicted intracellular proteins; Enzymes; ENZYME proteins:Hydrolases	Cytosol;Plasma membrane (Approved)	Tiludronic acid			0	0	0	0	0	0	0	0	0	0	0	0	0	0	0	0	0	0	0	0
PTPN18	26469	symbol	H. sapiens	26469	H. sapiens	PTPN18	protein tyrosine phosphatase non-receptor type 18	GO:1901185 negative regulation of ERBB signaling pathway;GO:0001825 blastocyst formation;GO:1901184 regulation of ERBB signaling pathway		Predicted intracellular proteins; Enzymes; ENZYME proteins:Hydrolases	Intermediate filaments (Approved)				0	0	0	0	0	0	0	0	0	0	0	0	0	0	0	0	0	0	0	0
PTTG1	9232	symbol	H. sapiens	9232	H. sapiens	PTTG1	PTTG1 regulator of sister chromatid separation, securin	GO:0033046 negative regulation of sister chromatid segregation;GO:0033048 negative regulation of mitotic sister chromatid segregation;GO:2000816 negative regulation of mitotic sister chromatid separation		Predicted intracellular proteins; Cancer-related genes:Candidate cancer biomarkers	Cytosol (Supported); Additional: Nucleoli			(M5901)HALLMARK G2M CHECKPOINT; (M5925)HALLMARK E2F TARGETS	1	1	1	0	0	0	1	0	0	0	0	1	0	0	0	0	0	0	0	1
PUM2	23369	symbol	H. sapiens	23369	H. sapiens	PUM2	pumilio RNA binding family member 2	GO:1900246 positive regulation of RIG-I signaling pathway;GO:0039535 regulation of RIG-I signaling pathway;GO:0039531 regulation of viral-induced cytoplasmic pattern recognition receptor signaling pathway		Predicted intracellular proteins	Cytosol (Enhanced)				0	1	0	1	1	0	0	0	0	0	0	0	0	0	0	0	0	0	0	0
PWP1	11137	symbol	H. sapiens	11137	H. sapiens	PWP1	PWP1 homolog, endonuclein	GO:0033140 negative regulation of peptidyl-serine phosphorylation of STAT protein;GO:0034773 histone H4-K20 trimethylation;GO:1901838 positive regulation of transcription of nucleolar large rRNA by RNA polymerase I		Predicted intracellular proteins	Nucleoli rim (Approved); Additional: Golgi apparatus			(M5926)HALLMARK MYC TARGETS V1	0	0	0	0	0	0	0	0	0	0	0	0	1	0	0	0	0	0	0	0
QPRT	23475	symbol	H. sapiens	23475	H. sapiens	QPRT	quinolinate phosphoribosyltransferase	GO:0034213 quinolinate catabolic process;GO:0046874 quinolinate metabolic process;GO:0072526 pyridine-containing compound catabolic process		FDA approved drug targets:Small molecule drugs; Predicted intracellular proteins; Enzymes; ENZYME proteins:Transferases	Vesicles (Approved)	Niacin			0	0	0	0	0	0	0	0	0	0	0	0	0	0	0	0	0	0	0	0
QRICH1	54870	symbol	H. sapiens	54870	H. sapiens	QRICH1	glutamine rich 1	GO:0036499 PERK-mediated unfolded protein response;GO:0140467 integrated stress response signaling;GO:0006984 ER-nucleus signaling pathway		Predicted intracellular proteins	Nucleoplasm (Enhanced)				0	0	0	0	0	0	0	0	0	0	0	0	0	0	0	0	0	0	0	0
QSER1	79832	symbol	H. sapiens	79832	H. sapiens	QSER1	glutamine and serine rich 1			Predicted intracellular proteins	Nucleoplasm (Approved); Additional: Cytosol				0	0	0	0	0	0	0	0	0	0	0	0	0	0	0	0	0	0	0	0
QTRTD1	79691	gene_synonym	H. sapiens	79691	H. sapiens	QTRT2	queuine tRNA-ribosyltransferase accessory subunit 2	GO:0101030 tRNA-guanine transglycosylation;GO:0006400 tRNA modification;GO:0008033 tRNA processing		Predicted intracellular proteins	Nucleoplasm (Approved); Additional: Intermediate filaments				0	0	0	0	1	0	0	0	0	0	0	0	0	0	0	0	0	0	0	0
R3HCC1L	27291	symbol	H. sapiens	27291	H. sapiens	R3HCC1L	R3H domain and coiled-coil containing 1 like			Predicted intracellular proteins	Nuclear speckles;Nucleoplasm (Approved)				0	0	0	0	0	0	0	0	0	0	0	0	0	0	0	0	0	0	0	0
R3HDM1	23518	symbol	H. sapiens	23518	H. sapiens	R3HDM1	R3H domain containing 1			Predicted intracellular proteins	Cytosol;Nucleoplasm (Approved)				0	0	0	0	0	0	0	0	0	0	0	0	0	0	0	0	0	0	0	0
RABL3	285282	symbol	H. sapiens	285282	H. sapiens	RABL3	RAB, member of RAS oncogene family like 3	GO:1903059 regulation of protein lipidation;GO:0050746 regulation of lipoprotein metabolic process;GO:0001779 natural killer cell differentiation		Predicted intracellular proteins	Nucleoplasm (Approved)				0	0	0	0	0	0	0	0	0	0	0	0	0	0	0	0	0	0	0	0
RACGAP1	29127	symbol	H. sapiens	29127	H. sapiens	RACGAP1	Rac GTPase activating protein 1	GO:0000912 assembly of actomyosin apparatus involved in cytokinesis;GO:0000915 actomyosin contractile ring assembly;GO:0044837 actomyosin contractile ring organization		Predicted intracellular proteins	Nucleoplasm (Enhanced)		(M83)PID CDC42 REG PATHWAY; (M241)PID RAC1 REG PATHWAY; (M14)PID AURORA B PATHWAY	(M5893)HALLMARK MITOTIC SPINDLE; (M5901)HALLMARK G2M CHECKPOINT; (M5925)HALLMARK E2F TARGETS	1	1	0	1	0	0	0	0	1	1	0	0	0	0	0	0	0	1	1	0
RAD17	5884	symbol	H. sapiens	5884	H. sapiens	RAD17	RAD17 checkpoint clamp loader component	GO:0033314 mitotic DNA replication checkpoint signaling;GO:0000076 DNA replication checkpoint signaling;GO:0031573 mitotic intra-S DNA damage checkpoint signaling		Predicted intracellular proteins	Nucleoplasm (Enhanced)		(M84)PID ATM PATHWAY; (M46)PID ATR PATHWAY; (M1)PID FANCONI PATHWAY	(M5951)HALLMARK SPERMATOGENESIS	1	1	1	0	0	1	0	1	0	0	0	0	0	0	0	0	1	0	0	0
RAD21	5885	symbol	H. sapiens	5885	H. sapiens	RAD21	RAD21 cohesin complex component	GO:1990414 replication-born double-strand break repair via sister chromatid exchange;GO:0045876 positive regulation of sister chromatid cohesion;GO:0007063 regulation of sister chromatid cohesion		Cancer-related genes:Mutated cancer genes; Cancer-related genes:Mutational cancer driver genes; Predicted intracellular proteins; Disease related genes	Nucleoplasm (Enhanced)			(M5901)HALLMARK G2M CHECKPOINT; (M5925)HALLMARK E2F TARGETS	1	1	1	0	0	0	1	1	1	0	0	1	0	0	0	1	1	0	0	1
RAD50	10111	symbol	H. sapiens	10111	H. sapiens	RAD50	RAD50 double strand break repair protein	GO:0031860 telomeric 3' overhang formation;GO:0000019 regulation of mitotic recombination;GO:1904354 negative regulation of telomere capping		Predicted intracellular proteins; Disease related genes	Nucleoplasm (Supported)		(M258)PID BARD1 PATHWAY; (M84)PID ATM PATHWAY; (M1)PID FANCONI PATHWAY	(M5925)HALLMARK E2F TARGETS	1	1	1	0	0	0	1	0	0	0	0	0	0	0	0	0	0	0	0	0
RAD51	5888	symbol	H. sapiens	5888	H. sapiens	RAD51	RAD51 recombinase	GO:1904631 response to glucoside;GO:1902298 cell cycle DNA replication maintenance of fidelity;GO:1990426 mitotic recombination-dependent replication fork processing		Predicted intracellular proteins; Disease related genes; Cancer-related genes:Candidate cancer biomarkers	Nucleoli rim (Supported); Additional: Cytosol	Phosphoaminophosphonic Acid-Adenylate Ester; Amuvatinib	(M258)PID BARD1 PATHWAY; (M46)PID ATR PATHWAY; (M19)PID P73PATHWAY	(M5898)HALLMARK DNA REPAIR	1	1	1	0	0	1	1	0	0	0	0	0	0	0	0	0	0	0	0	0
RAD51AP1	10635	symbol	H. sapiens	10635	H. sapiens	RAD51AP1	RAD51 associated protein 1	GO:0010520 regulation of reciprocal meiotic recombination;GO:0010845 positive regulation of reciprocal meiotic recombination;GO:1905168 positive regulation of double-strand break repair via homologous recombination		Predicted intracellular proteins	Nucleoplasm (Approved)			(M5925)HALLMARK E2F TARGETS	0	1	1	0	0	0	1	0	1	0	0	1	0	0	0	0	0	0	0	0
RAD51C	5889	symbol	H. sapiens	5889	H. sapiens	RAD51C	RAD51 paralog C	GO:0000707 meiotic DNA recombinase assembly;GO:0007066 female meiosis sister chromatid cohesion;GO:0000730 DNA recombinase assembly		Predicted intracellular proteins; Disease related genes	Cytosol;Mitochondria;Nucleoplasm (Supported); Additional: Cell Junctions;Vesicles			(M5925)HALLMARK E2F TARGETS; (M5939)HALLMARK P53 PATHWAY	1	1	1	0	0	0	1	0	1	0	0	0	0	0	0	0	1	0	0	1
RAD54B	25788	symbol	H. sapiens	25788	H. sapiens	RAD54B	RAD54 homolog B	GO:0008340 determination of adult lifespan;GO:0006312 mitotic recombination;GO:0010259 multicellular organism aging		Predicted intracellular proteins; Cancer-related genes:Candidate cancer biomarkers					0	1	1	0	0	0	1	0	0	0	0	0	0	0	0	0	0	0	0	0
RAD54L	8438	symbol	H. sapiens	8438	H. sapiens	RAD54L	RAD54 like	GO:0045003 double-strand break repair via synthesis-dependent strand annealing;GO:0008340 determination of adult lifespan;GO:0010259 multicellular organism aging		Predicted intracellular proteins	Nucleoplasm (Enhanced)			(M5901)HALLMARK G2M CHECKPOINT	0	1	1	0	0	0	1	0	0	0	0	0	0	0	0	0	0	0	0	0
RAE1	8480	symbol	H. sapiens	8480	H. sapiens	RAE1	ribonucleic acid export 1	GO:0000972 transcription-dependent tethering of RNA polymerase II gene DNA at nuclear periphery;GO:0060236 regulation of mitotic spindle organization;GO:0090224 regulation of spindle organization		Predicted intracellular proteins; Transporters:Transporter channels and pores	Nucleoli fibrillar center;Nucleoplasm (Supported)			(M5898)HALLMARK DNA REPAIR	1	1	0	1	1	0	0	0	0	0	0	0	0	0	0	0	0	0	0	0
RALB	5899	symbol	H. sapiens	5899	H. sapiens	RALB	RAS like proto-oncogene B	GO:0001927 exocyst assembly;GO:0001928 regulation of exocyst assembly;GO:0060178 regulation of exocyst localization		Predicted intracellular proteins; RAS pathway related proteins			(M76)PID P38 ALPHA BETA PATHWAY; (M136)PID FOXO PATHWAY; (M124)PID CXCR4 PATHWAY	(M5923)HALLMARK PI3K AKT MTOR SIGNALING	0	1	0	0	0	0	0	0	0	1	0	0	0	0	0	0	0	0	0	0
RAP2C-AS1	101928578	symbol	H. sapiens	101928578	H. sapiens	RAP2C-AS1	RAP2C antisense RNA 1								0	0	0	0	0	0	0	0	0	0	0	0	0	0	0	0	0	0	0	0
RASL12	51285	symbol	H. sapiens	51285	H. sapiens	RASL12	RAS like family 12	GO:0007165 signal transduction;GO:0023052 signaling;GO:0007154 cell communication		Predicted intracellular proteins					0	0	0	0	0	0	0	0	0	0	0	0	0	0	0	0	0	0	0	0
RBBP6	5930	symbol	H. sapiens	5930	H. sapiens	RBBP6	RB binding protein 6, ubiquitin ligase	GO:0061053 somite development;GO:0006275 regulation of DNA replication;GO:0035264 multicellular organism growth		Predicted intracellular proteins; Enzymes; ENZYME proteins:Transferases	Nuclear speckles (Enhanced)				1	0	1	0	1	1	0	0	0	0	0	1	0	0	0	0	0	0	0	0
RBL2	5934	symbol	H. sapiens	5934	H. sapiens	RBL2	RB transcriptional corepressor like 2	GO:0043550 regulation of lipid kinase activity;GO:2000134 negative regulation of G1/S transition of mitotic cell cycle;GO:1902807 negative regulation of cell cycle G1/S phase transition		Predicted intracellular proteins; Cancer-related genes:Candidate cancer biomarkers	Mitotic chromosome;Nucleoli rim;Nucleoplasm (Supported); Additional: Cytosol		(M12771)SA PTEN PATHWAY; (M136)PID FOXO PATHWAY; (M40)PID E2F PATHWAY		1	1	1	0	0	0	0	1	0	0	0	1	0	0	0	0	0	0	0	0
RBM17	84991	symbol	H. sapiens	84991	H. sapiens	RBM17	RNA binding motif protein 17	GO:0045292 mRNA cis splicing, via spliceosome;GO:0000380 alternative mRNA splicing, via spliceosome;GO:0000377 RNA splicing, via transesterification reactions with bulged adenosine as nucleophile		Predicted intracellular proteins	Nucleoplasm (Supported)				0	0	0	0	1	0	0	0	0	0	0	0	0	0	0	0	0	0	0	0
RBM22	55696	symbol	H. sapiens	55696	H. sapiens	RBM22	RNA binding motif protein 22	GO:0046827 positive regulation of protein export from nucleus;GO:0046825 regulation of protein export from nucleus;GO:0033120 positive regulation of RNA splicing		Predicted intracellular proteins	Nucleoplasm (Enhanced)				0	0	0	0	1	0	0	0	0	0	0	0	0	0	0	0	0	0	0	0
RBM25	58517	symbol	H. sapiens	58517	H. sapiens	RBM25	RNA binding motif protein 25	GO:0000381 regulation of alternative mRNA splicing, via spliceosome;GO:0000380 alternative mRNA splicing, via spliceosome;GO:0048024 regulation of mRNA splicing, via spliceosome		Predicted intracellular proteins	Nuclear speckles (Enhanced)				0	0	0	0	1	0	0	0	0	0	0	0	0	0	0	0	0	0	0	0
RBM41	55285	symbol	H. sapiens	55285	H. sapiens	RBM41	RNA binding motif protein 41	GO:0000377 RNA splicing, via transesterification reactions with bulged adenosine as nucleophile;GO:0000398 mRNA splicing, via spliceosome;GO:0000375 RNA splicing, via transesterification reactions		Predicted intracellular proteins	Cytosol;Nuclear speckles (Approved)				0	0	0	0	1	0	0	0	0	0	0	0	0	0	0	0	0	0	0	0
RBM43	375287	symbol	H. sapiens	375287	H. sapiens	RBM43	RNA binding motif protein 43			Predicted intracellular proteins	Nucleoli (Approved); Additional: Nucleoplasm				0	0	0	0	0	0	0	0	0	0	0	0	0	0	0	0	0	0	0	0
RBM5	10181	symbol	H. sapiens	10181	H. sapiens	RBM5	RNA binding motif protein 5	GO:0000381 regulation of alternative mRNA splicing, via spliceosome;GO:0000380 alternative mRNA splicing, via spliceosome;GO:0000245 spliceosomal complex assembly		Predicted intracellular proteins	Nucleoplasm (Enhanced)			(M5945)HALLMARK HEME METABOLISM	0	0	0	0	1	0	0	0	0	0	0	0	0	0	0	0	0	0	0	0
RBM5-AS1	100775107	symbol	H. sapiens	100775107	H. sapiens	RBM5-AS1	RBM5 antisense RNA 1								0	0	0	0	0	0	0	0	0	0	0	0	0	0	0	0	0	0	0	0
RBM7	10179	symbol	H. sapiens	10179	H. sapiens	RBM7	RNA binding motif protein 7	GO:0016076 snRNA catabolic process;GO:0034661 ncRNA catabolic process;GO:0016073 snRNA metabolic process		Predicted intracellular proteins	Nucleoplasm (Enhanced)				0	0	0	0	1	0	1	0	0	0	0	0	0	0	0	0	0	0	0	0
RBPMS2	348093	symbol	H. sapiens	348093	H. sapiens	RBPMS2	RNA binding protein, mRNA processing factor 2	GO:0048557 embryonic digestive tract morphogenesis;GO:0051151 negative regulation of smooth muscle cell differentiation;GO:0048566 embryonic digestive tract development		Predicted intracellular proteins					0	0	0	0	0	0	0	0	0	0	0	0	0	0	0	0	0	0	0	0
REV1	51455	symbol	H. sapiens	51455	H. sapiens	REV1	REV1 DNA directed polymerase	GO:0070987 error-free translesion synthesis;GO:0042276 error-prone translesion synthesis;GO:0019985 translesion synthesis		Predicted intracellular proteins	Cytosol (Approved)				0	0	1	0	0	1	0	0	0	0	0	0	0	0	0	0	0	0	0	0
RFC1	5981	symbol	H. sapiens	5981	H. sapiens	RFC1	replication factor C subunit 1	GO:0090618 DNA clamp unloading;GO:0007004 telomere maintenance via telomerase;GO:0006278 RNA-dependent DNA biosynthetic process		Predicted intracellular proteins	Nucleoplasm (Enhanced)		(M94)PID FAS PATHWAY	(M5893)HALLMARK MITOTIC SPINDLE; (M5925)HALLMARK E2F TARGETS	1	0	1	0	0	1	0	1	0	0	0	0	0	0	0	0	0	0	1	0
RFC3	5983	symbol	H. sapiens	5983	H. sapiens	RFC3	replication factor C subunit 3	GO:1900262 regulation of DNA-directed DNA polymerase activity;GO:1900264 positive regulation of DNA-directed DNA polymerase activity;GO:0006271 DNA strand elongation involved in DNA replication		Predicted intracellular proteins	Nucleoplasm;Vesicles (Supported)		(M46)PID ATR PATHWAY; (M1)PID FANCONI PATHWAY	(M5898)HALLMARK DNA REPAIR; (M5925)HALLMARK E2F TARGETS	1	0	1	0	0	1	0	1	0	0	0	0	0	0	0	0	0	0	1	0
RFC4	5984	symbol	H. sapiens	5984	H. sapiens	RFC4	replication factor C subunit 4	GO:1900262 regulation of DNA-directed DNA polymerase activity;GO:1900264 positive regulation of DNA-directed DNA polymerase activity;GO:0006271 DNA strand elongation involved in DNA replication		Predicted intracellular proteins	Nucleoplasm (Enhanced)		(M46)PID ATR PATHWAY; (M1)PID FANCONI PATHWAY	(M5951)HALLMARK SPERMATOGENESIS; (M5898)HALLMARK DNA REPAIR; (M5941)HALLMARK UV RESPONSE UP	1	0	1	0	0	1	0	1	0	0	0	0	0	0	0	0	0	0	1	0
RFC5	5985	symbol	H. sapiens	5985	H. sapiens	RFC5	replication factor C subunit 5	GO:1900262 regulation of DNA-directed DNA polymerase activity;GO:1900264 positive regulation of DNA-directed DNA polymerase activity;GO:0090329 regulation of DNA-dependent DNA replication		Predicted intracellular proteins	Nucleoplasm (Approved)		(M46)PID ATR PATHWAY; (M1)PID FANCONI PATHWAY	(M5898)HALLMARK DNA REPAIR	1	0	1	0	0	1	0	1	0	0	0	0	0	0	0	0	0	0	1	0
RFWD3	55159	symbol	H. sapiens	55159	H. sapiens	RFWD3	ring finger and WD repeat domain 3	GO:0031049 programmed DNA elimination;GO:0031052 chromosome breakage;GO:2000001 regulation of DNA damage checkpoint		Disease related genes; ENZYME proteins:Transferases; Predicted intracellular proteins; Potential drug targets; Enzymes	Nucleoplasm (Enhanced); Additional: Cytosol				0	1	1	0	0	1	0	0	0	0	0	0	0	0	0	0	1	0	0	0
RFX7	64864	symbol	H. sapiens	64864	H. sapiens	RFX7	regulatory factor X7	GO:0006357 regulation of transcription by RNA polymerase II;GO:0006366 transcription by RNA polymerase II;GO:0006355 regulation of transcription, DNA-templated		Predicted intracellular proteins; Transcription factors:Helix-turn-helix domains	Nuclear membrane;Nucleoplasm (Approved)				0	0	0	0	0	0	0	0	0	0	0	0	0	0	0	0	0	0	0	0
RFX8	731220	symbol	H. sapiens	731220	H. sapiens	RFX8	regulatory factor X8	GO:0006357 regulation of transcription by RNA polymerase II;GO:0006366 transcription by RNA polymerase II;GO:0006355 regulation of transcription, DNA-templated		Predicted intracellular proteins; Transcription factors:Helix-turn-helix domains	Nucleoplasm (Approved); Additional: Nuclear bodies				0	0	0	0	0	0	0	0	0	0	0	0	0	0	0	0	0	0	0	0
RGL4	266747	symbol	H. sapiens	266747	H. sapiens	RGL4	ral guanine nucleotide dissociation stimulator like 4	GO:0007264 small GTPase mediated signal transduction;GO:0050790 regulation of catalytic activity;GO:0035556 intracellular signal transduction		Predicted intracellular proteins	Centrosome (Approved)				0	0	0	0	0	0	0	0	0	0	0	0	0	0	0	0	0	0	0	0
RHBDD1	84236	symbol	H. sapiens	84236	H. sapiens	RHBDD1	rhomboid domain containing 1	GO:1904211 membrane protein proteolysis involved in retrograde protein transport, ER to cytosol;GO:1905936 regulation of germ cell proliferation;GO:2000254 regulation of male germ cell proliferation		Peptidases:Serine-type peptidases; Predicted intracellular proteins; Transporters; ENZYME proteins:Hydrolases; Enzymes	Endoplasmic reticulum (Supported)				0	0	0	0	0	0	0	0	0	0	0	0	0	0	0	0	0	0	0	0
RHNO1	83695	symbol	H. sapiens	83695	H. sapiens	RHNO1	RAD9-HUS1-RAD1 interacting nuclear orphan 1	GO:0070318 positive regulation of G0 to G1 transition;GO:0070316 regulation of G0 to G1 transition;GO:0045023 G0 to G1 transition		Predicted intracellular proteins					1	1	1	0	0	0	0	0	1	0	0	0	0	0	0	0	1	0	0	0
RHOU	58480	symbol	H. sapiens	58480	H. sapiens	RHOU	ras homolog family member U	GO:0032488 Cdc42 protein signal transduction;GO:1903955 positive regulation of protein targeting to mitochondrion;GO:1903749 positive regulation of establishment of protein localization to mitochondrion		Predicted intracellular proteins			(M5493)WNT SIGNALING		1	0	0	0	0	0	0	0	0	0	0	0	0	0	0	0	0	0	0	0
RMI1	80010	symbol	H. sapiens	80010	H. sapiens	RMI1	RecQ mediated genome instability 1	GO:0000712 resolution of meiotic recombination intermediates;GO:0051307 meiotic chromosome separation;GO:0007131 reciprocal meiotic recombination		Predicted intracellular proteins	Nuclear bodies;Nucleoplasm (Supported)		(M1)PID FANCONI PATHWAY		1	1	1	0	0	1	1	0	0	0	0	0	0	0	0	0	0	0	0	0
RNASE4	6038	symbol	H. sapiens	6038	H. sapiens	RNASE4	ribonuclease A family member 4	GO:0006379 mRNA cleavage;GO:0090502 RNA phosphodiester bond hydrolysis, endonucleolytic;GO:0090501 RNA phosphodiester bond hydrolysis		Predicted secreted proteins		2'-Deoxyuridine 3'-Monophosphate			0	0	0	0	1	0	0	0	0	0	0	0	0	0	0	0	0	0	0	0
RNASEH2B	79621	symbol	H. sapiens	79621	H. sapiens	RNASEH2B	ribonuclease H2 subunit B	GO:2000001 regulation of DNA damage checkpoint;GO:1901976 regulation of cell cycle checkpoint;GO:0048146 positive regulation of fibroblast proliferation		Predicted intracellular proteins; Disease related genes	Nucleoplasm (Enhanced)				0	1	1	0	0	0	0	0	0	0	0	0	0	0	0	0	1	0	0	0
RNF111	54778	symbol	H. sapiens	54778	H. sapiens	RNF111	ring finger protein 111	GO:0070911 global genome nucleotide-excision repair;GO:0030579 ubiquitin-dependent SMAD protein catabolic process;GO:0030511 positive regulation of transforming growth factor beta receptor signaling pathway		Predicted intracellular proteins; Enzymes; ENZYME proteins:Transferases	Nucleoplasm (Supported); Additional: Cytosol		(M286)PID TGFBR PATHWAY		0	0	1	0	0	0	0	0	0	0	0	1	0	0	0	0	0	0	0	0
RNF157	114804	symbol	H. sapiens	114804	H. sapiens	RNF157	ring finger protein 157	GO:0043951 negative regulation of cAMP-mediated signaling;GO:1903861 positive regulation of dendrite extension;GO:1903859 regulation of dendrite extension		Predicted intracellular proteins; Enzymes; ENZYME proteins:Transferases	Golgi apparatus (Approved); Additional: Vesicles				0	0	0	0	0	0	0	0	0	0	0	0	0	0	0	0	0	0	0	0
RNF20	56254	symbol	H. sapiens	56254	H. sapiens	RNF20	ring finger protein 20	GO:2001168 positive regulation of histone H2B ubiquitination;GO:0033184 positive regulation of histone ubiquitination;GO:2001166 regulation of histone H2B ubiquitination		Predicted intracellular proteins; Enzymes; ENZYME proteins:Transferases	Nucleoplasm (Enhanced)				1	1	0	0	1	0	0	0	0	0	0	0	1	0	0	0	0	0	0	0
RNF214	257160	symbol	H. sapiens	257160	H. sapiens	RNF214	ring finger protein 214	GO:0016567 protein ubiquitination;GO:0032446 protein modification by small protein conjugation;GO:0070647 protein modification by small protein conjugation or removal		Predicted intracellular proteins	Cytosol;Golgi apparatus (Approved)				0	0	0	0	0	0	0	0	0	0	0	0	0	0	0	0	0	0	0	0
RNF26	79102	symbol	H. sapiens	79102	H. sapiens	RNF26	ring finger protein 26	GO:1905719 protein localization to perinuclear region of cytoplasm;GO:0050687 negative regulation of defense response to virus;GO:0070979 protein K11-linked ubiquitination		Enzymes; ENZYME proteins:Transferases	Nucleoplasm (Approved); Additional: Cytosol;Vesicles				0	0	0	0	0	0	0	0	0	0	0	1	0	0	0	0	0	0	0	0
RNF8	9025	symbol	H. sapiens	9025	H. sapiens	RNF8	ring finger protein 8	GO:0070535 histone H2A K63-linked ubiquitination;GO:0035093 spermatogenesis, exchange of chromosomal proteins;GO:0033523 histone H2B ubiquitination		Predicted intracellular proteins; Enzymes; ENZYME proteins:Transferases	Nucleoplasm (Supported); Additional: Cytosol		(M84)PID ATM PATHWAY		1	1	1	0	0	0	0	0	0	0	0	0	1	0	0	0	0	1	0	0
RNMT	8731	symbol	H. sapiens	8731	H. sapiens	RNMT	RNA guanine-7 methyltransferase	GO:0106005 RNA 5'-cap (guanine-N7)-methylation;GO:0036265 RNA (guanine-N7)-methylation;GO:0006370 7-methylguanosine mRNA capping		Predicted intracellular proteins; Enzymes; ENZYME proteins:Transferases	Nucleoplasm (Supported); Additional: Nucleoli fibrillar center			(M5898)HALLMARK DNA REPAIR	0	0	0	0	1	0	0	0	0	0	0	0	0	0	0	0	0	0	0	0
RNPC3	55599	symbol	H. sapiens	55599	H. sapiens	RNPC3	RNA binding region (RNP1, RRM) containing 3	GO:0000377 RNA splicing, via transesterification reactions with bulged adenosine as nucleophile;GO:0000398 mRNA splicing, via spliceosome;GO:0000375 RNA splicing, via transesterification reactions		Predicted intracellular proteins	Nucleoplasm (Supported)				0	0	0	0	1	0	0	0	0	0	0	0	0	0	0	0	0	0	0	0
RPA1	6117	symbol	H. sapiens	6117	H. sapiens	RPA1	replication protein A1	GO:0006268 DNA unwinding involved in DNA replication;GO:0006298 mismatch repair;GO:0006284 base-excision repair		Predicted intracellular proteins	Nucleoplasm (Enhanced)		(M46)PID ATR PATHWAY; (M1)PID FANCONI PATHWAY	(M5924)HALLMARK MTORC1 SIGNALING; (M5925)HALLMARK E2F TARGETS	1	0	1	0	0	1	1	1	0	0	0	0	0	0	0	1	0	0	1	0
RPA3	6119	symbol	H. sapiens	6119	H. sapiens	RPA3	replication protein A3	GO:0006298 mismatch repair;GO:0006284 base-excision repair;GO:0006289 nucleotide-excision repair		Predicted intracellular proteins				(M5898)HALLMARK DNA REPAIR; (M5925)HALLMARK E2F TARGETS	1	1	1	0	0	1	0	1	0	0	0	0	0	0	0	0	0	0	1	0
RPAP3	79657	symbol	H. sapiens	79657	H. sapiens	RPAP3	RNA polymerase II associated protein 3			Predicted intracellular proteins	Cytosol (Enhanced)				0	0	0	0	0	0	0	0	0	0	0	0	0	0	0	0	0	0	0	0
RPGR	6103	symbol	H. sapiens	6103	H. sapiens	RPGR	retinitis pigmentosa GTPase regulator	GO:0042073 intraciliary transport;GO:0010970 transport along microtubule;GO:0099111 microtubule-based transport		Cancer-related genes:Mutational cancer driver genes; Predicted intracellular proteins; Disease related genes	Golgi apparatus (Supported)				0	0	0	0	0	0	0	0	0	0	0	0	0	0	0	0	0	0	0	0
RPRD2	23248	symbol	H. sapiens	23248	H. sapiens	RPRD2	regulation of nuclear pre-mRNA domain containing 2	GO:0031124 mRNA 3'-end processing;GO:0031123 RNA 3'-end processing;GO:0006397 mRNA processing		Predicted intracellular proteins	Nucleoplasm;Vesicles (Approved)				0	0	0	0	1	0	0	0	0	0	0	0	0	0	0	0	0	0	0	0
RPS6KA5	9252	symbol	H. sapiens	9252	H. sapiens	RPS6KA5	ribosomal protein S6 kinase A5	GO:0043990 histone H2A-S1 phosphorylation;GO:0043988 histone H3-S28 phosphorylation;GO:0043987 histone H3-S10 phosphorylation	AGC Ser/Thr protein kinase family	Kinases:AGC Ser/Thr protein kinases; Predicted intracellular proteins; Enzymes; ENZYME proteins:Transferases	Nucleoplasm (Enhanced)		(M56)PID LPA4 PATHWAY; (M270)PID MAPK TRK PATHWAY; (M229)PID P38 ALPHA BETA DOWNSTREAM PATHWAY	(M5901)HALLMARK G2M CHECKPOINT	0	0	0	0	0	0	0	0	0	0	0	0	1	0	0	0	0	0	0	0
RRAGD	58528	symbol	H. sapiens	58528	H. sapiens	RRAGD	Ras related GTP binding D	GO:0071233 cellular response to leucine;GO:1990253 cellular response to leucine starvation;GO:0043201 response to leucine		Predicted intracellular proteins	Nucleoplasm (Approved); Additional: Centrosome;Vesicles		(M121)PID MTOR 4PATHWAY	(M5947)HALLMARK IL2 STAT5 SIGNALING; (M5891)HALLMARK HYPOXIA; (M5937)HALLMARK GLYCOLYSIS	0	0	1	0	0	0	0	0	0	0	0	0	0	0	0	0	0	0	0	0
RRM1	6240	symbol	H. sapiens	6240	H. sapiens	RRM1	ribonucleotide reductase catalytic subunit M1	GO:0009263 deoxyribonucleotide biosynthetic process;GO:0051290 protein heterotetramerization;GO:0006206 pyrimidine nucleobase metabolic process		ENZYME proteins:Oxidoreductases; FDA approved drug targets:Small molecule drugs; Predicted intracellular proteins; Enzymes	Cytosol (Supported)	Cladribine; Gemcitabine; Clofarabine; Hydroxyurea; Fludarabine; Imexon; Gallium maltolate; Tezacitabine	(M40)PID E2F PATHWAY	(M5926)HALLMARK MYC TARGETS V1	0	0	0	0	0	1	0	1	0	0	0	0	0	0	0	0	0	0	0	0
RRM2	6241	symbol	H. sapiens	6241	H. sapiens	RRM2	ribonucleotide reductase regulatory subunit M2	GO:0009263 deoxyribonucleotide biosynthetic process;GO:0051290 protein heterotetramerization;GO:0051291 protein heterooligomerization		ENZYME proteins:Oxidoreductases; FDA approved drug targets:Small molecule drugs; Predicted intracellular proteins; Enzymes	Cytosol (Supported)	Cladribine; Imexon; Gallium nitrate; Motexafin gadolinium; GTI 2040	(M40)PID E2F PATHWAY	(M5924)HALLMARK MTORC1 SIGNALING; (M5925)HALLMARK E2F TARGETS	1	0	0	0	0	1	0	1	0	0	0	0	0	0	0	0	0	0	0	0
RSPO4	343637	symbol	H. sapiens	343637	H. sapiens	RSPO4	R-spondin 4	GO:0035878 nail development;GO:0030177 positive regulation of Wnt signaling pathway;GO:0048736 appendage development		Disease related genes; Predicted secreted proteins			(M3008)NABA ECM GLYCOPROTEINS; (M5884)NABA CORE MATRISOME; (M5889)NABA MATRISOME		0	0	0	0	0	0	0	0	0	0	0	0	0	0	0	0	0	0	0	0
RSRC2	65117	symbol	H. sapiens	65117	H. sapiens	RSRC2	arginine and serine rich coiled-coil 2			Predicted intracellular proteins	Nuclear speckles (Approved); Additional: Cytosol;Nucleoli fibrillar center				0	0	0	0	0	0	0	0	0	0	0	0	0	0	0	0	0	0	0	0
RUNX1T1	862	symbol	H. sapiens	862	H. sapiens	RUNX1T1	RUNX1 partner transcriptional co-repressor 1	GO:0045599 negative regulation of fat cell differentiation;GO:0045598 regulation of fat cell differentiation;GO:0045444 fat cell differentiation		Predicted intracellular proteins; Disease related genes; Cancer-related genes	Nucleoplasm (Supported)				0	0	0	0	0	0	0	0	0	0	0	0	0	0	0	0	0	0	0	0
RUNX2	860	symbol	H. sapiens	860	H. sapiens	RUNX2	RUNX family transcription factor 2	GO:0002051 osteoblast fate commitment;GO:0042487 regulation of odontogenesis of dentin-containing tooth;GO:0042481 regulation of odontogenesis		Predicted intracellular proteins; Disease related genes; Transcription factors:Immunoglobulin fold	Nucleoplasm (Enhanced)		(M288)PID HES HEY PATHWAY; (M276)PID FGF PATHWAY; (M279)PID RB 1PATHWAY		0	0	0	0	0	0	0	0	0	0	0	0	0	0	0	0	0	0	0	0
S100A2	6273	symbol	H. sapiens	6273	H. sapiens	S100A2	S100 calcium binding protein A2	GO:0043542 endothelial cell migration;GO:0010631 epithelial cell migration;GO:0090132 epithelium migration		Predicted intracellular proteins; Cancer-related genes:Candidate cancer biomarkers	Cytosol;Nucleoplasm (Approved); Additional: Nucleoli;Plasma membrane	Olopatadine; Calcium; Zinc; Copper; Zinc acetate; Zinc chloride; Zinc sulfate, unspecified form	(M256)PID TAP63 PATHWAY; (M19)PID P73PATHWAY; (M145)PID P53 DOWNSTREAM PATHWAY		0	0	0	0	0	0	0	0	0	0	0	0	0	0	0	0	0	0	0	0
S100PBP	64766	symbol	H. sapiens	64766	H. sapiens	S100PBP	S100P binding protein			Predicted intracellular proteins	Nuclear speckles (Supported)				0	0	0	0	0	0	0	0	0	0	0	0	0	0	0	0	0	0	0	0
SALL1	6299	symbol	H. sapiens	6299	H. sapiens	SALL1	spalt like transcription factor 1	GO:0031129 inductive cell-cell signaling;GO:0061034 olfactory bulb mitral cell layer development;GO:0072092 ureteric bud invasion		Transcription factors:Zinc-coordinating DNA-binding domains; Predicted intracellular proteins; Disease related genes	Nucleoplasm (Approved); Additional: Cytosol;Nuclear speckles;Nucleoli				0	0	0	0	0	0	0	0	0	0	0	0	0	0	0	0	0	0	0	0
SAMD9	54809	symbol	H. sapiens	54809	H. sapiens	SAMD9	sterile alpha motif domain containing 9	GO:0034058 endosomal vesicle fusion;GO:0006906 vesicle fusion;GO:0090174 organelle membrane fusion		Predicted intracellular proteins; Disease related genes	Cytosol (Supported); Additional: Vesicles			(M5911)HALLMARK INTERFERON ALPHA RESPONSE	0	0	0	0	0	0	0	0	0	0	0	0	0	0	0	0	0	0	0	0
SAP130	79595	symbol	H. sapiens	79595	H. sapiens	SAP130	Sin3A associated protein 130	GO:0000122 negative regulation of transcription by RNA polymerase II;GO:0045892 negative regulation of transcription, DNA-templated;GO:1903507 negative regulation of nucleic acid-templated transcription		Predicted intracellular proteins	Nuclear speckles (Supported)				0	0	0	0	0	0	0	0	0	0	0	0	1	0	0	0	0	0	0	0
SASS6	163786	symbol	H. sapiens	163786	H. sapiens	SASS6	SAS-6 centriolar assembly protein	GO:0007099 centriole replication;GO:0098534 centriole assembly;GO:0051298 centrosome duplication		Predicted intracellular proteins; Disease related genes	Centriolar satellite (Supported); Additional: Cytosol			(M5893)HALLMARK MITOTIC SPINDLE	0	0	0	1	0	0	0	0	0	0	0	0	0	0	1	0	0	0	0	0
SCAF11	9169	symbol	H. sapiens	9169	H. sapiens	SCAF11	SR-related CTD associated factor 11	GO:0000245 spliceosomal complex assembly;GO:0022618 ribonucleoprotein complex assembly;GO:0071826 ribonucleoprotein complex subunit organization		Predicted intracellular proteins	Nucleoplasm (Enhanced); Additional: Nuclear bodies				0	0	0	0	1	0	0	0	0	0	0	0	0	0	0	0	0	0	0	0
SCARB2	950	symbol	H. sapiens	950	H. sapiens	SCARB2	scavenger receptor class B member 2	GO:1905123 regulation of glucosylceramidase activity;GO:1904978 regulation of endosome organization;GO:1905671 regulation of lysosome organization		Disease related genes	Cytosol (Approved)				0	0	0	0	0	0	0	0	0	0	0	0	0	0	0	0	0	0	0	0
SCLT1	132320	symbol	H. sapiens	132320	H. sapiens	SCLT1	sodium channel and clathrin linker 1	GO:0045162 clustering of voltage-gated sodium channels;GO:0045161 neuronal ion channel clustering;GO:0042551 neuron maturation		Predicted intracellular proteins					0	0	0	0	0	0	0	0	0	0	0	0	0	1	0	0	0	0	0	0
SCML2	10389	symbol	H. sapiens	10389	H. sapiens	SCML2	Scm polycomb group protein like 2	GO:0045892 negative regulation of transcription, DNA-templated;GO:1903507 negative regulation of nucleic acid-templated transcription;GO:1902679 negative regulation of RNA biosynthetic process		Predicted intracellular proteins	Cytosol;Nucleoli (Approved)				0	0	0	0	0	0	0	0	0	0	0	0	0	0	0	0	0	0	0	0
SCYL3	57147	symbol	H. sapiens	57147	H. sapiens	SCYL3	SCY1 like pseudokinase 3	GO:0021522 spinal cord motor neuron differentiation;GO:0021517 ventral spinal cord development;GO:0021515 cell differentiation in spinal cord	Other	Predicted intracellular proteins; Enzymes; Kinases	Microtubules (Uncertain); Additional: Nuclear bodies				0	0	0	0	0	0	0	0	0	0	0	0	0	0	0	0	0	0	0	0
SEC16B	89866	symbol	H. sapiens	89866	H. sapiens	SEC16B	SEC16 homolog B, endoplasmic reticulum export factor	GO:0070973 protein localization to endoplasmic reticulum exit site;GO:0016559 peroxisome fission;GO:0070863 positive regulation of protein exit from endoplasmic reticulum		Predicted intracellular proteins	Endoplasmic reticulum;Plasma membrane (Approved); Additional: Actin filaments				0	1	0	0	0	0	0	0	0	0	0	0	0	0	0	0	0	0	0	0
SEC23IP	11196	symbol	H. sapiens	11196	H. sapiens	SEC23IP	SEC23 interacting protein	GO:0006888 endoplasmic reticulum to Golgi vesicle-mediated transport;GO:0007030 Golgi organization;GO:0048193 Golgi vesicle transport		Predicted intracellular proteins	Vesicles (Enhanced)				0	0	0	0	0	0	0	0	0	0	0	0	0	0	0	0	0	0	0	0
SEC24B	10427	symbol	H. sapiens	10427	H. sapiens	SEC24B	SEC24 homolog B, COPII coat complex component	GO:1901301 regulation of cargo loading into COPII-coated vesicle;GO:0021747 cochlear nucleus development;GO:0061156 pulmonary artery morphogenesis		Predicted intracellular proteins	Nucleoplasm;Vesicles (Approved)				0	0	0	0	0	0	0	0	0	0	0	1	0	0	0	0	0	0	0	0
SEC61A2	55176	symbol	H. sapiens	55176	H. sapiens	SEC61A2	SEC61 translocon subunit alpha 2	GO:0031204 posttranslational protein targeting to membrane, translocation;GO:0006616 SRP-dependent cotranslational protein targeting to membrane, translocation;GO:0006620 posttranslational protein targeting to endoplasmic reticulum membrane		Transporters:Primary Active Transporters					0	0	0	0	0	0	0	0	0	0	0	1	0	0	0	0	0	0	0	0
SEMA4D	10507	symbol	H. sapiens	10507	H. sapiens	SEMA4D	semaphorin 4D	GO:1900220 semaphorin-plexin signaling pathway involved in bone trabecula morphogenesis;GO:1905704 positive regulation of inhibitory synapse assembly;GO:0010693 negative regulation of alkaline phosphatase activity		CD markers; Predicted intracellular proteins			(M5880)NABA ECM AFFILIATED; (M5885)NABA MATRISOME ASSOCIATED; (M5889)NABA MATRISOME	(M5932)HALLMARK INFLAMMATORY RESPONSE	0	1	0	0	0	0	0	0	0	0	0	0	0	0	0	0	0	0	0	0
SENP1	29843	symbol	H. sapiens	29843	H. sapiens	SENP1	SUMO specific peptidase 1	GO:0016926 protein desumoylation;GO:0006919 activation of cysteine-type endopeptidase activity involved in apoptotic process;GO:0043280 positive regulation of cysteine-type endopeptidase activity involved in apoptotic process		Predicted intracellular proteins; Enzymes; Peptidases:Cysteine-type peptidases	Nucleoplasm (Supported); Additional: Focal adhesion sites		(M151)PID AR TF PATHWAY		1	0	0	0	0	0	0	0	0	0	0	0	1	0	0	0	0	0	0	0
SEPP1	6414	gene_synonym	H. sapiens	6414	H. sapiens	SELENOP	selenoprotein P	GO:0001887 selenium compound metabolic process;GO:0009791 post-embryonic development;GO:0007626 locomotory behavior		Predicted secreted proteins	Golgi apparatus;Nucleoplasm (Uncertain)	Zinc; Zinc acetate; Zinc chloride; Zinc sulfate, unspecified form		(M5908)HALLMARK ANDROGEN RESPONSE; (M5956)HALLMARK KRAS SIGNALING DN	0	0	0	0	0	0	0	0	0	0	0	0	0	0	0	0	0	0	0	0
SEPSECS	51091	symbol	H. sapiens	51091	H. sapiens	SEPSECS	Sep (O-phosphoserine) tRNA:Sec (selenocysteine) tRNA synthase	GO:0097056 selenocysteinyl-tRNA(Sec) biosynthetic process;GO:0001514 selenocysteine incorporation;GO:0006451 translational readthrough		Disease related genes; ENZYME proteins:Transferases; Predicted intracellular proteins; Potential drug targets; Enzymes	Vesicles (Approved)	Pyridoxal phosphate			0	0	0	0	0	0	0	0	0	0	0	0	0	0	0	0	0	0	0	0
SERPINB8	5271	symbol	H. sapiens	5271	H. sapiens	SERPINB8	serpin family B member 8	GO:0090136 epithelial cell-cell adhesion;GO:0010951 negative regulation of endopeptidase activity;GO:0010466 negative regulation of peptidase activity		Predicted intracellular proteins; Disease related genes	Nucleoplasm (Approved); Additional: Cytosol		(M3468)NABA ECM REGULATORS; (M5885)NABA MATRISOME ASSOCIATED; (M5889)NABA MATRISOME	(M5890)HALLMARK TNFA SIGNALING VIA NFKB	0	0	0	0	0	0	0	0	0	0	0	0	0	0	0	0	0	0	0	0
SERPING1	710	symbol	H. sapiens	710	H. sapiens	SERPING1	serpin family G member 1	GO:0001868 regulation of complement activation, lectin pathway;GO:0001869 negative regulation of complement activation, lectin pathway;GO:0001867 complement activation, lectin pathway		Predicted secreted proteins; Predicted intracellular proteins; Candidate cardiovascular disease genes; Disease related genes		PPL-100; Copper	(M3468)NABA ECM REGULATORS; (M5885)NABA MATRISOME ASSOCIATED; (M5889)NABA MATRISOME	(M5946)HALLMARK COAGULATION; (M5913)HALLMARK INTERFERON GAMMA RESPONSE; (M5921)HALLMARK COMPLEMENT	0	0	0	0	0	0	0	0	0	0	0	0	0	0	0	0	0	0	0	0
SETD2	29072	symbol	H. sapiens	29072	H. sapiens	SETD2	SET domain containing 2, histone lysine methyltransferase	GO:0035441 cell migration involved in vasculogenesis;GO:0097676 histone H3-K36 dimethylation;GO:0010793 regulation of mRNA export from nucleus		Disease related genes; ENZYME proteins:Transferases; Predicted intracellular proteins; Cancer-related genes:Mutational cancer driver genes; Potential drug targets; Cancer-related genes:Mutated cancer genes; Enzymes	Nuclear speckles (Approved); Additional: Cytosol				0	1	1	1	0	0	0	0	0	0	0	0	1	0	0	1	0	0	0	0
SF3A3	10946	symbol	H. sapiens	10946	H. sapiens	SF3A3	splicing factor 3a subunit 3	GO:1903241 U2-type prespliceosome assembly;GO:0000389 mRNA 3'-splice site recognition;GO:0006376 mRNA splice site selection		Predicted intracellular proteins	Nuclear speckles (Supported); Additional: Nucleoplasm	Phenethyl Isothiocyanate		(M5898)HALLMARK DNA REPAIR	0	0	0	0	1	0	0	0	0	0	0	0	0	0	0	0	0	0	0	0
SF3B1	23451	symbol	H. sapiens	23451	H. sapiens	SF3B1	splicing factor 3b subunit 1	GO:0000245 spliceosomal complex assembly;GO:0022618 ribonucleoprotein complex assembly;GO:0071826 ribonucleoprotein complex subunit organization		Cancer-related genes:Mutated cancer genes; Cancer-related genes:Mutational cancer driver genes; Predicted intracellular proteins	Nuclear speckles (Enhanced)	H3B-8800			0	0	0	0	1	0	0	0	0	0	0	0	0	0	0	0	0	0	0	0
SF3B4	10262	symbol	H. sapiens	10262	H. sapiens	SF3B4	splicing factor 3b subunit 4	GO:0048026 positive regulation of mRNA splicing, via spliceosome;GO:0050685 positive regulation of mRNA processing;GO:0033120 positive regulation of RNA splicing		Predicted intracellular proteins; Disease related genes	Nuclear speckles (Approved)				0	0	0	0	1	0	0	0	0	0	0	0	0	0	0	0	0	0	0	0
SGCB	6443	symbol	H. sapiens	6443	H. sapiens	SGCB	sarcoglycan beta	GO:0097084 vascular associated smooth muscle cell development;GO:0035886 vascular associated smooth muscle cell differentiation;GO:0051145 smooth muscle cell differentiation		Disease related genes	Cytosol (Approved)			(M5930)HALLMARK EPITHELIAL MESENCHYMAL TRANSITION	0	0	0	0	0	0	0	0	0	0	0	0	0	0	0	0	0	0	0	0
SGOL1	151648	gene_synonym	H. sapiens	151648	H. sapiens	SGO1	shugoshin 1	GO:0071962 mitotic sister chromatid cohesion, centromeric;GO:0007135 meiosis II;GO:0045144 meiotic sister chromatid segregation		Predicted intracellular proteins; Disease related genes	Nucleoplasm (Enhanced); Additional: Cytosol;Kinetochore		(M14)PID AURORA B PATHWAY; (M129)PID PLK1 PATHWAY		1	1	0	1	0	0	1	0	0	1	1	1	0	0	1	0	0	1	0	1
SGOL2	151246	gene_synonym	H. sapiens	151246	H. sapiens	SGO2	shugoshin 2	GO:0051754 meiotic sister chromatid cohesion, centromeric;GO:0007135 meiosis II;GO:0045144 meiotic sister chromatid segregation		Predicted intracellular proteins	Nucleoplasm (Enhanced); Additional: Nuclear bodies				1	1	0	0	0	0	1	0	0	0	0	0	0	0	0	0	0	0	0	1
SH3BP5-AS1	100505696	symbol	H. sapiens	100505696	H. sapiens	SH3BP5-AS1	SH3BP5 antisense RNA 1								0	0	0	0	0	0	0	0	0	0	0	0	0	0	0	0	0	0	0	0
SH3D21	79729	symbol	H. sapiens	79729	H. sapiens	SH3D21	SH3 domain containing 21			Predicted intracellular proteins	Nucleoplasm;Plasma membrane (Supported)				0	0	0	0	0	0	0	0	0	0	0	0	0	0	0	0	0	0	0	0
SH3KBP1	30011	symbol	H. sapiens	30011	H. sapiens	SH3KBP1	SH3 domain containing kinase binding protein 1	GO:0050871 positive regulation of B cell activation;GO:0008360 regulation of cell shape;GO:0050864 regulation of B cell activation		Predicted intracellular proteins	Cytosol (Supported)		(M214)PID ERBB1 INTERNALIZATION PATHWAY; (M48)PID MET PATHWAY		0	0	0	0	0	0	0	0	0	0	0	0	0	0	0	0	0	0	0	0
SHCBP1	79801	symbol	H. sapiens	79801	H. sapiens	SHCBP1	SHC binding and spindle associated 1	GO:0008543 fibroblast growth factor receptor signaling pathway;GO:2000177 regulation of neural precursor cell proliferation;GO:0044344 cellular response to fibroblast growth factor stimulus		Predicted intracellular proteins	Nuclear bodies (Approved); Additional: Microtubules;Midbody;Mitotic spindle				0	0	0	0	0	0	0	0	0	0	0	0	0	0	0	0	0	0	1	0
SIN3A	25942	symbol	H. sapiens	25942	H. sapiens	SIN3A	SIN3 transcription regulator family member A	GO:1901675 negative regulation of histone H3-K27 acetylation;GO:0051595 response to methylglyoxal;GO:0043974 histone H3-K27 acetylation		Cancer-related genes:Mutational cancer driver genes; Predicted intracellular proteins	Nucleoplasm (Enhanced)		(M219)PID HEDGEHOG GLI PATHWAY; (M101)PID HDAC CLASSI PATHWAY; (M105)PID TELOMERASE PATHWAY		0	1	0	0	0	1	0	1	1	0	0	0	1	0	0	0	1	1	0	0
SKA3	221150	symbol	H. sapiens	221150	H. sapiens	SKA3	spindle and kinetochore associated complex subunit 3	GO:0031110 regulation of microtubule polymerization or depolymerization;GO:0031109 microtubule polymerization or depolymerization;GO:0070507 regulation of microtubule cytoskeleton organization		Predicted intracellular proteins	Centrosome;Mitotic spindle (Supported); Additional: Cytosol				0	1	0	1	0	0	0	0	0	0	0	0	0	0	0	0	0	0	0	0
SLAIN2	57606	symbol	H. sapiens	57606	H. sapiens	SLAIN2	SLAIN motif family member 2	GO:0031116 positive regulation of microtubule polymerization;GO:0007020 microtubule nucleation;GO:0031112 positive regulation of microtubule polymerization or depolymerization		Predicted intracellular proteins	Centrosome (Enhanced); Additional: Cytosol				0	0	0	1	0	0	0	0	0	0	0	0	0	0	0	0	0	0	0	0
SLC25A27	9481	symbol	H. sapiens	9481	H. sapiens	SLC25A27	solute carrier family 25 member 27	GO:0051562 negative regulation of mitochondrial calcium ion concentration;GO:0035356 cellular triglyceride homeostasis;GO:0010917 negative regulation of mitochondrial membrane potential		Predicted intracellular proteins; Transporters:Electrochemical Potential-driven transporters	Mitochondria (Supported)				0	0	0	0	0	0	0	0	0	0	0	0	0	0	0	0	0	0	0	0
SLC25A40	55972	symbol	H. sapiens	55972	H. sapiens	SLC25A40	solute carrier family 25 member 40	GO:0055085 transmembrane transport;GO:0006810 transport;GO:0051234 establishment of localization		Transporters:Electrochemical Potential-driven transporters					0	0	0	0	0	0	0	0	0	0	0	0	0	0	0	0	0	0	0	0
SLC29A3	55315	symbol	H. sapiens	55315	H. sapiens	SLC29A3	solute carrier family 29 member 3	GO:1901642 nucleoside transmembrane transport;GO:0015858 nucleoside transport;GO:1901264 carbohydrate derivative transport		Potential drug targets; Disease related genes; Transporters:Electrochemical Potential-driven transporters	Golgi apparatus;Vesicles (Enhanced)			(M5956)HALLMARK KRAS SIGNALING DN	0	0	0	0	0	0	0	0	0	0	0	0	0	0	0	0	0	0	0	0
SLC39A6	25800	symbol	H. sapiens	25800	H. sapiens	SLC39A6	solute carrier family 39 member 6	GO:0071578 zinc ion import across plasma membrane;GO:0071577 zinc ion transmembrane transport;GO:0006829 zinc ion transport		Transporters:Electrochemical Potential-driven transporters	Cytosol (Uncertain); Additional: Nucleoplasm;Plasma membrane			(M5906)HALLMARK ESTROGEN RESPONSE EARLY	0	0	0	0	0	0	0	0	0	0	0	0	0	0	0	0	0	0	0	0
SLC41A1	254428	symbol	H. sapiens	254428	H. sapiens	SLC41A1	solute carrier family 41 member 1	GO:0010961 cellular magnesium ion homeostasis;GO:0071286 cellular response to magnesium ion;GO:0010960 magnesium ion homeostasis		Transporters:Transporter channels and pores	Mitochondria (Approved)				0	0	0	0	0	0	0	0	0	0	0	0	0	0	0	0	0	0	0	0
SLC43A3	29015	symbol	H. sapiens	29015	H. sapiens	SLC43A3	solute carrier family 43 member 3	GO:0055085 transmembrane transport;GO:0006810 transport;GO:0051234 establishment of localization		Predicted intracellular proteins; Transporters:Electrochemical Potential-driven transporters	Vesicles (Approved); Additional: Nucleoplasm;Plasma membrane				0	0	0	0	0	0	0	0	0	0	0	0	0	0	0	0	0	0	0	0
SLC4A8	9498	symbol	H. sapiens	9498	H. sapiens	SLC4A8	solute carrier family 4 member 8	GO:2000302 positive regulation of synaptic vesicle exocytosis;GO:0001956 positive regulation of neurotransmitter secretion;GO:0051590 positive regulation of neurotransmitter transport			Plasma membrane (Approved)				0	0	0	0	0	0	0	0	0	0	0	0	0	0	0	0	0	0	0	0
SLTM	79811	symbol	H. sapiens	79811	H. sapiens	SLTM	SAFB like transcription modulator	GO:0050684 regulation of mRNA processing;GO:1903311 regulation of mRNA metabolic process;GO:0006397 mRNA processing		Predicted intracellular proteins	Nuclear bodies;Nucleoplasm (Enhanced)				0	0	0	0	1	0	0	0	0	0	0	0	0	0	0	0	0	0	0	0
SMARCA5	8467	symbol	H. sapiens	8467	H. sapiens	SMARCA5	SWI/SNF related, matrix associated, actin dependent regulator of chromatin, subfamily a, member 5	GO:0000183 rDNA heterochromatin assembly;GO:1990700 nucleolar chromatin organization;GO:0007000 nucleolus organization		Predicted intracellular proteins; Transcription factors:Helix-turn-helix domains	Nucleoplasm (Supported); Additional: Nucleoli fibrillar center	Beta-D-Glucose; 4-Deoxy-Alpha-D-Glucose			1	0	1	0	0	0	0	0	0	0	0	0	0	0	0	0	0	1	1	1
SMARCAD1	56916	symbol	H. sapiens	56916	H. sapiens	SMARCAD1	SWI/SNF-related, matrix-associated actin-dependent regulator of chromatin, subfamily a, containing DEAD/H box 1	GO:0070933 histone H4 deacetylation;GO:0000729 DNA double-strand break processing;GO:0070932 histone H3 deacetylation		Disease related genes; Predicted intracellular proteins; Potential drug targets; ENZYME proteins:Hydrolases; Enzymes	Nucleoplasm (Enhanced)				0	1	1	0	0	0	0	0	0	0	0	0	1	0	0	0	0	0	0	0
SMARCAL1	50485	symbol	H. sapiens	50485	H. sapiens	SMARCAL1	SWI/SNF related, matrix associated, actin dependent regulator of chromatin, subfamily a like 1	GO:0048478 replication fork protection;GO:2000104 negative regulation of DNA-dependent DNA replication;GO:0001325 formation of extrachromosomal circular DNA		Predicted intracellular proteins; Disease related genes	Nucleoplasm (Supported)		(M46)PID ATR PATHWAY		0	0	1	0	0	1	0	0	0	0	0	0	0	0	0	0	0	0	0	0
SMC1A	8243	symbol	H. sapiens	8243	H. sapiens	SMC1A	structural maintenance of chromosomes 1A	GO:0072396 response to cell cycle checkpoint signaling;GO:0072402 response to DNA integrity checkpoint signaling;GO:0072423 response to DNA damage checkpoint signaling		Cancer-related genes:Mutated cancer genes; Cancer-related genes:Mutational cancer driver genes; Predicted intracellular proteins; Disease related genes	Nucleoplasm (Enhanced)		(M84)PID ATM PATHWAY	(M5893)HALLMARK MITOTIC SPINDLE; (M5901)HALLMARK G2M CHECKPOINT; (M5925)HALLMARK E2F TARGETS	1	1	1	1	1	0	1	1	0	0	0	1	0	0	0	0	0	0	0	1
SMC2	10592	symbol	H. sapiens	10592	H. sapiens	SMC2	structural maintenance of chromosomes 2	GO:0010032 meiotic chromosome condensation;GO:0007076 mitotic chromosome condensation;GO:0051383 kinetochore organization		Predicted intracellular proteins	Nucleoplasm (Supported); Additional: Nucleoli		(M14)PID AURORA B PATHWAY	(M5901)HALLMARK G2M CHECKPOINT	1	1	1	0	0	0	1	1	0	0	0	0	0	0	0	0	0	1	0	0
SMC3	9126	symbol	H. sapiens	9126	H. sapiens	SMC3	structural maintenance of chromosomes 3	GO:0007064 mitotic sister chromatid cohesion;GO:0007062 sister chromatid cohesion;GO:0090307 mitotic spindle assembly		Cancer-related genes:Mutated cancer genes; Cancer-related genes:Mutational cancer driver genes; Predicted intracellular proteins; Disease related genes	Nucleoplasm (Supported)		(M84)PID ATM PATHWAY	(M5893)HALLMARK MITOTIC SPINDLE; (M5925)HALLMARK E2F TARGETS	1	1	1	1	0	1	1	1	0	0	0	1	0	0	0	0	0	0	0	1
SMC4	10051	symbol	H. sapiens	10051	H. sapiens	SMC4	structural maintenance of chromosomes 4	GO:0010032 meiotic chromosome condensation;GO:0007076 mitotic chromosome condensation;GO:0051383 kinetochore organization		Predicted intracellular proteins	Cytosol;Nuclear speckles (Supported)		(M14)PID AURORA B PATHWAY	(M5893)HALLMARK MITOTIC SPINDLE; (M5901)HALLMARK G2M CHECKPOINT; (M5925)HALLMARK E2F TARGETS	1	1	1	0	0	0	1	0	0	0	0	0	0	0	0	0	0	1	0	0
SMC6	79677	symbol	H. sapiens	79677	H. sapiens	SMC6	structural maintenance of chromosomes 6	GO:0051984 positive regulation of chromosome segregation;GO:0000722 telomere maintenance via recombination;GO:0006312 mitotic recombination		Predicted intracellular proteins	Nucleoplasm (Supported)			(M5925)HALLMARK E2F TARGETS	0	1	1	0	0	0	0	0	0	0	0	0	0	0	0	0	0	0	0	0
SMG7	9887	symbol	H. sapiens	9887	H. sapiens	SMG7	SMG7 nonsense mediated mRNA decay factor	GO:0000184 nuclear-transcribed mRNA catabolic process, nonsense-mediated decay;GO:0006406 mRNA export from nucleus;GO:0071427 mRNA-containing ribonucleoprotein complex export from nucleus		Predicted intracellular proteins	Cytosol;Intermediate filaments (Supported)				0	0	0	0	1	0	0	0	0	0	0	0	0	0	0	0	0	0	0	0
SNAI2	6591	symbol	H. sapiens	6591	H. sapiens	SNAI2	snail family transcriptional repressor 2	GO:0035921 desmosome disassembly;GO:0070563 negative regulation of vitamin D receptor signaling pathway;GO:0003273 cell migration involved in endocardial cushion formation		Transcription factors:Zinc-coordinating DNA-binding domains; Predicted intracellular proteins; Disease related genes	Nucleoplasm (Approved)		(M231)PID KIT PATHWAY; (M223)PID BETA CATENIN NUC PATHWAY; (M145)PID P53 DOWNSTREAM PATHWAY	(M5942)HALLMARK UV RESPONSE DN; (M5930)HALLMARK EPITHELIAL MESENCHYMAL TRANSITION	0	0	1	0	0	0	0	0	0	0	0	0	0	0	0	0	1	0	0	0
SNHG1	23642	symbol	H. sapiens	23642	H. sapiens	SNHG1	small nucleolar RNA host gene 1	GO:0006396 RNA processing;GO:0016070 RNA metabolic process;GO:0090304 nucleic acid metabolic process							0	0	0	0	0	0	0	0	0	0	0	0	0	0	0	0	0	0	0	0
SNHG5	387066	symbol	H. sapiens	387066	H. sapiens	SNHG5	small nucleolar RNA host gene 5								0	0	0	0	0	0	0	0	0	0	0	0	0	0	0	0	0	0	0	0
SNRNP200	23020	symbol	H. sapiens	23020	H. sapiens	SNRNP200	small nuclear ribonucleoprotein U5 subunit 200	GO:0000388 spliceosome conformational change to release U4 (or U4atac) and U1 (or U11);GO:0000354 cis assembly of pre-catalytic spliceosome;GO:0000393 spliceosomal conformational changes to generate catalytic conformation		Disease related genes; Predicted intracellular proteins; Potential drug targets; ENZYME proteins:Hydrolases; Enzymes	Nucleoplasm (Supported)				0	0	0	0	1	0	0	0	0	0	0	0	0	0	0	0	0	0	0	0
SNRPB2	6629	symbol	H. sapiens	6629	H. sapiens	SNRPB2	small nuclear ribonucleoprotein polypeptide B2	GO:0000377 RNA splicing, via transesterification reactions with bulged adenosine as nucleophile;GO:0000398 mRNA splicing, via spliceosome;GO:0000375 RNA splicing, via transesterification reactions		Predicted intracellular proteins	Nuclear speckles (Supported); Additional: Cytoplasmic bodies			(M5926)HALLMARK MYC TARGETS V1	0	0	0	0	1	0	0	0	0	0	0	0	0	0	0	0	0	0	0	0
SNW1	22938	symbol	H. sapiens	22938	H. sapiens	SNW1	SNW domain containing 1	GO:0070564 positive regulation of vitamin D receptor signaling pathway;GO:0070562 regulation of vitamin D receptor signaling pathway;GO:0070561 vitamin D receptor signaling pathway		Predicted intracellular proteins	Nucleoplasm (Enhanced); Additional: Cytosol				0	0	1	0	1	0	0	0	0	0	0	0	1	0	0	0	0	0	0	0
SNX1	6642	symbol	H. sapiens	6642	H. sapiens	SNX1	sorting nexin 1	GO:0034498 early endosome to Golgi transport;GO:0072673 lamellipodium morphogenesis;GO:0097581 lamellipodium organization		Predicted intracellular proteins	Endosomes;Lysosomes (Enhanced)		(M238)PID THROMBIN PAR1 PATHWAY; (M142)PID AJDISS 2PATHWAY		0	0	0	0	0	0	0	0	0	0	0	0	0	0	0	0	0	0	0	0
SNX5	27131	symbol	H. sapiens	27131	H. sapiens	SNX5	sorting nexin 5	GO:0007174 epidermal growth factor catabolic process;GO:0035815 positive regulation of renal sodium excretion;GO:0035813 regulation of renal sodium excretion		Predicted intracellular proteins	Cytosol;Vesicles (Supported)				0	0	0	0	0	0	0	0	0	0	0	0	0	0	0	0	0	0	0	0
SOAT2	8435	symbol	H. sapiens	8435	H. sapiens	SOAT2	sterol O-acyltransferase 2	GO:0034379 very-low-density lipoprotein particle assembly;GO:0034433 steroid esterification;GO:0034434 sterol esterification		Enzymes; ENZYME proteins:Transferases		Hesperetin		(M5948)HALLMARK BILE ACID METABOLISM	0	0	0	0	0	0	0	0	0	0	0	0	0	0	0	0	0	0	0	0
SON	6651	symbol	H. sapiens	6651	H. sapiens	SON	SON DNA and RNA binding protein	GO:0000281 mitotic cytokinesis;GO:0061640 cytoskeleton-dependent cytokinesis;GO:0048024 regulation of mRNA splicing, via spliceosome		Transporters:Primary Active Transporters; Potential drug targets; Disease related genes; Predicted intracellular proteins	Nuclear speckles (Enhanced)				0	1	0	1	1	0	0	0	0	0	0	0	0	0	0	0	0	0	0	0
SOS1	6654	symbol	H. sapiens	6654	H. sapiens	SOS1	SOS Ras/Rac guanine nucleotide exchange factor 1	GO:1904693 midbrain morphogenesis;GO:0007296 vitellogenesis;GO:0003344 pericardium morphogenesis		Disease related genes; Predicted intracellular proteins; RAS pathway related proteins; Cancer-related genes:Mutational cancer driver genes; Cancer-related genes:Mutated cancer genes	Cytosol (Approved)		(M12771)SA PTEN PATHWAY; (M18895)SA TRKA RECEPTOR; (M206)PID PDGFRA PATHWAY	(M5893)HALLMARK MITOTIC SPINDLE	1	0	0	0	0	0	0	0	0	0	0	0	0	0	0	0	0	0	0	0
SPAG4	6676	symbol	H. sapiens	6676	H. sapiens	SPAG4	sperm associated antigen 4	GO:0006998 nuclear envelope organization;GO:0006997 nucleus organization;GO:0010256 endomembrane system organization		Predicted intracellular proteins				(M5937)HALLMARK GLYCOLYSIS	0	0	0	0	0	0	0	0	0	0	0	0	0	0	0	0	0	0	0	0
SPAG5	10615	symbol	H. sapiens	10615	H. sapiens	SPAG5	sperm associated antigen 5	GO:1905832 positive regulation of spindle assembly;GO:0090235 regulation of metaphase plate congression;GO:0051988 regulation of attachment of spindle microtubules to kinetochore		Predicted intracellular proteins	Mitotic spindle;Nuclear bodies (Supported); Additional: Cytosol			(M5925)HALLMARK E2F TARGETS	0	1	0	1	0	0	0	0	1	1	0	0	0	0	0	0	0	0	0	0
SPC25	57405	symbol	H. sapiens	57405	H. sapiens	SPC25	SPC25 component of NDC80 kinetochore complex	GO:0007052 mitotic spindle organization;GO:1902850 microtubule cytoskeleton organization involved in mitosis;GO:0007051 spindle organization		Predicted intracellular proteins	Cytosol (Enhanced)			(M5925)HALLMARK E2F TARGETS	1	1	0	1	0	0	0	0	0	0	0	0	0	0	0	0	0	0	0	0
SPEF2	79925	symbol	H. sapiens	79925	H. sapiens	SPEF2	sperm flagellar 2	GO:0007288 sperm axoneme assembly;GO:0120316 sperm flagellum assembly;GO:0048854 brain morphogenesis		Predicted intracellular proteins					0	0	0	1	0	0	0	0	0	0	0	0	0	0	0	0	0	0	0	0
SPICE1	152185	symbol	H. sapiens	152185	H. sapiens	SPICE1	spindle and centriole associated protein 1	GO:0046599 regulation of centriole replication;GO:0007099 centriole replication;GO:0010824 regulation of centrosome duplication		Predicted intracellular proteins	Centrosome (Supported)				0	1	0	1	0	0	0	0	0	1	0	0	0	0	1	0	0	0	0	0
SPIN1	10927	symbol	H. sapiens	10927	H. sapiens	SPIN1	spindlin 1	GO:0009303 rRNA transcription;GO:0098781 ncRNA transcription;GO:0030177 positive regulation of Wnt signaling pathway		Predicted intracellular proteins	Nucleoplasm (Supported)				0	0	0	0	0	0	1	0	0	0	0	0	0	0	0	0	0	0	0	0
SREK1	140890	symbol	H. sapiens	140890	H. sapiens	SREK1	splicing regulatory glutamic acid and lysine rich protein 1	GO:0008380 RNA splicing;GO:0006397 mRNA processing;GO:0016071 mRNA metabolic process		Predicted intracellular proteins	Nuclear speckles;Nucleoplasm (Enhanced)				0	0	0	0	1	0	0	0	0	0	0	0	0	0	0	0	0	0	0	0
SRGAP2	23380	symbol	H. sapiens	23380	H. sapiens	SRGAP2	SLIT-ROBO Rho GTPase activating protein 2	GO:0003363 lamellipodium assembly involved in ameboidal cell migration;GO:0021816 extension of a leading process involved in cell motility in cerebral cortex radial glia guided migration;GO:0021815 modulation of microtubule cytoskeleton involved in cerebral cortex radial glia guided migration		Predicted intracellular proteins; Disease related genes	Cytosol (Approved); Additional: Nucleoplasm				1	0	0	1	0	0	0	0	0	0	0	0	0	0	0	0	0	0	0	0
SRP72	6731	symbol	H. sapiens	6731	H. sapiens	SRP72	signal recognition particle 72	GO:0006614 SRP-dependent cotranslational protein targeting to membrane;GO:0006613 cotranslational protein targeting to membrane;GO:0045047 protein targeting to ER		Transporters:Primary Active Transporters; Potential drug targets; Disease related genes; Predicted intracellular proteins					0	0	0	0	0	0	0	0	0	0	0	0	0	0	0	0	0	0	0	0
SRSF11	9295	symbol	H. sapiens	9295	H. sapiens	SRSF11	serine and arginine rich splicing factor 11	GO:0008380 RNA splicing;GO:0006397 mRNA processing;GO:0016071 mRNA metabolic process		Predicted intracellular proteins	Nuclear speckles (Supported)				0	0	0	0	1	0	0	0	0	0	0	0	0	0	0	0	0	0	0	0
SS18	6760	symbol	H. sapiens	6760	H. sapiens	SS18	SS18 subunit of BAF chromatin remodeling complex	GO:0097150 neuronal stem cell population maintenance;GO:0048013 ephrin receptor signaling pathway;GO:0019827 stem cell population maintenance		Predicted intracellular proteins; Disease related genes; Cancer-related genes	Nucleoplasm (Approved); Additional: Cytosol			(M5901)HALLMARK G2M CHECKPOINT	0	0	0	1	0	0	0	0	0	0	0	0	0	0	0	0	0	0	0	0
SSR2	6746	symbol	H. sapiens	6746	H. sapiens	SSR2	signal sequence receptor subunit 2	GO:0006613 cotranslational protein targeting to membrane;GO:0006612 protein targeting to membrane;GO:0090150 establishment of protein localization to membrane		Predicted intracellular proteins					0	0	0	0	0	0	0	0	0	0	0	0	0	0	0	0	0	0	0	0
SSRP1	6749	symbol	H. sapiens	6749	H. sapiens	SSRP1	structure specific recognition protein 1	GO:1902275 regulation of chromatin organization;GO:0006260 DNA replication;GO:0006325 chromatin organization		Predicted intracellular proteins; Transcription factors:Other all-alpha-helical DNA-binding domains	Cytosol (Approved); Additional: Nucleoplasm		(M256)PID TAP63 PATHWAY	(M5898)HALLMARK DNA REPAIR; (M5925)HALLMARK E2F TARGETS	0	0	1	0	0	1	0	0	0	0	0	0	0	0	0	0	0	0	1	0
STAM-AS1	102723166	gene_synonym	H. sapiens	102723166	H. sapiens	STAM-DT	STAM divergent transcript								0	0	0	0	0	0	0	0	0	0	0	0	0	0	0	0	0	0	0	0
STARD9	57519	symbol	H. sapiens	57519	H. sapiens	STARD9	StAR related lipid transfer domain containing 9	GO:0051225 spindle assembly;GO:0007051 spindle organization;GO:0007018 microtubule-based movement		Predicted intracellular proteins					0	0	0	1	0	0	0	0	0	0	0	0	0	0	0	0	0	0	0	0
STIL	6491	symbol	H. sapiens	6491	H. sapiens	STIL	STIL centriolar assembly protein	GO:0033504 floor plate development;GO:0030903 notochord development;GO:0046599 regulation of centriole replication		Predicted intracellular proteins; Disease related genes; Cancer-related genes	Cytosol;Plasma membrane (Approved)		(M211)PID HEDGEHOG 2PATHWAY	(M5901)HALLMARK G2M CHECKPOINT; (M5907)HALLMARK ESTROGEN RESPONSE LATE	0	1	0	1	0	0	0	0	0	0	0	0	0	0	1	0	0	0	0	0
STK36	27148	symbol	H. sapiens	27148	H. sapiens	STK36	serine/threonine kinase 36	GO:0007227 signal transduction downstream of smoothened;GO:0007228 positive regulation of hh target transcription factor activity;GO:0003351 epithelial cilium movement involved in extracellular fluid movement	Other	Predicted intracellular proteins; Enzymes; Kinases; ENZYME proteins:Transferases	Cytosol (Supported)	Fostamatinib	(M219)PID HEDGEHOG GLI PATHWAY		0	0	0	0	0	0	0	0	0	0	0	0	0	0	0	0	0	0	0	0
STMN1	3925	symbol	H. sapiens	3925	H. sapiens	STMN1	stathmin 1	GO:0070494 regulation of thrombin-activated receptor signaling pathway;GO:0070495 negative regulation of thrombin-activated receptor signaling pathway;GO:1905098 negative regulation of guanyl-nucleotide exchange factor activity		Predicted intracellular proteins; Cancer-related genes:Candidate cancer biomarkers	Cytosol (Approved)		(M209)PID P38 GAMMA DELTA PATHWAY; (M14)PID AURORA B PATHWAY	(M5901)HALLMARK G2M CHECKPOINT; (M5925)HALLMARK E2F TARGETS; (M5937)HALLMARK GLYCOLYSIS	0	1	0	1	0	0	0	1	0	0	0	0	0	0	0	0	0	1	0	0
STPG1	90529	symbol	H. sapiens	90529	H. sapiens	STPG1	sperm tail PG-rich repeat containing 1	GO:1902110 positive regulation of mitochondrial membrane permeability involved in apoptotic process;GO:1902686 mitochondrial outer membrane permeabilization involved in programmed cell death;GO:0035794 positive regulation of mitochondrial membrane permeability		Predicted intracellular proteins	Nucleoplasm (Approved)				0	0	0	0	0	0	0	0	0	0	0	0	0	0	0	0	0	0	0	0
STRN	6801	symbol	H. sapiens	6801	H. sapiens	STRN	striatin	GO:0070830 bicellular tight junction assembly;GO:0120192 tight junction assembly;GO:0043297 apical junction assembly		Predicted intracellular proteins; Cancer-related genes	Cytosol (Approved); Additional: Nucleoplasm		(M41)PID ER NONGENOMIC PATHWAY	(M5953)HALLMARK KRAS SIGNALING UP	0	0	0	0	0	0	0	0	0	0	0	0	0	0	0	0	0	0	0	0
STT3A	3703	symbol	H. sapiens	3703	H. sapiens	STT3A	STT3 oligosaccharyltransferase complex catalytic subunit A	GO:0043686 co-translational protein modification;GO:0018279 protein N-linked glycosylation via asparagine;GO:0018196 peptidyl-asparagine modification		Disease related genes; ENZYME proteins:Transferases; Potential drug targets; Cancer-related genes:Candidate cancer biomarkers; Enzymes	Cytosol;Nucleoplasm (Uncertain); Additional: Vesicles				0	0	0	0	0	0	0	0	0	0	0	0	0	0	0	0	0	0	0	0
SUGP2	10147	symbol	H. sapiens	10147	H. sapiens	SUGP2	SURP and G-patch domain containing 2	GO:0008380 RNA splicing;GO:0006397 mRNA processing;GO:0016071 mRNA metabolic process		Predicted intracellular proteins	Nucleoplasm (Enhanced); Additional: Nuclear bodies				0	0	0	0	1	0	0	0	0	0	0	0	0	0	0	0	0	0	0	0
SUPT16H	11198	symbol	H. sapiens	11198	H. sapiens	SUPT16H	SPT16 homolog, facilitates chromatin remodeling subunit	GO:0032968 positive regulation of transcription elongation from RNA polymerase II promoter;GO:0006337 nucleosome disassembly;GO:0031498 chromatin disassembly		Predicted intracellular proteins; Peptidases:Metallopeptidases; Enzymes	Nucleoplasm (Supported); Additional: Nucleoli fibrillar center				0	0	1	0	0	1	0	0	0	0	0	0	0	0	0	0	0	0	1	0
SUPT20H	55578	symbol	H. sapiens	55578	H. sapiens	SUPT20H	SPT20 homolog, SAGA complex component	GO:0007369 gastrulation;GO:0006914 autophagy;GO:0061919 process utilizing autophagic mechanism		Predicted intracellular proteins	Nucleoli fibrillar center (Approved)				0	0	0	0	0	0	0	0	0	0	0	0	1	0	0	0	0	0	0	0
SUPT3H	8464	symbol	H. sapiens	8464	H. sapiens	SUPT3H	SPT3 homolog, SAGA and STAGA complex component	GO:0016578 histone deubiquitination;GO:0043966 histone H3 acetylation;GO:0016579 protein deubiquitination		Predicted intracellular proteins	Nucleoplasm (Supported)		(M139)PID MYC PATHWAY; (M66)PID MYC ACTIV PATHWAY		0	0	0	0	0	0	0	0	0	0	0	0	1	0	0	0	0	0	0	0
SWT1	54823	symbol	H. sapiens	54823	H. sapiens	SWT1	SWT1 RNA endoribonuclease homolog			Predicted intracellular proteins	Cytosol (Approved)				0	0	0	0	0	0	0	0	0	0	0	0	0	0	0	0	0	0	0	0
SYCP2	10388	symbol	H. sapiens	10388	H. sapiens	SYCP2	synaptonemal complex protein 2	GO:0000080 mitotic G1 phase;GO:0022403 cell cycle phase;GO:0051318 G1 phase		Predicted intracellular proteins	Nucleoplasm (Supported); Additional: Cytosol;Plasma membrane				1	1	0	0	0	0	1	0	0	0	0	0	0	0	0	0	0	0	0	0
SYN3	8224	symbol	H. sapiens	8224	H. sapiens	SYN3	synapsin III	GO:0097091 synaptic vesicle clustering;GO:0032228 regulation of synaptic transmission, GABAergic;GO:0051932 synaptic transmission, GABAergic		Predicted intracellular proteins					0	0	0	0	0	0	0	0	0	1	0	0	0	0	0	0	0	0	0	0
SYNCRIP	10492	symbol	H. sapiens	10492	H. sapiens	SYNCRIP	synaptotagmin binding cytoplasmic RNA interacting protein	GO:0070934 CRD-mediated mRNA stabilization;GO:0048255 mRNA stabilization;GO:1902373 negative regulation of mRNA catabolic process		Predicted intracellular proteins	Nucleoplasm (Approved); Additional: Cytosol;Vesicles			(M5901)HALLMARK G2M CHECKPOINT; (M5925)HALLMARK E2F TARGETS; (M5926)HALLMARK MYC TARGETS V1	0	0	0	0	1	0	0	0	0	0	0	0	0	0	0	0	0	0	0	0
SYNGAP1	8831	symbol	H. sapiens	8831	H. sapiens	SYNGAP1	synaptic Ras GTPase activating protein 1	GO:0098880 maintenance of postsynaptic specialization structure;GO:0099558 maintenance of synapse structure;GO:0048169 regulation of long-term neuronal synaptic plasticity		Predicted intracellular proteins; Disease related genes; RAS pathway related proteins	Nucleoplasm (Approved)		(M269)PID RAS PATHWAY		0	1	0	0	0	0	0	0	0	0	0	0	0	0	0	0	0	0	0	0
SYNJ1	8867	symbol	H. sapiens	8867	H. sapiens	SYNJ1	synaptojanin 1	GO:1904980 positive regulation of endosome organization;GO:1904978 regulation of endosome organization;GO:0016191 synaptic vesicle uncoating		Disease related genes; Predicted intracellular proteins; Potential drug targets; ENZYME proteins:Hydrolases; Enzymes	Cytosol;Nucleoplasm (Approved); Additional: Centrosome		(M62)PID EPHB FWD PATHWAY; (M214)PID ERBB1 INTERNALIZATION PATHWAY	(M5945)HALLMARK HEME METABOLISM	0	0	0	0	0	0	0	0	0	1	0	0	0	0	0	0	0	0	0	0
SYNRG	11276	symbol	H. sapiens	11276	H. sapiens	SYNRG	synergin gamma	GO:0006897 endocytosis;GO:0006886 intracellular protein transport;GO:0046907 intracellular transport		Predicted intracellular proteins	Cytosol (Approved)				0	0	0	0	0	0	0	0	0	0	0	0	0	0	0	0	0	0	0	0
TAB2	23118	symbol	H. sapiens	23118	H. sapiens	TAB2	TGF-beta activated kinase 1 (MAP3K7) binding protein 2	GO:0010507 negative regulation of autophagy;GO:0043123 positive regulation of I-kappaB kinase/NF-kappaB signaling;GO:0043122 regulation of I-kappaB kinase/NF-kappaB signaling		Predicted intracellular proteins; Disease related genes			(M20)PID P38 MKK3 6PATHWAY; (M23)PID WNT NONCANONICAL PATHWAY; (M110)PID IL1 PATHWAY		0	0	0	0	0	0	0	0	0	0	0	0	0	0	0	0	0	0	0	0
TAB3	257397	symbol	H. sapiens	257397	H. sapiens	TAB3	TGF-beta activated kinase 1 (MAP3K7) binding protein 3	GO:0010507 negative regulation of autophagy;GO:0043123 positive regulation of I-kappaB kinase/NF-kappaB signaling;GO:0043122 regulation of I-kappaB kinase/NF-kappaB signaling		Predicted intracellular proteins	Cytosol;Nuclear speckles (Approved)				0	0	0	0	0	0	0	0	0	0	0	0	0	0	0	0	0	0	0	0
TACC3	10460	symbol	H. sapiens	10460	H. sapiens	TACC3	transforming acidic coiled-coil containing protein 3	GO:0060236 regulation of mitotic spindle organization;GO:0090224 regulation of spindle organization;GO:0007091 metaphase/anaphase transition of mitotic cell cycle		Predicted intracellular proteins	Centriolar satellite;Cytosol;Mitotic spindle (Enhanced); Additional: Vesicles		(M242)PID AURORA A PATHWAY; (M71)PID ILK PATHWAY	(M5901)HALLMARK G2M CHECKPOINT; (M5925)HALLMARK E2F TARGETS	0	1	0	1	0	0	0	0	0	0	0	0	0	0	0	0	0	0	0	0
TAF1A	9015	symbol	H. sapiens	9015	H. sapiens	TAF1A	TATA-box binding protein associated factor, RNA polymerase I subunit A	GO:0006360 transcription by RNA polymerase I;GO:0006366 transcription by RNA polymerase II;GO:0006351 transcription, DNA-templated		Predicted intracellular proteins	Nucleoplasm (Supported)				0	0	0	0	0	0	0	0	0	0	0	0	0	0	0	0	0	0	0	0
TAF1B	9014	symbol	H. sapiens	9014	H. sapiens	TAF1B	TATA-box binding protein associated factor, RNA polymerase I subunit B	GO:0001188 RNA polymerase I preinitiation complex assembly;GO:0006361 transcription initiation from RNA polymerase I promoter;GO:0042790 nucleolar large rRNA transcription by RNA polymerase I		Predicted intracellular proteins	Nucleoli (Supported); Additional: Nucleoplasm				0	0	0	0	0	0	0	0	0	0	0	0	0	0	0	0	0	0	0	0
TAF9	6880	symbol	H. sapiens	6880	H. sapiens	TAF9	TATA-box binding protein associated factor 9	GO:0000492 box C/D snoRNP assembly;GO:0000491 small nucleolar ribonucleoprotein complex assembly;GO:1902166 negative regulation of intrinsic apoptotic signaling pathway in response to DNA damage by p53 class mediator		Predicted intracellular proteins	Nucleoplasm (Enhanced)		(M139)PID MYC PATHWAY; (M66)PID MYC ACTIV PATHWAY; (M145)PID P53 DOWNSTREAM PATHWAY	(M5898)HALLMARK DNA REPAIR	0	0	1	0	0	0	0	0	0	0	0	0	1	0	0	0	0	0	0	0
TARDBP	23435	symbol	H. sapiens	23435	H. sapiens	TARDBP	TAR DNA binding protein	GO:0071765 nuclear inner membrane organization;GO:0043922 negative regulation by host of viral transcription;GO:0061158 3'-UTR-mediated mRNA destabilization		Predicted intracellular proteins; Disease related genes	Nucleoplasm (Enhanced)			(M5926)HALLMARK MYC TARGETS V1	0	0	0	0	1	0	0	0	0	0	0	0	0	0	0	0	0	0	0	0
TATDN2	9797	symbol	H. sapiens	9797	H. sapiens	TATDN2	TatD DNase domain containing 2	GO:0090305 nucleic acid phosphodiester bond hydrolysis;GO:0090304 nucleic acid metabolic process;GO:0006139 nucleobase-containing compound metabolic process		Predicted intracellular proteins	Nuclear speckles (Approved)			(M5922)HALLMARK UNFOLDED PROTEIN RESPONSE	0	0	0	0	0	0	0	0	0	0	0	0	0	0	0	0	0	0	0	0
TBC1D15	64786	symbol	H. sapiens	64786	H. sapiens	TBC1D15	TBC1 domain family member 15	GO:1902017 regulation of cilium assembly;GO:0090630 activation of GTPase activity;GO:1902115 regulation of organelle assembly		Predicted intracellular proteins	Cytosol;Mitochondria (Supported)				0	0	0	0	0	0	0	0	0	0	0	0	0	0	0	0	0	0	0	0
TBC1D8B	54885	symbol	H. sapiens	54885	H. sapiens	TBC1D8B	TBC1 domain family member 8B	GO:0003094 glomerular filtration;GO:0097205 renal filtration;GO:0003014 renal system process		Predicted intracellular proteins	Cytosol (Approved)				0	0	0	0	0	0	0	0	0	0	0	0	0	0	0	0	0	0	0	0
TBCE	6905	symbol	H. sapiens	6905	H. sapiens	TBCE	tubulin folding cofactor E	GO:0007023 post-chaperonin tubulin folding pathway;GO:0007021 tubulin complex assembly;GO:0007052 mitotic spindle organization		Predicted intracellular proteins; Disease related genes					0	1	0	1	0	0	0	0	0	0	0	0	0	0	0	0	0	0	0	0
TBP	6908	symbol	H. sapiens	6908	H. sapiens	TBP	TATA-box binding protein	GO:0051123 RNA polymerase II preinitiation complex assembly;GO:0070897 transcription preinitiation complex assembly;GO:0006383 transcription by RNA polymerase III		Transcription factors:beta-Sheet binding to DNA; Predicted intracellular proteins; Disease related genes	Nucleoplasm (Supported)		(M254)PID MYC REPRESS PATHWAY; (M279)PID RB 1PATHWAY; (M115)PID REG GR PATHWAY		0	0	1	0	0	0	0	0	0	0	0	0	0	0	0	0	0	0	0	1
TCEANC2	127428	symbol	H. sapiens	127428	H. sapiens	TCEANC2	transcription elongation factor A N-terminal and central domain containing 2	GO:0006351 transcription, DNA-templated;GO:0097659 nucleic acid-templated transcription;GO:0032774 RNA biosynthetic process		Predicted intracellular proteins	Nucleoplasm (Approved); Additional: Vesicles				0	0	0	0	0	0	0	0	0	0	0	0	0	0	0	0	0	0	0	0
TCERG1	10915	symbol	H. sapiens	10915	H. sapiens	TCERG1	transcription elongation regulator 1	GO:0032968 positive regulation of transcription elongation from RNA polymerase II promoter;GO:0034244 negative regulation of transcription elongation from RNA polymerase II promoter;GO:0032785 negative regulation of DNA-templated transcription, elongation		Predicted intracellular proteins	Nucleoplasm (Enhanced)				0	0	0	0	1	0	0	0	0	0	0	0	0	0	0	0	0	0	0	0
TCTN3	26123	symbol	H. sapiens	26123	H. sapiens	TCTN3	tectonic family member 3	GO:0007224 smoothened signaling pathway;GO:0060271 cilium assembly;GO:0044782 cilium organization		Predicted intracellular proteins; Disease related genes	Microtubules (Approved)				0	0	0	0	0	0	0	0	0	0	0	0	0	1	0	0	0	0	0	0
TDP1	55775	symbol	H. sapiens	55775	H. sapiens	TDP1	tyrosyl-DNA phosphodiesterase 1	GO:0000012 single strand break repair;GO:0006302 double-strand break repair;GO:0090305 nucleic acid phosphodiester bond hydrolysis		Predicted intracellular proteins; Disease related genes	Nucleoplasm (Supported); Additional: Plasma membrane				0	0	1	0	0	0	0	0	0	0	0	0	0	0	0	0	0	0	0	0
TDRD7	23424	symbol	H. sapiens	23424	H. sapiens	TDRD7	tudor domain containing 7	GO:0002089 lens morphogenesis in camera-type eye;GO:0070306 lens fiber cell differentiation;GO:0002088 lens development in camera-type eye		Predicted intracellular proteins; Disease related genes	Cytoplasmic bodies (Supported); Additional: Nucleoplasm		(M242)PID AURORA A PATHWAY	(M5911)HALLMARK INTERFERON ALPHA RESPONSE; (M5913)HALLMARK INTERFERON GAMMA RESPONSE	0	0	0	0	0	0	0	0	0	0	0	0	0	0	0	0	0	0	0	0
TEX261	113419	symbol	H. sapiens	113419	H. sapiens	TEX261	testis expressed 261	GO:0006888 endoplasmic reticulum to Golgi vesicle-mediated transport;GO:0048193 Golgi vesicle transport;GO:0043065 positive regulation of apoptotic process			Cytosol;Nucleoplasm (Approved)				0	0	0	0	0	0	0	0	0	0	0	0	0	0	0	0	0	0	0	0
TEX30	93081	symbol	H. sapiens	93081	H. sapiens	TEX30	testis expressed 30			Predicted intracellular proteins					0	0	0	0	0	0	0	0	0	0	0	0	0	0	0	0	0	0	0	0
TFCP2	7024	symbol	H. sapiens	7024	H. sapiens	TFCP2	transcription factor CP2	GO:0042789 mRNA transcription by RNA polymerase II;GO:0009299 mRNA transcription;GO:0016071 mRNA metabolic process		Predicted intracellular proteins; Transcription factors:Immunoglobulin fold	Nucleoplasm (Supported); Additional: Cytosol		(M101)PID HDAC CLASSI PATHWAY		0	0	0	0	1	0	0	0	0	0	0	0	0	0	0	0	0	0	0	0
TFDP1	7027	symbol	H. sapiens	7027	H. sapiens	TFDP1	transcription factor Dp-1	GO:0070345 negative regulation of fat cell proliferation;GO:0070341 fat cell proliferation;GO:0070344 regulation of fat cell proliferation		Cancer-related genes:Mutational cancer driver genes; Predicted intracellular proteins; Transcription factors:Helix-turn-helix domains; Cancer-related genes:Candidate cancer biomarkers	Nucleoplasm (Supported); Additional: Cytosol		(M279)PID RB 1PATHWAY; (M40)PID E2F PATHWAY; (M2)PID SMAD2 3NUCLEAR PATHWAY	(M5901)HALLMARK G2M CHECKPOINT; (M5926)HALLMARK MYC TARGETS V1	1	1	1	0	0	0	0	1	1	0	0	1	0	0	0	0	0	0	0	0
TFR2	7036	symbol	H. sapiens	7036	H. sapiens	TFR2	transferrin receptor 2	GO:0140298 endocytic iron import into cell;GO:0071281 cellular response to iron ion;GO:0033572 transferrin transport		Disease related genes; Transporters; Potential drug targets; Peptidases:Metallopeptidases; Enzymes	Golgi apparatus (Approved)				0	0	0	0	0	0	0	0	0	0	0	0	0	0	0	0	0	0	0	0
TGOLN2	10618	symbol	H. sapiens	10618	H. sapiens	TGOLN2	trans-golgi network protein 2				Golgi apparatus (Enhanced); Additional: Nucleoplasm				0	0	0	0	0	0	0	0	0	0	0	0	0	0	0	0	0	0	0	0
THOC1	9984	symbol	H. sapiens	9984	H. sapiens	THOC1	THO complex 1	GO:0048297 negative regulation of isotype switching to IgA isotypes;GO:0045829 negative regulation of isotype switching;GO:2000002 negative regulation of DNA damage checkpoint		Predicted intracellular proteins	Nuclear speckles (Enhanced)				0	1	1	0	1	1	0	0	1	0	0	0	0	0	0	0	1	0	0	0
THOC2	57187	symbol	H. sapiens	57187	H. sapiens	THOC2	THO complex 2	GO:0046784 viral mRNA export from host cell nucleus;GO:0044417 translocation of molecules into host;GO:0016973 poly(A)+ mRNA export from nucleus		Predicted intracellular proteins; Disease related genes	Nucleoplasm (Approved)				0	1	0	0	1	0	0	0	0	0	0	0	0	0	0	0	0	0	0	0
THOC7	80145	symbol	H. sapiens	80145	H. sapiens	THOC7	THO complex 7	GO:0046784 viral mRNA export from host cell nucleus;GO:0044417 translocation of molecules into host;GO:0006406 mRNA export from nucleus		Predicted intracellular proteins	Cytosol;Nuclear speckles (Supported)				0	0	0	0	1	0	0	0	0	0	0	0	0	0	0	0	0	0	0	0
THUMPD3	25917	symbol	H. sapiens	25917	H. sapiens	THUMPD3	THUMP domain containing 3	GO:0030488 tRNA methylation;GO:0001510 RNA methylation;GO:0006400 tRNA modification		Predicted intracellular proteins	Cytosol (Enhanced); Additional: Nucleoli				0	0	0	0	0	0	0	0	0	0	0	0	0	0	0	0	0	0	0	0
TIAL1	7073	symbol	H. sapiens	7073	H. sapiens	TIAL1	TIA1 cytotoxic granule associated RNA binding protein like 1	GO:0035332 positive regulation of hippo signaling;GO:0035330 regulation of hippo signaling;GO:0017145 stem cell division		Predicted intracellular proteins	Nucleoplasm;Vesicles (Approved)			(M5915)HALLMARK APICAL JUNCTION	0	1	0	0	0	0	0	0	0	0	0	0	0	0	0	0	0	0	0	0
TICRR	90381	symbol	H. sapiens	90381	H. sapiens	TICRR	TOPBP1 interacting checkpoint and replication regulator	GO:0030174 regulation of DNA-dependent DNA replication initiation;GO:0033314 mitotic DNA replication checkpoint signaling;GO:0000076 DNA replication checkpoint signaling		Predicted intracellular proteins	Nucleoplasm (Supported)				0	1	1	0	0	1	0	1	0	0	0	0	0	0	0	0	1	0	0	0
TIMELESS	8914	symbol	H. sapiens	8914	H. sapiens	TIMELESS	timeless circadian regulator	GO:1904975 response to bleomycin;GO:1904976 cellular response to bleomycin;GO:0043111 replication fork arrest		Predicted intracellular proteins	Nucleoplasm (Supported)		(M95)PID CIRCADIAN PATHWAY; (M46)PID ATR PATHWAY	(M5925)HALLMARK E2F TARGETS	0	1	1	0	0	1	0	0	0	0	0	0	0	0	0	0	1	0	0	0
TIMM23	100287932	symbol	H. sapiens	100287932	H. sapiens	TIMM23	translocase of inner mitochondrial membrane 23	GO:0030150 protein import into mitochondrial matrix;GO:0044743 protein transmembrane import into intracellular organelle;GO:0065002 intracellular protein transmembrane transport			Mitochondria (Supported)				0	0	0	0	0	0	0	0	0	0	0	0	0	0	0	0	0	0	0	0
TIMM9	26520	symbol	H. sapiens	26520	H. sapiens	TIMM9	translocase of inner mitochondrial membrane 9	GO:0045039 protein insertion into mitochondrial inner membrane;GO:0051204 protein insertion into mitochondrial membrane;GO:0090151 establishment of protein localization to mitochondrial membrane		Predicted intracellular proteins	Mitochondria (Supported)			(M5936)HALLMARK OXIDATIVE PHOSPHORYLATION	0	0	0	0	0	0	0	0	0	0	0	0	0	0	0	0	0	0	0	0
TIMP3	7078	symbol	H. sapiens	7078	H. sapiens	TIMP3	TIMP metallopeptidase inhibitor 3	GO:1903984 positive regulation of TRAIL-activated apoptotic signaling pathway;GO:1903121 regulation of TRAIL-activated apoptotic signaling pathway;GO:0051045 negative regulation of membrane protein ectodomain proteolysis		Disease related genes; Predicted secreted proteins; Cancer-related genes:Candidate cancer biomarkers		Pimagedine	(M3468)NABA ECM REGULATORS; (M5885)NABA MATRISOME ASSOCIATED; (M5889)NABA MATRISOME	(M5946)HALLMARK COAGULATION; (M5902)HALLMARK APOPTOSIS; (M5930)HALLMARK EPITHELIAL MESENCHYMAL TRANSITION	0	0	0	0	0	0	0	0	0	0	0	0	0	0	0	0	0	0	0	0
TMBIM6	7009	symbol	H. sapiens	7009	H. sapiens	TMBIM6	transmembrane BAX inhibitor motif containing 6	GO:0060701 negative regulation of ribonuclease activity;GO:0060702 negative regulation of endoribonuclease activity;GO:0060699 regulation of endoribonuclease activity		Predicted intracellular proteins; Transporters:Transporter channels and pores				(M5941)HALLMARK UV RESPONSE UP; (M5934)HALLMARK XENOBIOTIC METABOLISM	0	0	0	0	1	0	0	0	0	0	0	0	0	0	0	0	0	0	0	0
TMEM106C	79022	symbol	H. sapiens	79022	H. sapiens	TMEM106C	transmembrane protein 106C	GO:0008150 biological_process		Predicted intracellular proteins					0	0	0	0	0	0	0	0	0	0	0	0	0	0	0	0	0	0	0	0
TMEM131	23505	symbol	H. sapiens	23505	H. sapiens	TMEM131	transmembrane protein 131	GO:0008150 biological_process		Predicted intracellular proteins	Intermediate filaments;Vesicles (Uncertain)				0	0	0	0	0	0	0	0	0	0	0	0	0	0	0	0	0	0	0	0
TMEM254	80195	symbol	H. sapiens	80195	H. sapiens	TMEM254	transmembrane protein 254				Plasma membrane (Approved); Additional: Nucleoplasm				0	0	0	0	0	0	0	0	0	0	0	0	0	0	0	0	0	0	0	0
TMEM67	91147	symbol	H. sapiens	91147	H. sapiens	TMEM67	transmembrane protein 67	GO:0010826 negative regulation of centrosome duplication;GO:0046606 negative regulation of centrosome cycle;GO:0010824 regulation of centrosome duplication		Transporters; Potential drug targets; Disease related genes; Predicted intracellular proteins					0	1	0	1	0	0	0	0	0	0	0	0	0	1	1	0	0	0	0	0
TMSB15B	286527	symbol	H. sapiens	286527	H. sapiens	TMSB15B	thymosin beta 15B	GO:0042989 sequestering of actin monomers;GO:0030837 negative regulation of actin filament polymerization;GO:0032507 maintenance of protein location in cell		Predicted intracellular proteins					0	1	0	0	0	0	0	0	0	0	0	0	0	0	0	0	0	0	0	0
TNRC6A	27327	symbol	H. sapiens	27327	H. sapiens	TNRC6A	trinucleotide repeat containing adaptor 6A	GO:0060213 positive regulation of nuclear-transcribed mRNA poly(A) tail shortening;GO:0060211 regulation of nuclear-transcribed mRNA poly(A) tail shortening;GO:0000289 nuclear-transcribed mRNA poly(A) tail shortening		Predicted intracellular proteins	Golgi apparatus;Nucleoplasm;Vesicles (Approved)				0	0	1	0	1	0	0	0	0	0	0	0	0	0	0	0	0	0	0	0
TOE1	114034	symbol	H. sapiens	114034	H. sapiens	TOE1	target of EGR1, exonuclease	GO:0034472 snRNA 3'-end processing;GO:0016180 snRNA processing;GO:0090503 RNA phosphodiester bond hydrolysis, exonucleolytic		Predicted intracellular proteins; Disease related genes	Nuclear bodies (Enhanced); Additional: Nucleoplasm				0	0	0	0	0	0	0	0	0	0	0	0	0	0	0	0	0	0	0	0
TOMM6	100188893	symbol	H. sapiens	100188893	H. sapiens	TOMM6	translocase of outer mitochondrial membrane 6	GO:0015031 protein transport;GO:0045184 establishment of protein localization;GO:0071705 nitrogen compound transport		Predicted intracellular proteins	Mitochondria (Supported)				0	0	0	0	0	0	0	0	0	0	0	0	0	0	0	0	0	0	0	0
TOP2A	7153	symbol	H. sapiens	7153	H. sapiens	TOP2A	DNA topoisomerase II alpha	GO:0045870 positive regulation of single stranded viral RNA replication via double stranded DNA intermediate;GO:1905463 negative regulation of DNA duplex unwinding;GO:0030263 apoptotic chromosome condensation		Predicted intracellular proteins; Cancer-related genes:Candidate cancer biomarkers; FDA approved drug targets:Small molecule drugs; ENZYME proteins:Isomerase; Enzymes	Nucleoplasm (Supported); Additional: Nucleoli	Moxifloxacin; Amsacrine; Dexrazoxane; Valrubicin; Teniposide; Epirubicin; Enoxacin; Pefloxacin; Ciprofloxacin; Trovafloxacin; Daunorubicin; Etoposide; Dactinomycin; Lomefloxacin; Doxorubicin; Norfloxacin; Ofloxacin; Idarubicin; Podofilox; Mitoxantrone; Sparfloxacin; Genistein; Fleroxacin; Lucanthone; Banoxantrone; SP1049C; Amonafide; Elsamitrucin; 13-deoxydoxorubicin; RTA 744; Aldoxorubicin; ZEN-…	(M236)PID DELTA NP63 PATHWAY	(M5949)HALLMARK PEROXISOME; (M5902)HALLMARK APOPTOSIS; (M5893)HALLMARK MITOTIC SPINDLE	1	1	1	0	0	0	1	1	0	0	0	0	0	0	0	0	0	1	0	0
TOPBP1	11073	symbol	H. sapiens	11073	H. sapiens	TOPBP1	DNA topoisomerase II binding protein 1	GO:0033314 mitotic DNA replication checkpoint signaling;GO:0000076 DNA replication checkpoint signaling;GO:0007095 mitotic G2 DNA damage checkpoint signaling		Predicted intracellular proteins	Nucleoplasm (Supported)		(M258)PID BARD1 PATHWAY; (M46)PID ATR PATHWAY; (M1)PID FANCONI PATHWAY	(M5951)HALLMARK SPERMATOGENESIS	1	1	1	0	0	1	0	1	0	0	0	0	0	0	0	0	1	0	0	0
TPGS2	25941	symbol	H. sapiens	25941	H. sapiens	TPGS2	tubulin polyglutamylase complex subunit 2	GO:0018095 protein polyglutamylation;GO:0018200 peptidyl-glutamic acid modification;GO:0018193 peptidyl-amino acid modification		Predicted intracellular proteins					0	0	0	0	0	0	0	0	0	0	0	0	0	0	0	0	0	0	0	0
TPI1	7167	symbol	H. sapiens	7167	H. sapiens	TPI1	triosephosphate isomerase 1	GO:0019242 methylglyoxal biosynthetic process;GO:0046166 glyceraldehyde-3-phosphate biosynthetic process;GO:0019682 glyceraldehyde-3-phosphate metabolic process		Disease related genes; Predicted intracellular proteins; Potential drug targets; Cancer-related genes:Candidate cancer biomarkers; ENZYME proteins:Isomerase; Enzymes	Nucleoplasm (Approved); Additional: Vesicles	Zinc; N-Hydroxy-4-Phosphono-Butanamide; 2-Phosphoglycolic Acid; Phosphoglycolohydroxamic Acid; 3-(2-Benzothiazolylthio)-1-Propanesulfonic Acid; [2(Formyl-Hydroxy-Amino)-Ethyl]-Phosphonic Acid; 5-fluorotryptophan; 2-Carboxyethylphosphonic Acid; tert-butanol; Dihydroxyacetone phosphate; 1,4-Dithiothreitol; 3-phospho-D-glyceric acid; 3-(BUTYLSULPHONYL)-PROPANOIC ACID; Artenimol; Zinc acetate; Zinc c…		(M5891)HALLMARK HYPOXIA; (M5924)HALLMARK MTORC1 SIGNALING; (M5937)HALLMARK GLYCOLYSIS	0	0	0	0	0	0	0	0	0	0	0	0	0	0	0	0	0	0	0	0
TPP1	1200	symbol	H. sapiens	1200	H. sapiens	TPP1	tripeptidyl peptidase 1	GO:1905146 lysosomal protein catabolic process;GO:0007039 protein catabolic process in the vacuole;GO:0070198 protein localization to chromosome, telomeric region		Disease related genes; Predicted intracellular proteins; Potential drug targets; ENZYME proteins:Hydrolases; Enzymes					0	0	0	0	0	0	0	0	0	0	0	0	0	0	0	1	0	0	0	0
TPRKB	51002	symbol	H. sapiens	51002	H. sapiens	TPRKB	TP53RK binding protein	GO:0002949 tRNA threonylcarbamoyladenosine modification;GO:0000722 telomere maintenance via recombination;GO:0070525 tRNA threonylcarbamoyladenosine metabolic process		Predicted intracellular proteins; Disease related genes	Cytosol (Supported)			(M5939)HALLMARK P53 PATHWAY	0	0	1	0	1	0	0	0	0	0	0	0	0	0	0	0	0	0	0	0
TPX2	22974	symbol	H. sapiens	22974	H. sapiens	TPX2	TPX2 microtubule nucleation factor	GO:0007026 negative regulation of microtubule depolymerization;GO:0031114 regulation of microtubule depolymerization;GO:0007020 microtubule nucleation		Cancer-related genes:Mutated cancer genes; Predicted intracellular proteins; Cancer-related genes:Candidate cancer biomarkers	Nucleoplasm (Supported); Additional: Cytokinetic bridge;Mitotic spindle		(M242)PID AURORA A PATHWAY; (M129)PID PLK1 PATHWAY	(M5893)HALLMARK MITOTIC SPINDLE; (M5901)HALLMARK G2M CHECKPOINT	1	1	1	1	0	0	0	0	0	0	1	0	0	1	0	0	0	0	0	0
TRAIP	10293	symbol	H. sapiens	10293	H. sapiens	TRAIP	TRAF interacting protein	GO:0106300 protein-DNA covalent cross-linking repair;GO:0032688 negative regulation of interferon-beta production;GO:0010804 negative regulation of tumor necrosis factor-mediated signaling pathway		Disease related genes; ENZYME proteins:Transferases; Predicted intracellular proteins; Potential drug targets; Enzymes	Cytosol;Plasma membrane (Supported)			(M5901)HALLMARK G2M CHECKPOINT	0	0	1	0	0	1	0	0	0	0	0	1	0	0	0	0	0	0	0	0
TRDMT1	1787	symbol	H. sapiens	1787	H. sapiens	TRDMT1	tRNA aspartic acid methyltransferase 1	GO:0036415 regulation of tRNA stability;GO:0036416 tRNA stabilization;GO:1902370 regulation of tRNA catabolic process		Predicted intracellular proteins; Enzymes; ENZYME proteins:Transferases		Pentamidine; S-adenosyl-L-homocysteine; Glycerin			0	0	0	0	1	0	0	0	0	0	0	0	0	0	0	0	0	0	0	0
TRIM9	114088	symbol	H. sapiens	114088	H. sapiens	TRIM9	tripartite motif containing 9	GO:0043161 proteasome-mediated ubiquitin-dependent protein catabolic process;GO:0010498 proteasomal protein catabolic process;GO:0006511 ubiquitin-dependent protein catabolic process		Predicted intracellular proteins; Enzymes; ENZYME proteins:Transferases					0	0	0	0	0	0	0	0	0	0	0	1	0	0	0	0	0	0	0	0
TRIP13	9319	symbol	H. sapiens	9319	H. sapiens	TRIP13	thyroid hormone receptor interactor 13	GO:0051598 meiotic recombination checkpoint signaling;GO:0033313 meiotic cell cycle checkpoint signaling;GO:0045835 negative regulation of meiotic nuclear division		Predicted intracellular proteins; Disease related genes	Nucleoplasm (Approved)			(M5925)HALLMARK E2F TARGETS	0	1	1	0	0	0	1	0	0	0	0	0	0	0	0	0	0	0	0	0
TRIP4	9325	symbol	H. sapiens	9325	H. sapiens	TRIP4	thyroid hormone receptor interactor 4	GO:1990116 ribosome-associated ubiquitin-dependent protein catabolic process;GO:0072344 rescue of stalled ribosome;GO:1901998 toxin transport		Predicted intracellular proteins; Disease related genes; Cancer-related genes:Candidate cancer biomarkers	Nuclear bodies;Nucleoplasm (Supported)				0	0	0	0	0	0	0	0	0	0	0	0	0	0	0	0	0	0	0	0
TRMT10A	93587	symbol	H. sapiens	93587	H. sapiens	TRMT10A	tRNA methyltransferase 10A	GO:0002939 tRNA N1-guanine methylation;GO:0030488 tRNA methylation;GO:0001510 RNA methylation		Disease related genes; ENZYME proteins:Transferases; Predicted intracellular proteins; Potential drug targets; Enzymes	Actin filaments;Nucleoli;Nucleoplasm (Supported); Additional: Cytosol				0	0	0	0	1	0	0	0	0	0	0	0	0	0	0	0	0	0	0	0
TROAP	10024	symbol	H. sapiens	10024	H. sapiens	TROAP	trophinin associated protein	GO:0007155 cell adhesion;GO:0022610 biological adhesion;GO:0009987 cellular process		Predicted intracellular proteins				(M5901)HALLMARK G2M CHECKPOINT	0	0	0	0	0	0	0	0	0	0	0	0	0	0	0	0	0	0	0	0
TRPA1	8989	symbol	H. sapiens	8989	H. sapiens	TRPA1	transient receptor potential cation channel subfamily A member 1	GO:0050968 detection of chemical stimulus involved in sensory perception of pain;GO:0050955 thermoception;GO:0050966 detection of mechanical stimulus involved in sensory perception of pain		FDA approved drug targets:Small molecule drugs; Disease related genes; Transporters:Transporter channels and pores; Voltage-gated ion channels:Transient Receptor Potential Channels		Levomenthol; Camphor; Cannabidiol; Butamben; (S)-camphor; Tetrahydrocannabivarin; Medical Cannabis; Nabiximols; Cannabidivarin			0	0	0	0	0	0	0	0	0	0	0	0	0	0	0	0	0	0	0	0
TSPAN6	7105	symbol	H. sapiens	7105	H. sapiens	TSPAN6	tetraspanin 6	GO:0039532 negative regulation of viral-induced cytoplasmic pattern recognition receptor signaling pathway;GO:0039531 regulation of viral-induced cytoplasmic pattern recognition receptor signaling pathway;GO:0050687 negative regulation of defense response to virus		Predicted intracellular proteins	Cell Junctions;Cytosol (Approved); Additional: Nucleoli fibrillar center				0	0	0	0	0	0	0	0	0	0	0	0	0	0	0	0	0	0	0	0
TTC14	151613	symbol	H. sapiens	151613	H. sapiens	TTC14	tetratricopeptide repeat domain 14			Predicted intracellular proteins	Nucleoplasm (Approved)				0	0	0	0	0	0	0	0	0	0	0	0	0	0	0	0	0	0	0	0
TTC21B	79809	symbol	H. sapiens	79809	H. sapiens	TTC21B	tetratricopeptide repeat domain 21B	GO:1905799 regulation of intraciliary retrograde transport;GO:1903999 negative regulation of eating behavior;GO:0021798 forebrain dorsal/ventral pattern formation		Predicted intracellular proteins; Disease related genes	Mitochondria (Supported)				0	0	0	0	0	0	0	0	0	0	0	0	0	1	0	0	0	0	0	0
TTC26	79989	symbol	H. sapiens	79989	H. sapiens	TTC26	tetratricopeptide repeat domain 26	GO:0035720 intraciliary anterograde transport;GO:1905198 manchette assembly;GO:0035735 intraciliary transport involved in cilium assembly		Predicted intracellular proteins	Cytosol;Intermediate filaments;Nuclear speckles (Approved)				0	0	0	1	0	0	0	0	0	0	0	0	0	1	0	0	0	0	0	0
TTC31	64427	symbol	H. sapiens	64427	H. sapiens	TTC31	tetratricopeptide repeat domain 31			Predicted intracellular proteins	Cytosol (Approved); Additional: Nucleoplasm				0	0	0	0	0	0	0	0	0	0	0	0	0	0	0	0	0	0	0	0
TTC32	130502	symbol	H. sapiens	130502	H. sapiens	TTC32	tetratricopeptide repeat domain 32			Predicted intracellular proteins	Mitochondria (Approved); Additional: Nucleoplasm				0	0	0	0	0	0	0	0	0	0	0	0	0	0	0	0	0	0	0	0
TTC8	123016	symbol	H. sapiens	123016	H. sapiens	TTC8	tetratricopeptide repeat domain 8	GO:0048560 establishment of anatomical structure orientation;GO:0050893 sensory processing;GO:1903251 multi-ciliated epithelial cell differentiation		Predicted intracellular proteins; Disease related genes					0	0	0	0	0	0	0	0	0	0	0	0	0	1	0	0	0	0	0	0
TTF2	8458	symbol	H. sapiens	8458	H. sapiens	TTF2	transcription termination factor 2	GO:0006369 termination of RNA polymerase II transcription;GO:0006353 DNA-templated transcription, termination;GO:0008380 RNA splicing		Predicted intracellular proteins	Cytosol (Supported)				0	0	0	0	1	0	0	0	0	0	0	0	0	0	0	0	0	0	0	0
TTK	7272	symbol	H. sapiens	7272	H. sapiens	TTK	TTK protein kinase	GO:0033316 meiotic spindle assembly checkpoint signaling;GO:1903096 protein localization to meiotic spindle midzone;GO:1905359 protein localization to meiotic spindle	Other	Predicted intracellular proteins; Enzymes; Kinases; ENZYME proteins:Transferases	Cytosol;Nucleoli (Approved)	Pyrazolanthrone; Fostamatinib; BOS172722		(M5951)HALLMARK SPERMATOGENESIS; (M5893)HALLMARK MITOTIC SPINDLE; (M5901)HALLMARK G2M CHECKPOINT	0	1	0	1	0	0	1	1	0	0	0	1	0	0	0	1	0	0	0	0
TTLL5	23093	symbol	H. sapiens	23093	H. sapiens	TTLL5	tubulin tyrosine ligase like 5	GO:0018095 protein polyglutamylation;GO:0018200 peptidyl-glutamic acid modification;GO:0060041 retina development in camera-type eye		Predicted intracellular proteins; Disease related genes	Cytosol;Plasma membrane (Supported)				0	0	0	1	0	0	0	0	0	0	0	0	0	0	0	0	0	0	0	0
TUBB	203068	symbol	H. sapiens	203068	H. sapiens	TUBB	tubulin beta class I	GO:0042267 natural killer cell mediated cytotoxicity;GO:0002228 natural killer cell mediated immunity;GO:0001909 leukocyte mediated cytotoxicity		FDA approved drug targets:Small molecule drugs; Predicted intracellular proteins; Disease related genes	Microtubules (Supported); Additional: Cytokinetic bridge;Mitotic spindle	Vinorelbine; Vincristine; Vinblastine; Podofilox; Colchicine; Epothilone D; Patupilone; CYT997; CA4P; ZEN-012; Copper; Artenimol; Vinflunine; Depatuxizumab mafodotin; Milataxel; Colchiceine		(M5925)HALLMARK E2F TARGETS	1	1	0	1	0	0	0	0	0	0	0	0	0	1	0	0	0	0	0	0
TUBD1	51174	symbol	H. sapiens	51174	H. sapiens	TUBD1	tubulin delta 1	GO:0045880 positive regulation of smoothened signaling pathway;GO:0008589 regulation of smoothened signaling pathway;GO:0007224 smoothened signaling pathway		FDA approved drug targets:Small molecule drugs; Predicted intracellular proteins	Cytosol;Nucleoplasm (Enhanced)	Vinblastine		(M5893)HALLMARK MITOTIC SPINDLE	0	0	0	1	0	0	0	0	0	0	0	0	0	0	0	0	0	0	0	0
TUBGCP3	10426	symbol	H. sapiens	10426	H. sapiens	TUBGCP3	tubulin gamma complex associated protein 3	GO:0007020 microtubule nucleation;GO:0031122 cytoplasmic microtubule organization;GO:0046785 microtubule polymerization		Predicted intracellular proteins				(M5893)HALLMARK MITOTIC SPINDLE	1	0	0	1	0	0	1	0	0	0	0	0	0	1	0	0	0	0	0	0
TUBGCP4	27229	symbol	H. sapiens	27229	H. sapiens	TUBGCP4	tubulin gamma complex associated protein 4	GO:0007020 microtubule nucleation;GO:0031122 cytoplasmic microtubule organization;GO:0046785 microtubule polymerization		Predicted intracellular proteins; Disease related genes	Centrosome (Supported)				1	0	0	1	0	0	1	0	0	0	0	0	0	1	0	0	0	0	0	0
TUBGCP5	114791	symbol	H. sapiens	114791	H. sapiens	TUBGCP5	tubulin gamma complex associated protein 5	GO:0007020 microtubule nucleation;GO:0031122 cytoplasmic microtubule organization;GO:0046785 microtubule polymerization		Predicted intracellular proteins	Centrosome;Cytosol (Supported)			(M5893)HALLMARK MITOTIC SPINDLE	1	0	0	1	0	0	1	0	0	0	0	0	0	1	0	0	0	0	0	0
TUG1	55000	symbol	H. sapiens	55000	H. sapiens	TUG1	taurine up-regulated 1	GO:0042478 regulation of eye photoreceptor cell development;GO:0046532 regulation of photoreceptor cell differentiation;GO:0042462 eye photoreceptor cell development							0	0	0	0	0	0	0	0	0	0	0	0	0	0	0	0	0	0	0	0
TULP3	7289	symbol	H. sapiens	7289	H. sapiens	TULP3	TUB like protein 3	GO:0021914 negative regulation of smoothened signaling pathway involved in ventral spinal cord patterning;GO:0060434 bronchus morphogenesis;GO:1901621 negative regulation of smoothened signaling pathway involved in dorsal/ventral neural tube patterning		Predicted intracellular proteins; Predicted secreted proteins	Nucleoli;Nucleoplasm (Supported); Additional: Plasma membrane				0	0	0	0	0	0	0	0	0	0	0	0	0	0	0	0	0	0	0	0
TXNDC12	51060	symbol	H. sapiens	51060	H. sapiens	TXNDC12	thioredoxin domain containing 12	GO:1902236 negative regulation of endoplasmic reticulum stress-induced intrinsic apoptotic signaling pathway;GO:1902235 regulation of endoplasmic reticulum stress-induced intrinsic apoptotic signaling pathway;GO:1903573 negative regulation of response to endoplasmic reticulum stress		ENZYME proteins:Oxidoreductases; Predicted intracellular proteins; Enzymes					0	0	0	0	0	0	0	0	0	0	0	0	0	0	0	0	0	0	0	0
[truncated: 132 more rows]

## Sheet: Enrichment
GroupID	Category	Term	Description	LogP	Log(q-value)	InTerm_InList	Genes	Symbols
[truncated: 314 more rows]
