# Supplementary material for: Transcriptional profiling of Hutchinson-Gilford Progeria syndrome fibroblasts reveals deficits in mesenchymal stem cell commitment to differentiation related to early events in endochondral ossification
Source: eLife journal article supplement (doi:10.7554/elife.81290), 2022-12-29
Supplement: table1-data1 [file metascape_result.xlsx]

## Sheet: Annotation
MyList	Gene ID	Type	Tax ID	Homologene Gene ID	Homologene Gene Tax ID	Gene Symbol	Description	Biological Process (GO)	Kinase Class (UniProt)	Protein Function (Protein Atlas)	Subcellular Location (Protein Atlas)	Drug (DrugBank)	Canonical Pathways	Hallmark Gene Sets	GO:1903047 mitotic cell cycle process	R-HSA-156711 Polo-like kinase mediated even	GO:0000280 nuclear division	M14 PID AURORA B PATHWAY	GO:0051656 establishment of organelle loc	GO:0010639 negative regulation of organel	WP2446 Retinoblastoma gene in cancer	GO:0051347 positive regulation of transfe	GO:0051445 regulation of meiotic cell cyc	hsa05166 HTLV-I infection	WP536 Calcium regulation in cardiac	GO:0007605 sensory perception of sound	hsa04916 Melanogenesis	GO:0035335 peptidyl-tyrosine dephosphoryl	GO:0000082 G1/S transition of mitotic cel	GO:0006281 DNA repair	GO:0030162 regulation of proteolysis
ALDH7A1	501	symbol	H. sapiens	501	H. sapiens	ALDH7A1	aldehyde dehydrogenase 7 family member A1	GO:0019285 glycine betaine biosynthetic process from choline;GO:0031455 glycine betaine metabolic process;GO:0031456 glycine betaine biosynthetic process		Predicted intracellular proteins; Enzymes; ENZYME proteins:Oxidoreductases; Disease related genes; Potential drug targets	Mitochondria (Supported); Additional: Cytosol	NADH; Artenimol		(M5937)HALLMARK GLYCOLYSIS	0	0	0	0	0	0	0	0	0	0	0	1	0	0	0	0	0
ATP2A3	489	symbol	H. sapiens	489	H. sapiens	ATP2A3	ATPase sarcoplasmic/endoplasmic reticulum Ca2+ transporting 3	GO:1903515 calcium ion transport from cytosol to endoplasmic reticulum;GO:0046967 cytosol to endoplasmic reticulum transport;GO:1900121 negative regulation of receptor binding		ENZYME proteins:Hydrolases; Enzymes					0	0	0	0	0	0	0	0	0	0	1	0	0	0	0	0	1
BORA	79866	symbol	H. sapiens	79866	H. sapiens	BORA	BORA aurora kinase A activator	GO:0060236 regulation of mitotic spindle organization;GO:0090224 regulation of spindle organization;GO:0007088 regulation of mitotic nuclear division		Predicted intracellular proteins	Nucleoli fibrillar center;Nucleoplasm (Approved); Additional: Cytosol		(M129)PID PLK1 PATHWAY		1	1	1	0	0	0	0	1	0	0	0	0	0	0	0	0	0
CAMK2A	815	symbol	H. sapiens	815	H. sapiens	CAMK2A	calcium/calmodulin dependent protein kinase II alpha	GO:1990443 peptidyl-threonine autophosphorylation;GO:2000124 regulation of endocannabinoid signaling pathway;GO:0071926 endocannabinoid signaling pathway	CAMK Ser/Thr protein kinase family	ENZYME proteins:Transferases; Kinases:CAMK Ser/Thr protein kinases; Enzymes; Predicted intracellular proteins	Plasma membrane (Approved); Additional: Cell Junctions;Cytosol	Hexatantalum Dodecabromide; 1,4-Dithiothreitol; (2Z,3E)-2,3'-biindole-2',3(1H,1'H)-dione 3-{O-[(3R)-3,4-dihydroxybutyl]oxime}; Fostamatinib	(M16518)ST WNT CA2 CYCLIC GMP PATHWAY; (M23)PID WNT NONCANONICAL PATHWAY; (M108)PID NETRIN PATHWAY		1	1	1	0	0	0	0	0	0	0	1	0	1	0	1	0	0
CCNB1	891	symbol	H. sapiens	891	H. sapiens	CCNB1	cyclin B1	GO:0046680 response to DDT;GO:2000775 histone H3-S10 phosphorylation involved in chromosome condensation;GO:0071283 cellular response to iron(III) ion		Cancer-related genes:Candidate cancer biomarkers; Predicted intracellular proteins; Transporters:Transporter channels and pores	Cytosol (Enhanced)		(M176)PID FOXM1 PATHWAY; (M129)PID PLK1 PATHWAY; (M136)PID FOXO PATHWAY		1	1	1	0	1	1	1	1	0	0	0	0	0	0	0	0	0
CDC20	991	symbol	H. sapiens	991	H. sapiens	CDC20	cell division cycle 20	GO:1905786 positive regulation of anaphase-promoting complex-dependent catabolic process;GO:1905784 regulation of anaphase-promoting complex-dependent catabolic process;GO:0090129 positive regulation of synapse maturation		Cancer-related genes:Candidate cancer biomarkers; Predicted intracellular proteins	Cytosol;Nucleoplasm (Enhanced)		(M129)PID PLK1 PATHWAY	(M5901)HALLMARK G2M CHECKPOINT; (M5907)HALLMARK ESTROGEN RESPONSE LATE; (M5925)HALLMARK E2F TARGETS	1	1	1	0	0	0	1	1	1	1	0	0	0	0	0	0	1
CDC25C	995	symbol	H. sapiens	995	H. sapiens	CDC25C	cell division cycle 25C	GO:0110032 positive regulation of G2/MI transition of meiotic cell cycle;GO:0110030 regulation of G2/MI transition of meiotic cell cycle;GO:0008315 G2/MI transition of meiotic cell cycle		Cancer-related genes:Candidate cancer biomarkers; Predicted intracellular proteins; ENZYME proteins:Hydrolases; Enzymes	Nuclear speckles (Enhanced)		(M84)PID ATM PATHWAY; (M46)PID ATR PATHWAY; (M129)PID PLK1 PATHWAY		1	1	1	0	0	0	0	0	1	0	0	0	0	1	0	0	0
CDCA3	83461	symbol	H. sapiens	83461	H. sapiens	CDCA3	cell division cycle associated 3	GO:0051301 cell division;GO:0016567 protein ubiquitination;GO:0032446 protein modification by small protein conjugation		Predicted intracellular proteins	Cytosol (Approved)			(M5925)HALLMARK E2F TARGETS	1	0	0	0	0	0	0	0	0	0	0	0	0	0	0	0	0
CDCA8	55143	symbol	H. sapiens	55143	H. sapiens	CDCA8	cell division cycle associated 8	GO:0007080 mitotic metaphase plate congression;GO:0051310 metaphase plate congression;GO:0051303 establishment of chromosome localization		Predicted intracellular proteins	Nucleoli (Supported); Additional: Cytokinetic bridge;Nucleoplasm		(M14)PID AURORA B PATHWAY	(M5925)HALLMARK E2F TARGETS	1	0	1	1	1	0	0	0	0	0	0	0	0	0	0	0	0
CDKN2D	1032	symbol	H. sapiens	1032	H. sapiens	CDKN2D	cyclin dependent kinase inhibitor 2D	GO:0048102 autophagic cell death;GO:1902230 negative regulation of intrinsic apoptotic signaling pathway in response to DNA damage;GO:0045736 negative regulation of cyclin-dependent protein serine/threonine kinase activity		Predicted intracellular proteins	Nucleoplasm (Supported); Additional: Cytosol			(M5938)HALLMARK REACTIVE OXYGEN SPECIES PATHWAY	1	1	1	0	0	0	1	0	0	0	1	1	0	0	1	1	1
CDKN3	1033	symbol	H. sapiens	1033	H. sapiens	CDKN3	cyclin dependent kinase inhibitor 3	GO:0000079 regulation of cyclin-dependent protein serine/threonine kinase activity;GO:1904029 regulation of cyclin-dependent protein kinase activity;GO:0035335 peptidyl-tyrosine dephosphorylation		Predicted intracellular proteins; ENZYME proteins:Hydrolases; Enzymes; Disease related genes; Potential drug targets	Cytosol (Enhanced)			(M5951)HALLMARK SPERMATOGENESIS; (M5901)HALLMARK G2M CHECKPOINT; (M5925)HALLMARK E2F TARGETS	1	1	0	0	0	0	0	0	0	0	0	0	0	1	1	0	0
CENPA	1058	symbol	H. sapiens	1058	H. sapiens	CENPA	centromere protein A	GO:0051382 kinetochore assembly;GO:0051383 kinetochore organization;GO:0071459 protein localization to chromosome, centromeric region		Predicted intracellular proteins	Nucleoplasm (Supported)		(M242)PID AURORA A PATHWAY; (M14)PID AURORA B PATHWAY; (M176)PID FOXM1 PATHWAY	(M5901)HALLMARK G2M CHECKPOINT; (M5937)HALLMARK GLYCOLYSIS	1	1	1	1	1	0	0	0	0	0	0	0	0	0	0	0	0
CHD1L	9557	symbol	H. sapiens	9557	H. sapiens	CHD1L	chromodomain helicase DNA binding protein 1 like	GO:0032508 DNA duplex unwinding;GO:0032392 DNA geometric change;GO:0006338 chromatin remodeling		Predicted intracellular proteins; ENZYME proteins:Hydrolases; Enzymes	Nucleoplasm (Supported)				0	0	0	0	0	0	0	0	0	0	0	0	0	0	0	1	0
CHRNA9	55584	symbol	H. sapiens	55584	H. sapiens	CHRNA9	cholinergic receptor nicotinic alpha 9 subunit	GO:0050910 detection of mechanical stimulus involved in sensory perception of sound;GO:0050974 detection of mechanical stimulus involved in sensory perception;GO:0050982 detection of mechanical stimulus				Nicotine; Ethanol; ATG003; Lobeline; RPI-78M; Tetraethylammonium			0	0	0	0	0	0	0	0	0	0	0	1	0	0	0	0	0
CIB2	10518	symbol	H. sapiens	10518	H. sapiens	CIB2	calcium and integrin binding family member 2	GO:0071318 cellular response to ATP;GO:0033198 response to ATP;GO:0045494 photoreceptor cell maintenance		Cancer-related genes:Candidate cancer biomarkers; Predicted intracellular proteins; Disease related genes		Calcium citrate; Calcium Phosphate; Calcium phosphate dihydrate			0	0	0	0	0	0	0	0	0	0	0	0	0	0	0	0	0
COL27A1	85301	symbol	H. sapiens	85301	H. sapiens	COL27A1	collagen type XXVII alpha 1 chain	GO:0003431 growth plate cartilage chondrocyte development;GO:0003433 chondrocyte development involved in endochondral bone morphogenesis;GO:0003418 growth plate cartilage chondrocyte differentiation		Predicted intracellular proteins; Predicted secreted proteins; Disease related genes			(M3005)NABA COLLAGENS; (M5884)NABA CORE MATRISOME; (M5889)NABA MATRISOME		0	0	0	0	0	0	0	0	0	0	0	0	0	0	0	0	0
DBF4B	80174	symbol	H. sapiens	80174	H. sapiens	DBF4B	DBF4 zinc finger B	GO:0010571 positive regulation of nuclear cell cycle DNA replication;GO:2000105 positive regulation of DNA-dependent DNA replication;GO:0033262 regulation of nuclear cell cycle DNA replication		Predicted intracellular proteins	Nucleoplasm (Supported); Additional: Vesicles				1	1	0	0	0	0	0	1	0	0	0	0	0	0	0	0	0
DDX46	9879	symbol	H. sapiens	9879	H. sapiens	DDX46	DEAD-box helicase 46	GO:0000377 RNA splicing, via transesterification reactions with bulged adenosine as nucleophile;GO:0000398 mRNA splicing, via spliceosome;GO:0000375 RNA splicing, via transesterification reactions		Predicted intracellular proteins; ENZYME proteins:Hydrolases; Enzymes	Nuclear speckles (Supported); Additional: Nucleoli fibrillar center				0	0	0	0	0	0	0	0	0	0	0	0	0	0	0	0	0
DMC1	11144	symbol	H. sapiens	11144	H. sapiens	DMC1	DNA meiotic recombinase 1	GO:0000730 DNA recombinase assembly;GO:0090735 DNA repair complex assembly;GO:0042148 strand invasion		Predicted intracellular proteins	Nucleoplasm (Approved)	Imidazole		(M5951)HALLMARK SPERMATOGENESIS	1	0	1	0	0	0	1	0	0	0	0	0	0	0	0	1	0
DNAJB5	25822	symbol	H. sapiens	25822	H. sapiens	DNAJB5	DnaJ heat shock protein family (Hsp40) member B5	GO:0051085 chaperone cofactor-dependent protein refolding;GO:0051084 'de novo' posttranslational protein folding;GO:0006458 'de novo' protein folding		Predicted intracellular proteins	Nucleoplasm (Approved); Additional: Cytosol				0	0	0	0	0	0	0	0	0	0	0	0	0	0	0	0	0
DUSP12	11266	symbol	H. sapiens	11266	H. sapiens	DUSP12	dual specificity phosphatase 12	GO:0033133 positive regulation of glucokinase activity;GO:1903301 positive regulation of hexokinase activity;GO:0033131 regulation of glucokinase activity		Predicted intracellular proteins; ENZYME proteins:Hydrolases; Enzymes	Nucleoplasm (Supported)				0	1	0	0	0	0	0	1	0	0	0	0	0	1	0	0	0
E2F8	79733	symbol	H. sapiens	79733	H. sapiens	E2F8	E2F transcription factor 8	GO:0033301 cell cycle comprising mitosis without cytokinesis;GO:0032877 positive regulation of DNA endoreduplication;GO:0032875 regulation of DNA endoreduplication		Predicted intracellular proteins; Transcription factors:Helix-turn-helix domains	Nucleoli (Supported); Additional: Cytosol;Nucleoplasm			(M5925)HALLMARK E2F TARGETS	1	1	1	1	0	0	0	0	0	0	0	0	0	0	0	0	0
ELK3	2004	symbol	H. sapiens	2004	H. sapiens	ELK3	ETS transcription factor ELK3	GO:0042060 wound healing;GO:0009611 response to wounding;GO:0001525 angiogenesis		Cancer-related genes:Candidate cancer biomarkers; Predicted intracellular proteins; Transcription factors:Helix-turn-helix domains	Nucleoplasm (Supported); Additional: Mitochondria				0	0	0	0	0	0	0	0	0	0	0	0	0	0	0	0	0
ERLIN1	10613	symbol	H. sapiens	10613	H. sapiens	ERLIN1	ER lipid raft associated 1	GO:0045541 negative regulation of cholesterol biosynthetic process;GO:0090206 negative regulation of cholesterol metabolic process;GO:0106119 negative regulation of sterol biosynthetic process		Transporters:Transporter channels and pores; Predicted intracellular proteins; Potential drug targets; Disease related genes	Endoplasmic reticulum (Supported)				0	0	0	0	0	0	0	0	0	0	0	0	0	0	0	0	0
FAM64A	54478	gene_synonym	H. sapiens	54478	H. sapiens	PIMREG	PICALM interacting mitotic regulator	GO:0051301 cell division;GO:0007049 cell cycle;GO:0009987 cellular process		Predicted intracellular proteins	Nucleoplasm (Enhanced)				1	0	0	0	0	0	0	0	0	0	0	0	0	0	0	0	0
FKBP1AP1	2282	symbol	H. sapiens	2282	H. sapiens	FKBP1AP1	FKBP prolyl isomerase 1A pseudogene 1								0	0	0	0	0	0	0	0	0	0	0	0	0	0	0	0	0
FN3KRP	79672	symbol	H. sapiens	79672	H. sapiens	FN3KRP	fructosamine 3 kinase related protein	GO:0043687 post-translational protein modification;GO:0016310 phosphorylation;GO:0006796 phosphate-containing compound metabolic process		Predicted intracellular proteins	Nucleoplasm (Approved)				0	0	0	0	0	0	0	0	0	0	0	0	0	0	0	0	0
FOXM1	2305	symbol	H. sapiens	2305	H. sapiens	FOXM1	forkhead box M1	GO:0006978 DNA damage response, signal transduction by p53 class mediator resulting in transcription of p21 class mediator;GO:0042772 DNA damage response, signal transduction resulting in transcription;GO:0090344 negative regulation of cell aging		Cancer-related genes:Candidate cancer biomarkers; Predicted intracellular proteins; Transcription factors:Helix-turn-helix domains	Nucleoli;Nucleoli rim;Nucleoplasm (Supported); Additional: Cytosol		(M176)PID FOXM1 PATHWAY		1	1	0	0	0	0	0	0	0	0	0	0	0	0	0	1	0
GFAP	2670	symbol	H. sapiens	2670	H. sapiens	GFAP	glial fibrillary acidic protein	GO:0010625 positive regulation of Schwann cell proliferation;GO:0070777 D-aspartate transport;GO:0070779 D-aspartate import across plasma membrane		Candidate cardiovascular disease genes; Disease related genes; Predicted intracellular proteins	Intermediate filaments (Supported)				0	0	0	0	0	1	0	0	0	0	0	0	0	0	0	0	0
GJA5	2702	symbol	H. sapiens	2702	H. sapiens	GJA5	gap junction protein alpha 5	GO:0086044 atrial cardiac muscle cell to AV node cell communication by electrical coupling;GO:0086055 Purkinje myocyte to ventricular cardiac muscle cell communication by electrical coupling;GO:0098906 regulation of Purkinje myocyte action potential		Disease related genes				(M5909)HALLMARK MYOGENESIS	0	0	0	0	0	1	0	0	0	0	1	0	0	0	0	0	0
GOLM1	51280	symbol	H. sapiens	51280	H. sapiens	GOLM1	golgi membrane protein 1	GO:0006997 nucleus organization;GO:0019216 regulation of lipid metabolic process;GO:0006629 lipid metabolic process		Predicted intracellular proteins	Golgi apparatus (Enhanced)				0	0	0	0	0	0	0	0	0	0	0	0	0	0	0	0	0
GRPR	2925	symbol	H. sapiens	2925	H. sapiens	GRPR	gastrin releasing peptide receptor	GO:0061744 motor behavior;GO:0035176 social behavior;GO:0051703 biological process involved in intraspecies interaction between organisms		G-protein coupled receptors:GPCRs excl olfactory receptors	Plasma membrane (Supported)				0	0	0	0	0	0	0	0	0	0	0	0	0	0	0	0	0
GTSE1	51512	symbol	H. sapiens	51512	H. sapiens	GTSE1	G2 and S-phase expressed 1	GO:0006977 DNA damage response, signal transduction by p53 class mediator resulting in cell cycle arrest;GO:0031571 mitotic G1 DNA damage checkpoint signaling;GO:0044819 mitotic G1/S transition checkpoint signaling		Predicted intracellular proteins	Centrosome (Approved); Additional: Plasma membrane				1	1	1	0	0	0	0	0	0	0	0	0	0	0	1	0	0
HLA-DPB1	3115	symbol	H. sapiens	3115	H. sapiens	HLA-DPB1	major histocompatibility complex, class II, DP beta 1	GO:0002399 MHC class II protein complex assembly;GO:0002503 peptide antigen assembly with MHC class II protein complex;GO:0002501 peptide antigen assembly with MHC protein complex			Cell Junctions (Approved); Additional: Nucleoplasm				0	0	0	0	0	0	0	0	0	1	1	0	0	0	0	0	0
HOXC6	3223	symbol	H. sapiens	3223	H. sapiens	HOXC6	homeobox C6	GO:0009952 anterior/posterior pattern specification;GO:0003002 regionalization;GO:0007389 pattern specification process		Predicted intracellular proteins; Transcription factors:Helix-turn-helix domains	Nucleoplasm (Supported); Additional: Cytosol				0	0	0	0	0	0	0	0	0	0	0	0	0	0	0	0	0
KCNS1	3787	symbol	H. sapiens	3787	H. sapiens	KCNS1	potassium voltage-gated channel modifier subfamily S member 1	GO:1902259 regulation of delayed rectifier potassium channel activity;GO:1901016 regulation of potassium ion transmembrane transporter activity;GO:1901379 regulation of potassium ion transmembrane transport		Transporters:Transporter channels and pores; Voltage-gated ion channels:Voltage-Gated Potassium Channels					0	0	0	0	0	0	0	0	0	0	0	0	0	0	0	0	0
KIF20A	10112	symbol	H. sapiens	10112	H. sapiens	KIF20A	kinesin family member 20A	GO:0061952 midbody abscission;GO:1902410 mitotic cytokinetic process;GO:0032506 cytokinetic process		Predicted intracellular proteins	Cleavage furrow;Nucleoplasm (Enhanced); Additional: Cytokinetic bridge		(M14)PID AURORA B PATHWAY; (M129)PID PLK1 PATHWAY	(M5907)HALLMARK ESTROGEN RESPONSE LATE; (M5937)HALLMARK GLYCOLYSIS	1	1	1	1	0	0	0	0	0	0	0	0	0	0	0	0	0
LINC01468	101928687	gene_synonym	H. sapiens	101928687	H. sapiens	LNCAROD	lncRNA activating regulator of DKK1								0	0	0	0	0	0	0	0	0	0	0	0	0	0	0	0	0
MC1R	4157	symbol	H. sapiens	4157	H. sapiens	MC1R	melanocortin 1 receptor	GO:0090037 positive regulation of protein kinase C signaling;GO:0010739 positive regulation of protein kinase A signaling;GO:0009650 UV protection		Potential drug targets; G-protein coupled receptors:GPCRs excl olfactory receptors; Disease related genes		Afamelanotide; CZEN 002; Bremelanotide			0	0	0	0	0	0	0	0	0	0	0	0	1	0	0	1	0
MIR503HG	84848	symbol	H. sapiens	84848	H. sapiens	MIR503HG	MIR503 host gene								0	0	0	0	0	0	0	0	0	0	0	0	0	0	0	0	0
MLPH	79083	symbol	H. sapiens	79083	H. sapiens	MLPH	melanophilin	GO:0032402 melanosome transport;GO:0032401 establishment of melanosome localization;GO:0051904 pigment granule transport		Predicted intracellular proteins; Disease related genes				(M5906)HALLMARK ESTROGEN RESPONSE EARLY	0	0	0	0	1	0	0	0	0	0	0	0	0	0	0	0	0
MRPL48	51642	symbol	H. sapiens	51642	H. sapiens	MRPL48	mitochondrial ribosomal protein L48			Predicted intracellular proteins; Ribosomal proteins	Mitochondria (Supported)				0	0	0	0	0	0	0	0	0	0	0	0	0	0	0	0	0
MYBL2	4605	symbol	H. sapiens	4605	H. sapiens	MYBL2	MYB proto-oncogene like 2	GO:0043525 positive regulation of neuron apoptotic process;GO:0090307 mitotic spindle assembly;GO:1990830 cellular response to leukemia inhibitory factor		Cancer-related genes:Candidate cancer biomarkers; Predicted intracellular proteins; Transcription factors:Helix-turn-helix domains	Nucleoplasm (Supported); Additional: Cytosol		(M40)PID E2F PATHWAY	(M5901)HALLMARK G2M CHECKPOINT; (M5925)HALLMARK E2F TARGETS	1	1	1	0	0	0	1	0	0	1	1	0	0	0	0	0	0
NEFH	4744	symbol	H. sapiens	4744	H. sapiens	NEFH	neurofilament heavy chain	GO:0048936 peripheral nervous system neuron axonogenesis;GO:0033693 neurofilament bundle assembly;GO:0099185 postsynaptic intermediate filament cytoskeleton organization		Predicted intracellular proteins; Disease related genes				(M5951)HALLMARK SPERMATOGENESIS; (M5902)HALLMARK APOPTOSIS	1	0	0	0	1	1	0	0	0	0	0	0	0	0	0	0	0
NPTX2	4885	symbol	H. sapiens	4885	H. sapiens	NPTX2	neuronal pentraxin 2	GO:0098962 regulation of postsynaptic neurotransmitter receptor activity;GO:0099601 regulation of neurotransmitter receptor activity;GO:0008306 associative learning		Predicted secreted proteins	Actin filaments;Golgi apparatus (Approved); Additional: Centrosome			(M5941)HALLMARK UV RESPONSE UP	0	0	0	0	0	0	0	0	0	0	0	0	0	0	0	0	0
NRM	11270	symbol	H. sapiens	11270	H. sapiens	NRM	nurim	GO:0008150 biological_process			Nuclear membrane (Enhanced)				0	0	0	0	0	0	0	0	0	0	0	0	0	0	0	0	0
PALM3	342979	symbol	H. sapiens	342979	H. sapiens	PALM3	paralemmin 3	GO:0008063 Toll signaling pathway;GO:0001960 negative regulation of cytokine-mediated signaling pathway;GO:0060761 negative regulation of response to cytokine stimulus		Predicted intracellular proteins	Nuclear bodies;Nucleoplasm (Approved); Additional: Plasma membrane				0	0	0	0	0	0	0	0	0	0	0	0	0	0	0	0	0
PAQR5	54852	symbol	H. sapiens	54852	H. sapiens	PAQR5	progestin and adipoQ receptor family member 5	GO:0048477 oogenesis;GO:0007292 female gamete generation;GO:0007281 germ cell development			Vesicles (Approved)				0	0	1	0	0	0	0	0	0	0	0	0	0	0	0	0	0
PAX3	5077	symbol	H. sapiens	5077	H. sapiens	PAX3	paired box 3	GO:0007605 sensory perception of sound;GO:0050954 sensory perception of mechanical stimulus;GO:0007517 muscle organ development		Predicted intracellular proteins; Disease related genes; Cancer-related genes; Transcription factors:Helix-turn-helix domains	Nucleoplasm (Enhanced)		(M279)PID RB 1PATHWAY	(M5956)HALLMARK KRAS SIGNALING DN	0	0	0	0	0	0	0	0	0	0	0	1	0	0	0	0	0
PIK3CD-AS2	101929074	symbol	H. sapiens	101929074	H. sapiens	PIK3CD-AS2	PIK3CD antisense RNA 2								0	0	0	0	0	0	0	0	0	0	0	0	0	0	0	0	0
PIWIL2	55124	symbol	H. sapiens	55124	H. sapiens	PIWIL2	piwi like RNA-mediated gene silencing 2	GO:0060903 positive regulation of meiosis I;GO:0030718 germ-line stem cell population maintenance;GO:0071442 positive regulation of histone H3-K14 acetylation		Predicted intracellular proteins					1	1	1	0	0	0	0	0	1	0	0	0	0	0	0	0	0
PLK1	5347	symbol	H. sapiens	5347	H. sapiens	PLK1	polo like kinase 1	GO:0070194 synaptonemal complex disassembly;GO:1905784 regulation of anaphase-promoting complex-dependent catabolic process;GO:0016321 female meiosis chromosome segregation	Other	Cancer-related genes:Candidate cancer biomarkers; ENZYME proteins:Transferases; Kinases; Predicted intracellular proteins; Enzymes; Disease related genes; Potential drug targets		3-[3-chloro-5-(5-{[(1S)-1-phenylethyl]amino}isoxazolo[5,4-c]pyridin-3-yl)phenyl]propan-1-ol; 3-[3-(3-methyl-6-{[(1S)-1-phenylethyl]amino}-1H-pyrazolo[4,3-c]pyridin-1-yl)phenyl]propanamide; 4-(4-METHYLPIPERAZIN-1-YL)-N-[5-(2-THIENYLACETYL)-1,5-DIHYDROPYRROLO[3,4-C]PYRAZOL-3-YL]BENZAMIDE; 1-[5-Methyl-2-(trifluoromethyl)furan-3-yl]-3-[5-[2-[[6-(1H-1,2,4-triazol-5-ylamino)pyrimidin-4-yl]amino]ethyl]-…	(M46)PID ATR PATHWAY; (M176)PID FOXM1 PATHWAY; (M129)PID PLK1 PATHWAY	(M5928)HALLMARK MYC TARGETS V2; (M5893)HALLMARK MITOTIC SPINDLE; (M5901)HALLMARK G2M CHECKPOINT	1	1	1	1	1	1	0	1	0	1	1	0	0	0	0	0	1
PRKCD	5580	symbol	H. sapiens	5580	H. sapiens	PRKCD	protein kinase C delta	GO:1900161 regulation of phospholipid scramblase activity;GO:1900163 positive regulation of phospholipid scramblase activity;GO:2000752 regulation of glucosylceramide catabolic process	AGC Ser/Thr protein kinase family	ENZYME proteins:Transferases; Kinases:AGC Ser/Thr protein kinases; Predicted intracellular proteins; Enzymes; Disease related genes; Cancer-related genes:Mutational cancer driver genes; Potential drug targets	Cytosol (Enhanced); Additional: Endoplasmic reticulum;Golgi apparatus	13-Acetylphorbol; Ingenol mebutate; Fostamatinib	(M125)PID IGF1 PATHWAY; (M165)PID SYNDECAN 4 PATHWAY; (M275)PID ALPHA SYNUCLEIN PATHWAY	(M5941)HALLMARK UV RESPONSE UP; (M5921)HALLMARK COMPLEMENT	1	1	1	0	0	1	0	1	0	0	1	0	0	1	0	1	0
PSRC1	84722	symbol	H. sapiens	84722	H. sapiens	PSRC1	proline and serine rich coiled-coil 1	GO:0045737 positive regulation of cyclin-dependent protein serine/threonine kinase activity;GO:0031116 positive regulation of microtubule polymerization;GO:1904031 positive regulation of cyclin-dependent protein kinase activity		Predicted intracellular proteins	Cytosol (Approved); Additional: Nucleoplasm				1	1	1	1	1	1	0	1	0	0	0	0	0	0	0	0	0
PTTG1	9232	symbol	H. sapiens	9232	H. sapiens	PTTG1	PTTG1 regulator of sister chromatid separation, securin	GO:0033046 negative regulation of sister chromatid segregation;GO:0033048 negative regulation of mitotic sister chromatid segregation;GO:2000816 negative regulation of mitotic sister chromatid separation		Cancer-related genes:Candidate cancer biomarkers; Predicted intracellular proteins	Cytosol (Supported); Additional: Nucleoli			(M5901)HALLMARK G2M CHECKPOINT; (M5925)HALLMARK E2F TARGETS	1	0	1	0	0	1	0	0	0	1	0	0	0	0	0	1	1
QPRT	23475	symbol	H. sapiens	23475	H. sapiens	QPRT	quinolinate phosphoribosyltransferase	GO:0034213 quinolinate catabolic process;GO:0046874 quinolinate metabolic process;GO:0072526 pyridine-containing compound catabolic process		ENZYME proteins:Transferases; Predicted intracellular proteins; FDA approved drug targets:Small molecule drugs; Enzymes	Vesicles (Approved)	Niacin			0	0	0	0	0	0	0	0	0	0	0	0	0	0	0	0	0
RAE1	8480	symbol	H. sapiens	8480	H. sapiens	RAE1	ribonucleic acid export 1	GO:0000972 transcription-dependent tethering of RNA polymerase II gene DNA at nuclear periphery;GO:0060236 regulation of mitotic spindle organization;GO:0090224 regulation of spindle organization		Transporters:Transporter channels and pores; Predicted intracellular proteins	Nucleoli fibrillar center;Nucleoplasm (Supported)			(M5898)HALLMARK DNA REPAIR	1	0	1	0	0	0	0	0	0	0	1	0	0	0	0	0	0
RBM17	84991	symbol	H. sapiens	84991	H. sapiens	RBM17	RNA binding motif protein 17	GO:0045292 mRNA cis splicing, via spliceosome;GO:0000380 alternative mRNA splicing, via spliceosome;GO:0000377 RNA splicing, via transesterification reactions with bulged adenosine as nucleophile		Predicted intracellular proteins	Nucleoplasm (Supported)				0	0	0	0	0	0	0	0	0	0	0	0	0	0	0	0	0
RBP1	5947	symbol	H. sapiens	5947	H. sapiens	RBP1	retinol binding protein 1	GO:0002138 retinoic acid biosynthetic process;GO:0006776 vitamin A metabolic process;GO:0016102 diterpenoid biosynthetic process		Predicted intracellular proteins	Cytosol (Approved); Additional: Nucleoplasm	Acitretin	(M207)PID RETINOIC ACID PATHWAY	(M5948)HALLMARK BILE ACID METABOLISM	0	0	0	0	0	0	1	0	0	0	0	0	0	0	0	0	0
S100A3	6274	symbol	H. sapiens	6274	H. sapiens	S100A3	S100 calcium binding protein A3			Predicted intracellular proteins	Cytosol (Enhanced); Additional: Golgi apparatus;Plasma membrane		(M5883)NABA SECRETED FACTORS; (M5885)NABA MATRISOME ASSOCIATED; (M5889)NABA MATRISOME		0	0	0	0	0	0	0	0	0	0	0	0	0	0	0	0	0
SERPING1	710	symbol	H. sapiens	710	H. sapiens	SERPING1	serpin family G member 1	GO:0001868 regulation of complement activation, lectin pathway;GO:0001869 negative regulation of complement activation, lectin pathway;GO:0001867 complement activation, lectin pathway		Candidate cardiovascular disease genes; Predicted secreted proteins; Disease related genes; Predicted intracellular proteins		PPL-100; Copper	(M3468)NABA ECM REGULATORS; (M5885)NABA MATRISOME ASSOCIATED; (M5889)NABA MATRISOME	(M5946)HALLMARK COAGULATION; (M5913)HALLMARK INTERFERON GAMMA RESPONSE; (M5921)HALLMARK COMPLEMENT	0	0	0	0	0	0	0	0	0	0	0	0	0	0	0	0	1
SLCO4A1	28231	symbol	H. sapiens	28231	H. sapiens	SLCO4A1	solute carrier organic anion transporter family member 4A1	GO:0070327 thyroid hormone transport;GO:0043252 sodium-independent organic anion transport;GO:0009914 hormone transport		Transporters:Electrochemical Potential-driven transporters	Cell Junctions (Supported)				0	0	0	0	0	0	0	0	0	0	0	0	0	0	0	0	0
SNHG1	23642	symbol	H. sapiens	23642	H. sapiens	SNHG1	small nucleolar RNA host gene 1	GO:0006396 RNA processing;GO:0016070 RNA metabolic process;GO:0090304 nucleic acid metabolic process							0	0	0	0	0	0	0	0	0	0	0	0	0	0	0	0	0
SOAT2	8435	symbol	H. sapiens	8435	H. sapiens	SOAT2	sterol O-acyltransferase 2	GO:0034379 very-low-density lipoprotein particle assembly;GO:0034433 steroid esterification;GO:0034434 sterol esterification		ENZYME proteins:Transferases; Enzymes		Hesperetin		(M5948)HALLMARK BILE ACID METABOLISM	0	0	0	0	0	0	0	0	0	0	0	0	0	0	0	0	0
SOX7	83595	symbol	H. sapiens	83595	H. sapiens	SOX7	SRY-box transcription factor 7	GO:0001706 endoderm formation;GO:0007492 endoderm development;GO:0001704 formation of primary germ layer		Predicted intracellular proteins; Transcription factors:Other all-alpha-helical DNA-binding domains	Nuclear speckles (Approved); Additional: Golgi apparatus				0	0	0	0	0	0	0	0	0	0	0	0	0	0	0	0	1
SSR2	6746	symbol	H. sapiens	6746	H. sapiens	SSR2	signal sequence receptor subunit 2	GO:0006613 cotranslational protein targeting to membrane;GO:0006612 protein targeting to membrane;GO:0090150 establishment of protein localization to membrane		Predicted intracellular proteins					0	0	0	0	0	0	0	0	0	0	0	0	0	0	0	0	0
STMN1	3925	symbol	H. sapiens	3925	H. sapiens	STMN1	stathmin 1	GO:0070494 regulation of thrombin-activated receptor signaling pathway;GO:0070495 negative regulation of thrombin-activated receptor signaling pathway;GO:1905098 negative regulation of guanyl-nucleotide exchange factor activity		Cancer-related genes:Candidate cancer biomarkers; Predicted intracellular proteins	Cytosol (Approved)		(M209)PID P38 GAMMA DELTA PATHWAY; (M14)PID AURORA B PATHWAY	(M5901)HALLMARK G2M CHECKPOINT; (M5925)HALLMARK E2F TARGETS; (M5937)HALLMARK GLYCOLYSIS	1	0	0	1	0	1	1	0	0	0	1	0	0	0	0	0	0
STXBP2	6813	symbol	H. sapiens	6813	H. sapiens	STXBP2	syntaxin binding protein 2	GO:0043312 neutrophil degranulation;GO:0002283 neutrophil activation involved in immune response;GO:0043304 regulation of mast cell degranulation		Predicted intracellular proteins; Disease related genes	Cytosol (Enhanced)				0	0	0	0	1	0	0	0	0	0	0	0	0	0	0	0	0
STXBP6	29091	symbol	H. sapiens	29091	H. sapiens	STXBP6	syntaxin binding protein 6	GO:0035542 regulation of SNARE complex assembly;GO:0035493 SNARE complex assembly;GO:0045920 negative regulation of exocytosis		Predicted intracellular proteins					0	0	0	0	0	1	0	0	0	0	0	0	0	0	0	0	0
TACC3	10460	symbol	H. sapiens	10460	H. sapiens	TACC3	transforming acidic coiled-coil containing protein 3	GO:0060236 regulation of mitotic spindle organization;GO:0090224 regulation of spindle organization;GO:0007091 metaphase/anaphase transition of mitotic cell cycle		Predicted intracellular proteins	Centriolar satellite;Cytosol;Mitotic spindle (Enhanced); Additional: Vesicles		(M242)PID AURORA A PATHWAY; (M71)PID ILK PATHWAY	(M5901)HALLMARK G2M CHECKPOINT; (M5925)HALLMARK E2F TARGETS	1	1	1	0	0	0	0	0	0	0	0	0	0	0	0	0	0
TACSTD2	4070	symbol	H. sapiens	4070	H. sapiens	TACSTD2	tumor associated calcium signal transducer 2	GO:0090191 negative regulation of branching involved in ureteric bud morphogenesis;GO:1900028 negative regulation of ruffle assembly;GO:1905331 negative regulation of morphogenesis of an epithelium		Disease related genes	Plasma membrane (Supported); Additional: Nucleoli;Vesicles	Sacituzumab govitecan			1	0	0	0	0	1	0	0	0	0	0	0	0	0	0	0	0
TEX261	113419	symbol	H. sapiens	113419	H. sapiens	TEX261	testis expressed 261	GO:0006888 endoplasmic reticulum to Golgi vesicle-mediated transport;GO:0048193 Golgi vesicle transport;GO:0043065 positive regulation of apoptotic process			Cytosol;Nucleoplasm (Approved)				0	0	0	0	0	0	0	0	0	0	0	0	0	0	0	0	0
TMEM106C	79022	symbol	H. sapiens	79022	H. sapiens	TMEM106C	transmembrane protein 106C	GO:0008150 biological_process		Predicted intracellular proteins					0	0	0	0	0	0	0	0	0	0	0	0	0	0	0	0	0
TMSB15B	286527	symbol	H. sapiens	286527	H. sapiens	TMSB15B	thymosin beta 15B	GO:0042989 sequestering of actin monomers;GO:0030837 negative regulation of actin filament polymerization;GO:0032507 maintenance of protein location in cell		Predicted intracellular proteins					1	0	0	0	0	1	0	0	0	0	0	0	0	0	0	0	0
TOE1	114034	symbol	H. sapiens	114034	H. sapiens	TOE1	target of EGR1, exonuclease	GO:0034472 snRNA 3'-end processing;GO:0016180 snRNA processing;GO:0090503 RNA phosphodiester bond hydrolysis, exonucleolytic		Predicted intracellular proteins; Disease related genes	Nuclear bodies (Enhanced); Additional: Nucleoplasm				0	0	0	0	0	0	0	0	0	0	0	0	0	0	0	0	0
TOX2	84969	symbol	H. sapiens	84969	H. sapiens	TOX2	TOX high mobility group box family member 2	GO:0045944 positive regulation of transcription by RNA polymerase II;GO:0045893 positive regulation of transcription, DNA-templated;GO:1903508 positive regulation of nucleic acid-templated transcription		Predicted intracellular proteins; Transcription factors:Other all-alpha-helical DNA-binding domains	Nucleoplasm (Supported)				0	0	0	0	0	0	0	0	0	0	0	0	0	0	0	0	0
TPGS2	25941	symbol	H. sapiens	25941	H. sapiens	TPGS2	tubulin polyglutamylase complex subunit 2	GO:0018095 protein polyglutamylation;GO:0018200 peptidyl-glutamic acid modification;GO:0018193 peptidyl-amino acid modification		Predicted intracellular proteins					0	0	0	0	0	0	0	0	0	0	0	0	0	0	0	0	0
TROAP	10024	symbol	H. sapiens	10024	H. sapiens	TROAP	trophinin associated protein	GO:0007155 cell adhesion;GO:0022610 biological adhesion;GO:0009987 cellular process		Predicted intracellular proteins				(M5901)HALLMARK G2M CHECKPOINT	0	0	0	0	0	0	0	0	0	0	0	0	0	0	0	0	0
TYMS	7298	symbol	H. sapiens	7298	H. sapiens	TYMS	thymidylate synthetase	GO:0006231 dTMP biosynthetic process;GO:0019860 uracil metabolic process;GO:0060574 intestinal epithelial cell maturation		Cancer-related genes:Candidate cancer biomarkers; ENZYME proteins:Transferases; Predicted intracellular proteins; FDA approved drug targets:Small molecule drugs; Enzymes		Raltitrexed; Floxuridine; Trifluridine; Gemcitabine; Fluorouracil; Methotrexate; Pemetrexed; Capecitabine; Thymidine monophosphate; 10-Propargyl-5,8-Dideazafolic Acid; Deoxyuridine monophosphate; S,S-(2-Hydroxyethyl)Thiocysteine; Thymectacin; ANX-510; OSI-7904L; Pralatrexate; 2,4-Diamino-5-phenyl-6-ethylpyrimidine; N-[2-Chloro-5-(trifluoromethyl)phenyl]imidodicarbonimidic diamide; N-(3,5-dimethox…	(M40)PID E2F PATHWAY	(M5898)HALLMARK DNA REPAIR; (M5926)HALLMARK MYC TARGETS V1	1	0	0	0	0	0	1	0	0	0	0	0	0	0	0	0	0
WNT7B	7477	symbol	H. sapiens	7477	H. sapiens	WNT7B	Wnt family member 7B	GO:0016332 establishment or maintenance of polarity of embryonic epithelium;GO:0072060 outer medullary collecting duct development;GO:0072053 renal inner medulla development		Predicted intracellular proteins; Predicted secreted proteins			(M77)PID WNT SIGNALING PATHWAY; (M5493)WNT SIGNALING; (M5883)NABA SECRETED FACTORS		0	0	0	0	0	0	0	0	0	1	0	0	1	0	0	0	0
ZNF114	163071	symbol	H. sapiens	163071	H. sapiens	ZNF114	zinc finger protein 114	GO:0006357 regulation of transcription by RNA polymerase II;GO:0006366 transcription by RNA polymerase II;GO:0006355 regulation of transcription, DNA-templated		Transcription factors:Zinc-coordinating DNA-binding domains; Predicted intracellular proteins	Cytosol;Nucleoplasm (Approved)				0	0	0	0	0	0	0	0	0	0	0	0	0	0	0	0	0

## Sheet: Enrichment
GroupID	Category	Term	Description	LogP	Log(q-value)	InTerm_InList	Genes	Symbols
1_Summary	GO Biological Processes	GO:1903047	mitotic cell cycle process	-13.967	-9.60527	20/726	815,891,991,995,1032,1033,1058,2305,3925,4605,5347,8480,9232,10112,10460,51512,55143,79866,80174,84722,54478,79733,83461,7298,11144,55124,4744,4070,5580,286527	CAMK2A,CCNB1,CDC20,CDC25C,CDKN2D,CDKN3,CENPA,FOXM1,STMN1,MYBL2,PLK1,RAE1,PTTG1,KIF20A,TACC3,GTSE1,CDCA8,BORA,DBF4B,PSRC1,PIMREG,E2F8,CDCA3,TYMS,DMC1,PIWIL2,NEFH,TACSTD2,PRKCD,TMSB15B
1_Member	GO Biological Processes	GO:1903047	mitotic cell cycle process	-13.967	-9.60527	20/726	815,891,991,995,1032,1033,1058,2305,3925,4605,5347,8480,9232,10112,10460,51512,55143,79866,80174,84722	CAMK2A,CCNB1,CDC20,CDC25C,CDKN2D,CDKN3,CENPA,FOXM1,STMN1,MYBL2,PLK1,RAE1,PTTG1,KIF20A,TACC3,GTSE1,CDCA8,BORA,DBF4B,PSRC1
1_Member	GO Biological Processes	GO:0051301	cell division	-10.8078	-6.90443	16/613	891,991,995,1058,3925,5347,8480,9232,10112,10460,54478,55143,79733,79866,83461,84722	CCNB1,CDC20,CDC25C,CENPA,STMN1,PLK1,RAE1,PTTG1,KIF20A,TACC3,PIMREG,CDCA8,E2F8,BORA,CDCA3,PSRC1
1_Member	GO Biological Processes	GO:1902850	microtubule cytoskeleton organization involved in mitosis	-10.789	-6.90443	10/150	891,991,1058,3925,4605,5347,8480,10460,79866,84722	CCNB1,CDC20,CENPA,STMN1,MYBL2,PLK1,RAE1,TACC3,BORA,PSRC1
1_Member	Reactome Gene Sets	R-HSA-69278	Cell Cycle, Mitotic	-10.2859	-6.52629	15/561	891,991,995,1032,1058,2305,4605,5347,7298,8480,9232,10112,51512,55143,79866	CCNB1,CDC20,CDC25C,CDKN2D,CENPA,FOXM1,MYBL2,PLK1,TYMS,RAE1,PTTG1,KIF20A,GTSE1,CDCA8,BORA
1_Member	GO Biological Processes	GO:0007052	mitotic spindle organization	-10.1144	-6.45166	9/123	891,991,3925,4605,5347,8480,10460,79866,84722	CCNB1,CDC20,STMN1,MYBL2,PLK1,RAE1,TACC3,BORA,PSRC1
1_Member	Reactome Gene Sets	R-HSA-1640170	Cell Cycle	-10.0303	-6.44672	16/692	891,991,995,1032,1058,2305,4605,5347,7298,8480,9232,10112,11144,51512,55143,79866	CCNB1,CDC20,CDC25C,CDKN2D,CENPA,FOXM1,MYBL2,PLK1,TYMS,RAE1,PTTG1,KIF20A,DMC1,GTSE1,CDCA8,BORA
1_Member	GO Biological Processes	GO:0010564	regulation of cell cycle process	-9.38204	-5.86543	15/652	891,991,995,1032,5347,8480,9232,10112,10460,51512,55124,79733,79866,80174,84722	CCNB1,CDC20,CDC25C,CDKN2D,PLK1,RAE1,PTTG1,KIF20A,TACC3,GTSE1,PIWIL2,E2F8,BORA,DBF4B,PSRC1
1_Member	GO Biological Processes	GO:0007051	spindle organization	-8.146	-4.82568	9/205	891,991,3925,4605,5347,8480,10460,79866,84722	CCNB1,CDC20,STMN1,MYBL2,PLK1,RAE1,TACC3,BORA,PSRC1
1_Member	GO Biological Processes	GO:0060236	regulation of mitotic spindle organization	-7.17938	-3.9638	5/37	5347,8480,10460,79866,84722	PLK1,RAE1,TACC3,BORA,PSRC1
1_Member	GO Biological Processes	GO:0090224	regulation of spindle organization	-6.94791	-3.76229	5/41	5347,8480,10460,79866,84722	PLK1,RAE1,TACC3,BORA,PSRC1
1_Member	GO Biological Processes	GO:0000226	microtubule cytoskeleton organization	-6.68574	-3.52815	12/628	891,991,1058,3925,4605,4744,5347,8480,10112,10460,79866,84722	CCNB1,CDC20,CENPA,STMN1,MYBL2,NEFH,PLK1,RAE1,KIF20A,TACC3,BORA,PSRC1
1_Member	GO Biological Processes	GO:0070507	regulation of microtubule cytoskeleton organization	-5.36477	-2.53454	6/149	3925,5347,8480,10460,79866,84722	STMN1,PLK1,RAE1,TACC3,BORA,PSRC1
1_Member	GO Biological Processes	GO:0032886	regulation of microtubule-based process	-5.26355	-2.47005	7/239	3925,4744,5347,8480,10460,79866,84722	STMN1,NEFH,PLK1,RAE1,TACC3,BORA,PSRC1
1_Member	GO Biological Processes	GO:0051493	regulation of cytoskeleton organization	-4.73308	-1.98415	9/526	3925,4070,5347,5580,8480,10460,79866,84722,286527	STMN1,TACSTD2,PLK1,PRKCD,RAE1,TACC3,BORA,PSRC1,TMSB15B
2_Summary	Reactome Gene Sets	R-HSA-156711	Polo-like kinase mediated events	-9.15823	-5.69961	5/16	891,995,2305,4605,5347,991,10112,79866,815,1032,1033,10460,51512,80174,84722,55124,1058,5580,11266,79733	CCNB1,CDC25C,FOXM1,MYBL2,PLK1,CDC20,KIF20A,BORA,CAMK2A,CDKN2D,CDKN3,TACC3,GTSE1,DBF4B,PSRC1,PIWIL2,CENPA,PRKCD,DUSP12,E2F8
2_Member	Reactome Gene Sets	R-HSA-156711	Polo-like kinase mediated events	-9.15823	-5.69961	5/16	891,995,2305,4605,5347	CCNB1,CDC25C,FOXM1,MYBL2,PLK1
2_Member	Canonical Pathways	M129	PID PLK1 PATHWAY	-8.42996	-5.0225	6/46	891,991,995,5347,10112,79866	CCNB1,CDC20,CDC25C,PLK1,KIF20A,BORA
2_Member	GO Biological Processes	GO:0044772	mitotic cell cycle phase transition	-6.45983	-3.35019	10/424	815,891,995,1032,1033,2305,5347,10460,51512,80174	CAMK2A,CCNB1,CDC25C,CDKN2D,CDKN3,FOXM1,PLK1,TACC3,GTSE1,DBF4B
2_Member	GO Biological Processes	GO:0000079	regulation of cyclin-dependent protein serine/threonine kinase activity	-6.45662	-3.35019	6/97	891,995,1032,1033,5347,84722	CCNB1,CDC25C,CDKN2D,CDKN3,PLK1,PSRC1
2_Member	GO Biological Processes	GO:1904029	regulation of cyclin-dependent protein kinase activity	-6.35248	-3.2918	6/101	891,995,1032,1033,5347,84722	CCNB1,CDC25C,CDKN2D,CDKN3,PLK1,PSRC1
2_Member	Reactome Gene Sets	R-HSA-69273	Cyclin A/B1/B2 associated events during G2/M transition	-6.13675	-3.11746	4/25	891,995,2305,5347	CCNB1,CDC25C,FOXM1,PLK1
2_Member	Reactome Gene Sets	R-HSA-69275	G2/M Transition	-5.83273	-2.92868	7/196	891,995,2305,4605,5347,51512,79866	CCNB1,CDC25C,FOXM1,MYBL2,PLK1,GTSE1,BORA
2_Member	Reactome Gene Sets	R-HSA-453274	Mitotic G2-G2/M phases	-5.80336	-2.91877	7/198	891,995,2305,4605,5347,51512,79866	CCNB1,CDC25C,FOXM1,MYBL2,PLK1,GTSE1,BORA
2_Member	GO Biological Processes	GO:0044770	cell cycle phase transition	-5.67461	-2.81805	10/518	815,891,995,1032,1033,2305,5347,10460,51512,80174	CAMK2A,CCNB1,CDC25C,CDKN2D,CDKN3,FOXM1,PLK1,TACC3,GTSE1,DBF4B
2_Member	GO Biological Processes	GO:0051783	regulation of nuclear division	-5.53926	-2.69606	6/139	891,991,995,5347,55124,79866	CCNB1,CDC20,CDC25C,PLK1,PIWIL2,BORA
2_Member	Canonical Pathways	M176	PID FOXM1 PATHWAY	-5.292	-2.48659	4/40	891,1058,2305,5347	CCNB1,CENPA,FOXM1,PLK1
2_Member	GO Biological Processes	GO:0071900	regulation of protein serine/threonine kinase activity	-5.014	-2.24335	8/366	891,995,1032,1033,5347,5580,80174,84722	CCNB1,CDC25C,CDKN2D,CDKN3,PLK1,PRKCD,DBF4B,PSRC1
2_Member	GO Biological Processes	GO:0000086	G2/M transition of mitotic cell cycle	-4.34263	-1.67112	5/137	891,995,2305,5347,80174	CCNB1,CDC25C,FOXM1,PLK1,DBF4B
2_Member	GO Biological Processes	GO:0043549	regulation of kinase activity	-4.21817	-1.60545	10/764	891,995,1032,1033,5347,5580,11266,79866,80174,84722	CCNB1,CDC25C,CDKN2D,CDKN3,PLK1,PRKCD,DUSP12,BORA,DBF4B,PSRC1
2_Member	GO Biological Processes	GO:0010971	positive regulation of G2/M transition of mitotic cell cycle	-4.21129	-1.60545	3/27	891,995,80174	CCNB1,CDC25C,DBF4B
2_Member	GO Biological Processes	GO:0044839	cell cycle G2/M phase transition	-4.18308	-1.59223	5/148	891,995,2305,5347,80174	CCNB1,CDC25C,FOXM1,PLK1,DBF4B
2_Member	GO Biological Processes	GO:1902751	positive regulation of cell cycle G2/M phase transition	-4.07155	-1.49518	3/30	891,995,80174	CCNB1,CDC25C,DBF4B
2_Member	GO Biological Processes	GO:0045859	regulation of protein kinase activity	-4.04823	-1.47892	9/645	891,995,1032,1033,5347,5580,79866,80174,84722	CCNB1,CDC25C,CDKN2D,CDKN3,PLK1,PRKCD,BORA,DBF4B,PSRC1
2_Member	GO Biological Processes	GO:0010389	regulation of G2/M transition of mitotic cell cycle	-3.81917	-1.30872	4/94	891,995,5347,80174	CCNB1,CDC25C,PLK1,DBF4B
2_Member	GO Biological Processes	GO:1902749	regulation of cell cycle G2/M phase transition	-3.68252	-1.21844	4/102	891,995,5347,80174	CCNB1,CDC25C,PLK1,DBF4B
2_Member	GO Biological Processes	GO:0007088	regulation of mitotic nuclear division	-3.55691	-1.11948	4/110	891,995,5347,79866	CCNB1,CDC25C,PLK1,BORA
2_Member	GO Biological Processes	GO:0045787	positive regulation of cell cycle	-3.54511	-1.11923	6/316	891,995,55124,79733,80174,84722	CCNB1,CDC25C,PIWIL2,E2F8,DBF4B,PSRC1
2_Member	Reactome Gene Sets	R-HSA-6791312	TP53 Regulates Transcription of Cell Cycle Genes	-3.45812	-1.06159	3/48	891,995,79733	CCNB1,CDC25C,E2F8
2_Member	GO Biological Processes	GO:0090068	positive regulation of cell cycle process	-3.24306	-0.872575	5/236	891,995,55124,79733,80174	CCNB1,CDC25C,PIWIL2,E2F8,DBF4B
2_Member	GO Biological Processes	GO:1901987	regulation of cell cycle phase transition	-3.06486	-0.728453	6/390	891,995,1032,5347,51512,80174	CCNB1,CDC25C,CDKN2D,PLK1,GTSE1,DBF4B
2_Member	WikiPathways	WP4016	DNA IR-damage and cellular response via ATR	-2.79424	-0.525954	3/81	995,2305,5347	CDC25C,FOXM1,PLK1
2_Member	GO Biological Processes	GO:1901990	regulation of mitotic cell cycle phase transition	-2.78554	-0.520737	5/299	891,995,5347,51512,80174	CCNB1,CDC25C,PLK1,GTSE1,DBF4B
2_Member	GO Biological Processes	GO:0007346	regulation of mitotic cell cycle	-2.70481	-0.450308	6/459	891,995,5347,51512,79866,80174	CCNB1,CDC25C,PLK1,GTSE1,BORA,DBF4B
2_Member	Reactome Gene Sets	R-HSA-2565942	Regulation of PLK1 Activity at G2/M Transition	-2.69113	-0.440009	3/88	891,5347,79866	CCNB1,PLK1,BORA
2_Member	GO Biological Processes	GO:1901992	positive regulation of mitotic cell cycle phase transition	-2.62273	-0.388127	3/93	891,995,80174	CCNB1,CDC25C,DBF4B
2_Member	KEGG Pathway	hsa04914	Progesterone-mediated oocyte maturation	-2.58357	-0.361738	3/96	891,995,5347	CCNB1,CDC25C,PLK1
2_Member	KEGG Pathway	ko04914	Progesterone-mediated oocyte maturation	-2.58357	-0.361738	3/96	891,995,5347	CCNB1,CDC25C,PLK1
2_Member	GO Biological Processes	GO:1901989	positive regulation of cell cycle phase transition	-2.36276	-0.1654	3/115	891,995,80174	CCNB1,CDC25C,DBF4B
2_Member	GO Biological Processes	GO:0045931	positive regulation of mitotic cell cycle	-2.3012	-0.124187	3/121	891,995,80174	CCNB1,CDC25C,DBF4B
3_Summary	GO Biological Processes	GO:0000280	nuclear division	-8.34266	-4.98095	12/443	891,991,995,4605,5347,9232,10460,11144,55124,55143,79866,84722,1032,815,1058,51512,8480,10112,54852,79733,5580	CCNB1,CDC20,CDC25C,MYBL2,PLK1,PTTG1,TACC3,DMC1,PIWIL2,CDCA8,BORA,PSRC1,CDKN2D,CAMK2A,CENPA,GTSE1,RAE1,KIF20A,PAQR5,E2F8,PRKCD
3_Member	GO Biological Processes	GO:0000280	nuclear division	-8.34266	-4.98095	12/443	891,991,995,4605,5347,9232,10460,11144,55124,55143,79866,84722	CCNB1,CDC20,CDC25C,MYBL2,PLK1,PTTG1,TACC3,DMC1,PIWIL2,CDCA8,BORA,PSRC1
3_Member	GO Biological Processes	GO:0140014	mitotic nuclear division	-7.98474	-4.70221	10/291	891,991,995,4605,5347,9232,10460,55143,79866,84722	CCNB1,CDC20,CDC25C,MYBL2,PLK1,PTTG1,TACC3,CDCA8,BORA,PSRC1
3_Member	GO Biological Processes	GO:0048285	organelle fission	-7.83728	-4.58951	12/492	891,991,995,4605,5347,9232,10460,11144,55124,55143,79866,84722	CCNB1,CDC20,CDC25C,MYBL2,PLK1,PTTG1,TACC3,DMC1,PIWIL2,CDCA8,BORA,PSRC1
3_Member	Reactome Gene Sets	R-HSA-176417	Phosphorylation of Emi1	-6.35768	-3.2918	3/6	891,991,5347	CCNB1,CDC20,PLK1
3_Member	GO Biological Processes	GO:0000070	mitotic sister chromatid segregation	-6.24705	-3.20756	7/170	891,991,5347,9232,10460,55143,84722	CCNB1,CDC20,PLK1,PTTG1,TACC3,CDCA8,PSRC1
3_Member	WikiPathways	WP179	Cell cycle	-5.86929	-2.92868	6/122	891,991,995,1032,5347,9232	CCNB1,CDC20,CDC25C,CDKN2D,PLK1,PTTG1
3_Member	GO Biological Processes	GO:0098813	nuclear chromosome segregation	-5.83538	-2.92868	8/283	891,991,5347,9232,10460,11144,55143,84722	CCNB1,CDC20,PLK1,PTTG1,TACC3,DMC1,CDCA8,PSRC1
3_Member	KEGG Pathway	hsa04110	Cell cycle	-5.82799	-2.92868	6/124	891,991,995,1032,5347,9232	CCNB1,CDC20,CDC25C,CDKN2D,PLK1,PTTG1
3_Member	KEGG Pathway	hsa04114	Oocyte meiosis	-5.82799	-2.92868	6/124	815,891,991,995,5347,9232	CAMK2A,CCNB1,CDC20,CDC25C,PLK1,PTTG1
3_Member	KEGG Pathway	ko04110	Cell cycle	-5.82799	-2.92868	6/124	891,991,995,1032,5347,9232	CCNB1,CDC20,CDC25C,CDKN2D,PLK1,PTTG1
3_Member	KEGG Pathway	ko04114	Oocyte meiosis	-5.82799	-2.92868	6/124	815,891,991,995,5347,9232	CAMK2A,CCNB1,CDC20,CDC25C,PLK1,PTTG1
3_Member	GO Biological Processes	GO:0000819	sister chromatid segregation	-5.70303	-2.83268	7/205	891,991,5347,9232,10460,55143,84722	CCNB1,CDC20,PLK1,PTTG1,TACC3,CDCA8,PSRC1
3_Member	GO Biological Processes	GO:0007059	chromosome segregation	-5.18227	-2.40034	8/347	891,991,5347,9232,10460,11144,55143,84722	CCNB1,CDC20,PLK1,PTTG1,TACC3,DMC1,CDCA8,PSRC1
3_Member	Reactome Gene Sets	R-HSA-69620	Cell Cycle Checkpoints	-4.68081	-1.94235	7/294	891,991,995,1058,5347,51512,55143	CCNB1,CDC20,CDC25C,CENPA,PLK1,GTSE1,CDCA8
3_Member	GO Biological Processes	GO:1903046	meiotic cell cycle process	-4.61182	-1.88357	6/202	991,995,5347,9232,11144,55124	CDC20,CDC25C,PLK1,PTTG1,DMC1,PIWIL2
3_Member	Reactome Gene Sets	R-HSA-68886	M Phase	-4.59966	-1.88141	8/418	891,991,1058,5347,8480,9232,10112,55143	CCNB1,CDC20,CENPA,PLK1,RAE1,PTTG1,KIF20A,CDCA8
3_Member	Reactome Gene Sets	R-HSA-2500257	Resolution of Sister Chromatid Cohesion	-4.51665	-1.80815	5/126	891,991,1058,5347,55143	CCNB1,CDC20,CENPA,PLK1,CDCA8
3_Member	GO Biological Processes	GO:0010965	regulation of mitotic sister chromatid separation	-4.44568	-1.74673	4/65	891,5347,9232,10460	CCNB1,PLK1,PTTG1,TACC3
3_Member	GO Biological Processes	GO:0051306	mitotic sister chromatid separation	-4.39367	-1.70406	4/67	891,5347,9232,10460	CCNB1,PLK1,PTTG1,TACC3
3_Member	GO Biological Processes	GO:0061982	meiosis I cell cycle process	-4.37313	-1.69266	5/135	995,5347,9232,11144,55124	CDC25C,PLK1,PTTG1,DMC1,PIWIL2
3_Member	GO Biological Processes	GO:0007292	female gamete generation	-4.29778	-1.64027	5/140	891,5347,11144,54852,55124	CCNB1,PLK1,DMC1,PAQR5,PIWIL2
3_Member	GO Biological Processes	GO:0033045	regulation of sister chromatid segregation	-4.27052	-1.63308	4/72	891,5347,9232,10460	CCNB1,PLK1,PTTG1,TACC3
3_Member	GO Biological Processes	GO:1905818	regulation of chromosome separation	-4.27052	-1.63308	4/72	891,5347,9232,10460	CCNB1,PLK1,PTTG1,TACC3
3_Member	Reactome Gene Sets	R-HSA-68882	Mitotic Anaphase	-4.2349	-1.60558	6/236	891,991,1058,5347,9232,55143	CCNB1,CDC20,CENPA,PLK1,PTTG1,CDCA8
3_Member	Reactome Gene Sets	R-HSA-2555396	Mitotic Metaphase and Anaphase	-4.22474	-1.60545	6/237	891,991,1058,5347,9232,55143	CCNB1,CDC20,CENPA,PLK1,PTTG1,CDCA8
3_Member	Reactome Gene Sets	R-HSA-176814	Activation of APC/C and APC/C:Cdc20 mediated degradation of mitotic proteins	-4.15613	-1.57257	4/77	891,991,5347,9232	CCNB1,CDC20,PLK1,PTTG1
3_Member	GO Biological Processes	GO:0051321	meiotic cell cycle	-3.99422	-1.43185	6/261	991,995,5347,9232,11144,55124	CDC20,CDC25C,PLK1,PTTG1,DMC1,PIWIL2
3_Member	Reactome Gene Sets	R-HSA-174143	APC/C-mediated degradation of cell cycle proteins	-3.93009	-1.38792	4/88	891,991,5347,9232	CCNB1,CDC20,PLK1,PTTG1
3_Member	Reactome Gene Sets	R-HSA-453276	Regulation of mitotic cell cycle	-3.93009	-1.38792	4/88	891,991,5347,9232	CCNB1,CDC20,PLK1,PTTG1
3_Member	GO Biological Processes	GO:0048477	oogenesis	-3.89224	-1.3566	4/90	891,11144,54852,55124	CCNB1,DMC1,PAQR5,PIWIL2
3_Member	GO Biological Processes	GO:0051983	regulation of chromosome segregation	-3.87365	-1.35079	4/91	891,5347,9232,10460	CCNB1,PLK1,PTTG1,TACC3
3_Member	GO Biological Processes	GO:0051304	chromosome separation	-3.78387	-1.29139	4/96	891,5347,9232,10460	CCNB1,PLK1,PTTG1,TACC3
3_Member	Reactome Gene Sets	R-HSA-141424	Amplification of signal from the kinetochores	-3.78387	-1.29139	4/96	991,1058,5347,55143	CDC20,CENPA,PLK1,CDCA8
3_Member	Reactome Gene Sets	R-HSA-141444	Amplification of signal from unattached kinetochores via a MAD2 inhibitory signal	-3.78387	-1.29139	4/96	991,1058,5347,55143	CDC20,CENPA,PLK1,CDCA8
3_Member	GO Biological Processes	GO:0140013	meiotic nuclear division	-3.72806	-1.24141	5/185	991,5347,9232,11144,55124	CDC20,PLK1,PTTG1,DMC1,PIWIL2
3_Member	GO Biological Processes	GO:0010948	negative regulation of cell cycle process	-3.71329	-1.23807	6/294	891,1032,5347,9232,51512,79733	CCNB1,CDKN2D,PLK1,PTTG1,GTSE1,E2F8
3_Member	Reactome Gene Sets	R-HSA-2467813	Separation of Sister Chromatids	-3.66375	-1.20513	5/191	991,1058,5347,9232,55143	CDC20,CENPA,PLK1,PTTG1,CDCA8
3_Member	GO Biological Processes	GO:0033046	negative regulation of sister chromatid segregation	-3.60028	-1.15765	3/43	891,5347,9232	CCNB1,PLK1,PTTG1
3_Member	GO Biological Processes	GO:0033048	negative regulation of mitotic sister chromatid segregation	-3.60028	-1.15765	3/43	891,5347,9232	CCNB1,PLK1,PTTG1
3_Member	GO Biological Processes	GO:2000816	negative regulation of mitotic sister chromatid separation	-3.60028	-1.15765	3/43	891,5347,9232	CCNB1,PLK1,PTTG1
3_Member	GO Biological Processes	GO:0051985	negative regulation of chromosome segregation	-3.54142	-1.11923	3/45	891,5347,9232	CCNB1,PLK1,PTTG1
3_Member	GO Biological Processes	GO:1905819	negative regulation of chromosome separation	-3.54142	-1.11923	3/45	891,5347,9232	CCNB1,PLK1,PTTG1
3_Member	Reactome Gene Sets	R-HSA-68877	Mitotic Prometaphase	-3.53176	-1.11453	5/204	891,991,1058,5347,55143	CCNB1,CDC20,CENPA,PLK1,CDCA8
3_Member	GO Biological Processes	GO:0033047	regulation of mitotic sister chromatid segregation	-3.51302	-1.10485	3/46	891,5347,9232	CCNB1,PLK1,PTTG1
3_Member	Reactome Gene Sets	R-HSA-69618	Mitotic Spindle Checkpoint	-3.51232	-1.10485	4/113	991,1058,5347,55143	CDC20,CENPA,PLK1,CDCA8
3_Member	Reactome Gene Sets	R-HSA-195258	RHO GTPase Effectors	-3.46595	-1.06328	6/327	991,995,1058,5347,5580,55143	CDC20,CDC25C,CENPA,PLK1,PRKCD,CDCA8
3_Member	Reactome Gene Sets	R-HSA-9648025	EML4 and NUDC in mitotic spindle formation	-3.45482	-1.06159	4/117	991,1058,5347,55143	CDC20,CENPA,PLK1,CDCA8
3_Member	Reactome Gene Sets	R-HSA-2980766	Nuclear Envelope Breakdown	-3.35522	-0.971238	3/52	891,5347,8480	CCNB1,PLK1,RAE1
3_Member	GO Biological Processes	GO:0007127	meiosis I	-3.29427	-0.919332	4/129	5347,9232,11144,55124	PLK1,PTTG1,DMC1,PIWIL2
3_Member	Reactome Gene Sets	R-HSA-5663220	RHO GTPases Activate Formins	-3.16074	-0.794668	4/140	991,1058,5347,55143	CDC20,CENPA,PLK1,CDCA8
3_Member	GO Biological Processes	GO:0007091	metaphase/anaphase transition of mitotic cell cycle	-3.13076	-0.77337	3/62	891,5347,10460	CCNB1,PLK1,TACC3
3_Member	GO Biological Processes	GO:0045143	homologous chromosome segregation	-3.13076	-0.77337	3/62	5347,9232,11144	PLK1,PTTG1,DMC1
3_Member	GO Biological Processes	GO:0045786	negative regulation of cell cycle	-3.09384	-0.740731	6/385	891,1032,5347,9232,51512,79733	CCNB1,CDKN2D,PLK1,PTTG1,GTSE1,E2F8
3_Member	GO Biological Processes	GO:0044784	metaphase/anaphase transition of cell cycle	-3.07085	-0.730334	3/65	891,5347,10460	CCNB1,PLK1,TACC3
3_Member	GO Biological Processes	GO:0033044	regulation of chromosome organization	-2.91096	-0.604417	5/280	891,5347,9232,10460,55124	CCNB1,PLK1,PTTG1,TACC3,PIWIL2
3_Member	Reactome Gene Sets	R-HSA-174178	APC/C:Cdh1 mediated degradation of Cdc20 and other APC/C:Cdh1 targeted proteins in late mitosis/early G1	-2.90737	-0.604417	3/74	991,5347,9232	CDC20,PLK1,PTTG1
3_Member	Reactome Gene Sets	R-HSA-176409	APC/C:Cdc20 mediated degradation of mitotic proteins	-2.87392	-0.584089	3/76	891,991,9232	CCNB1,CDC20,PTTG1
3_Member	Reactome Gene Sets	R-HSA-8852276	The role of GTSE1 in G2/M progression after G2 checkpoint	-2.85754	-0.571379	3/77	891,5347,51512	CCNB1,PLK1,GTSE1
3_Member	Reactome Gene Sets	R-HSA-176408	Regulation of APC/C activators between G1/S and early anaphase	-2.79424	-0.525954	3/81	891,991,5347	CCNB1,CDC20,PLK1
3_Member	GO Biological Processes	GO:2001251	negative regulation of chromosome organization	-2.6496	-0.405166	3/91	891,5347,9232	CCNB1,PLK1,PTTG1
3_Member	GO Biological Processes	GO:0045132	meiotic chromosome segregation	-2.63609	-0.398231	3/92	5347,9232,11144	PLK1,PTTG1,DMC1
3_Member	GO Biological Processes	GO:0007276	gamete generation	-2.35426	-0.159864	7/721	891,995,5347,9232,11144,54852,55124	CCNB1,CDC25C,PLK1,PTTG1,DMC1,PAQR5,PIWIL2
3_Member	GO Biological Processes	GO:0022412	cellular process involved in reproduction in multicellular organism	-2.31993	-0.134316	5/384	891,5347,11144,54852,55124	CCNB1,PLK1,DMC1,PAQR5,PIWIL2
3_Member	GO Biological Processes	GO:1901988	negative regulation of cell cycle phase transition	-2.25325	-0.0902346	4/249	891,1032,5347,51512	CCNB1,CDKN2D,PLK1,GTSE1
3_Member	GO Biological Processes	GO:0007093	mitotic cell cycle checkpoint signaling	-2.22415	-0.0665601	3/129	891,5347,51512	CCNB1,PLK1,GTSE1
3_Member	KEGG Pathway	hsa04068	foxo signaling pathway	-2.15219	0	3/137	891,1032,5347	CCNB1,CDKN2D,PLK1
3_Member	Reactome Gene Sets	R-HSA-68875	Mitotic Prophase	-2.10953	0	3/142	891,5347,8480	CCNB1,PLK1,RAE1
3_Member	GO Biological Processes	GO:0007281	germ cell development	-2.08751	0	4/278	891,11144,54852,55124	CCNB1,DMC1,PAQR5,PIWIL2
4_Summary	Canonical Pathways	M14	PID AURORA B PATHWAY	-5.33682	-2.51918	4/39	1058,3925,10112,55143,5347,79733,84722	CENPA,STMN1,KIF20A,CDCA8,PLK1,E2F8,PSRC1
4_Member	Canonical Pathways	M14	PID AURORA B PATHWAY	-5.33682	-2.51918	4/39	1058,3925,10112,55143	CENPA,STMN1,KIF20A,CDCA8
4_Member	GO Biological Processes	GO:0000281	mitotic cytokinesis	-4.29441	-1.64027	4/71	1058,3925,5347,10112	CENPA,STMN1,PLK1,KIF20A
4_Member	GO Biological Processes	GO:0000910	cytokinesis	-3.86383	-1.34722	5/173	1058,3925,5347,10112,79733	CENPA,STMN1,PLK1,KIF20A,E2F8
4_Member	GO Biological Processes	GO:0061640	cytoskeleton-dependent cytokinesis	-3.71557	-1.23807	4/100	1058,3925,5347,10112	CENPA,STMN1,PLK1,KIF20A
4_Member	GO Biological Processes	GO:0032465	regulation of cytokinesis	-2.63609	-0.398231	3/92	5347,10112,79733	PLK1,KIF20A,E2F8
4_Member	GO Biological Processes	GO:0001578	microtubule bundle formation	-2.37336	-0.170009	3/114	5347,10112,84722	PLK1,KIF20A,PSRC1
5_Summary	GO Biological Processes	GO:0051656	establishment of organelle localization	-4.74391	-1.98426	8/399	891,1058,4744,5347,6813,55143,79083,84722	CCNB1,CENPA,NEFH,PLK1,STXBP2,CDCA8,MLPH,PSRC1
5_Member	GO Biological Processes	GO:0051656	establishment of organelle localization	-4.74391	-1.98426	8/399	891,1058,4744,5347,6813,55143,79083,84722	CCNB1,CENPA,NEFH,PLK1,STXBP2,CDCA8,MLPH,PSRC1
5_Member	GO Biological Processes	GO:0051640	organelle localization	-3.88498	-1.35578	8/529	891,1058,4744,5347,6813,55143,79083,84722	CCNB1,CENPA,NEFH,PLK1,STXBP2,CDCA8,MLPH,PSRC1
5_Member	GO Biological Processes	GO:0007080	mitotic metaphase plate congression	-3.3308	-0.951367	3/53	891,55143,84722	CCNB1,CDCA8,PSRC1
5_Member	GO Biological Processes	GO:0051310	metaphase plate congression	-3.01382	-0.6935	3/68	891,55143,84722	CCNB1,CDCA8,PSRC1
5_Member	GO Biological Processes	GO:0051303	establishment of chromosome localization	-2.76383	-0.502496	3/83	891,55143,84722	CCNB1,CDCA8,PSRC1
5_Member	GO Biological Processes	GO:0050000	chromosome localization	-2.7342	-0.476297	3/85	891,55143,84722	CCNB1,CDCA8,PSRC1
6_Summary	GO Biological Processes	GO:0010639	negative regulation of organelle organization	-4.18534	-1.59223	7/352	891,3925,4070,5347,5580,9232,286527,2670,29091,84722,4744,2702	CCNB1,STMN1,TACSTD2,PLK1,PRKCD,PTTG1,TMSB15B,GFAP,STXBP6,PSRC1,NEFH,GJA5
6_Member	GO Biological Processes	GO:0010639	negative regulation of organelle organization	-4.18534	-1.59223	7/352	891,3925,4070,5347,5580,9232,286527	CCNB1,STMN1,TACSTD2,PLK1,PRKCD,PTTG1,TMSB15B
6_Member	GO Biological Processes	GO:0051494	negative regulation of cytoskeleton organization	-2.92508	-0.612593	4/162	3925,4070,5580,286527	STMN1,TACSTD2,PRKCD,TMSB15B
6_Member	GO Biological Processes	GO:0051129	negative regulation of cellular component organization	-2.89091	-0.593662	8/748	891,2670,3925,4070,5347,5580,9232,286527	CCNB1,GFAP,STMN1,TACSTD2,PLK1,PRKCD,PTTG1,TMSB15B
6_Member	GO Biological Processes	GO:1902904	negative regulation of supramolecular fiber organization	-2.88604	-0.592512	4/166	3925,4070,5580,286527	STMN1,TACSTD2,PRKCD,TMSB15B
6_Member	GO Biological Processes	GO:0043254	regulation of protein-containing complex assembly	-2.83748	-0.554956	6/432	2670,3925,5580,29091,84722,286527	GFAP,STMN1,PRKCD,STXBP6,PSRC1,TMSB15B
6_Member	GO Biological Processes	GO:0032272	negative regulation of protein polymerization	-2.82546	-0.546539	3/79	3925,5580,286527	STMN1,PRKCD,TMSB15B
6_Member	GO Biological Processes	GO:0032271	regulation of protein polymerization	-2.36779	-0.16745	4/231	3925,5580,84722,286527	STMN1,PRKCD,PSRC1,TMSB15B
6_Member	GO Biological Processes	GO:1902903	regulation of supramolecular fiber organization	-2.33899	-0.150467	5/380	3925,4070,5580,84722,286527	STMN1,TACSTD2,PRKCD,PSRC1,TMSB15B
6_Member	GO Biological Processes	GO:0097435	supramolecular fiber organization	-2.27465	-0.10046	7/746	2670,3925,4070,4744,5580,84722,286527	GFAP,STMN1,TACSTD2,NEFH,PRKCD,PSRC1,TMSB15B
6_Member	GO Biological Processes	GO:0032970	regulation of actin filament-based process	-2.26417	-0.0927917	5/396	2702,3925,4070,5580,286527	GJA5,STMN1,TACSTD2,PRKCD,TMSB15B
6_Member	GO Biological Processes	GO:0031333	negative regulation of protein-containing complex assembly	-2.10953	0	3/142	3925,5580,286527	STMN1,PRKCD,TMSB15B
6_Member	GO Biological Processes	GO:0110053	regulation of actin filament organization	-2.09828	0	4/276	3925,4070,5580,286527	STMN1,TACSTD2,PRKCD,TMSB15B
7_Summary	WikiPathways	WP2446	Retinoblastoma gene in cancer	-3.93009	-1.38792	4/88	891,3925,5947,7298,1032,4605,991,11144	CCNB1,STMN1,RBP1,TYMS,CDKN2D,MYBL2,CDC20,DMC1
7_Member	WikiPathways	WP2446	Retinoblastoma gene in cancer	-3.93009	-1.38792	4/88	891,3925,5947,7298	CCNB1,STMN1,RBP1,TYMS
7_Member	Reactome Gene Sets	R-HSA-453279	Mitotic G1 phase and G1/S transition	-3.05974	-0.727414	4/149	891,1032,4605,7298	CCNB1,CDKN2D,MYBL2,TYMS
7_Member	GO Biological Processes	GO:0021700	developmental maturation	-2.07684	0	4/280	891,991,7298,11144	CCNB1,CDC20,TYMS,DMC1
8_Summary	GO Biological Processes	GO:0051347	positive regulation of transferase activity	-3.70075	-1.23114	8/563	891,991,5347,5580,11266,79866,80174,84722	CCNB1,CDC20,PLK1,PRKCD,DUSP12,BORA,DBF4B,PSRC1
8_Member	GO Biological Processes	GO:0051347	positive regulation of transferase activity	-3.70075	-1.23114	8/563	891,991,5347,5580,11266,79866,80174,84722	CCNB1,CDC20,PLK1,PRKCD,DUSP12,BORA,DBF4B,PSRC1
8_Member	GO Biological Processes	GO:0033674	positive regulation of kinase activity	-2.60797	-0.376591	6/480	891,5580,11266,79866,80174,84722	CCNB1,PRKCD,DUSP12,BORA,DBF4B,PSRC1
8_Member	GO Biological Processes	GO:0045860	positive regulation of protein kinase activity	-2.25055	-0.0902346	5/399	891,5580,79866,80174,84722	CCNB1,PRKCD,BORA,DBF4B,PSRC1
8_Member	GO Biological Processes	GO:0032147	activation of protein kinase activity	-2.0605	0	3/148	5580,79866,80174	PRKCD,BORA,DBF4B
9_Summary	GO Biological Processes	GO:0051445	regulation of meiotic cell cycle	-3.43157	-1.04299	3/49	991,995,55124	CDC20,CDC25C,PIWIL2
9_Member	GO Biological Processes	GO:0051445	regulation of meiotic cell cycle	-3.43157	-1.04299	3/49	991,995,55124	CDC20,CDC25C,PIWIL2
10_Summary	KEGG Pathway	hsa05166	HTLV-I infection	-3.08409	-0.739415	5/256	991,3115,4605,7477,9232,5347	CDC20,HLA-DPB1,MYBL2,WNT7B,PTTG1,PLK1
10_Member	KEGG Pathway	hsa05166	HTLV-I infection	-3.08409	-0.739415	5/256	991,3115,4605,7477,9232	CDC20,HLA-DPB1,MYBL2,WNT7B,PTTG1
10_Member	KEGG Pathway	ko05166	HTLV-I infection	-3.08409	-0.739415	5/256	991,3115,4605,7477,9232	CDC20,HLA-DPB1,MYBL2,WNT7B,PTTG1
10_Member	GO Biological Processes	GO:0090307	mitotic spindle assembly	-3.01382	-0.6935	3/68	991,4605,5347	CDC20,MYBL2,PLK1
10_Member	GO Biological Processes	GO:0051225	spindle assembly	-2.14352	0	3/138	991,4605,5347	CDC20,MYBL2,PLK1
11_Summary	WikiPathways	WP536	Calcium regulation in cardiac cells	-3.02755	-0.699264	4/152	489,815,2702,5580,3925,4605,3115,8480,5347,1032	ATP2A3,CAMK2A,GJA5,PRKCD,STMN1,MYBL2,HLA-DPB1,RAE1,PLK1,CDKN2D
11_Member	WikiPathways	WP536	Calcium regulation in cardiac cells	-3.02755	-0.699264	4/152	489,815,2702,5580	ATP2A3,CAMK2A,GJA5,PRKCD
11_Member	WikiPathways	WP437	EGF/EGFR signaling pathway	-2.90543	-0.604417	4/164	815,3925,4605,5580	CAMK2A,STMN1,MYBL2,PRKCD
11_Member	Reactome Gene Sets	R-HSA-877300	Interferon gamma signaling	-2.6496	-0.405166	3/91	815,3115,5580	CAMK2A,HLA-DPB1,PRKCD
11_Member	Reactome Gene Sets	R-HSA-913531	Interferon Signaling	-2.59904	-0.370868	4/199	815,3115,5580,8480	CAMK2A,HLA-DPB1,PRKCD,RAE1
11_Member	GO Biological Processes	GO:0018107	peptidyl-threonine phosphorylation	-2.34186	-0.150467	3/117	815,5347,5580	CAMK2A,PLK1,PRKCD
11_Member	GO Biological Processes	GO:0071901	negative regulation of protein serine/threonine kinase activity	-2.31123	-0.128496	3/120	1032,5347,5580	CDKN2D,PLK1,PRKCD
11_Member	GO Biological Processes	GO:0018210	peptidyl-threonine modification	-2.25241	-0.0902346	3/126	815,5347,5580	CAMK2A,PLK1,PRKCD
12_Summary	GO Biological Processes	GO:0007605	sensory perception of sound	-3.00647	-0.690088	4/154	501,1032,5077,55584	ALDH7A1,CDKN2D,PAX3,CHRNA9
12_Member	GO Biological Processes	GO:0007605	sensory perception of sound	-3.00647	-0.690088	4/154	501,1032,5077,55584	ALDH7A1,CDKN2D,PAX3,CHRNA9
12_Member	GO Biological Processes	GO:0050954	sensory perception of mechanical stimulus	-2.80185	-0.526506	4/175	501,1032,5077,55584	ALDH7A1,CDKN2D,PAX3,CHRNA9
13_Summary	KEGG Pathway	hsa04916	Melanogenesis	-2.52114	-0.305564	3/101	815,4157,7477	CAMK2A,MC1R,WNT7B
13_Member	KEGG Pathway	hsa04916	Melanogenesis	-2.52114	-0.305564	3/101	815,4157,7477	CAMK2A,MC1R,WNT7B
13_Member	KEGG Pathway	ko04916	Melanogenesis	-2.52114	-0.305564	3/101	815,4157,7477	CAMK2A,MC1R,WNT7B
14_Summary	GO Biological Processes	GO:0035335	peptidyl-tyrosine dephosphorylation	-2.50906	-0.296572	3/102	995,1033,11266,5580	CDC25C,CDKN3,DUSP12,PRKCD
14_Member	GO Biological Processes	GO:0035335	peptidyl-tyrosine dephosphorylation	-2.50906	-0.296572	3/102	995,1033,11266	CDC25C,CDKN3,DUSP12
14_Member	GO Biological Processes	GO:0006470	protein dephosphorylation	-2.04016	0	4/287	995,1033,5580,11266	CDC25C,CDKN3,PRKCD,DUSP12
15_Summary	GO Biological Processes	GO:0000082	G1/S transition of mitotic cell cycle	-2.48576	-0.27634	4/214	815,1032,1033,51512	CAMK2A,CDKN2D,CDKN3,GTSE1
15_Member	GO Biological Processes	GO:0000082	G1/S transition of mitotic cell cycle	-2.48576	-0.27634	4/214	815,1032,1033,51512	CAMK2A,CDKN2D,CDKN3,GTSE1
15_Member	GO Biological Processes	GO:0044843	cell cycle G1/S phase transition	-2.30294	-0.124187	4/241	815,1032,1033,51512	CAMK2A,CDKN2D,CDKN3,GTSE1
16_Summary	GO Biological Processes	GO:0006281	DNA repair	-2.43708	-0.230707	6/520	1032,2305,4157,9232,9557,11144,5580	CDKN2D,FOXM1,MC1R,PTTG1,CHD1L,DMC1,PRKCD
16_Member	GO Biological Processes	GO:0006281	DNA repair	-2.43708	-0.230707	6/520	1032,2305,4157,9232,9557,11144	CDKN2D,FOXM1,MC1R,PTTG1,CHD1L,DMC1
16_Member	GO Biological Processes	GO:0009411	response to UV	-2.04465	0	3/150	1032,4157,5580	CDKN2D,MC1R,PRKCD
17_Summary	GO Biological Processes	GO:0030162	regulation of proteolysis	-2.25606	-0.0902346	7/752	489,710,991,1032,5347,9232,83595	ATP2A3,SERPING1,CDC20,CDKN2D,PLK1,PTTG1,SOX7
17_Member	GO Biological Processes	GO:0030162	regulation of proteolysis	-2.25606	-0.0902346	7/752	489,710,991,1032,5347,9232,83595	ATP2A3,SERPING1,CDC20,CDKN2D,PLK1,PTTG1,SOX7
17_Member	GO Biological Processes	GO:0052548	regulation of endopeptidase activity	-2.09621	0	5/435	489,710,1032,9232,83595	ATP2A3,SERPING1,CDKN2D,PTTG1,SOX7
