# Supplementary material for: Transcriptional profiling of Hutchinson-Gilford Progeria syndrome fibroblasts reveals deficits in mesenchymal stem cell commitment to differentiation related to early events in endochondral ossification
Source: eLife journal article supplement (doi:10.7554/elife.81290), 2022-12-29
Supplement: table1-data1 [file metascape_result.xlsx]

## Sheet: Annotation
MyList	Gene ID	Type	Tax ID	Homologene Gene ID	Homologene Gene Tax ID	Gene Symbol	Description	Biological Process (GO)	Kinase Class (UniProt)	Protein Function (Protein Atlas)	Subcellular Location (Protein Atlas)	Drug (DrugBank)	Canonical Pathways	Hallmark Gene Sets	R-HSA-3214815 HDACs deacetylate histones	GO:0006342 chromatin silencing	GO:0045653 negative regulation of megakar	GO:0060969 negative regulation of gene si	WP4286 Genotoxicity pathway	WP3624 Lung fibrosis	M5884 NABA CORE MATRISOME	WP615 Senescence and autophagy in ca	GO:0019730 antimicrobial humoral response	GO:0051235 maintenance of location	GO:0001568 blood vessel development	M167 PID AP1 PATHWAY	GO:0030198 extracellular matrix organizat	WP4300 Extracellular vesicles in the	GO:0019915 lipid storage	GO:0035633 maintenance of blood-brain bar	CORUM:3055 Nop56p-associated pre-rRNA com	GO:0071456 cellular response to hypoxia	GO:0032526 response to retinoic acid	GO:0009612 response to mechanical stimulu
ABCA8	10351	symbol	H. sapiens	10351	H. sapiens	ABCA8	ATP binding cassette subfamily A member 8	GO:0006686 sphingomyelin biosynthetic process;GO:0006684 sphingomyelin metabolic process;GO:0010875 positive regulation of cholesterol efflux		Transporters:Primary Active Transporters	Nucleoplasm (Approved); Additional: Cytosol			(M5948)HALLMARK BILE ACID METABOLISM	0	0	0	0	0	0	0	0	0	0	0	0	0	0	1	0	0	0	0	0
ABCG1	9619	symbol	H. sapiens	9619	H. sapiens	ABCG1	ATP binding cassette subfamily G member 1	GO:1904409 regulation of secretory granule organization;GO:1904411 positive regulation of secretory granule organization;GO:0071403 cellular response to high density lipoprotein particle stimulus		Predicted intracellular proteins; Transporters:Primary Active Transporters	Golgi apparatus;Vesicles (Supported)	ATP			1	0	1	0	0	0	0	0	0	1	0	0	0	0	1	0	0	0	0	0
ABHD17A	81926	symbol	H. sapiens	81926	H. sapiens	ABHD17A	abhydrolase domain containing 17A, depalmitoylase	GO:1902816 regulation of protein localization to microtubule;GO:1902817 negative regulation of protein localization to microtubule;GO:0002084 protein depalmitoylation		Predicted intracellular proteins; ENZYME proteins:Hydrolases; Enzymes	Vesicles (Approved); Additional: Nuclear speckles				0	0	0	0	0	0	0	0	0	0	0	0	0	1	0	0	0	0	0	0
ACOT1	641371	symbol	H. sapiens	641371	H. sapiens	ACOT1	acyl-CoA thioesterase 1	GO:0000038 very long-chain fatty acid metabolic process;GO:0006637 acyl-CoA metabolic process;GO:0035383 thioester metabolic process		Predicted intracellular proteins; ENZYME proteins:Hydrolases; Enzymes	Mitochondria (Approved)				0	0	0	0	0	0	0	0	0	0	0	0	0	0	0	0	0	0	0	0
ACTG2	72	symbol	H. sapiens	72	H. sapiens	ACTG2	actin gamma 2, smooth muscle	GO:0090131 mesenchyme migration;GO:0072132 mesenchyme morphogenesis;GO:0060485 mesenchyme development		Predicted intracellular proteins; Disease related genes			(M16801)SIG REGULATION OF THE ACTIN CYTOSKELETON BY RHO GTPASES	(M5915)HALLMARK APICAL JUNCTION	0	0	0	0	0	1	0	0	0	0	0	0	0	0	0	0	1	0	0	0
ADAMTS1	9510	symbol	H. sapiens	9510	H. sapiens	ADAMTS1	ADAM metallopeptidase with thrombospondin type 1 motif 1	GO:0001542 ovulation from ovarian follicle;GO:0060347 heart trabecula formation;GO:0030728 ovulation		Cancer-related genes:Candidate cancer biomarkers; Predicted intracellular proteins; Predicted secreted proteins; Transporters:Accessory Factors Involved in Transport	Plasma membrane (Approved)		(M3468)NABA ECM REGULATORS; (M5885)NABA MATRISOME ASSOCIATED; (M5889)NABA MATRISOME	(M5908)HALLMARK ANDROGEN RESPONSE	0	0	0	0	0	0	1	1	0	0	1	0	1	0	0	0	0	0	0	0
ADAMTS15	170689	symbol	H. sapiens	170689	H. sapiens	ADAMTS15	ADAM metallopeptidase with thrombospondin type 1 motif 15	GO:0007520 myoblast fusion;GO:0000768 syncytium formation by plasma membrane fusion;GO:0140253 cell-cell fusion		Predicted secreted proteins	Cytosol (Approved)		(M3468)NABA ECM REGULATORS; (M5885)NABA MATRISOME ASSOCIATED; (M5889)NABA MATRISOME		0	0	0	0	0	0	0	0	0	0	0	0	1	0	0	0	0	0	0	0
AHR	196	symbol	H. sapiens	196	H. sapiens	AHR	aryl hydrocarbon receptor	GO:0002841 negative regulation of T cell mediated immune response to tumor cell;GO:1904613 cellular response to 2,3,7,8-tetrachlorodibenzodioxine;GO:0002835 negative regulation of response to tumor cell		Cancer-related genes:Candidate cancer biomarkers; Predicted intracellular proteins; Transcription factors:Basic domains	Cytosol (Supported); Additional: Nucleoplasm	Omeprazole; Mexiletine; Nimodipine; Flutamide; Atorvastatin; Leflunomide; Ginseng; Indirubin-3'-monoxime; Resveratrol; Quercetin; beta-Naphthoflavone; Emodin; 1-[(4S)-4-amino-5-(1,3-benzothiazol-2-yl)-5-oxopentyl]guanidine; Diosmin; Indigotindisulfonic acid; Kynurenic Acid; Epigallocatechin gallate; Cantharidin; Indirubin		(M5947)HALLMARK IL2 STAT5 SIGNALING; (M5932)HALLMARK INFLAMMATORY RESPONSE	0	0	0	0	0	1	0	0	0	0	1	0	0	0	0	0	0	0	0	1
ANKRD30BL	554226	symbol	H. sapiens	554226	H. sapiens	ANKRD30BL	ankyrin repeat domain 30B like			Predicted intracellular proteins					0	0	0	0	0	0	0	0	0	0	0	0	0	0	0	0	0	0	0	0
AP1S3	130340	symbol	H. sapiens	130340	H. sapiens	AP1S3	adaptor related protein complex 1 subunit sigma 3	GO:0006605 protein targeting;GO:0006886 intracellular protein transport;GO:0046907 intracellular transport		Predicted intracellular proteins; Disease related genes	Vesicles (Supported)				0	0	0	0	0	0	0	0	0	0	0	0	0	0	0	0	0	0	0	0
ASPN	54829	symbol	H. sapiens	54829	H. sapiens	ASPN	asporin	GO:0070171 negative regulation of tooth mineralization;GO:0070170 regulation of tooth mineralization;GO:0034505 tooth mineralization		Predicted secreted proteins; Disease related genes	Nucleoplasm (Uncertain); Additional: Cytosol		(M5882)NABA PROTEOGLYCANS; (M5884)NABA CORE MATRISOME; (M5889)NABA MATRISOME		0	0	0	0	0	0	1	0	0	0	0	0	0	0	0	0	0	0	0	0
ATP5E	514	gene_synonym	H. sapiens	514	H. sapiens	ATP5F1E	ATP synthase F1 subunit epsilon	GO:0042776 mitochondrial ATP synthesis coupled proton transport;GO:0015985 energy coupled proton transport, down electrochemical gradient;GO:0015986 ATP synthesis coupled proton transport		Predicted intracellular proteins; Disease related genes				(M5936)HALLMARK OXIDATIVE PHOSPHORYLATION	0	0	0	0	0	0	0	0	0	0	0	0	0	0	0	0	0	0	0	0
ATP8B1	5205	symbol	H. sapiens	5205	H. sapiens	ATP8B1	ATPase phospholipid transporting 8B1	GO:0021650 vestibulocochlear nerve formation;GO:0032534 regulation of microvillus assembly;GO:0006855 drug transmembrane transport		Predicted intracellular proteins; Transporters:Primary Active Transporters; ENZYME proteins:Hydrolases; Enzymes; Disease related genes; Potential drug targets	Cytosol;Plasma membrane (Supported); Additional: Nuclear bodies;Nucleoplasm			(M5916)HALLMARK APICAL SURFACE	0	0	0	0	0	0	0	0	0	0	0	0	0	0	1	0	0	0	0	1
BACH1	571	symbol	H. sapiens	571	H. sapiens	BACH1	BTB domain and CNC homolog 1	GO:0000117 regulation of transcription involved in G2/M transition of mitotic cell cycle;GO:0061418 regulation of transcription from RNA polymerase II promoter in response to hypoxia;GO:0000083 regulation of transcription involved in G1/S transition of mitotic cell cycle		Predicted intracellular proteins; Transcription factors:Basic domains	Nucleoplasm (Approved); Additional: Cytosol			(M5945)HALLMARK HEME METABOLISM	1	0	0	0	0	0	0	0	0	0	0	0	0	0	0	0	0	1	0	0
BLID	414899	symbol	H. sapiens	414899	H. sapiens	BLID	BH3-like motif containing, cell death inducer	GO:0043280 positive regulation of cysteine-type endopeptidase activity involved in apoptotic process;GO:2001056 positive regulation of cysteine-type endopeptidase activity;GO:0010950 positive regulation of endopeptidase activity		Predicted intracellular proteins					0	0	0	0	0	0	0	0	0	0	0	0	0	0	0	0	0	0	0	0
BST1	683	symbol	H. sapiens	683	H. sapiens	BST1	bone marrow stromal cell antigen 1	GO:2001044 regulation of integrin-mediated signaling pathway;GO:0090022 regulation of neutrophil chemotaxis;GO:0090322 regulation of superoxide metabolic process		Predicted intracellular proteins; ENZYME proteins:Hydrolases; Enzymes; CD markers		Etheno-NAD; Nicotinamide; Adenosine 5'-[gamma-thio]triphosphate; Nicotinamide Mononucleotide; Etheno-Nadp			0	0	0	0	0	1	0	0	1	0	0	0	0	0	0	0	0	0	0	0
C1orf198	84886	symbol	H. sapiens	84886	H. sapiens	C1orf198	chromosome 1 open reading frame 198			Predicted intracellular proteins	Cytosol (Supported)				0	0	0	0	0	0	0	0	0	0	0	0	0	0	0	0	0	0	0	0
C3	718	symbol	H. sapiens	718	H. sapiens	C3	complement C3	GO:0001798 positive regulation of type IIa hypersensitivity;GO:0002894 positive regulation of type II hypersensitivity;GO:0001970 positive regulation of activation of membrane attack complex		Candidate cardiovascular disease genes; FDA approved drug targets:Biotech drugs; Predicted intracellular proteins; Predicted secreted proteins; Disease related genes		Human immunoglobulin G; Zinc; S-Hydroxycysteine; Mirococept; Copper; Zinc acetate; Zinc chloride; Zinc sulfate, unspecified form	(M119)PID ERB GENOMIC PATHWAY; (M169)PID INTEGRIN2 PATHWAY; (M200)PID ERA GENOMIC PATHWAY	(M5946)HALLMARK COAGULATION; (M5905)HALLMARK ADIPOGENESIS; (M5921)HALLMARK COMPLEMENT	1	0	0	0	0	1	0	0	1	1	1	0	0	0	1	0	0	0	1	0
CACNG8	59283	symbol	H. sapiens	59283	H. sapiens	CACNG8	calcium voltage-gated channel auxiliary subunit gamma 8	GO:0098943 neurotransmitter receptor transport, postsynaptic endosome to lysosome;GO:0098953 receptor diffusion trapping;GO:0098970 postsynaptic neurotransmitter receptor diffusion trapping		Transporters:Accessory Factors Involved in Transport					0	0	0	0	0	0	0	0	0	0	0	0	0	0	0	0	0	0	0	0
CBWD5	220869	symbol	H. sapiens	220869	H. sapiens	CBWD5	COBW domain containing 5			Predicted intracellular proteins	Plasma membrane (Approved)				0	0	0	0	0	0	0	0	0	0	0	0	0	0	0	0	0	0	0	0
CDH18	1016	symbol	H. sapiens	1016	H. sapiens	CDH18	cadherin 18	GO:0016339 calcium-dependent cell-cell adhesion via plasma membrane cell adhesion molecules;GO:0034332 adherens junction organization;GO:0007043 cell-cell junction assembly		Predicted intracellular proteins					0	0	0	0	0	0	0	0	0	0	0	0	0	0	0	0	0	0	0	0
CLDN1	9076	symbol	H. sapiens	9076	H. sapiens	CLDN1	claudin 1	GO:0061772 xenobiotic transport across blood-nerve barrier;GO:1903544 response to butyrate;GO:1903545 cellular response to butyrate		Transporters:Transporter channels and pores; Potential drug targets; Disease related genes			(M72)PID NECTIN PATHWAY		0	0	1	0	0	1	0	1	0	0	0	1	0	0	0	1	0	0	0	1
COL4A2	1284	symbol	H. sapiens	1284	H. sapiens	COL4A2	collagen type IV alpha 2 chain	GO:0038063 collagen-activated tyrosine kinase receptor signaling pathway;GO:0038065 collagen-activated signaling pathway;GO:0035987 endodermal cell differentiation		Cancer-related genes:Candidate cancer biomarkers; Predicted intracellular proteins; Predicted secreted proteins; Disease related genes	Vesicles (Supported)		(M5887)NABA BASEMENT MEMBRANES; (M3005)NABA COLLAGENS; (M5884)NABA CORE MATRISOME	(M5909)HALLMARK MYOGENESIS; (M5921)HALLMARK COMPLEMENT; (M5930)HALLMARK EPITHELIAL MESENCHYMAL TRANSITION	0	0	0	0	0	1	1	1	0	0	1	0	1	0	0	0	0	0	0	0
CPEB2	132864	symbol	H. sapiens	132864	H. sapiens	CPEB2	cytoplasmic polyadenylation element binding protein 2	GO:1900248 negative regulation of cytoplasmic translational elongation;GO:0045900 negative regulation of translational elongation;GO:2000766 negative regulation of cytoplasmic translation		Predicted intracellular proteins	Cytosol (Approved)			(M5892)HALLMARK CHOLESTEROL HOMEOSTASIS	0	0	0	0	0	0	0	0	0	0	0	0	0	0	0	0	1	1	0	1
CXCL2	2920	symbol	H. sapiens	2920	H. sapiens	CXCL2	C-X-C motif chemokine ligand 2	GO:0061844 antimicrobial humoral immune response mediated by antimicrobial peptide;GO:0070098 chemokine-mediated signaling pathway;GO:1990868 response to chemokine		Cancer-related genes:Candidate cancer biomarkers; Predicted secreted proteins			(M7871)ST GRANULE CELL SURVIVAL PATHWAY; (M5883)NABA SECRETED FACTORS; (M5885)NABA MATRISOME ASSOCIATED	(M5941)HALLMARK UV RESPONSE UP; (M5890)HALLMARK TNFA SIGNALING VIA NFKB	1	0	0	0	0	1	0	0	1	0	0	0	0	0	0	0	0	0	0	0
CXCL8	3576	symbol	H. sapiens	3576	H. sapiens	CXCL8	C-X-C motif chemokine ligand 8	GO:2000535 regulation of entry of bacterium into host cell;GO:0035635 entry of bacterium into host cell;GO:0050930 induction of positive chemotaxis		Cancer-related genes:Candidate cancer biomarkers; Candidate cardiovascular disease genes; Predicted secreted proteins		ABT-510; MDX-018; Rivanicline; Tapinarof	(M251)PID SYNDECAN 3 PATHWAY; (M252)PID IL8 CXCR1 PATHWAY; (M240)PID SYNDECAN 2 PATHWAY	(M5930)HALLMARK EPITHELIAL MESENCHYMAL TRANSITION; (M5932)HALLMARK INFLAMMATORY RESPONSE	1	0	0	0	0	1	0	1	1	0	1	1	0	0	0	0	0	0	0	0
CYP1B1	1545	symbol	H. sapiens	1545	H. sapiens	CYP1B1	cytochrome P450 family 1 subfamily B member 1	GO:0002930 trabecular meshwork development;GO:0071603 endothelial cell-cell adhesion;GO:0061304 retinal blood vessel morphogenesis		Predicted intracellular proteins; Enzymes; ENZYME proteins:Oxidoreductases; Disease related genes; Potential drug targets	Mitochondria (Uncertain)	Genistein; 2-Methoxyestradiol; Naringenin; Quercetin; beta-Naphthoflavone; Flavone; Cannabidiol; Nabiximols			0	0	0	0	0	1	0	0	0	0	1	0	1	0	0	0	0	0	0	0
CYP20A1	57404	symbol	H. sapiens	57404	H. sapiens	CYP20A1	cytochrome P450 family 20 subfamily A member 1			Predicted intracellular proteins	Actin filaments;Cell Junctions;Plasma membrane (Uncertain); Additional: Nucleoplasm				0	0	0	0	0	0	0	0	0	0	0	0	0	0	0	0	0	0	0	0
DCUN1D3	123879	symbol	H. sapiens	123879	H. sapiens	DCUN1D3	defective in cullin neddylation 1 domain containing 3	GO:2000435 negative regulation of protein neddylation;GO:2000436 positive regulation of protein neddylation;GO:2000434 regulation of protein neddylation		Predicted intracellular proteins	Cytosol;Nucleoplasm (Approved)				0	0	0	0	0	0	0	0	0	0	0	0	0	0	0	0	0	0	0	0
DDHD1	80821	symbol	H. sapiens	80821	H. sapiens	DDHD1	DDHD domain containing 1	GO:0090141 positive regulation of mitochondrial fission;GO:0090140 regulation of mitochondrial fission;GO:0000266 mitochondrial fission		Predicted intracellular proteins; Disease related genes					0	0	0	0	0	0	0	0	0	0	0	0	0	0	0	0	0	0	0	0
DEPTOR	64798	symbol	H. sapiens	64798	H. sapiens	DEPTOR	DEP domain containing MTOR interacting protein	GO:1903940 negative regulation of TORC2 signaling;GO:1903939 regulation of TORC2 signaling;GO:0045792 negative regulation of cell size		Predicted intracellular proteins	Mitochondria (Supported); Additional: Nucleoplasm		(M121)PID MTOR 4PATHWAY; (M48)PID MET PATHWAY	(M5906)HALLMARK ESTROGEN RESPONSE EARLY	0	0	0	0	0	0	0	0	0	0	0	0	0	0	0	0	0	0	0	0
DLC1	10395	symbol	H. sapiens	10395	H. sapiens	DLC1	DLC1 Rho GTPase activating protein	GO:1900119 positive regulation of execution phase of apoptosis;GO:0051895 negative regulation of focal adhesion assembly;GO:0150118 negative regulation of cell-substrate junction organization		Cancer-related genes:Candidate cancer biomarkers; Predicted intracellular proteins	Golgi apparatus;Nucleoplasm;Vesicles (Approved)		(M68)PID RHOA REG PATHWAY	(M5942)HALLMARK UV RESPONSE DN; (M5906)HALLMARK ESTROGEN RESPONSE EARLY	1	0	0	1	0	0	0	0	0	0	1	0	0	0	0	0	0	0	0	0
DMD	1756	symbol	H. sapiens	1756	H. sapiens	DMD	dystrophin	GO:0014809 regulation of skeletal muscle contraction by regulation of release of sequestered calcium ion;GO:0014722 regulation of skeletal muscle contraction by calcium ion signaling;GO:1902083 negative regulation of peptidyl-cysteine S-nitrosylation		Transporters:Accessory Factors Involved in Transport; Predicted intracellular proteins; Disease related genes; Cancer-related genes:Mutational cancer driver genes; Potential drug targets		Golodirsen		(M5901)HALLMARK G2M CHECKPOINT; (M5909)HALLMARK MYOGENESIS	0	0	0	0	0	0	1	0	0	1	0	0	0	0	0	1	0	0	0	1
EFEMP1	2202	symbol	H. sapiens	2202	H. sapiens	EFEMP1	EGF containing fibulin extracellular matrix protein 1	GO:0048050 post-embryonic eye morphogenesis;GO:0048563 post-embryonic animal organ morphogenesis;GO:0009886 post-embryonic animal morphogenesis		Predicted intracellular proteins; Predicted secreted proteins; Disease related genes	Mitochondria (Supported)		(M3008)NABA ECM GLYCOPROTEINS; (M5884)NABA CORE MATRISOME; (M5889)NABA MATRISOME	(M5942)HALLMARK UV RESPONSE DN	0	0	1	0	0	0	1	0	0	0	0	0	0	0	0	0	0	0	0	0
ELN	2006	symbol	H. sapiens	2006	H. sapiens	ELN	elastin	GO:0003180 aortic valve morphogenesis;GO:0003176 aortic valve development;GO:1905314 semi-lunar valve development		Predicted secreted proteins; Disease related genes	Plasma membrane (Approved)	Rofecoxib	(M3008)NABA ECM GLYCOPROTEINS; (M5884)NABA CORE MATRISOME; (M5889)NABA MATRISOME	(M5930)HALLMARK EPITHELIAL MESENCHYMAL TRANSITION	0	0	0	0	0	1	1	0	0	0	0	0	1	0	0	0	0	0	0	0
EPGN	255324	symbol	H. sapiens	255324	H. sapiens	EPGN	epithelial mitogen	GO:0045741 positive regulation of epidermal growth factor-activated receptor activity;GO:0007176 regulation of epidermal growth factor-activated receptor activity;GO:0045742 positive regulation of epidermal growth factor receptor signaling pathway		Predicted intracellular proteins; Predicted secreted proteins	Cytosol;Nucleoplasm (Approved); Additional: Vesicles		(M5883)NABA SECRETED FACTORS; (M5885)NABA MATRISOME ASSOCIATED; (M5889)NABA MATRISOME		1	0	0	0	0	1	0	0	0	0	1	0	0	0	0	0	0	0	0	0
ERCC6	2074	symbol	H. sapiens	2074	H. sapiens	ERCC6	ERCC excision repair 6, chromatin remodeling factor	GO:0097680 double-strand break repair via classical nonhomologous end joining;GO:0006362 transcription elongation from RNA polymerase I promoter;GO:2001033 negative regulation of double-strand break repair via nonhomologous end joining		Cancer-related genes:Candidate cancer biomarkers; Predicted intracellular proteins; Disease related genes	Nucleoplasm (Approved); Additional: Nuclear bodies				1	0	1	1	0	0	0	0	0	0	0	0	0	0	0	0	0	0	0	0
EXOC8	149371	symbol	H. sapiens	149371	H. sapiens	EXOC8	exocyst complex component 8	GO:0006893 Golgi to plasma membrane transport;GO:0022617 extracellular matrix disassembly;GO:0007032 endosome organization		Transporters:Transporter channels and pores; Predicted intracellular proteins	Cytosol (Approved)				0	0	0	0	0	0	0	0	0	0	0	0	1	0	0	0	0	0	0	0
F2R	2149	symbol	H. sapiens	2149	H. sapiens	F2R	coagulation factor II thrombin receptor	GO:1900134 negative regulation of renin secretion into blood stream;GO:0007529 establishment of synaptic specificity at neuromuscular junction;GO:0099552 trans-synaptic signaling by lipid, modulating synaptic transmission		Predicted intracellular proteins; FDA approved drug targets:Small molecule drugs; G-protein coupled receptors:GPCRs excl olfactory receptors		Streptokinase; SR-123781A; Vorapaxar; Thrombin	(M238)PID THROMBIN PAR1 PATHWAY	(M5902)HALLMARK APOPTOSIS; (M5939)HALLMARK P53 PATHWAY; (M5950)HALLMARK ALLOGRAFT REJECTION	1	0	0	0	0	1	0	1	0	1	1	0	0	0	0	0	0	0	0	0
FAM45A	404636	gene_synonym	H. sapiens	404636	H. sapiens	DENND10	DENN domain containing 10	GO:2000641 regulation of early endosome to late endosome transport;GO:1903649 regulation of cytoplasmic transport;GO:0032509 endosome transport via multivesicular body sorting pathway		Predicted intracellular proteins	Centrosome;Cytosol;Plasma membrane (Approved)				0	0	0	0	0	0	0	0	0	0	0	0	0	0	0	0	0	0	0	0
FGD4	121512	symbol	H. sapiens	121512	H. sapiens	FGD4	FYVE, RhoGEF and PH domain containing 4	GO:0046847 filopodium assembly;GO:0008360 regulation of cell shape;GO:0051056 regulation of small GTPase mediated signal transduction		Predicted intracellular proteins; Disease related genes	Actin filaments (Approved)			(M5893)HALLMARK MITOTIC SPINDLE	1	0	0	0	0	0	0	0	0	0	0	0	0	0	0	0	0	0	0	0
FGL2	10875	symbol	H. sapiens	10875	H. sapiens	FGL2	fibrinogen like 2	GO:0002472 macrophage antigen processing and presentation;GO:0002616 regulation of macrophage antigen processing and presentation;GO:0002617 negative regulation of macrophage antigen processing and presentation		Predicted secreted proteins			(M3008)NABA ECM GLYCOPROTEINS; (M5884)NABA CORE MATRISOME; (M5889)NABA MATRISOME	(M5947)HALLMARK IL2 STAT5 SIGNALING; (M5913)HALLMARK INTERFERON GAMMA RESPONSE; (M5924)HALLMARK MTORC1 SIGNALING	0	0	1	0	0	0	1	0	0	0	0	0	0	0	0	0	0	0	0	0
FLJ42393	401105	symbol	H. sapiens	401105	H. sapiens	FLJ42393	uncharacterized LOC401105								0	0	0	0	0	0	0	0	0	0	0	0	0	0	0	0	0	0	0	0
FNDC3B	64778	symbol	H. sapiens	64778	H. sapiens	FNDC3B	fibronectin type III domain containing 3B			Predicted intracellular proteins	Endoplasmic reticulum (Approved)				0	0	0	0	0	0	0	0	0	0	0	0	0	0	0	0	0	0	0	0
FOS	2353	symbol	H. sapiens	2353	H. sapiens	FOS	Fos proto-oncogene, AP-1 transcription factor subunit	GO:0001661 conditioned taste aversion;GO:0009629 response to gravity;GO:0051412 response to corticosterone		Cancer-related genes:Candidate cancer biomarkers; Predicted intracellular proteins; Transcription factors:Basic domains	Nucleoplasm (Supported)	Nadroparin	(M134)PID TCR RAS PATHWAY; (M206)PID PDGFRA PATHWAY; (M268)PID S1P S1P2 PATHWAY	(M5941)HALLMARK UV RESPONSE UP; (M5890)HALLMARK TNFA SIGNALING VIA NFKB; (M5891)HALLMARK HYPOXIA	1	0	1	0	0	1	0	1	0	0	0	1	0	0	0	1	0	0	0	1
FOSB	2354	symbol	H. sapiens	2354	H. sapiens	FOSB	FosB proto-oncogene, AP-1 transcription factor subunit	GO:0051412 response to corticosterone;GO:0014072 response to isoquinoline alkaloid;GO:0043278 response to morphine		Predicted intracellular proteins; Transcription factors:Basic domains	Nucleoplasm (Supported); Additional: Vesicles		(M167)PID AP1 PATHWAY	(M5941)HALLMARK UV RESPONSE UP; (M5890)HALLMARK TNFA SIGNALING VIA NFKB	1	0	0	0	0	1	0	0	0	0	0	1	0	0	0	0	0	0	0	1
FZD4	8322	symbol	H. sapiens	8322	H. sapiens	FZD4	frizzled class receptor 4	GO:0061301 cerebellum vasculature morphogenesis;GO:0061300 cerebellum vasculature development;GO:0110135 Norrin signaling pathway		G-protein coupled receptors:Family fz/smo receptors; CD markers; Disease related genes; G-protein coupled receptors:GPCRs excl olfactory receptors; Potential drug targets	Plasma membrane (Approved); Additional: Nucleoplasm		(M77)PID WNT SIGNALING PATHWAY; (M5493)WNT SIGNALING	(M5905)HALLMARK ADIPOGENESIS	1	0	0	0	0	0	0	1	0	0	1	0	0	0	1	0	0	0	1	0
FZD9	8326	symbol	H. sapiens	8326	H. sapiens	FZD9	frizzled class receptor 9	GO:1903910 negative regulation of receptor clustering;GO:1904394 negative regulation of skeletal muscle acetylcholine-gated channel clustering;GO:1990523 bone regeneration		G-protein coupled receptors:Family fz/smo receptors; G-protein coupled receptors:GPCRs excl olfactory receptors; CD markers			(M77)PID WNT SIGNALING PATHWAY		0	0	0	1	0	0	0	1	0	0	0	0	0	0	0	1	0	0	0	0
GATA6	2627	symbol	H. sapiens	2627	H. sapiens	GATA6	GATA binding protein 6	GO:1904002 regulation of sebum secreting cell proliferation;GO:1904003 negative regulation of sebum secreting cell proliferation;GO:1990654 sebum secreting cell proliferation		Transcription factors:Zinc-coordinating DNA-binding domains; Disease related genes; Predicted intracellular proteins	Nucleoplasm (Supported)		(M288)PID HES HEY PATHWAY		1	0	0	0	0	0	1	0	1	0	1	0	0	1	0	1	0	1	1	1
GATSL2	729438	gene_synonym	H. sapiens	729438	H. sapiens	CASTOR2	cytosolic arginine sensor for mTORC1 subunit 2	GO:1903577 cellular response to L-arginine;GO:1903576 response to L-arginine;GO:1904262 negative regulation of TORC1 signaling		Predicted intracellular proteins					1	0	0	0	0	0	0	0	0	0	0	0	0	0	0	0	1	0	0	0
GNG10	2790	symbol	H. sapiens	2790	H. sapiens	GNG10	G protein subunit gamma 10	GO:0007186 G protein-coupled receptor signaling pathway;GO:0007165 signal transduction;GO:0023052 signaling		Predicted intracellular proteins; RAS pathway related proteins					1	0	0	0	0	0	0	1	0	1	0	0	0	0	0	0	0	0	0	0
GOLGA2P7	388152	symbol	H. sapiens	388152	H. sapiens	GOLGA2P7	GOLGA2 pseudogene 7								0	0	0	0	0	0	0	0	0	0	0	0	0	0	0	0	0	0	0	0
GSR	2936	symbol	H. sapiens	2936	H. sapiens	GSR	glutathione-disulfide reductase	GO:0045454 cell redox homeostasis;GO:0006749 glutathione metabolic process;GO:0098869 cellular oxidant detoxification		Cancer-related genes:Candidate cancer biomarkers; Predicted intracellular proteins; FDA approved drug targets:Small molecule drugs; Enzymes; ENZYME proteins:Oxidoreductases	Cytosol (Supported)	Glutathione; NADH; Carmustine; 3,6-dihydroxy-xanthene-9-propionic acid; 3-sulfino-L-alanine; Glutathionylspermidine disulfide; 3-(Prop-2-Ene-1-Sulfinyl)-Propene-1-Thiol; Flavin adenine dinucleotide; Glutathione disulfide; 3-nitro-L-tyrosine; 2-(2-PHENYL-3-PYRIDIN-2-YL-4,5,6,7-TETRAHYDRO-2H-ISOPHOSPHINDOL-1-YL)PYRIDINE; 6-(3-METHYL-1,4-DIOXO-1,4-DIHYDRONAPHTHALEN-2-YL)HEXANOIC ACID; Cannabidiol; C…		(M5938)HALLMARK REACTIVE OXYGEN SPECIES PATHWAY; (M5908)HALLMARK ANDROGEN RESPONSE; (M5902)HALLMARK APOPTOSIS	1	0	0	0	0	0	0	0	0	0	0	0	0	0	0	0	1	0	0	0
HECW2	57520	symbol	H. sapiens	57520	H. sapiens	HECW2	HECT, C2 and WW domain containing E3 ubiquitin protein ligase 2	GO:2000650 negative regulation of sodium ion transmembrane transporter activity;GO:1902306 negative regulation of sodium ion transmembrane transport;GO:0010766 negative regulation of sodium ion transport		ENZYME proteins:Transferases; Predicted intracellular proteins; Enzymes; Disease related genes; Potential drug targets					0	0	0	0	0	0	0	0	0	0	0	0	0	0	0	0	0	0	0	0
HGF	3082	symbol	H. sapiens	3082	H. sapiens	HGF	hepatocyte growth factor	GO:0060665 regulation of branching involved in salivary gland morphogenesis by mesenchymal-epithelial signaling;GO:0060638 mesenchymal-epithelial cell signaling;GO:0060693 regulation of branching involved in salivary gland morphogenesis		Cancer-related genes:Candidate cancer biomarkers; RAS pathway related proteins; Candidate cardiovascular disease genes; Predicted secreted proteins; Peptidases:Serine-type peptidases; Enzymes; Disease related genes; Cancer-related genes:Mutational cancer driver genes; Potential drug targets		Heparin; O2-Sulfo-Glucuronic Acid; N,O6-Disulfo-Glucosamine; ABT-510; Foretinib	(M86)PID ARF6 PATHWAY; (M232)PID ECADHERIN STABILIZATION PATHWAY; (M91)PID TCPTP PATHWAY	(M5902)HALLMARK APOPTOSIS	1	0	0	1	0	1	0	1	0	1	1	0	0	0	0	1	0	0	0	0
HIST1H1B	3009	gene_synonym	H. sapiens	3009	H. sapiens	H1-5	H1.5 linker histone, cluster member	GO:0071169 establishment of protein localization to chromatin;GO:0051574 positive regulation of histone H3-K9 methylation;GO:0031936 negative regulation of chromatin silencing		Predicted intracellular proteins	Nucleoplasm (Supported)				1	1	0	1	0	0	0	0	0	0	0	0	0	0	0	0	0	0	0	0
HIST1H1C	3006	gene_synonym	H. sapiens	3006	H. sapiens	H1-2	H1.2 linker histone, cluster member	GO:0098532 histone H3-K27 trimethylation;GO:0031936 negative regulation of chromatin silencing;GO:0016584 nucleosome positioning		Predicted intracellular proteins	Nucleoli rim;Nucleoplasm (Supported)			(M5939)HALLMARK P53 PATHWAY	1	1	0	1	0	0	0	0	0	0	0	0	0	0	0	0	0	0	0	0
HIST1H1D	3007	gene_synonym	H. sapiens	3007	H. sapiens	H1-3	H1.3 linker histone, cluster member	GO:0031936 negative regulation of chromatin silencing;GO:0016584 nucleosome positioning;GO:0031935 regulation of chromatin silencing		Predicted intracellular proteins					1	1	0	1	0	0	0	0	0	0	0	0	0	0	0	0	1	0	0	0
HIST1H1E	3008	gene_synonym	H. sapiens	3008	H. sapiens	H1-4	H1.4 linker histone, cluster member	GO:0031936 negative regulation of chromatin silencing;GO:0016584 nucleosome positioning;GO:0031935 regulation of chromatin silencing		Cancer-related genes:Mutated cancer genes; Predicted intracellular proteins; Disease related genes	Nuclear speckles (Supported)	Copper	(M32)PID HDAC CLASSIII PATHWAY		1	1	0	1	1	0	0	0	0	0	0	0	0	0	0	0	0	0	0	0
HIST1H2AC	8334	gene_synonym	H. sapiens	8334	H. sapiens	H2AC6	H2A clustered histone 6	GO:0006342 chromatin silencing;GO:0045814 negative regulation of gene expression, epigenetic;GO:0097549 chromatin organization involved in negative regulation of transcription		Cancer-related genes:Candidate cancer biomarkers; Predicted intracellular proteins	Nucleoplasm (Approved)				1	1	0	0	0	0	0	0	0	0	1	0	0	0	0	0	0	0	0	0
HIST1H2AE	3012	gene_synonym	H. sapiens	3012	H. sapiens	H2AC8	H2A clustered histone 8	GO:0006342 chromatin silencing;GO:0045814 negative regulation of gene expression, epigenetic;GO:0097549 chromatin organization involved in negative regulation of transcription		Predicted intracellular proteins	Nucleoplasm (Supported)				1	1	0	0	0	0	0	0	0	0	1	0	0	0	0	0	0	0	0	0
HIST1H2AG	8969	gene_synonym	H. sapiens	8969	H. sapiens	H2AC11	H2A clustered histone 11	GO:0006342 chromatin silencing;GO:0045814 negative regulation of gene expression, epigenetic;GO:0097549 chromatin organization involved in negative regulation of transcription		Predicted intracellular proteins	Nucleoplasm (Approved)				1	1	0	0	0	0	0	0	0	0	0	0	0	0	0	0	0	0	0	0
HIST1H2AH	85235	gene_synonym	H. sapiens	85235	H. sapiens	H2AC12	H2A clustered histone 12	GO:0006342 chromatin silencing;GO:0045814 negative regulation of gene expression, epigenetic;GO:0097549 chromatin organization involved in negative regulation of transcription		Predicted intracellular proteins	Nucleoplasm (Approved)				1	1	0	0	0	0	0	0	0	0	0	0	0	0	0	0	0	0	0	0
HIST1H2AI	8329	gene_synonym	H. sapiens	8329	H. sapiens	H2AC13	H2A clustered histone 13	GO:0006342 chromatin silencing;GO:0045814 negative regulation of gene expression, epigenetic;GO:0097549 chromatin organization involved in negative regulation of transcription		Predicted intracellular proteins	Nucleoplasm (Approved)				1	1	0	0	0	0	0	0	0	0	0	0	0	0	0	0	0	0	0	0
HIST1H2AK	8330	gene_synonym	H. sapiens	8330	H. sapiens	H2AC15	H2A clustered histone 15	GO:0006342 chromatin silencing;GO:0045814 negative regulation of gene expression, epigenetic;GO:0097549 chromatin organization involved in negative regulation of transcription		Predicted intracellular proteins	Nucleoplasm (Approved)				1	1	0	0	0	0	0	0	0	0	0	0	0	0	0	0	0	0	0	0
HIST1H2AL	8332	gene_synonym	H. sapiens	8332	H. sapiens	H2AC16	H2A clustered histone 16	GO:0006342 chromatin silencing;GO:0045814 negative regulation of gene expression, epigenetic;GO:0097549 chromatin organization involved in negative regulation of transcription		Predicted intracellular proteins	Nucleoplasm (Approved)				1	1	0	0	0	0	0	0	0	0	0	0	0	0	0	0	0	0	0	0
HIST1H2AM	8336	gene_synonym	H. sapiens	8336	H. sapiens	H2AC17	H2A clustered histone 17	GO:0006342 chromatin silencing;GO:0045814 negative regulation of gene expression, epigenetic;GO:0097549 chromatin organization involved in negative regulation of transcription		Predicted intracellular proteins	Nucleoplasm (Approved)				1	1	0	0	0	0	0	0	0	0	0	0	0	0	0	0	0	0	0	0
HIST1H2BC	3017	gene_synonym	H. sapiens	3017	H. sapiens	H2BC5	H2B clustered histone 5	GO:0006334 nucleosome assembly;GO:0034728 nucleosome organization;GO:0031497 chromatin assembly		Predicted intracellular proteins	Nucleoplasm (Approved); Additional: Cytosol				1	1	0	0	0	0	0	0	0	0	0	0	0	0	0	0	0	0	0	0
HIST1H2BD	3017	gene_synonym	H. sapiens	3017	H. sapiens	H2BC5	H2B clustered histone 5	GO:0006334 nucleosome assembly;GO:0034728 nucleosome organization;GO:0031497 chromatin assembly		Predicted intracellular proteins	Nucleoplasm (Approved); Additional: Cytosol				1	1	0	0	0	0	0	0	0	0	0	0	0	0	0	0	0	0	0	0
HIST1H2BF	3017	gene_synonym	H. sapiens	3017	H. sapiens	H2BC5	H2B clustered histone 5	GO:0006334 nucleosome assembly;GO:0034728 nucleosome organization;GO:0031497 chromatin assembly		Predicted intracellular proteins	Nucleoplasm (Approved); Additional: Cytosol				1	1	0	0	0	0	0	0	0	0	0	0	0	0	0	0	0	0	0	0
HIST1H2BG	3017	gene_synonym	H. sapiens	3017	H. sapiens	H2BC5	H2B clustered histone 5	GO:0006334 nucleosome assembly;GO:0034728 nucleosome organization;GO:0031497 chromatin assembly		Predicted intracellular proteins	Nucleoplasm (Approved); Additional: Cytosol				1	1	0	0	0	0	0	0	0	0	0	0	0	0	0	0	0	0	0	0
HIST1H2BH	8345	gene_synonym	H. sapiens	8345	H. sapiens	H2BC9	H2B clustered histone 9	GO:0006334 nucleosome assembly;GO:0034728 nucleosome organization;GO:0031497 chromatin assembly		Predicted intracellular proteins	Nucleoplasm (Approved); Additional: Cytosol				1	1	0	0	0	0	0	0	0	0	0	0	0	0	0	0	0	0	0	0
HIST1H2BI	3017	gene_synonym	H. sapiens	3017	H. sapiens	H2BC5	H2B clustered histone 5	GO:0006334 nucleosome assembly;GO:0034728 nucleosome organization;GO:0031497 chromatin assembly		Predicted intracellular proteins	Nucleoplasm (Approved); Additional: Cytosol				1	1	0	0	0	0	0	0	0	0	0	0	0	0	0	0	0	0	0	0
HIST1H2BJ	8970	gene_synonym	H. sapiens	8970	H. sapiens	H2BC11	H2B clustered histone 11	GO:0010804 negative regulation of tumor necrosis factor-mediated signaling pathway;GO:0002227 innate immune response in mucosa;GO:0002385 mucosal immune response		Predicted intracellular proteins	Nucleoplasm (Approved); Additional: Cytosol				1	1	0	0	0	1	0	0	1	0	0	0	0	0	0	0	0	0	0	0
HIST1H2BK	85236	gene_synonym	H. sapiens	85236	H. sapiens	H2BC12	H2B clustered histone 12	GO:0002227 innate immune response in mucosa;GO:0002385 mucosal immune response;GO:0002251 organ or tissue specific immune response		Predicted intracellular proteins	Nucleoplasm (Approved); Additional: Cytosol			(M5901)HALLMARK G2M CHECKPOINT	1	1	0	0	0	1	0	0	1	0	0	0	0	0	0	0	0	0	0	0
HIST1H2BM	8342	gene_synonym	H. sapiens	8342	H. sapiens	H2BC14	H2B clustered histone 14	GO:0006334 nucleosome assembly;GO:0034728 nucleosome organization;GO:0031497 chromatin assembly		Predicted intracellular proteins	Nucleoplasm (Approved); Additional: Cytosol				1	1	0	0	1	0	0	0	0	0	0	0	0	0	0	0	1	0	0	0
HIST1H2BN	8341	gene_synonym	H. sapiens	8341	H. sapiens	H2BC15	H2B clustered histone 15	GO:0006334 nucleosome assembly;GO:0034728 nucleosome organization;GO:0031497 chromatin assembly		Predicted intracellular proteins	Nucleoplasm (Approved); Additional: Cytosol				1	1	0	0	1	0	0	0	0	0	0	0	0	0	0	0	0	0	0	0
HIST1H2BO	8348	gene_synonym	H. sapiens	8348	H. sapiens	H2BC17	H2B clustered histone 17	GO:0006334 nucleosome assembly;GO:0034728 nucleosome organization;GO:0031497 chromatin assembly		Predicted intracellular proteins	Nucleoplasm (Approved); Additional: Cytosol				1	1	0	0	0	0	0	0	0	0	0	0	0	0	0	0	0	0	0	0
HIST1H3A	8350	gene_synonym	H. sapiens	8350	H. sapiens	H3C1	H3 clustered histone 1	GO:0006335 DNA replication-dependent nucleosome assembly;GO:0034723 DNA replication-dependent nucleosome organization;GO:0060968 regulation of gene silencing		Predicted intracellular proteins; Disease related genes					1	0	0	0	0	0	0	0	0	0	0	0	0	0	0	0	0	0	0	0
HIST1H3C	8352	gene_synonym	H. sapiens	8352	H. sapiens	H3C3	H3 clustered histone 3	GO:0006335 DNA replication-dependent nucleosome assembly;GO:0034723 DNA replication-dependent nucleosome organization;GO:0060968 regulation of gene silencing							1	0	0	0	0	0	0	0	0	0	0	0	0	0	0	0	0	0	0	0
HIST1H3D	8351	gene_synonym	H. sapiens	8351	H. sapiens	H3C4	H3 clustered histone 4	GO:0006335 DNA replication-dependent nucleosome assembly;GO:0034723 DNA replication-dependent nucleosome organization;GO:0060968 regulation of gene silencing		Predicted intracellular proteins; Disease related genes					1	0	0	0	1	0	0	0	0	0	0	0	0	0	0	0	0	0	0	0
HIST1H3E	8353	gene_synonym	H. sapiens	8353	H. sapiens	H3C6	H3 clustered histone 6	GO:0006335 DNA replication-dependent nucleosome assembly;GO:0034723 DNA replication-dependent nucleosome organization;GO:0060968 regulation of gene silencing		Predicted intracellular proteins; Disease related genes					1	0	0	0	0	0	0	0	0	0	0	0	0	0	0	0	0	0	0	0
HIST1H3F	8968	gene_synonym	H. sapiens	8968	H. sapiens	H3C7	H3 clustered histone 7	GO:0006335 DNA replication-dependent nucleosome assembly;GO:0034723 DNA replication-dependent nucleosome organization;GO:0060968 regulation of gene silencing		Predicted intracellular proteins; Disease related genes					1	0	0	0	0	0	0	0	0	0	0	0	0	0	0	0	0	0	0	0
HIST1H3G	8355	gene_synonym	H. sapiens	8355	H. sapiens	H3C8	H3 clustered histone 8	GO:0006335 DNA replication-dependent nucleosome assembly;GO:0034723 DNA replication-dependent nucleosome organization;GO:0060968 regulation of gene silencing		Predicted intracellular proteins; Disease related genes					1	0	0	0	0	0	0	0	0	0	0	0	0	0	0	0	0	0	0	0
HIST1H3H	8357	gene_synonym	H. sapiens	8357	H. sapiens	H3C10	H3 clustered histone 10	GO:0006335 DNA replication-dependent nucleosome assembly;GO:0034723 DNA replication-dependent nucleosome organization;GO:0060968 regulation of gene silencing		Predicted intracellular proteins; Disease related genes					1	0	0	0	0	0	0	0	0	0	0	0	0	0	0	0	0	0	0	0
HIST1H3I	8354	gene_synonym	H. sapiens	8354	H. sapiens	H3C11	H3 clustered histone 11	GO:0006335 DNA replication-dependent nucleosome assembly;GO:0034723 DNA replication-dependent nucleosome organization;GO:0060968 regulation of gene silencing		Predicted intracellular proteins; Disease related genes					1	0	0	0	0	0	0	0	0	0	0	0	0	0	0	0	0	0	0	0
HIST1H4B	8366	gene_synonym	H. sapiens	8366	H. sapiens	H4C2	H4 clustered histone 2	GO:0045653 negative regulation of megakaryocyte differentiation;GO:0006335 DNA replication-dependent nucleosome assembly;GO:0034723 DNA replication-dependent nucleosome organization		Predicted intracellular proteins; Disease related genes					1	0	1	0	0	0	0	0	0	0	0	0	0	0	0	0	0	0	0	0
HIST1H4D	8360	gene_synonym	H. sapiens	8360	H. sapiens	H4C4	H4 clustered histone 4	GO:0045653 negative regulation of megakaryocyte differentiation;GO:0006335 DNA replication-dependent nucleosome assembly;GO:0034723 DNA replication-dependent nucleosome organization		Predicted intracellular proteins; Disease related genes					1	0	1	0	0	0	0	0	0	0	0	0	0	0	0	0	0	0	0	0
HIST1H4E	8367	gene_synonym	H. sapiens	8367	H. sapiens	H4C5	H4 clustered histone 5	GO:0045653 negative regulation of megakaryocyte differentiation;GO:0006335 DNA replication-dependent nucleosome assembly;GO:0034723 DNA replication-dependent nucleosome organization		Cancer-related genes:Mutated cancer genes; Predicted intracellular proteins; Disease related genes					1	0	1	0	0	0	0	0	0	0	0	0	0	0	0	0	0	0	0	0
HIST1H4H	8365	gene_synonym	H. sapiens	8365	H. sapiens	H4C8	H4 clustered histone 8	GO:0045653 negative regulation of megakaryocyte differentiation;GO:0006335 DNA replication-dependent nucleosome assembly;GO:0034723 DNA replication-dependent nucleosome organization		Predicted intracellular proteins; Disease related genes					1	0	1	0	0	0	0	0	0	0	0	0	0	0	0	0	0	0	0	0
HIST1H4L	8368	gene_synonym	H. sapiens	8368	H. sapiens	H4C13	H4 clustered histone 13	GO:0045653 negative regulation of megakaryocyte differentiation;GO:0006335 DNA replication-dependent nucleosome assembly;GO:0034723 DNA replication-dependent nucleosome organization		Predicted intracellular proteins; Disease related genes					1	0	1	0	0	0	0	0	0	0	0	0	0	0	0	0	0	0	0	0
HIST2H2AB	317772	gene_synonym	H. sapiens	317772	H. sapiens	H2AC21	H2A clustered histone 21	GO:0006342 chromatin silencing;GO:0045814 negative regulation of gene expression, epigenetic;GO:0097549 chromatin organization involved in negative regulation of transcription		Predicted intracellular proteins	Nucleoplasm (Supported)				1	1	0	0	0	0	0	0	0	0	0	0	0	0	0	0	0	0	0	0
HIST2H2AC	8338	gene_synonym	H. sapiens	8338	H. sapiens	H2AC20	H2A clustered histone 20	GO:0006342 chromatin silencing;GO:0045814 negative regulation of gene expression, epigenetic;GO:0097549 chromatin organization involved in negative regulation of transcription		Predicted intracellular proteins	Nucleoplasm (Approved)				1	1	0	0	0	0	0	0	0	0	0	0	0	0	0	0	0	0	0	0
HIST2H2BE	8349	gene_synonym	H. sapiens	8349	H. sapiens	H2BC21	H2B clustered histone 21	GO:0002227 innate immune response in mucosa;GO:0002385 mucosal immune response;GO:0002251 organ or tissue specific immune response		Predicted intracellular proteins	Nucleoplasm (Approved); Additional: Cytosol				1	1	0	0	0	1	0	0	1	0	0	0	0	0	0	0	0	0	0	0
HIST2H2BF	440689	gene_synonym	H. sapiens	440689	H. sapiens	H2BC18	H2B clustered histone 18	GO:0006334 nucleosome assembly;GO:0034728 nucleosome organization;GO:0031497 chromatin assembly		Predicted intracellular proteins	Nucleoplasm (Approved); Additional: Cytosol				1	1	0	0	0	0	0	0	0	0	0	0	0	0	0	0	0	0	0	0
HIST2H3D	653604	gene_synonym	H. sapiens	653604	H. sapiens	H3C13	H3 clustered histone 13	GO:0006334 nucleosome assembly;GO:0034728 nucleosome organization;GO:0031497 chromatin assembly		Predicted intracellular proteins					1	0	0	0	0	0	0	0	0	0	0	0	0	0	0	0	0	0	0	0
HIST4H4	121504	gene_synonym	H. sapiens	121504	H. sapiens	H4-16	H4 histone 16	GO:0045653 negative regulation of megakaryocyte differentiation;GO:0006335 DNA replication-dependent nucleosome assembly;GO:0034723 DNA replication-dependent nucleosome organization		Predicted intracellular proteins; Disease related genes	Nucleoplasm (Supported)				1	0	1	0	0	0	0	0	0	0	0	0	0	0	0	0	0	0	0	0
HLA-A	3105	symbol	H. sapiens	3105	H. sapiens	HLA-A	major histocompatibility complex, class I, A	GO:0002485 antigen processing and presentation of endogenous peptide antigen via MHC class I via ER pathway, TAP-dependent;GO:2000567 regulation of memory T cell activation;GO:2000568 positive regulation of memory T cell activation		Cancer-related genes:Mutated cancer genes; Cancer-related genes:Mutational cancer driver genes; Predicted intracellular proteins	Plasma membrane (Supported); Additional: Golgi apparatus	3-Indolebutyric Acid; Nelipepimut-S; Coccidioides immitis spherule	(M88)PID CD8 TCR PATHWAY; (M54)PID IL12 2PATHWAY; (M272)PID CD8 TCR DOWNSTREAM PATHWAY	(M5913)HALLMARK INTERFERON GAMMA RESPONSE; (M5950)HALLMARK ALLOGRAFT REJECTION	1	0	0	0	0	1	0	0	1	0	1	1	0	0	0	0	0	0	0	0
HMX3	340784	symbol	H. sapiens	340784	H. sapiens	HMX3	H6 family homeobox 3	GO:0050885 neuromuscular process controlling balance;GO:0007566 embryo implantation;GO:0060135 maternal process involved in female pregnancy		Predicted intracellular proteins; Transcription factors:Helix-turn-helix domains	Nucleoplasm (Approved); Additional: Centriolar satellite				0	0	0	0	0	0	0	0	0	0	0	0	0	0	0	0	0	0	0	1
IER3	8870	symbol	H. sapiens	8870	H. sapiens	IER3	immediate early response 3	GO:2001020 regulation of response to DNA damage stimulus;GO:0080135 regulation of cellular response to stress;GO:0006974 cellular response to DNA damage stimulus		Predicted intracellular proteins				(M5902)HALLMARK APOPTOSIS; (M5890)HALLMARK TNFA SIGNALING VIA NFKB; (M5891)HALLMARK HYPOXIA	0	0	0	0	0	1	0	0	0	0	0	0	0	0	0	0	0	0	0	0
IFI27	3429	symbol	H. sapiens	3429	H. sapiens	IFI27	interferon alpha inducible protein 27	GO:0044827 modulation by host of viral genome replication;GO:0044788 modulation by host of viral process;GO:0046825 regulation of protein export from nucleus		Predicted intracellular proteins			(M295)SIG PIP3 SIGNALING IN CARDIAC MYOCTES	(M5911)HALLMARK INTERFERON ALPHA RESPONSE; (M5913)HALLMARK INTERFERON GAMMA RESPONSE	1	0	0	0	0	0	0	0	0	0	0	0	0	0	0	0	0	0	0	0
IGF2R	3482	symbol	H. sapiens	3482	H. sapiens	IGF2R	insulin like growth factor 2 receptor	GO:1904772 response to tetrachloromethane;GO:0044794 positive regulation by host of viral process;GO:0044788 modulation by host of viral process		Cancer-related genes:Candidate cancer biomarkers; Predicted intracellular proteins; Transporters; CD markers	Golgi apparatus;Vesicles (Enhanced)	Mecasermin; alpha-D-mannose 6-phosphate; Cerliponase alfa; Mecasermin rinfabate		(M5910)HALLMARK PROTEIN SECRETION; (M5902)HALLMARK APOPTOSIS; (M5947)HALLMARK IL2 STAT5 SIGNALING	0	0	0	0	0	0	0	0	0	0	0	0	0	0	0	1	0	0	1	0
IGFBP2	3485	symbol	H. sapiens	3485	H. sapiens	IGFBP2	insulin like growth factor binding protein 2	GO:0010226 response to lithium ion;GO:0043567 regulation of insulin-like growth factor receptor signaling pathway;GO:0042104 positive regulation of activated T cell proliferation		Cancer-related genes:Candidate cancer biomarkers; Predicted intracellular proteins; Predicted secreted proteins	Endoplasmic reticulum (Approved)		(M3008)NABA ECM GLYCOPROTEINS; (M5884)NABA CORE MATRISOME; (M5889)NABA MATRISOME	(M5941)HALLMARK UV RESPONSE UP; (M5930)HALLMARK EPITHELIAL MESENCHYMAL TRANSITION; (M5956)HALLMARK KRAS SIGNALING DN	0	0	0	0	0	1	1	0	0	0	0	0	0	0	0	0	0	0	1	1
IGFBP7	3490	symbol	H. sapiens	3490	H. sapiens	IGFBP7	insulin like growth factor binding protein 7	GO:0051414 response to cortisol;GO:0007566 embryo implantation;GO:0050810 regulation of steroid biosynthetic process		Predicted secreted proteins; Disease related genes	Golgi apparatus (Approved)	Insulin pork	(M3008)NABA ECM GLYCOPROTEINS; (M5884)NABA CORE MATRISOME; (M5889)NABA MATRISOME	(M5909)HALLMARK MYOGENESIS	1	0	0	0	0	0	1	1	0	0	1	0	0	0	0	0	0	0	1	1
IL17D	53342	symbol	H. sapiens	53342	H. sapiens	IL17D	interleukin 17D	GO:0032725 positive regulation of granulocyte macrophage colony-stimulating factor production;GO:0032604 granulocyte macrophage colony-stimulating factor production;GO:0032645 regulation of granulocyte macrophage colony-stimulating factor production		Predicted secreted proteins			(M5883)NABA SECRETED FACTORS; (M5885)NABA MATRISOME ASSOCIATED; (M5889)NABA MATRISOME		0	0	1	0	0	1	0	0	0	0	1	0	0	0	0	0	0	0	0	0
IL1B	3553	symbol	H. sapiens	3553	H. sapiens	IL1B	interleukin 1 beta	GO:1903597 negative regulation of gap junction assembly;GO:0035504 regulation of myosin light chain kinase activity;GO:0035505 positive regulation of myosin light chain kinase activity		Cancer-related genes:Candidate cancer biomarkers; Candidate cardiovascular disease genes; FDA approved drug targets:Biotech drugs; Predicted intracellular proteins; Predicted secreted proteins; FDA approved drug targets:Small molecule drugs; Transporters:Transporter channels and pores		Donepezil; Minocycline; VP025; Gallium nitrate; Talmapimod; Etiprednol dicloacetate; VX-702; VX-765; Andrographolide; Canakinumab; Rilonacept; Foreskin keratinocyte (neonatal); Binimetinib; Gevokizumab; Dilmapimod	(M11736)SA MMP CYTOKINE CONNECTION; (M267)PID ANTHRAX PATHWAY; (M36)PID IL27 PATHWAY	(M5897)HALLMARK IL6 JAK STAT3 SIGNALING; (M5902)HALLMARK APOPTOSIS; (M5890)HALLMARK TNFA SIGNALING VIA NFKB	1	0	1	1	0	1	0	1	1	1	1	0	0	0	1	0	0	0	0	1
IL6	3569	symbol	H. sapiens	3569	H. sapiens	IL6	interleukin 6	GO:0002384 hepatic immune response;GO:0032745 positive regulation of interleukin-21 production;GO:2000634 regulation of primary miRNA processing		Cancer-related genes:Candidate cancer biomarkers; Candidate cardiovascular disease genes; FDA approved drug targets:Biotech drugs; Predicted intracellular proteins; Predicted secreted proteins; Disease related genes	Vesicles (Approved)	Ginseng; YSIL6; VX-702; Atiprimod; CRx-139; Andrographolide; Tapinarof; Siltuximab; Polaprezinc; Foreskin fibroblast (neonatal); Foreskin keratinocyte (neonatal); Binimetinib; Dilmapimod	(M9174)ST STAT3 PATHWAY; (M36)PID IL27 PATHWAY; (M65)PID FRA PATHWAY	(M5897)HALLMARK IL6 JAK STAT3 SIGNALING; (M5941)HALLMARK UV RESPONSE UP; (M5902)HALLMARK APOPTOSIS	1	0	1	1	0	1	0	1	1	1	1	1	1	1	1	1	0	0	1	1
ITPR1	3708	symbol	H. sapiens	3708	H. sapiens	ITPR1	inositol 1,4,5-trisphosphate receptor type 1	GO:0050882 voluntary musculoskeletal movement;GO:0042045 epithelial fluid transport;GO:0099566 regulation of postsynaptic cytosolic calcium ion concentration		Transporters:Transporter channels and pores; Potential drug targets; Disease related genes	Vesicles (Approved)	Caffeine; 1D-myo-inositol 1,4,5-trisphosphate; Glycerin	(M16518)ST WNT CA2 CYCLIC GMP PATHWAY; (M7416)ST GAQ PATHWAY; (M2701)ST MYOCYTE AD PATHWAY		1	0	0	0	1	1	0	1	0	1	0	0	0	0	0	0	0	1	0	0
JAG1	182	symbol	H. sapiens	182	H. sapiens	JAG1	jagged canonical Notch ligand 1	GO:0061444 endocardial cushion cell development;GO:0061443 endocardial cushion cell differentiation;GO:0061073 ciliary body morphogenesis		Predicted intracellular proteins; Disease related genes; CD markers	Golgi apparatus;Plasma membrane (Approved)		(M256)PID TAP63 PATHWAY; (M17)PID NOTCH PATHWAY	(M5903)HALLMARK NOTCH SIGNALING; (M5944)HALLMARK ANGIOGENESIS; (M5895)HALLMARK WNT BETA CATENIN SIGNALING	1	0	1	0	0	1	0	0	0	0	1	1	0	0	0	0	0	0	0	0
JAG2	3714	symbol	H. sapiens	3714	H. sapiens	JAG2	jagged canonical Notch ligand 2	GO:1990134 epithelial cell apoptotic process involved in palatal shelf morphogenesis;GO:0009912 auditory receptor cell fate commitment;GO:0060120 inner ear receptor cell fate commitment			Vesicles (Supported); Additional: Cytosol		(M17)PID NOTCH PATHWAY; (M19)PID P73PATHWAY	(M5944)HALLMARK ANGIOGENESIS; (M5895)HALLMARK WNT BETA CATENIN SIGNALING; (M5939)HALLMARK P53 PATHWAY	1	0	0	0	0	0	0	0	0	0	0	0	0	0	0	0	0	0	0	0
KCNAB1	7881	symbol	H. sapiens	7881	H. sapiens	KCNAB1	potassium voltage-gated channel subfamily A regulatory beta subunit 1	GO:0060539 diaphragm development;GO:1902260 negative regulation of delayed rectifier potassium channel activity;GO:1903817 negative regulation of voltage-gated potassium channel activity		Predicted intracellular proteins; Transporters:Accessory Factors Involved in Transport	Vesicles (Approved); Additional: Nucleoplasm;Plasma membrane				0	0	0	0	0	0	0	0	0	0	0	0	0	0	0	0	0	0	0	0
KCNQ1OT1	10984	symbol	H. sapiens	10984	H. sapiens	KCNQ1OT1	KCNQ1 opposite strand/antisense transcript 1	GO:2000627 positive regulation of miRNA catabolic process;GO:2000625 regulation of miRNA catabolic process;GO:2000630 positive regulation of miRNA metabolic process							1	1	0	1	0	0	0	0	0	0	0	0	0	0	0	0	0	0	0	0
KCTD16	57528	symbol	H. sapiens	57528	H. sapiens	KCTD16	potassium channel tetramerization domain containing 16	GO:0008277 regulation of G protein-coupled receptor signaling pathway;GO:0051260 protein homooligomerization;GO:0051259 protein complex oligomerization		Predicted intracellular proteins	Nuclear speckles (Approved)				0	0	0	0	0	0	0	0	0	0	0	0	0	0	0	0	0	0	0	0
KLHL11	55175	symbol	H. sapiens	55175	H. sapiens	KLHL11	kelch like family member 11			Predicted intracellular proteins	Nucleoplasm (Approved); Additional: Nuclear membrane				0	0	0	0	0	0	0	0	0	0	0	0	0	0	0	0	0	0	0	0
KRT14	3861	symbol	H. sapiens	3861	H. sapiens	KRT14	keratin 14	GO:0045110 intermediate filament bundle assembly;GO:0045109 intermediate filament organization;GO:0045104 intermediate filament cytoskeleton organization		Cancer-related genes:Candidate cancer biomarkers; Predicted intracellular proteins; Disease related genes	Intermediate filaments (Enhanced)	Zinc; Zinc acetate	(M236)PID DELTA NP63 PATHWAY; (M115)PID REG GR PATHWAY		0	0	0	0	0	0	0	0	0	0	0	1	0	0	0	0	0	0	0	0
LAP3	51056	symbol	H. sapiens	51056	H. sapiens	LAP3	leucine aminopeptidase 3	GO:0006508 proteolysis;GO:0019538 protein metabolic process;GO:1901564 organonitrogen compound metabolic process		Predicted intracellular proteins; ENZYME proteins:Hydrolases; Enzymes; Peptidases:Metallopeptidases	Cytosol (Supported); Additional: Midbody;Nucleoplasm	Leucine Phosphonic Acid; (2S)-3-[(R)-[(1S)-1-amino-3-phenylpropyl](hydroxy)phosphoryl]-2-benzylpropanoic acid; Zofenoprilat		(M5911)HALLMARK INTERFERON ALPHA RESPONSE; (M5913)HALLMARK INTERFERON GAMMA RESPONSE; (M5921)HALLMARK COMPLEMENT	0	0	0	0	0	0	0	0	0	0	0	0	0	0	0	0	0	0	0	0
LDLRAD2	401944	symbol	H. sapiens	401944	H. sapiens	LDLRAD2	low density lipoprotein receptor class A domain containing 2			Predicted secreted proteins					0	0	0	0	0	0	0	0	0	0	0	0	0	0	0	0	0	0	0	0
LIF	3976	symbol	H. sapiens	3976	H. sapiens	LIF	LIF interleukin 6 family cytokine	GO:1901676 positive regulation of histone H3-K27 acetylation;GO:0043974 histone H3-K27 acetylation;GO:1901674 regulation of histone H3-K27 acetylation		Cancer-related genes:Candidate cancer biomarkers; Predicted intracellular proteins; Predicted secreted proteins	Cytosol (Supported)		(M65)PID FRA PATHWAY; (M145)PID P53 DOWNSTREAM PATHWAY; (M5883)NABA SECRETED FACTORS	(M5947)HALLMARK IL2 STAT5 SIGNALING; (M5890)HALLMARK TNFA SIGNALING VIA NFKB; (M5932)HALLMARK INFLAMMATORY RESPONSE	1	0	1	1	0	1	0	0	0	0	1	0	0	0	0	1	0	0	0	1
LINC00472	79940	symbol	H. sapiens	79940	H. sapiens	LINC00472	long intergenic non-protein coding RNA 472								0	0	0	0	0	0	0	0	0	0	0	0	0	0	0	0	0	0	0	0
LINC00657	647979	gene_synonym	H. sapiens	647979	H. sapiens	NORAD	non-coding RNA activated by DNA damage								0	0	0	0	0	0	0	0	0	0	0	0	0	0	0	0	0	0	0	0
LINC01197	400456	gene_synonym	H. sapiens	400456	H. sapiens	LETR1	lymphatic endothelial transcriptional regulator lncRNA 1								0	0	0	0	0	0	0	0	0	0	0	0	0	0	0	0	0	0	0	0
LOC100133091	100133091	Gene_ID	H. sapiens	100133091	H. sapiens	LOC100133091	uncharacterized LOC100133091								0	0	0	0	0	0	0	0	0	0	0	0	0	0	0	0	0	0	0	0
LOC100289511	100289511	Gene_ID	H. sapiens	100289511	H. sapiens	LOC100289511	uncharacterized LOC100289511								0	0	0	0	0	0	0	0	0	0	0	0	0	0	0	0	0	0	0	0
LOC100499194	100499194	Gene_ID	H. sapiens	100499194	H. sapiens	LOC100499194	uncharacterized LOC100499194								0	0	0	0	0	0	0	0	0	0	0	0	0	0	0	0	0	0	0	0
LOC101929147	101929147	Gene_ID	H. sapiens	101929147	H. sapiens	WARS2-AS1	WARS2 antisense RNA 1								0	0	0	0	0	0	0	0	0	0	0	0	0	0	0	0	0	0	0	0
LOC221946	221946	Gene_ID	H. sapiens	221946	H. sapiens	LOC221946	uncharacterized LOC221946								0	0	0	0	0	0	0	0	0	0	0	0	0	0	0	0	0	0	0	0
LOC339059	339059	Gene_ID	H. sapiens	339059	H. sapiens	LOC339059	uncharacterized LOC339059								0	0	0	0	0	0	0	0	0	0	0	0	0	0	0	0	0	0	0	0
LOC439994	439994	Gene_ID	H. sapiens	439994	H. sapiens	LINC00863	long intergenic non-protein coding RNA 863								0	0	0	0	0	0	0	0	0	0	0	0	0	0	0	0	0	0	0	0
LSM12	124801	symbol	H. sapiens	124801	H. sapiens	LSM12	LSM12 homolog			Predicted intracellular proteins	Cytosol (Approved)				0	0	0	0	0	0	0	0	0	0	0	0	0	0	0	0	0	0	0	0
MAP3K1	4214	symbol	H. sapiens	4214	H. sapiens	MAP3K1	mitogen-activated protein kinase kinase kinase 1	GO:0038095 Fc-epsilon receptor signaling pathway;GO:0038093 Fc receptor signaling pathway;GO:0071260 cellular response to mechanical stimulus	STE Ser/Thr protein kinase family	ENZYME proteins:Transferases; Cancer-related genes:Mutated cancer genes; Enzymes; Disease related genes; Cancer-related genes:Mutational cancer driver genes; Kinases:STE Ser/Thr protein kinases; Potential drug targets	Cytosol (Approved)	AZD-8330; Binimetinib; Fostamatinib	(M190)PID TCR JNK PATHWAY; (M228)PID SMAD2 3PATHWAY; (M17200)SA B CELL RECEPTOR COMPLEXES	(M5891)HALLMARK HYPOXIA; (M5953)HALLMARK KRAS SIGNALING UP	0	0	0	0	0	1	0	0	0	0	0	0	0	0	0	0	0	0	0	1
MDM2	4193	symbol	H. sapiens	4193	H. sapiens	MDM2	MDM2 proto-oncogene	GO:0071301 cellular response to vitamin B1;GO:1904404 response to formaldehyde;GO:0010266 response to vitamin B1		Cancer-related genes:Candidate cancer biomarkers; ENZYME proteins:Transferases; Predicted intracellular proteins; Enzymes; Disease related genes; Potential drug targets	Nucleoplasm (Supported)	Zinc; Cis-[4,5-Bis-(4-Bromophenyl)-2-(2-Ethoxy-4-Methoxyphenyl)-4,5-Dihydroimidazol-1-Yl]-[4-(2-Hydroxyethyl)Piperazin-1-Yl]Methanone; Cis-[4,5-Bis-(4-Chlorophenyl)-2-(2-Isopropoxy-4-Methoxyphenyl)-4,5-Dihyd Roimidazol-1-Yl]-Piperazin-1-Yl-Methanone; Zinc acetate; Zinc chloride; Zinc sulfate, unspecified form	(M140)PID RANBP2 PATHWAY; (M1529)SA G1 AND S PHASES; (M242)PID AURORA A PATHWAY	(M5939)HALLMARK P53 PATHWAY	1	1	1	1	1	1	0	1	0	0	1	1	0	0	0	0	0	1	0	1
MEDAG	84935	symbol	H. sapiens	84935	H. sapiens	MEDAG	mesenteric estrogen dependent adipogenesis	GO:0045600 positive regulation of fat cell differentiation;GO:0045598 regulation of fat cell differentiation;GO:0045444 fat cell differentiation		Predicted intracellular proteins					0	0	0	0	0	0	0	0	0	0	0	0	0	0	0	0	0	0	0	0
MEST	4232	symbol	H. sapiens	4232	H. sapiens	MEST	mesoderm specific transcript	GO:0010883 regulation of lipid storage;GO:0019915 lipid storage;GO:0007498 mesoderm development		Predicted intracellular proteins	Cytosol;Golgi apparatus (Approved)			(M5907)HALLMARK ESTROGEN RESPONSE LATE; (M5930)HALLMARK EPITHELIAL MESENCHYMAL TRANSITION	0	0	0	0	0	0	0	0	0	1	0	0	0	0	1	0	0	0	0	0
MIR663AHG	284801	symbol	H. sapiens	284801	H. sapiens	MIR663AHG	MIR663A host gene								0	0	0	0	0	0	0	0	0	0	0	0	0	0	0	0	0	0	0	0
MOB4	25843	symbol	H. sapiens	25843	H. sapiens	MOB4	MOB family member 4, phocein			Predicted intracellular proteins					0	0	0	0	0	0	0	0	0	0	0	0	0	0	0	0	0	0	0	0
MXD1	4084	symbol	H. sapiens	4084	H. sapiens	MXD1	MAX dimerization protein 1	GO:0000122 negative regulation of transcription by RNA polymerase II;GO:0045892 negative regulation of transcription, DNA-templated;GO:1903507 negative regulation of nucleic acid-templated transcription		Predicted intracellular proteins; Transcription factors:Basic domains	Mitochondria;Nucleoplasm (Uncertain); Additional: Cytosol		(M101)PID HDAC CLASSI PATHWAY; (M105)PID TELOMERASE PATHWAY	(M5947)HALLMARK IL2 STAT5 SIGNALING; (M5890)HALLMARK TNFA SIGNALING VIA NFKB; (M5932)HALLMARK INFLAMMATORY RESPONSE	0	0	0	0	0	0	0	0	0	0	0	0	0	0	0	0	0	0	0	0
MYO1E	4643	symbol	H. sapiens	4643	H. sapiens	MYO1E	myosin IE	GO:0035166 post-embryonic hemopoiesis;GO:0032836 glomerular basement membrane development;GO:0072015 glomerular visceral epithelial cell development		Predicted intracellular proteins; Disease related genes	Nucleoplasm;Plasma membrane (Approved); Additional: Cytosol	Imidazole		(M5893)HALLMARK MITOTIC SPINDLE; (M5947)HALLMARK IL2 STAT5 SIGNALING	0	0	0	0	0	0	0	0	0	0	1	0	1	0	0	0	0	0	0	0
NCKAP5	344148	symbol	H. sapiens	344148	H. sapiens	NCKAP5	NCK associated protein 5	GO:0007019 microtubule depolymerization;GO:0001578 microtubule bundle formation;GO:0051261 protein depolymerization		Predicted intracellular proteins	Nucleoli (Approved); Additional: Cytosol;Golgi apparatus;Plasma membrane				0	0	0	0	0	0	0	0	0	0	0	0	0	0	0	0	0	0	0	0
NKD2	85409	symbol	H. sapiens	85409	H. sapiens	NKD2	NKD inhibitor of WNT signaling pathway 2	GO:0048210 Golgi vesicle fusion to target membrane;GO:0010954 positive regulation of protein processing;GO:1903319 positive regulation of protein maturation		Predicted intracellular proteins			(M90)PID WNT CANONICAL PATHWAY; (M17761)ST WNT BETA CATENIN PATHWAY		0	0	0	0	0	0	0	0	0	0	0	0	0	0	0	0	0	0	0	0
NOCT	25819	symbol	H. sapiens	25819	H. sapiens	NOCT	nocturnin	GO:0000290 deadenylation-dependent decapping of nuclear-transcribed mRNA;GO:0110156 methylguanosine-cap decapping;GO:0110154 RNA decapping		Predicted intracellular proteins; ENZYME proteins:Hydrolases; Enzymes	Nuclear bodies (Supported); Additional: Cytosol;Nucleoplasm			(M5891)HALLMARK HYPOXIA	0	0	1	0	0	1	0	0	0	0	0	0	0	0	0	0	0	0	0	0
NOTCH2NL	388677	gene_synonym	H. sapiens	388677	H. sapiens	NOTCH2NLA	notch 2 N-terminal like A	GO:0045747 positive regulation of Notch signaling pathway;GO:0008593 regulation of Notch signaling pathway;GO:0021987 cerebral cortex development		Predicted intracellular proteins; Predicted secreted proteins					0	0	0	0	0	0	0	0	0	0	0	0	0	0	0	0	0	0	0	0
NR3C2	4306	symbol	H. sapiens	4306	H. sapiens	NR3C2	nuclear receptor subfamily 3 group C member 2	GO:1901224 positive regulation of NIK/NF-kappaB signaling;GO:1901222 regulation of NIK/NF-kappaB signaling;GO:0030518 intracellular steroid hormone receptor signaling pathway		Transcription factors:Zinc-coordinating DNA-binding domains; Predicted intracellular proteins; FDA approved drug targets:Small molecule drugs; Disease related genes; Nuclear receptors	Nucleoplasm (Supported)	Nimodipine; Progesterone; Spironolactone; Fluticasone propionate; Testosterone; Fludrocortisone; Eplerenone; Clobetasol propionate; Felodipine; Desoxycorticosterone pivalate; Drospirenone; Stanolone; Metribolone; Aldosterone; Corticosterone; Desoxycorticosterone acetate; Fluticasone furoate; Fluticasone; Testosterone cypionate; Testosterone enanthate; Testosterone undecanoate; Stanolone acetate		(M5948)HALLMARK BILE ACID METABOLISM	1	0	1	0	0	0	0	0	0	0	0	0	0	0	0	0	0	0	0	1
NSUN5P1	155400	symbol	H. sapiens	155400	H. sapiens	NSUN5P1	NSUN5 pseudogene 1	GO:0070475 rRNA base methylation;GO:0031167 rRNA methylation;GO:0000154 rRNA modification							0	0	0	0	0	0	0	0	0	0	0	0	0	0	0	0	0	0	0	0
NTN4	59277	symbol	H. sapiens	59277	H. sapiens	NTN4	netrin 4	GO:0060668 regulation of branching involved in salivary gland morphogenesis by extracellular matrix-epithelial cell signaling;GO:0035426 extracellular matrix-cell signaling;GO:0060693 regulation of branching involved in salivary gland morphogenesis		Cancer-related genes:Mutated cancer genes; Predicted intracellular proteins; Predicted secreted proteins			(M5887)NABA BASEMENT MEMBRANES; (M3008)NABA ECM GLYCOPROTEINS; (M5884)NABA CORE MATRISOME		0	0	0	0	0	0	1	0	0	0	0	0	1	0	0	0	0	0	0	0
NUTM2D	728130	symbol	H. sapiens	728130	H. sapiens	NUTM2D	NUT family member 2D			Predicted intracellular proteins	Nuclear bodies (Approved)				0	0	0	0	0	0	0	0	0	0	0	0	0	0	0	0	0	0	0	0
OPN3	23596	symbol	H. sapiens	23596	H. sapiens	OPN3	opsin 3	GO:0048022 negative regulation of melanin biosynthetic process;GO:1900377 negative regulation of secondary metabolite biosynthetic process;GO:0009637 response to blue light		G-protein coupled receptors:GPCRs excl olfactory receptors; G-protein coupled receptors:Opsins	Nucleoplasm (Approved)			(M5906)HALLMARK ESTROGEN RESPONSE EARLY; (M5907)HALLMARK ESTROGEN RESPONSE LATE	0	0	0	0	0	0	0	0	0	0	0	0	0	0	0	0	0	0	0	0
OSBP2	23762	symbol	H. sapiens	23762	H. sapiens	OSBP2	oxysterol binding protein 2	GO:0015918 sterol transport;GO:0007286 spermatid development;GO:0048515 spermatid differentiation		Predicted intracellular proteins	Cytosol (Approved)			(M5945)HALLMARK HEME METABOLISM	0	0	0	0	0	0	0	0	0	0	0	0	0	0	1	0	0	0	0	0
PAG1	55824	symbol	H. sapiens	55824	H. sapiens	PAG1	phosphoprotein membrane anchor with glycosphingolipid microdomains 1	GO:0050868 negative regulation of T cell activation;GO:1903038 negative regulation of leukocyte cell-cell adhesion;GO:0051250 negative regulation of lymphocyte activation		Predicted intracellular proteins	Plasma membrane;Vesicles (Supported)		(M3501)ST B CELL ANTIGEN RECEPTOR; (M9526)ST T CELL SIGNAL TRANSDUCTION; (M88)PID CD8 TCR PATHWAY		0	0	0	0	0	0	0	0	0	0	0	0	0	0	0	0	0	0	0	0
PAPPA2	60676	symbol	H. sapiens	60676	H. sapiens	PAPPA2	pappalysin 2	GO:0009651 response to salt stress;GO:0006970 response to osmotic stress;GO:0060349 bone morphogenesis		Predicted secreted proteins; Enzymes; Peptidases:Metallopeptidases	Endoplasmic reticulum;Vesicles (Approved)		(M3468)NABA ECM REGULATORS; (M5885)NABA MATRISOME ASSOCIATED; (M5889)NABA MATRISOME		0	0	0	0	0	0	0	0	0	0	0	0	0	0	0	0	0	0	1	0
PCGF5	84333	symbol	H. sapiens	84333	H. sapiens	PCGF5	polycomb group ring finger 5	GO:0060819 inactivation of X chromosome by genetic imprinting;GO:0036353 histone H2A-K119 monoubiquitination;GO:0006349 regulation of gene expression by genetic imprinting		Predicted intracellular proteins	Nucleoplasm (Supported); Additional: Golgi apparatus			(M5893)HALLMARK MITOTIC SPINDLE	1	1	0	0	0	0	0	0	0	0	0	0	0	0	0	0	0	0	0	0
PDE3A	5139	symbol	H. sapiens	5139	H. sapiens	PDE3A	phosphodiesterase 3A	GO:0060282 positive regulation of oocyte development;GO:0060281 regulation of oocyte development;GO:1905879 regulation of oogenesis		FDA approved drug targets:Small molecule drugs; ENZYME proteins:Hydrolases; Enzymes; Disease related genes	Plasma membrane (Approved)	Milrinone; Anagrelide; Theophylline; Levosimendan; Cilostazol; Aminophylline; Oxtriphylline; Amrinone; Enoximone; Ibudilast; Tofisopam			0	0	0	0	0	0	0	0	0	0	0	0	0	0	0	0	0	0	0	1
PDE5A	8654	symbol	H. sapiens	8654	H. sapiens	PDE5A	phosphodiesterase 5A	GO:0046069 cGMP catabolic process;GO:0009214 cyclic nucleotide catabolic process;GO:0046068 cGMP metabolic process		Predicted intracellular proteins; FDA approved drug targets:Small molecule drugs; ENZYME proteins:Hydrolases; Enzymes	Cytosol (Approved)	Sildenafil; Theophylline; Tadalafil; Vardenafil; Dipyridamole; Guanosine-5'-Monophosphate; gamma-Glutamyl[S-(2-iodobenzyl)cysteinyl]glycine; OSI-461; Avanafil; Exisulind; Udenafil; 3-isobutyl-1-methyl-7H-xanthine; 5-ethoxy-4-(1-methyl-7-oxo-3-propyl-6,7-dihydro-1H-pyrazolo[4,3-d]pyrimidin-5-yl)thiophene-2-sulfonamide; Fostamatinib			1	0	0	0	0	0	0	0	0	0	0	0	0	0	0	0	0	0	0	0
PDLIM5	10611	symbol	H. sapiens	10611	H. sapiens	PDLIM5	PDZ and LIM domain 5	GO:0003298 physiological muscle hypertrophy;GO:0003301 physiological cardiac muscle hypertrophy;GO:0061049 cell growth involved in cardiac muscle cell development		Predicted intracellular proteins	Focal adhesion sites;Nucleoplasm;Plasma membrane (Supported)			(M5908)HALLMARK ANDROGEN RESPONSE; (M5942)HALLMARK UV RESPONSE DN; (M5893)HALLMARK MITOTIC SPINDLE	0	0	0	0	0	0	0	0	0	0	0	0	0	1	0	0	0	0	0	0
PHACTR2	9749	symbol	H. sapiens	9749	H. sapiens	PHACTR2	phosphatase and actin regulator 2	GO:0030036 actin cytoskeleton organization;GO:0043086 negative regulation of catalytic activity;GO:0030029 actin filament-based process		Predicted intracellular proteins					1	0	0	0	0	0	0	0	0	1	0	0	0	0	0	0	0	0	0	0
PKD1L2	114780	symbol	H. sapiens	114780	H. sapiens	PKD1L2	polycystin 1 like 2 (gene/pseudogene)	GO:0050982 detection of mechanical stimulus;GO:0009581 detection of external stimulus;GO:0009582 detection of abiotic stimulus							0	0	0	0	0	0	0	0	0	0	0	0	0	0	0	0	0	0	0	1
PLAC9	219348	symbol	H. sapiens	219348	H. sapiens	PLAC9	placenta associated 9			Predicted intracellular proteins; Predicted secreted proteins					0	0	0	0	0	0	0	0	0	0	0	0	0	0	0	0	0	0	0	0
PNRC1	10957	symbol	H. sapiens	10957	H. sapiens	PNRC1	proline rich nuclear receptor coactivator 1			Predicted intracellular proteins	Nucleoli;Nucleoplasm (Approved)			(M5892)HALLMARK CHOLESTEROL HOMEOSTASIS; (M5890)HALLMARK TNFA SIGNALING VIA NFKB; (M5891)HALLMARK HYPOXIA	0	0	0	0	0	0	0	0	0	0	0	0	0	0	0	0	0	0	0	0
PRDM16	63976	symbol	H. sapiens	63976	H. sapiens	PRDM16	PR/SET domain 16	GO:0051567 histone H3-K9 methylation;GO:0043457 regulation of cellular respiration;GO:0050873 brown fat cell differentiation		Cancer-related genes:Candidate cancer biomarkers; Transcription factors:Zinc-coordinating DNA-binding domains; Disease related genes; Predicted intracellular proteins	Nucleoplasm (Supported)				1	0	0	0	0	0	0	0	0	0	0	0	0	0	0	0	0	0	0	0
PRTG	283659	symbol	H. sapiens	283659	H. sapiens	PRTG	protogenin	GO:0050768 negative regulation of neurogenesis;GO:0051961 negative regulation of nervous system development;GO:0010721 negative regulation of cell development		Predicted intracellular proteins	Cytosol (Approved); Additional: Plasma membrane;Vesicles				0	0	1	0	0	0	0	0	0	0	0	0	0	0	0	0	0	0	0	0
PTCD1	26024	symbol	H. sapiens	26024	H. sapiens	PTCD1	pentatricopeptide repeat domain 1	GO:0042780 tRNA 3'-end processing;GO:0043628 ncRNA 3'-end processing;GO:0031123 RNA 3'-end processing		Predicted intracellular proteins	Mitochondria (Approved)				0	0	0	0	0	0	0	0	0	0	0	0	0	0	0	0	0	0	0	0
PTEN	5728	symbol	H. sapiens	5728	H. sapiens	PTEN	phosphatase and tensin homolog	GO:2000808 negative regulation of synaptic vesicle clustering;GO:0051548 negative regulation of keratinocyte migration;GO:1903984 positive regulation of TRAIL-activated apoptotic signaling pathway		Cancer-related genes:Mutated cancer genes; Predicted intracellular proteins; Predicted secreted proteins; ENZYME proteins:Hydrolases; Enzymes; Disease related genes; Cancer-related genes:Mutational cancer driver genes; Potential drug targets	Nucleoplasm (Supported); Additional: Cytosol	Phosphatidylethanolamine	(M12771)SA PTEN PATHWAY; (M1315)SIG PIP3 SIGNALING IN B LYMPHOCYTES; (M14532)ST PHOSPHOINOSITIDE 3 KINASE PATHWAY	(M5923)HALLMARK PI3K AKT MTOR SIGNALING; (M5942)HALLMARK UV RESPONSE DN; (M5915)HALLMARK APICAL JUNCTION	0	1	1	1	0	1	0	1	0	0	1	1	0	1	0	1	0	1	0	1
PTGER4	5734	symbol	H. sapiens	5734	H. sapiens	PTGER4	prostaglandin E receptor 4	GO:0072682 eosinophil extravasation;GO:2000419 regulation of eosinophil extravasation;GO:2000420 negative regulation of eosinophil extravasation		FDA approved drug targets:Small molecule drugs; G-protein coupled receptors:GPCRs excl olfactory receptors		Dinoprostone; Misoprostol; Limaprost; Castor oil; Grapiprant		(M5890)HALLMARK TNFA SIGNALING VIA NFKB; (M5932)HALLMARK INFLAMMATORY RESPONSE	0	0	0	1	1	1	0	1	0	0	1	0	0	0	0	0	0	0	0	1
PTGIS	5740	symbol	H. sapiens	5740	H. sapiens	PTGIS	prostaglandin I2 synthase	GO:1900119 positive regulation of execution phase of apoptosis;GO:0035360 positive regulation of peroxisome proliferator activated receptor signaling pathway;GO:0019371 cyclooxygenase pathway		FDA approved drug targets:Small molecule drugs; ENZYME proteins:Isomerase; Enzymes; Disease related genes	Endoplasmic reticulum (Approved)	Phenylbutazone; Epoprostenol; (5Z)-7-{(1R,4S,5R,6R)-6-[(1E)-1-Octen-1-yl]-2,3-diazabicyclo[2.2.1]hept-2-en-5-yl}-5-heptenoic acid		(M5909)HALLMARK MYOGENESIS	0	0	0	0	0	1	0	0	0	0	1	0	0	0	0	0	0	1	0	0
PTX3	5806	symbol	H. sapiens	5806	H. sapiens	PTX3	pentraxin 3	GO:0044866 modulation by host of viral exo-alpha-sialidase activity;GO:0044867 modulation by host of viral catalytic activity;GO:0044869 negative regulation by host of viral exo-alpha-sialidase activity		Predicted secreted proteins	Plasma membrane (Approved)		(M2701)ST MYOCYTE AD PATHWAY; (M19043)ST ADRENERGIC	(M5890)HALLMARK TNFA SIGNALING VIA NFKB; (M5930)HALLMARK EPITHELIAL MESENCHYMAL TRANSITION	0	0	0	0	0	1	0	0	0	0	1	0	1	0	0	0	0	0	0	0
RAPH1	65059	symbol	H. sapiens	65059	H. sapiens	RAPH1	Ras association (RalGDS/AF-6) and pleckstrin homology domains 1	GO:0048675 axon extension;GO:1990138 neuron projection extension;GO:0048588 developmental cell growth		Predicted intracellular proteins	Nuclear bodies;Plasma membrane (Approved); Additional: Cytosol				0	0	0	0	0	0	0	0	0	0	0	0	0	0	0	0	0	0	0	0
RBM4	5936	symbol	H. sapiens	5936	H. sapiens	RBM4	RNA binding motif protein 4	GO:0002192 IRES-dependent translational initiation of linear mRNA;GO:0110017 cap-independent translational initiation of linear mRNA;GO:0032055 negative regulation of translation in response to stress		Predicted intracellular proteins	Nucleoplasm (Approved); Additional: Cytosol			(M5953)HALLMARK KRAS SIGNALING UP	1	0	0	0	0	0	0	0	0	0	0	0	0	0	0	0	1	0	0	0
RBMS2	5939	symbol	H. sapiens	5939	H. sapiens	RBMS2	RNA binding motif single stranded interacting protein 2	GO:0006396 RNA processing;GO:0016070 RNA metabolic process;GO:0090304 nucleic acid metabolic process		Predicted intracellular proteins	Nucleoli fibrillar center (Approved); Additional: Cytosol;Nucleoplasm				0	0	0	0	0	0	0	0	0	0	0	0	0	0	0	0	0	0	0	0
RC3H1	149041	symbol	H. sapiens	149041	H. sapiens	RC3H1	ring finger and CCCH-type domains 1	GO:0002635 negative regulation of germinal center formation;GO:0061470 T follicular helper cell differentiation;GO:0002634 regulation of germinal center formation		Predicted intracellular proteins	Cytosol (Supported); Additional: Golgi apparatus;Plasma membrane				0	0	1	0	0	1	0	0	0	0	1	0	0	0	0	0	0	0	0	0
RGS11	8786	symbol	H. sapiens	8786	H. sapiens	RGS11	regulator of G protein signaling 11	GO:0008277 regulation of G protein-coupled receptor signaling pathway;GO:0009968 negative regulation of signal transduction;GO:0007186 G protein-coupled receptor signaling pathway		Predicted intracellular proteins				(M5956)HALLMARK KRAS SIGNALING DN	0	0	0	0	0	1	0	0	0	0	0	0	0	0	0	0	0	0	0	0
RGS5	8490	symbol	H. sapiens	8490	H. sapiens	RGS5	regulator of G protein signaling 5	GO:0008277 regulation of G protein-coupled receptor signaling pathway;GO:0009968 negative regulation of signal transduction;GO:0007186 G protein-coupled receptor signaling pathway		Predicted intracellular proteins					0	0	0	0	0	1	0	0	0	0	0	0	0	0	0	0	0	0	0	0
RHOB	388	symbol	H. sapiens	388	H. sapiens	RHOB	ras homolog family member B	GO:0003159 morphogenesis of an endothelium;GO:0061154 endothelial tube morphogenesis;GO:0008333 endosome to lysosome transport		Cancer-related genes:Candidate cancer biomarkers; Predicted intracellular proteins		Botulinum toxin type A	(M153)PID P75 NTR PATHWAY; (M124)PID CXCR4 PATHWAY	(M5941)HALLMARK UV RESPONSE UP; (M5902)HALLMARK APOPTOSIS; (M5947)HALLMARK IL2 STAT5 SIGNALING	1	0	0	0	0	1	0	1	0	1	1	1	0	0	0	0	0	0	0	0
RIMKLB	57494	symbol	H. sapiens	57494	H. sapiens	RIMKLB	ribosomal modification protein rimK like family member B	GO:0009064 glutamine family amino acid metabolic process;GO:1901605 alpha-amino acid metabolic process;GO:0006520 cellular amino acid metabolic process		Predicted intracellular proteins; Enzymes; ENZYME proteins:Ligase	Centriolar satellite;Nucleoplasm (Approved)				0	0	0	0	0	0	0	0	0	0	0	0	0	0	0	0	0	0	0	0
RMRP	6023	symbol	H. sapiens	6023	H. sapiens	RMRP	RNA component of mitochondrial RNA processing endoribonuclease	GO:0062103 double-stranded RNA biosynthetic process;GO:1903704 negative regulation of production of siRNA involved in RNA interference;GO:1900369 negative regulation of RNA interference							1	0	0	1	0	0	0	0	0	0	0	0	0	0	0	0	0	0	0	0
ROR1	4919	symbol	H. sapiens	4919	H. sapiens	ROR1	receptor tyrosine kinase like orphan receptor 1	GO:0014002 astrocyte development;GO:0060071 Wnt signaling pathway, planar cell polarity pathway;GO:0090175 regulation of establishment of planar polarity	Tyr protein kinase family	Kinases:Tyr protein kinases; Predicted intracellular proteins; Enzymes; Disease related genes; Potential drug targets	Microtubules (Approved)				1	0	0	0	0	0	0	0	0	0	0	0	0	0	0	0	0	0	0	0
RPL39	6170	symbol	H. sapiens	6170	H. sapiens	RPL39	ribosomal protein L39	GO:0002227 innate immune response in mucosa;GO:0002385 mucosal immune response;GO:0002251 organ or tissue specific immune response		Predicted intracellular proteins; Ribosomal proteins				(M5950)HALLMARK ALLOGRAFT REJECTION	1	0	0	0	0	1	0	0	1	0	0	0	0	0	0	0	1	0	0	0
RPL41	6171	symbol	H. sapiens	6171	H. sapiens	RPL41	ribosomal protein L41	GO:0002181 cytoplasmic translation;GO:0006412 translation;GO:0043043 peptide biosynthetic process		Predicted intracellular proteins; Ribosomal proteins	Endoplasmic reticulum (Supported)				1	0	0	0	0	0	0	0	0	0	0	0	0	0	0	0	1	0	0	0
RPPH1	85495	symbol	H. sapiens	85495	H. sapiens	RPPH1	ribonuclease P RNA component H1	GO:0090502 RNA phosphodiester bond hydrolysis, endonucleolytic;GO:0008033 tRNA processing;GO:0090501 RNA phosphodiester bond hydrolysis							0	0	0	0	0	0	0	0	0	0	0	0	0	0	0	0	0	0	0	0
RPS17	6218	symbol	H. sapiens	6218	H. sapiens	RPS17	ribosomal protein S17	GO:0042274 ribosomal small subunit biogenesis;GO:0006413 translational initiation;GO:0034101 erythrocyte homeostasis		Predicted intracellular proteins; Ribosomal proteins; Disease related genes	Cytosol;Endoplasmic reticulum (Approved); Additional: Nucleoli	Artenimol			1	0	0	0	0	0	0	0	0	0	0	0	0	0	0	0	1	0	0	0
RPS23	6228	symbol	H. sapiens	6228	H. sapiens	RPS23	ribosomal protein S23	GO:1990145 maintenance of translational fidelity;GO:0034063 stress granule assembly;GO:0002181 cytoplasmic translation		Predicted intracellular proteins; Ribosomal proteins; Disease related genes	Cytosol;Endoplasmic reticulum (Enhanced)				1	0	0	0	0	0	0	0	0	0	0	0	0	0	0	0	1	0	0	0
RTL1	388015	symbol	H. sapiens	388015	H. sapiens	RTL1	retrotransposon Gag like 1				Cytosol (Approved)				0	0	0	0	0	0	0	0	0	0	0	0	0	0	0	0	0	0	0	0
SCARNA10	692148	symbol	H. sapiens	692148	H. sapiens	SCARNA10	small Cajal body-specific RNA 10	GO:0006396 RNA processing;GO:0016070 RNA metabolic process;GO:0090304 nucleic acid metabolic process							0	0	0	0	0	0	0	0	0	0	0	0	0	0	0	0	0	0	0	0
SCARNA12	677777	symbol	H. sapiens	677777	H. sapiens	SCARNA12	small Cajal body-specific RNA 12	GO:0006396 RNA processing;GO:0016070 RNA metabolic process;GO:0090304 nucleic acid metabolic process							0	0	0	0	0	0	0	0	0	0	0	0	0	0	0	0	0	0	0	0
SCARNA2	677766	symbol	H. sapiens	677766	H. sapiens	SCARNA2	small Cajal body-specific RNA 2	GO:0006396 RNA processing;GO:0016070 RNA metabolic process;GO:0090304 nucleic acid metabolic process							0	0	0	0	0	0	0	0	0	0	0	0	0	0	0	0	0	0	0	0
SCARNA7	677767	symbol	H. sapiens	677767	H. sapiens	SCARNA7	small Cajal body-specific RNA 7	GO:0006396 RNA processing;GO:0016070 RNA metabolic process;GO:0090304 nucleic acid metabolic process							0	0	0	0	0	0	0	0	0	0	0	0	0	0	0	0	0	0	0	0
SCARNA9	619383	symbol	H. sapiens	619383	H. sapiens	SCARNA9	small Cajal body-specific RNA 9	GO:0006396 RNA processing;GO:0016070 RNA metabolic process;GO:0090304 nucleic acid metabolic process							0	0	0	0	0	0	0	0	0	0	0	0	0	0	0	0	0	0	0	0
SCRG1	11341	symbol	H. sapiens	11341	H. sapiens	SCRG1	stimulator of chondrogenesis 1	GO:0007399 nervous system development;GO:0048731 system development;GO:0007275 multicellular organism development		Predicted secreted proteins					0	0	0	0	0	0	0	0	0	0	0	0	0	0	0	0	0	0	0	0
SLC12A2	6558	symbol	H. sapiens	6558	H. sapiens	SLC12A2	solute carrier family 12 member 2	GO:0045795 positive regulation of cell volume;GO:0061528 aspartate secretion;GO:1904448 regulation of aspartate secretion		FDA approved drug targets:Small molecule drugs; Transporters:Electrochemical Potential-driven transporters	Vesicles (Approved); Additional: Plasma membrane	Torasemide; Potassium chloride; Bumetanide; Quinethazone		(M5951)HALLMARK SPERMATOGENESIS; (M5901)HALLMARK G2M CHECKPOINT	0	0	0	0	0	0	0	0	0	0	1	0	0	0	0	1	0	0	0	0
SLC25A33	84275	symbol	H. sapiens	84275	H. sapiens	SLC25A33	solute carrier family 25 member 33	GO:0006864 pyrimidine nucleotide transport;GO:1990519 pyrimidine nucleotide import into mitochondrion;GO:0031930 mitochondria-nucleus signaling pathway		Transporters:Electrochemical Potential-driven transporters					0	0	0	0	0	0	0	0	0	0	0	0	0	0	0	0	0	0	0	1
SLC30A7	148867	symbol	H. sapiens	148867	H. sapiens	SLC30A7	solute carrier family 30 member 7	GO:0032119 sequestering of zinc ion;GO:0051238 sequestering of metal ion;GO:0006829 zinc ion transport		Predicted intracellular proteins; Transporters:Electrochemical Potential-driven transporters	Golgi apparatus (Supported)				0	0	0	0	0	0	0	0	0	1	0	0	0	0	0	0	0	0	0	0
SLC7A5P2	387254	symbol	H. sapiens	387254	H. sapiens	SLC7A5P2	solute carrier family 7 member 5 pseudogene 2	GO:1902475 L-alpha-amino acid transmembrane transport;GO:0015807 L-amino acid transport;GO:0003333 amino acid transmembrane transport							0	0	0	0	0	0	0	0	0	0	0	0	0	0	0	0	0	0	0	0
SMG1P5	595101	symbol	H. sapiens	595101	H. sapiens	SMG1P5	SMG1 pseudogene 5								0	0	0	0	0	0	0	0	0	0	0	0	0	0	0	0	0	0	0	0
SMURF1	57154	symbol	H. sapiens	57154	H. sapiens	SMURF1	SMAD specific E3 ubiquitin protein ligase 1	GO:0061736 engulfment of target by autophagosome;GO:0061753 substrate localization to autophagosome;GO:0071211 protein targeting to vacuole involved in autophagy		ENZYME proteins:Transferases; Predicted intracellular proteins; Enzymes	Vesicles (Approved); Additional: Nucleoplasm		(M181)PID BMP PATHWAY; (M286)PID TGFBR PATHWAY; (M101)PID HDAC CLASSI PATHWAY	(M5896)HALLMARK TGF BETA SIGNALING	1	0	0	0	0	0	0	0	0	0	0	0	0	0	0	0	0	0	0	0
SNHG16	100507246	symbol	H. sapiens	100507246	H. sapiens	SNHG16	small nucleolar RNA host gene 16								0	0	0	0	0	0	0	0	0	0	0	0	0	0	0	0	0	0	0	0
SNORA16A	692073	symbol	H. sapiens	692073	H. sapiens	SNORA16A	small nucleolar RNA, H/ACA box 16A	GO:0006396 RNA processing;GO:0016070 RNA metabolic process;GO:0090304 nucleic acid metabolic process							0	0	0	0	0	0	0	0	0	0	0	0	0	0	0	0	0	0	0	0
SNORA23	677808	symbol	H. sapiens	677808	H. sapiens	SNORA23	small nucleolar RNA, H/ACA box 23	GO:0006396 RNA processing;GO:0016070 RNA metabolic process;GO:0090304 nucleic acid metabolic process							0	0	0	0	0	0	0	0	0	0	0	0	0	0	0	0	0	0	0	0
SNORA48	652965	symbol	H. sapiens	652965	H. sapiens	SNORA48	small nucleolar RNA, H/ACA box 48	GO:0006396 RNA processing;GO:0016070 RNA metabolic process;GO:0090304 nucleic acid metabolic process							0	0	0	0	0	0	0	0	0	0	0	0	0	0	0	0	0	0	0	0
SNORA52	619565	symbol	H. sapiens	619565	H. sapiens	SNORA52	small nucleolar RNA, H/ACA box 52	GO:0006396 RNA processing;GO:0016070 RNA metabolic process;GO:0090304 nucleic acid metabolic process							0	0	0	0	0	0	0	0	0	0	0	0	0	0	0	0	0	0	0	0
SNORA57	692158	symbol	H. sapiens	692158	H. sapiens	SNORA57	small nucleolar RNA, H/ACA box 57	GO:0006396 RNA processing;GO:0016070 RNA metabolic process;GO:0090304 nucleic acid metabolic process							0	0	0	0	0	0	0	0	0	0	0	0	0	0	0	0	0	0	0	0
SNORA63	6043	symbol	H. sapiens	6043	H. sapiens	SNORA63	small nucleolar RNA, H/ACA box 63	GO:0006396 RNA processing;GO:0016070 RNA metabolic process;GO:0090304 nucleic acid metabolic process							0	0	0	0	0	0	0	0	0	0	0	0	0	0	0	0	0	0	0	0
SNORA70	26778	symbol	H. sapiens	26778	H. sapiens	SNORA70	small nucleolar RNA, H/ACA box 70	GO:0006396 RNA processing;GO:0016070 RNA metabolic process;GO:0090304 nucleic acid metabolic process							0	0	0	0	0	0	0	0	0	0	0	0	0	0	0	0	0	0	0	0
SNORA73B	26768	symbol	H. sapiens	26768	H. sapiens	SNORA73B	small nucleolar RNA, H/ACA box 73B	GO:0006396 RNA processing;GO:0016070 RNA metabolic process;GO:0090304 nucleic acid metabolic process							0	0	0	0	0	0	0	0	0	0	0	0	0	0	0	0	0	0	0	0
SNORA76C	677842	gene_synonym	H. sapiens	677842	H. sapiens	SNORA50C	small nucleolar RNA, H/ACA box 50C	GO:0006396 RNA processing;GO:0016070 RNA metabolic process;GO:0090304 nucleic acid metabolic process							0	0	0	0	0	0	0	0	0	0	0	0	0	0	0	0	0	0	0	0
SNORA7B	677797	symbol	H. sapiens	677797	H. sapiens	SNORA7B	small nucleolar RNA, H/ACA box 7B	GO:0006396 RNA processing;GO:0016070 RNA metabolic process;GO:0090304 nucleic acid metabolic process							0	0	0	0	0	0	0	0	0	0	0	0	0	0	0	0	0	0	0	0
SNORD17	692086	symbol	H. sapiens	692086	H. sapiens	SNORD17	small nucleolar RNA, C/D box 17	GO:0006396 RNA processing;GO:0016070 RNA metabolic process;GO:0090304 nucleic acid metabolic process							0	0	0	0	0	0	0	0	0	0	0	0	0	0	0	0	0	0	0	0
SNURF	8926	symbol	H. sapiens	8926	H. sapiens	SNURF	SNRPN upstream open reading frame	GO:0008150 biological_process		Predicted intracellular proteins	Nuclear speckles (Supported)		(M58)PID AR PATHWAY		0	0	0	0	0	0	0	0	0	0	0	0	0	0	0	0	0	0	0	0
SNX22	79856	symbol	H. sapiens	79856	H. sapiens	SNX22	sorting nexin 22	GO:0015031 protein transport;GO:0045184 establishment of protein localization;GO:0071705 nitrogen compound transport		Predicted intracellular proteins	Vesicles (Approved); Additional: Nucleoplasm				0	0	0	0	0	0	0	0	0	0	0	0	0	0	0	0	0	0	0	0
SORBS2	8470	symbol	H. sapiens	8470	H. sapiens	SORBS2	sorbin and SH3 domain containing 2	GO:0003298 physiological muscle hypertrophy;GO:0003301 physiological cardiac muscle hypertrophy;GO:0061049 cell growth involved in cardiac muscle cell development		Predicted intracellular proteins				(M5893)HALLMARK MITOTIC SPINDLE	0	0	0	0	0	0	0	0	0	0	0	0	0	1	0	0	0	0	0	0
SPTBN1	6711	symbol	H. sapiens	6711	H. sapiens	SPTBN1	spectrin beta, non-erythrocytic 1	GO:0007182 common-partner SMAD protein phosphorylation;GO:0060390 regulation of SMAD protein signal transduction;GO:0032743 positive regulation of interleukin-2 production		Predicted intracellular proteins	Golgi apparatus (Approved)	Calcium; 1D-myo-inositol 1,4,5-trisphosphate	(M286)PID TGFBR PATHWAY	(M5896)HALLMARK TGF BETA SIGNALING; (M5893)HALLMARK MITOTIC SPINDLE	1	0	0	1	0	0	0	0	0	0	1	0	0	0	0	0	0	0	0	0
SRGN	5552	symbol	H. sapiens	5552	H. sapiens	SRGN	serglycin	GO:0033371 T cell secretory granule organization;GO:0033367 protein localization to mast cell secretory granule;GO:0033368 protease localization to mast cell secretory granule		Predicted intracellular proteins	Golgi apparatus (Supported)		(M5882)NABA PROTEOGLYCANS; (M5884)NABA CORE MATRISOME; (M5889)NABA MATRISOME	(M5950)HALLMARK ALLOGRAFT REJECTION	1	0	0	0	0	0	1	0	0	1	0	0	0	1	0	0	0	0	0	0
STAG3L3	442578	symbol	H. sapiens	442578	H. sapiens	STAG3L3	stromal antigen 3-like 3 (pseudogene)	GO:0007062 sister chromatid cohesion;GO:0000819 sister chromatid segregation;GO:0098813 nuclear chromosome segregation							0	0	0	0	0	0	0	0	0	0	0	0	0	0	0	0	0	0	0	0
STX11	8676	symbol	H. sapiens	8676	H. sapiens	STX11	syntaxin 11	GO:0031629 synaptic vesicle fusion to presynaptic active zone membrane;GO:0099500 vesicle fusion to plasma membrane;GO:0048499 synaptic vesicle membrane organization		Predicted intracellular proteins; Disease related genes					0	0	0	0	0	0	0	0	0	0	0	0	0	0	0	0	0	0	0	0
SVEP1	79987	symbol	H. sapiens	79987	H. sapiens	SVEP1	sushi, von Willebrand factor type A, EGF and pentraxin domain containing 1	GO:0003017 lymph circulation;GO:0048014 Tie signaling pathway;GO:0036303 lymph vessel morphogenesis		Predicted intracellular proteins			(M3008)NABA ECM GLYCOPROTEINS; (M5884)NABA CORE MATRISOME; (M5889)NABA MATRISOME		0	0	0	0	0	0	1	0	0	0	0	0	0	0	0	0	0	0	0	0
TANGO6	79613	symbol	H. sapiens	79613	H. sapiens	TANGO6	transport and golgi organization 6 homolog	GO:0009306 protein secretion;GO:0035592 establishment of protein localization to extracellular region;GO:0071692 protein localization to extracellular region			Golgi apparatus (Approved); Additional: Cytosol				0	0	0	0	0	0	0	0	0	0	0	0	0	0	0	0	0	0	0	0
TERC	7012	symbol	H. sapiens	7012	H. sapiens	TERC	telomerase RNA component	GO:2000773 negative regulation of cellular senescence;GO:0090344 negative regulation of cell aging;GO:2000772 regulation of cellular senescence							1	0	0	0	0	0	0	0	0	0	0	0	0	0	0	0	0	1	0	0
TIMM8B	26521	symbol	H. sapiens	26521	H. sapiens	TIMM8B	translocase of inner mitochondrial membrane 8 homolog B	GO:0045039 protein insertion into mitochondrial inner membrane;GO:0051204 protein insertion into mitochondrial membrane;GO:0090151 establishment of protein localization to mitochondrial membrane		Predicted intracellular proteins				(M5936)HALLMARK OXIDATIVE PHOSPHORYLATION	0	0	0	0	0	0	0	0	0	0	0	0	0	0	0	0	0	0	0	0
TIPARP-AS1	100287227	symbol	H. sapiens	100287227	H. sapiens	TIPARP-AS1	TIPARP antisense RNA 1								0	0	0	0	0	0	0	0	0	0	0	0	0	0	0	0	0	0	0	0
TMEM14E	645843	gene_synonym	H. sapiens	645843	H. sapiens	TMEM14EP	transmembrane protein 14E, pseudogene	GO:0006839 mitochondrial transport;GO:0006810 transport;GO:0051234 establishment of localization							0	0	0	0	0	0	0	0	0	0	0	0	0	0	0	0	0	0	0	0
TMEM159	57146	gene_synonym	H. sapiens	57146	H. sapiens	LDAF1	lipid droplet assembly factor 1	GO:0140042 lipid droplet formation;GO:0034389 lipid droplet organization;GO:0019915 lipid storage		Predicted intracellular proteins	Vesicles (Approved)				0	0	0	0	0	0	0	0	0	1	0	0	0	0	1	0	0	0	0	0
TMEM178A	130733	symbol	H. sapiens	130733	H. sapiens	TMEM178A	transmembrane protein 178A	GO:0045671 negative regulation of osteoclast differentiation;GO:0002762 negative regulation of myeloid leukocyte differentiation;GO:0045670 regulation of osteoclast differentiation		Predicted intracellular proteins; Transporters:Accessory Factors Involved in Transport	Vesicles (Approved); Additional: Nucleoplasm				0	0	1	0	0	0	0	0	0	0	0	0	0	0	0	0	0	0	0	0
TMEM178B	100507421	symbol	H. sapiens	100507421	H. sapiens	TMEM178B	transmembrane protein 178B				Vesicles (Approved); Additional: Nucleoli				0	0	0	0	0	0	0	0	0	0	0	0	0	0	0	0	0	0	0	0
TMEM200A	114801	symbol	H. sapiens	114801	H. sapiens	TMEM200A	transmembrane protein 200A								0	0	0	0	0	0	0	0	0	0	0	0	0	0	0	0	0	0	0	0
TNXB	7148	symbol	H. sapiens	7148	H. sapiens	TNXB	tenascin XB	GO:0048251 elastic fiber assembly;GO:0085029 extracellular matrix assembly;GO:0043506 regulation of JUN kinase activity		Predicted intracellular proteins; Predicted secreted proteins; Disease related genes			(M3008)NABA ECM GLYCOPROTEINS; (M5884)NABA CORE MATRISOME; (M5889)NABA MATRISOME		0	0	0	0	0	1	1	1	0	0	0	0	1	0	0	0	0	0	0	0
TOR1AIP2	163590	symbol	H. sapiens	163590	H. sapiens	TOR1AIP2	torsin 1A interacting protein 2	GO:0090435 protein localization to nuclear envelope;GO:0032781 positive regulation of ATPase activity;GO:0043462 regulation of ATPase activity		Predicted intracellular proteins	Endoplasmic reticulum (Enhanced)			(M5953)HALLMARK KRAS SIGNALING UP	0	0	0	0	0	0	0	0	0	0	0	0	0	0	0	0	0	0	0	0
TRIM16	10626	symbol	H. sapiens	10626	H. sapiens	TRIM16	tripartite motif containing 16	GO:0048386 positive regulation of retinoic acid receptor signaling pathway;GO:0048385 regulation of retinoic acid receptor signaling pathway;GO:0045618 positive regulation of keratinocyte differentiation		Predicted intracellular proteins	Cytosol (Supported); Additional: Plasma membrane				0	0	0	0	0	0	0	0	0	0	1	0	0	0	0	0	0	0	1	1
TULP4	56995	symbol	H. sapiens	56995	H. sapiens	TULP4	TUB like protein 4	GO:0016567 protein ubiquitination;GO:0032446 protein modification by small protein conjugation;GO:0070647 protein modification by small protein conjugation or removal		Predicted intracellular proteins					0	0	0	0	0	0	0	0	0	0	0	0	0	0	0	0	0	0	0	0
UBE2V1	7335	symbol	H. sapiens	7335	H. sapiens	UBE2V1	ubiquitin conjugating enzyme E2 V1	GO:0006301 postreplication repair;GO:0070534 protein K63-linked ubiquitination;GO:0006282 regulation of DNA repair		Predicted intracellular proteins	Nucleoplasm (Enhanced)		(M110)PID IL1 PATHWAY		1	0	0	1	0	0	0	0	0	0	0	0	0	0	0	0	0	0	0	0
UGCG	7357	symbol	H. sapiens	7357	H. sapiens	UGCG	UDP-glucose ceramide glucosyltransferase	GO:0006679 glucosylceramide biosynthetic process;GO:1903575 cornified envelope assembly;GO:0006678 glucosylceramide metabolic process		ENZYME proteins:Transferases; FDA approved drug targets:Small molecule drugs; Transporters; Enzymes		Miglustat; Eliglustat	(M143)PID IL2 PI3K PATHWAY	(M5906)HALLMARK ESTROGEN RESPONSE EARLY	0	0	0	0	0	0	0	0	0	0	0	0	0	0	1	0	0	0	0	1
UVRAG	7405	symbol	H. sapiens	7405	H. sapiens	UVRAG	UV radiation resistance associated	GO:0051684 maintenance of Golgi location;GO:1901098 positive regulation of autophagosome maturation;GO:0097680 double-strand break repair via classical nonhomologous end joining		Predicted intracellular proteins; Disease related genes					0	0	0	0	0	0	0	1	0	1	0	0	0	0	0	0	0	0	0	0
VTN	7448	symbol	H. sapiens	7448	H. sapiens	VTN	vitronectin	GO:0061302 smooth muscle cell-matrix adhesion;GO:0030949 positive regulation of vascular endothelial growth factor receptor signaling pathway;GO:0030947 regulation of vascular endothelial growth factor receptor signaling pathway		Cancer-related genes:Candidate cancer biomarkers; Candidate cardiovascular disease genes; Predicted secreted proteins	Endoplasmic reticulum;Vesicles (Supported)	Abciximab; Zinc; Copper; Zinc acetate; Zinc chloride; Zinc sulfate, unspecified form	(M212)PID INTEGRIN5 PATHWAY; (M174)PID UPA UPAR PATHWAY; (M53)PID INTEGRIN3 PATHWAY	(M5944)HALLMARK ANGIOGENESIS; (M5934)HALLMARK XENOBIOTIC METABOLISM	0	0	0	0	0	0	1	1	0	0	0	0	0	0	0	0	0	0	0	0
ZBTB20	26137	symbol	H. sapiens	26137	H. sapiens	ZBTB20	zinc finger and BTB domain containing 20	GO:0045821 positive regulation of glycolytic process;GO:1903580 positive regulation of ATP metabolic process;GO:0045981 positive regulation of nucleotide metabolic process		Transcription factors:Zinc-coordinating DNA-binding domains; Disease related genes; Predicted intracellular proteins	Nuclear bodies;Nucleoplasm (Enhanced)				0	0	0	0	0	0	0	0	0	0	0	0	0	0	0	0	0	0	0	0
ZBTB46	140685	symbol	H. sapiens	140685	H. sapiens	ZBTB46	zinc finger and BTB domain containing 46	GO:2001200 positive regulation of dendritic cell differentiation;GO:2001199 negative regulation of dendritic cell differentiation;GO:0045650 negative regulation of macrophage differentiation		Transcription factors:Zinc-coordinating DNA-binding domains; Predicted intracellular proteins	Nucleoplasm (Approved)				0	0	1	0	0	0	0	0	0	0	0	0	0	0	0	0	0	0	0	0
ZMAT3	64393	symbol	H. sapiens	64393	H. sapiens	ZMAT3	zinc finger matrin-type 3	GO:0043065 positive regulation of apoptotic process;GO:0043068 positive regulation of programmed cell death;GO:0010942 positive regulation of cell death		Predicted intracellular proteins	Nucleoplasm (Supported)			(M5939)HALLMARK P53 PATHWAY	0	0	0	0	0	0	0	0	0	0	0	0	0	0	0	0	0	1	0	0
ZNF460	10794	symbol	H. sapiens	10794	H. sapiens	ZNF460	zinc finger protein 460	GO:0006357 regulation of transcription by RNA polymerase II;GO:0006366 transcription by RNA polymerase II;GO:0006355 regulation of transcription, DNA-templated		Transcription factors:Zinc-coordinating DNA-binding domains; Predicted intracellular proteins	Nucleoplasm (Approved)				0	0	0	0	0	0	0	0	0	0	0	0	0	0	0	0	0	0	0	0
ZNF557	79230	symbol	H. sapiens	79230	H. sapiens	ZNF557	zinc finger protein 557	GO:0000122 negative regulation of transcription by RNA polymerase II;GO:0045892 negative regulation of transcription, DNA-templated;GO:1903507 negative regulation of nucleic acid-templated transcription		Transcription factors:Zinc-coordinating DNA-binding domains; Predicted intracellular proteins	Intermediate filaments;Nucleoplasm (Approved); Additional: Cytosol				0	0	0	0	0	0	0	0	0	0	0	0	0	0	0	0	0	0	0	0
ZNF652	22834	symbol	H. sapiens	22834	H. sapiens	ZNF652	zinc finger protein 652	GO:0006357 regulation of transcription by RNA polymerase II;GO:0006366 transcription by RNA polymerase II;GO:0006355 regulation of transcription, DNA-templated		Transcription factors:Zinc-coordinating DNA-binding domains; Predicted intracellular proteins	Nucleoplasm (Approved)				0	0	0	0	0	0	0	0	0	0	0	0	0	0	0	0	0	0	0	0
ZNF805	390980	symbol	H. sapiens	390980	H. sapiens	ZNF805	zinc finger protein 805	GO:0006357 regulation of transcription by RNA polymerase II;GO:0006366 transcription by RNA polymerase II;GO:0006355 regulation of transcription, DNA-templated		Transcription factors:Zinc-coordinating DNA-binding domains; Predicted intracellular proteins	Nucleoplasm (Approved)				0	0	0	0	0	0	0	0	0	0	0	0	0	0	0	0	0	0	0	0
ZXDB	158586	symbol	H. sapiens	158586	H. sapiens	ZXDB	zinc finger X-linked duplicated B	GO:0006357 regulation of transcription by RNA polymerase II;GO:0006366 transcription by RNA polymerase II;GO:0006355 regulation of transcription, DNA-templated		Transcription factors:Zinc-coordinating DNA-binding domains; Predicted intracellular proteins	Nucleoplasm (Approved)				0	0	0	0	0	0	0	0	0	0	0	0	0	0	0	0	0	0	0	0

## Sheet: Enrichment
GroupID	Category	Term	Description	LogP	Log(q-value)	InTerm_InList	Genes	Symbols
1_Summary	Reactome Gene Sets	R-HSA-3214815	HDACs deacetylate histones	-46.8327	-42.471	34/94	3012,3017,8329,8330,8332,8334,8336,8338,8341,8342,8345,8348,8349,8350,8351,8352,8353,8354,8355,8357,8360,8365,8366,8367,8368,8968,8969,8970,85235,85236,121504,317772,440689,653604,718,2354,2790,2074,2353,3490,3569,3576,3006,3007,3008,3009,4193,388,63976,255324,9619,182,3714,571,2936,4306,6170,6171,6218,6228,729438,3708,4919,8322,57154,84333,6023,10984,6711,8654,10395,121512,3105,3082,7012,5936,29…	H2AC8,H2BC5,H2AC13,H2AC15,H2AC16,H2AC6,H2AC17,H2AC20,H2BC15,H2BC14,H2BC9,H2BC17,H2BC21,H3C1,H3C4,H3C3,H3C6,H3C11,H3C8,H3C10,H4C4,H4C8,H4C2,H4C5,H4C13,H3C7,H2AC11,H2BC11,H2AC12,H2BC12,H4-16,H2AC21,H2BC18,H3C13,C3,FOSB,GNG10,ERCC6,FOS,IGFBP7,IL6,CXCL8,H1-2,H1-3,H1-4,H1-5,MDM2,RHOB,PRDM16,EPGN,ABCG1,JAG1,JAG2,BACH1,GSR,NR3C2,RPL39,RPL41,RPS17,RPS23,CASTOR2,ITPR1,ROR1,FZD4,SMURF1,PCGF5,RMRP,KCNQ1OT1,…
1_Member	Reactome Gene Sets	R-HSA-3214815	HDACs deacetylate histones	-46.8327	-42.471	34/94	3012,3017,8329,8330,8332,8334,8336,8338,8341,8342,8345,8348,8349,8350,8351,8352,8353,8354,8355,8357,8360,8365,8366,8367,8368,8968,8969,8970,85235,85236,121504,317772,440689,653604	H2AC8,H2BC5,H2AC13,H2AC15,H2AC16,H2AC6,H2AC17,H2AC20,H2BC15,H2BC14,H2BC9,H2BC17,H2BC21,H3C1,H3C4,H3C3,H3C6,H3C11,H3C8,H3C10,H4C4,H4C8,H4C2,H4C5,H4C13,H3C7,H2AC11,H2BC11,H2AC12,H2BC12,H4-16,H2AC21,H2BC18,H3C13
1_Member	Reactome Gene Sets	R-HSA-9610379	HCMV Late Events	-43.1594	-39.0987	34/116	3012,3017,8329,8330,8332,8334,8336,8338,8341,8342,8345,8348,8349,8350,8351,8352,8353,8354,8355,8357,8360,8365,8366,8367,8368,8968,8969,8970,85235,85236,121504,317772,440689,653604	H2AC8,H2BC5,H2AC13,H2AC15,H2AC16,H2AC6,H2AC17,H2AC20,H2BC15,H2BC14,H2BC9,H2BC17,H2BC21,H3C1,H3C4,H3C3,H3C6,H3C11,H3C8,H3C10,H4C4,H4C8,H4C2,H4C5,H4C13,H3C7,H2AC11,H2BC11,H2AC12,H2BC12,H4-16,H2AC21,H2BC18,H3C13
1_Member	KEGG Pathway	hsa05322	Systemic lupus erythematosus	-42.5679	-38.8083	35/133	718,3012,3017,8329,8330,8332,8334,8336,8338,8341,8342,8345,8348,8349,8350,8351,8352,8353,8354,8355,8357,8360,8365,8366,8367,8368,8968,8969,8970,85235,85236,121504,317772,440689,653604	C3,H2AC8,H2BC5,H2AC13,H2AC15,H2AC16,H2AC6,H2AC17,H2AC20,H2BC15,H2BC14,H2BC9,H2BC17,H2BC21,H3C1,H3C4,H3C3,H3C6,H3C11,H3C8,H3C10,H4C4,H4C8,H4C2,H4C5,H4C13,H3C7,H2AC11,H2BC11,H2AC12,H2BC12,H4-16,H2AC21,H2BC18,H3C13
1_Member	KEGG Pathway	ko05322	Systemic lupus erythematosus	-42.5679	-38.8083	35/133	718,3012,3017,8329,8330,8332,8334,8336,8338,8341,8342,8345,8348,8349,8350,8351,8352,8353,8354,8355,8357,8360,8365,8366,8367,8368,8968,8969,8970,85235,85236,121504,317772,440689,653604	C3,H2AC8,H2BC5,H2AC13,H2AC15,H2AC16,H2AC6,H2AC17,H2AC20,H2BC15,H2BC14,H2BC9,H2BC17,H2BC21,H3C1,H3C4,H3C3,H3C6,H3C11,H3C8,H3C10,H4C4,H4C8,H4C2,H4C5,H4C13,H3C7,H2AC11,H2BC11,H2AC12,H2BC12,H4-16,H2AC21,H2BC18,H3C13
1_Member	Reactome Gene Sets	R-HSA-9609690	HCMV Early Events	-40.6128	-36.9501	34/135	3012,3017,8329,8330,8332,8334,8336,8338,8341,8342,8345,8348,8349,8350,8351,8352,8353,8354,8355,8357,8360,8365,8366,8367,8368,8968,8969,8970,85235,85236,121504,317772,440689,653604	H2AC8,H2BC5,H2AC13,H2AC15,H2AC16,H2AC6,H2AC17,H2AC20,H2BC15,H2BC14,H2BC9,H2BC17,H2BC21,H3C1,H3C4,H3C3,H3C6,H3C11,H3C8,H3C10,H4C4,H4C8,H4C2,H4C5,H4C13,H3C7,H2AC11,H2BC11,H2AC12,H2BC12,H4-16,H2AC21,H2BC18,H3C13
1_Member	Reactome Gene Sets	R-HSA-3214847	HATs acetylate histones	-39.7802	-36.1966	34/142	3012,3017,8329,8330,8332,8334,8336,8338,8341,8342,8345,8348,8349,8350,8351,8352,8353,8354,8355,8357,8360,8365,8366,8367,8368,8968,8969,8970,85235,85236,121504,317772,440689,653604	H2AC8,H2BC5,H2AC13,H2AC15,H2AC16,H2AC6,H2AC17,H2AC20,H2BC15,H2BC14,H2BC9,H2BC17,H2BC21,H3C1,H3C4,H3C3,H3C6,H3C11,H3C8,H3C10,H4C4,H4C8,H4C2,H4C5,H4C13,H3C7,H2AC11,H2BC11,H2AC12,H2BC12,H4-16,H2AC21,H2BC18,H3C13
1_Member	KEGG Pathway	ko05034	Alcoholism	-39.0611	-35.5445	36/180	2354,2790,3012,3017,8329,8330,8332,8334,8336,8338,8341,8342,8345,8348,8349,8350,8351,8352,8353,8354,8355,8357,8360,8365,8366,8367,8368,8968,8969,8970,85235,85236,121504,317772,440689,653604	FOSB,GNG10,H2AC8,H2BC5,H2AC13,H2AC15,H2AC16,H2AC6,H2AC17,H2AC20,H2BC15,H2BC14,H2BC9,H2BC17,H2BC21,H3C1,H3C4,H3C3,H3C6,H3C11,H3C8,H3C10,H4C4,H4C8,H4C2,H4C5,H4C13,H3C7,H2AC11,H2BC11,H2AC12,H2BC12,H4-16,H2AC21,H2BC18,H3C13
1_Member	KEGG Pathway	hsa05034	Alcoholism	-38.5998	-35.1412	36/185	2354,2790,3012,3017,8329,8330,8332,8334,8336,8338,8341,8342,8345,8348,8349,8350,8351,8352,8353,8354,8355,8357,8360,8365,8366,8367,8368,8968,8969,8970,85235,85236,121504,317772,440689,653604	FOSB,GNG10,H2AC8,H2BC5,H2AC13,H2AC15,H2AC16,H2AC6,H2AC17,H2AC20,H2BC15,H2BC14,H2BC9,H2BC17,H2BC21,H3C1,H3C4,H3C3,H3C6,H3C11,H3C8,H3C10,H4C4,H4C8,H4C2,H4C5,H4C13,H3C7,H2AC11,H2BC11,H2AC12,H2BC12,H4-16,H2AC21,H2BC18,H3C13
1_Member	Reactome Gene Sets	R-HSA-9609646	HCMV Infection	-37.8429	-34.4354	34/160	3012,3017,8329,8330,8332,8334,8336,8338,8341,8342,8345,8348,8349,8350,8351,8352,8353,8354,8355,8357,8360,8365,8366,8367,8368,8968,8969,8970,85235,85236,121504,317772,440689,653604	H2AC8,H2BC5,H2AC13,H2AC15,H2AC16,H2AC6,H2AC17,H2AC20,H2BC15,H2BC14,H2BC9,H2BC17,H2BC21,H3C1,H3C4,H3C3,H3C6,H3C11,H3C8,H3C10,H4C4,H4C8,H4C2,H4C5,H4C13,H3C7,H2AC11,H2BC11,H2AC12,H2BC12,H4-16,H2AC21,H2BC18,H3C13
1_Member	Reactome Gene Sets	R-HSA-73728	RNA Polymerase I Promoter Opening	-37.6333	-34.2716	26/63	3012,3017,8334,8338,8341,8342,8345,8348,8349,8350,8351,8352,8353,8354,8355,8357,8360,8365,8366,8367,8368,8968,8970,85236,121504,653604	H2AC8,H2BC5,H2AC6,H2AC20,H2BC15,H2BC14,H2BC9,H2BC17,H2BC21,H3C1,H3C4,H3C3,H3C6,H3C11,H3C8,H3C10,H4C4,H4C8,H4C2,H4C5,H4C13,H3C7,H2BC11,H2BC12,H4-16,H3C13
1_Member	Reactome Gene Sets	R-HSA-5334118	DNA methylation	-37.1911	-33.8708	26/65	3012,3017,8334,8338,8341,8342,8345,8348,8349,8350,8351,8352,8353,8354,8355,8357,8360,8365,8366,8367,8368,8968,8970,85236,121504,653604	H2AC8,H2BC5,H2AC6,H2AC20,H2BC15,H2BC14,H2BC9,H2BC17,H2BC21,H3C1,H3C4,H3C3,H3C6,H3C11,H3C8,H3C10,H4C4,H4C8,H4C2,H4C5,H4C13,H3C7,H2BC11,H2BC12,H4-16,H3C13
1_Member	Reactome Gene Sets	R-HSA-427389	ERCC6 (CSB) and EHMT2 (G9a) positively regulate rRNA expression	-36.9134	-33.6309	27/76	2074,3012,3017,8334,8338,8341,8342,8345,8348,8349,8350,8351,8352,8353,8354,8355,8357,8360,8365,8366,8367,8368,8968,8970,85236,121504,653604	ERCC6,H2AC8,H2BC5,H2AC6,H2AC20,H2BC15,H2BC14,H2BC9,H2BC17,H2BC21,H3C1,H3C4,H3C3,H3C6,H3C11,H3C8,H3C10,H4C4,H4C8,H4C2,H4C5,H4C13,H3C7,H2BC11,H2BC12,H4-16,H3C13
1_Member	Reactome Gene Sets	R-HSA-5625886	Activated PKN1 stimulates transcription of AR (androgen receptor) regulated genes KLK2 and KLK3	-36.7663	-33.5186	26/67	3012,3017,8334,8338,8341,8342,8345,8348,8349,8350,8351,8352,8353,8354,8355,8357,8360,8365,8366,8367,8368,8968,8970,85236,121504,653604	H2AC8,H2BC5,H2AC6,H2AC20,H2BC15,H2BC14,H2BC9,H2BC17,H2BC21,H3C1,H3C4,H3C3,H3C6,H3C11,H3C8,H3C10,H4C4,H4C8,H4C2,H4C5,H4C13,H3C7,H2BC11,H2BC12,H4-16,H3C13
1_Member	Reactome Gene Sets	R-HSA-2559582	Senescence-Associated Secretory Phenotype (SASP)	-36.72	-33.5044	30/112	2353,3012,3017,3490,3569,3576,8334,8338,8341,8342,8345,8348,8349,8350,8351,8352,8353,8354,8355,8357,8360,8365,8366,8367,8368,8968,8970,85236,121504,653604	FOS,H2AC8,H2BC5,IGFBP7,IL6,CXCL8,H2AC6,H2AC20,H2BC15,H2BC14,H2BC9,H2BC17,H2BC21,H3C1,H3C4,H3C3,H3C6,H3C11,H3C8,H3C10,H4C4,H4C8,H4C2,H4C5,H4C13,H3C7,H2BC11,H2BC12,H4-16,H3C13
1_Member	Reactome Gene Sets	R-HSA-427359	SIRT1 negatively regulates rRNA expression	-36.5601	-33.3744	26/68	3012,3017,8334,8338,8341,8342,8345,8348,8349,8350,8351,8352,8353,8354,8355,8357,8360,8365,8366,8367,8368,8968,8970,85236,121504,653604	H2AC8,H2BC5,H2AC6,H2AC20,H2BC15,H2BC14,H2BC9,H2BC17,H2BC21,H3C1,H3C4,H3C3,H3C6,H3C11,H3C8,H3C10,H4C4,H4C8,H4C2,H4C5,H4C13,H3C7,H2BC11,H2BC12,H4-16,H3C13
1_Member	Reactome Gene Sets	R-HSA-2559583	Cellular Senescence	-36.0412	-32.8836	35/197	2353,3006,3007,3008,3009,3012,3017,3490,3569,3576,4193,8334,8338,8341,8342,8345,8348,8349,8350,8351,8352,8353,8354,8355,8357,8360,8365,8366,8367,8368,8968,8970,85236,121504,653604	FOS,H1-2,H1-3,H1-4,H1-5,H2AC8,H2BC5,IGFBP7,IL6,CXCL8,MDM2,H2AC6,H2AC20,H2BC15,H2BC14,H2BC9,H2BC17,H2BC21,H3C1,H3C4,H3C3,H3C6,H3C11,H3C8,H3C10,H4C4,H4C8,H4C2,H4C5,H4C13,H3C7,H2BC11,H2BC12,H4-16,H3C13
1_Member	Reactome Gene Sets	R-HSA-212300	PRC2 methylates histones and DNA	-35.5842	-32.4778	26/73	3012,3017,8334,8338,8341,8342,8345,8348,8349,8350,8351,8352,8353,8354,8355,8357,8360,8365,8366,8367,8368,8968,8970,85236,121504,653604	H2AC8,H2BC5,H2AC6,H2AC20,H2BC15,H2BC14,H2BC9,H2BC17,H2BC21,H3C1,H3C4,H3C3,H3C6,H3C11,H3C8,H3C10,H4C4,H4C8,H4C2,H4C5,H4C13,H3C7,H2BC11,H2BC12,H4-16,H3C13
1_Member	Reactome Gene Sets	R-HSA-9710421	Defective pyroptosis	-35.5842	-32.4778	26/73	3012,3017,8334,8338,8341,8342,8345,8348,8349,8350,8351,8352,8353,8354,8355,8357,8360,8365,8366,8367,8368,8968,8970,85236,121504,653604	H2AC8,H2BC5,H2AC6,H2AC20,H2BC15,H2BC14,H2BC9,H2BC17,H2BC21,H3C1,H3C4,H3C3,H3C6,H3C11,H3C8,H3C10,H4C4,H4C8,H4C2,H4C5,H4C13,H3C7,H2BC11,H2BC12,H4-16,H3C13
1_Member	Reactome Gene Sets	R-HSA-2299718	Condensation of Prophase Chromosomes	-35.3992	-32.3163	26/74	3012,3017,8334,8338,8341,8342,8345,8348,8349,8350,8351,8352,8353,8354,8355,8357,8360,8365,8366,8367,8368,8968,8970,85236,121504,653604	H2AC8,H2BC5,H2AC6,H2AC20,H2BC15,H2BC14,H2BC9,H2BC17,H2BC21,H3C1,H3C4,H3C3,H3C6,H3C11,H3C8,H3C10,H4C4,H4C8,H4C2,H4C5,H4C13,H3C7,H2BC11,H2BC12,H4-16,H3C13
1_Member	Reactome Gene Sets	R-HSA-5250924	B-WICH complex positively regulates rRNA expression	-34.422	-31.3614	27/91	2074,3012,3017,8334,8338,8341,8342,8345,8348,8349,8350,8351,8352,8353,8354,8355,8357,8360,8365,8366,8367,8368,8968,8970,85236,121504,653604	ERCC6,H2AC8,H2BC5,H2AC6,H2AC20,H2BC15,H2BC14,H2BC9,H2BC17,H2BC21,H3C1,H3C4,H3C3,H3C6,H3C11,H3C8,H3C10,H4C4,H4C8,H4C2,H4C5,H4C13,H3C7,H2BC11,H2BC12,H4-16,H3C13
1_Member	Reactome Gene Sets	R-HSA-5625740	RHO GTPases activate PKNs	-33.8419	-30.8024	27/95	388,3012,3017,8334,8338,8341,8342,8345,8348,8349,8350,8351,8352,8353,8354,8355,8357,8360,8365,8366,8367,8368,8968,8970,85236,121504,653604	RHOB,H2AC8,H2BC5,H2AC6,H2AC20,H2BC15,H2BC14,H2BC9,H2BC17,H2BC21,H3C1,H3C4,H3C3,H3C6,H3C11,H3C8,H3C10,H4C4,H4C8,H4C2,H4C5,H4C13,H3C7,H2BC11,H2BC12,H4-16,H3C13
1_Member	Reactome Gene Sets	R-HSA-912446	Meiotic recombination	-33.3967	-30.3775	26/86	3012,3017,8334,8338,8341,8342,8345,8348,8349,8350,8351,8352,8353,8354,8355,8357,8360,8365,8366,8367,8368,8968,8970,85236,121504,653604	H2AC8,H2BC5,H2AC6,H2AC20,H2BC15,H2BC14,H2BC9,H2BC17,H2BC21,H3C1,H3C4,H3C3,H3C6,H3C11,H3C8,H3C10,H4C4,H4C8,H4C2,H4C5,H4C13,H3C7,H2BC11,H2BC12,H4-16,H3C13
1_Member	Reactome Gene Sets	R-HSA-9616222	Transcriptional regulation of granulopoiesis	-32.8044	-29.8044	26/90	3012,3017,8334,8338,8341,8342,8345,8348,8349,8350,8351,8352,8353,8354,8355,8357,8360,8365,8366,8367,8368,8968,8970,85236,121504,653604	H2AC8,H2BC5,H2AC6,H2AC20,H2BC15,H2BC14,H2BC9,H2BC17,H2BC21,H3C1,H3C4,H3C3,H3C6,H3C11,H3C8,H3C10,H4C4,H4C8,H4C2,H4C5,H4C13,H3C7,H2BC11,H2BC12,H4-16,H3C13
1_Member	Reactome Gene Sets	R-HSA-3214858	RMTs methylate histone arginines	-32.6962	-29.7147	25/79	3012,8329,8330,8332,8334,8336,8338,8350,8351,8352,8353,8354,8355,8357,8360,8365,8366,8367,8368,8968,8969,85235,121504,317772,653604	H2AC8,H2AC13,H2AC15,H2AC16,H2AC6,H2AC17,H2AC20,H3C1,H3C4,H3C3,H3C6,H3C11,H3C8,H3C10,H4C4,H4C8,H4C2,H4C5,H4C13,H3C7,H2AC11,H2AC12,H4-16,H2AC21,H3C13
1_Member	Reactome Gene Sets	R-HSA-201722	Formation of the beta-catenin:TCF transactivating complex	-32.6612	-29.7145	26/91	3012,3017,8334,8338,8341,8342,8345,8348,8349,8350,8351,8352,8353,8354,8355,8357,8360,8365,8366,8367,8368,8968,8970,85236,121504,653604	H2AC8,H2BC5,H2AC6,H2AC20,H2BC15,H2BC14,H2BC9,H2BC17,H2BC21,H3C1,H3C4,H3C3,H3C6,H3C11,H3C8,H3C10,H4C4,H4C8,H4C2,H4C5,H4C13,H3C7,H2BC11,H2BC12,H4-16,H3C13
1_Member	Reactome Gene Sets	R-HSA-73772	RNA Polymerase I Promoter Escape	-32.6612	-29.7145	26/91	3012,3017,8334,8338,8341,8342,8345,8348,8349,8350,8351,8352,8353,8354,8355,8357,8360,8365,8366,8367,8368,8968,8970,85236,121504,653604	H2AC8,H2BC5,H2AC6,H2AC20,H2BC15,H2BC14,H2BC9,H2BC17,H2BC21,H3C1,H3C4,H3C3,H3C6,H3C11,H3C8,H3C10,H4C4,H4C8,H4C2,H4C5,H4C13,H3C7,H2BC11,H2BC12,H4-16,H3C13
1_Member	Reactome Gene Sets	R-HSA-5250913	Positive epigenetic regulation of rRNA expression	-32.3868	-29.466	27/106	2074,3012,3017,8334,8338,8341,8342,8345,8348,8349,8350,8351,8352,8353,8354,8355,8357,8360,8365,8366,8367,8368,8968,8970,85236,121504,653604	ERCC6,H2AC8,H2BC5,H2AC6,H2AC20,H2BC15,H2BC14,H2BC9,H2BC17,H2BC21,H3C1,H3C4,H3C3,H3C6,H3C11,H3C8,H3C10,H4C4,H4C8,H4C2,H4C5,H4C13,H3C7,H2BC11,H2BC12,H4-16,H3C13
1_Member	Reactome Gene Sets	R-HSA-1912408	Pre-NOTCH Transcription and Translation	-32.3806	-29.466	26/93	3012,3017,8334,8338,8341,8342,8345,8348,8349,8350,8351,8352,8353,8354,8355,8357,8360,8365,8366,8367,8368,8968,8970,85236,121504,653604	H2AC8,H2BC5,H2AC6,H2AC20,H2BC15,H2BC14,H2BC9,H2BC17,H2BC21,H3C1,H3C4,H3C3,H3C6,H3C11,H3C8,H3C10,H4C4,H4C8,H4C2,H4C5,H4C13,H3C7,H2BC11,H2BC12,H4-16,H3C13
1_Member	Reactome Gene Sets	R-HSA-73854	RNA Polymerase I Promoter Clearance	-31.9017	-29.0023	27/110	2074,3012,3017,8334,8338,8341,8342,8345,8348,8349,8350,8351,8352,8353,8354,8355,8357,8360,8365,8366,8367,8368,8968,8970,85236,121504,653604	ERCC6,H2AC8,H2BC5,H2AC6,H2AC20,H2BC15,H2BC14,H2BC9,H2BC17,H2BC21,H3C1,H3C4,H3C3,H3C6,H3C11,H3C8,H3C10,H4C4,H4C8,H4C2,H4C5,H4C13,H3C7,H2BC11,H2BC12,H4-16,H3C13
1_Member	Reactome Gene Sets	R-HSA-2559580	Oxidative Stress Induced Senescence	-31.851	-28.9701	28/125	2353,3012,3017,4193,8334,8338,8341,8342,8345,8348,8349,8350,8351,8352,8353,8354,8355,8357,8360,8365,8366,8367,8368,8968,8970,85236,121504,653604	FOS,H2AC8,H2BC5,MDM2,H2AC6,H2AC20,H2BC15,H2BC14,H2BC9,H2BC17,H2BC21,H3C1,H3C4,H3C3,H3C6,H3C11,H3C8,H3C10,H4C4,H4C8,H4C2,H4C5,H4C13,H3C7,H2BC11,H2BC12,H4-16,H3C13
1_Member	Reactome Gene Sets	R-HSA-8936459	RUNX1 regulates genes involved in megakaryocyte differentiation and platelet function	-31.8404	-28.9701	26/97	3012,3017,8334,8338,8341,8342,8345,8348,8349,8350,8351,8352,8353,8354,8355,8357,8360,8365,8366,8367,8368,8968,8970,85236,121504,653604	H2AC8,H2BC5,H2AC6,H2AC20,H2BC15,H2BC14,H2BC9,H2BC17,H2BC21,H3C1,H3C4,H3C3,H3C6,H3C11,H3C8,H3C10,H4C4,H4C8,H4C2,H4C5,H4C13,H3C7,H2BC11,H2BC12,H4-16,H3C13
1_Member	Reactome Gene Sets	R-HSA-73864	RNA Polymerase I Transcription	-31.6668	-28.8102	27/112	2074,3012,3017,8334,8338,8341,8342,8345,8348,8349,8350,8351,8352,8353,8354,8355,8357,8360,8365,8366,8367,8368,8968,8970,85236,121504,653604	ERCC6,H2AC8,H2BC5,H2AC6,H2AC20,H2BC15,H2BC14,H2BC9,H2BC17,H2BC21,H3C1,H3C4,H3C3,H3C6,H3C11,H3C8,H3C10,H4C4,H4C8,H4C2,H4C5,H4C13,H3C7,H2BC11,H2BC12,H4-16,H3C13
1_Member	GO Biological Processes	GO:0006334	nucleosome assembly	-31.4322	-28.589	28/129	3006,3007,3008,3009,3017,8341,8342,8345,8348,8349,8350,8351,8352,8353,8354,8355,8357,8360,8365,8366,8367,8368,8968,8970,85236,121504,440689,653604	H1-2,H1-3,H1-4,H1-5,H2BC5,H2BC15,H2BC14,H2BC9,H2BC17,H2BC21,H3C1,H3C4,H3C3,H3C6,H3C11,H3C8,H3C10,H4C4,H4C8,H4C2,H4C5,H4C13,H3C7,H2BC11,H2BC12,H4-16,H2BC18,H3C13
1_Member	Reactome Gene Sets	R-HSA-9645723	Diseases of programmed cell death	-31.0781	-28.2479	26/103	3012,3017,8334,8338,8341,8342,8345,8348,8349,8350,8351,8352,8353,8354,8355,8357,8360,8365,8366,8367,8368,8968,8970,85236,121504,653604	H2AC8,H2BC5,H2AC6,H2AC20,H2BC15,H2BC14,H2BC9,H2BC17,H2BC21,H3C1,H3C4,H3C3,H3C6,H3C11,H3C8,H3C10,H4C4,H4C8,H4C2,H4C5,H4C13,H3C7,H2BC11,H2BC12,H4-16,H3C13
1_Member	Reactome Gene Sets	R-HSA-3247509	Chromatin modifying enzymes	-30.8399	-28.0344	35/274	3012,3017,8329,8330,8332,8334,8336,8338,8341,8342,8345,8348,8349,8350,8351,8352,8353,8354,8355,8357,8360,8365,8366,8367,8368,8968,8969,8970,63976,85235,85236,121504,317772,440689,653604	H2AC8,H2BC5,H2AC13,H2AC15,H2AC16,H2AC6,H2AC17,H2AC20,H2BC15,H2BC14,H2BC9,H2BC17,H2BC21,H3C1,H3C4,H3C3,H3C6,H3C11,H3C8,H3C10,H4C4,H4C8,H4C2,H4C5,H4C13,H3C7,H2AC11,H2BC11,PRDM16,H2AC12,H2BC12,H4-16,H2AC21,H2BC18,H3C13
1_Member	Reactome Gene Sets	R-HSA-4839726	Chromatin organization	-30.8399	-28.0344	35/274	3012,3017,8329,8330,8332,8334,8336,8338,8341,8342,8345,8348,8349,8350,8351,8352,8353,8354,8355,8357,8360,8365,8366,8367,8368,8968,8969,8970,63976,85235,85236,121504,317772,440689,653604	H2AC8,H2BC5,H2AC13,H2AC15,H2AC16,H2AC6,H2AC17,H2AC20,H2BC15,H2BC14,H2BC9,H2BC17,H2BC21,H3C1,H3C4,H3C3,H3C6,H3C11,H3C8,H3C10,H4C4,H4C8,H4C2,H4C5,H4C13,H3C7,H2AC11,H2BC11,PRDM16,H2AC12,H2BC12,H4-16,H2AC21,H2BC18,H3C13
1_Member	Reactome Gene Sets	R-HSA-5578749	Transcriptional regulation by small RNAs	-30.7164	-27.9229	26/106	3012,3017,8334,8338,8341,8342,8345,8348,8349,8350,8351,8352,8353,8354,8355,8357,8360,8365,8366,8367,8368,8968,8970,85236,121504,653604	H2AC8,H2BC5,H2AC6,H2AC20,H2BC15,H2BC14,H2BC9,H2BC17,H2BC21,H3C1,H3C4,H3C3,H3C6,H3C11,H3C8,H3C10,H4C4,H4C8,H4C2,H4C5,H4C13,H3C7,H2BC11,H2BC12,H4-16,H3C13
1_Member	Reactome Gene Sets	R-HSA-427413	NoRC negatively regulates rRNA expression	-30.5985	-27.8166	26/107	3012,3017,8334,8338,8341,8342,8345,8348,8349,8350,8351,8352,8353,8354,8355,8357,8360,8365,8366,8367,8368,8968,8970,85236,121504,653604	H2AC8,H2BC5,H2AC6,H2AC20,H2BC15,H2BC14,H2BC9,H2BC17,H2BC21,H3C1,H3C4,H3C3,H3C6,H3C11,H3C8,H3C10,H4C4,H4C8,H4C2,H4C5,H4C13,H3C7,H2BC11,H2BC12,H4-16,H3C13
1_Member	Reactome Gene Sets	R-HSA-1912422	Pre-NOTCH Expression and Processing	-30.3665	-27.5959	26/109	3012,3017,8334,8338,8341,8342,8345,8348,8349,8350,8351,8352,8353,8354,8355,8357,8360,8365,8366,8367,8368,8968,8970,85236,121504,653604	H2AC8,H2BC5,H2AC6,H2AC20,H2BC15,H2BC14,H2BC9,H2BC17,H2BC21,H3C1,H3C4,H3C3,H3C6,H3C11,H3C8,H3C10,H4C4,H4C8,H4C2,H4C5,H4C13,H3C7,H2BC11,H2BC12,H4-16,H3C13
1_Member	Reactome Gene Sets	R-HSA-5250941	Negative epigenetic regulation of rRNA expression	-30.2524	-27.4928	26/110	3012,3017,8334,8338,8341,8342,8345,8348,8349,8350,8351,8352,8353,8354,8355,8357,8360,8365,8366,8367,8368,8968,8970,85236,121504,653604	H2AC8,H2BC5,H2AC6,H2AC20,H2BC15,H2BC14,H2BC9,H2BC17,H2BC21,H3C1,H3C4,H3C3,H3C6,H3C11,H3C8,H3C10,H4C4,H4C8,H4C2,H4C5,H4C13,H3C7,H2BC11,H2BC12,H4-16,H3C13
1_Member	Reactome Gene Sets	R-HSA-977225	Amyloid fiber formation	-30.1395	-27.3906	26/111	3012,3017,8334,8338,8341,8342,8345,8348,8349,8350,8351,8352,8353,8354,8355,8357,8360,8365,8366,8367,8368,8968,8970,85236,121504,653604	H2AC8,H2BC5,H2AC6,H2AC20,H2BC15,H2BC14,H2BC9,H2BC17,H2BC21,H3C1,H3C4,H3C3,H3C6,H3C11,H3C8,H3C10,H4C4,H4C8,H4C2,H4C5,H4C13,H3C7,H2BC11,H2BC12,H4-16,H3C13
1_Member	Reactome Gene Sets	R-HSA-9018519	Estrogen-dependent gene expression	-29.4549	-26.7165	28/150	2353,2354,3012,3017,8334,8338,8341,8342,8345,8348,8349,8350,8351,8352,8353,8354,8355,8357,8360,8365,8366,8367,8368,8968,8970,85236,121504,653604	FOS,FOSB,H2AC8,H2BC5,H2AC6,H2AC20,H2BC15,H2BC14,H2BC9,H2BC17,H2BC21,H3C1,H3C4,H3C3,H3C6,H3C11,H3C8,H3C10,H4C4,H4C8,H4C2,H4C5,H4C13,H3C7,H2BC11,H2BC12,H4-16,H3C13
1_Member	Reactome Gene Sets	R-HSA-1500620	Meiosis	-29.3811	-26.6529	26/118	3012,3017,8334,8338,8341,8342,8345,8348,8349,8350,8351,8352,8353,8354,8355,8357,8360,8365,8366,8367,8368,8968,8970,85236,121504,653604	H2AC8,H2BC5,H2AC6,H2AC20,H2BC15,H2BC14,H2BC9,H2BC17,H2BC21,H3C1,H3C4,H3C3,H3C6,H3C11,H3C8,H3C10,H4C4,H4C8,H4C2,H4C5,H4C13,H3C7,H2BC11,H2BC12,H4-16,H3C13
1_Member	Reactome Gene Sets	R-HSA-5617472	Activation of anterior HOX genes in hindbrain development during early embryogenesis	-29.0719	-26.3634	26/121	3012,3017,8334,8338,8341,8342,8345,8348,8349,8350,8351,8352,8353,8354,8355,8357,8360,8365,8366,8367,8368,8968,8970,85236,121504,653604	H2AC8,H2BC5,H2AC6,H2AC20,H2BC15,H2BC14,H2BC9,H2BC17,H2BC21,H3C1,H3C4,H3C3,H3C6,H3C11,H3C8,H3C10,H4C4,H4C8,H4C2,H4C5,H4C13,H3C7,H2BC11,H2BC12,H4-16,H3C13
1_Member	Reactome Gene Sets	R-HSA-5619507	Activation of HOX genes during differentiation	-29.0719	-26.3634	26/121	3012,3017,8334,8338,8341,8342,8345,8348,8349,8350,8351,8352,8353,8354,8355,8357,8360,8365,8366,8367,8368,8968,8970,85236,121504,653604	H2AC8,H2BC5,H2AC6,H2AC20,H2BC15,H2BC14,H2BC9,H2BC17,H2BC21,H3C1,H3C4,H3C3,H3C6,H3C11,H3C8,H3C10,H4C4,H4C8,H4C2,H4C5,H4C13,H3C7,H2BC11,H2BC12,H4-16,H3C13
1_Member	Reactome Gene Sets	R-HSA-8939236	RUNX1 regulates transcription of genes involved in differentiation of HSCs	-28.1952	-25.4962	26/130	3012,3017,8334,8338,8341,8342,8345,8348,8349,8350,8351,8352,8353,8354,8355,8357,8360,8365,8366,8367,8368,8968,8970,85236,121504,653604	H2AC8,H2BC5,H2AC6,H2AC20,H2BC15,H2BC14,H2BC9,H2BC17,H2BC21,H3C1,H3C4,H3C3,H3C6,H3C11,H3C8,H3C10,H4C4,H4C8,H4C2,H4C5,H4C13,H3C7,H2BC11,H2BC12,H4-16,H3C13
1_Member	GO Biological Processes	GO:0034728	nucleosome organization	-28.0739	-25.3843	28/167	3006,3007,3008,3009,3017,8341,8342,8345,8348,8349,8350,8351,8352,8353,8354,8355,8357,8360,8365,8366,8367,8368,8968,8970,85236,121504,440689,653604	H1-2,H1-3,H1-4,H1-5,H2BC5,H2BC15,H2BC14,H2BC9,H2BC17,H2BC21,H3C1,H3C4,H3C3,H3C6,H3C11,H3C8,H3C10,H4C4,H4C8,H4C2,H4C5,H4C13,H3C7,H2BC11,H2BC12,H4-16,H2BC18,H3C13
1_Member	Reactome Gene Sets	R-HSA-212165	Epigenetic regulation of gene expression	-28.037	-25.3565	27/149	2074,3012,3017,8334,8338,8341,8342,8345,8348,8349,8350,8351,8352,8353,8354,8355,8357,8360,8365,8366,8367,8368,8968,8970,85236,121504,653604	ERCC6,H2AC8,H2BC5,H2AC6,H2AC20,H2BC15,H2BC14,H2BC9,H2BC17,H2BC21,H3C1,H3C4,H3C3,H3C6,H3C11,H3C8,H3C10,H4C4,H4C8,H4C2,H4C5,H4C13,H3C7,H2BC11,H2BC12,H4-16,H3C13
1_Member	Reactome Gene Sets	R-HSA-211000	Gene Silencing by RNA	-27.4726	-24.8011	26/138	3012,3017,8334,8338,8341,8342,8345,8348,8349,8350,8351,8352,8353,8354,8355,8357,8360,8365,8366,8367,8368,8968,8970,85236,121504,653604	H2AC8,H2BC5,H2AC6,H2AC20,H2BC15,H2BC14,H2BC9,H2BC17,H2BC21,H3C1,H3C4,H3C3,H3C6,H3C11,H3C8,H3C10,H4C4,H4C8,H4C2,H4C5,H4C13,H3C7,H2BC11,H2BC12,H4-16,H3C13
1_Member	Reactome Gene Sets	R-HSA-68875	Mitotic Prophase	-27.1291	-24.4664	26/142	3012,3017,8334,8338,8341,8342,8345,8348,8349,8350,8351,8352,8353,8354,8355,8357,8360,8365,8366,8367,8368,8968,8970,85236,121504,653604	H2AC8,H2BC5,H2AC6,H2AC20,H2BC15,H2BC14,H2BC9,H2BC17,H2BC21,H3C1,H3C4,H3C3,H3C6,H3C11,H3C8,H3C10,H4C4,H4C8,H4C2,H4C5,H4C13,H3C7,H2BC11,H2BC12,H4-16,H3C13
1_Member	Reactome Gene Sets	R-HSA-8939211	ESR-mediated signaling	-27.1055	-24.4514	30/223	2353,2354,2790,3012,3017,8334,8338,8341,8342,8345,8348,8349,8350,8351,8352,8353,8354,8355,8357,8360,8365,8366,8367,8368,8968,8970,85236,121504,255324,653604	FOS,FOSB,GNG10,H2AC8,H2BC5,H2AC6,H2AC20,H2BC15,H2BC14,H2BC9,H2BC17,H2BC21,H3C1,H3C4,H3C3,H3C6,H3C11,H3C8,H3C10,H4C4,H4C8,H4C2,H4C5,H4C13,H3C7,H2BC11,H2BC12,H4-16,EPGN,H3C13
1_Member	Reactome Gene Sets	R-HSA-1474165	Reproduction	-27.045	-24.3993	26/143	3012,3017,8334,8338,8341,8342,8345,8348,8349,8350,8351,8352,8353,8354,8355,8357,8360,8365,8366,8367,8368,8968,8970,85236,121504,653604	H2AC8,H2BC5,H2AC6,H2AC20,H2BC15,H2BC14,H2BC9,H2BC17,H2BC21,H3C1,H3C4,H3C3,H3C6,H3C11,H3C8,H3C10,H4C4,H4C8,H4C2,H4C5,H4C13,H3C7,H2BC11,H2BC12,H4-16,H3C13
1_Member	GO Biological Processes	GO:0031497	chromatin assembly	-26.9821	-24.3446	28/182	3006,3007,3008,3009,3017,8341,8342,8345,8348,8349,8350,8351,8352,8353,8354,8355,8357,8360,8365,8366,8367,8368,8968,8970,85236,121504,440689,653604	H1-2,H1-3,H1-4,H1-5,H2BC5,H2BC15,H2BC14,H2BC9,H2BC17,H2BC21,H3C1,H3C4,H3C3,H3C6,H3C11,H3C8,H3C10,H4C4,H4C8,H4C2,H4C5,H4C13,H3C7,H2BC11,H2BC12,H4-16,H2BC18,H3C13
1_Member	Reactome Gene Sets	R-HSA-2559586	DNA Damage/Telomere Stress Induced Senescence	-25.5524	-22.9231	21/80	3006,3007,3008,3009,3012,3017,8334,8338,8341,8342,8345,8348,8349,8360,8365,8366,8367,8368,8970,85236,121504	H1-2,H1-3,H1-4,H1-5,H2AC8,H2BC5,H2AC6,H2AC20,H2BC15,H2BC14,H2BC9,H2BC17,H2BC21,H4C4,H4C8,H4C2,H4C5,H4C13,H2BC11,H2BC12,H4-16
1_Member	GO Biological Processes	GO:0006333	chromatin assembly or disassembly	-25.3711	-22.7498	28/207	3006,3007,3008,3009,3017,8341,8342,8345,8348,8349,8350,8351,8352,8353,8354,8355,8357,8360,8365,8366,8367,8368,8968,8970,85236,121504,440689,653604	H1-2,H1-3,H1-4,H1-5,H2BC5,H2BC15,H2BC14,H2BC9,H2BC17,H2BC21,H3C1,H3C4,H3C3,H3C6,H3C11,H3C8,H3C10,H4C4,H4C8,H4C2,H4C5,H4C13,H3C7,H2BC11,H2BC12,H4-16,H2BC18,H3C13
1_Member	GO Biological Processes	GO:0065004	protein-DNA complex assembly	-25.1927	-22.5792	28/210	3006,3007,3008,3009,3017,8341,8342,8345,8348,8349,8350,8351,8352,8353,8354,8355,8357,8360,8365,8366,8367,8368,8968,8970,85236,121504,440689,653604	H1-2,H1-3,H1-4,H1-5,H2BC5,H2BC15,H2BC14,H2BC9,H2BC17,H2BC21,H3C1,H3C4,H3C3,H3C6,H3C11,H3C8,H3C10,H4C4,H4C8,H4C2,H4C5,H4C13,H3C7,H2BC11,H2BC12,H4-16,H2BC18,H3C13
1_Member	Reactome Gene Sets	R-HSA-9006931	Signaling by Nuclear Receptors	-24.4871	-21.8813	31/299	2353,2354,2790,3012,3017,8334,8338,8341,8342,8345,8348,8349,8350,8351,8352,8353,8354,8355,8357,8360,8365,8366,8367,8368,8968,8970,9619,85236,121504,255324,653604	FOS,FOSB,GNG10,H2AC8,H2BC5,H2AC6,H2AC20,H2BC15,H2BC14,H2BC9,H2BC17,H2BC21,H3C1,H3C4,H3C3,H3C6,H3C11,H3C8,H3C10,H4C4,H4C8,H4C2,H4C5,H4C13,H3C7,H2BC11,ABCG1,H2BC12,H4-16,EPGN,H3C13
1_Member	GO Biological Processes	GO:0006323	DNA packaging	-24.1254	-21.5272	28/229	3006,3007,3008,3009,3017,8341,8342,8345,8348,8349,8350,8351,8352,8353,8354,8355,8357,8360,8365,8366,8367,8368,8968,8970,85236,121504,440689,653604	H1-2,H1-3,H1-4,H1-5,H2BC5,H2BC15,H2BC14,H2BC9,H2BC17,H2BC21,H3C1,H3C4,H3C3,H3C6,H3C11,H3C8,H3C10,H4C4,H4C8,H4C2,H4C5,H4C13,H3C7,H2BC11,H2BC12,H4-16,H2BC18,H3C13
1_Member	Reactome Gene Sets	R-HSA-157118	Signaling by NOTCH	-23.7571	-21.1663	28/236	182,3012,3017,3714,8334,8338,8341,8342,8345,8348,8349,8350,8351,8352,8353,8354,8355,8357,8360,8365,8366,8367,8368,8968,8970,85236,121504,653604	JAG1,H2AC8,H2BC5,JAG2,H2AC6,H2AC20,H2BC15,H2BC14,H2BC9,H2BC17,H2BC21,H3C1,H3C4,H3C3,H3C6,H3C11,H3C8,H3C10,H4C4,H4C8,H4C2,H4C5,H4C13,H3C7,H2BC11,H2BC12,H4-16,H3C13
1_Member	Reactome Gene Sets	R-HSA-2262752	Cellular responses to stress	-23.378	-20.7944	43/757	571,2353,2936,3006,3007,3008,3009,3012,3017,3490,3569,3576,4193,4306,6170,6171,6218,6228,8334,8338,8341,8342,8345,8348,8349,8350,8351,8352,8353,8354,8355,8357,8360,8365,8366,8367,8368,8968,8970,85236,121504,653604,729438	BACH1,FOS,GSR,H1-2,H1-3,H1-4,H1-5,H2AC8,H2BC5,IGFBP7,IL6,CXCL8,MDM2,NR3C2,RPL39,RPL41,RPS17,RPS23,H2AC6,H2AC20,H2BC15,H2BC14,H2BC9,H2BC17,H2BC21,H3C1,H3C4,H3C3,H3C6,H3C11,H3C8,H3C10,H4C4,H4C8,H4C2,H4C5,H4C13,H3C7,H2BC11,H2BC12,H4-16,H3C13,CASTOR2
1_Member	Reactome Gene Sets	R-HSA-195721	Signaling by WNT	-23.1036	-20.5273	31/332	2790,3012,3017,3708,4919,8322,8334,8338,8341,8342,8345,8348,8349,8350,8351,8352,8353,8354,8355,8357,8360,8365,8366,8367,8368,8968,8970,57154,85236,121504,653604	GNG10,H2AC8,H2BC5,ITPR1,ROR1,FZD4,H2AC6,H2AC20,H2BC15,H2BC14,H2BC9,H2BC17,H2BC21,H3C1,H3C4,H3C3,H3C6,H3C11,H3C8,H3C10,H4C4,H4C8,H4C2,H4C5,H4C13,H3C7,H2BC11,SMURF1,H2BC12,H4-16,H3C13
1_Member	Reactome Gene Sets	R-HSA-8953897	Cellular responses to stimuli	-23.0659	-20.4966	43/771	571,2353,2936,3006,3007,3008,3009,3012,3017,3490,3569,3576,4193,4306,6170,6171,6218,6228,8334,8338,8341,8342,8345,8348,8349,8350,8351,8352,8353,8354,8355,8357,8360,8365,8366,8367,8368,8968,8970,85236,121504,653604,729438	BACH1,FOS,GSR,H1-2,H1-3,H1-4,H1-5,H2AC8,H2BC5,IGFBP7,IL6,CXCL8,MDM2,NR3C2,RPL39,RPL41,RPS17,RPS23,H2AC6,H2AC20,H2BC15,H2BC14,H2BC9,H2BC17,H2BC21,H3C1,H3C4,H3C3,H3C6,H3C11,H3C8,H3C10,H4C4,H4C8,H4C2,H4C5,H4C13,H3C7,H2BC11,H2BC12,H4-16,H3C13,CASTOR2
1_Member	GO Biological Processes	GO:0071824	protein-DNA complex subunit organization	-23.0561	-20.4937	28/250	3006,3007,3008,3009,3017,8341,8342,8345,8348,8349,8350,8351,8352,8353,8354,8355,8357,8360,8365,8366,8367,8368,8968,8970,85236,121504,440689,653604	H1-2,H1-3,H1-4,H1-5,H2BC5,H2BC15,H2BC14,H2BC9,H2BC17,H2BC21,H3C1,H3C4,H3C3,H3C6,H3C11,H3C8,H3C10,H4C4,H4C8,H4C2,H4C5,H4C13,H3C7,H2BC11,H2BC12,H4-16,H2BC18,H3C13
1_Member	Reactome Gene Sets	R-HSA-201681	TCF dependent signaling in response to WNT	-22.6372	-20.0817	27/233	3012,3017,8322,8334,8338,8341,8342,8345,8348,8349,8350,8351,8352,8353,8354,8355,8357,8360,8365,8366,8367,8368,8968,8970,85236,121504,653604	H2AC8,H2BC5,FZD4,H2AC6,H2AC20,H2BC15,H2BC14,H2BC9,H2BC17,H2BC21,H3C1,H3C4,H3C3,H3C6,H3C11,H3C8,H3C10,H4C4,H4C8,H4C2,H4C5,H4C13,H3C7,H2BC11,H2BC12,H4-16,H3C13
1_Member	Reactome Gene Sets	R-HSA-171306	Packaging Of Telomere Ends	-22.6221	-20.0733	17/52	3012,3017,8334,8338,8341,8342,8345,8348,8349,8360,8365,8366,8367,8368,8970,85236,121504	H2AC8,H2BC5,H2AC6,H2AC20,H2BC15,H2BC14,H2BC9,H2BC17,H2BC21,H4C4,H4C8,H4C2,H4C5,H4C13,H2BC11,H2BC12,H4-16
1_Member	Reactome Gene Sets	R-HSA-8878171	Transcriptional regulation by RUNX1	-22.3393	-19.7972	27/239	3012,3017,8334,8338,8341,8342,8345,8348,8349,8350,8351,8352,8353,8354,8355,8357,8360,8365,8366,8367,8368,8968,8970,84333,85236,121504,653604	H2AC8,H2BC5,H2AC6,H2AC20,H2BC15,H2BC14,H2BC9,H2BC17,H2BC21,H3C1,H3C4,H3C3,H3C6,H3C11,H3C8,H3C10,H4C4,H4C8,H4C2,H4C5,H4C13,H3C7,H2BC11,PCGF5,H2BC12,H4-16,H3C13
1_Member	Reactome Gene Sets	R-HSA-110330	Recognition and association of DNA glycosylase with site containing an affected purine	-21.9846	-19.4617	17/56	3012,3017,8334,8338,8341,8342,8345,8348,8349,8360,8365,8366,8367,8368,8970,85236,121504	H2AC8,H2BC5,H2AC6,H2AC20,H2BC15,H2BC14,H2BC9,H2BC17,H2BC21,H4C4,H4C8,H4C2,H4C5,H4C13,H2BC11,H2BC12,H4-16
1_Member	Reactome Gene Sets	R-HSA-110331	Cleavage of the damaged purine	-21.9846	-19.4617	17/56	3012,3017,8334,8338,8341,8342,8345,8348,8349,8360,8365,8366,8367,8368,8970,85236,121504	H2AC8,H2BC5,H2AC6,H2AC20,H2BC15,H2BC14,H2BC9,H2BC17,H2BC21,H4C4,H4C8,H4C2,H4C5,H4C13,H2BC11,H2BC12,H4-16
1_Member	Reactome Gene Sets	R-HSA-73927	Depurination	-21.9846	-19.4617	17/56	3012,3017,8334,8338,8341,8342,8345,8348,8349,8360,8365,8366,8367,8368,8970,85236,121504	H2AC8,H2BC5,H2AC6,H2AC20,H2BC15,H2BC14,H2BC9,H2BC17,H2BC21,H4C4,H4C8,H4C2,H4C5,H4C13,H2BC11,H2BC12,H4-16
1_Member	Reactome Gene Sets	R-HSA-110328	Recognition and association of DNA glycosylase with site containing an affected pyrimidine	-21.2613	-18.7569	17/61	3012,3017,8334,8338,8341,8342,8345,8348,8349,8360,8365,8366,8367,8368,8970,85236,121504	H2AC8,H2BC5,H2AC6,H2AC20,H2BC15,H2BC14,H2BC9,H2BC17,H2BC21,H4C4,H4C8,H4C2,H4C5,H4C13,H2BC11,H2BC12,H4-16
1_Member	Reactome Gene Sets	R-HSA-110329	Cleavage of the damaged pyrimidine	-21.2613	-18.7569	17/61	3012,3017,8334,8338,8341,8342,8345,8348,8349,8360,8365,8366,8367,8368,8970,85236,121504	H2AC8,H2BC5,H2AC6,H2AC20,H2BC15,H2BC14,H2BC9,H2BC17,H2BC21,H4C4,H4C8,H4C2,H4C5,H4C13,H2BC11,H2BC12,H4-16
1_Member	Reactome Gene Sets	R-HSA-73928	Depyrimidination	-21.2613	-18.7569	17/61	3012,3017,8334,8338,8341,8342,8345,8348,8349,8360,8365,8366,8367,8368,8970,85236,121504	H2AC8,H2BC5,H2AC6,H2AC20,H2BC15,H2BC14,H2BC9,H2BC17,H2BC21,H4C4,H4C8,H4C2,H4C5,H4C13,H2BC11,H2BC12,H4-16
1_Member	Reactome Gene Sets	R-HSA-73929	Base-Excision Repair, AP Site Formation	-20.9917	-18.4933	17/63	3012,3017,8334,8338,8341,8342,8345,8348,8349,8360,8365,8366,8367,8368,8970,85236,121504	H2AC8,H2BC5,H2AC6,H2AC20,H2BC15,H2BC14,H2BC9,H2BC17,H2BC21,H4C4,H4C8,H4C2,H4C5,H4C13,H2BC11,H2BC12,H4-16
1_Member	GO Biological Processes	GO:0006335	DNA replication-dependent nucleosome assembly	-20.8687	-18.3821	14/32	8350,8351,8352,8353,8354,8355,8357,8360,8365,8366,8367,8368,8968,121504	H3C1,H3C4,H3C3,H3C6,H3C11,H3C8,H3C10,H4C4,H4C8,H4C2,H4C5,H4C13,H3C7,H4-16
1_Member	GO Biological Processes	GO:0034723	DNA replication-dependent nucleosome organization	-20.8687	-18.3821	14/32	8350,8351,8352,8353,8354,8355,8357,8360,8365,8366,8367,8368,8968,121504	H3C1,H3C4,H3C3,H3C6,H3C11,H3C8,H3C10,H4C4,H4C8,H4C2,H4C5,H4C13,H3C7,H4-16
1_Member	Reactome Gene Sets	R-HSA-9670095	Inhibition of DNA recombination at telomere	-20.3599	-17.879	17/68	3012,3017,8334,8338,8341,8342,8345,8348,8349,8360,8365,8366,8367,8368,8970,85236,121504	H2AC8,H2BC5,H2AC6,H2AC20,H2BC15,H2BC14,H2BC9,H2BC17,H2BC21,H4C4,H4C8,H4C2,H4C5,H4C13,H2BC11,H2BC12,H4-16
1_Member	GO Biological Processes	GO:0071103	DNA conformation change	-20.1469	-17.6717	28/319	3006,3007,3008,3009,3017,8341,8342,8345,8348,8349,8350,8351,8352,8353,8354,8355,8357,8360,8365,8366,8367,8368,8968,8970,85236,121504,440689,653604	H1-2,H1-3,H1-4,H1-5,H2BC5,H2BC15,H2BC14,H2BC9,H2BC17,H2BC21,H3C1,H3C4,H3C3,H3C6,H3C11,H3C8,H3C10,H4C4,H4C8,H4C2,H4C5,H4C13,H3C7,H2BC11,H2BC12,H4-16,H2BC18,H3C13
1_Member	Reactome Gene Sets	R-HSA-606279	Deposition of new CENPA-containing nucleosomes at the centromere	-19.6703	-17.2063	17/74	3012,3017,8334,8338,8341,8342,8345,8348,8349,8360,8365,8366,8367,8368,8970,85236,121504	H2AC8,H2BC5,H2AC6,H2AC20,H2BC15,H2BC14,H2BC9,H2BC17,H2BC21,H4C4,H4C8,H4C2,H4C5,H4C13,H2BC11,H2BC12,H4-16
1_Member	Reactome Gene Sets	R-HSA-774815	Nucleosome assembly	-19.6703	-17.2063	17/74	3012,3017,8334,8338,8341,8342,8345,8348,8349,8360,8365,8366,8367,8368,8970,85236,121504	H2AC8,H2BC5,H2AC6,H2AC20,H2BC15,H2BC14,H2BC9,H2BC17,H2BC21,H4C4,H4C8,H4C2,H4C5,H4C13,H2BC11,H2BC12,H4-16
1_Member	Reactome Gene Sets	R-HSA-3214842	HDMs demethylate histones	-19.3632	-16.9046	15/50	8350,8351,8352,8353,8354,8355,8357,8360,8365,8366,8367,8368,8968,121504,653604	H3C1,H3C4,H3C3,H3C6,H3C11,H3C8,H3C10,H4C4,H4C8,H4C2,H4C5,H4C13,H3C7,H4-16,H3C13
1_Member	Reactome Gene Sets	R-HSA-1221632	Meiotic synapsis	-19.1438	-16.6906	17/79	3012,3017,8334,8338,8341,8342,8345,8348,8349,8360,8365,8366,8367,8368,8970,85236,121504	H2AC8,H2BC5,H2AC6,H2AC20,H2BC15,H2BC14,H2BC9,H2BC17,H2BC21,H4C4,H4C8,H4C2,H4C5,H4C13,H2BC11,H2BC12,H4-16
1_Member	Reactome Gene Sets	R-HSA-195258	RHO GTPase Effectors	-18.7444	-16.2965	27/327	388,3012,3017,8334,8338,8341,8342,8345,8348,8349,8350,8351,8352,8353,8354,8355,8357,8360,8365,8366,8367,8368,8968,8970,85236,121504,653604	RHOB,H2AC8,H2BC5,H2AC6,H2AC20,H2BC15,H2BC14,H2BC9,H2BC17,H2BC21,H3C1,H3C4,H3C3,H3C6,H3C11,H3C8,H3C10,H4C4,H4C8,H4C2,H4C5,H4C13,H3C7,H2BC11,H2BC12,H4-16,H3C13
1_Member	Reactome Gene Sets	R-HSA-3214841	PKMTs methylate histone lysines	-18.3947	-15.952	16/71	8350,8351,8352,8353,8354,8355,8357,8360,8365,8366,8367,8368,8968,63976,121504,653604	H3C1,H3C4,H3C3,H3C6,H3C11,H3C8,H3C10,H4C4,H4C8,H4C2,H4C5,H4C13,H3C7,PRDM16,H4-16,H3C13
1_Member	Reactome Gene Sets	R-HSA-73884	Base Excision Repair	-17.9373	-15.4999	17/92	3012,3017,8334,8338,8341,8342,8345,8348,8349,8360,8365,8366,8367,8368,8970,85236,121504	H2AC8,H2BC5,H2AC6,H2AC20,H2BC15,H2BC14,H2BC9,H2BC17,H2BC21,H4C4,H4C8,H4C2,H4C5,H4C13,H2BC11,H2BC12,H4-16
1_Member	WikiPathways	WP2369	Histone modifications	-16.9189	-14.4866	15/70	8350,8351,8352,8353,8354,8355,8357,8360,8365,8366,8367,8368,8968,121504,653604	H3C1,H3C4,H3C3,H3C6,H3C11,H3C8,H3C10,H4C4,H4C8,H4C2,H4C5,H4C13,H3C7,H4-16,H3C13
1_Member	Reactome Gene Sets	R-HSA-157579	Telomere Maintenance	-16.3499	-13.9227	17/113	3012,3017,8334,8338,8341,8342,8345,8348,8349,8360,8365,8366,8367,8368,8970,85236,121504	H2AC8,H2BC5,H2AC6,H2AC20,H2BC15,H2BC14,H2BC9,H2BC17,H2BC21,H4C4,H4C8,H4C2,H4C5,H4C13,H2BC11,H2BC12,H4-16
1_Member	GO Biological Processes	GO:0060968	regulation of gene silencing	-15.8154	-13.4031	15/82	3006,3007,3008,3009,3569,6023,8350,8351,8352,8353,8354,8355,8357,8968,10984	H1-2,H1-3,H1-4,H1-5,IL6,RMRP,H3C1,H3C4,H3C3,H3C6,H3C11,H3C8,H3C10,H3C7,KCNQ1OT1
1_Member	Reactome Gene Sets	R-HSA-5693571	Nonhomologous End-Joining (NHEJ)	-15.4668	-13.0642	14/69	3017,8341,8342,8345,8348,8349,8360,8365,8366,8367,8368,8970,85236,121504	H2BC5,H2BC15,H2BC14,H2BC9,H2BC17,H2BC21,H4C4,H4C8,H4C2,H4C5,H4C13,H2BC11,H2BC12,H4-16
1_Member	Reactome Gene Sets	R-HSA-68886	M Phase	-15.0559	-12.658	26/418	3012,3017,8334,8338,8341,8342,8345,8348,8349,8350,8351,8352,8353,8354,8355,8357,8360,8365,8366,8367,8368,8968,8970,85236,121504,653604	H2AC8,H2BC5,H2AC6,H2AC20,H2BC15,H2BC14,H2BC9,H2BC17,H2BC21,H3C1,H3C4,H3C3,H3C6,H3C11,H3C8,H3C10,H4C4,H4C8,H4C2,H4C5,H4C13,H3C7,H2BC11,H2BC12,H4-16,H3C13
1_Member	Reactome Gene Sets	R-HSA-5693565	Recruitment and ATM-mediated phosphorylation of repair and signaling proteins at DNA double strand breaks	-14.7564	-12.3632	14/77	3017,8341,8342,8345,8348,8349,8360,8365,8366,8367,8368,8970,85236,121504	H2BC5,H2BC15,H2BC14,H2BC9,H2BC17,H2BC21,H4C4,H4C8,H4C2,H4C5,H4C13,H2BC11,H2BC12,H4-16
1_Member	Reactome Gene Sets	R-HSA-73886	Chromosome Maintenance	-14.6877	-12.2991	17/141	3012,3017,8334,8338,8341,8342,8345,8348,8349,8360,8365,8366,8367,8368,8970,85236,121504	H2AC8,H2BC5,H2AC6,H2AC20,H2BC15,H2BC14,H2BC9,H2BC17,H2BC21,H4C4,H4C8,H4C2,H4C5,H4C13,H2BC11,H2BC12,H4-16
1_Member	Reactome Gene Sets	R-HSA-5693606	DNA Double Strand Break Response	-14.6736	-12.2896	14/78	3017,8341,8342,8345,8348,8349,8360,8365,8366,8367,8368,8970,85236,121504	H2BC5,H2BC15,H2BC14,H2BC9,H2BC17,H2BC21,H4C4,H4C8,H4C2,H4C5,H4C13,H2BC11,H2BC12,H4-16
1_Member	Reactome Gene Sets	R-HSA-194315	Signaling by Rho GTPases	-14.528	-12.1486	32/707	182,388,3012,3017,6711,8334,8338,8341,8342,8345,8348,8349,8350,8351,8352,8353,8354,8355,8357,8360,8365,8366,8367,8368,8654,8968,8970,10395,85236,121504,121512,653604	JAG1,RHOB,H2AC8,H2BC5,SPTBN1,H2AC6,H2AC20,H2BC15,H2BC14,H2BC9,H2BC17,H2BC21,H3C1,H3C4,H3C3,H3C6,H3C11,H3C8,H3C10,H4C4,H4C8,H4C2,H4C5,H4C13,PDE5A,H3C7,H2BC11,DLC1,H2BC12,H4-16,FGD4,H3C13
1_Member	Reactome Gene Sets	R-HSA-9716542	Signaling by Rho GTPases, Miro GTPases and RHOBTB3	-14.2578	-11.8829	32/723	182,388,3012,3017,6711,8334,8338,8341,8342,8345,8348,8349,8350,8351,8352,8353,8354,8355,8357,8360,8365,8366,8367,8368,8654,8968,8970,10395,85236,121504,121512,653604	JAG1,RHOB,H2AC8,H2BC5,SPTBN1,H2AC6,H2AC20,H2BC15,H2BC14,H2BC9,H2BC17,H2BC21,H3C1,H3C4,H3C3,H3C6,H3C11,H3C8,H3C10,H4C4,H4C8,H4C2,H4C5,H4C13,PDE5A,H3C7,H2BC11,DLC1,H2BC12,H4-16,FGD4,H3C13
1_Member	Reactome Gene Sets	R-HSA-69473	G2/M DNA damage checkpoint	-13.4256	-11.0596	14/95	3017,8341,8342,8345,8348,8349,8360,8365,8366,8367,8368,8970,85236,121504	H2BC5,H2BC15,H2BC14,H2BC9,H2BC17,H2BC21,H4C4,H4C8,H4C2,H4C5,H4C13,H2BC11,H2BC12,H4-16
1_Member	KEGG Pathway	ko05203	Viral carcinogenesis	-13.2344	-10.8829	18/201	718,3017,3105,4193,8341,8342,8345,8348,8349,8360,8365,8366,8367,8368,8970,85236,121504,440689	C3,H2BC5,HLA-A,MDM2,H2BC15,H2BC14,H2BC9,H2BC17,H2BC21,H4C4,H4C8,H4C2,H4C5,H4C13,H2BC11,H2BC12,H4-16,H2BC18
1_Member	Reactome Gene Sets	R-HSA-5693607	Processing of DNA double-strand break ends	-13.2318	-10.8829	14/98	3017,8341,8342,8345,8348,8349,8360,8365,8366,8367,8368,8970,85236,121504	H2BC5,H2BC15,H2BC14,H2BC9,H2BC17,H2BC21,H4C4,H4C8,H4C2,H4C5,H4C13,H2BC11,H2BC12,H4-16
1_Member	KEGG Pathway	hsa05203	Viral carcinogenesis	-12.8689	-10.5284	18/211	718,3017,3105,4193,8341,8342,8345,8348,8349,8360,8365,8366,8367,8368,8970,85236,121504,440689	C3,H2BC5,HLA-A,MDM2,H2BC15,H2BC14,H2BC9,H2BC17,H2BC21,H4C4,H4C8,H4C2,H4C5,H4C13,H2BC11,H2BC12,H4-16,H2BC18
1_Member	Reactome Gene Sets	R-HSA-1266695	Interleukin-7 signaling	-12.6969	-10.3605	10/36	3082,8350,8351,8352,8353,8354,8355,8357,8968,653604	HGF,H3C1,H3C4,H3C3,H3C6,H3C11,H3C8,H3C10,H3C7,H3C13
1_Member	Reactome Gene Sets	R-HSA-69278	Cell Cycle, Mitotic	-12.0776	-9.74934	26/561	3012,3017,8334,8338,8341,8342,8345,8348,8349,8350,8351,8352,8353,8354,8355,8357,8360,8365,8366,8367,8368,8968,8970,85236,121504,653604	H2AC8,H2BC5,H2AC6,H2AC20,H2BC15,H2BC14,H2BC9,H2BC17,H2BC21,H3C1,H3C4,H3C3,H3C6,H3C11,H3C8,H3C10,H4C4,H4C8,H4C2,H4C5,H4C13,H3C7,H2BC11,H2BC12,H4-16,H3C13
1_Member	GO Biological Processes	GO:0032200	telomere organization	-11.4426	-9.11831	15/159	7012,8350,8351,8352,8353,8354,8355,8357,8360,8365,8366,8367,8368,8968,121504	TERC,H3C1,H3C4,H3C3,H3C6,H3C11,H3C8,H3C10,H4C4,H4C8,H4C2,H4C5,H4C13,H3C7,H4-16
1_Member	Reactome Gene Sets	R-HSA-5693567	HDR through Homologous Recombination (HRR) or Single Strand Annealing (SSA)	-11.4125	-9.09223	14/132	3017,8341,8342,8345,8348,8349,8360,8365,8366,8367,8368,8970,85236,121504	H2BC5,H2BC15,H2BC14,H2BC9,H2BC17,H2BC21,H4C4,H4C8,H4C2,H4C5,H4C13,H2BC11,H2BC12,H4-16
1_Member	Reactome Gene Sets	R-HSA-5693538	Homology Directed Repair	-11.1468	-8.8304	14/138	3017,8341,8342,8345,8348,8349,8360,8365,8366,8367,8368,8970,85236,121504	H2BC5,H2BC15,H2BC14,H2BC9,H2BC17,H2BC21,H4C4,H4C8,H4C2,H4C5,H4C13,H2BC11,H2BC12,H4-16
1_Member	Reactome Gene Sets	R-HSA-1640170	Cell Cycle	-10.8015	-8.48897	27/692	3012,3017,4193,8334,8338,8341,8342,8345,8348,8349,8350,8351,8352,8353,8354,8355,8357,8360,8365,8366,8367,8368,8968,8970,85236,121504,653604	H2AC8,H2BC5,MDM2,H2AC6,H2AC20,H2BC15,H2BC14,H2BC9,H2BC17,H2BC21,H3C1,H3C4,H3C3,H3C6,H3C11,H3C8,H3C10,H4C4,H4C8,H4C2,H4C5,H4C13,H3C7,H2BC11,H2BC12,H4-16,H3C13
1_Member	WikiPathways	WP4553	FBXL10 enhancement of MAP/ERK signaling in diffuse large B-cell lymphoma	-10.7875	-8.47884	9/38	8350,8351,8352,8353,8354,8355,8357,8968,653604	H3C1,H3C4,H3C3,H3C6,H3C11,H3C8,H3C10,H3C7,H3C13
1_Member	WikiPathways	WP4320	Effect of progerin on genes involved in Hutchinson-Gilford progeria syndrome	-10.6766	-8.37176	9/39	8350,8351,8352,8353,8354,8355,8357,8968,653604	H3C1,H3C4,H3C3,H3C6,H3C11,H3C8,H3C10,H3C7,H3C13
1_Member	Reactome Gene Sets	R-HSA-5693532	DNA Double-Strand Break Repair	-10.0234	-7.72241	14/167	3017,8341,8342,8345,8348,8349,8360,8365,8366,8367,8368,8970,85236,121504	H2BC5,H2BC15,H2BC14,H2BC9,H2BC17,H2BC21,H4C4,H4C8,H4C2,H4C5,H4C13,H2BC11,H2BC12,H4-16
1_Member	Reactome Gene Sets	R-HSA-69481	G2/M Checkpoints	-9.98871	-7.69146	14/168	3017,8341,8342,8345,8348,8349,8360,8365,8366,8367,8368,8970,85236,121504	H2BC5,H2BC15,H2BC14,H2BC9,H2BC17,H2BC21,H4C4,H4C8,H4C2,H4C5,H4C13,H2BC11,H2BC12,H4-16
1_Member	Reactome Gene Sets	R-HSA-73894	DNA Repair	-9.5145	-7.22098	18/335	2074,3012,3017,8334,8338,8341,8342,8345,8348,8349,8360,8365,8366,8367,8368,8970,85236,121504	ERCC6,H2AC8,H2BC5,H2AC6,H2AC20,H2BC15,H2BC14,H2BC9,H2BC17,H2BC21,H4C4,H4C8,H4C2,H4C5,H4C13,H2BC11,H2BC12,H4-16
1_Member	GO Biological Processes	GO:0016458	gene silencing	-8.97343	-6.6836	26/778	3006,3007,3008,3009,3012,3569,5936,6023,8329,8330,8332,8334,8336,8338,8350,8351,8352,8353,8354,8355,8357,8968,8969,10984,85235,317772	H1-2,H1-3,H1-4,H1-5,H2AC8,IL6,RBM4,RMRP,H2AC13,H2AC15,H2AC16,H2AC6,H2AC17,H2AC20,H3C1,H3C4,H3C3,H3C6,H3C11,H3C8,H3C10,H3C7,H2AC11,KCNQ1OT1,H2AC12,H2AC21
1_Member	Reactome Gene Sets	R-HSA-69620	Cell Cycle Checkpoints	-7.71586	-5.43693	15/294	3017,4193,8341,8342,8345,8348,8349,8360,8365,8366,8367,8368,8970,85236,121504	H2BC5,MDM2,H2BC15,H2BC14,H2BC9,H2BC17,H2BC21,H4C4,H4C8,H4C2,H4C5,H4C13,H2BC11,H2BC12,H4-16
1_Member	Reactome Gene Sets	R-HSA-8866654	E3 ubiquitin ligases ubiquitinate target proteins	-7.6102	-5.3384	8/59	3017,3105,8341,8342,8345,8348,8970,85236	H2BC5,HLA-A,H2BC15,H2BC14,H2BC9,H2BC17,H2BC11,H2BC12
1_Member	KEGG Pathway	ko05202	Transcriptional misregulation in cancer	-7.54627	-5.27799	12/180	3569,3576,4193,8350,8351,8352,8353,8354,8355,8357,8968,653604	IL6,CXCL8,MDM2,H3C1,H3C4,H3C3,H3C6,H3C11,H3C8,H3C10,H3C7,H3C13
1_Member	KEGG Pathway	hsa05202	Transcriptional misregulation in cancer	-6.94803	-4.68323	12/204	3569,3576,4193,8350,8351,8352,8353,8354,8355,8357,8968,653604	IL6,CXCL8,MDM2,H3C1,H3C4,H3C3,H3C6,H3C11,H3C8,H3C10,H3C7,H3C13
1_Member	Reactome Gene Sets	R-HSA-449147	Signaling by Interleukins	-6.60701	-4.3491	17/462	2353,2920,3082,3553,3569,3576,3976,7335,8350,8351,8352,8353,8354,8355,8357,8968,653604	FOS,CXCL2,HGF,IL1B,IL6,CXCL8,LIF,UBE2V1,H3C1,H3C4,H3C3,H3C6,H3C11,H3C8,H3C10,H3C7,H3C13
1_Member	Reactome Gene Sets	R-HSA-8852135	Protein ubiquitination	-6.59966	-4.34516	8/79	3017,3105,8341,8342,8345,8348,8970,85236	H2BC5,HLA-A,H2BC15,H2BC14,H2BC9,H2BC17,H2BC11,H2BC12
1_Member	Reactome Gene Sets	R-HSA-983231	Factors involved in megakaryocyte development and platelet production	-5.92938	-3.69478	10/168	2627,8350,8351,8352,8353,8354,8355,8357,8968,653604	GATA6,H3C1,H3C4,H3C3,H3C6,H3C11,H3C8,H3C10,H3C7,H3C13
1_Member	Reactome Gene Sets	R-HSA-109582	Hemostasis	-5.47682	-3.26124	18/621	388,2149,2627,2790,3082,3708,5552,8350,8351,8352,8353,8354,8355,8357,8654,8968,9749,653604	RHOB,F2R,GATA6,GNG10,HGF,ITPR1,SRGN,H3C1,H3C4,H3C3,H3C6,H3C11,H3C8,H3C10,PDE5A,H3C7,PHACTR2,H3C13
1_Member	Reactome Gene Sets	R-HSA-1280215	Cytokine Signaling in Immune system	-5.20977	-3.00035	19/715	2353,2920,3082,3105,3429,3553,3569,3576,3976,7335,8350,8351,8352,8353,8354,8355,8357,8968,653604	FOS,CXCL2,HGF,HLA-A,IFI27,IL1B,IL6,CXCL8,LIF,UBE2V1,H3C1,H3C4,H3C3,H3C6,H3C11,H3C8,H3C10,H3C7,H3C13
2_Summary	GO Biological Processes	GO:0006342	chromatin silencing	-16.3421	-13.9199	15/76	3006,3007,3008,3009,3012,8329,8330,8332,8334,8336,8338,8969,10984,85235,317772,3017,4193,5728,8341,8342,8345,8348,8349,8970,85236,440689,84333	H1-2,H1-3,H1-4,H1-5,H2AC8,H2AC13,H2AC15,H2AC16,H2AC6,H2AC17,H2AC20,H2AC11,KCNQ1OT1,H2AC12,H2AC21,H2BC5,MDM2,PTEN,H2BC15,H2BC14,H2BC9,H2BC17,H2BC21,H2BC11,H2BC12,H2BC18,PCGF5
2_Member	GO Biological Processes	GO:0006342	chromatin silencing	-16.3421	-13.9199	15/76	3006,3007,3008,3009,3012,8329,8330,8332,8334,8336,8338,8969,10984,85235,317772	H1-2,H1-3,H1-4,H1-5,H2AC8,H2AC13,H2AC15,H2AC16,H2AC6,H2AC17,H2AC20,H2AC11,KCNQ1OT1,H2AC12,H2AC21
2_Member	Reactome Gene Sets	R-HSA-5689880	Ub-specific processing proteases	-15.9297	-13.5124	21/220	3012,3017,4193,5728,8329,8330,8332,8334,8336,8338,8341,8342,8345,8348,8349,8969,8970,85235,85236,317772,440689	H2AC8,H2BC5,MDM2,PTEN,H2AC13,H2AC15,H2AC16,H2AC6,H2AC17,H2AC20,H2BC15,H2BC14,H2BC9,H2BC17,H2BC21,H2AC11,H2BC11,H2AC12,H2BC12,H2AC21,H2BC18
2_Member	GO Biological Processes	GO:0045814	negative regulation of gene expression, epigenetic	-15.4882	-13.0807	15/86	3006,3007,3008,3009,3012,8329,8330,8332,8334,8336,8338,8969,10984,85235,317772	H1-2,H1-3,H1-4,H1-5,H2AC8,H2AC13,H2AC15,H2AC16,H2AC6,H2AC17,H2AC20,H2AC11,KCNQ1OT1,H2AC12,H2AC21
2_Member	GO Biological Processes	GO:0097549	chromatin organization involved in negative regulation of transcription	-13.6518	-11.2813	15/113	3006,3007,3008,3009,3012,8329,8330,8332,8334,8336,8338,8969,10984,85235,317772	H1-2,H1-3,H1-4,H1-5,H2AC8,H2AC13,H2AC15,H2AC16,H2AC6,H2AC17,H2AC20,H2AC11,KCNQ1OT1,H2AC12,H2AC21
2_Member	GO Biological Processes	GO:0040029	regulation of gene expression, epigenetic	-13.3837	-11.022	16/142	3006,3007,3008,3009,3012,8329,8330,8332,8334,8336,8338,8969,10984,84333,85235,317772	H1-2,H1-3,H1-4,H1-5,H2AC8,H2AC13,H2AC15,H2AC16,H2AC6,H2AC17,H2AC20,H2AC11,KCNQ1OT1,PCGF5,H2AC12,H2AC21
2_Member	Reactome Gene Sets	R-HSA-5688426	Deubiquitination	-13.2858	-10.9285	21/298	3012,3017,4193,5728,8329,8330,8332,8334,8336,8338,8341,8342,8345,8348,8349,8969,8970,85235,85236,317772,440689	H2AC8,H2BC5,MDM2,PTEN,H2AC13,H2AC15,H2AC16,H2AC6,H2AC17,H2AC20,H2BC15,H2BC14,H2BC9,H2BC17,H2BC21,H2AC11,H2BC11,H2AC12,H2BC12,H2AC21,H2BC18
2_Member	GO Biological Processes	GO:0034401	chromatin organization involved in regulation of transcription	-12.9371	-10.5924	15/126	3006,3007,3008,3009,3012,8329,8330,8332,8334,8336,8338,8969,10984,85235,317772	H1-2,H1-3,H1-4,H1-5,H2AC8,H2AC13,H2AC15,H2AC16,H2AC6,H2AC17,H2AC20,H2AC11,KCNQ1OT1,H2AC12,H2AC21
2_Member	Reactome Gene Sets	R-HSA-5689901	Metalloprotease DUBs	-12.5631	-10.2308	10/37	3012,8329,8330,8332,8334,8336,8338,8969,85235,317772	H2AC8,H2AC13,H2AC15,H2AC16,H2AC6,H2AC17,H2AC20,H2AC11,H2AC12,H2AC21
2_Member	Reactome Gene Sets	R-HSA-5689603	UCH proteinases	-7.97492	-5.69239	10/102	3012,8329,8330,8332,8334,8336,8338,8969,85235,317772	H2AC8,H2AC13,H2AC15,H2AC16,H2AC6,H2AC17,H2AC20,H2AC11,H2AC12,H2AC21
3_Summary	GO Biological Processes	GO:0045653	negative regulation of megakaryocyte differentiation	-8.35683	-6.07067	6/18	8360,8365,8366,8367,8368,121504,130733,140685,182,2353,3976,10875,53342,149041,2202,3553,3569,5728,9619,25819,283659,2074,4193,4306,9076	H4C4,H4C8,H4C2,H4C5,H4C13,H4-16,TMEM178A,ZBTB46,JAG1,FOS,LIF,FGL2,IL17D,RC3H1,EFEMP1,IL1B,IL6,PTEN,ABCG1,NOCT,PRTG,ERCC6,MDM2,NR3C2,CLDN1
3_Member	GO Biological Processes	GO:0045653	negative regulation of megakaryocyte differentiation	-8.35683	-6.07067	6/18	8360,8365,8366,8367,8368,121504	H4C4,H4C8,H4C2,H4C5,H4C13,H4-16
3_Member	GO Biological Processes	GO:0006336	DNA replication-independent nucleosome assembly	-6.62502	-4.36368	6/33	8360,8365,8366,8367,8368,121504	H4C4,H4C8,H4C2,H4C5,H4C13,H4-16
3_Member	GO Biological Processes	GO:0034724	DNA replication-independent nucleosome organization	-6.54362	-4.2925	6/34	8360,8365,8366,8367,8368,121504	H4C4,H4C8,H4C2,H4C5,H4C13,H4-16
3_Member	GO Biological Processes	GO:0045652	regulation of megakaryocyte differentiation	-6.38861	-4.14085	6/36	8360,8365,8366,8367,8368,121504	H4C4,H4C8,H4C2,H4C5,H4C13,H4-16
3_Member	GO Biological Processes	GO:0045638	negative regulation of myeloid cell differentiation	-6.15973	-3.91529	8/90	8360,8365,8366,8367,8368,121504,130733,140685	H4C4,H4C8,H4C2,H4C5,H4C13,H4-16,TMEM178A,ZBTB46
3_Member	GO Biological Processes	GO:0045637	regulation of myeloid cell differentiation	-5.89676	-3.66539	11/211	182,2353,3976,8360,8365,8366,8367,8368,121504,130733,140685	JAG1,FOS,LIF,H4C4,H4C8,H4C2,H4C5,H4C13,H4-16,TMEM178A,ZBTB46
3_Member	GO Biological Processes	GO:1903706	regulation of hemopoiesis	-5.67594	-3.44777	14/370	182,2353,3976,8360,8365,8366,8367,8368,10875,53342,121504,130733,140685,149041	JAG1,FOS,LIF,H4C4,H4C8,H4C2,H4C5,H4C13,FGL2,IL17D,H4-16,TMEM178A,ZBTB46,RC3H1
3_Member	GO Biological Processes	GO:0030219	megakaryocyte differentiation	-5.17968	-2.97331	6/57	8360,8365,8366,8367,8368,121504	H4C4,H4C8,H4C2,H4C5,H4C13,H4-16
3_Member	GO Biological Processes	GO:0045596	negative regulation of cell differentiation	-4.91413	-2.73067	18/683	182,2202,3553,3569,5728,8360,8365,8366,8367,8368,9619,10875,25819,121504,130733,140685,149041,283659	JAG1,EFEMP1,IL1B,IL6,PTEN,H4C4,H4C8,H4C2,H4C5,H4C13,ABCG1,FGL2,NOCT,H4-16,TMEM178A,ZBTB46,RC3H1,PRTG
3_Member	Reactome Gene Sets	R-HSA-4551638	SUMOylation of chromatin organization proteins	-4.62422	-2.45563	6/71	8360,8365,8366,8367,8368,121504	H4C4,H4C8,H4C2,H4C5,H4C13,H4-16
3_Member	GO Biological Processes	GO:0006352	DNA-templated transcription, initiation	-3.95379	-1.83013	7/134	2074,8360,8365,8366,8367,8368,121504	ERCC6,H4C4,H4C8,H4C2,H4C5,H4C13,H4-16
3_Member	Reactome Gene Sets	R-HSA-3108232	SUMO E3 ligases SUMOylate target proteins	-3.91683	-1.80554	8/182	4193,4306,8360,8365,8366,8367,8368,121504	MDM2,NR3C2,H4C4,H4C8,H4C2,H4C5,H4C13,H4-16
3_Member	Reactome Gene Sets	R-HSA-2990846	SUMOylation	-3.81982	-1.71338	8/188	4193,4306,8360,8365,8366,8367,8368,121504	MDM2,NR3C2,H4C4,H4C8,H4C2,H4C5,H4C13,H4-16
3_Member	WikiPathways	WP4657	22q11.2 copy number variation syndrome	-3.74102	-1.64412	7/145	8360,8365,8366,8367,8368,9076,121504	H4C4,H4C8,H4C2,H4C5,H4C13,CLDN1,H4-16
3_Member	GO Biological Processes	GO:0030099	myeloid cell differentiation	-3.51992	-1.44377	11/383	182,2353,3976,8360,8365,8366,8367,8368,121504,130733,140685	JAG1,FOS,LIF,H4C4,H4C8,H4C2,H4C5,H4C13,H4-16,TMEM178A,ZBTB46
4_Summary	GO Biological Processes	GO:0060969	negative regulation of gene silencing	-7.68668	-5.41133	7/38	3006,3007,3008,3009,3569,6023,10984,2074,3553,3976,3082,4193,5728,5734,6711,8326,10395,7335	H1-2,H1-3,H1-4,H1-5,IL6,RMRP,KCNQ1OT1,ERCC6,IL1B,LIF,HGF,MDM2,PTEN,PTGER4,SPTBN1,FZD9,DLC1,UBE2V1
4_Member	GO Biological Processes	GO:0060969	negative regulation of gene silencing	-7.68668	-5.41133	7/38	3006,3007,3008,3009,3569,6023,10984	H1-2,H1-3,H1-4,H1-5,IL6,RMRP,KCNQ1OT1
4_Member	Reactome Gene Sets	R-HSA-140342	Apoptosis induced DNA fragmentation	-5.55639	-3.33769	4/13	3006,3007,3008,3009	H1-2,H1-3,H1-4,H1-5
4_Member	GO Biological Processes	GO:0031936	negative regulation of chromatin silencing	-5.41301	-3.20052	4/14	3006,3007,3008,3009	H1-2,H1-3,H1-4,H1-5
4_Member	GO Biological Processes	GO:0016584	nucleosome positioning	-5.15888	-2.95854	4/16	3006,3007,3008,3009	H1-2,H1-3,H1-4,H1-5
4_Member	Reactome Gene Sets	R-HSA-2559584	Formation of Senescence-Associated Heterochromatin Foci (SAHF)	-5.15888	-2.95854	4/16	3006,3007,3008,3009	H1-2,H1-3,H1-4,H1-5
4_Member	GO Biological Processes	GO:0031935	regulation of chromatin silencing	-4.93874	-2.74729	4/18	3006,3007,3008,3009	H1-2,H1-3,H1-4,H1-5
4_Member	GO Biological Processes	GO:0045815	positive regulation of gene expression, epigenetic	-3.96235	-1.83617	4/31	3006,3007,3008,3009	H1-2,H1-3,H1-4,H1-5
4_Member	GO Biological Processes	GO:0045910	negative regulation of DNA recombination	-3.32533	-1.27749	4/45	3006,3007,3008,3009	H1-2,H1-3,H1-4,H1-5
4_Member	GO Biological Processes	GO:0030261	chromosome condensation	-3.2176	-1.18175	4/48	3006,3007,3008,3009	H1-2,H1-3,H1-4,H1-5
4_Member	Reactome Gene Sets	R-HSA-75153	Apoptotic execution phase	-3.08509	-1.06778	4/52	3006,3007,3008,3009	H1-2,H1-3,H1-4,H1-5
4_Member	GO Biological Processes	GO:0000018	regulation of DNA recombination	-2.75012	-0.794368	5/107	2074,3006,3007,3008,3009	ERCC6,H1-2,H1-3,H1-4,H1-5
4_Member	GO Biological Processes	GO:1905268	negative regulation of chromatin organization	-2.72241	-0.773755	4/65	3006,3007,3008,3009	H1-2,H1-3,H1-4,H1-5
4_Member	GO Biological Processes	GO:0051053	negative regulation of DNA metabolic process	-2.45702	-0.576755	5/125	2074,3006,3007,3008,3009	ERCC6,H1-2,H1-3,H1-4,H1-5
4_Member	GO Biological Processes	GO:1902275	regulation of chromatin organization	-2.22605	-0.408412	6/201	3006,3007,3008,3009,3553,3976	H1-2,H1-3,H1-4,H1-5,IL1B,LIF
4_Member	GO Biological Processes	GO:0051129	negative regulation of cellular component organization	-2.09665	-0.338088	13/748	3006,3007,3008,3009,3082,3553,3976,4193,5728,5734,6711,8326,10395	H1-2,H1-3,H1-4,H1-5,HGF,IL1B,LIF,MDM2,PTEN,PTGER4,SPTBN1,FZD9,DLC1
4_Member	GO Biological Processes	GO:0051052	regulation of DNA metabolic process	-2.03267	-0.290054	8/361	2074,3006,3007,3008,3009,3082,3569,7335	ERCC6,H1-2,H1-3,H1-4,H1-5,HGF,IL6,UBE2V1
5_Summary	WikiPathways	WP4286	Genotoxicity pathway	-6.11905	-3.88119	7/63	3008,3708,4193,5734,8341,8342,8351	H1-4,ITPR1,MDM2,PTGER4,H2BC15,H2BC14,H3C4
5_Member	WikiPathways	WP4286	Genotoxicity pathway	-6.11905	-3.88119	7/63	3008,3708,4193,5734,8341,8342,8351	H1-4,ITPR1,MDM2,PTGER4,H2BC15,H2BC14,H3C4
6_Summary	WikiPathways	WP3624	Lung fibrosis	-6.11905	-3.88119	7/63	2006,2920,3082,3553,3569,3576,5806,2353,2354,53342,3976,718,1545,7148,182,3485,3708,8490,8786,388,5728,8870,9076,3105,2149,5734,6170,8349,8970,25819,85236,196,5740,149041,683,4214,255324,1284,72,4193	ELN,CXCL2,HGF,IL1B,IL6,CXCL8,PTX3,FOS,FOSB,IL17D,LIF,C3,CYP1B1,TNXB,JAG1,IGFBP2,ITPR1,RGS5,RGS11,RHOB,PTEN,IER3,CLDN1,HLA-A,F2R,PTGER4,RPL39,H2BC21,H2BC11,NOCT,H2BC12,AHR,PTGIS,RC3H1,BST1,MAP3K1,EPGN,COL4A2,ACTG2,MDM2
6_Member	WikiPathways	WP3624	Lung fibrosis	-6.11905	-3.88119	7/63	2006,2920,3082,3553,3569,3576,5806	ELN,CXCL2,HGF,IL1B,IL6,CXCL8,PTX3
6_Member	KEGG Pathway	ko04657	IL-17 signaling pathway	-4.97434	-2.77994	7/93	2353,2354,2920,3553,3569,3576,53342	FOS,FOSB,CXCL2,IL1B,IL6,CXCL8,IL17D
6_Member	KEGG Pathway	hsa04657	IL-17 signaling pathway	-4.9134	-2.73067	7/95	2353,2354,2920,3553,3569,3576,53342	FOS,FOSB,CXCL2,IL1B,IL6,CXCL8,IL17D
6_Member	Reactome Gene Sets	R-HSA-6783783	Interleukin-10 signaling	-4.42118	-2.2663	5/47	2920,3553,3569,3576,3976	CXCL2,IL1B,IL6,CXCL8,LIF
6_Member	GO Biological Processes	GO:0010575	positive regulation of vascular endothelial growth factor production	-4.14072	-2.00432	4/28	718,1545,3553,3569	C3,CYP1B1,IL1B,IL6
6_Member	KEGG Pathway	ko05134	Legionellosis	-4.08829	-1.95703	5/55	718,2920,3553,3569,3576	C3,CXCL2,IL1B,IL6,CXCL8
6_Member	KEGG Pathway	hsa05134	Legionellosis	-3.94155	-1.82039	5/59	718,2920,3553,3569,3576	C3,CXCL2,IL1B,IL6,CXCL8
6_Member	WikiPathways	WP2849	Hematopoietic stem cell differentiation	-3.80554	-1.7015	5/63	2353,2354,3553,3569,7148	FOS,FOSB,IL1B,IL6,TNXB
6_Member	WikiPathways	WP3617	Photodynamic therapy-induced NF-kB survival signaling	-3.75214	-1.65288	4/35	2920,3553,3569,3576	CXCL2,IL1B,IL6,CXCL8
6_Member	WikiPathways	WP4891	COVID-19 adverse outcome pathway	-3.65965	-1.56978	3/15	3553,3569,3576	IL1B,IL6,CXCL8
6_Member	Reactome Gene Sets	R-HSA-6785807	Interleukin-4 and Interleukin-13 signaling	-3.60579	-1.52738	6/108	2353,3082,3553,3569,3576,3976	FOS,HGF,IL1B,IL6,CXCL8,LIF
6_Member	KEGG Pathway	ko04668	TNF signaling pathway	-3.60579	-1.52738	6/108	182,2353,2920,3553,3569,3976	JAG1,FOS,CXCL2,IL1B,IL6,LIF
6_Member	WikiPathways	WP289	Myometrial relaxation and contraction pathways	-3.5129	-1.439	7/158	2353,3485,3553,3569,3708,8490,8786	FOS,IGFBP2,IL1B,IL6,ITPR1,RGS5,RGS11
6_Member	WikiPathways	WP4493	Cells and molecules involved in local acute inflammatory response	-3.49032	-1.41865	3/17	718,3569,3576	C3,IL6,CXCL8
6_Member	KEGG Pathway	hsa04668	TNF signaling pathway	-3.45861	-1.39137	6/115	182,2353,2920,3553,3569,3976	JAG1,FOS,CXCL2,IL1B,IL6,LIF
6_Member	KEGG Pathway	ko05133	Pertussis	-3.42266	-1.35761	5/76	718,2353,3553,3569,3576	C3,FOS,IL1B,IL6,CXCL8
6_Member	WikiPathways	WP2431	Spinal cord injury	-3.35973	-1.30552	6/120	388,2353,2920,3553,3569,3576	RHOB,FOS,CXCL2,IL1B,IL6,CXCL8
6_Member	WikiPathways	WP4754	IL-18 signaling pathway	-3.33252	-1.28256	9/279	2353,2920,3553,3569,3576,5728,5806,8870,9076	FOS,CXCL2,IL1B,IL6,CXCL8,PTEN,PTX3,IER3,CLDN1
6_Member	KEGG Pathway	hsa05133	Pertussis	-3.29477	-1.24903	5/81	718,2353,3553,3569,3576	C3,FOS,IL1B,IL6,CXCL8
6_Member	WikiPathways	WP4478	LTF danger signal response pathway	-3.27368	-1.23212	3/20	3553,3569,3576	IL1B,IL6,CXCL8
6_Member	KEGG Pathway	ko05144	Malaria	-3.18335	-1.15206	4/49	3082,3553,3569,3576	HGF,IL1B,IL6,CXCL8
6_Member	KEGG Pathway	ko05132	Salmonella infection	-3.17559	-1.14632	5/86	2353,2920,3553,3569,3576	FOS,CXCL2,IL1B,IL6,CXCL8
6_Member	GO Biological Processes	GO:0002726	positive regulation of T cell cytokine production	-3.0347	-1.0271	3/24	3105,3553,3569	HLA-A,IL1B,IL6
6_Member	KEGG Pathway	hsa05144	Malaria	-2.99298	-0.989203	4/55	3082,3553,3569,3576	HGF,IL1B,IL6,CXCL8
6_Member	KEGG Pathway	hsa05132	Salmonella infection	-2.97991	-0.979931	5/95	2353,2920,3553,3569,3576	FOS,CXCL2,IL1B,IL6,CXCL8
6_Member	GO Biological Processes	GO:0009617	response to bacterium	-2.93166	-0.942294	15/748	718,2149,2353,2920,3105,3553,3569,3576,5734,6170,8349,8970,9076,25819,85236	C3,F2R,FOS,CXCL2,HLA-A,IL1B,IL6,CXCL8,PTGER4,RPL39,H2BC21,H2BC11,CLDN1,NOCT,H2BC12
6_Member	WikiPathways	WP530	Cytokines and inflammatory response	-2.93109	-0.942294	3/26	2920,3553,3569	CXCL2,IL1B,IL6
6_Member	GO Biological Processes	GO:0010574	regulation of vascular endothelial growth factor production	-2.90633	-0.921202	4/58	718,1545,3553,3569	C3,CYP1B1,IL1B,IL6
6_Member	KEGG Pathway	ko05142	Chagas disease (American trypanosomiasis)	-2.84201	-0.86591	5/102	718,2353,3553,3569,3576	C3,FOS,IL1B,IL6,CXCL8
6_Member	GO Biological Processes	GO:0002675	positive regulation of acute inflammatory response	-2.83587	-0.861553	3/28	718,3553,3569	C3,IL1B,IL6
6_Member	GO Biological Processes	GO:0010573	vascular endothelial growth factor production	-2.79835	-0.827579	4/62	718,1545,3553,3569	C3,CYP1B1,IL1B,IL6
6_Member	GO Biological Processes	GO:0032757	positive regulation of interleukin-8 production	-2.79835	-0.827579	4/62	2149,3553,3569,53342	F2R,IL1B,IL6,IL17D
6_Member	KEGG Pathway	hsa05142	Chagas disease (American trypanosomiasis)	-2.75012	-0.794368	5/107	718,2353,3553,3569,3576	C3,FOS,IL1B,IL6,CXCL8
6_Member	KEGG Pathway	ko04659	Th17 cell differentiation	-2.75012	-0.794368	5/107	196,2353,3553,3569,53342	AHR,FOS,IL1B,IL6,IL17D
6_Member	GO Biological Processes	GO:0032496	response to lipopolysaccharide	-2.71449	-0.769417	9/342	2149,2353,2920,3553,3569,3576,5734,9076,25819	F2R,FOS,CXCL2,IL1B,IL6,CXCL8,PTGER4,CLDN1,NOCT
6_Member	WikiPathways	WP4304	Oligodendrocyte specification and differentiation, leading to myelin components for CNS	-2.70621	-0.762798	3/31	2920,3553,3976	CXCL2,IL1B,LIF
6_Member	GO Biological Processes	GO:0002456	T cell mediated immunity	-2.68016	-0.743335	5/111	182,196,3105,3553,3569	JAG1,AHR,HLA-A,IL1B,IL6
6_Member	WikiPathways	WP3893	Development and heterogeneity of the ILC family	-2.66603	-0.73568	3/32	196,3553,3569	AHR,IL1B,IL6
6_Member	WikiPathways	WP5113	Antiviral and anti-inflammatory effects of Nrf2 on SARS-CoV-2 pathway	-2.66603	-0.73568	3/32	3553,3569,3576	IL1B,IL6,CXCL8
6_Member	KEGG Pathway	hsa04659	Th17 cell differentiation	-2.66314	-0.734398	5/112	196,2353,3553,3569,53342	AHR,FOS,IL1B,IL6,IL17D
6_Member	GO Biological Processes	GO:0071347	cellular response to interleukin-1	-2.64629	-0.720746	5/113	3553,3569,3576,5740,149041	IL1B,IL6,CXCL8,PTGIS,RC3H1
6_Member	WikiPathways	WP4481	Resistin as a regulator of inflammation	-2.6272	-0.709538	3/33	3569,3576,3708	IL6,CXCL8,ITPR1
6_Member	GO Biological Processes	GO:0050670	regulation of lymphocyte proliferation	-2.60611	-0.692345	7/226	196,683,3105,3485,3553,3569,149041	AHR,BST1,HLA-A,IGFBP2,IL1B,IL6,RC3H1
6_Member	GO Biological Processes	GO:0002822	regulation of adaptive immune response based on somatic recombination of immune receptors built from immunoglobulin superfamily domains	-2.60535	-0.692345	6/168	196,718,3105,3553,3569,149041	AHR,C3,HLA-A,IL1B,IL6,RC3H1
6_Member	GO Biological Processes	GO:0032944	regulation of mononuclear cell proliferation	-2.5848	-0.677939	7/228	196,683,3105,3485,3553,3569,149041	AHR,BST1,HLA-A,IGFBP2,IL1B,IL6,RC3H1
6_Member	WikiPathways	WP4496	Signal transduction through IL1R	-2.5533	-0.650988	3/35	3553,3569,4214	IL1B,IL6,MAP3K1
6_Member	GO Biological Processes	GO:0002237	response to molecule of bacterial origin	-2.54937	-0.648555	9/362	2149,2353,2920,3553,3569,3576,5734,9076,25819	F2R,FOS,CXCL2,IL1B,IL6,CXCL8,PTGER4,CLDN1,NOCT
6_Member	GO Biological Processes	GO:0002369	T cell cytokine production	-2.48393	-0.594974	3/37	3105,3553,3569	HLA-A,IL1B,IL6
6_Member	GO Biological Processes	GO:0002724	regulation of T cell cytokine production	-2.48393	-0.594974	3/37	3105,3553,3569	HLA-A,IL1B,IL6
6_Member	Canonical Pathways	M65	PID FRA PATHWAY	-2.48393	-0.594974	3/37	3569,3576,3976	IL6,CXCL8,LIF
6_Member	GO Biological Processes	GO:0002819	regulation of adaptive immune response	-2.42227	-0.549117	6/183	196,718,3105,3553,3569,149041	AHR,C3,HLA-A,IL1B,IL6,RC3H1
6_Member	GO Biological Processes	GO:0070663	regulation of leukocyte proliferation	-2.40327	-0.534318	7/246	196,683,3105,3485,3553,3569,149041	AHR,BST1,HLA-A,IGFBP2,IL1B,IL6,RC3H1
6_Member	KEGG Pathway	hsa05332	Graft-versus-host disease	-2.35685	-0.497056	3/41	3105,3553,3569	HLA-A,IL1B,IL6
6_Member	KEGG Pathway	ko05332	Graft-versus-host disease	-2.35685	-0.497056	3/41	3105,3553,3569	HLA-A,IL1B,IL6
6_Member	GO Biological Processes	GO:0002709	regulation of T cell mediated immunity	-2.30088	-0.458999	4/85	196,3105,3553,3569	AHR,HLA-A,IL1B,IL6
6_Member	GO Biological Processes	GO:0050671	positive regulation of lymphocyte proliferation	-2.28845	-0.447875	5/137	683,3105,3485,3553,3569	BST1,HLA-A,IGFBP2,IL1B,IL6
6_Member	GO Biological Processes	GO:0032946	positive regulation of mononuclear cell proliferation	-2.27521	-0.437016	5/138	683,3105,3485,3553,3569	BST1,HLA-A,IGFBP2,IL1B,IL6
6_Member	KEGG Pathway	ko05323	Rheumatoid arthritis	-2.21335	-0.404306	4/90	2353,3553,3569,3576	FOS,IL1B,IL6,CXCL8
6_Member	GO Biological Processes	GO:0070555	response to interleukin-1	-2.21077	-0.402949	5/143	3553,3569,3576,5740,149041	IL1B,IL6,CXCL8,PTGIS,RC3H1
6_Member	WikiPathways	WP69	T-cell receptor (TCR) signaling pathway	-2.19653	-0.393525	4/91	2353,3553,3569,3708	FOS,IL1B,IL6,ITPR1
6_Member	KEGG Pathway	hsa04060	Cytokine-cytokine receptor interaction	-2.18666	-0.393157	7/270	2920,3082,3553,3569,3576,3976,53342	CXCL2,HGF,IL1B,IL6,CXCL8,LIF,IL17D
6_Member	KEGG Pathway	ko04060	Cytokine-cytokine receptor interaction	-2.18666	-0.393157	7/270	2920,3082,3553,3569,3576,3976,53342	CXCL2,HGF,IL1B,IL6,CXCL8,LIF,IL17D
6_Member	GO Biological Processes	GO:0002673	regulation of acute inflammatory response	-2.16456	-0.3816	3/48	718,3553,3569	C3,IL1B,IL6
6_Member	GO Biological Processes	GO:0032755	positive regulation of interleukin-6 production	-2.16352	-0.3816	4/93	2149,3553,3569,53342	F2R,IL1B,IL6,IL17D
6_Member	Canonical Pathways	M5883	NABA SECRETED FACTORS	-2.15937	-0.379721	8/343	2920,3082,3553,3569,3576,3976,53342,255324	CXCL2,HGF,IL1B,IL6,CXCL8,LIF,IL17D,EPGN
6_Member	GO Biological Processes	GO:0070665	positive regulation of leukocyte proliferation	-2.12509	-0.354441	5/150	683,3105,3485,3553,3569	BST1,HLA-A,IGFBP2,IL1B,IL6
6_Member	KEGG Pathway	ko05146	Amoebiasis	-2.11557	-0.352441	4/96	1284,3553,3569,3576	COL4A2,IL1B,IL6,CXCL8
6_Member	WikiPathways	WP3646	Hepatitis C and hepatocellular carcinoma	-2.11536	-0.352441	3/50	1284,3569,3576	COL4A2,IL6,CXCL8
6_Member	GO Biological Processes	GO:0010717	regulation of epithelial to mesenchymal transition	-2.06935	-0.315143	4/99	182,3553,3569,5728	JAG1,IL1B,IL6,PTEN
6_Member	KEGG Pathway	hsa05323	Rheumatoid arthritis	-2.06935	-0.315143	4/99	2353,3553,3569,3576	FOS,IL1B,IL6,CXCL8
6_Member	KEGG Pathway	ko04933	AGE-RAGE signaling pathway in diabetic complications	-2.06935	-0.315143	4/99	1284,3553,3569,3576	COL4A2,IL1B,IL6,CXCL8
6_Member	GO Biological Processes	GO:0010718	positive regulation of epithelial to mesenchymal transition	-2.06833	-0.315143	3/52	182,3553,3569	JAG1,IL1B,IL6
6_Member	GO Biological Processes	GO:0042102	positive regulation of T cell proliferation	-2.03946	-0.29475	4/101	3105,3485,3553,3569	HLA-A,IGFBP2,IL1B,IL6
6_Member	GO Biological Processes	GO:0046651	lymphocyte proliferation	-2.02502	-0.286316	7/290	196,683,3105,3485,3553,3569,149041	AHR,BST1,HLA-A,IGFBP2,IL1B,IL6,RC3H1
6_Member	GO Biological Processes	GO:0032677	regulation of interleukin-8 production	-2.02478	-0.286316	4/102	2149,3553,3569,53342	F2R,IL1B,IL6,IL17D
6_Member	GO Biological Processes	GO:0001837	epithelial to mesenchymal transition	-2.02196	-0.285561	5/159	182,3082,3553,3569,5728	JAG1,HGF,IL1B,IL6,PTEN
6_Member	GO Biological Processes	GO:0032637	interleukin-8 production	-2.01026	-0.276377	4/103	2149,3553,3569,53342	F2R,IL1B,IL6,IL17D
6_Member	GO Biological Processes	GO:0060485	mesenchyme development	-2.0097	-0.276377	7/292	72,182,3082,3553,3569,4193,5728	ACTG2,JAG1,HGF,IL1B,IL6,MDM2,PTEN
6_Member	GO Biological Processes	GO:0032943	mononuclear cell proliferation	-2.00209	-0.271217	7/293	196,683,3105,3485,3553,3569,149041	AHR,BST1,HLA-A,IGFBP2,IL1B,IL6,RC3H1
7_Summary	Canonical Pathways	M5884	NABA CORE MATRISOME	-5.57154	-3.34655	12/275	1284,2006,2202,3485,3490,5552,7148,7448,10875,54829,59277,79987,1756,9510,2627	COL4A2,ELN,EFEMP1,IGFBP2,IGFBP7,SRGN,TNXB,VTN,FGL2,ASPN,NTN4,SVEP1,DMD,ADAMTS1,GATA6
7_Member	Canonical Pathways	M5884	NABA CORE MATRISOME	-5.57154	-3.34655	12/275	1284,2006,2202,3485,3490,5552,7148,7448,10875,54829,59277,79987	COL4A2,ELN,EFEMP1,IGFBP2,IGFBP7,SRGN,TNXB,VTN,FGL2,ASPN,NTN4,SVEP1
7_Member	Canonical Pathways	M3008	NABA ECM GLYCOPROTEINS	-4.48772	-2.32741	9/196	2006,2202,3485,3490,7148,7448,10875,59277,79987	ELN,EFEMP1,IGFBP2,IGFBP7,TNXB,VTN,FGL2,NTN4,SVEP1
7_Member	Reactome Gene Sets	R-HSA-1474244	Extracellular matrix organization	-3.09752	-1.0775	9/301	1284,1756,2006,2202,7148,7448,9510,54829,59277	COL4A2,DMD,ELN,EFEMP1,TNXB,VTN,ADAMTS1,ASPN,NTN4
7_Member	Reactome Gene Sets	R-HSA-3000171	Non-integrin membrane-ECM interactions	-2.87857	-0.900675	4/59	1284,1756,7448,59277	COL4A2,DMD,VTN,NTN4
7_Member	Reactome Gene Sets	R-HSA-3000178	ECM proteoglycans	-2.47467	-0.59153	4/76	1284,7148,7448,54829	COL4A2,TNXB,VTN,ASPN
7_Member	Reactome Gene Sets	R-HSA-2129379	Molecules associated with elastic fibres	-2.45078	-0.571941	3/38	2006,2202,7448	ELN,EFEMP1,VTN
7_Member	GO Biological Processes	GO:0035987	endodermal cell differentiation	-2.24286	-0.417031	3/45	1284,2627,7448	COL4A2,GATA6,VTN
7_Member	Reactome Gene Sets	R-HSA-1566948	Elastic fibre formation	-2.24286	-0.417031	3/45	2006,2202,7448	ELN,EFEMP1,VTN
7_Member	GO Biological Processes	GO:0001706	endoderm formation	-2.02329	-0.285868	3/54	1284,2627,7448	COL4A2,GATA6,VTN
8_Summary	WikiPathways	WP615	Senescence and autophagy in cancer	-5.55649	-3.33769	8/108	3490,3553,3569,3576,4193,5728,7405,7448,1284,2149,2353,2790,3082,5734,8322,8326,7148,3708,388,9076,9510	IGFBP7,IL1B,IL6,CXCL8,MDM2,PTEN,UVRAG,VTN,COL4A2,F2R,FOS,GNG10,HGF,PTGER4,FZD4,FZD9,TNXB,ITPR1,RHOB,CLDN1,ADAMTS1
8_Member	WikiPathways	WP615	Senescence and autophagy in cancer	-5.55649	-3.33769	8/108	3490,3553,3569,3576,4193,5728,7405,7448	IGFBP7,IL1B,IL6,CXCL8,MDM2,PTEN,UVRAG,VTN
8_Member	KEGG Pathway	hsa05200	Pathways in cancer	-4.01862	-1.88991	12/395	1284,2149,2353,2790,3082,3569,3576,4193,5728,5734,8322,8326	COL4A2,F2R,FOS,GNG10,HGF,IL6,CXCL8,MDM2,PTEN,PTGER4,FZD4,FZD9
8_Member	KEGG Pathway	ko04151	PI3K-Akt signaling pathway	-2.71449	-0.769417	9/342	1284,2149,2790,3082,3569,4193,5728,7148,7448	COL4A2,F2R,GNG10,HGF,IL6,MDM2,PTEN,TNXB,VTN
8_Member	KEGG Pathway	hsa05205	Proteoglycans in cancer	-2.69384	-0.752084	7/218	3082,3569,3708,4193,7448,8322,8326	HGF,IL6,ITPR1,MDM2,VTN,FZD4,FZD9
8_Member	WikiPathways	WP4172	PI3K-Akt signaling pathway	-2.68889	-0.748784	9/345	1284,2149,2790,3082,3569,4193,5728,7148,7448	COL4A2,F2R,GNG10,HGF,IL6,MDM2,PTEN,TNXB,VTN
8_Member	WikiPathways	WP3932	Focal adhesion: PI3K-Akt-mTOR-signaling pathway	-2.42601	-0.551439	8/309	1284,2149,2790,3082,4193,5728,7148,7448	COL4A2,F2R,GNG10,HGF,MDM2,PTEN,TNXB,VTN
8_Member	KEGG Pathway	hsa04151	PI3K-Akt signaling pathway	-2.41117	-0.540818	9/380	1284,2149,2790,3082,3569,4193,5728,7148,7448	COL4A2,F2R,GNG10,HGF,IL6,MDM2,PTEN,TNXB,VTN
8_Member	GO Biological Processes	GO:0030335	positive regulation of cell migration	-2.24218	-0.417031	11/556	388,2149,3082,3553,3569,3576,4193,7448,8322,9076,9510	RHOB,F2R,HGF,IL1B,IL6,CXCL8,MDM2,VTN,FZD4,CLDN1,ADAMTS1
8_Member	KEGG Pathway	ko05205	Proteoglycans in cancer	-2.20564	-0.399027	6/203	3082,3708,4193,7448,8322,8326	HGF,ITPR1,MDM2,VTN,FZD4,FZD9
8_Member	GO Biological Processes	GO:0014911	positive regulation of smooth muscle cell migration	-2.19004	-0.393157	3/47	4193,7448,9510	MDM2,VTN,ADAMTS1
8_Member	GO Biological Processes	GO:2000147	positive regulation of cell motility	-2.10003	-0.340378	11/582	388,2149,3082,3553,3569,3576,4193,7448,8322,9076,9510	RHOB,F2R,HGF,IL1B,IL6,CXCL8,MDM2,VTN,FZD4,CLDN1,ADAMTS1
8_Member	GO Biological Processes	GO:0051272	positive regulation of cellular component movement	-2.0377	-0.294041	11/594	388,2149,3082,3553,3569,3576,4193,7448,8322,9076,9510	RHOB,F2R,HGF,IL1B,IL6,CXCL8,MDM2,VTN,FZD4,CLDN1,ADAMTS1
8_Member	GO Biological Processes	GO:0040017	positive regulation of locomotion	-2.02751	-0.286316	11/596	388,2149,3082,3553,3569,3576,4193,7448,8322,9076,9510	RHOB,F2R,HGF,IL1B,IL6,CXCL8,MDM2,VTN,FZD4,CLDN1,ADAMTS1
9_Summary	GO Biological Processes	GO:0019730	antimicrobial humoral response	-5.13518	-2.93783	8/123	2627,2920,3105,3576,6170,8349,8970,85236,683,718,3553,3569	GATA6,CXCL2,HLA-A,CXCL8,RPL39,H2BC21,H2BC11,H2BC12,BST1,C3,IL1B,IL6
9_Member	GO Biological Processes	GO:0019730	antimicrobial humoral response	-5.13518	-2.93783	8/123	2627,2920,3105,3576,6170,8349,8970,85236	GATA6,CXCL2,HLA-A,CXCL8,RPL39,H2BC21,H2BC11,H2BC12
9_Member	GO Biological Processes	GO:0006959	humoral immune response	-4.91787	-2.73067	12/319	683,718,2627,2920,3105,3553,3569,3576,6170,8349,8970,85236	BST1,C3,GATA6,CXCL2,HLA-A,IL1B,IL6,CXCL8,RPL39,H2BC21,H2BC11,H2BC12
9_Member	GO Biological Processes	GO:0002251	organ or tissue specific immune response	-4.7152	-2.54102	5/41	3569,6170,8349,8970,85236	IL6,RPL39,H2BC21,H2BC11,H2BC12
9_Member	GO Biological Processes	GO:0061844	antimicrobial humoral immune response mediated by antimicrobial peptide	-4.3595	-2.21263	6/79	2920,3576,6170,8349,8970,85236	CXCL2,CXCL8,RPL39,H2BC21,H2BC11,H2BC12
9_Member	GO Biological Processes	GO:0002227	innate immune response in mucosa	-4.20492	-2.06332	4/27	6170,8349,8970,85236	RPL39,H2BC21,H2BC11,H2BC12
9_Member	GO Biological Processes	GO:0019731	antibacterial humoral response	-3.87229	-1.76344	5/61	3105,6170,8349,8970,85236	HLA-A,RPL39,H2BC21,H2BC11,H2BC12
9_Member	GO Biological Processes	GO:0050830	defense response to Gram-positive bacterium	-3.69495	-1.60275	6/104	3105,3569,6170,8349,8970,85236	HLA-A,IL6,RPL39,H2BC21,H2BC11,H2BC12
9_Member	GO Biological Processes	GO:0002385	mucosal immune response	-3.61121	-1.52826	4/38	6170,8349,8970,85236	RPL39,H2BC21,H2BC11,H2BC12
10_Summary	GO Biological Processes	GO:0051235	maintenance of location	-4.8374	-2.65753	12/325	718,1756,2149,3553,3569,3708,4232,5552,7405,9619,57146,148867,388,2790,3082,9749	C3,DMD,F2R,IL1B,IL6,ITPR1,MEST,SRGN,UVRAG,ABCG1,LDAF1,SLC30A7,RHOB,GNG10,HGF,PHACTR2
10_Member	GO Biological Processes	GO:0051235	maintenance of location	-4.8374	-2.65753	12/325	718,1756,2149,3553,3569,3708,4232,5552,7405,9619,57146,148867	C3,DMD,F2R,IL1B,IL6,ITPR1,MEST,SRGN,UVRAG,ABCG1,LDAF1,SLC30A7
10_Member	GO Biological Processes	GO:0033363	secretory granule organization	-2.48393	-0.594974	3/37	2149,5552,9619	F2R,SRGN,ABCG1
10_Member	Reactome Gene Sets	R-HSA-76002	Platelet activation, signaling and aggregation	-2.24711	-0.417031	7/263	388,2149,2790,3082,3708,5552,9749	RHOB,F2R,GNG10,HGF,ITPR1,SRGN,PHACTR2
10_Member	GO Biological Processes	GO:0051651	maintenance of location in cell	-2.10734	-0.345518	6/213	1756,2149,3708,5552,7405,148867	DMD,F2R,ITPR1,SRGN,UVRAG,SLC30A7
11_Summary	GO Biological Processes	GO:0001568	blood vessel development	-4.75254	-2.57552	19/771	182,196,388,718,1284,1545,2627,3082,3553,3569,3576,4193,4643,5728,5740,6558,8322,9510,255324,2149,3105,5734,6711,10626,53342,3012,3490,3976,8334,10395,149041,5806	JAG1,AHR,RHOB,C3,COL4A2,CYP1B1,GATA6,HGF,IL1B,IL6,CXCL8,MDM2,MYO1E,PTEN,PTGIS,SLC12A2,FZD4,ADAMTS1,EPGN,F2R,HLA-A,PTGER4,SPTBN1,TRIM16,IL17D,H2AC8,IGFBP7,LIF,H2AC6,DLC1,RC3H1,PTX3
11_Member	GO Biological Processes	GO:0001568	blood vessel development	-4.75254	-2.57552	19/771	182,196,388,718,1284,1545,2627,3082,3553,3569,3576,4193,4643,5728,5740,6558,8322,9510,255324	JAG1,AHR,RHOB,C3,COL4A2,CYP1B1,GATA6,HGF,IL1B,IL6,CXCL8,MDM2,MYO1E,PTEN,PTGIS,SLC12A2,FZD4,ADAMTS1,EPGN
11_Member	GO Biological Processes	GO:0045765	regulation of angiogenesis	-4.56978	-2.40397	12/346	388,718,1284,1545,2627,3082,3553,3569,3576,5740,6558,9510	RHOB,C3,COL4A2,CYP1B1,GATA6,HGF,IL1B,IL6,CXCL8,PTGIS,SLC12A2,ADAMTS1
11_Member	GO Biological Processes	GO:1901342	regulation of vasculature development	-4.49707	-2.33401	12/352	388,718,1284,1545,2627,3082,3553,3569,3576,5740,6558,9510	RHOB,C3,COL4A2,CYP1B1,GATA6,HGF,IL1B,IL6,CXCL8,PTGIS,SLC12A2,ADAMTS1
11_Member	GO Biological Processes	GO:0048514	blood vessel morphogenesis	-4.28176	-2.13754	17/693	182,388,718,1284,1545,2627,3082,3553,3569,3576,4643,5728,5740,6558,8322,9510,255324	JAG1,RHOB,C3,COL4A2,CYP1B1,GATA6,HGF,IL1B,IL6,CXCL8,MYO1E,PTEN,PTGIS,SLC12A2,FZD4,ADAMTS1,EPGN
11_Member	GO Biological Processes	GO:0045766	positive regulation of angiogenesis	-3.93338	-1.81718	8/181	388,718,1545,2627,3082,3553,3576,5740	RHOB,C3,CYP1B1,GATA6,HGF,IL1B,CXCL8,PTGIS
11_Member	GO Biological Processes	GO:1904018	positive regulation of vasculature development	-3.93338	-1.81718	8/181	388,718,1545,2627,3082,3553,3576,5740	RHOB,C3,CYP1B1,GATA6,HGF,IL1B,CXCL8,PTGIS
11_Member	GO Biological Processes	GO:0001525	angiogenesis	-3.92911	-1.81538	15/600	182,388,718,1284,1545,2627,3082,3553,3569,3576,5728,5740,6558,9510,255324	JAG1,RHOB,C3,COL4A2,CYP1B1,GATA6,HGF,IL1B,IL6,CXCL8,PTEN,PTGIS,SLC12A2,ADAMTS1,EPGN
11_Member	GO Biological Processes	GO:0001819	positive regulation of cytokine production	-3.35399	-1.30191	12/467	718,1545,2149,2627,3082,3105,3553,3569,5734,6711,10626,53342	C3,CYP1B1,F2R,GATA6,HGF,HLA-A,IL1B,IL6,PTGER4,SPTBN1,TRIM16,IL17D
11_Member	GO Biological Processes	GO:0008285	negative regulation of cell population proliferation	-2.34464	-0.489432	14/779	1545,2149,2627,3012,3490,3553,3569,3576,3976,5728,8334,9510,10395,149041	CYP1B1,F2R,GATA6,H2AC8,IGFBP7,IL1B,IL6,CXCL8,LIF,PTEN,H2AC6,ADAMTS1,DLC1,RC3H1
11_Member	WikiPathways	WP2328	Allograft Rejection	-2.23039	-0.411507	4/89	718,3105,3553,3576	C3,HLA-A,IL1B,CXCL8
11_Member	GO Biological Processes	GO:0002920	regulation of humoral immune response	-2.21613	-0.404306	3/46	718,2627,3553	C3,GATA6,IL1B
11_Member	GO Biological Processes	GO:0050764	regulation of phagocytosis	-2.11557	-0.352441	4/96	718,3553,5728,5806	C3,IL1B,PTEN,PTX3
12_Summary	Canonical Pathways	M167	PID AP1 PATHWAY	-4.65965	-2.48828	6/70	2353,2354,3105,3569,3576,5728,3861,4193,182,388,9076	FOS,FOSB,HLA-A,IL6,CXCL8,PTEN,KRT14,MDM2,JAG1,RHOB,CLDN1
12_Member	Canonical Pathways	M167	PID AP1 PATHWAY	-4.65965	-2.48828	6/70	2353,2354,3105,3569,3576,5728	FOS,FOSB,HLA-A,IL6,CXCL8,PTEN
12_Member	Canonical Pathways	M115	PID REG GR PATHWAY	-3.27027	-1.23078	5/82	2353,3569,3576,3861,4193	FOS,IL6,CXCL8,KRT14,MDM2
12_Member	WikiPathways	WP4659	Gastrin signaling pathway	-2.62962	-0.709538	5/114	182,388,2353,3576,9076	JAG1,RHOB,FOS,CXCL8,CLDN1
12_Member	WikiPathways	WP2355	Corticotropin-releasing hormone signaling pathway	-2.16352	-0.3816	4/93	2353,2354,3576,3861	FOS,FOSB,CXCL8,KRT14
13_Summary	GO Biological Processes	GO:0030198	extracellular matrix organization	-4.42602	-2.26843	11/302	1284,1545,2006,3569,4643,5806,7148,9510,59277,149371,170689	COL4A2,CYP1B1,ELN,IL6,MYO1E,PTX3,TNXB,ADAMTS1,NTN4,EXOC8,ADAMTS15
13_Member	GO Biological Processes	GO:0030198	extracellular matrix organization	-4.42602	-2.26843	11/302	1284,1545,2006,3569,4643,5806,7148,9510,59277,149371,170689	COL4A2,CYP1B1,ELN,IL6,MYO1E,PTX3,TNXB,ADAMTS1,NTN4,EXOC8,ADAMTS15
13_Member	GO Biological Processes	GO:0043062	extracellular structure organization	-4.413	-2.2608	11/303	1284,1545,2006,3569,4643,5806,7148,9510,59277,149371,170689	COL4A2,CYP1B1,ELN,IL6,MYO1E,PTX3,TNXB,ADAMTS1,NTN4,EXOC8,ADAMTS15
13_Member	GO Biological Processes	GO:0045229	external encapsulating structure organization	-4.38713	-2.2376	11/305	1284,1545,2006,3569,4643,5806,7148,9510,59277,149371,170689	COL4A2,CYP1B1,ELN,IL6,MYO1E,PTX3,TNXB,ADAMTS1,NTN4,EXOC8,ADAMTS15
14_Summary	WikiPathways	WP4300	Extracellular vesicles in the crosstalk of cardiac cells	-4.14072	-2.00432	4/28	3569,5728,8470,10611,5552,81926,2627	IL6,PTEN,SORBS2,PDLIM5,SRGN,ABHD17A,GATA6
14_Member	WikiPathways	WP4300	Extracellular vesicles in the crosstalk of cardiac cells	-4.14072	-2.00432	4/28	3569,5728,8470,10611	IL6,PTEN,SORBS2,PDLIM5
14_Member	GO Biological Processes	GO:0099175	regulation of postsynapse organization	-2.21335	-0.404306	4/90	5552,5728,10611,81926	SRGN,PTEN,PDLIM5,ABHD17A
14_Member	GO Biological Processes	GO:0055017	cardiac muscle tissue growth	-2.11557	-0.352441	4/96	2627,5728,8470,10611	GATA6,PTEN,SORBS2,PDLIM5
15_Summary	GO Biological Processes	GO:0019915	lipid storage	-4.12345	-1.98963	6/87	718,3553,3569,4232,9619,57146,5205,7357,8322,10351,23762	C3,IL1B,IL6,MEST,ABCG1,LDAF1,ATP8B1,UGCG,FZD4,ABCA8,OSBP2
15_Member	GO Biological Processes	GO:0019915	lipid storage	-4.12345	-1.98963	6/87	718,3553,3569,4232,9619,57146	C3,IL1B,IL6,MEST,ABCG1,LDAF1
15_Member	GO Biological Processes	GO:0010876	lipid localization	-2.95873	-0.960631	11/448	718,3553,3569,4232,5205,7357,8322,9619,10351,23762,57146	C3,IL1B,IL6,MEST,ATP8B1,UGCG,FZD4,ABCG1,ABCA8,OSBP2,LDAF1
15_Member	GO Biological Processes	GO:0010883	regulation of lipid storage	-2.93464	-0.942294	4/57	718,3569,4232,9619	C3,IL6,MEST,ABCG1
16_Summary	GO Biological Processes	GO:0035633	maintenance of blood-brain barrier	-3.75214	-1.65288	4/35	1756,3569,6558,9076,3082,5728,2353,3482,8326,3976,2627	DMD,IL6,SLC12A2,CLDN1,HGF,PTEN,FOS,IGF2R,FZD9,LIF,GATA6
16_Member	GO Biological Processes	GO:0035633	maintenance of blood-brain barrier	-3.75214	-1.65288	4/35	1756,3569,6558,9076	DMD,IL6,SLC12A2,CLDN1
16_Member	GO Biological Processes	GO:0033137	negative regulation of peptidyl-serine phosphorylation	-2.74784	-0.794368	3/30	1756,3082,5728	DMD,HGF,PTEN
16_Member	WikiPathways	WP313	Hepatocyte growth factor receptor signaling	-2.58965	-0.681264	3/34	2353,3082,5728	FOS,HGF,PTEN
16_Member	GO Biological Processes	GO:0031100	animal organ regeneration	-2.47467	-0.59153	4/76	3082,3482,3569,9076	HGF,IGF2R,IL6,CLDN1
16_Member	GO Biological Processes	GO:0031099	regeneration	-2.25717	-0.424414	6/198	3082,3482,3569,5728,8326,9076	HGF,IGF2R,IL6,PTEN,FZD9,CLDN1
16_Member	GO Biological Processes	GO:0033135	regulation of peptidyl-serine phosphorylation	-2.19822	-0.394018	5/144	1756,3082,3569,3976,5728	DMD,HGF,IL6,LIF,PTEN
16_Member	GO Biological Processes	GO:0001889	liver development	-2.16119	-0.380406	5/147	2627,3082,3482,3569,9076	GATA6,HGF,IGF2R,IL6,CLDN1
16_Member	GO Biological Processes	GO:0061008	hepaticobiliary system development	-2.12509	-0.354441	5/150	2627,3082,3482,3569,9076	GATA6,HGF,IGF2R,IL6,CLDN1
17_Summary	CORUM	CORUM:3055	Nop56p-associated pre-rRNA complex	-3.69495	-1.60275	6/104	72,3007,6170,6218,6228,8342,5936,6171,132864,2936,729438	ACTG2,H1-3,RPL39,RPS17,RPS23,H2BC14,RBM4,RPL41,CPEB2,GSR,CASTOR2
17_Member	CORUM	CORUM:3055	Nop56p-associated pre-rRNA complex	-3.69495	-1.60275	6/104	72,3007,6170,6218,6228,8342	ACTG2,H1-3,RPL39,RPS17,RPS23,H2BC14
17_Member	GO Biological Processes	GO:0002181	cytoplasmic translation	-2.88348	-0.902822	6/148	5936,6170,6171,6218,6228,132864	RBM4,RPL39,RPL41,RPS17,RPS23,CPEB2
17_Member	Reactome Gene Sets	R-HSA-2408522	Selenoamino acid metabolism	-2.56464	-0.6593	5/118	2936,6170,6171,6218,6228	GSR,RPL39,RPL41,RPS17,RPS23
17_Member	CORUM	CORUM:306	Ribosome, cytoplasmic	-2.39464	-0.528472	4/80	6170,6171,6218,6228	RPL39,RPL41,RPS17,RPS23
17_Member	Reactome Gene Sets	R-HSA-156902	Peptide chain elongation	-2.23039	-0.411507	4/89	6170,6171,6218,6228	RPL39,RPL41,RPS17,RPS23
17_Member	Reactome Gene Sets	R-HSA-192823	Viral mRNA Translation	-2.23039	-0.411507	4/89	6170,6171,6218,6228	RPL39,RPL41,RPS17,RPS23
17_Member	WikiPathways	WP477	Cytoplasmic ribosomal proteins	-2.21335	-0.404306	4/90	6170,6171,6218,6228	RPL39,RPL41,RPS17,RPS23
17_Member	Reactome Gene Sets	R-HSA-156842	Eukaryotic Translation Elongation	-2.16352	-0.3816	4/93	6170,6171,6218,6228	RPL39,RPL41,RPS17,RPS23
17_Member	Reactome Gene Sets	R-HSA-2408557	Selenocysteine synthesis	-2.16352	-0.3816	4/93	6170,6171,6218,6228	RPL39,RPL41,RPS17,RPS23
17_Member	Reactome Gene Sets	R-HSA-72764	Eukaryotic Translation Termination	-2.16352	-0.3816	4/93	6170,6171,6218,6228	RPL39,RPL41,RPS17,RPS23
17_Member	Reactome Gene Sets	R-HSA-975956	Nonsense Mediated Decay (NMD) independent of the Exon Junction Complex (EJC)	-2.13135	-0.357534	4/95	6170,6171,6218,6228	RPL39,RPL41,RPS17,RPS23
17_Member	Reactome Gene Sets	R-HSA-9711097	Cellular response to starvation	-2.0555	-0.304454	5/156	6170,6171,6218,6228,729438	RPL39,RPL41,RPS17,RPS23,CASTOR2
17_Member	Reactome Gene Sets	R-HSA-72689	Formation of a pool of free 40S subunits	-2.03946	-0.29475	4/101	6170,6171,6218,6228	RPL39,RPL41,RPS17,RPS23
17_Member	Reactome Gene Sets	R-HSA-9633012	Response of EIF2AK4 (GCN2) to amino acid deficiency	-2.03946	-0.29475	4/101	6170,6171,6218,6228	RPL39,RPL41,RPS17,RPS23
18_Summary	GO Biological Processes	GO:0071456	cellular response to hypoxia	-3.63283	-1.54528	7/151	571,2627,4193,5728,5740,7012,132864,64393,3708	BACH1,GATA6,MDM2,PTEN,PTGIS,TERC,CPEB2,ZMAT3,ITPR1
18_Member	GO Biological Processes	GO:0071456	cellular response to hypoxia	-3.63283	-1.54528	7/151	571,2627,4193,5728,5740,7012,132864	BACH1,GATA6,MDM2,PTEN,PTGIS,TERC,CPEB2
18_Member	GO Biological Processes	GO:0036294	cellular response to decreased oxygen levels	-3.46343	-1.39398	7/161	571,2627,4193,5728,5740,7012,132864	BACH1,GATA6,MDM2,PTEN,PTGIS,TERC,CPEB2
18_Member	GO Biological Processes	GO:0071453	cellular response to oxygen levels	-3.21712	-1.18175	7/177	571,2627,4193,5728,5740,7012,132864	BACH1,GATA6,MDM2,PTEN,PTGIS,TERC,CPEB2
18_Member	WikiPathways	WP3982	miRNA regulation of p53 pathway in prostate cancer	-2.58965	-0.681264	3/34	4193,5728,64393	MDM2,PTEN,ZMAT3
18_Member	GO Biological Processes	GO:0001666	response to hypoxia	-2.44294	-0.565528	8/307	571,2627,3708,4193,5728,5740,7012,132864	BACH1,GATA6,ITPR1,MDM2,PTEN,PTGIS,TERC,CPEB2
18_Member	GO Biological Processes	GO:0036293	response to decreased oxygen levels	-2.31949	-0.472332	8/322	571,2627,3708,4193,5728,5740,7012,132864	BACH1,GATA6,ITPR1,MDM2,PTEN,PTGIS,TERC,CPEB2
18_Member	WikiPathways	WP1971	Integrated cancer pathway	-2.21613	-0.404306	3/46	571,4193,5728	BACH1,MDM2,PTEN
18_Member	GO Biological Processes	GO:0070482	response to oxygen levels	-2.13041	-0.357534	8/347	571,2627,3708,4193,5728,5740,7012,132864	BACH1,GATA6,ITPR1,MDM2,PTEN,PTGIS,TERC,CPEB2
19_Summary	GO Biological Processes	GO:0032526	response to retinoic acid	-3.62771	-1.54247	6/107	2627,3482,3485,3490,8322,10626,718,3569,60676	GATA6,IGF2R,IGFBP2,IGFBP7,FZD4,TRIM16,C3,IL6,PAPPA2
19_Member	GO Biological Processes	GO:0032526	response to retinoic acid	-3.62771	-1.54247	6/107	2627,3482,3485,3490,8322,10626	GATA6,IGF2R,IGFBP2,IGFBP7,FZD4,TRIM16
19_Member	Reactome Gene Sets	R-HSA-381426	Regulation of Insulin-like Growth Factor (IGF) transport and uptake by Insulin-like Growth Factor Binding Proteins (IGFBPs)	-2.45702	-0.576755	5/125	718,3485,3490,3569,60676	C3,IGFBP2,IGFBP7,IL6,PAPPA2
20_Summary	GO Biological Processes	GO:0009612	response to mechanical stimulus	-3.41214	-1.34928	8/216	1756,2353,2354,3485,3553,4214,5734,114780,196,5139,5728,10626,3490,3976,340784,2627,4193,4306,7357,84275,132864,3569,9076,5205	DMD,FOS,FOSB,IGFBP2,IL1B,MAP3K1,PTGER4,PKD1L2,AHR,PDE3A,PTEN,TRIM16,IGFBP7,LIF,HMX3,GATA6,MDM2,NR3C2,UGCG,SLC25A33,CPEB2,IL6,CLDN1,ATP8B1
20_Member	GO Biological Processes	GO:0009612	response to mechanical stimulus	-3.41214	-1.34928	8/216	1756,2353,2354,3485,3553,4214,5734,114780	DMD,FOS,FOSB,IGFBP2,IL1B,MAP3K1,PTGER4,PKD1L2
20_Member	GO Biological Processes	GO:0046683	response to organophosphorus	-3.14096	-1.11571	6/132	196,2353,2354,5139,5728,10626	AHR,FOS,FOSB,PDE3A,PTEN,TRIM16
20_Member	GO Biological Processes	GO:0007566	embryo implantation	-3.05374	-1.04034	4/53	3490,3553,3976,340784	IGFBP7,IL1B,LIF,HMX3
20_Member	GO Biological Processes	GO:0007565	female pregnancy	-2.99656	-0.990875	7/193	2353,2354,3485,3490,3553,3976,340784	FOS,FOSB,IGFBP2,IGFBP7,IL1B,LIF,HMX3
20_Member	GO Biological Processes	GO:0032870	cellular response to hormone stimulus	-2.98162	-0.979931	13/588	2353,2354,2627,3485,3490,3553,4193,4306,5728,5734,7357,84275,132864	FOS,FOSB,GATA6,IGFBP2,IGFBP7,IL1B,MDM2,NR3C2,PTEN,PTGER4,UGCG,SLC25A33,CPEB2
20_Member	GO Biological Processes	GO:0051384	response to glucocorticoid	-2.88348	-0.902822	6/148	2353,2354,3485,3490,3569,9076	FOS,FOSB,IGFBP2,IGFBP7,IL6,CLDN1
20_Member	GO Biological Processes	GO:0044706	multi-multicellular organism process	-2.67153	-0.736328	7/220	2353,2354,3485,3490,3553,3976,340784	FOS,FOSB,IGFBP2,IGFBP7,IL1B,LIF,HMX3
20_Member	GO Biological Processes	GO:0031960	response to corticosteroid	-2.61827	-0.702166	6/167	2353,2354,3485,3490,3569,9076	FOS,FOSB,IGFBP2,IGFBP7,IL6,CLDN1
20_Member	GO Biological Processes	GO:0097305	response to alcohol	-2.34657	-0.490008	7/252	196,2353,2354,3490,5728,5734,9076	AHR,FOS,FOSB,IGFBP7,PTEN,PTGER4,CLDN1
20_Member	GO Biological Processes	GO:1901654	response to ketone	-2.32124	-0.472748	6/192	196,2353,2354,3490,5734,9076	AHR,FOS,FOSB,IGFBP7,PTGER4,CLDN1
20_Member	GO Biological Processes	GO:0042493	response to drug	-2.27492	-0.437016	9/399	2353,2354,2627,3485,3553,4193,5139,5205,5728	FOS,FOSB,GATA6,IGFBP2,IL1B,MDM2,PDE3A,ATP8B1,PTEN
20_Member	GO Biological Processes	GO:0048545	response to steroid hormone	-2.1888	-0.393157	8/339	2353,2354,3485,3490,3569,4193,4306,9076	FOS,FOSB,IGFBP2,IGFBP7,IL6,MDM2,NR3C2,CLDN1
20_Member	GO Biological Processes	GO:0014074	response to purine-containing compound	-2.13702	-0.361898	5/149	196,2353,2354,5139,5728	AHR,FOS,FOSB,PDE3A,PTEN
