# Supplementary material for: Transcriptional profiling of Hutchinson-Gilford Progeria syndrome fibroblasts reveals deficits in mesenchymal stem cell commitment to differentiation related to early events in endochondral ossification
Source: eLife journal article supplement (doi:10.7554/elife.81290), 2022-12-29
Supplement: table1-data1 [file metascape_result.xlsx]

## Sheet: Annotation
MyList	Gene ID	Type	Tax ID	Homologene Gene ID	Homologene Gene Tax ID	Gene Symbol	Description	Biological Process (GO)	Kinase Class (UniProt)	Protein Function (Protein Atlas)	Subcellular Location (Protein Atlas)	Drug (DrugBank)	Canonical Pathways	Hallmark Gene Sets	R-HSA-3214815 HDACs deacetylate histones	GO:0045814 negative regulation of gene ex	GO:0060968 regulation of gene silencing	GO:0048729 tissue morphogenesis	GO:0007420 brain development	R-HSA-8866654 E3 ubiquitin ligases ubiquitin	hsa05200 Pathways in cancer	R-HSA-2559584 Formation of Senescence-Associ	WP4286 Genotoxicity pathway	GO:0007423 sensory organ development	GO:0048858 cell projection morphogenesis	GO:0043588 skin development	GO:1903827 regulation of cellular protein	GO:0048589 developmental growth	GO:0061351 neural precursor cell prolifer	hsa05014 Amyotrophic lateral sclerosis	GO:0001503 ossification	GO:1901214 regulation of neuron death	WP2064 Neural crest differentiation	GO:0070848 response to growth factor
AARSD1	80755	symbol	H. sapiens	80755	H. sapiens	AARSD1	alanyl-tRNA synthetase domain containing 1	GO:0006419 alanyl-tRNA aminoacylation;GO:0106074 aminoacyl-tRNA metabolism involved in translational fidelity;GO:0006450 regulation of translational fidelity		Predicted intracellular proteins	Cytosol;Nuclear membrane (Approved)				0.0	0.0	0.0	0.0	0.0	0.0	0.0	0.0	0.0	0.0	0.0	0.0	0.0	0.0	0.0	0.0	0.0	0.0	0.0	0.0
ABCB9	23457	symbol	H. sapiens	23457	H. sapiens	ABCB9	ATP binding cassette subfamily B member 9	GO:0035672 oligopeptide transmembrane transport;GO:0006857 oligopeptide transport;GO:0019885 antigen processing and presentation of endogenous peptide antigen via MHC class I		Predicted intracellular proteins; Transporters:Primary Active Transporters	Vesicles (Supported)			(M5949)HALLMARK PEROXISOME	0.0	0.0	0.0	0.0	0.0	0.0	0.0	0.0	0.0	0.0	0.0	0.0	0.0	0.0	0.0	0.0	0.0	0.0	0.0	0.0
ACACA	31	symbol	H. sapiens	31	H. sapiens	ACACA	acetyl-CoA carboxylase alpha	GO:2001295 malonyl-CoA biosynthetic process;GO:2001293 malonyl-CoA metabolic process;GO:0071380 cellular response to prostaglandin E stimulus		ENZYME proteins:Ligase; Predicted intracellular proteins; Enzymes; Disease related genes; Potential drug targets	Cytosol (Supported); Additional: Actin filaments;Nucleoli fibrillar center	Biotin		(M5923)HALLMARK PI3K AKT MTOR SIGNALING; (M5924)HALLMARK MTORC1 SIGNALING	0.0	0.0	0.0	0.0	0.0	0.0	0.0	0.0	0.0	0.0	0.0	0.0	0.0	0.0	0.0	0.0	0.0	0.0	0.0	0.0
ACTG2	72	symbol	H. sapiens	72	H. sapiens	ACTG2	actin gamma 2, smooth muscle	GO:0090131 mesenchyme migration;GO:0072132 mesenchyme morphogenesis;GO:0060485 mesenchyme development		Predicted intracellular proteins; Disease related genes			(M16801)SIG REGULATION OF THE ACTIN CYTOSKELETON BY RHO GTPASES	(M5915)HALLMARK APICAL JUNCTION	0.0	0.0	0.0	1.0	0.0	0.0	0.0	0.0	0.0	0.0	0.0	0.0	0.0	0.0	0.0	0.0	0.0	0.0	0.0	0.0
ACVR1C	130399	symbol	H. sapiens	130399	H. sapiens	ACVR1C	activin A receptor type 1C	GO:1901383 negative regulation of chorionic trophoblast cell proliferation;GO:0001834 trophectodermal cell proliferation;GO:0097360 chorionic trophoblast cell proliferation	TKL Ser/Thr protein kinase family	ENZYME proteins:Transferases; Predicted intracellular proteins; Enzymes; Kinases:TKL Ser/Thr protein kinases					0.0	0.0	0.0	1.0	0.0	0.0	1.0	0.0	0.0	0.0	0.0	0.0	0.0	1.0	0.0	0.0	0.0	0.0	0.0	1.0
ACY1	95	symbol	H. sapiens	95	H. sapiens	ACY1	aminoacylase 1	GO:0006520 cellular amino acid metabolic process;GO:0019752 carboxylic acid metabolic process;GO:0043436 oxoacid metabolic process		Predicted intracellular proteins; ENZYME proteins:Hydrolases; Enzymes; Disease related genes; Potential drug targets; Peptidases:Metallopeptidases		Aspartic acid; Acetylcysteine; Copper			0.0	0.0	0.0	0.0	0.0	0.0	0.0	0.0	0.0	0.0	0.0	0.0	0.0	0.0	0.0	0.0	0.0	0.0	0.0	0.0
ADAMTS8	11095	symbol	H. sapiens	11095	H. sapiens	ADAMTS8	ADAM metallopeptidase with thrombospondin type 1 motif 8	GO:0035435 phosphate ion transmembrane transport;GO:0006817 phosphate ion transport;GO:0098661 inorganic anion transmembrane transport		Cancer-related genes:Candidate cancer biomarkers; Predicted secreted proteins			(M3468)NABA ECM REGULATORS; (M5885)NABA MATRISOME ASSOCIATED; (M5889)NABA MATRISOME		0.0	0.0	0.0	0.0	0.0	0.0	0.0	0.0	0.0	0.0	0.0	0.0	0.0	0.0	0.0	0.0	0.0	0.0	0.0	0.0
ADCY4	196883	symbol	H. sapiens	196883	H. sapiens	ADCY4	adenylate cyclase 4	GO:0006171 cAMP biosynthetic process;GO:0009190 cyclic nucleotide biosynthetic process;GO:0046058 cAMP metabolic process		Predicted intracellular proteins; Enzymes; ENZYME proteins:Lyases			(M56)PID LPA4 PATHWAY; (M8)PID ENDOTHELIN PATHWAY; (M15)PID LYSOPHOSPHOLIPID PATHWAY		0.0	0.0	0.0	0.0	0.0	0.0	1.0	0.0	0.0	0.0	0.0	0.0	0.0	0.0	0.0	0.0	0.0	0.0	0.0	0.0
ADGRB2	576	symbol	H. sapiens	576	H. sapiens	ADGRB2	adhesion G protein-coupled receptor B2	GO:0033173 calcineurin-NFAT signaling cascade;GO:0097720 calcineurin-mediated signaling;GO:0048016 inositol phosphate-mediated signaling		Predicted intracellular proteins; Transporters; G-protein coupled receptors:GPCRs excl olfactory receptors; G-protein coupled receptors:Family 2 (B) receptors	Plasma membrane (Supported)				0.0	0.0	0.0	0.0	0.0	0.0	0.0	0.0	0.0	0.0	0.0	0.0	0.0	0.0	0.0	0.0	0.0	0.0	0.0	0.0
ADGRG2	10149	symbol	H. sapiens	10149	H. sapiens	ADGRG2	adhesion G protein-coupled receptor G2	GO:0007189 adenylate cyclase-activating G protein-coupled receptor signaling pathway;GO:0007188 adenylate cyclase-modulating G protein-coupled receptor signaling pathway;GO:0007283 spermatogenesis		Potential drug targets; G-protein coupled receptors:GPCRs excl olfactory receptors; Disease related genes; G-protein coupled receptors:Family 2 (B) receptors	Cytosol;Plasma membrane (Approved)				0.0	0.0	0.0	0.0	0.0	0.0	0.0	0.0	0.0	0.0	0.0	0.0	0.0	0.0	0.0	0.0	0.0	0.0	0.0	0.0
AEN	64782	symbol	H. sapiens	64782	H. sapiens	AEN	apoptosis enhancing nuclease	GO:0042771 intrinsic apoptotic signaling pathway in response to DNA damage by p53 class mediator;GO:0072332 intrinsic apoptotic signaling pathway by p53 class mediator;GO:0008630 intrinsic apoptotic signaling pathway in response to DNA damage		Predicted intracellular proteins	Nucleoli;Nucleoplasm (Supported); Additional: Nuclear membrane		(M256)PID TAP63 PATHWAY; (M19)PID P73PATHWAY	(M5939)HALLMARK P53 PATHWAY	0.0	0.0	0.0	0.0	0.0	0.0	0.0	0.0	1.0	0.0	0.0	0.0	0.0	0.0	0.0	0.0	0.0	0.0	0.0	0.0
AFAP1-AS1	84740	symbol	H. sapiens	84740	H. sapiens	AFAP1-AS1	AFAP1 antisense RNA 1								0.0	0.0	0.0	0.0	0.0	0.0	0.0	0.0	0.0	0.0	0.0	0.0	0.0	0.0	0.0	0.0	0.0	0.0	0.0	0.0
AFF3	3899	symbol	H. sapiens	3899	H. sapiens	AFF3	AF4/FMR2 family member 3	GO:0035116 embryonic hindlimb morphogenesis;GO:0035137 hindlimb morphogenesis;GO:0030326 embryonic limb morphogenesis		Predicted intracellular proteins; Cancer-related genes	Nucleoplasm (Supported); Additional: Cytosol				0.0	0.0	0.0	1.0	0.0	0.0	0.0	0.0	0.0	0.0	0.0	0.0	0.0	0.0	0.0	0.0	0.0	0.0	0.0	1.0
AGO1	26523	symbol	H. sapiens	26523	H. sapiens	AGO1	argonaute RISC component 1	GO:0090625 mRNA cleavage involved in gene silencing by siRNA;GO:0035279 mRNA cleavage involved in gene silencing by miRNA;GO:0098795 mRNA cleavage involved in gene silencing		Predicted intracellular proteins	Cytoplasmic bodies (Supported); Additional: Cytosol				1.0	1.0	0.0	0.0	0.0	0.0	0.0	0.0	0.0	0.0	0.0	0.0	0.0	0.0	0.0	0.0	0.0	0.0	0.0	0.0
AGRN	375790	symbol	H. sapiens	375790	H. sapiens	AGRN	agrin	GO:0045887 positive regulation of synaptic assembly at neuromuscular junction;GO:1904398 positive regulation of neuromuscular junction development;GO:0008582 regulation of synaptic assembly at neuromuscular junction		Predicted intracellular proteins; Predicted secreted proteins; Disease related genes	Cytosol (Approved); Additional: Plasma membrane		(M5887)NABA BASEMENT MEMBRANES; (M3008)NABA ECM GLYCOPROTEINS; (M5884)NABA CORE MATRISOME	(M5909)HALLMARK MYOGENESIS; (M5937)HALLMARK GLYCOLYSIS	0.0	0.0	0.0	0.0	0.0	0.0	0.0	0.0	0.0	0.0	1.0	0.0	0.0	1.0	0.0	0.0	0.0	0.0	0.0	0.0
AHCTF1P1	285116	symbol	H. sapiens	285116	H. sapiens	AHCTF1P1	AT-hook containing transcription factor 1 pseudogene 1								0.0	0.0	0.0	0.0	0.0	0.0	0.0	0.0	0.0	0.0	0.0	0.0	0.0	0.0	0.0	0.0	0.0	0.0	0.0	0.0
ALDH5A1	7915	symbol	H. sapiens	7915	H. sapiens	ALDH5A1	aldehyde dehydrogenase 5 family member A1	GO:0009450 gamma-aminobutyric acid catabolic process;GO:0009448 gamma-aminobutyric acid metabolic process;GO:0006105 succinate metabolic process		Predicted intracellular proteins; Enzymes; ENZYME proteins:Oxidoreductases; Disease related genes; Potential drug targets	Mitochondria (Supported)	Succinic acid; NADH; Valproic acid; Chlormerodrin			0.0	0.0	0.0	0.0	0.0	0.0	0.0	0.0	0.0	0.0	0.0	0.0	0.0	0.0	0.0	0.0	0.0	0.0	0.0	0.0
ALS2	57679	symbol	H. sapiens	57679	H. sapiens	ALS2	alsin Rho guanine nucleotide exchange factor ALS2	GO:0051036 regulation of endosome size;GO:0035022 positive regulation of Rac protein signal transduction;GO:0097494 regulation of vesicle size		Predicted intracellular proteins; Disease related genes	Cytosol;Intermediate filaments (Approved)			(M5893)HALLMARK MITOTIC SPINDLE	1.0	0.0	0.0	1.0	0.0	0.0	0.0	0.0	0.0	0.0	1.0	0.0	0.0	0.0	0.0	1.0	0.0	0.0	0.0	0.0
ALX3	257	symbol	H. sapiens	257	H. sapiens	ALX3	ALX homeobox 3	GO:0035116 embryonic hindlimb morphogenesis;GO:0035115 embryonic forelimb morphogenesis;GO:0035137 hindlimb morphogenesis		Predicted intracellular proteins; Disease related genes; Transcription factors:Helix-turn-helix domains	Nucleoli fibrillar center (Approved)				0.0	0.0	0.0	1.0	0.0	0.0	0.0	0.0	0.0	0.0	0.0	0.0	0.0	0.0	0.0	0.0	0.0	0.0	1.0	1.0
ALX4	60529	symbol	H. sapiens	60529	H. sapiens	ALX4	ALX homeobox 4	GO:0035116 embryonic hindlimb morphogenesis;GO:0035115 embryonic forelimb morphogenesis;GO:0035137 hindlimb morphogenesis		Predicted intracellular proteins; Disease related genes; Transcription factors:Helix-turn-helix domains	Nucleoplasm (Supported)				0.0	0.0	0.0	1.0	0.0	0.0	0.0	0.0	0.0	0.0	0.0	1.0	0.0	0.0	0.0	0.0	0.0	0.0	1.0	1.0
AMFR	267	symbol	H. sapiens	267	H. sapiens	AMFR	autocrine motility factor receptor	GO:2000638 regulation of SREBP signaling pathway;GO:1904380 endoplasmic reticulum mannose trimming;GO:0032933 SREBP signaling pathway		ENZYME proteins:Transferases; Predicted intracellular proteins; Enzymes	Endoplasmic reticulum;Golgi apparatus (Supported)			(M5906)HALLMARK ESTROGEN RESPONSE EARLY; (M5907)HALLMARK ESTROGEN RESPONSE LATE	0.0	0.0	0.0	0.0	0.0	0.0	1.0	0.0	0.0	0.0	0.0	0.0	0.0	0.0	0.0	0.0	0.0	0.0	0.0	0.0
AMOTL2	51421	symbol	H. sapiens	51421	H. sapiens	AMOTL2	angiomotin like 2	GO:0003365 establishment of cell polarity involved in ameboidal cell migration;GO:0035329 hippo signaling;GO:0030010 establishment of cell polarity		Predicted intracellular proteins	Cell Junctions (Approved)				0.0	0.0	0.0	0.0	0.0	0.0	1.0	0.0	0.0	0.0	0.0	0.0	0.0	0.0	0.0	0.0	0.0	0.0	0.0	0.0
ANK1	286	symbol	H. sapiens	286	H. sapiens	ANK1	ankyrin 1	GO:0035090 maintenance of apical/basal cell polarity;GO:0045199 maintenance of epithelial cell apical/basal polarity;GO:0030011 maintenance of cell polarity		Predicted intracellular proteins; Potential drug targets; Disease related genes; Transporters:Accessory Factors Involved in Transport				(M5945)HALLMARK HEME METABOLISM	0.0	0.0	0.0	0.0	0.0	0.0	1.0	0.0	0.0	0.0	0.0	0.0	0.0	0.0	0.0	0.0	0.0	0.0	0.0	0.0
ANK3	288	symbol	H. sapiens	288	H. sapiens	ANK3	ankyrin 3	GO:1900827 positive regulation of membrane depolarization during cardiac muscle cell action potential;GO:0072658 maintenance of protein location in membrane;GO:0072660 maintenance of protein location in plasma membrane		Cancer-related genes:Mutated cancer genes; Predicted intracellular proteins; Disease related genes	Plasma membrane (Supported)				0.0	0.0	0.0	0.0	0.0	0.0	1.0	0.0	0.0	0.0	1.0	0.0	1.0	0.0	0.0	0.0	0.0	0.0	0.0	0.0
ANKRD30BL	554226	symbol	H. sapiens	554226	H. sapiens	ANKRD30BL	ankyrin repeat domain 30B like			Predicted intracellular proteins					0.0	0.0	0.0	0.0	0.0	0.0	0.0	0.0	0.0	0.0	0.0	0.0	0.0	0.0	0.0	0.0	0.0	0.0	0.0	0.0
APBA1	320	symbol	H. sapiens	320	H. sapiens	APBA1	amyloid beta precursor protein binding family A member 1	GO:0014051 gamma-aminobutyric acid secretion;GO:0015812 gamma-aminobutyric acid transport;GO:0014047 glutamate secretion		Predicted intracellular proteins	Golgi apparatus (Supported)				0.0	0.0	0.0	1.0	0.0	0.0	0.0	0.0	0.0	0.0	0.0	0.0	0.0	1.0	0.0	0.0	0.0	0.0	0.0	0.0
APOA1BP	128240	gene_synonym	H. sapiens	128240	H. sapiens	NAXE	NAD(P)HX epimerase	GO:0031580 membrane raft distribution;GO:0051665 membrane raft localization;GO:0031579 membrane raft organization		ENZYME proteins:Isomerase; Predicted secreted proteins; Enzymes; Disease related genes; Potential drug targets	Nucleoplasm (Approved); Additional: Cytosol;Vesicles				0.0	0.0	0.0	0.0	0.0	0.0	0.0	0.0	0.0	0.0	0.0	0.0	0.0	0.0	0.0	0.0	0.0	0.0	0.0	0.0
ARFGAP2	84364	symbol	H. sapiens	84364	H. sapiens	ARFGAP2	ADP ribosylation factor GTPase activating protein 2	GO:0035964 COPI-coated vesicle budding;GO:0048200 Golgi transport vesicle coating;GO:0048205 COPI coating of Golgi vesicle		Predicted intracellular proteins	Golgi apparatus (Supported)				1.0	0.0	0.0	0.0	0.0	0.0	0.0	0.0	0.0	0.0	0.0	0.0	0.0	0.0	0.0	0.0	0.0	0.0	0.0	0.0
ARHGEF18	23370	symbol	H. sapiens	23370	H. sapiens	ARHGEF18	Rho/Rac guanine nucleotide exchange factor 18	GO:0150105 protein localization to cell-cell junction;GO:0051497 negative regulation of stress fiber assembly;GO:0032232 negative regulation of actin filament bundle assembly		Predicted intracellular proteins; Disease related genes	Cytosol (Enhanced)		(M68)PID RHOA REG PATHWAY		1.0	0.0	0.0	0.0	0.0	0.0	0.0	0.0	0.0	0.0	0.0	0.0	0.0	0.0	0.0	0.0	0.0	0.0	0.0	0.0
ARHGEF28	64283	symbol	H. sapiens	64283	H. sapiens	ARHGEF28	Rho guanine nucleotide exchange factor 28	GO:0048013 ephrin receptor signaling pathway;GO:0035023 regulation of Rho protein signal transduction;GO:0007266 Rho protein signal transduction		Predicted intracellular proteins	Cytosol;Microtubules (Approved); Additional: Plasma membrane		(M68)PID RHOA REG PATHWAY; (M281)PID FAK PATHWAY		1.0	0.0	0.0	0.0	0.0	0.0	0.0	0.0	0.0	0.0	0.0	0.0	0.0	0.0	0.0	0.0	0.0	0.0	0.0	0.0
ARSJ	79642	symbol	H. sapiens	79642	H. sapiens	ARSJ	arylsulfatase family member J			Predicted intracellular proteins; Predicted secreted proteins	Actin filaments (Enhanced)				0.0	0.0	0.0	0.0	0.0	0.0	0.0	0.0	0.0	0.0	0.0	0.0	0.0	0.0	0.0	0.0	0.0	0.0	0.0	0.0
ASTN2	23245	symbol	H. sapiens	23245	H. sapiens	ASTN2	astrotactin 2	GO:0048104 establishment of body hair or bristle planar orientation;GO:0048105 establishment of body hair planar orientation;GO:2000009 negative regulation of protein localization to cell surface		Predicted intracellular proteins	Cytosol (Approved); Additional: Nucleoplasm				0.0	0.0	0.0	1.0	0.0	0.0	0.0	0.0	0.0	0.0	0.0	0.0	1.0	0.0	0.0	0.0	0.0	0.0	0.0	0.0
ATF7IP2	80063	symbol	H. sapiens	80063	H. sapiens	ATF7IP2	activating transcription factor 7 interacting protein 2			Predicted intracellular proteins					0.0	0.0	0.0	0.0	0.0	0.0	0.0	0.0	0.0	0.0	0.0	0.0	0.0	0.0	0.0	0.0	0.0	0.0	0.0	0.0
ATP5E	514	gene_synonym	H. sapiens	514	H. sapiens	ATP5F1E	ATP synthase F1 subunit epsilon	GO:0042776 mitochondrial ATP synthesis coupled proton transport;GO:0015985 energy coupled proton transport, down electrochemical gradient;GO:0015986 ATP synthesis coupled proton transport		Predicted intracellular proteins; Disease related genes				(M5936)HALLMARK OXIDATIVE PHOSPHORYLATION	0.0	0.0	0.0	0.0	0.0	0.0	0.0	0.0	0.0	0.0	0.0	0.0	0.0	0.0	0.0	0.0	0.0	0.0	0.0	0.0
ATP6V0E2	155066	symbol	H. sapiens	155066	H. sapiens	ATP6V0E2	ATPase H+ transporting V0 subunit e2	GO:0007035 vacuolar acidification;GO:0051452 intracellular pH reduction;GO:0045851 pH reduction							1.0	0.0	0.0	0.0	0.0	0.0	0.0	0.0	0.0	0.0	0.0	0.0	0.0	0.0	0.0	0.0	0.0	0.0	0.0	0.0
ATP9B	374868	symbol	H. sapiens	374868	H. sapiens	ATP9B	ATPase phospholipid transporting 9B (putative)	GO:0045332 phospholipid translocation;GO:0034204 lipid translocation;GO:0006890 retrograde vesicle-mediated transport, Golgi to endoplasmic reticulum		Predicted intracellular proteins; ENZYME proteins:Hydrolases; Enzymes					0.0	0.0	0.0	0.0	0.0	0.0	0.0	0.0	0.0	0.0	0.0	0.0	0.0	0.0	0.0	0.0	0.0	0.0	0.0	0.0
B3GALT6	126792	symbol	H. sapiens	126792	H. sapiens	B3GALT6	beta-1,3-galactosyltransferase 6	GO:0030206 chondroitin sulfate biosynthetic process;GO:0050650 chondroitin sulfate proteoglycan biosynthetic process;GO:0015012 heparan sulfate proteoglycan biosynthetic process		ENZYME proteins:Transferases; Predicted intracellular proteins; Enzymes; Disease related genes; Potential drug targets				(M5891)HALLMARK HYPOXIA; (M5937)HALLMARK GLYCOLYSIS	0.0	0.0	0.0	0.0	0.0	0.0	0.0	0.0	0.0	0.0	0.0	0.0	0.0	0.0	0.0	0.0	0.0	0.0	0.0	0.0
BCAM	4059	symbol	H. sapiens	4059	H. sapiens	BCAM	basal cell adhesion molecule (Lutheran blood group)	GO:0007160 cell-matrix adhesion;GO:0031589 cell-substrate adhesion;GO:0007155 cell adhesion		Predicted intracellular proteins; Blood group antigen proteins; CD markers	Nucleoli fibrillar center (Approved)			(M5898)HALLMARK DNA REPAIR; (M5945)HALLMARK HEME METABOLISM	0.0	0.0	0.0	0.0	0.0	0.0	0.0	0.0	0.0	0.0	0.0	0.0	0.0	0.0	0.0	0.0	0.0	0.0	0.0	0.0
BCL11A	53335	symbol	H. sapiens	53335	H. sapiens	BCL11A	BAF chromatin remodeling complex subunit BCL11A	GO:1904799 regulation of neuron remodeling;GO:1904800 negative regulation of neuron remodeling;GO:2000173 negative regulation of branching morphogenesis of a nerve		Cancer-related genes:Candidate cancer biomarkers; Transcription factors:Zinc-coordinating DNA-binding domains; Disease related genes; Predicted intracellular proteins	Nucleoplasm (Supported); Additional: Nuclear bodies				1.0	0.0	0.0	1.0	0.0	0.0	0.0	0.0	0.0	0.0	1.0	0.0	0.0	1.0	0.0	0.0	0.0	0.0	0.0	1.0
BCR	613	symbol	H. sapiens	613	H. sapiens	BCR	BCR activator of RhoGEF and GTPase	GO:0048008 platelet-derived growth factor receptor signaling pathway;GO:0035023 regulation of Rho protein signal transduction;GO:0048041 focal adhesion assembly		ENZYME proteins:Transferases; Predicted intracellular proteins; FDA approved drug targets:Small molecule drugs; Enzymes; Disease related genes; Cancer-related genes	Cytosol;Plasma membrane (Approved); Additional: Nucleoplasm	Imatinib; Dasatinib; Bosutinib; Ponatinib	(M17200)SA B CELL RECEPTOR COMPLEXES; (M1315)SIG PIP3 SIGNALING IN B LYMPHOCYTES; (M241)PID RAC1 REG PATHWAY	(M5893)HALLMARK MITOTIC SPINDLE	1.0	0.0	0.0	0.0	0.0	0.0	1.0	0.0	0.0	0.0	0.0	1.0	0.0	0.0	0.0	0.0	0.0	0.0	0.0	0.0
BDH1	622	symbol	H. sapiens	622	H. sapiens	BDH1	3-hydroxybutyrate dehydrogenase 1	GO:0008152 metabolic process;GO:0008150 biological_process		Candidate cardiovascular disease genes; Enzymes; ENZYME proteins:Oxidoreductases; Predicted intracellular proteins	Mitochondria (Approved)	NADH	(M106)PID HNF3B PATHWAY		0.0	0.0	0.0	0.0	0.0	0.0	0.0	0.0	0.0	0.0	0.0	0.0	0.0	0.0	0.0	0.0	0.0	0.0	0.0	0.0
BEGAIN	57596	symbol	H. sapiens	57596	H. sapiens	BEGAIN	brain enriched guanylate kinase associated	GO:0098962 regulation of postsynaptic neurotransmitter receptor activity;GO:0099601 regulation of neurotransmitter receptor activity;GO:0031644 regulation of nervous system process		Predicted intracellular proteins	Nucleoplasm (Approved); Additional: Cytosol;Golgi apparatus				0.0	0.0	0.0	0.0	0.0	0.0	0.0	0.0	0.0	0.0	0.0	0.0	0.0	0.0	0.0	0.0	0.0	0.0	0.0	0.0
BIN1	274	symbol	H. sapiens	274	H. sapiens	BIN1	bridging integrator 1	GO:0106135 negative regulation of cardiac muscle cell contraction;GO:1903946 negative regulation of ventricular cardiac muscle cell action potential;GO:1902960 negative regulation of aspartic-type endopeptidase activity involved in amyloid precursor protein catabolic process		Predicted intracellular proteins; Disease related genes	Cytosol (Supported)		(M67)PID ARF6 TRAFFICKING PATHWAY; (M19)PID P73PATHWAY	(M5893)HALLMARK MITOTIC SPINDLE; (M5909)HALLMARK MYOGENESIS	0.0	0.0	0.0	1.0	0.0	0.0	0.0	0.0	0.0	0.0	0.0	0.0	0.0	0.0	0.0	0.0	0.0	0.0	0.0	1.0
BLID	414899	symbol	H. sapiens	414899	H. sapiens	BLID	BH3-like motif containing, cell death inducer	GO:0043280 positive regulation of cysteine-type endopeptidase activity involved in apoptotic process;GO:2001056 positive regulation of cysteine-type endopeptidase activity;GO:0010950 positive regulation of endopeptidase activity		Predicted intracellular proteins					0.0	0.0	0.0	0.0	0.0	0.0	0.0	0.0	0.0	0.0	0.0	0.0	0.0	0.0	0.0	0.0	0.0	0.0	0.0	0.0
BMP4	652	symbol	H. sapiens	652	H. sapiens	BMP4	bone morphogenetic protein 4	GO:0003277 apoptotic process involved in endocardial cushion morphogenesis;GO:0048390 intermediate mesoderm morphogenesis;GO:0048391 intermediate mesoderm formation		Cancer-related genes:Candidate cancer biomarkers; Predicted intracellular proteins; Predicted secreted proteins; Disease related genes		Calcium	(M181)PID BMP PATHWAY; (M5883)NABA SECRETED FACTORS; (M5885)NABA MATRISOME ASSOCIATED		1.0	1.0	1.0	1.0	1.0	0.0	1.0	0.0	0.0	1.0	0.0	1.0	1.0	1.0	0.0	0.0	1.0	0.0	1.0	1.0
BMP8B	656	symbol	H. sapiens	656	H. sapiens	BMP8B	bone morphogenetic protein 8b	GO:0010862 positive regulation of pathway-restricted SMAD protein phosphorylation;GO:0060393 regulation of pathway-restricted SMAD protein phosphorylation;GO:0060389 pathway-restricted SMAD protein phosphorylation		Predicted secreted proteins			(M5883)NABA SECRETED FACTORS; (M5885)NABA MATRISOME ASSOCIATED; (M5889)NABA MATRISOME		0.0	0.0	0.0	1.0	0.0	0.0	1.0	0.0	0.0	0.0	0.0	0.0	0.0	0.0	0.0	0.0	1.0	0.0	0.0	1.0
BRSK1	84446	symbol	H. sapiens	84446	H. sapiens	BRSK1	BR serine/threonine kinase 1	GO:0090176 microtubule cytoskeleton organization involved in establishment of planar polarity;GO:2000807 regulation of synaptic vesicle clustering;GO:0097091 synaptic vesicle clustering	CAMK Ser/Thr protein kinase family	ENZYME proteins:Transferases; Kinases:CAMK Ser/Thr protein kinases; Enzymes; Predicted intracellular proteins	Nucleoplasm (Supported); Additional: Cell Junctions		(M87)PID LKB1 PATHWAY		0.0	0.0	0.0	1.0	0.0	0.0	0.0	0.0	1.0	0.0	1.0	0.0	0.0	0.0	0.0	0.0	0.0	0.0	0.0	0.0
C17orf82	388407	gene_synonym	H. sapiens	388407	H. sapiens	LINC02875	long intergenic non-protein coding RNA 2875								0.0	0.0	0.0	0.0	0.0	0.0	0.0	0.0	0.0	0.0	0.0	0.0	0.0	0.0	0.0	0.0	0.0	0.0	0.0	0.0
C18orf32	497661	symbol	H. sapiens	497661	H. sapiens	C18orf32	chromosome 18 open reading frame 32	GO:0043123 positive regulation of I-kappaB kinase/NF-kappaB signaling;GO:0043122 regulation of I-kappaB kinase/NF-kappaB signaling;GO:0007249 I-kappaB kinase/NF-kappaB signaling			Vesicles (Approved); Additional: Nucleoplasm				0.0	0.0	0.0	0.0	0.0	0.0	0.0	0.0	0.0	0.0	0.0	0.0	0.0	0.0	0.0	0.0	0.0	0.0	0.0	0.0
C1orf53	388722	symbol	H. sapiens	388722	H. sapiens	C1orf53	chromosome 1 open reading frame 53			Predicted intracellular proteins	Vesicles (Approved); Additional: Aggresome				0.0	0.0	0.0	0.0	0.0	0.0	0.0	0.0	0.0	0.0	0.0	0.0	0.0	0.0	0.0	0.0	0.0	0.0	0.0	0.0
C20orf197	284756	gene_synonym	H. sapiens	284756	H. sapiens	LINC02910	long intergenic non-protein coding RNA 2910								0.0	0.0	0.0	0.0	0.0	0.0	0.0	0.0	0.0	0.0	0.0	0.0	0.0	0.0	0.0	0.0	0.0	0.0	0.0	0.0
C22orf23	84645	symbol	H. sapiens	84645	H. sapiens	C22orf23	chromosome 22 open reading frame 23	GO:0008150 biological_process		Predicted intracellular proteins	Nucleoplasm (Approved)				0.0	0.0	0.0	0.0	0.0	0.0	0.0	0.0	0.0	0.0	0.0	0.0	0.0	0.0	0.0	0.0	0.0	0.0	0.0	0.0
C3orf58	205428	gene_synonym	H. sapiens	205428	H. sapiens	DIPK2A	divergent protein kinase domain 2A	GO:1900019 regulation of protein kinase C activity;GO:1900020 positive regulation of protein kinase C activity;GO:0034392 negative regulation of smooth muscle cell apoptotic process		Predicted intracellular proteins; Predicted secreted proteins; Disease related genes					0.0	0.0	0.0	1.0	0.0	0.0	0.0	0.0	0.0	0.0	0.0	0.0	0.0	1.0	0.0	0.0	0.0	0.0	0.0	0.0
C6orf223	221416	symbol	H. sapiens	221416	H. sapiens	C6orf223	chromosome 6 open reading frame 223			Predicted intracellular proteins	Nucleoli fibrillar center (Approved)				0.0	0.0	0.0	0.0	0.0	0.0	0.0	0.0	0.0	0.0	0.0	0.0	0.0	0.0	0.0	0.0	0.0	0.0	0.0	0.0
C9orf131	138724	symbol	H. sapiens	138724	H. sapiens	C9orf131	chromosome 9 open reading frame 131			Predicted intracellular proteins	Mitochondria (Approved)				0.0	0.0	0.0	0.0	0.0	0.0	0.0	0.0	0.0	0.0	0.0	0.0	0.0	0.0	0.0	0.0	0.0	0.0	0.0	0.0
C9orf172	389813	gene_synonym	H. sapiens	389813	H. sapiens	AJM1	apical junction component 1 homolog	GO:0045216 cell-cell junction organization;GO:0034330 cell junction organization;GO:0016043 cellular component organization		Predicted intracellular proteins	Cytosol;Focal adhesion sites (Approved)				0.0	0.0	0.0	0.0	0.0	0.0	0.0	0.0	0.0	0.0	0.0	0.0	0.0	0.0	0.0	0.0	0.0	0.0	0.0	0.0
CACNA2D3	55799	symbol	H. sapiens	55799	H. sapiens	CACNA2D3	calcium voltage-gated channel auxiliary subunit alpha2delta 3	GO:0070588 calcium ion transmembrane transport;GO:0006816 calcium ion transport;GO:0034765 regulation of ion transmembrane transport		Predicted intracellular proteins; Transporters:Accessory Factors Involved in Transport	Nucleoplasm (Uncertain)	Amlodipine; Nilvadipine			0.0	0.0	0.0	0.0	0.0	0.0	0.0	0.0	0.0	0.0	0.0	0.0	0.0	0.0	0.0	0.0	0.0	0.0	0.0	0.0
CACNG4	27092	symbol	H. sapiens	27092	H. sapiens	CACNG4	calcium voltage-gated channel auxiliary subunit gamma 4	GO:0098943 neurotransmitter receptor transport, postsynaptic endosome to lysosome;GO:2000969 positive regulation of AMPA receptor activity;GO:0098953 receptor diffusion trapping		Transporters:Accessory Factors Involved in Transport	Cytosol;Plasma membrane (Approved)				0.0	0.0	0.0	0.0	0.0	0.0	0.0	0.0	0.0	0.0	0.0	0.0	0.0	0.0	0.0	0.0	0.0	0.0	0.0	0.0
CADM1	23705	symbol	H. sapiens	23705	H. sapiens	CADM1	cell adhesion molecule 1	GO:0042271 susceptibility to natural killer cell mediated cytotoxicity;GO:0045954 positive regulation of natural killer cell mediated cytotoxicity;GO:0002717 positive regulation of natural killer cell mediated immunity		Predicted intracellular proteins	Cell Junctions (Supported)			(M5949)HALLMARK PEROXISOME; (M5930)HALLMARK EPITHELIAL MESENCHYMAL TRANSITION	0.0	0.0	0.0	0.0	0.0	0.0	0.0	0.0	0.0	0.0	0.0	0.0	0.0	0.0	0.0	0.0	0.0	0.0	0.0	0.0
CAMK1G	57172	symbol	H. sapiens	57172	H. sapiens	CAMK1G	calcium/calmodulin dependent protein kinase IG	GO:0018105 peptidyl-serine phosphorylation;GO:0018209 peptidyl-serine modification;GO:0018193 peptidyl-amino acid modification	CAMK Ser/Thr protein kinase family	ENZYME proteins:Transferases; Kinases:CAMK Ser/Thr protein kinases; Enzymes; Predicted intracellular proteins		SU-11652; Fostamatinib			0.0	0.0	0.0	0.0	0.0	0.0	0.0	0.0	0.0	0.0	0.0	0.0	0.0	0.0	0.0	0.0	0.0	0.0	0.0	0.0
CAND2	23066	symbol	H. sapiens	23066	H. sapiens	CAND2	cullin associated and neddylation dissociated 2 (putative)	GO:0010265 SCF complex assembly;GO:0016567 protein ubiquitination;GO:0032446 protein modification by small protein conjugation		Predicted intracellular proteins	Nuclear bodies (Approved); Additional: Cytosol				0.0	0.0	0.0	0.0	0.0	0.0	0.0	0.0	0.0	0.0	0.0	0.0	0.0	0.0	0.0	0.0	0.0	0.0	0.0	0.0
CASS4	57091	symbol	H. sapiens	57091	H. sapiens	CASS4	Cas scaffold protein family member 4	GO:0090527 actin filament reorganization;GO:1900026 positive regulation of substrate adhesion-dependent cell spreading;GO:0061098 positive regulation of protein tyrosine kinase activity		Predicted intracellular proteins					0.0	0.0	0.0	0.0	0.0	0.0	0.0	0.0	0.0	0.0	1.0	0.0	0.0	0.0	0.0	0.0	0.0	0.0	0.0	0.0
CCDC106	29903	symbol	H. sapiens	29903	H. sapiens	CCDC106	coiled-coil domain containing 106			Predicted intracellular proteins	Nucleoplasm (Supported); Additional: Cytosol			(M5956)HALLMARK KRAS SIGNALING DN	0.0	0.0	0.0	0.0	0.0	0.0	0.0	0.0	0.0	0.0	0.0	0.0	0.0	0.0	0.0	0.0	0.0	0.0	0.0	0.0
CCDC6	8030	symbol	H. sapiens	8030	H. sapiens	CCDC6	coiled-coil domain containing 6	GO:0007010 cytoskeleton organization;GO:0006996 organelle organization;GO:0016043 cellular component organization		Cancer-related genes:Mutated cancer genes; Predicted intracellular proteins; Disease related genes	Cytosol (Supported)				0.0	0.0	0.0	0.0	0.0	0.0	1.0	0.0	0.0	0.0	0.0	0.0	0.0	0.0	0.0	0.0	0.0	0.0	0.0	0.0
CCNJL	79616	symbol	H. sapiens	79616	H. sapiens	CCNJL	cyclin J like	GO:0000079 regulation of cyclin-dependent protein serine/threonine kinase activity;GO:1904029 regulation of cyclin-dependent protein kinase activity;GO:0071900 regulation of protein serine/threonine kinase activity		Predicted intracellular proteins	Nuclear speckles (Approved)				0.0	0.0	0.0	0.0	0.0	0.0	0.0	0.0	0.0	0.0	0.0	0.0	0.0	0.0	0.0	0.0	0.0	0.0	0.0	0.0
CD70	970	symbol	H. sapiens	970	H. sapiens	CD70	CD70 molecule	GO:0042100 B cell proliferation;GO:0033209 tumor necrosis factor-mediated signaling pathway;GO:0042102 positive regulation of T cell proliferation		Cancer-related genes:Candidate cancer biomarkers; Predicted intracellular proteins; Cancer-related genes:Mutated cancer genes; CD markers	Nucleoplasm (Uncertain)			(M5932)HALLMARK INFLAMMATORY RESPONSE	0.0	0.0	1.0	0.0	0.0	0.0	0.0	0.0	0.0	0.0	0.0	0.0	0.0	0.0	0.0	0.0	0.0	0.0	0.0	0.0
CDH3	1001	symbol	H. sapiens	1001	H. sapiens	CDH3	cadherin 3	GO:0051796 negative regulation of timing of catagen;GO:0060901 regulation of hair cycle by canonical Wnt signaling pathway;GO:1902908 regulation of melanosome transport		Predicted intracellular proteins; Disease related genes	Plasma membrane (Supported); Additional: Cell Junctions			(M5915)HALLMARK APICAL JUNCTION	0.0	0.0	0.0	0.0	0.0	0.0	1.0	0.0	0.0	0.0	0.0	1.0	0.0	0.0	0.0	0.0	1.0	0.0	0.0	0.0
CDHR5	53841	symbol	H. sapiens	53841	H. sapiens	CDHR5	cadherin related family member 5	GO:0090675 intermicrovillar adhesion;GO:1904970 brush border assembly;GO:0032532 regulation of microvillus length		Predicted intracellular proteins					0.0	0.0	0.0	0.0	0.0	0.0	0.0	0.0	0.0	0.0	1.0	0.0	0.0	0.0	0.0	0.0	0.0	0.0	0.0	0.0
CDK6	1021	symbol	H. sapiens	1021	H. sapiens	CDK6	cyclin dependent kinase 6	GO:0045656 negative regulation of monocyte differentiation;GO:0021670 lateral ventricle development;GO:0043696 dedifferentiation	CMGC Ser/Thr protein kinase family	Cancer-related genes:Candidate cancer biomarkers; ENZYME proteins:Transferases; Predicted intracellular proteins; FDA approved drug targets:Small molecule drugs; Enzymes; Disease related genes; Kinases:CMGC Ser/Thr protein kinases	Nucleoplasm (Supported); Additional: Cytosol	Alvocidib; (2S)-2-({6-[(3-Amino-5-chlorophenyl)amino]-9-isopropyl-9H-purin-2-yl}amino)-3-methyl-1-butanol; Fisetin; Palbociclib; Ribociclib; Abemaciclib	(M234)PID IL2 STAT5 PATHWAY; (M58)PID AR PATHWAY; (M279)PID RB 1PATHWAY	(M5919)HALLMARK HEDGEHOG SIGNALING; (M5908)HALLMARK ANDROGEN RESPONSE	1.0	0.0	0.0	0.0	1.0	0.0	1.0	0.0	0.0	0.0	0.0	1.0	0.0	0.0	0.0	0.0	1.0	0.0	0.0	0.0
CELF1	10658	symbol	H. sapiens	10658	H. sapiens	CELF1	CUGBP Elav-like family member 1	GO:0016246 RNA interference;GO:0040018 positive regulation of multicellular organism growth;GO:0006376 mRNA splice site selection		Predicted intracellular proteins	Nucleoplasm (Enhanced)				0.0	1.0	0.0	1.0	1.0	0.0	0.0	0.0	0.0	0.0	0.0	0.0	0.0	1.0	0.0	0.0	0.0	0.0	0.0	0.0
CELSR1	9620	symbol	H. sapiens	9620	H. sapiens	CELSR1	cadherin EGF LAG seven-pass G-type receptor 1	GO:0060488 orthogonal dichotomous subdivision of terminal units involved in lung branching morphogenesis;GO:0060489 planar dichotomous subdivision of terminal units involved in lung branching morphogenesis;GO:0060490 lateral sprouting involved in lung morphogenesis		Transporters; G-protein coupled receptors:Family 2 (B) receptors; Predicted intracellular proteins; G-protein coupled receptors:GPCRs excl olfactory receptors; Disease related genes; Potential drug targets	Plasma membrane (Enhanced); Additional: Nucleoplasm			(M5919)HALLMARK HEDGEHOG SIGNALING; (M5906)HALLMARK ESTROGEN RESPONSE EARLY	0.0	0.0	0.0	1.0	0.0	0.0	1.0	0.0	0.0	0.0	0.0	0.0	0.0	0.0	0.0	0.0	0.0	0.0	0.0	0.0
CELSR2	1952	symbol	H. sapiens	1952	H. sapiens	CELSR2	cadherin EGF LAG seven-pass G-type receptor 2	GO:0033326 cerebrospinal fluid secretion;GO:0021999 neural plate anterior/posterior regionalization;GO:0060897 neural plate regionalization		G-protein coupled receptors:GPCRs excl olfactory receptors; G-protein coupled receptors:Family 2 (B) receptors	Cytosol (Approved)			(M5906)HALLMARK ESTROGEN RESPONSE EARLY; (M5907)HALLMARK ESTROGEN RESPONSE LATE; (M5956)HALLMARK KRAS SIGNALING DN	0.0	0.0	0.0	1.0	1.0	0.0	1.0	0.0	0.0	0.0	1.0	0.0	0.0	0.0	0.0	0.0	0.0	0.0	1.0	0.0
CENPV	201161	symbol	H. sapiens	201161	H. sapiens	CENPV	centromere protein V	GO:0031508 pericentric heterochromatin assembly;GO:0140462 pericentric heterochromatin organization;GO:0031055 chromatin remodeling at centromere		Predicted intracellular proteins	Nucleoplasm (Approved); Additional: Cytosol;Midbody				1.0	1.0	0.0	0.0	0.0	0.0	0.0	0.0	0.0	0.0	0.0	0.0	0.0	0.0	0.0	0.0	0.0	0.0	0.0	0.0
CGA	1081	symbol	H. sapiens	1081	H. sapiens	CGA	glycoprotein hormones, alpha polypeptide	GO:0046884 follicle-stimulating hormone secretion;GO:0032275 luteinizing hormone secretion;GO:0032274 gonadotropin secretion		Cancer-related genes:Candidate cancer biomarkers; Predicted secreted proteins			(M115)PID REG GR PATHWAY		0.0	0.0	0.0	0.0	0.0	0.0	0.0	0.0	0.0	0.0	0.0	0.0	0.0	1.0	0.0	0.0	0.0	0.0	0.0	0.0
CHCHD6	84303	symbol	H. sapiens	84303	H. sapiens	CHCHD6	coiled-coil-helix-coiled-coil-helix domain containing 6	GO:0042407 cristae formation;GO:0007007 inner mitochondrial membrane organization;GO:0007006 mitochondrial membrane organization		Predicted intracellular proteins	Mitochondria (Supported)				0.0	0.0	0.0	0.0	0.0	0.0	0.0	0.0	0.0	0.0	0.0	0.0	0.0	0.0	0.0	0.0	0.0	0.0	0.0	0.0
CITED4	163732	symbol	H. sapiens	163732	H. sapiens	CITED4	Cbp/p300 interacting transactivator with Glu/Asp rich carboxy-terminal domain 4	GO:0043627 response to estrogen;GO:0009725 response to hormone;GO:0045893 positive regulation of transcription, DNA-templated		Predicted intracellular proteins	Vesicles (Approved)				0.0	0.0	0.0	0.0	0.0	0.0	0.0	0.0	0.0	0.0	0.0	0.0	0.0	0.0	0.0	0.0	0.0	0.0	0.0	0.0
CLDN1	9076	symbol	H. sapiens	9076	H. sapiens	CLDN1	claudin 1	GO:0061772 xenobiotic transport across blood-nerve barrier;GO:1903544 response to butyrate;GO:1903545 cellular response to butyrate		Transporters:Transporter channels and pores; Potential drug targets; Disease related genes			(M72)PID NECTIN PATHWAY		1.0	0.0	0.0	0.0	0.0	0.0	1.0	0.0	0.0	0.0	0.0	1.0	0.0	0.0	0.0	0.0	1.0	0.0	0.0	1.0
CLEC14A	161198	symbol	H. sapiens	161198	H. sapiens	CLEC14A	C-type lectin domain containing 14A	GO:0036325 vascular endothelial growth factor receptor-3 signaling pathway;GO:0036324 vascular endothelial growth factor receptor-2 signaling pathway;GO:0001946 lymphangiogenesis			Endoplasmic reticulum;Golgi apparatus (Supported)	Resveratrol	(M5880)NABA ECM AFFILIATED; (M5885)NABA MATRISOME ASSOCIATED; (M5889)NABA MATRISOME		0.0	0.0	0.0	0.0	0.0	0.0	0.0	0.0	0.0	0.0	0.0	0.0	0.0	0.0	0.0	0.0	0.0	0.0	0.0	0.0
CNKSR3	154043	symbol	H. sapiens	154043	H. sapiens	CNKSR3	CNKSR family member 3	GO:0033137 negative regulation of peptidyl-serine phosphorylation;GO:0010765 positive regulation of sodium ion transport;GO:0070373 negative regulation of ERK1 and ERK2 cascade		Predicted intracellular proteins	Mitochondria (Approved); Additional: Cytosol				0.0	0.0	0.0	0.0	0.0	0.0	0.0	0.0	0.0	0.0	0.0	0.0	0.0	0.0	0.0	0.0	0.0	0.0	0.0	0.0
CNST	163882	symbol	H. sapiens	163882	H. sapiens	CNST	consortin, connexin sorting protein	GO:0042998 positive regulation of Golgi to plasma membrane protein transport;GO:0042996 regulation of Golgi to plasma membrane protein transport;GO:0043001 Golgi to plasma membrane protein transport		Predicted intracellular proteins	Vesicles (Supported)				0.0	0.0	0.0	0.0	0.0	0.0	0.0	0.0	0.0	0.0	0.0	0.0	1.0	0.0	0.0	0.0	0.0	0.0	0.0	0.0
COX16	51241	symbol	H. sapiens	51241	H. sapiens	COX16	cytochrome c oxidase assembly factor COX16	GO:0033617 mitochondrial cytochrome c oxidase assembly;GO:0008535 respiratory chain complex IV assembly;GO:0017004 cytochrome complex assembly		Predicted intracellular proteins	Mitochondria (Supported)				1.0	0.0	0.0	0.0	0.0	0.0	0.0	0.0	0.0	0.0	0.0	0.0	0.0	0.0	0.0	0.0	0.0	0.0	0.0	0.0
COX20	116228	symbol	H. sapiens	116228	H. sapiens	COX20	cytochrome c oxidase assembly factor COX20	GO:0033617 mitochondrial cytochrome c oxidase assembly;GO:0008535 respiratory chain complex IV assembly;GO:0017004 cytochrome complex assembly		Disease related genes	Mitochondria (Enhanced)				1.0	0.0	0.0	0.0	0.0	0.0	0.0	0.0	0.0	0.0	0.0	0.0	0.0	0.0	0.0	0.0	0.0	0.0	0.0	0.0
CPA3	1359	symbol	H. sapiens	1359	H. sapiens	CPA3	carboxypeptidase A3	GO:0002002 regulation of angiotensin levels in blood;GO:0002003 angiotensin maturation;GO:0001991 regulation of systemic arterial blood pressure by circulatory renin-angiotensin		Predicted secreted proteins; ENZYME proteins:Hydrolases; Enzymes; Peptidases:Metallopeptidases	Golgi apparatus (Approved); Additional: Nucleoplasm				0.0	0.0	0.0	0.0	0.0	0.0	0.0	0.0	0.0	0.0	0.0	0.0	0.0	0.0	0.0	0.0	0.0	0.0	0.0	0.0
CPA4	51200	symbol	H. sapiens	51200	H. sapiens	CPA4	carboxypeptidase A4	GO:0016573 histone acetylation;GO:0018393 internal peptidyl-lysine acetylation;GO:0006475 internal protein amino acid acetylation		Predicted intracellular proteins; Predicted secreted proteins; Enzymes; Peptidases:Metallopeptidases	Nucleoplasm (Approved); Additional: Centrosome;Cytosol				0.0	0.0	0.0	0.0	0.0	0.0	0.0	0.0	0.0	0.0	0.0	0.0	0.0	0.0	0.0	0.0	0.0	0.0	0.0	0.0
CSNK1E	1454	symbol	H. sapiens	1454	H. sapiens	CSNK1E	casein kinase 1 epsilon	GO:1904958 positive regulation of midbrain dopaminergic neuron differentiation;GO:1905424 regulation of Wnt-mediated midbrain dopaminergic neuron differentiation;GO:1905426 positive regulation of Wnt-mediated midbrain dopaminergic neuron differentiation	CK1 Ser/Thr protein kinase family	Cancer-related genes:Candidate cancer biomarkers; ENZYME proteins:Transferases; Predicted intracellular proteins; Enzymes; Kinases:CK1 Ser/Thr protein kinases	Cytosol;Nucleoplasm (Approved)	Seliciclib	(M95)PID CIRCADIAN PATHWAY; (M31)PID BETA CATENIN DEG PATHWAY; (M219)PID HEDGEHOG GLI PATHWAY	(M5895)HALLMARK WNT BETA CATENIN SIGNALING	1.0	0.0	0.0	0.0	1.0	0.0	1.0	0.0	0.0	0.0	1.0	0.0	1.0	0.0	0.0	0.0	0.0	0.0	0.0	1.0
CSRP1	1465	symbol	H. sapiens	1465	H. sapiens	CSRP1	cysteine and glycine rich protein 1	GO:0045214 sarcomere organization;GO:0030239 myofibril assembly;GO:0055002 striated muscle cell development		Predicted intracellular proteins		Artenimol		(M5946)HALLMARK COAGULATION; (M5921)HALLMARK COMPLEMENT	1.0	0.0	0.0	1.0	0.0	0.0	0.0	0.0	0.0	0.0	1.0	0.0	0.0	0.0	0.0	0.0	0.0	0.0	0.0	0.0
DACT2	168002	symbol	H. sapiens	168002	H. sapiens	DACT2	dishevelled binding antagonist of beta catenin 2	GO:0072061 inner medullary collecting duct development;GO:1900108 negative regulation of nodal signaling pathway;GO:1900107 regulation of nodal signaling pathway		Predicted intracellular proteins			(M286)PID TGFBR PATHWAY		0.0	0.0	0.0	0.0	0.0	0.0	0.0	0.0	0.0	0.0	1.0	1.0	0.0	0.0	0.0	0.0	0.0	0.0	0.0	1.0
DCAKD	79877	symbol	H. sapiens	79877	H. sapiens	DCAKD	dephospho-CoA kinase domain containing	GO:0015937 coenzyme A biosynthetic process;GO:0015936 coenzyme A metabolic process;GO:0033866 nucleoside bisphosphate biosynthetic process		Predicted intracellular proteins	Nucleoplasm (Approved)				0.0	0.0	0.0	0.0	0.0	0.0	0.0	0.0	0.0	0.0	0.0	0.0	0.0	0.0	0.0	0.0	0.0	0.0	0.0	0.0
DCBLD1	285761	symbol	H. sapiens	285761	H. sapiens	DCBLD1	discoidin, CUB and LCCL domain containing 1				Cytosol (Approved)				0.0	0.0	0.0	0.0	0.0	0.0	0.0	0.0	0.0	0.0	0.0	0.0	0.0	0.0	0.0	0.0	0.0	0.0	0.0	0.0
DCC	1630	symbol	H. sapiens	1630	H. sapiens	DCC	DCC netrin 1 receptor	GO:0021965 spinal cord ventral commissure morphogenesis;GO:0033563 dorsal/ventral axon guidance;GO:2000171 negative regulation of dendrite development		Cancer-related genes:Candidate cancer biomarkers; Predicted intracellular proteins; Disease related genes	Golgi apparatus (Approved)		(M108)PID NETRIN PATHWAY	(M5951)HALLMARK SPERMATOGENESIS; (M5956)HALLMARK KRAS SIGNALING DN	1.0	0.0	0.0	0.0	0.0	0.0	1.0	0.0	0.0	0.0	1.0	0.0	0.0	1.0	0.0	0.0	0.0	1.0	0.0	0.0
DEF6	50619	symbol	H. sapiens	50619	H. sapiens	DEF6	DEF6 guanine nucleotide exchange factor	GO:0051056 regulation of small GTPase mediated signal transduction;GO:0007264 small GTPase mediated signal transduction;GO:1902531 regulation of intracellular signal transduction		Predicted intracellular proteins	Nucleoplasm (Enhanced)		(M241)PID RAC1 REG PATHWAY; (M68)PID RHOA REG PATHWAY	(M5939)HALLMARK P53 PATHWAY	1.0	0.0	0.0	0.0	0.0	0.0	0.0	0.0	0.0	0.0	0.0	0.0	0.0	0.0	0.0	0.0	0.0	0.0	0.0	0.0
DFFA	1676	symbol	H. sapiens	1676	H. sapiens	DFFA	DNA fragmentation factor subunit alpha	GO:0032076 negative regulation of deoxyribonuclease activity;GO:1902511 negative regulation of apoptotic DNA fragmentation;GO:1903625 negative regulation of DNA catabolic process		Predicted intracellular proteins	Cytosol;Plasma membrane (Supported)		(M7997)SA CASPASE CASCADE; (M197)PID HIV NEF PATHWAY; (M220)PID CASPASE PATHWAY	(M5902)HALLMARK APOPTOSIS	0.0	0.0	0.0	0.0	0.0	0.0	0.0	1.0	0.0	0.0	0.0	0.0	0.0	0.0	0.0	0.0	0.0	0.0	0.0	0.0
DHCR24	1718	symbol	H. sapiens	1718	H. sapiens	DHCR24	24-dehydrocholesterol reductase	GO:0033489 cholesterol biosynthetic process via desmosterol;GO:0033490 cholesterol biosynthetic process via lathosterol;GO:0030539 male genitalia development		Predicted intracellular proteins; Enzymes; ENZYME proteins:Oxidoreductases; Disease related genes; Potential drug targets				(M5908)HALLMARK ANDROGEN RESPONSE; (M5949)HALLMARK PEROXISOME; (M5948)HALLMARK BILE ACID METABOLISM	0.0	0.0	0.0	0.0	0.0	0.0	0.0	0.0	0.0	0.0	0.0	1.0	0.0	0.0	0.0	0.0	0.0	1.0	0.0	0.0
DHRS13	147015	symbol	H. sapiens	147015	H. sapiens	DHRS13	dehydrogenase/reductase 13	GO:0042574 retinal metabolic process;GO:0042572 retinol metabolic process;GO:0006081 cellular aldehyde metabolic process		Predicted intracellular proteins; Predicted secreted proteins	Vesicles (Approved)				0.0	0.0	0.0	0.0	0.0	0.0	0.0	0.0	0.0	0.0	0.0	0.0	0.0	0.0	0.0	0.0	0.0	0.0	0.0	0.0
DLK1	8788	symbol	H. sapiens	8788	H. sapiens	DLK1	delta like non-canonical Notch ligand 1	GO:0045746 negative regulation of Notch signaling pathway;GO:0008593 regulation of Notch signaling pathway;GO:0007219 Notch signaling pathway		Predicted intracellular proteins	Golgi apparatus (Approved)		(M106)PID HNF3B PATHWAY; (M17)PID NOTCH PATHWAY		1.0	0.0	0.0	0.0	0.0	0.0	1.0	0.0	0.0	0.0	0.0	0.0	0.0	0.0	0.0	0.0	0.0	0.0	0.0	0.0
DLL3	10683	symbol	H. sapiens	10683	H. sapiens	DLL3	delta like canonical Notch ligand 3	GO:0007386 compartment pattern specification;GO:0048339 paraxial mesoderm development;GO:0001756 somitogenesis		Predicted intracellular proteins; Disease related genes	Nucleoplasm;Plasma membrane (Approved)		(M17)PID NOTCH PATHWAY		1.0	0.0	0.0	1.0	0.0	0.0	1.0	0.0	0.0	0.0	0.0	0.0	0.0	0.0	0.0	0.0	0.0	0.0	1.0	0.0
DNAJC16	23341	symbol	H. sapiens	23341	H. sapiens	DNAJC16	DnaJ heat shock protein family (Hsp40) member C16				Vesicles (Approved)				0.0	0.0	0.0	0.0	0.0	0.0	0.0	0.0	0.0	0.0	0.0	0.0	0.0	0.0	0.0	0.0	0.0	0.0	0.0	0.0
DSCAM	1826	symbol	H. sapiens	1826	H. sapiens	DSCAM	DS cell adhesion molecule	GO:0060060 post-embryonic retina morphogenesis in camera-type eye;GO:0048842 positive regulation of axon extension involved in axon guidance;GO:0038007 netrin-activated signaling pathway			Golgi apparatus (Approved)		(M285)PID HNF3A PATHWAY; (M200)PID ERA GENOMIC PATHWAY		0.0	0.0	0.0	0.0	0.0	0.0	0.0	0.0	0.0	1.0	1.0	0.0	0.0	1.0	0.0	0.0	0.0	0.0	0.0	0.0
DUSP8	1850	symbol	H. sapiens	1850	H. sapiens	DUSP8	dual specificity phosphatase 8	GO:0035970 peptidyl-threonine dephosphorylation;GO:0035335 peptidyl-tyrosine dephosphorylation;GO:0006470 protein dephosphorylation		Predicted intracellular proteins; ENZYME proteins:Hydrolases; Enzymes	Cytosol (Approved)		(M76)PID P38 ALPHA BETA PATHWAY; (M3721)ST JNK MAPK PATHWAY; (M166)PID ATF2 PATHWAY		0.0	0.0	0.0	0.0	0.0	0.0	0.0	0.0	0.0	0.0	0.0	0.0	0.0	0.0	0.0	0.0	0.0	0.0	0.0	0.0
EDN2	1907	symbol	H. sapiens	1907	H. sapiens	EDN2	endothelin 2	GO:0003058 hormonal regulation of the force of heart contraction;GO:0003099 positive regulation of the force of heart contraction by chemical signal;GO:0014826 vein smooth muscle contraction		Predicted secreted proteins	Cytosol (Approved)		(M8)PID ENDOTHELIN PATHWAY; (M145)PID P53 DOWNSTREAM PATHWAY	(M5891)HALLMARK HYPOXIA; (M5956)HALLMARK KRAS SIGNALING DN	0.0	0.0	0.0	0.0	0.0	0.0	0.0	0.0	0.0	0.0	0.0	0.0	0.0	0.0	0.0	0.0	0.0	0.0	0.0	0.0
EFNB1	1947	symbol	H. sapiens	1947	H. sapiens	EFNB1	ephrin B1	GO:0031295 T cell costimulation;GO:0031294 lymphocyte costimulation;GO:0048013 ephrin receptor signaling pathway		Cancer-related genes:Candidate cancer biomarkers; Disease related genes	Plasma membrane (Supported)		(M257)PID EPHRINB REV PATHWAY; (M62)PID EPHB FWD PATHWAY		0.0	0.0	0.0	0.0	0.0	0.0	0.0	0.0	0.0	0.0	1.0	0.0	0.0	0.0	0.0	0.0	0.0	0.0	1.0	0.0
EGLN2	112398	symbol	H. sapiens	112398	H. sapiens	EGLN2	egl-9 family hypoxia inducible factor 2	GO:0018401 peptidyl-proline hydroxylation to 4-hydroxy-L-proline;GO:0019511 peptidyl-proline hydroxylation;GO:0018126 protein hydroxylation		Predicted intracellular proteins; Enzymes; ENZYME proteins:Oxidoreductases	Nucleoplasm (Supported)	Ascorbic acid; Roxadustat	(M180)PID HIF1A PATHWAY; (M44)PID HIF2PATHWAY; (M3468)NABA ECM REGULATORS	(M5938)HALLMARK REACTIVE OXYGEN SPECIES PATHWAY	1.0	0.0	0.0	0.0	0.0	0.0	1.0	0.0	0.0	0.0	0.0	0.0	0.0	1.0	0.0	0.0	0.0	1.0	0.0	0.0
EHD3	30845	symbol	H. sapiens	30845	H. sapiens	EHD3	EH domain containing 3	GO:0086036 regulation of cardiac muscle cell membrane potential;GO:0090160 Golgi to lysosome transport;GO:0034498 early endosome to Golgi transport		Predicted intracellular proteins	Plasma membrane (Approved)				0.0	0.0	1.0	0.0	0.0	0.0	0.0	0.0	0.0	0.0	0.0	0.0	0.0	0.0	0.0	0.0	0.0	0.0	0.0	0.0
EIF2AK4	440275	symbol	H. sapiens	440275	H. sapiens	EIF2AK4	eukaryotic translation initiation factor 2 alpha kinase 4	GO:0071262 regulation of translational initiation in response to starvation;GO:0071264 positive regulation of translational initiation in response to starvation;GO:0140469 GCN2-mediated signaling	Other	ENZYME proteins:Transferases; Kinases; Predicted intracellular proteins; Enzymes; Disease related genes; Potential drug targets	Cytosol (Approved)	Fostamatinib			1.0	0.0	0.0	0.0	0.0	0.0	0.0	0.0	0.0	0.0	1.0	0.0	0.0	1.0	0.0	0.0	0.0	0.0	0.0	1.0
EIF2S3	1968	symbol	H. sapiens	1968	H. sapiens	EIF2S3	eukaryotic translation initiation factor 2 subunit gamma	GO:0045903 positive regulation of translational fidelity;GO:0001731 formation of translation preinitiation complex;GO:0006450 regulation of translational fidelity		Predicted intracellular proteins; Disease related genes		Guanosine-5'-Diphosphate		(M5941)HALLMARK UV RESPONSE UP	1.0	0.0	0.0	0.0	0.0	0.0	0.0	0.0	0.0	0.0	0.0	0.0	0.0	0.0	0.0	0.0	0.0	0.0	0.0	0.0
EIF3F	8665	symbol	H. sapiens	8665	H. sapiens	EIF3F	eukaryotic translation initiation factor 3 subunit F	GO:0075522 IRES-dependent viral translational initiation;GO:0019081 viral translation;GO:0001732 formation of cytoplasmic translation initiation complex		Predicted intracellular proteins; ENZYME proteins:Hydrolases; Enzymes		Quercetin			0.0	0.0	0.0	0.0	0.0	0.0	0.0	0.0	0.0	0.0	0.0	0.0	0.0	0.0	0.0	0.0	0.0	0.0	0.0	0.0
EIF6	3692	symbol	H. sapiens	3692	H. sapiens	EIF6	eukaryotic translation initiation factor 6	GO:1902626 assembly of large subunit precursor of preribosome;GO:0042256 mature ribosome assembly;GO:0000054 ribosomal subunit export from nucleus		Predicted intracellular proteins	Nucleoplasm (Supported)	Copper			1.0	1.0	0.0	0.0	0.0	0.0	0.0	0.0	0.0	0.0	0.0	0.0	0.0	0.0	0.0	0.0	0.0	0.0	0.0	0.0
ELAVL2	1993	symbol	H. sapiens	1993	H. sapiens	ELAVL2	ELAV like RNA binding protein 2	GO:0006355 regulation of transcription, DNA-templated;GO:1903506 regulation of nucleic acid-templated transcription;GO:2001141 regulation of RNA biosynthetic process		Predicted intracellular proteins	Nucleoplasm (Approved); Additional: Cytosol				0.0	0.0	0.0	0.0	0.0	0.0	0.0	0.0	0.0	0.0	0.0	0.0	0.0	0.0	0.0	0.0	0.0	0.0	0.0	0.0
ELMSAN1	91748	gene_synonym	H. sapiens	91748	H. sapiens	MIDEAS	mitotic deacetylase associated SANT domain protein	GO:0016575 histone deacetylation;GO:0006476 protein deacetylation;GO:0035601 protein deacylation		Predicted intracellular proteins; Transcription factors:Helix-turn-helix domains	Nucleoplasm (Enhanced)				0.0	0.0	0.0	0.0	0.0	0.0	0.0	0.0	0.0	0.0	0.0	0.0	0.0	0.0	0.0	0.0	0.0	0.0	0.0	0.0
ELOVL2	54898	symbol	H. sapiens	54898	H. sapiens	ELOVL2	ELOVL fatty acid elongase 2	GO:0019367 fatty acid elongation, saturated fatty acid;GO:0019368 fatty acid elongation, unsaturated fatty acid;GO:0034625 fatty acid elongation, monounsaturated fatty acid		ENZYME proteins:Transferases; Enzymes		alpha-Linolenic acid		(M5906)HALLMARK ESTROGEN RESPONSE EARLY	0.0	0.0	0.0	0.0	0.0	0.0	0.0	0.0	0.0	0.0	0.0	0.0	0.0	0.0	0.0	0.0	0.0	0.0	0.0	0.0
EMILIN3	90187	symbol	H. sapiens	90187	H. sapiens	EMILIN3	elastin microfibril interfacer 3			Predicted secreted proteins	Golgi apparatus (Approved); Additional: Cytokinetic bridge;Microtubules		(M3008)NABA ECM GLYCOPROTEINS; (M5884)NABA CORE MATRISOME; (M5889)NABA MATRISOME		0.0	0.0	0.0	0.0	0.0	0.0	0.0	0.0	0.0	0.0	0.0	0.0	0.0	0.0	0.0	0.0	0.0	0.0	0.0	1.0
ENDOV	284131	symbol	H. sapiens	284131	H. sapiens	ENDOV	endonuclease V	GO:0090502 RNA phosphodiester bond hydrolysis, endonucleolytic;GO:0090501 RNA phosphodiester bond hydrolysis;GO:0090305 nucleic acid phosphodiester bond hydrolysis		Predicted intracellular proteins					0.0	0.0	0.0	0.0	0.0	0.0	0.0	0.0	0.0	0.0	0.0	0.0	0.0	0.0	0.0	0.0	0.0	0.0	0.0	0.0
EPHA2	1969	symbol	H. sapiens	1969	H. sapiens	EPHA2	EPH receptor A2	GO:0060034 notochord cell differentiation;GO:0060035 notochord cell development;GO:0048320 axial mesoderm formation	Tyr protein kinase family	Cancer-related genes:Candidate cancer biomarkers; ENZYME proteins:Transferases; Kinases:Tyr protein kinases; RAS pathway related proteins; Cancer-related genes:Mutated cancer genes; FDA approved drug targets:Small molecule drugs; Enzymes; Disease related genes	Cell Junctions;Plasma membrane (Supported); Additional: Golgi apparatus;Nuclear speckles	Dasatinib; Phosphoaminophosphonic Acid-Adenylate Ester; Regorafenib; Fostamatinib	(M273)PID EPHA2 FWD PATHWAY; (M177)PID EPHA FWDPATHWAY; (M86)PID ARF6 PATHWAY	(M5934)HALLMARK XENOBIOTIC METABOLISM; (M5939)HALLMARK P53 PATHWAY	1.0	0.0	0.0	1.0	0.0	0.0	0.0	0.0	0.0	1.0	1.0	1.0	1.0	0.0	0.0	0.0	1.0	0.0	0.0	1.0
ETHE1	23474	symbol	H. sapiens	23474	H. sapiens	ETHE1	ETHE1 persulfide dioxygenase	GO:0070813 hydrogen sulfide metabolic process;GO:0006749 glutathione metabolic process;GO:0006575 cellular modified amino acid metabolic process		Predicted intracellular proteins; Enzymes; ENZYME proteins:Oxidoreductases; Disease related genes; Potential drug targets	Mitochondria (Enhanced)			(M5892)HALLMARK CHOLESTEROL HOMEOSTASIS	0.0	0.0	0.0	0.0	0.0	0.0	0.0	0.0	0.0	0.0	0.0	0.0	0.0	0.0	0.0	0.0	0.0	0.0	0.0	0.0
EYA3	2140	symbol	H. sapiens	2140	H. sapiens	EYA3	EYA transcriptional coactivator and phosphatase 3	GO:0016576 histone dephosphorylation;GO:1901099 negative regulation of signal transduction in absence of ligand;GO:2001240 negative regulation of extrinsic apoptotic signaling pathway in absence of ligand		Predicted intracellular proteins; ENZYME proteins:Hydrolases; Enzymes	Nucleoplasm (Supported)				1.0	0.0	0.0	0.0	0.0	0.0	0.0	0.0	1.0	0.0	0.0	0.0	0.0	0.0	0.0	0.0	0.0	0.0	0.0	0.0
F2R	2149	symbol	H. sapiens	2149	H. sapiens	F2R	coagulation factor II thrombin receptor	GO:1900134 negative regulation of renin secretion into blood stream;GO:0007529 establishment of synaptic specificity at neuromuscular junction;GO:0099552 trans-synaptic signaling by lipid, modulating synaptic transmission		Predicted intracellular proteins; FDA approved drug targets:Small molecule drugs; G-protein coupled receptors:GPCRs excl olfactory receptors		Streptokinase; SR-123781A; Vorapaxar; Thrombin	(M238)PID THROMBIN PAR1 PATHWAY	(M5902)HALLMARK APOPTOSIS; (M5939)HALLMARK P53 PATHWAY; (M5950)HALLMARK ALLOGRAFT REJECTION	0.0	0.0	1.0	0.0	0.0	0.0	1.0	0.0	0.0	0.0	0.0	0.0	0.0	0.0	0.0	0.0	0.0	1.0	0.0	0.0
F2RL2	2151	symbol	H. sapiens	2151	H. sapiens	F2RL2	coagulation factor II thrombin receptor like 2	GO:0070493 thrombin-activated receptor signaling pathway;GO:0035025 positive regulation of Rho protein signal transduction;GO:0051482 positive regulation of cytosolic calcium ion concentration involved in phospholipase C-activating G protein-coupled signaling pathway		G-protein coupled receptors:GPCRs excl olfactory receptors			(M138)PID THROMBIN PAR4 PATHWAY; (M15743)ST GA12 PATHWAY; (M193)PID NEPHRIN NEPH1 PATHWAY	(M5946)HALLMARK COAGULATION; (M5947)HALLMARK IL2 STAT5 SIGNALING	0.0	0.0	1.0	0.0	0.0	0.0	0.0	0.0	0.0	0.0	0.0	0.0	0.0	0.0	0.0	0.0	0.0	0.0	0.0	0.0
FAHD2B	151313	symbol	H. sapiens	151313	H. sapiens	FAHD2B	fumarylacetoacetate hydrolase domain containing 2B			Predicted intracellular proteins					0.0	0.0	0.0	0.0	0.0	0.0	0.0	0.0	0.0	0.0	0.0	0.0	0.0	0.0	0.0	0.0	0.0	0.0	0.0	0.0
FAM120C	54954	symbol	H. sapiens	54954	H. sapiens	FAM120C	family with sequence similarity 120C			Predicted intracellular proteins	Nuclear speckles (Approved)				0.0	0.0	0.0	0.0	0.0	0.0	0.0	0.0	0.0	0.0	0.0	0.0	0.0	0.0	0.0	0.0	0.0	0.0	0.0	0.0
FAM173A	65990	gene_synonym	H. sapiens	65990	H. sapiens	ANTKMT	adenine nucleotide translocase lysine methyltransferase	GO:1905271 regulation of proton-transporting ATP synthase activity, rotational mechanism;GO:1905273 positive regulation of proton-transporting ATP synthase activity, rotational mechanism;GO:1905706 regulation of mitochondrial ATP synthesis coupled proton transport		Predicted intracellular proteins	Cytosol (Approved)				0.0	0.0	0.0	0.0	0.0	0.0	0.0	0.0	0.0	0.0	0.0	0.0	1.0	0.0	0.0	0.0	0.0	0.0	0.0	0.0
FAM46B	115572	gene_synonym	H. sapiens	115572	H. sapiens	TENT5B	terminal nucleotidyltransferase 5B	GO:0048255 mRNA stabilization;GO:1902373 negative regulation of mRNA catabolic process;GO:0043489 RNA stabilization		Predicted secreted proteins					0.0	0.0	0.0	0.0	0.0	0.0	0.0	0.0	0.0	0.0	0.0	0.0	0.0	0.0	0.0	0.0	0.0	0.0	0.0	0.0
FAM96B	51647	gene_synonym	H. sapiens	51647	H. sapiens	CIAO2B	cytosolic iron-sulfur assembly component 2B	GO:0106035 protein maturation by [4Fe-4S] cluster transfer;GO:0097428 protein maturation by iron-sulfur cluster transfer;GO:0016226 iron-sulfur cluster assembly		Predicted intracellular proteins	Cytosol;Nucleoplasm (Supported)				0.0	0.0	0.0	0.0	0.0	0.0	0.0	0.0	0.0	0.0	0.0	0.0	0.0	0.0	0.0	0.0	0.0	0.0	0.0	0.0
FASN	2194	symbol	H. sapiens	2194	H. sapiens	FASN	fatty acid synthase	GO:0030223 neutrophil differentiation;GO:0008611 ether lipid biosynthetic process;GO:0046504 glycerol ether biosynthetic process		Cancer-related genes:Candidate cancer biomarkers; ENZYME proteins:Transferases; ENZYME proteins:Lyases; Predicted intracellular proteins; FDA approved drug targets:Small molecule drugs; ENZYME proteins:Hydrolases; ENZYME proteins:Oxidoreductases; Enzymes	Cytosol;Plasma membrane (Enhanced)	Cerulenin; Orlistat	(M236)PID DELTA NP63 PATHWAY; (M19)PID P73PATHWAY	(M5892)HALLMARK CHOLESTEROL HOMEOSTASIS; (M5935)HALLMARK FATTY ACID METABOLISM; (M5906)HALLMARK ESTROGEN RESPONSE EARLY	1.0	0.0	0.0	0.0	0.0	0.0	1.0	0.0	0.0	0.0	0.0	1.0	0.0	0.0	0.0	0.0	1.0	0.0	0.0	0.0
FBN2	2201	symbol	H. sapiens	2201	H. sapiens	FBN2	fibrillin 2	GO:0035583 sequestering of TGFbeta in extracellular matrix;GO:0071694 maintenance of protein location in extracellular region;GO:0060346 bone trabecula formation		Cancer-related genes:Mutational cancer driver genes; Predicted secreted proteins; Disease related genes; Predicted intracellular proteins	Cytosol (Approved); Additional: Nucleoplasm	Calcium citrate; Calcium Phosphate; Calcium phosphate dihydrate	(M3008)NABA ECM GLYCOPROTEINS; (M5884)NABA CORE MATRISOME; (M5889)NABA MATRISOME	(M5930)HALLMARK EPITHELIAL MESENCHYMAL TRANSITION	0.0	0.0	0.0	1.0	0.0	0.0	0.0	0.0	0.0	1.0	0.0	0.0	0.0	0.0	0.0	0.0	1.0	0.0	0.0	1.0
FBXL19	54620	symbol	H. sapiens	54620	H. sapiens	FBXL19	F-box and leucine rich repeat protein 19	GO:0016577 histone demethylation;GO:0006482 protein demethylation;GO:0008214 protein dealkylation		Predicted intracellular proteins	Nucleoplasm (Approved)				0.0	0.0	0.0	0.0	0.0	0.0	0.0	0.0	0.0	0.0	0.0	0.0	0.0	0.0	0.0	0.0	0.0	0.0	0.0	0.0
FBXO22	26263	symbol	H. sapiens	26263	H. sapiens	FBXO22	F-box protein 22	GO:0048742 regulation of skeletal muscle fiber development;GO:0048741 skeletal muscle fiber development;GO:0014904 myotube cell development		Predicted intracellular proteins					0.0	0.0	0.0	1.0	0.0	0.0	0.0	0.0	1.0	0.0	0.0	0.0	0.0	0.0	0.0	0.0	0.0	0.0	0.0	0.0
FENDRR	400550	symbol	H. sapiens	400550	H. sapiens	FENDRR	FOXF1 adjacent non-coding developmental regulatory RNA								0.0	0.0	0.0	0.0	0.0	0.0	0.0	0.0	0.0	0.0	0.0	0.0	0.0	0.0	0.0	0.0	0.0	0.0	0.0	0.0
FEZF2	55079	symbol	H. sapiens	55079	H. sapiens	FEZF2	FEZ family zinc finger 2	GO:0021797 forebrain anterior/posterior pattern specification;GO:0021853 cerebral cortex GABAergic interneuron migration;GO:0021902 commitment of neuronal cell to specific neuron type in forebrain		Transcription factors:Zinc-coordinating DNA-binding domains; Predicted intracellular proteins					1.0	0.0	0.0	0.0	1.0	0.0	0.0	0.0	0.0	0.0	1.0	0.0	0.0	0.0	0.0	0.0	0.0	0.0	1.0	1.0
FGF5	2250	symbol	H. sapiens	2250	H. sapiens	FGF5	fibroblast growth factor 5	GO:0023019 signal transduction involved in regulation of gene expression;GO:0008543 fibroblast growth factor receptor signaling pathway;GO:0051781 positive regulation of cell division		Predicted secreted proteins; Disease related genes; RAS pathway related proteins	Nucleoli fibrillar center (Supported); Additional: Cytosol;Nucleoplasm		(M5883)NABA SECRETED FACTORS; (M5885)NABA MATRISOME ASSOCIATED; (M5889)NABA MATRISOME		0.0	0.0	0.0	0.0	0.0	0.0	1.0	0.0	0.0	0.0	0.0	0.0	0.0	0.0	0.0	0.0	0.0	0.0	0.0	1.0
FGFR1	2260	symbol	H. sapiens	2260	H. sapiens	FGFR1	fibroblast growth factor receptor 1	GO:1904849 positive regulation of cell chemotaxis to fibroblast growth factor;GO:2000546 positive regulation of endothelial cell chemotaxis to fibroblast growth factor;GO:0035768 endothelial cell chemotaxis to fibroblast growth factor	Tyr protein kinase family	Cancer-related genes:Candidate cancer biomarkers; ENZYME proteins:Transferases; Kinases:Tyr protein kinases; CD markers; RAS pathway related proteins; Transporters:Accessory Factors Involved in Transport; Predicted intracellular proteins; FDA approved drug targets:Small molecule drugs; Enzymes; Disease related genes		Palifermin; Sorafenib; Heparin; 3-[4-(1-formylpiperazin-4-yl)-benzylidenyl]-2-indolinone; XL999; 3-(3-methoxybenzyl)-1H-pyrrolo[2,3-b]pyridine; (E)-[4-(3,5-Difluorophenyl)-3H-pyrrolo[2,3-b]pyridin-3-ylidene](3-methoxyphenyl)methanol; 3-[(3-(2-CARBOXYETHYL)-4-METHYLPYRROL-2-YL)METHYLENE]-2-INDOLINONE; Regorafenib; Ponatinib; Lenvatinib; Nintedanib; Fostamatinib; Erdafitinib; Pemigatinib; Selpercat…	(M33)PID GLYPICAN 1PATHWAY; (M165)PID SYNDECAN 4 PATHWAY; (M266)PID NCADHERIN PATHWAY	(M5944)HALLMARK ANGIOGENESIS	1.0	0.0	0.0	1.0	0.0	0.0	1.0	0.0	0.0	0.0	0.0	0.0	0.0	0.0	0.0	0.0	1.0	0.0	1.0	1.0
FHOD1	29109	symbol	H. sapiens	29109	H. sapiens	FHOD1	formin homology 2 domain containing 1	GO:0051660 establishment of centrosome localization;GO:0051639 actin filament network formation;GO:0007097 nuclear migration		Predicted intracellular proteins	Cytosol (Supported)				0.0	0.0	0.0	0.0	0.0	0.0	0.0	0.0	0.0	0.0	0.0	0.0	0.0	0.0	0.0	0.0	0.0	0.0	0.0	0.0
FLJ23867						None	None	None	None	None	None	None	None	None	nan	nan	nan	nan	nan	nan	nan	nan	nan	nan	nan	nan	nan	nan	nan	nan	nan	nan	nan	nan
FLRT1	23769	symbol	H. sapiens	23769	H. sapiens	FLRT1	fibronectin leucine rich transmembrane protein 1	GO:0008543 fibroblast growth factor receptor signaling pathway;GO:0044344 cellular response to fibroblast growth factor stimulus;GO:0071774 response to fibroblast growth factor							0.0	0.0	0.0	0.0	0.0	0.0	0.0	0.0	0.0	0.0	1.0	0.0	0.0	1.0	0.0	0.0	0.0	0.0	0.0	1.0
FOS	2353	symbol	H. sapiens	2353	H. sapiens	FOS	Fos proto-oncogene, AP-1 transcription factor subunit	GO:0001661 conditioned taste aversion;GO:0009629 response to gravity;GO:0051412 response to corticosterone		Cancer-related genes:Candidate cancer biomarkers; Predicted intracellular proteins; Transcription factors:Basic domains	Nucleoplasm (Supported)	Nadroparin	(M134)PID TCR RAS PATHWAY; (M206)PID PDGFRA PATHWAY; (M268)PID S1P S1P2 PATHWAY	(M5941)HALLMARK UV RESPONSE UP; (M5890)HALLMARK TNFA SIGNALING VIA NFKB; (M5891)HALLMARK HYPOXIA	1.0	0.0	1.0	1.0	0.0	0.0	1.0	0.0	0.0	0.0	0.0	0.0	0.0	0.0	0.0	0.0	0.0	1.0	0.0	1.0
FOSB	2354	symbol	H. sapiens	2354	H. sapiens	FOSB	FosB proto-oncogene, AP-1 transcription factor subunit	GO:0051412 response to corticosterone;GO:0014072 response to isoquinoline alkaloid;GO:0043278 response to morphine		Predicted intracellular proteins; Transcription factors:Basic domains	Nucleoplasm (Supported); Additional: Vesicles		(M167)PID AP1 PATHWAY	(M5941)HALLMARK UV RESPONSE UP; (M5890)HALLMARK TNFA SIGNALING VIA NFKB	1.0	0.0	0.0	0.0	0.0	0.0	0.0	0.0	0.0	0.0	0.0	0.0	0.0	0.0	0.0	0.0	0.0	0.0	0.0	0.0
FOXC1	2296	symbol	H. sapiens	2296	H. sapiens	FOXC1	forkhead box C1	GO:1902038 positive regulation of hematopoietic stem cell differentiation;GO:1902257 negative regulation of apoptotic process involved in outflow tract morphogenesis;GO:1901491 negative regulation of lymphangiogenesis		Predicted intracellular proteins; Disease related genes; Transcription factors:Helix-turn-helix domains	Nucleoplasm (Supported); Additional: Cytosol			(M5906)HALLMARK ESTROGEN RESPONSE EARLY; (M5907)HALLMARK ESTROGEN RESPONSE LATE	1.0	0.0	0.0	1.0	1.0	0.0	0.0	0.0	0.0	1.0	0.0	1.0	0.0	1.0	0.0	0.0	1.0	0.0	1.0	1.0
FOXE3	2301	symbol	H. sapiens	2301	H. sapiens	FOXE3	forkhead box E3	GO:0002930 trabecular meshwork development;GO:0097166 lens epithelial cell proliferation;GO:2001109 regulation of lens epithelial cell proliferation		Predicted intracellular proteins; Disease related genes; Transcription factors:Helix-turn-helix domains					1.0	0.0	0.0	0.0	0.0	0.0	0.0	0.0	0.0	1.0	0.0	1.0	0.0	0.0	0.0	0.0	1.0	0.0	0.0	0.0
FSD1	79187	symbol	H. sapiens	79187	H. sapiens	FSD1	fibronectin type III and SPRY domain containing 1	GO:0060236 regulation of mitotic spindle organization;GO:0090224 regulation of spindle organization;GO:0031122 cytoplasmic microtubule organization		Predicted intracellular proteins					0.0	0.0	0.0	0.0	0.0	0.0	0.0	0.0	0.0	0.0	0.0	0.0	0.0	0.0	0.0	0.0	0.0	0.0	0.0	0.0
FUT10	84750	symbol	H. sapiens	84750	H. sapiens	FUT10	fucosyltransferase 10	GO:0019317 fucose catabolic process;GO:0042354 L-fucose metabolic process;GO:0042355 L-fucose catabolic process		Predicted intracellular proteins	Endoplasmic reticulum;Golgi apparatus;Nucleoplasm (Approved)				0.0	0.0	0.0	0.0	0.0	0.0	0.0	0.0	0.0	0.0	0.0	0.0	0.0	0.0	0.0	0.0	0.0	0.0	0.0	0.0
FZD2	2535	symbol	H. sapiens	2535	H. sapiens	FZD2	frizzled class receptor 2	GO:0003150 muscular septum morphogenesis;GO:0003149 membranous septum morphogenesis;GO:0060022 hard palate development		Cancer-related genes:Candidate cancer biomarkers; G-protein coupled receptors:Family fz/smo receptors; G-protein coupled receptors:GPCRs excl olfactory receptors	Nuclear bodies;Nucleoplasm (Approved); Additional: Cell Junctions		(M77)PID WNT SIGNALING PATHWAY; (M23)PID WNT NONCANONICAL PATHWAY; (M5493)WNT SIGNALING	(M5942)HALLMARK UV RESPONSE DN	1.0	0.0	0.0	1.0	0.0	0.0	1.0	0.0	0.0	1.0	0.0	1.0	0.0	0.0	0.0	1.0	0.0	0.0	0.0	0.0
FZD9	8326	symbol	H. sapiens	8326	H. sapiens	FZD9	frizzled class receptor 9	GO:1903910 negative regulation of receptor clustering;GO:1904394 negative regulation of skeletal muscle acetylcholine-gated channel clustering;GO:1990523 bone regeneration		G-protein coupled receptors:Family fz/smo receptors; G-protein coupled receptors:GPCRs excl olfactory receptors; CD markers			(M77)PID WNT SIGNALING PATHWAY		0.0	0.0	0.0	0.0	0.0	0.0	1.0	0.0	0.0	0.0	0.0	0.0	1.0	1.0	1.0	1.0	1.0	1.0	0.0	1.0
G6PD	2539	symbol	H. sapiens	2539	H. sapiens	G6PD	glucose-6-phosphate dehydrogenase	GO:0010731 protein glutathionylation;GO:0010732 regulation of protein glutathionylation;GO:0010734 negative regulation of protein glutathionylation		Cancer-related genes:Candidate cancer biomarkers; Predicted intracellular proteins; Enzymes; ENZYME proteins:Oxidoreductases; Disease related genes; Potential drug targets	Cytosol (Enhanced); Additional: Centriolar satellite	Glycolic acid; Nicotinamide adenine dinucleotide phosphate; 16-Bromoepiandrosterone; Artenimol		(M5938)HALLMARK REACTIVE OXYGEN SPECIES PATHWAY; (M5924)HALLMARK MTORC1 SIGNALING; (M5937)HALLMARK GLYCOLYSIS	1.0	0.0	0.0	1.0	1.0	0.0	0.0	0.0	0.0	0.0	0.0	0.0	0.0	1.0	0.0	0.0	0.0	1.0	0.0	0.0
GADD45A	1647	symbol	H. sapiens	1647	H. sapiens	GADD45A	growth arrest and DNA damage inducible alpha	GO:0033140 negative regulation of peptidyl-serine phosphorylation of STAT protein;GO:0033139 regulation of peptidyl-serine phosphorylation of STAT protein;GO:0042501 serine phosphorylation of STAT protein		Cancer-related genes:Candidate cancer biomarkers; Predicted intracellular proteins	Nuclear speckles (Supported)		(M20)PID P38 MKK3 6PATHWAY; (M242)PID AURORA A PATHWAY; (M12012)ST P38 MAPK PATHWAY	(M5902)HALLMARK APOPTOSIS; (M5890)HALLMARK TNFA SIGNALING VIA NFKB; (M5905)HALLMARK ADIPOGENESIS	0.0	0.0	1.0	0.0	0.0	0.0	1.0	0.0	1.0	0.0	0.0	0.0	0.0	0.0	0.0	0.0	0.0	0.0	0.0	0.0
GALNT16	57452	symbol	H. sapiens	57452	H. sapiens	GALNT16	polypeptide N-acetylgalactosaminyltransferase 16	GO:0018243 protein O-linked glycosylation via threonine;GO:0018242 protein O-linked glycosylation via serine;GO:0006493 protein O-linked glycosylation		ENZYME proteins:Transferases; Predicted intracellular proteins; Enzymes	Cytosol;Vesicles (Approved)				0.0	0.0	0.0	0.0	0.0	0.0	0.0	0.0	0.0	0.0	0.0	0.0	0.0	0.0	0.0	0.0	0.0	0.0	0.0	0.0
GALNT3	2591	symbol	H. sapiens	2591	H. sapiens	GALNT3	polypeptide N-acetylgalactosaminyltransferase 3	GO:0018243 protein O-linked glycosylation via threonine;GO:0018242 protein O-linked glycosylation via serine;GO:0016266 O-glycan processing		ENZYME proteins:Transferases; Predicted intracellular proteins; Enzymes; Disease related genes; Potential drug targets	Golgi apparatus (Supported)			(M5953)HALLMARK KRAS SIGNALING UP	0.0	0.0	0.0	0.0	0.0	0.0	0.0	0.0	0.0	0.0	0.0	0.0	0.0	0.0	0.0	0.0	0.0	0.0	0.0	1.0
GATSL3	652968	gene_synonym	H. sapiens	652968	H. sapiens	CASTOR1	cytosolic arginine sensor for mTORC1 subunit 1	GO:1903577 cellular response to L-arginine;GO:1903576 response to L-arginine;GO:1904262 negative regulation of TORC1 signaling		Predicted intracellular proteins					1.0	0.0	0.0	0.0	0.0	0.0	0.0	0.0	0.0	0.0	0.0	0.0	0.0	0.0	0.0	0.0	0.0	0.0	0.0	0.0
GBX2	2637	symbol	H. sapiens	2637	H. sapiens	GBX2	gastrulation brain homeobox 2	GO:0021568 rhombomere 2 development;GO:0021555 midbrain-hindbrain boundary morphogenesis;GO:0021546 rhombomere development		Predicted intracellular proteins; Transcription factors:Helix-turn-helix domains	Nucleoplasm (Approved)				1.0	0.0	0.0	1.0	1.0	0.0	0.0	0.0	0.0	1.0	1.0	0.0	0.0	0.0	1.0	0.0	0.0	0.0	1.0	0.0
GCAT	23464	symbol	H. sapiens	23464	H. sapiens	GCAT	glycine C-acetyltransferase	GO:0019518 L-threonine catabolic process to glycine;GO:0006567 threonine catabolic process;GO:0006566 threonine metabolic process		ENZYME proteins:Transferases; Predicted intracellular proteins; Enzymes	Nucleoplasm (Supported); Additional: Mitochondria;Nuclear speckles	Pyridoxal phosphate; Glycine			0.0	0.0	0.0	0.0	0.0	0.0	0.0	0.0	0.0	0.0	0.0	0.0	0.0	0.0	0.0	0.0	0.0	0.0	0.0	0.0
GCDH	2639	symbol	H. sapiens	2639	H. sapiens	GCDH	glutaryl-CoA dehydrogenase	GO:0033539 fatty acid beta-oxidation using acyl-CoA dehydrogenase;GO:0006568 tryptophan metabolic process;GO:0006586 indolalkylamine metabolic process		Predicted intracellular proteins; Enzymes; ENZYME proteins:Oxidoreductases; Disease related genes; Potential drug targets	Mitochondria (Supported)	Flavin adenine dinucleotide; S-4-Nitrobutyryl-CoA		(M5935)HALLMARK FATTY ACID METABOLISM	0.0	0.0	0.0	0.0	0.0	0.0	0.0	0.0	0.0	0.0	0.0	0.0	0.0	0.0	0.0	0.0	0.0	0.0	0.0	0.0
GCLC	2729	symbol	H. sapiens	2729	H. sapiens	GCLC	glutamate-cysteine ligase catalytic subunit	GO:0097069 cellular response to thyroxine stimulus;GO:1904387 cellular response to L-phenylalanine derivative;GO:2000490 negative regulation of hepatic stellate cell activation		ENZYME proteins:Ligase; Predicted intracellular proteins; Enzymes; Disease related genes; Potential drug targets	Nucleoplasm (Approved); Additional: Cytosol;Nucleoli	Glutamic acid; Cysteine		(M5938)HALLMARK REACTIVE OXYGEN SPECIES PATHWAY; (M5924)HALLMARK MTORC1 SIGNALING; (M5934)HALLMARK XENOBIOTIC METABOLISM	0.0	0.0	0.0	0.0	0.0	0.0	0.0	0.0	0.0	0.0	0.0	0.0	0.0	0.0	0.0	0.0	0.0	1.0	0.0	1.0
GCNT4	51301	symbol	H. sapiens	51301	H. sapiens	GCNT4	glucosaminyl (N-acetyl) transferase 4	GO:0002121 inter-male aggressive behavior;GO:0002118 aggressive behavior;GO:0042403 thyroid hormone metabolic process		ENZYME proteins:Transferases; Predicted intracellular proteins; Enzymes	Golgi apparatus (Supported); Additional: Nucleoplasm				0.0	0.0	0.0	1.0	0.0	0.0	0.0	0.0	0.0	0.0	0.0	0.0	0.0	0.0	0.0	0.0	0.0	0.0	0.0	0.0
GCSH	2653	symbol	H. sapiens	2653	H. sapiens	GCSH	glycine cleavage system protein H	GO:0006546 glycine catabolic process;GO:0019464 glycine decarboxylation via glycine cleavage system;GO:0009249 protein lipoylation		Predicted intracellular proteins; Disease related genes	Vesicles (Approved)	6-(Hydroxyethyldithio)-8-(Aminomethylthio)Octanoic Acid; Dihydrolipoic Acid			0.0	0.0	0.0	0.0	0.0	0.0	0.0	0.0	0.0	0.0	0.0	0.0	0.0	0.0	0.0	0.0	0.0	0.0	0.0	0.0
GDF5	8200	symbol	H. sapiens	8200	H. sapiens	GDF5	growth differentiation factor 5	GO:0060591 chondroblast differentiation;GO:0043932 ossification involved in bone remodeling;GO:2001054 negative regulation of mesenchymal cell apoptotic process		Predicted secreted proteins; Disease related genes			(M5883)NABA SECRETED FACTORS; (M5885)NABA MATRISOME ASSOCIATED; (M5889)NABA MATRISOME		1.0	0.0	0.0	1.0	0.0	0.0	1.0	0.0	0.0	0.0	0.0	0.0	0.0	1.0	0.0	0.0	1.0	1.0	0.0	1.0
GHRLOS	100126793	symbol	H. sapiens	100126793	H. sapiens	GHRLOS	ghrelin opposite strand/antisense RNA								0.0	0.0	0.0	0.0	0.0	0.0	0.0	0.0	0.0	0.0	0.0	0.0	0.0	0.0	0.0	0.0	0.0	0.0	0.0	0.0
GLCCI1	113263	symbol	H. sapiens	113263	H. sapiens	GLCCI1	glucocorticoid induced 1			Predicted intracellular proteins	Nucleoli (Approved)				0.0	0.0	0.0	0.0	0.0	0.0	0.0	0.0	0.0	0.0	0.0	0.0	0.0	0.0	0.0	0.0	0.0	0.0	0.0	0.0
GOLGA3	2802	symbol	H. sapiens	2802	H. sapiens	GOLGA3	golgin A3	GO:0007283 spermatogenesis;GO:0048232 male gamete generation;GO:0007276 gamete generation		Predicted intracellular proteins	Golgi apparatus (Supported); Additional: Nucleoplasm				1.0	0.0	0.0	0.0	0.0	0.0	0.0	0.0	0.0	0.0	0.0	0.0	0.0	0.0	0.0	0.0	0.0	0.0	0.0	0.0
GPR162	27239	symbol	H. sapiens	27239	H. sapiens	GPR162	G protein-coupled receptor 162	GO:0007186 G protein-coupled receptor signaling pathway;GO:0007165 signal transduction;GO:0023052 signaling		Predicted intracellular proteins; G-protein coupled receptors:GPCRs excl olfactory receptors	Centriolar satellite (Approved)				0.0	0.0	0.0	0.0	0.0	0.0	0.0	0.0	0.0	0.0	0.0	0.0	0.0	0.0	0.0	0.0	0.0	0.0	0.0	0.0
GPR39	2863	symbol	H. sapiens	2863	H. sapiens	GPR39	G protein-coupled receptor 39	GO:0007186 G protein-coupled receptor signaling pathway;GO:0007165 signal transduction;GO:0023052 signaling		G-protein coupled receptors:GPCRs excl olfactory receptors					0.0	0.0	0.0	0.0	0.0	0.0	0.0	0.0	0.0	0.0	0.0	0.0	0.0	0.0	0.0	0.0	0.0	0.0	0.0	0.0
GPRC5A	9052	symbol	H. sapiens	9052	H. sapiens	GPRC5A	G protein-coupled receptor class C group 5 member A	GO:0007175 negative regulation of epidermal growth factor-activated receptor activity;GO:0042059 negative regulation of epidermal growth factor receptor signaling pathway;GO:0007176 regulation of epidermal growth factor-activated receptor activity		Predicted intracellular proteins; G-protein coupled receptors:Family 3 (C) receptors; G-protein coupled receptors:GPCRs excl olfactory receptors	Plasma membrane;Vesicles (Enhanced)	Tretinoin			0.0	0.0	0.0	0.0	0.0	0.0	0.0	0.0	0.0	0.0	0.0	0.0	0.0	0.0	0.0	0.0	0.0	0.0	0.0	0.0
GRHPR	9380	symbol	H. sapiens	9380	H. sapiens	GRHPR	glyoxylate and hydroxypyruvate reductase	GO:0046487 glyoxylate metabolic process;GO:0006081 cellular aldehyde metabolic process;GO:0007588 excretion		Predicted intracellular proteins; Enzymes; ENZYME proteins:Oxidoreductases; Disease related genes; Potential drug targets	Cytosol (Approved); Additional: Nucleoplasm			(M5935)HALLMARK FATTY ACID METABOLISM; (M5891)HALLMARK HYPOXIA	0.0	0.0	0.0	0.0	0.0	0.0	0.0	0.0	0.0	0.0	0.0	0.0	0.0	0.0	0.0	0.0	0.0	0.0	0.0	0.0
GRIA1	2890	symbol	H. sapiens	2890	H. sapiens	GRIA1	glutamate ionotropic receptor AMPA type subunit 1	GO:0071242 cellular response to ammonium ion;GO:0060359 response to ammonium ion;GO:0099566 regulation of postsynaptic cytosolic calcium ion concentration		FDA approved drug targets:Small molecule drugs		Glutamic acid; Butabarbital; Lamotrigine; Isoflurane; Ethanol; Methoxyflurane; Desflurane; Sevoflurane; Talampanel; CX717; CX516; Perampanel; Tianeptine; Fluciclovine (18F)	(M62)PID EPHB FWD PATHWAY		0.0	0.0	0.0	0.0	0.0	0.0	0.0	0.0	0.0	0.0	0.0	0.0	0.0	0.0	0.0	1.0	0.0	0.0	0.0	0.0
GRM4	2914	symbol	H. sapiens	2914	H. sapiens	GRM4	glutamate metabotropic receptor 4	GO:0007196 adenylate cyclase-inhibiting G protein-coupled glutamate receptor signaling pathway;GO:0007216 G protein-coupled glutamate receptor signaling pathway;GO:0007215 glutamate receptor signaling pathway		Predicted intracellular proteins; G-protein coupled receptors:Family 3 (C) receptors; G-protein coupled receptors:GPCRs excl olfactory receptors		Glutamic acid			0.0	0.0	0.0	0.0	0.0	0.0	0.0	0.0	0.0	0.0	0.0	0.0	0.0	0.0	0.0	0.0	0.0	1.0	0.0	0.0
GSR	2936	symbol	H. sapiens	2936	H. sapiens	GSR	glutathione-disulfide reductase	GO:0045454 cell redox homeostasis;GO:0006749 glutathione metabolic process;GO:0098869 cellular oxidant detoxification		Cancer-related genes:Candidate cancer biomarkers; Predicted intracellular proteins; FDA approved drug targets:Small molecule drugs; Enzymes; ENZYME proteins:Oxidoreductases	Cytosol (Supported)	Glutathione; NADH; Carmustine; 3,6-dihydroxy-xanthene-9-propionic acid; 3-sulfino-L-alanine; Glutathionylspermidine disulfide; 3-(Prop-2-Ene-1-Sulfinyl)-Propene-1-Thiol; Flavin adenine dinucleotide; Glutathione disulfide; 3-nitro-L-tyrosine; 2-(2-PHENYL-3-PYRIDIN-2-YL-4,5,6,7-TETRAHYDRO-2H-ISOPHOSPHINDOL-1-YL)PYRIDINE; 6-(3-METHYL-1,4-DIOXO-1,4-DIHYDRONAPHTHALEN-2-YL)HEXANOIC ACID; Cannabidiol; C…		(M5938)HALLMARK REACTIVE OXYGEN SPECIES PATHWAY; (M5908)HALLMARK ANDROGEN RESPONSE; (M5902)HALLMARK APOPTOSIS	1.0	0.0	0.0	0.0	0.0	0.0	0.0	0.0	0.0	0.0	0.0	0.0	0.0	0.0	0.0	0.0	0.0	0.0	0.0	0.0
GTF3C1	2975	symbol	H. sapiens	2975	H. sapiens	GTF3C1	general transcription factor IIIC subunit 1	GO:0042791 5S class rRNA transcription by RNA polymerase III;GO:0042797 tRNA transcription by RNA polymerase III;GO:0006384 transcription initiation from RNA polymerase III promoter		Predicted intracellular proteins	Nucleoli;Nucleoplasm (Approved)				1.0	0.0	0.0	0.0	0.0	0.0	0.0	0.0	0.0	0.0	0.0	0.0	0.0	0.0	0.0	0.0	0.0	0.0	0.0	0.0
H2AFY2	55506	gene_synonym	H. sapiens	55506	H. sapiens	MACROH2A2	macroH2A.2 histone	GO:1901837 negative regulation of transcription of nucleolar large rRNA by RNA polymerase I;GO:0016479 negative regulation of transcription by RNA polymerase I;GO:0071169 establishment of protein localization to chromatin		Predicted intracellular proteins	Nucleoplasm (Supported)			(M5956)HALLMARK KRAS SIGNALING DN	1.0	1.0	1.0	0.0	1.0	0.0	1.0	0.0	0.0	0.0	0.0	1.0	0.0	0.0	0.0	0.0	0.0	0.0	0.0	0.0
HAAO	23498	symbol	H. sapiens	23498	H. sapiens	HAAO	3-hydroxyanthranilate 3,4-dioxygenase	GO:0043420 anthranilate metabolic process;GO:0019805 quinolinate biosynthetic process;GO:0046874 quinolinate metabolic process		Predicted intracellular proteins; Enzymes; ENZYME proteins:Oxidoreductases; Disease related genes; Potential drug targets					0.0	0.0	0.0	0.0	0.0	0.0	0.0	0.0	0.0	0.0	0.0	0.0	0.0	0.0	0.0	0.0	0.0	0.0	0.0	0.0
HAS2-AS1	594842	symbol	H. sapiens	594842	H. sapiens	HAS2-AS1	HAS2 antisense RNA 1								0.0	0.0	0.0	0.0	0.0	0.0	0.0	0.0	0.0	0.0	0.0	0.0	0.0	0.0	0.0	0.0	0.0	0.0	0.0	0.0
HBEGF	1839	symbol	H. sapiens	1839	H. sapiens	HBEGF	heparin binding EGF like growth factor	GO:0051543 regulation of elastin biosynthetic process;GO:0051545 negative regulation of elastin biosynthetic process;GO:0051542 elastin biosynthetic process		Predicted secreted proteins			(M201)PID ERBB NETWORK PATHWAY; (M13)PID ERBB4 PATHWAY; (M41)PID ER NONGENOMIC PATHWAY	(M5890)HALLMARK TNFA SIGNALING VIA NFKB; (M5909)HALLMARK MYOGENESIS; (M5932)HALLMARK INFLAMMATORY RESPONSE	1.0	0.0	0.0	1.0	0.0	0.0	1.0	0.0	0.0	0.0	0.0	0.0	0.0	1.0	0.0	0.0	0.0	0.0	0.0	0.0
HCN2	610	symbol	H. sapiens	610	H. sapiens	HCN2	hyperpolarization activated cyclic nucleotide gated potassium and sodium channel 2	GO:0071321 cellular response to cGMP;GO:0070305 response to cGMP;GO:0098719 sodium ion import across plasma membrane		Transporters:Transporter channels and pores; Voltage-gated ion channels:Cyclic Nucleotide-Regulated Channels		Cyclic GMP; Cyclic adenosine monophosphate; Ivabradine			0.0	0.0	0.0	0.0	0.0	0.0	0.0	0.0	0.0	0.0	0.0	0.0	0.0	0.0	0.0	0.0	0.0	0.0	0.0	0.0
HELZ	9931	symbol	H. sapiens	9931	H. sapiens	HELZ	helicase with zinc finger	GO:0035194 post-transcriptional gene silencing by RNA;GO:0016441 posttranscriptional gene silencing;GO:0031047 gene silencing by RNA		Predicted intracellular proteins	Nucleoli;Nucleoli rim (Approved); Additional: Actin filaments;Plasma membrane				0.0	1.0	0.0	0.0	0.0	0.0	0.0	0.0	0.0	0.0	0.0	0.0	0.0	0.0	0.0	0.0	0.0	0.0	0.0	0.0
HES4	57801	symbol	H. sapiens	57801	H. sapiens	HES4	hes family bHLH transcription factor 4	GO:0009952 anterior/posterior pattern specification;GO:0003002 regionalization;GO:0007389 pattern specification process		Predicted intracellular proteins; Transcription factors:Basic domains	Nucleoplasm (Approved); Additional: Cytosol;Vesicles				0.0	0.0	0.0	0.0	0.0	0.0	0.0	0.0	0.0	0.0	0.0	0.0	0.0	0.0	0.0	0.0	0.0	0.0	1.0	0.0
HES5	388585	symbol	H. sapiens	388585	H. sapiens	HES5	hes family bHLH transcription factor 5	GO:2000978 negative regulation of forebrain neuron differentiation;GO:1905457 negative regulation of lymphoid progenitor cell differentiation;GO:2000974 negative regulation of pro-B cell differentiation		Predicted intracellular proteins; Transcription factors:Basic domains	Nucleoplasm (Approved); Additional: Cytosol;Nuclear speckles		(M81)PID CDC42 PATHWAY		1.0	0.0	0.0	1.0	1.0	0.0	1.0	0.0	0.0	1.0	1.0	1.0	0.0	0.0	0.0	0.0	1.0	0.0	1.0	1.0
HID1	283987	symbol	H. sapiens	283987	H. sapiens	HID1	HID1 domain containing			Predicted intracellular proteins	Cytosol;Golgi apparatus (Supported)				0.0	0.0	0.0	0.0	0.0	0.0	0.0	0.0	0.0	0.0	0.0	0.0	0.0	0.0	0.0	0.0	0.0	0.0	0.0	0.0
HIST1H1B	3009	gene_synonym	H. sapiens	3009	H. sapiens	H1-5	H1.5 linker histone, cluster member	GO:0071169 establishment of protein localization to chromatin;GO:0051574 positive regulation of histone H3-K9 methylation;GO:0031936 negative regulation of chromatin silencing		Predicted intracellular proteins	Nucleoplasm (Supported)				1.0	1.0	1.0	0.0	0.0	0.0	0.0	1.0	0.0	0.0	0.0	0.0	0.0	1.0	0.0	0.0	0.0	0.0	0.0	0.0
HIST1H1C	3006	gene_synonym	H. sapiens	3006	H. sapiens	H1-2	H1.2 linker histone, cluster member	GO:0098532 histone H3-K27 trimethylation;GO:0031936 negative regulation of chromatin silencing;GO:0016584 nucleosome positioning		Predicted intracellular proteins	Nucleoli rim;Nucleoplasm (Supported)			(M5939)HALLMARK P53 PATHWAY	1.0	1.0	1.0	0.0	0.0	0.0	0.0	1.0	0.0	0.0	0.0	0.0	0.0	0.0	0.0	0.0	0.0	0.0	0.0	0.0
HIST1H1D	3007	gene_synonym	H. sapiens	3007	H. sapiens	H1-3	H1.3 linker histone, cluster member	GO:0031936 negative regulation of chromatin silencing;GO:0016584 nucleosome positioning;GO:0031935 regulation of chromatin silencing		Predicted intracellular proteins					1.0	1.0	1.0	0.0	0.0	0.0	0.0	1.0	0.0	0.0	0.0	0.0	0.0	0.0	0.0	0.0	0.0	0.0	0.0	0.0
HIST1H1E	3008	gene_synonym	H. sapiens	3008	H. sapiens	H1-4	H1.4 linker histone, cluster member	GO:0031936 negative regulation of chromatin silencing;GO:0016584 nucleosome positioning;GO:0031935 regulation of chromatin silencing		Cancer-related genes:Mutated cancer genes; Predicted intracellular proteins; Disease related genes	Nuclear speckles (Supported)	Copper	(M32)PID HDAC CLASSIII PATHWAY		1.0	1.0	1.0	0.0	0.0	0.0	0.0	1.0	1.0	0.0	0.0	0.0	0.0	0.0	0.0	0.0	0.0	0.0	0.0	0.0
HIST1H2AB	8335	gene_synonym	H. sapiens	8335	H. sapiens	H2AC4	H2A clustered histone 4	GO:0006342 chromatin silencing;GO:0045814 negative regulation of gene expression, epigenetic;GO:0097549 chromatin organization involved in negative regulation of transcription		Predicted intracellular proteins	Nucleoplasm (Approved)				1.0	1.0	0.0	0.0	0.0	0.0	0.0	0.0	0.0	0.0	0.0	0.0	0.0	0.0	0.0	0.0	0.0	0.0	0.0	0.0
HIST1H2AC	8334	gene_synonym	H. sapiens	8334	H. sapiens	H2AC6	H2A clustered histone 6	GO:0006342 chromatin silencing;GO:0045814 negative regulation of gene expression, epigenetic;GO:0097549 chromatin organization involved in negative regulation of transcription		Cancer-related genes:Candidate cancer biomarkers; Predicted intracellular proteins	Nucleoplasm (Approved)				1.0	1.0	0.0	0.0	0.0	0.0	0.0	0.0	0.0	0.0	0.0	0.0	0.0	0.0	0.0	0.0	0.0	0.0	0.0	0.0
HIST1H2AD	3013	gene_synonym	H. sapiens	3013	H. sapiens	H2AC7	H2A clustered histone 7	GO:0006342 chromatin silencing;GO:0045814 negative regulation of gene expression, epigenetic;GO:0097549 chromatin organization involved in negative regulation of transcription		Predicted intracellular proteins	Nucleoplasm (Approved)				1.0	1.0	0.0	0.0	0.0	0.0	0.0	0.0	0.0	0.0	0.0	0.0	0.0	0.0	0.0	0.0	0.0	0.0	0.0	0.0
HIST1H2AE	3012	gene_synonym	H. sapiens	3012	H. sapiens	H2AC8	H2A clustered histone 8	GO:0006342 chromatin silencing;GO:0045814 negative regulation of gene expression, epigenetic;GO:0097549 chromatin organization involved in negative regulation of transcription		Predicted intracellular proteins	Nucleoplasm (Supported)				1.0	1.0	0.0	0.0	0.0	0.0	0.0	0.0	0.0	0.0	0.0	0.0	0.0	0.0	0.0	0.0	0.0	0.0	0.0	0.0
HIST1H2AG	8969	gene_synonym	H. sapiens	8969	H. sapiens	H2AC11	H2A clustered histone 11	GO:0006342 chromatin silencing;GO:0045814 negative regulation of gene expression, epigenetic;GO:0097549 chromatin organization involved in negative regulation of transcription		Predicted intracellular proteins	Nucleoplasm (Approved)				1.0	1.0	0.0	0.0	0.0	0.0	0.0	0.0	0.0	0.0	0.0	0.0	0.0	0.0	0.0	0.0	0.0	0.0	0.0	0.0
HIST1H2AH	85235	gene_synonym	H. sapiens	85235	H. sapiens	H2AC12	H2A clustered histone 12	GO:0006342 chromatin silencing;GO:0045814 negative regulation of gene expression, epigenetic;GO:0097549 chromatin organization involved in negative regulation of transcription		Predicted intracellular proteins	Nucleoplasm (Approved)				1.0	1.0	0.0	0.0	0.0	0.0	0.0	0.0	0.0	0.0	0.0	0.0	0.0	0.0	0.0	0.0	0.0	0.0	0.0	0.0
HIST1H2AI	8329	gene_synonym	H. sapiens	8329	H. sapiens	H2AC13	H2A clustered histone 13	GO:0006342 chromatin silencing;GO:0045814 negative regulation of gene expression, epigenetic;GO:0097549 chromatin organization involved in negative regulation of transcription		Predicted intracellular proteins	Nucleoplasm (Approved)				1.0	1.0	0.0	0.0	0.0	0.0	0.0	0.0	0.0	0.0	0.0	0.0	0.0	0.0	0.0	0.0	0.0	0.0	0.0	0.0
HIST1H2AJ	8331	gene_synonym	H. sapiens	8331	H. sapiens	H2AC14	H2A clustered histone 14			Predicted intracellular proteins	Nucleoplasm (Approved)				1.0	1.0	0.0	0.0	0.0	0.0	0.0	0.0	0.0	0.0	0.0	0.0	0.0	0.0	0.0	0.0	0.0	0.0	0.0	0.0
HIST1H2AK	8330	gene_synonym	H. sapiens	8330	H. sapiens	H2AC15	H2A clustered histone 15	GO:0006342 chromatin silencing;GO:0045814 negative regulation of gene expression, epigenetic;GO:0097549 chromatin organization involved in negative regulation of transcription		Predicted intracellular proteins	Nucleoplasm (Approved)				1.0	1.0	0.0	0.0	0.0	0.0	0.0	0.0	0.0	0.0	0.0	0.0	0.0	0.0	0.0	0.0	0.0	0.0	0.0	0.0
HIST1H2AL	8332	gene_synonym	H. sapiens	8332	H. sapiens	H2AC16	H2A clustered histone 16	GO:0006342 chromatin silencing;GO:0045814 negative regulation of gene expression, epigenetic;GO:0097549 chromatin organization involved in negative regulation of transcription		Predicted intracellular proteins	Nucleoplasm (Approved)				1.0	1.0	0.0	0.0	0.0	0.0	0.0	0.0	0.0	0.0	0.0	0.0	0.0	0.0	0.0	0.0	0.0	0.0	0.0	0.0
HIST1H2AM	8336	gene_synonym	H. sapiens	8336	H. sapiens	H2AC17	H2A clustered histone 17	GO:0006342 chromatin silencing;GO:0045814 negative regulation of gene expression, epigenetic;GO:0097549 chromatin organization involved in negative regulation of transcription		Predicted intracellular proteins	Nucleoplasm (Approved)				1.0	1.0	0.0	0.0	0.0	0.0	0.0	0.0	0.0	0.0	0.0	0.0	0.0	0.0	0.0	0.0	0.0	0.0	0.0	0.0
HIST1H2BB	3018	gene_synonym	H. sapiens	3018	H. sapiens	H2BC3	H2B clustered histone 3	GO:0006334 nucleosome assembly;GO:0034728 nucleosome organization;GO:0031497 chromatin assembly		Predicted intracellular proteins	Nucleoplasm (Approved); Additional: Cytosol			(M5953)HALLMARK KRAS SIGNALING UP	1.0	1.0	0.0	0.0	0.0	1.0	0.0	0.0	1.0	0.0	0.0	0.0	0.0	0.0	0.0	0.0	0.0	0.0	0.0	0.0
HIST1H2BC	3017	gene_synonym	H. sapiens	3017	H. sapiens	H2BC5	H2B clustered histone 5	GO:0006334 nucleosome assembly;GO:0034728 nucleosome organization;GO:0031497 chromatin assembly		Predicted intracellular proteins	Nucleoplasm (Approved); Additional: Cytosol				1.0	1.0	0.0	0.0	0.0	1.0	0.0	0.0	0.0	0.0	0.0	0.0	0.0	0.0	0.0	0.0	0.0	0.0	0.0	0.0
HIST1H2BD	3017	gene_synonym	H. sapiens	3017	H. sapiens	H2BC5	H2B clustered histone 5	GO:0006334 nucleosome assembly;GO:0034728 nucleosome organization;GO:0031497 chromatin assembly		Predicted intracellular proteins	Nucleoplasm (Approved); Additional: Cytosol				1.0	1.0	0.0	0.0	0.0	1.0	0.0	0.0	0.0	0.0	0.0	0.0	0.0	0.0	0.0	0.0	0.0	0.0	0.0	0.0
HIST1H2BE	3017	gene_synonym	H. sapiens	3017	H. sapiens	H2BC5	H2B clustered histone 5	GO:0006334 nucleosome assembly;GO:0034728 nucleosome organization;GO:0031497 chromatin assembly		Predicted intracellular proteins	Nucleoplasm (Approved); Additional: Cytosol				1.0	1.0	0.0	0.0	0.0	1.0	0.0	0.0	0.0	0.0	0.0	0.0	0.0	0.0	0.0	0.0	0.0	0.0	0.0	0.0
HIST1H2BF	3017	gene_synonym	H. sapiens	3017	H. sapiens	H2BC5	H2B clustered histone 5	GO:0006334 nucleosome assembly;GO:0034728 nucleosome organization;GO:0031497 chromatin assembly		Predicted intracellular proteins	Nucleoplasm (Approved); Additional: Cytosol				1.0	1.0	0.0	0.0	0.0	1.0	0.0	0.0	0.0	0.0	0.0	0.0	0.0	0.0	0.0	0.0	0.0	0.0	0.0	0.0
HIST1H2BG	3017	gene_synonym	H. sapiens	3017	H. sapiens	H2BC5	H2B clustered histone 5	GO:0006334 nucleosome assembly;GO:0034728 nucleosome organization;GO:0031497 chromatin assembly		Predicted intracellular proteins	Nucleoplasm (Approved); Additional: Cytosol				1.0	1.0	0.0	0.0	0.0	1.0	0.0	0.0	0.0	0.0	0.0	0.0	0.0	0.0	0.0	0.0	0.0	0.0	0.0	0.0
HIST1H2BH	8345	gene_synonym	H. sapiens	8345	H. sapiens	H2BC9	H2B clustered histone 9	GO:0006334 nucleosome assembly;GO:0034728 nucleosome organization;GO:0031497 chromatin assembly		Predicted intracellular proteins	Nucleoplasm (Approved); Additional: Cytosol				1.0	1.0	0.0	0.0	0.0	1.0	0.0	0.0	0.0	0.0	0.0	0.0	0.0	0.0	0.0	0.0	0.0	0.0	0.0	0.0
HIST1H2BI	3017	gene_synonym	H. sapiens	3017	H. sapiens	H2BC5	H2B clustered histone 5	GO:0006334 nucleosome assembly;GO:0034728 nucleosome organization;GO:0031497 chromatin assembly		Predicted intracellular proteins	Nucleoplasm (Approved); Additional: Cytosol				1.0	1.0	0.0	0.0	0.0	1.0	0.0	0.0	0.0	0.0	0.0	0.0	0.0	0.0	0.0	0.0	0.0	0.0	0.0	0.0
HIST1H2BJ	8970	gene_synonym	H. sapiens	8970	H. sapiens	H2BC11	H2B clustered histone 11	GO:0010804 negative regulation of tumor necrosis factor-mediated signaling pathway;GO:0002227 innate immune response in mucosa;GO:0002385 mucosal immune response		Predicted intracellular proteins	Nucleoplasm (Approved); Additional: Cytosol				1.0	1.0	0.0	0.0	0.0	1.0	0.0	0.0	0.0	0.0	0.0	0.0	0.0	0.0	0.0	0.0	0.0	0.0	0.0	0.0
HIST1H2BK	85236	gene_synonym	H. sapiens	85236	H. sapiens	H2BC12	H2B clustered histone 12	GO:0002227 innate immune response in mucosa;GO:0002385 mucosal immune response;GO:0002251 organ or tissue specific immune response		Predicted intracellular proteins	Nucleoplasm (Approved); Additional: Cytosol			(M5901)HALLMARK G2M CHECKPOINT	1.0	1.0	0.0	0.0	0.0	1.0	0.0	0.0	0.0	0.0	0.0	0.0	0.0	0.0	0.0	0.0	0.0	0.0	0.0	0.0
HIST1H2BL	8340	gene_synonym	H. sapiens	8340	H. sapiens	H2BC13	H2B clustered histone 13	GO:0006334 nucleosome assembly;GO:0034728 nucleosome organization;GO:0031497 chromatin assembly		Predicted intracellular proteins	Nucleoplasm (Approved); Additional: Cytosol				1.0	1.0	0.0	0.0	0.0	1.0	0.0	0.0	0.0	0.0	0.0	0.0	0.0	0.0	0.0	0.0	0.0	0.0	0.0	0.0
HIST1H2BM	8342	gene_synonym	H. sapiens	8342	H. sapiens	H2BC14	H2B clustered histone 14	GO:0006334 nucleosome assembly;GO:0034728 nucleosome organization;GO:0031497 chromatin assembly		Predicted intracellular proteins	Nucleoplasm (Approved); Additional: Cytosol				1.0	1.0	0.0	0.0	0.0	1.0	0.0	0.0	1.0	0.0	0.0	0.0	0.0	0.0	0.0	0.0	0.0	0.0	0.0	0.0
HIST1H2BN	8341	gene_synonym	H. sapiens	8341	H. sapiens	H2BC15	H2B clustered histone 15	GO:0006334 nucleosome assembly;GO:0034728 nucleosome organization;GO:0031497 chromatin assembly		Predicted intracellular proteins	Nucleoplasm (Approved); Additional: Cytosol				1.0	1.0	0.0	0.0	0.0	1.0	0.0	0.0	1.0	0.0	0.0	0.0	0.0	0.0	0.0	0.0	0.0	0.0	0.0	0.0
HIST1H2BO	8348	gene_synonym	H. sapiens	8348	H. sapiens	H2BC17	H2B clustered histone 17	GO:0006334 nucleosome assembly;GO:0034728 nucleosome organization;GO:0031497 chromatin assembly		Predicted intracellular proteins	Nucleoplasm (Approved); Additional: Cytosol				1.0	1.0	0.0	0.0	0.0	1.0	0.0	0.0	0.0	0.0	0.0	0.0	0.0	0.0	0.0	0.0	0.0	0.0	0.0	0.0
HIST1H3A	8350	gene_synonym	H. sapiens	8350	H. sapiens	H3C1	H3 clustered histone 1	GO:0006335 DNA replication-dependent nucleosome assembly;GO:0034723 DNA replication-dependent nucleosome organization;GO:0060968 regulation of gene silencing		Predicted intracellular proteins; Disease related genes					1.0	1.0	1.0	0.0	0.0	0.0	0.0	0.0	0.0	0.0	0.0	0.0	0.0	0.0	0.0	0.0	0.0	0.0	0.0	0.0
HIST1H3B	8358	gene_synonym	H. sapiens	8358	H. sapiens	H3C2	H3 clustered histone 2	GO:0006335 DNA replication-dependent nucleosome assembly;GO:0034723 DNA replication-dependent nucleosome organization;GO:0060968 regulation of gene silencing							1.0	1.0	1.0	0.0	0.0	0.0	0.0	0.0	0.0	0.0	0.0	0.0	0.0	0.0	0.0	0.0	0.0	0.0	0.0	0.0
HIST1H3C	8352	gene_synonym	H. sapiens	8352	H. sapiens	H3C3	H3 clustered histone 3	GO:0006335 DNA replication-dependent nucleosome assembly;GO:0034723 DNA replication-dependent nucleosome organization;GO:0060968 regulation of gene silencing							1.0	1.0	1.0	0.0	0.0	0.0	0.0	0.0	0.0	0.0	0.0	0.0	0.0	0.0	0.0	0.0	0.0	0.0	0.0	0.0
HIST1H3D	8351	gene_synonym	H. sapiens	8351	H. sapiens	H3C4	H3 clustered histone 4	GO:0006335 DNA replication-dependent nucleosome assembly;GO:0034723 DNA replication-dependent nucleosome organization;GO:0060968 regulation of gene silencing		Predicted intracellular proteins; Disease related genes					1.0	1.0	1.0	0.0	0.0	0.0	0.0	0.0	1.0	0.0	0.0	0.0	0.0	0.0	0.0	0.0	0.0	0.0	0.0	0.0
HIST1H3E	8353	gene_synonym	H. sapiens	8353	H. sapiens	H3C6	H3 clustered histone 6	GO:0006335 DNA replication-dependent nucleosome assembly;GO:0034723 DNA replication-dependent nucleosome organization;GO:0060968 regulation of gene silencing		Predicted intracellular proteins; Disease related genes					1.0	1.0	1.0	0.0	0.0	0.0	0.0	0.0	0.0	0.0	0.0	0.0	0.0	0.0	0.0	0.0	0.0	0.0	0.0	0.0
HIST1H3F	8968	gene_synonym	H. sapiens	8968	H. sapiens	H3C7	H3 clustered histone 7	GO:0006335 DNA replication-dependent nucleosome assembly;GO:0034723 DNA replication-dependent nucleosome organization;GO:0060968 regulation of gene silencing		Predicted intracellular proteins; Disease related genes					1.0	1.0	1.0	0.0	0.0	0.0	0.0	0.0	0.0	0.0	0.0	0.0	0.0	0.0	0.0	0.0	0.0	0.0	0.0	0.0
HIST1H3G	8355	gene_synonym	H. sapiens	8355	H. sapiens	H3C8	H3 clustered histone 8	GO:0006335 DNA replication-dependent nucleosome assembly;GO:0034723 DNA replication-dependent nucleosome organization;GO:0060968 regulation of gene silencing		Predicted intracellular proteins; Disease related genes					1.0	1.0	1.0	0.0	0.0	0.0	0.0	0.0	0.0	0.0	0.0	0.0	0.0	0.0	0.0	0.0	0.0	0.0	0.0	0.0
HIST1H3H	8357	gene_synonym	H. sapiens	8357	H. sapiens	H3C10	H3 clustered histone 10	GO:0006335 DNA replication-dependent nucleosome assembly;GO:0034723 DNA replication-dependent nucleosome organization;GO:0060968 regulation of gene silencing		Predicted intracellular proteins; Disease related genes					1.0	1.0	1.0	0.0	0.0	0.0	0.0	0.0	0.0	0.0	0.0	0.0	0.0	0.0	0.0	0.0	0.0	0.0	0.0	0.0
HIST1H3I	8354	gene_synonym	H. sapiens	8354	H. sapiens	H3C11	H3 clustered histone 11	GO:0006335 DNA replication-dependent nucleosome assembly;GO:0034723 DNA replication-dependent nucleosome organization;GO:0060968 regulation of gene silencing		Predicted intracellular proteins; Disease related genes					1.0	1.0	1.0	0.0	0.0	0.0	0.0	0.0	0.0	0.0	0.0	0.0	0.0	0.0	0.0	0.0	0.0	0.0	0.0	0.0
HIST1H3J	8356	gene_synonym	H. sapiens	8356	H. sapiens	H3C12	H3 clustered histone 12	GO:0006335 DNA replication-dependent nucleosome assembly;GO:0034723 DNA replication-dependent nucleosome organization;GO:0060968 regulation of gene silencing		Predicted intracellular proteins; Disease related genes					1.0	1.0	1.0	0.0	0.0	0.0	0.0	0.0	0.0	0.0	0.0	0.0	0.0	0.0	0.0	0.0	0.0	0.0	0.0	0.0
HIST1H4A	8359	gene_synonym	H. sapiens	8359	H. sapiens	H4C1	H4 clustered histone 1	GO:0045653 negative regulation of megakaryocyte differentiation;GO:0006335 DNA replication-dependent nucleosome assembly;GO:0034723 DNA replication-dependent nucleosome organization		Predicted intracellular proteins; Disease related genes					1.0	0.0	0.0	0.0	0.0	0.0	0.0	0.0	0.0	0.0	0.0	0.0	0.0	0.0	0.0	0.0	0.0	0.0	0.0	0.0
HIST1H4B	8366	gene_synonym	H. sapiens	8366	H. sapiens	H4C2	H4 clustered histone 2	GO:0045653 negative regulation of megakaryocyte differentiation;GO:0006335 DNA replication-dependent nucleosome assembly;GO:0034723 DNA replication-dependent nucleosome organization		Predicted intracellular proteins; Disease related genes					1.0	0.0	0.0	0.0	0.0	0.0	0.0	0.0	0.0	0.0	0.0	0.0	0.0	0.0	0.0	0.0	0.0	0.0	0.0	0.0
HIST1H4C	8364	gene_synonym	H. sapiens	8364	H. sapiens	H4C3	H4 clustered histone 3	GO:0045653 negative regulation of megakaryocyte differentiation;GO:0006335 DNA replication-dependent nucleosome assembly;GO:0034723 DNA replication-dependent nucleosome organization		Predicted intracellular proteins; Disease related genes				(M5945)HALLMARK HEME METABOLISM	1.0	0.0	0.0	0.0	0.0	0.0	0.0	0.0	0.0	0.0	0.0	0.0	0.0	0.0	0.0	0.0	0.0	0.0	0.0	0.0
HIST1H4D	8360	gene_synonym	H. sapiens	8360	H. sapiens	H4C4	H4 clustered histone 4	GO:0045653 negative regulation of megakaryocyte differentiation;GO:0006335 DNA replication-dependent nucleosome assembly;GO:0034723 DNA replication-dependent nucleosome organization		Predicted intracellular proteins; Disease related genes					1.0	0.0	0.0	0.0	0.0	0.0	0.0	0.0	0.0	0.0	0.0	0.0	0.0	0.0	0.0	0.0	0.0	0.0	0.0	0.0
HIST1H4E	8367	gene_synonym	H. sapiens	8367	H. sapiens	H4C5	H4 clustered histone 5	GO:0045653 negative regulation of megakaryocyte differentiation;GO:0006335 DNA replication-dependent nucleosome assembly;GO:0034723 DNA replication-dependent nucleosome organization		Cancer-related genes:Mutated cancer genes; Predicted intracellular proteins; Disease related genes					1.0	0.0	0.0	0.0	0.0	0.0	0.0	0.0	0.0	0.0	0.0	0.0	0.0	0.0	0.0	0.0	0.0	0.0	0.0	0.0
HIST1H4F	8361	gene_synonym	H. sapiens	8361	H. sapiens	H4C6	H4 clustered histone 6	GO:0045653 negative regulation of megakaryocyte differentiation;GO:0006335 DNA replication-dependent nucleosome assembly;GO:0034723 DNA replication-dependent nucleosome organization		Predicted intracellular proteins; Disease related genes					1.0	0.0	0.0	0.0	0.0	0.0	0.0	0.0	0.0	0.0	0.0	0.0	0.0	0.0	0.0	0.0	0.0	0.0	0.0	0.0
HIST1H4H	8365	gene_synonym	H. sapiens	8365	H. sapiens	H4C8	H4 clustered histone 8	GO:0045653 negative regulation of megakaryocyte differentiation;GO:0006335 DNA replication-dependent nucleosome assembly;GO:0034723 DNA replication-dependent nucleosome organization		Predicted intracellular proteins; Disease related genes					1.0	0.0	0.0	0.0	0.0	0.0	0.0	0.0	0.0	0.0	0.0	0.0	0.0	0.0	0.0	0.0	0.0	0.0	0.0	0.0
HIST1H4I	8294	gene_synonym	H. sapiens	8294	H. sapiens	H4C9	H4 clustered histone 9	GO:0045653 negative regulation of megakaryocyte differentiation;GO:0006335 DNA replication-dependent nucleosome assembly;GO:0034723 DNA replication-dependent nucleosome organization		Predicted intracellular proteins; Disease related genes; Cancer-related genes			(M32)PID HDAC CLASSIII PATHWAY		1.0	0.0	0.0	0.0	0.0	0.0	0.0	0.0	0.0	0.0	0.0	0.0	0.0	0.0	0.0	0.0	0.0	0.0	0.0	0.0
HIST1H4J	8363	gene_synonym	H. sapiens	8363	H. sapiens	H4C11	H4 clustered histone 11	GO:0045653 negative regulation of megakaryocyte differentiation;GO:0006335 DNA replication-dependent nucleosome assembly;GO:0034723 DNA replication-dependent nucleosome organization		Predicted intracellular proteins; Disease related genes					1.0	0.0	0.0	0.0	0.0	0.0	0.0	0.0	0.0	0.0	0.0	0.0	0.0	0.0	0.0	0.0	0.0	0.0	0.0	0.0
HIST1H4K	8362	gene_synonym	H. sapiens	8362	H. sapiens	H4C12	H4 clustered histone 12	GO:0045653 negative regulation of megakaryocyte differentiation;GO:0006335 DNA replication-dependent nucleosome assembly;GO:0034723 DNA replication-dependent nucleosome organization		Predicted intracellular proteins; Disease related genes					1.0	0.0	0.0	0.0	0.0	0.0	0.0	0.0	0.0	0.0	0.0	0.0	0.0	0.0	0.0	0.0	0.0	0.0	0.0	0.0
HIST1H4L	8368	gene_synonym	H. sapiens	8368	H. sapiens	H4C13	H4 clustered histone 13	GO:0045653 negative regulation of megakaryocyte differentiation;GO:0006335 DNA replication-dependent nucleosome assembly;GO:0034723 DNA replication-dependent nucleosome organization		Predicted intracellular proteins; Disease related genes					1.0	0.0	0.0	0.0	0.0	0.0	0.0	0.0	0.0	0.0	0.0	0.0	0.0	0.0	0.0	0.0	0.0	0.0	0.0	0.0
HIST2H2AB	317772	gene_synonym	H. sapiens	317772	H. sapiens	H2AC21	H2A clustered histone 21	GO:0006342 chromatin silencing;GO:0045814 negative regulation of gene expression, epigenetic;GO:0097549 chromatin organization involved in negative regulation of transcription		Predicted intracellular proteins	Nucleoplasm (Supported)				1.0	1.0	0.0	0.0	0.0	0.0	0.0	0.0	0.0	0.0	0.0	0.0	0.0	0.0	0.0	0.0	0.0	0.0	0.0	0.0
HIST2H2AC	8338	gene_synonym	H. sapiens	8338	H. sapiens	H2AC20	H2A clustered histone 20	GO:0006342 chromatin silencing;GO:0045814 negative regulation of gene expression, epigenetic;GO:0097549 chromatin organization involved in negative regulation of transcription		Predicted intracellular proteins	Nucleoplasm (Approved)				1.0	1.0	0.0	0.0	0.0	0.0	0.0	0.0	0.0	0.0	0.0	0.0	0.0	0.0	0.0	0.0	0.0	0.0	0.0	0.0
HIST2H2BE	8349	gene_synonym	H. sapiens	8349	H. sapiens	H2BC21	H2B clustered histone 21	GO:0002227 innate immune response in mucosa;GO:0002385 mucosal immune response;GO:0002251 organ or tissue specific immune response		Predicted intracellular proteins	Nucleoplasm (Approved); Additional: Cytosol				1.0	1.0	0.0	0.0	0.0	0.0	0.0	0.0	0.0	0.0	0.0	0.0	0.0	0.0	0.0	0.0	0.0	0.0	0.0	0.0
HIST2H2BF	440689	gene_synonym	H. sapiens	440689	H. sapiens	H2BC18	H2B clustered histone 18	GO:0006334 nucleosome assembly;GO:0034728 nucleosome organization;GO:0031497 chromatin assembly		Predicted intracellular proteins	Nucleoplasm (Approved); Additional: Cytosol				1.0	1.0	0.0	0.0	0.0	0.0	0.0	0.0	0.0	0.0	0.0	0.0	0.0	0.0	0.0	0.0	0.0	0.0	0.0	0.0
HIST2H3D	653604	gene_synonym	H. sapiens	653604	H. sapiens	H3C13	H3 clustered histone 13	GO:0006334 nucleosome assembly;GO:0034728 nucleosome organization;GO:0031497 chromatin assembly		Predicted intracellular proteins					1.0	0.0	1.0	0.0	0.0	0.0	0.0	0.0	0.0	0.0	0.0	0.0	0.0	0.0	0.0	0.0	0.0	0.0	0.0	0.0
HIST3H2A	92815	gene_synonym	H. sapiens	92815	H. sapiens	H2AW	H2A.W histone	GO:0070914 UV-damage excision repair;GO:0006337 nucleosome disassembly;GO:0031498 chromatin disassembly		Predicted intracellular proteins	Nucleoplasm (Approved)			(M5939)HALLMARK P53 PATHWAY	1.0	1.0	0.0	0.0	0.0	0.0	0.0	0.0	0.0	0.0	0.0	0.0	0.0	0.0	0.0	0.0	0.0	0.0	0.0	0.0
HIST3H2BB	128312	gene_synonym	H. sapiens	128312	H. sapiens	H2BU1	H2B.U histone 1	GO:0006334 nucleosome assembly;GO:0034728 nucleosome organization;GO:0031497 chromatin assembly		Predicted intracellular proteins	Nucleoplasm (Approved); Additional: Cytosol				1.0	1.0	0.0	0.0	0.0	0.0	0.0	0.0	0.0	0.0	0.0	0.0	0.0	0.0	0.0	0.0	0.0	0.0	0.0	0.0
HIST4H4	121504	gene_synonym	H. sapiens	121504	H. sapiens	H4-16	H4 histone 16	GO:0045653 negative regulation of megakaryocyte differentiation;GO:0006335 DNA replication-dependent nucleosome assembly;GO:0034723 DNA replication-dependent nucleosome organization		Predicted intracellular proteins; Disease related genes	Nucleoplasm (Supported)				1.0	0.0	0.0	0.0	0.0	0.0	0.0	0.0	0.0	0.0	0.0	0.0	0.0	0.0	0.0	0.0	0.0	0.0	0.0	0.0
HMGA2	8091	symbol	H. sapiens	8091	H. sapiens	HMGA2	high mobility group AT-hook 2	GO:0003131 mesodermal-endodermal cell signaling;GO:2000685 positive regulation of cellular response to X-ray;GO:2000683 regulation of cellular response to X-ray		Cancer-related genes:Candidate cancer biomarkers; Predicted intracellular proteins; Disease related genes; Transcription factors:beta-Sheet binding to DNA	Nucleoli;Nucleoli rim;Nucleoplasm (Supported)				1.0	1.0	1.0	1.0	0.0	0.0	0.0	1.0	1.0	1.0	0.0	0.0	0.0	1.0	0.0	0.0	0.0	0.0	0.0	0.0
HMX3	340784	symbol	H. sapiens	340784	H. sapiens	HMX3	H6 family homeobox 3	GO:0050885 neuromuscular process controlling balance;GO:0007566 embryo implantation;GO:0060135 maternal process involved in female pregnancy		Predicted intracellular proteins; Transcription factors:Helix-turn-helix domains	Nucleoplasm (Approved); Additional: Centriolar satellite				0.0	0.0	0.0	1.0	1.0	0.0	0.0	0.0	0.0	1.0	0.0	0.0	0.0	0.0	0.0	0.0	0.0	0.0	0.0	0.0
HS6ST1	9394	symbol	H. sapiens	9394	H. sapiens	HS6ST1	heparan sulfate 6-O-sulfotransferase 1	GO:0015015 heparan sulfate proteoglycan biosynthetic process, enzymatic modification;GO:0015012 heparan sulfate proteoglycan biosynthetic process;GO:0030201 heparan sulfate proteoglycan metabolic process		Predicted intracellular proteins; Disease related genes	Nucleoplasm (Approved)				0.0	0.0	0.0	0.0	0.0	0.0	0.0	0.0	0.0	0.0	0.0	0.0	0.0	0.0	0.0	0.0	0.0	0.0	0.0	0.0
HSPA1B	3304	symbol	H. sapiens	3304	H. sapiens	HSPA1B	heat shock protein family A (Hsp70) member 1B	GO:0070434 positive regulation of nucleotide-binding oligomerization domain containing 2 signaling pathway;GO:0010286 heat acclimation;GO:0070370 cellular heat acclimation		Predicted intracellular proteins	Cytosol;Vesicles (Approved); Additional: Nucleoplasm				1.0	0.0	0.0	0.0	0.0	0.0	0.0	0.0	0.0	0.0	0.0	0.0	0.0	1.0	0.0	0.0	0.0	0.0	0.0	0.0
HTR1D	3352	symbol	H. sapiens	3352	H. sapiens	HTR1D	5-hydroxytryptamine receptor 1D	GO:0014827 intestine smooth muscle contraction;GO:0007198 adenylate cyclase-inhibiting serotonin receptor signaling pathway;GO:0014831 gastro-intestinal system smooth muscle contraction		G-protein coupled receptors:Serotonin receptors; FDA approved drug targets:Small molecule drugs; G-protein coupled receptors:GPCRs excl olfactory receptors		Eletriptan; Ziprasidone; Cabergoline; Zolmitriptan; Dihydroergotamine; Amitriptyline; Clozapine; Loxapine; Lisuride; Sumatriptan; Ergotamine; Apomorphine; Trimipramine; Risperidone; Almotriptan; Naratriptan; Rizatriptan; Frovatriptan; Pergolide; Bromocriptine; Quetiapine; Aripiprazole; Paliperidone; Yohimbine; Lofexidine; NXN-188; Pizotifen; Aripiprazole lauroxil		(M5956)HALLMARK KRAS SIGNALING DN	0.0	0.0	0.0	0.0	0.0	0.0	0.0	0.0	0.0	0.0	0.0	0.0	0.0	0.0	0.0	0.0	0.0	0.0	0.0	0.0
IER5	51278	symbol	H. sapiens	51278	H. sapiens	IER5	immediate early response 5	GO:1900036 positive regulation of cellular response to heat;GO:1900034 regulation of cellular response to heat;GO:0034605 cellular response to heat		Predicted intracellular proteins	Nucleoplasm (Approved); Additional: Nucleoli			(M5890)HALLMARK TNFA SIGNALING VIA NFKB; (M5939)HALLMARK P53 PATHWAY	0.0	0.0	0.0	0.0	0.0	0.0	0.0	0.0	0.0	0.0	0.0	0.0	0.0	0.0	0.0	0.0	0.0	0.0	0.0	0.0
IFT27	11020	symbol	H. sapiens	11020	H. sapiens	IFT27	intraflagellar transport 27	GO:0060122 inner ear receptor cell stereocilium organization;GO:0042073 intraciliary transport;GO:0060119 inner ear receptor cell development		Predicted intracellular proteins; Disease related genes	Mitochondria;Nucleoplasm (Approved)				0.0	0.0	0.0	0.0	0.0	0.0	0.0	0.0	0.0	1.0	0.0	0.0	0.0	0.0	0.0	0.0	0.0	0.0	0.0	0.0
IGF2BP1	10642	symbol	H. sapiens	10642	H. sapiens	IGF2BP1	insulin like growth factor 2 mRNA binding protein 1	GO:0022013 pallium cell proliferation in forebrain;GO:0010610 regulation of mRNA stability involved in response to stress;GO:0070934 CRD-mediated mRNA stabilization		Predicted intracellular proteins	Cytosol (Supported)		(M223)PID BETA CATENIN NUC PATHWAY		0.0	0.0	0.0	0.0	1.0	0.0	0.0	0.0	0.0	0.0	1.0	0.0	0.0	0.0	1.0	0.0	0.0	0.0	0.0	0.0
IL11	3589	symbol	H. sapiens	3589	H. sapiens	IL11	interleukin 11	GO:1903659 regulation of complement-dependent cytotoxicity;GO:0097278 complement-dependent cytotoxicity;GO:2000352 negative regulation of endothelial cell apoptotic process		Cancer-related genes:Candidate cancer biomarkers; Predicted intracellular proteins; Predicted secreted proteins			(M5883)NABA SECRETED FACTORS; (M5885)NABA MATRISOME ASSOCIATED; (M5889)NABA MATRISOME	(M5950)HALLMARK ALLOGRAFT REJECTION	1.0	0.0	1.0	0.0	0.0	0.0	0.0	0.0	0.0	0.0	0.0	0.0	0.0	0.0	0.0	0.0	0.0	0.0	0.0	0.0
INA	9118	symbol	H. sapiens	9118	H. sapiens	INA	internexin neuronal intermediate filament protein alpha	GO:0099185 postsynaptic intermediate filament cytoskeleton organization;GO:0060052 neurofilament cytoskeleton organization;GO:0098974 postsynaptic actin cytoskeleton organization		Predicted intracellular proteins	Intermediate filaments (Approved); Additional: Cytosol				0.0	0.0	0.0	0.0	1.0	0.0	0.0	0.0	0.0	0.0	0.0	0.0	0.0	0.0	0.0	1.0	0.0	0.0	0.0	0.0
IPO5P1	100132815	symbol	H. sapiens	100132815	H. sapiens	IPO5P1	importin 5 pseudogene 1								0.0	0.0	0.0	0.0	0.0	0.0	0.0	0.0	0.0	0.0	0.0	0.0	0.0	0.0	0.0	0.0	0.0	0.0	0.0	0.0
IRF3	3661	symbol	H. sapiens	3661	H. sapiens	IRF3	interferon regulatory factor 3	GO:0035666 TRIF-dependent toll-like receptor signaling pathway;GO:0071888 macrophage apoptotic process;GO:0039530 MDA-5 signaling pathway		Predicted intracellular proteins; Disease related genes; Transcription factors:Helix-turn-helix domains	Cytosol (Supported)				1.0	0.0	1.0	0.0	0.0	0.0	0.0	0.0	0.0	0.0	0.0	0.0	0.0	0.0	0.0	0.0	0.0	0.0	0.0	0.0
IRGQ	126298	symbol	H. sapiens	126298	H. sapiens	IRGQ	immunity related GTPase Q			Predicted intracellular proteins	Vesicles (Approved)				0.0	0.0	0.0	0.0	0.0	0.0	0.0	0.0	0.0	0.0	0.0	0.0	0.0	0.0	0.0	0.0	0.0	0.0	0.0	0.0
IRS1	3667	symbol	H. sapiens	3667	H. sapiens	IRS1	insulin receptor substrate 1	GO:0032000 positive regulation of fatty acid beta-oxidation;GO:0045725 positive regulation of glycogen biosynthetic process;GO:0046321 positive regulation of fatty acid oxidation		Predicted intracellular proteins; Disease related genes	Cytosol;Nucleoplasm (Supported); Additional: Plasma membrane	[4-({5-(AMINOCARBONYL)-4-[(3-METHYLPHENYL)AMINO]PYRIMIDIN-2-YL}AMINO)PHENYL]ACETIC ACID	(M268)PID S1P S1P2 PATHWAY; (M1718)SIG IL4RECEPTOR IN B LYPHOCYTES; (M125)PID IGF1 PATHWAY	(M5942)HALLMARK UV RESPONSE DN; (M5915)HALLMARK APICAL JUNCTION	0.0	0.0	1.0	0.0	0.0	0.0	0.0	0.0	0.0	0.0	0.0	0.0	0.0	0.0	0.0	0.0	0.0	0.0	0.0	0.0
ISG15	9636	symbol	H. sapiens	9636	H. sapiens	ISG15	ISG15 ubiquitin like modifier	GO:0032459 regulation of protein oligomerization;GO:0032461 positive regulation of protein oligomerization;GO:0032020 ISG15-protein conjugation		Predicted intracellular proteins; Predicted secreted proteins; Disease related genes				(M5911)HALLMARK INTERFERON ALPHA RESPONSE; (M5913)HALLMARK INTERFERON GAMMA RESPONSE	1.0	0.0	1.0	0.0	0.0	0.0	0.0	0.0	0.0	0.0	0.0	0.0	0.0	0.0	0.0	0.0	1.0	0.0	0.0	1.0
ITGA3	3675	symbol	H. sapiens	3675	H. sapiens	ITGA3	integrin subunit alpha 3	GO:0097062 dendritic spine maintenance;GO:0035024 negative regulation of Rho protein signal transduction;GO:0035640 exploration behavior		Cancer-related genes:Candidate cancer biomarkers; Predicted intracellular proteins; Disease related genes; CD markers	Plasma membrane (Supported)		(M47)PID INTEGRIN CS PATHWAY; (M69)PID REELIN PATHWAY; (M196)PID IL23 PATHWAY	(M5915)HALLMARK APICAL JUNCTION	0.0	0.0	1.0	1.0	0.0	0.0	1.0	0.0	1.0	0.0	1.0	1.0	1.0	0.0	0.0	0.0	0.0	0.0	0.0	1.0
JAG2	3714	symbol	H. sapiens	3714	H. sapiens	JAG2	jagged canonical Notch ligand 2	GO:1990134 epithelial cell apoptotic process involved in palatal shelf morphogenesis;GO:0009912 auditory receptor cell fate commitment;GO:0060120 inner ear receptor cell fate commitment			Vesicles (Supported); Additional: Cytosol		(M17)PID NOTCH PATHWAY; (M19)PID P73PATHWAY	(M5944)HALLMARK ANGIOGENESIS; (M5895)HALLMARK WNT BETA CATENIN SIGNALING; (M5939)HALLMARK P53 PATHWAY	1.0	0.0	0.0	1.0	0.0	0.0	1.0	0.0	0.0	1.0	0.0	1.0	0.0	0.0	0.0	0.0	0.0	0.0	1.0	0.0
JUP	3728	symbol	H. sapiens	3728	H. sapiens	JUP	junction plakoglobin	GO:0071603 endothelial cell-cell adhesion;GO:0002159 desmosome assembly;GO:0071680 response to indole-3-methanol		Cancer-related genes:Candidate cancer biomarkers; Predicted intracellular proteins; Disease related genes	Cell Junctions;Plasma membrane (Supported); Additional: Vesicles	Zinc; Zinc acetate	(M184)PID ECADHERIN KERATINOCYTE PATHWAY; (M266)PID NCADHERIN PATHWAY; (M156)PID ECADHERIN NASCENT AJ PATHWAY	(M5915)HALLMARK APICAL JUNCTION; (M5934)HALLMARK XENOBIOTIC METABOLISM; (M5953)HALLMARK KRAS SIGNALING UP	1.0	0.0	1.0	0.0	0.0	0.0	1.0	0.0	0.0	0.0	0.0	1.0	1.0	0.0	0.0	0.0	0.0	0.0	0.0	0.0
KCNG2	26251	symbol	H. sapiens	26251	H. sapiens	KCNG2	potassium voltage-gated channel modifier subfamily G member 2	GO:0051260 protein homooligomerization;GO:0008016 regulation of heart contraction;GO:0071805 potassium ion transmembrane transport		Voltage-gated ion channels:Voltage-Gated Potassium Channels					0.0	0.0	0.0	0.0	0.0	0.0	0.0	0.0	0.0	0.0	0.0	0.0	0.0	0.0	0.0	0.0	0.0	0.0	0.0	0.0
KCNK3	3777	symbol	H. sapiens	3777	H. sapiens	KCNK3	potassium two pore domain channel subfamily K member 3	GO:0051481 negative regulation of cytosolic calcium ion concentration;GO:0030322 stabilization of membrane potential;GO:0071294 cellular response to zinc ion		Transporters:Transporter channels and pores; FDA approved drug targets:Small molecule drugs; Voltage-gated ion channels:Two-P Potassium Channels; Disease related genes		Doxapram; Halothane			0.0	0.0	0.0	0.0	1.0	0.0	0.0	0.0	0.0	1.0	0.0	0.0	0.0	0.0	0.0	0.0	0.0	0.0	0.0	0.0
KCNN2	3781	symbol	H. sapiens	3781	H. sapiens	KCNN2	potassium calcium-activated channel subfamily N member 2	GO:0098914 membrane repolarization during atrial cardiac muscle cell action potential;GO:0099624 atrial cardiac muscle cell membrane repolarization;GO:0086014 atrial cardiac muscle cell action potential		Transporters:Transporter channels and pores; Voltage-gated ion channels:Calcium-Activated Potassium Channels; FDA approved drug targets:Small molecule drugs	Nucleoplasm;Plasma membrane (Uncertain)				0.0	0.0	0.0	0.0	0.0	0.0	0.0	0.0	0.0	0.0	0.0	0.0	0.0	0.0	0.0	0.0	0.0	0.0	0.0	0.0
KDM5C	8242	symbol	H. sapiens	8242	H. sapiens	KDM5C	lysine demethylase 5C	GO:0034721 histone H3-K4 demethylation, trimethyl-H3-K4-specific;GO:0034720 histone H3-K4 demethylation;GO:0070076 histone lysine demethylation		Transcription factors:Helix-turn-helix domains; Cancer-related genes:Mutated cancer genes; Predicted intracellular proteins; Disease related genes; Cancer-related genes:Mutational cancer driver genes	Nucleoplasm (Enhanced); Additional: Cytosol				1.0	0.0	0.0	0.0	0.0	0.0	0.0	0.0	0.0	0.0	0.0	0.0	0.0	0.0	0.0	0.0	0.0	0.0	0.0	0.0
KHDRBS3	10656	symbol	H. sapiens	10656	H. sapiens	KHDRBS3	KH RNA binding domain containing, signal transduction associated 3	GO:0000381 regulation of alternative mRNA splicing, via spliceosome;GO:0000380 alternative mRNA splicing, via spliceosome;GO:0048024 regulation of mRNA splicing, via spliceosome		Predicted intracellular proteins	Nucleoplasm (Supported)				0.0	0.0	0.0	0.0	0.0	0.0	0.0	0.0	0.0	0.0	0.0	0.0	0.0	0.0	0.0	0.0	0.0	0.0	0.0	0.0
KIAA1217	56243	symbol	H. sapiens	56243	H. sapiens	KIAA1217	KIAA1217	GO:0048706 embryonic skeletal system development;GO:0001501 skeletal system development;GO:0043009 chordate embryonic development		Predicted intracellular proteins	Cytosol;Nucleoplasm (Approved)				0.0	0.0	0.0	1.0	0.0	0.0	0.0	0.0	0.0	0.0	0.0	0.0	0.0	0.0	0.0	0.0	0.0	0.0	0.0	0.0
KIF13B	23303	symbol	H. sapiens	23303	H. sapiens	KIF13B	kinesin family member 13B	GO:0050770 regulation of axonogenesis;GO:0006605 protein targeting;GO:0007018 microtubule-based movement		Predicted intracellular proteins			(M86)PID ARF6 PATHWAY	(M5939)HALLMARK P53 PATHWAY	0.0	0.0	1.0	0.0	0.0	0.0	0.0	0.0	0.0	0.0	1.0	0.0	0.0	0.0	0.0	0.0	0.0	0.0	0.0	0.0
KISS1	3814	symbol	H. sapiens	3814	H. sapiens	KISS1	KiSS-1 metastasis suppressor	GO:0060112 generation of ovulation cycle rhythm;GO:0033686 positive regulation of luteinizing hormone secretion;GO:0033684 regulation of luteinizing hormone secretion		Cancer-related genes:Candidate cancer biomarkers; Predicted secreted proteins; Disease related genes	Vesicles (Approved)				0.0	0.0	0.0	0.0	0.0	0.0	0.0	0.0	0.0	0.0	0.0	0.0	0.0	0.0	0.0	0.0	0.0	0.0	0.0	0.0
KLHL11	55175	symbol	H. sapiens	55175	H. sapiens	KLHL11	kelch like family member 11			Predicted intracellular proteins	Nucleoplasm (Approved); Additional: Nuclear membrane				0.0	0.0	0.0	0.0	0.0	0.0	0.0	0.0	0.0	0.0	0.0	0.0	0.0	0.0	0.0	0.0	0.0	0.0	0.0	0.0
KPNA6	23633	symbol	H. sapiens	23633	H. sapiens	KPNA6	karyopherin subunit alpha 6	GO:0075506 entry of viral genome into host nucleus through nuclear pore complex via importin;GO:0075732 viral penetration into host nucleus;GO:0075733 intracellular transport of virus		Transporters:Transporter channels and pores; Predicted intracellular proteins	Cytosol (Approved); Additional: Nucleoplasm				0.0	0.0	0.0	0.0	0.0	0.0	0.0	0.0	0.0	0.0	0.0	0.0	0.0	0.0	0.0	0.0	0.0	0.0	0.0	0.0
KRT19	3880	symbol	H. sapiens	3880	H. sapiens	KRT19	keratin 19	GO:0060706 cell differentiation involved in embryonic placenta development;GO:0045214 sarcomere organization;GO:0030239 myofibril assembly		Cancer-related genes:Candidate cancer biomarkers; Predicted intracellular proteins	Intermediate filaments (Supported)		(M229)PID P38 ALPHA BETA DOWNSTREAM PATHWAY	(M5908)HALLMARK ANDROGEN RESPONSE; (M5906)HALLMARK ESTROGEN RESPONSE EARLY; (M5907)HALLMARK ESTROGEN RESPONSE LATE	0.0	0.0	0.0	1.0	0.0	0.0	0.0	0.0	0.0	0.0	1.0	0.0	0.0	0.0	0.0	0.0	0.0	0.0	0.0	0.0
LAGE3	8270	symbol	H. sapiens	8270	H. sapiens	LAGE3	L antigen family member 3	GO:0070525 tRNA threonylcarbamoyladenosine metabolic process;GO:0008033 tRNA processing;GO:0006399 tRNA metabolic process		Predicted intracellular proteins; Disease related genes	Nucleoplasm (Supported); Additional: Nuclear bodies				0.0	0.0	0.0	0.0	0.0	0.0	0.0	0.0	0.0	0.0	0.0	0.0	0.0	0.0	0.0	0.0	0.0	0.0	0.0	0.0
LETM2	137994	symbol	H. sapiens	137994	H. sapiens	LETM2	leucine zipper and EF-hand containing transmembrane protein 2	GO:0006875 cellular metal ion homeostasis;GO:0030003 cellular cation homeostasis;GO:0055065 metal ion homeostasis		Predicted intracellular proteins	Nucleoplasm (Approved); Additional: Cytosol;Nuclear bodies				0.0	0.0	0.0	0.0	0.0	0.0	0.0	0.0	0.0	0.0	0.0	0.0	0.0	0.0	0.0	0.0	0.0	0.0	0.0	0.0
LGR5	8549	symbol	H. sapiens	8549	H. sapiens	LGR5	leucine rich repeat containing G protein-coupled receptor 5	GO:2001013 epithelial cell proliferation involved in renal tubule morphogenesis;GO:0007190 activation of adenylate cyclase activity;GO:0009994 oocyte differentiation		G-protein coupled receptors:GPCRs excl olfactory receptors	Golgi apparatus (Approved); Additional: Nucleoplasm				1.0	0.0	0.0	1.0	0.0	0.0	1.0	0.0	0.0	1.0	0.0	1.0	0.0	0.0	0.0	0.0	1.0	0.0	0.0	0.0
LHX2	9355	symbol	H. sapiens	9355	H. sapiens	LHX2	LIM homeobox 2	GO:0035090 maintenance of apical/basal cell polarity;GO:0045199 maintenance of epithelial cell apical/basal polarity;GO:0021978 telencephalon regionalization		Predicted intracellular proteins; Transcription factors:Helix-turn-helix domains	Nucleoplasm (Approved)			(M5941)HALLMARK UV RESPONSE UP	1.0	1.0	0.0	1.0	1.0	0.0	0.0	0.0	0.0	1.0	1.0	1.0	0.0	1.0	1.0	0.0	0.0	0.0	1.0	0.0
LIF	3976	symbol	H. sapiens	3976	H. sapiens	LIF	LIF interleukin 6 family cytokine	GO:1901676 positive regulation of histone H3-K27 acetylation;GO:0043974 histone H3-K27 acetylation;GO:1901674 regulation of histone H3-K27 acetylation		Cancer-related genes:Candidate cancer biomarkers; Predicted intracellular proteins; Predicted secreted proteins	Cytosol (Supported)		(M65)PID FRA PATHWAY; (M145)PID P53 DOWNSTREAM PATHWAY; (M5883)NABA SECRETED FACTORS	(M5947)HALLMARK IL2 STAT5 SIGNALING; (M5890)HALLMARK TNFA SIGNALING VIA NFKB; (M5932)HALLMARK INFLAMMATORY RESPONSE	1.0	0.0	1.0	1.0	0.0	0.0	1.0	0.0	0.0	0.0	0.0	1.0	1.0	0.0	0.0	0.0	0.0	0.0	0.0	0.0
LIMD1	8994	symbol	H. sapiens	8994	H. sapiens	LIMD1	LIM domain containing 1	GO:0035331 negative regulation of hippo signaling;GO:0002076 osteoblast development;GO:0035330 regulation of hippo signaling		Predicted intracellular proteins	Focal adhesion sites;Nucleoplasm (Supported)				1.0	1.0	1.0	0.0	0.0	0.0	1.0	0.0	0.0	0.0	0.0	0.0	0.0	0.0	0.0	0.0	1.0	0.0	0.0	0.0
LINC00273	649159	symbol	H. sapiens	649159	H. sapiens	LINC00273	long intergenic non-protein coding RNA 273								0.0	0.0	0.0	0.0	0.0	0.0	0.0	0.0	0.0	0.0	0.0	0.0	0.0	0.0	0.0	0.0	0.0	0.0	0.0	0.0
LINC01521	54944	symbol	H. sapiens	54944	H. sapiens	LINC01521	long intergenic non-protein coding RNA 1521								0.0	0.0	0.0	0.0	0.0	0.0	0.0	0.0	0.0	0.0	0.0	0.0	0.0	0.0	0.0	0.0	0.0	0.0	0.0	0.0
LOC100129940	100129940	Gene_ID	H. sapiens	100129940	H. sapiens	HMGA2-AS1	HMGA2 antisense RNA 1								0.0	0.0	0.0	0.0	0.0	0.0	0.0	0.0	0.0	0.0	0.0	0.0	0.0	0.0	0.0	0.0	0.0	0.0	0.0	0.0
LOC100133091	100133091	Gene_ID	H. sapiens	100133091	H. sapiens	LOC100133091	uncharacterized LOC100133091								0.0	0.0	0.0	0.0	0.0	0.0	0.0	0.0	0.0	0.0	0.0	0.0	0.0	0.0	0.0	0.0	0.0	0.0	0.0	0.0
LOC100499194	100499194	Gene_ID	H. sapiens	100499194	H. sapiens	LOC100499194	uncharacterized LOC100499194								0.0	0.0	0.0	0.0	0.0	0.0	0.0	0.0	0.0	0.0	0.0	0.0	0.0	0.0	0.0	0.0	0.0	0.0	0.0	0.0
LOC100507156	100507156	Gene_ID	H. sapiens	100507156	H. sapiens	LOC100507156	uncharacterized LOC100507156								0.0	0.0	0.0	0.0	0.0	0.0	0.0	0.0	0.0	0.0	0.0	0.0	0.0	0.0	0.0	0.0	0.0	0.0	0.0	0.0
LOC102723854	102723854	Gene_ID	H. sapiens	102723854	H. sapiens	LINC01819	long intergenic non-protein coding RNA 1819								0.0	0.0	0.0	0.0	0.0	0.0	0.0	0.0	0.0	0.0	0.0	0.0	0.0	0.0	0.0	0.0	0.0	0.0	0.0	0.0
LOC221946	221946	Gene_ID	H. sapiens	221946	H. sapiens	LOC221946	uncharacterized LOC221946								0.0	0.0	0.0	0.0	0.0	0.0	0.0	0.0	0.0	0.0	0.0	0.0	0.0	0.0	0.0	0.0	0.0	0.0	0.0	0.0
LOC389199	389199	Gene_ID	H. sapiens	389199	H. sapiens	LOC389199	uncharacterized LOC389199								0.0	0.0	0.0	0.0	0.0	0.0	0.0	0.0	0.0	0.0	0.0	0.0	0.0	0.0	0.0	0.0	0.0	0.0	0.0	0.0
LOC389906	389906	Gene_ID	H. sapiens	389906	H. sapiens	LOC389906	zinc finger protein 839 pseudogene								0.0	0.0	0.0	0.0	0.0	0.0	0.0	0.0	0.0	0.0	0.0	0.0	0.0	0.0	0.0	0.0	0.0	0.0	0.0	0.0
LOC439994	439994	Gene_ID	H. sapiens	439994	H. sapiens	LINC00863	long intergenic non-protein coding RNA 863								0.0	0.0	0.0	0.0	0.0	0.0	0.0	0.0	0.0	0.0	0.0	0.0	0.0	0.0	0.0	0.0	0.0	0.0	0.0	0.0
LOC553103	553103	Gene_ID	H. sapiens	553103	H. sapiens	MIR3936HG	MIR3936 host gene								0.0	0.0	0.0	0.0	0.0	0.0	0.0	0.0	0.0	0.0	0.0	0.0	0.0	0.0	0.0	0.0	0.0	0.0	0.0	0.0
LOC644285	644285	Gene_ID	H. sapiens	644285	H. sapiens	LOC644285	uncharacterized LOC644285								0.0	0.0	0.0	0.0	0.0	0.0	0.0	0.0	0.0	0.0	0.0	0.0	0.0	0.0	0.0	0.0	0.0	0.0	0.0	0.0
LOC728392	728392	Gene_ID	H. sapiens	728392	H. sapiens	LOC728392	uncharacterized LOC728392								0.0	0.0	0.0	0.0	0.0	0.0	0.0	0.0	0.0	0.0	0.0	0.0	0.0	0.0	0.0	0.0	0.0	0.0	0.0	0.0
LONRF2	164832	symbol	H. sapiens	164832	H. sapiens	LONRF2	LON peptidase N-terminal domain and ring finger 2			Predicted intracellular proteins	Nucleoplasm (Approved)				0.0	0.0	0.0	0.0	0.0	0.0	0.0	0.0	0.0	0.0	0.0	0.0	0.0	0.0	0.0	0.0	0.0	0.0	0.0	0.0
LRRC75A	388341	symbol	H. sapiens	388341	H. sapiens	LRRC75A	leucine rich repeat containing 75A			Predicted intracellular proteins	Nucleoplasm (Approved); Additional: Cytosol;Nucleoli				0.0	0.0	0.0	0.0	0.0	0.0	0.0	0.0	0.0	0.0	0.0	0.0	0.0	0.0	0.0	0.0	0.0	0.0	0.0	0.0
LRRTM2	26045	symbol	H. sapiens	26045	H. sapiens	LRRTM2	leucine rich repeat transmembrane neuronal 2	GO:0099151 regulation of postsynaptic density assembly;GO:0099150 regulation of postsynaptic specialization assembly;GO:0002091 negative regulation of receptor internalization		Predicted intracellular proteins					0.0	0.0	0.0	0.0	0.0	0.0	0.0	0.0	0.0	0.0	0.0	0.0	0.0	0.0	0.0	0.0	0.0	0.0	0.0	0.0
LSM12	124801	symbol	H. sapiens	124801	H. sapiens	LSM12	LSM12 homolog			Predicted intracellular proteins	Cytosol (Approved)				0.0	0.0	0.0	0.0	0.0	0.0	0.0	0.0	0.0	0.0	0.0	0.0	0.0	0.0	0.0	0.0	0.0	0.0	0.0	0.0
LZTS1	11178	symbol	H. sapiens	11178	H. sapiens	LZTS1	leucine zipper tumor suppressor 1	GO:0016242 negative regulation of macroautophagy;GO:0048814 regulation of dendrite morphogenesis;GO:0010507 negative regulation of autophagy		Predicted intracellular proteins; Disease related genes	Plasma membrane (Approved); Additional: Nucleoli				0.0	0.0	0.0	0.0	0.0	0.0	0.0	0.0	0.0	0.0	1.0	0.0	0.0	0.0	0.0	0.0	0.0	0.0	0.0	0.0
MAB21L2	10586	symbol	H. sapiens	10586	H. sapiens	MAB21L2	mab-21 like 2	GO:0010172 embryonic body morphogenesis;GO:0010171 body morphogenesis;GO:0043010 camera-type eye development		Predicted intracellular proteins; Disease related genes	Nucleoplasm (Enhanced)				0.0	0.0	0.0	1.0	0.0	0.0	0.0	0.0	0.0	1.0	0.0	0.0	0.0	0.0	0.0	0.0	0.0	0.0	0.0	0.0
MALAT1	378938	symbol	H. sapiens	378938	H. sapiens	MALAT1	metastasis associated lung adenocarcinoma transcript 1	GO:0110024 positive regulation of cardiac muscle myoblast proliferation;GO:0110021 cardiac muscle myoblast proliferation;GO:0110022 regulation of cardiac muscle myoblast proliferation							0.0	0.0	0.0	0.0	0.0	0.0	0.0	0.0	0.0	0.0	0.0	0.0	0.0	0.0	0.0	0.0	0.0	0.0	0.0	0.0
MANEAL	149175	symbol	H. sapiens	149175	H. sapiens	MANEAL	mannosidase endo-alpha like			Predicted intracellular proteins	Golgi apparatus (Approved)				0.0	0.0	0.0	0.0	0.0	0.0	0.0	0.0	0.0	0.0	0.0	0.0	0.0	0.0	0.0	0.0	0.0	0.0	0.0	0.0
MAP2	4133	symbol	H. sapiens	4133	H. sapiens	MAP2	microtubule associated protein 2	GO:1901951 regulation of anterograde dense core granule transport;GO:1901953 positive regulation of anterograde dense core granule transport;GO:1904809 regulation of dense core granule transport		Predicted intracellular proteins; FDA approved drug targets:Small molecule drugs	Cytosol;Plasma membrane (Approved)	Estramustine; Paclitaxel; Docetaxel	(M87)PID LKB1 PATHWAY		1.0	0.0	0.0	0.0	0.0	0.0	0.0	0.0	0.0	0.0	1.0	0.0	1.0	1.0	0.0	0.0	0.0	0.0	0.0	0.0
MAP3K5	4217	symbol	H. sapiens	4217	H. sapiens	MAP3K5	mitogen-activated protein kinase kinase kinase 5	GO:0010663 positive regulation of striated muscle cell apoptotic process;GO:0010666 positive regulation of cardiac muscle cell apoptotic process;GO:1900745 positive regulation of p38MAPK cascade	STE Ser/Thr protein kinase family	ENZYME proteins:Transferases; Predicted intracellular proteins; Kinases:STE Ser/Thr protein kinases; Enzymes	Cytosol (Supported)		(M20)PID P38 MKK3 6PATHWAY; (M197)PID HIV NEF PATHWAY; (M249)PID PI3KCI AKT PATHWAY		1.0	0.0	0.0	0.0	0.0	0.0	0.0	0.0	0.0	0.0	0.0	0.0	0.0	0.0	0.0	1.0	0.0	1.0	0.0	0.0
MAP3K9	4293	symbol	H. sapiens	4293	H. sapiens	MAP3K9	mitogen-activated protein kinase kinase kinase 9	GO:0046777 protein autophosphorylation;GO:0043065 positive regulation of apoptotic process;GO:0043068 positive regulation of programmed cell death	STE Ser/Thr protein kinase family	ENZYME proteins:Transferases; Predicted intracellular proteins; Enzymes; Disease related genes; Kinases:STE Ser/Thr protein kinases; Potential drug targets	Nucleoli;Nucleoplasm (Approved)	12-(2-hydroxyethyl)-2-(1-methylethoxy)-13,14-dihydronaphtho[2,1-a]pyrrolo[3,4-c]carbazol-5(12H)-one; Fostamatinib	(M3721)ST JNK MAPK PATHWAY		0.0	0.0	0.0	0.0	0.0	0.0	0.0	0.0	0.0	0.0	0.0	0.0	0.0	0.0	0.0	0.0	0.0	0.0	0.0	0.0
MAPK11	5600	symbol	H. sapiens	5600	H. sapiens	MAPK11	mitogen-activated protein kinase 11	GO:0060044 negative regulation of cardiac muscle cell proliferation;GO:0055022 negative regulation of cardiac muscle tissue growth;GO:0061117 negative regulation of heart growth	CMGC Ser/Thr protein kinase family	ENZYME proteins:Transferases; Predicted intracellular proteins; FDA approved drug targets:Small molecule drugs; Kinases:CMGC Ser/Thr protein kinases; Enzymes	Mitochondria (Approved)	KC706; Regorafenib	(M199)PID P38 MK2 PATHWAY; (M274)PID LYMPH ANGIOGENESIS PATHWAY; (M20)PID P38 MKK3 6PATHWAY	(M5915)HALLMARK APICAL JUNCTION	1.0	0.0	1.0	1.0	0.0	0.0	1.0	0.0	0.0	0.0	0.0	0.0	0.0	1.0	0.0	1.0	1.0	0.0	0.0	0.0
MBP	4155	symbol	H. sapiens	4155	H. sapiens	MBP	myelin basic protein	GO:1904685 positive regulation of metalloendopeptidase activity;GO:0034115 negative regulation of heterotypic cell-cell adhesion;GO:0070587 regulation of cell-cell adhesion involved in gastrulation		Candidate cardiovascular disease genes; Disease related genes; Predicted intracellular proteins	Plasma membrane (Approved)			(M5938)HALLMARK REACTIVE OXYGEN SPECIES PATHWAY	0.0	0.0	0.0	1.0	1.0	0.0	0.0	0.0	0.0	0.0	0.0	0.0	0.0	0.0	0.0	0.0	0.0	0.0	1.0	0.0
MDM2	4193	symbol	H. sapiens	4193	H. sapiens	MDM2	MDM2 proto-oncogene	GO:0071301 cellular response to vitamin B1;GO:1904404 response to formaldehyde;GO:0010266 response to vitamin B1		Cancer-related genes:Candidate cancer biomarkers; ENZYME proteins:Transferases; Predicted intracellular proteins; Enzymes; Disease related genes; Potential drug targets	Nucleoplasm (Supported)	Zinc; Cis-[4,5-Bis-(4-Bromophenyl)-2-(2-Ethoxy-4-Methoxyphenyl)-4,5-Dihydroimidazol-1-Yl]-[4-(2-Hydroxyethyl)Piperazin-1-Yl]Methanone; Cis-[4,5-Bis-(4-Chlorophenyl)-2-(2-Isopropoxy-4-Methoxyphenyl)-4,5-Dihyd Roimidazol-1-Yl]-Piperazin-1-Yl-Methanone; Zinc acetate; Zinc chloride; Zinc sulfate, unspecified form	(M140)PID RANBP2 PATHWAY; (M1529)SA G1 AND S PHASES; (M242)PID AURORA A PATHWAY	(M5939)HALLMARK P53 PATHWAY	1.0	1.0	1.0	1.0	0.0	0.0	1.0	0.0	1.0	0.0	1.0	0.0	1.0	0.0	0.0	0.0	0.0	0.0	0.0	1.0
METTL24	728464	symbol	H. sapiens	728464	H. sapiens	METTL24	methyltransferase like 24	GO:0032259 methylation;GO:0008152 metabolic process;GO:0008150 biological_process		Predicted secreted proteins					0.0	0.0	0.0	0.0	0.0	0.0	0.0	0.0	0.0	0.0	0.0	0.0	0.0	0.0	0.0	0.0	0.0	0.0	0.0	0.0
MFHAS1	9258	symbol	H. sapiens	9258	H. sapiens	MFHAS1	multifunctional ROCO family signaling regulator 1	GO:0034137 positive regulation of toll-like receptor 2 signaling pathway;GO:0034136 negative regulation of toll-like receptor 2 signaling pathway;GO:0034135 regulation of toll-like receptor 2 signaling pathway		Predicted intracellular proteins; Disease related genes	Nucleoplasm (Approved); Additional: Cytosol			(M5945)HALLMARK HEME METABOLISM	1.0	0.0	0.0	0.0	0.0	0.0	0.0	0.0	0.0	0.0	0.0	0.0	1.0	0.0	0.0	0.0	0.0	0.0	0.0	0.0
MGAT5	4249	symbol	H. sapiens	4249	H. sapiens	MGAT5	alpha-1,6-mannosylglycoprotein 6-beta-N-acetylglucosaminyltransferase	GO:1903614 negative regulation of protein tyrosine phosphatase activity;GO:1903613 regulation of protein tyrosine phosphatase activity;GO:0018279 protein N-linked glycosylation via asparagine		ENZYME proteins:Transferases; Enzymes					0.0	0.0	0.0	0.0	0.0	0.0	0.0	0.0	0.0	0.0	0.0	0.0	0.0	0.0	0.0	0.0	0.0	0.0	0.0	0.0
MGC27345						None	None	None	None	None	None	None	None	None	nan	nan	nan	nan	nan	nan	nan	nan	nan	nan	nan	nan	nan	nan	nan	nan	nan	nan	nan	nan
MICU3	286097	symbol	H. sapiens	286097	H. sapiens	MICU3	mitochondrial calcium uptake family member 3	GO:0036444 calcium import into the mitochondrion;GO:0006851 mitochondrial calcium ion transmembrane transport;GO:0051560 mitochondrial calcium ion homeostasis		Predicted intracellular proteins					0.0	0.0	0.0	0.0	0.0	0.0	0.0	0.0	0.0	0.0	0.0	0.0	0.0	0.0	0.0	0.0	0.0	0.0	0.0	0.0
MIR320A	407037	symbol	H. sapiens	407037	H. sapiens	MIR320A	microRNA 320a	GO:0032713 negative regulation of interleukin-4 production;GO:0010663 positive regulation of striated muscle cell apoptotic process;GO:0010666 positive regulation of cardiac muscle cell apoptotic process							0.0	1.0	0.0	0.0	0.0	0.0	1.0	0.0	0.0	1.0	0.0	0.0	0.0	0.0	0.0	0.0	0.0	0.0	0.0	0.0
MIR4466	100616154	symbol	H. sapiens	100616154	H. sapiens	MIR4466	microRNA 4466								0.0	0.0	0.0	0.0	0.0	0.0	0.0	0.0	0.0	0.0	0.0	0.0	0.0	0.0	0.0	0.0	0.0	0.0	0.0	0.0
MIR4532						None	None	None	None	None	None	None	None	None	nan	nan	nan	nan	nan	nan	nan	nan	nan	nan	nan	nan	nan	nan	nan	nan	nan	nan	nan	nan
MIR6087						None	None	None	None	None	None	None	None	None	nan	nan	nan	nan	nan	nan	nan	nan	nan	nan	nan	nan	nan	nan	nan	nan	nan	nan	nan	nan
MIR663AHG	284801	symbol	H. sapiens	284801	H. sapiens	MIR663AHG	MIR663A host gene								0.0	0.0	0.0	0.0	0.0	0.0	0.0	0.0	0.0	0.0	0.0	0.0	0.0	0.0	0.0	0.0	0.0	0.0	0.0	0.0
MITF	4286	symbol	H. sapiens	4286	H. sapiens	MITF	melanocyte inducing transcription factor	GO:0044336 canonical Wnt signaling pathway involved in negative regulation of apoptotic process;GO:0030318 melanocyte differentiation;GO:0050931 pigment cell differentiation		Predicted intracellular proteins; Disease related genes; Transcription factors:Basic domains; Cancer-related genes			(M229)PID P38 ALPHA BETA DOWNSTREAM PATHWAY; (M183)PID IL6 7 PATHWAY; (M231)PID KIT PATHWAY		1.0	0.0	1.0	0.0	0.0	0.0	1.0	0.0	0.0	1.0	0.0	0.0	0.0	0.0	0.0	0.0	0.0	0.0	1.0	0.0
MLLT11	10962	symbol	H. sapiens	10962	H. sapiens	MLLT11	MLLT11 transcription factor 7 cofactor	GO:0051901 positive regulation of mitochondrial depolarization;GO:1904181 positive regulation of membrane depolarization;GO:0051900 regulation of mitochondrial depolarization		Cancer-related genes:Candidate cancer biomarkers; Predicted intracellular proteins; Disease related genes	Cytosol;Nucleoplasm (Supported)			(M5924)HALLMARK MTORC1 SIGNALING	0.0	0.0	0.0	0.0	0.0	0.0	0.0	0.0	0.0	0.0	0.0	0.0	0.0	0.0	0.0	0.0	0.0	0.0	0.0	0.0
MMP13	4322	symbol	H. sapiens	4322	H. sapiens	MMP13	matrix metallopeptidase 13	GO:0003417 growth plate cartilage development;GO:0003416 endochondral bone growth;GO:0001958 endochondral ossification		Cancer-related genes:Candidate cancer biomarkers; Predicted secreted proteins; FDA approved drug targets:Small molecule drugs; Enzymes; Disease related genes; Peptidases:Metallopeptidases		Marimastat; 3-Methylpyridine; 2-{4-[4-(4-Chloro-Phenoxy)-Benzenesulfonyl]-Tetrahydro-Pyran-4-Yl}-N-Hydroxy-Acetamide; WAY-151693; Hydroxyaminovaline; 4-methoxybenzenesulfinate; PYRIMIDINE-4,6-DICARBOXYLIC ACID BIS-(3-METHYL-BENZYLAMIDE); PYRIMIDINE-4,6-DICARBOXYLIC ACID BIS-(4-FLUORO-3-METHYL-BENZYLAMIDE); PYRIMIDINE-4,6-DICARBOXYLIC ACID BIS-[(PYRIDIN-3-YLMETHYL)-AMIDE]; Endostatin; TERT-BUTYL 4…	(M174)PID UPA UPAR PATHWAY; (M3468)NABA ECM REGULATORS; (M5885)NABA MATRISOME ASSOCIATED	(M5921)HALLMARK COMPLEMENT	0.0	0.0	0.0	1.0	0.0	0.0	0.0	0.0	0.0	0.0	0.0	0.0	0.0	1.0	0.0	0.0	1.0	0.0	0.0	0.0
MOB4	25843	symbol	H. sapiens	25843	H. sapiens	MOB4	MOB family member 4, phocein			Predicted intracellular proteins					0.0	0.0	0.0	0.0	0.0	0.0	0.0	0.0	0.0	0.0	0.0	0.0	0.0	0.0	0.0	0.0	0.0	0.0	0.0	0.0
MPZL3	196264	symbol	H. sapiens	196264	H. sapiens	MPZL3	myelin protein zero like 3	GO:0042303 molting cycle;GO:0042633 hair cycle;GO:0030198 extracellular matrix organization		Predicted intracellular proteins	Golgi apparatus (Approved)				0.0	0.0	0.0	0.0	0.0	0.0	0.0	0.0	0.0	0.0	0.0	0.0	0.0	0.0	0.0	0.0	0.0	0.0	0.0	0.0
MRPS24	64951	symbol	H. sapiens	64951	H. sapiens	MRPS24	mitochondrial ribosomal protein S24	GO:0032543 mitochondrial translation;GO:0140053 mitochondrial gene expression;GO:0006412 translation		Predicted intracellular proteins; Ribosomal proteins					0.0	0.0	0.0	0.0	0.0	0.0	0.0	0.0	0.0	0.0	0.0	0.0	0.0	0.0	0.0	0.0	0.0	0.0	0.0	0.0
MSX2	4488	symbol	H. sapiens	4488	H. sapiens	MSX2	msh homeobox 2	GO:0060363 cranial suture morphogenesis;GO:0097094 craniofacial suture morphogenesis;GO:2000678 negative regulation of transcription regulatory region DNA binding		Predicted intracellular proteins; Disease related genes; Transcription factors:Helix-turn-helix domains	Nuclear speckles (Supported)				0.0	0.0	0.0	1.0	0.0	0.0	0.0	0.0	0.0	0.0	0.0	0.0	0.0	0.0	0.0	0.0	1.0	0.0	1.0	0.0
MTCL1	23255	symbol	H. sapiens	23255	H. sapiens	MTCL1	microtubule crosslinking factor 1	GO:0090314 positive regulation of protein targeting to membrane;GO:0090313 regulation of protein targeting to membrane;GO:0045197 establishment or maintenance of epithelial cell apical/basal polarity		Predicted intracellular proteins					0.0	0.0	0.0	0.0	0.0	0.0	0.0	0.0	0.0	0.0	0.0	0.0	1.0	0.0	0.0	0.0	0.0	0.0	0.0	0.0
MTHFS	10588	symbol	H. sapiens	10588	H. sapiens	MTHFS	methenyltetrahydrofolate synthetase	GO:0046657 folic acid catabolic process;GO:0042365 water-soluble vitamin catabolic process;GO:0009397 folic acid-containing compound catabolic process		Predicted intracellular proteins; Enzymes; ENZYME proteins:Ligase	Cytosol (Supported)				0.0	0.0	0.0	0.0	0.0	0.0	0.0	0.0	0.0	0.0	0.0	0.0	0.0	0.0	0.0	0.0	0.0	0.0	0.0	0.0
MTMR4	9110	symbol	H. sapiens	9110	H. sapiens	MTMR4	myotubularin related protein 4	GO:0060304 regulation of phosphatidylinositol dephosphorylation;GO:0046856 phosphatidylinositol dephosphorylation;GO:1903725 regulation of phospholipid metabolic process		Predicted intracellular proteins; ENZYME proteins:Hydrolases; Enzymes					0.0	0.0	0.0	0.0	0.0	0.0	0.0	0.0	0.0	0.0	0.0	0.0	0.0	0.0	0.0	0.0	0.0	0.0	0.0	1.0
MVD	4597	symbol	H. sapiens	4597	H. sapiens	MVD	mevalonate diphosphate decarboxylase	GO:0019287 isopentenyl diphosphate biosynthetic process, mevalonate pathway;GO:0009240 isopentenyl diphosphate biosynthetic process;GO:0046490 isopentenyl diphosphate metabolic process		ENZYME proteins:Lyases; Predicted intracellular proteins; Enzymes; Disease related genes; Potential drug targets	Cytosol (Approved); Additional: Cell Junctions			(M5892)HALLMARK CHOLESTEROL HOMEOSTASIS; (M5915)HALLMARK APICAL JUNCTION	0.0	0.0	0.0	0.0	0.0	0.0	0.0	0.0	0.0	0.0	0.0	0.0	0.0	0.0	0.0	0.0	0.0	0.0	0.0	0.0
MYPN	84665	symbol	H. sapiens	84665	H. sapiens	MYPN	myopalladin	GO:0070593 dendrite self-avoidance;GO:0045214 sarcomere organization;GO:0008038 neuron recognition		Predicted intracellular proteins; Disease related genes	Nucleoplasm;Vesicles (Approved); Additional: Cytosol				0.0	0.0	0.0	1.0	0.0	0.0	0.0	0.0	0.0	0.0	1.0	0.0	0.0	0.0	0.0	0.0	0.0	0.0	0.0	0.0
MYRIP	25924	symbol	H. sapiens	25924	H. sapiens	MYRIP	myosin VIIA and Rab interacting protein	GO:0032024 positive regulation of insulin secretion;GO:0090277 positive regulation of peptide hormone secretion;GO:0002793 positive regulation of peptide secretion		Predicted intracellular proteins	Golgi apparatus;Nucleoli fibrillar center;Nucleoplasm (Approved)				0.0	0.0	0.0	0.0	0.0	0.0	0.0	0.0	0.0	0.0	0.0	0.0	0.0	0.0	0.0	0.0	0.0	0.0	0.0	0.0
NABP2	79035	symbol	H. sapiens	79035	H. sapiens	NABP2	nucleic acid binding protein 2	GO:0070200 establishment of protein localization to telomere;GO:1904355 positive regulation of telomere capping;GO:0070199 establishment of protein localization to chromosome		Predicted intracellular proteins	Nucleoplasm (Enhanced)				1.0	0.0	0.0	0.0	0.0	0.0	0.0	0.0	1.0	0.0	0.0	0.0	0.0	0.0	0.0	0.0	0.0	0.0	0.0	0.0
NAT14	57106	symbol	H. sapiens	57106	H. sapiens	NAT14	N-acetyltransferase 14 (putative)	GO:0006352 DNA-templated transcription, initiation;GO:0045893 positive regulation of transcription, DNA-templated;GO:1903508 positive regulation of nucleic acid-templated transcription		Predicted intracellular proteins	Mitochondria (Approved)				1.0	0.0	0.0	0.0	0.0	0.0	0.0	0.0	0.0	0.0	0.0	0.0	0.0	0.0	0.0	0.0	0.0	0.0	0.0	0.0
NBL1	4681	symbol	H. sapiens	4681	H. sapiens	NBL1	NBL1, DAN family BMP antagonist	GO:0038098 sequestering of BMP from receptor via BMP binding;GO:0035582 sequestering of BMP in extracellular matrix;GO:0090027 negative regulation of monocyte chemotaxis		Predicted intracellular proteins; Predicted secreted proteins				(M5906)HALLMARK ESTROGEN RESPONSE EARLY; (M5907)HALLMARK ESTROGEN RESPONSE LATE	0.0	0.0	0.0	0.0	0.0	0.0	0.0	0.0	0.0	0.0	1.0	0.0	0.0	0.0	0.0	0.0	0.0	0.0	1.0	1.0
NCDN	23154	symbol	H. sapiens	23154	H. sapiens	NCDN	neurochondrin	GO:0048168 regulation of neuronal synaptic plasticity;GO:0045453 bone resorption;GO:0046849 bone remodeling		Predicted intracellular proteins	Cytosol (Supported)				0.0	0.0	0.0	0.0	0.0	0.0	0.0	0.0	0.0	0.0	0.0	0.0	0.0	0.0	0.0	0.0	0.0	0.0	0.0	0.0
NEDD4L	23327	symbol	H. sapiens	23327	H. sapiens	NEDD4L	NEDD4 like E3 ubiquitin protein ligase	GO:2001288 positive regulation of caveolin-mediated endocytosis;GO:2001286 regulation of caveolin-mediated endocytosis;GO:2000009 negative regulation of protein localization to cell surface		ENZYME proteins:Transferases; Predicted intracellular proteins; Enzymes; Disease related genes; Cancer-related genes:Mutational cancer driver genes; Potential drug targets			(M286)PID TGFBR PATHWAY; (M187)PID TRKR PATHWAY; (M19)PID P73PATHWAY	(M5891)HALLMARK HYPOXIA	0.0	0.0	0.0	0.0	0.0	0.0	0.0	0.0	0.0	0.0	1.0	0.0	1.0	1.0	0.0	0.0	0.0	0.0	0.0	0.0
NEFH	4744	symbol	H. sapiens	4744	H. sapiens	NEFH	neurofilament heavy chain	GO:0048936 peripheral nervous system neuron axonogenesis;GO:0033693 neurofilament bundle assembly;GO:0099185 postsynaptic intermediate filament cytoskeleton organization		Predicted intracellular proteins; Disease related genes				(M5951)HALLMARK SPERMATOGENESIS; (M5902)HALLMARK APOPTOSIS	0.0	0.0	0.0	0.0	0.0	0.0	0.0	0.0	0.0	0.0	1.0	0.0	1.0	0.0	0.0	1.0	0.0	0.0	0.0	0.0
NEFL	4747	symbol	H. sapiens	4747	H. sapiens	NEFL	neurofilament light chain	GO:0045105 intermediate filament polymerization or depolymerization;GO:1903937 response to acrylamide;GO:0033693 neurofilament bundle assembly		Predicted intracellular proteins; Disease related genes	Intermediate filaments;Nucleoplasm (Approved); Additional: Midbody				0.0	0.0	0.0	0.0	1.0	0.0	0.0	0.0	0.0	0.0	1.0	0.0	0.0	0.0	0.0	1.0	0.0	1.0	0.0	0.0
NEIL2	252969	symbol	H. sapiens	252969	H. sapiens	NEIL2	nei like DNA glycosylase 2	GO:0045008 depyrimidination;GO:0006285 base-excision repair, AP site formation;GO:0009223 pyrimidine deoxyribonucleotide catabolic process		Predicted intracellular proteins; Enzymes; ENZYME proteins:Lyases	Nucleoplasm (Supported); Additional: Vesicles	Iron; Copper; Ferrous gluconate; Ferrous succinate; Ferrous ascorbate; Ferrous fumarate; Ferrous glycine sulfate			1.0	0.0	0.0	0.0	0.0	0.0	0.0	0.0	0.0	0.0	0.0	0.0	0.0	0.0	0.0	0.0	0.0	0.0	0.0	0.0
NEK10	152110	symbol	H. sapiens	152110	H. sapiens	NEK10	NIMA related kinase 10	GO:0120197 mucociliary clearance;GO:0031954 positive regulation of protein autophosphorylation;GO:0003351 epithelial cilium movement involved in extracellular fluid movement	NEK Ser/Thr protein kinase family	ENZYME proteins:Transferases; Predicted intracellular proteins; Kinases:NEK Ser/Thr protein kinases; Enzymes	Vesicles (Approved); Additional: Nucleoplasm				0.0	0.0	0.0	0.0	0.0	0.0	0.0	0.0	0.0	0.0	0.0	0.0	0.0	0.0	0.0	0.0	0.0	0.0	0.0	0.0
NES	10763	symbol	H. sapiens	10763	H. sapiens	NES	nestin	GO:0030842 regulation of intermediate filament depolymerization;GO:0030844 positive regulation of intermediate filament depolymerization;GO:0045106 intermediate filament depolymerization		Predicted intracellular proteins	Intermediate filaments (Enhanced)				0.0	0.0	0.0	1.0	1.0	0.0	0.0	0.0	0.0	1.0	1.0	0.0	0.0	0.0	1.0	0.0	0.0	1.0	0.0	0.0
NF2	4771	symbol	H. sapiens	4771	H. sapiens	NF2	neurofibromin 2	GO:0014010 Schwann cell proliferation;GO:0042532 negative regulation of tyrosine phosphorylation of STAT protein;GO:0035330 regulation of hippo signaling		Predicted intracellular proteins; Disease related genes; Cancer-related genes	Plasma membrane (Enhanced); Additional: Cytosol;Nucleoplasm		(M175)PID ERBB2 ERBB3 PATHWAY	(M5951)HALLMARK SPERMATOGENESIS; (M5915)HALLMARK APICAL JUNCTION	1.0	0.0	0.0	1.0	1.0	0.0	1.0	0.0	0.0	1.0	0.0	1.0	1.0	0.0	1.0	0.0	0.0	0.0	0.0	0.0
NFE2L3	9603	symbol	H. sapiens	9603	H. sapiens	NFE2L3	nuclear factor, erythroid 2 like 3	GO:0000122 negative regulation of transcription by RNA polymerase II;GO:0045892 negative regulation of transcription, DNA-templated;GO:1903507 negative regulation of nucleic acid-templated transcription		Predicted intracellular proteins; Transcription factors:Basic domains	Nucleoplasm;Vesicles (Approved)				0.0	0.0	0.0	0.0	0.0	0.0	0.0	0.0	0.0	0.0	0.0	0.0	0.0	0.0	0.0	0.0	0.0	0.0	0.0	0.0
NFKBIE	4794	symbol	H. sapiens	4794	H. sapiens	NFKBIE	NFKB inhibitor epsilon	GO:0042994 cytoplasmic sequestering of transcription factor;GO:0051220 cytoplasmic sequestering of protein;GO:0045185 maintenance of protein location		Cancer-related genes:Candidate cancer biomarkers; Predicted intracellular proteins; Transcription factors:Immunoglobulin fold	Nucleoli fibrillar center (Supported); Additional: Cytosol;Nucleoplasm		(M7416)ST GAQ PATHWAY; (M18030)ST TUMOR NECROSIS FACTOR PATHWAY; (M12705)SIG CD40PATHWAYMAP	(M5890)HALLMARK TNFA SIGNALING VIA NFKB	0.0	0.0	0.0	0.0	0.0	0.0	0.0	0.0	0.0	0.0	0.0	0.0	0.0	0.0	0.0	0.0	0.0	0.0	0.0	0.0
NLGN4X	57502	symbol	H. sapiens	57502	H. sapiens	NLGN4X	neuroligin 4 X-linked	GO:0003360 brainstem development;GO:0097105 presynaptic membrane assembly;GO:0090394 negative regulation of excitatory postsynaptic potential		Predicted intracellular proteins; Disease related genes					0.0	0.0	0.0	0.0	1.0	0.0	1.0	0.0	0.0	0.0	0.0	0.0	0.0	1.0	0.0	0.0	0.0	0.0	0.0	0.0
NLRP10	338322	symbol	H. sapiens	338322	H. sapiens	NLRP10	NLR family pyrin domain containing 10	GO:0032730 positive regulation of interleukin-1 alpha production;GO:1900426 positive regulation of defense response to bacterium;GO:0032610 interleukin-1 alpha production		Predicted intracellular proteins	Nucleoplasm (Approved); Additional: Nuclear membrane				0.0	0.0	0.0	0.0	0.0	0.0	0.0	0.0	0.0	0.0	0.0	0.0	0.0	0.0	0.0	0.0	0.0	0.0	0.0	0.0
NME2	4831	symbol	H. sapiens	4831	H. sapiens	NME2	NME/NM23 nucleoside diphosphate kinase 2	GO:0018106 peptidyl-histidine phosphorylation;GO:0006228 UTP biosynthetic process;GO:0006183 GTP biosynthetic process		Cancer-related genes:Candidate cancer biomarkers; Predicted intracellular proteins; ENZYME proteins:Transferases; Enzymes	Cytosol (Supported); Additional: Midbody ring;Plasma membrane		(M66)PID MYC ACTIV PATHWAY		1.0	0.0	0.0	0.0	0.0	0.0	0.0	0.0	0.0	0.0	1.0	1.0	0.0	0.0	0.0	0.0	1.0	0.0	0.0	0.0
NNAT	4826	symbol	H. sapiens	4826	H. sapiens	NNAT	neuronatin	GO:0009249 protein lipoylation;GO:0032024 positive regulation of insulin secretion;GO:0090277 positive regulation of peptide hormone secretion							0.0	0.0	0.0	0.0	1.0	0.0	0.0	0.0	0.0	0.0	0.0	0.0	0.0	0.0	0.0	0.0	0.0	0.0	0.0	0.0
NOCT	25819	symbol	H. sapiens	25819	H. sapiens	NOCT	nocturnin	GO:0000290 deadenylation-dependent decapping of nuclear-transcribed mRNA;GO:0110156 methylguanosine-cap decapping;GO:0110154 RNA decapping		Predicted intracellular proteins; ENZYME proteins:Hydrolases; Enzymes	Nuclear bodies (Supported); Additional: Cytosol;Nucleoplasm			(M5891)HALLMARK HYPOXIA	1.0	0.0	0.0	0.0	0.0	0.0	0.0	0.0	0.0	0.0	0.0	0.0	0.0	0.0	0.0	0.0	1.0	0.0	0.0	0.0
NOS1	4842	symbol	H. sapiens	4842	H. sapiens	NOS1	nitric oxide synthase 1	GO:0098923 retrograde trans-synaptic signaling by soluble gas;GO:0098924 retrograde trans-synaptic signaling by nitric oxide;GO:0051581 negative regulation of neurotransmitter uptake		Cancer-related genes:Candidate cancer biomarkers; Predicted intracellular proteins; FDA approved drug targets:Small molecule drugs; Enzymes; ENZYME proteins:Oxidoreductases	Plasma membrane (Supported); Additional: Nucleoplasm	Citrulline; Donepezil; Ketamine; L-N(omega)-Nitroarginine-2,4-L-diaminobutyric amide; Formic acid; 3-Bromo-7-Nitroindazole; N-{(4S)-4-Amino-5-[(2-aminoethyl)amino]pentyl}-N'-nitroguanidine; N-[3-(aminomethyl)benzyl]acetamidine; L-N(omega)-nitroarginine-(4R)-amino-L-proline amide; 1-hydroxy-2-isopropylguanidine; N-omega-propyl-L-arginine; 2-butyl-1-hydroxyguanidine; S-Ethyl-N-[4-(Trifluoromethyl)P…		(M5951)HALLMARK SPERMATOGENESIS; (M5909)HALLMARK MYOGENESIS; (M5956)HALLMARK KRAS SIGNALING DN	0.0	0.0	1.0	1.0	0.0	0.0	0.0	0.0	0.0	0.0	0.0	0.0	0.0	0.0	0.0	1.0	0.0	0.0	0.0	1.0
NPM3	10360	symbol	H. sapiens	10360	H. sapiens	NPM3	nucleophosmin/nucleoplasmin 3	GO:0009303 rRNA transcription;GO:0098781 ncRNA transcription;GO:0006338 chromatin remodeling		Predicted intracellular proteins	Actin filaments;Cytosol;Nucleoli (Approved)				0.0	0.0	0.0	0.0	0.0	0.0	0.0	0.0	0.0	0.0	0.0	0.0	0.0	0.0	0.0	0.0	0.0	0.0	0.0	0.0
NPTX1	4884	symbol	H. sapiens	4884	H. sapiens	NPTX1	neuronal pentraxin 1	GO:0060385 axonogenesis involved in innervation;GO:0098962 regulation of postsynaptic neurotransmitter receptor activity;GO:0060384 innervation		Transporters:Transporter channels and pores; Predicted secreted proteins					0.0	0.0	0.0	0.0	0.0	0.0	0.0	0.0	0.0	0.0	1.0	0.0	0.0	0.0	0.0	0.0	0.0	0.0	0.0	0.0
NTRK2	4915	symbol	H. sapiens	4915	H. sapiens	NTRK2	neurotrophic receptor tyrosine kinase 2	GO:0099540 trans-synaptic signaling by neuropeptide;GO:0099551 trans-synaptic signaling by neuropeptide, modulating synaptic transmission;GO:0099183 trans-synaptic signaling by BDNF, modulating synaptic transmission	Tyr protein kinase family	Cancer-related genes:Candidate cancer biomarkers; ENZYME proteins:Transferases; Kinases:Tyr protein kinases; RAS pathway related proteins; Enzymes; Disease related genes; Potential drug targets	Cytosol (Approved)	Amitriptyline; Esketamine; Entrectinib; Fostamatinib; Larotrectinib	(M142)PID AJDISS 2PATHWAY; (M100)PID SHP2 PATHWAY; (M187)PID TRKR PATHWAY		1.0	0.0	0.0	0.0	1.0	0.0	0.0	0.0	0.0	1.0	1.0	0.0	0.0	0.0	0.0	0.0	0.0	1.0	0.0	1.0
NUDT3	11165	symbol	H. sapiens	11165	H. sapiens	NUDT3	nudix hydrolase 3	GO:0071544 diphosphoinositol polyphosphate catabolic process;GO:0071543 diphosphoinositol polyphosphate metabolic process;GO:1901906 diadenosine pentaphosphate metabolic process		Predicted intracellular proteins; ENZYME proteins:Hydrolases; Enzymes	Cytosol (Approved)				0.0	0.0	0.0	0.0	0.0	0.0	0.0	0.0	0.0	0.0	0.0	0.0	0.0	0.0	0.0	0.0	0.0	0.0	0.0	0.0
NUTM2D	728130	symbol	H. sapiens	728130	H. sapiens	NUTM2D	NUT family member 2D			Predicted intracellular proteins	Nuclear bodies (Approved)				0.0	0.0	0.0	0.0	0.0	0.0	0.0	0.0	0.0	0.0	0.0	0.0	0.0	0.0	0.0	0.0	0.0	0.0	0.0	0.0
OLFML2A	169611	symbol	H. sapiens	169611	H. sapiens	OLFML2A	olfactomedin like 2A	GO:0030198 extracellular matrix organization;GO:0043062 extracellular structure organization;GO:0045229 external encapsulating structure organization		Predicted intracellular proteins; Predicted secreted proteins	Cytosol;Nucleoplasm (Approved)				0.0	0.0	0.0	0.0	0.0	0.0	0.0	0.0	0.0	0.0	0.0	0.0	0.0	0.0	0.0	0.0	0.0	0.0	0.0	0.0
OR1N1	138883	symbol	H. sapiens	138883	H. sapiens	OR1N1	olfactory receptor family 1 subfamily N member 1	GO:0050911 detection of chemical stimulus involved in sensory perception of smell;GO:0007608 sensory perception of smell;GO:0050907 detection of chemical stimulus involved in sensory perception		G-protein coupled receptors:Odorant/olfactory and gustatory receptors					0.0	0.0	0.0	0.0	0.0	0.0	0.0	0.0	0.0	0.0	0.0	0.0	0.0	0.0	0.0	0.0	0.0	0.0	0.0	0.0
PAM16	51025	symbol	H. sapiens	51025	H. sapiens	PAM16	presequence translocase associated motor 16	GO:1902511 negative regulation of apoptotic DNA fragmentation;GO:1903625 negative regulation of DNA catabolic process;GO:1902510 regulation of apoptotic DNA fragmentation		Predicted intracellular proteins; Disease related genes	Mitochondria;Nucleoplasm (Approved); Additional: Microtubules				0.0	0.0	0.0	0.0	0.0	0.0	0.0	1.0	0.0	0.0	0.0	0.0	0.0	0.0	0.0	0.0	1.0	0.0	0.0	0.0
PANK4	55229	symbol	H. sapiens	55229	H. sapiens	PANK4	pantothenate kinase 4 (inactive)	GO:0015937 coenzyme A biosynthetic process;GO:0015936 coenzyme A metabolic process;GO:0033866 nucleoside bisphosphate biosynthetic process		ENZYME proteins:Transferases; Predicted intracellular proteins; Enzymes	Cytosol (Approved)				0.0	0.0	0.0	0.0	0.0	0.0	0.0	0.0	0.0	0.0	0.0	0.0	0.0	0.0	0.0	0.0	0.0	0.0	0.0	0.0
PATZ1	23598	symbol	H. sapiens	23598	H. sapiens	PATZ1	POZ/BTB and AT hook containing zinc finger 1	GO:0010596 negative regulation of endothelial cell migration;GO:0010633 negative regulation of epithelial cell migration;GO:0008584 male gonad development		Transcription factors:Zinc-coordinating DNA-binding domains; Disease related genes; Cancer-related genes; Predicted intracellular proteins	Nucleoplasm (Supported)		(M58)PID AR PATHWAY		0.0	0.0	0.0	0.0	0.0	0.0	0.0	0.0	0.0	0.0	0.0	0.0	0.0	0.0	0.0	0.0	0.0	0.0	0.0	0.0
PCSK2	5126	symbol	H. sapiens	5126	H. sapiens	PCSK2	proprotein convertase subtilisin/kexin type 2	GO:0030070 insulin processing;GO:0034231 islet amyloid polypeptide processing;GO:0034230 enkephalin processing		Predicted intracellular proteins; Predicted secreted proteins; Peptidases:Serine-type peptidases; ENZYME proteins:Hydrolases; Enzymes	Vesicles (Approved)	Insulin pork		(M5957)HALLMARK PANCREAS BETA CELLS	0.0	0.0	0.0	0.0	0.0	0.0	0.0	0.0	0.0	0.0	0.0	0.0	0.0	0.0	0.0	0.0	0.0	0.0	0.0	0.0
PCYT2	5833	symbol	H. sapiens	5833	H. sapiens	PCYT2	phosphate cytidylyltransferase 2, ethanolamine	GO:0006646 phosphatidylethanolamine biosynthetic process;GO:0046337 phosphatidylethanolamine metabolic process;GO:0046474 glycerophospholipid biosynthetic process		ENZYME proteins:Transferases; Predicted intracellular proteins; Enzymes	Cytosol (Approved); Additional: Nucleoplasm			(M5892)HALLMARK CHOLESTEROL HOMEOSTASIS	0.0	0.0	0.0	0.0	0.0	0.0	0.0	0.0	0.0	0.0	0.0	0.0	0.0	0.0	0.0	0.0	0.0	0.0	0.0	0.0
PDE4D	5144	symbol	H. sapiens	5144	H. sapiens	PDE4D	phosphodiesterase 4D	GO:0086024 adenylate cyclase-activating adrenergic receptor signaling pathway involved in positive regulation of heart rate;GO:1901898 negative regulation of relaxation of cardiac muscle;GO:0140200 adenylate cyclase-activating adrenergic receptor signaling pathway involved in regulation of heart rate		Predicted intracellular proteins; FDA approved drug targets:Small molecule drugs; ENZYME proteins:Hydrolases; Enzymes; Disease related genes	Plasma membrane (Supported); Additional: Cytosol	Adenosine phosphate; Dyphylline; Iloprost; Roflumilast; Piclamilast; Rolipram; 3,5-Dimethyl-1-(3-Nitrophenyl)-1h-Pyrazole-4-Carboxylic Acid Ethyl Ester; 2-[3-(2-Hydroxy-1,1-Dihydroxymethyl-Ethylamino)-Propylamino]-2-Hydroxymethyl-Propane-1,3-Diol; Zardaverine; 1-(4-Aminophenyl)-3,5-Dimethyl-1h-Pyrazole-4-Carboxylic Acid Ethyl Ester; (S)-Rolipram; Cilomilast; (R)-Rolipram; 3,5-Dimethyl-1h-Pyrazole…			0.0	0.0	0.0	0.0	0.0	0.0	0.0	0.0	0.0	0.0	0.0	1.0	0.0	0.0	0.0	0.0	0.0	0.0	0.0	0.0
PDE6B	5158	symbol	H. sapiens	5158	H. sapiens	PDE6B	phosphodiesterase 6B	GO:1990009 retinal cell apoptotic process;GO:0007603 phototransduction, visible light;GO:0043153 entrainment of circadian clock by photoperiod		Predicted intracellular proteins; FDA approved drug targets:Small molecule drugs; ENZYME proteins:Hydrolases; Enzymes; Disease related genes	Cytosol (Approved)		(M16518)ST WNT CA2 CYCLIC GMP PATHWAY; (M204)PID RHODOPSIN PATHWAY	(M5956)HALLMARK KRAS SIGNALING DN	1.0	0.0	0.0	0.0	0.0	0.0	0.0	0.0	0.0	1.0	0.0	0.0	0.0	0.0	0.0	0.0	0.0	0.0	0.0	0.0
PDF	64146	symbol	H. sapiens	64146	H. sapiens	PDF	peptide deformylase, mitochondrial	GO:0043686 co-translational protein modification;GO:0018206 peptidyl-methionine modification;GO:0031365 N-terminal protein amino acid modification		Predicted intracellular proteins; ENZYME proteins:Hydrolases; Enzymes	Mitochondria (Approved); Additional: Nucleoplasm	2-[(Formyl-Hydroxy-Amino)-Methyl]-Heptanoic Acid [1-(2-Hydroxymethyl-Pyrrolidine-1-Carbonyl)-2-Methyl-Propyl]-Amide; Bb-3497			0.0	0.0	0.0	0.0	0.0	0.0	0.0	0.0	0.0	0.0	0.0	0.0	0.0	0.0	0.0	0.0	0.0	0.0	0.0	0.0
PEG3	5178	symbol	H. sapiens	5178	H. sapiens	PEG3	paternally expressed 3	GO:0000122 negative regulation of transcription by RNA polymerase II;GO:0045944 positive regulation of transcription by RNA polymerase II;GO:0045892 negative regulation of transcription, DNA-templated		Transcription factors:Zinc-coordinating DNA-binding domains; Predicted intracellular proteins	Nucleoplasm (Approved)			(M5953)HALLMARK KRAS SIGNALING UP	0.0	0.0	0.0	0.0	0.0	0.0	0.0	0.0	0.0	0.0	0.0	0.0	0.0	0.0	0.0	0.0	0.0	0.0	0.0	0.0
PKD1L2	114780	symbol	H. sapiens	114780	H. sapiens	PKD1L2	polycystin 1 like 2 (gene/pseudogene)	GO:0050982 detection of mechanical stimulus;GO:0009581 detection of external stimulus;GO:0009582 detection of abiotic stimulus							0.0	0.0	0.0	0.0	0.0	0.0	0.0	0.0	0.0	0.0	0.0	0.0	0.0	0.0	0.0	0.0	0.0	0.0	0.0	0.0
PKI55	150967	gene_synonym	H. sapiens	150967	H. sapiens	LINC01963	long intergenic non-protein coding RNA 1963								0.0	0.0	0.0	0.0	0.0	0.0	0.0	0.0	0.0	0.0	0.0	0.0	0.0	0.0	0.0	0.0	0.0	0.0	0.0	0.0
PLAU	5328	symbol	H. sapiens	5328	H. sapiens	PLAU	plasminogen activator, urokinase	GO:2000097 regulation of smooth muscle cell-matrix adhesion;GO:0061302 smooth muscle cell-matrix adhesion;GO:0031639 plasminogen activation		Cancer-related genes:Candidate cancer biomarkers; FDA approved drug targets:Biotech drugs; Predicted intracellular proteins; Predicted secreted proteins; Peptidases:Serine-type peptidases; ENZYME proteins:Hydrolases; Enzymes; Disease related genes		Amiloride; 2-{2-hydroxy-[1,1'-biphenyl]-3-yl}-1H-1,3-benzodiazole-5-carboximidamide; 2-(2-Hydroxy-5-Methoxy-Phenyl)-1h-Benzoimidazole-5-Carboxamidine; 6-(N-Phenylcarbamyl)-2-Naphthalenecarboxamidine; 2-(2-hydroxy-phenyl)-3H-benzoimidazole-5-carboxamidine; 6-[N-(4-(Aminomethyl)Phenyl)Carbamyl]-2-Naphthalenecarboxamidine; 6-[N-(1-Isopropyl-3,4-Dihydro-7-Isoquinolinyl)Carbamyl]-2-Naphthalenecarboxam…	(M212)PID INTEGRIN5 PATHWAY; (M169)PID INTEGRIN2 PATHWAY; (M63)PID AVB3 OPN PATHWAY	(M5946)HALLMARK COAGULATION; (M5890)HALLMARK TNFA SIGNALING VIA NFKB; (M5953)HALLMARK KRAS SIGNALING UP	0.0	0.0	1.0	0.0	0.0	0.0	1.0	0.0	0.0	0.0	0.0	0.0	0.0	0.0	0.0	0.0	0.0	0.0	0.0	0.0
PLCB1	23236	symbol	H. sapiens	23236	H. sapiens	PLCB1	phospholipase C beta 1	GO:0060466 activation of meiosis involved in egg activation;GO:2000438 negative regulation of monocyte extravasation;GO:0035724 CD24 biosynthetic process		Predicted intracellular proteins; ENZYME proteins:Hydrolases; Enzymes; Disease related genes; Potential drug targets	Plasma membrane (Approved)		(M252)PID IL8 CXCR1 PATHWAY; (M213)PID AR NONGENOMIC PATHWAY; (M210)PID IL8 CXCR2 PATHWAY	(M5923)HALLMARK PI3K AKT MTOR SIGNALING	1.0	0.0	0.0	1.0	1.0	0.0	1.0	0.0	0.0	0.0	0.0	1.0	0.0	1.0	0.0	0.0	0.0	0.0	0.0	0.0
PLCH2	9651	symbol	H. sapiens	9651	H. sapiens	PLCH2	phospholipase C eta 2	GO:0046488 phosphatidylinositol metabolic process;GO:0048015 phosphatidylinositol-mediated signaling;GO:0048017 inositol lipid-mediated signaling		Predicted intracellular proteins; ENZYME proteins:Hydrolases; Enzymes					0.0	0.0	0.0	0.0	0.0	0.0	0.0	0.0	0.0	0.0	0.0	0.0	0.0	0.0	0.0	0.0	0.0	0.0	0.0	0.0
PLEKHG4B	153478	symbol	H. sapiens	153478	H. sapiens	PLEKHG4B	pleckstrin homology and RhoGEF domain containing G4B	GO:0051056 regulation of small GTPase mediated signal transduction;GO:0007264 small GTPase mediated signal transduction;GO:1902531 regulation of intracellular signal transduction		Predicted intracellular proteins	Nucleoplasm (Approved)				1.0	0.0	0.0	0.0	0.0	0.0	0.0	0.0	0.0	0.0	0.0	0.0	0.0	0.0	0.0	0.0	0.0	0.0	0.0	0.0
PLEKHG6	55200	symbol	H. sapiens	55200	H. sapiens	PLEKHG6	pleckstrin homology and RhoGEF domain containing G6	GO:0051056 regulation of small GTPase mediated signal transduction;GO:0007264 small GTPase mediated signal transduction;GO:1902531 regulation of intracellular signal transduction		Predicted intracellular proteins	Cell Junctions (Supported); Additional: Centrosome		(M68)PID RHOA REG PATHWAY		1.0	0.0	0.0	0.0	0.0	0.0	0.0	0.0	0.0	0.0	0.0	0.0	0.0	0.0	0.0	0.0	0.0	0.0	0.0	0.0
PLSCR3	57048	symbol	H. sapiens	57048	H. sapiens	PLSCR3	phospholipid scramblase 3	GO:0032049 cardiolipin biosynthetic process;GO:0006655 phosphatidylglycerol biosynthetic process;GO:0032048 cardiolipin metabolic process		Predicted intracellular proteins; Transporters	Mitochondria (Supported)				0.0	0.0	0.0	0.0	0.0	0.0	0.0	0.0	0.0	0.0	0.0	0.0	0.0	0.0	0.0	0.0	0.0	0.0	0.0	0.0
PLXDC1	57125	symbol	H. sapiens	57125	H. sapiens	PLXDC1	plexin domain containing 1	GO:0021510 spinal cord development;GO:0001525 angiogenesis;GO:0048514 blood vessel morphogenesis		Predicted intracellular proteins			(M5880)NABA ECM AFFILIATED; (M5885)NABA MATRISOME ASSOCIATED; (M5889)NABA MATRISOME		0.0	0.0	0.0	0.0	0.0	0.0	0.0	0.0	0.0	0.0	0.0	0.0	0.0	0.0	0.0	0.0	0.0	0.0	0.0	0.0
POMK	84197	symbol	H. sapiens	84197	H. sapiens	POMK	protein O-mannose kinase	GO:0046835 carbohydrate phosphorylation;GO:0006493 protein O-linked glycosylation;GO:0019233 sensory perception of pain	Other	ENZYME proteins:Transferases; Kinases; Enzymes; Disease related genes; Potential drug targets	Nucleoplasm (Approved); Additional: Cytosol				0.0	0.0	0.0	0.0	1.0	0.0	0.0	0.0	0.0	0.0	0.0	0.0	0.0	0.0	0.0	0.0	0.0	0.0	0.0	0.0
POU3F3	5455	symbol	H. sapiens	5455	H. sapiens	POU3F3	POU class 3 homeobox 3	GO:0072024 macula densa development;GO:0072051 juxtaglomerular apparatus development;GO:0072206 metanephric juxtaglomerular apparatus development		Predicted intracellular proteins; Transcription factors:Helix-turn-helix domains	Nucleoplasm (Enhanced)				0.0	0.0	0.0	0.0	1.0	0.0	0.0	0.0	0.0	0.0	0.0	0.0	0.0	0.0	1.0	0.0	0.0	0.0	0.0	0.0
POU5F1P5	100009667	symbol	H. sapiens	100009667	H. sapiens	POU5F1P5	POU class 5 homeobox 1 pseudogene 5								0.0	0.0	0.0	0.0	0.0	0.0	0.0	0.0	0.0	0.0	0.0	0.0	0.0	0.0	0.0	0.0	0.0	0.0	0.0	0.0
PPA1	5464	symbol	H. sapiens	5464	H. sapiens	PPA1	inorganic pyrophosphatase 1	GO:0006796 phosphate-containing compound metabolic process;GO:0006793 phosphorus metabolic process;GO:0044237 cellular metabolic process		Predicted intracellular proteins; ENZYME proteins:Hydrolases; Enzymes	Vesicles (Supported)			(M5924)HALLMARK MTORC1 SIGNALING	0.0	0.0	0.0	0.0	0.0	0.0	0.0	0.0	0.0	0.0	0.0	0.0	0.0	0.0	0.0	0.0	0.0	0.0	0.0	0.0
PPM1L	151742	symbol	H. sapiens	151742	H. sapiens	PPM1L	protein phosphatase, Mg2+/Mn2+ dependent 1L	GO:0030148 sphingolipid biosynthetic process;GO:0046467 membrane lipid biosynthetic process;GO:0006665 sphingolipid metabolic process		Predicted intracellular proteins; ENZYME proteins:Hydrolases; Enzymes	Cytosol (Approved); Additional: Nucleoplasm				0.0	0.0	0.0	0.0	0.0	0.0	0.0	0.0	0.0	0.0	0.0	0.0	0.0	0.0	0.0	0.0	0.0	0.0	0.0	1.0
PPP1R3F	89801	symbol	H. sapiens	89801	H. sapiens	PPP1R3F	protein phosphatase 1 regulatory subunit 3F	GO:2000465 regulation of glycogen (starch) synthase activity;GO:0005979 regulation of glycogen biosynthetic process;GO:0010962 regulation of glucan biosynthetic process		Predicted intracellular proteins	Nucleoplasm;Vesicles (Approved)				0.0	0.0	0.0	0.0	0.0	0.0	0.0	0.0	0.0	0.0	0.0	0.0	0.0	0.0	0.0	0.0	0.0	0.0	0.0	0.0
PPP2R2B	5521	symbol	H. sapiens	5521	H. sapiens	PPP2R2B	protein phosphatase 2 regulatory subunit Bbeta	GO:0070262 peptidyl-serine dephosphorylation;GO:0006470 protein dephosphorylation;GO:0016311 dephosphorylation		Predicted intracellular proteins; Disease related genes	Cytosol (Uncertain)		(M46)PID ATR PATHWAY; (M186)PID PDGFRB PATHWAY		0.0	0.0	0.0	0.0	0.0	0.0	1.0	0.0	0.0	0.0	0.0	0.0	0.0	0.0	0.0	0.0	0.0	0.0	0.0	0.0
PRH2	5555	symbol	H. sapiens	5555	H. sapiens	PRH2	proline rich protein HaeIII subfamily 2			Predicted secreted proteins					0.0	0.0	0.0	0.0	0.0	0.0	0.0	0.0	0.0	0.0	0.0	0.0	0.0	0.0	0.0	0.0	0.0	0.0	0.0	0.0
PRKX	5613	symbol	H. sapiens	5613	H. sapiens	PRKX	protein kinase X-linked	GO:2000696 regulation of epithelial cell differentiation involved in kidney development;GO:0035850 epithelial cell differentiation involved in kidney development;GO:0061005 cell differentiation involved in kidney development	AGC Ser/Thr protein kinase family	ENZYME proteins:Transferases; Kinases:AGC Ser/Thr protein kinases; Predicted intracellular proteins; Enzymes; Disease related genes; Potential drug targets	Nucleoplasm (Supported)				1.0	0.0	0.0	1.0	0.0	0.0	0.0	0.0	0.0	0.0	0.0	1.0	0.0	0.0	0.0	0.0	1.0	0.0	0.0	0.0
PRR26	414235	gene_synonym	H. sapiens	414235	H. sapiens	DIP2C-AS1	DIP2C antisense RNA 1								0.0	0.0	0.0	0.0	0.0	0.0	0.0	0.0	0.0	0.0	0.0	0.0	0.0	0.0	0.0	0.0	0.0	0.0	0.0	0.0
PRRT3	285368	symbol	H. sapiens	285368	H. sapiens	PRRT3	proline rich transmembrane protein 3			Predicted intracellular proteins	Plasma membrane (Approved); Additional: Nucleoplasm				0.0	0.0	0.0	0.0	0.0	0.0	0.0	0.0	0.0	0.0	0.0	0.0	0.0	0.0	0.0	0.0	0.0	0.0	0.0	0.0
PRSS12	8492	symbol	H. sapiens	8492	H. sapiens	PRSS12	serine protease 12	GO:0031638 zymogen activation;GO:0016485 protein processing;GO:0051604 protein maturation		Predicted secreted proteins; Peptidases:Serine-type peptidases; Enzymes; Disease related genes; Potential drug targets	Actin filaments (Approved); Additional: Nucleoplasm		(M3468)NABA ECM REGULATORS; (M5885)NABA MATRISOME ASSOCIATED; (M5889)NABA MATRISOME		0.0	0.0	0.0	0.0	0.0	0.0	0.0	0.0	0.0	0.0	0.0	0.0	0.0	0.0	0.0	0.0	0.0	0.0	0.0	0.0
PTGER4	5734	symbol	H. sapiens	5734	H. sapiens	PTGER4	prostaglandin E receptor 4	GO:0072682 eosinophil extravasation;GO:2000419 regulation of eosinophil extravasation;GO:2000420 negative regulation of eosinophil extravasation		FDA approved drug targets:Small molecule drugs; G-protein coupled receptors:GPCRs excl olfactory receptors		Dinoprostone; Misoprostol; Limaprost; Castor oil; Grapiprant		(M5890)HALLMARK TNFA SIGNALING VIA NFKB; (M5932)HALLMARK INFLAMMATORY RESPONSE	0.0	0.0	0.0	1.0	0.0	0.0	1.0	0.0	1.0	0.0	0.0	0.0	0.0	0.0	0.0	0.0	1.0	0.0	0.0	1.0
PTPN14	5784	symbol	H. sapiens	5784	H. sapiens	PTPN14	protein tyrosine phosphatase non-receptor type 14	GO:0001946 lymphangiogenesis;GO:0036303 lymph vessel morphogenesis;GO:0001945 lymph vessel development		Predicted intracellular proteins; ENZYME proteins:Hydrolases; Enzymes; Disease related genes; Potential drug targets	Nucleoplasm (Supported)			(M5939)HALLMARK P53 PATHWAY	0.0	0.0	1.0	0.0	0.0	0.0	0.0	0.0	0.0	0.0	0.0	0.0	1.0	0.0	0.0	0.0	0.0	0.0	0.0	0.0
PTPRQ	374462	symbol	H. sapiens	374462	H. sapiens	PTPRQ	protein tyrosine phosphatase receptor type Q	GO:1990264 peptidyl-tyrosine dephosphorylation involved in inactivation of protein kinase activity;GO:0035335 peptidyl-tyrosine dephosphorylation;GO:0045598 regulation of fat cell differentiation		Predicted intracellular proteins	Cytosol (Approved)				0.0	0.0	0.0	0.0	0.0	0.0	0.0	0.0	0.0	0.0	0.0	0.0	0.0	0.0	0.0	0.0	0.0	0.0	0.0	0.0
PWARSN	347746	symbol	H. sapiens	347746	H. sapiens	PWARSN	Prader Willi/Angelman region RNA, SNRPN neighbor	GO:0006396 RNA processing;GO:0016070 RNA metabolic process;GO:0090304 nucleic acid metabolic process							0.0	0.0	0.0	0.0	0.0	0.0	0.0	0.0	0.0	0.0	0.0	0.0	0.0	0.0	0.0	0.0	0.0	0.0	0.0	0.0
PYCR2	29920	symbol	H. sapiens	29920	H. sapiens	PYCR2	pyrroline-5-carboxylate reductase 2	GO:0006561 proline biosynthetic process;GO:0055129 L-proline biosynthetic process;GO:0006560 proline metabolic process		Predicted intracellular proteins; Enzymes; ENZYME proteins:Oxidoreductases; Disease related genes; Potential drug targets	Mitochondria (Approved)	NADH; Proline			0.0	0.0	0.0	0.0	0.0	0.0	0.0	0.0	0.0	0.0	0.0	0.0	0.0	0.0	0.0	0.0	0.0	0.0	0.0	0.0
QSOX1	5768	symbol	H. sapiens	5768	H. sapiens	QSOX1	quiescin sulfhydryl oxidase 1	GO:0016242 negative regulation of macroautophagy;GO:0085029 extracellular matrix assembly;GO:0010507 negative regulation of autophagy		Predicted intracellular proteins; Predicted secreted proteins; Enzymes; ENZYME proteins:Oxidoreductases	Golgi apparatus (Supported); Additional: Vesicles			(M5930)HALLMARK EPITHELIAL MESENCHYMAL TRANSITION; (M5937)HALLMARK GLYCOLYSIS	0.0	0.0	1.0	0.0	0.0	0.0	0.0	0.0	0.0	0.0	0.0	0.0	0.0	0.0	0.0	0.0	0.0	0.0	0.0	0.0
RAB11FIP1	80223	symbol	H. sapiens	80223	H. sapiens	RAB11FIP1	RAB11 family interacting protein 1	GO:0070164 negative regulation of adiponectin secretion;GO:0070162 adiponectin secretion;GO:0070163 regulation of adiponectin secretion		Predicted intracellular proteins	Vesicles (Enhanced)				0.0	0.0	0.0	0.0	0.0	0.0	0.0	0.0	0.0	0.0	0.0	0.0	0.0	0.0	0.0	0.0	0.0	0.0	0.0	0.0
RAB11FIP4	84440	symbol	H. sapiens	84440	H. sapiens	RAB11FIP4	RAB11 family interacting protein 4	GO:0032456 endocytic recycling;GO:0032465 regulation of cytokinesis;GO:0098876 vesicle-mediated transport to the plasma membrane		Predicted intracellular proteins					0.0	0.0	0.0	0.0	0.0	0.0	0.0	0.0	0.0	0.0	0.0	0.0	0.0	0.0	0.0	0.0	0.0	0.0	0.0	0.0
RAB43	339122	symbol	H. sapiens	339122	H. sapiens	RAB43	RAB43, member RAS oncogene family	GO:0035526 retrograde transport, plasma membrane to Golgi;GO:0090382 phagosome maturation;GO:0019068 virion assembly		Predicted intracellular proteins	Plasma membrane (Supported)				0.0	0.0	0.0	0.0	0.0	0.0	0.0	0.0	0.0	0.0	0.0	0.0	0.0	0.0	0.0	0.0	0.0	0.0	0.0	0.0
RABEPK	10244	symbol	H. sapiens	10244	H. sapiens	RABEPK	Rab9 effector protein with kelch motifs	GO:0006904 vesicle docking involved in exocytosis;GO:0048278 vesicle docking;GO:0140056 organelle localization by membrane tethering		Predicted intracellular proteins	Plasma membrane (Uncertain)			(M5928)HALLMARK MYC TARGETS V2	0.0	0.0	0.0	0.0	0.0	0.0	0.0	0.0	0.0	0.0	0.0	0.0	0.0	0.0	0.0	0.0	0.0	0.0	0.0	0.0
RAP1GAP2	23108	symbol	H. sapiens	23108	H. sapiens	RAP1GAP2	RAP1 GTPase activating protein 2	GO:0090630 activation of GTPase activity;GO:0008361 regulation of cell size;GO:0043547 positive regulation of GTPase activity		Predicted intracellular proteins	Cytosol;Nuclear membrane (Supported)				0.0	0.0	0.0	0.0	0.0	0.0	0.0	0.0	0.0	0.0	0.0	0.0	0.0	0.0	0.0	0.0	0.0	0.0	0.0	0.0
RASL10B	91608	symbol	H. sapiens	91608	H. sapiens	RASL10B	RAS like family 10 member B	GO:0003050 regulation of systemic arterial blood pressure by atrial natriuretic peptide;GO:0001990 regulation of systemic arterial blood pressure by hormone;GO:0003044 regulation of systemic arterial blood pressure mediated by a chemical signal		Predicted intracellular proteins	Vesicles (Approved)				0.0	0.0	0.0	0.0	0.0	0.0	0.0	0.0	0.0	0.0	0.0	0.0	0.0	0.0	0.0	0.0	0.0	0.0	0.0	0.0
RBM4	5936	symbol	H. sapiens	5936	H. sapiens	RBM4	RNA binding motif protein 4	GO:0002192 IRES-dependent translational initiation of linear mRNA;GO:0110017 cap-independent translational initiation of linear mRNA;GO:0032055 negative regulation of translation in response to stress		Predicted intracellular proteins	Nucleoplasm (Approved); Additional: Cytosol			(M5953)HALLMARK KRAS SIGNALING UP	0.0	1.0	0.0	1.0	0.0	0.0	0.0	0.0	0.0	0.0	0.0	0.0	1.0	0.0	0.0	0.0	0.0	0.0	0.0	0.0
RBMS2	5939	symbol	H. sapiens	5939	H. sapiens	RBMS2	RNA binding motif single stranded interacting protein 2	GO:0006396 RNA processing;GO:0016070 RNA metabolic process;GO:0090304 nucleic acid metabolic process		Predicted intracellular proteins	Nucleoli fibrillar center (Approved); Additional: Cytosol;Nucleoplasm				0.0	0.0	0.0	0.0	0.0	0.0	0.0	0.0	0.0	0.0	0.0	0.0	0.0	0.0	0.0	0.0	0.0	0.0	0.0	0.0
RBMXL2	27288	symbol	H. sapiens	27288	H. sapiens	RBMXL2	RBMX like 2	GO:0000377 RNA splicing, via transesterification reactions with bulged adenosine as nucleophile;GO:0000398 mRNA splicing, via spliceosome;GO:0000375 RNA splicing, via transesterification reactions		Predicted intracellular proteins					0.0	0.0	0.0	0.0	0.0	0.0	0.0	0.0	0.0	0.0	0.0	0.0	0.0	0.0	0.0	0.0	0.0	0.0	0.0	0.0
RC3H1	149041	symbol	H. sapiens	149041	H. sapiens	RC3H1	ring finger and CCCH-type domains 1	GO:0002635 negative regulation of germinal center formation;GO:0061470 T follicular helper cell differentiation;GO:0002634 regulation of germinal center formation		Predicted intracellular proteins	Cytosol (Supported); Additional: Golgi apparatus;Plasma membrane				1.0	0.0	0.0	0.0	0.0	0.0	0.0	0.0	0.0	0.0	0.0	0.0	0.0	0.0	0.0	0.0	0.0	0.0	0.0	0.0
RDH14	57665	symbol	H. sapiens	57665	H. sapiens	RDH14	retinol dehydrogenase 14	GO:0042572 retinol metabolic process;GO:0001523 retinoid metabolic process;GO:0016101 diterpenoid metabolic process		Predicted intracellular proteins	Nucleoplasm (Enhanced); Additional: Cytosol	Vitamin A			1.0	0.0	0.0	0.0	0.0	0.0	0.0	0.0	0.0	0.0	0.0	0.0	0.0	0.0	0.0	0.0	1.0	0.0	0.0	0.0
RDH5	5959	symbol	H. sapiens	5959	H. sapiens	RDH5	retinol dehydrogenase 5	GO:0042572 retinol metabolic process;GO:0001523 retinoid metabolic process;GO:0016101 diterpenoid metabolic process		Predicted intracellular proteins; Enzymes; ENZYME proteins:Oxidoreductases; Disease related genes; Potential drug targets	Vesicles (Uncertain)	NADH; Vitamin A	(M117)PID CONE PATHWAY; (M204)PID RHODOPSIN PATHWAY		1.0	0.0	0.0	0.0	0.0	0.0	0.0	0.0	0.0	0.0	0.0	0.0	0.0	0.0	0.0	0.0	0.0	0.0	0.0	0.0
REPIN1	29803	symbol	H. sapiens	29803	H. sapiens	REPIN1	replication initiator 1	GO:0006260 DNA replication;GO:0006357 regulation of transcription by RNA polymerase II;GO:0006366 transcription by RNA polymerase II		Predicted intracellular proteins	Nucleoplasm (Supported)				0.0	0.0	0.0	0.0	0.0	0.0	0.0	0.0	0.0	0.0	0.0	0.0	0.0	0.0	0.0	0.0	0.0	0.0	0.0	0.0
REPS2	9185	symbol	H. sapiens	9185	H. sapiens	REPS2	RALBP1 associated Eps domain containing 2	GO:0007173 epidermal growth factor receptor signaling pathway;GO:0038127 ERBB signaling pathway;GO:0016197 endosomal transport		Predicted intracellular proteins					0.0	0.0	0.0	0.0	0.0	0.0	0.0	0.0	0.0	0.0	0.0	0.0	0.0	0.0	0.0	0.0	0.0	0.0	0.0	0.0
RFXANK	8625	symbol	H. sapiens	8625	H. sapiens	RFXANK	regulatory factor X associated ankyrin containing protein	GO:0007265 Ras protein signal transduction;GO:0007264 small GTPase mediated signal transduction;GO:0045944 positive regulation of transcription by RNA polymerase II		Predicted intracellular proteins; Disease related genes; Transcription factors:Yet undefined DNA-binding domains	Nucleoplasm (Enhanced)		(M30)PID HDAC CLASSII PATHWAY		0.0	0.0	0.0	0.0	0.0	0.0	0.0	0.0	0.0	0.0	0.0	0.0	0.0	0.0	0.0	0.0	0.0	0.0	0.0	0.0
RHOB	388	symbol	H. sapiens	388	H. sapiens	RHOB	ras homolog family member B	GO:0003159 morphogenesis of an endothelium;GO:0061154 endothelial tube morphogenesis;GO:0008333 endosome to lysosome transport		Cancer-related genes:Candidate cancer biomarkers; Predicted intracellular proteins		Botulinum toxin type A	(M153)PID P75 NTR PATHWAY; (M124)PID CXCR4 PATHWAY	(M5941)HALLMARK UV RESPONSE UP; (M5902)HALLMARK APOPTOSIS; (M5947)HALLMARK IL2 STAT5 SIGNALING	1.0	0.0	1.0	1.0	0.0	0.0	0.0	0.0	1.0	0.0	0.0	0.0	0.0	0.0	0.0	0.0	0.0	0.0	1.0	0.0
RMRP	6023	symbol	H. sapiens	6023	H. sapiens	RMRP	RNA component of mitochondrial RNA processing endoribonuclease	GO:0062103 double-stranded RNA biosynthetic process;GO:1903704 negative regulation of production of siRNA involved in RNA interference;GO:1900369 negative regulation of RNA interference							0.0	1.0	1.0	0.0	0.0	0.0	0.0	1.0	0.0	0.0	0.0	0.0	0.0	0.0	0.0	0.0	0.0	0.0	0.0	0.0
RNF138P1	379013	symbol	H. sapiens	379013	H. sapiens	RNF138P1	ring finger protein 138 pseudogene 1								0.0	0.0	0.0	0.0	0.0	0.0	0.0	0.0	0.0	0.0	0.0	0.0	0.0	0.0	0.0	0.0	0.0	0.0	0.0	0.0
RNF144B	255488	symbol	H. sapiens	255488	H. sapiens	RNF144B	ring finger protein 144B	GO:0032436 positive regulation of proteasomal ubiquitin-dependent protein catabolic process;GO:2000060 positive regulation of ubiquitin-dependent protein catabolic process;GO:1901800 positive regulation of proteasomal protein catabolic process		ENZYME proteins:Transferases; Enzymes	Nucleoli (Approved); Additional: Mitochondria		(M145)PID P53 DOWNSTREAM PATHWAY	(M5932)HALLMARK INFLAMMATORY RESPONSE	0.0	0.0	0.0	0.0	0.0	0.0	0.0	0.0	0.0	0.0	0.0	0.0	0.0	0.0	0.0	0.0	0.0	0.0	0.0	0.0
RNF152	220441	symbol	H. sapiens	220441	H. sapiens	RNF152	ring finger protein 152	GO:1904262 negative regulation of TORC1 signaling;GO:1903432 regulation of TORC1 signaling;GO:0032007 negative regulation of TOR signaling		ENZYME proteins:Transferases; Predicted intracellular proteins; Enzymes					0.0	0.0	0.0	0.0	0.0	1.0	0.0	0.0	0.0	0.0	0.0	0.0	0.0	0.0	0.0	0.0	0.0	0.0	0.0	0.0
RNF166	115992	symbol	H. sapiens	115992	H. sapiens	RNF166	ring finger protein 166	GO:0000209 protein polyubiquitination;GO:0006914 autophagy;GO:0061919 process utilizing autophagic mechanism		Predicted intracellular proteins	Nucleoplasm (Approved); Additional: Cytosol;Plasma membrane				0.0	0.0	0.0	0.0	0.0	0.0	0.0	0.0	0.0	0.0	0.0	0.0	0.0	0.0	0.0	0.0	0.0	0.0	0.0	0.0
RNF169	254225	symbol	H. sapiens	254225	H. sapiens	RNF169	ring finger protein 169	GO:2000780 negative regulation of double-strand break repair;GO:0045738 negative regulation of DNA repair;GO:2001021 negative regulation of response to DNA damage stimulus		ENZYME proteins:Transferases; Predicted intracellular proteins; Enzymes	Nuclear bodies;Nucleoplasm (Enhanced); Additional: Cytosol;Nucleoli;Nucleoli rim				0.0	0.0	0.0	0.0	0.0	0.0	0.0	1.0	0.0	0.0	0.0	0.0	0.0	0.0	0.0	0.0	0.0	0.0	0.0	0.0
RNF215	200312	symbol	H. sapiens	200312	H. sapiens	RNF215	ring finger protein 215	GO:0006896 Golgi to vacuole transport;GO:0006623 protein targeting to vacuole;GO:0072666 establishment of protein localization to vacuole		Predicted intracellular proteins	Microtubules (Approved); Additional: Nucleoli				0.0	0.0	0.0	0.0	0.0	0.0	0.0	0.0	0.0	0.0	0.0	0.0	0.0	0.0	0.0	0.0	0.0	0.0	0.0	0.0
RNF41	10193	symbol	H. sapiens	10193	H. sapiens	RNF41	ring finger protein 41	GO:0051865 protein autoubiquitination;GO:2000379 positive regulation of reactive oxygen species metabolic process;GO:2000377 regulation of reactive oxygen species metabolic process		ENZYME proteins:Transferases; Predicted intracellular proteins; Enzymes	Nuclear bodies;Nucleoplasm (Approved); Additional: Midbody ring		(M175)PID ERBB2 ERBB3 PATHWAY		0.0	0.0	0.0	0.0	0.0	0.0	0.0	0.0	0.0	0.0	0.0	0.0	0.0	0.0	0.0	0.0	0.0	0.0	0.0	0.0
RNFT2	84900	symbol	H. sapiens	84900	H. sapiens	RNFT2	ring finger protein, transmembrane 2	GO:1904294 positive regulation of ERAD pathway;GO:1904292 regulation of ERAD pathway;GO:1905898 positive regulation of response to endoplasmic reticulum stress			Nucleoplasm (Approved); Additional: Cytosol				0.0	0.0	0.0	0.0	0.0	0.0	0.0	0.0	0.0	0.0	0.0	0.0	0.0	0.0	0.0	0.0	0.0	0.0	0.0	0.0
RNU11	26824	symbol	H. sapiens	26824	H. sapiens	RNU11	RNA, U11 small nuclear	GO:0000395 mRNA 5'-splice site recognition;GO:0045292 mRNA cis splicing, via spliceosome;GO:0006376 mRNA splice site selection							0.0	0.0	0.0	0.0	0.0	0.0	0.0	0.0	0.0	0.0	0.0	0.0	0.0	0.0	0.0	0.0	0.0	0.0	0.0	0.0
RNU12	267010	symbol	H. sapiens	267010	H. sapiens	RNU12	RNA, U12 small nuclear								0.0	0.0	0.0	0.0	0.0	0.0	0.0	0.0	0.0	0.0	0.0	0.0	0.0	0.0	0.0	0.0	0.0	0.0	0.0	0.0
RNU6ATAC	100151684	symbol	H. sapiens	100151684	H. sapiens	RNU6ATAC	RNA, U6atac small nuclear (U12-dependent splicing)	GO:0000395 mRNA 5'-splice site recognition;GO:0000244 spliceosomal tri-snRNP complex assembly;GO:0045292 mRNA cis splicing, via spliceosome							0.0	0.0	0.0	0.0	0.0	0.0	0.0	0.0	0.0	0.0	0.0	0.0	0.0	0.0	0.0	0.0	0.0	0.0	0.0	0.0
RPL13AP20	387841	symbol	H. sapiens	387841	H. sapiens	RPL13AP20	ribosomal protein L13a pseudogene 20								0.0	0.0	0.0	0.0	0.0	0.0	0.0	0.0	0.0	0.0	0.0	0.0	0.0	0.0	0.0	0.0	0.0	0.0	0.0	0.0
RPL39	6170	symbol	H. sapiens	6170	H. sapiens	RPL39	ribosomal protein L39	GO:0002227 innate immune response in mucosa;GO:0002385 mucosal immune response;GO:0002251 organ or tissue specific immune response		Predicted intracellular proteins; Ribosomal proteins				(M5950)HALLMARK ALLOGRAFT REJECTION	1.0	0.0	0.0	0.0	0.0	0.0	0.0	0.0	0.0	0.0	0.0	0.0	0.0	0.0	0.0	0.0	0.0	0.0	0.0	0.0
RPL41	6171	symbol	H. sapiens	6171	H. sapiens	RPL41	ribosomal protein L41	GO:0002181 cytoplasmic translation;GO:0006412 translation;GO:0043043 peptide biosynthetic process		Predicted intracellular proteins; Ribosomal proteins	Endoplasmic reticulum (Supported)				1.0	0.0	0.0	0.0	0.0	0.0	0.0	0.0	0.0	0.0	0.0	0.0	0.0	0.0	0.0	0.0	0.0	0.0	0.0	0.0
RPP21	79897	symbol	H. sapiens	79897	H. sapiens	RPP21	ribonuclease P/MRP subunit p21	GO:0001682 tRNA 5'-leader removal;GO:0099116 tRNA 5'-end processing;GO:0034471 ncRNA 5'-end processing		Predicted intracellular proteins; ENZYME proteins:Hydrolases; Enzymes					0.0	0.0	0.0	0.0	0.0	0.0	0.0	0.0	0.0	0.0	0.0	0.0	0.0	0.0	0.0	0.0	0.0	0.0	0.0	0.0
RPPH1	85495	symbol	H. sapiens	85495	H. sapiens	RPPH1	ribonuclease P RNA component H1	GO:0090502 RNA phosphodiester bond hydrolysis, endonucleolytic;GO:0008033 tRNA processing;GO:0090501 RNA phosphodiester bond hydrolysis							0.0	0.0	0.0	0.0	0.0	0.0	0.0	0.0	0.0	0.0	0.0	0.0	0.0	0.0	0.0	0.0	0.0	0.0	0.0	0.0
RPS17	6218	symbol	H. sapiens	6218	H. sapiens	RPS17	ribosomal protein S17	GO:0042274 ribosomal small subunit biogenesis;GO:0006413 translational initiation;GO:0034101 erythrocyte homeostasis		Predicted intracellular proteins; Ribosomal proteins; Disease related genes	Cytosol;Endoplasmic reticulum (Approved); Additional: Nucleoli	Artenimol			1.0	0.0	0.0	0.0	0.0	0.0	0.0	0.0	0.0	0.0	0.0	0.0	0.0	0.0	0.0	0.0	0.0	0.0	0.0	0.0
RPS23	6228	symbol	H. sapiens	6228	H. sapiens	RPS23	ribosomal protein S23	GO:1990145 maintenance of translational fidelity;GO:0034063 stress granule assembly;GO:0002181 cytoplasmic translation		Predicted intracellular proteins; Ribosomal proteins; Disease related genes	Cytosol;Endoplasmic reticulum (Enhanced)				1.0	0.0	0.0	0.0	0.0	0.0	0.0	0.0	0.0	0.0	0.0	0.0	0.0	0.0	0.0	0.0	0.0	0.0	0.0	0.0
RTL1	388015	symbol	H. sapiens	388015	H. sapiens	RTL1	retrotransposon Gag like 1				Cytosol (Approved)				0.0	0.0	0.0	0.0	0.0	0.0	0.0	0.0	0.0	0.0	0.0	0.0	0.0	0.0	0.0	0.0	0.0	0.0	0.0	0.0
SARM1	23098	symbol	H. sapiens	23098	H. sapiens	SARM1	sterile alpha and TIR motif containing 1	GO:0034128 negative regulation of MyD88-independent toll-like receptor signaling pathway;GO:0034127 regulation of MyD88-independent toll-like receptor signaling pathway;GO:0019677 NAD catabolic process		Predicted intracellular proteins	Vesicles (Approved)				0.0	0.0	0.0	0.0	0.0	0.0	0.0	0.0	0.0	0.0	1.0	0.0	0.0	0.0	0.0	0.0	0.0	1.0	0.0	0.0
SCAP	22937	symbol	H. sapiens	22937	H. sapiens	SCAP	SREBF chaperone	GO:0045541 negative regulation of cholesterol biosynthetic process;GO:0090206 negative regulation of cholesterol metabolic process;GO:0106119 negative regulation of sterol biosynthetic process					(M7997)SA CASPASE CASCADE		0.0	0.0	0.0	0.0	0.0	0.0	0.0	0.0	0.0	0.0	0.0	0.0	0.0	0.0	0.0	0.0	0.0	0.0	0.0	0.0
SCARNA10	692148	symbol	H. sapiens	692148	H. sapiens	SCARNA10	small Cajal body-specific RNA 10	GO:0006396 RNA processing;GO:0016070 RNA metabolic process;GO:0090304 nucleic acid metabolic process							0.0	0.0	0.0	0.0	0.0	0.0	0.0	0.0	0.0	0.0	0.0	0.0	0.0	0.0	0.0	0.0	0.0	0.0	0.0	0.0
SCARNA12	677777	symbol	H. sapiens	677777	H. sapiens	SCARNA12	small Cajal body-specific RNA 12	GO:0006396 RNA processing;GO:0016070 RNA metabolic process;GO:0090304 nucleic acid metabolic process							0.0	0.0	0.0	0.0	0.0	0.0	0.0	0.0	0.0	0.0	0.0	0.0	0.0	0.0	0.0	0.0	0.0	0.0	0.0	0.0
SCARNA16	677781	symbol	H. sapiens	677781	H. sapiens	SCARNA16	small Cajal body-specific RNA 16	GO:0006396 RNA processing;GO:0016070 RNA metabolic process;GO:0090304 nucleic acid metabolic process							0.0	0.0	0.0	0.0	0.0	0.0	0.0	0.0	0.0	0.0	0.0	0.0	0.0	0.0	0.0	0.0	0.0	0.0	0.0	0.0
SCARNA17	677769	symbol	H. sapiens	677769	H. sapiens	SCARNA17	small Cajal body-specific RNA 17	GO:0006396 RNA processing;GO:0016070 RNA metabolic process;GO:0090304 nucleic acid metabolic process							0.0	0.0	0.0	0.0	0.0	0.0	0.0	0.0	0.0	0.0	0.0	0.0	0.0	0.0	0.0	0.0	0.0	0.0	0.0	0.0
SCARNA2	677766	symbol	H. sapiens	677766	H. sapiens	SCARNA2	small Cajal body-specific RNA 2	GO:0006396 RNA processing;GO:0016070 RNA metabolic process;GO:0090304 nucleic acid metabolic process							0.0	0.0	0.0	0.0	0.0	0.0	0.0	0.0	0.0	0.0	0.0	0.0	0.0	0.0	0.0	0.0	0.0	0.0	0.0	0.0
SCARNA22	677770	symbol	H. sapiens	677770	H. sapiens	SCARNA22	small Cajal body-specific RNA 22	GO:0006396 RNA processing;GO:0016070 RNA metabolic process;GO:0090304 nucleic acid metabolic process							0.0	0.0	0.0	0.0	0.0	0.0	0.0	0.0	0.0	0.0	0.0	0.0	0.0	0.0	0.0	0.0	0.0	0.0	0.0	0.0
SCARNA5	677775	symbol	H. sapiens	677775	H. sapiens	SCARNA5	small Cajal body-specific RNA 5	GO:0006396 RNA processing;GO:0016070 RNA metabolic process;GO:0090304 nucleic acid metabolic process							0.0	0.0	0.0	0.0	0.0	0.0	0.0	0.0	0.0	0.0	0.0	0.0	0.0	0.0	0.0	0.0	0.0	0.0	0.0	0.0
SCARNA6	677772	symbol	H. sapiens	677772	H. sapiens	SCARNA6	small Cajal body-specific RNA 6	GO:0006396 RNA processing;GO:0016070 RNA metabolic process;GO:0090304 nucleic acid metabolic process							0.0	0.0	0.0	0.0	0.0	0.0	0.0	0.0	0.0	0.0	0.0	0.0	0.0	0.0	0.0	0.0	0.0	0.0	0.0	0.0
SCARNA7	677767	symbol	H. sapiens	677767	H. sapiens	SCARNA7	small Cajal body-specific RNA 7	GO:0006396 RNA processing;GO:0016070 RNA metabolic process;GO:0090304 nucleic acid metabolic process							0.0	0.0	0.0	0.0	0.0	0.0	0.0	0.0	0.0	0.0	0.0	0.0	0.0	0.0	0.0	0.0	0.0	0.0	0.0	0.0
SCARNA9	619383	symbol	H. sapiens	619383	H. sapiens	SCARNA9	small Cajal body-specific RNA 9	GO:0006396 RNA processing;GO:0016070 RNA metabolic process;GO:0090304 nucleic acid metabolic process							0.0	0.0	0.0	0.0	0.0	0.0	0.0	0.0	0.0	0.0	0.0	0.0	0.0	0.0	0.0	0.0	0.0	0.0	0.0	0.0
SCD5	79966	symbol	H. sapiens	79966	H. sapiens	SCD5	stearoyl-CoA desaturase 5	GO:1903966 monounsaturated fatty acid biosynthetic process;GO:1903964 monounsaturated fatty acid metabolic process;GO:0006636 unsaturated fatty acid biosynthetic process		Enzymes; ENZYME proteins:Oxidoreductases					0.0	0.0	0.0	0.0	0.0	0.0	0.0	0.0	0.0	0.0	0.0	0.0	0.0	0.0	0.0	0.0	0.0	0.0	0.0	0.0
SCN5A	6331	symbol	H. sapiens	6331	H. sapiens	SCN5A	sodium voltage-gated channel alpha subunit 5	GO:0098912 membrane depolarization during atrial cardiac muscle cell action potential;GO:0086048 membrane depolarization during bundle of His cell action potential;GO:0086047 membrane depolarization during Purkinje myocyte cell action potential		Voltage-gated ion channels:Voltage-Gated Sodium Channels; Predicted intracellular proteins; FDA approved drug targets:Small molecule drugs; Disease related genes; Transporters:Transporter channels and pores	Plasma membrane (Supported); Additional: Nucleoli;Nucleoplasm	Indecainide; Phenytoin; Disopyramide; Lidocaine; Mexiletine; Hexylcaine; Cinchocaine; Mephenytoin; Moricizine; Riluzole; Prilocaine; Ethotoin; Benzonatate; Quinidine; Zonisamide; Procainamide; Tocainide; Propafenone; Flecainide; Encainide; Fosphenytoin; Quinidine barbiturate; Ajmaline; Aprindine; Dronedarone; Vernakalant; Isavuconazole			0.0	0.0	0.0	1.0	1.0	0.0	0.0	0.0	0.0	0.0	0.0	0.0	0.0	0.0	0.0	0.0	1.0	0.0	0.0	0.0
SCO2	9997	symbol	H. sapiens	9997	H. sapiens	SCO2	synthesis of cytochrome C oxidase 2	GO:0006878 cellular copper ion homeostasis;GO:0055070 copper ion homeostasis;GO:0033617 mitochondrial cytochrome c oxidase assembly		Predicted intracellular proteins	Mitochondria (Approved)				1.0	0.0	0.0	1.0	0.0	0.0	0.0	0.0	0.0	1.0	0.0	0.0	0.0	0.0	0.0	0.0	0.0	0.0	0.0	0.0
SCUBE3	222663	symbol	H. sapiens	222663	H. sapiens	SCUBE3	signal peptide, CUB domain and EGF like domain containing 3	GO:0007165 signal transduction;GO:0023052 signaling;GO:0007154 cell communication		Predicted secreted proteins	Plasma membrane (Approved)		(M5883)NABA SECRETED FACTORS; (M5885)NABA MATRISOME ASSOCIATED; (M5889)NABA MATRISOME		0.0	0.0	0.0	0.0	0.0	0.0	0.0	0.0	0.0	0.0	0.0	0.0	0.0	0.0	0.0	0.0	0.0	0.0	0.0	0.0
SH3BP1	23616	symbol	H. sapiens	23616	H. sapiens	SH3BP1	SH3 domain binding protein 1	GO:0045198 establishment of epithelial cell apical/basal polarity;GO:0035020 regulation of Rac protein signal transduction;GO:0035089 establishment of apical/basal cell polarity		Predicted intracellular proteins	Cytosol (Approved)				1.0	0.0	0.0	1.0	0.0	0.0	0.0	0.0	0.0	0.0	0.0	1.0	0.0	0.0	0.0	0.0	0.0	0.0	0.0	0.0
SH3RF3-AS1	100287216	symbol	H. sapiens	100287216	H. sapiens	SH3RF3-AS1	SH3RF3 antisense RNA 1								0.0	0.0	0.0	0.0	0.0	0.0	0.0	0.0	0.0	0.0	0.0	0.0	0.0	0.0	0.0	0.0	0.0	0.0	0.0	0.0
SHROOM2	357	symbol	H. sapiens	357	H. sapiens	SHROOM2	shroom family member 2	GO:0008057 eye pigment granule organization;GO:0043476 pigment accumulation;GO:0043482 cellular pigment accumulation		Predicted intracellular proteins	Cell Junctions;Plasma membrane (Approved); Additional: Cytosol			(M5916)HALLMARK APICAL SURFACE; (M5893)HALLMARK MITOTIC SPINDLE; (M5915)HALLMARK APICAL JUNCTION	0.0	0.0	0.0	0.0	1.0	0.0	0.0	0.0	0.0	1.0	0.0	0.0	0.0	0.0	0.0	0.0	0.0	0.0	0.0	0.0
SLC25A29	123096	symbol	H. sapiens	123096	H. sapiens	SLC25A29	solute carrier family 25 member 29	GO:1990575 mitochondrial L-ornithine transmembrane transport;GO:0006844 acyl carnitine transport;GO:1902616 acyl carnitine transmembrane transport		Predicted intracellular proteins; Transporters:Electrochemical Potential-driven transporters		Levocarnitine			0.0	0.0	0.0	0.0	0.0	0.0	0.0	0.0	0.0	0.0	0.0	0.0	0.0	0.0	0.0	0.0	0.0	0.0	0.0	0.0
SLC25A33	84275	symbol	H. sapiens	84275	H. sapiens	SLC25A33	solute carrier family 25 member 33	GO:0006864 pyrimidine nucleotide transport;GO:1990519 pyrimidine nucleotide import into mitochondrion;GO:0031930 mitochondria-nucleus signaling pathway		Transporters:Electrochemical Potential-driven transporters					0.0	0.0	0.0	0.0	0.0	0.0	0.0	0.0	0.0	0.0	0.0	0.0	0.0	1.0	0.0	0.0	0.0	0.0	0.0	0.0
SLC35F3	148641	symbol	H. sapiens	148641	H. sapiens	SLC35F3	solute carrier family 35 member F3	GO:0015888 thiamine transport;GO:0051180 vitamin transport;GO:0072348 sulfur compound transport		Transporters:Electrochemical Potential-driven transporters	Golgi apparatus (Approved); Additional: Nucleoli				0.0	0.0	0.0	0.0	0.0	0.0	0.0	0.0	0.0	0.0	0.0	0.0	0.0	0.0	0.0	0.0	0.0	0.0	0.0	0.0
SLC5A3	6526	symbol	H. sapiens	6526	H. sapiens	SLC5A3	solute carrier family 5 member 3	GO:1904679 myo-inositol import across plasma membrane;GO:0015750 pentose transmembrane transport;GO:0015756 fucose transmembrane transport		Transporters:Electrochemical Potential-driven transporters	Plasma membrane (Supported)				0.0	0.0	0.0	0.0	0.0	0.0	0.0	0.0	0.0	0.0	0.0	0.0	1.0	0.0	0.0	0.0	0.0	0.0	0.0	0.0
SLC7A11	23657	symbol	H. sapiens	23657	H. sapiens	SLC7A11	solute carrier family 7 member 11	GO:1901494 regulation of cysteine metabolic process;GO:1903786 regulation of glutathione biosynthetic process;GO:0031335 regulation of sulfur amino acid metabolic process		FDA approved drug targets:Small molecule drugs; Transporters:Electrochemical Potential-driven transporters	Vesicles (Approved)	Cystine; Glutamic acid; Riluzole; Sulfasalazine; Acetylcysteine; Thimerosal		(M5924)HALLMARK MTORC1 SIGNALING; (M5939)HALLMARK P53 PATHWAY; (M5945)HALLMARK HEME METABOLISM	0.0	0.0	1.0	0.0	1.0	0.0	0.0	0.0	0.0	1.0	0.0	1.0	1.0	0.0	0.0	0.0	0.0	1.0	0.0	1.0
SLC7A5P1	81893	symbol	H. sapiens	81893	H. sapiens	SLC7A5P1	solute carrier family 7 member 5 pseudogene 1	GO:1902475 L-alpha-amino acid transmembrane transport;GO:0015807 L-amino acid transport;GO:0003333 amino acid transmembrane transport							0.0	0.0	0.0	0.0	0.0	0.0	0.0	0.0	0.0	0.0	0.0	0.0	0.0	0.0	0.0	0.0	0.0	0.0	0.0	0.0
SLC7A5P2	387254	symbol	H. sapiens	387254	H. sapiens	SLC7A5P2	solute carrier family 7 member 5 pseudogene 2	GO:1902475 L-alpha-amino acid transmembrane transport;GO:0015807 L-amino acid transport;GO:0003333 amino acid transmembrane transport							0.0	0.0	0.0	0.0	0.0	0.0	0.0	0.0	0.0	0.0	0.0	0.0	0.0	0.0	0.0	0.0	0.0	0.0	0.0	0.0
SLITRK1	114798	symbol	H. sapiens	114798	H. sapiens	SLITRK1	SLIT and NTRK like family member 1	GO:0099560 synaptic membrane adhesion;GO:0099174 regulation of presynapse organization;GO:1905606 regulation of presynapse assembly		Predicted secreted proteins; Disease related genes					0.0	0.0	0.0	0.0	0.0	0.0	0.0	0.0	0.0	0.0	1.0	0.0	0.0	1.0	0.0	0.0	0.0	0.0	0.0	0.0
SMIM10L2B	644596	symbol	H. sapiens	644596	H. sapiens	SMIM10L2B	small integral membrane protein 10 like 2B								0.0	0.0	0.0	0.0	0.0	0.0	0.0	0.0	0.0	0.0	0.0	0.0	0.0	0.0	0.0	0.0	0.0	0.0	0.0	0.0
SMO	6608	symbol	H. sapiens	6608	H. sapiens	SMO	smoothened, frizzled class receptor	GO:0007371 ventral midline determination;GO:0072036 mesenchymal to epithelial transition involved in renal vesicle formation;GO:0072285 mesenchymal to epithelial transition involved in metanephric renal vesicle formation		Transporters; FDA approved drug targets:Small molecule drugs; Disease related genes; G-protein coupled receptors:GPCRs excl olfactory receptors; Cancer-related genes; G-protein coupled receptors:Family fz/smo receptors		Fluocinonide; Halcinonide; Vismodegib; Sonidegib; Glasdegib	(M211)PID HEDGEHOG 2PATHWAY; (M219)PID HEDGEHOG GLI PATHWAY		1.0	0.0	0.0	1.0	1.0	0.0	1.0	0.0	0.0	0.0	1.0	1.0	1.0	1.0	1.0	0.0	1.0	0.0	1.0	0.0
SNHG16	100507246	symbol	H. sapiens	100507246	H. sapiens	SNHG16	small nucleolar RNA host gene 16								0.0	0.0	0.0	0.0	0.0	0.0	0.0	0.0	0.0	0.0	0.0	0.0	0.0	0.0	0.0	0.0	0.0	0.0	0.0	0.0
SNHG24	79104	gene_synonym	H. sapiens	79104	H. sapiens	MEG8	maternally expressed 8, small nucleolar RNA host gene								0.0	0.0	0.0	0.0	0.0	0.0	0.0	0.0	0.0	0.0	0.0	0.0	0.0	0.0	0.0	0.0	0.0	0.0	0.0	0.0
SNHG8	100093630	symbol	H. sapiens	100093630	H. sapiens	SNHG8	small nucleolar RNA host gene 8								0.0	0.0	0.0	0.0	0.0	0.0	0.0	0.0	0.0	0.0	0.0	0.0	0.0	0.0	0.0	0.0	0.0	0.0	0.0	0.0
SNORA10	574042	symbol	H. sapiens	574042	H. sapiens	SNORA10	small nucleolar RNA, H/ACA box 10	GO:0006396 RNA processing;GO:0016070 RNA metabolic process;GO:0090304 nucleic acid metabolic process							0.0	0.0	0.0	0.0	0.0	0.0	0.0	0.0	0.0	0.0	0.0	0.0	0.0	0.0	0.0	0.0	0.0	0.0	0.0	0.0
SNORA12	677800	symbol	H. sapiens	677800	H. sapiens	SNORA12	small nucleolar RNA, H/ACA box 12	GO:0006396 RNA processing;GO:0016070 RNA metabolic process;GO:0090304 nucleic acid metabolic process							0.0	0.0	0.0	0.0	0.0	0.0	0.0	0.0	0.0	0.0	0.0	0.0	0.0	0.0	0.0	0.0	0.0	0.0	0.0	0.0
SNORA16A	692073	symbol	H. sapiens	692073	H. sapiens	SNORA16A	small nucleolar RNA, H/ACA box 16A	GO:0006396 RNA processing;GO:0016070 RNA metabolic process;GO:0090304 nucleic acid metabolic process							0.0	0.0	0.0	0.0	0.0	0.0	0.0	0.0	0.0	0.0	0.0	0.0	0.0	0.0	0.0	0.0	0.0	0.0	0.0	0.0
SNORA21	619505	symbol	H. sapiens	619505	H. sapiens	SNORA21	small nucleolar RNA, H/ACA box 21	GO:0006396 RNA processing;GO:0016070 RNA metabolic process;GO:0090304 nucleic acid metabolic process							0.0	0.0	0.0	0.0	0.0	0.0	0.0	0.0	0.0	0.0	0.0	0.0	0.0	0.0	0.0	0.0	0.0	0.0	0.0	0.0
SNORA22	677807	symbol	H. sapiens	677807	H. sapiens	SNORA22	small nucleolar RNA, H/ACA box 22	GO:0006396 RNA processing;GO:0016070 RNA metabolic process;GO:0090304 nucleic acid metabolic process							0.0	0.0	0.0	0.0	0.0	0.0	0.0	0.0	0.0	0.0	0.0	0.0	0.0	0.0	0.0	0.0	0.0	0.0	0.0	0.0
SNORA23	677808	symbol	H. sapiens	677808	H. sapiens	SNORA23	small nucleolar RNA, H/ACA box 23	GO:0006396 RNA processing;GO:0016070 RNA metabolic process;GO:0090304 nucleic acid metabolic process							0.0	0.0	0.0	0.0	0.0	0.0	0.0	0.0	0.0	0.0	0.0	0.0	0.0	0.0	0.0	0.0	0.0	0.0	0.0	0.0
SNORA24	677809	symbol	H. sapiens	677809	H. sapiens	SNORA24	small nucleolar RNA, H/ACA box 24	GO:0006396 RNA processing;GO:0016070 RNA metabolic process;GO:0090304 nucleic acid metabolic process							0.0	0.0	0.0	0.0	0.0	0.0	0.0	0.0	0.0	0.0	0.0	0.0	0.0	0.0	0.0	0.0	0.0	0.0	0.0	0.0
SNORA34	677815	gene_synonym	H. sapiens	677815	H. sapiens	SNORA2C	small nucleolar RNA, H/ACA box 2C	GO:0006396 RNA processing;GO:0016070 RNA metabolic process;GO:0090304 nucleic acid metabolic process							0.0	0.0	0.0	0.0	0.0	0.0	0.0	0.0	0.0	0.0	0.0	0.0	0.0	0.0	0.0	0.0	0.0	0.0	0.0	0.0
SNORA38	677820	symbol	H. sapiens	677820	H. sapiens	SNORA38	small nucleolar RNA, H/ACA box 38	GO:0006396 RNA processing;GO:0016070 RNA metabolic process;GO:0090304 nucleic acid metabolic process							0.0	0.0	0.0	0.0	0.0	0.0	0.0	0.0	0.0	0.0	0.0	0.0	0.0	0.0	0.0	0.0	0.0	0.0	0.0	0.0
SNORA40	677822	symbol	H. sapiens	677822	H. sapiens	SNORA40	small nucleolar RNA, H/ACA box 40	GO:0006396 RNA processing;GO:0016070 RNA metabolic process;GO:0090304 nucleic acid metabolic process							0.0	0.0	0.0	0.0	0.0	0.0	0.0	0.0	0.0	0.0	0.0	0.0	0.0	0.0	0.0	0.0	0.0	0.0	0.0	0.0
SNORA44	677825	symbol	H. sapiens	677825	H. sapiens	SNORA44	small nucleolar RNA, H/ACA box 44	GO:0006396 RNA processing;GO:0016070 RNA metabolic process;GO:0090304 nucleic acid metabolic process							0.0	0.0	0.0	0.0	0.0	0.0	0.0	0.0	0.0	0.0	0.0	0.0	0.0	0.0	0.0	0.0	0.0	0.0	0.0	0.0
SNORA45A	619562	gene_synonym	H. sapiens	619562	H. sapiens	SNORA3A	small nucleolar RNA, H/ACA box 3A	GO:0006396 RNA processing;GO:0016070 RNA metabolic process;GO:0090304 nucleic acid metabolic process							0.0	0.0	0.0	0.0	0.0	0.0	0.0	0.0	0.0	0.0	0.0	0.0	0.0	0.0	0.0	0.0	0.0	0.0	0.0	0.0
SNORA48	652965	symbol	H. sapiens	652965	H. sapiens	SNORA48	small nucleolar RNA, H/ACA box 48	GO:0006396 RNA processing;GO:0016070 RNA metabolic process;GO:0090304 nucleic acid metabolic process							0.0	0.0	0.0	0.0	0.0	0.0	0.0	0.0	0.0	0.0	0.0	0.0	0.0	0.0	0.0	0.0	0.0	0.0	0.0	0.0
SNORA49	677829	symbol	H. sapiens	677829	H. sapiens	SNORA49	small nucleolar RNA, H/ACA box 49	GO:0006396 RNA processing;GO:0016070 RNA metabolic process;GO:0090304 nucleic acid metabolic process							0.0	0.0	0.0	0.0	0.0	0.0	0.0	0.0	0.0	0.0	0.0	0.0	0.0	0.0	0.0	0.0	0.0	0.0	0.0	0.0
SNORA52	619565	symbol	H. sapiens	619565	H. sapiens	SNORA52	small nucleolar RNA, H/ACA box 52	GO:0006396 RNA processing;GO:0016070 RNA metabolic process;GO:0090304 nucleic acid metabolic process							0.0	0.0	0.0	0.0	0.0	0.0	0.0	0.0	0.0	0.0	0.0	0.0	0.0	0.0	0.0	0.0	0.0	0.0	0.0	0.0
SNORA53	677832	symbol	H. sapiens	677832	H. sapiens	SNORA53	small nucleolar RNA, H/ACA box 53	GO:0006396 RNA processing;GO:0016070 RNA metabolic process;GO:0090304 nucleic acid metabolic process							0.0	0.0	0.0	0.0	0.0	0.0	0.0	0.0	0.0	0.0	0.0	0.0	0.0	0.0	0.0	0.0	0.0	0.0	0.0	0.0
SNORA57	692158	symbol	H. sapiens	692158	H. sapiens	SNORA57	small nucleolar RNA, H/ACA box 57	GO:0006396 RNA processing;GO:0016070 RNA metabolic process;GO:0090304 nucleic acid metabolic process							0.0	0.0	0.0	0.0	0.0	0.0	0.0	0.0	0.0	0.0	0.0	0.0	0.0	0.0	0.0	0.0	0.0	0.0	0.0	0.0
SNORA63	6043	symbol	H. sapiens	6043	H. sapiens	SNORA63	small nucleolar RNA, H/ACA box 63	GO:0006396 RNA processing;GO:0016070 RNA metabolic process;GO:0090304 nucleic acid metabolic process							0.0	0.0	0.0	0.0	0.0	0.0	0.0	0.0	0.0	0.0	0.0	0.0	0.0	0.0	0.0	0.0	0.0	0.0	0.0	0.0
SNORA64	26784	symbol	H. sapiens	26784	H. sapiens	SNORA64	small nucleolar RNA, H/ACA box 64	GO:0006396 RNA processing;GO:0016070 RNA metabolic process;GO:0090304 nucleic acid metabolic process							0.0	0.0	0.0	0.0	0.0	0.0	0.0	0.0	0.0	0.0	0.0	0.0	0.0	0.0	0.0	0.0	0.0	0.0	0.0	0.0
SNORA67	26781	symbol	H. sapiens	26781	H. sapiens	SNORA67	small nucleolar RNA, H/ACA box 67	GO:0006396 RNA processing;GO:0016070 RNA metabolic process;GO:0090304 nucleic acid metabolic process							0.0	0.0	0.0	0.0	0.0	0.0	0.0	0.0	0.0	0.0	0.0	0.0	0.0	0.0	0.0	0.0	0.0	0.0	0.0	0.0
SNORA68	26780	symbol	H. sapiens	26780	H. sapiens	SNORA68	small nucleolar RNA, H/ACA box 68	GO:0006396 RNA processing;GO:0016070 RNA metabolic process;GO:0090304 nucleic acid metabolic process							0.0	0.0	0.0	0.0	0.0	0.0	0.0	0.0	0.0	0.0	0.0	0.0	0.0	0.0	0.0	0.0	0.0	0.0	0.0	0.0
SNORA70	26778	symbol	H. sapiens	26778	H. sapiens	SNORA70	small nucleolar RNA, H/ACA box 70	GO:0006396 RNA processing;GO:0016070 RNA metabolic process;GO:0090304 nucleic acid metabolic process							0.0	0.0	0.0	0.0	0.0	0.0	0.0	0.0	0.0	0.0	0.0	0.0	0.0	0.0	0.0	0.0	0.0	0.0	0.0	0.0
SNORA71A	26777	symbol	H. sapiens	26777	H. sapiens	SNORA71A	small nucleolar RNA, H/ACA box 71A	GO:0006396 RNA processing;GO:0016070 RNA metabolic process;GO:0090304 nucleic acid metabolic process							0.0	0.0	0.0	0.0	0.0	0.0	0.0	0.0	0.0	0.0	0.0	0.0	0.0	0.0	0.0	0.0	0.0	0.0	0.0	0.0
SNORA71B	26776	symbol	H. sapiens	26776	H. sapiens	SNORA71B	small nucleolar RNA, H/ACA box 71B	GO:0006396 RNA processing;GO:0016070 RNA metabolic process;GO:0090304 nucleic acid metabolic process							0.0	0.0	0.0	0.0	0.0	0.0	0.0	0.0	0.0	0.0	0.0	0.0	0.0	0.0	0.0	0.0	0.0	0.0	0.0	0.0
SNORA71C	677839	symbol	H. sapiens	677839	H. sapiens	SNORA71C	small nucleolar RNA, H/ACA box 71C	GO:0006396 RNA processing;GO:0016070 RNA metabolic process;GO:0090304 nucleic acid metabolic process							0.0	0.0	0.0	0.0	0.0	0.0	0.0	0.0	0.0	0.0	0.0	0.0	0.0	0.0	0.0	0.0	0.0	0.0	0.0	0.0
SNORA71D	677840	symbol	H. sapiens	677840	H. sapiens	SNORA71D	small nucleolar RNA, H/ACA box 71D	GO:0006396 RNA processing;GO:0016070 RNA metabolic process;GO:0090304 nucleic acid metabolic process							0.0	0.0	0.0	0.0	0.0	0.0	0.0	0.0	0.0	0.0	0.0	0.0	0.0	0.0	0.0	0.0	0.0	0.0	0.0	0.0
SNORA73B	26768	symbol	H. sapiens	26768	H. sapiens	SNORA73B	small nucleolar RNA, H/ACA box 73B	GO:0006396 RNA processing;GO:0016070 RNA metabolic process;GO:0090304 nucleic acid metabolic process							0.0	0.0	0.0	0.0	0.0	0.0	0.0	0.0	0.0	0.0	0.0	0.0	0.0	0.0	0.0	0.0	0.0	0.0	0.0	0.0
SNORA76C	677842	gene_synonym	H. sapiens	677842	H. sapiens	SNORA50C	small nucleolar RNA, H/ACA box 50C	GO:0006396 RNA processing;GO:0016070 RNA metabolic process;GO:0090304 nucleic acid metabolic process							0.0	0.0	0.0	0.0	0.0	0.0	0.0	0.0	0.0	0.0	0.0	0.0	0.0	0.0	0.0	0.0	0.0	0.0	0.0	0.0
SNORA7B	677797	symbol	H. sapiens	677797	H. sapiens	SNORA7B	small nucleolar RNA, H/ACA box 7B	GO:0006396 RNA processing;GO:0016070 RNA metabolic process;GO:0090304 nucleic acid metabolic process							0.0	0.0	0.0	0.0	0.0	0.0	0.0	0.0	0.0	0.0	0.0	0.0	0.0	0.0	0.0	0.0	0.0	0.0	0.0	0.0
SNORA8	654320	symbol	H. sapiens	654320	H. sapiens	SNORA8	small nucleolar RNA, H/ACA box 8	GO:0006396 RNA processing;GO:0016070 RNA metabolic process;GO:0090304 nucleic acid metabolic process							0.0	0.0	0.0	0.0	0.0	0.0	0.0	0.0	0.0	0.0	0.0	0.0	0.0	0.0	0.0	0.0	0.0	0.0	0.0	0.0
SNORA80A	677846	symbol	H. sapiens	677846	H. sapiens	SNORA80A	small nucleolar RNA, H/ACA box 80A	GO:0006396 RNA processing;GO:0016070 RNA metabolic process;GO:0090304 nucleic acid metabolic process							0.0	0.0	0.0	0.0	0.0	0.0	0.0	0.0	0.0	0.0	0.0	0.0	0.0	0.0	0.0	0.0	0.0	0.0	0.0	0.0
SNORA84	100124534	symbol	H. sapiens	100124534	H. sapiens	SNORA84	small nucleolar RNA, H/ACA box 84	GO:0006396 RNA processing;GO:0016070 RNA metabolic process;GO:0090304 nucleic acid metabolic process							0.0	0.0	0.0	0.0	0.0	0.0	0.0	0.0	0.0	0.0	0.0	0.0	0.0	0.0	0.0	0.0	0.0	0.0	0.0	0.0
SNORD10	652966	symbol	H. sapiens	652966	H. sapiens	SNORD10	small nucleolar RNA, C/D box 10	GO:0006396 RNA processing;GO:0016070 RNA metabolic process;GO:0090304 nucleic acid metabolic process							0.0	0.0	0.0	0.0	0.0	0.0	0.0	0.0	0.0	0.0	0.0	0.0	0.0	0.0	0.0	0.0	0.0	0.0	0.0	0.0
SNORD15B	114599	symbol	H. sapiens	114599	H. sapiens	SNORD15B	small nucleolar RNA, C/D box 15B	GO:0006396 RNA processing;GO:0016070 RNA metabolic process;GO:0090304 nucleic acid metabolic process							0.0	0.0	0.0	0.0	0.0	0.0	0.0	0.0	0.0	0.0	0.0	0.0	0.0	0.0	0.0	0.0	0.0	0.0	0.0	0.0
SNORD17	692086	symbol	H. sapiens	692086	H. sapiens	SNORD17	small nucleolar RNA, C/D box 17	GO:0006396 RNA processing;GO:0016070 RNA metabolic process;GO:0090304 nucleic acid metabolic process							0.0	0.0	0.0	0.0	0.0	0.0	0.0	0.0	0.0	0.0	0.0	0.0	0.0	0.0	0.0	0.0	0.0	0.0	0.0	0.0
SNORD32A	26819	symbol	H. sapiens	26819	H. sapiens	SNORD32A	small nucleolar RNA, C/D box 32A	GO:0006396 RNA processing;GO:0016070 RNA metabolic process;GO:0090304 nucleic acid metabolic process							0.0	0.0	0.0	0.0	0.0	0.0	0.0	0.0	0.0	0.0	0.0	0.0	0.0	0.0	0.0	0.0	0.0	0.0	0.0	0.0
SNORD33	26818	symbol	H. sapiens	26818	H. sapiens	SNORD33	small nucleolar RNA, C/D box 33	GO:0006396 RNA processing;GO:0016070 RNA metabolic process;GO:0090304 nucleic acid metabolic process							0.0	0.0	0.0	0.0	0.0	0.0	0.0	0.0	0.0	0.0	0.0	0.0	0.0	0.0	0.0	0.0	0.0	0.0	0.0	0.0
SNORD46	94161	symbol	H. sapiens	94161	H. sapiens	SNORD46	small nucleolar RNA, C/D box 46	GO:0006396 RNA processing;GO:0016070 RNA metabolic process;GO:0090304 nucleic acid metabolic process							0.0	0.0	0.0	0.0	0.0	0.0	0.0	0.0	0.0	0.0	0.0	0.0	0.0	0.0	0.0	0.0	0.0	0.0	0.0	0.0
SNORD94	692225	symbol	H. sapiens	692225	H. sapiens	SNORD94	small nucleolar RNA, C/D box 94	GO:0006396 RNA processing;GO:0016070 RNA metabolic process;GO:0090304 nucleic acid metabolic process							0.0	0.0	0.0	0.0	0.0	0.0	0.0	0.0	0.0	0.0	0.0	0.0	0.0	0.0	0.0	0.0	0.0	0.0	0.0	0.0
SNORD97	692223	symbol	H. sapiens	692223	H. sapiens	SNORD97	small nucleolar RNA, C/D box 97	GO:0006396 RNA processing;GO:0016070 RNA metabolic process;GO:0090304 nucleic acid metabolic process							0.0	0.0	0.0	0.0	0.0	0.0	0.0	0.0	0.0	0.0	0.0	0.0	0.0	0.0	0.0	0.0	0.0	0.0	0.0	0.0
SNTB2	6645	symbol	H. sapiens	6645	H. sapiens	SNTB2	syntrophin beta 2			Predicted intracellular proteins	Golgi apparatus;Plasma membrane (Supported); Additional: Nucleoplasm				0.0	0.0	0.0	0.0	0.0	0.0	0.0	0.0	0.0	0.0	0.0	0.0	0.0	0.0	0.0	0.0	0.0	0.0	0.0	0.0
SNX27	81609	symbol	H. sapiens	81609	H. sapiens	SNX27	sorting nexin 27	GO:0001770 establishment of natural killer cell polarity;GO:0001767 establishment of lymphocyte polarity;GO:0008333 endosome to lysosome transport		Predicted intracellular proteins; Transporters	Cytosol;Nucleoplasm (Approved)				0.0	0.0	0.0	0.0	0.0	0.0	0.0	0.0	0.0	0.0	0.0	0.0	0.0	0.0	0.0	0.0	0.0	0.0	0.0	0.0
SOCS3	9021	symbol	H. sapiens	9021	H. sapiens	SOCS3	suppressor of cytokine signaling 3	GO:0060670 branching involved in labyrinthine layer morphogenesis;GO:0060707 trophoblast giant cell differentiation;GO:0042532 negative regulation of tyrosine phosphorylation of STAT protein		Predicted intracellular proteins; Disease related genes	Cytosol (Approved); Additional: Plasma membrane		(M233)PID EPO PATHWAY; (M196)PID IL23 PATHWAY; (M183)PID IL6 7 PATHWAY	(M5897)HALLMARK IL6 JAK STAT3 SIGNALING; (M5890)HALLMARK TNFA SIGNALING VIA NFKB; (M5913)HALLMARK INTERFERON GAMMA RESPONSE	1.0	0.0	1.0	1.0	0.0	0.0	0.0	0.0	0.0	0.0	0.0	0.0	0.0	1.0	0.0	0.0	0.0	0.0	0.0	0.0
SOX11	6664	symbol	H. sapiens	6664	H. sapiens	SOX11	SRY-box transcription factor 11	GO:0097166 lens epithelial cell proliferation;GO:2001109 regulation of lens epithelial cell proliferation;GO:2001111 positive regulation of lens epithelial cell proliferation		Predicted intracellular proteins; Transcription factors:Other all-alpha-helical DNA-binding domains; Disease related genes	Nucleoplasm (Supported); Additional: Plasma membrane				1.0	0.0	0.0	1.0	0.0	0.0	0.0	0.0	0.0	1.0	0.0	1.0	0.0	0.0	0.0	0.0	1.0	0.0	0.0	1.0
SOX2	6657	symbol	H. sapiens	6657	H. sapiens	SOX2	SRY-box transcription factor 2	GO:0001714 endodermal cell fate specification;GO:0021781 glial cell fate commitment;GO:0021984 adenohypophysis development		Predicted intracellular proteins; Disease related genes; Transcription factors:Other all-alpha-helical DNA-binding domains; Cancer-related genes	Nucleoplasm (Enhanced)				1.0	0.0	1.0	1.0	1.0	0.0	1.0	0.0	0.0	1.0	0.0	0.0	0.0	1.0	0.0	0.0	1.0	0.0	1.0	1.0
SOX6	55553	symbol	H. sapiens	55553	H. sapiens	SOX6	SRY-box transcription factor 6	GO:2000741 positive regulation of mesenchymal stem cell differentiation;GO:0021529 spinal cord oligodendrocyte cell differentiation;GO:2000739 regulation of mesenchymal stem cell differentiation		Predicted intracellular proteins; Transcription factors:Other all-alpha-helical DNA-binding domains	Nucleoplasm (Supported)				1.0	0.0	0.0	1.0	1.0	0.0	0.0	0.0	0.0	0.0	0.0	0.0	0.0	0.0	0.0	0.0	0.0	0.0	1.0	1.0
SPINT1	6692	symbol	H. sapiens	6692	H. sapiens	SPINT1	serine peptidase inhibitor, Kunitz type 1	GO:0060670 branching involved in labyrinthine layer morphogenesis;GO:2000178 negative regulation of neural precursor cell proliferation;GO:0060713 labyrinthine layer morphogenesis		Cancer-related genes:Candidate cancer biomarkers; Predicted intracellular proteins; Predicted secreted proteins	Cytosol;Plasma membrane (Supported); Additional: Nucleoplasm				0.0	0.0	1.0	1.0	0.0	0.0	0.0	0.0	0.0	0.0	0.0	0.0	0.0	0.0	1.0	0.0	0.0	0.0	0.0	1.0
SPINT2	10653	symbol	H. sapiens	10653	H. sapiens	SPINT2	serine peptidase inhibitor, Kunitz type 2	GO:0060671 epithelial cell differentiation involved in embryonic placenta development;GO:0060672 epithelial cell morphogenesis involved in placental branching;GO:0060670 branching involved in labyrinthine layer morphogenesis		Cancer-related genes:Candidate cancer biomarkers; Predicted intracellular proteins; Disease related genes	Cytosol;Intermediate filaments;Plasma membrane (Uncertain)			(M5934)HALLMARK XENOBIOTIC METABOLISM	0.0	0.0	0.0	1.0	0.0	0.0	0.0	0.0	0.0	0.0	1.0	1.0	0.0	0.0	1.0	0.0	0.0	0.0	0.0	1.0
SPSB4	92369	symbol	H. sapiens	92369	H. sapiens	SPSB4	splA/ryanodine receptor domain and SOCS box containing 4	GO:1902916 positive regulation of protein polyubiquitination;GO:1902914 regulation of protein polyubiquitination;GO:0031398 positive regulation of protein ubiquitination		Predicted intracellular proteins	Golgi apparatus;Nucleoplasm (Approved)				0.0	0.0	0.0	0.0	0.0	0.0	0.0	0.0	0.0	0.0	0.0	0.0	0.0	0.0	0.0	0.0	0.0	0.0	0.0	0.0
ST3GAL5	8869	symbol	H. sapiens	8869	H. sapiens	ST3GAL5	ST3 beta-galactoside alpha-2,3-sialyltransferase 5	GO:0001574 ganglioside biosynthetic process;GO:0097503 sialylation;GO:0001573 ganglioside metabolic process		ENZYME proteins:Transferases; Predicted intracellular proteins; Enzymes; Disease related genes; Potential drug targets	Vesicles (Approved)	99mTc-14 F7 Mab		(M5913)HALLMARK INTERFERON GAMMA RESPONSE	0.0	0.0	0.0	0.0	0.0	0.0	0.0	0.0	0.0	0.0	0.0	0.0	0.0	0.0	0.0	0.0	0.0	0.0	0.0	0.0
ST6GAL2	84620	symbol	H. sapiens	84620	H. sapiens	ST6GAL2	ST6 beta-galactoside alpha-2,6-sialyltransferase 2	GO:0097503 sialylation;GO:0009311 oligosaccharide metabolic process;GO:0006486 protein glycosylation		ENZYME proteins:Transferases; Predicted intracellular proteins; Enzymes	Nucleoli fibrillar center (Approved); Additional: Nucleoplasm				0.0	0.0	0.0	0.0	0.0	0.0	0.0	0.0	0.0	0.0	0.0	0.0	0.0	0.0	0.0	0.0	0.0	0.0	0.0	0.0
STAG3L3	442578	symbol	H. sapiens	442578	H. sapiens	STAG3L3	stromal antigen 3-like 3 (pseudogene)	GO:0007062 sister chromatid cohesion;GO:0000819 sister chromatid segregation;GO:0098813 nuclear chromosome segregation							0.0	0.0	0.0	0.0	0.0	0.0	0.0	0.0	0.0	0.0	0.0	0.0	0.0	0.0	0.0	0.0	0.0	0.0	0.0	0.0
STARD13	90627	symbol	H. sapiens	90627	H. sapiens	STARD13	StAR related lipid transfer domain containing 13	GO:0097498 endothelial tube lumen extension;GO:0003159 morphogenesis of an endothelium;GO:0061154 endothelial tube morphogenesis		Predicted intracellular proteins					1.0	0.0	0.0	1.0	0.0	0.0	0.0	0.0	0.0	0.0	0.0	0.0	0.0	0.0	0.0	0.0	0.0	0.0	0.0	0.0
STX6	10228	symbol	H. sapiens	10228	H. sapiens	STX6	syntaxin 6	GO:0016189 synaptic vesicle to endosome fusion;GO:0099532 synaptic vesicle endosomal processing;GO:0090161 Golgi ribbon formation		Transporters:Transporter channels and pores	Golgi apparatus (Enhanced); Additional: Nucleoplasm				0.0	0.0	0.0	0.0	0.0	0.0	0.0	0.0	0.0	0.0	0.0	0.0	1.0	0.0	0.0	0.0	0.0	0.0	0.0	0.0
SUSD5	26032	symbol	H. sapiens	26032	H. sapiens	SUSD5	sushi domain containing 5	GO:0007219 Notch signaling pathway;GO:0007155 cell adhesion;GO:0022610 biological adhesion		Predicted intracellular proteins	Golgi apparatus;Vesicles (Uncertain)				0.0	0.0	0.0	0.0	0.0	0.0	0.0	0.0	0.0	0.0	0.0	0.0	0.0	0.0	0.0	0.0	0.0	0.0	0.0	0.0
SYDE2	84144	symbol	H. sapiens	84144	H. sapiens	SYDE2	synapse defective Rho GTPase homolog 2	GO:0090630 activation of GTPase activity;GO:0043547 positive regulation of GTPase activity;GO:0051056 regulation of small GTPase mediated signal transduction		Predicted intracellular proteins	Golgi apparatus;Nucleoli;Nucleoli rim (Approved)				1.0	0.0	0.0	0.0	0.0	0.0	0.0	0.0	0.0	0.0	0.0	0.0	0.0	0.0	0.0	0.0	0.0	0.0	0.0	0.0
SYNE2	23224	symbol	H. sapiens	23224	H. sapiens	SYNE2	spectrin repeat containing nuclear envelope protein 2	GO:0031022 nuclear migration along microfilament;GO:0007097 nuclear migration;GO:0099515 actin filament-based transport		Predicted intracellular proteins; Disease related genes	Intermediate filaments;Nuclear membrane (Approved)				1.0	0.0	0.0	0.0	0.0	0.0	0.0	0.0	0.0	0.0	0.0	0.0	0.0	0.0	0.0	0.0	0.0	0.0	0.0	0.0
SYNE3	161176	symbol	H. sapiens	161176	H. sapiens	SYNE3	spectrin repeat containing nuclear envelope family member 3	GO:0007097 nuclear migration;GO:0051647 nucleus localization;GO:0008360 regulation of cell shape		Predicted intracellular proteins	Nuclear membrane (Supported)				0.0	0.0	0.0	0.0	0.0	0.0	0.0	0.0	0.0	0.0	0.0	0.0	0.0	0.0	0.0	0.0	0.0	0.0	0.0	0.0
TAX1BP3	30851	symbol	H. sapiens	30851	H. sapiens	TAX1BP3	Tax1 binding protein 3	GO:2000009 negative regulation of protein localization to cell surface;GO:2000008 regulation of protein localization to cell surface;GO:0034394 protein localization to cell surface		Predicted intracellular proteins	Actin filaments;Nucleoli fibrillar center (Approved); Additional: Vesicles			(M5939)HALLMARK P53 PATHWAY	1.0	0.0	0.0	0.0	0.0	0.0	1.0	0.0	0.0	0.0	0.0	0.0	1.0	0.0	0.0	0.0	0.0	0.0	0.0	0.0
TBX2	6909	symbol	H. sapiens	6909	H. sapiens	TBX2	T-box transcription factor 2	GO:1901208 negative regulation of heart looping;GO:1901210 regulation of cardiac chamber formation;GO:1901211 negative regulation of cardiac chamber formation		Predicted intracellular proteins; Transcription factors:Immunoglobulin fold	Nucleoplasm (Approved); Additional: Cytosol				0.0	0.0	0.0	1.0	0.0	0.0	0.0	0.0	0.0	1.0	0.0	0.0	0.0	1.0	0.0	0.0	0.0	0.0	1.0	1.0
TBX2-AS1	103689912	symbol	H. sapiens	103689912	H. sapiens	TBX2-AS1	TBX2 antisense RNA 1								0.0	0.0	0.0	0.0	0.0	0.0	0.0	0.0	0.0	0.0	0.0	0.0	0.0	0.0	0.0	0.0	0.0	0.0	0.0	0.0
TCAF1	9747	symbol	H. sapiens	9747	H. sapiens	TCAF1	TRPM8 channel associated factor 1	GO:1901529 positive regulation of anion channel activity;GO:0010359 regulation of anion channel activity;GO:1903961 positive regulation of anion transmembrane transport		Predicted intracellular proteins					0.0	0.0	0.0	0.0	0.0	0.0	0.0	0.0	0.0	0.0	0.0	0.0	1.0	0.0	0.0	0.0	0.0	0.0	0.0	0.0
TERC	7012	symbol	H. sapiens	7012	H. sapiens	TERC	telomerase RNA component	GO:2000773 negative regulation of cellular senescence;GO:0090344 negative regulation of cell aging;GO:2000772 regulation of cellular senescence							1.0	0.0	0.0	0.0	0.0	0.0	0.0	0.0	0.0	0.0	0.0	0.0	0.0	0.0	0.0	0.0	0.0	0.0	0.0	0.0
TET1	80312	symbol	H. sapiens	80312	H. sapiens	TET1	tet methylcytosine dioxygenase 1	GO:0090310 negative regulation of DNA methylation-dependent heterochromatin assembly;GO:0006211 5-methylcytosine catabolic process;GO:0019857 5-methylcytosine metabolic process		Transcription factors:Zinc-coordinating DNA-binding domains; Predicted intracellular proteins; Enzymes; Disease related genes; ENZYME proteins:Oxidoreductases; Cancer-related genes; Potential drug targets	Nucleoplasm (Supported); Additional: Nuclear membrane				1.0	1.0	0.0	1.0	0.0	0.0	0.0	1.0	0.0	0.0	0.0	0.0	0.0	0.0	0.0	0.0	0.0	0.0	0.0	0.0
TGFB2	7042	symbol	H. sapiens	7042	H. sapiens	TGFB2	transforming growth factor beta 2	GO:1903701 substantia propria of cornea development;GO:0042704 uterine wall breakdown;GO:0051795 positive regulation of timing of catagen		Cancer-related genes:Candidate cancer biomarkers; Predicted secreted proteins; Disease related genes			(M11736)SA MMP CYTOKINE CONNECTION; (M211)PID HEDGEHOG 2PATHWAY; (M33)PID GLYPICAN 1PATHWAY	(M5902)HALLMARK APOPTOSIS; (M5934)HALLMARK XENOBIOTIC METABOLISM; (M5950)HALLMARK ALLOGRAFT REJECTION	1.0	0.0	1.0	1.0	0.0	0.0	1.0	0.0	0.0	1.0	0.0	1.0	0.0	1.0	0.0	0.0	1.0	1.0	0.0	1.0
THEM6	51337	symbol	H. sapiens	51337	H. sapiens	THEM6	thioesterase superfamily member 6			Predicted intracellular proteins; Predicted secreted proteins	Cytosol;Nuclear speckles (Approved)				0.0	0.0	0.0	0.0	0.0	0.0	0.0	0.0	0.0	0.0	0.0	0.0	0.0	0.0	0.0	0.0	0.0	0.0	0.0	0.0
TIMM17B	10245	symbol	H. sapiens	10245	H. sapiens	TIMM17B	translocase of inner mitochondrial membrane 17B	GO:0030150 protein import into mitochondrial matrix;GO:0044743 protein transmembrane import into intracellular organelle;GO:0065002 intracellular protein transmembrane transport		Predicted intracellular proteins	Microtubules (Approved); Additional: Mitochondria				0.0	0.0	0.0	0.0	0.0	0.0	0.0	0.0	0.0	0.0	0.0	0.0	0.0	0.0	0.0	0.0	0.0	0.0	0.0	0.0
TMEM120B	144404	symbol	H. sapiens	144404	H. sapiens	TMEM120B	transmembrane protein 120B	GO:0051291 protein heterooligomerization;GO:0045444 fat cell differentiation;GO:0051259 protein complex oligomerization		Predicted intracellular proteins	Nucleoli fibrillar center (Approved); Additional: Cytosol				0.0	0.0	0.0	0.0	0.0	0.0	0.0	0.0	0.0	0.0	0.0	0.0	0.0	0.0	0.0	0.0	0.0	0.0	0.0	0.0
TMEM130	222865	symbol	H. sapiens	222865	H. sapiens	TMEM130	transmembrane protein 130			Predicted intracellular proteins	Golgi apparatus (Supported)				0.0	0.0	0.0	0.0	0.0	0.0	0.0	0.0	0.0	0.0	0.0	0.0	0.0	0.0	0.0	0.0	0.0	0.0	0.0	0.0
TMEM160	54958	symbol	H. sapiens	54958	H. sapiens	TMEM160	transmembrane protein 160								0.0	0.0	0.0	0.0	0.0	0.0	0.0	0.0	0.0	0.0	0.0	0.0	0.0	0.0	0.0	0.0	0.0	0.0	0.0	0.0
TMEM184A	202915	symbol	H. sapiens	202915	H. sapiens	TMEM184A	transmembrane protein 184A	GO:0006810 transport;GO:0051234 establishment of localization;GO:0051179 localization			Nucleoplasm (Uncertain)				0.0	0.0	0.0	0.0	0.0	0.0	0.0	0.0	0.0	0.0	0.0	0.0	0.0	0.0	0.0	0.0	0.0	0.0	0.0	0.0
TMEM2	23670	gene_synonym	H. sapiens	23670	H. sapiens	CEMIP2	cell migration inducing hyaluronidase 2	GO:0030214 hyaluronan catabolic process;GO:0006027 glycosaminoglycan catabolic process;GO:0030212 hyaluronan metabolic process		Predicted intracellular proteins; ENZYME proteins:Hydrolases; Enzymes	Plasma membrane (Supported); Additional: Vesicles				0.0	0.0	0.0	0.0	0.0	0.0	0.0	0.0	0.0	0.0	0.0	0.0	0.0	0.0	0.0	0.0	0.0	0.0	0.0	0.0
TMEM35	59353	gene_synonym	H. sapiens	59353	H. sapiens	TMEM35A	transmembrane protein 35A	GO:2000010 positive regulation of protein localization to cell surface;GO:0051131 chaperone-mediated protein complex assembly;GO:2000008 regulation of protein localization to cell surface			Vesicles (Supported); Additional: Cytosol;Focal adhesion sites				0.0	0.0	0.0	0.0	0.0	0.0	0.0	0.0	0.0	0.0	0.0	0.0	1.0	0.0	0.0	0.0	0.0	0.0	0.0	0.0
TMPPE	643853	symbol	H. sapiens	643853	H. sapiens	TMPPE	transmembrane protein with metallophosphoesterase domain			Predicted intracellular proteins	Mitochondria;Nucleoplasm (Approved)				0.0	0.0	0.0	0.0	0.0	0.0	0.0	0.0	0.0	0.0	0.0	0.0	0.0	0.0	0.0	0.0	0.0	0.0	0.0	0.0
TNNC1	7134	symbol	H. sapiens	7134	H. sapiens	TNNC1	troponin C1, slow skeletal and cardiac type	GO:0002086 diaphragm contraction;GO:0032972 regulation of muscle filament sliding speed;GO:0003011 involuntary skeletal muscle contraction		Predicted intracellular proteins; FDA approved drug targets:Small molecule drugs; Disease related genes	Actin filaments;Mitochondria;Nucleoplasm (Approved)	Trifluoperazine; Levosimendan; Felodipine; Bepridil; Calcium; Aluminium monostearate; 5-[1-(3,4-Dimethoxy-Benzoyl)-1,2,3,4-Tetrahydro-Quinolin-6-Yl]-6-Methyl-3,6-Dihydro-[1,3,4]Thiadiazin-2-One; N-(6-Aminohexyl)-5-Chloro-1-Naphthalenesulfonamide		(M5907)HALLMARK ESTROGEN RESPONSE LATE; (M5909)HALLMARK MYOGENESIS	0.0	0.0	0.0	1.0	0.0	0.0	0.0	0.0	0.0	0.0	0.0	0.0	1.0	0.0	0.0	0.0	0.0	0.0	0.0	0.0
TOX	9760	symbol	H. sapiens	9760	H. sapiens	TOX	thymocyte selection associated high mobility group box	GO:0002364 NK T cell lineage commitment;GO:0043375 CD8-positive, alpha-beta T cell lineage commitment;GO:0002362 CD4-positive, CD25-positive, alpha-beta regulatory T cell lineage commitment		Predicted intracellular proteins; Transcription factors:Other all-alpha-helical DNA-binding domains	Nucleoli fibrillar center;Nucleoplasm (Approved)				1.0	0.0	0.0	0.0	1.0	0.0	0.0	0.0	0.0	0.0	1.0	0.0	0.0	0.0	1.0	0.0	0.0	0.0	1.0	0.0
TP53	7157	symbol	H. sapiens	7157	H. sapiens	TP53	tumor protein p53	GO:1905856 negative regulation of pentose-phosphate shunt;GO:1990248 regulation of transcription from RNA polymerase II promoter in response to DNA damage;GO:0072717 cellular response to actinomycin D		Cancer-related genes:Candidate cancer biomarkers; Transcription factors:Immunoglobulin fold; Cancer-related genes:Mutated cancer genes; Predicted intracellular proteins; Disease related genes; Transporters:Transporter channels and pores; Cancer-related genes:Mutational cancer driver genes; Potential drug targets	Nucleoplasm (Enhanced)	Acetylsalicylic acid; Zinc; Triethyl phosphate; AZD 3355; 1-(9-ethyl-9H-carbazol-3-yl)-N-methylmethanamine; Zinc acetate; Zinc chloride; Zinc sulfate, unspecified form	(M1529)SA G1 AND S PHASES; (M180)PID HIF1A PATHWAY; (M32)PID HDAC CLASSIII PATHWAY	(M5895)HALLMARK WNT BETA CATENIN SIGNALING; (M5898)HALLMARK DNA REPAIR; (M5925)HALLMARK E2F TARGETS	1.0	1.0	1.0	1.0	1.0	0.0	1.0	1.0	1.0	0.0	0.0	0.0	0.0	1.0	1.0	1.0	0.0	1.0	1.0	1.0
TRAF4	9618	symbol	H. sapiens	9618	H. sapiens	TRAF4	TNF receptor associated factor 4	GO:0007250 activation of NF-kappaB-inducing kinase activity;GO:0007585 respiratory gaseous exchange by respiratory system;GO:0046330 positive regulation of JNK cascade		Cancer-related genes:Candidate cancer biomarkers; Predicted intracellular proteins	Nucleoli fibrillar center (Supported); Additional: Cytosol;Nucleoplasm		(M256)PID TAP63 PATHWAY	(M5939)HALLMARK P53 PATHWAY	0.0	0.0	0.0	0.0	0.0	0.0	1.0	0.0	1.0	0.0	0.0	0.0	0.0	0.0	0.0	0.0	0.0	0.0	0.0	0.0
TRAPPC2	6399	symbol	H. sapiens	6399	H. sapiens	TRAPPC2	trafficking protein particle complex subunit 2	GO:0006888 endoplasmic reticulum to Golgi vesicle-mediated transport;GO:0048193 Golgi vesicle transport;GO:0001501 skeletal system development		Predicted intracellular proteins; Disease related genes	Endoplasmic reticulum;Vesicles (Approved); Additional: Nucleoplasm				0.0	0.0	0.0	1.0	0.0	0.0	0.0	0.0	0.0	0.0	0.0	0.0	0.0	0.0	0.0	0.0	0.0	0.0	0.0	0.0
TRIM16	10626	symbol	H. sapiens	10626	H. sapiens	TRIM16	tripartite motif containing 16	GO:0048386 positive regulation of retinoic acid receptor signaling pathway;GO:0048385 regulation of retinoic acid receptor signaling pathway;GO:0045618 positive regulation of keratinocyte differentiation		Predicted intracellular proteins	Cytosol (Supported); Additional: Plasma membrane				0.0	0.0	0.0	0.0	0.0	0.0	0.0	0.0	0.0	0.0	0.0	1.0	0.0	0.0	0.0	0.0	0.0	0.0	0.0	0.0
TRIM67	440730	symbol	H. sapiens	440730	H. sapiens	TRIM67	tripartite motif containing 67	GO:0046580 negative regulation of Ras protein signal transduction;GO:0051058 negative regulation of small GTPase mediated signal transduction;GO:2000060 positive regulation of ubiquitin-dependent protein catabolic process		Predicted intracellular proteins					0.0	0.0	0.0	0.0	0.0	0.0	0.0	0.0	0.0	0.0	1.0	0.0	1.0	0.0	0.0	0.0	0.0	0.0	0.0	0.0
TSPAN14	81619	symbol	H. sapiens	81619	H. sapiens	TSPAN14	tetraspanin 14	GO:0045747 positive regulation of Notch signaling pathway;GO:0008593 regulation of Notch signaling pathway;GO:0007219 Notch signaling pathway		Transporters:Accessory Factors Involved in Transport	Vesicles (Supported)				1.0	0.0	0.0	0.0	0.0	0.0	0.0	0.0	0.0	0.0	0.0	0.0	0.0	0.0	0.0	0.0	0.0	0.0	0.0	0.0
TSPAN7	7102	symbol	H. sapiens	7102	H. sapiens	TSPAN7	tetraspanin 7			Disease related genes; Potential drug targets; CD markers; Transporters:Accessory Factors Involved in Transport				(M5953)HALLMARK KRAS SIGNALING UP	0.0	0.0	1.0	0.0	0.0	0.0	0.0	0.0	0.0	0.0	0.0	0.0	0.0	0.0	0.0	0.0	0.0	0.0	0.0	0.0
TSPAN9	10867	symbol	H. sapiens	10867	H. sapiens	TSPAN9	tetraspanin 9	GO:0008150 biological_process			Golgi apparatus;Nucleoplasm (Approved); Additional: Cytosol				0.0	0.0	0.0	0.0	0.0	0.0	0.0	0.0	0.0	0.0	0.0	0.0	0.0	0.0	0.0	0.0	0.0	0.0	0.0	0.0
TSPEAR-AS1	54082	symbol	H. sapiens	54082	H. sapiens	TSPEAR-AS1	TSPEAR antisense RNA 1								0.0	0.0	0.0	0.0	0.0	0.0	0.0	0.0	0.0	0.0	0.0	0.0	0.0	0.0	0.0	0.0	0.0	0.0	0.0	0.0
TTC5	91875	symbol	H. sapiens	91875	H. sapiens	TTC5	tetratricopeptide repeat domain 5	GO:0006281 DNA repair;GO:0006974 cellular response to DNA damage stimulus;GO:0006259 DNA metabolic process		Predicted intracellular proteins	Nucleoplasm (Supported)		(M261)PID P53 REGULATION PATHWAY		0.0	0.0	0.0	0.0	0.0	0.0	0.0	0.0	0.0	0.0	0.0	0.0	0.0	0.0	0.0	0.0	0.0	0.0	0.0	0.0
TUBB2B	347733	symbol	H. sapiens	347733	H. sapiens	TUBB2B	tubulin beta 2B class IIb	GO:1902669 positive regulation of axon guidance;GO:1902667 regulation of axon guidance;GO:1990403 embryonic brain development		Predicted intracellular proteins; Disease related genes	Microtubules (Supported); Additional: Cytokinetic bridge;Mitotic spindle	CYT997; 2-MERCAPTO-N-[1,2,3,10-TETRAMETHOXY-9-OXO-5,6,7,9-TETRAHYDRO-BENZO[A]HEPTALEN-7-YL]ACETAMIDE		(M5906)HALLMARK ESTROGEN RESPONSE EARLY	1.0	0.0	1.0	1.0	0.0	0.0	0.0	0.0	0.0	0.0	1.0	0.0	0.0	0.0	0.0	0.0	0.0	0.0	0.0	0.0
TULP4	56995	symbol	H. sapiens	56995	H. sapiens	TULP4	TUB like protein 4	GO:0016567 protein ubiquitination;GO:0032446 protein modification by small protein conjugation;GO:0070647 protein modification by small protein conjugation or removal		Predicted intracellular proteins					0.0	0.0	0.0	0.0	0.0	0.0	0.0	0.0	0.0	0.0	0.0	0.0	0.0	0.0	0.0	0.0	0.0	0.0	0.0	0.0
TXNDC5	81567	symbol	H. sapiens	81567	H. sapiens	TXNDC5	thioredoxin domain containing 5	GO:0043277 apoptotic cell clearance;GO:0006909 phagocytosis;GO:0043066 negative regulation of apoptotic process		Predicted intracellular proteins	Endoplasmic reticulum (Approved)				0.0	0.0	0.0	0.0	0.0	0.0	0.0	0.0	0.0	0.0	0.0	0.0	0.0	0.0	0.0	0.0	0.0	0.0	0.0	0.0
UBASH3B	84959	symbol	H. sapiens	84959	H. sapiens	UBASH3B	ubiquitin associated and SH3 domain containing B	GO:0090331 negative regulation of platelet aggregation;GO:0038063 collagen-activated tyrosine kinase receptor signaling pathway;GO:0034111 negative regulation of homotypic cell-cell adhesion		Predicted intracellular proteins; ENZYME proteins:Hydrolases; Enzymes	Plasma membrane (Approved)				1.0	0.0	0.0	0.0	0.0	0.0	0.0	0.0	0.0	0.0	0.0	0.0	0.0	0.0	0.0	0.0	0.0	0.0	0.0	0.0
UBE2V1	7335	symbol	H. sapiens	7335	H. sapiens	UBE2V1	ubiquitin conjugating enzyme E2 V1	GO:0006301 postreplication repair;GO:0070534 protein K63-linked ubiquitination;GO:0006282 regulation of DNA repair		Predicted intracellular proteins	Nucleoplasm (Enhanced)		(M110)PID IL1 PATHWAY		0.0	0.0	1.0	0.0	0.0	0.0	0.0	0.0	0.0	0.0	0.0	0.0	0.0	0.0	0.0	0.0	0.0	0.0	0.0	0.0
UBL4B	164153	symbol	H. sapiens	164153	H. sapiens	UBL4B	ubiquitin like 4B	GO:1903955 positive regulation of protein targeting to mitochondrion;GO:1903749 positive regulation of establishment of protein localization to mitochondrion;GO:1903214 regulation of protein targeting to mitochondrion		Predicted intracellular proteins					0.0	0.0	0.0	0.0	0.0	0.0	0.0	0.0	0.0	0.0	0.0	0.0	1.0	0.0	0.0	0.0	0.0	0.0	0.0	0.0
UBTD1	80019	symbol	H. sapiens	80019	H. sapiens	UBTD1	ubiquitin domain containing 1			Predicted intracellular proteins	Vesicles (Approved); Additional: Cytosol;Plasma membrane				0.0	0.0	0.0	0.0	0.0	0.0	0.0	0.0	0.0	0.0	0.0	0.0	0.0	0.0	0.0	0.0	0.0	0.0	0.0	0.0
UGCG	7357	symbol	H. sapiens	7357	H. sapiens	UGCG	UDP-glucose ceramide glucosyltransferase	GO:0006679 glucosylceramide biosynthetic process;GO:1903575 cornified envelope assembly;GO:0006678 glucosylceramide metabolic process		ENZYME proteins:Transferases; FDA approved drug targets:Small molecule drugs; Transporters; Enzymes		Miglustat; Eliglustat	(M143)PID IL2 PI3K PATHWAY	(M5906)HALLMARK ESTROGEN RESPONSE EARLY	0.0	0.0	0.0	0.0	0.0	0.0	0.0	0.0	0.0	0.0	0.0	1.0	0.0	0.0	0.0	0.0	0.0	0.0	0.0	0.0
VSTM2A	222008	symbol	H. sapiens	222008	H. sapiens	VSTM2A	V-set and transmembrane domain containing 2A	GO:0070352 positive regulation of white fat cell proliferation;GO:0070343 white fat cell proliferation;GO:0070350 regulation of white fat cell proliferation		Predicted secreted proteins					0.0	0.0	0.0	0.0	0.0	0.0	0.0	0.0	0.0	0.0	0.0	0.0	0.0	0.0	0.0	0.0	0.0	0.0	0.0	1.0
WBP1	23559	symbol	H. sapiens	23559	H. sapiens	WBP1	WW domain binding protein 1	GO:0008150 biological_process			Cytosol (Approved)				0.0	0.0	0.0	0.0	0.0	0.0	0.0	0.0	0.0	0.0	0.0	0.0	0.0	0.0	0.0	0.0	0.0	0.0	0.0	0.0
WNK3	65267	symbol	H. sapiens	65267	H. sapiens	WNK3	WNK lysine deficient protein kinase 3	GO:0007231 osmosensory signaling pathway;GO:1903288 positive regulation of potassium ion import across plasma membrane;GO:1903286 regulation of potassium ion import	Other	ENZYME proteins:Transferases; Predicted intracellular proteins; Kinases; Enzymes	Vesicles (Approved)				0.0	0.0	0.0	0.0	0.0	0.0	0.0	0.0	0.0	0.0	0.0	0.0	1.0	0.0	0.0	0.0	0.0	0.0	0.0	0.0
WNT2B	7482	symbol	H. sapiens	7482	H. sapiens	WNT2B	Wnt family member 2B	GO:0060423 foregut regionalization;GO:0060424 lung field specification;GO:0060492 lung induction		Predicted intracellular proteins; Predicted secreted proteins	Vesicles (Approved); Additional: Nucleoplasm		(M5493)WNT SIGNALING; (M5883)NABA SECRETED FACTORS; (M5885)NABA MATRISOME ASSOCIATED		1.0	0.0	0.0	1.0	1.0	0.0	1.0	0.0	0.0	1.0	0.0	0.0	0.0	0.0	0.0	0.0	0.0	0.0	1.0	0.0
WNT5A	7474	symbol	H. sapiens	7474	H. sapiens	WNT5A	Wnt family member 5A	GO:0036517 chemoattraction of serotonergic neuron axon;GO:0048850 hypophysis morphogenesis;GO:0061341 non-canonical Wnt signaling pathway involved in heart development		Predicted secreted proteins; Disease related genes			(M77)PID WNT SIGNALING PATHWAY; (M23)PID WNT NONCANONICAL PATHWAY; (M254)PID MYC REPRESS PATHWAY	(M5903)HALLMARK NOTCH SIGNALING; (M5930)HALLMARK EPITHELIAL MESENCHYMAL TRANSITION	1.0	0.0	0.0	1.0	1.0	0.0	1.0	0.0	0.0	1.0	1.0	1.0	1.0	1.0	1.0	0.0	1.0	1.0	1.0	1.0
XKR5	389610	symbol	H. sapiens	389610	H. sapiens	XKR5	XK related 5	GO:0070782 phosphatidylserine exposure on apoptotic cell surface;GO:0043652 engulfment of apoptotic cell;GO:0017121 plasma membrane phospholipid scrambling							0.0	0.0	0.0	1.0	0.0	0.0	0.0	0.0	0.0	0.0	0.0	0.0	0.0	0.0	0.0	0.0	0.0	0.0	0.0	0.0
XKR6	286046	symbol	H. sapiens	286046	H. sapiens	XKR6	XK related 6	GO:0070782 phosphatidylserine exposure on apoptotic cell surface;GO:0043652 engulfment of apoptotic cell;GO:0017121 plasma membrane phospholipid scrambling			Actin filaments (Approved)				0.0	0.0	0.0	1.0	0.0	0.0	0.0	0.0	0.0	0.0	0.0	0.0	0.0	0.0	0.0	0.0	0.0	0.0	0.0	0.0
ZBED9	114821	symbol	H. sapiens	114821	H. sapiens	ZBED9	zinc finger BED-type containing 9	GO:0015074 DNA integration;GO:0050679 positive regulation of epithelial cell proliferation;GO:0045787 positive regulation of cell cycle		Predicted intracellular proteins	Nucleoli (Approved); Additional: Golgi apparatus;Nucleoplasm				0.0	0.0	0.0	0.0	0.0	0.0	0.0	0.0	0.0	0.0	0.0	0.0	0.0	0.0	0.0	0.0	1.0	0.0	0.0	0.0
ZBTB46	140685	symbol	H. sapiens	140685	H. sapiens	ZBTB46	zinc finger and BTB domain containing 46	GO:2001200 positive regulation of dendritic cell differentiation;GO:2001199 negative regulation of dendritic cell differentiation;GO:0045650 negative regulation of macrophage differentiation		Transcription factors:Zinc-coordinating DNA-binding domains; Predicted intracellular proteins	Nucleoplasm (Approved)				1.0	0.0	0.0	0.0	0.0	0.0	0.0	0.0	0.0	0.0	0.0	0.0	0.0	0.0	0.0	0.0	0.0	0.0	0.0	0.0
ZC3H7B	23264	symbol	H. sapiens	23264	H. sapiens	ZC3H7B	zinc finger CCCH-type containing 7B	GO:0035196 production of miRNAs involved in gene silencing by miRNA;GO:0031050 dsRNA processing;GO:0070918 production of small RNA involved in gene silencing by RNA		Predicted intracellular proteins	Cytosol (Uncertain)				0.0	1.0	0.0	0.0	0.0	0.0	0.0	0.0	0.0	0.0	0.0	0.0	0.0	0.0	0.0	0.0	0.0	0.0	0.0	0.0
ZDHHC8P1	150244	symbol	H. sapiens	150244	H. sapiens	ZDHHC8P1	ZDHHC8 pseudogene 1								0.0	0.0	0.0	0.0	0.0	0.0	0.0	0.0	0.0	0.0	0.0	0.0	0.0	0.0	0.0	0.0	0.0	0.0	0.0	0.0
ZFHX3	463	symbol	H. sapiens	463	H. sapiens	ZFHX3	zinc finger homeobox 3	GO:1904059 regulation of locomotor rhythm;GO:0045475 locomotor rhythm;GO:0048512 circadian behavior		Cancer-related genes:Mutated cancer genes; Cancer-related genes:Mutational cancer driver genes; Predicted intracellular proteins; Transcription factors:Helix-turn-helix domains	Nucleoplasm (Supported)		(M195)PID CMYB PATHWAY		0.0	0.0	0.0	1.0	1.0	0.0	1.0	0.0	0.0	0.0	0.0	0.0	0.0	0.0	0.0	0.0	0.0	0.0	0.0	1.0
ZFX	7543	symbol	H. sapiens	7543	H. sapiens	ZFX	zinc finger protein X-linked	GO:0060746 parental behavior;GO:0019098 reproductive behavior;GO:0048599 oocyte development		Transcription factors:Zinc-coordinating DNA-binding domains; Predicted intracellular proteins	Nucleoplasm (Approved); Additional: Nucleoli				0.0	0.0	0.0	0.0	0.0	0.0	0.0	0.0	0.0	0.0	0.0	0.0	0.0	1.0	0.0	0.0	0.0	0.0	0.0	0.0
ZKSCAN2	342357	symbol	H. sapiens	342357	H. sapiens	ZKSCAN2	zinc finger with KRAB and SCAN domains 2	GO:0006357 regulation of transcription by RNA polymerase II;GO:0006366 transcription by RNA polymerase II;GO:0006355 regulation of transcription, DNA-templated		Transcription factors:Zinc-coordinating DNA-binding domains; Predicted intracellular proteins	Nucleoplasm (Approved); Additional: Golgi apparatus;Nucleoli fibrillar center				0.0	0.0	0.0	0.0	0.0	0.0	0.0	0.0	0.0	0.0	0.0	0.0	0.0	0.0	0.0	0.0	0.0	0.0	0.0	0.0
ZNF106	64397	symbol	H. sapiens	64397	H. sapiens	ZNF106	zinc finger protein 106	GO:0008286 insulin receptor signaling pathway;GO:0032869 cellular response to insulin stimulus;GO:0032868 response to insulin		Predicted intracellular proteins	Nucleoli (Approved); Additional: Cytosol;Nucleoplasm				0.0	0.0	0.0	0.0	0.0	0.0	0.0	0.0	0.0	0.0	0.0	0.0	0.0	0.0	0.0	0.0	0.0	0.0	0.0	0.0
ZNF121	7675	symbol	H. sapiens	7675	H. sapiens	ZNF121	zinc finger protein 121	GO:0006357 regulation of transcription by RNA polymerase II;GO:0006366 transcription by RNA polymerase II;GO:0006355 regulation of transcription, DNA-templated		Transcription factors:Zinc-coordinating DNA-binding domains; Predicted intracellular proteins	Centrosome;Nucleoplasm (Approved); Additional: Nucleoli				0.0	0.0	0.0	0.0	0.0	0.0	0.0	0.0	0.0	0.0	0.0	0.0	0.0	0.0	0.0	0.0	0.0	0.0	0.0	0.0
ZNF346	23567	symbol	H. sapiens	23567	H. sapiens	ZNF346	zinc finger protein 346			Predicted intracellular proteins	Nucleoplasm (Approved)				0.0	0.0	0.0	0.0	0.0	0.0	0.0	0.0	0.0	0.0	0.0	0.0	0.0	0.0	0.0	0.0	0.0	0.0	0.0	0.0
ZNF365	22891	symbol	H. sapiens	22891	H. sapiens	ZNF365	zinc finger protein 365	GO:0110026 regulation of DNA strand resection involved in replication fork processing;GO:0021679 cerebellar molecular layer development;GO:0021687 cerebellar molecular layer morphogenesis		Predicted intracellular proteins; Disease related genes	Centriolar satellite;Vesicles (Supported)			(M5939)HALLMARK P53 PATHWAY	1.0	0.0	0.0	0.0	1.0	0.0	0.0	0.0	0.0	0.0	1.0	0.0	0.0	0.0	0.0	0.0	0.0	0.0	0.0	0.0
ZNF460	10794	symbol	H. sapiens	10794	H. sapiens	ZNF460	zinc finger protein 460	GO:0006357 regulation of transcription by RNA polymerase II;GO:0006366 transcription by RNA polymerase II;GO:0006355 regulation of transcription, DNA-templated		Transcription factors:Zinc-coordinating DNA-binding domains; Predicted intracellular proteins	Nucleoplasm (Approved)				0.0	0.0	0.0	0.0	0.0	0.0	0.0	0.0	0.0	0.0	0.0	0.0	0.0	0.0	0.0	0.0	0.0	0.0	0.0	0.0
ZNF518B	85460	symbol	H. sapiens	85460	H. sapiens	ZNF518B	zinc finger protein 518B	GO:0006325 chromatin organization;GO:0051276 chromosome organization;GO:0006357 regulation of transcription by RNA polymerase II		Transcription factors:Zinc-coordinating DNA-binding domains; Predicted intracellular proteins	Nucleoplasm (Approved)				0.0	0.0	0.0	0.0	0.0	0.0	0.0	0.0	0.0	0.0	0.0	0.0	0.0	0.0	0.0	0.0	0.0	0.0	0.0	0.0
ZNF579	163033	symbol	H. sapiens	163033	H. sapiens	ZNF579	zinc finger protein 579			Transcription factors:Zinc-coordinating DNA-binding domains; Predicted intracellular proteins	Nucleoplasm (Approved)				0.0	0.0	0.0	0.0	0.0	0.0	0.0	0.0	0.0	0.0	0.0	0.0	0.0	0.0	0.0	0.0	0.0	0.0	0.0	0.0
ZNF620	253639	symbol	H. sapiens	253639	H. sapiens	ZNF620	zinc finger protein 620	GO:0000122 negative regulation of transcription by RNA polymerase II;GO:0045892 negative regulation of transcription, DNA-templated;GO:1903507 negative regulation of nucleic acid-templated transcription		Cancer-related genes:Mutated cancer genes; Transcription factors:Zinc-coordinating DNA-binding domains; Predicted intracellular proteins	Centrosome (Approved)				0.0	0.0	0.0	0.0	0.0	0.0	0.0	0.0	0.0	0.0	0.0	0.0	0.0	0.0	0.0	0.0	0.0	0.0	0.0	0.0
ZNF70	7621	symbol	H. sapiens	7621	H. sapiens	ZNF70	zinc finger protein 70	GO:0006357 regulation of transcription by RNA polymerase II;GO:0006366 transcription by RNA polymerase II;GO:0006355 regulation of transcription, DNA-templated		Transcription factors:Zinc-coordinating DNA-binding domains; Predicted intracellular proteins	Cytosol (Approved)				0.0	0.0	0.0	0.0	0.0	0.0	0.0	0.0	0.0	0.0	0.0	0.0	0.0	0.0	0.0	0.0	0.0	0.0	0.0	0.0
ZNF74	7625	symbol	H. sapiens	7625	H. sapiens	ZNF74	zinc finger protein 74	GO:0006357 regulation of transcription by RNA polymerase II;GO:0006366 transcription by RNA polymerase II;GO:0006355 regulation of transcription, DNA-templated		Transcription factors:Zinc-coordinating DNA-binding domains; Predicted intracellular proteins	Nucleoplasm (Supported); Additional: Actin filaments				1.0	0.0	0.0	0.0	0.0	0.0	0.0	0.0	0.0	0.0	0.0	0.0	0.0	0.0	0.0	0.0	0.0	0.0	0.0	0.0
ZNF771	51333	symbol	H. sapiens	51333	H. sapiens	ZNF771	zinc finger protein 771	GO:0006357 regulation of transcription by RNA polymerase II;GO:0006366 transcription by RNA polymerase II;GO:0006355 regulation of transcription, DNA-templated		Transcription factors:Zinc-coordinating DNA-binding domains; Predicted intracellular proteins	Nucleoli;Nucleoplasm (Enhanced)				0.0	0.0	0.0	0.0	0.0	0.0	0.0	0.0	0.0	0.0	0.0	0.0	0.0	0.0	0.0	0.0	0.0	0.0	0.0	0.0
ZNF804A	91752	symbol	H. sapiens	91752	H. sapiens	ZNF804A	zinc finger protein 804A	GO:1902952 positive regulation of dendritic spine maintenance;GO:1902950 regulation of dendritic spine maintenance;GO:0097062 dendritic spine maintenance		Predicted intracellular proteins	Endoplasmic reticulum (Approved)				0.0	0.0	0.0	0.0	0.0	0.0	0.0	0.0	0.0	0.0	1.0	0.0	0.0	0.0	0.0	0.0	0.0	0.0	0.0	0.0
ZNF805	390980	symbol	H. sapiens	390980	H. sapiens	ZNF805	zinc finger protein 805	GO:0006357 regulation of transcription by RNA polymerase II;GO:0006366 transcription by RNA polymerase II;GO:0006355 regulation of transcription, DNA-templated		Transcription factors:Zinc-coordinating DNA-binding domains; Predicted intracellular proteins	Nucleoplasm (Approved)				0.0	0.0	0.0	0.0	0.0	0.0	0.0	0.0	0.0	0.0	0.0	0.0	0.0	0.0	0.0	0.0	0.0	0.0	0.0	0.0
ZNF808	388558	symbol	H. sapiens	388558	H. sapiens	ZNF808	zinc finger protein 808	GO:0045944 positive regulation of transcription by RNA polymerase II;GO:0045893 positive regulation of transcription, DNA-templated;GO:1903508 positive regulation of nucleic acid-templated transcription		Transcription factors:Zinc-coordinating DNA-binding domains; Predicted intracellular proteins					0.0	0.0	0.0	0.0	0.0	0.0	0.0	0.0	0.0	0.0	0.0	0.0	0.0	0.0	0.0	0.0	0.0	0.0	0.0	0.0
ZNF850	342892	symbol	H. sapiens	342892	H. sapiens	ZNF850	zinc finger protein 850	GO:0045944 positive regulation of transcription by RNA polymerase II;GO:0045893 positive regulation of transcription, DNA-templated;GO:1903508 positive regulation of nucleic acid-templated transcription		Predicted intracellular proteins	Nucleoplasm (Approved)				0.0	0.0	0.0	0.0	0.0	0.0	0.0	0.0	0.0	0.0	0.0	0.0	0.0	0.0	0.0	0.0	0.0	0.0	0.0	0.0
ZNF853	54753	symbol	H. sapiens	54753	H. sapiens	ZNF853	zinc finger protein 853	GO:0006357 regulation of transcription by RNA polymerase II;GO:0006366 transcription by RNA polymerase II;GO:0006355 regulation of transcription, DNA-templated		Transcription factors:Zinc-coordinating DNA-binding domains; Predicted intracellular proteins	Nucleoli (Approved)				0.0	0.0	0.0	0.0	0.0	0.0	0.0	0.0	0.0	0.0	0.0	0.0	0.0	0.0	0.0	0.0	0.0	0.0	0.0	0.0
ZNRF1	84937	symbol	H. sapiens	84937	H. sapiens	ZNRF1	zinc and ring finger 1	GO:0070936 protein K48-linked ubiquitination;GO:0000209 protein polyubiquitination;GO:0043161 proteasome-mediated ubiquitin-dependent protein catabolic process		ENZYME proteins:Transferases; Predicted intracellular proteins; Enzymes					0.0	0.0	0.0	0.0	0.0	0.0	0.0	0.0	0.0	0.0	0.0	0.0	0.0	0.0	0.0	0.0	0.0	0.0	0.0	0.0
ZNRF2P1	441208	symbol	H. sapiens	441208	H. sapiens	ZNRF2P1	zinc and ring finger 2 pseudogene 1								0.0	0.0	0.0	0.0	0.0	0.0	0.0	0.0	0.0	0.0	0.0	0.0	0.0	0.0	0.0	0.0	0.0	0.0	0.0	0.0
ZSCAN18	65982	symbol	H. sapiens	65982	H. sapiens	ZSCAN18	zinc finger and SCAN domain containing 18	GO:0006357 regulation of transcription by RNA polymerase II;GO:0006366 transcription by RNA polymerase II;GO:0006355 regulation of transcription, DNA-templated		Predicted intracellular proteins	Nucleoplasm (Approved)				0.0	0.0	0.0	0.0	0.0	0.0	0.0	0.0	0.0	0.0	0.0	0.0	0.0	0.0	0.0	0.0	0.0	0.0	0.0	0.0

## Sheet: Enrichment
GroupID	Category	Term	Description	LogP	Log(q-value)	InTerm_InList	Genes	Symbols
1_Summary	Reactome Gene Sets	R-HSA-3214815	HDACs deacetylate histones	-57.9831	-53.6214	49/94	3012,3013,3017,3018,8294,8329,8330,8331,8332,8334,8335,8336,8338,8340,8341,8342,8345,8348,8349,8350,8351,8352,8353,8354,8355,8356,8357,8358,8359,8360,8361,8362,8363,8364,8365,8366,8367,8368,8968,8969,8970,85235,85236,92815,121504,128312,317772,440689,653604,55506,347733,1021,2353,4193,4217,5600,7157,26523,2354,4915,388,3006,3007,3008,3009,8091,81619,23224,80312,201161,252969,8242,1454,2535,6657,7…	H2AC8,H2AC7,H2BC5,H2BC3,H4C9,H2AC13,H2AC15,H2AC14,H2AC16,H2AC6,H2AC4,H2AC17,H2AC20,H2BC13,H2BC15,H2BC14,H2BC9,H2BC17,H2BC21,H3C1,H3C4,H3C3,H3C6,H3C11,H3C8,H3C12,H3C10,H3C2,H4C1,H4C4,H4C6,H4C12,H4C11,H4C3,H4C8,H4C2,H4C5,H4C13,H3C7,H2AC11,H2BC11,H2AC12,H2BC12,H2AW,H4-16,H2BU1,H2AC21,H2BC18,H3C13,MACROH2A2,TUBB2B,CDK6,FOS,MDM2,MAP3K5,MAPK11,TP53,AGO1,FOSB,NTRK2,RHOB,H1-2,H1-3,H1-4,H1-5,HMGA2,TSPAN14…
1_Member	Reactome Gene Sets	R-HSA-3214815	HDACs deacetylate histones	-57.9831	-53.6214	49/94	3012,3013,3017,3018,8294,8329,8330,8331,8332,8334,8335,8336,8338,8340,8341,8342,8345,8348,8349,8350,8351,8352,8353,8354,8355,8356,8357,8358,8359,8360,8361,8362,8363,8364,8365,8366,8367,8368,8968,8969,8970,85235,85236,92815,121504,128312,317772,440689,653604	H2AC8,H2AC7,H2BC5,H2BC3,H4C9,H2AC13,H2AC15,H2AC14,H2AC16,H2AC6,H2AC4,H2AC17,H2AC20,H2BC13,H2BC15,H2BC14,H2BC9,H2BC17,H2BC21,H3C1,H3C4,H3C3,H3C6,H3C11,H3C8,H3C12,H3C10,H3C2,H4C1,H4C4,H4C6,H4C12,H4C11,H4C3,H4C8,H4C2,H4C5,H4C13,H3C7,H2AC11,H2BC11,H2AC12,H2BC12,H2AW,H4-16,H2BU1,H2AC21,H2BC18,H3C13
1_Member	Reactome Gene Sets	R-HSA-73728	RNA Polymerase I Promoter Opening	-52.2928	-48.256	40/63	3012,3013,3017,3018,8294,8331,8334,8335,8338,8340,8341,8342,8345,8348,8349,8350,8351,8352,8353,8354,8355,8356,8357,8358,8359,8360,8361,8362,8363,8364,8365,8366,8367,8368,8968,8970,85236,121504,128312,653604	H2AC8,H2AC7,H2BC5,H2BC3,H4C9,H2AC14,H2AC6,H2AC4,H2AC20,H2BC13,H2BC15,H2BC14,H2BC9,H2BC17,H2BC21,H3C1,H3C4,H3C3,H3C6,H3C11,H3C8,H3C12,H3C10,H3C2,H4C1,H4C4,H4C6,H4C12,H4C11,H4C3,H4C8,H4C2,H4C5,H4C13,H3C7,H2BC11,H2BC12,H4-16,H2BU1,H3C13
1_Member	Reactome Gene Sets	R-HSA-9610379	HCMV Late Events	-52.1406	-48.256	49/116	3012,3013,3017,3018,8294,8329,8330,8331,8332,8334,8335,8336,8338,8340,8341,8342,8345,8348,8349,8350,8351,8352,8353,8354,8355,8356,8357,8358,8359,8360,8361,8362,8363,8364,8365,8366,8367,8368,8968,8969,8970,85235,85236,92815,121504,128312,317772,440689,653604	H2AC8,H2AC7,H2BC5,H2BC3,H4C9,H2AC13,H2AC15,H2AC14,H2AC16,H2AC6,H2AC4,H2AC17,H2AC20,H2BC13,H2BC15,H2BC14,H2BC9,H2BC17,H2BC21,H3C1,H3C4,H3C3,H3C6,H3C11,H3C8,H3C12,H3C10,H3C2,H4C1,H4C4,H4C6,H4C12,H4C11,H4C3,H4C8,H4C2,H4C5,H4C13,H3C7,H2AC11,H2BC11,H2AC12,H2BC12,H2AW,H4-16,H2BU1,H2AC21,H2BC18,H3C13
1_Member	Reactome Gene Sets	R-HSA-5334118	DNA methylation	-51.4672	-47.7076	40/65	3012,3013,3017,3018,8294,8331,8334,8335,8338,8340,8341,8342,8345,8348,8349,8350,8351,8352,8353,8354,8355,8356,8357,8358,8359,8360,8361,8362,8363,8364,8365,8366,8367,8368,8968,8970,85236,121504,128312,653604	H2AC8,H2AC7,H2BC5,H2BC3,H4C9,H2AC14,H2AC6,H2AC4,H2AC20,H2BC13,H2BC15,H2BC14,H2BC9,H2BC17,H2BC21,H3C1,H3C4,H3C3,H3C6,H3C11,H3C8,H3C12,H3C10,H3C2,H4C1,H4C4,H4C6,H4C12,H4C11,H4C3,H4C8,H4C2,H4C5,H4C13,H3C7,H2BC11,H2BC12,H4-16,H2BU1,H3C13
1_Member	Reactome Gene Sets	R-HSA-5625886	Activated PKN1 stimulates transcription of AR (androgen receptor) regulated genes KLK2 and KLK3	-50.6834	-47.0206	40/67	3012,3013,3017,3018,8294,8331,8334,8335,8338,8340,8341,8342,8345,8348,8349,8350,8351,8352,8353,8354,8355,8356,8357,8358,8359,8360,8361,8362,8363,8364,8365,8366,8367,8368,8968,8970,85236,121504,128312,653604	H2AC8,H2AC7,H2BC5,H2BC3,H4C9,H2AC14,H2AC6,H2AC4,H2AC20,H2BC13,H2BC15,H2BC14,H2BC9,H2BC17,H2BC21,H3C1,H3C4,H3C3,H3C6,H3C11,H3C8,H3C12,H3C10,H3C2,H4C1,H4C4,H4C6,H4C12,H4C11,H4C3,H4C8,H4C2,H4C5,H4C13,H3C7,H2BC11,H2BC12,H4-16,H2BU1,H3C13
1_Member	Reactome Gene Sets	R-HSA-427359	SIRT1 negatively regulates rRNA expression	-50.3057	-46.7222	40/68	3012,3013,3017,3018,8294,8331,8334,8335,8338,8340,8341,8342,8345,8348,8349,8350,8351,8352,8353,8354,8355,8356,8357,8358,8359,8360,8361,8362,8363,8364,8365,8366,8367,8368,8968,8970,85236,121504,128312,653604	H2AC8,H2AC7,H2BC5,H2BC3,H4C9,H2AC14,H2AC6,H2AC4,H2AC20,H2BC13,H2BC15,H2BC14,H2BC9,H2BC17,H2BC21,H3C1,H3C4,H3C3,H3C6,H3C11,H3C8,H3C12,H3C10,H3C2,H4C1,H4C4,H4C6,H4C12,H4C11,H4C3,H4C8,H4C2,H4C5,H4C13,H3C7,H2BC11,H2BC12,H4-16,H2BU1,H3C13
1_Member	KEGG Pathway	hsa05322	Systemic lupus erythematosus	-50.1045	-46.6459	50/133	3012,3013,3017,3018,8294,8329,8330,8331,8332,8334,8335,8336,8338,8340,8341,8342,8345,8348,8349,8350,8351,8352,8353,8354,8355,8356,8357,8358,8359,8360,8361,8362,8363,8364,8365,8366,8367,8368,8968,8969,8970,55506,85235,85236,92815,121504,128312,317772,440689,653604	H2AC8,H2AC7,H2BC5,H2BC3,H4C9,H2AC13,H2AC15,H2AC14,H2AC16,H2AC6,H2AC4,H2AC17,H2AC20,H2BC13,H2BC15,H2BC14,H2BC9,H2BC17,H2BC21,H3C1,H3C4,H3C3,H3C6,H3C11,H3C8,H3C12,H3C10,H3C2,H4C1,H4C4,H4C6,H4C12,H4C11,H4C3,H4C8,H4C2,H4C5,H4C13,H3C7,H2AC11,H2BC11,MACROH2A2,H2AC12,H2BC12,H2AW,H4-16,H2BU1,H2AC21,H2BC18,H3C13
1_Member	KEGG Pathway	ko05322	Systemic lupus erythematosus	-50.1045	-46.6459	50/133	3012,3013,3017,3018,8294,8329,8330,8331,8332,8334,8335,8336,8338,8340,8341,8342,8345,8348,8349,8350,8351,8352,8353,8354,8355,8356,8357,8358,8359,8360,8361,8362,8363,8364,8365,8366,8367,8368,8968,8969,8970,55506,85235,85236,92815,121504,128312,317772,440689,653604	H2AC8,H2AC7,H2BC5,H2BC3,H4C9,H2AC13,H2AC15,H2AC14,H2AC16,H2AC6,H2AC4,H2AC17,H2AC20,H2BC13,H2BC15,H2BC14,H2BC9,H2BC17,H2BC21,H3C1,H3C4,H3C3,H3C6,H3C11,H3C8,H3C12,H3C10,H3C2,H4C1,H4C4,H4C6,H4C12,H4C11,H4C3,H4C8,H4C2,H4C5,H4C13,H3C7,H2AC11,H2BC11,MACROH2A2,H2AC12,H2BC12,H2AW,H4-16,H2BU1,H2AC21,H2BC18,H3C13
1_Member	Reactome Gene Sets	R-HSA-9609690	HCMV Early Events	-49.716	-46.3085	50/135	3012,3013,3017,3018,8294,8329,8330,8331,8332,8334,8335,8336,8338,8340,8341,8342,8345,8348,8349,8350,8351,8352,8353,8354,8355,8356,8357,8358,8359,8360,8361,8362,8363,8364,8365,8366,8367,8368,8968,8969,8970,85235,85236,92815,121504,128312,317772,347733,440689,653604	H2AC8,H2AC7,H2BC5,H2BC3,H4C9,H2AC13,H2AC15,H2AC14,H2AC16,H2AC6,H2AC4,H2AC17,H2AC20,H2BC13,H2BC15,H2BC14,H2BC9,H2BC17,H2BC21,H3C1,H3C4,H3C3,H3C6,H3C11,H3C8,H3C12,H3C10,H3C2,H4C1,H4C4,H4C6,H4C12,H4C11,H4C3,H4C8,H4C2,H4C5,H4C13,H3C7,H2AC11,H2BC11,H2AC12,H2BC12,H2AW,H4-16,H2BU1,H2AC21,TUBB2B,H2BC18,H3C13
1_Member	Reactome Gene Sets	R-HSA-212300	PRC2 methylates histones and DNA	-48.543	-45.2227	40/73	3012,3013,3017,3018,8294,8331,8334,8335,8338,8340,8341,8342,8345,8348,8349,8350,8351,8352,8353,8354,8355,8356,8357,8358,8359,8360,8361,8362,8363,8364,8365,8366,8367,8368,8968,8970,85236,121504,128312,653604	H2AC8,H2AC7,H2BC5,H2BC3,H4C9,H2AC14,H2AC6,H2AC4,H2AC20,H2BC13,H2BC15,H2BC14,H2BC9,H2BC17,H2BC21,H3C1,H3C4,H3C3,H3C6,H3C11,H3C8,H3C12,H3C10,H3C2,H4C1,H4C4,H4C6,H4C12,H4C11,H4C3,H4C8,H4C2,H4C5,H4C13,H3C7,H2BC11,H2BC12,H4-16,H2BU1,H3C13
1_Member	Reactome Gene Sets	R-HSA-9710421	Defective pyroptosis	-48.543	-45.2227	40/73	3012,3013,3017,3018,8294,8331,8334,8335,8338,8340,8341,8342,8345,8348,8349,8350,8351,8352,8353,8354,8355,8356,8357,8358,8359,8360,8361,8362,8363,8364,8365,8366,8367,8368,8968,8970,85236,121504,128312,653604	H2AC8,H2AC7,H2BC5,H2BC3,H4C9,H2AC14,H2AC6,H2AC4,H2AC20,H2BC13,H2BC15,H2BC14,H2BC9,H2BC17,H2BC21,H3C1,H3C4,H3C3,H3C6,H3C11,H3C8,H3C12,H3C10,H3C2,H4C1,H4C4,H4C6,H4C12,H4C11,H4C3,H4C8,H4C2,H4C5,H4C13,H3C7,H2BC11,H2BC12,H4-16,H2BU1,H3C13
1_Member	Reactome Gene Sets	R-HSA-2299718	Condensation of Prophase Chromosomes	-48.2129	-44.9304	40/74	3012,3013,3017,3018,8294,8331,8334,8335,8338,8340,8341,8342,8345,8348,8349,8350,8351,8352,8353,8354,8355,8356,8357,8358,8359,8360,8361,8362,8363,8364,8365,8366,8367,8368,8968,8970,85236,121504,128312,653604	H2AC8,H2AC7,H2BC5,H2BC3,H4C9,H2AC14,H2AC6,H2AC4,H2AC20,H2BC13,H2BC15,H2BC14,H2BC9,H2BC17,H2BC21,H3C1,H3C4,H3C3,H3C6,H3C11,H3C8,H3C12,H3C10,H3C2,H4C1,H4C4,H4C6,H4C12,H4C11,H4C3,H4C8,H4C2,H4C5,H4C13,H3C7,H2BC11,H2BC12,H4-16,H2BU1,H3C13
1_Member	Reactome Gene Sets	R-HSA-427389	ERCC6 (CSB) and EHMT2 (G9a) positively regulate rRNA expression	-47.5729	-44.3251	40/76	3012,3013,3017,3018,8294,8331,8334,8335,8338,8340,8341,8342,8345,8348,8349,8350,8351,8352,8353,8354,8355,8356,8357,8358,8359,8360,8361,8362,8363,8364,8365,8366,8367,8368,8968,8970,85236,121504,128312,653604	H2AC8,H2AC7,H2BC5,H2BC3,H4C9,H2AC14,H2AC6,H2AC4,H2AC20,H2BC13,H2BC15,H2BC14,H2BC9,H2BC17,H2BC21,H3C1,H3C4,H3C3,H3C6,H3C11,H3C8,H3C12,H3C10,H3C2,H4C1,H4C4,H4C6,H4C12,H4C11,H4C3,H4C8,H4C2,H4C5,H4C13,H3C7,H2BC11,H2BC12,H4-16,H2BU1,H3C13
1_Member	Reactome Gene Sets	R-HSA-2559580	Oxidative Stress Induced Senescence	-47.102	-43.8864	47/125	1021,2353,3012,3013,3017,3018,4193,4217,5600,7157,8294,8331,8334,8335,8338,8340,8341,8342,8345,8348,8349,8350,8351,8352,8353,8354,8355,8356,8357,8358,8359,8360,8361,8362,8363,8364,8365,8366,8367,8368,8968,8970,26523,85236,121504,128312,653604	CDK6,FOS,H2AC8,H2AC7,H2BC5,H2BC3,MDM2,MAP3K5,MAPK11,TP53,H4C9,H2AC14,H2AC6,H2AC4,H2AC20,H2BC13,H2BC15,H2BC14,H2BC9,H2BC17,H2BC21,H3C1,H3C4,H3C3,H3C6,H3C11,H3C8,H3C12,H3C10,H3C2,H4C1,H4C4,H4C6,H4C12,H4C11,H4C3,H4C8,H4C2,H4C5,H4C13,H3C7,H2BC11,AGO1,H2BC12,H4-16,H2BU1,H3C13
1_Member	Reactome Gene Sets	R-HSA-3214847	HATs acetylate histones	-46.9401	-43.7544	49/142	3012,3013,3017,3018,8294,8329,8330,8331,8332,8334,8335,8336,8338,8340,8341,8342,8345,8348,8349,8350,8351,8352,8353,8354,8355,8356,8357,8358,8359,8360,8361,8362,8363,8364,8365,8366,8367,8368,8968,8969,8970,85235,85236,92815,121504,128312,317772,440689,653604	H2AC8,H2AC7,H2BC5,H2BC3,H4C9,H2AC13,H2AC15,H2AC14,H2AC16,H2AC6,H2AC4,H2AC17,H2AC20,H2BC13,H2BC15,H2BC14,H2BC9,H2BC17,H2BC21,H3C1,H3C4,H3C3,H3C6,H3C11,H3C8,H3C12,H3C10,H3C2,H4C1,H4C4,H4C6,H4C12,H4C11,H4C3,H4C8,H4C2,H4C5,H4C13,H3C7,H2AC11,H2BC11,H2AC12,H2BC12,H2AW,H4-16,H2BU1,H2AC21,H2BC18,H3C13
1_Member	Reactome Gene Sets	R-HSA-1912408	Pre-NOTCH Transcription and Translation	-46.2447	-43.0871	42/93	3012,3013,3017,3018,7157,8294,8331,8334,8335,8338,8340,8341,8342,8345,8348,8349,8350,8351,8352,8353,8354,8355,8356,8357,8358,8359,8360,8361,8362,8363,8364,8365,8366,8367,8368,8968,8970,26523,85236,121504,128312,653604	H2AC8,H2AC7,H2BC5,H2BC3,TP53,H4C9,H2AC14,H2AC6,H2AC4,H2AC20,H2BC13,H2BC15,H2BC14,H2BC9,H2BC17,H2BC21,H3C1,H3C4,H3C3,H3C6,H3C11,H3C8,H3C12,H3C10,H3C2,H4C1,H4C4,H4C6,H4C12,H4C11,H4C3,H4C8,H4C2,H4C5,H4C13,H3C7,H2BC11,AGO1,H2BC12,H4-16,H2BU1,H3C13
1_Member	Reactome Gene Sets	R-HSA-9609646	HCMV Infection	-45.4139	-42.2826	50/160	3012,3013,3017,3018,8294,8329,8330,8331,8332,8334,8335,8336,8338,8340,8341,8342,8345,8348,8349,8350,8351,8352,8353,8354,8355,8356,8357,8358,8359,8360,8361,8362,8363,8364,8365,8366,8367,8368,8968,8969,8970,85235,85236,92815,121504,128312,317772,347733,440689,653604	H2AC8,H2AC7,H2BC5,H2BC3,H4C9,H2AC13,H2AC15,H2AC14,H2AC16,H2AC6,H2AC4,H2AC17,H2AC20,H2BC13,H2BC15,H2BC14,H2BC9,H2BC17,H2BC21,H3C1,H3C4,H3C3,H3C6,H3C11,H3C8,H3C12,H3C10,H3C2,H4C1,H4C4,H4C6,H4C12,H4C11,H4C3,H4C8,H4C2,H4C5,H4C13,H3C7,H2AC11,H2BC11,H2AC12,H2BC12,H2AW,H4-16,H2BU1,H2AC21,TUBB2B,H2BC18,H3C13
1_Member	KEGG Pathway	ko05034	Alcoholism	-45.2331	-42.1266	52/180	2354,3012,3013,3017,3018,4915,8294,8329,8330,8331,8332,8334,8335,8336,8338,8340,8341,8342,8345,8348,8349,8350,8351,8352,8353,8354,8355,8356,8357,8358,8359,8360,8361,8362,8363,8364,8365,8366,8367,8368,8968,8969,8970,55506,85235,85236,92815,121504,128312,317772,440689,653604	FOSB,H2AC8,H2AC7,H2BC5,H2BC3,NTRK2,H4C9,H2AC13,H2AC15,H2AC14,H2AC16,H2AC6,H2AC4,H2AC17,H2AC20,H2BC13,H2BC15,H2BC14,H2BC9,H2BC17,H2BC21,H3C1,H3C4,H3C3,H3C6,H3C11,H3C8,H3C12,H3C10,H3C2,H4C1,H4C4,H4C6,H4C12,H4C11,H4C3,H4C8,H4C2,H4C5,H4C13,H3C7,H2AC11,H2BC11,MACROH2A2,H2AC12,H2BC12,H2AW,H4-16,H2BU1,H2AC21,H2BC18,H3C13
1_Member	Reactome Gene Sets	R-HSA-912446	Meiotic recombination	-44.7112	-41.6282	40/86	3012,3013,3017,3018,8294,8331,8334,8335,8338,8340,8341,8342,8345,8348,8349,8350,8351,8352,8353,8354,8355,8356,8357,8358,8359,8360,8361,8362,8363,8364,8365,8366,8367,8368,8968,8970,85236,121504,128312,653604	H2AC8,H2AC7,H2BC5,H2BC3,H4C9,H2AC14,H2AC6,H2AC4,H2AC20,H2BC13,H2BC15,H2BC14,H2BC9,H2BC17,H2BC21,H3C1,H3C4,H3C3,H3C6,H3C11,H3C8,H3C12,H3C10,H3C2,H4C1,H4C4,H4C6,H4C12,H4C11,H4C3,H4C8,H4C2,H4C5,H4C13,H3C7,H2BC11,H2BC12,H4-16,H2BU1,H3C13
1_Member	KEGG Pathway	hsa05034	Alcoholism	-44.5451	-41.4844	52/185	2354,3012,3013,3017,3018,4915,8294,8329,8330,8331,8332,8334,8335,8336,8338,8340,8341,8342,8345,8348,8349,8350,8351,8352,8353,8354,8355,8356,8357,8358,8359,8360,8361,8362,8363,8364,8365,8366,8367,8368,8968,8969,8970,55506,85235,85236,92815,121504,128312,317772,440689,653604	FOSB,H2AC8,H2AC7,H2BC5,H2BC3,NTRK2,H4C9,H2AC13,H2AC15,H2AC14,H2AC16,H2AC6,H2AC4,H2AC17,H2AC20,H2BC13,H2BC15,H2BC14,H2BC9,H2BC17,H2BC21,H3C1,H3C4,H3C3,H3C6,H3C11,H3C8,H3C12,H3C10,H3C2,H4C1,H4C4,H4C6,H4C12,H4C11,H4C3,H4C8,H4C2,H4C5,H4C13,H3C7,H2AC11,H2BC11,MACROH2A2,H2AC12,H2BC12,H2AW,H4-16,H2BU1,H2AC21,H2BC18,H3C13
1_Member	Reactome Gene Sets	R-HSA-5625740	RHO GTPases activate PKNs	-44.1221	-41.0826	41/95	388,3012,3013,3017,3018,8294,8331,8334,8335,8338,8340,8341,8342,8345,8348,8349,8350,8351,8352,8353,8354,8355,8356,8357,8358,8359,8360,8361,8362,8363,8364,8365,8366,8367,8368,8968,8970,85236,121504,128312,653604	RHOB,H2AC8,H2AC7,H2BC5,H2BC3,H4C9,H2AC14,H2AC6,H2AC4,H2AC20,H2BC13,H2BC15,H2BC14,H2BC9,H2BC17,H2BC21,H3C1,H3C4,H3C3,H3C6,H3C11,H3C8,H3C12,H3C10,H3C2,H4C1,H4C4,H4C6,H4C12,H4C11,H4C3,H4C8,H4C2,H4C5,H4C13,H3C7,H2BC11,H2BC12,H4-16,H2BU1,H3C13
1_Member	Reactome Gene Sets	R-HSA-9616222	Transcriptional regulation of granulopoiesis	-43.6969	-40.6776	40/90	3012,3013,3017,3018,8294,8331,8334,8335,8338,8340,8341,8342,8345,8348,8349,8350,8351,8352,8353,8354,8355,8356,8357,8358,8359,8360,8361,8362,8363,8364,8365,8366,8367,8368,8968,8970,85236,121504,128312,653604	H2AC8,H2AC7,H2BC5,H2BC3,H4C9,H2AC14,H2AC6,H2AC4,H2AC20,H2BC13,H2BC15,H2BC14,H2BC9,H2BC17,H2BC21,H3C1,H3C4,H3C3,H3C6,H3C11,H3C8,H3C12,H3C10,H3C2,H4C1,H4C4,H4C6,H4C12,H4C11,H4C3,H4C8,H4C2,H4C5,H4C13,H3C7,H2BC11,H2BC12,H4-16,H2BU1,H3C13
1_Member	Reactome Gene Sets	R-HSA-8936459	RUNX1 regulates genes involved in megakaryocyte differentiation and platelet function	-43.657	-40.657	41/97	3012,3013,3017,3018,8294,8331,8334,8335,8338,8340,8341,8342,8345,8348,8349,8350,8351,8352,8353,8354,8355,8356,8357,8358,8359,8360,8361,8362,8363,8364,8365,8366,8367,8368,8968,8970,26523,85236,121504,128312,653604	H2AC8,H2AC7,H2BC5,H2BC3,H4C9,H2AC14,H2AC6,H2AC4,H2AC20,H2BC13,H2BC15,H2BC14,H2BC9,H2BC17,H2BC21,H3C1,H3C4,H3C3,H3C6,H3C11,H3C8,H3C12,H3C10,H3C2,H4C1,H4C4,H4C6,H4C12,H4C11,H4C3,H4C8,H4C2,H4C5,H4C13,H3C7,H2BC11,AGO1,H2BC12,H4-16,H2BU1,H3C13
1_Member	Reactome Gene Sets	R-HSA-201722	Formation of the beta-catenin:TCF transactivating complex	-43.4532	-40.5064	40/91	3012,3013,3017,3018,8294,8331,8334,8335,8338,8340,8341,8342,8345,8348,8349,8350,8351,8352,8353,8354,8355,8356,8357,8358,8359,8360,8361,8362,8363,8364,8365,8366,8367,8368,8968,8970,85236,121504,128312,653604	H2AC8,H2AC7,H2BC5,H2BC3,H4C9,H2AC14,H2AC6,H2AC4,H2AC20,H2BC13,H2BC15,H2BC14,H2BC9,H2BC17,H2BC21,H3C1,H3C4,H3C3,H3C6,H3C11,H3C8,H3C12,H3C10,H3C2,H4C1,H4C4,H4C6,H4C12,H4C11,H4C3,H4C8,H4C2,H4C5,H4C13,H3C7,H2BC11,H2BC12,H4-16,H2BU1,H3C13
1_Member	Reactome Gene Sets	R-HSA-5250924	B-WICH complex positively regulates rRNA expression	-43.4532	-40.5064	40/91	3012,3013,3017,3018,8294,8331,8334,8335,8338,8340,8341,8342,8345,8348,8349,8350,8351,8352,8353,8354,8355,8356,8357,8358,8359,8360,8361,8362,8363,8364,8365,8366,8367,8368,8968,8970,85236,121504,128312,653604	H2AC8,H2AC7,H2BC5,H2BC3,H4C9,H2AC14,H2AC6,H2AC4,H2AC20,H2BC13,H2BC15,H2BC14,H2BC9,H2BC17,H2BC21,H3C1,H3C4,H3C3,H3C6,H3C11,H3C8,H3C12,H3C10,H3C2,H4C1,H4C4,H4C6,H4C12,H4C11,H4C3,H4C8,H4C2,H4C5,H4C13,H3C7,H2BC11,H2BC12,H4-16,H2BU1,H3C13
1_Member	Reactome Gene Sets	R-HSA-73772	RNA Polymerase I Promoter Escape	-43.4532	-40.5064	40/91	3012,3013,3017,3018,8294,8331,8334,8335,8338,8340,8341,8342,8345,8348,8349,8350,8351,8352,8353,8354,8355,8356,8357,8358,8359,8360,8361,8362,8363,8364,8365,8366,8367,8368,8968,8970,85236,121504,128312,653604	H2AC8,H2AC7,H2BC5,H2BC3,H4C9,H2AC14,H2AC6,H2AC4,H2AC20,H2BC13,H2BC15,H2BC14,H2BC9,H2BC17,H2BC21,H3C1,H3C4,H3C3,H3C6,H3C11,H3C8,H3C12,H3C10,H3C2,H4C1,H4C4,H4C6,H4C12,H4C11,H4C3,H4C8,H4C2,H4C5,H4C13,H3C7,H2BC11,H2BC12,H4-16,H2BU1,H3C13
1_Member	Reactome Gene Sets	R-HSA-2559583	Cellular Senescence	-42.9844	-40.0541	52/197	1021,2353,3006,3007,3008,3009,3012,3013,3017,3018,4193,4217,5600,7157,8091,8294,8331,8334,8335,8338,8340,8341,8342,8345,8348,8349,8350,8351,8352,8353,8354,8355,8356,8357,8358,8359,8360,8361,8362,8363,8364,8365,8366,8367,8368,8968,8970,26523,85236,121504,128312,653604	CDK6,FOS,H1-2,H1-3,H1-4,H1-5,H2AC8,H2AC7,H2BC5,H2BC3,MDM2,MAP3K5,MAPK11,TP53,HMGA2,H4C9,H2AC14,H2AC6,H2AC4,H2AC20,H2BC13,H2BC15,H2BC14,H2BC9,H2BC17,H2BC21,H3C1,H3C4,H3C3,H3C6,H3C11,H3C8,H3C12,H3C10,H3C2,H4C1,H4C4,H4C6,H4C12,H4C11,H4C3,H4C8,H4C2,H4C5,H4C13,H3C7,H2BC11,AGO1,H2BC12,H4-16,H2BU1,H3C13
1_Member	Reactome Gene Sets	R-HSA-1912422	Pre-NOTCH Expression and Processing	-42.6429	-39.7283	42/109	3012,3013,3017,3018,7157,8294,8331,8334,8335,8338,8340,8341,8342,8345,8348,8349,8350,8351,8352,8353,8354,8355,8356,8357,8358,8359,8360,8361,8362,8363,8364,8365,8366,8367,8368,8968,8970,26523,85236,121504,128312,653604	H2AC8,H2AC7,H2BC5,H2BC3,TP53,H4C9,H2AC14,H2AC6,H2AC4,H2AC20,H2BC13,H2BC15,H2BC14,H2BC9,H2BC17,H2BC21,H3C1,H3C4,H3C3,H3C6,H3C11,H3C8,H3C12,H3C10,H3C2,H4C1,H4C4,H4C6,H4C12,H4C11,H4C3,H4C8,H4C2,H4C5,H4C13,H3C7,H2BC11,AGO1,H2BC12,H4-16,H2BU1,H3C13
1_Member	Reactome Gene Sets	R-HSA-9645723	Diseases of programmed cell death	-42.3367	-39.4374	41/103	3012,3013,3017,3018,7157,8294,8331,8334,8335,8338,8340,8341,8342,8345,8348,8349,8350,8351,8352,8353,8354,8355,8356,8357,8358,8359,8360,8361,8362,8363,8364,8365,8366,8367,8368,8968,8970,85236,121504,128312,653604	H2AC8,H2AC7,H2BC5,H2BC3,TP53,H4C9,H2AC14,H2AC6,H2AC4,H2AC20,H2BC13,H2BC15,H2BC14,H2BC9,H2BC17,H2BC21,H3C1,H3C4,H3C3,H3C6,H3C11,H3C8,H3C12,H3C10,H3C2,H4C1,H4C4,H4C6,H4C12,H4C11,H4C3,H4C8,H4C2,H4C5,H4C13,H3C7,H2BC11,H2BC12,H4-16,H2BU1,H3C13
1_Member	Reactome Gene Sets	R-HSA-2559582	Senescence-Associated Secretory Phenotype (SASP)	-42.0465	-39.1619	42/112	1021,2353,3012,3013,3017,3018,8294,8331,8334,8335,8338,8340,8341,8342,8345,8348,8349,8350,8351,8352,8353,8354,8355,8356,8357,8358,8359,8360,8361,8362,8363,8364,8365,8366,8367,8368,8968,8970,85236,121504,128312,653604	CDK6,FOS,H2AC8,H2AC7,H2BC5,H2BC3,H4C9,H2AC14,H2AC6,H2AC4,H2AC20,H2BC13,H2BC15,H2BC14,H2BC9,H2BC17,H2BC21,H3C1,H3C4,H3C3,H3C6,H3C11,H3C8,H3C12,H3C10,H3C2,H4C1,H4C4,H4C6,H4C12,H4C11,H4C3,H4C8,H4C2,H4C5,H4C13,H3C7,H2BC11,H2BC12,H4-16,H2BU1,H3C13
1_Member	Reactome Gene Sets	R-HSA-5578749	Transcriptional regulation by small RNAs	-41.7147	-38.8444	41/106	3012,3013,3017,3018,8294,8331,8334,8335,8338,8340,8341,8342,8345,8348,8349,8350,8351,8352,8353,8354,8355,8356,8357,8358,8359,8360,8361,8362,8363,8364,8365,8366,8367,8368,8968,8970,26523,85236,121504,128312,653604	H2AC8,H2AC7,H2BC5,H2BC3,H4C9,H2AC14,H2AC6,H2AC4,H2AC20,H2BC13,H2BC15,H2BC14,H2BC9,H2BC17,H2BC21,H3C1,H3C4,H3C3,H3C6,H3C11,H3C8,H3C12,H3C10,H3C2,H4C1,H4C4,H4C6,H4C12,H4C11,H4C3,H4C8,H4C2,H4C5,H4C13,H3C7,H2BC11,AGO1,H2BC12,H4-16,H2BU1,H3C13
1_Member	Reactome Gene Sets	R-HSA-3214858	RMTs methylate histone arginines	-41.5214	-38.6649	37/79	3012,3013,8294,8329,8330,8331,8332,8334,8335,8336,8338,8350,8351,8352,8353,8354,8355,8356,8357,8358,8359,8360,8361,8362,8363,8364,8365,8366,8367,8368,8968,8969,85235,92815,121504,317772,653604	H2AC8,H2AC7,H4C9,H2AC13,H2AC15,H2AC14,H2AC16,H2AC6,H2AC4,H2AC17,H2AC20,H3C1,H3C4,H3C3,H3C6,H3C11,H3C8,H3C12,H3C10,H3C2,H4C1,H4C4,H4C6,H4C12,H4C11,H4C3,H4C8,H4C2,H4C5,H4C13,H3C7,H2AC11,H2AC12,H2AW,H4-16,H2AC21,H3C13
1_Member	Reactome Gene Sets	R-HSA-977225	Amyloid fiber formation	-40.7284	-37.8852	41/111	3012,3013,3017,3018,8294,8331,8334,8335,8338,8340,8341,8342,8345,8348,8349,8350,8351,8352,8353,8354,8355,8356,8357,8358,8359,8360,8361,8362,8363,8364,8365,8366,8367,8368,8968,8970,81619,85236,121504,128312,653604	H2AC8,H2AC7,H2BC5,H2BC3,H4C9,H2AC14,H2AC6,H2AC4,H2AC20,H2BC13,H2BC15,H2BC14,H2BC9,H2BC17,H2BC21,H3C1,H3C4,H3C3,H3C6,H3C11,H3C8,H3C12,H3C10,H3C2,H4C1,H4C4,H4C6,H4C12,H4C11,H4C3,H4C8,H4C2,H4C5,H4C13,H3C7,H2BC11,TSPAN14,H2BC12,H4-16,H2BU1,H3C13
1_Member	Reactome Gene Sets	R-HSA-5250913	Positive epigenetic regulation of rRNA expression	-40.1858	-37.3556	40/106	3012,3013,3017,3018,8294,8331,8334,8335,8338,8340,8341,8342,8345,8348,8349,8350,8351,8352,8353,8354,8355,8356,8357,8358,8359,8360,8361,8362,8363,8364,8365,8366,8367,8368,8968,8970,85236,121504,128312,653604	H2AC8,H2AC7,H2BC5,H2BC3,H4C9,H2AC14,H2AC6,H2AC4,H2AC20,H2BC13,H2BC15,H2BC14,H2BC9,H2BC17,H2BC21,H3C1,H3C4,H3C3,H3C6,H3C11,H3C8,H3C12,H3C10,H3C2,H4C1,H4C4,H4C6,H4C12,H4C11,H4C3,H4C8,H4C2,H4C5,H4C13,H3C7,H2BC11,H2BC12,H4-16,H2BU1,H3C13
1_Member	Reactome Gene Sets	R-HSA-427413	NoRC negatively regulates rRNA expression	-39.9903	-37.1726	40/107	3012,3013,3017,3018,8294,8331,8334,8335,8338,8340,8341,8342,8345,8348,8349,8350,8351,8352,8353,8354,8355,8356,8357,8358,8359,8360,8361,8362,8363,8364,8365,8366,8367,8368,8968,8970,85236,121504,128312,653604	H2AC8,H2AC7,H2BC5,H2BC3,H4C9,H2AC14,H2AC6,H2AC4,H2AC20,H2BC13,H2BC15,H2BC14,H2BC9,H2BC17,H2BC21,H3C1,H3C4,H3C3,H3C6,H3C11,H3C8,H3C12,H3C10,H3C2,H4C1,H4C4,H4C6,H4C12,H4C11,H4C3,H4C8,H4C2,H4C5,H4C13,H3C7,H2BC11,H2BC12,H4-16,H2BU1,H3C13
1_Member	Reactome Gene Sets	R-HSA-1500620	Meiosis	-39.4414	-36.636	41/118	3012,3013,3017,3018,8294,8331,8334,8335,8338,8340,8341,8342,8345,8348,8349,8350,8351,8352,8353,8354,8355,8356,8357,8358,8359,8360,8361,8362,8363,8364,8365,8366,8367,8368,8968,8970,23224,85236,121504,128312,653604	H2AC8,H2AC7,H2BC5,H2BC3,H4C9,H2AC14,H2AC6,H2AC4,H2AC20,H2BC13,H2BC15,H2BC14,H2BC9,H2BC17,H2BC21,H3C1,H3C4,H3C3,H3C6,H3C11,H3C8,H3C12,H3C10,H3C2,H4C1,H4C4,H4C6,H4C12,H4C11,H4C3,H4C8,H4C2,H4C5,H4C13,H3C7,H2BC11,SYNE2,H2BC12,H4-16,H2BU1,H3C13
1_Member	Reactome Gene Sets	R-HSA-5250941	Negative epigenetic regulation of rRNA expression	-39.4176	-36.6357	40/110	3012,3013,3017,3018,8294,8331,8334,8335,8338,8340,8341,8342,8345,8348,8349,8350,8351,8352,8353,8354,8355,8356,8357,8358,8359,8360,8361,8362,8363,8364,8365,8366,8367,8368,8968,8970,85236,121504,128312,653604	H2AC8,H2AC7,H2BC5,H2BC3,H4C9,H2AC14,H2AC6,H2AC4,H2AC20,H2BC13,H2BC15,H2BC14,H2BC9,H2BC17,H2BC21,H3C1,H3C4,H3C3,H3C6,H3C11,H3C8,H3C12,H3C10,H3C2,H4C1,H4C4,H4C6,H4C12,H4C11,H4C3,H4C8,H4C2,H4C5,H4C13,H3C7,H2BC11,H2BC12,H4-16,H2BU1,H3C13
1_Member	Reactome Gene Sets	R-HSA-73854	RNA Polymerase I Promoter Clearance	-39.4176	-36.6357	40/110	3012,3013,3017,3018,8294,8331,8334,8335,8338,8340,8341,8342,8345,8348,8349,8350,8351,8352,8353,8354,8355,8356,8357,8358,8359,8360,8361,8362,8363,8364,8365,8366,8367,8368,8968,8970,85236,121504,128312,653604	H2AC8,H2AC7,H2BC5,H2BC3,H4C9,H2AC14,H2AC6,H2AC4,H2AC20,H2BC13,H2BC15,H2BC14,H2BC9,H2BC17,H2BC21,H3C1,H3C4,H3C3,H3C6,H3C11,H3C8,H3C12,H3C10,H3C2,H4C1,H4C4,H4C6,H4C12,H4C11,H4C3,H4C8,H4C2,H4C5,H4C13,H3C7,H2BC11,H2BC12,H4-16,H2BU1,H3C13
1_Member	Reactome Gene Sets	R-HSA-73864	RNA Polymerase I Transcription	-39.0471	-36.2765	40/112	3012,3013,3017,3018,8294,8331,8334,8335,8338,8340,8341,8342,8345,8348,8349,8350,8351,8352,8353,8354,8355,8356,8357,8358,8359,8360,8361,8362,8363,8364,8365,8366,8367,8368,8968,8970,85236,121504,128312,653604	H2AC8,H2AC7,H2BC5,H2BC3,H4C9,H2AC14,H2AC6,H2AC4,H2AC20,H2BC13,H2BC15,H2BC14,H2BC9,H2BC17,H2BC21,H3C1,H3C4,H3C3,H3C6,H3C11,H3C8,H3C12,H3C10,H3C2,H4C1,H4C4,H4C6,H4C12,H4C11,H4C3,H4C8,H4C2,H4C5,H4C13,H3C7,H2BC11,H2BC12,H4-16,H2BU1,H3C13
1_Member	Reactome Gene Sets	R-HSA-2559586	DNA Damage/Telomere Stress Induced Senescence	-37.9675	-35.2079	35/80	3006,3007,3008,3009,3012,3013,3017,3018,7157,8091,8294,8331,8334,8335,8338,8340,8341,8342,8345,8348,8349,8359,8360,8361,8362,8363,8364,8365,8366,8367,8368,8970,85236,121504,128312	H1-2,H1-3,H1-4,H1-5,H2AC8,H2AC7,H2BC5,H2BC3,TP53,HMGA2,H4C9,H2AC14,H2AC6,H2AC4,H2AC20,H2BC13,H2BC15,H2BC14,H2BC9,H2BC17,H2BC21,H4C1,H4C4,H4C6,H4C12,H4C11,H4C3,H4C8,H4C2,H4C5,H4C13,H2BC11,H2BC12,H4-16,H2BU1
1_Member	Reactome Gene Sets	R-HSA-5617472	Activation of anterior HOX genes in hindbrain development during early embryogenesis	-37.4801	-34.7416	40/121	3012,3013,3017,3018,8294,8331,8334,8335,8338,8340,8341,8342,8345,8348,8349,8350,8351,8352,8353,8354,8355,8356,8357,8358,8359,8360,8361,8362,8363,8364,8365,8366,8367,8368,8968,8970,85236,121504,128312,653604	H2AC8,H2AC7,H2BC5,H2BC3,H4C9,H2AC14,H2AC6,H2AC4,H2AC20,H2BC13,H2BC15,H2BC14,H2BC9,H2BC17,H2BC21,H3C1,H3C4,H3C3,H3C6,H3C11,H3C8,H3C12,H3C10,H3C2,H4C1,H4C4,H4C6,H4C12,H4C11,H4C3,H4C8,H4C2,H4C5,H4C13,H3C7,H2BC11,H2BC12,H4-16,H2BU1,H3C13
1_Member	Reactome Gene Sets	R-HSA-5619507	Activation of HOX genes during differentiation	-37.4801	-34.7416	40/121	3012,3013,3017,3018,8294,8331,8334,8335,8338,8340,8341,8342,8345,8348,8349,8350,8351,8352,8353,8354,8355,8356,8357,8358,8359,8360,8361,8362,8363,8364,8365,8366,8367,8368,8968,8970,85236,121504,128312,653604	H2AC8,H2AC7,H2BC5,H2BC3,H4C9,H2AC14,H2AC6,H2AC4,H2AC20,H2BC13,H2BC15,H2BC14,H2BC9,H2BC17,H2BC21,H3C1,H3C4,H3C3,H3C6,H3C11,H3C8,H3C12,H3C10,H3C2,H4C1,H4C4,H4C6,H4C12,H4C11,H4C3,H4C8,H4C2,H4C5,H4C13,H3C7,H2BC11,H2BC12,H4-16,H2BU1,H3C13
1_Member	Reactome Gene Sets	R-HSA-9018519	Estrogen-dependent gene expression	-37.2584	-34.5301	43/150	2353,2354,3012,3013,3017,3018,8294,8331,8334,8335,8338,8340,8341,8342,8345,8348,8349,8350,8351,8352,8353,8354,8355,8356,8357,8358,8359,8360,8361,8362,8363,8364,8365,8366,8367,8368,8968,8970,26523,85236,121504,128312,653604	FOS,FOSB,H2AC8,H2AC7,H2BC5,H2BC3,H4C9,H2AC14,H2AC6,H2AC4,H2AC20,H2BC13,H2BC15,H2BC14,H2BC9,H2BC17,H2BC21,H3C1,H3C4,H3C3,H3C6,H3C11,H3C8,H3C12,H3C10,H3C2,H4C1,H4C4,H4C6,H4C12,H4C11,H4C3,H4C8,H4C2,H4C5,H4C13,H3C7,H2BC11,AGO1,H2BC12,H4-16,H2BU1,H3C13
1_Member	Reactome Gene Sets	R-HSA-211000	Gene Silencing by RNA	-36.2476	-33.5294	41/138	3012,3013,3017,3018,8294,8331,8334,8335,8338,8340,8341,8342,8345,8348,8349,8350,8351,8352,8353,8354,8355,8356,8357,8358,8359,8360,8361,8362,8363,8364,8365,8366,8367,8368,8968,8970,26523,85236,121504,128312,653604	H2AC8,H2AC7,H2BC5,H2BC3,H4C9,H2AC14,H2AC6,H2AC4,H2AC20,H2BC13,H2BC15,H2BC14,H2BC9,H2BC17,H2BC21,H3C1,H3C4,H3C3,H3C6,H3C11,H3C8,H3C12,H3C10,H3C2,H4C1,H4C4,H4C6,H4C12,H4C11,H4C3,H4C8,H4C2,H4C5,H4C13,H3C7,H2BC11,AGO1,H2BC12,H4-16,H2BU1,H3C13
1_Member	GO Biological Processes	GO:0006334	nucleosome assembly	-36.2078	-33.4993	40/129	3006,3007,3008,3009,3017,3018,8294,8340,8341,8342,8345,8348,8349,8350,8351,8352,8353,8354,8355,8356,8357,8358,8359,8360,8361,8362,8363,8364,8365,8366,8367,8368,8968,8970,55506,85236,121504,128312,440689,653604	H1-2,H1-3,H1-4,H1-5,H2BC5,H2BC3,H4C9,H2BC13,H2BC15,H2BC14,H2BC9,H2BC17,H2BC21,H3C1,H3C4,H3C3,H3C6,H3C11,H3C8,H3C12,H3C10,H3C2,H4C1,H4C4,H4C6,H4C12,H4C11,H4C3,H4C8,H4C2,H4C5,H4C13,H3C7,H2BC11,MACROH2A2,H2BC12,H4-16,H2BU1,H2BC18,H3C13
1_Member	Reactome Gene Sets	R-HSA-8939236	RUNX1 regulates transcription of genes involved in differentiation of HSCs	-36.0558	-33.3569	40/130	3012,3013,3017,3018,8294,8331,8334,8335,8338,8340,8341,8342,8345,8348,8349,8350,8351,8352,8353,8354,8355,8356,8357,8358,8359,8360,8361,8362,8363,8364,8365,8366,8367,8368,8968,8970,85236,121504,128312,653604	H2AC8,H2AC7,H2BC5,H2BC3,H4C9,H2AC14,H2AC6,H2AC4,H2AC20,H2BC13,H2BC15,H2BC14,H2BC9,H2BC17,H2BC21,H3C1,H3C4,H3C3,H3C6,H3C11,H3C8,H3C12,H3C10,H3C2,H4C1,H4C4,H4C6,H4C12,H4C11,H4C3,H4C8,H4C2,H4C5,H4C13,H3C7,H2BC11,H2BC12,H4-16,H2BU1,H3C13
1_Member	Reactome Gene Sets	R-HSA-171306	Packaging Of Telomere Ends	-35.5914	-32.9018	29/52	3012,3013,3017,3018,8294,8331,8334,8335,8338,8340,8341,8342,8345,8348,8349,8359,8360,8361,8362,8363,8364,8365,8366,8367,8368,8970,85236,121504,128312	H2AC8,H2AC7,H2BC5,H2BC3,H4C9,H2AC14,H2AC6,H2AC4,H2AC20,H2BC13,H2BC15,H2BC14,H2BC9,H2BC17,H2BC21,H4C1,H4C4,H4C6,H4C12,H4C11,H4C3,H4C8,H4C2,H4C5,H4C13,H2BC11,H2BC12,H4-16,H2BU1
1_Member	Reactome Gene Sets	R-HSA-1474165	Reproduction	-35.54	-32.8595	41/143	3012,3013,3017,3018,8294,8331,8334,8335,8338,8340,8341,8342,8345,8348,8349,8350,8351,8352,8353,8354,8355,8356,8357,8358,8359,8360,8361,8362,8363,8364,8365,8366,8367,8368,8968,8970,23224,85236,121504,128312,653604	H2AC8,H2AC7,H2BC5,H2BC3,H4C9,H2AC14,H2AC6,H2AC4,H2AC20,H2BC13,H2BC15,H2BC14,H2BC9,H2BC17,H2BC21,H3C1,H3C4,H3C3,H3C6,H3C11,H3C8,H3C12,H3C10,H3C2,H4C1,H4C4,H4C6,H4C12,H4C11,H4C3,H4C8,H4C2,H4C5,H4C13,H3C7,H2BC11,SYNE2,H2BC12,H4-16,H2BU1,H3C13
1_Member	Reactome Gene Sets	R-HSA-212165	Epigenetic regulation of gene expression	-34.7306	-32.0591	41/149	3012,3013,3017,3018,8294,8331,8334,8335,8338,8340,8341,8342,8345,8348,8349,8350,8351,8352,8353,8354,8355,8356,8357,8358,8359,8360,8361,8362,8363,8364,8365,8366,8367,8368,8968,8970,80312,85236,121504,128312,653604	H2AC8,H2AC7,H2BC5,H2BC3,H4C9,H2AC14,H2AC6,H2AC4,H2AC20,H2BC13,H2BC15,H2BC14,H2BC9,H2BC17,H2BC21,H3C1,H3C4,H3C3,H3C6,H3C11,H3C8,H3C12,H3C10,H3C2,H4C1,H4C4,H4C6,H4C12,H4C11,H4C3,H4C8,H4C2,H4C5,H4C13,H3C7,H2BC11,TET1,H2BC12,H4-16,H2BU1,H3C13
1_Member	GO Biological Processes	GO:0031497	chromatin assembly	-34.573	-31.9318	44/182	3006,3007,3008,3009,3017,3018,7157,8091,8294,8340,8341,8342,8345,8348,8349,8350,8351,8352,8353,8354,8355,8356,8357,8358,8359,8360,8361,8362,8363,8364,8365,8366,8367,8368,8968,8970,55506,80312,85236,121504,128312,201161,440689,653604	H1-2,H1-3,H1-4,H1-5,H2BC5,H2BC3,TP53,HMGA2,H4C9,H2BC13,H2BC15,H2BC14,H2BC9,H2BC17,H2BC21,H3C1,H3C4,H3C3,H3C6,H3C11,H3C8,H3C12,H3C10,H3C2,H4C1,H4C4,H4C6,H4C12,H4C11,H4C3,H4C8,H4C2,H4C5,H4C13,H3C7,H2BC11,MACROH2A2,TET1,H2BC12,H4-16,H2BU1,CENPV,H2BC18,H3C13
1_Member	Reactome Gene Sets	R-HSA-110328	Recognition and association of DNA glycosylase with site containing an affected pyrimidine	-34.5692	-31.9318	30/61	3012,3013,3017,3018,8294,8331,8334,8335,8338,8340,8341,8342,8345,8348,8349,8359,8360,8361,8362,8363,8364,8365,8366,8367,8368,8970,85236,121504,128312,252969	H2AC8,H2AC7,H2BC5,H2BC3,H4C9,H2AC14,H2AC6,H2AC4,H2AC20,H2BC13,H2BC15,H2BC14,H2BC9,H2BC17,H2BC21,H4C1,H4C4,H4C6,H4C12,H4C11,H4C3,H4C8,H4C2,H4C5,H4C13,H2BC11,H2BC12,H4-16,H2BU1,NEIL2
1_Member	Reactome Gene Sets	R-HSA-110329	Cleavage of the damaged pyrimidine	-34.5692	-31.9318	30/61	3012,3013,3017,3018,8294,8331,8334,8335,8338,8340,8341,8342,8345,8348,8349,8359,8360,8361,8362,8363,8364,8365,8366,8367,8368,8970,85236,121504,128312,252969	H2AC8,H2AC7,H2BC5,H2BC3,H4C9,H2AC14,H2AC6,H2AC4,H2AC20,H2BC13,H2BC15,H2BC14,H2BC9,H2BC17,H2BC21,H4C1,H4C4,H4C6,H4C12,H4C11,H4C3,H4C8,H4C2,H4C5,H4C13,H2BC11,H2BC12,H4-16,H2BU1,NEIL2
1_Member	Reactome Gene Sets	R-HSA-73928	Depyrimidination	-34.5692	-31.9318	30/61	3012,3013,3017,3018,8294,8331,8334,8335,8338,8340,8341,8342,8345,8348,8349,8359,8360,8361,8362,8363,8364,8365,8366,8367,8368,8970,85236,121504,128312,252969	H2AC8,H2AC7,H2BC5,H2BC3,H4C9,H2AC14,H2AC6,H2AC4,H2AC20,H2BC13,H2BC15,H2BC14,H2BC9,H2BC17,H2BC21,H4C1,H4C4,H4C6,H4C12,H4C11,H4C3,H4C8,H4C2,H4C5,H4C13,H2BC11,H2BC12,H4-16,H2BU1,NEIL2
1_Member	Reactome Gene Sets	R-HSA-68875	Mitotic Prophase	-34.3396	-31.7103	40/142	3012,3013,3017,3018,8294,8331,8334,8335,8338,8340,8341,8342,8345,8348,8349,8350,8351,8352,8353,8354,8355,8356,8357,8358,8359,8360,8361,8362,8363,8364,8365,8366,8367,8368,8968,8970,85236,121504,128312,653604	H2AC8,H2AC7,H2BC5,H2BC3,H4C9,H2AC14,H2AC6,H2AC4,H2AC20,H2BC13,H2BC15,H2BC14,H2BC9,H2BC17,H2BC21,H3C1,H3C4,H3C3,H3C6,H3C11,H3C8,H3C12,H3C10,H3C2,H4C1,H4C4,H4C6,H4C12,H4C11,H4C3,H4C8,H4C2,H4C5,H4C13,H3C7,H2BC11,H2BC12,H4-16,H2BU1,H3C13
1_Member	Reactome Gene Sets	R-HSA-110330	Recognition and association of DNA glycosylase with site containing an affected purine	-34.3018	-31.696	29/56	3012,3013,3017,3018,8294,8331,8334,8335,8338,8340,8341,8342,8345,8348,8349,8359,8360,8361,8362,8363,8364,8365,8366,8367,8368,8970,85236,121504,128312	H2AC8,H2AC7,H2BC5,H2BC3,H4C9,H2AC14,H2AC6,H2AC4,H2AC20,H2BC13,H2BC15,H2BC14,H2BC9,H2BC17,H2BC21,H4C1,H4C4,H4C6,H4C12,H4C11,H4C3,H4C8,H4C2,H4C5,H4C13,H2BC11,H2BC12,H4-16,H2BU1
1_Member	Reactome Gene Sets	R-HSA-110331	Cleavage of the damaged purine	-34.3018	-31.696	29/56	3012,3013,3017,3018,8294,8331,8334,8335,8338,8340,8341,8342,8345,8348,8349,8359,8360,8361,8362,8363,8364,8365,8366,8367,8368,8970,85236,121504,128312	H2AC8,H2AC7,H2BC5,H2BC3,H4C9,H2AC14,H2AC6,H2AC4,H2AC20,H2BC13,H2BC15,H2BC14,H2BC9,H2BC17,H2BC21,H4C1,H4C4,H4C6,H4C12,H4C11,H4C3,H4C8,H4C2,H4C5,H4C13,H2BC11,H2BC12,H4-16,H2BU1
1_Member	Reactome Gene Sets	R-HSA-73927	Depurination	-34.3018	-31.696	29/56	3012,3013,3017,3018,8294,8331,8334,8335,8338,8340,8341,8342,8345,8348,8349,8359,8360,8361,8362,8363,8364,8365,8366,8367,8368,8970,85236,121504,128312	H2AC8,H2AC7,H2BC5,H2BC3,H4C9,H2AC14,H2AC6,H2AC4,H2AC20,H2BC13,H2BC15,H2BC14,H2BC9,H2BC17,H2BC21,H4C1,H4C4,H4C6,H4C12,H4C11,H4C3,H4C8,H4C2,H4C5,H4C13,H2BC11,H2BC12,H4-16,H2BU1
1_Member	Reactome Gene Sets	R-HSA-73929	Base-Excision Repair, AP Site Formation	-34.0168	-31.4185	30/63	3012,3013,3017,3018,8294,8331,8334,8335,8338,8340,8341,8342,8345,8348,8349,8359,8360,8361,8362,8363,8364,8365,8366,8367,8368,8970,85236,121504,128312,252969	H2AC8,H2AC7,H2BC5,H2BC3,H4C9,H2AC14,H2AC6,H2AC4,H2AC20,H2BC13,H2BC15,H2BC14,H2BC9,H2BC17,H2BC21,H4C1,H4C4,H4C6,H4C12,H4C11,H4C3,H4C8,H4C2,H4C5,H4C13,H2BC11,H2BC12,H4-16,H2BU1,NEIL2
1_Member	GO Biological Processes	GO:0006333	chromatin assembly or disassembly	-33.1629	-30.572	45/207	3006,3007,3008,3009,3017,3018,7157,8091,8294,8340,8341,8342,8345,8348,8349,8350,8351,8352,8353,8354,8355,8356,8357,8358,8359,8360,8361,8362,8363,8364,8365,8366,8367,8368,8968,8970,55506,80312,85236,92815,121504,128312,201161,440689,653604	H1-2,H1-3,H1-4,H1-5,H2BC5,H2BC3,TP53,HMGA2,H4C9,H2BC13,H2BC15,H2BC14,H2BC9,H2BC17,H2BC21,H3C1,H3C4,H3C3,H3C6,H3C11,H3C8,H3C12,H3C10,H3C2,H4C1,H4C4,H4C6,H4C12,H4C11,H4C3,H4C8,H4C2,H4C5,H4C13,H3C7,H2BC11,MACROH2A2,TET1,H2BC12,H2AW,H4-16,H2BU1,CENPV,H2BC18,H3C13
1_Member	Reactome Gene Sets	R-HSA-3247509	Chromatin modifying enzymes	-32.9391	-30.3627	50/274	3012,3013,3017,3018,8242,8294,8329,8330,8331,8332,8334,8335,8336,8338,8340,8341,8342,8345,8348,8349,8350,8351,8352,8353,8354,8355,8356,8357,8358,8359,8360,8361,8362,8363,8364,8365,8366,8367,8368,8968,8969,8970,85235,85236,92815,121504,128312,317772,440689,653604	H2AC8,H2AC7,H2BC5,H2BC3,KDM5C,H4C9,H2AC13,H2AC15,H2AC14,H2AC16,H2AC6,H2AC4,H2AC17,H2AC20,H2BC13,H2BC15,H2BC14,H2BC9,H2BC17,H2BC21,H3C1,H3C4,H3C3,H3C6,H3C11,H3C8,H3C12,H3C10,H3C2,H4C1,H4C4,H4C6,H4C12,H4C11,H4C3,H4C8,H4C2,H4C5,H4C13,H3C7,H2AC11,H2BC11,H2AC12,H2BC12,H2AW,H4-16,H2BU1,H2AC21,H2BC18,H3C13
1_Member	Reactome Gene Sets	R-HSA-4839726	Chromatin organization	-32.9391	-30.3627	50/274	3012,3013,3017,3018,8242,8294,8329,8330,8331,8332,8334,8335,8336,8338,8340,8341,8342,8345,8348,8349,8350,8351,8352,8353,8354,8355,8356,8357,8358,8359,8360,8361,8362,8363,8364,8365,8366,8367,8368,8968,8969,8970,85235,85236,92815,121504,128312,317772,440689,653604	H2AC8,H2AC7,H2BC5,H2BC3,KDM5C,H4C9,H2AC13,H2AC15,H2AC14,H2AC16,H2AC6,H2AC4,H2AC17,H2AC20,H2BC13,H2BC15,H2BC14,H2BC9,H2BC17,H2BC21,H3C1,H3C4,H3C3,H3C6,H3C11,H3C8,H3C12,H3C10,H3C2,H4C1,H4C4,H4C6,H4C12,H4C11,H4C3,H4C8,H4C2,H4C5,H4C13,H3C7,H2AC11,H2BC11,H2AC12,H2BC12,H2AW,H4-16,H2BU1,H2AC21,H2BC18,H3C13
1_Member	GO Biological Processes	GO:0034728	nucleosome organization	-32.5263	-29.9569	41/167	3006,3007,3008,3009,3017,3018,8294,8340,8341,8342,8345,8348,8349,8350,8351,8352,8353,8354,8355,8356,8357,8358,8359,8360,8361,8362,8363,8364,8365,8366,8367,8368,8968,8970,55506,85236,92815,121504,128312,440689,653604	H1-2,H1-3,H1-4,H1-5,H2BC5,H2BC3,H4C9,H2BC13,H2BC15,H2BC14,H2BC9,H2BC17,H2BC21,H3C1,H3C4,H3C3,H3C6,H3C11,H3C8,H3C12,H3C10,H3C2,H4C1,H4C4,H4C6,H4C12,H4C11,H4C3,H4C8,H4C2,H4C5,H4C13,H3C7,H2BC11,MACROH2A2,H2BC12,H2AW,H4-16,H2BU1,H2BC18,H3C13
1_Member	Reactome Gene Sets	R-HSA-201681	TCF dependent signaling in response to WNT	-31.9086	-29.3462	46/233	1454,2535,3012,3013,3017,3018,6657,7474,8294,8331,8334,8335,8338,8340,8341,8342,8345,8348,8349,8350,8351,8352,8353,8354,8355,8356,8357,8358,8359,8360,8361,8362,8363,8364,8365,8366,8367,8368,8549,8968,8970,55553,85236,121504,128312,653604	CSNK1E,FZD2,H2AC8,H2AC7,H2BC5,H2BC3,SOX2,WNT5A,H4C9,H2AC14,H2AC6,H2AC4,H2AC20,H2BC13,H2BC15,H2BC14,H2BC9,H2BC17,H2BC21,H3C1,H3C4,H3C3,H3C6,H3C11,H3C8,H3C12,H3C10,H3C2,H4C1,H4C4,H4C6,H4C12,H4C11,H4C3,H4C8,H4C2,H4C5,H4C13,LGR5,H3C7,H2BC11,SOX6,H2BC12,H4-16,H2BU1,H3C13
1_Member	Reactome Gene Sets	R-HSA-9670095	Inhibition of DNA recombination at telomere	-31.1255	-28.57	29/68	3012,3013,3017,3018,8294,8331,8334,8335,8338,8340,8341,8342,8345,8348,8349,8359,8360,8361,8362,8363,8364,8365,8366,8367,8368,8970,85236,121504,128312	H2AC8,H2AC7,H2BC5,H2BC3,H4C9,H2AC14,H2AC6,H2AC4,H2AC20,H2BC13,H2BC15,H2BC14,H2BC9,H2BC17,H2BC21,H4C1,H4C4,H4C6,H4C12,H4C11,H4C3,H4C8,H4C2,H4C5,H4C13,H2BC11,H2BC12,H4-16,H2BU1
1_Member	Reactome Gene Sets	R-HSA-157118	Signaling by NOTCH	-30.5277	-27.9789	45/236	3012,3013,3017,3018,3714,7157,8294,8331,8334,8335,8338,8340,8341,8342,8345,8348,8349,8350,8351,8352,8353,8354,8355,8356,8357,8358,8359,8360,8361,8362,8363,8364,8365,8366,8367,8368,8788,8968,8970,26523,85236,121504,128312,388585,653604	H2AC8,H2AC7,H2BC5,H2BC3,JAG2,TP53,H4C9,H2AC14,H2AC6,H2AC4,H2AC20,H2BC13,H2BC15,H2BC14,H2BC9,H2BC17,H2BC21,H3C1,H3C4,H3C3,H3C6,H3C11,H3C8,H3C12,H3C10,H3C2,H4C1,H4C4,H4C6,H4C12,H4C11,H4C3,H4C8,H4C2,H4C5,H4C13,DLK1,H3C7,H2BC11,AGO1,H2BC12,H4-16,H2BU1,HES5,H3C13
1_Member	Reactome Gene Sets	R-HSA-8939211	ESR-mediated signaling	-30.5192	-27.9771	44/223	1839,2353,2354,3012,3013,3017,3018,8294,8331,8334,8335,8338,8340,8341,8342,8345,8348,8349,8350,8351,8352,8353,8354,8355,8356,8357,8358,8359,8360,8361,8362,8363,8364,8365,8366,8367,8368,8968,8970,26523,85236,121504,128312,653604	HBEGF,FOS,FOSB,H2AC8,H2AC7,H2BC5,H2BC3,H4C9,H2AC14,H2AC6,H2AC4,H2AC20,H2BC13,H2BC15,H2BC14,H2BC9,H2BC17,H2BC21,H3C1,H3C4,H3C3,H3C6,H3C11,H3C8,H3C12,H3C10,H3C2,H4C1,H4C4,H4C6,H4C12,H4C11,H4C3,H4C8,H4C2,H4C5,H4C13,H3C7,H2BC11,AGO1,H2BC12,H4-16,H2BU1,H3C13
1_Member	Reactome Gene Sets	R-HSA-1221632	Meiotic synapsis	-30.3326	-27.7969	30/79	3012,3013,3017,3018,8294,8331,8334,8335,8338,8340,8341,8342,8345,8348,8349,8359,8360,8361,8362,8363,8364,8365,8366,8367,8368,8970,23224,85236,121504,128312	H2AC8,H2AC7,H2BC5,H2BC3,H4C9,H2AC14,H2AC6,H2AC4,H2AC20,H2BC13,H2BC15,H2BC14,H2BC9,H2BC17,H2BC21,H4C1,H4C4,H4C6,H4C12,H4C11,H4C3,H4C8,H4C2,H4C5,H4C13,H2BC11,SYNE2,H2BC12,H4-16,H2BU1
1_Member	GO Biological Processes	GO:0006335	DNA replication-dependent nucleosome assembly	-30.1071	-27.5842	22/32	8294,8350,8351,8352,8353,8354,8355,8356,8357,8358,8359,8360,8361,8362,8363,8364,8365,8366,8367,8368,8968,121504	H4C9,H3C1,H3C4,H3C3,H3C6,H3C11,H3C8,H3C12,H3C10,H3C2,H4C1,H4C4,H4C6,H4C12,H4C11,H4C3,H4C8,H4C2,H4C5,H4C13,H3C7,H4-16
1_Member	GO Biological Processes	GO:0034723	DNA replication-dependent nucleosome organization	-30.1071	-27.5842	22/32	8294,8350,8351,8352,8353,8354,8355,8356,8357,8358,8359,8360,8361,8362,8363,8364,8365,8366,8367,8368,8968,121504	H4C9,H3C1,H3C4,H3C3,H3C6,H3C11,H3C8,H3C12,H3C10,H3C2,H4C1,H4C4,H4C6,H4C12,H4C11,H4C3,H4C8,H4C2,H4C5,H4C13,H3C7,H4-16
1_Member	GO Biological Processes	GO:0006323	DNA packaging	-30.0026	-27.486	44/229	3006,3007,3008,3009,3017,3018,7157,8091,8294,8340,8341,8342,8345,8348,8349,8350,8351,8352,8353,8354,8355,8356,8357,8358,8359,8360,8361,8362,8363,8364,8365,8366,8367,8368,8968,8970,55506,80312,85236,121504,128312,201161,440689,653604	H1-2,H1-3,H1-4,H1-5,H2BC5,H2BC3,TP53,HMGA2,H4C9,H2BC13,H2BC15,H2BC14,H2BC9,H2BC17,H2BC21,H3C1,H3C4,H3C3,H3C6,H3C11,H3C8,H3C12,H3C10,H3C2,H4C1,H4C4,H4C6,H4C12,H4C11,H4C3,H4C8,H4C2,H4C5,H4C13,H3C7,H2BC11,MACROH2A2,TET1,H2BC12,H4-16,H2BU1,CENPV,H2BC18,H3C13
1_Member	Reactome Gene Sets	R-HSA-606279	Deposition of new CENPA-containing nucleosomes at the centromere	-29.8155	-27.3111	29/74	3012,3013,3017,3018,8294,8331,8334,8335,8338,8340,8341,8342,8345,8348,8349,8359,8360,8361,8362,8363,8364,8365,8366,8367,8368,8970,85236,121504,128312	H2AC8,H2AC7,H2BC5,H2BC3,H4C9,H2AC14,H2AC6,H2AC4,H2AC20,H2BC13,H2BC15,H2BC14,H2BC9,H2BC17,H2BC21,H4C1,H4C4,H4C6,H4C12,H4C11,H4C3,H4C8,H4C2,H4C5,H4C13,H2BC11,H2BC12,H4-16,H2BU1
1_Member	Reactome Gene Sets	R-HSA-774815	Nucleosome assembly	-29.8155	-27.3111	29/74	3012,3013,3017,3018,8294,8331,8334,8335,8338,8340,8341,8342,8345,8348,8349,8359,8360,8361,8362,8363,8364,8365,8366,8367,8368,8970,85236,121504,128312	H2AC8,H2AC7,H2BC5,H2BC3,H4C9,H2AC14,H2AC6,H2AC4,H2AC20,H2BC13,H2BC15,H2BC14,H2BC9,H2BC17,H2BC21,H4C1,H4C4,H4C6,H4C12,H4C11,H4C3,H4C8,H4C2,H4C5,H4C13,H2BC11,H2BC12,H4-16,H2BU1
1_Member	GO Biological Processes	GO:0065004	protein-DNA complex assembly	-29.3969	-26.8985	42/210	3006,3007,3008,3009,3017,3018,7157,8294,8340,8341,8342,8345,8348,8349,8350,8351,8352,8353,8354,8355,8356,8357,8358,8359,8360,8361,8362,8363,8364,8365,8366,8367,8368,8968,8970,55506,85236,121504,128312,201161,440689,653604	H1-2,H1-3,H1-4,H1-5,H2BC5,H2BC3,TP53,H4C9,H2BC13,H2BC15,H2BC14,H2BC9,H2BC17,H2BC21,H3C1,H3C4,H3C3,H3C6,H3C11,H3C8,H3C12,H3C10,H3C2,H4C1,H4C4,H4C6,H4C12,H4C11,H4C3,H4C8,H4C2,H4C5,H4C13,H3C7,H2BC11,MACROH2A2,H2BC12,H4-16,H2BU1,CENPV,H2BC18,H3C13
1_Member	Reactome Gene Sets	R-HSA-195721	Signaling by WNT	-28.8314	-26.3389	50/332	1454,2535,3012,3013,3017,3018,5158,6657,7474,7482,8294,8331,8334,8335,8338,8340,8341,8342,8345,8348,8349,8350,8351,8352,8353,8354,8355,8356,8357,8358,8359,8360,8361,8362,8363,8364,8365,8366,8367,8368,8549,8968,8970,23236,26523,55553,85236,121504,128312,653604	CSNK1E,FZD2,H2AC8,H2AC7,H2BC5,H2BC3,PDE6B,SOX2,WNT5A,WNT2B,H4C9,H2AC14,H2AC6,H2AC4,H2AC20,H2BC13,H2BC15,H2BC14,H2BC9,H2BC17,H2BC21,H3C1,H3C4,H3C3,H3C6,H3C11,H3C8,H3C12,H3C10,H3C2,H4C1,H4C4,H4C6,H4C12,H4C11,H4C3,H4C8,H4C2,H4C5,H4C13,LGR5,H3C7,H2BC11,PLCB1,AGO1,SOX6,H2BC12,H4-16,H2BU1,H3C13
1_Member	Reactome Gene Sets	R-HSA-8878171	Transcriptional regulation by RUNX1	-28.089	-25.6024	43/239	1021,3012,3013,3017,3018,8294,8331,8334,8335,8338,8340,8341,8342,8345,8348,8349,8350,8351,8352,8353,8354,8355,8356,8357,8358,8359,8360,8361,8362,8363,8364,8365,8366,8367,8368,8968,8970,9021,26523,85236,121504,128312,653604	CDK6,H2AC8,H2AC7,H2BC5,H2BC3,H4C9,H2AC14,H2AC6,H2AC4,H2AC20,H2BC13,H2BC15,H2BC14,H2BC9,H2BC17,H2BC21,H3C1,H3C4,H3C3,H3C6,H3C11,H3C8,H3C12,H3C10,H3C2,H4C1,H4C4,H4C6,H4C12,H4C11,H4C3,H4C8,H4C2,H4C5,H4C13,H3C7,H2BC11,SOCS3,AGO1,H2BC12,H4-16,H2BU1,H3C13
1_Member	Reactome Gene Sets	R-HSA-73884	Base Excision Repair	-28.0046	-25.5237	30/92	3012,3013,3017,3018,8294,8331,8334,8335,8338,8340,8341,8342,8345,8348,8349,8359,8360,8361,8362,8363,8364,8365,8366,8367,8368,8970,85236,121504,128312,252969	H2AC8,H2AC7,H2BC5,H2BC3,H4C9,H2AC14,H2AC6,H2AC4,H2AC20,H2BC13,H2BC15,H2BC14,H2BC9,H2BC17,H2BC21,H4C1,H4C4,H4C6,H4C12,H4C11,H4C3,H4C8,H4C2,H4C5,H4C13,H2BC11,H2BC12,H4-16,H2BU1,NEIL2
1_Member	Reactome Gene Sets	R-HSA-9006931	Signaling by Nuclear Receptors	-27.9582	-25.483	47/299	1839,2194,2353,2354,3012,3013,3017,3018,5959,8294,8331,8334,8335,8338,8340,8341,8342,8345,8348,8349,8350,8351,8352,8353,8354,8355,8356,8357,8358,8359,8360,8361,8362,8363,8364,8365,8366,8367,8368,8968,8970,26523,57665,85236,121504,128312,653604	HBEGF,FASN,FOS,FOSB,H2AC8,H2AC7,H2BC5,H2BC3,RDH5,H4C9,H2AC14,H2AC6,H2AC4,H2AC20,H2BC13,H2BC15,H2BC14,H2BC9,H2BC17,H2BC21,H3C1,H3C4,H3C3,H3C6,H3C11,H3C8,H3C12,H3C10,H3C2,H4C1,H4C4,H4C6,H4C12,H4C11,H4C3,H4C8,H4C2,H4C5,H4C13,H3C7,H2BC11,AGO1,RDH14,H2BC12,H4-16,H2BU1,H3C13
1_Member	Reactome Gene Sets	R-HSA-3214842	HDMs demethylate histones	-27.4161	-24.9465	24/50	8242,8294,8350,8351,8352,8353,8354,8355,8356,8357,8358,8359,8360,8361,8362,8363,8364,8365,8366,8367,8368,8968,121504,653604	KDM5C,H4C9,H3C1,H3C4,H3C3,H3C6,H3C11,H3C8,H3C12,H3C10,H3C2,H4C1,H4C4,H4C6,H4C12,H4C11,H4C3,H4C8,H4C2,H4C5,H4C13,H3C7,H4-16,H3C13
1_Member	GO Biological Processes	GO:0071824	protein-DNA complex subunit organization	-27.2517	-24.7876	43/250	3006,3007,3008,3009,3017,3018,7157,8294,8340,8341,8342,8345,8348,8349,8350,8351,8352,8353,8354,8355,8356,8357,8358,8359,8360,8361,8362,8363,8364,8365,8366,8367,8368,8968,8970,55506,85236,92815,121504,128312,201161,440689,653604	H1-2,H1-3,H1-4,H1-5,H2BC5,H2BC3,TP53,H4C9,H2BC13,H2BC15,H2BC14,H2BC9,H2BC17,H2BC21,H3C1,H3C4,H3C3,H3C6,H3C11,H3C8,H3C12,H3C10,H3C2,H4C1,H4C4,H4C6,H4C12,H4C11,H4C3,H4C8,H4C2,H4C5,H4C13,H3C7,H2BC11,MACROH2A2,H2BC12,H2AW,H4-16,H2BU1,CENPV,H2BC18,H3C13
1_Member	Reactome Gene Sets	R-HSA-8953897	Cellular responses to stimuli	-25.6165	-23.1579	69/771	1021,1465,1968,2353,2936,3006,3007,3008,3009,3012,3013,3017,3018,3304,4193,4217,5600,6170,6171,6218,6228,7157,8091,8294,8331,8334,8335,8338,8340,8341,8342,8345,8348,8349,8350,8351,8352,8353,8354,8355,8356,8357,8358,8359,8360,8361,8362,8363,8364,8365,8366,8367,8368,8968,8970,8994,9997,26523,51241,85236,112398,116228,121504,128312,155066,347733,440275,652968,653604	CDK6,CSRP1,EIF2S3,FOS,GSR,H1-2,H1-3,H1-4,H1-5,H2AC8,H2AC7,H2BC5,H2BC3,HSPA1B,MDM2,MAP3K5,MAPK11,RPL39,RPL41,RPS17,RPS23,TP53,HMGA2,H4C9,H2AC14,H2AC6,H2AC4,H2AC20,H2BC13,H2BC15,H2BC14,H2BC9,H2BC17,H2BC21,H3C1,H3C4,H3C3,H3C6,H3C11,H3C8,H3C12,H3C10,H3C2,H4C1,H4C4,H4C6,H4C12,H4C11,H4C3,H4C8,H4C2,H4C5,H4C13,H3C7,H2BC11,LIMD1,SCO2,AGO1,COX16,H2BC12,EGLN2,COX20,H4-16,H2BU1,ATP6V0E2,TUBB2B,EIF2AK4,CASTOR…
1_Member	Reactome Gene Sets	R-HSA-2262752	Cellular responses to stress	-25.3345	-22.8812	68/757	1021,1968,2353,2936,3006,3007,3008,3009,3012,3013,3017,3018,3304,4193,4217,5600,6170,6171,6218,6228,7157,8091,8294,8331,8334,8335,8338,8340,8341,8342,8345,8348,8349,8350,8351,8352,8353,8354,8355,8356,8357,8358,8359,8360,8361,8362,8363,8364,8365,8366,8367,8368,8968,8970,8994,9997,26523,51241,85236,112398,116228,121504,128312,155066,347733,440275,652968,653604	CDK6,EIF2S3,FOS,GSR,H1-2,H1-3,H1-4,H1-5,H2AC8,H2AC7,H2BC5,H2BC3,HSPA1B,MDM2,MAP3K5,MAPK11,RPL39,RPL41,RPS17,RPS23,TP53,HMGA2,H4C9,H2AC14,H2AC6,H2AC4,H2AC20,H2BC13,H2BC15,H2BC14,H2BC9,H2BC17,H2BC21,H3C1,H3C4,H3C3,H3C6,H3C11,H3C8,H3C12,H3C10,H3C2,H4C1,H4C4,H4C6,H4C12,H4C11,H4C3,H4C8,H4C2,H4C5,H4C13,H3C7,H2BC11,LIMD1,SCO2,AGO1,COX16,H2BC12,EGLN2,COX20,H4-16,H2BU1,ATP6V0E2,TUBB2B,EIF2AK4,CASTOR1,H3C13
1_Member	Reactome Gene Sets	R-HSA-195258	RHO GTPase Effectors	-24.2851	-21.8372	45/327	388,3012,3013,3017,3018,4771,5600,8294,8331,8334,8335,8338,8340,8341,8342,8345,8348,8349,8350,8351,8352,8353,8354,8355,8356,8357,8358,8359,8360,8361,8362,8363,8364,8365,8366,8367,8368,8968,8970,30851,85236,121504,128312,347733,653604	RHOB,H2AC8,H2AC7,H2BC5,H2BC3,NF2,MAPK11,H4C9,H2AC14,H2AC6,H2AC4,H2AC20,H2BC13,H2BC15,H2BC14,H2BC9,H2BC17,H2BC21,H3C1,H3C4,H3C3,H3C6,H3C11,H3C8,H3C12,H3C10,H3C2,H4C1,H4C4,H4C6,H4C12,H4C11,H4C3,H4C8,H4C2,H4C5,H4C13,H3C7,H2BC11,TAX1BP3,H2BC12,H4-16,H2BU1,TUBB2B,H3C13
1_Member	GO Biological Processes	GO:0071103	DNA conformation change	-23.7933	-21.3506	44/319	3006,3007,3008,3009,3017,3018,7157,8091,8294,8340,8341,8342,8345,8348,8349,8350,8351,8352,8353,8354,8355,8356,8357,8358,8359,8360,8361,8362,8363,8364,8365,8366,8367,8368,8968,8970,55506,80312,85236,121504,128312,201161,440689,653604	H1-2,H1-3,H1-4,H1-5,H2BC5,H2BC3,TP53,HMGA2,H4C9,H2BC13,H2BC15,H2BC14,H2BC9,H2BC17,H2BC21,H3C1,H3C4,H3C3,H3C6,H3C11,H3C8,H3C12,H3C10,H3C2,H4C1,H4C4,H4C6,H4C12,H4C11,H4C3,H4C8,H4C2,H4C5,H4C13,H3C7,H2BC11,MACROH2A2,TET1,H2BC12,H4-16,H2BU1,CENPV,H2BC18,H3C13
1_Member	Reactome Gene Sets	R-HSA-157579	Telomere Maintenance	-23.7335	-21.2961	29/113	3012,3013,3017,3018,8294,8331,8334,8335,8338,8340,8341,8342,8345,8348,8349,8359,8360,8361,8362,8363,8364,8365,8366,8367,8368,8970,85236,121504,128312	H2AC8,H2AC7,H2BC5,H2BC3,H4C9,H2AC14,H2AC6,H2AC4,H2AC20,H2BC13,H2BC15,H2BC14,H2BC9,H2BC17,H2BC21,H4C1,H4C4,H4C6,H4C12,H4C11,H4C3,H4C8,H4C2,H4C5,H4C13,H2BC11,H2BC12,H4-16,H2BU1
1_Member	Reactome Gene Sets	R-HSA-5693565	Recruitment and ATM-mediated phosphorylation of repair and signaling proteins at DNA double strand breaks	-23.3703	-20.938	25/77	2140,3017,3018,7157,8294,8340,8341,8342,8345,8348,8349,8359,8360,8361,8362,8363,8364,8365,8366,8367,8368,8970,85236,121504,128312	EYA3,H2BC5,H2BC3,TP53,H4C9,H2BC13,H2BC15,H2BC14,H2BC9,H2BC17,H2BC21,H4C1,H4C4,H4C6,H4C12,H4C11,H4C3,H4C8,H4C2,H4C5,H4C13,H2BC11,H2BC12,H4-16,H2BU1
1_Member	Reactome Gene Sets	R-HSA-5693606	DNA Double Strand Break Response	-23.2103	-20.7831	25/78	2140,3017,3018,7157,8294,8340,8341,8342,8345,8348,8349,8359,8360,8361,8362,8363,8364,8365,8366,8367,8368,8970,85236,121504,128312	EYA3,H2BC5,H2BC3,TP53,H4C9,H2BC13,H2BC15,H2BC14,H2BC9,H2BC17,H2BC21,H4C1,H4C4,H4C6,H4C12,H4C11,H4C3,H4C8,H4C2,H4C5,H4C13,H2BC11,H2BC12,H4-16,H2BU1
1_Member	Reactome Gene Sets	R-HSA-5693571	Nonhomologous End-Joining (NHEJ)	-21.8472	-19.425	23/69	3017,3018,8294,8340,8341,8342,8345,8348,8349,8359,8360,8361,8362,8363,8364,8365,8366,8367,8368,8970,85236,121504,128312	H2BC5,H2BC3,H4C9,H2BC13,H2BC15,H2BC14,H2BC9,H2BC17,H2BC21,H4C1,H4C4,H4C6,H4C12,H4C11,H4C3,H4C8,H4C2,H4C5,H4C13,H2BC11,H2BC12,H4-16,H2BU1
1_Member	WikiPathways	WP2369	Histone modifications	-21.682	-19.2648	23/70	8294,8350,8351,8352,8353,8354,8355,8356,8357,8358,8359,8360,8361,8362,8363,8364,8365,8366,8367,8368,8968,121504,653604	H4C9,H3C1,H3C4,H3C3,H3C6,H3C11,H3C8,H3C12,H3C10,H3C2,H4C1,H4C4,H4C6,H4C12,H4C11,H4C3,H4C8,H4C2,H4C5,H4C13,H3C7,H4-16,H3C13
1_Member	Reactome Gene Sets	R-HSA-3214841	PKMTs methylate histone lysines	-21.5198	-19.1075	23/71	8294,8350,8351,8352,8353,8354,8355,8356,8357,8358,8359,8360,8361,8362,8363,8364,8365,8366,8367,8368,8968,121504,653604	H4C9,H3C1,H3C4,H3C3,H3C6,H3C11,H3C8,H3C12,H3C10,H3C2,H4C1,H4C4,H4C6,H4C12,H4C11,H4C3,H4C8,H4C2,H4C5,H4C13,H3C7,H4-16,H3C13
1_Member	Reactome Gene Sets	R-HSA-73886	Chromosome Maintenance	-20.7975	-18.39	29/141	3012,3013,3017,3018,8294,8331,8334,8335,8338,8340,8341,8342,8345,8348,8349,8359,8360,8361,8362,8363,8364,8365,8366,8367,8368,8970,85236,121504,128312	H2AC8,H2AC7,H2BC5,H2BC3,H4C9,H2AC14,H2AC6,H2AC4,H2AC20,H2BC13,H2BC15,H2BC14,H2BC9,H2BC17,H2BC21,H4C1,H4C4,H4C6,H4C12,H4C11,H4C3,H4C8,H4C2,H4C5,H4C13,H2BC11,H2BC12,H4-16,H2BU1
1_Member	Reactome Gene Sets	R-HSA-194315	Signaling by Rho GTPases	-20.3722	-17.9695	59/707	388,613,1969,2802,3012,3013,3017,3018,3728,4771,5600,8294,8331,8334,8335,8338,8340,8341,8342,8345,8348,8349,8350,8351,8352,8353,8354,8355,8356,8357,8358,8359,8360,8361,8362,8363,8364,8365,8366,8367,8368,8968,8970,23370,23616,30851,50619,55200,57679,64283,84144,84364,85236,90627,121504,128312,153478,347733,653604	RHOB,BCR,EPHA2,GOLGA3,H2AC8,H2AC7,H2BC5,H2BC3,JUP,NF2,MAPK11,H4C9,H2AC14,H2AC6,H2AC4,H2AC20,H2BC13,H2BC15,H2BC14,H2BC9,H2BC17,H2BC21,H3C1,H3C4,H3C3,H3C6,H3C11,H3C8,H3C12,H3C10,H3C2,H4C1,H4C4,H4C6,H4C12,H4C11,H4C3,H4C8,H4C2,H4C5,H4C13,H3C7,H2BC11,ARHGEF18,SH3BP1,TAX1BP3,DEF6,PLEKHG6,ALS2,ARHGEF28,SYDE2,ARFGAP2,H2BC12,STARD13,H4-16,H2BU1,PLEKHG4B,TUBB2B,H3C13
1_Member	Reactome Gene Sets	R-HSA-9716542	Signaling by Rho GTPases, Miro GTPases and RHOBTB3	-19.8962	-17.4983	59/723	388,613,1969,2802,3012,3013,3017,3018,3728,4771,5600,8294,8331,8334,8335,8338,8340,8341,8342,8345,8348,8349,8350,8351,8352,8353,8354,8355,8356,8357,8358,8359,8360,8361,8362,8363,8364,8365,8366,8367,8368,8968,8970,23370,23616,30851,50619,55200,57679,64283,84144,84364,85236,90627,121504,128312,153478,347733,653604	RHOB,BCR,EPHA2,GOLGA3,H2AC8,H2AC7,H2BC5,H2BC3,JUP,NF2,MAPK11,H4C9,H2AC14,H2AC6,H2AC4,H2AC20,H2BC13,H2BC15,H2BC14,H2BC9,H2BC17,H2BC21,H3C1,H3C4,H3C3,H3C6,H3C11,H3C8,H3C12,H3C10,H3C2,H4C1,H4C4,H4C6,H4C12,H4C11,H4C3,H4C8,H4C2,H4C5,H4C13,H3C7,H2BC11,ARHGEF18,SH3BP1,TAX1BP3,DEF6,PLEKHG6,ALS2,ARHGEF28,SYDE2,ARFGAP2,H2BC12,STARD13,H4-16,H2BU1,PLEKHG4B,TUBB2B,H3C13
1_Member	Reactome Gene Sets	R-HSA-69473	G2/M DNA damage checkpoint	-19.5611	-17.1679	24/95	3017,3018,7157,8294,8340,8341,8342,8345,8348,8349,8359,8360,8361,8362,8363,8364,8365,8366,8367,8368,8970,85236,121504,128312	H2BC5,H2BC3,TP53,H4C9,H2BC13,H2BC15,H2BC14,H2BC9,H2BC17,H2BC21,H4C1,H4C4,H4C6,H4C12,H4C11,H4C3,H4C8,H4C2,H4C5,H4C13,H2BC11,H2BC12,H4-16,H2BU1
1_Member	Reactome Gene Sets	R-HSA-5693607	Processing of DNA double-strand break ends	-17.987	-15.5984	23/98	3017,3018,8294,8340,8341,8342,8345,8348,8349,8359,8360,8361,8362,8363,8364,8365,8366,8367,8368,8970,85236,121504,128312	H2BC5,H2BC3,H4C9,H2BC13,H2BC15,H2BC14,H2BC9,H2BC17,H2BC21,H4C1,H4C4,H4C6,H4C12,H4C11,H4C3,H4C8,H4C2,H4C5,H4C13,H2BC11,H2BC12,H4-16,H2BU1
1_Member	Reactome Gene Sets	R-HSA-68886	M Phase	-17.4645	-15.0806	42/418	1454,3012,3013,3017,3018,8294,8331,8334,8335,8338,8340,8341,8342,8345,8348,8349,8350,8351,8352,8353,8354,8355,8356,8357,8358,8359,8360,8361,8362,8363,8364,8365,8366,8367,8368,8968,8970,85236,121504,128312,347733,653604	CSNK1E,H2AC8,H2AC7,H2BC5,H2BC3,H4C9,H2AC14,H2AC6,H2AC4,H2AC20,H2BC13,H2BC15,H2BC14,H2BC9,H2BC17,H2BC21,H3C1,H3C4,H3C3,H3C6,H3C11,H3C8,H3C12,H3C10,H3C2,H4C1,H4C4,H4C6,H4C12,H4C11,H4C3,H4C8,H4C2,H4C5,H4C13,H3C7,H2BC11,H2BC12,H4-16,H2BU1,TUBB2B,H3C13
1_Member	GO Biological Processes	GO:0045653	negative regulation of megakaryocyte differentiation	-16.3689	-13.9895	12/18	8294,8359,8360,8361,8362,8363,8364,8365,8366,8367,8368,121504	H4C9,H4C1,H4C4,H4C6,H4C12,H4C11,H4C3,H4C8,H4C2,H4C5,H4C13,H4-16
1_Member	KEGG Pathway	ko05203	Viral carcinogenesis	-15.4286	-13.0537	28/201	1021,3017,3018,3661,4193,7157,8294,8340,8341,8342,8345,8348,8349,8359,8360,8361,8362,8363,8364,8365,8366,8367,8368,8970,85236,121504,128312,440689	CDK6,H2BC5,H2BC3,IRF3,MDM2,TP53,H4C9,H2BC13,H2BC15,H2BC14,H2BC9,H2BC17,H2BC21,H4C1,H4C4,H4C6,H4C12,H4C11,H4C3,H4C8,H4C2,H4C5,H4C13,H2BC11,H2BC12,H4-16,H2BU1,H2BC18
1_Member	GO Biological Processes	GO:0032200	telomere organization	-15.0971	-12.7266	25/159	7012,8294,8350,8351,8352,8353,8354,8355,8356,8357,8358,8359,8360,8361,8362,8363,8364,8365,8366,8367,8368,8968,22891,79035,121504	TERC,H4C9,H3C1,H3C4,H3C3,H3C6,H3C11,H3C8,H3C12,H3C10,H3C2,H4C1,H4C4,H4C6,H4C12,H4C11,H4C3,H4C8,H4C2,H4C5,H4C13,H3C7,ZNF365,NABP2,H4-16
1_Member	Reactome Gene Sets	R-HSA-5693567	HDR through Homologous Recombination (HRR) or Single Strand Annealing (SSA)	-14.9436	-12.5775	23/132	3017,3018,8294,8340,8341,8342,8345,8348,8349,8359,8360,8361,8362,8363,8364,8365,8366,8367,8368,8970,85236,121504,128312	H2BC5,H2BC3,H4C9,H2BC13,H2BC15,H2BC14,H2BC9,H2BC17,H2BC21,H4C1,H4C4,H4C6,H4C12,H4C11,H4C3,H4C8,H4C2,H4C5,H4C13,H2BC11,H2BC12,H4-16,H2BU1
1_Member	KEGG Pathway	hsa05203	Viral carcinogenesis	-14.8738	-12.5121	28/211	1021,3017,3018,3661,4193,7157,8294,8340,8341,8342,8345,8348,8349,8359,8360,8361,8362,8363,8364,8365,8366,8367,8368,8970,85236,121504,128312,440689	CDK6,H2BC5,H2BC3,IRF3,MDM2,TP53,H4C9,H2BC13,H2BC15,H2BC14,H2BC9,H2BC17,H2BC21,H4C1,H4C4,H4C6,H4C12,H4C11,H4C3,H4C8,H4C2,H4C5,H4C13,H2BC11,H2BC12,H4-16,H2BU1,H2BC18
1_Member	Reactome Gene Sets	R-HSA-5693532	DNA Double-Strand Break Repair	-14.583	-12.2256	25/167	2140,3017,3018,7157,8294,8340,8341,8342,8345,8348,8349,8359,8360,8361,8362,8363,8364,8365,8366,8367,8368,8970,85236,121504,128312	EYA3,H2BC5,H2BC3,TP53,H4C9,H2BC13,H2BC15,H2BC14,H2BC9,H2BC17,H2BC21,H4C1,H4C4,H4C6,H4C12,H4C11,H4C3,H4C8,H4C2,H4C5,H4C13,H2BC11,H2BC12,H4-16,H2BU1
1_Member	Reactome Gene Sets	R-HSA-5693538	Homology Directed Repair	-14.5057	-12.1526	23/138	3017,3018,8294,8340,8341,8342,8345,8348,8349,8359,8360,8361,8362,8363,8364,8365,8366,8367,8368,8970,85236,121504,128312	H2BC5,H2BC3,H4C9,H2BC13,H2BC15,H2BC14,H2BC9,H2BC17,H2BC21,H4C1,H4C4,H4C6,H4C12,H4C11,H4C3,H4C8,H4C2,H4C5,H4C13,H2BC11,H2BC12,H4-16,H2BU1
1_Member	Reactome Gene Sets	R-HSA-69278	Cell Cycle, Mitotic	-14.2798	-11.9515	44/561	1021,1454,3012,3013,3017,3018,7157,8294,8331,8334,8335,8338,8340,8341,8342,8345,8348,8349,8350,8351,8352,8353,8354,8355,8356,8357,8358,8359,8360,8361,8362,8363,8364,8365,8366,8367,8368,8968,8970,85236,121504,128312,347733,653604	CDK6,CSNK1E,H2AC8,H2AC7,H2BC5,H2BC3,TP53,H4C9,H2AC14,H2AC6,H2AC4,H2AC20,H2BC13,H2BC15,H2BC14,H2BC9,H2BC17,H2BC21,H3C1,H3C4,H3C3,H3C6,H3C11,H3C8,H3C12,H3C10,H3C2,H4C1,H4C4,H4C6,H4C12,H4C11,H4C3,H4C8,H4C2,H4C5,H4C13,H3C7,H2BC11,H2BC12,H4-16,H2BU1,TUBB2B,H3C13
1_Member	Reactome Gene Sets	R-HSA-73894	DNA Repair	-13.5772	-11.2568	33/335	2140,3012,3013,3017,3018,7157,8294,8331,8334,8335,8338,8340,8341,8342,8345,8348,8349,8359,8360,8361,8362,8363,8364,8365,8366,8367,8368,8970,9636,85236,121504,128312,252969	EYA3,H2AC8,H2AC7,H2BC5,H2BC3,TP53,H4C9,H2AC14,H2AC6,H2AC4,H2AC20,H2BC13,H2BC15,H2BC14,H2BC9,H2BC17,H2BC21,H4C1,H4C4,H4C6,H4C12,H4C11,H4C3,H4C8,H4C2,H4C5,H4C13,H2BC11,ISG15,H2BC12,H4-16,H2BU1,NEIL2
1_Member	Reactome Gene Sets	R-HSA-69481	G2/M Checkpoints	-13.5584	-11.2421	24/168	3017,3018,7157,8294,8340,8341,8342,8345,8348,8349,8359,8360,8361,8362,8363,8364,8365,8366,8367,8368,8970,85236,121504,128312	H2BC5,H2BC3,TP53,H4C9,H2BC13,H2BC15,H2BC14,H2BC9,H2BC17,H2BC21,H4C1,H4C4,H4C6,H4C12,H4C11,H4C3,H4C8,H4C2,H4C5,H4C13,H2BC11,H2BC12,H4-16,H2BU1
1_Member	GO Biological Processes	GO:0045652	regulation of megakaryocyte differentiation	-13.1263	-10.8176	13/36	3692,8294,8359,8360,8361,8362,8363,8364,8365,8366,8367,8368,121504	EIF6,H4C9,H4C1,H4C4,H4C6,H4C12,H4C11,H4C3,H4C8,H4C2,H4C5,H4C13,H4-16
1_Member	Reactome Gene Sets	R-HSA-1640170	Cell Cycle	-12.3023	-9.99752	46/692	1021,1454,3012,3013,3017,3018,4193,7157,8294,8331,8334,8335,8338,8340,8341,8342,8345,8348,8349,8350,8351,8352,8353,8354,8355,8356,8357,8358,8359,8360,8361,8362,8363,8364,8365,8366,8367,8368,8968,8970,23224,85236,121504,128312,347733,653604	CDK6,CSNK1E,H2AC8,H2AC7,H2BC5,H2BC3,MDM2,TP53,H4C9,H2AC14,H2AC6,H2AC4,H2AC20,H2BC13,H2BC15,H2BC14,H2BC9,H2BC17,H2BC21,H3C1,H3C4,H3C3,H3C6,H3C11,H3C8,H3C12,H3C10,H3C2,H4C1,H4C4,H4C6,H4C12,H4C11,H4C3,H4C8,H4C2,H4C5,H4C13,H3C7,H2BC11,SYNE2,H2BC12,H4-16,H2BU1,TUBB2B,H3C13
1_Member	GO Biological Processes	GO:0006336	DNA replication-independent nucleosome assembly	-12.2028	-9.90179	12/33	8294,8359,8360,8361,8362,8363,8364,8365,8366,8367,8368,121504	H4C9,H4C1,H4C4,H4C6,H4C12,H4C11,H4C3,H4C8,H4C2,H4C5,H4C13,H4-16
1_Member	GO Biological Processes	GO:0034724	DNA replication-independent nucleosome organization	-12.0214	-9.72417	12/34	8294,8359,8360,8361,8362,8363,8364,8365,8366,8367,8368,121504	H4C9,H4C1,H4C4,H4C6,H4C12,H4C11,H4C3,H4C8,H4C2,H4C5,H4C13,H4-16
1_Member	GO Biological Processes	GO:0030219	megakaryocyte differentiation	-11.481	-9.19114	14/57	3589,3692,8294,8359,8360,8361,8362,8363,8364,8365,8366,8367,8368,121504	IL11,EIF6,H4C9,H4C1,H4C4,H4C6,H4C12,H4C11,H4C3,H4C8,H4C2,H4C5,H4C13,H4-16
1_Member	GO Biological Processes	GO:0045638	negative regulation of myeloid cell differentiation	-10.724	-8.44867	16/90	1021,4831,8294,8359,8360,8361,8362,8363,8364,8365,8366,8367,8368,84959,121504,140685	CDK6,NME2,H4C9,H4C1,H4C4,H4C6,H4C12,H4C11,H4C3,H4C8,H4C2,H4C5,H4C13,UBASH3B,H4-16,ZBTB46
1_Member	GO Biological Processes	GO:0045637	regulation of myeloid cell differentiation	-10.5322	-8.26037	23/211	1021,2353,3304,3692,3976,4286,4831,5600,8294,8359,8360,8361,8362,8363,8364,8365,8366,8367,8368,9636,84959,121504,140685	CDK6,FOS,HSPA1B,EIF6,LIF,MITF,NME2,MAPK11,H4C9,H4C1,H4C4,H4C6,H4C12,H4C11,H4C3,H4C8,H4C2,H4C5,H4C13,ISG15,UBASH3B,H4-16,ZBTB46
1_Member	GO Biological Processes	GO:0030099	myeloid cell differentiation	-9.88594	-7.62114	30/383	652,1021,1969,2194,2353,2539,3304,3589,3692,3976,4286,4831,5600,5613,8294,8359,8360,8361,8362,8363,8364,8365,8366,8367,8368,9258,9636,84959,121504,140685	BMP4,CDK6,EPHA2,FASN,FOS,G6PD,HSPA1B,IL11,EIF6,LIF,MITF,NME2,MAPK11,PRKX,H4C9,H4C1,H4C4,H4C6,H4C12,H4C11,H4C3,H4C8,H4C2,H4C5,H4C13,MFHAS1,ISG15,UBASH3B,H4-16,ZBTB46
1_Member	WikiPathways	WP4657	22q11.2 copy number variation syndrome	-9.29942	-7.03808	18/145	2260,2296,2637,7157,7625,8294,8359,8360,8361,8362,8363,8364,8365,8366,8367,8368,9076,121504	FGFR1,FOXC1,GBX2,TP53,ZNF74,H4C9,H4C1,H4C4,H4C6,H4C12,H4C11,H4C3,H4C8,H4C2,H4C5,H4C13,CLDN1,H4-16
1_Member	Reactome Gene Sets	R-HSA-69620	Cell Cycle Checkpoints	-9.07027	-6.81236	25/294	3017,3018,4193,7157,8294,8340,8341,8342,8345,8348,8349,8359,8360,8361,8362,8363,8364,8365,8366,8367,8368,8970,85236,121504,128312	H2BC5,H2BC3,MDM2,TP53,H4C9,H2BC13,H2BC15,H2BC14,H2BC9,H2BC17,H2BC21,H4C1,H4C4,H4C6,H4C12,H4C11,H4C3,H4C8,H4C2,H4C5,H4C13,H2BC11,H2BC12,H4-16,H2BU1
1_Member	GO Biological Processes	GO:0006352	DNA-templated transcription, initiation	-8.08878	-5.83772	16/134	2975,4286,7157,8294,8359,8360,8361,8362,8363,8364,8365,8366,8367,8368,57106,121504	GTF3C1,MITF,TP53,H4C9,H4C1,H4C4,H4C6,H4C12,H4C11,H4C3,H4C8,H4C2,H4C5,H4C13,NAT14,H4-16
1_Member	GO Biological Processes	GO:0045596	negative regulation of cell differentiation	-8.08549	-5.83772	38/683	652,1021,1630,2301,2539,4133,4831,6608,6657,6664,7042,7157,7474,8200,8294,8359,8360,8361,8362,8363,8364,8365,8366,8367,8368,8994,9355,10683,25819,53335,55079,55553,84959,121504,140685,149041,388585,440275	BMP4,CDK6,DCC,FOXE3,G6PD,MAP2,NME2,SMO,SOX2,SOX11,TGFB2,TP53,WNT5A,GDF5,H4C9,H4C1,H4C4,H4C6,H4C12,H4C11,H4C3,H4C8,H4C2,H4C5,H4C13,LIMD1,LHX2,DLL3,NOCT,BCL11A,FEZF2,SOX6,UBASH3B,H4-16,ZBTB46,RC3H1,HES5,EIF2AK4
1_Member	Reactome Gene Sets	R-HSA-4551638	SUMOylation of chromatin organization proteins	-7.9367	-5.69556	12/71	8294,8359,8360,8361,8362,8363,8364,8365,8366,8367,8368,121504	H4C9,H4C1,H4C4,H4C6,H4C12,H4C11,H4C3,H4C8,H4C2,H4C5,H4C13,H4-16
1_Member	GO Biological Processes	GO:1903706	regulation of hemopoiesis	-7.67329	-5.44192	26/370	652,1021,2353,3304,3692,3976,4286,4831,5600,8294,8359,8360,8361,8362,8363,8364,8365,8366,8367,8368,9636,9760,84959,121504,140685,149041	BMP4,CDK6,FOS,HSPA1B,EIF6,LIF,MITF,NME2,MAPK11,H4C9,H4C1,H4C4,H4C6,H4C12,H4C11,H4C3,H4C8,H4C2,H4C5,H4C13,ISG15,TOX,UBASH3B,H4-16,ZBTB46,RC3H1
1_Member	Reactome Gene Sets	R-HSA-3108232	SUMO E3 ligases SUMOylate target proteins	-5.52183	-3.35878	15/182	4193,4286,7157,8294,8359,8360,8361,8362,8363,8364,8365,8366,8367,8368,121504	MDM2,MITF,TP53,H4C9,H4C1,H4C4,H4C6,H4C12,H4C11,H4C3,H4C8,H4C2,H4C5,H4C13,H4-16
1_Member	Reactome Gene Sets	R-HSA-2990846	SUMOylation	-5.34828	-3.19608	15/188	4193,4286,7157,8294,8359,8360,8361,8362,8363,8364,8365,8366,8367,8368,121504	MDM2,MITF,TP53,H4C9,H4C1,H4C4,H4C6,H4C12,H4C11,H4C3,H4C8,H4C2,H4C5,H4C13,H4-16
2_Summary	GO Biological Processes	GO:0045814	negative regulation of gene expression, epigenetic	-14.4418	-12.0929	19/86	3006,3007,3008,3009,3012,3013,8329,8330,8332,8334,8335,8336,8338,8969,9355,55506,85235,92815,317772,8331,3017,3018,4193,7157,8340,8341,8342,8345,8348,8349,8970,85236,128312,440689,8091,80312,201161,652,3692,5936,6023,8350,8351,8352,8353,8354,8355,8356,8357,8358,8968,8994,9931,10658,23264,26523,407037	H1-2,H1-3,H1-4,H1-5,H2AC8,H2AC7,H2AC13,H2AC15,H2AC16,H2AC6,H2AC4,H2AC17,H2AC20,H2AC11,LHX2,MACROH2A2,H2AC12,H2AW,H2AC21,H2AC14,H2BC5,H2BC3,MDM2,TP53,H2BC13,H2BC15,H2BC14,H2BC9,H2BC17,H2BC21,H2BC11,H2BC12,H2BU1,H2BC18,HMGA2,TET1,CENPV,BMP4,EIF6,RBM4,RMRP,H3C1,H3C4,H3C3,H3C6,H3C11,H3C8,H3C12,H3C10,H3C2,H3C7,LIMD1,HELZ,CELF1,ZC3H7B,AGO1,MIR320A
2_Member	GO Biological Processes	GO:0045814	negative regulation of gene expression, epigenetic	-14.4418	-12.0929	19/86	3006,3007,3008,3009,3012,3013,8329,8330,8332,8334,8335,8336,8338,8969,9355,55506,85235,92815,317772	H1-2,H1-3,H1-4,H1-5,H2AC8,H2AC7,H2AC13,H2AC15,H2AC16,H2AC6,H2AC4,H2AC17,H2AC20,H2AC11,LHX2,MACROH2A2,H2AC12,H2AW,H2AC21
2_Member	Reactome Gene Sets	R-HSA-5689901	Metalloprotease DUBs	-14.4267	-12.082	14/37	3012,3013,8329,8330,8331,8332,8334,8335,8336,8338,8969,85235,92815,317772	H2AC8,H2AC7,H2AC13,H2AC15,H2AC14,H2AC16,H2AC6,H2AC4,H2AC17,H2AC20,H2AC11,H2AC12,H2AW,H2AC21
2_Member	Reactome Gene Sets	R-HSA-5689880	Ub-specific processing proteases	-14.4015	-12.0609	28/220	3012,3013,3017,3018,4193,7157,8329,8330,8331,8332,8334,8335,8336,8338,8340,8341,8342,8345,8348,8349,8969,8970,85235,85236,92815,128312,317772,440689	H2AC8,H2AC7,H2BC5,H2BC3,MDM2,TP53,H2AC13,H2AC15,H2AC14,H2AC16,H2AC6,H2AC4,H2AC17,H2AC20,H2BC13,H2BC15,H2BC14,H2BC9,H2BC17,H2BC21,H2AC11,H2BC11,H2AC12,H2BC12,H2AW,H2BU1,H2AC21,H2BC18
2_Member	GO Biological Processes	GO:0006342	chromatin silencing	-14.2845	-11.9516	18/76	3006,3007,3008,3009,3012,3013,8329,8330,8332,8334,8335,8336,8338,8969,55506,85235,92815,317772	H1-2,H1-3,H1-4,H1-5,H2AC8,H2AC7,H2AC13,H2AC15,H2AC16,H2AC6,H2AC4,H2AC17,H2AC20,H2AC11,MACROH2A2,H2AC12,H2AW,H2AC21
2_Member	GO Biological Processes	GO:0097549	chromatin organization involved in negative regulation of transcription	-14.2839	-11.9516	21/113	3006,3007,3008,3009,3012,3013,8091,8329,8330,8332,8334,8335,8336,8338,8969,55506,80312,85235,92815,201161,317772	H1-2,H1-3,H1-4,H1-5,H2AC8,H2AC7,HMGA2,H2AC13,H2AC15,H2AC16,H2AC6,H2AC4,H2AC17,H2AC20,H2AC11,MACROH2A2,TET1,H2AC12,H2AW,CENPV,H2AC21
2_Member	GO Biological Processes	GO:0034401	chromatin organization involved in regulation of transcription	-13.2981	-10.9856	21/126	3006,3007,3008,3009,3012,3013,8091,8329,8330,8332,8334,8335,8336,8338,8969,55506,80312,85235,92815,201161,317772	H1-2,H1-3,H1-4,H1-5,H2AC8,H2AC7,HMGA2,H2AC13,H2AC15,H2AC16,H2AC6,H2AC4,H2AC17,H2AC20,H2AC11,MACROH2A2,TET1,H2AC12,H2AW,CENPV,H2AC21
2_Member	Reactome Gene Sets	R-HSA-5688426	Deubiquitination	-11.1107	-8.83173	28/298	3012,3013,3017,3018,4193,7157,8329,8330,8331,8332,8334,8335,8336,8338,8340,8341,8342,8345,8348,8349,8969,8970,85235,85236,92815,128312,317772,440689	H2AC8,H2AC7,H2BC5,H2BC3,MDM2,TP53,H2AC13,H2AC15,H2AC14,H2AC16,H2AC6,H2AC4,H2AC17,H2AC20,H2BC13,H2BC15,H2BC14,H2BC9,H2BC17,H2BC21,H2AC11,H2BC11,H2AC12,H2BC12,H2AW,H2BU1,H2AC21,H2BC18
2_Member	GO Biological Processes	GO:0040029	regulation of gene expression, epigenetic	-10.3547	-8.08643	19/142	3006,3007,3008,3009,3012,3013,8329,8330,8332,8334,8335,8336,8338,8969,9355,55506,85235,92815,317772	H1-2,H1-3,H1-4,H1-5,H2AC8,H2AC7,H2AC13,H2AC15,H2AC16,H2AC6,H2AC4,H2AC17,H2AC20,H2AC11,LHX2,MACROH2A2,H2AC12,H2AW,H2AC21
2_Member	Reactome Gene Sets	R-HSA-5689603	UCH proteinases	-7.94023	-5.69579	14/102	3012,3013,8329,8330,8331,8332,8334,8335,8336,8338,8969,85235,92815,317772	H2AC8,H2AC7,H2AC13,H2AC15,H2AC14,H2AC16,H2AC6,H2AC4,H2AC17,H2AC20,H2AC11,H2AC12,H2AW,H2AC21
2_Member	GO Biological Processes	GO:0016458	gene silencing	-7.07371	-4.84554	39/778	652,3006,3007,3008,3009,3012,3013,3692,5936,6023,7157,8329,8330,8332,8334,8335,8336,8338,8350,8351,8352,8353,8354,8355,8356,8357,8358,8968,8969,8994,9931,10658,23264,26523,55506,85235,92815,317772,407037	BMP4,H1-2,H1-3,H1-4,H1-5,H2AC8,H2AC7,EIF6,RBM4,RMRP,TP53,H2AC13,H2AC15,H2AC16,H2AC6,H2AC4,H2AC17,H2AC20,H3C1,H3C4,H3C3,H3C6,H3C11,H3C8,H3C12,H3C10,H3C2,H3C7,H2AC11,LIMD1,HELZ,CELF1,ZC3H7B,AGO1,MACROH2A2,H2AC12,H2AW,H2AC21,MIR320A
3_Summary	GO Biological Processes	GO:0060968	regulation of gene silencing	-13.6619	-11.3376	18/82	652,3006,3007,3008,3009,6023,7157,8350,8351,8352,8353,8354,8355,8356,8357,8358,8968,8994,3667,653604,55506,1647,3728,4193,4286,5328,6692,7102,8091,23303,30845,347733,2353,3589,3976,5600,5784,6657,7335,9021,388,2149,2151,3675,4842,5768,7042,23657,970,3661,9636	BMP4,H1-2,H1-3,H1-4,H1-5,RMRP,TP53,H3C1,H3C4,H3C3,H3C6,H3C11,H3C8,H3C12,H3C10,H3C2,H3C7,LIMD1,IRS1,H3C13,MACROH2A2,GADD45A,JUP,MDM2,MITF,PLAU,SPINT1,TSPAN7,HMGA2,KIF13B,EHD3,TUBB2B,FOS,IL11,LIF,MAPK11,PTPN14,SOX2,UBE2V1,SOCS3,RHOB,F2R,F2RL2,ITGA3,NOS1,QSOX1,TGFB2,SLC7A11,CD70,IRF3,ISG15
3_Member	GO Biological Processes	GO:0060968	regulation of gene silencing	-13.6619	-11.3376	18/82	652,3006,3007,3008,3009,6023,7157,8350,8351,8352,8353,8354,8355,8356,8357,8358,8968,8994	BMP4,H1-2,H1-3,H1-4,H1-5,RMRP,TP53,H3C1,H3C4,H3C3,H3C6,H3C11,H3C8,H3C12,H3C10,H3C2,H3C7,LIMD1
3_Member	Reactome Gene Sets	R-HSA-1266695	Interleukin-7 signaling	-11.6783	-9.38481	12/36	3667,8350,8351,8352,8353,8354,8355,8356,8357,8358,8968,653604	IRS1,H3C1,H3C4,H3C3,H3C6,H3C11,H3C8,H3C12,H3C10,H3C2,H3C7,H3C13
3_Member	WikiPathways	WP4553	FBXL10 enhancement of MAP/ERK signaling in diffuse large B-cell lymphoma	-11.3586	-9.07245	12/38	8350,8351,8352,8353,8354,8355,8356,8357,8358,8968,55506,653604	H3C1,H3C4,H3C3,H3C6,H3C11,H3C8,H3C12,H3C10,H3C2,H3C7,MACROH2A2,H3C13
3_Member	WikiPathways	WP4320	Effect of progerin on genes involved in Hutchinson-Gilford progeria syndrome	-11.2066	-8.92405	12/39	7157,8350,8351,8352,8353,8354,8355,8356,8357,8358,8968,653604	TP53,H3C1,H3C4,H3C3,H3C6,H3C11,H3C8,H3C12,H3C10,H3C2,H3C7,H3C13
3_Member	KEGG Pathway	hsa05202	Transcriptional misregulation in cancer	-8.43076	-6.17626	20/204	1647,3728,4193,4286,5328,6692,7102,7157,8091,8350,8351,8352,8353,8354,8355,8356,8357,8358,8968,653604	GADD45A,JUP,MDM2,MITF,PLAU,SPINT1,TSPAN7,TP53,HMGA2,H3C1,H3C4,H3C3,H3C6,H3C11,H3C8,H3C12,H3C10,H3C2,H3C7,H3C13
3_Member	KEGG Pathway	ko05202	Transcriptional misregulation in cancer	-7.78516	-5.54731	18/180	3728,4193,5328,6692,7102,7157,8091,8350,8351,8352,8353,8354,8355,8356,8357,8358,8968,653604	JUP,MDM2,PLAU,SPINT1,TSPAN7,TP53,HMGA2,H3C1,H3C4,H3C3,H3C6,H3C11,H3C8,H3C12,H3C10,H3C2,H3C7,H3C13
3_Member	Reactome Gene Sets	R-HSA-983231	Factors involved in megakaryocyte development and platelet production	-5.95755	-3.76019	15/168	7157,8350,8351,8352,8353,8354,8355,8356,8357,8358,8968,23303,30845,347733,653604	TP53,H3C1,H3C4,H3C3,H3C6,H3C11,H3C8,H3C12,H3C10,H3C2,H3C7,KIF13B,EHD3,TUBB2B,H3C13
3_Member	Reactome Gene Sets	R-HSA-449147	Signaling by Interleukins	-3.49826	-1.531	21/462	2353,3589,3667,3976,5600,5784,6657,7157,7335,8350,8351,8352,8353,8354,8355,8356,8357,8358,8968,9021,653604	FOS,IL11,IRS1,LIF,MAPK11,PTPN14,SOX2,TP53,UBE2V1,H3C1,H3C4,H3C3,H3C6,H3C11,H3C8,H3C12,H3C10,H3C2,H3C7,SOCS3,H3C13
3_Member	Reactome Gene Sets	R-HSA-109582	Hemostasis	-3.25976	-1.34675	25/621	388,2149,2151,3675,4842,5328,5768,7042,7102,7157,8350,8351,8352,8353,8354,8355,8356,8357,8358,8968,23303,23657,30845,347733,653604	RHOB,F2R,F2RL2,ITGA3,NOS1,PLAU,QSOX1,TGFB2,TSPAN7,TP53,H3C1,H3C4,H3C3,H3C6,H3C11,H3C8,H3C12,H3C10,H3C2,H3C7,KIF13B,SLC7A11,EHD3,TUBB2B,H3C13
3_Member	Reactome Gene Sets	R-HSA-1280215	Cytokine Signaling in Immune system	-2.14295	-0.557218	24/715	970,2353,3589,3661,3667,3976,5600,5784,6657,7157,7335,8350,8351,8352,8353,8354,8355,8356,8357,8358,8968,9021,9636,653604	CD70,FOS,IL11,IRF3,IRS1,LIF,MAPK11,PTPN14,SOX2,TP53,UBE2V1,H3C1,H3C4,H3C3,H3C6,H3C11,H3C8,H3C12,H3C10,H3C2,H3C7,SOCS3,ISG15,H3C13
4_Summary	GO Biological Processes	GO:0048729	tissue morphogenesis	-7.68117	-5.44657	35/618	72,388,652,1839,1952,1969,2296,2535,2637,3675,3714,3976,4193,4771,5613,6608,6664,6692,6909,7042,7134,7474,7482,8091,8549,9021,9355,9620,10653,23245,23616,51301,84446,90627,388585,257,2201,3899,4155,4488,6657,7157,8200,10586,60529,340784,320,2260,3880,9997,10658,10683,56243,57679,80312,130399,656,4322,5600,5734,6399,55553,10763,347733,6331,286046,389610,274,463,1465,2353,2539,4842,5936,23236,26263…	ACTG2,RHOB,BMP4,HBEGF,CELSR2,EPHA2,FOXC1,FZD2,GBX2,ITGA3,JAG2,LIF,MDM2,NF2,PRKX,SMO,SOX11,SPINT1,TBX2,TGFB2,TNNC1,WNT5A,WNT2B,HMGA2,LGR5,SOCS3,LHX2,CELSR1,SPINT2,ASTN2,SH3BP1,GCNT4,BRSK1,STARD13,HES5,ALX3,FBN2,AFF3,MBP,MSX2,SOX2,TP53,GDF5,MAB21L2,ALX4,HMX3,APBA1,FGFR1,KRT19,SCO2,CELF1,DLL3,KIAA1217,ALS2,TET1,ACVR1C,BMP8B,MMP13,MAPK11,PTGER4,TRAPPC2,SOX6,NES,TUBB2B,SCN5A,XKR6,XKR5,BIN1,ZFHX3,CSRP1…
4_Member	GO Biological Processes	GO:0048729	tissue morphogenesis	-7.68117	-5.44657	35/618	72,388,652,1839,1952,1969,2296,2535,2637,3675,3714,3976,4193,4771,5613,6608,6664,6692,6909,7042,7134,7474,7482,8091,8549,9021,9355,9620,10653,23245,23616,51301,84446,90627,388585	ACTG2,RHOB,BMP4,HBEGF,CELSR2,EPHA2,FOXC1,FZD2,GBX2,ITGA3,JAG2,LIF,MDM2,NF2,PRKX,SMO,SOX11,SPINT1,TBX2,TGFB2,TNNC1,WNT5A,WNT2B,HMGA2,LGR5,SOCS3,LHX2,CELSR1,SPINT2,ASTN2,SH3BP1,GCNT4,BRSK1,STARD13,HES5
4_Member	GO Biological Processes	GO:0048598	embryonic morphogenesis	-6.56774	-4.34904	32/595	257,652,1969,2201,2296,2535,2637,3675,3714,3899,4155,4488,4771,6608,6657,6664,6692,6909,7042,7157,7474,7482,8091,8200,9021,9355,9620,10586,10653,60529,340784,388585	ALX3,BMP4,EPHA2,FBN2,FOXC1,FZD2,GBX2,ITGA3,JAG2,AFF3,MBP,MSX2,NF2,SMO,SOX2,SOX11,SPINT1,TBX2,TGFB2,TP53,WNT5A,WNT2B,HMGA2,GDF5,SOCS3,LHX2,CELSR1,MAB21L2,SPINT2,ALX4,HMX3,HES5
4_Member	GO Biological Processes	GO:0002009	morphogenesis of an epithelium	-5.52204	-3.35878	27/509	388,652,1839,1952,1969,2535,2637,3714,3976,5613,6608,6664,6692,6909,7042,7474,7482,8549,9021,9355,9620,10653,23245,23616,84446,90627,388585	RHOB,BMP4,HBEGF,CELSR2,EPHA2,FZD2,GBX2,JAG2,LIF,PRKX,SMO,SOX11,SPINT1,TBX2,TGFB2,WNT5A,WNT2B,LGR5,SOCS3,LHX2,CELSR1,SPINT2,ASTN2,SH3BP1,BRSK1,STARD13,HES5
4_Member	GO Biological Processes	GO:0060411	cardiac septum morphogenesis	-5.18287	-3.04127	9/68	652,2535,4193,6608,6664,6909,7042,7157,7474	BMP4,FZD2,MDM2,SMO,SOX11,TBX2,TGFB2,TP53,WNT5A
4_Member	GO Biological Processes	GO:0009792	embryo development ending in birth or egg hatching	-5.09281	-2.9641	30/633	257,320,652,1969,2260,2296,2535,2637,3714,3880,3976,6608,6664,6692,7042,7157,7474,9021,9355,9620,9997,10653,10658,10683,56243,57679,60529,80312,130399,388585	ALX3,APBA1,BMP4,EPHA2,FGFR1,FOXC1,FZD2,GBX2,JAG2,KRT19,LIF,SMO,SOX11,SPINT1,TGFB2,TP53,WNT5A,SOCS3,LHX2,CELSR1,SCO2,SPINT2,CELF1,DLL3,KIAA1217,ALS2,ALX4,TET1,ACVR1C,HES5
4_Member	GO Biological Processes	GO:0021915	neural tube development	-5.00899	-2.88281	13/153	652,1969,2535,2637,6608,6664,6692,7042,7474,9355,9620,10653,388585	BMP4,EPHA2,FZD2,GBX2,SMO,SOX11,SPINT1,TGFB2,WNT5A,LHX2,CELSR1,SPINT2,HES5
4_Member	GO Biological Processes	GO:0043009	chordate embryonic development	-4.92796	-2.80929	29/613	257,320,652,1969,2260,2296,2535,2637,3714,3880,3976,6608,6664,6692,7042,7157,7474,9021,9355,9620,9997,10653,10683,56243,57679,60529,80312,130399,388585	ALX3,APBA1,BMP4,EPHA2,FGFR1,FOXC1,FZD2,GBX2,JAG2,KRT19,LIF,SMO,SOX11,SPINT1,TGFB2,TP53,WNT5A,SOCS3,LHX2,CELSR1,SCO2,SPINT2,DLL3,KIAA1217,ALS2,ALX4,TET1,ACVR1C,HES5
4_Member	GO Biological Processes	GO:0001501	skeletal system development	-4.60874	-2.5023	25/508	257,652,656,1969,2201,2260,2296,3714,4322,4488,5600,5734,6399,6664,7042,7157,7474,7482,8091,8200,10683,55553,56243,60529,388585	ALX3,BMP4,BMP8B,EPHA2,FBN2,FGFR1,FOXC1,JAG2,MMP13,MSX2,MAPK11,PTGER4,TRAPPC2,SOX11,TGFB2,TP53,WNT5A,WNT2B,HMGA2,GDF5,DLL3,SOX6,KIAA1217,ALX4,HES5
4_Member	GO Biological Processes	GO:0003206	cardiac chamber morphogenesis	-4.60153	-2.4975	11/121	652,2296,2535,4193,6608,6664,6909,7042,7134,7157,7474	BMP4,FOXC1,FZD2,MDM2,SMO,SOX11,TBX2,TGFB2,TNNC1,TP53,WNT5A
4_Member	GO Biological Processes	GO:0060562	epithelial tube morphogenesis	-4.53974	-2.44284	19/330	388,652,1969,2535,2637,5613,6608,6664,6692,6909,7042,7474,7482,8549,9355,9620,10653,90627,388585	RHOB,BMP4,EPHA2,FZD2,GBX2,PRKX,SMO,SOX11,SPINT1,TBX2,TGFB2,WNT5A,WNT2B,LGR5,LHX2,CELSR1,SPINT2,STARD13,HES5
4_Member	GO Biological Processes	GO:0016331	morphogenesis of embryonic epithelium	-4.46694	-2.37475	12/148	652,2535,3714,6664,6692,7042,7474,7482,9355,9620,10653,388585	BMP4,FZD2,JAG2,SOX11,SPINT1,TGFB2,WNT5A,WNT2B,LHX2,CELSR1,SPINT2,HES5
4_Member	GO Biological Processes	GO:0048568	embryonic organ development	-4.33024	-2.25409	22/433	257,652,1969,2201,2296,2535,2637,3880,3976,6608,6664,6692,6909,7042,7157,7474,9021,10653,10763,60529,340784,347733	ALX3,BMP4,EPHA2,FBN2,FOXC1,FZD2,GBX2,KRT19,LIF,SMO,SOX11,SPINT1,TBX2,TGFB2,TP53,WNT5A,SOCS3,SPINT2,NES,ALX4,HMX3,TUBB2B
4_Member	GO Biological Processes	GO:0003205	cardiac chamber development	-4.11031	-2.04963	12/161	652,2296,2535,4193,6331,6608,6664,6909,7042,7134,7157,7474	BMP4,FOXC1,FZD2,MDM2,SCN5A,SMO,SOX11,TBX2,TGFB2,TNNC1,TP53,WNT5A
4_Member	GO Biological Processes	GO:0072132	mesenchyme morphogenesis	-4.04131	-1.99558	7/55	72,652,2296,4193,6909,7042,7474	ACTG2,BMP4,FOXC1,MDM2,TBX2,TGFB2,WNT5A
4_Member	GO Biological Processes	GO:0062009	secondary palate development	-3.98057	-1.94519	5/25	2535,3714,6664,7042,7474	FZD2,JAG2,SOX11,TGFB2,WNT5A
4_Member	GO Biological Processes	GO:1902742	apoptotic process involved in development	-3.94133	-1.91205	6/40	652,2296,3714,7042,286046,389610	BMP4,FOXC1,JAG2,TGFB2,XKR6,XKR5
4_Member	GO Biological Processes	GO:0001838	embryonic epithelial tube formation	-3.85713	-1.83793	10/122	652,2535,6664,6692,7042,7474,9355,9620,10653,388585	BMP4,FZD2,SOX11,SPINT1,TGFB2,WNT5A,LHX2,CELSR1,SPINT2,HES5
4_Member	GO Biological Processes	GO:0003278	apoptotic process involved in heart morphogenesis	-3.85524	-1.83793	3/6	652,2296,7042	BMP4,FOXC1,TGFB2
4_Member	GO Biological Processes	GO:0001841	neural tube formation	-3.73631	-1.73253	9/103	652,2535,6664,6692,7042,7474,9355,9620,10653	BMP4,FZD2,SOX11,SPINT1,TGFB2,WNT5A,LHX2,CELSR1,SPINT2
4_Member	GO Biological Processes	GO:0003279	cardiac septum development	-3.73631	-1.73253	9/103	652,2535,4193,6608,6664,6909,7042,7157,7474	BMP4,FZD2,MDM2,SMO,SOX11,TBX2,TGFB2,TP53,WNT5A
4_Member	GO Biological Processes	GO:0003149	membranous septum morphogenesis	-3.61853	-1.64063	3/7	652,2535,7042	BMP4,FZD2,TGFB2
4_Member	GO Biological Processes	GO:0072175	epithelial tube formation	-3.55046	-1.57837	10/133	652,2535,6664,6692,7042,7474,9355,9620,10653,388585	BMP4,FZD2,SOX11,SPINT1,TGFB2,WNT5A,LHX2,CELSR1,SPINT2,HES5
4_Member	GO Biological Processes	GO:0061061	muscle structure development	-3.46758	-1.50728	26/636	274,463,652,1465,1839,2296,2353,2535,2539,3880,3976,4193,4842,5600,5936,6608,6664,6909,7042,7134,7474,23236,26263,55553,60529,84665	BIN1,ZFHX3,BMP4,CSRP1,HBEGF,FOXC1,FOS,FZD2,G6PD,KRT19,LIF,MDM2,NOS1,MAPK11,RBM4,SMO,SOX11,TBX2,TGFB2,TNNC1,WNT5A,PLCB1,FBXO22,SOX6,ALX4,MYPN
4_Member	GO Biological Processes	GO:0001843	neural tube closure	-3.46501	-1.50642	8/89	652,2535,6692,7042,7474,9355,9620,10653	BMP4,FZD2,SPINT1,TGFB2,WNT5A,LHX2,CELSR1,SPINT2
4_Member	GO Biological Processes	GO:0060606	tube closure	-3.43191	-1.48182	8/90	652,2535,6692,7042,7474,9355,9620,10653	BMP4,FZD2,SPINT1,TGFB2,WNT5A,LHX2,CELSR1,SPINT2
4_Member	GO Biological Processes	GO:0014020	primary neural tube formation	-3.27314	-1.35234	8/95	652,2535,6692,7042,7474,9355,9620,10653	BMP4,FZD2,SPINT1,TGFB2,WNT5A,LHX2,CELSR1,SPINT2
4_Member	GO Biological Processes	GO:0003151	outflow tract morphogenesis	-3.19569	-1.30085	7/75	652,2296,2535,6664,6909,7042,7474	BMP4,FOXC1,FZD2,SOX11,TBX2,TGFB2,WNT5A
4_Member	GO Biological Processes	GO:0003231	cardiac ventricle development	-3.16468	-1.27279	9/123	652,2296,2535,4193,6331,6664,7042,7134,7474	BMP4,FOXC1,FZD2,MDM2,SCN5A,SOX11,TGFB2,TNNC1,WNT5A
4_Member	GO Biological Processes	GO:0035148	tube formation	-3.15986	-1.27091	10/149	652,2535,6664,6692,7042,7474,9355,9620,10653,388585	BMP4,FZD2,SOX11,SPINT1,TGFB2,WNT5A,LHX2,CELSR1,SPINT2,HES5
4_Member	GO Biological Processes	GO:0048644	muscle organ morphogenesis	-3.09314	-1.2143	7/78	652,2296,2535,3976,7042,7134,7474	BMP4,FOXC1,FZD2,LIF,TGFB2,TNNC1,WNT5A
4_Member	GO Biological Processes	GO:0060412	ventricular septum morphogenesis	-2.99172	-1.13516	5/40	652,2535,6664,7042,7474	BMP4,FZD2,SOX11,TGFB2,WNT5A
4_Member	GO Biological Processes	GO:0060561	apoptotic process involved in morphogenesis	-2.89007	-1.06285	4/25	652,2296,3714,7042	BMP4,FOXC1,JAG2,TGFB2
4_Member	GO Biological Processes	GO:0060021	roof of mouth development	-2.84242	-1.02229	7/86	2535,3714,6664,6909,7042,7474,60529	FZD2,JAG2,SOX11,TBX2,TGFB2,WNT5A,ALX4
4_Member	GO Biological Processes	GO:0001763	morphogenesis of a branching structure	-2.76409	-0.96705	11/197	652,1969,2637,6608,6692,7474,7482,9021,9620,10653,53335	BMP4,EPHA2,GBX2,SMO,SPINT1,WNT5A,WNT2B,SOCS3,CELSR1,SPINT2,BCL11A
4_Member	GO Biological Processes	GO:0007517	muscle organ development	-2.69851	-0.926754	15/327	463,652,1839,2296,2353,2535,3976,6608,6664,7042,7134,7474,26263,55553,60529	ZFHX3,BMP4,HBEGF,FOXC1,FOS,FZD2,LIF,SMO,SOX11,TGFB2,TNNC1,WNT5A,FBXO22,SOX6,ALX4
4_Member	GO Biological Processes	GO:0048738	cardiac muscle tissue development	-2.6088	-0.866183	12/237	652,2296,2539,4488,5600,6331,6909,7042,7134,7474,55553,205428	BMP4,FOXC1,G6PD,MSX2,MAPK11,SCN5A,TBX2,TGFB2,TNNC1,WNT5A,SOX6,DIPK2A
4_Member	GO Biological Processes	GO:0060537	muscle tissue development	-2.59975	-0.859213	17/403	652,1465,2296,2353,2539,4488,5600,6331,6608,6664,6909,7042,7134,7474,26263,55553,205428	BMP4,CSRP1,FOXC1,FOS,G6PD,MSX2,MAPK11,SCN5A,SMO,SOX11,TBX2,TGFB2,TNNC1,WNT5A,FBXO22,SOX6,DIPK2A
4_Member	GO Biological Processes	GO:0003281	ventricular septum development	-2.58923	-0.853858	6/71	652,2535,4193,6664,7042,7474	BMP4,FZD2,MDM2,SOX11,TGFB2,WNT5A
4_Member	GO Biological Processes	GO:0060415	muscle tissue morphogenesis	-2.58923	-0.853858	6/71	652,2296,2535,7042,7134,7474	BMP4,FOXC1,FZD2,TGFB2,TNNC1,WNT5A
4_Member	GO Biological Processes	GO:0061138	morphogenesis of a branching epithelium	-2.49413	-0.788515	10/183	652,1969,2637,6608,6692,7474,7482,9021,9620,10653	BMP4,EPHA2,GBX2,SMO,SPINT1,WNT5A,WNT2B,SOCS3,CELSR1,SPINT2
4_Member	GO Biological Processes	GO:0014706	striated muscle tissue development	-2.42744	-0.744251	16/384	652,2296,2353,2539,4488,5600,6331,6608,6664,6909,7042,7134,7474,26263,55553,205428	BMP4,FOXC1,FOS,G6PD,MSX2,MAPK11,SCN5A,SMO,SOX11,TBX2,TGFB2,TNNC1,WNT5A,FBXO22,SOX6,DIPK2A
4_Member	GO Biological Processes	GO:2000738	positive regulation of stem cell differentiation	-2.25163	-0.627913	3/19	2296,7042,55553	FOXC1,TGFB2,SOX6
4_Member	WikiPathways	WP5053	Development of ureteric collection system	-2.21013	-0.600415	5/60	652,2296,6608,7042,9620	BMP4,FOXC1,SMO,TGFB2,CELSR1
4_Member	GO Biological Processes	GO:0003203	endocardial cushion morphogenesis	-2.16984	-0.576026	4/39	652,4193,6909,7042	BMP4,MDM2,TBX2,TGFB2
5_Summary	GO Biological Processes	GO:0007420	brain development	-6.97966	-4.75468	38/753	357,463,652,1021,1454,1952,2296,2539,2637,3777,4155,4747,4771,4826,4915,5455,6331,6608,6657,7157,7474,7482,9118,9355,9760,10642,10658,10763,22891,23236,23657,55079,55506,55553,57502,84197,340784,388585	SHROOM2,ZFHX3,BMP4,CDK6,CSNK1E,CELSR2,FOXC1,G6PD,GBX2,KCNK3,MBP,NEFL,NF2,NNAT,NTRK2,POU3F3,SCN5A,SMO,SOX2,TP53,WNT5A,WNT2B,INA,LHX2,TOX,IGF2BP1,CELF1,NES,ZNF365,PLCB1,SLC7A11,FEZF2,MACROH2A2,SOX6,NLGN4X,POMK,HMX3,HES5
5_Member	GO Biological Processes	GO:0007420	brain development	-6.97966	-4.75468	38/753	357,463,652,1021,1454,1952,2296,2539,2637,3777,4155,4747,4771,4826,4915,5455,6331,6608,6657,7157,7474,7482,9118,9355,9760,10642,10658,10763,22891,23236,23657,55079,55506,55553,57502,84197,340784,388585	SHROOM2,ZFHX3,BMP4,CDK6,CSNK1E,CELSR2,FOXC1,G6PD,GBX2,KCNK3,MBP,NEFL,NF2,NNAT,NTRK2,POU3F3,SCN5A,SMO,SOX2,TP53,WNT5A,WNT2B,INA,LHX2,TOX,IGF2BP1,CELF1,NES,ZNF365,PLCB1,SLC7A11,FEZF2,MACROH2A2,SOX6,NLGN4X,POMK,HMX3,HES5
5_Member	GO Biological Processes	GO:0060322	head development	-6.37702	-4.17064	38/796	357,463,652,1021,1454,1952,2296,2539,2637,3777,4155,4747,4771,4826,4915,5455,6331,6608,6657,7157,7474,7482,9118,9355,9760,10642,10658,10763,22891,23236,23657,55079,55506,55553,57502,84197,340784,388585	SHROOM2,ZFHX3,BMP4,CDK6,CSNK1E,CELSR2,FOXC1,G6PD,GBX2,KCNK3,MBP,NEFL,NF2,NNAT,NTRK2,POU3F3,SCN5A,SMO,SOX2,TP53,WNT5A,WNT2B,INA,LHX2,TOX,IGF2BP1,CELF1,NES,ZNF365,PLCB1,SLC7A11,FEZF2,MACROH2A2,SOX6,NLGN4X,POMK,HMX3,HES5
5_Member	GO Biological Processes	GO:0021537	telencephalon development	-4.43844	-2.3497	16/251	652,1021,4747,4771,4915,5455,6331,6608,7474,9355,10642,10658,23236,23657,55079,388585	BMP4,CDK6,NEFL,NF2,NTRK2,POU3F3,SCN5A,SMO,WNT5A,LHX2,IGF2BP1,CELF1,PLCB1,SLC7A11,FEZF2,HES5
5_Member	GO Biological Processes	GO:0030900	forebrain development	-4.18328	-2.11824	20/381	652,1021,2637,4747,4771,4915,5455,6331,6608,6657,7474,7482,9355,9760,10642,10658,23236,23657,55079,388585	BMP4,CDK6,GBX2,NEFL,NF2,NTRK2,POU3F3,SCN5A,SMO,SOX2,WNT5A,WNT2B,LHX2,TOX,IGF2BP1,CELF1,PLCB1,SLC7A11,FEZF2,HES5
5_Member	GO Biological Processes	GO:0021543	pallium development	-3.28623	-1.36386	11/170	1021,4747,4771,4915,5455,6608,9355,10642,10658,23236,55079	CDK6,NEFL,NF2,NTRK2,POU3F3,SMO,LHX2,IGF2BP1,CELF1,PLCB1,FEZF2
5_Member	GO Biological Processes	GO:0021987	cerebral cortex development	-2.13857	-0.555016	7/115	4747,4915,5455,6608,9355,10658,23236	NEFL,NTRK2,POU3F3,SMO,LHX2,CELF1,PLCB1
6_Summary	Reactome Gene Sets	R-HSA-8866654	E3 ubiquitin ligases ubiquitinate target proteins	-6.72474	-4.50291	10/59	3017,3018,8340,8341,8342,8345,8348,8970,85236,220441	H2BC5,H2BC3,H2BC13,H2BC15,H2BC14,H2BC9,H2BC17,H2BC11,H2BC12,RNF152
6_Member	Reactome Gene Sets	R-HSA-8866654	E3 ubiquitin ligases ubiquitinate target proteins	-6.72474	-4.50291	10/59	3017,3018,8340,8341,8342,8345,8348,8970,85236,220441	H2BC5,H2BC3,H2BC13,H2BC15,H2BC14,H2BC9,H2BC17,H2BC11,H2BC12,RNF152
6_Member	Reactome Gene Sets	R-HSA-8852135	Protein ubiquitination	-5.51515	-3.35497	10/79	3017,3018,8340,8341,8342,8345,8348,8970,85236,220441	H2BC5,H2BC3,H2BC13,H2BC15,H2BC14,H2BC9,H2BC17,H2BC11,H2BC12,RNF152
7_Summary	KEGG Pathway	hsa05200	Pathways in cancer	-6.53447	-4.31889	25/395	613,652,1021,1630,2149,2250,2260,2353,2535,3675,3728,4193,4286,5734,6608,7042,7157,7474,7482,8030,8326,9618,23236,112398,196883,656,1454,4771,5521,6657,8200,8994,1647,3714,10683,388585,5600,286,288,1839,2194,5328,463,3976,130399,8788,9076,55506,407037,267,1001,1952,8549,9620,30851,51421,57502	BCR,BMP4,CDK6,DCC,F2R,FGF5,FGFR1,FOS,FZD2,ITGA3,JUP,MDM2,MITF,PTGER4,SMO,TGFB2,TP53,WNT5A,WNT2B,CCDC6,FZD9,TRAF4,PLCB1,EGLN2,ADCY4,BMP8B,CSNK1E,NF2,PPP2R2B,SOX2,GDF5,LIMD1,GADD45A,JAG2,DLL3,HES5,MAPK11,ANK1,ANK3,HBEGF,FASN,PLAU,ZFHX3,LIF,ACVR1C,DLK1,CLDN1,MACROH2A2,MIR320A,AMFR,CDH3,CELSR2,LGR5,CELSR1,TAX1BP3,AMOTL2,NLGN4X
7_Member	KEGG Pathway	hsa05200	Pathways in cancer	-6.53447	-4.31889	25/395	613,652,1021,1630,2149,2250,2260,2353,2535,3675,3728,4193,4286,5734,6608,7042,7157,7474,7482,8030,8326,9618,23236,112398,196883	BCR,BMP4,CDK6,DCC,F2R,FGF5,FGFR1,FOS,FZD2,ITGA3,JUP,MDM2,MITF,PTGER4,SMO,TGFB2,TP53,WNT5A,WNT2B,CCDC6,FZD9,TRAF4,PLCB1,EGLN2,ADCY4
7_Member	KEGG Pathway	ko04390	Hippo signaling pathway	-4.97833	-2.85717	13/154	652,656,1454,2535,4771,5521,6657,7042,7474,7482,8200,8326,8994	BMP4,BMP8B,CSNK1E,FZD2,NF2,PPP2R2B,SOX2,TGFB2,WNT5A,WNT2B,GDF5,FZD9,LIMD1
7_Member	WikiPathways	WP4262	Breast cancer pathway	-4.88787	-2.77167	13/157	1021,1647,2250,2260,2353,2535,3714,7157,7474,7482,8326,10683,388585	CDK6,GADD45A,FGF5,FGFR1,FOS,FZD2,JAG2,TP53,WNT5A,WNT2B,FZD9,DLL3,HES5
7_Member	KEGG Pathway	hsa05224	Breast cancer	-4.742	-2.63071	13/162	1021,1647,2250,2260,2353,2535,3714,7157,7474,7482,8326,10683,388585	CDK6,GADD45A,FGF5,FGFR1,FOS,FZD2,JAG2,TP53,WNT5A,WNT2B,FZD9,DLL3,HES5
7_Member	WikiPathways	WP4787	Osteoblast differentiation and related diseases	-4.63536	-2.52651	11/120	652,2250,2260,2535,3714,5600,6608,7474,7482,8326,10683	BMP4,FGF5,FGFR1,FZD2,JAG2,MAPK11,SMO,WNT5A,WNT2B,FZD9,DLL3
7_Member	KEGG Pathway	ko05224	Breast cancer	-4.58505	-2.48341	12/144	1021,2250,2260,2353,2535,3714,7157,7474,7482,8326,10683,388585	CDK6,FGF5,FGFR1,FOS,FZD2,JAG2,TP53,WNT5A,WNT2B,FZD9,DLL3,HES5
7_Member	KEGG Pathway	hsa05205	Proteoglycans in cancer	-4.57933	-2.48007	15/218	286,288,1839,2194,2260,2535,4193,5328,5600,6608,7042,7157,7474,7482,8326	ANK1,ANK3,HBEGF,FASN,FGFR1,FZD2,MDM2,PLAU,MAPK11,SMO,TGFB2,TP53,WNT5A,WNT2B,FZD9
7_Member	KEGG Pathway	hsa04390	Hippo signaling pathway	-4.41489	-2.33194	13/174	652,656,1454,2535,4771,5521,6657,7042,7474,7482,8200,8326,8994	BMP4,BMP8B,CSNK1E,FZD2,NF2,PPP2R2B,SOX2,TGFB2,WNT5A,WNT2B,GDF5,FZD9,LIMD1
7_Member	KEGG Pathway	ko05205	Proteoglycans in cancer	-4.32461	-2.2507	14/203	286,288,1839,2260,2535,4193,5328,5600,6608,7042,7157,7474,7482,8326	ANK1,ANK3,HBEGF,FGFR1,FZD2,MDM2,PLAU,MAPK11,SMO,TGFB2,TP53,WNT5A,WNT2B,FZD9
7_Member	KEGG Pathway	ko04550	Signaling pathways regulating pluripotency of stem cells	-4.04778	-1.9957	11/139	463,652,2260,2535,3976,5600,6657,7474,7482,8326,130399	ZFHX3,BMP4,FGFR1,FZD2,LIF,MAPK11,SOX2,WNT5A,WNT2B,FZD9,ACVR1C
7_Member	KEGG Pathway	hsa05217	Basal cell carcinoma	-4.04131	-1.99558	7/55	652,2535,6608,7157,7474,7482,8326	BMP4,FZD2,SMO,TP53,WNT5A,WNT2B,FZD9
7_Member	KEGG Pathway	ko05217	Basal cell carcinoma	-4.04131	-1.99558	7/55	652,2535,6608,7157,7474,7482,8326	BMP4,FZD2,SMO,TP53,WNT5A,WNT2B,FZD9
7_Member	WikiPathways	WP4239	Epithelial to mesenchymal transition in colorectal cancer	-4.00818	-1.97076	12/165	2535,3714,3728,5600,7042,7157,7474,7482,8326,8788,9076,10683	FZD2,JAG2,JUP,MAPK11,TGFB2,TP53,WNT5A,WNT2B,FZD9,DLK1,CLDN1,DLL3
7_Member	WikiPathways	WP3931	Embryonic stem cell pluripotency pathways	-3.94708	-1.91579	10/119	652,2250,2260,2353,2535,3976,4193,7474,7482,8326	BMP4,FGF5,FGFR1,FOS,FZD2,LIF,MDM2,WNT5A,WNT2B,FZD9
7_Member	KEGG Pathway	hsa04550	Signaling pathways regulating pluripotency of stem cells	-3.67821	-1.68011	11/153	463,652,2260,2535,3976,5600,6657,7474,7482,8326,130399	ZFHX3,BMP4,FGFR1,FZD2,LIF,MAPK11,SOX2,WNT5A,WNT2B,FZD9,ACVR1C
7_Member	WikiPathways	WP399	Wnt signaling pathway and pluripotency	-3.61103	-1.63493	9/107	1454,2535,5328,5521,6657,7157,7474,7482,8326	CSNK1E,FZD2,PLAU,PPP2R2B,SOX2,TP53,WNT5A,WNT2B,FZD9
7_Member	WikiPathways	WP4258	lncRNA in canonical Wnt signaling and colorectal cancer	-3.01276	-1.14936	8/104	1021,1454,2535,5328,7474,7482,8326,55506	CDK6,CSNK1E,FZD2,PLAU,WNT5A,WNT2B,FZD9,MACROH2A2
7_Member	WikiPathways	WP4336	ncRNAs involved in Wnt signaling in hepatocellular carcinoma	-2.70042	-0.927539	7/91	1454,2535,5328,7474,7482,8326,407037	CSNK1E,FZD2,PLAU,WNT5A,WNT2B,FZD9,MIR320A
7_Member	KEGG Pathway	hsa04916	Melanogenesis	-2.44473	-0.757052	7/101	2535,4286,7474,7482,8326,23236,196883	FZD2,MITF,WNT5A,WNT2B,FZD9,PLCB1,ADCY4
7_Member	KEGG Pathway	ko04916	Melanogenesis	-2.44473	-0.757052	7/101	2535,4286,7474,7482,8326,23236,196883	FZD2,MITF,WNT5A,WNT2B,FZD9,PLCB1,ADCY4
7_Member	GO Biological Processes	GO:1905114	cell surface receptor signaling pathway involved in cell-cell signaling	-2.26317	-0.632244	20/546	267,652,1001,1454,1952,2535,3675,3728,4286,6608,6657,7474,7482,8326,8549,8994,9620,30851,51421,57502	AMFR,BMP4,CDH3,CSNK1E,CELSR2,FZD2,ITGA3,JUP,MITF,SMO,SOX2,WNT5A,WNT2B,FZD9,LGR5,LIMD1,CELSR1,TAX1BP3,AMOTL2,NLGN4X
7_Member	GO Biological Processes	GO:0016055	Wnt signaling pathway	-2.20189	-0.594528	17/442	267,1001,1454,1952,2535,3675,3728,4286,6657,7474,7482,8326,8549,8994,9620,30851,51421	AMFR,CDH3,CSNK1E,CELSR2,FZD2,ITGA3,JUP,MITF,SOX2,WNT5A,WNT2B,FZD9,LGR5,LIMD1,CELSR1,TAX1BP3,AMOTL2
7_Member	GO Biological Processes	GO:0198738	cell-cell signaling by wnt	-2.18316	-0.585627	17/444	267,1001,1454,1952,2535,3675,3728,4286,6657,7474,7482,8326,8549,8994,9620,30851,51421	AMFR,CDH3,CSNK1E,CELSR2,FZD2,ITGA3,JUP,MITF,SOX2,WNT5A,WNT2B,FZD9,LGR5,LIMD1,CELSR1,TAX1BP3,AMOTL2
7_Member	WikiPathways	WP4150	Wnt signaling in kidney disease	-2.16984	-0.576026	4/39	2535,7474,7482,8326	FZD2,WNT5A,WNT2B,FZD9
7_Member	WikiPathways	WP428	Wnt signaling	-2.07954	-0.519234	7/118	1454,2535,5328,7474,7482,8326,23236	CSNK1E,FZD2,PLAU,WNT5A,WNT2B,FZD9,PLCB1
8_Summary	Reactome Gene Sets	R-HSA-2559584	Formation of Senescence-Associated Heterochromatin Foci (SAHF)	-6.45009	-4.2376	6/16	3006,3007,3008,3009,7157,8091,1676,6023,51025,254225,80312	H1-2,H1-3,H1-4,H1-5,TP53,HMGA2,DFFA,RMRP,PAM16,RNF169,TET1
8_Member	Reactome Gene Sets	R-HSA-2559584	Formation of Senescence-Associated Heterochromatin Foci (SAHF)	-6.45009	-4.2376	6/16	3006,3007,3008,3009,7157,8091	H1-2,H1-3,H1-4,H1-5,TP53,HMGA2
8_Member	Reactome Gene Sets	R-HSA-140342	Apoptosis induced DNA fragmentation	-5.51256	-3.35497	5/13	1676,3006,3007,3008,3009	DFFA,H1-2,H1-3,H1-4,H1-5
8_Member	GO Biological Processes	GO:0060969	negative regulation of gene silencing	-4.07019	-2.01383	6/38	3006,3007,3008,3009,6023,7157	H1-2,H1-3,H1-4,H1-5,RMRP,TP53
8_Member	GO Biological Processes	GO:0031936	negative regulation of chromatin silencing	-3.91816	-1.89091	4/14	3006,3007,3008,3009	H1-2,H1-3,H1-4,H1-5
8_Member	GO Biological Processes	GO:0016584	nucleosome positioning	-3.67194	-1.67759	4/16	3006,3007,3008,3009	H1-2,H1-3,H1-4,H1-5
8_Member	GO Biological Processes	GO:0031935	regulation of chromatin silencing	-3.45969	-1.50452	4/18	3006,3007,3008,3009	H1-2,H1-3,H1-4,H1-5
8_Member	GO Biological Processes	GO:0051053	negative regulation of DNA metabolic process	-3.11426	-1.22968	9/125	1676,3006,3007,3008,3009,7157,8091,51025,254225	DFFA,H1-2,H1-3,H1-4,H1-5,TP53,HMGA2,PAM16,RNF169
8_Member	GO Biological Processes	GO:0030261	chromosome condensation	-2.63154	-0.880873	5/48	3006,3007,3008,3009,8091	H1-2,H1-3,H1-4,H1-5,HMGA2
8_Member	GO Biological Processes	GO:0045815	positive regulation of gene expression, epigenetic	-2.53422	-0.819896	4/31	3006,3007,3008,3009	H1-2,H1-3,H1-4,H1-5
8_Member	Reactome Gene Sets	R-HSA-75153	Apoptotic execution phase	-2.47782	-0.77942	5/52	1676,3006,3007,3008,3009	DFFA,H1-2,H1-3,H1-4,H1-5
8_Member	GO Biological Processes	GO:1905268	negative regulation of chromatin organization	-2.06461	-0.513137	5/65	3006,3007,3008,3009,80312	H1-2,H1-3,H1-4,H1-5,TET1
9_Summary	WikiPathways	WP4286	Genotoxicity pathway	-6.44654	-4.23712	10/63	1647,3008,3018,4193,5734,8341,8342,8351,26263,64782,388,2140,7157,8091,79035,84446,3675,9618	GADD45A,H1-4,H2BC3,MDM2,PTGER4,H2BC15,H2BC14,H3C4,FBXO22,AEN,RHOB,EYA3,TP53,HMGA2,NABP2,BRSK1,ITGA3,TRAF4
9_Member	WikiPathways	WP4286	Genotoxicity pathway	-6.44654	-4.23712	10/63	1647,3008,3018,4193,5734,8341,8342,8351,26263,64782	GADD45A,H1-4,H2BC3,MDM2,PTGER4,H2BC15,H2BC14,H3C4,FBXO22,AEN
9_Member	GO Biological Processes	GO:0010212	response to ionizing radiation	-2.5834	-0.850084	9/149	388,1647,2140,4193,7157,8091,64782,79035,84446	RHOB,GADD45A,EYA3,MDM2,TP53,HMGA2,AEN,NABP2,BRSK1
9_Member	Canonical Pathways	M256	PID TAP63 PATHWAY	-2.40631	-0.731242	5/54	1647,3675,4193,9618,64782	GADD45A,ITGA3,MDM2,TRAF4,AEN
10_Summary	GO Biological Processes	GO:0007423	sensory organ development	-6.23927	-4.03592	30/555	357,652,1826,1969,2201,2296,2301,2535,2637,3714,3777,4286,4771,4915,5158,6657,6664,6909,7042,7474,7482,8549,9355,9997,10586,10763,11020,23657,340784,388585,8091,407037	SHROOM2,BMP4,DSCAM,EPHA2,FBN2,FOXC1,FOXE3,FZD2,GBX2,JAG2,KCNK3,MITF,NF2,NTRK2,PDE6B,SOX2,SOX11,TBX2,TGFB2,WNT5A,WNT2B,LGR5,LHX2,SCO2,MAB21L2,NES,IFT27,SLC7A11,HMX3,HES5,HMGA2,MIR320A
10_Member	GO Biological Processes	GO:0007423	sensory organ development	-6.23927	-4.03592	30/555	357,652,1826,1969,2201,2296,2301,2535,2637,3714,3777,4286,4771,4915,5158,6657,6664,6909,7042,7474,7482,8549,9355,9997,10586,10763,11020,23657,340784,388585	SHROOM2,BMP4,DSCAM,EPHA2,FBN2,FOXC1,FOXE3,FZD2,GBX2,JAG2,KCNK3,MITF,NF2,NTRK2,PDE6B,SOX2,SOX11,TBX2,TGFB2,WNT5A,WNT2B,LGR5,LHX2,SCO2,MAB21L2,NES,IFT27,SLC7A11,HMX3,HES5
10_Member	GO Biological Processes	GO:0001654	eye development	-5.88674	-3.69529	23/372	357,652,1826,1969,2201,2296,2301,4286,4771,4915,5158,6657,6664,6909,7042,7474,7482,9355,9997,10586,10763,23657,388585	SHROOM2,BMP4,DSCAM,EPHA2,FBN2,FOXC1,FOXE3,MITF,NF2,NTRK2,PDE6B,SOX2,SOX11,TBX2,TGFB2,WNT5A,WNT2B,LHX2,SCO2,MAB21L2,NES,SLC7A11,HES5
10_Member	GO Biological Processes	GO:0150063	visual system development	-5.80783	-3.61931	23/376	357,652,1826,1969,2201,2296,2301,4286,4771,4915,5158,6657,6664,6909,7042,7474,7482,9355,9997,10586,10763,23657,388585	SHROOM2,BMP4,DSCAM,EPHA2,FBN2,FOXC1,FOXE3,MITF,NF2,NTRK2,PDE6B,SOX2,SOX11,TBX2,TGFB2,WNT5A,WNT2B,LHX2,SCO2,MAB21L2,NES,SLC7A11,HES5
10_Member	GO Biological Processes	GO:0043010	camera-type eye development	-5.77134	-3.58861	21/323	357,652,1826,1969,2201,2296,2301,4286,4771,4915,5158,6664,6909,7042,7474,7482,9355,10586,10763,23657,388585	SHROOM2,BMP4,DSCAM,EPHA2,FBN2,FOXC1,FOXE3,MITF,NF2,NTRK2,PDE6B,SOX11,TBX2,TGFB2,WNT5A,WNT2B,LHX2,MAB21L2,NES,SLC7A11,HES5
10_Member	GO Biological Processes	GO:0048880	sensory system development	-5.6917	-3.51751	23/382	357,652,1826,1969,2201,2296,2301,4286,4771,4915,5158,6657,6664,6909,7042,7474,7482,9355,9997,10586,10763,23657,388585	SHROOM2,BMP4,DSCAM,EPHA2,FBN2,FOXC1,FOXE3,MITF,NF2,NTRK2,PDE6B,SOX2,SOX11,TBX2,TGFB2,WNT5A,WNT2B,LHX2,SCO2,MAB21L2,NES,SLC7A11,HES5
10_Member	GO Biological Processes	GO:0002088	lens development in camera-type eye	-4.42878	-2.34353	9/84	357,652,1969,2301,4771,6664,7474,7482,23657	SHROOM2,BMP4,EPHA2,FOXE3,NF2,SOX11,WNT5A,WNT2B,SLC7A11
10_Member	GO Biological Processes	GO:0048593	camera-type eye morphogenesis	-3.88679	-1.86354	10/121	357,652,1826,1969,2301,4915,6664,6909,7474,7482	SHROOM2,BMP4,DSCAM,EPHA2,FOXE3,NTRK2,SOX11,TBX2,WNT5A,WNT2B
10_Member	GO Biological Processes	GO:0048592	eye morphogenesis	-3.70309	-1.70311	11/152	357,652,1826,1969,2201,2301,4915,6664,6909,7474,7482	SHROOM2,BMP4,DSCAM,EPHA2,FBN2,FOXE3,NTRK2,SOX11,TBX2,WNT5A,WNT2B
10_Member	GO Biological Processes	GO:0072089	stem cell proliferation	-3.26696	-1.34773	7/73	4771,6664,7474,7482,8091,10763,407037	NF2,SOX11,WNT5A,WNT2B,HMGA2,NES,MIR320A
10_Member	GO Biological Processes	GO:0090596	sensory organ morphogenesis	-3.25976	-1.34675	14/257	357,652,1826,1969,2201,2301,2535,2637,4915,6664,6909,7474,7482,340784	SHROOM2,BMP4,DSCAM,EPHA2,FBN2,FOXE3,FZD2,GBX2,NTRK2,SOX11,TBX2,WNT5A,WNT2B,HMX3
10_Member	GO Biological Processes	GO:0002089	lens morphogenesis in camera-type eye	-3.10793	-1.22479	4/22	357,652,1969,6664	SHROOM2,BMP4,EPHA2,SOX11
10_Member	GO Biological Processes	GO:0061303	cornea development in camera-type eye	-2.97033	-1.12185	3/11	2301,6664,7482	FOXE3,SOX11,WNT2B
10_Member	GO Biological Processes	GO:0048048	embryonic eye morphogenesis	-2.38564	-0.72116	4/34	2201,6664,6909,7474	FBN2,SOX11,TBX2,WNT5A
10_Member	GO Biological Processes	GO:0031076	embryonic camera-type eye development	-2.29501	-0.653464	4/36	6664,6909,7474,10763	SOX11,TBX2,WNT5A,NES
11_Summary	GO Biological Processes	GO:0048858	cell projection morphogenesis	-5.9823	-3.78196	32/633	288,1630,1826,1947,1952,1969,2637,4133,4681,4744,4747,4884,4915,6608,7474,9355,10642,10763,11178,22891,23098,23303,23327,23769,53335,55079,57679,84446,84665,114798,347733,440275,1465,3880,10653,57091,168002,3675,4193,4831,9760,91752,440730,1454,388585,53841,375790	ANK3,DCC,DSCAM,EFNB1,CELSR2,EPHA2,GBX2,MAP2,NBL1,NEFH,NEFL,NPTX1,NTRK2,SMO,WNT5A,LHX2,IGF2BP1,NES,LZTS1,ZNF365,SARM1,KIF13B,NEDD4L,FLRT1,BCL11A,FEZF2,ALS2,BRSK1,MYPN,SLITRK1,TUBB2B,EIF2AK4,CSRP1,KRT19,SPINT2,CASS4,DACT2,ITGA3,MDM2,NME2,TOX,ZNF804A,TRIM67,CSNK1E,HES5,CDHR5,AGRN
11_Member	GO Biological Processes	GO:0048858	cell projection morphogenesis	-5.9823	-3.78196	32/633	288,1630,1826,1947,1952,1969,2637,4133,4681,4744,4747,4884,4915,6608,7474,9355,10642,10763,11178,22891,23098,23303,23327,23769,53335,55079,57679,84446,84665,114798,347733,440275	ANK3,DCC,DSCAM,EFNB1,CELSR2,EPHA2,GBX2,MAP2,NBL1,NEFH,NEFL,NPTX1,NTRK2,SMO,WNT5A,LHX2,IGF2BP1,NES,LZTS1,ZNF365,SARM1,KIF13B,NEDD4L,FLRT1,BCL11A,FEZF2,ALS2,BRSK1,MYPN,SLITRK1,TUBB2B,EIF2AK4
11_Member	GO Biological Processes	GO:0048812	neuron projection morphogenesis	-5.80199	-3.61637	31/614	288,1630,1826,1947,1952,1969,2637,4133,4681,4744,4747,4884,4915,6608,7474,9355,10642,11178,22891,23098,23303,23327,23769,53335,55079,57679,84446,84665,114798,347733,440275	ANK3,DCC,DSCAM,EFNB1,CELSR2,EPHA2,GBX2,MAP2,NBL1,NEFH,NEFL,NPTX1,NTRK2,SMO,WNT5A,LHX2,IGF2BP1,LZTS1,ZNF365,SARM1,KIF13B,NEDD4L,FLRT1,BCL11A,FEZF2,ALS2,BRSK1,MYPN,SLITRK1,TUBB2B,EIF2AK4
11_Member	GO Biological Processes	GO:0032990	cell part morphogenesis	-5.72379	-3.54392	32/651	288,1630,1826,1947,1952,1969,2637,4133,4681,4744,4747,4884,4915,6608,7474,9355,10642,10763,11178,22891,23098,23303,23327,23769,53335,55079,57679,84446,84665,114798,347733,440275	ANK3,DCC,DSCAM,EFNB1,CELSR2,EPHA2,GBX2,MAP2,NBL1,NEFH,NEFL,NPTX1,NTRK2,SMO,WNT5A,LHX2,IGF2BP1,NES,LZTS1,ZNF365,SARM1,KIF13B,NEDD4L,FLRT1,BCL11A,FEZF2,ALS2,BRSK1,MYPN,SLITRK1,TUBB2B,EIF2AK4
11_Member	GO Biological Processes	GO:0120039	plasma membrane bounded cell projection morphogenesis	-5.58632	-3.41773	31/629	288,1630,1826,1947,1952,1969,2637,4133,4681,4744,4747,4884,4915,6608,7474,9355,10642,11178,22891,23098,23303,23327,23769,53335,55079,57679,84446,84665,114798,347733,440275	ANK3,DCC,DSCAM,EFNB1,CELSR2,EPHA2,GBX2,MAP2,NBL1,NEFH,NEFL,NPTX1,NTRK2,SMO,WNT5A,LHX2,IGF2BP1,LZTS1,ZNF365,SARM1,KIF13B,NEDD4L,FLRT1,BCL11A,FEZF2,ALS2,BRSK1,MYPN,SLITRK1,TUBB2B,EIF2AK4
11_Member	GO Biological Processes	GO:0032989	cellular component morphogenesis	-5.36571	-3.21083	34/743	288,1465,1630,1826,1947,1952,1969,2637,3880,4133,4681,4744,4747,4884,4915,6608,7474,9355,10642,10763,11178,22891,23098,23303,23327,23769,53335,55079,57679,84446,84665,114798,347733,440275	ANK3,CSRP1,DCC,DSCAM,EFNB1,CELSR2,EPHA2,GBX2,KRT19,MAP2,NBL1,NEFH,NEFL,NPTX1,NTRK2,SMO,WNT5A,LHX2,IGF2BP1,NES,LZTS1,ZNF365,SARM1,KIF13B,NEDD4L,FLRT1,BCL11A,FEZF2,ALS2,BRSK1,MYPN,SLITRK1,TUBB2B,EIF2AK4
11_Member	GO Biological Processes	GO:0048667	cell morphogenesis involved in neuron differentiation	-4.99578	-2.87212	27/544	288,1630,1826,1947,1952,1969,2637,4133,4744,4747,4884,4915,6608,7474,9355,10642,11178,22891,23098,23303,23327,55079,57679,84446,84665,114798,347733	ANK3,DCC,DSCAM,EFNB1,CELSR2,EPHA2,GBX2,MAP2,NEFH,NEFL,NPTX1,NTRK2,SMO,WNT5A,LHX2,IGF2BP1,LZTS1,ZNF365,SARM1,KIF13B,NEDD4L,FEZF2,ALS2,BRSK1,MYPN,SLITRK1,TUBB2B
11_Member	GO Biological Processes	GO:0000904	cell morphogenesis involved in differentiation	-4.34408	-2.26568	30/694	288,1630,1826,1947,1952,1969,2637,4133,4744,4747,4884,4915,6608,7474,9355,10642,10653,11178,22891,23098,23303,23327,55079,57091,57679,84446,84665,114798,168002,347733	ANK3,DCC,DSCAM,EFNB1,CELSR2,EPHA2,GBX2,MAP2,NEFH,NEFL,NPTX1,NTRK2,SMO,WNT5A,LHX2,IGF2BP1,SPINT2,LZTS1,ZNF365,SARM1,KIF13B,NEDD4L,FEZF2,CASS4,ALS2,BRSK1,MYPN,SLITRK1,DACT2,TUBB2B
11_Member	GO Biological Processes	GO:0007409	axonogenesis	-4.09149	-2.03298	21/418	288,1630,1826,1947,1969,2637,4133,4744,4747,4884,4915,6608,7474,9355,23303,55079,57679,84446,84665,114798,347733	ANK3,DCC,DSCAM,EFNB1,EPHA2,GBX2,MAP2,NEFH,NEFL,NPTX1,NTRK2,SMO,WNT5A,LHX2,KIF13B,FEZF2,ALS2,BRSK1,MYPN,SLITRK1,TUBB2B
11_Member	GO Biological Processes	GO:0061564	axon development	-3.43661	-1.48484	21/467	288,1630,1826,1947,1969,2637,4133,4744,4747,4884,4915,6608,7474,9355,23303,55079,57679,84446,84665,114798,347733	ANK3,DCC,DSCAM,EFNB1,EPHA2,GBX2,MAP2,NEFH,NEFL,NPTX1,NTRK2,SMO,WNT5A,LHX2,KIF13B,FEZF2,ALS2,BRSK1,MYPN,SLITRK1,TUBB2B
11_Member	GO Biological Processes	GO:0010975	regulation of neuron projection development	-3.29754	-1.37358	20/445	1630,1826,3675,4133,4193,4747,4831,4915,7474,9760,11178,22891,23098,23303,23327,53335,84446,91752,114798,440730	DCC,DSCAM,ITGA3,MAP2,MDM2,NEFL,NME2,NTRK2,WNT5A,TOX,LZTS1,ZNF365,SARM1,KIF13B,NEDD4L,BCL11A,BRSK1,ZNF804A,SLITRK1,TRIM67
11_Member	GO Biological Processes	GO:0016358	dendrite development	-2.50598	-0.799408	12/244	1630,1826,1952,4133,10642,11178,22891,23098,23327,23769,53335,55079	DCC,DSCAM,CELSR2,MAP2,IGF2BP1,LZTS1,ZNF365,SARM1,NEDD4L,FLRT1,BCL11A,FEZF2
11_Member	GO Biological Processes	GO:0050770	regulation of axonogenesis	-2.48753	-0.78288	9/154	1630,1826,4133,4747,4915,7474,23303,84446,114798	DCC,DSCAM,MAP2,NEFL,NTRK2,WNT5A,KIF13B,BRSK1,SLITRK1
11_Member	GO Biological Processes	GO:0021953	central nervous system neuron differentiation	-2.39485	-0.724066	10/189	1454,1630,2637,4133,4915,6608,7474,9760,55079,388585	CSNK1E,DCC,GBX2,MAP2,NTRK2,SMO,WNT5A,TOX,FEZF2,HES5
11_Member	GO Biological Processes	GO:0120035	regulation of plasma membrane bounded cell projection organization	-2.30088	-0.655176	23/655	1630,1826,1969,3675,4133,4193,4747,4831,4915,7474,9760,11178,22891,23098,23303,23327,53335,53841,84446,91752,114798,375790,440730	DCC,DSCAM,EPHA2,ITGA3,MAP2,MDM2,NEFL,NME2,NTRK2,WNT5A,TOX,LZTS1,ZNF365,SARM1,KIF13B,NEDD4L,BCL11A,CDHR5,BRSK1,ZNF804A,SLITRK1,AGRN,TRIM67
11_Member	GO Biological Processes	GO:0007411	axon guidance	-2.29379	-0.653067	11/227	1630,1826,1947,1969,2637,6608,7474,9355,55079,84665,347733	DCC,DSCAM,EFNB1,EPHA2,GBX2,SMO,WNT5A,LHX2,FEZF2,MYPN,TUBB2B
11_Member	GO Biological Processes	GO:0097485	neuron projection guidance	-2.27974	-0.643945	11/228	1630,1826,1947,1969,2637,6608,7474,9355,55079,84665,347733	DCC,DSCAM,EFNB1,EPHA2,GBX2,SMO,WNT5A,LHX2,FEZF2,MYPN,TUBB2B
11_Member	GO Biological Processes	GO:0031344	regulation of cell projection organization	-2.16425	-0.571919	23/673	1630,1826,1969,3675,4133,4193,4747,4831,4915,7474,9760,11178,22891,23098,23303,23327,53335,53841,84446,91752,114798,375790,440730	DCC,DSCAM,EPHA2,ITGA3,MAP2,MDM2,NEFL,NME2,NTRK2,WNT5A,TOX,LZTS1,ZNF365,SARM1,KIF13B,NEDD4L,BCL11A,CDHR5,BRSK1,ZNF804A,SLITRK1,AGRN,TRIM67
11_Member	GO Biological Processes	GO:0048813	dendrite morphogenesis	-2.10389	-0.532794	8/146	1826,1952,4133,10642,11178,22891,23098,23327	DSCAM,CELSR2,MAP2,IGF2BP1,LZTS1,ZNF365,SARM1,NEDD4L
11_Member	GO Biological Processes	GO:0021954	central nervous system neuron development	-2.08434	-0.522661	6/90	1630,2637,4133,4915,7474,55079	DCC,GBX2,MAP2,NTRK2,WNT5A,FEZF2
12_Summary	GO Biological Processes	GO:0043588	skin development	-5.95256	-3.75817	19/263	613,1001,1718,1969,2296,3675,3728,4831,6608,7042,7357,7474,8549,9076,9355,10626,55506,60529,168002,652,1021,2194,2301,2535,3714,3976,4771,5144,5613,6664,10653,23236,23616,23657,388585	BCR,CDH3,DHCR24,EPHA2,FOXC1,ITGA3,JUP,NME2,SMO,TGFB2,UGCG,WNT5A,LGR5,CLDN1,LHX2,TRIM16,MACROH2A2,ALX4,DACT2,BMP4,CDK6,FASN,FOXE3,FZD2,JAG2,LIF,NF2,PDE4D,PRKX,SOX11,SPINT2,PLCB1,SH3BP1,SLC7A11,HES5
12_Member	GO Biological Processes	GO:0043588	skin development	-5.95256	-3.75817	19/263	613,1001,1718,1969,2296,3675,3728,4831,6608,7042,7357,7474,8549,9076,9355,10626,55506,60529,168002	BCR,CDH3,DHCR24,EPHA2,FOXC1,ITGA3,JUP,NME2,SMO,TGFB2,UGCG,WNT5A,LGR5,CLDN1,LHX2,TRIM16,MACROH2A2,ALX4,DACT2
12_Member	GO Biological Processes	GO:0030855	epithelial cell differentiation	-4.14719	-2.08433	28/643	613,652,1001,1021,1969,2194,2296,2301,2535,3714,3976,4771,4831,5144,5613,6608,6664,7357,7474,9076,10626,10653,23236,23616,23657,55506,168002,388585	BCR,BMP4,CDH3,CDK6,EPHA2,FASN,FOXC1,FOXE3,FZD2,JAG2,LIF,NF2,NME2,PDE4D,PRKX,SMO,SOX11,UGCG,WNT5A,CLDN1,TRIM16,SPINT2,PLCB1,SH3BP1,SLC7A11,MACROH2A2,DACT2,HES5
12_Member	GO Biological Processes	GO:0045606	positive regulation of epidermal cell differentiation	-3.81279	-1.80133	5/27	652,2296,4831,10626,55506	BMP4,FOXC1,NME2,TRIM16,MACROH2A2
12_Member	GO Biological Processes	GO:0008544	epidermis development	-3.64192	-1.66042	17/324	613,652,1001,1969,2296,3714,4831,6608,7042,7357,7474,8549,9355,10626,55506,60529,388585	BCR,BMP4,CDH3,EPHA2,FOXC1,JAG2,NME2,SMO,TGFB2,UGCG,WNT5A,LGR5,LHX2,TRIM16,MACROH2A2,ALX4,HES5
12_Member	GO Biological Processes	GO:0030856	regulation of epithelial cell differentiation	-3.62909	-1.6494	11/155	652,2296,2301,3976,4831,5613,6608,10626,23236,55506,388585	BMP4,FOXC1,FOXE3,LIF,NME2,PRKX,SMO,TRIM16,PLCB1,MACROH2A2,HES5
12_Member	GO Biological Processes	GO:0045684	positive regulation of epidermis development	-3.45055	-1.49708	5/32	652,2296,4831,10626,55506	BMP4,FOXC1,NME2,TRIM16,MACROH2A2
12_Member	GO Biological Processes	GO:0045618	positive regulation of keratinocyte differentiation	-3.36372	-1.42852	4/19	2296,4831,10626,55506	FOXC1,NME2,TRIM16,MACROH2A2
12_Member	GO Biological Processes	GO:0009913	epidermal cell differentiation	-3.20013	-1.30381	12/202	613,652,1001,1969,2296,3714,4831,7357,7474,10626,55506,388585	BCR,BMP4,CDH3,EPHA2,FOXC1,JAG2,NME2,UGCG,WNT5A,TRIM16,MACROH2A2,HES5
12_Member	GO Biological Processes	GO:0045604	regulation of epidermal cell differentiation	-3.0462	-1.16879	6/58	652,2296,4831,10626,55506,388585	BMP4,FOXC1,NME2,TRIM16,MACROH2A2,HES5
12_Member	GO Biological Processes	GO:0030858	positive regulation of epithelial cell differentiation	-2.82093	-1.00576	6/64	652,2296,3976,4831,10626,55506	BMP4,FOXC1,LIF,NME2,TRIM16,MACROH2A2
12_Member	GO Biological Processes	GO:0030216	keratinocyte differentiation	-2.78932	-0.987516	9/139	613,1001,1969,2296,4831,7357,7474,10626,55506	BCR,CDH3,EPHA2,FOXC1,NME2,UGCG,WNT5A,TRIM16,MACROH2A2
12_Member	GO Biological Processes	GO:0045682	regulation of epidermis development	-2.78593	-0.986512	6/65	652,2296,4831,10626,55506,388585	BMP4,FOXC1,NME2,TRIM16,MACROH2A2,HES5
12_Member	GO Biological Processes	GO:0045616	regulation of keratinocyte differentiation	-2.25193	-0.627913	4/37	2296,4831,10626,55506	FOXC1,NME2,TRIM16,MACROH2A2
13_Summary	GO Biological Processes	GO:1903827	regulation of cellular protein localization	-5.71802	-3.541	28/527	288,652,1454,1969,3675,3728,3976,4133,4193,4771,5784,6526,6608,7474,8326,9258,9747,10228,23245,23255,23327,23657,30851,59353,65267,163882,164153,440730,4744,5936,7134,65990	ANK3,BMP4,CSNK1E,EPHA2,ITGA3,JUP,LIF,MAP2,MDM2,NF2,PTPN14,SLC5A3,SMO,WNT5A,FZD9,MFHAS1,TCAF1,STX6,ASTN2,MTCL1,NEDD4L,SLC7A11,TAX1BP3,TMEM35A,WNK3,CNST,UBL4B,TRIM67,NEFH,RBM4,TNNC1,ANTKMT
13_Member	GO Biological Processes	GO:1903827	regulation of cellular protein localization	-5.71802	-3.541	28/527	288,652,1454,1969,3675,3728,3976,4133,4193,4771,5784,6526,6608,7474,8326,9258,9747,10228,23245,23255,23327,23657,30851,59353,65267,163882,164153,440730	ANK3,BMP4,CSNK1E,EPHA2,ITGA3,JUP,LIF,MAP2,MDM2,NF2,PTPN14,SLC5A3,SMO,WNT5A,FZD9,MFHAS1,TCAF1,STX6,ASTN2,MTCL1,NEDD4L,SLC7A11,TAX1BP3,TMEM35A,WNK3,CNST,UBL4B,TRIM67
13_Member	GO Biological Processes	GO:1905477	positive regulation of protein localization to membrane	-2.95886	-1.11434	8/106	288,1969,3675,6526,9747,23255,65267,163882	ANK3,EPHA2,ITGA3,SLC5A3,TCAF1,MTCL1,WNK3,CNST
13_Member	GO Biological Processes	GO:1905475	regulation of protein localization to membrane	-2.63412	-0.880933	10/175	288,1969,3675,6526,8326,9747,23255,23657,65267,163882	ANK3,EPHA2,ITGA3,SLC5A3,FZD9,TCAF1,MTCL1,SLC7A11,WNK3,CNST
13_Member	GO Biological Processes	GO:1903829	positive regulation of cellular protein localization	-2.5082	-0.799705	13/276	288,1969,3675,3728,3976,6526,6608,9747,23255,59353,65267,163882,164153	ANK3,EPHA2,ITGA3,JUP,LIF,SLC5A3,SMO,TCAF1,MTCL1,TMEM35A,WNK3,CNST,UBL4B
13_Member	GO Biological Processes	GO:0032386	regulation of intracellular transport	-2.17997	-0.583182	14/337	288,652,3728,4133,4193,4744,5784,5936,6608,7134,9747,23255,65990,164153	ANK3,BMP4,JUP,MAP2,MDM2,NEFH,PTPN14,RBM4,SMO,TNNC1,TCAF1,MTCL1,ANTKMT,UBL4B
14_Summary	GO Biological Processes	GO:0048589	developmental growth	-5.6146	-3.44322	31/627	320,652,1081,1630,1826,2296,2539,4133,4322,5600,6608,6657,6909,7042,7157,7474,7543,8200,8326,9355,10658,23236,23327,23769,53335,57502,114798,130399,205428,375790,440275,1839,3009,3304,8091,9021,84275,112398	APBA1,BMP4,CGA,DCC,DSCAM,FOXC1,G6PD,MAP2,MMP13,MAPK11,SMO,SOX2,TBX2,TGFB2,TP53,WNT5A,ZFX,GDF5,FZD9,LHX2,CELF1,PLCB1,NEDD4L,FLRT1,BCL11A,NLGN4X,SLITRK1,ACVR1C,DIPK2A,AGRN,EIF2AK4,HBEGF,H1-5,HSPA1B,HMGA2,SOCS3,SLC25A33,EGLN2
14_Member	GO Biological Processes	GO:0048589	developmental growth	-5.6146	-3.44322	31/627	320,652,1081,1630,1826,2296,2539,4133,4322,5600,6608,6657,6909,7042,7157,7474,7543,8200,8326,9355,10658,23236,23327,23769,53335,57502,114798,130399,205428,375790,440275	APBA1,BMP4,CGA,DCC,DSCAM,FOXC1,G6PD,MAP2,MMP13,MAPK11,SMO,SOX2,TBX2,TGFB2,TP53,WNT5A,ZFX,GDF5,FZD9,LHX2,CELF1,PLCB1,NEDD4L,FLRT1,BCL11A,NLGN4X,SLITRK1,ACVR1C,DIPK2A,AGRN,EIF2AK4
14_Member	GO Biological Processes	GO:0048638	regulation of developmental growth	-3.54914	-1.57837	17/330	652,1081,1630,1826,2296,2539,4133,5600,6608,6909,7474,8200,10658,23236,23327,53335,375790	BMP4,CGA,DCC,DSCAM,FOXC1,G6PD,MAP2,MAPK11,SMO,TBX2,WNT5A,GDF5,CELF1,PLCB1,NEDD4L,BCL11A,AGRN
14_Member	GO Biological Processes	GO:0040008	regulation of growth	-3.21814	-1.31883	26/661	652,1081,1630,1826,1839,2296,2539,3009,3304,4133,5600,6608,6909,7042,7157,7474,8091,8200,9021,10658,23236,23327,53335,84275,112398,375790	BMP4,CGA,DCC,DSCAM,HBEGF,FOXC1,G6PD,H1-5,HSPA1B,MAP2,MAPK11,SMO,TBX2,TGFB2,TP53,WNT5A,HMGA2,GDF5,SOCS3,CELF1,PLCB1,NEDD4L,BCL11A,SLC25A33,EGLN2,AGRN
14_Member	GO Biological Processes	GO:0048640	negative regulation of developmental growth	-2.80485	-0.997023	8/112	652,1081,1630,2539,4133,5600,7474,53335	BMP4,CGA,DCC,G6PD,MAP2,MAPK11,WNT5A,BCL11A
14_Member	GO Biological Processes	GO:0060560	developmental growth involved in morphogenesis	-2.18401	-0.585724	11/235	652,1630,1826,4133,6909,7474,9355,23327,23769,53335,440275	BMP4,DCC,DSCAM,MAP2,TBX2,WNT5A,LHX2,NEDD4L,FLRT1,BCL11A,EIF2AK4
14_Member	GO Biological Processes	GO:0045926	negative regulation of growth	-2.00535	-0.471654	11/249	652,1081,1630,2539,3304,4133,5600,7042,7157,7474,53335	BMP4,CGA,DCC,G6PD,HSPA1B,MAP2,MAPK11,TGFB2,TP53,WNT5A,BCL11A
15_Summary	GO Biological Processes	GO:0061351	neural precursor cell proliferation	-5.23116	-3.0861	13/146	2637,4771,5455,6608,6692,7157,7474,8326,9355,9760,10642,10653,10763	GBX2,NF2,POU3F3,SMO,SPINT1,TP53,WNT5A,FZD9,LHX2,TOX,IGF2BP1,SPINT2,NES
15_Member	GO Biological Processes	GO:0061351	neural precursor cell proliferation	-5.23116	-3.0861	13/146	2637,4771,5455,6608,6692,7157,7474,8326,9355,9760,10642,10653,10763	GBX2,NF2,POU3F3,SMO,SPINT1,TP53,WNT5A,FZD9,LHX2,TOX,IGF2BP1,SPINT2,NES
15_Member	GO Biological Processes	GO:2000177	regulation of neural precursor cell proliferation	-5.13178	-2.99796	10/87	4771,6608,6692,7157,7474,8326,9355,9760,10653,10763	NF2,SMO,SPINT1,TP53,WNT5A,FZD9,LHX2,TOX,SPINT2,NES
15_Member	GO Biological Processes	GO:2000179	positive regulation of neural precursor cell proliferation	-2.40631	-0.731242	5/54	6608,8326,9355,9760,10763	SMO,FZD9,LHX2,TOX,NES
16_Summary	KEGG Pathway	hsa05014	Amyotrophic lateral sclerosis (ALS)	-5.23033	-3.0861	8/51	2890,4217,4744,4747,4842,5600,7157,57679,9118,2535,8326	GRIA1,MAP3K5,NEFH,NEFL,NOS1,MAPK11,TP53,ALS2,INA,FZD2,FZD9
16_Member	KEGG Pathway	hsa05014	Amyotrophic lateral sclerosis (ALS)	-5.23033	-3.0861	8/51	2890,4217,4744,4747,4842,5600,7157,57679	GRIA1,MAP3K5,NEFH,NEFL,NOS1,MAPK11,TP53,ALS2
16_Member	KEGG Pathway	ko05014	Amyotrophic lateral sclerosis (ALS)	-5.23033	-3.0861	8/51	2890,4217,4744,4747,4842,5600,7157,57679	GRIA1,MAP3K5,NEFH,NEFL,NOS1,MAPK11,TP53,ALS2
16_Member	GO Biological Processes	GO:0099185	postsynaptic intermediate filament cytoskeleton organization	-5.13728	-3.00088	3/3	4744,4747,9118	NEFH,NEFL,INA
16_Member	WikiPathways	WP2447	Amyotrophic lateral sclerosis (ALS)	-5.12388	-2.99262	7/38	2890,4217,4744,4747,4842,7157,57679	GRIA1,MAP3K5,NEFH,NEFL,NOS1,TP53,ALS2
16_Member	GO Biological Processes	GO:0060052	neurofilament cytoskeleton organization	-3.25094	-1.34255	3/9	4744,4747,9118	NEFH,NEFL,INA
16_Member	WikiPathways	WP3680	Physico-chemical features and toxicity-associated pathways	-2.68485	-0.917673	6/68	2535,2890,4744,4747,4842,8326	FZD2,GRIA1,NEFH,NEFL,NOS1,FZD9
16_Member	GO Biological Processes	GO:0099188	postsynaptic cytoskeleton organization	-2.64557	-0.890238	3/14	4744,4747,9118	NEFH,NEFL,INA
17_Summary	GO Biological Processes	GO:0001503	ossification	-5.16575	-3.02675	23/411	652,656,1021,1969,2194,2201,2296,4322,4488,5600,5734,6608,6657,6664,7042,7474,8200,8326,8994,9636,25819,51025,57665,1001,2260,2301,4831,5613,6331,8549,9076,114821,388585	BMP4,BMP8B,CDK6,EPHA2,FASN,FBN2,FOXC1,MMP13,MSX2,MAPK11,PTGER4,SMO,SOX2,SOX11,TGFB2,WNT5A,GDF5,FZD9,LIMD1,ISG15,NOCT,PAM16,RDH14,CDH3,FGFR1,FOXE3,NME2,PRKX,SCN5A,LGR5,CLDN1,ZBED9,HES5
17_Member	GO Biological Processes	GO:0001503	ossification	-5.16575	-3.02675	23/411	652,656,1021,1969,2194,2201,2296,4322,4488,5600,5734,6608,6657,6664,7042,7474,8200,8326,8994,9636,25819,51025,57665	BMP4,BMP8B,CDK6,EPHA2,FASN,FBN2,FOXC1,MMP13,MSX2,MAPK11,PTGER4,SMO,SOX2,SOX11,TGFB2,WNT5A,GDF5,FZD9,LIMD1,ISG15,NOCT,PAM16,RDH14
17_Member	GO Biological Processes	GO:0001649	osteoblast differentiation	-3.21559	-1.31777	13/230	652,1021,1969,2194,2201,4488,5600,6608,6657,6664,8994,25819,57665	BMP4,CDK6,EPHA2,FASN,FBN2,MSX2,MAPK11,SMO,SOX2,SOX11,LIMD1,NOCT,RDH14
17_Member	GO Biological Processes	GO:0050673	epithelial cell proliferation	-2.84469	-1.02331	19/450	652,1001,1021,1969,2260,2301,4831,5613,6331,6608,6657,6664,7042,7474,8200,8549,9076,114821,388585	BMP4,CDH3,CDK6,EPHA2,FGFR1,FOXE3,NME2,PRKX,SCN5A,SMO,SOX2,SOX11,TGFB2,WNT5A,GDF5,LGR5,CLDN1,ZBED9,HES5
17_Member	GO Biological Processes	GO:0050679	positive regulation of epithelial cell proliferation	-2.56392	-0.833653	11/209	652,1001,2260,2301,4831,6331,6608,6664,7474,9076,114821	BMP4,CDH3,FGFR1,FOXE3,NME2,SCN5A,SMO,SOX11,WNT5A,CLDN1,ZBED9
17_Member	GO Biological Processes	GO:0050678	regulation of epithelial cell proliferation	-2.34215	-0.6863	16/392	652,1001,1021,2260,2301,4831,6331,6608,6657,6664,7042,7474,8200,9076,114821,388585	BMP4,CDH3,CDK6,FGFR1,FOXE3,NME2,SCN5A,SMO,SOX2,SOX11,TGFB2,WNT5A,GDF5,CLDN1,ZBED9,HES5
18_Summary	GO Biological Processes	GO:1901214	regulation of neuron death	-4.74234	-2.63071	19/319	1630,1718,2149,2353,2539,2729,2914,4217,4747,4915,7042,7157,7474,8200,8326,10763,23098,23657,112398	DCC,DHCR24,F2R,FOS,G6PD,GCLC,GRM4,MAP3K5,NEFL,NTRK2,TGFB2,TP53,WNT5A,GDF5,FZD9,NES,SARM1,SLC7A11,EGLN2
18_Member	GO Biological Processes	GO:1901214	regulation of neuron death	-4.74234	-2.63071	19/319	1630,1718,2149,2353,2539,2729,2914,4217,4747,4915,7042,7157,7474,8200,8326,10763,23098,23657,112398	DCC,DHCR24,F2R,FOS,G6PD,GCLC,GRM4,MAP3K5,NEFL,NTRK2,TGFB2,TP53,WNT5A,GDF5,FZD9,NES,SARM1,SLC7A11,EGLN2
18_Member	GO Biological Processes	GO:0070997	neuron death	-4.01871	-1.97922	19/361	1630,1718,2149,2353,2539,2729,2914,4217,4747,4915,7042,7157,7474,8200,8326,10763,23098,23657,112398	DCC,DHCR24,F2R,FOS,G6PD,GCLC,GRM4,MAP3K5,NEFL,NTRK2,TGFB2,TP53,WNT5A,GDF5,FZD9,NES,SARM1,SLC7A11,EGLN2
18_Member	GO Biological Processes	GO:0043523	regulation of neuron apoptotic process	-3.01669	-1.15191	12/212	2149,2539,2729,2914,4747,4915,7042,7157,8200,8326,10763,112398	F2R,G6PD,GCLC,GRM4,NEFL,NTRK2,TGFB2,TP53,GDF5,FZD9,NES,EGLN2
18_Member	GO Biological Processes	GO:0051402	neuron apoptotic process	-2.47743	-0.77942	12/246	2149,2539,2729,2914,4747,4915,7042,7157,8200,8326,10763,112398	F2R,G6PD,GCLC,GRM4,NEFL,NTRK2,TGFB2,TP53,GDF5,FZD9,NES,EGLN2
19_Summary	WikiPathways	WP2064	Neural crest differentiation	-4.51821	-2.42368	10/102	388,652,2260,2637,4155,4286,4488,9355,10683,388585,1952,2296,6608,7157,7474,7482,55079,57801,60529,3714,6657,6909,9760,55553,4681,257,1947	RHOB,BMP4,FGFR1,GBX2,MBP,MITF,MSX2,LHX2,DLL3,HES5,CELSR2,FOXC1,SMO,TP53,WNT5A,WNT2B,FEZF2,HES4,ALX4,JAG2,SOX2,TBX2,TOX,SOX6,NBL1,ALX3,EFNB1
19_Member	WikiPathways	WP2064	Neural crest differentiation	-4.51821	-2.42368	10/102	388,652,2260,2637,4155,4286,4488,9355,10683,388585	RHOB,BMP4,FGFR1,GBX2,MBP,MITF,MSX2,LHX2,DLL3,HES5
19_Member	GO Biological Processes	GO:0009952	anterior/posterior pattern specification	-3.7573	-1.74778	13/202	652,1952,2296,2637,6608,7157,7474,7482,10683,55079,57801,60529,388585	BMP4,CELSR2,FOXC1,GBX2,SMO,TP53,WNT5A,WNT2B,DLL3,FEZF2,HES4,ALX4,HES5
19_Member	GO Biological Processes	GO:0021871	forebrain regionalization	-3.03163	-1.16408	4/23	652,7482,9355,55079	BMP4,WNT2B,LHX2,FEZF2
19_Member	GO Biological Processes	GO:0045165	cell fate commitment	-2.73258	-0.944905	13/260	652,3714,4286,6608,6657,6909,7157,7474,7482,9760,55079,55553,388585	BMP4,JAG2,MITF,SMO,SOX2,TBX2,TP53,WNT5A,WNT2B,TOX,FEZF2,SOX6,HES5
19_Member	GO Biological Processes	GO:0003002	regionalization	-2.64797	-0.890238	15/331	652,1952,2296,2637,4681,6608,7157,7474,7482,9355,10683,55079,57801,60529,388585	BMP4,CELSR2,FOXC1,GBX2,NBL1,SMO,TP53,WNT5A,WNT2B,LHX2,DLL3,FEZF2,HES4,ALX4,HES5
19_Member	GO Biological Processes	GO:0007389	pattern specification process	-2.58777	-0.853429	18/439	257,652,1947,1952,2296,2637,4681,6608,6909,7157,7474,7482,9355,10683,55079,57801,60529,388585	ALX3,BMP4,EFNB1,CELSR2,FOXC1,GBX2,NBL1,SMO,TBX2,TP53,WNT5A,WNT2B,LHX2,DLL3,FEZF2,HES4,ALX4,HES5
20_Summary	GO Biological Processes	GO:0070848	response to growth factor	-4.43725	-2.3497	31/720	463,652,656,1969,2201,2250,2260,2296,2353,2591,2729,3675,4193,4681,4842,4915,6657,6664,6692,7042,7157,7474,8200,9076,9110,10653,23769,55553,130399,222008,388585,8326,9636,274,1454,53335,55079,440275,257,3899,6909,60529,23657,90187,168002,151742,5734	ZFHX3,BMP4,BMP8B,EPHA2,FBN2,FGF5,FGFR1,FOXC1,FOS,GALNT3,GCLC,ITGA3,MDM2,NBL1,NOS1,NTRK2,SOX2,SOX11,SPINT1,TGFB2,TP53,WNT5A,GDF5,CLDN1,MTMR4,SPINT2,FLRT1,SOX6,ACVR1C,VSTM2A,HES5,FZD9,ISG15,BIN1,CSNK1E,BCL11A,FEZF2,EIF2AK4,ALX3,AFF3,TBX2,ALX4,SLC7A11,EMILIN3,DACT2,PPM1L,PTGER4
20_Member	GO Biological Processes	GO:0070848	response to growth factor	-4.43725	-2.3497	31/720	463,652,656,1969,2201,2250,2260,2296,2353,2591,2729,3675,4193,4681,4842,4915,6657,6664,6692,7042,7157,7474,8200,9076,9110,10653,23769,55553,130399,222008,388585	ZFHX3,BMP4,BMP8B,EPHA2,FBN2,FGF5,FGFR1,FOXC1,FOS,GALNT3,GCLC,ITGA3,MDM2,NBL1,NOS1,NTRK2,SOX2,SOX11,SPINT1,TGFB2,TP53,WNT5A,GDF5,CLDN1,MTMR4,SPINT2,FLRT1,SOX6,ACVR1C,VSTM2A,HES5
20_Member	GO Biological Processes	GO:0045778	positive regulation of ossification	-4.37107	-2.29039	7/49	652,2201,6664,7042,7474,8326,9636	BMP4,FBN2,SOX11,TGFB2,WNT5A,FZD9,ISG15
20_Member	GO Biological Processes	GO:0071772	response to BMP	-4.0334	-1.99184	12/164	652,656,3675,4681,6664,6692,7042,7474,8200,10653,222008,388585	BMP4,BMP8B,ITGA3,NBL1,SOX11,SPINT1,TGFB2,WNT5A,GDF5,SPINT2,VSTM2A,HES5
20_Member	GO Biological Processes	GO:0071773	cellular response to BMP stimulus	-4.0334	-1.99184	12/164	652,656,3675,4681,6664,6692,7042,7474,8200,10653,222008,388585	BMP4,BMP8B,ITGA3,NBL1,SOX11,SPINT1,TGFB2,WNT5A,GDF5,SPINT2,VSTM2A,HES5
20_Member	GO Biological Processes	GO:0045664	regulation of neuron differentiation	-3.90949	-1.88424	13/195	274,463,652,1454,2260,4681,6657,6664,8200,53335,55079,388585,440275	BIN1,ZFHX3,BMP4,CSNK1E,FGFR1,NBL1,SOX2,SOX11,GDF5,BCL11A,FEZF2,HES5,EIF2AK4
20_Member	GO Biological Processes	GO:0071363	cellular response to growth factor stimulus	-3.64839	-1.66508	28/689	652,656,2201,2250,2260,2296,2353,2591,2729,3675,4193,4681,4842,4915,6664,6692,7042,7157,7474,8200,9076,9110,10653,23769,55553,130399,222008,388585	BMP4,BMP8B,FBN2,FGF5,FGFR1,FOXC1,FOS,GALNT3,GCLC,ITGA3,MDM2,NBL1,NOS1,NTRK2,SOX11,SPINT1,TGFB2,TP53,WNT5A,GDF5,CLDN1,MTMR4,SPINT2,FLRT1,SOX6,ACVR1C,VSTM2A,HES5
20_Member	GO Biological Processes	GO:0035107	appendage morphogenesis	-3.39695	-1.45848	10/139	257,652,2201,3899,6664,6909,7042,7474,8200,60529	ALX3,BMP4,FBN2,AFF3,SOX11,TBX2,TGFB2,WNT5A,GDF5,ALX4
20_Member	GO Biological Processes	GO:0035108	limb morphogenesis	-3.39695	-1.45848	10/139	257,652,2201,3899,6664,6909,7042,7474,8200,60529	ALX3,BMP4,FBN2,AFF3,SOX11,TBX2,TGFB2,WNT5A,GDF5,ALX4
20_Member	GO Biological Processes	GO:0035137	hindlimb morphogenesis	-3.32398	-1.39552	5/34	257,652,3899,8200,60529	ALX3,BMP4,AFF3,GDF5,ALX4
20_Member	GO Biological Processes	GO:0030326	embryonic limb morphogenesis	-3.32266	-1.39552	9/117	257,652,2201,3899,6909,7042,7474,8200,60529	ALX3,BMP4,FBN2,AFF3,TBX2,TGFB2,WNT5A,GDF5,ALX4
20_Member	GO Biological Processes	GO:0035113	embryonic appendage morphogenesis	-3.32266	-1.39552	9/117	257,652,2201,3899,6909,7042,7474,8200,60529	ALX3,BMP4,FBN2,AFF3,TBX2,TGFB2,WNT5A,GDF5,ALX4
20_Member	GO Biological Processes	GO:0048736	appendage development	-3.22262	-1.32181	11/173	257,652,2201,3899,6664,6909,7042,7474,8200,23657,60529	ALX3,BMP4,FBN2,AFF3,SOX11,TBX2,TGFB2,WNT5A,GDF5,SLC7A11,ALX4
20_Member	GO Biological Processes	GO:0060173	limb development	-3.22262	-1.32181	11/173	257,652,2201,3899,6664,6909,7042,7474,8200,23657,60529	ALX3,BMP4,FBN2,AFF3,SOX11,TBX2,TGFB2,WNT5A,GDF5,SLC7A11,ALX4
20_Member	Reactome Gene Sets	R-HSA-2129379	Molecules associated with elastic fibres	-3.09547	-1.2152	5/38	652,2201,7042,8200,90187	BMP4,FBN2,TGFB2,GDF5,EMILIN3
20_Member	GO Biological Processes	GO:0090092	regulation of transmembrane receptor protein serine/threonine kinase signaling pathway	-2.77704	-0.978811	13/257	652,656,2201,3675,4681,6664,7042,7157,7474,8200,9110,168002,388585	BMP4,BMP8B,FBN2,ITGA3,NBL1,SOX11,TGFB2,TP53,WNT5A,GDF5,MTMR4,DACT2,HES5
20_Member	GO Biological Processes	GO:0035116	embryonic hindlimb morphogenesis	-2.7612	-0.966513	4/27	257,652,3899,60529	ALX3,BMP4,AFF3,ALX4
20_Member	Reactome Gene Sets	R-HSA-1566948	Elastic fibre formation	-2.75747	-0.963963	5/45	652,2201,7042,8200,90187	BMP4,FBN2,TGFB2,GDF5,EMILIN3
20_Member	GO Biological Processes	GO:0007178	transmembrane receptor protein serine/threonine kinase signaling pathway	-2.71454	-0.937009	16/359	652,656,2201,2353,3675,4681,6664,7042,7157,7474,8200,9110,130399,151742,168002,388585	BMP4,BMP8B,FBN2,FOS,ITGA3,NBL1,SOX11,TGFB2,TP53,WNT5A,GDF5,MTMR4,ACVR1C,PPM1L,DACT2,HES5
20_Member	GO Biological Processes	GO:0030278	regulation of ossification	-2.70813	-0.933008	8/116	652,2201,5734,6664,7042,7474,8326,9636	BMP4,FBN2,PTGER4,SOX11,TGFB2,WNT5A,FZD9,ISG15
20_Member	GO Biological Processes	GO:0045666	positive regulation of neuron differentiation	-2.61998	-0.875273	7/94	652,1454,2260,4681,6664,8200,55079	BMP4,CSNK1E,FGFR1,NBL1,SOX11,GDF5,FEZF2
20_Member	GO Biological Processes	GO:0030510	regulation of BMP signaling pathway	-2.59391	-0.855911	7/95	652,3675,4681,6664,7474,8200,388585	BMP4,ITGA3,NBL1,SOX11,WNT5A,GDF5,HES5
20_Member	GO Biological Processes	GO:0030509	BMP signaling pathway	-2.54452	-0.825275	9/151	652,656,3675,4681,6664,7042,7474,8200,388585	BMP4,BMP8B,ITGA3,NBL1,SOX11,TGFB2,WNT5A,GDF5,HES5
20_Member	GO Biological Processes	GO:0071559	response to transforming growth factor beta	-2.28721	-0.648957	12/260	463,2201,2353,3675,6664,7042,7157,7474,8200,9076,9110,55553	ZFHX3,FBN2,FOS,ITGA3,SOX11,TGFB2,TP53,WNT5A,GDF5,CLDN1,MTMR4,SOX6
20_Member	GO Biological Processes	GO:0030513	positive regulation of BMP signaling pathway	-2.25193	-0.627913	4/37	652,6664,8200,388585	BMP4,SOX11,GDF5,HES5
20_Member	KEGG Pathway	hsa04350	TGF-beta signaling pathway	-2.22753	-0.607007	6/84	652,656,4681,7042,8200,130399	BMP4,BMP8B,NBL1,TGFB2,GDF5,ACVR1C
20_Member	KEGG Pathway	ko04350	TGF-beta signaling pathway	-2.22753	-0.607007	6/84	652,656,4681,7042,8200,130399	BMP4,BMP8B,NBL1,TGFB2,GDF5,ACVR1C
20_Member	GO Biological Processes	GO:0030501	positive regulation of bone mineralization	-2.13067	-0.552331	4/40	652,2201,8326,9636	BMP4,FBN2,FZD9,ISG15
