# Supplementary material for: Transcriptional profiling of Hutchinson-Gilford Progeria syndrome fibroblasts reveals deficits in mesenchymal stem cell commitment to differentiation related to early events in endochondral ossification
Source: eLife journal article supplement (doi:10.7554/elife.81290), 2022-12-29
Supplement: table1-data1 [file metascape_result.xlsx]

## Sheet: Annotation
MyList	Gene ID	Type	Tax ID	Homologene Gene ID	Homologene Gene Tax ID	Gene Symbol	Description	Biological Process (GO)	Kinase Class (UniProt)	Protein Function (Protein Atlas)	Subcellular Location (Protein Atlas)	Drug (DrugBank)	Canonical Pathways	Hallmark Gene Sets	GO:0043408 regulation of MAPK cascade	GO:0045444 fat cell differentiation	GO:0090257 regulation of muscle system pr	hsa04919 thyroid hormone signaling path	GO:0008277 regulation of G protein-couple	hsa04621 NOD-like receptor signaling pa	GO:0007178 transmembrane receptor protein	GO:0009952 anterior/posterior pattern spe
AARD	441376	symbol	H. sapiens	441376	H. sapiens	AARD	alanine and arginine rich domain containing protein	GO:0030324 lung development;GO:0030323 respiratory tube development;GO:0060541 respiratory system development		Predicted intracellular proteins	Lipid droplets (Approved)				0	0	0	0	0	0	0	0
AKAP7	9465	symbol	H. sapiens	9465	H. sapiens	AKAP7	A-kinase anchoring protein 7	GO:0010738 regulation of protein kinase A signaling;GO:0010737 protein kinase A signaling;GO:0050804 modulation of chemical synaptic transmission		Predicted intracellular proteins	Vesicles (Approved)			(M5916)HALLMARK APICAL SURFACE	0	0	0	0	0	0	0	0
AKR1C2	1646	symbol	H. sapiens	1646	H. sapiens	AKR1C2	aldo-keto reductase family 1 member C2	GO:0009753 response to jasmonic acid;GO:0071395 cellular response to jasmonic acid stimulus;GO:0071798 response to prostaglandin D		Predicted intracellular proteins; FDA approved drug targets:Small molecule drugs; Enzymes; ENZYME proteins:Oxidoreductases; Disease related genes	Cytosol;Nucleoplasm (Approved); Additional: Endoplasmic reticulum;Nucleoli fibrillar center	NADH; Ursodeoxycholic acid; Nicotinamide adenine dinucleotide phosphate; Chenodeoxycholic acid; Epitestosterone		(M5934)HALLMARK XENOBIOTIC METABOLISM	1	0	0	0	0	0	0	0
B4GALT5	9334	symbol	H. sapiens	9334	H. sapiens	B4GALT5	beta-1,4-galactosyltransferase 5	GO:0010706 ganglioside biosynthetic process via lactosylceramide;GO:0030311 poly-N-acetyllactosamine biosynthetic process;GO:0030309 poly-N-acetyllactosamine metabolic process		Predicted intracellular proteins				(M5890)HALLMARK TNFA SIGNALING VIA NFKB	1	0	0	0	0	0	0	0
C10orf11	83938	gene_synonym	H. sapiens	83938	H. sapiens	LRMDA	leucine rich melanocyte differentiation associated	GO:0030318 melanocyte differentiation;GO:0050931 pigment cell differentiation;GO:0048066 developmental pigmentation		Predicted intracellular proteins; Disease related genes	Nucleoplasm (Supported); Additional: Cytosol				0	0	0	0	0	0	0	0
C16orf74	404550	symbol	H. sapiens	404550	H. sapiens	C16orf74	chromosome 16 open reading frame 74			Predicted intracellular proteins	Plasma membrane (Approved); Additional: Centrosome				0	0	0	0	0	0	0	0
C1QTNF3	114899	symbol	H. sapiens	114899	H. sapiens	C1QTNF3	C1q and TNF related 3	GO:0070165 positive regulation of adiponectin secretion;GO:0071638 negative regulation of monocyte chemotactic protein-1 production;GO:0070162 adiponectin secretion		Predicted secreted proteins	Golgi apparatus (Approved)		(M5880)NABA ECM AFFILIATED; (M5885)NABA MATRISOME ASSOCIATED; (M5889)NABA MATRISOME		1	1	0	0	0	0	0	0
C2orf88	84281	symbol	H. sapiens	84281	H. sapiens	C2orf88	chromosome 2 open reading frame 88			Predicted intracellular proteins					0	0	0	0	0	0	0	0
C8orf33	65265	symbol	H. sapiens	65265	H. sapiens	C8orf33	chromosome 8 open reading frame 33			Predicted intracellular proteins	Nucleoplasm;Plasma membrane (Uncertain)				0	0	0	0	0	0	0	0
CARD6	84674	symbol	H. sapiens	84674	H. sapiens	CARD6	caspase recruitment domain family member 6	GO:0042981 regulation of apoptotic process;GO:0043067 regulation of programmed cell death;GO:0010941 regulation of cell death		Predicted intracellular proteins					0	0	0	0	0	1	0	0
CCL26	10344	symbol	H. sapiens	10344	H. sapiens	CCL26	C-C motif chemokine ligand 26	GO:0048245 eosinophil chemotaxis;GO:0072677 eosinophil migration;GO:0010818 T cell chemotaxis		Predicted secreted proteins			(M28)PID IL4 2PATHWAY; (M5883)NABA SECRETED FACTORS; (M5885)NABA MATRISOME ASSOCIATED		1	0	0	0	1	0	0	0
CDH18	1016	symbol	H. sapiens	1016	H. sapiens	CDH18	cadherin 18	GO:0016339 calcium-dependent cell-cell adhesion via plasma membrane cell adhesion molecules;GO:0034332 adherens junction organization;GO:0007043 cell-cell junction assembly		Predicted intracellular proteins					0	0	0	0	0	0	0	0
CIB1	10519	symbol	H. sapiens	10519	H. sapiens	CIB1	calcium and integrin binding 1	GO:1905938 positive regulation of germ cell proliferation;GO:2000256 positive regulation of male germ cell proliferation;GO:0007113 endomitotic cell cycle		Predicted intracellular proteins	Nucleoplasm;Plasma membrane (Supported)	Calcium citrate; Calcium Phosphate; Calcium phosphate dihydrate			1	1	0	0	0	0	0	0
CLK1	1195	symbol	H. sapiens	1195	H. sapiens	CLK1	CDC like kinase 1	GO:0018107 peptidyl-threonine phosphorylation;GO:0018210 peptidyl-threonine modification;GO:0043484 regulation of RNA splicing	CMGC Ser/Thr protein kinase family	ENZYME proteins:Transferases; Predicted intracellular proteins; Kinases:CMGC Ser/Thr protein kinases; Enzymes	Nuclear membrane;Nucleoplasm (Supported)	Debromohymenialdisine; CHGN111; ethyl 3-[(E)-2-amino-1-cyanoethenyl]-6,7-dichloro-1-methyl-1H-indole-2-carboxylate; Fostamatinib			1	0	0	0	0	0	0	0
CMYA5	202333	symbol	H. sapiens	202333	H. sapiens	CMYA5	cardiomyopathy associated 5			Predicted intracellular proteins	Cytosol;Nuclear speckles (Approved); Additional: Plasma membrane;Vesicles				0	0	0	0	0	0	0	0
CTSB	1508	symbol	H. sapiens	1508	H. sapiens	CTSB	cathepsin B	GO:0097067 cellular response to thyroid hormone stimulus;GO:0006590 thyroid hormone generation;GO:0097066 response to thyroid hormone		Cancer-related genes:Candidate cancer biomarkers; Peptidases:Cysteine-type peptidases; Candidate cardiovascular disease genes; Predicted secreted proteins; ENZYME proteins:Hydrolases; Enzymes	Vesicles (Supported); Additional: Nucleoli	2-Aminoethanimidic Acid; 3-Amino-4-Oxybenzyl-2-Butanone; 3-Methylphenylalanine; N-(3-Propylcarbamoyloxirane-2-Carbonyl)-Isoleucyl-Proline; 2-Pyridinethiol; Diphenylacetic acid; N-[1-Hydroxycarboxyethyl-Carbonyl]Leucylamino-2-Methyl-Butane; N-{[(2S,3S)-3-(Ethoxycarbonyl)-2-oxiranyl]carbonyl}-L-threonyl-L-isoleucine; N-{[(2S,3S)-3-(ETHOXYCARBONYL)OXIRAN-2-YL]CARBONYL}-L-ISOLEUCINE; BENZYL N-({(2S,3…	(M3468)NABA ECM REGULATORS; (M5885)NABA MATRISOME ASSOCIATED; (M5889)NABA MATRISOME	(M5946)HALLMARK COAGULATION; (M5921)HALLMARK COMPLEMENT; (M5945)HALLMARK HEME METABOLISM	0	0	0	0	0	1	0	0
DCUN1D2	55208	symbol	H. sapiens	55208	H. sapiens	DCUN1D2	defective in cullin neddylation 1 domain containing 2	GO:2000436 positive regulation of protein neddylation;GO:2000434 regulation of protein neddylation;GO:0045116 protein neddylation		Predicted intracellular proteins	Cytosol;Plasma membrane (Approved)				0	0	0	0	0	0	0	0
FKBPL	63943	symbol	H. sapiens	63943	H. sapiens	FKBPL	FKBP prolyl isomerase like	GO:1905553 regulation of blood vessel branching;GO:0001569 branching involved in blood vessel morphogenesis;GO:0060688 regulation of morphogenesis of a branching structure		Predicted intracellular proteins	Nucleoplasm (Approved); Additional: Mitotic spindle				0	0	0	0	0	0	0	0
FLJ12825	440101	symbol	H. sapiens	440101	H. sapiens	FLJ12825	uncharacterized LOC440101								0	0	0	0	0	0	0	0
FOXO1	2308	symbol	H. sapiens	2308	H. sapiens	FOXO1	forkhead box O1	GO:1902617 response to fluoride;GO:0071455 cellular response to hyperoxia;GO:0010616 negative regulation of cardiac muscle adaptation		Cancer-related genes:Candidate cancer biomarkers; Predicted intracellular proteins; Disease related genes; Transcription factors:Helix-turn-helix domains	Cytosol;Nucleoplasm (Supported)		(M32)PID HDAC CLASSIII PATHWAY; (M249)PID PI3KCI AKT PATHWAY; (M14532)ST PHOSPHOINOSITIDE 3 KINASE PATHWAY	(M5957)HALLMARK PANCREAS BETA CELLS	1	1	1	1	0	0	0	0
FUT8	2530	symbol	H. sapiens	2530	H. sapiens	FUT8	fucosyltransferase 8	GO:0036071 N-glycan fucosylation;GO:0033578 protein glycosylation in Golgi;GO:0046368 GDP-L-fucose metabolic process		ENZYME proteins:Transferases; Predicted intracellular proteins; Enzymes	Golgi apparatus (Approved); Additional: Cytosol;Nucleoplasm			(M5937)HALLMARK GLYCOLYSIS	1	0	1	0	0	0	1	1
GLIPR2	152007	symbol	H. sapiens	152007	H. sapiens	GLIPR2	GLI pathogenesis related 2	GO:0010718 positive regulation of epithelial to mesenchymal transition;GO:0010717 regulation of epithelial to mesenchymal transition;GO:0001837 epithelial to mesenchymal transition		Predicted intracellular proteins	Vesicles (Uncertain); Additional: Microtubules	L-cysteic acid		(M5947)HALLMARK IL2 STAT5 SIGNALING	1	0	0	0	0	0	0	0
GPER1	2852	symbol	H. sapiens	2852	H. sapiens	GPER1	G protein-coupled estrogen receptor 1	GO:0030264 nuclear fragmentation involved in apoptotic nuclear change;GO:2000724 positive regulation of cardiac vascular smooth muscle cell differentiation;GO:0030263 apoptotic chromosome condensation		Predicted intracellular proteins; Transporters; G-protein coupled receptors:GPCRs excl olfactory receptors	Nucleoli (Approved); Additional: Cytosol;Nucleoplasm;Vesicles	Estradiol; Genistein; MK-0354; Estradiol acetate; Estradiol benzoate; Estradiol cypionate; Estradiol dienanthate; Estradiol valerate		(M5907)HALLMARK ESTROGEN RESPONSE LATE	1	1	1	0	1	0	0	0
GPRC5B	51704	symbol	H. sapiens	51704	H. sapiens	GPRC5B	G protein-coupled receptor class C group 5 member B	GO:0060907 positive regulation of macrophage cytokine production;GO:0010934 macrophage cytokine production;GO:0010935 regulation of macrophage cytokine production		Predicted intracellular proteins; G-protein coupled receptors:Family 3 (C) receptors; G-protein coupled receptors:GPCRs excl olfactory receptors	Vesicles (Supported); Additional: Nucleoli;Nucleoplasm			(M5953)HALLMARK KRAS SIGNALING UP	1	0	0	0	0	0	0	0
GPX7	2882	symbol	H. sapiens	2882	H. sapiens	GPX7	glutathione peroxidase 7	GO:0098869 cellular oxidant detoxification;GO:1990748 cellular detoxification;GO:0097237 cellular response to toxic substance		Predicted secreted proteins; Enzymes; ENZYME proteins:Oxidoreductases; Disease related genes; Potential drug targets		Glutathione		(M5930)HALLMARK EPITHELIAL MESENCHYMAL TRANSITION	0	0	0	0	0	0	0	0
HOXB9	3219	symbol	H. sapiens	3219	H. sapiens	HOXB9	homeobox B9	GO:0009954 proximal/distal pattern formation;GO:0048704 embryonic skeletal system morphogenesis;GO:0048706 embryonic skeletal system development		Predicted intracellular proteins; Transcription factors:Helix-turn-helix domains	Nucleoplasm (Supported)			(M5891)HALLMARK HYPOXIA	0	0	0	0	0	0	0	1
HOXC10	3226	symbol	H. sapiens	3226	H. sapiens	HOXC10	homeobox C10	GO:0120163 negative regulation of cold-induced thermogenesis;GO:0106106 cold-induced thermogenesis;GO:0120161 regulation of cold-induced thermogenesis		Predicted intracellular proteins; Transcription factors:Helix-turn-helix domains	Nuclear bodies (Supported); Additional: Nucleoplasm			(M5901)HALLMARK G2M CHECKPOINT	0	0	0	0	0	0	0	0
HOXC13	3229	symbol	H. sapiens	3229	H. sapiens	HOXC13	homeobox C13	GO:0045893 positive regulation of transcription, DNA-templated;GO:1903508 positive regulation of nucleic acid-templated transcription;GO:1902680 positive regulation of RNA biosynthetic process		Predicted intracellular proteins; Disease related genes; Cancer-related genes; Transcription factors:Helix-turn-helix domains					0	0	0	0	0	0	0	0
HOXC13-AS	100874366	symbol	H. sapiens	100874366	H. sapiens	HOXC13-AS	HOXC13 antisense RNA								0	0	0	0	0	0	0	0
HPD	3242	symbol	H. sapiens	3242	H. sapiens	HPD	4-hydroxyphenylpyruvate dioxygenase	GO:0006572 tyrosine catabolic process;GO:0006559 L-phenylalanine catabolic process;GO:1902222 erythrose 4-phosphate/phosphoenolpyruvate family amino acid catabolic process		Predicted intracellular proteins; FDA approved drug targets:Small molecule drugs; Enzymes; ENZYME proteins:Oxidoreductases; Disease related genes	Nuclear speckles (Uncertain)	Nitisinone; DAS869			0	0	0	0	0	0	0	0
IGF1	3479	symbol	H. sapiens	3479	H. sapiens	IGF1	insulin like growth factor 1	GO:0060283 negative regulation of oocyte development;GO:1904073 regulation of trophectodermal cell proliferation;GO:1904075 positive regulation of trophectodermal cell proliferation		Predicted secreted proteins; Disease related genes; RAS pathway related proteins		N,N-Bis(3-(D-gluconamido)propyl)deoxycholamide; N-Dodecyl-N,N-Dimethyl-3-Ammonio-1-Propanesulfonate	(M295)SIG PIP3 SIGNALING IN CARDIAC MYOCTES; (M5883)NABA SECRETED FACTORS; (M5885)NABA MATRISOME ASSOCIATED	(M5909)HALLMARK MYOGENESIS; (M5934)HALLMARK XENOBIOTIC METABOLISM	1	1	1	0	0	0	0	1
IL21-AS1	100996941	symbol	H. sapiens	100996941	H. sapiens	IL21-AS1	IL21 antisense RNA 1								0	0	0	0	0	0	0	0
IQCK	124152	symbol	H. sapiens	124152	H. sapiens	IQCK	IQ motif containing K			Predicted intracellular proteins	Nuclear speckles (Approved); Additional: Cytosol				0	0	0	0	0	0	0	0
KCTD2	23510	symbol	H. sapiens	23510	H. sapiens	KCTD2	potassium channel tetramerization domain containing 2	GO:0051260 protein homooligomerization;GO:0051259 protein complex oligomerization;GO:0043161 proteasome-mediated ubiquitin-dependent protein catabolic process		Predicted intracellular proteins					0	0	0	0	0	0	0	0
LOC101928370	101928370	Gene_ID	H. sapiens	101928370	H. sapiens	LOC101928370	uncharacterized LOC101928370								0	0	0	0	0	0	0	0
LOC101929122	101929122	Gene_ID	H. sapiens	101929122	H. sapiens	FNDC1-AS1	FNDC1 antisense RNA 1								0	0	0	0	0	0	0	0
LOC285043	285043	Gene_ID	H. sapiens	285043	H. sapiens	LINC01936	long intergenic non-protein coding RNA 1936								0	0	0	0	0	0	0	0
LOC653602	151354	Gene_ID	H. sapiens	151354	H. sapiens	LRATD1	LRAT domain containing 1	GO:0000902 cell morphogenesis;GO:0048870 cell motility;GO:0051674 localization of cell		Predicted intracellular proteins	Nucleoplasm (Approved)				0	0	0	0	0	0	0	0
MBD4	8930	symbol	H. sapiens	8930	H. sapiens	MBD4	methyl-CpG binding domain 4, DNA glycosylase	GO:0045008 depyrimidination;GO:0006285 base-excision repair, AP site formation;GO:0009223 pyrimidine deoxyribonucleotide catabolic process		Cancer-related genes:Candidate cancer biomarkers; Predicted intracellular proteins	Nuclear speckles (Supported)				0	0	0	1	0	0	0	0
MPPED2	744	symbol	H. sapiens	744	H. sapiens	MPPED2	metallophosphoesterase domain containing 2			Predicted intracellular proteins	Nucleoli (Approved); Additional: Mitochondria;Vesicles			(M5906)HALLMARK ESTROGEN RESPONSE EARLY	0	0	0	0	0	0	0	0
MYZAP	100820829	symbol	H. sapiens	100820829	H. sapiens	MYZAP	myocardial zonula adherens protein	GO:0035556 intracellular signal transduction;GO:0007165 signal transduction;GO:0023052 signaling		Predicted intracellular proteins					0	0	0	0	0	0	0	0
NDRG2	57447	symbol	H. sapiens	57447	H. sapiens	NDRG2	NDRG family member 2	GO:0090360 platelet-derived growth factor production;GO:0090361 regulation of platelet-derived growth factor production;GO:0021762 substantia nigra development		Predicted intracellular proteins	Centriolar satellite (Approved); Additional: Cytosol;Nucleoplasm		(M254)PID MYC REPRESS PATHWAY	(M5934)HALLMARK XENOBIOTIC METABOLISM	1	1	0	0	0	0	0	0
NEO1	4756	symbol	H. sapiens	4756	H. sapiens	NEO1	neogenin 1	GO:0030513 positive regulation of BMP signaling pathway;GO:0055072 iron ion homeostasis;GO:0030510 regulation of BMP signaling pathway		Cancer-related genes:Candidate cancer biomarkers	Nucleoplasm;Plasma membrane (Approved); Additional: Golgi apparatus				0	0	0	0	0	0	1	0
PITPNM2	57605	symbol	H. sapiens	57605	H. sapiens	PITPNM2	phosphatidylinositol transfer protein membrane associated 2	GO:0120009 intermembrane lipid transfer;GO:0015914 phospholipid transport;GO:0006661 phosphatidylinositol biosynthetic process		Predicted intracellular proteins	Vesicles (Supported)				1	0	0	0	0	0	0	0
PLCE1	51196	symbol	H. sapiens	51196	H. sapiens	PLCE1	phospholipase C epsilon 1	GO:0006651 diacylglycerol biosynthetic process;GO:0046339 diacylglycerol metabolic process;GO:0010592 positive regulation of lamellipodium assembly		RAS pathway related proteins; Predicted intracellular proteins; ENZYME proteins:Hydrolases; Enzymes; Disease related genes; Potential drug targets	Cytosol (Supported)		(M269)PID RAS PATHWAY		1	0	1	1	1	0	0	0
PNLDC1	154197	symbol	H. sapiens	154197	H. sapiens	PNLDC1	PARN like ribonuclease domain containing exonuclease 1	GO:0000289 nuclear-transcribed mRNA poly(A) tail shortening;GO:0000184 nuclear-transcribed mRNA catabolic process, nonsense-mediated decay;GO:0001825 blastocyst formation		ENZYME proteins:Hydrolases; Enzymes					0	0	0	0	0	0	0	1
PRPSAP1	5635	symbol	H. sapiens	5635	H. sapiens	PRPSAP1	phosphoribosyl pyrophosphate synthetase associated protein 1	GO:0006015 5-phosphoribose 1-diphosphate biosynthetic process;GO:0046391 5-phosphoribose 1-diphosphate metabolic process;GO:0046390 ribose phosphate biosynthetic process		Predicted intracellular proteins	Cytosol (Approved)				0	0	0	0	0	0	0	0
PRRG4	79056	symbol	H. sapiens	79056	H. sapiens	PRRG4	proline rich and Gla domain 4	GO:0008150 biological_process			Golgi apparatus (Approved)				0	0	0	0	0	0	0	0
PSTPIP1	9051	symbol	H. sapiens	9051	H. sapiens	PSTPIP1	proline-serine-threonine phosphatase interacting protein 1	GO:0030041 actin filament polymerization;GO:0008154 actin polymerization or depolymerization;GO:0051258 protein polymerization		Predicted intracellular proteins; Disease related genes					0	0	0	0	0	1	0	0
RAET1G	353091	symbol	H. sapiens	353091	H. sapiens	RAET1G	retinoic acid early transcript 1G	GO:0002729 positive regulation of natural killer cell cytokine production;GO:0002370 natural killer cell cytokine production;GO:0002727 regulation of natural killer cell cytokine production		Predicted secreted proteins	Vesicles (Approved)				1	0	0	0	0	0	0	0
RASL11B	65997	symbol	H. sapiens	65997	H. sapiens	RASL11B	RAS like family 11 member B	GO:0030512 negative regulation of transforming growth factor beta receptor signaling pathway;GO:0017015 regulation of transforming growth factor beta receptor signaling pathway;GO:0090101 negative regulation of transmembrane receptor protein serine/threonine kinase signaling pathway		Predicted intracellular proteins	Nuclear bodies (Approved)				0	0	0	0	0	0	1	0
RGS16	6004	symbol	H. sapiens	6004	H. sapiens	RGS16	regulator of G protein signaling 16	GO:0008277 regulation of G protein-coupled receptor signaling pathway;GO:0007601 visual perception;GO:0050953 sensory perception of light stimulus		Predicted intracellular proteins	Cytosol (Approved)			(M5947)HALLMARK IL2 STAT5 SIGNALING; (M5932)HALLMARK INFLAMMATORY RESPONSE; (M5939)HALLMARK P53 PATHWAY	0	0	0	0	1	0	0	0
S1PR1	1901	symbol	H. sapiens	1901	H. sapiens	S1PR1	sphingosine-1-phosphate receptor 1	GO:0003245 cardiac muscle tissue growth involved in heart morphogenesis;GO:0003241 growth involved in heart morphogenesis;GO:0001955 blood vessel maturation		Cancer-related genes:Candidate cancer biomarkers; G-protein coupled receptors:Lysolipids receptors; CD markers; Transporters; FDA approved drug targets:Biotech drugs; G-protein coupled receptors:GPCRs excl olfactory receptors	Vesicles (Supported)	Fingolimod; Asfotase alfa; Siponimod; Ozanimod	(M103)PID S1P S1P1 PATHWAY; (M155)PID S1P META PATHWAY; (M55)PID S1P S1P3 PATHWAY		1	0	1	0	1	0	0	0
SFRP2	6423	symbol	H. sapiens	6423	H. sapiens	SFRP2	secreted frizzled related protein 2	GO:0061185 negative regulation of dermatome development;GO:2000040 regulation of planar cell polarity pathway involved in axis elongation;GO:2000041 negative regulation of planar cell polarity pathway involved in axis elongation		Predicted secreted proteins	Intermediate filaments (Approved)		(M5883)NABA SECRETED FACTORS; (M5885)NABA MATRISOME ASSOCIATED; (M5889)NABA MATRISOME		1	1	0	0	1	0	1	1
SGCG	6445	symbol	H. sapiens	6445	H. sapiens	SGCG	sarcoglycan gamma	GO:0048738 cardiac muscle tissue development;GO:0060047 heart contraction;GO:0003015 heart process		Disease related genes				(M5909)HALLMARK MYOGENESIS; (M5930)HALLMARK EPITHELIAL MESENCHYMAL TRANSITION	1	0	0	0	0	0	0	0
SLC2A9	56606	symbol	H. sapiens	56606	H. sapiens	SLC2A9	solute carrier family 2 member 9	GO:0015747 urate transport;GO:0046415 urate metabolic process;GO:1904659 glucose transmembrane transport		Transporters:Electrochemical Potential-driven transporters; Potential drug targets; Disease related genes					0	0	0	0	0	0	0	0
SPACA6P-AS	102238594	gene_synonym	H. sapiens	102238594	H. sapiens	SPACA6-AS1	SPACA6 antisense RNA 1	GO:0035195 gene silencing by miRNA;GO:0035194 post-transcriptional gene silencing by RNA;GO:0016441 posttranscriptional gene silencing							0	0	0	0	0	0	0	0
TLR5	7100	symbol	H. sapiens	7100	H. sapiens	TLR5	toll like receptor 5	GO:0034146 toll-like receptor 5 signaling pathway;GO:0002755 MyD88-dependent toll-like receptor signaling pathway;GO:0034123 positive regulation of toll-like receptor signaling pathway		Predicted intracellular proteins; Disease related genes	Golgi apparatus (Approved); Additional: Cytosol;Nucleoplasm				1	0	0	0	0	0	0	0
TRPC3	7222	symbol	H. sapiens	7222	H. sapiens	TRPC3	transient receptor potential cation channel subfamily C member 3	GO:0010615 positive regulation of cardiac muscle adaptation;GO:1903244 positive regulation of cardiac muscle hypertrophy in response to stress;GO:0014744 positive regulation of muscle adaptation		Voltage-gated ion channels:Transient Receptor Potential Channels; Predicted intracellular proteins; Disease related genes; Transporters:Transporter channels and pores; Potential drug targets			(M271)PID PI3K PLC TRK PATHWAY		0	0	1	0	1	0	0	0
TSHZ1	10194	symbol	H. sapiens	10194	H. sapiens	TSHZ1	teashirt zinc finger homeobox 1	GO:0060023 soft palate development;GO:0042474 middle ear morphogenesis;GO:0062009 secondary palate development		Predicted intracellular proteins; Disease related genes; Transcription factors:Helix-turn-helix domains	Nucleoplasm (Approved)				0	0	0	0	0	0	0	1
ZADH2	284273	symbol	H. sapiens	284273	H. sapiens	ZADH2	zinc binding alcohol dehydrogenase domain containing 2	GO:0006692 prostanoid metabolic process;GO:0006693 prostaglandin metabolic process;GO:0045599 negative regulation of fat cell differentiation		Predicted intracellular proteins; Enzymes; ENZYME proteins:Oxidoreductases	Vesicles (Approved); Additional: Golgi apparatus;Nucleoplasm				0	1	0	0	0	0	0	0
ZNF331	55422	symbol	H. sapiens	55422	H. sapiens	ZNF331	zinc finger protein 331	GO:0006357 regulation of transcription by RNA polymerase II;GO:0006366 transcription by RNA polymerase II;GO:0006355 regulation of transcription, DNA-templated		Transcription factors:Zinc-coordinating DNA-binding domains; Cancer-related genes; Predicted intracellular proteins	Nucleoplasm (Approved)				0	0	0	0	0	0	0	0

## Sheet: Enrichment
GroupID	Category	Term	Description	LogP	Log(q-value)	InTerm_InList	Genes	Symbols
1_Summary	GO Biological Processes	GO:0043408	regulation of MAPK cascade	-4.97664	-0.615955	9/674	2308,2852,3479,6423,10344,10519,51196,57447,152007,2530,9334,114899,57605,1901,1646,6445,7100,51704,353091,1195	FOXO1,GPER1,IGF1,SFRP2,CCL26,CIB1,PLCE1,NDRG2,GLIPR2,FUT8,B4GALT5,C1QTNF3,PITPNM2,S1PR1,AKR1C2,SGCG,TLR5,GPRC5B,RAET1G,CLK1
1_Member	GO Biological Processes	GO:0043408	regulation of MAPK cascade	-4.97664	-0.615955	9/674	2308,2852,3479,6423,10344,10519,51196,57447,152007	FOXO1,GPER1,IGF1,SFRP2,CCL26,CIB1,PLCE1,NDRG2,GLIPR2
1_Member	GO Biological Processes	GO:0000165	MAPK cascade	-4.49871	-0.467718	9/775	2308,2852,3479,6423,10344,10519,51196,57447,152007	FOXO1,GPER1,IGF1,SFRP2,CCL26,CIB1,PLCE1,NDRG2,GLIPR2
1_Member	GO Biological Processes	GO:0070372	regulation of ERK1 and ERK2 cascade	-4.29131	-0.467718	6/315	2852,3479,10344,10519,57447,152007	GPER1,IGF1,CCL26,CIB1,NDRG2,GLIPR2
1_Member	GO Biological Processes	GO:0016051	carbohydrate biosynthetic process	-4.16988	-0.467718	5/203	2530,2852,3479,9334,114899	FUT8,GPER1,IGF1,B4GALT5,C1QTNF3
1_Member	GO Biological Processes	GO:0070371	ERK1 and ERK2 cascade	-4.12944	-0.467718	6/337	2852,3479,10344,10519,57447,152007	GPER1,IGF1,CCL26,CIB1,NDRG2,GLIPR2
1_Member	GO Biological Processes	GO:0070374	positive regulation of ERK1 and ERK2 cascade	-3.99609	-0.413554	5/221	2852,3479,10344,10519,152007	GPER1,IGF1,CCL26,CIB1,GLIPR2
1_Member	GO Biological Processes	GO:0048016	inositol phosphate-mediated signaling	-3.67347	-0.330903	3/55	3479,10519,51196	IGF1,CIB1,PLCE1
1_Member	GO Biological Processes	GO:0043410	positive regulation of MAPK cascade	-3.29727	-0.147522	6/481	2852,3479,10344,10519,51196,152007	GPER1,IGF1,CCL26,CIB1,PLCE1,GLIPR2
1_Member	GO Biological Processes	GO:0048015	phosphatidylinositol-mediated signaling	-3.28961	-0.147522	4/176	2852,3479,51196,57605	GPER1,IGF1,PLCE1,PITPNM2
1_Member	GO Biological Processes	GO:0048017	inositol lipid-mediated signaling	-3.25294	-0.147522	4/180	2852,3479,51196,57605	GPER1,IGF1,PLCE1,PITPNM2
1_Member	GO Biological Processes	GO:0048660	regulation of smooth muscle cell proliferation	-3.25294	-0.147522	4/180	1901,2852,3479,57447	S1PR1,GPER1,IGF1,NDRG2
1_Member	GO Biological Processes	GO:0048659	smooth muscle cell proliferation	-3.21714	-0.135201	4/184	1901,2852,3479,57447	S1PR1,GPER1,IGF1,NDRG2
1_Member	GO Biological Processes	GO:0043491	protein kinase B signaling	-2.99565	0	4/211	1646,2852,3479,10519	AKR1C2,GPER1,IGF1,CIB1
1_Member	GO Biological Processes	GO:0030335	positive regulation of cell migration	-2.97028	0	6/556	1901,2852,3479,10344,10519,152007	S1PR1,GPER1,IGF1,CCL26,CIB1,GLIPR2
1_Member	GO Biological Processes	GO:0043255	regulation of carbohydrate biosynthetic process	-2.95082	0	3/97	2852,3479,114899	GPER1,IGF1,C1QTNF3
1_Member	GO Biological Processes	GO:0097191	extrinsic apoptotic signaling pathway	-2.93593	0	4/219	2852,3479,6423,10519	GPER1,IGF1,SFRP2,CIB1
1_Member	GO Biological Processes	GO:2000147	positive regulation of cell motility	-2.86883	0	6/582	1901,2852,3479,10344,10519,152007	S1PR1,GPER1,IGF1,CCL26,CIB1,GLIPR2
1_Member	GO Biological Processes	GO:0051272	positive regulation of cellular component movement	-2.8238	0	6/594	1901,2852,3479,10344,10519,152007	S1PR1,GPER1,IGF1,CCL26,CIB1,GLIPR2
1_Member	GO Biological Processes	GO:0007507	heart development	-2.8201	0	6/595	1901,2852,3479,6423,6445,51196	S1PR1,GPER1,IGF1,SFRP2,SGCG,PLCE1
1_Member	GO Biological Processes	GO:0040017	positive regulation of locomotion	-2.8164	0	6/596	1901,2852,3479,10344,10519,152007	S1PR1,GPER1,IGF1,CCL26,CIB1,GLIPR2
1_Member	GO Biological Processes	GO:0033002	muscle cell proliferation	-2.73802	0	4/248	1901,2852,3479,57447	S1PR1,GPER1,IGF1,NDRG2
1_Member	GO Biological Processes	GO:0050714	positive regulation of protein secretion	-2.53168	0	3/136	2852,3479,114899	GPER1,IGF1,C1QTNF3
1_Member	GO Biological Processes	GO:0044262	cellular carbohydrate metabolic process	-2.5254	0	4/284	2852,3479,9334,114899	GPER1,IGF1,B4GALT5,C1QTNF3
1_Member	GO Biological Processes	GO:0010675	regulation of cellular carbohydrate metabolic process	-2.44499	0	3/146	2852,3479,114899	GPER1,IGF1,C1QTNF3
1_Member	GO Biological Processes	GO:0051222	positive regulation of protein transport	-2.43018	0	4/302	2852,3479,10519,114899	GPER1,IGF1,CIB1,C1QTNF3
1_Member	GO Biological Processes	GO:2001236	regulation of extrinsic apoptotic signaling pathway	-2.40402	0	3/151	2852,3479,6423	GPER1,IGF1,SFRP2
1_Member	GO Biological Processes	GO:1904951	positive regulation of establishment of protein localization	-2.3508	0	4/318	2852,3479,10519,114899	GPER1,IGF1,CIB1,C1QTNF3
1_Member	GO Biological Processes	GO:0030307	positive regulation of cell growth	-2.28945	0	3/166	3479,6423,10519	IGF1,SFRP2,CIB1
1_Member	GO Biological Processes	GO:0050728	negative regulation of inflammatory response	-2.21919	0	3/176	2852,3479,114899	GPER1,IGF1,C1QTNF3
1_Member	GO Biological Processes	GO:0006109	regulation of carbohydrate metabolic process	-2.20566	0	3/178	2852,3479,114899	GPER1,IGF1,C1QTNF3
1_Member	GO Biological Processes	GO:0001817	regulation of cytokine production	-2.1914	0	6/799	3479,7100,51704,57447,114899,353091	IGF1,TLR5,GPRC5B,NDRG2,C1QTNF3,RAET1G
1_Member	GO Biological Processes	GO:0051896	regulation of protein kinase B signaling	-2.15961	0	3/185	1646,2852,10519	AKR1C2,GPER1,CIB1
1_Member	GO Biological Processes	GO:0018108	peptidyl-tyrosine phosphorylation	-2.09732	0	4/376	1195,3479,6423,51704	CLK1,IGF1,SFRP2,GPRC5B
1_Member	GO Biological Processes	GO:0005975	carbohydrate metabolic process	-2.09669	0	5/593	2530,2852,3479,9334,114899	FUT8,GPER1,IGF1,B4GALT5,C1QTNF3
1_Member	GO Biological Processes	GO:0018212	peptidyl-tyrosine modification	-2.08547	0	4/379	1195,3479,6423,51704	CLK1,IGF1,SFRP2,GPRC5B
1_Member	GO Biological Processes	GO:0019722	calcium-mediated signaling	-2.05533	0	3/202	3479,10519,51196	IGF1,CIB1,PLCE1
1_Member	GO Biological Processes	GO:0050727	regulation of inflammatory response	-2.04673	0	4/389	2852,3479,51704,114899	GPER1,IGF1,GPRC5B,C1QTNF3
1_Member	GO Biological Processes	GO:0031347	regulation of defense response	-2.00412	0	5/625	2852,3479,51704,114899,353091	GPER1,IGF1,GPRC5B,C1QTNF3,RAET1G
2_Summary	GO Biological Processes	GO:0045444	fat cell differentiation	-3.91486	-0.399272	5/230	2308,2852,6423,114899,284273,57447,10519,3479	FOXO1,GPER1,SFRP2,C1QTNF3,ZADH2,NDRG2,CIB1,IGF1
2_Member	GO Biological Processes	GO:0045444	fat cell differentiation	-3.91486	-0.399272	5/230	2308,2852,6423,114899,284273	FOXO1,GPER1,SFRP2,C1QTNF3,ZADH2
2_Member	GO Biological Processes	GO:0045598	regulation of fat cell differentiation	-3.67862	-0.330903	4/139	2308,2852,6423,284273	FOXO1,GPER1,SFRP2,ZADH2
2_Member	GO Biological Processes	GO:0045599	negative regulation of fat cell differentiation	-3.6502	-0.330903	3/56	2308,2852,284273	FOXO1,GPER1,ZADH2
2_Member	GO Biological Processes	GO:0043409	negative regulation of MAPK cascade	-3.29892	-0.147522	4/175	2308,2852,6423,57447	FOXO1,GPER1,SFRP2,NDRG2
2_Member	GO Biological Processes	GO:1902532	negative regulation of intracellular signal transduction	-3.07324	-0.0135862	6/531	2308,2852,6423,10519,57447,114899	FOXO1,GPER1,SFRP2,CIB1,NDRG2,C1QTNF3
2_Member	GO Biological Processes	GO:0045596	negative regulation of cell differentiation	-2.52068	0	6/683	2308,2852,3479,6423,10519,284273	FOXO1,GPER1,IGF1,SFRP2,CIB1,ZADH2
3_Summary	GO Biological Processes	GO:0090257	regulation of muscle system process	-3.73005	-0.330903	5/252	2308,2852,3479,7222,51196,1901,2530	FOXO1,GPER1,IGF1,TRPC3,PLCE1,S1PR1,FUT8
3_Member	GO Biological Processes	GO:0090257	regulation of muscle system process	-3.73005	-0.330903	5/252	2308,2852,3479,7222,51196	FOXO1,GPER1,IGF1,TRPC3,PLCE1
3_Member	GO Biological Processes	GO:0010611	regulation of cardiac muscle hypertrophy	-3.3821	-0.147522	3/69	2308,3479,7222	FOXO1,IGF1,TRPC3
3_Member	GO Biological Processes	GO:0014743	regulation of muscle hypertrophy	-3.32778	-0.147522	3/72	2308,3479,7222	FOXO1,IGF1,TRPC3
3_Member	GO Biological Processes	GO:0043502	regulation of muscle adaptation	-2.93796	0	3/98	2308,3479,7222	FOXO1,IGF1,TRPC3
3_Member	GO Biological Processes	GO:0003300	cardiac muscle hypertrophy	-2.92524	0	3/99	2308,3479,7222	FOXO1,IGF1,TRPC3
3_Member	GO Biological Processes	GO:0014897	striated muscle hypertrophy	-2.88788	0	3/102	2308,3479,7222	FOXO1,IGF1,TRPC3
3_Member	GO Biological Processes	GO:0014896	muscle hypertrophy	-2.86362	0	3/104	2308,3479,7222	FOXO1,IGF1,TRPC3
3_Member	GO Biological Processes	GO:0043500	muscle adaptation	-2.67551	0	3/121	2308,3479,7222	FOXO1,IGF1,TRPC3
3_Member	GO Biological Processes	GO:0003012	muscle system process	-2.59168	0	5/452	2308,2852,3479,7222,51196	FOXO1,GPER1,IGF1,TRPC3,PLCE1
3_Member	KEGG Pathway	hsa04068	foxo signaling pathway	-2.5227	0	3/137	1901,2308,3479	S1PR1,FOXO1,IGF1
3_Member	GO Biological Processes	GO:0031214	biomineral tissue development	-2.2679	0	3/169	1901,2308,3479	S1PR1,FOXO1,IGF1
3_Member	GO Biological Processes	GO:0110148	biomineralization	-2.25376	0	3/171	1901,2308,3479	S1PR1,FOXO1,IGF1
3_Member	KEGG Pathway	ko05202	Transcriptional misregulation in cancer	-2.1923	0	3/180	2308,2530,3479	FOXO1,FUT8,IGF1
3_Member	GO Biological Processes	GO:0044057	regulation of system process	-2.133	0	5/581	2308,2852,3479,7222,51196	FOXO1,GPER1,IGF1,TRPC3,PLCE1
3_Member	KEGG Pathway	hsa05202	Transcriptional misregulation in cancer	-2.04371	0	3/204	2308,2530,3479	FOXO1,FUT8,IGF1
4_Summary	KEGG Pathway	hsa04919	thyroid hormone signaling pathway	-2.65525	0	3/123	2308,8930,51196	FOXO1,MBD4,PLCE1
4_Member	KEGG Pathway	hsa04919	thyroid hormone signaling pathway	-2.65525	0	3/123	2308,8930,51196	FOXO1,MBD4,PLCE1
5_Summary	GO Biological Processes	GO:0008277	regulation of G protein-coupled receptor signaling pathway	-2.54072	0	3/135	2852,6004,51196,1901,7222,6423,10344	GPER1,RGS16,PLCE1,S1PR1,TRPC3,SFRP2,CCL26
5_Member	GO Biological Processes	GO:0008277	regulation of G protein-coupled receptor signaling pathway	-2.54072	0	3/135	2852,6004,51196	GPER1,RGS16,PLCE1
5_Member	GO Biological Processes	GO:0007204	positive regulation of cytosolic calcium ion concentration	-2.34599	0	4/319	1901,2852,7222,51196	S1PR1,GPER1,TRPC3,PLCE1
5_Member	GO Biological Processes	GO:0051480	regulation of cytosolic calcium ion concentration	-2.18777	0	4/354	1901,2852,7222,51196	S1PR1,GPER1,TRPC3,PLCE1
5_Member	GO Biological Processes	GO:0051345	positive regulation of hydrolase activity	-2.09669	0	5/593	1901,2852,6004,6423,10344	S1PR1,GPER1,RGS16,SFRP2,CCL26
6_Summary	KEGG Pathway	hsa04621	NOD-like receptor signaling pathway	-2.26081	0	3/170	1508,9051,84674	CTSB,PSTPIP1,CARD6
6_Member	KEGG Pathway	hsa04621	NOD-like receptor signaling pathway	-2.26081	0	3/170	1508,9051,84674	CTSB,PSTPIP1,CARD6
6_Member	KEGG Pathway	ko04621	NOD-like receptor signaling pathway	-2.26081	0	3/170	1508,9051,84674	CTSB,PSTPIP1,CARD6
7_Summary	GO Biological Processes	GO:0007178	transmembrane receptor protein serine/threonine kinase signaling pathway	-2.16665	0	4/359	2530,4756,6423,65997	FUT8,NEO1,SFRP2,RASL11B
7_Member	GO Biological Processes	GO:0007178	transmembrane receptor protein serine/threonine kinase signaling pathway	-2.16665	0	4/359	2530,4756,6423,65997	FUT8,NEO1,SFRP2,RASL11B
8_Summary	GO Biological Processes	GO:0009952	anterior/posterior pattern specification	-2.05533	0	3/202	3219,6423,10194,2530,3479,154197	HOXB9,SFRP2,TSHZ1,FUT8,IGF1,PNLDC1
8_Member	GO Biological Processes	GO:0009952	anterior/posterior pattern specification	-2.05533	0	3/202	3219,6423,10194	HOXB9,SFRP2,TSHZ1
8_Member	GO Biological Processes	GO:0043009	chordate embryonic development	-2.03813	0	5/613	2530,3219,3479,6423,154197	FUT8,HOXB9,IGF1,SFRP2,PNLDC1
