# Supplementary material for: Transcriptional profiling of Hutchinson-Gilford Progeria syndrome fibroblasts reveals deficits in mesenchymal stem cell commitment to differentiation related to early events in endochondral ossification
Source: eLife journal article supplement (doi:10.7554/elife.81290), 2022-12-29
Supplement: table1-data1 [file metascape_result.xlsx]

## Sheet: Annotation
MyList	Gene ID	Type	Tax ID	Homologene Gene ID	Homologene Gene Tax ID	Gene Symbol	Description	Biological Process (GO)	Kinase Class (UniProt)	Protein Function (Protein Atlas)	Subcellular Location (Protein Atlas)	Drug (DrugBank)	Canonical Pathways	Hallmark Gene Sets	WP437 EGF/EGFR signaling pathway	GO:0030198 extracellular matrix organizat	GO:0030031 cell projection assembly	GO:0097581 lamellipodium organization	M92 PID ANGIOPOIETIN RECEPTOR PATH	GO:0008610 lipid biosynthetic process	GO:0001953 negative regulation of cell-ma	R-HSA-449147 Signaling by Interleukins	GO:0051668 localization within membrane	R-HSA-76002 Platelet activation, signaling	GO:0001955 blood vessel maturation	ko04015 Rap1 signaling pathway	GO:0097435 supramolecular fiber organizat	GO:0032870 cellular response to hormone s	GO:0040017 positive regulation of locomot	GO:0006897 endocytosis	GO:0010876 lipid localization	GO:0051051 negative regulation of transpo	GO:0050801 ion homeostasis	R-HSA-382551 Transport of small molecules
ABCB4	5244	symbol	H. sapiens	5244	H. sapiens	ABCB4	ATP binding cassette subfamily B member 4	GO:1901557 response to fenofibrate;GO:0099040 ceramide translocation;GO:0099039 sphingolipid translocation		Predicted intracellular proteins; Transporters:Primary Active Transporters; ENZYME proteins:Hydrolases; Enzymes; Disease related genes; Potential drug targets	Actin filaments;Nucleoplasm;Plasma membrane (Approved); Additional: Focal adhesion sites			(M5949)HALLMARK PEROXISOME	0	0	0	0	0	1	0	0	0	0	0	0	0	1	0	0	1	0	0	1
ABI1	10006	symbol	H. sapiens	10006	H. sapiens	ABI1	abl interactor 1	GO:0072673 lamellipodium morphogenesis;GO:0035855 megakaryocyte development;GO:0098751 bone cell development		Predicted intracellular proteins; Disease related genes; Cancer-related genes	Plasma membrane (Approved)		(M277)PID INTEGRIN A4B1 PATHWAY; (M241)PID RAC1 REG PATHWAY; (M156)PID ECADHERIN NASCENT AJ PATHWAY	(M5893)HALLMARK MITOTIC SPINDLE; (M5932)HALLMARK INFLAMMATORY RESPONSE; (M5950)HALLMARK ALLOGRAFT REJECTION	1	0	0	1	1	0	0	0	0	0	0	1	1	0	0	0	0	0	0	0
ABLIM3	22885	symbol	H. sapiens	22885	H. sapiens	ABLIM3	actin binding LIM protein family member 3	GO:1903955 positive regulation of protein targeting to mitochondrion;GO:1903749 positive regulation of establishment of protein localization to mitochondrion;GO:1903214 regulation of protein targeting to mitochondrion		Predicted intracellular proteins	Nucleoplasm;Plasma membrane (Approved); Additional: Cell Junctions				1	0	1	1	0	0	0	0	0	0	0	0	1	0	0	0	0	0	0	0
ACKR3	57007	symbol	H. sapiens	57007	H. sapiens	ACKR3	atypical chemokine receptor 3	GO:1905319 mesenchymal stem cell migration;GO:1905320 regulation of mesenchymal stem cell migration;GO:1905322 positive regulation of mesenchymal stem cell migration		G-protein coupled receptors:Chemokines and chemotactic factors receptors; G-protein coupled receptors:GPCRs excl olfactory receptors; Cancer-related genes	Plasma membrane;Vesicles (Supported)			(M5890)HALLMARK TNFA SIGNALING VIA NFKB; (M5891)HALLMARK HYPOXIA	1	0	0	0	0	0	0	0	0	0	0	0	0	0	1	1	0	0	1	0
ACKR4	51554	symbol	H. sapiens	51554	H. sapiens	ACKR4	atypical chemokine receptor 4	GO:0070098 chemokine-mediated signaling pathway;GO:1990868 response to chemokine;GO:1990869 cellular response to chemokine		G-protein coupled receptors:Chemokines and chemotactic factors receptors; G-protein coupled receptors:GPCRs excl olfactory receptors	Mitochondria;Vesicles (Approved)				0	0	0	0	0	0	0	0	0	0	0	0	0	0	1	1	0	0	1	0
ACSL5	51703	symbol	H. sapiens	51703	H. sapiens	ACSL5	acyl-CoA synthetase long chain family member 5	GO:0010747 positive regulation of long-chain fatty acid import across plasma membrane;GO:0140214 positive regulation of long-chain fatty acid import into cell;GO:0010746 regulation of long-chain fatty acid import across plasma membrane		Enzymes; ENZYME proteins:Ligase	Mitochondria (Supported); Additional: Nucleoplasm			(M5949)HALLMARK PEROXISOME; (M5948)HALLMARK BILE ACID METABOLISM; (M5935)HALLMARK FATTY ACID METABOLISM	0	0	0	0	0	1	0	0	0	0	0	0	0	0	0	0	1	0	0	0
ACSS3	79611	symbol	H. sapiens	79611	H. sapiens	ACSS3	acyl-CoA synthetase short chain family member 3	GO:0046951 ketone body biosynthetic process;GO:0046950 cellular ketone body metabolic process;GO:1902224 ketone body metabolic process		Enzymes; ENZYME proteins:Ligase	Mitochondria (Supported)				0	0	0	0	0	1	0	0	0	0	0	0	0	0	0	0	0	0	0	0
ACVRL1	94	symbol	H. sapiens	94	H. sapiens	ACVRL1	activin A receptor like type 1	GO:0090500 endocardial cushion to mesenchymal transition;GO:0060836 lymphatic endothelial cell differentiation;GO:0001955 blood vessel maturation	TKL Ser/Thr protein kinase family	ENZYME proteins:Transferases; Predicted intracellular proteins; Enzymes; Disease related genes; Potential drug targets; Kinases:TKL Ser/Thr protein kinases		ATP	(M185)PID ALK1 PATHWAY	(M5897)HALLMARK IL6 JAK STAT3 SIGNALING	0	0	0	0	0	0	1	0	0	1	1	0	1	0	0	0	0	0	0	0
ADAM10	102	symbol	H. sapiens	102	H. sapiens	ADAM10	ADAM metallopeptidase domain 10	GO:0051089 constitutive protein ectodomain proteolysis;GO:0097327 response to antineoplastic agent;GO:0098696 regulation of neurotransmitter receptor localization to postsynaptic specialization membrane		CD markers; Transporters:Accessory Factors Involved in Transport; Predicted intracellular proteins; ENZYME proteins:Hydrolases; Enzymes; Disease related genes; Cancer-related genes:Mutational cancer driver genes; Potential drug targets	Plasma membrane (Supported); Additional: Nucleoplasm;Vesicles	XL784	(M70)PID PS1 PATHWAY; (M142)PID AJDISS 2PATHWAY; (M17)PID NOTCH PATHWAY	(M5916)HALLMARK APICAL SURFACE; (M5910)HALLMARK PROTEIN SECRETION	1	1	0	1	1	0	1	0	1	0	0	1	0	0	1	0	0	0	0	0
ADCY7	113	symbol	H. sapiens	113	H. sapiens	ADCY7	adenylate cyclase 7	GO:0006171 cAMP biosynthetic process;GO:0071285 cellular response to lithium ion;GO:0071361 cellular response to ethanol		Predicted intracellular proteins; Enzymes; ENZYME proteins:Lyases	Cytosol (Approved)		(M56)PID LPA4 PATHWAY; (M8)PID ENDOTHELIN PATHWAY; (M15)PID LYSOPHOSPHOLIPID PATHWAY		1	0	0	1	1	1	0	0	0	0	0	1	0	0	0	0	0	0	0	1
ADGRD1	283383	symbol	H. sapiens	283383	H. sapiens	ADGRD1	adhesion G protein-coupled receptor D1	GO:0007189 adenylate cyclase-activating G protein-coupled receptor signaling pathway;GO:0007188 adenylate cyclase-modulating G protein-coupled receptor signaling pathway;GO:0007186 G protein-coupled receptor signaling pathway		Predicted intracellular proteins; G-protein coupled receptors:GPCRs excl olfactory receptors; G-protein coupled receptors:Family 2 (B) receptors	Plasma membrane (Supported); Additional: Nucleoplasm	Onapristone			0	0	0	0	0	0	0	0	0	0	0	0	0	0	0	0	0	0	0	0
ADRA2A	150	symbol	H. sapiens	150	H. sapiens	ADRA2A	adrenoceptor alpha 2A	GO:0071882 phospholipase C-activating adrenergic receptor signaling pathway;GO:0032811 negative regulation of epinephrine secretion;GO:0071881 adenylate cyclase-inhibiting adrenergic receptor signaling pathway		FDA approved drug targets:Small molecule drugs; G-protein coupled receptors:GPCRs excl olfactory receptors		Tramadol; Bethanidine; Ziprasidone; Cabergoline; Dihydroergotamine; Amitriptyline; Clozapine; Norepinephrine; Mirtazapine; Phenylpropanolamine; Loxapine; Pramipexole; Prochlorperazine; Dipivefrin; Prazosin; Chlorpromazine; Brimonidine; Haloperidol; Nortriptyline; Amoxapine; Lamotrigine; Clonidine; Lisuride; Guanabenz; Dexmedetomidine; Trazodone; Epinephrine; Phentolamine; Ergotamine; Tizanidine; …			1	0	0	0	0	0	0	0	0	1	0	0	1	1	1	1	0	1	0	0
ADTRP	84830	symbol	H. sapiens	84830	H. sapiens	ADTRP	androgen dependent TFPI regulating protein	GO:0003332 negative regulation of extracellular matrix constituent secretion;GO:0042758 long-chain fatty acid catabolic process;GO:0003330 regulation of extracellular matrix constituent secretion			Nucleoli (Uncertain)				0	1	0	0	0	0	1	0	0	1	0	0	1	1	1	0	0	1	0	0
AGO4	192670	symbol	H. sapiens	192670	H. sapiens	AGO4	argonaute RISC component 4	GO:0090625 mRNA cleavage involved in gene silencing by siRNA;GO:0035279 mRNA cleavage involved in gene silencing by miRNA;GO:0098795 mRNA cleavage involved in gene silencing		Predicted intracellular proteins	Cytoplasmic bodies (Supported); Additional: Cytosol			(M5898)HALLMARK DNA REPAIR	0	0	0	0	0	0	0	0	0	0	0	0	0	0	0	0	0	0	0	0
AK3	50808	symbol	H. sapiens	50808	H. sapiens	AK3	adenylate kinase 3	GO:0046041 ITP metabolic process;GO:0006172 ADP biosynthetic process;GO:0009136 purine nucleoside diphosphate biosynthetic process		ENZYME proteins:Transferases; Predicted intracellular proteins; Enzymes	Mitochondria (Supported)			(M5898)HALLMARK DNA REPAIR; (M5937)HALLMARK GLYCOLYSIS	0	0	0	0	0	1	0	0	0	1	0	0	0	0	0	0	0	0	0	0
AKAP7	9465	symbol	H. sapiens	9465	H. sapiens	AKAP7	A-kinase anchoring protein 7	GO:0010738 regulation of protein kinase A signaling;GO:0010737 protein kinase A signaling;GO:0050804 modulation of chemical synaptic transmission		Predicted intracellular proteins	Vesicles (Approved)			(M5916)HALLMARK APICAL SURFACE	0	0	0	0	0	0	0	0	0	0	0	0	0	0	0	0	0	0	0	0
AKR1C2	1646	symbol	H. sapiens	1646	H. sapiens	AKR1C2	aldo-keto reductase family 1 member C2	GO:0009753 response to jasmonic acid;GO:0071395 cellular response to jasmonic acid stimulus;GO:0071798 response to prostaglandin D		Predicted intracellular proteins; FDA approved drug targets:Small molecule drugs; Enzymes; ENZYME proteins:Oxidoreductases; Disease related genes	Cytosol;Nucleoplasm (Approved); Additional: Endoplasmic reticulum;Nucleoli fibrillar center	NADH; Ursodeoxycholic acid; Nicotinamide adenine dinucleotide phosphate; Chenodeoxycholic acid; Epitestosterone		(M5934)HALLMARK XENOBIOTIC METABOLISM	0	0	0	0	0	1	0	0	0	0	0	0	0	1	0	0	0	0	0	0
AKR1C3	8644	symbol	H. sapiens	8644	H. sapiens	AKR1C3	aldo-keto reductase family 1 member C3	GO:0006714 sesquiterpenoid metabolic process;GO:0016107 sesquiterpenoid catabolic process;GO:0016487 farnesol metabolic process		Predicted intracellular proteins; Enzymes; ENZYME proteins:Oxidoreductases	Cytosol;Nucleoplasm (Approved); Additional: Endoplasmic reticulum;Nucleoli fibrillar center	NADH; Indomethacin; Androstenedione; Rutin; Prostaglandin D2; Flufenamic acid; Nicotinamide adenine dinucleotide phosphate; 3-carboxamido-1,3,5(10)-estratrien-17(R)-spiro-2'(5',5'-dimethyl-6'oxo)tetrahydropyran		(M5934)HALLMARK XENOBIOTIC METABOLISM	0	0	0	0	0	1	0	0	0	0	0	0	0	1	0	0	0	0	0	0
ALDH1A3	220	symbol	H. sapiens	220	H. sapiens	ALDH1A3	aldehyde dehydrogenase 1 family member A3	GO:0021768 nucleus accumbens development;GO:0060166 olfactory pit development;GO:0070384 Harderian gland development		Predicted intracellular proteins; Enzymes; ENZYME proteins:Oxidoreductases; Disease related genes; Potential drug targets	Nucleoplasm (Supported); Additional: Cytosol	NADH; Vitamin A		(M5908)HALLMARK ANDROGEN RESPONSE; (M5953)HALLMARK KRAS SIGNALING UP	0	0	0	0	0	1	0	0	0	0	0	0	0	0	0	0	0	0	0	0
ALDH9A1	223	symbol	H. sapiens	223	H. sapiens	ALDH9A1	aldehyde dehydrogenase 9 family member A1	GO:0045329 carnitine biosynthetic process;GO:0006578 amino-acid betaine biosynthetic process;GO:0009437 carnitine metabolic process		Predicted intracellular proteins; Enzymes; ENZYME proteins:Oxidoreductases	Cytosol (Approved)	NADH	(M254)PID MYC REPRESS PATHWAY	(M5949)HALLMARK PEROXISOME; (M5948)HALLMARK BILE ACID METABOLISM; (M5935)HALLMARK FATTY ACID METABOLISM	0	0	0	0	0	0	0	0	0	0	0	0	0	0	0	0	0	1	0	0
ANTXR1	84168	symbol	H. sapiens	84168	H. sapiens	ANTXR1	ANTXR cell adhesion molecule 1	GO:1901202 negative regulation of extracellular matrix assembly;GO:1905050 positive regulation of metallopeptidase activity;GO:1903054 negative regulation of extracellular matrix organization		Predicted intracellular proteins; Disease related genes	Vesicles (Uncertain)	MDX-1303	(M267)PID ANTHRAX PATHWAY		0	1	0	0	1	0	1	0	0	0	0	0	1	0	0	0	0	0	0	0
ANXA5	308	symbol	H. sapiens	308	H. sapiens	ANXA5	annexin A5	GO:0050819 negative regulation of coagulation;GO:0050818 regulation of coagulation;GO:0007596 blood coagulation		Transporters:Transporter channels and pores; Predicted intracellular proteins; Potential drug targets; Disease related genes	Nuclear membrane (Approved)	Fluocinolone acetonide; L-Alpha-Glycerophosphorylserine; L-thioproline; K201 free base; sn-glycero-3-phosphoethanolamine; 1,4-Dideoxy-O2-Sulfo-Glucuronic Acid; N,O6-Disulfo-Glucosamine; 1,4-Dideoxy-5-Dehydro-O2-Sulfo-Glucuronic Acid; Copper	(M5880)NABA ECM AFFILIATED; (M5885)NABA MATRISOME ASSOCIATED; (M5889)NABA MATRISOME	(M5892)HALLMARK CHOLESTEROL HOMEOSTASIS; (M5921)HALLMARK COMPLEMENT	0	0	0	0	0	0	0	0	0	1	0	0	0	0	0	0	0	0	0	0
ANXA7	310	symbol	H. sapiens	310	H. sapiens	ANXA7	annexin A7	GO:0051592 response to calcium ion;GO:0061025 membrane fusion;GO:0010038 response to metal ion		Cancer-related genes:Candidate cancer biomarkers; Predicted intracellular proteins	Nucleoplasm (Approved); Additional: Cytosol		(M5880)NABA ECM AFFILIATED; (M5885)NABA MATRISOME ASSOCIATED; (M5889)NABA MATRISOME		0	0	0	0	0	0	0	0	0	0	0	0	0	0	0	0	0	0	0	0
AP3S1	1176	symbol	H. sapiens	1176	H. sapiens	AP3S1	adaptor related protein complex 3 subunit sigma 1	GO:0048490 anterograde synaptic vesicle transport;GO:0099514 synaptic vesicle cytoskeletal transport;GO:0099517 synaptic vesicle transport along microtubule		Predicted intracellular proteins	Vesicles (Approved)			(M5910)HALLMARK PROTEIN SECRETION; (M5926)HALLMARK MYC TARGETS V1	1	0	0	0	0	0	0	0	0	0	0	0	0	1	0	0	0	0	0	0
APBB1IP	54518	symbol	H. sapiens	54518	H. sapiens	APBB1IP	amyloid beta precursor protein binding family B member 1 interacting protein	GO:0002291 T cell activation via T cell receptor contact with antigen bound to MHC molecule on antigen presenting cell;GO:0002286 T cell activation involved in immune response;GO:0002285 lymphocyte activation involved in immune response		Predicted intracellular proteins	Cytosol;Plasma membrane (Enhanced)				0	0	0	0	0	0	1	0	0	1	0	1	0	0	0	0	0	0	0	0
APH1B	83464	symbol	H. sapiens	83464	H. sapiens	APH1B	aph-1 homolog B, gamma-secretase subunit	GO:0007220 Notch receptor processing;GO:0034205 amyloid-beta formation;GO:0050435 amyloid-beta metabolic process					(M251)PID SYNDECAN 3 PATHWAY; (M70)PID PS1 PATHWAY; (M17)PID NOTCH PATHWAY		0	0	0	0	0	0	0	0	0	0	0	1	0	0	0	0	0	0	0	0
APLP2	334	symbol	H. sapiens	334	H. sapiens	APLP2	amyloid beta precursor like protein 2	GO:0010951 negative regulation of endopeptidase activity;GO:0010466 negative regulation of peptidase activity;GO:0045861 negative regulation of proteolysis		Predicted intracellular proteins	Vesicles (Approved)	Zinc; Zinc acetate; Zinc chloride; Zinc sulfate, unspecified form		(M5905)HALLMARK ADIPOGENESIS	0	0	0	0	0	0	0	0	0	1	0	0	0	0	0	0	0	0	0	0
APOD	347	symbol	H. sapiens	347	H. sapiens	APOD	apolipoprotein D	GO:0034443 negative regulation of lipoprotein oxidation;GO:0060588 negative regulation of lipoprotein lipid oxidation;GO:0034439 lipoprotein lipid oxidation		Cancer-related genes:Candidate cancer biomarkers; Candidate cardiovascular disease genes; Predicted secreted proteins	Plasma membrane (Approved)	Vitamin A; Copper		(M5909)HALLMARK MYOGENESIS; (M5953)HALLMARK KRAS SIGNALING UP	1	0	0	0	0	0	1	0	0	1	0	0	1	0	1	0	1	1	0	1
APOL1	8542	symbol	H. sapiens	8542	H. sapiens	APOL1	apolipoprotein L1	GO:0051715 cytolysis in other organism;GO:0051801 cytolysis in other organism involved in symbiotic interaction;GO:0051838 cytolysis by host of symbiont cells		Candidate cardiovascular disease genes; Predicted secreted proteins; Disease related genes		Zinc; Zinc acetate; Zinc chloride; Zinc sulfate, unspecified form			0	0	0	0	0	0	0	0	0	0	0	0	0	0	0	0	1	0	0	0
APPL2	55198	symbol	H. sapiens	55198	H. sapiens	APPL2	adaptor protein, phosphotyrosine interacting with PH domain and leucine zipper 2	GO:1905303 positive regulation of macropinocytosis;GO:0009631 cold acclimation;GO:1905301 regulation of macropinocytosis		Predicted intracellular proteins; Disease related genes					0	0	0	0	0	0	0	0	0	0	0	0	0	1	0	1	0	1	0	0
AQP9	366	symbol	H. sapiens	366	H. sapiens	AQP9	aquaporin 9	GO:0015722 canalicular bile acid transport;GO:1904823 purine nucleobase transmembrane transport;GO:0015855 pyrimidine nucleobase transport		Transporters:Transporter channels and pores				(M5948)HALLMARK BILE ACID METABOLISM; (M5932)HALLMARK INFLAMMATORY RESPONSE; (M5934)HALLMARK XENOBIOTIC METABOLISM	0	0	0	0	0	0	0	0	0	0	0	0	0	1	0	0	1	0	0	1
ARFGEF1	10565	symbol	H. sapiens	10565	H. sapiens	ARFGEF1	ADP ribosylation factor guanine nucleotide exchange factor 1	GO:0090284 positive regulation of protein glycosylation in Golgi;GO:0090283 regulation of protein glycosylation in Golgi;GO:0033578 protein glycosylation in Golgi		Predicted intracellular proteins	Golgi apparatus (Enhanced); Additional: Cytosol;Nucleoplasm			(M5910)HALLMARK PROTEIN SECRETION; (M5893)HALLMARK MITOTIC SPINDLE	0	0	0	0	0	0	0	0	0	1	0	0	1	0	0	0	0	1	0	0
ARHGAP12	94134	symbol	H. sapiens	94134	H. sapiens	ARHGAP12	Rho GTPase activating protein 12	GO:0051058 negative regulation of small GTPase mediated signal transduction;GO:0002011 morphogenesis of an epithelial sheet;GO:0006911 phagocytosis, engulfment		Predicted intracellular proteins					0	0	0	0	0	0	0	0	0	0	0	0	1	0	0	1	0	0	0	0
ARL2BP	23568	symbol	H. sapiens	23568	H. sapiens	ARL2BP	ADP ribosylation factor like GTPase 2 binding protein	GO:0051457 maintenance of protein location in nucleus;GO:0072595 maintenance of protein localization in organelle;GO:0032507 maintenance of protein location in cell		Predicted intracellular proteins; Disease related genes				(M5945)HALLMARK HEME METABOLISM	0	0	0	0	0	0	0	0	0	0	0	0	0	0	0	0	0	0	0	1
ASAP1	50807	symbol	H. sapiens	50807	H. sapiens	ASAP1	ArfGAP with SH3 domain, ankyrin repeat and PH domain 1	GO:1903527 positive regulation of membrane tubulation;GO:1903525 regulation of membrane tubulation;GO:0071803 positive regulation of podosome assembly		Predicted intracellular proteins	Centrosome;Cytosol;Plasma membrane (Approved)		(M243)PID ARF 3PATHWAY; (M281)PID FAK PATHWAY; (M3270)ST INTEGRIN SIGNALING PATHWAY		1	0	1	0	1	0	0	0	0	0	0	0	1	0	0	0	0	0	0	0
ASPA	443	symbol	H. sapiens	443	H. sapiens	ASPA	aspartoacylase	GO:0006533 aspartate catabolic process;GO:0006531 aspartate metabolic process;GO:0009068 aspartate family amino acid catabolic process		Predicted intracellular proteins; ENZYME proteins:Hydrolases; Enzymes; Disease related genes; Potential drug targets	Cytosol (Approved)	Aspartic acid; Zinc; Zinc acetate; Zinc chloride; Zinc sulfate, unspecified form			0	0	0	0	0	0	0	0	0	0	0	0	0	0	0	0	0	0	0	0
ATP1A3	478	symbol	H. sapiens	478	H. sapiens	ATP1A3	ATPase Na+/K+ transporting subunit alpha 3	GO:1903416 response to glycoside;GO:0060075 regulation of resting membrane potential;GO:1990535 neuron projection maintenance		Predicted intracellular proteins; Transporters:Primary Active Transporters; ENZYME proteins:Hydrolases; Enzymes; Disease related genes; Potential drug targets		Ouabain		(M5915)HALLMARK APICAL JUNCTION	0	0	0	0	1	0	0	0	0	0	0	0	0	1	0	0	0	0	1	1
ATP2B1	490	symbol	H. sapiens	490	H. sapiens	ATP2B1	ATPase plasma membrane Ca2+ transporting 1	GO:0071386 cellular response to corticosterone stimulus;GO:0071389 cellular response to mineralocorticoid stimulus;GO:0003056 regulation of vascular associated smooth muscle contraction		ENZYME proteins:Hydrolases; Enzymes	Plasma membrane (Supported)	Halothane	(M195)PID CMYB PATHWAY	(M5942)HALLMARK UV RESPONSE DN; (M5890)HALLMARK TNFA SIGNALING VIA NFKB; (M5932)HALLMARK INFLAMMATORY RESPONSE	0	0	0	0	1	0	0	0	0	1	0	0	0	1	0	0	0	0	1	1
ATP6AP2	10159	symbol	H. sapiens	10159	H. sapiens	ATP6AP2	ATPase H+ transporting accessory protein 2	GO:0021626 central nervous system maturation;GO:0048069 eye pigmentation;GO:0032914 positive regulation of transforming growth factor beta1 production		Predicted intracellular proteins; Potential drug targets; Disease related genes; Transporters:Accessory Factors Involved in Transport			(M77)PID WNT SIGNALING PATHWAY		0	0	0	0	0	0	0	0	0	0	0	0	0	0	0	0	0	0	1	0
ATP8A1	10396	symbol	H. sapiens	10396	H. sapiens	ATP8A1	ATPase phospholipid transporting 8A1	GO:0061092 positive regulation of phospholipid translocation;GO:0061091 regulation of phospholipid translocation;GO:0140331 aminophospholipid translocation		Predicted intracellular proteins; Transporters:Primary Active Transporters; ENZYME proteins:Hydrolases; Enzymes	Vesicles (Supported)	Phosphatidyl serine			0	0	0	0	0	0	0	0	0	0	0	0	0	0	1	0	1	0	0	1
ATP8B4	79895	symbol	H. sapiens	79895	H. sapiens	ATP8B4	ATPase phospholipid transporting 8B4 (putative)	GO:0045332 phospholipid translocation;GO:0034204 lipid translocation;GO:0097035 regulation of membrane lipid distribution		Predicted intracellular proteins; ENZYME proteins:Hydrolases; Enzymes	Nucleoplasm;Vesicles (Uncertain); Additional: Cytosol				0	0	0	0	0	0	0	0	0	0	0	0	0	0	0	0	1	0	0	1
B2M	567	symbol	H. sapiens	567	H. sapiens	B2M	beta-2-microglobulin	GO:0002481 antigen processing and presentation of exogenous protein antigen via MHC class Ib, TAP-dependent;GO:0071283 cellular response to iron(III) ion;GO:1904432 regulation of ferrous iron binding		Cancer-related genes:Candidate cancer biomarkers; Cancer-related genes:Mutated cancer genes; Predicted intracellular proteins; Disease related genes; Cancer-related genes:Mutational cancer driver genes	Golgi apparatus;Plasma membrane (Enhanced); Additional: Cytosol	3-Indolebutyric Acid; N-Formylmethionine; Copper	(M88)PID CD8 TCR PATHWAY; (M54)PID IL12 2PATHWAY; (M272)PID CD8 TCR DOWNSTREAM PATHWAY	(M5911)HALLMARK INTERFERON ALPHA RESPONSE; (M5908)HALLMARK ANDROGEN RESPONSE; (M5913)HALLMARK INTERFERON GAMMA RESPONSE	0	0	0	1	0	0	1	1	0	0	0	0	1	0	0	1	0	0	1	0
BACE1	23621	symbol	H. sapiens	23621	H. sapiens	BACE1	beta-secretase 1	GO:0060134 prepulse inhibition;GO:0071287 cellular response to manganese ion;GO:0050966 detection of mechanical stimulus involved in sensory perception of pain		Transporters:Accessory Factors Involved in Transport; Predicted intracellular proteins; ENZYME proteins:Hydrolases; Enzymes; Peptidases:Aspartic-type peptidases	Plasma membrane (Supported)	MMI-175; CTS-21166; N-[amino(imino)methyl]-2-(2,5-diphenyl-1H-pyrrol-1-yl)acetamide; N-[(5R,14R)-5-AMINO-5,14-DIMETHYL-4-OXO-3-OXA-18-AZATRICYCLO[15.3.1.1~7,11~]DOCOSA-1(21),7(22),8,10,17,19-HEXAEN-19-YL]-N-METHYLMETHANESULFONAMIDE; N-[amino(imino)methyl]-2-[2-(2-chlorophenyl)-4-(4-propoxyphenyl)-3-thienyl]acetamide; 4-(4-FLUOROBENZYL)PIPERIDINE; N-{2-methyl-5-[(6-phenylpyrimidin-4-yl)amino]pheny…			0	0	0	0	0	0	0	0	0	0	0	0	1	1	0	1	0	1	0	0
BBS10	79738	symbol	H. sapiens	79738	H. sapiens	BBS10	Bardet-Biedl syndrome 10	GO:0051131 chaperone-mediated protein complex assembly;GO:0045494 photoreceptor cell maintenance;GO:1905515 non-motile cilium assembly		Predicted intracellular proteins; Disease related genes					0	0	1	0	0	0	0	0	0	0	0	0	0	0	0	0	0	0	0	0
BBS7	55212	symbol	H. sapiens	55212	H. sapiens	BBS7	Bardet-Biedl syndrome 7	GO:0051877 pigment granule aggregation in cell center;GO:1903929 primary palate development;GO:0032402 melanosome transport		Predicted intracellular proteins; Disease related genes					0	0	1	0	0	0	0	0	0	0	0	0	0	0	0	0	0	0	0	0
BCAP29	55973	symbol	H. sapiens	55973	H. sapiens	BCAP29	B cell receptor associated protein 29	GO:0070973 protein localization to endoplasmic reticulum exit site;GO:0070972 protein localization to endoplasmic reticulum;GO:0006888 endoplasmic reticulum to Golgi vesicle-mediated transport		Predicted intracellular proteins; Transporters:Primary Active Transporters	Cytosol (Approved)				0	0	0	0	0	0	0	0	0	0	0	0	0	0	0	0	0	0	0	0
BCAS1	8537	symbol	H. sapiens	8537	H. sapiens	BCAS1	brain enriched myelin associated protein 1	GO:0042552 myelination;GO:0007272 ensheathment of neurons;GO:0008366 axon ensheathment		Predicted intracellular proteins	Vesicles (Approved)				0	0	0	0	0	0	0	0	0	0	0	0	0	0	0	0	0	0	0	0
BCL2L2	599	symbol	H. sapiens	599	H. sapiens	BCL2L2	BCL2 like 2	GO:1905430 cellular response to glycine;GO:1905429 response to glycine;GO:0060011 Sertoli cell proliferation		Cancer-related genes:Candidate cancer biomarkers; Predicted intracellular proteins; Transporters:Transporter channels and pores	Nucleoplasm (Uncertain)	Navitoclax	(M145)PID P53 DOWNSTREAM PATHWAY	(M5902)HALLMARK APOPTOSIS	0	0	0	0	0	0	0	0	0	0	0	0	1	1	0	0	0	0	0	0
BCL6B	255877	symbol	H. sapiens	255877	H. sapiens	BCL6B	BCL6B transcription repressor	GO:0042092 type 2 immune response;GO:0050727 regulation of inflammatory response;GO:0031347 regulation of defense response		Transcription factors:Zinc-coordinating DNA-binding domains; Predicted intracellular proteins	Vesicles (Approved)				0	0	0	0	0	0	0	0	0	0	0	0	0	0	0	0	0	0	0	0
BHLHE41	79365	symbol	H. sapiens	79365	H. sapiens	BHLHE41	basic helix-loop-helix family member e41	GO:0010944 negative regulation of transcription by competitive promoter binding;GO:0010832 negative regulation of myotube differentiation;GO:0051154 negative regulation of striated muscle cell differentiation		Predicted intracellular proteins; Transcription factors:Basic domains	Nucleoplasm (Supported); Additional: Vesicles		(M255)PID HIF1 TFPATHWAY		0	0	0	0	0	0	0	0	0	0	0	0	0	0	0	0	0	0	0	0
BRINP1	1620	symbol	H. sapiens	1620	H. sapiens	BRINP1	BMP/retinoic acid inducible neural specific 1	GO:0042711 maternal behavior;GO:0060746 parental behavior;GO:0007614 short-term memory		Transporters:Transporter channels and pores; Predicted intracellular proteins	Microtubules (Uncertain)				0	0	0	0	0	0	0	0	0	0	0	0	0	1	0	0	0	0	0	0
BVES	11149	symbol	H. sapiens	11149	H. sapiens	BVES	blood vessel epicardial substance	GO:0060931 sinoatrial node cell development;GO:0060921 sinoatrial node cell differentiation;GO:0060926 cardiac pacemaker cell development		Disease related genes	Cell Junctions;Plasma membrane (Supported)				0	0	0	0	0	0	1	0	1	0	0	0	0	0	1	1	0	0	0	0
C10orf11	83938	gene_synonym	H. sapiens	83938	H. sapiens	LRMDA	leucine rich melanocyte differentiation associated	GO:0030318 melanocyte differentiation;GO:0050931 pigment cell differentiation;GO:0048066 developmental pigmentation		Predicted intracellular proteins; Disease related genes	Nucleoplasm (Supported); Additional: Cytosol				0	0	0	0	0	0	0	0	0	0	0	0	0	0	0	0	0	0	0	0
C15orf59	388135	gene_synonym	H. sapiens	388135	H. sapiens	INSYN1	inhibitory synaptic factor 1	GO:0060080 inhibitory postsynaptic potential;GO:0099565 chemical synaptic transmission, postsynaptic;GO:0060078 regulation of postsynaptic membrane potential		Predicted intracellular proteins	Cytosol;Nucleoplasm (Approved)				0	0	0	0	0	0	0	0	0	0	0	0	0	0	0	0	0	0	0	0
C1orf101	257044	gene_synonym	H. sapiens	257044	H. sapiens	CATSPERE	catsper channel auxiliary subunit epsilon								0	0	0	0	0	0	0	0	0	0	0	0	0	0	0	0	0	0	0	0
C1orf21	81563	symbol	H. sapiens	81563	H. sapiens	C1orf21	chromosome 1 open reading frame 21			Predicted intracellular proteins	Cytosol;Nucleoplasm (Approved)				0	0	0	0	0	0	0	0	0	0	0	0	0	0	0	0	0	0	0	0
C1QTNF3	114899	symbol	H. sapiens	114899	H. sapiens	C1QTNF3	C1q and TNF related 3	GO:0070165 positive regulation of adiponectin secretion;GO:0071638 negative regulation of monocyte chemotactic protein-1 production;GO:0070162 adiponectin secretion		Predicted secreted proteins	Golgi apparatus (Approved)		(M5880)NABA ECM AFFILIATED; (M5885)NABA MATRISOME ASSOCIATED; (M5889)NABA MATRISOME		0	0	0	0	0	0	0	0	0	0	0	0	0	0	0	0	0	1	0	0
C1S	716	symbol	H. sapiens	716	H. sapiens	C1S	complement C1s	GO:0006958 complement activation, classical pathway;GO:0002455 humoral immune response mediated by circulating immunoglobulin;GO:0006956 complement activation		FDA approved drug targets:Biotech drugs; Predicted intracellular proteins; Predicted secreted proteins; Peptidases:Serine-type peptidases; ENZYME proteins:Hydrolases; Enzymes; Disease related genes	Nucleoplasm (Approved); Additional: Cytosol	Zinc; 2-(2-Hydroxy-1,1-Dihydroxymethyl-Ethylamino)-Ethanesulfonic Acid; Human C1-esterase inhibitor; Copper; Conestat alfa; Zinc acetate; Zinc chloride; Zinc sulfate, unspecified form		(M5911)HALLMARK INTERFERON ALPHA RESPONSE; (M5946)HALLMARK COAGULATION; (M5913)HALLMARK INTERFERON GAMMA RESPONSE	0	0	0	0	1	0	0	0	0	0	0	0	0	0	0	0	0	0	0	0
C2	717	symbol	H. sapiens	717	H. sapiens	C2	complement C2	GO:2000427 positive regulation of apoptotic cell clearance;GO:2000425 regulation of apoptotic cell clearance;GO:0043277 apoptotic cell clearance		Predicted intracellular proteins; Predicted secreted proteins; Peptidases:Serine-type peptidases; ENZYME proteins:Hydrolases; Enzymes; Disease related genes; Potential drug targets				(M5946)HALLMARK COAGULATION; (M5921)HALLMARK COMPLEMENT; (M5950)HALLMARK ALLOGRAFT REJECTION	0	0	0	0	1	0	0	0	0	0	0	0	0	0	0	1	0	0	0	0
C2orf74	339804	symbol	H. sapiens	339804	H. sapiens	C2orf74	chromosome 2 open reading frame 74			Predicted intracellular proteins	Centrosome (Approved)				0	0	0	0	0	0	0	0	0	0	0	0	0	0	0	0	0	0	0	0
C8orf33	65265	symbol	H. sapiens	65265	H. sapiens	C8orf33	chromosome 8 open reading frame 33			Predicted intracellular proteins	Nucleoplasm;Plasma membrane (Uncertain)				0	0	0	0	0	0	0	0	0	0	0	0	0	0	0	0	0	0	0	0
C8orf46	254778	gene_synonym	H. sapiens	254778	H. sapiens	VXN	vexin	GO:0030182 neuron differentiation;GO:0048699 generation of neurons;GO:0022008 neurogenesis		Predicted intracellular proteins	Nuclear speckles (Approved)				0	0	0	0	0	0	0	0	0	0	0	0	0	0	0	0	0	0	0	0
CA13	377677	symbol	H. sapiens	377677	H. sapiens	CA13	carbonic anhydrase 13	GO:0006730 one-carbon metabolic process;GO:0044281 small molecule metabolic process;GO:0044237 cellular metabolic process		Predicted intracellular proteins; Enzymes; ENZYME proteins:Lyases	Nucleoli (Approved); Additional: Nucleoplasm;Vesicles	Zonisamide; N-(4-chlorobenzyl)-N-methylbenzene-1,4-disulfonamide			0	0	0	0	0	0	0	0	0	0	0	0	0	0	0	0	0	0	0	0
CACNA1G	8913	symbol	H. sapiens	8913	H. sapiens	CACNA1G	calcium voltage-gated channel subunit alpha1 G	GO:0010045 response to nickel cation;GO:0086046 membrane depolarization during SA node cell action potential;GO:0086045 membrane depolarization during AV node cell action potential		FDA approved drug targets:Small molecule drugs; Disease related genes; Voltage-gated ion channels:Voltage-Gated Calcium Channels		Trimethadione; Cinnarizine; Ethosuximide; Verapamil; Zonisamide; Nifedipine; Mibefradil; Flunarizine; Methsuximide; Cannabidiol; Trimebutine; Benidipine; Manidipine; Bioallethrin; Medical Cannabis; Nabiximols	(M223)PID BETA CATENIN NUC PATHWAY		0	0	0	0	1	0	0	0	0	0	0	0	1	0	0	1	0	1	1	0
CADM3	57863	symbol	H. sapiens	57863	H. sapiens	CADM3	cell adhesion molecule 3	GO:0007157 heterophilic cell-cell adhesion via plasma membrane cell adhesion molecules;GO:0007156 homophilic cell adhesion via plasma membrane adhesion molecules;GO:0098742 cell-cell adhesion via plasma-membrane adhesion molecules		Predicted intracellular proteins	Cytosol (Approved)			(M5915)HALLMARK APICAL JUNCTION	0	0	0	0	0	0	0	0	0	0	0	0	0	0	0	0	0	0	0	0
CAPG	822	symbol	H. sapiens	822	H. sapiens	CAPG	capping actin protein, gelsolin like	GO:0071803 positive regulation of podosome assembly;GO:0071801 regulation of podosome assembly;GO:0051014 actin filament severing		Predicted intracellular proteins	Nucleoplasm (Enhanced)			(M5947)HALLMARK IL2 STAT5 SIGNALING; (M5930)HALLMARK EPITHELIAL MESENCHYMAL TRANSITION; (M5950)HALLMARK ALLOGRAFT REJECTION	0	1	1	0	0	0	0	0	0	0	0	0	1	0	0	0	0	0	0	0
CARD6	84674	symbol	H. sapiens	84674	H. sapiens	CARD6	caspase recruitment domain family member 6	GO:0042981 regulation of apoptotic process;GO:0043067 regulation of programmed cell death;GO:0010941 regulation of cell death		Predicted intracellular proteins					0	0	0	0	1	0	0	0	0	0	0	0	0	0	0	0	0	0	0	0
CASC2	255082	symbol	H. sapiens	255082	H. sapiens	CASC2	cancer susceptibility 2	GO:0002357 defense response to tumor cell;GO:0002347 response to tumor cell;GO:0043280 positive regulation of cysteine-type endopeptidase activity involved in apoptotic process							0	0	0	0	0	0	0	0	0	0	0	0	0	0	0	0	0	0	0	0
CASP10	843	symbol	H. sapiens	843	H. sapiens	CASP10	caspase 10	GO:0006919 activation of cysteine-type endopeptidase activity involved in apoptotic process;GO:0097194 execution phase of apoptosis;GO:0043280 positive regulation of cysteine-type endopeptidase activity involved in apoptotic process		Cancer-related genes:Candidate cancer biomarkers; Peptidases:Cysteine-type peptidases; Predicted intracellular proteins; ENZYME proteins:Hydrolases; Enzymes; Disease related genes; Potential drug targets	Golgi apparatus (Approved); Additional: Vesicles		(M7997)SA CASPASE CASCADE; (M79)PID TRAIL PATHWAY; (M94)PID FAS PATHWAY	(M5921)HALLMARK COMPLEMENT	0	0	0	0	1	0	0	0	0	0	0	0	0	0	0	0	0	0	0	0
CBLL1	79872	symbol	H. sapiens	79872	H. sapiens	CBLL1	Cbl proto-oncogene like 1	GO:0080009 mRNA methylation;GO:0016556 mRNA modification;GO:0001510 RNA methylation		ENZYME proteins:Transferases; Predicted intracellular proteins; Enzymes	Nuclear speckles (Supported)		(M142)PID AJDISS 2PATHWAY		0	0	0	0	0	0	1	0	0	0	0	0	0	0	1	1	0	0	0	0
CBX7	23492	symbol	H. sapiens	23492	H. sapiens	CBX7	chromobox 7	GO:0006325 chromatin organization;GO:0000122 negative regulation of transcription by RNA polymerase II;GO:0051276 chromosome organization		Predicted intracellular proteins	Nucleoplasm (Supported); Additional: Cytosol				0	0	0	0	0	0	0	0	0	0	0	0	0	0	0	0	0	0	0	0
CCDC125	202243	symbol	H. sapiens	202243	H. sapiens	CCDC125	coiled-coil domain containing 125	GO:0035024 negative regulation of Rho protein signal transduction;GO:0046580 negative regulation of Ras protein signal transduction;GO:0051058 negative regulation of small GTPase mediated signal transduction		Predicted intracellular proteins	Intermediate filaments;Nuclear membrane (Uncertain); Additional: Nucleoplasm				0	0	0	0	0	0	0	0	0	0	0	0	0	0	0	0	0	0	0	0
CCDC136	64753	symbol	H. sapiens	64753	H. sapiens	CCDC136	coiled-coil domain containing 136	GO:0001675 acrosome assembly;GO:0033363 secretory granule organization;GO:0010927 cellular component assembly involved in morphogenesis		Predicted intracellular proteins	Golgi apparatus;Vesicles (Approved); Additional: Plasma membrane				0	0	0	0	0	0	0	0	0	0	0	0	0	0	0	0	0	0	0	0
CCDC80	151887	symbol	H. sapiens	151887	H. sapiens	CCDC80	coiled-coil domain containing 80	GO:0010811 positive regulation of cell-substrate adhesion;GO:0010810 regulation of cell-substrate adhesion;GO:0030198 extracellular matrix organization		Predicted intracellular proteins; Predicted secreted proteins					0	1	0	0	0	0	1	0	0	0	0	0	0	0	0	0	0	0	0	0
CCDC93	54520	symbol	H. sapiens	54520	H. sapiens	CCDC93	coiled-coil domain containing 93	GO:0006893 Golgi to plasma membrane transport;GO:0032456 endocytic recycling;GO:0006892 post-Golgi vesicle-mediated transport		Predicted intracellular proteins	Vesicles (Enhanced); Additional: Plasma membrane				0	0	0	0	0	0	0	0	1	0	0	0	0	0	0	0	0	0	0	0
CCL28	56477	symbol	H. sapiens	56477	H. sapiens	CCL28	C-C motif chemokine ligand 28	GO:1903237 negative regulation of leukocyte tethering or rolling;GO:0002692 negative regulation of cellular extravasation;GO:1904995 negative regulation of leukocyte adhesion to vascular endothelial cell		Predicted intracellular proteins; Predicted secreted proteins			(M5883)NABA SECRETED FACTORS; (M5885)NABA MATRISOME ASSOCIATED; (M5889)NABA MATRISOME		0	0	0	0	1	0	1	0	0	0	0	0	0	0	1	0	0	0	1	0
CCNDBP1	23582	symbol	H. sapiens	23582	H. sapiens	CCNDBP1	cyclin D1 binding protein 1	GO:0051726 regulation of cell cycle;GO:0007049 cell cycle;GO:0050794 regulation of cellular process		Predicted intracellular proteins	Nucleoplasm (Enhanced); Additional: Nuclear bodies				0	0	0	0	0	0	0	0	0	0	0	0	0	0	0	0	0	0	0	0
CD109	135228	symbol	H. sapiens	135228	H. sapiens	CD109	CD109 molecule	GO:0072675 osteoclast fusion;GO:0072674 multinuclear osteoclast differentiation;GO:0010839 negative regulation of keratinocyte proliferation		CD markers	Plasma membrane (Supported); Additional: Cytosol		(M3468)NABA ECM REGULATORS; (M5885)NABA MATRISOME ASSOCIATED; (M5889)NABA MATRISOME		0	0	0	0	0	0	0	0	0	1	0	0	0	0	0	0	0	0	0	0
CD68	968	symbol	H. sapiens	968	H. sapiens	CD68	CD68 molecule	GO:0002605 negative regulation of dendritic cell antigen processing and presentation;GO:0035425 autocrine signaling;GO:0002578 negative regulation of antigen processing and presentation		Predicted intracellular proteins; CD markers	Golgi apparatus;Vesicles (Supported)				0	0	0	0	0	0	0	0	0	0	0	0	0	1	0	0	0	0	0	0
CD72	971	symbol	H. sapiens	971	H. sapiens	CD72	CD72 molecule	GO:0007155 cell adhesion;GO:0022610 biological adhesion;GO:0009987 cellular process		Predicted intracellular proteins; CD markers	Mitochondria;Nucleoplasm (Approved)		(M10)PID BCR 5PATHWAY		0	0	0	0	1	0	0	0	0	0	0	0	0	0	0	0	0	0	0	0
CDADC1	81602	symbol	H. sapiens	81602	H. sapiens	CDADC1	cytidine and dCMP deaminase domain containing 1	GO:0070383 DNA cytosine deamination;GO:0006216 cytidine catabolic process;GO:0009972 cytidine deamination		Predicted intracellular proteins	Nucleoplasm (Approved)			(M5953)HALLMARK KRAS SIGNALING UP	0	0	0	0	0	0	0	0	0	0	0	0	0	0	0	0	0	0	0	0
CDC14B	8555	symbol	H. sapiens	8555	H. sapiens	CDC14B	cell division cycle 14B	GO:1904668 positive regulation of ubiquitin protein ligase activity;GO:0007096 regulation of exit from mitosis;GO:1904666 regulation of ubiquitin protein ligase activity		Predicted intracellular proteins; ENZYME proteins:Hydrolases; Enzymes	Nucleoplasm (Supported)		(M129)PID PLK1 PATHWAY	(M5908)HALLMARK ANDROGEN RESPONSE	0	0	1	0	0	0	0	0	0	0	0	0	0	0	0	0	0	0	0	0
CDKL1	8814	symbol	H. sapiens	8814	H. sapiens	CDKL1	cyclin dependent kinase like 1	GO:1902017 regulation of cilium assembly;GO:1902115 regulation of organelle assembly;GO:0120032 regulation of plasma membrane bounded cell projection assembly	CMGC Ser/Thr protein kinase family	ENZYME proteins:Transferases; Predicted intracellular proteins; Kinases:CMGC Ser/Thr protein kinases; Enzymes	Nucleoplasm;Vesicles (Enhanced)	Fostamatinib			0	0	1	1	0	0	0	0	0	0	0	0	0	0	0	0	0	0	0	0
CDON	50937	symbol	H. sapiens	50937	H. sapiens	CDON	cell adhesion associated, oncogene regulated	GO:0045663 positive regulation of myoblast differentiation;GO:0045661 regulation of myoblast differentiation;GO:0045445 myoblast differentiation		Predicted intracellular proteins; Disease related genes			(M211)PID HEDGEHOG 2PATHWAY	(M5942)HALLMARK UV RESPONSE DN	0	0	0	0	0	0	0	0	0	0	0	0	0	0	0	0	0	0	0	0
CELF2	10659	symbol	H. sapiens	10659	H. sapiens	CELF2	CUGBP Elav-like family member 2	GO:0006376 mRNA splice site selection;GO:0000381 regulation of alternative mRNA splicing, via spliceosome;GO:0000380 alternative mRNA splicing, via spliceosome		Predicted intracellular proteins	Nucleoplasm (Supported); Additional: Midbody ring;Vesicles			(M5942)HALLMARK UV RESPONSE DN	0	0	0	0	0	0	0	0	0	0	0	0	0	0	0	0	0	0	0	0
CELF2-AS1	414196	symbol	H. sapiens	414196	H. sapiens	CELF2-AS1	CELF2 antisense RNA 1								0	0	0	0	0	0	0	0	0	0	0	0	0	0	0	0	0	0	0	0
CEP126	57562	symbol	H. sapiens	57562	H. sapiens	CEP126	centrosomal protein 126	GO:1905515 non-motile cilium assembly;GO:0031122 cytoplasmic microtubule organization;GO:0007052 mitotic spindle organization		Predicted intracellular proteins	Cytosol;Nucleoplasm (Uncertain)				0	0	1	0	0	0	0	0	0	0	0	0	1	0	0	0	0	0	0	0
CEP162	22832	symbol	H. sapiens	22832	H. sapiens	CEP162	centrosomal protein 162	GO:0060271 cilium assembly;GO:0044782 cilium organization;GO:0120031 plasma membrane bounded cell projection assembly		Predicted intracellular proteins	Cytosol;Plasma membrane (Enhanced); Additional: Nucleoplasm				0	0	1	0	0	0	0	0	0	0	0	0	0	0	0	0	0	0	0	0
CEP44	80817	symbol	H. sapiens	80817	H. sapiens	CEP44	centrosomal protein 44	GO:0010457 centriole-centriole cohesion;GO:0007099 centriole replication;GO:0098534 centriole assembly		Predicted intracellular proteins					0	0	1	0	0	0	0	0	0	0	0	0	0	0	0	0	0	0	0	0
CERKL	375298	symbol	H. sapiens	375298	H. sapiens	CERKL	ceramide kinase like	GO:0046834 lipid phosphorylation;GO:0030148 sphingolipid biosynthetic process;GO:0046467 membrane lipid biosynthetic process		Predicted intracellular proteins; Disease related genes	Cytosol;Nucleoplasm (Approved)				0	0	0	0	0	1	0	0	0	0	0	0	0	0	0	0	0	0	0	0
CFL2	1073	symbol	H. sapiens	1073	H. sapiens	CFL2	cofilin 2	GO:0030043 actin filament fragmentation;GO:0030836 positive regulation of actin filament depolymerization;GO:0051014 actin filament severing		Predicted intracellular proteins; Disease related genes	Cytosol;Nucleoplasm (Approved); Additional: Plasma membrane		(M16801)SIG REGULATION OF THE ACTIN CYTOSKELETON BY RHO GTPASES; (M5193)SIG CHEMOTAXIS; (M220)PID CASPASE PATHWAY		0	1	0	0	1	0	1	0	0	0	0	0	1	0	0	0	0	0	0	0
CLDN7	1366	symbol	H. sapiens	1366	H. sapiens	CLDN7	claudin 7	GO:0016338 calcium-independent cell-cell adhesion via plasma membrane cell-adhesion molecules;GO:0070830 bicellular tight junction assembly;GO:0120192 tight junction assembly		Cancer-related genes:Candidate cancer biomarkers; Predicted intracellular proteins; Transporters:Transporter channels and pores	Vesicles (Approved); Additional: Cell Junctions			(M5906)HALLMARK ESTROGEN RESPONSE EARLY; (M5915)HALLMARK APICAL JUNCTION	0	0	0	0	1	0	1	0	0	0	0	0	0	0	0	0	0	0	0	0
CLEC12A	160364	symbol	H. sapiens	160364	H. sapiens	CLEC12A	C-type lectin domain family 12 member A			Predicted intracellular proteins			(M5880)NABA ECM AFFILIATED; (M5885)NABA MATRISOME ASSOCIATED; (M5889)NABA MATRISOME		0	0	0	0	0	0	0	0	0	0	0	0	0	0	0	0	0	0	0	0
CLEC2B	9976	symbol	H. sapiens	9976	H. sapiens	CLEC2B	C-type lectin domain family 2 member B			Predicted intracellular proteins			(M5880)NABA ECM AFFILIATED; (M5885)NABA MATRISOME ASSOCIATED; (M5889)NABA MATRISOME		0	0	0	0	0	0	0	0	0	0	0	0	0	0	0	0	0	0	0	0
CLIC2	1193	symbol	H. sapiens	1193	H. sapiens	CLIC2	chloride intracellular channel 2	GO:0060315 negative regulation of ryanodine-sensitive calcium-release channel activity;GO:0051280 negative regulation of release of sequestered calcium ion into cytosol;GO:0051284 positive regulation of sequestering of calcium ion		Transporters:Transporter channels and pores; Predicted intracellular proteins; Potential drug targets; Disease related genes	Cytosol;Plasma membrane (Supported); Additional: Nucleoplasm			(M5945)HALLMARK HEME METABOLISM	0	0	0	0	0	0	0	0	0	0	0	0	0	0	0	0	0	1	1	1
CLK1	1195	symbol	H. sapiens	1195	H. sapiens	CLK1	CDC like kinase 1	GO:0018107 peptidyl-threonine phosphorylation;GO:0018210 peptidyl-threonine modification;GO:0043484 regulation of RNA splicing	CMGC Ser/Thr protein kinase family	ENZYME proteins:Transferases; Predicted intracellular proteins; Kinases:CMGC Ser/Thr protein kinases; Enzymes	Nuclear membrane;Nucleoplasm (Supported)	Debromohymenialdisine; CHGN111; ethyl 3-[(E)-2-amino-1-cyanoethenyl]-6,7-dichloro-1-methyl-1H-indole-2-carboxylate; Fostamatinib			0	0	0	0	0	0	0	0	0	0	0	0	0	0	0	0	0	0	0	0
CLK4	57396	symbol	H. sapiens	57396	H. sapiens	CLK4	CDC like kinase 4	GO:0043484 regulation of RNA splicing;GO:0046777 protein autophosphorylation;GO:0018108 peptidyl-tyrosine phosphorylation	CMGC Ser/Thr protein kinase family	ENZYME proteins:Transferases; Predicted intracellular proteins; Kinases:CMGC Ser/Thr protein kinases; Enzymes	Actin filaments (Approved)	Fostamatinib			0	0	0	0	0	0	0	0	0	0	0	0	0	0	0	0	0	0	0	0
CMYA5	202333	symbol	H. sapiens	202333	H. sapiens	CMYA5	cardiomyopathy associated 5			Predicted intracellular proteins	Cytosol;Nuclear speckles (Approved); Additional: Plasma membrane;Vesicles				0	0	0	0	0	0	0	0	0	0	0	0	0	0	0	0	0	0	0	0
CNTN3	5067	symbol	H. sapiens	5067	H. sapiens	CNTN3	contactin 3	GO:0007155 cell adhesion;GO:0022610 biological adhesion;GO:0007399 nervous system development		Predicted intracellular proteins					0	0	0	0	0	0	0	0	0	0	0	0	0	0	0	0	0	0	0	0
COLGALT2	23127	symbol	H. sapiens	23127	H. sapiens	COLGALT2	collagen beta(1-O)galactosyltransferase 2	GO:0030199 collagen fibril organization;GO:0030198 extracellular matrix organization;GO:0043062 extracellular structure organization		ENZYME proteins:Transferases; Predicted intracellular proteins; Enzymes	Nucleoplasm (Approved); Additional: Vesicles				0	1	0	0	0	0	0	0	0	0	0	0	1	0	0	0	0	0	0	0
CPED1	79974	symbol	H. sapiens	79974	H. sapiens	CPED1	cadherin like and PC-esterase domain containing 1			Predicted intracellular proteins	Nucleoplasm (Approved)				0	0	0	0	0	0	0	0	0	0	0	0	0	0	0	0	0	0	0	0
CPNE8	144402	symbol	H. sapiens	144402	H. sapiens	CPNE8	copine 8	GO:0071277 cellular response to calcium ion;GO:0051592 response to calcium ion;GO:0071248 cellular response to metal ion		Predicted intracellular proteins					0	0	0	0	0	0	0	0	0	0	0	0	0	0	0	0	0	0	0	0
CPOX	1371	symbol	H. sapiens	1371	H. sapiens	CPOX	coproporphyrinogen oxidase	GO:0006782 protoporphyrinogen IX biosynthetic process;GO:0046501 protoporphyrinogen IX metabolic process;GO:0006783 heme biosynthetic process		Enzymes; Potential drug targets; ENZYME proteins:Oxidoreductases; Disease related genes	Mitochondria (Enhanced)			(M5935)HALLMARK FATTY ACID METABOLISM; (M5945)HALLMARK HEME METABOLISM	0	0	0	0	0	0	0	0	0	0	0	0	0	0	0	0	0	0	0	0
CTSB	1508	symbol	H. sapiens	1508	H. sapiens	CTSB	cathepsin B	GO:0097067 cellular response to thyroid hormone stimulus;GO:0006590 thyroid hormone generation;GO:0097066 response to thyroid hormone		Cancer-related genes:Candidate cancer biomarkers; Peptidases:Cysteine-type peptidases; Candidate cardiovascular disease genes; Predicted secreted proteins; ENZYME proteins:Hydrolases; Enzymes	Vesicles (Supported); Additional: Nucleoli	2-Aminoethanimidic Acid; 3-Amino-4-Oxybenzyl-2-Butanone; 3-Methylphenylalanine; N-(3-Propylcarbamoyloxirane-2-Carbonyl)-Isoleucyl-Proline; 2-Pyridinethiol; Diphenylacetic acid; N-[1-Hydroxycarboxyethyl-Carbonyl]Leucylamino-2-Methyl-Butane; N-{[(2S,3S)-3-(Ethoxycarbonyl)-2-oxiranyl]carbonyl}-L-threonyl-L-isoleucine; N-{[(2S,3S)-3-(ETHOXYCARBONYL)OXIRAN-2-YL]CARBONYL}-L-ISOLEUCINE; BENZYL N-({(2S,3…	(M3468)NABA ECM REGULATORS; (M5885)NABA MATRISOME ASSOCIATED; (M5889)NABA MATRISOME	(M5946)HALLMARK COAGULATION; (M5921)HALLMARK COMPLEMENT; (M5945)HALLMARK HEME METABOLISM	0	1	0	0	1	0	0	0	0	0	0	0	0	1	0	0	0	0	0	0
CTSS	1520	symbol	H. sapiens	1520	H. sapiens	CTSS	cathepsin S	GO:0034769 basement membrane disassembly;GO:0097067 cellular response to thyroid hormone stimulus;GO:0010447 response to acidic pH		Predicted intracellular proteins; Peptidases:Cysteine-type peptidases; ENZYME proteins:Hydrolases; Enzymes	Vesicles (Approved)	Morpholine-4-Carboxylic Acid [1s-(2-Benzyloxy-1r-Cyano-Ethylcarbamoyl)-3-Methyl-Butyl]Amide; Morpholine-4-Carboxylic Acid (1-(3-Benzenesulfonyl-1-Phenethylallylcarbamoyl)-3-Methylbutyl)-Amide; Morpholine-4-Carboxylic Acid [1-(2-Benzylsulfanyl-1-Formyl-Ethylcarbamoyl)-2-Phenyl-Ethyl]-Amide; N-[1-(AMINOMETHYL)CYCLOPROPYL]-3-(MORPHOLIN-4-YLSULFONYL)-N~2~-[(1S)-2,2,2-TRIFLUORO-1-(4-FLUOROPHENYL)ETHYL…	(M3468)NABA ECM REGULATORS; (M5885)NABA MATRISOME ASSOCIATED; (M5889)NABA MATRISOME	(M5921)HALLMARK COMPLEMENT; (M5950)HALLMARK ALLOGRAFT REJECTION; (M5953)HALLMARK KRAS SIGNALING UP	0	1	0	0	1	0	0	0	0	0	0	0	0	1	0	0	0	0	0	0
CYB5A	1528	symbol	H. sapiens	1528	H. sapiens	CYB5A	cytochrome b5 type A	GO:0046686 response to cadmium ion;GO:1902600 proton transmembrane transport;GO:0022900 electron transport chain		Predicted intracellular proteins; Disease related genes	Cytosol;Vesicles (Enhanced)	Dimethyl Propionate Ester Heme; Chromium; Chromic citrate; Chromic nitrate; Chromium gluconate; Chromium nicotinate; Chromous sulfate		(M5934)HALLMARK XENOBIOTIC METABOLISM; (M5936)HALLMARK OXIDATIVE PHOSPHORYLATION; (M5937)HALLMARK GLYCOLYSIS	0	0	0	0	0	0	0	0	0	0	0	0	0	0	0	0	0	0	0	0
CYBRD1	79901	symbol	H. sapiens	79901	H. sapiens	CYBRD1	cytochrome b reductase 1	GO:0033215 reductive iron assimilation;GO:0140576 ascorbate homeostasis;GO:0033212 iron import into cell			Plasma membrane (Supported)				0	0	0	0	0	0	0	0	0	0	0	0	0	0	0	0	0	0	1	1
CYP26B1	56603	symbol	H. sapiens	56603	H. sapiens	CYP26B1	cytochrome P450 family 26 subfamily B member 1	GO:0035981 tongue muscle cell differentiation;GO:2001035 regulation of tongue muscle cell differentiation;GO:2001037 positive regulation of tongue muscle cell differentiation		Predicted intracellular proteins; Disease related genes	Cytosol (Approved)	Tretinoin		(M5906)HALLMARK ESTROGEN RESPONSE EARLY; (M5907)HALLMARK ESTROGEN RESPONSE LATE	0	0	0	0	0	0	0	0	0	1	0	0	0	1	0	0	0	0	0	0
CYP39A1	51302	symbol	H. sapiens	51302	H. sapiens	CYP39A1	cytochrome P450 family 39 subfamily A member 1	GO:0006707 cholesterol catabolic process;GO:0016127 sterol catabolic process;GO:0006706 steroid catabolic process		Enzymes; ENZYME proteins:Oxidoreductases				(M5948)HALLMARK BILE ACID METABOLISM; (M5956)HALLMARK KRAS SIGNALING DN	0	0	0	0	0	1	0	0	0	0	0	0	0	0	0	0	0	0	0	0
CYP3A5	1577	symbol	H. sapiens	1577	H. sapiens	CYP3A5	cytochrome P450 family 3 subfamily A member 5	GO:0009822 alkaloid catabolic process;GO:0002933 lipid hydroxylation;GO:0043385 mycotoxin metabolic process		Cancer-related genes:Candidate cancer biomarkers; Predicted intracellular proteins; Enzymes; ENZYME proteins:Oxidoreductases	Cytosol (Approved); Additional: Vesicles	Cannabidiol; Nabiximols			0	0	0	0	0	0	0	0	0	0	0	0	0	0	0	0	0	0	0	0
DCAF12	25853	symbol	H. sapiens	25853	H. sapiens	DCAF12	DDB1 and CUL4 associated factor 12	GO:0140627 ubiquitin-dependent protein catabolic process via the C-end degron rule pathway;GO:0010506 regulation of autophagy;GO:0043161 proteasome-mediated ubiquitin-dependent protein catabolic process		Predicted intracellular proteins					0	0	0	0	0	0	0	0	0	0	0	0	0	0	0	0	0	0	0	0
DCDC5	341019	gene_synonym	H. sapiens	341019	H. sapiens	DCDC1	doublecortin domain containing 1	GO:1902412 regulation of mitotic cytokinesis;GO:0000281 mitotic cytokinesis;GO:0032465 regulation of cytokinesis		Cancer-related genes:Candidate cancer biomarkers; Predicted intracellular proteins					0	0	0	0	0	0	0	0	0	0	0	0	0	0	0	0	0	0	0	0
DCHS2	54798	symbol	H. sapiens	54798	H. sapiens	DCHS2	dachsous cadherin-related 2	GO:0072137 condensed mesenchymal cell proliferation;GO:0010463 mesenchymal cell proliferation;GO:0072006 nephron development			Plasma membrane;Vesicles (Approved)				0	0	0	0	0	0	0	0	0	0	0	0	0	0	0	0	0	0	0	0
DCUN1D2	55208	symbol	H. sapiens	55208	H. sapiens	DCUN1D2	defective in cullin neddylation 1 domain containing 2	GO:2000436 positive regulation of protein neddylation;GO:2000434 regulation of protein neddylation;GO:0045116 protein neddylation		Predicted intracellular proteins	Cytosol;Plasma membrane (Approved)				0	0	0	0	0	0	0	0	0	0	0	0	0	0	0	0	0	0	0	0
DKK2	27123	symbol	H. sapiens	27123	H. sapiens	DKK2	dickkopf WNT signaling pathway inhibitor 2	GO:2000272 negative regulation of signaling receptor activity;GO:0090263 positive regulation of canonical Wnt signaling pathway;GO:0090090 negative regulation of canonical Wnt signaling pathway		Predicted intracellular proteins; Predicted secreted proteins	Golgi apparatus (Supported)		(M17761)ST WNT BETA CATENIN PATHWAY; (M70)PID PS1 PATHWAY		0	0	0	0	0	0	0	0	0	0	0	0	0	0	0	0	0	0	0	0
DNAH5	1767	symbol	H. sapiens	1767	H. sapiens	DNAH5	dynein axonemal heavy chain 5	GO:0021670 lateral ventricle development;GO:0036158 outer dynein arm assembly;GO:0021591 ventricular system development		Predicted intracellular proteins; Disease related genes					0	0	1	0	0	0	0	0	0	0	0	0	0	0	0	0	0	0	0	0
DNM3	26052	symbol	H. sapiens	26052	H. sapiens	DNM3	dynamin 3	GO:0061002 negative regulation of dendritic spine morphogenesis;GO:1903423 positive regulation of synaptic vesicle recycling;GO:0061000 negative regulation of dendritic spine development		Predicted intracellular proteins; ENZYME proteins:Hydrolases; Enzymes	Golgi apparatus (Approved)				0	0	1	1	1	0	1	0	0	0	0	1	1	0	0	1	0	1	0	0
DOK6	220164	symbol	H. sapiens	220164	H. sapiens	DOK6	docking protein 6	GO:0043410 positive regulation of MAPK cascade;GO:0007169 transmembrane receptor protein tyrosine kinase signaling pathway;GO:0043408 regulation of MAPK cascade		Predicted intracellular proteins	Cytosol;Focal adhesion sites (Approved)		(M82)PID RET PATHWAY		1	0	0	0	1	0	0	0	0	0	0	0	0	0	0	0	0	0	0	0
DPP4	1803	symbol	H. sapiens	1803	H. sapiens	DPP4	dipeptidyl peptidase 4	GO:0036343 psychomotor behavior;GO:0071623 negative regulation of granulocyte chemotaxis;GO:0090024 negative regulation of neutrophil chemotaxis		CD markers; Predicted intracellular proteins; Predicted secreted proteins; Peptidases:Serine-type peptidases; FDA approved drug targets:Small molecule drugs; ENZYME proteins:Hydrolases; Enzymes		Atorvastatin; Sitagliptin; 2-Amino-3-Methyl-1-Pyrrolidin-1-Yl-Butan-1-One; 5-(Aminomethyl)-6-(2,4-Dichlorophenyl)-2-(3,5-Dimethoxyphenyl)Pyrimidin-4-Amine; (2s)-Pyrrolidin-2-Ylmethylamine; 4-Iodo-L-phenylalanine; Diisopropylphosphono Group; 1-(1-phenylcyclopentyl)methylamine; (S)-2-[(R)-3-amino-4-(2-fluorophenyl)butyryl]-1,2,3,4-tetrahydroisoquinoline-3-carboxamide; Vildagliptin; PSN9301; AMG-222…		(M5957)HALLMARK PANCREAS BETA CELLS; (M5946)HALLMARK COAGULATION; (M5921)HALLMARK COMPLEMENT	0	1	0	0	0	0	1	0	0	0	0	0	1	0	1	0	0	1	0	0
DPT	1805	symbol	H. sapiens	1805	H. sapiens	DPT	dermatopontin	GO:0030199 collagen fibril organization;GO:0030198 extracellular matrix organization;GO:0043062 extracellular structure organization		Predicted secreted proteins	Vesicles (Approved)		(M3008)NABA ECM GLYCOPROTEINS; (M5884)NABA CORE MATRISOME; (M5889)NABA MATRISOME		0	1	0	0	0	0	0	0	0	0	0	0	1	0	0	0	0	0	0	0
DRAM2	128338	symbol	H. sapiens	128338	H. sapiens	DRAM2	DNA damage regulated autophagy modulator 2	GO:0045494 photoreceptor cell maintenance;GO:0001895 retina homeostasis;GO:0007601 visual perception			Golgi apparatus;Vesicles (Enhanced)			(M5905)HALLMARK ADIPOGENESIS	0	0	0	0	0	0	0	0	0	0	0	0	0	0	0	0	0	0	0	0
DSTYK	25778	symbol	H. sapiens	25778	H. sapiens	DSTYK	dual serine/threonine and tyrosine protein kinase	GO:0045743 positive regulation of fibroblast growth factor receptor signaling pathway;GO:0040036 regulation of fibroblast growth factor receptor signaling pathway;GO:0008543 fibroblast growth factor receptor signaling pathway	Other	ENZYME proteins:Transferases; Kinases; Predicted intracellular proteins; Enzymes; Disease related genes; Potential drug targets	Intermediate filaments;Nuclear speckles (Uncertain); Additional: Cytosol				1	0	0	0	0	0	0	0	0	0	0	0	0	0	0	0	0	0	0	0
DYNC1I1	1780	symbol	H. sapiens	1780	H. sapiens	DYNC1I1	dynein cytoplasmic 1 intermediate chain 1	GO:0047496 vesicle transport along microtubule;GO:0099518 vesicle cytoskeletal trafficking;GO:0072384 organelle transport along microtubule		Predicted intracellular proteins					0	0	0	0	1	0	0	0	0	0	0	0	0	0	0	0	0	0	0	0
EFCAB14	9813	symbol	H. sapiens	9813	H. sapiens	EFCAB14	EF-hand calcium binding domain 14				Cytosol (Approved); Additional: Golgi apparatus;Nucleoli				0	0	0	0	0	0	0	0	0	0	0	0	0	0	0	0	0	0	0	0
EGFL6	25975	symbol	H. sapiens	25975	H. sapiens	EGFL6	EGF like domain multiple 6	GO:0010811 positive regulation of cell-substrate adhesion;GO:0010810 regulation of cell-substrate adhesion;GO:0030198 extracellular matrix organization		Predicted secreted proteins			(M5883)NABA SECRETED FACTORS; (M5885)NABA MATRISOME ASSOCIATED; (M5889)NABA MATRISOME		0	1	0	0	0	0	1	0	0	0	0	0	0	0	0	0	0	0	0	0
EHHADH	1962	symbol	H. sapiens	1962	H. sapiens	EHHADH	enoyl-CoA hydratase and 3-hydroxyacyl CoA dehydrogenase	GO:0033540 fatty acid beta-oxidation using acyl-CoA oxidase;GO:0006635 fatty acid beta-oxidation;GO:0009062 fatty acid catabolic process		ENZYME proteins:Lyases; ENZYME proteins:Isomerase; Predicted intracellular proteins; Enzymes; ENZYME proteins:Oxidoreductases; Disease related genes; Potential drug targets		NADH		(M5949)HALLMARK PEROXISOME; (M5935)HALLMARK FATTY ACID METABOLISM	0	0	0	0	1	1	0	0	0	0	0	0	0	0	0	0	0	0	0	0
ELF1	1997	symbol	H. sapiens	1997	H. sapiens	ELF1	E74 like ETS transcription factor 1	GO:0045944 positive regulation of transcription by RNA polymerase II;GO:0045893 positive regulation of transcription, DNA-templated;GO:1903508 positive regulation of nucleic acid-templated transcription		Predicted intracellular proteins; Transcription factors:Helix-turn-helix domains	Nucleoplasm (Supported)		(M234)PID IL2 STAT5 PATHWAY; (M92)PID ANGIOPOIETIN RECEPTOR PATHWAY; (M279)PID RB 1PATHWAY	(M5911)HALLMARK INTERFERON ALPHA RESPONSE; (M5906)HALLMARK ESTROGEN RESPONSE EARLY	0	0	0	0	1	0	0	0	0	0	0	0	0	0	0	0	0	0	0	0
ELK3	2004	symbol	H. sapiens	2004	H. sapiens	ELK3	ETS transcription factor ELK3	GO:0042060 wound healing;GO:0009611 response to wounding;GO:0001525 angiogenesis		Cancer-related genes:Candidate cancer biomarkers; Predicted intracellular proteins; Transcription factors:Helix-turn-helix domains	Nucleoplasm (Supported); Additional: Mitochondria				0	0	0	0	0	0	0	0	0	1	0	0	0	0	0	0	0	0	0	0
EMP1	2012	symbol	H. sapiens	2012	H. sapiens	EMP1	epithelial membrane protein 1	GO:0032060 bleb assembly;GO:0008544 epidermis development;GO:0120031 plasma membrane bounded cell projection assembly		Predicted intracellular proteins	Nucleoplasm (Approved)			(M5902)HALLMARK APOPTOSIS; (M5947)HALLMARK IL2 STAT5 SIGNALING; (M5953)HALLMARK KRAS SIGNALING UP	0	0	1	0	0	0	0	0	0	0	0	0	0	0	0	0	0	0	0	0
EMX2	2018	symbol	H. sapiens	2018	H. sapiens	EMX2	empty spiracles homeobox 2	GO:0021796 cerebral cortex regionalization;GO:0072197 ureter morphogenesis;GO:0021978 telencephalon regionalization		Predicted intracellular proteins; Disease related genes; Transcription factors:Helix-turn-helix domains	Nucleoplasm (Approved)				0	0	0	0	0	0	0	0	0	0	0	0	0	0	0	0	0	0	0	0
EMX2OS	196047	symbol	H. sapiens	196047	H. sapiens	EMX2OS	EMX2 opposite strand/antisense RNA								0	0	0	0	0	0	0	0	0	0	0	0	0	0	0	0	0	0	0	0
ENPP2	5168	symbol	H. sapiens	5168	H. sapiens	ENPP2	ectonucleotide pyrophosphatase/phosphodiesterase 2	GO:2000394 positive regulation of lamellipodium morphogenesis;GO:2000392 regulation of lamellipodium morphogenesis;GO:0034638 phosphatidylcholine catabolic process		Cancer-related genes:Candidate cancer biomarkers; Predicted intracellular proteins; ENZYME proteins:Hydrolases; Enzymes	Golgi apparatus;Nucleoplasm (Approved); Additional: Actin filaments			(M5905)HALLMARK ADIPOGENESIS	0	0	0	1	0	1	0	0	0	0	0	0	0	0	1	1	0	0	0	0
ENPP4	22875	symbol	H. sapiens	22875	H. sapiens	ENPP4	ectonucleotide pyrophosphatase/phosphodiesterase 4	GO:0046130 purine ribonucleoside catabolic process;GO:0006152 purine nucleoside catabolic process;GO:0046128 purine ribonucleoside metabolic process		ENZYME proteins:Hydrolases; Enzymes					0	0	0	0	0	0	0	0	0	1	0	0	0	0	0	0	0	0	0	0
ENPP5	59084	symbol	H. sapiens	59084	H. sapiens	ENPP5	ectonucleotide pyrophosphatase/phosphodiesterase family member 5	GO:0007154 cell communication;GO:0009987 cellular process;GO:0008150 biological_process			Cytosol (Approved); Additional: Nucleoplasm				0	0	0	0	0	0	0	0	0	0	0	0	0	0	0	0	0	0	0	0
ERICH2	285141	symbol	H. sapiens	285141	H. sapiens	ERICH2	glutamate rich 2			Predicted intracellular proteins	Nucleoli fibrillar center (Approved); Additional: Vesicles				0	0	0	0	0	0	0	0	0	0	0	0	0	0	0	0	0	0	0	0
ESYT3	83850	symbol	H. sapiens	83850	H. sapiens	ESYT3	extended synaptotagmin 3	GO:0061817 endoplasmic reticulum-plasma membrane tethering;GO:0051643 endoplasmic reticulum localization;GO:0140056 organelle localization by membrane tethering		Transporters					0	0	0	0	0	1	0	0	0	0	0	0	0	0	0	0	1	0	0	0
ETFDH	2110	symbol	H. sapiens	2110	H. sapiens	ETFDH	electron transfer flavoprotein dehydrogenase	GO:0033539 fatty acid beta-oxidation using acyl-CoA dehydrogenase;GO:0006635 fatty acid beta-oxidation;GO:0009062 fatty acid catabolic process		Predicted intracellular proteins; Enzymes; ENZYME proteins:Oxidoreductases; Disease related genes; Potential drug targets		Metformin; 2-Hexyloxy-6-Hydroxymethyl-Tetrahydro-Pyran-3,4,5-Triol		(M5935)HALLMARK FATTY ACID METABOLISM; (M5934)HALLMARK XENOBIOTIC METABOLISM; (M5936)HALLMARK OXIDATIVE PHOSPHORYLATION	0	0	0	0	0	0	0	0	0	0	0	0	0	0	0	0	0	0	0	0
EXOC1	55763	symbol	H. sapiens	55763	H. sapiens	EXOC1	exocyst complex component 1	GO:0006893 Golgi to plasma membrane transport;GO:0006892 post-Golgi vesicle-mediated transport;GO:0050714 positive regulation of protein secretion		Transporters:Transporter channels and pores; Predicted intracellular proteins	Plasma membrane (Approved); Additional: Cytosol;Microtubules		(M16)PID INSULIN PATHWAY; (M67)PID ARF6 TRAFFICKING PATHWAY		0	0	0	0	0	0	0	0	1	0	0	0	0	0	0	0	0	1	0	0
EXPH5	23086	symbol	H. sapiens	23086	H. sapiens	EXPH5	exophilin 5	GO:0003334 keratinocyte development;GO:0071985 multivesicular body sorting pathway;GO:0045921 positive regulation of exocytosis		Predicted intracellular proteins; Disease related genes					0	0	0	0	0	0	0	0	0	0	0	0	0	0	0	1	0	1	0	0
F8	2157	symbol	H. sapiens	2157	H. sapiens	F8	coagulation factor VIII	GO:0007597 blood coagulation, intrinsic pathway;GO:0072378 blood coagulation, fibrin clot formation;GO:0072376 protein activation cascade		Candidate cardiovascular disease genes; FDA approved drug targets:Biotech drugs; Predicted intracellular proteins; Predicted secreted proteins; Disease related genes		Drotrecogin alfa; Coagulation Factor IX (Recombinant); TB-402; Thrombin; Protein C; Human thrombin; Thrombin alfa; Vonicog Alfa; Von Willebrand Factor Human; Anti-inhibitor coagulant complex; Coagulation Factor IX Human; Nonacog beta pegol; Damoctocog alfa pegol		(M5946)HALLMARK COAGULATION; (M5921)HALLMARK COMPLEMENT	0	0	0	0	0	0	0	0	0	1	0	0	0	0	0	0	0	0	0	0
FAM107A	11170	symbol	H. sapiens	11170	H. sapiens	FAM107A	family with sequence similarity 107 member A	GO:1900272 negative regulation of long-term synaptic potentiation;GO:0051895 negative regulation of focal adhesion assembly;GO:0150118 negative regulation of cell-substrate junction organization		Predicted intracellular proteins	Nuclear speckles (Supported)				0	0	0	0	0	0	1	0	0	0	0	0	1	1	1	0	0	0	0	0
FAM126A	84668	symbol	H. sapiens	84668	H. sapiens	FAM126A	family with sequence similarity 126 member A	GO:0046854 phosphatidylinositol phosphate biosynthetic process;GO:0006661 phosphatidylinositol biosynthetic process;GO:0042552 myelination		Predicted intracellular proteins; Disease related genes	Cytosol;Plasma membrane (Supported)				0	0	0	0	0	1	0	0	1	0	0	0	0	0	0	0	0	0	0	0
FAM134B	54463	gene_synonym	H. sapiens	54463	H. sapiens	RETREG1	reticulophagy regulator 1	GO:0050872 white fat cell differentiation;GO:0061709 reticulophagy;GO:0000423 mitophagy		Disease related genes	Endoplasmic reticulum (Supported)			(M5906)HALLMARK ESTROGEN RESPONSE EARLY	0	1	0	0	0	0	0	0	0	0	0	0	0	0	0	0	0	0	0	0
FAM13A-AS1	285512	symbol	H. sapiens	285512	H. sapiens	FAM13A-AS1	FAM13A antisense RNA 1								0	0	0	0	0	0	0	0	0	0	0	0	0	0	0	0	0	0	0	0
FAM13B	51306	symbol	H. sapiens	51306	H. sapiens	FAM13B	family with sequence similarity 13 member B	GO:0051056 regulation of small GTPase mediated signal transduction;GO:0007264 small GTPase mediated signal transduction;GO:1902531 regulation of intracellular signal transduction		Predicted intracellular proteins	Nucleoplasm (Approved)				0	0	0	0	0	0	0	0	0	0	0	0	0	0	0	0	0	0	0	0
FAM188A	80013	gene_synonym	H. sapiens	80013	H. sapiens	MINDY3	MINDY lysine 48 deubiquitinase 3	GO:0071108 protein K48-linked deubiquitination;GO:0016579 protein deubiquitination;GO:0070646 protein modification by small protein removal		Predicted intracellular proteins; Peptidases; ENZYME proteins:Hydrolases; Enzymes	Nuclear membrane;Nucleoplasm (Supported)				0	0	0	0	0	0	0	0	0	0	0	0	0	0	0	0	0	0	0	0
FAM19A2	338811	gene_synonym	H. sapiens	338811	H. sapiens	TAFA2	TAFA chemokine like family member 2	GO:0008542 visual learning;GO:0007632 visual behavior;GO:0008306 associative learning		Predicted intracellular proteins					0	0	0	0	0	0	0	0	0	0	0	0	0	0	0	0	0	0	0	0
FAM204A	63877	symbol	H. sapiens	63877	H. sapiens	FAM204A	family with sequence similarity 204 member A			Predicted intracellular proteins	Nucleoli;Nucleoplasm (Approved)				0	0	0	0	0	0	0	0	0	0	0	0	0	0	0	0	0	0	0	0
FAM49A	81553	gene_synonym	H. sapiens	81553	H. sapiens	CYRIA	CYFIP related Rac1 interactor A	GO:0030833 regulation of actin filament polymerization;GO:0008064 regulation of actin polymerization or depolymerization;GO:0030832 regulation of actin filament length		Predicted intracellular proteins	Nucleoplasm (Approved)				0	0	0	0	0	0	0	0	0	0	0	0	1	0	0	0	0	0	0	0
FAR1	84188	symbol	H. sapiens	84188	H. sapiens	FAR1	fatty acyl-CoA reductase 1	GO:0010025 wax biosynthetic process;GO:0010166 wax metabolic process;GO:0008611 ether lipid biosynthetic process		Predicted intracellular proteins; Enzymes; ENZYME proteins:Oxidoreductases; Disease related genes; Potential drug targets	Peroxisomes (Supported)				0	0	0	0	0	1	0	0	0	0	0	0	0	0	0	0	0	0	0	0
FAS	355	symbol	H. sapiens	355	H. sapiens	FAS	Fas cell surface death receptor	GO:0036337 Fas signaling pathway;GO:0071455 cellular response to hyperoxia;GO:0097527 necroptotic signaling pathway		Cancer-related genes:Candidate cancer biomarkers; CD markers; Candidate cardiovascular disease genes; Predicted secreted proteins; Disease related genes	Plasma membrane (Supported); Additional: Cytosol;Nuclear bodies		(M5060)SA FAS SIGNALING; (M7997)SA CASPASE CASCADE; (M197)PID HIV NEF PATHWAY	(M5897)HALLMARK IL6 JAK STAT3 SIGNALING; (M5902)HALLMARK APOPTOSIS; (M5913)HALLMARK INTERFERON GAMMA RESPONSE	1	0	0	0	1	0	0	0	0	0	0	0	0	0	0	0	0	0	0	0
FASTKD3	79072	symbol	H. sapiens	79072	H. sapiens	FASTKD3	FAST kinase domains 3	GO:0044528 regulation of mitochondrial mRNA stability;GO:0070131 positive regulation of mitochondrial translation;GO:0033617 mitochondrial cytochrome c oxidase assembly		Predicted intracellular proteins	Mitochondria;Nucleoplasm (Supported)				0	0	0	0	0	0	0	0	0	0	0	0	0	0	0	0	0	0	0	0
FBLN5	10516	symbol	H. sapiens	10516	H. sapiens	FBLN5	fibulin 5	GO:0048251 elastic fiber assembly;GO:2000121 regulation of removal of superoxide radicals;GO:0019430 removal of superoxide radicals		Predicted secreted proteins; Disease related genes	Plasma membrane (Supported)		(M3008)NABA ECM GLYCOPROTEINS; (M5884)NABA CORE MATRISOME; (M5889)NABA MATRISOME	(M5942)HALLMARK UV RESPONSE DN; (M5930)HALLMARK EPITHELIAL MESENCHYMAL TRANSITION	0	1	0	0	0	0	1	0	0	0	0	0	1	0	0	0	0	0	0	0
FBXO36	130888	symbol	H. sapiens	130888	H. sapiens	FBXO36	F-box protein 36			Predicted intracellular proteins	Nucleoli;Nucleoplasm (Approved)				0	0	0	0	0	0	0	0	0	0	0	0	0	0	0	0	0	0	0	0
FBXW2	26190	symbol	H. sapiens	26190	H. sapiens	FBXW2	F-box and WD repeat domain containing 2	GO:0016567 protein ubiquitination;GO:0032446 protein modification by small protein conjugation;GO:0070647 protein modification by small protein conjugation or removal		Predicted intracellular proteins	Nucleoplasm (Approved)		(M5493)WNT SIGNALING		0	0	0	0	0	0	0	0	0	0	0	0	0	0	0	0	0	0	0	0
FBXW7	55294	symbol	H. sapiens	55294	H. sapiens	FBXW7	F-box and WD repeat domain containing 7	GO:1903378 positive regulation of oxidative stress-induced neuron intrinsic apoptotic signaling pathway;GO:2000639 negative regulation of SREBP signaling pathway;GO:2000346 negative regulation of hepatocyte proliferation		Cancer-related genes:Mutated cancer genes; Cancer-related genes:Mutational cancer driver genes; Predicted intracellular proteins	Nucleoplasm;Vesicles (Supported)		(M139)PID MYC PATHWAY; (M9526)ST T CELL SIGNAL TRANSDUCTION; (M236)PID DELTA NP63 PATHWAY	(M5939)HALLMARK P53 PATHWAY	1	1	0	0	0	1	0	0	0	0	0	0	0	0	0	0	1	0	0	0
FCHO2	115548	symbol	H. sapiens	115548	H. sapiens	FCHO2	FCH and mu domain containing endocytic adaptor 2	GO:0048268 clathrin coat assembly;GO:0072583 clathrin-dependent endocytosis;GO:0048488 synaptic vesicle endocytosis		Predicted intracellular proteins	Centrosome (Approved); Additional: Cytosol;Vesicles				0	0	0	0	0	0	0	0	1	0	0	0	0	0	0	1	0	1	0	0
FEZ1	9638	symbol	H. sapiens	9638	H. sapiens	FEZ1	fasciculation and elongation protein zeta 1	GO:0061880 regulation of anterograde axonal transport of mitochondrion;GO:0061881 positive regulation of anterograde axonal transport of mitochondrion;GO:0098957 anterograde axonal transport of mitochondrion		Predicted intracellular proteins	Cytosol;Microtubules (Approved)			(M5902)HALLMARK APOPTOSIS	0	0	0	1	0	0	0	0	0	0	0	0	1	0	1	0	0	0	0	0
FGF9	2254	symbol	H. sapiens	2254	H. sapiens	FGF9	fibroblast growth factor 9	GO:1900240 negative regulation of phenotypic switching;GO:1905916 negative regulation of cell differentiation involved in phenotypic switching;GO:1905931 negative regulation of vascular associated smooth muscle cell differentiation involved in phenotypic switching		Cancer-related genes:Candidate cancer biomarkers; RAS pathway related proteins; Predicted intracellular proteins; Predicted secreted proteins; Disease related genes			(M276)PID FGF PATHWAY; (M5883)NABA SECRETED FACTORS; (M5885)NABA MATRISOME ASSOCIATED	(M5953)HALLMARK KRAS SIGNALING UP	1	0	0	0	1	0	0	0	0	0	0	1	0	0	1	0	0	0	0	0
FKBP1A	2280	symbol	H. sapiens	2280	H. sapiens	FKBP1A	FKBP prolyl isomerase 1A	GO:0022417 protein maturation by protein folding;GO:0060315 negative regulation of ryanodine-sensitive calcium-release channel activity;GO:0007183 SMAD protein complex assembly		ENZYME proteins:Isomerase; Transporters:Accessory Factors Involved in Transport; Predicted intracellular proteins; FDA approved drug targets:Small molecule drugs; Enzymes		Pimecrolimus; Tacrolimus; Sirolimus; (3R)-4-(p-toluenesulfonyl)-1,4-thiazane-3-carboxylicacid-L-phenylalanine ethyl ester; {3-[3-(3,4-Dimethoxy-Phenyl)-1-(1-{1-[2-(3,4,5-Trimethoxy-Phenyl)-Butyryl]-Piperidin-2yl}-Vinyloxy)-Propyl]-Phenoxy}-Acetic Acid; Gpi-1046; Methyl Methylsulfinylmethyl Sulfide; FKB-001; Heptyl glucoside; L-709,587; (3r)-4-(P-Toluenesulfonyl)-1,4-Thiazane-3-Carboxylicacid-L-Le…	(M203)PID ALK2 PATHWAY; (M185)PID ALK1 PATHWAY; (M235)PID TCR CALCIUM PATHWAY	(M5896)HALLMARK TGF BETA SIGNALING	0	0	0	0	0	0	0	0	0	0	0	0	1	0	0	0	0	1	1	0
FMOD	2331	symbol	H. sapiens	2331	H. sapiens	FMOD	fibromodulin	GO:0007181 transforming growth factor beta receptor complex assembly;GO:0030199 collagen fibril organization;GO:0007179 transforming growth factor beta receptor signaling pathway		Predicted secreted proteins			(M5882)NABA PROTEOGLYCANS; (M5884)NABA CORE MATRISOME; (M5889)NABA MATRISOME	(M5930)HALLMARK EPITHELIAL MESENCHYMAL TRANSITION	0	1	0	0	0	0	0	0	0	0	0	0	1	0	0	0	0	0	0	0
FMR1	2332	symbol	H. sapiens	2332	H. sapiens	FMR1	FMRP translational regulator 1	GO:1901254 positive regulation of intracellular transport of viral material;GO:1900453 negative regulation of long-term synaptic depression;GO:1901252 regulation of intracellular transport of viral material		Predicted intracellular proteins; Disease related genes	Cytosol (Enhanced)				0	0	1	1	0	0	0	0	0	0	0	0	1	1	0	1	0	1	0	0
FOXL2NB	401089	symbol	H. sapiens	401089	H. sapiens	FOXL2NB	FOXL2 neighbor			Predicted intracellular proteins	Nucleoli fibrillar center (Enhanced)				0	0	0	0	0	0	0	0	0	0	0	0	0	0	0	0	0	0	0	0
FOXO1	2308	symbol	H. sapiens	2308	H. sapiens	FOXO1	forkhead box O1	GO:1902617 response to fluoride;GO:0071455 cellular response to hyperoxia;GO:0010616 negative regulation of cardiac muscle adaptation		Cancer-related genes:Candidate cancer biomarkers; Predicted intracellular proteins; Disease related genes; Transcription factors:Helix-turn-helix domains	Cytosol;Nucleoplasm (Supported)		(M32)PID HDAC CLASSIII PATHWAY; (M249)PID PI3KCI AKT PATHWAY; (M14532)ST PHOSPHOINOSITIDE 3 KINASE PATHWAY	(M5957)HALLMARK PANCREAS BETA CELLS	1	0	0	0	1	0	0	1	0	0	0	0	0	1	0	0	0	0	0	0
FOXP2	93986	symbol	H. sapiens	93986	H. sapiens	FOXP2	forkhead box P2	GO:0021757 caudate nucleus development;GO:0021758 putamen development;GO:0098582 innate vocalization behavior		Predicted intracellular proteins; Disease related genes; Transcription factors:Helix-turn-helix domains	Nucleoplasm (Enhanced)				0	0	0	0	0	0	0	0	0	0	0	0	0	1	0	0	0	0	0	0
FTO	79068	symbol	H. sapiens	79068	H. sapiens	FTO	FTO alpha-ketoglutarate dependent dioxygenase	GO:0042245 RNA repair;GO:0070343 white fat cell proliferation;GO:0070350 regulation of white fat cell proliferation		Predicted intracellular proteins; Disease related genes	Cytosol (Supported); Additional: Vesicles	Artenimol			0	0	0	0	0	0	0	0	0	0	0	0	0	0	0	0	1	0	0	0
FUCA2	2519	symbol	H. sapiens	2519	H. sapiens	FUCA2	alpha-L-fucosidase 2	GO:2000535 regulation of entry of bacterium into host cell;GO:0035635 entry of bacterium into host cell;GO:0016139 glycoside catabolic process		Predicted intracellular proteins; Predicted secreted proteins; ENZYME proteins:Hydrolases; Enzymes					0	0	0	0	0	0	0	0	0	0	0	0	0	0	0	0	0	0	0	0
FUT8	2530	symbol	H. sapiens	2530	H. sapiens	FUT8	fucosyltransferase 8	GO:0036071 N-glycan fucosylation;GO:0033578 protein glycosylation in Golgi;GO:0046368 GDP-L-fucose metabolic process		ENZYME proteins:Transferases; Predicted intracellular proteins; Enzymes	Golgi apparatus (Approved); Additional: Cytosol;Nucleoplasm			(M5937)HALLMARK GLYCOLYSIS	0	0	0	0	0	0	0	0	0	0	0	0	0	0	0	0	0	0	0	0
GGPS1	9453	symbol	H. sapiens	9453	H. sapiens	GGPS1	geranylgeranyl diphosphate synthase 1	GO:0033385 geranylgeranyl diphosphate metabolic process;GO:0033386 geranylgeranyl diphosphate biosynthetic process;GO:0033383 geranyl diphosphate metabolic process		ENZYME proteins:Transferases; Predicted intracellular proteins; FDA approved drug targets:Small molecule drugs; Enzymes		Pamidronic acid; Zoledronic acid; Ibandronate; Geranyl Diphosphate; Farnesyl thiopyrophosphate; ISOPENTENYL PYROPHOSPHATE; Minodronic acid; (1-HYDROXYHEPTANE-1,1-DIYL)BIS(PHOSPHONIC ACID); (1-HYDROXYNONANE-1,1-DIYL)BIS(PHOSPHONIC ACID); (2,2-DIPHOSPHONOETHYL)(DODECYL)DIMETHYLPHOSPHONIUM; [2-(3-DIBENZOFURAN-4-YL-PHENYL)-1-HYDROXY-1-PHOSPHONO-ETHYL]-PHOSPHONIC ACID; Farnesyl diphosphate; Geranylger…			0	0	0	0	0	1	0	0	0	0	0	0	0	0	0	0	0	0	0	0
GLIPR1	11010	symbol	H. sapiens	11010	H. sapiens	GLIPR1	GLI pathogenesis related 1			Predicted intracellular proteins		SOT-107		(M5930)HALLMARK EPITHELIAL MESENCHYMAL TRANSITION	0	0	0	0	0	1	0	0	0	0	0	0	0	0	0	0	0	0	0	0
GLTSCR1L	23506	gene_synonym	H. sapiens	23506	H. sapiens	BICRAL	BICRA like chromatin remodeling complex associated protein	GO:0045893 positive regulation of transcription, DNA-templated;GO:1903508 positive regulation of nucleic acid-templated transcription;GO:1902680 positive regulation of RNA biosynthetic process		Predicted intracellular proteins	Nucleoplasm (Supported)				0	0	0	0	0	0	0	0	0	0	0	0	0	0	0	0	0	0	0	0
GNB5	10681	symbol	H. sapiens	10681	H. sapiens	GNB5	G protein subunit beta 5	GO:0036367 light adaption;GO:0009646 response to absence of light;GO:0071485 cellular response to absence of light		Predicted intracellular proteins; Disease related genes; RAS pathway related proteins	Nuclear speckles (Approved); Additional: Centrosome;Rods & Rings		(M117)PID CONE PATHWAY; (M204)PID RHODOPSIN PATHWAY; (M99)PID TXA2PATHWAY		1	0	0	0	1	0	0	0	0	1	0	0	0	1	0	0	0	1	0	1
GNG2	54331	symbol	H. sapiens	54331	H. sapiens	GNG2	G protein subunit gamma 2	GO:0007191 adenylate cyclase-activating dopamine receptor signaling pathway;GO:0071380 cellular response to prostaglandin E stimulus;GO:0071379 cellular response to prostaglandin stimulus		Predicted intracellular proteins; RAS pathway related proteins	Plasma membrane (Approved); Additional: Vesicles	Halothane	(M138)PID THROMBIN PAR4 PATHWAY; (M252)PID IL8 CXCR1 PATHWAY; (M213)PID AR NONGENOMIC PATHWAY	(M5921)HALLMARK COMPLEMENT	1	0	0	0	1	0	0	0	0	1	0	0	0	1	0	0	0	0	0	1
GNRH1	2796	symbol	H. sapiens	2796	H. sapiens	GNRH1	gonadotropin releasing hormone 1	GO:1990637 response to prolactin;GO:0033087 negative regulation of immature T cell proliferation;GO:2000354 regulation of ovarian follicle development		Predicted secreted proteins; Disease related genes			(M213)PID AR NONGENOMIC PATHWAY		0	0	0	0	1	0	1	0	0	0	0	0	0	1	0	0	0	0	0	0
GPRC5B	51704	symbol	H. sapiens	51704	H. sapiens	GPRC5B	G protein-coupled receptor class C group 5 member B	GO:0060907 positive regulation of macrophage cytokine production;GO:0010934 macrophage cytokine production;GO:0010935 regulation of macrophage cytokine production		Predicted intracellular proteins; G-protein coupled receptors:Family 3 (C) receptors; G-protein coupled receptors:GPCRs excl olfactory receptors	Vesicles (Supported); Additional: Nucleoli;Nucleoplasm			(M5953)HALLMARK KRAS SIGNALING UP	0	0	0	0	0	0	0	0	0	0	0	0	0	0	1	0	0	0	0	0
GREM2	64388	symbol	H. sapiens	64388	H. sapiens	GREM2	gremlin 2, DAN family BMP antagonist	GO:0038098 sequestering of BMP from receptor via BMP binding;GO:0060300 regulation of cytokine activity;GO:0010172 embryonic body morphogenesis		Predicted secreted proteins; Disease related genes					0	0	0	0	0	0	0	0	0	0	0	0	0	0	0	0	0	0	0	0
GRIA3	2892	symbol	H. sapiens	2892	H. sapiens	GRIA3	glutamate ionotropic receptor AMPA type subunit 3	GO:0035235 ionotropic glutamate receptor signaling pathway;GO:0007215 glutamate receptor signaling pathway;GO:0034220 ion transmembrane transport		Transporters:Transporter channels and pores; Predicted intracellular proteins; Potential drug targets; Disease related genes		Glutamic acid; Butabarbital; Ethanol; Lithium cation; Aniracetam; Talampanel; CX717; Fluciclovine (18F); Lithium citrate; Lithium succinate; Lithium carbonate			0	0	0	0	1	0	0	0	0	0	0	0	0	0	0	0	0	0	0	0
GSAP	54103	symbol	H. sapiens	54103	H. sapiens	GSAP	gamma-secretase activating protein	GO:1902004 positive regulation of amyloid-beta formation;GO:1902993 positive regulation of amyloid precursor protein catabolic process;GO:1902003 regulation of amyloid-beta formation		Predicted intracellular proteins	Vesicles (Approved)				0	0	0	0	0	0	0	0	0	0	0	0	0	0	0	0	0	0	0	0
GYPE	2996	symbol	H. sapiens	2996	H. sapiens	GYPE	glycophorin E (MNS blood group)							(M5945)HALLMARK HEME METABOLISM	0	0	0	0	0	0	0	0	0	0	0	0	0	0	0	0	0	0	0	0
HADHA	3030	symbol	H. sapiens	3030	H. sapiens	HADHA	hydroxyacyl-CoA dehydrogenase trifunctional multienzyme complex subunit alpha	GO:0035965 cardiolipin acyl-chain remodeling;GO:0032048 cardiolipin metabolic process;GO:0046471 phosphatidylglycerol metabolic process		ENZYME proteins:Lyases; Predicted intracellular proteins; Enzymes; ENZYME proteins:Oxidoreductases; Disease related genes; Potential drug targets	Mitochondria (Enhanced)	NADH		(M5936)HALLMARK OXIDATIVE PHOSPHORYLATION	0	0	0	0	0	1	0	0	0	0	0	0	0	1	0	0	0	0	0	0
HCG11	493812	symbol	H. sapiens	493812	H. sapiens	HCG11	HLA complex group 11								0	0	0	0	0	0	0	0	0	0	0	0	0	0	0	0	0	0	0	0
HERC3	8916	symbol	H. sapiens	8916	H. sapiens	HERC3	HECT and RLD domain containing E3 ubiquitin protein ligase 3	GO:0016567 protein ubiquitination;GO:0032446 protein modification by small protein conjugation;GO:0070647 protein modification by small protein conjugation or removal		ENZYME proteins:Transferases; Predicted intracellular proteins; Enzymes	Cytosol (Approved)			(M5908)HALLMARK ANDROGEN RESPONSE	0	0	0	0	0	0	0	0	0	0	0	0	0	0	0	0	0	0	0	0
HOXB-AS3	404266	symbol	H. sapiens	404266	H. sapiens	HOXB-AS3	HOXB cluster antisense RNA 3								0	0	0	0	0	0	0	0	0	0	0	0	0	0	0	0	0	0	0	0
HOXC8	3224	symbol	H. sapiens	3224	H. sapiens	HOXC8	homeobox C8	GO:0006357 regulation of transcription by RNA polymerase II;GO:0006366 transcription by RNA polymerase II;GO:0006355 regulation of transcription, DNA-templated		Predicted intracellular proteins; Transcription factors:Helix-turn-helix domains	Nucleoplasm (Supported); Additional: Microtubules				0	0	0	0	0	0	0	0	0	0	0	0	0	0	0	0	0	0	0	0
HSD17B11	51170	symbol	H. sapiens	51170	H. sapiens	HSD17B11	hydroxysteroid 17-beta dehydrogenase 11	GO:0006710 androgen catabolic process;GO:0042447 hormone catabolic process;GO:0006703 estrogen biosynthetic process		Predicted intracellular proteins; Enzymes; ENZYME proteins:Oxidoreductases	Lipid droplets (Supported)	Aetiocholanolone		(M5949)HALLMARK PEROXISOME; (M5948)HALLMARK BILE ACID METABOLISM; (M5935)HALLMARK FATTY ACID METABOLISM	0	0	0	0	0	1	0	0	0	0	0	0	0	0	0	0	0	0	0	0
HSPB7	27129	symbol	H. sapiens	27129	H. sapiens	HSPB7	heat shock protein family B (small) member 7	GO:0006986 response to unfolded protein;GO:0035966 response to topologically incorrect protein;GO:0008016 regulation of heart contraction		Predicted intracellular proteins	Nucleoplasm (Approved)				0	0	0	0	0	0	0	0	0	0	0	0	0	0	0	0	0	0	0	0
HTRA1	5654	symbol	H. sapiens	5654	H. sapiens	HTRA1	HtrA serine peptidase 1	GO:0060718 chorionic trophoblast cell differentiation;GO:0097187 dentinogenesis;GO:0060717 chorion development		Predicted intracellular proteins; Predicted secreted proteins; Peptidases:Serine-type peptidases; Enzymes; Disease related genes; Potential drug targets	Plasma membrane (Supported)		(M3468)NABA ECM REGULATORS; (M5885)NABA MATRISOME ASSOCIATED; (M5889)NABA MATRISOME	(M5946)HALLMARK COAGULATION; (M5930)HALLMARK EPITHELIAL MESENCHYMAL TRANSITION	1	1	0	0	0	0	0	0	0	0	0	0	0	0	0	0	0	0	0	0
HUNK	30811	symbol	H. sapiens	30811	H. sapiens	HUNK	hormonally up-regulated Neu-associated kinase	GO:0006468 protein phosphorylation;GO:0016310 phosphorylation;GO:0035556 intracellular signal transduction	CAMK Ser/Thr protein kinase family	ENZYME proteins:Transferases; Kinases:CAMK Ser/Thr protein kinases; Enzymes; Predicted intracellular proteins	Nucleoplasm;Plasma membrane (Approved)				0	0	0	0	0	0	0	0	0	0	0	0	0	0	0	0	0	0	0	0
IL13RA2	3598	symbol	H. sapiens	3598	H. sapiens	IL13RA2	interleukin 13 receptor subunit alpha 2	GO:0043305 negative regulation of mast cell degranulation;GO:0033007 negative regulation of mast cell activation involved in immune response;GO:0002887 negative regulation of myeloid leukocyte mediated immunity		Cancer-related genes:Candidate cancer biomarkers; CD markers	Cell Junctions;Plasma membrane (Approved); Additional: Nucleoplasm;Vesicles	AER001	(M17580)ST IL 13 PATHWAY; (M28)PID IL4 2PATHWAY	(M5951)HALLMARK SPERMATOGENESIS	0	0	0	0	0	0	0	1	0	0	0	0	0	0	0	1	0	1	0	0
IL16	3603	symbol	H. sapiens	3603	H. sapiens	IL16	interleukin 16	GO:0032730 positive regulation of interleukin-1 alpha production;GO:0032610 interleukin-1 alpha production;GO:0032650 regulation of interleukin-1 alpha production		Cancer-related genes:Candidate cancer biomarkers; Predicted intracellular proteins; Predicted secreted proteins	Nuclear speckles (Supported); Additional: Cytosol;Plasma membrane		(M5883)NABA SECRETED FACTORS; (M5885)NABA MATRISOME ASSOCIATED; (M5889)NABA MATRISOME	(M5950)HALLMARK ALLOGRAFT REJECTION	0	0	0	0	0	0	0	1	0	0	0	0	0	0	1	0	0	0	0	0
IL17RB	55540	symbol	H. sapiens	55540	H. sapiens	IL17RB	interleukin 17 receptor B	GO:0001558 regulation of cell growth;GO:0019221 cytokine-mediated signaling pathway;GO:0016049 cell growth			Nucleoplasm;Plasma membrane (Approved); Additional: Centriolar satellite;Mitotic spindle			(M5897)HALLMARK IL6 JAK STAT3 SIGNALING; (M5906)HALLMARK ESTROGEN RESPONSE EARLY; (M5907)HALLMARK ESTROGEN RESPONSE LATE	0	0	0	0	1	0	0	1	0	0	0	0	0	0	0	0	0	0	0	0
IL1RAP	3556	symbol	H. sapiens	3556	H. sapiens	IL1RAP	interleukin 1 receptor accessory protein	GO:0038172 interleukin-33-mediated signaling pathway;GO:0099545 trans-synaptic signaling by trans-synaptic complex;GO:0032754 positive regulation of interleukin-5 production		Predicted intracellular proteins; Predicted secreted proteins	Cytosol;Vesicles (Approved)		(M110)PID IL1 PATHWAY; (M19)PID P73PATHWAY		0	0	0	0	1	0	1	1	0	0	0	0	1	0	0	0	0	0	0	0
IL20RB	53833	symbol	H. sapiens	53833	H. sapiens	IL20RB	interleukin 20 receptor subunit beta	GO:0001808 negative regulation of type IV hypersensitivity;GO:0002884 negative regulation of hypersensitivity;GO:0001807 regulation of type IV hypersensitivity			Vesicles (Approved); Additional: Cytosol				0	0	0	0	1	0	1	1	0	0	0	0	0	0	0	0	0	0	0	0
IL21-AS1	100996941	symbol	H. sapiens	100996941	H. sapiens	IL21-AS1	IL21 antisense RNA 1								0	0	0	0	0	0	0	0	0	0	0	0	0	0	0	0	0	0	0	0
IL22RA1	58985	symbol	H. sapiens	58985	H. sapiens	IL22RA1	interleukin 22 receptor subunit alpha 1	GO:0050829 defense response to Gram-negative bacterium;GO:0042742 defense response to bacterium;GO:0019221 cytokine-mediated signaling pathway							0	0	0	0	1	0	0	1	0	0	0	0	0	0	0	0	0	0	0	0
INPP1	3628	symbol	H. sapiens	3628	H. sapiens	INPP1	inositol polyphosphate-1-phosphatase	GO:0046855 inositol phosphate dephosphorylation;GO:0046838 phosphorylated carbohydrate dephosphorylation;GO:0071545 inositol phosphate catabolic process		Predicted intracellular proteins; ENZYME proteins:Hydrolases; Enzymes	Centriolar satellite (Approved); Additional: Cytosol				0	0	0	0	0	1	0	0	0	0	0	0	0	0	0	0	0	0	0	0
IQCK	124152	symbol	H. sapiens	124152	H. sapiens	IQCK	IQ motif containing K			Predicted intracellular proteins	Nuclear speckles (Approved); Additional: Cytosol				0	0	0	0	0	0	0	0	0	0	0	0	0	0	0	0	0	0	0	0
IRAK3	11213	symbol	H. sapiens	11213	H. sapiens	IRAK3	interleukin 1 receptor associated kinase 3	GO:0010931 macrophage tolerance induction;GO:0010932 regulation of macrophage tolerance induction;GO:0010933 positive regulation of macrophage tolerance induction	TKL Ser/Thr protein kinase family	ENZYME proteins:Transferases; Predicted intracellular proteins; Enzymes; Disease related genes; Potential drug targets; Kinases:TKL Ser/Thr protein kinases	Vesicles (Approved)	Fostamatinib	(M110)PID IL1 PATHWAY		0	1	0	0	1	0	0	1	0	0	0	0	1	0	0	0	0	0	0	0
IRX5	10265	symbol	H. sapiens	10265	H. sapiens	IRX5	iroquois homeobox 5	GO:0048701 embryonic cranial skeleton morphogenesis;GO:1904888 cranial skeletal system development;GO:0048704 embryonic skeletal system morphogenesis		Predicted intracellular proteins; Disease related genes; Transcription factors:Helix-turn-helix domains	Nuclear speckles (Approved); Additional: Cytosol;Microtubules				0	0	0	0	0	0	0	0	0	0	0	0	0	0	0	0	0	0	0	0
ITGA4	3676	symbol	H. sapiens	3676	H. sapiens	ITGA4	integrin subunit alpha 4	GO:0043496 regulation of protein homodimerization activity;GO:0090074 negative regulation of protein homodimerization activity;GO:1990771 clathrin-dependent extracellular exosome endocytosis		Cancer-related genes:Candidate cancer biomarkers; Predicted intracellular proteins; CD markers; FDA approved drug targets:Biotech drugs	Plasma membrane (Approved)	Natalizumab; ATL1102; CDP323; R1295; R411; Tinzaparin; Vedolizumab	(M212)PID INTEGRIN5 PATHWAY; (M274)PID LYMPH ANGIOGENESIS PATHWAY; (M47)PID INTEGRIN CS PATHWAY	(M5897)HALLMARK IL6 JAK STAT3 SIGNALING	1	1	0	0	1	0	1	0	1	1	0	0	0	1	1	1	0	0	0	0
ITM2B	9445	symbol	H. sapiens	9445	H. sapiens	ITM2B	integral membrane protein 2B	GO:0042985 negative regulation of amyloid precursor protein biosynthetic process;GO:0010561 negative regulation of glycoprotein biosynthetic process;GO:0042983 amyloid precursor protein biosynthetic process		Disease related genes	Golgi apparatus;Vesicles (Enhanced)				0	0	0	0	0	0	0	0	0	0	0	0	0	0	0	0	0	0	0	0
KAT2B	8850	symbol	H. sapiens	8850	H. sapiens	KAT2B	lysine acetyltransferase 2B	GO:2000233 negative regulation of rRNA processing;GO:0018076 N-terminal peptidyl-lysine acetylation;GO:0090071 negative regulation of ribosome biogenesis		Cancer-related genes:Candidate cancer biomarkers; ENZYME proteins:Transferases; Predicted intracellular proteins; Enzymes; Disease related genes; Potential drug targets	Nucleoplasm (Enhanced); Additional: Cytosol	Coenzyme A; (3E)-4-(1-METHYL-1H-INDOL-3-YL)BUT-3-EN-2-ONE; N-(3-AMINOPROPYL)-2-NITROBENZENAMINE	(M32)PID HDAC CLASSIII PATHWAY; (M207)PID RETINOIC ACID PATHWAY; (M136)PID FOXO PATHWAY	(M5945)HALLMARK HEME METABOLISM	0	0	0	0	1	0	0	0	0	0	0	0	1	1	0	0	0	0	0	0
KCNA4	3739	symbol	H. sapiens	3739	H. sapiens	KCNA4	potassium voltage-gated channel subfamily A member 4	GO:0051260 protein homooligomerization;GO:0071805 potassium ion transmembrane transport;GO:0051259 protein complex oligomerization		FDA approved drug targets:Small molecule drugs; Voltage-gated ion channels:Voltage-Gated Potassium Channels		Arginineamide; Dalfampridine			0	0	0	0	0	0	0	0	0	0	0	0	0	0	0	0	0	0	0	0
KCNQ3	3786	symbol	H. sapiens	3786	H. sapiens	KCNQ3	potassium voltage-gated channel subfamily Q member 3	GO:0060081 membrane hyperpolarization;GO:0071805 potassium ion transmembrane transport;GO:0006813 potassium ion transport		Transporters:Transporter channels and pores; FDA approved drug targets:Small molecule drugs; Disease related genes; Voltage-gated ion channels:Voltage-Gated Potassium Channels		Amitriptyline; Meclofenamic acid; Gabapentin; Ezogabine; ICA-105665			0	0	0	0	1	0	0	0	0	0	0	0	0	0	0	0	0	0	0	0
KCNS3	3790	symbol	H. sapiens	3790	H. sapiens	KCNS3	potassium voltage-gated channel modifier subfamily S member 3	GO:0051260 protein homooligomerization;GO:0071805 potassium ion transmembrane transport;GO:0051259 protein complex oligomerization		Transporters:Transporter channels and pores; Predicted intracellular proteins; Voltage-gated ion channels:Voltage-Gated Potassium Channels	Cytosol (Supported); Additional: Golgi apparatus;Plasma membrane				0	0	0	0	0	0	0	0	0	0	0	0	0	0	0	0	0	0	0	0
KCTD2	23510	symbol	H. sapiens	23510	H. sapiens	KCTD2	potassium channel tetramerization domain containing 2	GO:0051260 protein homooligomerization;GO:0051259 protein complex oligomerization;GO:0043161 proteasome-mediated ubiquitin-dependent protein catabolic process		Predicted intracellular proteins					0	0	0	0	0	0	0	0	0	0	0	0	0	0	0	0	0	0	0	0
KIAA0430	9665	gene_synonym	H. sapiens	9665	H. sapiens	MARF1	meiosis regulator and mRNA stability factor 1	GO:0007143 female meiotic nuclear division;GO:0048477 oogenesis;GO:0007292 female gamete generation		Predicted intracellular proteins	Golgi apparatus;Vesicles (Approved)				0	0	0	0	0	0	0	0	0	0	0	0	0	0	0	0	0	0	0	0
KIAA1324L	222223	gene_synonym	H. sapiens	222223	H. sapiens	ELAPOR2	endosome-lysosome associated apoptosis and autophagy regulator family member 2	GO:0045684 positive regulation of epidermis development;GO:0030513 positive regulation of BMP signaling pathway;GO:0045682 regulation of epidermis development		Predicted intracellular proteins	Endoplasmic reticulum (Approved)				0	0	0	0	0	0	0	0	0	0	0	0	0	0	0	0	0	0	0	0
KIAA1644	85352	gene_synonym	H. sapiens	85352	H. sapiens	SHISAL1	shisa like 1				Cytosol;Vesicles (Approved)				0	0	0	0	0	0	0	0	0	0	0	0	0	0	0	0	0	0	0	0
KIF3B	9371	symbol	H. sapiens	9371	H. sapiens	KIF3B	kinesin family member 3B	GO:0036372 opsin transport;GO:0098971 anterograde dendritic transport of neurotransmitter receptor complex;GO:0072383 plus-end-directed vesicle transport along microtubule		Predicted intracellular proteins	Nucleoplasm (Uncertain); Additional: Golgi apparatus;Nucleoli			(M5893)HALLMARK MITOTIC SPINDLE	0	0	1	0	0	0	0	0	0	1	0	0	0	0	0	0	0	0	0	0
KPRP	448834	symbol	H. sapiens	448834	H. sapiens	KPRP	keratinocyte proline rich protein			Predicted intracellular proteins					0	0	0	0	0	0	0	0	0	0	0	0	0	0	0	0	0	0	0	0
KRIT1	889	symbol	H. sapiens	889	H. sapiens	KRIT1	KRIT1 ankyrin repeat containing	GO:2000114 regulation of establishment of cell polarity;GO:0032878 regulation of establishment or maintenance of cell polarity;GO:0045454 cell redox homeostasis		Predicted intracellular proteins; Disease related genes	Vesicles (Uncertain)				0	0	0	0	0	0	0	0	0	0	0	1	0	0	0	0	0	0	0	0
LAMA4	3910	symbol	H. sapiens	3910	H. sapiens	LAMA4	laminin subunit alpha 4	GO:0120163 negative regulation of cold-induced thermogenesis;GO:0045995 regulation of embryonic development;GO:0106106 cold-induced thermogenesis		Predicted intracellular proteins; Predicted secreted proteins; Disease related genes	Cytosol;Plasma membrane (Approved)		(M176)PID FOXM1 PATHWAY; (M5887)NABA BASEMENT MEMBRANES; (M53)PID INTEGRIN3 PATHWAY	(M5905)HALLMARK ADIPOGENESIS	0	1	0	0	1	0	1	0	0	0	0	1	0	0	0	0	0	0	0	0
LINC00595	414243	symbol	H. sapiens	414243	H. sapiens	LINC00595	long intergenic non-protein coding RNA 595								0	0	0	0	0	0	0	0	0	0	0	0	0	0	0	0	0	0	0	0
LINC00702	100652988	symbol	H. sapiens	100652988	H. sapiens	LINC00702	long intergenic non-protein coding RNA 702								0	0	0	0	0	0	0	0	0	0	0	0	0	0	0	0	0	0	0	0
LINC00856	100132987	symbol	H. sapiens	100132987	H. sapiens	LINC00856	long intergenic non-protein coding RNA 856								0	0	0	0	0	0	0	0	0	0	0	0	0	0	0	0	0	0	0	0
LINC01119	100134259	symbol	H. sapiens	100134259	H. sapiens	LINC01119	long intergenic non-protein coding RNA 1119								0	0	0	0	0	0	0	0	0	0	0	0	0	0	0	0	0	0	0	0
LINC01252	338817	symbol	H. sapiens	338817	H. sapiens	LINC01252	long intergenic non-protein coding RNA 1252								0	0	0	0	0	0	0	0	0	0	0	0	0	0	0	0	0	0	0	0
LINC01272	100506115	gene_synonym	H. sapiens	100506115	H. sapiens	PELATON	plaque enriched lncRNA in atherosclerotic and inflammatory bowel macrophage regulation								0	0	0	0	0	0	0	0	0	0	0	0	0	0	0	0	0	0	0	0
LINC01279	151887	gene_synonym	H. sapiens	151887	H. sapiens	CCDC80	coiled-coil domain containing 80	GO:0010811 positive regulation of cell-substrate adhesion;GO:0010810 regulation of cell-substrate adhesion;GO:0030198 extracellular matrix organization		Predicted intracellular proteins; Predicted secreted proteins					0	1	0	0	0	0	1	0	0	0	0	0	0	0	0	0	0	0	0	0
LINC01436	100996609	symbol	H. sapiens	100996609	H. sapiens	LINC01436	long intergenic non-protein coding RNA 1436								0	0	0	0	0	0	0	0	0	0	0	0	0	0	0	0	0	0	0	0
LINC01550	388011	symbol	H. sapiens	388011	H. sapiens	LINC01550	long intergenic non-protein coding RNA 1550								0	0	0	0	0	0	0	0	0	0	0	0	0	0	0	0	0	0	0	0
LIPC	3990	symbol	H. sapiens	3990	H. sapiens	LIPC	lipase C, hepatic type	GO:0034373 intermediate-density lipoprotein particle remodeling;GO:0034382 chylomicron remnant clearance;GO:0071830 triglyceride-rich lipoprotein particle clearance		Predicted secreted proteins; ENZYME proteins:Hydrolases; Enzymes; Disease related genes; Potential drug targets					0	0	0	0	0	1	0	0	0	0	0	0	0	0	0	0	1	0	0	1
LNX1	84708	symbol	H. sapiens	84708	H. sapiens	LNX1	ligand of numb-protein X 1	GO:0006511 ubiquitin-dependent protein catabolic process;GO:0019941 modification-dependent protein catabolic process;GO:0043632 modification-dependent macromolecule catabolic process		ENZYME proteins:Transferases; Predicted intracellular proteins; Enzymes	Cell Junctions (Supported); Additional: Cytosol		(M17)PID NOTCH PATHWAY		0	0	0	0	0	0	0	0	0	0	0	0	0	0	0	0	0	0	0	0
LOC100049716	100049716	Gene_ID	H. sapiens	100049716	H. sapiens	NINJ2-AS1	NINJ2 antisense RNA 1								0	0	0	0	0	0	0	0	0	0	0	0	0	0	0	0	0	0	0	0
LOC100287846	100287846	Gene_ID	H. sapiens	100287846	H. sapiens	LOC100287846	uncharacterized LOC100287846								0	0	0	0	0	0	0	0	0	0	0	0	0	0	0	0	0	0	0	0
LOC101927204	101927204	Gene_ID	H. sapiens	101927204	H. sapiens	FAM111A-DT	FAM111A divergent transcript								0	0	0	0	0	0	0	0	0	0	0	0	0	0	0	0	0	0	0	0
LOC101928370	101928370	Gene_ID	H. sapiens	101928370	H. sapiens	LOC101928370	uncharacterized LOC101928370								0	0	0	0	0	0	0	0	0	0	0	0	0	0	0	0	0	0	0	0
LOC105375734	105375734	Gene_ID	H. sapiens	105375734	H. sapiens	SMILR	smooth muscle induced lncRNA, enhancer of proliferation								0	0	0	0	0	0	0	0	0	0	0	0	0	0	0	0	0	0	0	0
LOC285043	285043	Gene_ID	H. sapiens	285043	H. sapiens	LINC01936	long intergenic non-protein coding RNA 1936								0	0	0	0	0	0	0	0	0	0	0	0	0	0	0	0	0	0	0	0
LOC653602	151354	Gene_ID	H. sapiens	151354	H. sapiens	LRATD1	LRAT domain containing 1	GO:0000902 cell morphogenesis;GO:0048870 cell motility;GO:0051674 localization of cell		Predicted intracellular proteins	Nucleoplasm (Approved)				0	0	0	0	0	0	0	0	0	0	0	0	0	0	0	0	0	0	0	0
LPXN	9404	symbol	H. sapiens	9404	H. sapiens	LPXN	leupaxin	GO:0050859 negative regulation of B cell receptor signaling pathway;GO:0050855 regulation of B cell receptor signaling pathway;GO:0050858 negative regulation of antigen receptor-mediated signaling pathway		Predicted intracellular proteins	Focal adhesion sites (Supported); Additional: Cytosol;Nuclear speckles				0	0	0	0	0	0	1	0	0	0	0	0	0	0	0	0	0	0	0	0
LRRC6	23639	gene_synonym	H. sapiens	23639	H. sapiens	DNAAF11	dynein axonemal assembly factor 11	GO:0120229 protein localization to motile cilium;GO:0090660 cerebrospinal fluid circulation;GO:0060287 epithelial cilium movement involved in determination of left/right asymmetry		Predicted intracellular proteins; Disease related genes					0	0	1	0	0	0	0	0	0	0	0	0	0	0	0	0	0	0	0	0
LRRFIP2	9209	symbol	H. sapiens	9209	H. sapiens	LRRFIP2	LRR binding FLII interacting protein 2	GO:0016055 Wnt signaling pathway;GO:0198738 cell-cell signaling by wnt;GO:1905114 cell surface receptor signaling pathway involved in cell-cell signaling		Predicted intracellular proteins; Transcription factors:Yet undefined DNA-binding domains	Actin filaments;Plasma membrane (Approved)				1	0	0	0	0	0	0	0	0	0	0	0	0	0	0	0	0	0	0	0
LVCAT1	100506827	gene_synonym	H. sapiens	100506827	H. sapiens	LINC02475	long intergenic non-protein coding RNA 2475								0	0	0	0	0	0	0	0	0	0	0	0	0	0	0	0	0	0	0	0
MACROD2	140733	symbol	H. sapiens	140733	H. sapiens	MACROD2	mono-ADP ribosylhydrolase 2	GO:0140291 peptidyl-glutamate ADP-deribosylation;GO:0051725 protein de-ADP-ribosylation;GO:0042278 purine nucleoside metabolic process		Predicted intracellular proteins	Nucleoli;Nucleoplasm (Supported)				0	0	0	0	0	0	0	0	0	0	0	0	0	0	0	0	0	0	0	0
MAOA	4128	symbol	H. sapiens	4128	H. sapiens	MAOA	monoamine oxidase A	GO:0042420 dopamine catabolic process;GO:0042135 neurotransmitter catabolic process;GO:0019614 catechol-containing compound catabolic process		FDA approved drug targets:Small molecule drugs; Enzymes; ENZYME proteins:Oxidoreductases; Disease related genes	Mitochondria (Enhanced); Additional: Cytosol	Amphetamine; Phentermine; Procaine; Tranylcypromine; Phenelzine; Minaprine; Zonisamide; Selegiline; Procarbazine; Moclobemide; Isocarboxazid; Ephedra sinica root; MMDA; 4-Methoxyamphetamine; Metamfetamine; Pargyline; Flavin adenine dinucleotide; Clorgiline; Nialamide; Nomifensine; Zimelidine; Posizolid; CX157; Decyl(dimethyl)phosphine oxide; Harmine; Pirlindole; Toloxatone; Brofaromine; Flortauci…		(M5935)HALLMARK FATTY ACID METABOLISM; (M5941)HALLMARK UV RESPONSE UP; (M5934)HALLMARK XENOBIOTIC METABOLISM	0	0	0	0	0	0	0	1	0	0	0	0	0	0	0	0	0	1	0	0
MAOB	4129	symbol	H. sapiens	4129	H. sapiens	MAOB	monoamine oxidase B	GO:0045915 positive regulation of catecholamine metabolic process;GO:0045964 positive regulation of dopamine metabolic process;GO:0010044 response to aluminum ion		Enzymes; ENZYME proteins:Oxidoreductases; FDA approved drug targets:Small molecule drugs		Amphetamine; Phentermine; Tranylcypromine; Phenelzine; Zonisamide; Selegiline; Pioglitazone; Moclobemide; Isocarboxazid; Ephedra sinica root; Rasagiline; MMDA; 4-Methoxyamphetamine; Metamfetamine; Pargyline; Isatin; (R)-N-methyl-N-2-propynyl-1-indanamine; Farnesol; N-Dodecyl-N,N-Dimethyl-3-Ammonio-1-Propanesulfonate; Flavin adenine dinucleotide; N-Propargyl-1(S)-Aminoindan; Dodecyldimethylamine N…	(M275)PID ALPHA SYNUCLEIN PATHWAY	(M5936)HALLMARK OXIDATIVE PHOSPHORYLATION	0	0	0	0	0	0	0	0	0	0	0	0	0	1	0	0	0	1	0	0
MAP4K4	9448	symbol	H. sapiens	9448	H. sapiens	MAP4K4	mitogen-activated protein kinase kinase kinase kinase 4	GO:0032014 positive regulation of ARF protein signal transduction;GO:0120180 cell-substrate junction disassembly;GO:0120181 focal adhesion disassembly	STE Ser/Thr protein kinase family	ENZYME proteins:Transferases; Predicted intracellular proteins; Kinases:STE Ser/Thr protein kinases; Enzymes		Fostamatinib	(M62)PID EPHB FWD PATHWAY; (M144)PID CERAMIDE PATHWAY; (M128)PID TNF PATHWAY		0	1	1	1	1	0	1	0	0	0	0	0	1	0	1	0	0	1	0	0
MAPK1	5594	symbol	H. sapiens	5594	H. sapiens	MAPK1	mitogen-activated protein kinase 1	GO:0019858 cytosine metabolic process;GO:0015960 diadenosine polyphosphate biosynthetic process;GO:0015965 diadenosine tetraphosphate metabolic process	CMGC Ser/Thr protein kinase family	Cancer-related genes:Candidate cancer biomarkers; ENZYME proteins:Transferases; RAS pathway related proteins; Predicted intracellular proteins; FDA approved drug targets:Small molecule drugs; Kinases:CMGC Ser/Thr protein kinases; Enzymes		Acetylsalicylic acid; Minocycline; Isoprenaline; Arsenic trioxide; Olomoucine; Phosphonothreonine; Purvalanol; SB220025; Seliciclib; Perifosine; N,N-DIMETHYL-4-(4-PHENYL-1H-PYRAZOL-3-YL)-1H-PYRROLE-2-CARBOXAMIDE; N-BENZYL-4-[4-(3-CHLOROPHENYL)-1H-PYRAZOL-3-YL]-1H-PYRROLE-2-CARBOXAMIDE; (S)-N-(1-(3-CHLORO-4-FLUOROPHENYL)-2-HYDROXYETHYL)-4-(4-(3-CHLOROPHENYL)-1H-PYRAZOL-3-YL)-1H-PYRROLE-2-CARBOXAMI…	(M64)PID S1P S1P4 PATHWAY; (M134)PID TCR RAS PATHWAY; (M120)PID ARF6 DOWNSTREAM PATHWAY	(M5910)HALLMARK PROTEIN SECRETION; (M5923)HALLMARK PI3K AKT MTOR SIGNALING	1	0	0	1	1	1	0	1	0	1	0	1	1	1	1	1	0	0	1	0
MAPK13	5603	symbol	H. sapiens	5603	H. sapiens	MAPK13	mitogen-activated protein kinase 13	GO:0072740 cellular response to anisomycin;GO:0072739 response to anisomycin;GO:0072709 cellular response to sorbitol	CMGC Ser/Thr protein kinase family	ENZYME proteins:Transferases; Predicted intracellular proteins; Kinases:CMGC Ser/Thr protein kinases; Enzymes	Cytosol;Nucleoli;Nucleoli rim;Nucleoplasm (Approved)	KC706; Fostamatinib	(M209)PID P38 GAMMA DELTA PATHWAY; (M12705)SIG CD40PATHWAYMAP; (M12012)ST P38 MAPK PATHWAY	(M5907)HALLMARK ESTROGEN RESPONSE LATE; (M5915)HALLMARK APICAL JUNCTION	1	0	0	0	1	0	0	0	0	0	0	1	0	1	1	0	0	0	0	0
MAPK14	1432	symbol	H. sapiens	1432	H. sapiens	MAPK14	mitogen-activated protein kinase 14	GO:0099179 regulation of synaptic membrane adhesion;GO:0090400 stress-induced premature senescence;GO:0070391 response to lipoteichoic acid	CMGC Ser/Thr protein kinase family	Cancer-related genes:Candidate cancer biomarkers; ENZYME proteins:Transferases; Predicted intracellular proteins; Kinases:CMGC Ser/Thr protein kinases; Enzymes	Nuclear speckles (Supported); Additional: Cytosol	Dasatinib; 4-[5-[2-(1-phenyl-ethylamino)-pyrimidin-4-yl]-1-methyl-4-(3-trifluoromethylphenyl)-1H-imidazol-2-yl]-piperidine; N-[(3Z)-5-Tert-butyl-2-phenyl-1,2-dihydro-3H-pyrazol-3-ylidene]-N'-(4-chlorophenyl)urea; 1-(2,6-Dichlorophenyl)-5-(2,4-Difluorophenyl)-7-Piperidin-4-Yl-3,4-Dihydroquinolin-2(1h)-One; Inhibitor of P38 Kinase; 6((S)-3-Benzylpiperazin-1-Yl)-3-(Naphthalen-2-Yl)-4-(Pyridin-4-Yl)P…	(M26)PID NFKAPPAB ATYPICAL PATHWAY; (M199)PID P38 MK2 PATHWAY; (M268)PID S1P S1P2 PATHWAY	(M5942)HALLMARK UV RESPONSE DN; (M5901)HALLMARK G2M CHECKPOINT; (M5915)HALLMARK APICAL JUNCTION	1	0	0	0	1	0	1	1	0	1	0	1	0	1	1	0	0	0	0	0
MAPK9	5601	symbol	H. sapiens	5601	H. sapiens	MAPK9	mitogen-activated protein kinase 9	GO:0061833 protein localization to tricellular tight junction;GO:1901483 regulation of transcription factor catabolic process;GO:1901485 positive regulation of transcription factor catabolic process	CMGC Ser/Thr protein kinase family	ENZYME proteins:Transferases; RAS pathway related proteins; Predicted intracellular proteins; Kinases:CMGC Ser/Thr protein kinases; Enzymes		N-{3-[5-(1H-1,2,4-triazol-3-yl)-1H-indazol-3-yl]phenyl}furan-2-carboxamide; Fostamatinib	(M7871)ST GRANULE CELL SURVIVAL PATHWAY; (M45)PID CD40 PATHWAY; (M193)PID NEPHRIN NEPH1 PATHWAY	(M5923)HALLMARK PI3K AKT MTOR SIGNALING	1	0	0	0	1	0	0	1	0	0	0	0	1	0	0	0	0	0	0	0
MASP1	5648	symbol	H. sapiens	5648	H. sapiens	MASP1	MBL associated serine protease 1	GO:0001867 complement activation, lectin pathway;GO:0006956 complement activation;GO:0006959 humoral immune response		Predicted intracellular proteins; Predicted secreted proteins; Peptidases:Serine-type peptidases; Enzymes; Disease related genes; Potential drug targets	Cytosol;Nucleoplasm (Enhanced)		(M3468)NABA ECM REGULATORS; (M5885)NABA MATRISOME ASSOCIATED; (M5889)NABA MATRISOME		0	0	0	0	0	0	0	0	0	0	0	0	0	0	0	0	0	0	0	0
MCOLN3	55283	symbol	H. sapiens	55283	H. sapiens	MCOLN3	mucolipin TRP cation channel 3	GO:0042491 inner ear auditory receptor cell differentiation;GO:0035315 hair cell differentiation;GO:0060113 inner ear receptor cell differentiation		Transporters:Transporter channels and pores; Voltage-gated ion channels:Transient Receptor Potential Channels	Cytosol;Nucleoli (Approved)				0	0	0	0	0	0	0	0	0	0	0	0	0	0	0	0	0	0	1	1
MED14	9282	symbol	H. sapiens	9282	H. sapiens	MED14	mediator complex subunit 14	GO:0060261 positive regulation of transcription initiation from RNA polymerase II promoter;GO:2000144 positive regulation of DNA-templated transcription, initiation;GO:0060260 regulation of transcription initiation from RNA polymerase II promoter		Predicted intracellular proteins	Nucleoplasm (Approved)				0	0	0	0	1	1	0	0	0	0	0	0	0	0	0	0	0	0	0	0
MEF2A	4205	symbol	H. sapiens	4205	H. sapiens	MEF2A	myocyte enhancer factor 2A	GO:0055005 ventricular cardiac myofibril assembly;GO:0070375 ERK5 cascade;GO:0055015 ventricular cardiac muscle cell development		Transcription factors:alpha-Helices exposed by beta-structures; Cancer-related genes:Mutational cancer driver genes; Disease related genes; Predicted intracellular proteins	Nucleoplasm (Supported)		(M229)PID P38 ALPHA BETA DOWNSTREAM PATHWAY	(M5909)HALLMARK MYOGENESIS	1	0	0	0	1	0	1	1	0	0	0	1	1	0	0	0	0	0	0	0
MILR1	284021	symbol	H. sapiens	284021	H. sapiens	MILR1	mast cell immunoglobulin like receptor 1	GO:0033004 negative regulation of mast cell activation;GO:0033003 regulation of mast cell activation;GO:0043303 mast cell degranulation		Predicted intracellular proteins					0	0	0	0	0	0	0	0	0	0	0	0	0	0	0	0	0	1	0	0
MIPEP	4285	symbol	H. sapiens	4285	H. sapiens	MIPEP	mitochondrial intermediate peptidase	GO:0006627 protein processing involved in protein targeting to mitochondrion;GO:0034982 mitochondrial protein processing;GO:0006626 protein targeting to mitochondrion		Predicted intracellular proteins; ENZYME proteins:Hydrolases; Enzymes; Disease related genes; Potential drug targets; Peptidases:Metallopeptidases	Mitochondria (Enhanced)				0	0	0	0	0	0	0	0	0	0	0	0	0	0	0	0	0	0	0	0
MIR100HG	399959	symbol	H. sapiens	399959	H. sapiens	MIR100HG	mir-100-let-7a-2-mir-125b-1 cluster host gene								0	0	0	0	0	0	0	0	0	0	0	0	0	0	0	0	0	0	0	0
MIR497HG	100506755	symbol	H. sapiens	100506755	H. sapiens	MIR497HG	mir-497-195 cluster host gene								0	0	0	0	0	0	0	0	0	0	0	0	0	0	0	0	0	0	0	0
MMP12	4321	symbol	H. sapiens	4321	H. sapiens	MMP12	matrix metallopeptidase 12	GO:1904905 negative regulation of endothelial cell-matrix adhesion via fibronectin;GO:0060309 elastin catabolic process;GO:0060435 bronchiole development		Cancer-related genes:Candidate cancer biomarkers; Predicted secreted proteins; FDA approved drug targets:Small molecule drugs; ENZYME proteins:Hydrolases; Enzymes; Peptidases:Metallopeptidases		Acetohydroxamic acid; Marimastat; CP-271485; PF-00356231; Batimastat; 2-[2-(1,3-Dioxo-1,3-Dihydro-2h-Isoindol-2-Yl)Ethyl]-4-(4'-Ethoxy-1,1'-Biphenyl-4-Yl)-4-Oxobutanoic Acid; AE-941; (1S,5S,7R)-N~7~-(BIPHENYL-4-YLMETHYL)-N~3~-HYDROXY-6,8-DIOXA-3-AZABICYCLO[3.2.1]OCTANE-3,7-DICARBOXAMIDE; N-(biphenyl-4-ylsulfonyl)-D-leucine; CGS-27023; N-(dibenzo[b,d]thiophen-3-ylsulfonyl)-L-valine; N-oxo-2-[(4-ph…	(M174)PID UPA UPAR PATHWAY; (M3468)NABA ECM REGULATORS; (M5885)NABA MATRISOME ASSOCIATED	(M5921)HALLMARK COMPLEMENT	0	1	0	0	1	0	1	0	0	1	0	0	0	1	1	0	0	0	0	0
MMP2	4313	symbol	H. sapiens	4313	H. sapiens	MMP2	matrix metallopeptidase 2	GO:0001957 intramembranous ossification;GO:0036072 direct ossification;GO:0001955 blood vessel maturation		Cancer-related genes:Candidate cancer biomarkers; Candidate cardiovascular disease genes; Predicted intracellular proteins; Predicted secreted proteins; FDA approved drug targets:Small molecule drugs; ENZYME proteins:Hydrolases; Enzymes; Disease related genes; Cancer-related genes:Mutational cancer driver genes; Peptidases:Metallopeptidases	Vesicles (Approved)	Marimastat; Captopril; SC-74020; Halofuginone; AE-941; Endostatin	(M63)PID AVB3 OPN PATHWAY; (M240)PID SYNDECAN 2 PATHWAY; (M65)PID FRA PATHWAY	(M5946)HALLMARK COAGULATION; (M5902)HALLMARK APOPTOSIS; (M5915)HALLMARK APICAL JUNCTION	1	1	0	0	1	0	0	1	0	0	1	0	0	1	0	0	0	0	0	0
MOB3B	79817	symbol	H. sapiens	79817	H. sapiens	MOB3B	MOB kinase activator 3B	GO:0035330 regulation of hippo signaling;GO:0035329 hippo signaling;GO:1902531 regulation of intracellular signal transduction		Predicted intracellular proteins	Cytosol;Intermediate filaments (Uncertain)				0	0	0	0	0	0	0	0	0	0	0	0	0	0	0	0	0	0	0	0
MOSPD2	158747	symbol	H. sapiens	158747	H. sapiens	MOSPD2	motile sperm domain containing 2	GO:0090026 positive regulation of monocyte chemotaxis;GO:0090023 positive regulation of neutrophil chemotaxis;GO:0071624 positive regulation of granulocyte chemotaxis		Predicted intracellular proteins	Endoplasmic reticulum (Approved)				0	0	0	0	0	0	0	0	0	0	0	0	0	0	1	0	0	0	0	0
MOXD1	26002	symbol	H. sapiens	26002	H. sapiens	MOXD1	monooxygenase DBH like 1	GO:0006589 octopamine biosynthetic process;GO:0046333 octopamine metabolic process;GO:0042421 norepinephrine biosynthetic process		Predicted intracellular proteins	Cytosol (Approved)				0	0	0	0	0	0	0	0	0	0	0	0	0	0	0	0	0	1	0	0
MSTN	2660	symbol	H. sapiens	2660	H. sapiens	MSTN	myostatin	GO:0048632 negative regulation of skeletal muscle tissue growth;GO:0014839 myoblast migration involved in skeletal muscle regeneration;GO:0014859 negative regulation of skeletal muscle cell proliferation		Predicted secreted proteins; Disease related genes		MYO-029	(M5883)NABA SECRETED FACTORS; (M5885)NABA MATRISOME ASSOCIATED; (M5889)NABA MATRISOME		1	0	1	1	0	0	0	0	0	0	0	0	1	1	1	0	0	0	0	0
MTURN	222166	symbol	H. sapiens	222166	H. sapiens	MTURN	maturin, neural progenitor differentiation regulator homolog	GO:0045654 positive regulation of megakaryocyte differentiation;GO:0045652 regulation of megakaryocyte differentiation;GO:0030219 megakaryocyte differentiation		Predicted intracellular proteins	Cytosol (Approved)				0	0	0	0	1	0	0	0	0	0	0	0	0	0	0	0	0	0	0	0
MYH2	4620	symbol	H. sapiens	4620	H. sapiens	MYH2	myosin heavy chain 2	GO:0030049 muscle filament sliding;GO:0033275 actin-myosin filament sliding;GO:0070252 actin-mediated cell contraction		Predicted intracellular proteins; Disease related genes			(M277)PID INTEGRIN A4B1 PATHWAY; (M16801)SIG REGULATION OF THE ACTIN CYTOSKELETON BY RHO GTPASES; (M159)PID AMB2 NEUTROPHILS PATHWAY	(M5909)HALLMARK MYOGENESIS	1	0	0	0	0	0	0	0	0	0	0	0	1	0	0	0	0	0	0	0
MYOC	4653	symbol	H. sapiens	4653	H. sapiens	MYOC	myocilin	GO:0038133 ERBB2-ERBB3 signaling pathway;GO:0038129 ERBB3 signaling pathway;GO:0014734 skeletal muscle hypertrophy		Predicted secreted proteins; Disease related genes					1	0	0	0	0	0	1	0	0	0	0	0	1	0	1	0	0	0	1	0
NAAA	27163	symbol	H. sapiens	27163	H. sapiens	NAAA	N-acylethanolamine acid amidase	GO:0070291 N-acylethanolamine metabolic process;GO:0042439 ethanolamine-containing compound metabolic process;GO:0070292 N-acylphosphatidylethanolamine metabolic process		Predicted intracellular proteins		Cannabidiol; Medical Cannabis; Nabiximols			0	0	0	0	0	1	0	0	0	0	0	0	0	0	0	0	0	0	0	0
NAT1	9	symbol	H. sapiens	9	H. sapiens	NAT1	N-acetyltransferase 1	GO:0006805 xenobiotic metabolic process;GO:0071466 cellular response to xenobiotic stimulus;GO:0009410 response to xenobiotic stimulus		ENZYME proteins:Transferases; Predicted intracellular proteins; Enzymes				(M5941)HALLMARK UV RESPONSE UP	0	0	0	0	0	0	0	0	0	0	0	0	0	0	0	0	0	0	0	0
NCALD	83988	symbol	H. sapiens	83988	H. sapiens	NCALD	neurocalcin delta	GO:0003073 regulation of systemic arterial blood pressure;GO:0008217 regulation of blood pressure;GO:0019722 calcium-mediated signaling		Predicted intracellular proteins					0	0	0	0	0	0	0	0	0	0	0	0	0	0	0	0	0	0	0	0
NCK1	4690	symbol	H. sapiens	4690	H. sapiens	NCK1	NCK adaptor protein 1	GO:1903674 regulation of cap-dependent translational initiation;GO:1903676 positive regulation of cap-dependent translational initiation;GO:0002191 cap-dependent translational initiation		Predicted intracellular proteins	Cytosol;Plasma membrane (Enhanced)		(M226)PID VEGFR1 PATHWAY; (M193)PID NEPHRIN NEPH1 PATHWAY; (M108)PID NETRIN PATHWAY	(M5923)HALLMARK PI3K AKT MTOR SIGNALING; (M5893)HALLMARK MITOTIC SPINDLE; (M5950)HALLMARK ALLOGRAFT REJECTION	1	0	1	1	1	0	1	0	0	0	0	1	1	1	0	0	0	0	0	0
NCOA4	8031	symbol	H. sapiens	8031	H. sapiens	NCOA4	nuclear receptor coactivator 4	GO:0071394 cellular response to testosterone stimulus;GO:0071391 cellular response to estrogen stimulus;GO:0006622 protein targeting to lysosome		Cancer-related genes:Mutational cancer driver genes; Disease related genes; Predicted intracellular proteins	Nucleoli (Approved); Additional: Cytosol;Golgi apparatus		(M58)PID AR PATHWAY	(M5908)HALLMARK ANDROGEN RESPONSE; (M5945)HALLMARK HEME METABOLISM	0	0	0	0	1	0	0	0	0	0	0	0	0	1	0	0	0	0	1	0
NDRG2	57447	symbol	H. sapiens	57447	H. sapiens	NDRG2	NDRG family member 2	GO:0090360 platelet-derived growth factor production;GO:0090361 regulation of platelet-derived growth factor production;GO:0021762 substantia nigra development		Predicted intracellular proteins	Centriolar satellite (Approved); Additional: Cytosol;Nucleoplasm		(M254)PID MYC REPRESS PATHWAY	(M5934)HALLMARK XENOBIOTIC METABOLISM	0	0	0	0	0	0	0	0	0	0	0	0	0	0	0	0	0	0	0	0
NEK1	4750	symbol	H. sapiens	4750	H. sapiens	NEK1	NIMA related kinase 1	GO:0042769 DNA damage response, detection of DNA damage;GO:0060271 cilium assembly;GO:0018108 peptidyl-tyrosine phosphorylation	NEK Ser/Thr protein kinase family	ENZYME proteins:Transferases; Predicted intracellular proteins; Enzymes; Disease related genes; Kinases:NEK Ser/Thr protein kinases; Potential drug targets	Cytosol (Supported); Additional: Centriolar satellite;Nucleoplasm	Fostamatinib	(M10154)SA G2 AND M PHASES		0	0	1	0	0	0	0	0	0	0	0	0	0	0	0	0	0	0	0	0
NEK11	79858	symbol	H. sapiens	79858	H. sapiens	NEK11	NIMA related kinase 11	GO:0031573 mitotic intra-S DNA damage checkpoint signaling;GO:0016572 histone phosphorylation;GO:0044773 mitotic DNA damage checkpoint signaling	NEK Ser/Thr protein kinase family	ENZYME proteins:Transferases; Predicted intracellular proteins; Kinases:NEK Ser/Thr protein kinases; Enzymes	Nucleoplasm (Supported)	Dabrafenib; Fostamatinib			0	0	0	0	0	0	0	0	0	0	0	0	0	0	0	0	0	0	0	0
NFASC	23114	symbol	H. sapiens	23114	H. sapiens	NFASC	neurofascin	GO:0019226 transmission of nerve impulse;GO:0007422 peripheral nervous system development;GO:0042552 myelination		Predicted intracellular proteins				(M5915)HALLMARK APICAL JUNCTION	0	0	0	0	0	0	1	0	1	0	0	0	0	0	1	0	0	0	0	0
NINJ2	4815	symbol	H. sapiens	4815	H. sapiens	NINJ2	ninjurin 2	GO:0007158 neuron cell-cell adhesion;GO:0042246 tissue regeneration;GO:0031099 regeneration			Endoplasmic reticulum (Approved); Additional: Centriolar satellite;Cytosol;Nucleoplasm;Plasma membrane				0	0	0	0	0	0	0	0	0	0	0	0	0	0	0	0	0	0	0	0
NIPAL2	79815	symbol	H. sapiens	79815	H. sapiens	NIPAL2	NIPA like domain containing 2	GO:1903830 magnesium ion transmembrane transport;GO:0015693 magnesium ion transport;GO:0098662 inorganic cation transmembrane transport							0	0	0	0	0	0	0	0	0	0	0	0	0	0	0	0	0	0	0	1
NLRP1	22861	symbol	H. sapiens	22861	H. sapiens	NLRP1	NLR family pyrin domain containing 1	GO:1904784 NLRP1 inflammasome complex assembly;GO:0097264 self proteolysis;GO:0140374 antiviral innate immune response		Predicted intracellular proteins; Disease related genes	Cytosol;Nucleoplasm (Supported)		(M267)PID ANTHRAX PATHWAY		0	0	0	0	1	0	0	0	0	0	0	0	0	1	0	0	0	0	0	0
NOSTRIN	115677	symbol	H. sapiens	115677	H. sapiens	NOSTRIN	nitric oxide synthase trafficking	GO:0006897 endocytosis;GO:0045892 negative regulation of transcription, DNA-templated;GO:1903507 negative regulation of nucleic acid-templated transcription		Predicted intracellular proteins	Cytosol (Approved); Additional: Vesicles				0	0	0	0	0	0	0	0	0	0	0	0	0	0	0	1	0	0	0	0
NR3C1	2908	symbol	H. sapiens	2908	H. sapiens	NR3C1	nuclear receptor subfamily 3 group C member 1	GO:0043402 glucocorticoid mediated signaling pathway;GO:0042921 glucocorticoid receptor signaling pathway;GO:0031958 corticosteroid receptor signaling pathway		Transcription factors:Zinc-coordinating DNA-binding domains; Predicted intracellular proteins; FDA approved drug targets:Small molecule drugs; Disease related genes; Nuclear receptors	Cytosol;Nucleoplasm (Supported); Additional: Mitochondria	Flunisolide; Diflorasone; Alclometasone; Medrysone; Amcinonide; Fluorometholone; Megestrol acetate; Levonorgestrel; Beclomethasone dipropionate; Progesterone; Spironolactone; Betamethasone; Desoximetasone; Fluticasone propionate; Fluocinolone acetonide; Ulobetasol; Triamcinolone; Prednisone; Flumethasone; Fludrocortisone; Norethisterone; Hydrocortisone; Mometasone; Hydrocortamate; Mifepristone; C…	(M30)PID HDAC CLASSII PATHWAY; (M106)PID HNF3B PATHWAY; (M151)PID AR TF PATHWAY	(M5942)HALLMARK UV RESPONSE DN; (M5891)HALLMARK HYPOXIA; (M5945)HALLMARK HEME METABOLISM	0	0	0	0	1	0	0	0	0	0	0	1	0	1	0	0	0	0	0	0
NUMB	8650	symbol	H. sapiens	8650	H. sapiens	NUMB	NUMB endocytic adaptor protein	GO:0021849 neuroblast division in subventricular zone;GO:0099149 regulation of postsynaptic neurotransmitter receptor internalization;GO:0021670 lateral ventricle development		Cancer-related genes:Candidate cancer biomarkers; Predicted intracellular proteins	Cell Junctions (Enhanced)		(M17)PID NOTCH PATHWAY; (M48)PID MET PATHWAY	(M5895)HALLMARK WNT BETA CATENIN SIGNALING	1	0	0	0	1	0	1	0	1	0	0	0	0	0	1	1	0	1	0	0
OLFM1	10439	symbol	H. sapiens	10439	H. sapiens	OLFM1	olfactomedin 1	GO:0023041 neuronal signal transduction;GO:0003190 atrioventricular valve formation;GO:0003188 heart valve formation		Predicted intracellular proteins; Predicted secreted proteins	Nucleoli (Approved); Additional: Cytosol;Nucleoplasm			(M5941)HALLMARK UV RESPONSE UP; (M5906)HALLMARK ESTROGEN RESPONSE EARLY; (M5907)HALLMARK ESTROGEN RESPONSE LATE	0	0	0	0	0	0	0	0	0	0	0	0	0	0	0	0	0	0	0	0
OSBPL3	26031	symbol	H. sapiens	26031	H. sapiens	OSBPL3	oxysterol binding protein like 3	GO:0006699 bile acid biosynthetic process;GO:0008206 bile acid metabolic process;GO:0015918 sterol transport		Predicted intracellular proteins	Cytosol (Supported); Additional: Nucleoli				0	0	0	0	0	1	0	0	0	0	0	0	0	0	0	0	1	0	0	0
P2RY1	5028	symbol	H. sapiens	5028	H. sapiens	P2RY1	purinergic receptor P2Y1	GO:0060406 positive regulation of penile erection;GO:0032962 positive regulation of inositol trisphosphate biosynthetic process;GO:0032960 regulation of inositol trisphosphate biosynthetic process		G-protein coupled receptors:Adenosine and adenine nucleotide receptors; Transporters; G-protein coupled receptors:GPCRs excl olfactory receptors				(M5946)HALLMARK COAGULATION	0	0	0	0	0	1	0	0	1	1	0	1	0	1	0	1	0	1	1	0
PAM	5066	symbol	H. sapiens	5066	H. sapiens	PAM	peptidylglycine alpha-amidating monooxygenase	GO:0018032 protein amidation;GO:0062112 fatty acid primary amide biosynthetic process;GO:0062126 fatty acid primary amide metabolic process		ENZYME proteins:Lyases; Predicted intracellular proteins; Predicted secreted proteins; Enzymes; ENZYME proteins:Oxidoreductases	Cytosol;Golgi apparatus (Approved)	Ascorbic acid; N-Alpha-Acetyl-3,5-Diiodotyrosylglycine; N-alpha-Acetyl-3,5-diiodotyrosyl-D-threonine		(M5910)HALLMARK PROTEIN SECRETION; (M5891)HALLMARK HYPOXIA; (M5937)HALLMARK GLYCOLYSIS	0	0	0	0	0	1	0	0	0	1	0	0	1	1	0	0	0	1	0	0
PAQR5	54852	symbol	H. sapiens	54852	H. sapiens	PAQR5	progestin and adipoQ receptor family member 5	GO:0048477 oogenesis;GO:0007292 female gamete generation;GO:0007281 germ cell development			Vesicles (Approved)				0	0	0	0	0	0	0	0	0	0	0	0	0	0	0	0	0	0	0	0
PARP4	143	symbol	H. sapiens	143	H. sapiens	PARP4	poly(ADP-ribose) polymerase family member 4	GO:0140289 protein mono-ADP-ribosylation;GO:0006471 protein ADP-ribosylation;GO:0051972 regulation of telomerase activity		ENZYME proteins:Transferases; Predicted intracellular proteins; Enzymes	Cytosol (Supported)				0	0	0	0	1	0	0	0	0	0	0	0	0	0	0	0	0	0	0	0
PBX1	5087	symbol	H. sapiens	5087	H. sapiens	PBX1	PBX homeobox 1	GO:0030325 adrenal gland development;GO:0035162 embryonic hemopoiesis;GO:0001779 natural killer cell differentiation		Predicted intracellular proteins; Disease related genes; Cancer-related genes; Transcription factors:Helix-turn-helix domains	Nucleoplasm (Enhanced); Additional: Cytosol;Nuclear bodies		(M115)PID REG GR PATHWAY		0	0	0	0	1	1	0	0	0	0	0	0	0	0	0	0	0	0	0	0
PBX3	5090	symbol	H. sapiens	5090	H. sapiens	PBX3	PBX homeobox 3	GO:0007387 anterior compartment pattern formation;GO:0007388 posterior compartment specification;GO:0007386 compartment pattern specification		Predicted intracellular proteins; Transcription factors:Helix-turn-helix domains	Nucleoplasm (Approved); Additional: Cytosol;Nuclear bodies				0	0	0	0	0	0	0	0	0	0	0	0	0	0	0	0	0	0	0	0
PCNP	57092	symbol	H. sapiens	57092	H. sapiens	PCNP	PEST proteolytic signal containing nuclear protein	GO:0043161 proteasome-mediated ubiquitin-dependent protein catabolic process;GO:0010498 proteasomal protein catabolic process;GO:0006511 ubiquitin-dependent protein catabolic process		Predicted intracellular proteins	Nucleoplasm (Enhanced); Additional: Nuclear bodies				0	0	0	0	0	0	0	0	0	0	0	0	0	0	0	0	0	0	0	0
PCNXL4	64430	gene_synonym	H. sapiens	64430	H. sapiens	PCNX4	pecanex 4			Predicted intracellular proteins	Cytosol (Approved)				0	0	0	0	0	0	0	0	0	0	0	0	0	0	0	0	0	0	0	0
PDK4	5166	symbol	H. sapiens	5166	H. sapiens	PDK4	pyruvate dehydrogenase kinase 4	GO:0010510 regulation of acetyl-CoA biosynthetic process from pyruvate;GO:0050812 regulation of acyl-CoA biosynthetic process;GO:0006086 acetyl-CoA biosynthetic process from pyruvate	Atypical: PDK/BCKDK protein kinase family	ENZYME proteins:Transferases; Predicted intracellular proteins; Enzymes; Kinases:Atypical kinases		Tretinoin; 4-[4-(4-methoxyphenyl)-5-methyl-1H-pyrazol-3-yl]benzene-1,3-diol		(M5934)HALLMARK XENOBIOTIC METABOLISM; (M5936)HALLMARK OXIDATIVE PHOSPHORYLATION	1	0	0	0	0	1	0	0	0	0	0	0	0	1	0	0	0	0	1	0
PDPN	10630	symbol	H. sapiens	10630	H. sapiens	PDPN	podoplanin	GO:1904328 regulation of myofibroblast contraction;GO:1990764 myofibroblast contraction;GO:0060838 lymphatic endothelial cell fate commitment			Plasma membrane (Supported); Additional: Cell Junctions;Mitochondria			(M5932)HALLMARK INFLAMMATORY RESPONSE	0	1	0	1	0	0	1	0	0	1	0	0	1	0	1	0	0	0	0	0
PGR	5241	symbol	H. sapiens	5241	H. sapiens	PGR	progesterone receptor	GO:0060748 tertiary branching involved in mammary gland duct morphogenesis;GO:0001542 ovulation from ovarian follicle;GO:0060745 mammary gland branching involved in pregnancy		Cancer-related genes:Candidate cancer biomarkers; Transcription factors:Zinc-coordinating DNA-binding domains; Predicted intracellular proteins; FDA approved drug targets:Small molecule drugs; Nuclear receptors		Etonogestrel; Desogestrel; Megestrol acetate; Levonorgestrel; Dydrogesterone; Progesterone; Spironolactone; Lindane; Fluticasone propionate; Medroxyprogesterone acetate; Mitotane; Norethisterone; Mometasone; Ethynodiol diacetate; Mifepristone; Norgestimate; Drospirenone; Danazol; Oxybenzone; Allylestrenol; Phthalic Acid; Metribolone; Tanaproget; Telapristone acetate; Asoprisnil; Norelgestromin; G…	(M267)PID ANTHRAX PATHWAY; (M200)PID ERA GENOMIC PATHWAY	(M5906)HALLMARK ESTROGEN RESPONSE EARLY; (M5907)HALLMARK ESTROGEN RESPONSE LATE	0	0	0	0	1	0	0	0	0	0	0	1	0	1	0	0	0	0	0	0
PHACTR1	221692	symbol	H. sapiens	221692	H. sapiens	PHACTR1	phosphatase and actin regulator 1	GO:0140059 dendrite arborization;GO:0140058 neuron projection arborization;GO:2001222 regulation of neuron migration		Predicted intracellular proteins	Plasma membrane (Uncertain)				0	0	0	0	0	0	1	0	0	0	0	0	1	0	0	0	0	0	0	0
PHACTR3	116154	symbol	H. sapiens	116154	H. sapiens	PHACTR3	phosphatase and actin regulator 3	GO:0030036 actin cytoskeleton organization;GO:0043086 negative regulation of catalytic activity;GO:0030029 actin filament-based process		Predicted intracellular proteins	Nucleoplasm (Enhanced)				0	0	0	0	0	0	0	0	0	0	0	0	1	0	0	0	0	0	0	0
PIK3IP1	113791	symbol	H. sapiens	113791	H. sapiens	PIK3IP1	phosphoinositide-3-kinase interacting protein 1	GO:0043553 negative regulation of phosphatidylinositol 3-kinase activity;GO:0090219 negative regulation of lipid kinase activity;GO:0014067 negative regulation of phosphatidylinositol 3-kinase signaling		Predicted intracellular proteins			(M5883)NABA SECRETED FACTORS; (M5885)NABA MATRISOME ASSOCIATED; (M5889)NABA MATRISOME		0	0	0	0	0	0	0	0	0	0	0	0	0	0	0	0	0	0	0	0
PIK3R1	5295	symbol	H. sapiens	5295	H. sapiens	PIK3R1	phosphoinositide-3-kinase regulatory subunit 1	GO:0120180 cell-substrate junction disassembly;GO:0120181 focal adhesion disassembly;GO:0120182 regulation of focal adhesion disassembly		Cancer-related genes:Candidate cancer biomarkers; RAS pathway related proteins; Cancer-related genes:Mutated cancer genes; Predicted intracellular proteins; Disease related genes; Cancer-related genes:Mutational cancer driver genes	Cytosol (Supported)	Isoprenaline; SF1126; Enzastaurin; Wortmannin	(M135)PID IL5 PATHWAY; (M26)PID NFKAPPAB ATYPICAL PATHWAY; (M273)PID EPHA2 FWD PATHWAY		1	1	1	1	1	1	1	1	1	1	0	1	1	1	1	0	0	0	0	0
PITPNA	5306	symbol	H. sapiens	5306	H. sapiens	PITPNA	phosphatidylinositol transfer protein alpha	GO:0120009 intermembrane lipid transfer;GO:0015914 phospholipid transport;GO:0015748 organophosphate ester transport		Predicted intracellular proteins	Cytosol (Approved); Additional: Vesicles	1,2-diacyl-sn-glycero-3-phosphoinositol; (Z,Z)-4-Hydroxy-N,N,N-Trimethyl-10-Oxo-7-[(1-Oxo-9-Octadecenyl)Oxy]-3,5,9-Trioxa-4-Phosphaheptacos-18-En-1-Aminium-4-Oxide	(M108)PID NETRIN PATHWAY		1	0	0	0	1	0	0	1	0	0	0	0	0	0	0	0	1	0	0	0
PIWIL4	143689	symbol	H. sapiens	143689	H. sapiens	PIWIL4	piwi like RNA-mediated gene silencing 4	GO:0034587 piRNA metabolic process;GO:0043046 DNA methylation involved in gamete generation;GO:0010528 regulation of transposition		Predicted intracellular proteins	Mitochondria;Nucleoplasm (Approved)				0	0	0	0	0	0	0	0	0	0	0	0	0	0	0	0	0	0	0	0
PLA2G4C	8605	symbol	H. sapiens	8605	H. sapiens	PLA2G4C	phospholipase A2 group IVC	GO:0006663 platelet activating factor biosynthetic process;GO:0046469 platelet activating factor metabolic process;GO:0036152 phosphatidylethanolamine acyl-chain remodeling		Predicted intracellular proteins; ENZYME proteins:Hydrolases; Enzymes; RAS pathway related proteins	Cytosol (Approved)				0	0	0	1	1	1	0	0	0	0	0	1	0	0	0	0	1	0	0	0
PLA2R1	22925	symbol	H. sapiens	22925	H. sapiens	PLA2R1	phospholipase A2 receptor 1	GO:1900139 negative regulation of arachidonic acid secretion;GO:1903210 glomerular visceral epithelial cell apoptotic process;GO:1904633 regulation of glomerular visceral epithelial cell apoptotic process		Predicted secreted proteins	Cytosol (Approved)				0	0	0	0	1	1	0	0	0	0	0	0	0	0	0	1	1	1	0	0
PLCE1	51196	symbol	H. sapiens	51196	H. sapiens	PLCE1	phospholipase C epsilon 1	GO:0006651 diacylglycerol biosynthetic process;GO:0046339 diacylglycerol metabolic process;GO:0010592 positive regulation of lamellipodium assembly		RAS pathway related proteins; Predicted intracellular proteins; ENZYME proteins:Hydrolases; Enzymes; Disease related genes; Potential drug targets	Cytosol (Supported)		(M269)PID RAS PATHWAY		1	0	1	1	1	1	0	0	0	0	0	1	1	0	0	0	0	0	1	0
PLSCR4	57088	symbol	H. sapiens	57088	H. sapiens	PLSCR4	phospholipid scramblase 4	GO:0017121 plasma membrane phospholipid scrambling;GO:0045332 phospholipid translocation;GO:0034204 lipid translocation		Predicted intracellular proteins; Transporters	Nuclear bodies;Nucleoplasm (Approved)				0	0	0	0	0	0	0	0	0	0	0	0	0	1	0	0	1	0	0	0
PMP22	5376	symbol	H. sapiens	5376	H. sapiens	PMP22	peripheral myelin protein 22	GO:0032060 bleb assembly;GO:0032288 myelin assembly;GO:0007422 peripheral nervous system development		Cancer-related genes:Candidate cancer biomarkers; Predicted intracellular proteins; Disease related genes; Transporters:Transporter channels and pores; Potential drug targets			(M239)PID A6B1 A6B4 INTEGRIN PATHWAY	(M5942)HALLMARK UV RESPONSE DN; (M5930)HALLMARK EPITHELIAL MESENCHYMAL TRANSITION	0	0	1	1	0	0	0	0	0	0	0	0	1	0	0	0	0	0	0	0
PNPLA8	50640	symbol	H. sapiens	50640	H. sapiens	PNPLA8	patatin like phospholipase domain containing 8	GO:0046338 phosphatidylethanolamine catabolic process;GO:0034638 phosphatidylcholine catabolic process;GO:0032048 cardiolipin metabolic process		Predicted intracellular proteins; ENZYME proteins:Hydrolases; Enzymes; Disease related genes; Potential drug targets	Cytosol;Nucleoplasm (Approved); Additional: Golgi apparatus			(M5948)HALLMARK BILE ACID METABOLISM	0	0	0	0	0	1	0	0	0	0	0	0	0	0	0	0	1	0	0	0
PPAP2A	8611	gene_synonym	H. sapiens	8611	H. sapiens	PLPP1	phospholipid phosphatase 1	GO:0006670 sphingosine metabolic process;GO:0046519 sphingoid metabolic process;GO:0007205 protein kinase C-activating G protein-coupled receptor signaling pathway		ENZYME proteins:Hydrolases; Enzymes	Plasma membrane (Supported)		(M7)PID FCER1 PATHWAY; (M19)PID P73PATHWAY	(M5908)HALLMARK ANDROGEN RESPONSE; (M5947)HALLMARK IL2 STAT5 SIGNALING	0	0	0	1	1	1	0	0	0	0	0	0	0	1	0	0	0	0	0	0
PPP1R21	129285	symbol	H. sapiens	129285	H. sapiens	PPP1R21	protein phosphatase 1 regulatory subunit 21			Predicted intracellular proteins	Vesicles (Approved); Additional: Nucleoplasm				0	0	0	0	0	0	0	0	0	0	0	0	0	0	0	0	0	0	0	0
PQLC2L	152078	gene_synonym	H. sapiens	152078	H. sapiens	SLC66A1L	solute carrier family 66 member 1 like	GO:1902022 L-lysine transport;GO:1903401 L-lysine transmembrane transport;GO:1903826 arginine transmembrane transport		Predicted intracellular proteins	Nuclear bodies;Nucleoplasm (Approved)				0	0	0	0	0	0	0	0	0	0	0	0	0	0	0	0	0	0	0	0
PRIMA1	145270	symbol	H. sapiens	145270	H. sapiens	PRIMA1	proline rich membrane anchor 1	GO:0042135 neurotransmitter catabolic process;GO:0042133 neurotransmitter metabolic process;GO:0001505 regulation of neurotransmitter levels			Plasma membrane (Approved); Additional: Cytosol;Nucleoli				0	0	0	0	0	0	0	0	0	0	0	0	0	0	0	0	0	1	0	0
PRKD3	23683	symbol	H. sapiens	23683	H. sapiens	PRKD3	protein kinase D3	GO:0089700 protein kinase D signaling;GO:0007205 protein kinase C-activating G protein-coupled receptor signaling pathway;GO:0030148 sphingolipid biosynthetic process	CAMK Ser/Thr protein kinase family	ENZYME proteins:Transferases; Kinases:CAMK Ser/Thr protein kinases; Enzymes; Predicted intracellular proteins	Cytosol;Nucleoplasm (Approved)				0	0	0	0	0	1	0	0	0	0	0	1	0	0	0	0	0	0	0	0
PRKG2	5593	symbol	H. sapiens	5593	H. sapiens	PRKG2	protein kinase cGMP-dependent 2	GO:2001226 negative regulation of chloride transport;GO:0036289 peptidyl-serine autophosphorylation;GO:0046146 tetrahydrobiopterin metabolic process	AGC Ser/Thr protein kinase family	ENZYME proteins:Transferases; Predicted intracellular proteins; Kinases:AGC Ser/Thr protein kinases; Enzymes		Fostamatinib		(M5953)HALLMARK KRAS SIGNALING UP	0	0	0	0	0	0	0	0	1	1	0	1	0	0	0	0	0	1	0	0
PRLR	5618	symbol	H. sapiens	5618	H. sapiens	PRLR	prolactin receptor	GO:0038161 prolactin signaling pathway;GO:0038165 oncostatin-M-mediated signaling pathway;GO:0048861 leukemia inhibitory factor signaling pathway		Predicted intracellular proteins; FDA approved drug targets:Small molecule drugs; Disease related genes; FDA approved drug targets:Biotech drugs		Somatotropin	(M13)PID ERBB4 PATHWAY; (M50)PID PTP1B PATHWAY	(M5907)HALLMARK ESTROGEN RESPONSE LATE	1	0	0	0	1	1	0	1	0	1	0	0	0	1	0	0	0	0	0	0
PRTFDC1	56952	symbol	H. sapiens	56952	H. sapiens	PRTFDC1	phosphoribosyl transferase domain containing 1	GO:0006178 guanine salvage;GO:0046099 guanine biosynthetic process;GO:0043096 purine nucleobase salvage		Predicted intracellular proteins	Nucleoplasm (Approved); Additional: Cytosol;Golgi apparatus				0	0	0	0	0	0	0	0	0	0	0	0	0	0	0	0	0	0	0	0
PSG5	5673	symbol	H. sapiens	5673	H. sapiens	PSG5	pregnancy specific beta-1-glycoprotein 5	GO:0007565 female pregnancy;GO:0044706 multi-multicellular organism process;GO:0044703 multi-organism reproductive process		Predicted secreted proteins		Alitretinoin			0	0	0	0	0	0	0	0	0	1	0	0	0	0	0	0	0	0	0	0
PSTPIP1	9051	symbol	H. sapiens	9051	H. sapiens	PSTPIP1	proline-serine-threonine phosphatase interacting protein 1	GO:0030041 actin filament polymerization;GO:0008154 actin polymerization or depolymerization;GO:0051258 protein polymerization		Predicted intracellular proteins; Disease related genes					1	0	0	0	1	0	0	0	0	0	0	0	1	0	0	1	0	0	0	0
PTGIS	5740	symbol	H. sapiens	5740	H. sapiens	PTGIS	prostaglandin I2 synthase	GO:1900119 positive regulation of execution phase of apoptosis;GO:0035360 positive regulation of peroxisome proliferator activated receptor signaling pathway;GO:0019371 cyclooxygenase pathway		FDA approved drug targets:Small molecule drugs; ENZYME proteins:Isomerase; Enzymes; Disease related genes	Endoplasmic reticulum (Approved)	Phenylbutazone; Epoprostenol; (5Z)-7-{(1R,4S,5R,6R)-6-[(1E)-1-Octen-1-yl]-2,3-diazabicyclo[2.2.1]hept-2-en-5-yl}-5-heptenoic acid		(M5909)HALLMARK MYOGENESIS	0	0	0	0	0	1	0	0	0	0	0	0	0	0	0	0	0	0	0	0
PVRL3	25945	gene_synonym	H. sapiens	25945	H. sapiens	NECTIN3	nectin cell adhesion molecule 3	GO:0002089 lens morphogenesis in camera-type eye;GO:0007157 heterophilic cell-cell adhesion via plasma membrane cell adhesion molecules;GO:0060042 retina morphogenesis in camera-type eye		Predicted intracellular proteins; CD markers	Cytosol (Approved); Additional: Cell Junctions		(M72)PID NECTIN PATHWAY	(M5915)HALLMARK APICAL JUNCTION	0	0	0	0	0	0	0	0	1	0	0	0	0	0	0	0	0	0	0	0
PXMP4	11264	symbol	H. sapiens	11264	H. sapiens	PXMP4	peroxisomal membrane protein 4	GO:0008150 biological_process		Transporters:Transporter channels and pores; Predicted intracellular proteins	Peroxisomes (Approved); Additional: Nucleoli fibrillar center				0	0	0	0	0	0	0	0	0	0	0	0	0	0	0	0	0	0	0	0
PXYLP1	92370	symbol	H. sapiens	92370	H. sapiens	PXYLP1	2-phosphoxylose phosphatase 1	GO:0010908 regulation of heparan sulfate proteoglycan biosynthetic process;GO:0010909 positive regulation of heparan sulfate proteoglycan biosynthetic process;GO:1902730 positive regulation of proteoglycan biosynthetic process		Predicted intracellular proteins					0	0	0	0	0	0	0	0	0	0	0	0	0	0	0	0	0	0	0	0
QPCT	25797	symbol	H. sapiens	25797	H. sapiens	QPCT	glutaminyl-peptide cyclotransferase	GO:0017186 peptidyl-pyroglutamic acid biosynthetic process, using glutaminyl-peptide cyclotransferase;GO:0018199 peptidyl-glutamine modification;GO:0018193 peptidyl-amino acid modification		ENZYME proteins:Transferases; Predicted intracellular proteins; Predicted secreted proteins; Enzymes	Cytosol (Approved)	1-benzylimidazole; N-acetylhistamine; Glutamine t-butyl ester			0	0	0	0	0	0	0	0	0	0	0	0	0	0	0	0	0	0	0	0
RAB14	51552	symbol	H. sapiens	51552	H. sapiens	RAB14	RAB14, member RAS oncogene family	GO:0090386 phagosome maturation involved in apoptotic cell clearance;GO:0090387 phagolysosome assembly involved in apoptotic cell clearance;GO:0001845 phagolysosome assembly		Predicted intracellular proteins	Vesicles (Supported)			(M5910)HALLMARK PROTEIN SECRETION	1	0	0	0	0	1	0	0	1	0	0	0	0	0	0	0	0	0	0	0
RABGEF1	27342	symbol	H. sapiens	27342	H. sapiens	RABGEF1	RAB guanine nucleotide exchange factor 1	GO:0006612 protein targeting to membrane;GO:0090150 establishment of protein localization to membrane;GO:0006605 protein targeting		Transporters:Transporter channels and pores; Predicted intracellular proteins	Cytosol (Supported); Additional: Nucleoli		(M269)PID RAS PATHWAY		0	0	0	0	0	0	0	0	1	0	0	0	0	0	0	1	0	0	0	0
RAC1	5879	symbol	H. sapiens	5879	H. sapiens	RAC1	Rac family small GTPase 1	GO:0032707 negative regulation of interleukin-23 production;GO:0010764 negative regulation of fibroblast migration;GO:0032627 interleukin-23 production		Cancer-related genes:Candidate cancer biomarkers; RAS pathway related proteins; Cancer-related genes:Mutated cancer genes; Predicted intracellular proteins; Cancer-related genes:Mutational cancer driver genes	Cytosol;Nucleoplasm (Approved); Additional: Nucleoli	Azathioprine; Guanosine-5'-Diphosphate	(M120)PID ARF6 DOWNSTREAM PATHWAY; (M243)PID ARF 3PATHWAY; (M273)PID EPHA2 FWD PATHWAY	(M5923)HALLMARK PI3K AKT MTOR SIGNALING; (M5946)HALLMARK COAGULATION	1	0	1	1	1	0	1	0	1	1	0	1	1	0	1	1	0	1	0	0
RAET1E	135250	symbol	H. sapiens	135250	H. sapiens	RAET1E	retinoic acid early transcript 1E	GO:0045954 positive regulation of natural killer cell mediated cytotoxicity;GO:0002717 positive regulation of natural killer cell mediated immunity;GO:0042269 regulation of natural killer cell mediated cytotoxicity		Predicted intracellular proteins	Focal adhesion sites (Supported); Additional: Cytosol				0	0	0	0	0	0	0	0	0	0	0	0	0	0	1	0	0	0	0	0
RAET1G	353091	symbol	H. sapiens	353091	H. sapiens	RAET1G	retinoic acid early transcript 1G	GO:0002729 positive regulation of natural killer cell cytokine production;GO:0002370 natural killer cell cytokine production;GO:0002727 regulation of natural killer cell cytokine production		Predicted secreted proteins	Vesicles (Approved)				0	0	0	0	0	0	0	0	0	0	0	0	0	0	1	0	0	0	0	0
RALA	5898	symbol	H. sapiens	5898	H. sapiens	RALA	RAS like proto-oncogene A	GO:0051665 membrane raft localization;GO:0090141 positive regulation of mitochondrial fission;GO:0051491 positive regulation of filopodium assembly		Predicted intracellular proteins; RAS pathway related proteins	Plasma membrane (Supported); Additional: Focal adhesion sites	Guanosine-5'-Diphosphate	(M76)PID P38 ALPHA BETA PATHWAY; (M67)PID ARF6 TRAFFICKING PATHWAY; (M136)PID FOXO PATHWAY	(M5898)HALLMARK DNA REPAIR	1	0	1	1	1	0	0	1	1	0	0	1	1	0	1	1	0	1	0	0
RAP1A	5906	symbol	H. sapiens	5906	H. sapiens	RAP1A	RAP1A, member of RAS oncogene family	GO:2000301 negative regulation of synaptic vesicle exocytosis;GO:1905451 positive regulation of Fc-gamma receptor signaling pathway involved in phagocytosis;GO:0097327 response to antineoplastic agent		Predicted intracellular proteins; RAS pathway related proteins			(M69)PID REELIN PATHWAY; (M72)PID NECTIN PATHWAY; (M4910)ST ERK1 ERK2 MAPK PATHWAY		1	1	1	1	1	0	1	0	1	1	0	1	0	1	0	1	0	1	0	0
RBM47	54502	symbol	H. sapiens	54502	H. sapiens	RBM47	RNA binding motif protein 47	GO:0016554 cytidine to uridine editing;GO:0016553 base conversion or substitution editing;GO:0002244 hematopoietic progenitor cell differentiation		Predicted intracellular proteins	Cytosol;Nucleoplasm (Approved)				0	0	0	0	0	0	0	0	0	0	0	0	0	0	0	0	0	0	0	0
RECK	8434	symbol	H. sapiens	8434	H. sapiens	RECK	reversion inducing cysteine rich protein with kazal motifs	GO:0090210 regulation of establishment of blood-brain barrier;GO:0001955 blood vessel maturation;GO:0060856 establishment of blood-brain barrier			Plasma membrane (Supported)				0	1	0	0	0	0	0	0	0	0	1	0	0	0	0	0	0	0	0	0
RFX8	731220	symbol	H. sapiens	731220	H. sapiens	RFX8	regulatory factor X8	GO:0006357 regulation of transcription by RNA polymerase II;GO:0006366 transcription by RNA polymerase II;GO:0006355 regulation of transcription, DNA-templated		Predicted intracellular proteins; Transcription factors:Helix-turn-helix domains	Nucleoplasm (Approved); Additional: Nuclear bodies				0	0	0	0	0	0	0	0	0	0	0	0	0	0	0	0	0	0	0	0
RGCC	28984	symbol	H. sapiens	28984	H. sapiens	RGCC	regulator of cell cycle	GO:0001100 negative regulation of exit from mitosis;GO:0003331 positive regulation of extracellular matrix constituent secretion;GO:0090272 negative regulation of fibroblast growth factor production		Predicted intracellular proteins	Nucleoplasm (Supported); Additional: Nucleoli		(M145)PID P53 DOWNSTREAM PATHWAY		0	1	0	0	0	0	1	0	0	0	0	0	1	0	0	0	0	1	0	0
RGN	9104	symbol	H. sapiens	9104	H. sapiens	RGN	regucalcin	GO:1903011 negative regulation of bone development;GO:1903611 negative regulation of calcium-dependent ATPase activity;GO:1903627 regulation of dUTP diphosphatase activity		Predicted intracellular proteins; ENZYME proteins:Hydrolases; Enzymes	Cytosol (Approved)	Calcium citrate; Calcium Phosphate; Calcium phosphate dihydrate		(M5946)HALLMARK COAGULATION	0	0	0	0	0	1	0	0	0	0	0	0	0	0	0	0	0	0	1	0
RHBDL2	54933	symbol	H. sapiens	54933	H. sapiens	RHBDL2	rhomboid like 2	GO:0006508 proteolysis;GO:0019538 protein metabolic process;GO:1901564 organonitrogen compound metabolic process		Peptidases:Serine-type peptidases; ENZYME proteins:Hydrolases; Enzymes					0	0	0	0	0	0	0	0	0	0	0	0	0	0	0	0	0	0	0	0
RHOU	58480	symbol	H. sapiens	58480	H. sapiens	RHOU	ras homolog family member U	GO:0032488 Cdc42 protein signal transduction;GO:1903955 positive regulation of protein targeting to mitochondrion;GO:1903749 positive regulation of establishment of protein localization to mitochondrion		Predicted intracellular proteins			(M5493)WNT SIGNALING		0	0	1	0	0	0	0	1	0	0	0	0	0	0	0	1	0	0	0	0
RMDN1	51115	symbol	H. sapiens	51115	H. sapiens	RMDN1	regulator of microtubule dynamics 1	GO:0051315 attachment of mitotic spindle microtubules to kinetochore;GO:0008608 attachment of spindle microtubules to kinetochore;GO:0007080 mitotic metaphase plate congression		Predicted intracellular proteins	Centrosome (Supported); Additional: Actin filaments				0	0	0	0	0	0	0	0	0	0	0	0	0	0	0	0	0	0	0	0
RNF185	91445	symbol	H. sapiens	91445	H. sapiens	RNF185	ring finger protein 185	GO:0071712 ER-associated misfolded protein catabolic process;GO:1904294 positive regulation of ERAD pathway;GO:1904380 endoplasmic reticulum mannose trimming		ENZYME proteins:Transferases; Predicted intracellular proteins; Enzymes					0	0	0	0	0	0	0	0	0	0	0	0	0	0	0	0	0	0	0	1
RNF19A	25897	symbol	H. sapiens	25897	H. sapiens	RNF19A	ring finger protein 19A, RBR E3 ubiquitin protein ligase	GO:0099576 regulation of protein catabolic process at postsynapse, modulating synaptic transmission;GO:0099170 postsynaptic modulation of chemical synaptic transmission;GO:0032436 positive regulation of proteasomal ubiquitin-dependent protein catabolic process		ENZYME proteins:Transferases; Predicted intracellular proteins; Enzymes				(M5945)HALLMARK HEME METABOLISM	0	0	0	0	0	0	0	0	0	0	0	0	0	0	0	0	0	0	0	0
RPGRIP1L	23322	symbol	H. sapiens	23322	H. sapiens	RPGRIP1L	RPGRIP1 like	GO:0046548 retinal rod cell development;GO:0021670 lateral ventricle development;GO:0060221 retinal rod cell differentiation		Predicted intracellular proteins; Disease related genes	Cytosol;Plasma membrane (Supported)				0	0	1	0	0	0	0	0	0	0	0	0	0	0	0	0	0	0	0	0
RPL31P11	641311	symbol	H. sapiens	641311	H. sapiens	RPL31P11	ribosomal protein L31 pseudogene 11								0	0	0	0	0	0	0	0	0	0	0	0	0	0	0	0	0	0	0	0
RRM2B	50484	symbol	H. sapiens	50484	H. sapiens	RRM2B	ribonucleotide reductase regulatory TP53 inducible subunit M2B	GO:0006264 mitochondrial DNA replication;GO:0009263 deoxyribonucleotide biosynthetic process;GO:0009200 deoxyribonucleoside triphosphate metabolic process		Predicted intracellular proteins; FDA approved drug targets:Small molecule drugs; Enzymes; ENZYME proteins:Oxidoreductases; Disease related genes	Cytosol;Nucleoplasm (Enhanced)	Cladribine	(M145)PID P53 DOWNSTREAM PATHWAY	(M5898)HALLMARK DNA REPAIR	0	0	0	0	0	1	0	0	0	0	0	0	0	0	0	0	0	0	0	0
RSPO3	84870	symbol	H. sapiens	84870	H. sapiens	RSPO3	R-spondin 3	GO:2000096 positive regulation of Wnt signaling pathway, planar cell polarity pathway;GO:0060670 branching involved in labyrinthine layer morphogenesis;GO:2000052 positive regulation of non-canonical Wnt signaling pathway		Predicted secreted proteins; Cancer-related genes			(M3008)NABA ECM GLYCOPROTEINS; (M5884)NABA CORE MATRISOME; (M5889)NABA MATRISOME		0	0	0	0	0	0	0	0	0	0	0	0	0	0	0	0	0	0	0	0
RSRP1	57035	symbol	H. sapiens	57035	H. sapiens	RSRP1	arginine and serine rich protein 1			Predicted intracellular proteins	Nucleoplasm (Approved)				0	0	0	0	0	0	0	0	0	0	0	0	0	0	0	0	0	0	0	0
S1PR1	1901	symbol	H. sapiens	1901	H. sapiens	S1PR1	sphingosine-1-phosphate receptor 1	GO:0003245 cardiac muscle tissue growth involved in heart morphogenesis;GO:0003241 growth involved in heart morphogenesis;GO:0001955 blood vessel maturation		Cancer-related genes:Candidate cancer biomarkers; G-protein coupled receptors:Lysolipids receptors; CD markers; Transporters; FDA approved drug targets:Biotech drugs; G-protein coupled receptors:GPCRs excl olfactory receptors	Vesicles (Supported)	Fingolimod; Asfotase alfa; Siponimod; Ozanimod	(M103)PID S1P S1P1 PATHWAY; (M155)PID S1P META PATHWAY; (M55)PID S1P S1P3 PATHWAY		1	0	1	1	1	0	1	1	0	0	1	0	1	0	1	0	0	0	1	0
SCN1A	6323	symbol	H. sapiens	6323	H. sapiens	SCN1A	sodium voltage-gated channel alpha subunit 1	GO:0050966 detection of mechanical stimulus involved in sensory perception of pain;GO:0062149 detection of stimulus involved in sensory perception of pain;GO:0019228 neuronal action potential		Voltage-gated ion channels:Voltage-Gated Sodium Channels; Predicted intracellular proteins; FDA approved drug targets:Small molecule drugs; Disease related genes; Transporters:Transporter channels and pores	Nucleoplasm;Plasma membrane (Supported); Additional: Nuclear bodies	Ranolazine; Phenytoin; Topiramate; Valproic acid; Lamotrigine; Carbamazepine; Oxcarbazepine; Cocaine; Zonisamide; Promethazine; Phenacemide; Phenazopyridine; Nitrazepam; Permethrin; Tetrodotoxin; Brivaracetam; Tetracaine; Amylocaine; Propoxycaine; Pramocaine; Pentoxyverine; Dichlorobenzyl alcohol; Bioallethrin; Fish oil			0	0	0	0	0	0	0	0	0	0	0	0	1	0	0	0	0	0	0	0
SERPING1	710	symbol	H. sapiens	710	H. sapiens	SERPING1	serpin family G member 1	GO:0001868 regulation of complement activation, lectin pathway;GO:0001869 negative regulation of complement activation, lectin pathway;GO:0001867 complement activation, lectin pathway		Candidate cardiovascular disease genes; Predicted secreted proteins; Disease related genes; Predicted intracellular proteins		PPL-100; Copper	(M3468)NABA ECM REGULATORS; (M5885)NABA MATRISOME ASSOCIATED; (M5889)NABA MATRISOME	(M5946)HALLMARK COAGULATION; (M5913)HALLMARK INTERFERON GAMMA RESPONSE; (M5921)HALLMARK COMPLEMENT	0	0	0	0	1	0	0	0	0	1	0	0	0	0	0	0	0	0	0	0
SFRP2	6423	symbol	H. sapiens	6423	H. sapiens	SFRP2	secreted frizzled related protein 2	GO:0061185 negative regulation of dermatome development;GO:2000040 regulation of planar cell polarity pathway involved in axis elongation;GO:2000041 negative regulation of planar cell polarity pathway involved in axis elongation		Predicted secreted proteins	Intermediate filaments (Approved)		(M5883)NABA SECRETED FACTORS; (M5885)NABA MATRISOME ASSOCIATED; (M5889)NABA MATRISOME		0	1	0	1	1	0	1	0	0	0	0	0	1	0	0	0	0	0	0	0
SGCB	6443	symbol	H. sapiens	6443	H. sapiens	SGCB	sarcoglycan beta	GO:0097084 vascular associated smooth muscle cell development;GO:0035886 vascular associated smooth muscle cell differentiation;GO:0051145 smooth muscle cell differentiation		Disease related genes	Cytosol (Approved)			(M5930)HALLMARK EPITHELIAL MESENCHYMAL TRANSITION	0	0	0	0	0	0	0	0	0	0	0	0	0	0	0	0	0	0	0	0
SGCG	6445	symbol	H. sapiens	6445	H. sapiens	SGCG	sarcoglycan gamma	GO:0048738 cardiac muscle tissue development;GO:0060047 heart contraction;GO:0003015 heart process		Disease related genes				(M5909)HALLMARK MYOGENESIS; (M5930)HALLMARK EPITHELIAL MESENCHYMAL TRANSITION	0	0	0	0	0	0	0	0	0	0	0	0	0	0	0	0	0	0	0	0
SGMS1	259230	symbol	H. sapiens	259230	H. sapiens	SGMS1	sphingomyelin synthase 1	GO:0006686 sphingomyelin biosynthetic process;GO:0006684 sphingomyelin metabolic process;GO:0046513 ceramide biosynthetic process		Predicted intracellular proteins	Nucleoplasm (Approved); Additional: Cytosol;Golgi apparatus;Nucleoli fibrillar center		(M143)PID IL2 PI3K PATHWAY	(M5910)HALLMARK PROTEIN SECRETION	0	0	0	0	1	1	0	0	0	0	0	0	0	1	0	0	0	0	0	0
SH3D19	152503	symbol	H. sapiens	152503	H. sapiens	SH3D19	SH3 domain containing 19	GO:0051044 positive regulation of membrane protein ectodomain proteolysis;GO:0051043 regulation of membrane protein ectodomain proteolysis;GO:0006509 membrane protein ectodomain proteolysis		Predicted intracellular proteins	Cytosol;Nucleoplasm (Supported)				0	0	0	0	0	0	0	0	0	0	0	0	0	0	0	0	0	0	0	0
SH3KBP1	30011	symbol	H. sapiens	30011	H. sapiens	SH3KBP1	SH3 domain containing kinase binding protein 1	GO:0050871 positive regulation of B cell activation;GO:0008360 regulation of cell shape;GO:0050864 regulation of B cell activation		Predicted intracellular proteins	Cytosol (Supported)		(M214)PID ERBB1 INTERNALIZATION PATHWAY; (M48)PID MET PATHWAY		1	0	0	0	1	0	0	0	0	0	0	1	1	0	0	1	0	0	0	0
SHE	126669	symbol	H. sapiens	126669	H. sapiens	SHE	Src homology 2 domain containing E			Predicted intracellular proteins; Predicted secreted proteins				(M5951)HALLMARK SPERMATOGENESIS; (M5947)HALLMARK IL2 STAT5 SIGNALING	0	0	0	0	0	0	0	0	0	0	0	0	0	0	0	0	0	0	0	0
SIAE	54414	symbol	H. sapiens	54414	H. sapiens	SIAE	sialic acid acetylesterase	GO:0005975 carbohydrate metabolic process;GO:0002682 regulation of immune system process;GO:0002376 immune system process		Predicted intracellular proteins; ENZYME proteins:Hydrolases; Enzymes; Disease related genes; Potential drug targets					0	0	0	0	0	0	0	0	0	0	0	0	0	0	0	0	0	0	0	0
SKAP2	8935	symbol	H. sapiens	8935	H. sapiens	SKAP2	src kinase associated phosphoprotein 2	GO:0042113 B cell activation;GO:0046649 lymphocyte activation;GO:0008285 negative regulation of cell population proliferation		Predicted intracellular proteins	Nucleoplasm (Supported); Additional: Cytosol			(M5915)HALLMARK APICAL JUNCTION; (M5924)HALLMARK MTORC1 SIGNALING	0	0	0	0	0	0	0	0	0	0	0	0	0	0	0	0	0	0	0	0
SLC22A15	55356	symbol	H. sapiens	55356	H. sapiens	SLC22A15	solute carrier family 22 member 15	GO:0055085 transmembrane transport;GO:0006811 ion transport;GO:0006810 transport		Transporters:Electrochemical Potential-driven transporters					0	0	0	0	0	0	0	0	0	0	0	0	0	0	0	0	0	0	0	1
SLC25A43	203427	symbol	H. sapiens	203427	H. sapiens	SLC25A43	solute carrier family 25 member 43	GO:0055085 transmembrane transport;GO:0006810 transport;GO:0051234 establishment of localization		Transporters:Electrochemical Potential-driven transporters	Cytosol (Approved)				0	0	0	0	0	0	0	0	0	0	0	0	0	0	0	0	0	0	0	0
SLC2A9	56606	symbol	H. sapiens	56606	H. sapiens	SLC2A9	solute carrier family 2 member 9	GO:0015747 urate transport;GO:0046415 urate metabolic process;GO:1904659 glucose transmembrane transport		Transporters:Electrochemical Potential-driven transporters; Potential drug targets; Disease related genes					0	0	0	0	0	0	0	0	0	0	0	0	0	0	0	0	0	0	0	1
SLC31A2	1318	symbol	H. sapiens	1318	H. sapiens	SLC31A2	solute carrier family 31 member 2	GO:1902311 regulation of copper ion transmembrane transport;GO:0035434 copper ion transmembrane transport;GO:0006825 copper ion transport		Transporters:Transporter channels and pores	Nuclear speckles (Approved); Additional: Intermediate filaments;Plasma membrane			(M5932)HALLMARK INFLAMMATORY RESPONSE	0	0	0	0	0	0	0	0	0	0	0	0	0	0	0	0	0	0	1	0
SLC9A9	285195	symbol	H. sapiens	285195	H. sapiens	SLC9A9	solute carrier family 9 member A9	GO:0098719 sodium ion import across plasma membrane;GO:0051453 regulation of intracellular pH;GO:0030641 regulation of cellular pH		Transporters:Electrochemical Potential-driven transporters; Potential drug targets; Disease related genes					0	0	0	0	0	0	0	0	0	0	0	0	0	0	0	0	0	0	1	1
SLCO3A1	28232	symbol	H. sapiens	28232	H. sapiens	SLCO3A1	solute carrier organic anion transporter family member 3A1	GO:0043252 sodium-independent organic anion transport;GO:0015732 prostaglandin transport;GO:0071715 icosanoid transport		Transporters:Electrochemical Potential-driven transporters					0	0	0	0	0	0	0	0	0	0	0	0	0	0	0	0	1	0	0	1
SMOC1	64093	symbol	H. sapiens	64093	H. sapiens	SMOC1	SPARC related modular calcium binding 1	GO:0045667 regulation of osteoblast differentiation;GO:0048736 appendage development;GO:0060173 limb development		Predicted secreted proteins; Disease related genes	Plasma membrane (Approved)		(M3008)NABA ECM GLYCOPROTEINS; (M5884)NABA CORE MATRISOME; (M5889)NABA MATRISOME		0	1	0	0	0	0	0	0	0	0	0	0	0	0	0	0	0	0	0	0
SMOC2	64094	symbol	H. sapiens	64094	H. sapiens	SMOC2	SPARC related modular calcium binding 2	GO:0035470 positive regulation of vascular wound healing;GO:1900748 positive regulation of vascular endothelial growth factor signaling pathway;GO:0045743 positive regulation of fibroblast growth factor receptor signaling pathway		Predicted intracellular proteins; Predicted secreted proteins; Disease related genes			(M3008)NABA ECM GLYCOPROTEINS; (M5884)NABA CORE MATRISOME; (M5889)NABA MATRISOME		1	1	0	0	0	0	0	0	0	1	0	0	0	0	1	0	0	0	0	0
SNX16	64089	symbol	H. sapiens	64089	H. sapiens	SNX16	sorting nexin 16	GO:0006622 protein targeting to lysosome;GO:0006623 protein targeting to vacuole;GO:0045022 early endosome to late endosome transport		Predicted intracellular proteins	Vesicles (Supported)				0	0	0	0	0	0	0	0	0	0	0	0	0	0	0	0	0	0	0	0
SNX24	28966	symbol	H. sapiens	28966	H. sapiens	SNX24	sorting nexin 24	GO:0015031 protein transport;GO:0045184 establishment of protein localization;GO:0071705 nitrogen compound transport		Predicted intracellular proteins	Vesicles (Approved)			(M5906)HALLMARK ESTROGEN RESPONSE EARLY	0	0	0	0	0	0	0	0	0	0	0	0	0	0	0	0	0	0	0	0
SNX3	8724	symbol	H. sapiens	8724	H. sapiens	SNX3	sorting nexin 3	GO:2000642 negative regulation of early endosome to late endosome transport;GO:1903650 negative regulation of cytoplasmic transport;GO:0070676 intralumenal vesicle formation		Predicted intracellular proteins; Disease related genes		S,S-(2-Hydroxyethyl)Thiocysteine			0	0	0	1	0	0	0	0	1	0	0	0	0	0	0	1	0	1	0	0
SOAT1	6646	symbol	H. sapiens	6646	H. sapiens	SOAT1	sterol O-acyltransferase 1	GO:0042986 positive regulation of amyloid precursor protein biosynthetic process;GO:0034379 very-low-density lipoprotein particle assembly;GO:0034433 steroid esterification		ENZYME proteins:Transferases; FDA approved drug targets:Small molecule drugs; Enzymes	Endoplasmic reticulum (Enhanced)	Ezetimibe; Hesperetin	(M5248)ST JAK STAT PATHWAY		0	0	0	0	0	0	0	0	0	0	0	0	0	0	0	0	1	0	0	1
SPATA18	132671	symbol	H. sapiens	132671	H. sapiens	SPATA18	spermatogenesis associated 18	GO:0035695 mitophagy by induced vacuole formation;GO:0035694 mitochondrial protein catabolic process;GO:0000422 autophagy of mitochondrion		Predicted intracellular proteins	Mitochondria (Supported)		(M256)PID TAP63 PATHWAY		0	1	0	0	0	0	0	0	0	0	0	0	0	0	0	0	0	0	0	0
SPTLC1	10558	symbol	H. sapiens	10558	H. sapiens	SPTLC1	serine palmitoyltransferase long chain base subunit 1	GO:1904606 fat cell apoptotic process;GO:1904649 regulation of fat cell apoptotic process;GO:1904502 regulation of lipophagy		ENZYME proteins:Transferases; Potential drug targets; Enzymes; Disease related genes	Endoplasmic reticulum (Supported)	Pyridoxal phosphate; Serine			0	0	0	0	1	1	0	0	0	0	0	0	0	0	0	0	0	0	0	0
SRPX	8406	symbol	H. sapiens	8406	H. sapiens	SRPX	sushi repeat containing protein X-linked	GO:0060244 negative regulation of cell proliferation involved in contact inhibition;GO:0060242 contact inhibition;GO:0060245 detection of cell density		Predicted secreted proteins			(M3008)NABA ECM GLYCOPROTEINS; (M5884)NABA CORE MATRISOME; (M5889)NABA MATRISOME	(M5916)HALLMARK APICAL SURFACE; (M5891)HALLMARK HYPOXIA	0	0	0	0	0	0	0	0	0	0	0	0	0	0	0	0	0	0	0	0
STARD5	80765	symbol	H. sapiens	80765	H. sapiens	STARD5	StAR related lipid transfer domain containing 5	GO:0035376 sterol import;GO:0070508 cholesterol import;GO:0120009 intermembrane lipid transfer		Predicted intracellular proteins	Vesicles (Approved); Additional: Cytosol				0	0	0	0	0	1	0	0	0	0	0	0	0	0	0	0	1	0	0	0
STAT6	6778	symbol	H. sapiens	6778	H. sapiens	STAT6	signal transducer and activator of transcription 6	GO:0002296 T-helper 1 cell lineage commitment;GO:0048295 positive regulation of isotype switching to IgE isotypes;GO:0048289 isotype switching to IgE isotypes		Predicted intracellular proteins; Transcription factors:Immunoglobulin fold; Cancer-related genes	Cytosol (Supported); Additional: Nucleoplasm		(M9378)ST INTERLEUKIN 4 PATHWAY; (M1718)SIG IL4RECEPTOR IN B LYPHOCYTES; (M91)PID TCPTP PATHWAY		1	0	0	0	1	0	0	1	0	0	0	1	0	1	0	0	0	0	0	0
STAU1	6780	symbol	H. sapiens	6780	H. sapiens	STAU1	staufen double-stranded RNA binding protein 1	GO:0046726 positive regulation by virus of viral protein levels in host cell;GO:0046719 regulation by virus of viral protein levels in host cell;GO:0099010 modification of postsynaptic structure		Predicted intracellular proteins	Cytosol (Enhanced)			(M5893)HALLMARK MITOTIC SPINDLE	0	0	0	0	0	0	1	0	0	0	0	0	0	0	0	0	0	0	0	0
STEAP1	26872	symbol	H. sapiens	26872	H. sapiens	STEAP1	STEAP family member 1	GO:0055072 iron ion homeostasis;GO:0055076 transition metal ion homeostasis;GO:0055065 metal ion homeostasis		Cancer-related genes:Candidate cancer biomarkers; Transporters:Transport Electron Carriers					0	0	0	0	0	0	0	0	0	0	0	0	0	0	0	0	0	0	1	0
STEAP2	261729	symbol	H. sapiens	261729	H. sapiens	STEAP2	STEAP2 metalloreductase	GO:0015679 plasma membrane copper ion transport;GO:0098705 copper ion import across plasma membrane;GO:0015677 copper ion import		Predicted intracellular proteins; Transporters:Transport Electron Carriers	Vesicles (Supported)				0	0	0	0	0	0	0	0	1	0	0	0	0	0	0	1	0	1	1	1
STK38	11329	symbol	H. sapiens	11329	H. sapiens	STK38	serine/threonine kinase 38	GO:0043407 negative regulation of MAP kinase activity;GO:0071901 negative regulation of protein serine/threonine kinase activity;GO:0043409 negative regulation of MAPK cascade	AGC Ser/Thr protein kinase family	ENZYME proteins:Transferases; Predicted intracellular proteins; Kinases:AGC Ser/Thr protein kinases; Enzymes	Cytosol (Approved)	Fostamatinib			0	0	0	0	0	0	0	0	0	0	0	0	0	0	0	0	0	0	0	0
STMN2	11075	symbol	H. sapiens	11075	H. sapiens	STMN2	stathmin 2	GO:0031117 positive regulation of microtubule depolymerization;GO:0031115 negative regulation of microtubule polymerization;GO:1901881 positive regulation of protein depolymerization		Predicted intracellular proteins	Vesicles (Approved); Additional: Endoplasmic reticulum				0	1	0	1	0	0	0	0	0	0	0	0	1	0	0	0	0	0	0	0
STRN	6801	symbol	H. sapiens	6801	H. sapiens	STRN	striatin	GO:0070830 bicellular tight junction assembly;GO:0120192 tight junction assembly;GO:0043297 apical junction assembly		Predicted intracellular proteins; Cancer-related genes	Cytosol (Approved); Additional: Nucleoplasm		(M41)PID ER NONGENOMIC PATHWAY	(M5953)HALLMARK KRAS SIGNALING UP	0	0	0	0	1	0	1	0	0	0	0	0	0	0	0	0	0	0	0	0
STX18	53407	symbol	H. sapiens	53407	H. sapiens	STX18	syntaxin 18	GO:1902953 positive regulation of ER to Golgi vesicle-mediated transport;GO:0090158 endoplasmic reticulum membrane organization;GO:0060628 regulation of ER to Golgi vesicle-mediated transport		Predicted intracellular proteins	Plasma membrane (Approved)				0	0	0	0	0	0	0	0	0	0	0	0	1	0	0	1	0	0	0	0
STX7	8417	symbol	H. sapiens	8417	H. sapiens	STX7	syntaxin 7	GO:1902685 positive regulation of receptor localization to synapse;GO:1902683 regulation of receptor localization to synapse;GO:0001916 positive regulation of T cell mediated cytotoxicity		Predicted intracellular proteins	Lysosomes (Supported)			(M5910)HALLMARK PROTEIN SECRETION	0	0	0	0	0	0	0	0	1	0	0	0	0	0	0	0	0	0	0	0
SVEP1	79987	symbol	H. sapiens	79987	H. sapiens	SVEP1	sushi, von Willebrand factor type A, EGF and pentraxin domain containing 1	GO:0003017 lymph circulation;GO:0048014 Tie signaling pathway;GO:0036303 lymph vessel morphogenesis		Predicted intracellular proteins			(M3008)NABA ECM GLYCOPROTEINS; (M5884)NABA CORE MATRISOME; (M5889)NABA MATRISOME		1	0	0	0	0	0	1	0	0	0	0	0	0	0	0	0	0	0	0	0
SYNJ1	8867	symbol	H. sapiens	8867	H. sapiens	SYNJ1	synaptojanin 1	GO:1904980 positive regulation of endosome organization;GO:1904978 regulation of endosome organization;GO:0016191 synaptic vesicle uncoating		Predicted intracellular proteins; ENZYME proteins:Hydrolases; Enzymes; Disease related genes; Potential drug targets	Cytosol;Nucleoplasm (Approved); Additional: Centrosome		(M62)PID EPHB FWD PATHWAY; (M214)PID ERBB1 INTERNALIZATION PATHWAY	(M5945)HALLMARK HEME METABOLISM	1	1	0	0	1	1	0	0	0	0	0	0	1	0	0	1	0	1	0	0
SYPL1	6856	symbol	H. sapiens	6856	H. sapiens	SYPL1	synaptophysin like 1	GO:0007268 chemical synaptic transmission;GO:0098916 anterograde trans-synaptic signaling;GO:0099537 trans-synaptic signaling							0	0	0	0	0	0	0	0	0	0	0	0	0	0	0	0	0	0	0	0
TAB3	257397	symbol	H. sapiens	257397	H. sapiens	TAB3	TGF-beta activated kinase 1 (MAP3K7) binding protein 3	GO:0010507 negative regulation of autophagy;GO:0043123 positive regulation of I-kappaB kinase/NF-kappaB signaling;GO:0043122 regulation of I-kappaB kinase/NF-kappaB signaling		Predicted intracellular proteins	Cytosol;Nuclear speckles (Approved)				0	0	0	0	1	0	0	1	0	0	0	0	0	0	0	0	0	0	0	0
TANK	10010	symbol	H. sapiens	10010	H. sapiens	TANK	TRAF family member associated NFKB activator	GO:2000158 positive regulation of ubiquitin-specific protease activity;GO:2000152 regulation of ubiquitin-specific protease activity;GO:1903003 positive regulation of protein deubiquitination		Predicted intracellular proteins	Cytosol (Supported); Additional: Nucleoli			(M5890)HALLMARK TNFA SIGNALING VIA NFKB; (M5905)HALLMARK ADIPOGENESIS	0	0	0	0	1	0	0	0	0	0	0	0	0	0	0	0	0	0	0	0
TBX19	9095	symbol	H. sapiens	9095	H. sapiens	TBX19	T-box transcription factor 19	GO:0021983 pituitary gland development;GO:0001756 somitogenesis;GO:0001707 mesoderm formation		Predicted intracellular proteins; Transcription factors:Immunoglobulin fold; Disease related genes	Nuclear speckles (Approved)				0	0	0	0	0	0	0	0	0	0	0	0	0	0	0	0	0	0	0	0
TC2N	123036	symbol	H. sapiens	123036	H. sapiens	TC2N	tandem C2 domains, nuclear			Predicted intracellular proteins	Nuclear bodies;Nucleoplasm (Approved)				0	0	0	0	0	0	0	0	0	0	0	0	0	0	0	0	0	0	0	0
TDRD10	126668	symbol	H. sapiens	126668	H. sapiens	TDRD10	tudor domain containing 10			Cancer-related genes:Mutated cancer genes; Predicted intracellular proteins	Vesicles (Approved)				0	0	0	0	0	0	0	0	0	0	0	0	0	0	0	0	0	0	0	0
TDRD6	221400	symbol	H. sapiens	221400	H. sapiens	TDRD6	tudor domain containing 6	GO:0007283 spermatogenesis;GO:0048232 male gamete generation;GO:0007276 gamete generation		Cancer-related genes:Candidate cancer biomarkers; Predicted intracellular proteins	Cytokinetic bridge;Microtubules;Mitotic spindle (Approved); Additional: Vesicles				0	0	0	0	0	0	0	0	0	0	0	0	0	0	0	0	0	0	0	0
TDRD7	23424	symbol	H. sapiens	23424	H. sapiens	TDRD7	tudor domain containing 7	GO:0002089 lens morphogenesis in camera-type eye;GO:0070306 lens fiber cell differentiation;GO:0002088 lens development in camera-type eye		Predicted intracellular proteins; Disease related genes	Cytoplasmic bodies (Supported); Additional: Nucleoplasm		(M242)PID AURORA A PATHWAY	(M5911)HALLMARK INTERFERON ALPHA RESPONSE; (M5913)HALLMARK INTERFERON GAMMA RESPONSE	0	0	0	0	0	0	0	0	0	0	0	0	0	0	0	0	0	0	0	0
TEX40	25858	gene_synonym	H. sapiens	25858	H. sapiens	CATSPERZ	catsper channel auxiliary subunit zeta	GO:0048240 sperm capacitation;GO:0007140 male meiotic nuclear division;GO:0030317 flagellated sperm motility		Predicted intracellular proteins	Nucleoplasm (Approved)				0	0	0	0	0	0	0	0	0	0	0	0	0	0	0	0	0	0	0	0
TMBIM4	51643	symbol	H. sapiens	51643	H. sapiens	TMBIM4	transmembrane BAX inhibitor motif containing 4	GO:0050848 regulation of calcium-mediated signaling;GO:0019722 calcium-mediated signaling;GO:0019932 second-messenger-mediated signaling		Transporters:Transporter channels and pores; Predicted intracellular proteins	Golgi apparatus (Supported)				0	0	0	0	0	0	0	0	0	0	0	0	0	0	0	0	0	0	0	0
TMBIM6	7009	symbol	H. sapiens	7009	H. sapiens	TMBIM6	transmembrane BAX inhibitor motif containing 6	GO:0060701 negative regulation of ribonuclease activity;GO:0060702 negative regulation of endoribonuclease activity;GO:0060699 regulation of endoribonuclease activity		Transporters:Transporter channels and pores; Predicted intracellular proteins				(M5941)HALLMARK UV RESPONSE UP; (M5934)HALLMARK XENOBIOTIC METABOLISM	0	0	0	0	0	0	0	0	0	0	0	0	0	0	0	0	0	1	1	0
TMEM140	55281	symbol	H. sapiens	55281	H. sapiens	TMEM140	transmembrane protein 140							(M5911)HALLMARK INTERFERON ALPHA RESPONSE	0	0	0	0	0	0	0	0	0	0	0	0	0	0	0	0	0	0	0	0
TMEM167B	56900	symbol	H. sapiens	56900	H. sapiens	TMEM167B	transmembrane protein 167B	GO:0045054 constitutive secretory pathway;GO:0006887 exocytosis;GO:0032940 secretion by cell							0	0	0	0	0	0	0	0	0	0	0	0	0	0	0	0	0	1	0	0
TMEM30B	161291	symbol	H. sapiens	161291	H. sapiens	TMEM30B	transmembrane protein 30B	GO:0140331 aminophospholipid translocation;GO:0015917 aminophospholipid transport;GO:0070863 positive regulation of protein exit from endoplasmic reticulum		Transporters:Accessory Factors Involved in Transport					0	0	0	0	0	0	0	0	0	0	0	0	0	0	0	0	1	0	0	0
TMEM50A	23585	symbol	H. sapiens	23585	H. sapiens	TMEM50A	transmembrane protein 50A	GO:0032511 late endosome to vacuole transport via multivesicular body sorting pathway;GO:0045324 late endosome to vacuole transport;GO:0032509 endosome transport via multivesicular body sorting pathway		Transporters	Plasma membrane (Approved); Additional: Actin filaments;Cytosol			(M5908)HALLMARK ANDROGEN RESPONSE	0	0	0	0	0	0	0	0	0	0	0	0	0	0	0	0	0	0	0	0
TMOD2	29767	symbol	H. sapiens	29767	H. sapiens	TMOD2	tropomodulin 2	GO:0007270 neuron-neuron synaptic transmission;GO:0051694 pointed-end actin filament capping;GO:0045745 positive regulation of G protein-coupled receptor signaling pathway		Predicted intracellular proteins	Nucleoli fibrillar center (Approved); Additional: Nucleoplasm				0	1	0	0	0	0	1	0	0	0	0	0	1	0	0	0	0	0	0	0
TNFAIP2	7127	symbol	H. sapiens	7127	H. sapiens	TNFAIP2	TNF alpha induced protein 2	GO:0051601 exocyst localization;GO:0034629 cellular protein-containing complex localization;GO:0031503 protein-containing complex localization		Cancer-related genes:Candidate cancer biomarkers; Predicted intracellular proteins; Transporters:Transporter channels and pores	Cytosol;Golgi apparatus (Approved); Additional: Nuclear membrane;Nucleoplasm			(M5890)HALLMARK TNFA SIGNALING VIA NFKB; (M5913)HALLMARK INTERFERON GAMMA RESPONSE	0	0	0	0	0	0	0	0	0	0	0	0	0	0	0	0	0	1	0	0
TPTEP1	387590	symbol	H. sapiens	387590	H. sapiens	TPTEP1	TPTE pseudogene 1								0	0	0	0	0	0	0	0	0	0	0	0	0	0	0	0	0	0	0	0
TRIM25	7706	symbol	H. sapiens	7706	H. sapiens	TRIM25	tripartite motif containing 25	GO:1902187 negative regulation of viral release from host cell;GO:0046597 negative regulation of viral entry into host cell;GO:1903901 negative regulation of viral life cycle		Cancer-related genes:Candidate cancer biomarkers; ENZYME proteins:Transferases; ENZYME proteins:Ligase; Predicted intracellular proteins; Enzymes	Cytosol;Nucleoplasm (Approved); Additional: Nuclear bodies			(M5911)HALLMARK INTERFERON ALPHA RESPONSE; (M5913)HALLMARK INTERFERON GAMMA RESPONSE	0	0	0	0	1	0	0	1	0	0	0	0	0	0	0	0	0	0	0	0
TRPA1	8989	symbol	H. sapiens	8989	H. sapiens	TRPA1	transient receptor potential cation channel subfamily A member 1	GO:0050968 detection of chemical stimulus involved in sensory perception of pain;GO:0050955 thermoception;GO:0050966 detection of mechanical stimulus involved in sensory perception of pain		Transporters:Transporter channels and pores; FDA approved drug targets:Small molecule drugs; Voltage-gated ion channels:Transient Receptor Potential Channels; Disease related genes		Levomenthol; Camphor; Cannabidiol; Butamben; (S)-camphor; Tetrahydrocannabivarin; Medical Cannabis; Nabiximols; Cannabidivarin			0	0	0	0	1	0	0	0	0	0	0	0	0	0	0	0	0	0	1	1
TRPV3	162514	symbol	H. sapiens	162514	H. sapiens	TRPV3	transient receptor potential cation channel subfamily V member 3	GO:0042636 negative regulation of hair cycle;GO:0090280 positive regulation of calcium ion import;GO:0098703 calcium ion import across plasma membrane		FDA approved drug targets:Small molecule drugs; Disease related genes	Plasma membrane (Approved); Additional: Centrosome;Cytosol	Levomenthol; Camphor; Cannabidiol; Eugenol; (S)-camphor; Medical Cannabis; Nabiximols			0	0	0	0	1	0	0	0	0	0	0	0	0	0	0	0	0	0	1	1
TSHZ2	128553	symbol	H. sapiens	128553	H. sapiens	TSHZ2	teashirt zinc finger homeobox 2	GO:0006357 regulation of transcription by RNA polymerase II;GO:0006366 transcription by RNA polymerase II;GO:0006355 regulation of transcription, DNA-templated		Predicted intracellular proteins; Transcription factors:Helix-turn-helix domains	Golgi apparatus (Approved); Additional: Nucleoplasm				0	0	0	0	0	0	0	0	0	0	0	0	0	0	0	0	0	0	0	0
TTC7A	57217	symbol	H. sapiens	57217	H. sapiens	TTC7A	tetratricopeptide repeat domain 7A	GO:0046854 phosphatidylinositol phosphate biosynthetic process;GO:0006879 cellular iron ion homeostasis;GO:0055072 iron ion homeostasis		Predicted intracellular proteins; Disease related genes					0	0	0	0	0	1	0	0	1	0	0	0	0	0	0	0	0	0	1	0
UBE2F	140739	symbol	H. sapiens	140739	H. sapiens	UBE2F	ubiquitin conjugating enzyme E2 F (putative)	GO:0045116 protein neddylation;GO:0043687 post-translational protein modification;GO:0032446 protein modification by small protein conjugation		ENZYME proteins:Transferases; Predicted intracellular proteins; Enzymes	Cytosol (Approved)				0	0	0	0	0	0	0	0	0	0	0	0	0	0	0	0	0	0	0	0
USP25	29761	symbol	H. sapiens	29761	H. sapiens	USP25	ubiquitin specific peptidase 25	GO:1904293 negative regulation of ERAD pathway;GO:1904292 regulation of ERAD pathway;GO:0070536 protein K63-linked deubiquitination		Predicted intracellular proteins; Peptidases:Cysteine-type peptidases; ENZYME proteins:Hydrolases; Enzymes	Cytosol (Supported)				0	0	0	0	1	0	0	0	0	0	0	0	0	0	0	0	0	0	0	0
USP33	23032	symbol	H. sapiens	23032	H. sapiens	USP33	ubiquitin specific peptidase 33	GO:0070536 protein K63-linked deubiquitination;GO:0071108 protein K48-linked deubiquitination;GO:0051298 centrosome duplication		Predicted intracellular proteins; Peptidases:Cysteine-type peptidases; ENZYME proteins:Hydrolases; Enzymes	Golgi apparatus;Nucleoplasm (Supported)				0	0	0	0	0	0	0	0	0	0	0	0	0	0	1	1	0	0	0	0
USP43	124739	symbol	H. sapiens	124739	H. sapiens	USP43	ubiquitin specific peptidase 43	GO:0019985 translesion synthesis;GO:0006301 postreplication repair;GO:0000731 DNA synthesis involved in DNA repair		Predicted intracellular proteins; Peptidases:Cysteine-type peptidases; ENZYME proteins:Hydrolases; Enzymes					0	0	0	0	0	0	0	0	0	0	0	0	0	0	0	0	0	0	0	0
USP54	159195	symbol	H. sapiens	159195	H. sapiens	USP54	ubiquitin specific peptidase 54	GO:0016579 protein deubiquitination;GO:0070646 protein modification by small protein removal;GO:0070647 protein modification by small protein conjugation or removal		Predicted intracellular proteins; Peptidases:Cysteine-type peptidases; Enzymes	Mitochondria (Approved)				0	0	0	0	0	0	0	0	0	0	0	0	0	0	0	0	0	0	0	0
VAMP3	9341	symbol	H. sapiens	9341	H. sapiens	VAMP3	vesicle associated membrane protein 3	GO:1903593 regulation of histamine secretion by mast cell;GO:0002349 histamine production involved in inflammatory response;GO:0002441 histamine secretion involved in inflammatory response		Cancer-related genes:Candidate cancer biomarkers; Transporters:Transporter channels and pores			(M67)PID ARF6 TRAFFICKING PATHWAY	(M5910)HALLMARK PROTEIN SECRETION	0	0	0	0	0	0	1	0	1	1	0	0	0	0	0	0	0	1	0	0
VAMP4	8674	symbol	H. sapiens	8674	H. sapiens	VAMP4	vesicle associated membrane protein 4	GO:0016189 synaptic vesicle to endosome fusion;GO:0099532 synaptic vesicle endosomal processing;GO:0090161 Golgi ribbon formation			Golgi apparatus (Approved)			(M5910)HALLMARK PROTEIN SECRETION	0	0	0	0	0	0	0	0	1	0	0	0	0	0	0	1	0	1	0	0
VPS26A	9559	symbol	H. sapiens	9559	H. sapiens	VPS26A	VPS26, retromer complex component A	GO:0032456 endocytic recycling;GO:0042147 retrograde transport, endosome to Golgi;GO:0098876 vesicle-mediated transport to the plasma membrane		Predicted intracellular proteins	Endosomes;Lysosomes (Enhanced)				0	0	0	0	0	0	0	0	1	0	0	0	0	0	0	0	0	0	0	0
VPS35	55737	symbol	H. sapiens	55737	H. sapiens	VPS35	VPS35 retromer complex component	GO:2000331 regulation of terminal button organization;GO:1902823 negative regulation of late endosome to lysosome transport;GO:1903336 negative regulation of vacuolar transport		Predicted intracellular proteins; Disease related genes	Endosomes;Lysosomes (Supported)				0	0	0	1	0	0	1	0	1	0	0	0	1	1	0	0	0	1	0	0
WASF1	8936	symbol	H. sapiens	8936	H. sapiens	WASF1	WASP family member 1	GO:0098939 dendritic transport of mitochondrion;GO:0051388 positive regulation of neurotrophin TRK receptor signaling pathway;GO:0098885 modification of postsynaptic actin cytoskeleton		Predicted intracellular proteins			(M16801)SIG REGULATION OF THE ACTIN CYTOSKELETON BY RHO GTPASES; (M5193)SIG CHEMOTAXIS; (M278)PID RAC1 PATHWAY	(M5893)HALLMARK MITOTIC SPINDLE	1	0	0	1	1	0	1	0	0	0	0	1	1	0	0	1	0	0	0	0
WDFY4	57705	symbol	H. sapiens	57705	H. sapiens	WDFY4	WDFY family member 4	GO:0036037 CD8-positive, alpha-beta T cell activation;GO:0098586 cellular response to virus;GO:0019882 antigen processing and presentation		Predicted intracellular proteins	Nucleoplasm (Approved); Additional: Cytosol				0	0	0	0	0	0	0	0	0	0	0	0	0	0	0	0	0	0	0	0
WISP2	8839	gene_synonym	H. sapiens	8839	H. sapiens	CCN5	cellular communication network factor 5	GO:0060548 negative regulation of cell death;GO:0007155 cell adhesion;GO:0022610 biological adhesion		Predicted secreted proteins			(M3008)NABA ECM GLYCOPROTEINS; (M5884)NABA CORE MATRISOME; (M5889)NABA MATRISOME	(M5891)HALLMARK HYPOXIA; (M5906)HALLMARK ESTROGEN RESPONSE EARLY; (M5907)HALLMARK ESTROGEN RESPONSE LATE	0	0	0	0	0	0	0	0	0	0	0	0	0	0	0	0	0	0	0	0
WNK1	65125	symbol	H. sapiens	65125	H. sapiens	WNK1	WNK lysine deficient protein kinase 1	GO:0097022 lymphocyte migration into lymph node;GO:0033633 negative regulation of cell-cell adhesion mediated by integrin;GO:0038116 chemokine (C-C motif) ligand 21 signaling pathway	Other	ENZYME proteins:Transferases; Kinases; Predicted intracellular proteins; Enzymes; Disease related genes; Potential drug targets	Cytosol (Supported)				0	0	0	0	0	0	1	0	0	1	0	0	0	0	1	0	0	1	1	1
WWP1	11059	symbol	H. sapiens	11059	H. sapiens	WWP1	WW domain containing E3 ubiquitin protein ligase 1	GO:0046718 viral entry into host cell;GO:0044409 entry into host;GO:0052126 movement in host environment		ENZYME proteins:Transferases; Predicted intracellular proteins; Enzymes	Cytosol (Approved); Additional: Golgi apparatus;Plasma membrane		(M13)PID ERBB4 PATHWAY; (M236)PID DELTA NP63 PATHWAY; (M256)PID TAP63 PATHWAY	(M5939)HALLMARK P53 PATHWAY	0	0	0	0	1	0	0	0	0	0	0	1	0	0	0	0	0	0	0	1
XG	7499	symbol	H. sapiens	7499	H. sapiens	XG	Xg glycoprotein (Xg blood group)	GO:2000391 positive regulation of neutrophil extravasation;GO:2000389 regulation of neutrophil extravasation;GO:0072683 T cell extravasation		Blood group antigen proteins					0	0	0	0	0	0	0	0	0	0	0	0	0	0	1	0	0	0	0	0
YWHAB	7529	symbol	H. sapiens	7529	H. sapiens	YWHAB	tyrosine 3-monooxygenase/tryptophan 5-monooxygenase activation protein beta	GO:0051220 cytoplasmic sequestering of protein;GO:0035308 negative regulation of protein dephosphorylation;GO:0035305 negative regulation of dephosphorylation		Cancer-related genes:Candidate cancer biomarkers; Predicted intracellular proteins	Cytosol (Supported); Additional: Nucleoli rim;Nucleoplasm	Copper; Phenethyl Isothiocyanate	(M199)PID P38 MK2 PATHWAY; (M247)PID INSULIN GLUCOSE PATHWAY; (M30)PID HDAC CLASSII PATHWAY	(M5923)HALLMARK PI3K AKT MTOR SIGNALING	0	0	0	0	1	0	0	0	0	0	0	1	0	0	0	0	0	0	0	0
ZADH2	284273	symbol	H. sapiens	284273	H. sapiens	ZADH2	zinc binding alcohol dehydrogenase domain containing 2	GO:0006692 prostanoid metabolic process;GO:0006693 prostaglandin metabolic process;GO:0045599 negative regulation of fat cell differentiation		Predicted intracellular proteins; Enzymes; ENZYME proteins:Oxidoreductases	Vesicles (Approved); Additional: Golgi apparatus;Nucleoplasm				0	0	0	0	0	0	0	0	0	0	0	0	0	0	0	0	0	0	0	0
ZC2HC1A	51101	symbol	H. sapiens	51101	H. sapiens	ZC2HC1A	zinc finger C2HC-type containing 1A			Predicted intracellular proteins	Cytosol (Approved); Additional: Actin filaments				0	0	0	0	0	0	0	0	0	0	0	0	0	0	0	0	0	0	0	0
ZC3H7A	29066	symbol	H. sapiens	29066	H. sapiens	ZC3H7A	zinc finger CCCH-type containing 7A	GO:0035196 production of miRNAs involved in gene silencing by miRNA;GO:0031050 dsRNA processing;GO:0070918 production of small RNA involved in gene silencing by RNA		Predicted intracellular proteins	Cytosol (Supported)				0	0	0	0	0	0	0	0	0	0	0	0	0	0	0	0	0	0	0	0
ZDHHC6	64429	symbol	H. sapiens	64429	H. sapiens	ZDHHC6	zinc finger DHHC-type palmitoyltransferase 6	GO:0010636 positive regulation of mitochondrial fusion;GO:0010635 regulation of mitochondrial fusion;GO:0018230 peptidyl-L-cysteine S-palmitoylation		ENZYME proteins:Transferases; Enzymes					0	0	0	0	0	0	0	0	1	0	0	0	1	0	0	0	0	0	0	0
ZEB1	6935	symbol	H. sapiens	6935	H. sapiens	ZEB1	zinc finger E-box binding homeobox 1	GO:0045602 negative regulation of endothelial cell differentiation;GO:0045601 regulation of endothelial cell differentiation;GO:0030857 negative regulation of epithelial cell differentiation		Predicted intracellular proteins; Disease related genes; Transcription factors:Helix-turn-helix domains	Nucleoplasm (Supported); Additional: Nucleoli		(M71)PID ILK PATHWAY	(M5921)HALLMARK COMPLEMENT	0	0	0	0	1	0	0	1	0	0	0	0	0	0	0	0	0	0	0	0
ZFP3	124961	symbol	H. sapiens	124961	H. sapiens	ZFP3	ZFP3 zinc finger protein	GO:0006357 regulation of transcription by RNA polymerase II;GO:0006366 transcription by RNA polymerase II;GO:0006355 regulation of transcription, DNA-templated		Transcription factors:Zinc-coordinating DNA-binding domains; Predicted intracellular proteins	Cytosol;Nucleoplasm (Approved)				0	0	0	0	0	0	0	0	0	0	0	0	0	0	0	0	0	0	0	0
ZFP36L1	677	symbol	H. sapiens	677	H. sapiens	ZFP36L1	ZFP36 ring finger protein like 1	GO:0097403 cellular response to raffinose;GO:1901545 response to raffinose;GO:0003342 proepicardium development		Cancer-related genes:Mutational cancer driver genes; Predicted intracellular proteins			(M254)PID MYC REPRESS PATHWAY	(M5939)HALLMARK P53 PATHWAY	0	0	0	0	1	0	0	0	0	1	0	0	0	1	0	0	0	0	0	0
ZFP91	80829	symbol	H. sapiens	80829	H. sapiens	ZFP91	ZFP91 zinc finger protein, atypical E3 ubiquitin ligase	GO:0007250 activation of NF-kappaB-inducing kinase activity;GO:0070534 protein K63-linked ubiquitination;GO:0038061 NIK/NF-kappaB signaling		ENZYME proteins:Transferases; Transcription factors:Zinc-coordinating DNA-binding domains; Enzymes; Predicted intracellular proteins	Nucleoli;Nucleoplasm (Supported)		(M5883)NABA SECRETED FACTORS; (M5885)NABA MATRISOME ASSOCIATED; (M5889)NABA MATRISOME		0	0	0	0	0	0	0	0	0	0	0	0	0	0	0	0	0	0	0	0
ZFYVE16	9765	symbol	H. sapiens	9765	H. sapiens	ZFYVE16	zinc finger FYVE-type containing 16	GO:0006622 protein targeting to lysosome;GO:0006623 protein targeting to vacuole;GO:0061462 protein localization to lysosome		Predicted intracellular proteins	Cytosol;Vesicles (Enhanced)		(M181)PID BMP PATHWAY; (M286)PID TGFBR PATHWAY		0	0	0	0	1	0	0	0	0	0	0	0	0	0	0	1	0	0	0	0
ZHX3	23051	symbol	H. sapiens	23051	H. sapiens	ZHX3	zinc fingers and homeoboxes 3	GO:0045669 positive regulation of osteoblast differentiation;GO:0045667 regulation of osteoblast differentiation;GO:0001649 osteoblast differentiation		Predicted intracellular proteins; Transcription factors:Helix-turn-helix domains	Nucleoplasm (Supported)				0	0	0	0	0	0	0	0	0	0	0	0	0	0	0	0	0	0	0	0
ZMIZ1-AS1	283050	symbol	H. sapiens	283050	H. sapiens	ZMIZ1-AS1	ZMIZ1 antisense RNA 1								0	0	0	0	0	0	0	0	0	0	0	0	0	0	0	0	0	0	0	0
ZNF137P	7696	symbol	H. sapiens	7696	H. sapiens	ZNF137P	zinc finger protein 137, pseudogene								0	0	0	0	0	0	0	0	0	0	0	0	0	0	0	0	0	0	0	0
ZNF217	7764	symbol	H. sapiens	7764	H. sapiens	ZNF217	zinc finger protein 217	GO:0000122 negative regulation of transcription by RNA polymerase II;GO:0045892 negative regulation of transcription, DNA-templated;GO:1903507 negative regulation of nucleic acid-templated transcription		Transcription factors:Zinc-coordinating DNA-binding domains; Predicted intracellular proteins	Nuclear speckles (Enhanced)				0	0	0	0	0	0	0	0	0	0	0	0	0	0	0	0	0	0	0	0
ZNF331	55422	symbol	H. sapiens	55422	H. sapiens	ZNF331	zinc finger protein 331	GO:0006357 regulation of transcription by RNA polymerase II;GO:0006366 transcription by RNA polymerase II;GO:0006355 regulation of transcription, DNA-templated		Transcription factors:Zinc-coordinating DNA-binding domains; Cancer-related genes; Predicted intracellular proteins	Nucleoplasm (Approved)				0	0	0	0	0	0	0	0	0	0	0	0	0	0	0	0	0	0	0	0
ZNF41	7592	symbol	H. sapiens	7592	H. sapiens	ZNF41	zinc finger protein 41	GO:0006357 regulation of transcription by RNA polymerase II;GO:0006366 transcription by RNA polymerase II;GO:0006355 regulation of transcription, DNA-templated		Transcription factors:Zinc-coordinating DNA-binding domains; Disease related genes; Predicted intracellular proteins	Nucleoplasm (Approved)				0	0	0	0	0	0	0	0	0	0	0	0	0	0	0	0	0	0	0	0
ZNF429	353088	symbol	H. sapiens	353088	H. sapiens	ZNF429	zinc finger protein 429	GO:0006357 regulation of transcription by RNA polymerase II;GO:0006366 transcription by RNA polymerase II;GO:0006355 regulation of transcription, DNA-templated		Transcription factors:Zinc-coordinating DNA-binding domains; Predicted intracellular proteins	Nucleoplasm (Approved)				0	0	0	0	0	0	0	0	0	0	0	0	0	0	0	0	0	0	0	0
ZNF503-AS1	253264	symbol	H. sapiens	253264	H. sapiens	ZNF503-AS1	ZNF503 antisense RNA 1								0	0	0	0	0	0	0	0	0	0	0	0	0	0	0	0	0	0	0	0
ZNF572	137209	symbol	H. sapiens	137209	H. sapiens	ZNF572	zinc finger protein 572	GO:0000122 negative regulation of transcription by RNA polymerase II;GO:0045892 negative regulation of transcription, DNA-templated;GO:1903507 negative regulation of nucleic acid-templated transcription		Transcription factors:Zinc-coordinating DNA-binding domains; Predicted intracellular proteins	Nuclear speckles (Approved)				0	0	0	0	0	0	0	0	0	0	0	0	0	0	0	0	0	0	0	0
ZNF596	169270	symbol	H. sapiens	169270	H. sapiens	ZNF596	zinc finger protein 596	GO:0000122 negative regulation of transcription by RNA polymerase II;GO:0045892 negative regulation of transcription, DNA-templated;GO:1903507 negative regulation of nucleic acid-templated transcription		Transcription factors:Zinc-coordinating DNA-binding domains; Predicted intracellular proteins	Mitochondria;Nucleoli (Approved)				0	0	0	0	0	0	0	0	0	0	0	0	0	0	0	0	0	0	0	0

## Sheet: Enrichment
GroupID	Category	Term	Description	LogP	Log(q-value)	InTerm_InList	Genes	Symbols
1_Summary	WikiPathways	WP437	EGF/EGFR signaling pathway	-7.45411	-3.49409	15/164	1432,2308,4205,4690,5295,5594,5601,5879,5898,5906,8867,10006,30011,50807,51196,150,347,1176,2254,2660,4313,4653,5166,5618,6778,8936,25778,51552,55294,64094,79987,220164,102,355,1901,5654,8650,9209,57007,5306,5603,22885,4620,3676,113,9051,10681,54331	MAPK14,FOXO1,MEF2A,NCK1,PIK3R1,MAPK1,MAPK9,RAC1,RALA,RAP1A,SYNJ1,ABI1,SH3KBP1,ASAP1,PLCE1,ADRA2A,APOD,AP3S1,FGF9,MSTN,MMP2,MYOC,PDK4,PRLR,STAT6,WASF1,DSTYK,RAB14,FBXW7,SMOC2,SVEP1,DOK6,ADAM10,FAS,S1PR1,HTRA1,NUMB,LRRFIP2,ACKR3,PITPNA,MAPK13,ABLIM3,MYH2,ITGA4,ADCY7,PSTPIP1,GNB5,GNG2
1_Member	WikiPathways	WP437	EGF/EGFR signaling pathway	-7.45411	-3.49409	15/164	1432,2308,4205,4690,5295,5594,5601,5879,5898,5906,8867,10006,30011,50807,51196	MAPK14,FOXO1,MEF2A,NCK1,PIK3R1,MAPK1,MAPK9,RAC1,RALA,RAP1A,SYNJ1,ABI1,SH3KBP1,ASAP1,PLCE1
1_Member	GO Biological Processes	GO:0007169	transmembrane receptor protein tyrosine kinase signaling pathway	-4.84137	-1.94206	25/629	150,347,1176,1432,2254,2308,2660,4313,4653,4690,5166,5295,5594,5618,5879,6778,8936,10006,25778,51196,51552,55294,64094,79987,220164	ADRA2A,APOD,AP3S1,MAPK14,FGF9,FOXO1,MSTN,MMP2,MYOC,NCK1,PDK4,PIK3R1,MAPK1,PRLR,RAC1,STAT6,WASF1,ABI1,DSTYK,PLCE1,RAB14,FBXW7,SMOC2,SVEP1,DOK6
1_Member	WikiPathways	WP3888	VEGFA-VEGFR2 signaling pathway	-4.29996	-1.76432	19/439	102,355,1432,1901,2308,4313,4690,5295,5594,5601,5654,5879,5906,6778,8650,8867,8936,9209,57007	ADAM10,FAS,MAPK14,S1PR1,FOXO1,MMP2,NCK1,PIK3R1,MAPK1,MAPK9,HTRA1,RAC1,RAP1A,STAT6,NUMB,SYNJ1,WASF1,LRRFIP2,ACKR3
1_Member	Reactome Gene Sets	R-HSA-373752	Netrin-1 signaling	-3.9688	-1.62829	6/50	1432,4690,5306,5603,5879,22885	MAPK14,NCK1,PITPNA,MAPK13,RAC1,ABLIM3
1_Member	Reactome Gene Sets	R-HSA-5663213	RHO GTPases Activate WASPs and WAVEs	-3.69339	-1.45717	5/36	4690,5594,5879,8936,10006	NCK1,MAPK1,RAC1,WASF1,ABI1
1_Member	Reactome Gene Sets	R-HSA-9664407	Parasite infection	-3.5661	-1.38589	6/59	4620,4690,5594,5879,8936,10006	MYH2,NCK1,MAPK1,RAC1,WASF1,ABI1
1_Member	Reactome Gene Sets	R-HSA-9664417	Leishmania phagocytosis	-3.5661	-1.38589	6/59	4620,4690,5594,5879,8936,10006	MYH2,NCK1,MAPK1,RAC1,WASF1,ABI1
1_Member	Reactome Gene Sets	R-HSA-9664422	FCGR3A-mediated phagocytosis	-3.5661	-1.38589	6/59	4620,4690,5594,5879,8936,10006	MYH2,NCK1,MAPK1,RAC1,WASF1,ABI1
1_Member	Reactome Gene Sets	R-HSA-2029482	Regulation of actin dynamics for phagocytic cup formation	-3.48645	-1.32064	6/61	4620,4690,5594,5879,8936,10006	MYH2,NCK1,MAPK1,RAC1,WASF1,ABI1
1_Member	Reactome Gene Sets	R-HSA-2029480	Fcgamma receptor (FCGR) dependent phagocytosis	-3.46666	-1.31177	7/86	4620,4690,5295,5594,5879,8936,10006	MYH2,NCK1,PIK3R1,MAPK1,RAC1,WASF1,ABI1
1_Member	Reactome Gene Sets	R-HSA-4420097	VEGFA-VEGFR2 Pathway	-3.09716	-1.09725	7/99	1432,4690,5295,5603,5879,8936,10006	MAPK14,NCK1,PIK3R1,MAPK13,RAC1,WASF1,ABI1
1_Member	Reactome Gene Sets	R-HSA-418885	DCC mediated attractive signaling	-2.95066	-1.03299	3/14	4690,5879,22885	NCK1,RAC1,ABLIM3
1_Member	Reactome Gene Sets	R-HSA-194138	Signaling by VEGF	-2.87508	-0.99895	7/108	1432,4690,5295,5603,5879,8936,10006	MAPK14,NCK1,PIK3R1,MAPK13,RAC1,WASF1,ABI1
1_Member	Canonical Pathways	M277	PID INTEGRIN A4B1 PATHWAY	-2.81843	-0.967262	4/33	3676,4620,5879,10006	ITGA4,MYH2,RAC1,ABI1
1_Member	Reactome Gene Sets	R-HSA-9658195	Leishmania infection	-2.72753	-0.902109	11/254	113,1432,4620,4690,5594,5879,8936,9051,10006,10681,54331	ADCY7,MAPK14,MYH2,NCK1,MAPK1,RAC1,WASF1,PSTPIP1,ABI1,GNB5,GNG2
2_Summary	GO Biological Processes	GO:0030198	extracellular matrix organization	-7.32432	-3.49409	20/302	102,822,1520,1803,1805,2331,4313,4321,6423,8434,10516,10630,23127,25975,28984,64093,64094,84168,84830,151887,1073,5295,8867,9448,11075,11213,29767,54463,55294,132671,1508,5906,3676,3910,5654	ADAM10,CAPG,CTSS,DPP4,DPT,FMOD,MMP2,MMP12,SFRP2,RECK,FBLN5,PDPN,COLGALT2,EGFL6,RGCC,SMOC1,SMOC2,ANTXR1,ADTRP,CCDC80,CFL2,PIK3R1,SYNJ1,MAP4K4,STMN2,IRAK3,TMOD2,RETREG1,FBXW7,SPATA18,CTSB,RAP1A,ITGA4,LAMA4,HTRA1
2_Member	GO Biological Processes	GO:0030198	extracellular matrix organization	-7.32432	-3.49409	20/302	102,822,1520,1803,1805,2331,4313,4321,6423,8434,10516,10630,23127,25975,28984,64093,64094,84168,84830,151887	ADAM10,CAPG,CTSS,DPP4,DPT,FMOD,MMP2,MMP12,SFRP2,RECK,FBLN5,PDPN,COLGALT2,EGFL6,RGCC,SMOC1,SMOC2,ANTXR1,ADTRP,CCDC80
2_Member	GO Biological Processes	GO:0043062	extracellular structure organization	-7.30069	-3.49409	20/303	102,822,1520,1803,1805,2331,4313,4321,6423,8434,10516,10630,23127,25975,28984,64093,64094,84168,84830,151887	ADAM10,CAPG,CTSS,DPP4,DPT,FMOD,MMP2,MMP12,SFRP2,RECK,FBLN5,PDPN,COLGALT2,EGFL6,RGCC,SMOC1,SMOC2,ANTXR1,ADTRP,CCDC80
2_Member	GO Biological Processes	GO:0045229	external encapsulating structure organization	-7.25374	-3.49409	20/305	102,822,1520,1803,1805,2331,4313,4321,6423,8434,10516,10630,23127,25975,28984,64093,64094,84168,84830,151887	ADAM10,CAPG,CTSS,DPP4,DPT,FMOD,MMP2,MMP12,SFRP2,RECK,FBLN5,PDPN,COLGALT2,EGFL6,RGCC,SMOC1,SMOC2,ANTXR1,ADTRP,CCDC80
2_Member	GO Biological Processes	GO:0022617	extracellular matrix disassembly	-4.23566	-1.72521	7/65	102,822,1520,1803,4313,4321,10630	ADAM10,CAPG,CTSS,DPP4,MMP2,MMP12,PDPN
2_Member	GO Biological Processes	GO:0022411	cellular component disassembly	-3.24765	-1.1797	17/448	102,822,1073,1520,1803,4313,4321,5295,8867,9448,10630,11075,11213,29767,54463,55294,132671	ADAM10,CAPG,CFL2,CTSS,DPP4,MMP2,MMP12,PIK3R1,SYNJ1,MAP4K4,PDPN,STMN2,IRAK3,TMOD2,RETREG1,FBXW7,SPATA18
2_Member	GO Biological Processes	GO:0030574	collagen catabolic process	-2.428	-0.729759	4/42	1508,1520,4313,4321	CTSB,CTSS,MMP2,MMP12
2_Member	GO Biological Processes	GO:0032963	collagen metabolic process	-2.28636	-0.653297	6/104	1508,1520,4313,4321,5906,28984	CTSB,CTSS,MMP2,MMP12,RAP1A,RGCC
2_Member	Reactome Gene Sets	R-HSA-1474244	Extracellular matrix organization	-2.17343	-0.588422	11/301	102,1508,1520,2331,3676,3910,4313,4321,5654,10516,23127	ADAM10,CTSB,CTSS,FMOD,ITGA4,LAMA4,MMP2,MMP12,HTRA1,FBLN5,COLGALT2
3_Summary	GO Biological Processes	GO:0030031	cell projection assembly	-7.04923	-3.38649	28/578	822,1767,1901,2012,2332,2660,4690,4750,5295,5376,5879,5898,5906,8555,8814,9371,9448,22832,22885,23322,23639,26052,50807,51196,55212,57562,58480,79738,80817	CAPG,DNAH5,S1PR1,EMP1,FMR1,MSTN,NCK1,NEK1,PIK3R1,PMP22,RAC1,RALA,RAP1A,CDC14B,CDKL1,KIF3B,MAP4K4,CEP162,ABLIM3,RPGRIP1L,DNAAF11,DNM3,ASAP1,PLCE1,BBS7,CEP126,RHOU,BBS10,CEP44
3_Member	GO Biological Processes	GO:0030031	cell projection assembly	-7.04923	-3.38649	28/578	822,1767,1901,2012,2332,2660,4690,4750,5295,5376,5879,5898,5906,8555,8814,9371,9448,22832,22885,23322,23639,26052,50807,51196,55212,57562,58480,79738	CAPG,DNAH5,S1PR1,EMP1,FMR1,MSTN,NCK1,NEK1,PIK3R1,PMP22,RAC1,RALA,RAP1A,CDC14B,CDKL1,KIF3B,MAP4K4,CEP162,ABLIM3,RPGRIP1L,DNAAF11,DNM3,ASAP1,PLCE1,BBS7,CEP126,RHOU,BBS10
3_Member	GO Biological Processes	GO:0120031	plasma membrane bounded cell projection assembly	-6.17759	-2.69792	26/564	1767,1901,2012,2332,2660,4690,4750,5295,5376,5879,5898,5906,8555,8814,9371,9448,22832,22885,23322,23639,26052,50807,51196,55212,57562,79738	DNAH5,S1PR1,EMP1,FMR1,MSTN,NCK1,NEK1,PIK3R1,PMP22,RAC1,RALA,RAP1A,CDC14B,CDKL1,KIF3B,MAP4K4,CEP162,ABLIM3,RPGRIP1L,DNAAF11,DNM3,ASAP1,PLCE1,BBS7,CEP126,BBS10
3_Member	GO Biological Processes	GO:0060271	cilium assembly	-2.39002	-0.710452	13/364	1767,4750,8555,8814,9371,22832,22885,23322,23639,50807,55212,57562,79738	DNAH5,NEK1,CDC14B,CDKL1,KIF3B,CEP162,ABLIM3,RPGRIP1L,DNAAF11,ASAP1,BBS7,CEP126,BBS10
3_Member	WikiPathways	WP4536	Genes related to primary cilium development (based on CRISPR)	-2.3067	-0.662667	6/103	9371,22832,23322,55212,79738,80817	KIF3B,CEP162,RPGRIP1L,BBS7,BBS10,CEP44
3_Member	GO Biological Processes	GO:0044782	cilium organization	-2.11072	-0.547403	13/394	1767,4750,8555,8814,9371,22832,22885,23322,23639,50807,55212,57562,79738	DNAH5,NEK1,CDC14B,CDKL1,KIF3B,CEP162,ABLIM3,RPGRIP1L,DNAAF11,ASAP1,BBS7,CEP126,BBS10
4_Summary	GO Biological Processes	GO:0097581	lamellipodium organization	-6.90419	-3.32063	11/90	1901,2660,4690,5168,5295,5879,8936,10006,10630,22885,51196,2332,5898,26052,102,567,5376,5906,6423,8724,8814,9448,9638,11075,55737,113,5594,8605,8611	S1PR1,MSTN,NCK1,ENPP2,PIK3R1,RAC1,WASF1,ABI1,PDPN,ABLIM3,PLCE1,FMR1,RALA,DNM3,ADAM10,B2M,PMP22,RAP1A,SFRP2,SNX3,CDKL1,MAP4K4,FEZ1,STMN2,VPS35,ADCY7,MAPK1,PLA2G4C,PLPP1
4_Member	GO Biological Processes	GO:0097581	lamellipodium organization	-6.90419	-3.32063	11/90	1901,2660,4690,5168,5295,5879,8936,10006,10630,22885,51196	S1PR1,MSTN,NCK1,ENPP2,PIK3R1,RAC1,WASF1,ABI1,PDPN,ABLIM3,PLCE1
4_Member	GO Biological Processes	GO:0030032	lamellipodium assembly	-3.94971	-1.61524	7/72	1901,2660,4690,5295,5879,22885,51196	S1PR1,MSTN,NCK1,PIK3R1,RAC1,ABLIM3,PLCE1
4_Member	GO Biological Processes	GO:1902743	regulation of lamellipodium organization	-3.78007	-1.51527	6/54	2660,5168,5295,5879,10630,51196	MSTN,ENPP2,PIK3R1,RAC1,PDPN,PLCE1
4_Member	GO Biological Processes	GO:1902745	positive regulation of lamellipodium organization	-3.63575	-1.40758	5/37	2660,5168,5295,5879,51196	MSTN,ENPP2,PIK3R1,RAC1,PLCE1
4_Member	GO Biological Processes	GO:0010592	positive regulation of lamellipodium assembly	-3.0339	-1.07531	4/29	2660,5295,5879,51196	MSTN,PIK3R1,RAC1,PLCE1
4_Member	GO Biological Processes	GO:0051491	positive regulation of filopodium assembly	-2.97695	-1.04053	4/30	2332,5295,5898,26052	FMR1,PIK3R1,RALA,DNM3
4_Member	GO Biological Processes	GO:0120034	positive regulation of plasma membrane bounded cell projection assembly	-2.94643	-1.03188	7/105	2332,2660,5295,5879,5898,26052,51196	FMR1,MSTN,PIK3R1,RAC1,RALA,DNM3,PLCE1
4_Member	GO Biological Processes	GO:0120035	regulation of plasma membrane bounded cell projection organization	-2.92494	-1.02879	21/655	102,567,2332,2660,4690,5168,5295,5376,5879,5898,5906,6423,8724,8814,9448,9638,10630,11075,26052,51196,55737	ADAM10,B2M,FMR1,MSTN,NCK1,ENPP2,PIK3R1,PMP22,RAC1,RALA,RAP1A,SFRP2,SNX3,CDKL1,MAP4K4,FEZ1,PDPN,STMN2,DNM3,PLCE1,VPS35
4_Member	GO Biological Processes	GO:0031344	regulation of cell projection organization	-2.7817	-0.937185	21/673	102,567,2332,2660,4690,5168,5295,5376,5879,5898,5906,6423,8724,8814,9448,9638,10630,11075,26052,51196,55737	ADAM10,B2M,FMR1,MSTN,NCK1,ENPP2,PIK3R1,PMP22,RAC1,RALA,RAP1A,SFRP2,SNX3,CDKL1,MAP4K4,FEZ1,PDPN,STMN2,DNM3,PLCE1,VPS35
4_Member	GO Biological Processes	GO:0031346	positive regulation of cell projection organization	-2.50189	-0.766521	13/353	2332,2660,4690,5168,5295,5879,5898,5906,8724,9638,11075,26052,51196	FMR1,MSTN,NCK1,ENPP2,PIK3R1,RAC1,RALA,RAP1A,SNX3,FEZ1,STMN2,DNM3,PLCE1
4_Member	GO Biological Processes	GO:0010591	regulation of lamellipodium assembly	-2.428	-0.729759	4/42	2660,5295,5879,51196	MSTN,PIK3R1,RAC1,PLCE1
4_Member	GO Biological Processes	GO:0051489	regulation of filopodium assembly	-2.25142	-0.637899	4/47	2332,5295,5898,26052	FMR1,PIK3R1,RALA,DNM3
4_Member	KEGG Pathway	ko04072	Phospholipase D signaling pathway	-2.14761	-0.574772	7/146	113,5295,5594,5898,8605,8611,26052	ADCY7,PIK3R1,MAPK1,RALA,PLA2G4C,PLPP1,DNM3
5_Summary	Canonical Pathways	M92	PID ANGIOPOIETIN RECEPTOR PATHWAY	-6.15654	-2.69792	8/49	1432,1997,2308,4313,4690,5295,5594,5879,5601,5603,5906,8867,9448,710,716,717,1073,51196,3556,11213,257397,220164,1901,10010,10558,259230,113,8605,8989,162514,50807,4205,4321,6935,9765,11059,1508,9051,22861,84168,84674,355,843,2796,54331,29761,55540,1780,1962,8936,5306,1520,26052,7529,10006,8650,30011,7706,2892,8611,3676,5898,10681,6778,5241,5618,2254,478,490,1366,143,53833,58985,8913,6801,971,885…	MAPK14,ELF1,FOXO1,MMP2,NCK1,PIK3R1,MAPK1,RAC1,MAPK9,MAPK13,RAP1A,SYNJ1,MAP4K4,SERPING1,C1S,C2,CFL2,PLCE1,IL1RAP,IRAK3,TAB3,DOK6,S1PR1,TANK,SPTLC1,SGMS1,ADCY7,PLA2G4C,TRPA1,TRPV3,ASAP1,MEF2A,MMP12,ZEB1,ZFYVE16,WWP1,CTSB,PSTPIP1,NLRP1,ANTXR1,CARD6,FAS,CASP10,GNRH1,GNG2,USP25,IL17RB,DYNC1I1,EHHADH,WASF1,PITPNA,CTSS,DNM3,YWHAB,ABI1,NUMB,SH3KBP1,TRIM25,GRIA3,PLPP1,ITGA4,RALA,GNB5,STAT6,PGR,PRLR,FGF9,A…
5_Member	Canonical Pathways	M92	PID ANGIOPOIETIN RECEPTOR PATHWAY	-6.15654	-2.69792	8/49	1432,1997,2308,4313,4690,5295,5594,5879	MAPK14,ELF1,FOXO1,MMP2,NCK1,PIK3R1,MAPK1,RAC1
5_Member	WikiPathways	WP3303	RAC1/PAK1/p38/MMP2 pathway	-5.99681	-2.60524	9/69	1432,2308,4313,4690,5295,5594,5601,5603,5879	MAPK14,FOXO1,MMP2,NCK1,PIK3R1,MAPK1,MAPK9,MAPK13,RAC1
5_Member	Canonical Pathways	M62	PID EPHB FWD PATHWAY	-5.66609	-2.34577	7/40	4690,5295,5594,5879,5906,8867,9448	NCK1,PIK3R1,MAPK1,RAC1,RAP1A,SYNJ1,MAP4K4
5_Member	KEGG Pathway	ko05133	Pertussis	-4.69054	-1.8684	8/76	710,716,717,1073,1432,5594,5601,5603	SERPING1,C1S,C2,CFL2,MAPK14,MAPK1,MAPK9,MAPK13
5_Member	KEGG Pathway	ko04933	AGE-RAGE signaling pathway in diabetic complications	-4.68604	-1.8684	9/99	1432,2308,4313,5295,5594,5601,5603,5879,51196	MAPK14,FOXO1,MMP2,PIK3R1,MAPK1,MAPK9,MAPK13,RAC1,PLCE1
5_Member	WikiPathways	WP195	IL-1 signaling pathway	-4.61086	-1.8285	7/57	1432,3556,5295,5594,5601,11213,257397	MAPK14,IL1RAP,PIK3R1,MAPK1,MAPK9,IRAK3,TAB3
5_Member	Canonical Pathways	M82	PID RET PATHWAY	-4.59521	-1.82726	6/39	4690,5295,5594,5879,5906,220164	NCK1,PIK3R1,MAPK1,RAC1,RAP1A,DOK6
5_Member	KEGG Pathway	hsa04071	Sphingolipid signaling pathway	-4.56422	-1.82594	10/128	1432,1901,5295,5594,5601,5603,5879,10010,10558,259230	MAPK14,S1PR1,PIK3R1,MAPK1,MAPK9,MAPK13,RAC1,TANK,SPTLC1,SGMS1
5_Member	KEGG Pathway	hsa04750	inflammatory mediator regulation of trp channels	-4.51438	-1.82562	9/104	113,1432,3556,5295,5601,5603,8605,8989,162514	ADCY7,MAPK14,IL1RAP,PIK3R1,MAPK9,MAPK13,PLA2G4C,TRPA1,TRPV3
5_Member	Canonical Pathways	M281	PID FAK PATHWAY	-4.51149	-1.82562	7/59	4690,5295,5594,5601,5879,5906,50807	NCK1,PIK3R1,MAPK1,MAPK9,RAC1,RAP1A,ASAP1
5_Member	KEGG Pathway	hsa05133	Pertussis	-4.48729	-1.81578	8/81	710,716,717,1073,1432,5594,5601,5603	SERPING1,C1S,C2,CFL2,MAPK14,MAPK1,MAPK9,MAPK13
5_Member	WikiPathways	WP366	TGF-beta signaling pathway	-4.42094	-1.80353	10/133	1432,4205,4321,5295,5594,5601,5879,6935,9765,11059	MAPK14,MEF2A,MMP12,PIK3R1,MAPK1,MAPK9,RAC1,ZEB1,ZFYVE16,WWP1
5_Member	KEGG Pathway	hsa04933	AGE-RAGE signaling pathway in diabetic complications	-4.41613	-1.80353	9/107	1432,2308,4313,5295,5594,5601,5603,5879,51196	MAPK14,FOXO1,MMP2,PIK3R1,MAPK1,MAPK9,MAPK13,RAC1,PLCE1
5_Member	KEGG Pathway	hsa04621	NOD-like receptor signaling pathway	-4.20376	-1.71252	11/170	1432,1508,5594,5601,5603,9051,10010,22861,84168,84674,257397	MAPK14,CTSB,MAPK1,MAPK9,MAPK13,PSTPIP1,TANK,NLRP1,ANTXR1,CARD6,TAB3
5_Member	KEGG Pathway	ko04621	NOD-like receptor signaling pathway	-4.20376	-1.71252	11/170	1432,1508,5594,5601,5603,9051,10010,22861,84168,84674,257397	MAPK14,CTSB,MAPK1,MAPK9,MAPK13,PSTPIP1,TANK,NLRP1,ANTXR1,CARD6,TAB3
5_Member	KEGG Pathway	hsa04668	TNF signaling pathway	-4.16987	-1.70733	9/115	355,843,1432,5295,5594,5601,5603,10010,257397	FAS,CASP10,MAPK14,PIK3R1,MAPK1,MAPK9,MAPK13,TANK,TAB3
5_Member	WikiPathways	WP3869	Cannabinoid receptor signaling	-4.15713	-1.7039	5/29	113,1432,5594,5601,5603	ADCY7,MAPK14,MAPK1,MAPK9,MAPK13
5_Member	KEGG Pathway	hsa04664	Fc epsilon RI signaling pathway	-4.10883	-1.68275	7/68	1432,5295,5594,5601,5603,5879,8605	MAPK14,PIK3R1,MAPK1,MAPK9,MAPK13,RAC1,PLA2G4C
5_Member	KEGG Pathway	ko04664	Fc epsilon RI signaling pathway	-4.10883	-1.68275	7/68	1432,5295,5594,5601,5603,5879,8605	MAPK14,PIK3R1,MAPK1,MAPK9,MAPK13,RAC1,PLA2G4C
5_Member	KEGG Pathway	hsa04912	GnRH signaling pathway	-4.08882	-1.68025	8/92	113,1432,2796,4313,5594,5601,5603,8605	ADCY7,MAPK14,GNRH1,MMP2,MAPK1,MAPK9,MAPK13,PLA2G4C
5_Member	KEGG Pathway	ko04912	GnRH signaling pathway	-4.08882	-1.68025	8/92	113,1432,2796,4313,5594,5601,5603,8605	ADCY7,MAPK14,GNRH1,MMP2,MAPK1,MAPK9,MAPK13,PLA2G4C
5_Member	KEGG Pathway	ko04071	Sphingolipid signaling pathway	-4.08291	-1.68025	9/118	1432,1901,5295,5594,5601,5603,5879,10558,259230	MAPK14,S1PR1,PIK3R1,MAPK1,MAPK9,MAPK13,RAC1,SPTLC1,SGMS1
5_Member	Canonical Pathways	M213	PID AR NONGENOMIC PATHWAY	-4.01241	-1.62842	5/31	2796,5295,5594,5879,54331	GNRH1,PIK3R1,MAPK1,RAC1,GNG2
5_Member	KEGG Pathway	hsa04657	IL-17 signaling pathway	-3.99009	-1.62829	8/95	1432,5594,5601,5603,10010,29761,55540,257397	MAPK14,MAPK1,MAPK9,MAPK13,TANK,USP25,IL17RB,TAB3
5_Member	KEGG Pathway	hsa05132	Salmonella infection	-3.99009	-1.62829	8/95	1432,1780,1962,5594,5601,5603,5879,8936	MAPK14,DYNC1I1,EHHADH,MAPK1,MAPK9,MAPK13,RAC1,WASF1
5_Member	WikiPathways	WP2637	Interleukin-1 (IL-1) structural pathway	-3.9688	-1.62829	6/50	1432,3556,5594,5601,10010,257397	MAPK14,IL1RAP,MAPK1,MAPK9,TANK,TAB3
5_Member	Canonical Pathways	M108	PID NETRIN PATHWAY	-3.94404	-1.61524	5/32	4690,5295,5306,5594,5879	NCK1,PIK3R1,PITPNA,MAPK1,RAC1
5_Member	Reactome Gene Sets	R-HSA-168898	Toll-like Receptor Cascades	-3.81672	-1.52203	10/157	1432,1508,1520,4205,5594,5601,10010,11213,26052,257397	MAPK14,CTSB,CTSS,MEF2A,MAPK1,MAPK9,TANK,IRAK3,DNM3,TAB3
5_Member	Canonical Pathways	M12705	SIG CD40PATHWAYMAP	-3.81445	-1.52203	5/34	1432,5295,5594,5601,5603	MAPK14,PIK3R1,MAPK1,MAPK9,MAPK13
5_Member	Canonical Pathways	M186	PID PDGFRB PATHWAY	-3.78621	-1.51527	9/129	1901,4690,5295,5594,5601,5879,5906,7529,10006	S1PR1,NCK1,PIK3R1,MAPK1,MAPK9,RAC1,RAP1A,YWHAB,ABI1
5_Member	Canonical Pathways	M48	PID MET PATHWAY	-3.69524	-1.45717	7/79	4690,5295,5594,5879,5906,8650,30011	NCK1,PIK3R1,MAPK1,RAC1,RAP1A,NUMB,SH3KBP1
5_Member	KEGG Pathway	ko04668	TNF signaling pathway	-3.60255	-1.39006	8/108	355,843,1432,5295,5594,5601,5603,257397	FAS,CASP10,MAPK14,PIK3R1,MAPK1,MAPK9,MAPK13,TAB3
5_Member	Canonical Pathways	M94	PID FAS PATHWAY	-3.57989	-1.38589	5/38	355,843,1432,5295,5601	FAS,CASP10,MAPK14,PIK3R1,MAPK9
5_Member	KEGG Pathway	hsa04370	VEGF signaling pathway	-3.5661	-1.38589	6/59	1432,5295,5594,5603,5879,8605	MAPK14,PIK3R1,MAPK1,MAPK13,RAC1,PLA2G4C
5_Member	KEGG Pathway	ko04370	VEGF signaling pathway	-3.5661	-1.38589	6/59	1432,5295,5594,5603,5879,8605	MAPK14,PIK3R1,MAPK1,MAPK13,RAC1,PLA2G4C
5_Member	WikiPathways	WP3865	Novel intracellular components of RIG-I-like receptor (RLR) pathway	-3.48645	-1.32064	6/61	843,1432,5601,5603,7706,10010	CASP10,MAPK14,MAPK9,MAPK13,TRIM25,TANK
5_Member	KEGG Pathway	ko05132	Salmonella infection	-3.46666	-1.31177	7/86	1432,1780,5594,5601,5603,5879,8936	MAPK14,DYNC1I1,MAPK1,MAPK9,MAPK13,RAC1,WASF1
5_Member	WikiPathways	WP2380	Brain-derived neurotrophic factor (BDNF) signaling pathway	-3.42952	-1.28792	9/144	1432,2892,4205,4690,5295,5594,5601,5879,5906	MAPK14,GRIA3,MEF2A,NCK1,PIK3R1,MAPK1,MAPK9,RAC1,RAP1A
5_Member	Reactome Gene Sets	R-HSA-450341	Activation of the AP-1 family of transcription factors	-3.41292	-1.28421	3/10	1432,5594,5601	MAPK14,MAPK1,MAPK9
5_Member	KEGG Pathway	hsa04722	Neurotrophin signaling pathway	-3.31739	-1.21042	8/119	1432,5295,5594,5601,5603,5879,5906,11213	MAPK14,PIK3R1,MAPK1,MAPK9,MAPK13,RAC1,RAP1A,IRAK3
5_Member	KEGG Pathway	ko04722	Neurotrophin signaling pathway	-3.31739	-1.21042	8/119	1432,5295,5594,5601,5603,5879,5906,11213	MAPK14,PIK3R1,MAPK1,MAPK9,MAPK13,RAC1,RAP1A,IRAK3
5_Member	WikiPathways	WP69	T-cell receptor (TCR) signaling pathway	-3.31686	-1.21042	7/91	355,1432,4690,5295,5594,5601,9051	FAS,MAPK14,NCK1,PIK3R1,MAPK1,MAPK9,PSTPIP1
5_Member	KEGG Pathway	hsa04666	Fc gamma R-mediated phagocytosis	-3.31686	-1.21042	7/91	1073,5295,5594,5879,8611,8936,50807	CFL2,PIK3R1,MAPK1,RAC1,PLPP1,WASF1,ASAP1
5_Member	KEGG Pathway	ko04666	Fc gamma R-mediated phagocytosis	-3.31686	-1.21042	7/91	1073,5295,5594,5879,8611,8936,50807	CFL2,PIK3R1,MAPK1,RAC1,PLPP1,WASF1,ASAP1
5_Member	WikiPathways	WP2324	AGE/RAGE pathway	-3.30023	-1.20569	6/66	1432,2308,4313,5594,5601,5879	MAPK14,FOXO1,MMP2,MAPK1,MAPK9,RAC1
5_Member	Canonical Pathways	M274	PID LYMPH ANGIOGENESIS PATHWAY	-3.28667	-1.19681	4/25	1432,3676,5295,5594	MAPK14,ITGA4,PIK3R1,MAPK1
5_Member	Reactome Gene Sets	R-HSA-376172	DSCAM interactions	-3.27954	-1.19658	3/11	1432,5603,5879	MAPK14,MAPK13,RAC1
5_Member	KEGG Pathway	ko04657	IL-17 signaling pathway	-3.25975	-1.1836	7/93	1432,5594,5601,5603,29761,55540,257397	MAPK14,MAPK1,MAPK9,MAPK13,USP25,IL17RB,TAB3
5_Member	WikiPathways	WP4223	Ras signaling	-3.24695	-1.1797	10/185	5295,5594,5601,5879,5898,5906,8605,10681,51196,54331	PIK3R1,MAPK1,MAPK9,RAC1,RALA,RAP1A,PLA2G4C,GNB5,PLCE1,GNG2
5_Member	KEGG Pathway	hsa05131	Shigellosis	-3.23042	-1.16973	6/68	1432,5594,5601,5603,5879,8936	MAPK14,MAPK1,MAPK9,MAPK13,RAC1,WASF1
5_Member	WikiPathways	WP4666	Hepatitis B infection	-3.21729	-1.16307	9/154	355,843,1432,5295,5594,5601,5603,6778,7529	FAS,CASP10,MAPK14,PIK3R1,MAPK1,MAPK9,MAPK13,STAT6,YWHAB
5_Member	KEGG Pathway	hsa01522	Endocrine resistance	-3.17687	-1.13945	7/96	113,1432,4313,5295,5594,5601,5603	ADCY7,MAPK14,MMP2,PIK3R1,MAPK1,MAPK9,MAPK13
5_Member	KEGG Pathway	hsa04914	Progesterone-mediated oocyte maturation	-3.17687	-1.13945	7/96	113,1432,5241,5295,5594,5601,5603	ADCY7,MAPK14,PGR,PIK3R1,MAPK1,MAPK9,MAPK13
5_Member	KEGG Pathway	ko01522	Endocrine resistance	-3.17687	-1.13945	7/96	113,1432,4313,5295,5594,5601,5603	ADCY7,MAPK14,MMP2,PIK3R1,MAPK1,MAPK9,MAPK13
5_Member	KEGG Pathway	ko04914	Progesterone-mediated oocyte maturation	-3.17687	-1.13945	7/96	113,1432,5241,5295,5594,5601,5603	ADCY7,MAPK14,PGR,PIK3R1,MAPK1,MAPK9,MAPK13
5_Member	KEGG Pathway	hsa04622	RIG-I-like receptor signaling pathway	-3.16304	-1.13427	6/70	843,1432,5601,5603,7706,10010	CASP10,MAPK14,MAPK9,MAPK13,TRIM25,TANK
5_Member	KEGG Pathway	ko04622	RIG-I-like receptor signaling pathway	-3.16304	-1.13427	6/70	843,1432,5601,5603,7706,10010	CASP10,MAPK14,MAPK9,MAPK13,TRIM25,TANK
5_Member	KEGG Pathway	ko04917	Prolactin signaling pathway	-3.16304	-1.13427	6/70	1432,5295,5594,5601,5603,5618	MAPK14,PIK3R1,MAPK1,MAPK9,MAPK13,PRLR
5_Member	WikiPathways	WP4767	FGFR3 signaling in chondrocyte proliferation and terminal differentiation	-3.1549	-1.13165	4/27	1432,2254,5594,5603	MAPK14,FGF9,MAPK1,MAPK13
5_Member	WikiPathways	WP23	B cell receptor signaling pathway	-3.12339	-1.10803	7/98	1432,2308,4690,5295,5594,5601,5879	MAPK14,FOXO1,NCK1,PIK3R1,MAPK1,MAPK9,RAC1
5_Member	Reactome Gene Sets	R-HSA-448424	Interleukin-17 signaling	-3.09795	-1.09725	6/72	1432,4205,5594,5601,55540,257397	MAPK14,MEF2A,MAPK1,MAPK9,IL17RB,TAB3
5_Member	KEGG Pathway	ko05231	Choline metabolism in cancer	-3.09716	-1.09725	7/99	5295,5594,5601,5879,8605,8611,8936	PIK3R1,MAPK1,MAPK9,RAC1,PLA2G4C,PLPP1,WASF1
5_Member	Reactome Gene Sets	R-HSA-171007	p38MAPK events	-3.05048	-1.07794	3/13	1432,5603,5898	MAPK14,MAPK13,RALA
5_Member	WikiPathways	WP2643	Nanoparticle-mediated activation of receptor signaling	-3.0339	-1.07531	4/29	1432,5594,5601,5603	MAPK14,MAPK1,MAPK9,MAPK13
5_Member	KEGG Pathway	ko04024	cAMP signaling pathway	-3.02009	-1.06662	10/198	113,478,490,2892,5295,5594,5601,5879,5906,51196	ADCY7,ATP1A3,ATP2B1,GRIA3,PIK3R1,MAPK1,MAPK9,RAC1,RAP1A,PLCE1
5_Member	WikiPathways	WP2034	Leptin signaling pathway	-2.97411	-1.04053	6/76	1073,1432,2308,5295,5594,5879	CFL2,MAPK14,FOXO1,PIK3R1,MAPK1,RAC1
5_Member	WikiPathways	WP2037	Prolactin signaling pathway	-2.97411	-1.04053	6/76	1432,5295,5594,5601,5618,5879	MAPK14,PIK3R1,MAPK1,MAPK9,PRLR,RAC1
5_Member	KEGG Pathway	hsa04917	Prolactin signaling pathway	-2.97411	-1.04053	6/76	1432,5295,5594,5601,5603,5618	MAPK14,PIK3R1,MAPK1,MAPK9,MAPK13,PRLR
5_Member	WikiPathways	WP75	Toll-like receptor signaling pathway	-2.97079	-1.04044	7/104	1432,5295,5594,5601,5603,5879,257397	MAPK14,PIK3R1,MAPK1,MAPK9,MAPK13,RAC1,TAB3
5_Member	Reactome Gene Sets	R-HSA-166016	Toll Like Receptor 4 (TLR4) Cascade	-2.95746	-1.03299	8/135	1432,4205,5594,5601,10010,11213,26052,257397	MAPK14,MEF2A,MAPK1,MAPK9,TANK,IRAK3,DNM3,TAB3
5_Member	Canonical Pathways	M164	PID ERBB1 DOWNSTREAM PATHWAY	-2.94643	-1.03188	7/105	5295,5594,5601,5879,5898,7529,10006	PIK3R1,MAPK1,MAPK9,RAC1,RALA,YWHAB,ABI1
5_Member	KEGG Pathway	hsa05160	Hepatitis C	-2.93075	-1.02879	9/169	355,1366,1432,5295,5594,5601,5603,7529,10010	FAS,CLDN7,MAPK14,PIK3R1,MAPK1,MAPK9,MAPK13,YWHAB,TANK
5_Member	Canonical Pathways	M193	PID NEPHRIN NEPH1 PATHWAY	-2.92215	-1.02879	4/31	4690,5295,5601,5879	NCK1,PIK3R1,MAPK9,RAC1
5_Member	Canonical Pathways	M63	PID AVB3 OPN PATHWAY	-2.92215	-1.02879	4/31	4313,5295,5594,5879	MMP2,PIK3R1,MAPK1,RAC1
5_Member	Reactome Gene Sets	R-HSA-450282	MAPK targets/ Nuclear events mediated by MAP kinases	-2.92215	-1.02879	4/31	1432,4205,5594,5601	MAPK14,MEF2A,MAPK1,MAPK9
5_Member	KEGG Pathway	hsa05231	Choline metabolism in cancer	-2.89858	-1.01151	7/107	5295,5594,5601,5879,8605,8611,8936	PIK3R1,MAPK1,MAPK9,RAC1,PLA2G4C,PLPP1,WASF1
5_Member	KEGG Pathway	hsa04210	Apoptosis	-2.89609	-1.01151	8/138	143,355,843,1508,1520,5295,5594,5601	PARP4,FAS,CASP10,CTSB,CTSS,PIK3R1,MAPK1,MAPK9
5_Member	KEGG Pathway	ko04210	Apoptosis	-2.89609	-1.01151	8/138	143,355,843,1508,1520,5295,5594,5601	PARP4,FAS,CASP10,CTSB,CTSS,PIK3R1,MAPK1,MAPK9
5_Member	WikiPathways	WP4538	Regulatory circuits of the STAT3 signaling pathway	-2.88634	-1.00319	6/79	1432,5594,5601,5603,53833,58985	MAPK14,MAPK1,MAPK9,MAPK13,IL20RB,IL22RA1
5_Member	Canonical Pathways	M278	PID RAC1 PATHWAY	-2.8668	-0.997999	5/54	1432,5601,5879,8936,10006	MAPK14,MAPK9,RAC1,WASF1,ABI1
5_Member	WikiPathways	WP2018	RANKL/RANK signaling pathway	-2.83079	-0.974227	5/55	1432,5295,5594,5601,5879	MAPK14,PIK3R1,MAPK1,MAPK9,RAC1
5_Member	WikiPathways	WP382	MAPK signaling pathway	-2.79542	-0.946925	11/249	355,1432,2254,5594,5601,5603,5879,5906,8605,8913,9448	FAS,MAPK14,FGF9,MAPK1,MAPK9,MAPK13,RAC1,RAP1A,PLA2G4C,CACNA1G,MAP4K4
5_Member	KEGG Pathway	hsa05161	Hepatitis B	-2.79148	-0.94432	9/177	355,843,1432,5295,5594,5601,5603,6778,7529	FAS,CASP10,MAPK14,PIK3R1,MAPK1,MAPK9,MAPK13,STAT6,YWHAB
5_Member	Reactome Gene Sets	R-HSA-168643	Nucleotide-binding domain, leucine rich repeat containing receptor (NLR) signaling pathways	-2.76104	-0.926963	5/57	1432,5603,9051,22861,257397	MAPK14,MAPK13,PSTPIP1,NLRP1,TAB3
5_Member	WikiPathways	WP1449	Regulation of toll-like receptor signaling pathway	-2.75946	-0.92667	8/145	1432,5295,5594,5601,5603,5879,11213,257397	MAPK14,PIK3R1,MAPK1,MAPK9,MAPK13,RAC1,IRAK3,TAB3
5_Member	WikiPathways	WP244	Alpha 6 beta 4 signaling pathway	-2.72173	-0.899101	4/35	1432,5295,5594,5879	MAPK14,PIK3R1,MAPK1,RAC1
5_Member	KEGG Pathway	hsa04010	MAPK signaling pathway	-2.71419	-0.89406	11/255	355,1432,2254,5594,5601,5603,5879,5906,8605,8913,9448	FAS,MAPK14,FGF9,MAPK1,MAPK9,MAPK13,RAC1,RAP1A,PLA2G4C,CACNA1G,MAP4K4
5_Member	KEGG Pathway	ko04010	MAPK signaling pathway	-2.71419	-0.89406	11/255	355,1432,2254,5594,5601,5603,5879,5906,8605,8913,9448	FAS,MAPK14,FGF9,MAPK1,MAPK9,MAPK13,RAC1,RAP1A,PLA2G4C,CACNA1G,MAP4K4
5_Member	WikiPathways	WP4205	MET in type 1 papillary renal cell carcinoma	-2.69417	-0.884907	5/59	5295,5594,5879,5906,6801	PIK3R1,MAPK1,RAC1,RAP1A,STRN
5_Member	WikiPathways	WP4542	Overview of leukocyte-intrinsic Hippo pathway functions	-2.67576	-0.872339	4/36	1432,2308,5879,5906	MAPK14,FOXO1,RAC1,RAP1A
5_Member	WikiPathways	WP4877	Host-pathogen interaction of human coronaviruses - MAPK signaling	-2.67576	-0.872339	4/36	1432,5594,5601,5603	MAPK14,MAPK1,MAPK9,MAPK13
5_Member	KEGG Pathway	hsa04014	Ras signaling pathway	-2.66156	-0.863334	11/259	2254,5295,5594,5601,5879,5898,5906,8605,10681,51196,54331	FGF9,PIK3R1,MAPK1,MAPK9,RAC1,RALA,RAP1A,PLA2G4C,GNB5,PLCE1,GNG2
5_Member	KEGG Pathway	hsa04024	cAMP signaling pathway	-2.59465	-0.815007	10/226	113,478,490,2892,5295,5594,5601,5879,5906,51196	ADCY7,ATP1A3,ATP2B1,GRIA3,PIK3R1,MAPK1,MAPK9,RAC1,RAP1A,PLCE1
5_Member	Canonical Pathways	M13	PID ERBB4 PATHWAY	-2.58813	-0.809615	4/38	5295,5594,5618,11059	PIK3R1,MAPK1,PRLR,WWP1
5_Member	Canonical Pathways	M10	PID BCR 5PATHWAY	-2.56826	-0.79948	5/63	971,1432,5295,5594,5879	CD72,MAPK14,PIK3R1,MAPK1,RAC1
5_Member	KEGG Pathway	hsa04919	thyroid hormone signaling pathway	-2.55286	-0.792431	7/123	478,2308,5295,5594,8850,9282,51196	ATP1A3,FOXO1,PIK3R1,MAPK1,KAT2B,MED14,PLCE1
5_Member	Reactome Gene Sets	R-HSA-450294	MAP kinase activation	-2.53828	-0.79081	5/64	1432,4205,5594,5601,257397	MAPK14,MEF2A,MAPK1,MAPK9,TAB3
5_Member	KEGG Pathway	hsa05212	Pancreatic cancer	-2.53828	-0.79081	5/64	5295,5594,5601,5879,5898	PIK3R1,MAPK1,MAPK9,RAC1,RALA
5_Member	KEGG Pathway	ko05212	Pancreatic cancer	-2.53828	-0.79081	5/64	5295,5594,5601,5879,5898	PIK3R1,MAPK1,MAPK9,RAC1,RALA
5_Member	Canonical Pathways	M15	PID LYSOPHOSPHOLIPID PATHWAY	-2.50888	-0.766521	5/65	113,4313,5295,5879,54331	ADCY7,MMP2,PIK3R1,RAC1,GNG2
5_Member	KEGG Pathway	hsa05200	Pathways in cancer	-2.50339	-0.766521	14/395	113,355,2254,2308,3910,4313,5295,5594,5601,5879,5898,8031,10681,54331	ADCY7,FAS,FGF9,FOXO1,LAMA4,MMP2,PIK3R1,MAPK1,MAPK9,RAC1,RALA,NCOA4,GNB5,GNG2
5_Member	Reactome Gene Sets	R-HSA-168164	Toll Like Receptor 3 (TLR3) Cascade	-2.50199	-0.766521	6/94	1432,4205,5594,5601,10010,257397	MAPK14,MEF2A,MAPK1,MAPK9,TANK,TAB3
5_Member	Reactome Gene Sets	R-HSA-167044	Signalling to RAS	-2.48422	-0.756758	3/20	1432,5603,5898	MAPK14,MAPK13,RALA
5_Member	WikiPathways	WP481	Insulin signaling	-2.47769	-0.756339	8/161	1432,2308,5295,5594,5601,5603,5879,9448	MAPK14,FOXO1,PIK3R1,MAPK1,MAPK9,MAPK13,RAC1,MAP4K4
5_Member	WikiPathways	WP2036	TNF-related weak inducer of apoptosis (TWEAK) signaling pathway	-2.428	-0.729759	4/42	1432,5594,5601,5879	MAPK14,MAPK1,MAPK9,RAC1
5_Member	WikiPathways	WP2032	Thyroid stimulating hormone (TSH) signaling pathway	-2.42386	-0.729759	5/68	1432,5295,5594,5906,54331	MAPK14,PIK3R1,MAPK1,RAP1A,GNG2
5_Member	KEGG Pathway	hsa05120	Epithelial cell signaling in Helicobacter pylori infection	-2.42386	-0.729759	5/68	102,1432,5601,5603,5879	ADAM10,MAPK14,MAPK9,MAPK13,RAC1
5_Member	KEGG Pathway	ko05120	Epithelial cell signaling in Helicobacter pylori infection	-2.42386	-0.729759	5/68	102,1432,5601,5603,5879	ADAM10,MAPK14,MAPK9,MAPK13,RAC1
5_Member	Canonical Pathways	M103	PID S1P S1P1 PATHWAY	-2.42215	-0.729759	3/21	1901,5594,5879	S1PR1,MAPK1,RAC1
5_Member	WikiPathways	WP3929	Chemokine signaling pathway	-2.41311	-0.723503	8/165	113,5295,5594,5879,5906,10681,54331,56477	ADCY7,PIK3R1,MAPK1,RAC1,RAP1A,GNB5,GNG2,CCL28
5_Member	GO Biological Processes	GO:0051403	stress-activated MAPK cascade	-2.40899	-0.7203	10/240	355,677,1432,2308,5594,5601,5603,6423,9448,222166	FAS,ZFP36L1,MAPK14,FOXO1,MAPK1,MAPK9,MAPK13,SFRP2,MAP4K4,MTURN
5_Member	Canonical Pathways	M222	PID CXCR3 PATHWAY	-2.39076	-0.710452	4/43	1432,5295,5594,54331	MAPK14,PIK3R1,MAPK1,GNG2
5_Member	Reactome Gene Sets	R-HSA-166166	MyD88-independent TLR4 cascade	-2.39069	-0.710452	6/99	1432,4205,5594,5601,10010,257397	MAPK14,MEF2A,MAPK1,MAPK9,TANK,TAB3
5_Member	Reactome Gene Sets	R-HSA-937061	TRIF(TICAM1)-mediated TLR4 signaling	-2.39069	-0.710452	6/99	1432,4205,5594,5601,10010,257397	MAPK14,MEF2A,MAPK1,MAPK9,TANK,TAB3
5_Member	WikiPathways	WP3915	Angiopoietin-like protein 8 regulatory pathway	-2.38311	-0.705345	7/132	1432,2308,5295,5594,5601,5603,9448	MAPK14,FOXO1,PIK3R1,MAPK1,MAPK9,MAPK13,MAP4K4
5_Member	Canonical Pathways	M81	PID CDC42 PATHWAY	-2.3697	-0.69778	5/70	1432,5295,5594,5601,5879	MAPK14,PIK3R1,MAPK1,MAPK9,RAC1
5_Member	Reactome Gene Sets	R-HSA-198753	ERK/MAPK targets	-2.36336	-0.697132	3/22	1432,4205,5594	MAPK14,MEF2A,MAPK1
5_Member	Canonical Pathways	M175	PID ERBB2 ERBB3 PATHWAY	-2.35453	-0.691786	4/44	5295,5594,5601,5879	PIK3R1,MAPK1,MAPK9,RAC1
5_Member	Reactome Gene Sets	R-HSA-166058	MyD88:MAL(TIRAP) cascade initiated on plasma membrane	-2.34817	-0.688177	6/101	1432,4205,5594,5601,11213,257397	MAPK14,MEF2A,MAPK1,MAPK9,IRAK3,TAB3
5_Member	Reactome Gene Sets	R-HSA-168188	Toll Like Receptor TLR6:TLR2 Cascade	-2.34817	-0.688177	6/101	1432,4205,5594,5601,11213,257397	MAPK14,MEF2A,MAPK1,MAPK9,IRAK3,TAB3
5_Member	WikiPathways	WP4341	Non-genomic actions of 1,25 dihydroxyvitamin D3	-2.34332	-0.684906	5/71	1432,5594,5601,5603,51196	MAPK14,MAPK1,MAPK9,MAPK13,PLCE1
5_Member	KEGG Pathway	ko05142	Chagas disease (American trypanosomiasis)	-2.3273	-0.669746	6/102	355,1432,5295,5594,5601,5603	FAS,MAPK14,PIK3R1,MAPK1,MAPK9,MAPK13
5_Member	GO Biological Processes	GO:0031098	stress-activated protein kinase signaling cascade	-2.30984	-0.662667	10/248	355,677,1432,2308,5594,5601,5603,6423,9448,222166	FAS,ZFP36L1,MAPK14,FOXO1,MAPK1,MAPK9,MAPK13,SFRP2,MAP4K4,MTURN
5_Member	WikiPathways	WP712	Estrogen signaling pathway	-2.30753	-0.662667	3/23	1432,5594,5601	MAPK14,MAPK1,MAPK9
5_Member	KEGG Pathway	hsa04660	T cell receptor signaling pathway	-2.3067	-0.662667	6/103	1432,4690,5295,5594,5601,5603	MAPK14,NCK1,PIK3R1,MAPK1,MAPK9,MAPK13
5_Member	KEGG Pathway	ko04660	T cell receptor signaling pathway	-2.3067	-0.662667	6/103	1432,4690,5295,5594,5601,5603	MAPK14,NCK1,PIK3R1,MAPK1,MAPK9,MAPK13
5_Member	KEGG Pathway	hsa04068	foxo signaling pathway	-2.29529	-0.654567	7/137	1432,1901,2308,5295,5594,5601,5603	MAPK14,S1PR1,FOXO1,PIK3R1,MAPK1,MAPK9,MAPK13
5_Member	Reactome Gene Sets	R-HSA-168179	Toll Like Receptor TLR1:TLR2 Cascade	-2.28636	-0.653297	6/104	1432,4205,5594,5601,11213,257397	MAPK14,MEF2A,MAPK1,MAPK9,IRAK3,TAB3
5_Member	Reactome Gene Sets	R-HSA-181438	Toll Like Receptor 2 (TLR2) Cascade	-2.28636	-0.653297	6/104	1432,4205,5594,5601,11213,257397	MAPK14,MEF2A,MAPK1,MAPK9,IRAK3,TAB3
5_Member	KEGG Pathway	hsa04620	Toll-like receptor signaling pathway	-2.28636	-0.653297	6/104	1432,5295,5594,5601,5603,5879	MAPK14,PIK3R1,MAPK1,MAPK9,MAPK13,RAC1
5_Member	KEGG Pathway	ko04620	Toll-like receptor signaling pathway	-2.28636	-0.653297	6/104	1432,5295,5594,5601,5603,5879	MAPK14,PIK3R1,MAPK1,MAPK9,MAPK13,RAC1
5_Member	KEGG Pathway	hsa04930	Type II diabetes mellitus	-2.2849	-0.653297	4/46	5295,5594,5601,8913	PIK3R1,MAPK1,MAPK9,CACNA1G
5_Member	KEGG Pathway	ko04930	Type II diabetes mellitus	-2.2849	-0.653297	4/46	5295,5594,5601,8913	PIK3R1,MAPK1,MAPK9,CACNA1G
5_Member	KEGG Pathway	hsa04380	Osteoclast differentiation	-2.27824	-0.648926	7/138	1432,5295,5594,5601,5603,5879,10010	MAPK14,PIK3R1,MAPK1,MAPK9,MAPK13,RAC1,TANK
5_Member	Canonical Pathways	M268	PID S1P S1P2 PATHWAY	-2.25441	-0.637899	3/24	1432,5594,5879	MAPK14,MAPK1,RAC1
5_Member	Reactome Gene Sets	R-HSA-5668599	RHO GTPases Activate NADPH Oxidases	-2.25441	-0.637899	3/24	1432,5594,5879	MAPK14,MAPK1,RAC1
5_Member	Canonical Pathways	M183	PID IL6 7 PATHWAY	-2.25142	-0.637899	4/47	1432,2308,5295,5879	MAPK14,FOXO1,PIK3R1,RAC1
5_Member	WikiPathways	WP2203	Thymic stromal lymphopoietin (TSLP) signaling pathway	-2.25142	-0.637899	4/47	1432,5594,5601,6778	MAPK14,MAPK1,MAPK9,STAT6
5_Member	Reactome Gene Sets	R-HSA-6811558	PI5P, PP2A and IER3 Regulate PI3K/AKT Signaling	-2.24643	-0.635744	6/106	2254,3556,5295,5594,5879,6801	FGF9,IL1RAP,PIK3R1,MAPK1,RAC1,STRN
5_Member	KEGG Pathway	hsa05142	Chagas disease (American trypanosomiasis)	-2.22682	-0.623091	6/107	355,1432,5295,5594,5601,5603	FAS,MAPK14,PIK3R1,MAPK1,MAPK9,MAPK13
5_Member	KEGG Pathway	ko04659	Th17 cell differentiation	-2.22682	-0.623091	6/107	1432,3556,5594,5601,5603,6778	MAPK14,IL1RAP,MAPK1,MAPK9,MAPK13,STAT6
5_Member	WikiPathways	WP4566	Translation inhibitors in chronically activated PDGFRA cells	-2.21878	-0.618246	4/48	1432,5295,5594,5601	MAPK14,PIK3R1,MAPK1,MAPK9
5_Member	WikiPathways	WP1528	Physiological and pathological hypertrophy of the heart	-2.20376	-0.612167	3/25	1432,5594,5879	MAPK14,MAPK1,RAC1
5_Member	KEGG Pathway	hsa04062	Chemokine signaling pathway	-2.16107	-0.579674	8/182	113,5295,5594,5879,5906,10681,54331,56477	ADCY7,PIK3R1,MAPK1,RAC1,RAP1A,GNB5,GNG2,CCL28
5_Member	KEGG Pathway	ko04062	Chemokine signaling pathway	-2.16107	-0.579674	8/182	113,5295,5594,5879,5906,10681,54331,56477	ADCY7,PIK3R1,MAPK1,RAC1,RAP1A,GNB5,GNG2,CCL28
5_Member	Canonical Pathways	M226	PID VEGFR1 PATHWAY	-2.15538	-0.578998	3/26	4690,5295,5594	NCK1,PIK3R1,MAPK1
5_Member	KEGG Pathway	hsa04659	Th17 cell differentiation	-2.13227	-0.560849	6/112	1432,3556,5594,5601,5603,6778	MAPK14,IL1RAP,MAPK1,MAPK9,MAPK13,STAT6
5_Member	Canonical Pathways	M7955	SIG INSULIN RECEPTOR PATHWAY IN CARDIAC MYOCYTES	-2.12554	-0.557619	4/51	2308,5295,5594,7529	FOXO1,PIK3R1,MAPK1,YWHAB
5_Member	WikiPathways	WP3611	Photodynamic therapy-induced AP-1 survival signaling.	-2.12554	-0.557619	4/51	355,1432,4313,5603	FAS,MAPK14,MMP2,MAPK13
5_Member	Reactome Gene Sets	R-HSA-199418	Negative regulation of the PI3K/AKT network	-2.11403	-0.548892	6/113	2254,3556,5295,5594,5879,6801	FGF9,IL1RAP,PIK3R1,MAPK1,RAC1,STRN
5_Member	Canonical Pathways	M1718	SIG IL4RECEPTOR IN B LYPHOCYTES	-2.10908	-0.547403	3/27	5295,5594,6778	PIK3R1,MAPK1,STAT6
5_Member	WikiPathways	WP2035	Follicle stimulating hormone (FSH) signaling pathway	-2.10908	-0.547403	3/27	1432,2308,5594	MAPK14,FOXO1,MAPK1
5_Member	WikiPathways	WP4659	Gastrin signaling pathway	-2.09599	-0.538343	6/114	1432,2308,5295,5594,5601,5879	MAPK14,FOXO1,PIK3R1,MAPK1,MAPK9,RAC1
5_Member	Canonical Pathways	M115	PID REG GR PATHWAY	-2.08061	-0.525758	5/82	1432,2908,5087,5594,5601	MAPK14,NR3C1,PBX1,MAPK1,MAPK9
5_Member	KEGG Pathway	hsa04725	Cholinergic synapse	-2.07816	-0.523991	6/115	113,3786,5295,5594,10681,54331	ADCY7,KCNQ3,PIK3R1,MAPK1,GNB5,GNG2
5_Member	Canonical Pathways	M79	PID TRAIL PATHWAY	-2.06472	-0.519913	3/28	843,5295,5594	CASP10,PIK3R1,MAPK1
5_Member	KEGG Pathway	hsa05152	Tuberculosis	-2.0278	-0.492304	8/192	843,1432,1520,1962,5594,5601,5603,22925	CASP10,MAPK14,CTSS,EHHADH,MAPK1,MAPK9,MAPK13,PLA2R1
5_Member	Canonical Pathways	M55	PID S1P S1P3 PATHWAY	-2.02214	-0.492304	3/29	1901,5594,5879	S1PR1,MAPK1,RAC1
5_Member	Reactome Gene Sets	R-HSA-168142	Toll Like Receptor 10 (TLR10) Cascade	-2.01658	-0.489928	5/85	1432,4205,5594,5601,257397	MAPK14,MEF2A,MAPK1,MAPK9,TAB3
5_Member	Reactome Gene Sets	R-HSA-168176	Toll Like Receptor 5 (TLR5) Cascade	-2.01658	-0.489928	5/85	1432,4205,5594,5601,257397	MAPK14,MEF2A,MAPK1,MAPK9,TAB3
5_Member	Reactome Gene Sets	R-HSA-975871	MyD88 cascade initiated on plasma membrane	-2.01658	-0.489928	5/85	1432,4205,5594,5601,257397	MAPK14,MEF2A,MAPK1,MAPK9,TAB3
5_Member	Canonical Pathways	M122	PID IL2 1PATHWAY	-2.01101	-0.487519	4/55	1432,5295,5594,5601	MAPK14,PIK3R1,MAPK1,MAPK9
5_Member	WikiPathways	WP395	IL-4 signaling pathway	-2.01101	-0.487519	4/55	1432,5295,5594,6778	MAPK14,PIK3R1,MAPK1,STAT6
6_Summary	GO Biological Processes	GO:0008610	lipid biosynthetic process	-5.96695	-2.60524	29/693	220,3628,3990,5066,5087,5166,5295,5618,5740,8605,8611,8644,8867,9104,9453,10558,23683,26031,50640,51170,51196,51302,51703,55294,57217,84188,84668,259230,375298,1646,1962,3030,5244,9282,11010,22925,51552,79611,80765,83850,5168,27163,113,5028,5594,50484,50808	ALDH1A3,INPP1,LIPC,PAM,PBX1,PDK4,PIK3R1,PRLR,PTGIS,PLA2G4C,PLPP1,AKR1C3,SYNJ1,RGN,GGPS1,SPTLC1,PRKD3,OSBPL3,PNPLA8,HSD17B11,PLCE1,CYP39A1,ACSL5,FBXW7,TTC7A,FAR1,FAM126A,SGMS1,CERKL,AKR1C2,EHHADH,HADHA,ABCB4,MED14,GLIPR1,PLA2R1,RAB14,ACSS3,STARD5,ESYT3,ENPP2,NAAA,ADCY7,P2RY1,MAPK1,RRM2B,AK3
6_Member	GO Biological Processes	GO:0008610	lipid biosynthetic process	-5.96695	-2.60524	29/693	220,3628,3990,5066,5087,5166,5295,5618,5740,8605,8611,8644,8867,9104,9453,10558,23683,26031,50640,51170,51196,51302,51703,55294,57217,84188,84668,259230,375298	ALDH1A3,INPP1,LIPC,PAM,PBX1,PDK4,PIK3R1,PRLR,PTGIS,PLA2G4C,PLPP1,AKR1C3,SYNJ1,RGN,GGPS1,SPTLC1,PRKD3,OSBPL3,PNPLA8,HSD17B11,PLCE1,CYP39A1,ACSL5,FBXW7,TTC7A,FAR1,FAM126A,SGMS1,CERKL
6_Member	Reactome Gene Sets	R-HSA-556833	Metabolism of lipids	-4.52813	-1.82562	27/740	1646,1962,3030,5244,5295,5740,8605,8611,8644,8867,9282,9453,10558,11010,22925,23683,26031,50640,51170,51302,51552,51703,79611,80765,83850,84188,259230	AKR1C2,EHHADH,HADHA,ABCB4,PIK3R1,PTGIS,PLA2G4C,PLPP1,AKR1C3,SYNJ1,MED14,GGPS1,SPTLC1,GLIPR1,PLA2R1,PRKD3,OSBPL3,PNPLA8,HSD17B11,CYP39A1,RAB14,ACSL5,ACSS3,STARD5,ESYT3,FAR1,SGMS1
6_Member	GO Biological Processes	GO:0006644	phospholipid metabolic process	-3.05657	-1.07794	15/384	3030,3628,3990,5168,5295,8605,8611,8867,9453,27163,50640,57217,84188,84668,259230	HADHA,INPP1,LIPC,ENPP2,PIK3R1,PLA2G4C,PLPP1,SYNJ1,GGPS1,NAAA,PNPLA8,TTC7A,FAR1,FAM126A,SGMS1
6_Member	GO Biological Processes	GO:0046486	glycerolipid metabolic process	-2.96712	-1.03838	15/392	3030,3628,3990,5168,5295,8605,8867,9104,27163,50640,51196,55294,57217,84188,84668	HADHA,INPP1,LIPC,ENPP2,PIK3R1,PLA2G4C,SYNJ1,RGN,NAAA,PNPLA8,PLCE1,FBXW7,TTC7A,FAR1,FAM126A
6_Member	GO Biological Processes	GO:0006650	glycerophospholipid metabolic process	-2.5679	-0.79948	12/306	3030,3628,3990,5168,5295,8605,8867,27163,50640,57217,84188,84668	HADHA,INPP1,LIPC,ENPP2,PIK3R1,PLA2G4C,SYNJ1,NAAA,PNPLA8,TTC7A,FAR1,FAM126A
6_Member	GO Biological Processes	GO:0046854	phosphatidylinositol phosphate biosynthetic process	-2.53828	-0.79081	5/64	3628,5295,8867,57217,84668	INPP1,PIK3R1,SYNJ1,TTC7A,FAM126A
6_Member	GO Biological Processes	GO:0090407	organophosphate biosynthetic process	-2.32187	-0.666881	17/549	113,3628,5028,5166,5295,5594,5740,8605,8867,9453,50484,50808,51703,57217,84188,84668,259230	ADCY7,INPP1,P2RY1,PDK4,PIK3R1,MAPK1,PTGIS,PLA2G4C,SYNJ1,GGPS1,RRM2B,AK3,ACSL5,TTC7A,FAR1,FAM126A,SGMS1
6_Member	GO Biological Processes	GO:0045017	glycerolipid biosynthetic process	-2.26202	-0.637899	10/252	3628,5295,8605,8867,9104,51196,55294,57217,84188,84668	INPP1,PIK3R1,PLA2G4C,SYNJ1,RGN,PLCE1,FBXW7,TTC7A,FAR1,FAM126A
7_Summary	GO Biological Processes	GO:0001953	negative regulation of cell-matrix adhesion	-5.59047	-2.31453	7/41	94,347,4321,4653,5295,9448,11170,102,567,1432,1803,1901,2796,3676,3910,4690,5879,6423,9404,10630,25975,28984,53833,54518,56477,65125,79872,84830,151887,9341,10516,11149,84168,1073,4205,29767,221692,3556,5906,55737,1366,6780,6801,8650,8936,23114,26052,79987	ACVRL1,APOD,MMP12,MYOC,PIK3R1,MAP4K4,FAM107A,ADAM10,B2M,MAPK14,DPP4,S1PR1,GNRH1,ITGA4,LAMA4,NCK1,RAC1,SFRP2,LPXN,PDPN,EGFL6,RGCC,IL20RB,APBB1IP,CCL28,WNK1,CBLL1,ADTRP,CCDC80,VAMP3,FBLN5,BVES,ANTXR1,CFL2,MEF2A,TMOD2,PHACTR1,IL1RAP,RAP1A,VPS35,CLDN7,STAU1,STRN,NUMB,WASF1,NFASC,DNM3,SVEP1
7_Member	GO Biological Processes	GO:0001953	negative regulation of cell-matrix adhesion	-5.59047	-2.31453	7/41	94,347,4321,4653,5295,9448,11170	ACVRL1,APOD,MMP12,MYOC,PIK3R1,MAP4K4,FAM107A
7_Member	GO Biological Processes	GO:0030155	regulation of cell adhesion	-5.28512	-2.22444	29/751	94,102,347,567,1432,1803,1901,2796,3676,3910,4321,4653,4690,5295,5879,6423,9404,9448,10630,11170,25975,28984,53833,54518,56477,65125,79872,84830,151887	ACVRL1,ADAM10,APOD,B2M,MAPK14,DPP4,S1PR1,GNRH1,ITGA4,LAMA4,MMP12,MYOC,NCK1,PIK3R1,RAC1,SFRP2,LPXN,MAP4K4,PDPN,FAM107A,EGFL6,RGCC,IL20RB,APBB1IP,CCL28,WNK1,CBLL1,ADTRP,CCDC80
7_Member	GO Biological Processes	GO:0031589	cell-substrate adhesion	-4.85841	-1.94206	18/364	94,347,3676,4321,4653,5295,5879,9341,9404,9448,10516,10630,11149,11170,25975,56477,84168,151887	ACVRL1,APOD,ITGA4,MMP12,MYOC,PIK3R1,RAC1,VAMP3,LPXN,MAP4K4,FBLN5,PDPN,BVES,FAM107A,EGFL6,CCL28,ANTXR1,CCDC80
7_Member	GO Biological Processes	GO:0007162	negative regulation of cell adhesion	-4.72847	-1.88527	16/303	94,102,347,2796,4321,4653,5295,9404,9448,11170,28984,53833,56477,65125,79872,84830	ACVRL1,ADAM10,APOD,GNRH1,MMP12,MYOC,PIK3R1,LPXN,MAP4K4,FAM107A,RGCC,IL20RB,CCL28,WNK1,CBLL1,ADTRP
7_Member	GO Biological Processes	GO:0034446	substrate adhesion-dependent cell spreading	-4.38413	-1.80353	9/108	3676,4653,5295,5879,9341,9404,10630,11149,84168	ITGA4,MYOC,PIK3R1,RAC1,VAMP3,LPXN,PDPN,BVES,ANTXR1
7_Member	GO Biological Processes	GO:0010812	negative regulation of cell-substrate adhesion	-4.10883	-1.68275	7/68	94,347,4321,4653,5295,9448,11170	ACVRL1,APOD,MMP12,MYOC,PIK3R1,MAP4K4,FAM107A
7_Member	GO Biological Processes	GO:0150116	regulation of cell-substrate junction organization	-3.98848	-1.62829	7/71	94,347,4653,5295,5879,9448,11170	ACVRL1,APOD,MYOC,PIK3R1,RAC1,MAP4K4,FAM107A
7_Member	GO Biological Processes	GO:0001952	regulation of cell-matrix adhesion	-3.81185	-1.52203	9/128	94,347,4321,4653,5295,5879,9448,11170,56477	ACVRL1,APOD,MMP12,MYOC,PIK3R1,RAC1,MAP4K4,FAM107A,CCL28
7_Member	GO Biological Processes	GO:0010810	regulation of cell-substrate adhesion	-3.80326	-1.52074	12/221	94,347,4321,4653,5295,5879,9448,10630,11170,25975,56477,151887	ACVRL1,APOD,MMP12,MYOC,PIK3R1,RAC1,MAP4K4,PDPN,FAM107A,EGFL6,CCL28,CCDC80
7_Member	GO Biological Processes	GO:0051893	regulation of focal adhesion assembly	-3.30023	-1.20569	6/66	94,347,4653,5879,9448,11170	ACVRL1,APOD,MYOC,RAC1,MAP4K4,FAM107A
7_Member	GO Biological Processes	GO:0090109	regulation of cell-substrate junction assembly	-3.30023	-1.20569	6/66	94,347,4653,5879,9448,11170	ACVRL1,APOD,MYOC,RAC1,MAP4K4,FAM107A
7_Member	GO Biological Processes	GO:0150115	cell-substrate junction organization	-3.04567	-1.07666	7/101	94,347,4653,5295,5879,9448,11170	ACVRL1,APOD,MYOC,PIK3R1,RAC1,MAP4K4,FAM107A
7_Member	GO Biological Processes	GO:0007160	cell-matrix adhesion	-3.01134	-1.0608	11/234	94,347,3676,4321,4653,5295,5879,9448,10516,11170,56477	ACVRL1,APOD,ITGA4,MMP12,MYOC,PIK3R1,RAC1,MAP4K4,FBLN5,FAM107A,CCL28
7_Member	GO Biological Processes	GO:0150117	positive regulation of cell-substrate junction organization	-2.81843	-0.967262	4/33	4653,5295,5879,9448	MYOC,PIK3R1,RAC1,MAP4K4
7_Member	GO Biological Processes	GO:0048041	focal adhesion assembly	-2.67105	-0.869245	6/87	94,347,4653,5879,9448,11170	ACVRL1,APOD,MYOC,RAC1,MAP4K4,FAM107A
7_Member	GO Biological Processes	GO:0051895	negative regulation of focal adhesion assembly	-2.61966	-0.835441	3/18	94,347,11170	ACVRL1,APOD,FAM107A
7_Member	GO Biological Processes	GO:0150118	negative regulation of cell-substrate junction organization	-2.61966	-0.835441	3/18	94,347,11170	ACVRL1,APOD,FAM107A
7_Member	GO Biological Processes	GO:0007044	cell-substrate junction assembly	-2.47914	-0.756339	6/95	94,347,4653,5879,9448,11170	ACVRL1,APOD,MYOC,RAC1,MAP4K4,FAM107A
7_Member	GO Biological Processes	GO:0031032	actomyosin structure organization	-2.4781	-0.756339	9/197	1073,1901,4205,4653,5295,5879,28984,29767,221692	CFL2,S1PR1,MEF2A,MYOC,PIK3R1,RAC1,RGCC,TMOD2,PHACTR1
7_Member	GO Biological Processes	GO:1901888	regulation of cell junction assembly	-2.37873	-0.703659	9/204	94,347,3556,4653,5879,5906,9448,11170,55737	ACVRL1,APOD,IL1RAP,MYOC,RAC1,RAP1A,MAP4K4,FAM107A,VPS35
7_Member	GO Biological Processes	GO:0034330	cell junction organization	-2.28422	-0.653297	20/695	94,102,347,1366,1432,3556,4653,5295,5879,5906,6780,6801,8650,8936,9448,11170,23114,26052,55737,79987	ACVRL1,ADAM10,APOD,CLDN7,MAPK14,IL1RAP,MYOC,PIK3R1,RAC1,RAP1A,STAU1,STRN,NUMB,WASF1,MAP4K4,FAM107A,NFASC,DNM3,VPS35,SVEP1
7_Member	GO Biological Processes	GO:0030038	contractile actin filament bundle assembly	-2.20746	-0.613645	6/108	1901,4653,5295,5879,28984,221692	S1PR1,MYOC,PIK3R1,RAC1,RGCC,PHACTR1
7_Member	GO Biological Processes	GO:0043149	stress fiber assembly	-2.20746	-0.613645	6/108	1901,4653,5295,5879,28984,221692	S1PR1,MYOC,PIK3R1,RAC1,RGCC,PHACTR1
7_Member	GO Biological Processes	GO:0051894	positive regulation of focal adhesion assembly	-2.06472	-0.519913	3/28	4653,5879,9448	MYOC,RAC1,MAP4K4
8_Summary	Reactome Gene Sets	R-HSA-449147	Signaling by Interleukins	-5.54111	-2.31453	22/462	1432,1901,2308,3556,3598,3603,4128,4205,4313,5295,5306,5594,5601,5898,6778,6935,11213,53833,55540,58480,58985,257397,567,5618,7706	MAPK14,S1PR1,FOXO1,IL1RAP,IL13RA2,IL16,MAOA,MEF2A,MMP2,PIK3R1,PITPNA,MAPK1,MAPK9,RALA,STAT6,ZEB1,IRAK3,IL20RB,IL17RB,RHOU,IL22RA1,TAB3,B2M,PRLR,TRIM25
8_Member	Reactome Gene Sets	R-HSA-449147	Signaling by Interleukins	-5.54111	-2.31453	22/462	1432,1901,2308,3556,3598,3603,4128,4205,4313,5295,5306,5594,5601,5898,6778,6935,11213,53833,55540,58480,58985,257397	MAPK14,S1PR1,FOXO1,IL1RAP,IL13RA2,IL16,MAOA,MEF2A,MMP2,PIK3R1,PITPNA,MAPK1,MAPK9,RALA,STAT6,ZEB1,IRAK3,IL20RB,IL17RB,RHOU,IL22RA1,TAB3
8_Member	Reactome Gene Sets	R-HSA-6785807	Interleukin-4 and Interleukin-13 signaling	-4.38413	-1.80353	9/108	1901,2308,3598,4128,4313,5295,6778,6935,58480	S1PR1,FOXO1,IL13RA2,MAOA,MMP2,PIK3R1,STAT6,ZEB1,RHOU
8_Member	Reactome Gene Sets	R-HSA-1280215	Cytokine Signaling in Immune system	-3.94352	-1.61524	25/715	567,1432,1901,2308,3556,3598,3603,4128,4205,4313,5295,5306,5594,5601,5618,5898,6778,6935,7706,11213,53833,55540,58480,58985,257397	B2M,MAPK14,S1PR1,FOXO1,IL1RAP,IL13RA2,IL16,MAOA,MEF2A,MMP2,PIK3R1,PITPNA,MAPK1,MAPK9,PRLR,RALA,STAT6,ZEB1,TRIM25,IRAK3,IL20RB,IL17RB,RHOU,IL22RA1,TAB3
9_Summary	GO Biological Processes	GO:0051668	localization within membrane	-5.52174	-2.31453	27/651	102,3676,5028,5295,5593,5879,5898,5906,8417,8650,8674,8724,9341,9559,11149,23114,25945,27342,51552,54520,55737,55763,57217,64429,84668,115548,261729	ADAM10,ITGA4,P2RY1,PIK3R1,PRKG2,RAC1,RALA,RAP1A,STX7,NUMB,VAMP4,SNX3,VAMP3,VPS26A,BVES,NFASC,NECTIN3,RABGEF1,RAB14,CCDC93,VPS35,EXOC1,TTC7A,ZDHHC6,FAM126A,FCHO2,STEAP2
9_Member	GO Biological Processes	GO:0051668	localization within membrane	-5.52174	-2.31453	27/651	102,3676,5028,5295,5593,5879,5898,5906,8417,8650,8674,8724,9341,9559,11149,23114,25945,27342,51552,54520,55737,55763,57217,64429,84668,115548,261729	ADAM10,ITGA4,P2RY1,PIK3R1,PRKG2,RAC1,RALA,RAP1A,STX7,NUMB,VAMP4,SNX3,VAMP3,VPS26A,BVES,NFASC,NECTIN3,RABGEF1,RAB14,CCDC93,VPS35,EXOC1,TTC7A,ZDHHC6,FAM126A,FCHO2,STEAP2
9_Member	GO Biological Processes	GO:0072659	protein localization to plasma membrane	-3.86235	-1.55755	14/286	5028,5295,5593,5906,8417,8650,8674,9341,23114,25945,55737,57217,84668,115548	P2RY1,PIK3R1,PRKG2,RAP1A,STX7,NUMB,VAMP4,VAMP3,NFASC,NECTIN3,VPS35,TTC7A,FAM126A,FCHO2
9_Member	GO Biological Processes	GO:1990778	protein localization to cell periphery	-3.67308	-1.44171	15/335	102,5028,5295,5593,5906,8417,8650,8674,9341,23114,25945,55737,57217,84668,115548	ADAM10,P2RY1,PIK3R1,PRKG2,RAP1A,STX7,NUMB,VAMP4,VAMP3,NFASC,NECTIN3,VPS35,TTC7A,FAM126A,FCHO2
9_Member	GO Biological Processes	GO:0072657	protein localization to membrane	-2.48399	-0.756758	18/574	102,3676,5028,5295,5593,5906,8417,8650,8674,9341,23114,25945,27342,55737,57217,64429,84668,115548	ADAM10,ITGA4,P2RY1,PIK3R1,PRKG2,RAP1A,STX7,NUMB,VAMP4,VAMP3,NFASC,NECTIN3,RABGEF1,VPS35,TTC7A,ZDHHC6,FAM126A,FCHO2
10_Summary	Reactome Gene Sets	R-HSA-76002	Platelet activation, signaling and aggregation	-5.50014	-2.31453	16/263	150,308,334,710,1432,2157,5028,5295,5594,5879,5906,10630,10681,54331,54518,135228,490,3676,5593,5673,9371,50808,5066,5618,9341,22875,56603,65125,84830,94,2004,4321,10565,64094,347,677	ADRA2A,ANXA5,APLP2,SERPING1,MAPK14,F8,P2RY1,PIK3R1,MAPK1,RAC1,RAP1A,PDPN,GNB5,GNG2,APBB1IP,CD109,ATP2B1,ITGA4,PRKG2,PSG5,KIF3B,AK3,PAM,PRLR,VAMP3,ENPP4,CYP26B1,WNK1,ADTRP,ACVRL1,ELK3,MMP12,ARFGEF1,SMOC2,APOD,ZFP36L1
10_Member	Reactome Gene Sets	R-HSA-76002	Platelet activation, signaling and aggregation	-5.50014	-2.31453	16/263	150,308,334,710,1432,2157,5028,5295,5594,5879,5906,10630,10681,54331,54518,135228	ADRA2A,ANXA5,APLP2,SERPING1,MAPK14,F8,P2RY1,PIK3R1,MAPK1,RAC1,RAP1A,PDPN,GNB5,GNG2,APBB1IP,CD109
10_Member	Reactome Gene Sets	R-HSA-109582	Hemostasis	-3.61583	-1.39714	22/621	150,308,334,490,710,1432,2157,3676,5028,5295,5593,5594,5673,5879,5906,9371,10630,10681,50808,54331,54518,135228	ADRA2A,ANXA5,APLP2,ATP2B1,SERPING1,MAPK14,F8,ITGA4,P2RY1,PIK3R1,PRKG2,MAPK1,PSG5,RAC1,RAP1A,KIF3B,PDPN,GNB5,AK3,GNG2,APBB1IP,CD109
10_Member	GO Biological Processes	GO:0050878	regulation of body fluid levels	-3.07938	-1.08316	15/382	150,308,710,1432,2157,5028,5066,5618,9341,10630,22875,50808,56603,65125,84830	ADRA2A,ANXA5,SERPING1,MAPK14,F8,P2RY1,PAM,PRLR,VAMP3,PDPN,ENPP4,AK3,CYP26B1,WNK1,ADTRP
10_Member	GO Biological Processes	GO:0042060	wound healing	-3.06414	-1.07794	16/424	94,150,308,710,1432,2004,2157,4321,5028,10565,10630,22875,50808,64094,84830,135228	ACVRL1,ADRA2A,ANXA5,SERPING1,MAPK14,ELK3,F8,MMP12,P2RY1,ARFGEF1,PDPN,ENPP4,AK3,SMOC2,ADTRP,CD109
10_Member	GO Biological Processes	GO:0009611	response to wounding	-3.05127	-1.07794	19/552	94,150,308,347,677,710,1432,2004,2157,4321,5028,5879,10565,10630,22875,50808,64094,84830,135228	ACVRL1,ADRA2A,ANXA5,APOD,ZFP36L1,SERPING1,MAPK14,ELK3,F8,MMP12,P2RY1,RAC1,ARFGEF1,PDPN,ENPP4,AK3,SMOC2,ADTRP,CD109
10_Member	GO Biological Processes	GO:0007596	blood coagulation	-2.70833	-0.890693	10/218	150,308,710,1432,2157,5028,10630,22875,50808,84830	ADRA2A,ANXA5,SERPING1,MAPK14,F8,P2RY1,PDPN,ENPP4,AK3,ADTRP
10_Member	GO Biological Processes	GO:0007599	hemostasis	-2.6366	-0.845437	10/223	150,308,710,1432,2157,5028,10630,22875,50808,84830	ADRA2A,ANXA5,SERPING1,MAPK14,F8,P2RY1,PDPN,ENPP4,AK3,ADTRP
10_Member	GO Biological Processes	GO:0050817	coagulation	-2.6366	-0.845437	10/223	150,308,710,1432,2157,5028,10630,22875,50808,84830	ADRA2A,ANXA5,SERPING1,MAPK14,F8,P2RY1,PDPN,ENPP4,AK3,ADTRP
10_Member	GO Biological Processes	GO:0061041	regulation of wound healing	-2.34746	-0.688177	7/134	150,710,10565,22875,64094,84830,135228	ADRA2A,SERPING1,ARFGEF1,ENPP4,SMOC2,ADTRP,CD109
11_Summary	GO Biological Processes	GO:0001955	blood vessel maturation	-5.45471	-2.29712	4/8	94,1901,4313,8434	ACVRL1,S1PR1,MMP2,RECK
11_Member	GO Biological Processes	GO:0001955	blood vessel maturation	-5.45471	-2.29712	4/8	94,1901,4313,8434	ACVRL1,S1PR1,MMP2,RECK
12_Summary	KEGG Pathway	ko04015	Rap1 signaling pathway	-5.34075	-2.25747	14/210	113,889,1432,2254,5028,5295,5594,5603,5879,5898,5906,23683,51196,54518,7529,5593,8605,4205,26052,102,3910,4690,5241,6778,8936,10006,11059,30011,83464,2908	ADCY7,KRIT1,MAPK14,FGF9,P2RY1,PIK3R1,MAPK1,MAPK13,RAC1,RALA,RAP1A,PRKD3,PLCE1,APBB1IP,YWHAB,PRKG2,PLA2G4C,MEF2A,DNM3,ADAM10,LAMA4,NCK1,PGR,STAT6,WASF1,ABI1,WWP1,SH3KBP1,APH1B,NR3C1
12_Member	KEGG Pathway	ko04015	Rap1 signaling pathway	-5.34075	-2.25747	14/210	113,889,1432,2254,5028,5295,5594,5603,5879,5898,5906,23683,51196,54518	ADCY7,KRIT1,MAPK14,FGF9,P2RY1,PIK3R1,MAPK1,MAPK13,RAC1,RALA,RAP1A,PRKD3,PLCE1,APBB1IP
12_Member	Reactome Gene Sets	R-HSA-187687	Signalling to ERKs	-4.95221	-1.97072	6/34	1432,5594,5603,5898,5906,7529	MAPK14,MAPK1,MAPK13,RALA,RAP1A,YWHAB
12_Member	KEGG Pathway	hsa04015	Rap1 signaling pathway	-4.93238	-1.96861	14/228	113,889,1432,2254,5028,5295,5594,5603,5879,5898,5906,23683,51196,54518	ADCY7,KRIT1,MAPK14,FGF9,P2RY1,PIK3R1,MAPK1,MAPK13,RAC1,RALA,RAP1A,PRKD3,PLCE1,APBB1IP
12_Member	KEGG Pathway	hsa04611	Platelet activation	-4.50609	-1.82562	10/130	113,1432,5028,5295,5593,5594,5603,5906,8605,54518	ADCY7,MAPK14,P2RY1,PIK3R1,PRKG2,MAPK1,MAPK13,RAP1A,PLA2G4C,APBB1IP
12_Member	Reactome Gene Sets	R-HSA-166520	Signaling by NTRKs	-4.39309	-1.80353	10/134	1432,4205,5295,5594,5603,5879,5898,5906,7529,26052	MAPK14,MEF2A,PIK3R1,MAPK1,MAPK13,RAC1,RALA,RAP1A,YWHAB,DNM3
12_Member	Reactome Gene Sets	R-HSA-9006934	Signaling by Receptor Tyrosine Kinases	-4.24448	-1.72787	21/521	102,1432,2254,3910,4205,4690,5241,5295,5594,5603,5879,5898,5906,6778,7529,8936,10006,11059,26052,30011,83464	ADAM10,MAPK14,FGF9,LAMA4,MEF2A,NCK1,PGR,PIK3R1,MAPK1,MAPK13,RAC1,RALA,RAP1A,STAT6,YWHAB,WASF1,ABI1,WWP1,DNM3,SH3KBP1,APH1B
12_Member	Reactome Gene Sets	R-HSA-187037	Signaling by NTRK1 (TRKA)	-4.16987	-1.70733	9/115	1432,4205,5295,5594,5603,5898,5906,7529,26052	MAPK14,MEF2A,PIK3R1,MAPK1,MAPK13,RALA,RAP1A,YWHAB,DNM3
12_Member	Reactome Gene Sets	R-HSA-170968	Frs2-mediated activation	-3.15952	-1.13427	3/12	5594,5906,7529	MAPK1,RAP1A,YWHAB
12_Member	Reactome Gene Sets	R-HSA-169893	Prolonged ERK activation events	-2.95066	-1.03299	3/14	5594,5906,7529	MAPK1,RAP1A,YWHAB
12_Member	Reactome Gene Sets	R-HSA-6802948	Signaling by high-kinase activity BRAF mutants	-2.67576	-0.872339	4/36	5594,5906,7529,54518	MAPK1,RAP1A,YWHAB,APBB1IP
12_Member	WikiPathways	WP734	Serotonin receptor 4/6/7 and NR3C signaling	-2.54991	-0.792431	3/19	2908,5594,5906	NR3C1,MAPK1,RAP1A
12_Member	Reactome Gene Sets	R-HSA-5674135	MAP2K and MAPK activation	-2.50572	-0.766521	4/40	5594,5906,7529,54518	MAPK1,RAP1A,YWHAB,APBB1IP
12_Member	Reactome Gene Sets	R-HSA-9656223	Signaling by RAF1 mutants	-2.39076	-0.710452	4/43	5594,5906,7529,54518	MAPK1,RAP1A,YWHAB,APBB1IP
12_Member	Reactome Gene Sets	R-HSA-6802946	Signaling by moderate kinase activity BRAF mutants	-2.25142	-0.637899	4/47	5594,5906,7529,54518	MAPK1,RAP1A,YWHAB,APBB1IP
12_Member	Reactome Gene Sets	R-HSA-6802949	Signaling by RAS mutants	-2.25142	-0.637899	4/47	5594,5906,7529,54518	MAPK1,RAP1A,YWHAB,APBB1IP
12_Member	Reactome Gene Sets	R-HSA-6802955	Paradoxical activation of RAF signaling by kinase inactive BRAF	-2.25142	-0.637899	4/47	5594,5906,7529,54518	MAPK1,RAP1A,YWHAB,APBB1IP
12_Member	Reactome Gene Sets	R-HSA-9649948	Signaling downstream of RAS mutants	-2.25142	-0.637899	4/47	5594,5906,7529,54518	MAPK1,RAP1A,YWHAB,APBB1IP
13_Summary	GO Biological Processes	GO:0097435	supramolecular fiber organization	-5.34063	-2.25747	29/746	567,822,1073,1805,1901,2280,2331,4205,4653,4690,5295,5879,6423,8936,9051,10006,10516,10565,11075,11170,23127,23621,28984,29767,30011,57562,81553,94134,221692,150,4620,5066,5898,6323,8913,10630,22885,84168,116154,94,347,599,1803,5376,8850,9448,9638,11213,26052,84830,2332,2660,3556,5601,50807,51196,53407,5594,8867,55737,64429	B2M,CAPG,CFL2,DPT,S1PR1,FKBP1A,FMOD,MEF2A,MYOC,NCK1,PIK3R1,RAC1,SFRP2,WASF1,PSTPIP1,ABI1,FBLN5,ARFGEF1,STMN2,FAM107A,COLGALT2,BACE1,RGCC,TMOD2,SH3KBP1,CEP126,CYRIA,ARHGAP12,PHACTR1,ADRA2A,MYH2,PAM,RALA,SCN1A,CACNA1G,PDPN,ABLIM3,ANTXR1,PHACTR3,ACVRL1,APOD,BCL2L2,DPP4,PMP22,KAT2B,MAP4K4,FEZ1,IRAK3,DNM3,ADTRP,FMR1,MSTN,IL1RAP,MAPK9,ASAP1,PLCE1,STX18,MAPK1,SYNJ1,VPS35,ZDHHC6
13_Member	GO Biological Processes	GO:0097435	supramolecular fiber organization	-5.34063	-2.25747	29/746	567,822,1073,1805,1901,2280,2331,4205,4653,4690,5295,5879,6423,8936,9051,10006,10516,10565,11075,11170,23127,23621,28984,29767,30011,57562,81553,94134,221692	B2M,CAPG,CFL2,DPT,S1PR1,FKBP1A,FMOD,MEF2A,MYOC,NCK1,PIK3R1,RAC1,SFRP2,WASF1,PSTPIP1,ABI1,FBLN5,ARFGEF1,STMN2,FAM107A,COLGALT2,BACE1,RGCC,TMOD2,SH3KBP1,CEP126,CYRIA,ARHGAP12,PHACTR1
13_Member	GO Biological Processes	GO:0030029	actin filament-based process	-4.81065	-1.92606	29/796	150,822,1073,1901,4205,4620,4653,4690,5066,5295,5879,5898,6323,8913,8936,9051,10006,10565,10630,11170,22885,28984,29767,30011,81553,84168,94134,116154,221692	ADRA2A,CAPG,CFL2,S1PR1,MEF2A,MYH2,MYOC,NCK1,PAM,PIK3R1,RAC1,RALA,SCN1A,CACNA1G,WASF1,PSTPIP1,ABI1,ARFGEF1,PDPN,FAM107A,ABLIM3,RGCC,TMOD2,SH3KBP1,CYRIA,ANTXR1,ARHGAP12,PHACTR3,PHACTR1
13_Member	GO Biological Processes	GO:0030036	actin cytoskeleton organization	-4.0004	-1.62829	25/709	150,822,1073,1901,4205,4653,4690,5066,5295,5879,5898,8936,9051,10006,10565,11170,22885,28984,29767,30011,81553,84168,94134,116154,221692	ADRA2A,CAPG,CFL2,S1PR1,MEF2A,MYOC,NCK1,PAM,PIK3R1,RAC1,RALA,WASF1,PSTPIP1,ABI1,ARFGEF1,FAM107A,ABLIM3,RGCC,TMOD2,SH3KBP1,CYRIA,ANTXR1,ARHGAP12,PHACTR3,PHACTR1
13_Member	GO Biological Processes	GO:0007015	actin filament organization	-3.78692	-1.51527	18/441	822,1073,1901,4653,4690,5295,5879,8936,9051,10006,10565,11170,28984,29767,30011,81553,94134,221692	CAPG,CFL2,S1PR1,MYOC,NCK1,PIK3R1,RAC1,WASF1,PSTPIP1,ABI1,ARFGEF1,FAM107A,RGCC,TMOD2,SH3KBP1,CYRIA,ARHGAP12,PHACTR1
13_Member	GO Biological Processes	GO:0008154	actin polymerization or depolymerization	-3.28087	-1.19658	11/217	822,1073,4690,5879,8936,9051,10006,10565,11170,29767,81553	CAPG,CFL2,NCK1,RAC1,WASF1,PSTPIP1,ABI1,ARFGEF1,FAM107A,TMOD2,CYRIA
13_Member	GO Biological Processes	GO:0110053	regulation of actin filament organization	-2.94094	-1.03102	12/276	822,1073,1901,4653,4690,5295,5879,8936,10565,28984,29767,81553	CAPG,CFL2,S1PR1,MYOC,NCK1,PIK3R1,RAC1,WASF1,ARFGEF1,RGCC,TMOD2,CYRIA
13_Member	GO Biological Processes	GO:0032970	regulation of actin filament-based process	-2.92345	-1.02879	15/396	822,1073,1901,4653,4690,5066,5295,5879,8936,10565,10630,11170,28984,29767,81553	CAPG,CFL2,S1PR1,MYOC,NCK1,PAM,PIK3R1,RAC1,WASF1,ARFGEF1,PDPN,FAM107A,RGCC,TMOD2,CYRIA
13_Member	GO Biological Processes	GO:0032956	regulation of actin cytoskeleton organization	-2.90562	-1.01521	14/357	822,1073,1901,4653,4690,5066,5295,5879,8936,10565,11170,28984,29767,81553	CAPG,CFL2,S1PR1,MYOC,NCK1,PAM,PIK3R1,RAC1,WASF1,ARFGEF1,FAM107A,RGCC,TMOD2,CYRIA
13_Member	GO Biological Processes	GO:0030041	actin filament polymerization	-2.58257	-0.806317	9/190	822,4690,5879,8936,9051,10565,11170,29767,81553	CAPG,NCK1,RAC1,WASF1,PSTPIP1,ARFGEF1,FAM107A,TMOD2,CYRIA
13_Member	GO Biological Processes	GO:0051129	negative regulation of cellular component organization	-2.57224	-0.801598	22/748	94,347,567,599,822,1803,1901,4653,5295,5376,5879,8850,9448,9638,10565,11075,11170,11213,26052,29767,84168,84830	ACVRL1,APOD,B2M,BCL2L2,CAPG,DPP4,S1PR1,MYOC,PIK3R1,PMP22,RAC1,KAT2B,MAP4K4,FEZ1,ARFGEF1,STMN2,FAM107A,IRAK3,DNM3,TMOD2,ANTXR1,ADTRP
13_Member	GO Biological Processes	GO:0044089	positive regulation of cellular component biogenesis	-2.53986	-0.79081	17/522	822,2332,2660,3556,4653,4690,5295,5601,5879,5898,8936,9448,26052,28984,50807,51196,53407	CAPG,FMR1,MSTN,IL1RAP,MYOC,NCK1,PIK3R1,MAPK9,RAC1,RALA,WASF1,MAP4K4,DNM3,RGCC,ASAP1,PLCE1,STX18
13_Member	GO Biological Processes	GO:0051493	regulation of cytoskeleton organization	-2.50634	-0.766521	17/526	822,1073,1901,4653,4690,5066,5295,5594,5879,8850,8936,10565,11075,11170,28984,29767,81553	CAPG,CFL2,S1PR1,MYOC,NCK1,PAM,PIK3R1,MAPK1,RAC1,KAT2B,WASF1,ARFGEF1,STMN2,FAM107A,RGCC,TMOD2,CYRIA
13_Member	GO Biological Processes	GO:0051494	negative regulation of cytoskeleton organization	-2.46134	-0.742097	8/162	822,1901,4653,5295,8850,10565,11075,29767	CAPG,S1PR1,MYOC,PIK3R1,KAT2B,ARFGEF1,STMN2,TMOD2
13_Member	GO Biological Processes	GO:1902903	regulation of supramolecular fiber organization	-2.23659	-0.629177	13/380	822,1073,1901,4653,4690,5295,5879,8936,10565,11075,28984,29767,81553	CAPG,CFL2,S1PR1,MYOC,NCK1,PIK3R1,RAC1,WASF1,ARFGEF1,STMN2,RGCC,TMOD2,CYRIA
13_Member	GO Biological Processes	GO:0010638	positive regulation of organelle organization	-2.05221	-0.510059	17/586	822,1073,2332,4653,4690,5594,5601,5879,5898,8867,8936,11075,28984,50807,53407,55737,64429	CAPG,CFL2,FMR1,MYOC,NCK1,MAPK1,MAPK9,RAC1,RALA,SYNJ1,WASF1,STMN2,RGCC,ASAP1,STX18,VPS35,ZDHHC6
14_Summary	GO Biological Processes	GO:0032870	cellular response to hormone stimulus	-5.34043	-2.25747	25/588	150,478,490,677,1176,1508,1520,1646,2308,2660,2908,4690,5166,5241,5295,5618,6778,8031,8611,8644,8850,11170,54331,55198,84830,599,968,1432,1620,5244,5594,56603,57088,259230,2796,3030,3676,4313,4321,22861,23621,4129,93986,366,5028,5603,5906,10681,55737,2332,5066	ADRA2A,ATP1A3,ATP2B1,ZFP36L1,AP3S1,CTSB,CTSS,AKR1C2,FOXO1,MSTN,NR3C1,NCK1,PDK4,PGR,PIK3R1,PRLR,STAT6,NCOA4,PLPP1,AKR1C3,KAT2B,FAM107A,GNG2,APPL2,ADTRP,BCL2L2,CD68,MAPK14,BRINP1,ABCB4,MAPK1,CYP26B1,PLSCR4,SGMS1,GNRH1,HADHA,ITGA4,MMP2,MMP12,NLRP1,BACE1,MAOB,FOXP2,AQP9,P2RY1,MAPK13,RAP1A,GNB5,VPS35,FMR1,PAM
14_Member	GO Biological Processes	GO:0032870	cellular response to hormone stimulus	-5.34043	-2.25747	25/588	150,478,490,677,1176,1508,1520,1646,2308,2660,2908,4690,5166,5241,5295,5618,6778,8031,8611,8644,8850,11170,54331,55198,84830	ADRA2A,ATP1A3,ATP2B1,ZFP36L1,AP3S1,CTSB,CTSS,AKR1C2,FOXO1,MSTN,NR3C1,NCK1,PDK4,PGR,PIK3R1,PRLR,STAT6,NCOA4,PLPP1,AKR1C3,KAT2B,FAM107A,GNG2,APPL2,ADTRP
14_Member	GO Biological Processes	GO:0071396	cellular response to lipid	-4.54248	-1.82562	23/575	478,490,599,677,968,1432,1620,1646,2308,2660,2908,5166,5241,5244,5594,8031,8611,8644,11170,56603,57088,84830,259230	ATP1A3,ATP2B1,BCL2L2,ZFP36L1,CD68,MAPK14,BRINP1,AKR1C2,FOXO1,MSTN,NR3C1,PDK4,PGR,ABCB4,MAPK1,NCOA4,PLPP1,AKR1C3,FAM107A,CYP26B1,PLSCR4,ADTRP,SGMS1
14_Member	GO Biological Processes	GO:0071384	cellular response to corticosteroid stimulus	-4.416	-1.80353	7/61	490,677,2308,2660,2908,8644,11170	ATP2B1,ZFP36L1,FOXO1,MSTN,NR3C1,AKR1C3,FAM107A
14_Member	GO Biological Processes	GO:1901652	response to peptide	-4.40132	-1.80353	21/508	478,490,599,677,1176,1432,2308,2660,2796,3030,3676,4313,4321,4690,5166,5295,6778,8850,22861,23621,55198	ATP1A3,ATP2B1,BCL2L2,ZFP36L1,AP3S1,MAPK14,FOXO1,MSTN,GNRH1,HADHA,ITGA4,MMP2,MMP12,NCK1,PDK4,PIK3R1,STAT6,KAT2B,NLRP1,BACE1,APPL2
14_Member	GO Biological Processes	GO:1901654	response to ketone	-4.38596	-1.80353	12/192	490,1646,2308,2660,2796,2908,4129,5244,8031,8644,54331,93986	ATP2B1,AKR1C2,FOXO1,MSTN,GNRH1,NR3C1,MAOB,ABCB4,NCOA4,AKR1C3,GNG2,FOXP2
14_Member	GO Biological Processes	GO:0071417	cellular response to organonitrogen compound	-4.30272	-1.76432	24/637	366,478,490,599,677,1176,2308,2660,3676,4313,4690,5028,5166,5295,5594,5603,5906,6778,8850,10681,23621,54331,55198,55737	AQP9,ATP1A3,ATP2B1,BCL2L2,ZFP36L1,AP3S1,FOXO1,MSTN,ITGA4,MMP2,NCK1,P2RY1,PDK4,PIK3R1,MAPK1,MAPK13,RAP1A,STAT6,KAT2B,GNB5,BACE1,GNG2,APPL2,VPS35
14_Member	GO Biological Processes	GO:1901699	cellular response to nitrogen compound	-4.16595	-1.70733	25/692	366,478,490,599,677,1176,2308,2332,2660,3676,4313,4690,5028,5166,5295,5594,5603,5906,6778,8850,10681,23621,54331,55198,55737	AQP9,ATP1A3,ATP2B1,BCL2L2,ZFP36L1,AP3S1,FOXO1,FMR1,MSTN,ITGA4,MMP2,NCK1,P2RY1,PDK4,PIK3R1,MAPK1,MAPK13,RAP1A,STAT6,KAT2B,GNB5,BACE1,GNG2,APPL2,VPS35
14_Member	GO Biological Processes	GO:0071383	cellular response to steroid hormone stimulus	-4.13158	-1.68895	12/204	478,490,677,2308,2660,2908,5241,8031,8611,8644,11170,84830	ATP1A3,ATP2B1,ZFP36L1,FOXO1,MSTN,NR3C1,PGR,NCOA4,PLPP1,AKR1C3,FAM107A,ADTRP
14_Member	GO Biological Processes	GO:1901655	cellular response to ketone	-4.02257	-1.63399	8/94	490,1646,2308,2660,2908,8031,8644,54331	ATP2B1,AKR1C2,FOXO1,MSTN,NR3C1,NCOA4,AKR1C3,GNG2
14_Member	GO Biological Processes	GO:0071385	cellular response to glucocorticoid stimulus	-3.69178	-1.45717	6/56	490,677,2308,2660,2908,11170	ATP2B1,ZFP36L1,FOXO1,MSTN,NR3C1,FAM107A
14_Member	GO Biological Processes	GO:0048545	response to steroid hormone	-3.61786	-1.39714	15/339	478,490,677,2308,2660,2796,2908,4129,5066,5241,8031,8611,8644,11170,84830	ATP1A3,ATP2B1,ZFP36L1,FOXO1,MSTN,GNRH1,NR3C1,MAOB,PAM,PGR,NCOA4,PLPP1,AKR1C3,FAM107A,ADTRP
14_Member	GO Biological Processes	GO:0031960	response to corticosteroid	-3.5989	-1.38948	10/167	490,677,2308,2660,2796,2908,4129,5066,8644,11170	ATP2B1,ZFP36L1,FOXO1,MSTN,GNRH1,NR3C1,MAOB,PAM,AKR1C3,FAM107A
14_Member	GO Biological Processes	GO:0071407	cellular response to organic cyclic compound	-3.55286	-1.37867	21/585	366,478,490,599,677,2308,2660,2908,5028,5241,5244,5594,5906,8031,8611,8644,10681,11170,54331,55737,84830	AQP9,ATP1A3,ATP2B1,BCL2L2,ZFP36L1,FOXO1,MSTN,NR3C1,P2RY1,PGR,ABCB4,MAPK1,RAP1A,NCOA4,PLPP1,AKR1C3,GNB5,FAM107A,GNG2,VPS35,ADTRP
14_Member	GO Biological Processes	GO:1901653	cellular response to peptide	-3.30555	-1.20569	15/363	478,490,599,677,1176,2308,2660,3676,4690,5166,5295,6778,8850,23621,55198	ATP1A3,ATP2B1,BCL2L2,ZFP36L1,AP3S1,FOXO1,MSTN,ITGA4,NCK1,PDK4,PIK3R1,STAT6,KAT2B,BACE1,APPL2
14_Member	GO Biological Processes	GO:0032869	cellular response to insulin stimulus	-2.90618	-1.01521	10/205	490,677,1176,2308,2660,4690,5166,5295,8850,55198	ATP2B1,ZFP36L1,AP3S1,FOXO1,MSTN,NCK1,PDK4,PIK3R1,KAT2B,APPL2
14_Member	GO Biological Processes	GO:0051384	response to glucocorticoid	-2.70355	-0.887144	8/148	490,677,2308,2660,2908,4129,5066,11170	ATP2B1,ZFP36L1,FOXO1,MSTN,NR3C1,MAOB,PAM,FAM107A
14_Member	GO Biological Processes	GO:0032868	response to insulin	-2.57226	-0.801598	11/266	490,677,1176,2308,2660,3030,4690,5166,5295,8850,55198	ATP2B1,ZFP36L1,AP3S1,FOXO1,MSTN,HADHA,NCK1,PDK4,PIK3R1,KAT2B,APPL2
14_Member	GO Biological Processes	GO:0071375	cellular response to peptide hormone stimulus	-2.269	-0.64049	11/292	490,677,1176,2308,2660,4690,5166,5295,6778,8850,55198	ATP2B1,ZFP36L1,AP3S1,FOXO1,MSTN,NCK1,PDK4,PIK3R1,STAT6,KAT2B,APPL2
14_Member	GO Biological Processes	GO:0008286	insulin receptor signaling pathway	-2.0259	-0.492304	6/118	1176,2308,2660,4690,5166,5295	AP3S1,FOXO1,MSTN,NCK1,PDK4,PIK3R1
15_Summary	GO Biological Processes	GO:0040017	positive regulation of locomotion	-5.23897	-2.2111	25/596	102,150,1432,1901,2254,2660,3603,3676,4653,5168,5295,5594,5879,7499,8650,9448,10396,10630,11149,11170,57007,64094,65125,79872,158747,9638,347,1803,56477,84830,51554,5898,23032,23114,4321,5603,51704,135250,353091	ADAM10,ADRA2A,MAPK14,S1PR1,FGF9,MSTN,IL16,ITGA4,MYOC,ENPP2,PIK3R1,MAPK1,RAC1,XG,NUMB,MAP4K4,ATP8A1,PDPN,BVES,FAM107A,ACKR3,SMOC2,WNK1,CBLL1,MOSPD2,FEZ1,APOD,DPP4,CCL28,ADTRP,ACKR4,RALA,USP33,NFASC,MMP12,MAPK13,GPRC5B,RAET1E,RAET1G
15_Member	GO Biological Processes	GO:0040017	positive regulation of locomotion	-5.23897	-2.2111	25/596	102,150,1432,1901,2254,2660,3603,3676,4653,5168,5295,5594,5879,7499,8650,9448,10396,10630,11149,11170,57007,64094,65125,79872,158747	ADAM10,ADRA2A,MAPK14,S1PR1,FGF9,MSTN,IL16,ITGA4,MYOC,ENPP2,PIK3R1,MAPK1,RAC1,XG,NUMB,MAP4K4,ATP8A1,PDPN,BVES,FAM107A,ACKR3,SMOC2,WNK1,CBLL1,MOSPD2
15_Member	GO Biological Processes	GO:0051272	positive regulation of cellular component movement	-4.78573	-1.91538	24/594	102,150,1432,1901,2254,2660,3676,4653,5168,5295,5594,5879,7499,8650,9448,9638,10396,10630,11170,57007,64094,65125,79872,158747	ADAM10,ADRA2A,MAPK14,S1PR1,FGF9,MSTN,ITGA4,MYOC,ENPP2,PIK3R1,MAPK1,RAC1,XG,NUMB,MAP4K4,FEZ1,ATP8A1,PDPN,FAM107A,ACKR3,SMOC2,WNK1,CBLL1,MOSPD2
15_Member	GO Biological Processes	GO:0030335	positive regulation of cell migration	-4.77025	-1.91369	23/556	102,150,1432,1901,2254,2660,3676,4653,5168,5295,5594,5879,7499,8650,9448,10396,10630,11170,57007,64094,65125,79872,158747	ADAM10,ADRA2A,MAPK14,S1PR1,FGF9,MSTN,ITGA4,MYOC,ENPP2,PIK3R1,MAPK1,RAC1,XG,NUMB,MAP4K4,ATP8A1,PDPN,FAM107A,ACKR3,SMOC2,WNK1,CBLL1,MOSPD2
15_Member	GO Biological Processes	GO:2000147	positive regulation of cell motility	-4.46146	-1.80732	23/582	102,150,1432,1901,2254,2660,3676,4653,5168,5295,5594,5879,7499,8650,9448,10396,10630,11170,57007,64094,65125,79872,158747	ADAM10,ADRA2A,MAPK14,S1PR1,FGF9,MSTN,ITGA4,MYOC,ENPP2,PIK3R1,MAPK1,RAC1,XG,NUMB,MAP4K4,ATP8A1,PDPN,FAM107A,ACKR3,SMOC2,WNK1,CBLL1,MOSPD2
15_Member	GO Biological Processes	GO:0002685	regulation of leukocyte migration	-3.9727	-1.62829	12/212	102,347,1803,2660,3676,5594,5879,7499,56477,65125,84830,158747	ADAM10,APOD,DPP4,MSTN,ITGA4,MAPK1,RAC1,XG,CCL28,WNK1,ADTRP,MOSPD2
15_Member	GO Biological Processes	GO:0050921	positive regulation of chemotaxis	-3.49695	-1.32557	9/141	102,1901,2660,3603,5594,5879,64094,65125,158747	ADAM10,S1PR1,MSTN,IL16,MAPK1,RAC1,SMOC2,WNK1,MOSPD2
15_Member	GO Biological Processes	GO:0071675	regulation of mononuclear cell migration	-3.44272	-1.29585	8/114	102,347,2660,3676,5594,65125,84830,158747	ADAM10,APOD,MSTN,ITGA4,MAPK1,WNK1,ADTRP,MOSPD2
15_Member	GO Biological Processes	GO:0071674	mononuclear cell migration	-3.05365	-1.07794	10/196	102,347,1901,2660,3676,5594,7499,65125,84830,158747	ADAM10,APOD,S1PR1,MSTN,ITGA4,MAPK1,XG,WNK1,ADTRP,MOSPD2
15_Member	GO Biological Processes	GO:0071622	regulation of granulocyte chemotaxis	-2.9798	-1.04053	5/51	1803,2660,5594,5879,158747	DPP4,MSTN,MAPK1,RAC1,MOSPD2
15_Member	GO Biological Processes	GO:0060326	cell chemotaxis	-2.97144	-1.04044	13/312	102,1803,1901,2660,3603,5594,5879,51554,56477,57007,64094,65125,158747	ADAM10,DPP4,S1PR1,MSTN,IL16,MAPK1,RAC1,ACKR4,CCL28,ACKR3,SMOC2,WNK1,MOSPD2
15_Member	GO Biological Processes	GO:0002687	positive regulation of leukocyte migration	-2.95746	-1.03299	8/135	102,2660,3676,5594,5879,7499,65125,158747	ADAM10,MSTN,ITGA4,MAPK1,RAC1,XG,WNK1,MOSPD2
15_Member	GO Biological Processes	GO:0050900	leukocyte migration	-2.73919	-0.910233	14/372	102,347,1803,1901,2660,3603,3676,5594,5879,7499,56477,65125,84830,158747	ADAM10,APOD,DPP4,S1PR1,MSTN,IL16,ITGA4,MAPK1,RAC1,XG,CCL28,WNK1,ADTRP,MOSPD2
15_Member	GO Biological Processes	GO:0050920	regulation of chemotaxis	-2.62253	-0.835441	10/224	102,1803,1901,2660,3603,5594,5879,64094,65125,158747	ADAM10,DPP4,S1PR1,MSTN,IL16,MAPK1,RAC1,SMOC2,WNK1,MOSPD2
15_Member	GO Biological Processes	GO:0006935	chemotaxis	-2.58333	-0.806317	19/607	102,1432,1803,1901,2660,3603,5168,5594,5879,5898,9638,23032,23114,51554,56477,57007,64094,65125,158747	ADAM10,MAPK14,DPP4,S1PR1,MSTN,IL16,ENPP2,MAPK1,RAC1,RALA,FEZ1,USP33,NFASC,ACKR4,CCL28,ACKR3,SMOC2,WNK1,MOSPD2
15_Member	GO Biological Processes	GO:0042330	taxis	-2.55992	-0.794805	19/610	102,1432,1803,1901,2660,3603,5168,5594,5879,5898,9638,23032,23114,51554,56477,57007,64094,65125,158747	ADAM10,MAPK14,DPP4,S1PR1,MSTN,IL16,ENPP2,MAPK1,RAC1,RALA,FEZ1,USP33,NFASC,ACKR4,CCL28,ACKR3,SMOC2,WNK1,MOSPD2
15_Member	GO Biological Processes	GO:0002688	regulation of leukocyte chemotaxis	-2.55286	-0.792431	7/123	102,1803,2660,5594,5879,65125,158747	ADAM10,DPP4,MSTN,MAPK1,RAC1,WNK1,MOSPD2
15_Member	GO Biological Processes	GO:0002690	positive regulation of leukocyte chemotaxis	-2.50199	-0.766521	6/94	102,2660,5594,5879,65125,158747	ADAM10,MSTN,MAPK1,RAC1,WNK1,MOSPD2
15_Member	GO Biological Processes	GO:1902622	regulation of neutrophil migration	-2.428	-0.729759	4/42	1803,5879,7499,158747	DPP4,RAC1,XG,MOSPD2
15_Member	GO Biological Processes	GO:0032103	positive regulation of response to external stimulus	-2.20986	-0.613645	14/427	102,1901,2660,3603,4321,5594,5603,5879,51704,64094,65125,135250,158747,353091	ADAM10,S1PR1,MSTN,IL16,MMP12,MAPK1,MAPK13,RAC1,GPRC5B,SMOC2,WNK1,RAET1E,MOSPD2,RAET1G
15_Member	GO Biological Processes	GO:1902624	positive regulation of neutrophil migration	-2.06472	-0.519913	3/28	5879,7499,158747	RAC1,XG,MOSPD2
15_Member	GO Biological Processes	GO:0030595	leukocyte chemotaxis	-2.02563	-0.492304	9/232	102,1803,1901,2660,3603,5594,5879,65125,158747	ADAM10,DPP4,S1PR1,MSTN,IL16,MAPK1,RAC1,WNK1,MOSPD2
16_Summary	GO Biological Processes	GO:0006897	endocytosis	-5.22689	-2.2111	26/636	567,2332,3676,5168,5594,5879,8650,8674,8867,8936,9051,9765,22925,23032,26052,27342,30011,51554,55198,57007,58480,79872,94134,115548,115677,261729,150,717,3598,5028,5898,5906,8724,8913,11149,23086,23621,53407	B2M,FMR1,ITGA4,ENPP2,MAPK1,RAC1,NUMB,VAMP4,SYNJ1,WASF1,PSTPIP1,ZFYVE16,PLA2R1,USP33,DNM3,RABGEF1,SH3KBP1,ACKR4,APPL2,ACKR3,RHOU,CBLL1,ARHGAP12,FCHO2,NOSTRIN,STEAP2,ADRA2A,C2,IL13RA2,P2RY1,RALA,RAP1A,SNX3,CACNA1G,BVES,EXPH5,BACE1,STX18
16_Member	GO Biological Processes	GO:0006897	endocytosis	-5.22689	-2.2111	26/636	567,2332,3676,5168,5594,5879,8650,8674,8867,8936,9051,9765,22925,23032,26052,27342,30011,51554,55198,57007,58480,79872,94134,115548,115677,261729	B2M,FMR1,ITGA4,ENPP2,MAPK1,RAC1,NUMB,VAMP4,SYNJ1,WASF1,PSTPIP1,ZFYVE16,PLA2R1,USP33,DNM3,RABGEF1,SH3KBP1,ACKR4,APPL2,ACKR3,RHOU,CBLL1,ARHGAP12,FCHO2,NOSTRIN,STEAP2
16_Member	GO Biological Processes	GO:0060627	regulation of vesicle-mediated transport	-4.61043	-1.8285	22/530	150,567,717,2332,3598,5028,5594,5879,5898,5906,8650,8674,8724,8867,8913,9765,11149,23086,23621,53407,55198,79872	ADRA2A,B2M,C2,FMR1,IL13RA2,P2RY1,MAPK1,RAC1,RALA,RAP1A,NUMB,VAMP4,SNX3,SYNJ1,CACNA1G,ZFYVE16,BVES,EXPH5,BACE1,STX18,APPL2,CBLL1
16_Member	GO Biological Processes	GO:0006898	receptor-mediated endocytosis	-2.79542	-0.946925	11/249	567,2332,3676,5879,8650,8867,8936,22925,26052,57007,115548	B2M,FMR1,ITGA4,RAC1,NUMB,SYNJ1,WASF1,PLA2R1,DNM3,ACKR3,FCHO2
16_Member	GO Biological Processes	GO:0030100	regulation of endocytosis	-2.24492	-0.635744	9/214	567,2332,5879,8650,8674,8867,9765,55198,79872	B2M,FMR1,RAC1,NUMB,VAMP4,SYNJ1,ZFYVE16,APPL2,CBLL1
17_Summary	GO Biological Processes	GO:0010876	lipid localization	-5.21108	-2.2111	21/448	347,366,3990,5244,5306,6646,8542,8605,10396,22925,26031,28232,50640,51703,55294,57088,79068,79895,80765,83850,161291	APOD,AQP9,LIPC,ABCB4,PITPNA,SOAT1,APOL1,PLA2G4C,ATP8A1,PLA2R1,OSBPL3,SLCO3A1,PNPLA8,ACSL5,FBXW7,PLSCR4,FTO,ATP8B4,STARD5,ESYT3,TMEM30B
17_Member	GO Biological Processes	GO:0010876	lipid localization	-5.21108	-2.2111	21/448	347,366,3990,5244,5306,6646,8542,8605,10396,22925,26031,28232,50640,51703,55294,57088,79068,79895,80765,83850,161291	APOD,AQP9,LIPC,ABCB4,PITPNA,SOAT1,APOL1,PLA2G4C,ATP8A1,PLA2R1,OSBPL3,SLCO3A1,PNPLA8,ACSL5,FBXW7,PLSCR4,FTO,ATP8B4,STARD5,ESYT3,TMEM30B
17_Member	GO Biological Processes	GO:0006869	lipid transport	-4.34815	-1.78359	18/398	347,366,3990,5244,5306,6646,8542,10396,22925,26031,28232,50640,51703,57088,79895,80765,83850,161291	APOD,AQP9,LIPC,ABCB4,PITPNA,SOAT1,APOL1,ATP8A1,PLA2R1,OSBPL3,SLCO3A1,PNPLA8,ACSL5,PLSCR4,ATP8B4,STARD5,ESYT3,TMEM30B
17_Member	GO Biological Processes	GO:0045332	phospholipid translocation	-3.14334	-1.12405	5/47	5244,10396,57088,79895,161291	ABCB4,ATP8A1,PLSCR4,ATP8B4,TMEM30B
17_Member	GO Biological Processes	GO:0034204	lipid translocation	-2.94128	-1.03102	5/52	5244,10396,57088,79895,161291	ABCB4,ATP8A1,PLSCR4,ATP8B4,TMEM30B
17_Member	GO Biological Processes	GO:0097035	regulation of membrane lipid distribution	-2.72726	-0.902109	5/58	5244,10396,57088,79895,161291	ABCB4,ATP8A1,PLSCR4,ATP8B4,TMEM30B
17_Member	GO Biological Processes	GO:0015914	phospholipid transport	-2.45659	-0.738333	6/96	5244,5306,10396,57088,79895,161291	ABCB4,PITPNA,ATP8A1,PLSCR4,ATP8B4,TMEM30B
18_Summary	GO Biological Processes	GO:0051051	negative regulation of transport	-4.85534	-1.94206	21/473	150,347,1193,2280,2332,3598,4129,5028,5593,5879,5906,7009,8724,9341,9448,10681,22925,55198,55737,65125,84830,5898,7127,8867,8913,10565,23086,23621,55763,56900,261729,284021,223,4128,26002,145270,1803,5066,28984,114899,8650,8674,26052,115548	ADRA2A,APOD,CLIC2,FKBP1A,FMR1,IL13RA2,MAOB,P2RY1,PRKG2,RAC1,RAP1A,TMBIM6,SNX3,VAMP3,MAP4K4,GNB5,PLA2R1,APPL2,VPS35,WNK1,ADTRP,RALA,TNFAIP2,SYNJ1,CACNA1G,ARFGEF1,EXPH5,BACE1,EXOC1,TMEM167B,STEAP2,MILR1,ALDH9A1,MAOA,MOXD1,PRIMA1,DPP4,PAM,RGCC,C1QTNF3,NUMB,VAMP4,DNM3,FCHO2
18_Member	GO Biological Processes	GO:0051051	negative regulation of transport	-4.85534	-1.94206	21/473	150,347,1193,2280,2332,3598,4129,5028,5593,5879,5906,7009,8724,9341,9448,10681,22925,55198,55737,65125,84830	ADRA2A,APOD,CLIC2,FKBP1A,FMR1,IL13RA2,MAOB,P2RY1,PRKG2,RAC1,RAP1A,TMBIM6,SNX3,VAMP3,MAP4K4,GNB5,PLA2R1,APPL2,VPS35,WNK1,ADTRP
18_Member	GO Biological Processes	GO:0006887	exocytosis	-4.44562	-1.80353	17/355	150,2332,3598,5028,5898,5906,7127,8867,8913,9341,10565,23086,23621,55763,56900,261729,284021	ADRA2A,FMR1,IL13RA2,P2RY1,RALA,RAP1A,TNFAIP2,SYNJ1,CACNA1G,VAMP3,ARFGEF1,EXPH5,BACE1,EXOC1,TMEM167B,STEAP2,MILR1
18_Member	GO Biological Processes	GO:0051048	negative regulation of secretion	-4.18075	-1.70733	11/171	150,2332,3598,4129,5028,5906,9341,9448,22925,65125,84830	ADRA2A,FMR1,IL13RA2,MAOB,P2RY1,RAP1A,VAMP3,MAP4K4,PLA2R1,WNK1,ADTRP
18_Member	GO Biological Processes	GO:1903306	negative regulation of regulated secretory pathway	-3.43115	-1.28792	4/23	150,2332,3598,5906	ADRA2A,FMR1,IL13RA2,RAP1A
18_Member	GO Biological Processes	GO:1903531	negative regulation of secretion by cell	-3.36389	-1.24273	9/147	150,2332,3598,4129,5028,5906,9341,9448,84830	ADRA2A,FMR1,IL13RA2,MAOB,P2RY1,RAP1A,VAMP3,MAP4K4,ADTRP
18_Member	GO Biological Processes	GO:0001505	regulation of neurotransmitter levels	-3.34855	-1.22988	11/213	150,223,2332,4128,4129,5028,5906,8867,23621,26002,145270	ADRA2A,ALDH9A1,FMR1,MAOA,MAOB,P2RY1,RAP1A,SYNJ1,BACE1,MOXD1,PRIMA1
18_Member	GO Biological Processes	GO:0032940	secretion by cell	-3.25553	-1.18163	25/795	150,1803,2332,3598,4129,5028,5066,5879,5898,5906,7127,8867,8913,9341,9448,10565,23086,23621,28984,55763,56900,84830,114899,261729,284021	ADRA2A,DPP4,FMR1,IL13RA2,MAOB,P2RY1,PAM,RAC1,RALA,RAP1A,TNFAIP2,SYNJ1,CACNA1G,VAMP3,MAP4K4,ARFGEF1,EXPH5,BACE1,RGCC,EXOC1,TMEM167B,ADTRP,C1QTNF3,STEAP2,MILR1
18_Member	GO Biological Processes	GO:0051046	regulation of secretion	-3.19723	-1.14859	21/623	150,1803,2332,3598,4129,5028,5066,5879,5898,5906,8913,9341,9448,22925,23086,23621,28984,55763,65125,84830,114899	ADRA2A,DPP4,FMR1,IL13RA2,MAOB,P2RY1,PAM,RAC1,RALA,RAP1A,CACNA1G,VAMP3,MAP4K4,PLA2R1,EXPH5,BACE1,RGCC,EXOC1,WNK1,ADTRP,C1QTNF3
18_Member	GO Biological Processes	GO:0045055	regulated exocytosis	-3.05689	-1.07794	11/231	150,2332,3598,5028,5906,8867,8913,9341,23621,261729,284021	ADRA2A,FMR1,IL13RA2,P2RY1,RAP1A,SYNJ1,CACNA1G,VAMP3,BACE1,STEAP2,MILR1
18_Member	GO Biological Processes	GO:0099003	vesicle-mediated transport in synapse	-2.95433	-1.03299	10/202	150,2332,5028,5906,8650,8674,8867,23621,26052,115548	ADRA2A,FMR1,P2RY1,RAP1A,NUMB,VAMP4,SYNJ1,BACE1,DNM3,FCHO2
18_Member	GO Biological Processes	GO:1903530	regulation of secretion by cell	-2.93369	-1.02879	19/565	150,1803,2332,3598,4129,5028,5066,5879,5898,5906,8913,9341,9448,23086,23621,28984,55763,84830,114899	ADRA2A,DPP4,FMR1,IL13RA2,MAOB,P2RY1,PAM,RAC1,RALA,RAP1A,CACNA1G,VAMP3,MAP4K4,EXPH5,BACE1,RGCC,EXOC1,ADTRP,C1QTNF3
18_Member	GO Biological Processes	GO:2000300	regulation of synaptic vesicle exocytosis	-2.8668	-0.997999	5/54	150,2332,5028,5906,23621	ADRA2A,FMR1,P2RY1,RAP1A,BACE1
18_Member	GO Biological Processes	GO:0045920	negative regulation of exocytosis	-2.81843	-0.967262	4/33	150,2332,3598,5906	ADRA2A,FMR1,IL13RA2,RAP1A
18_Member	GO Biological Processes	GO:0099504	synaptic vesicle cycle	-2.69252	-0.884698	9/183	150,2332,5028,5906,8674,8867,23621,26052,115548	ADRA2A,FMR1,P2RY1,RAP1A,VAMP4,SYNJ1,BACE1,DNM3,FCHO2
18_Member	GO Biological Processes	GO:0017157	regulation of exocytosis	-2.37873	-0.703659	9/204	150,2332,3598,5028,5898,5906,8913,23086,23621	ADRA2A,FMR1,IL13RA2,P2RY1,RALA,RAP1A,CACNA1G,EXPH5,BACE1
18_Member	GO Biological Processes	GO:1903305	regulation of regulated secretory pathway	-2.31251	-0.662667	7/136	150,2332,3598,5028,5906,8913,23621	ADRA2A,FMR1,IL13RA2,P2RY1,RAP1A,CACNA1G,BACE1
18_Member	GO Biological Processes	GO:0016079	synaptic vesicle exocytosis	-2.24643	-0.635744	6/106	150,2332,5028,5906,8867,23621	ADRA2A,FMR1,P2RY1,RAP1A,SYNJ1,BACE1
19_Summary	GO Biological Processes	GO:0050801	ion homeostasis	-4.85106	-1.94206	29/792	478,490,567,1193,1318,1901,2280,4653,5028,5166,5594,7009,8031,8913,8989,9104,10159,26872,51196,51554,55283,56477,57007,57217,65125,79901,162514,261729,285195	ATP1A3,ATP2B1,B2M,CLIC2,SLC31A2,S1PR1,FKBP1A,MYOC,P2RY1,PDK4,MAPK1,TMBIM6,NCOA4,CACNA1G,TRPA1,RGN,ATP6AP2,STEAP1,PLCE1,ACKR4,MCOLN3,CCL28,ACKR3,TTC7A,WNK1,CYBRD1,TRPV3,STEAP2,SLC9A9
19_Member	GO Biological Processes	GO:0050801	ion homeostasis	-4.85106	-1.94206	29/792	478,490,567,1193,1318,1901,2280,4653,5028,5166,5594,7009,8031,8913,8989,9104,10159,26872,51196,51554,55283,56477,57007,57217,65125,79901,162514,261729,285195	ATP1A3,ATP2B1,B2M,CLIC2,SLC31A2,S1PR1,FKBP1A,MYOC,P2RY1,PDK4,MAPK1,TMBIM6,NCOA4,CACNA1G,TRPA1,RGN,ATP6AP2,STEAP1,PLCE1,ACKR4,MCOLN3,CCL28,ACKR3,TTC7A,WNK1,CYBRD1,TRPV3,STEAP2,SLC9A9
19_Member	GO Biological Processes	GO:0055080	cation homeostasis	-4.19917	-1.71252	26/731	478,490,567,1193,1318,1901,2280,5028,5166,5594,7009,8031,8989,9104,10159,26872,51196,51554,55283,56477,57007,57217,79901,162514,261729,285195	ATP1A3,ATP2B1,B2M,CLIC2,SLC31A2,S1PR1,FKBP1A,P2RY1,PDK4,MAPK1,TMBIM6,NCOA4,TRPA1,RGN,ATP6AP2,STEAP1,PLCE1,ACKR4,MCOLN3,CCL28,ACKR3,TTC7A,CYBRD1,TRPV3,STEAP2,SLC9A9
19_Member	GO Biological Processes	GO:0098771	inorganic ion homeostasis	-4.06577	-1.67254	26/745	478,490,567,1193,1318,1901,2280,5028,5166,5594,7009,8031,8989,9104,10159,26872,51196,51554,55283,56477,57007,57217,79901,162514,261729,285195	ATP1A3,ATP2B1,B2M,CLIC2,SLC31A2,S1PR1,FKBP1A,P2RY1,PDK4,MAPK1,TMBIM6,NCOA4,TRPA1,RGN,ATP6AP2,STEAP1,PLCE1,ACKR4,MCOLN3,CCL28,ACKR3,TTC7A,CYBRD1,TRPV3,STEAP2,SLC9A9
19_Member	GO Biological Processes	GO:0030003	cellular cation homeostasis	-3.74715	-1.48925	23/650	478,490,1193,1318,1901,2280,5028,5594,7009,8031,8989,9104,10159,51196,51554,55283,56477,57007,57217,79901,162514,261729,285195	ATP1A3,ATP2B1,CLIC2,SLC31A2,S1PR1,FKBP1A,P2RY1,MAPK1,TMBIM6,NCOA4,TRPA1,RGN,ATP6AP2,PLCE1,ACKR4,MCOLN3,CCL28,ACKR3,TTC7A,CYBRD1,TRPV3,STEAP2,SLC9A9
19_Member	GO Biological Processes	GO:0006873	cellular ion homeostasis	-3.5872	-1.38589	23/667	478,490,1193,1318,1901,2280,5028,5594,7009,8031,8989,9104,10159,51196,51554,55283,56477,57007,57217,79901,162514,261729,285195	ATP1A3,ATP2B1,CLIC2,SLC31A2,S1PR1,FKBP1A,P2RY1,MAPK1,TMBIM6,NCOA4,TRPA1,RGN,ATP6AP2,PLCE1,ACKR4,MCOLN3,CCL28,ACKR3,TTC7A,CYBRD1,TRPV3,STEAP2,SLC9A9
19_Member	GO Biological Processes	GO:0055065	metal ion homeostasis	-3.26723	-1.18656	22/659	478,490,567,1193,1318,1901,2280,5028,7009,8031,8989,9104,26872,51196,51554,55283,56477,57007,57217,79901,162514,261729	ATP1A3,ATP2B1,B2M,CLIC2,SLC31A2,S1PR1,FKBP1A,P2RY1,TMBIM6,NCOA4,TRPA1,RGN,STEAP1,PLCE1,ACKR4,MCOLN3,CCL28,ACKR3,TTC7A,CYBRD1,TRPV3,STEAP2
19_Member	GO Biological Processes	GO:0006875	cellular metal ion homeostasis	-3.17386	-1.13849	20/582	478,490,1193,1318,1901,2280,5028,7009,8031,8989,9104,51196,51554,55283,56477,57007,57217,79901,162514,261729	ATP1A3,ATP2B1,CLIC2,SLC31A2,S1PR1,FKBP1A,P2RY1,TMBIM6,NCOA4,TRPA1,RGN,PLCE1,ACKR4,MCOLN3,CCL28,ACKR3,TTC7A,CYBRD1,TRPV3,STEAP2
19_Member	GO Biological Processes	GO:0051480	regulation of cytosolic calcium ion concentration	-2.49149	-0.759194	13/354	490,1193,1901,2280,5028,7009,8989,51196,51554,55283,56477,57007,162514	ATP2B1,CLIC2,S1PR1,FKBP1A,P2RY1,TMBIM6,TRPA1,PLCE1,ACKR4,MCOLN3,CCL28,ACKR3,TRPV3
19_Member	GO Biological Processes	GO:0007204	positive regulation of cytosolic calcium ion concentration	-2.42288	-0.729759	12/319	1193,1901,2280,5028,7009,8989,51196,51554,55283,56477,57007,162514	CLIC2,S1PR1,FKBP1A,P2RY1,TMBIM6,TRPA1,PLCE1,ACKR4,MCOLN3,CCL28,ACKR3,TRPV3
19_Member	GO Biological Processes	GO:0006874	cellular calcium ion homeostasis	-2.02851	-0.492304	14/449	490,1193,1901,2280,5028,7009,8989,9104,51196,51554,55283,56477,57007,162514	ATP2B1,CLIC2,S1PR1,FKBP1A,P2RY1,TMBIM6,TRPA1,RGN,PLCE1,ACKR4,MCOLN3,CCL28,ACKR3,TRPV3
20_Summary	Reactome Gene Sets	R-HSA-382551	Transport of small molecules	-4.64046	-1.83505	27/729	113,347,366,478,490,1193,3990,5244,6646,8989,10396,10681,11059,23568,28232,54331,55283,55356,56606,65125,79815,79895,79901,91445,162514,261729,285195	ADCY7,APOD,AQP9,ATP1A3,ATP2B1,CLIC2,LIPC,ABCB4,SOAT1,TRPA1,ATP8A1,GNB5,WWP1,ARL2BP,SLCO3A1,GNG2,MCOLN3,SLC22A15,SLC2A9,WNK1,NIPAL2,ATP8B4,CYBRD1,RNF185,TRPV3,STEAP2,SLC9A9
20_Member	Reactome Gene Sets	R-HSA-382551	Transport of small molecules	-4.64046	-1.83505	27/729	113,347,366,478,490,1193,3990,5244,6646,8989,10396,10681,11059,23568,28232,54331,55283,55356,56606,65125,79815,79895,79901,91445,162514,261729,285195	ADCY7,APOD,AQP9,ATP1A3,ATP2B1,CLIC2,LIPC,ABCB4,SOAT1,TRPA1,ATP8A1,GNB5,WWP1,ARL2BP,SLCO3A1,GNG2,MCOLN3,SLC22A15,SLC2A9,WNK1,NIPAL2,ATP8B4,CYBRD1,RNF185,TRPV3,STEAP2,SLC9A9
20_Member	Reactome Gene Sets	R-HSA-983712	Ion channel transport	-3.22874	-1.16973	10/186	478,490,1193,8989,10396,11059,55283,65125,79895,162514	ATP1A3,ATP2B1,CLIC2,TRPA1,ATP8A1,WWP1,MCOLN3,WNK1,ATP8B4,TRPV3
20_Member	Reactome Gene Sets	R-HSA-2672351	Stimuli-sensing channels	-2.18832	-0.600478	6/109	1193,8989,11059,55283,65125,162514	CLIC2,TRPA1,WWP1,MCOLN3,WNK1,TRPV3
20_Member	Reactome Gene Sets	R-HSA-3295583	TRP channels	-2.06472	-0.519913	3/28	8989,55283,162514	TRPA1,MCOLN3,TRPV3
