# Supplementary material for: Transcriptional profiling of Hutchinson-Gilford Progeria syndrome fibroblasts reveals deficits in mesenchymal stem cell commitment to differentiation related to early events in endochondral ossification
Source: eLife journal article supplement (doi:10.7554/elife.81290), 2022-12-29
Supplement: table1-data1 [file ProgeriaDEG_age_13+_de01.xlsx]

## Sheet: ProgeriaDEG_age_13+_de01
	genename	rna.norm.hgps.de05.lfc	rna.norm.hgps.de05.padj	rna.norm.hgps.de05.3bin
1	A1BG	0.0994088	0.930254	no
2	A1BG-AS1	-0.708	0.234396	no
3	A1CF	1.69116	NA	no
4	A2M	1.6528	0.250441	no
5	A2M-AS1	0.706096	0.705921	no
6	A2ML1	-2.79095	NA	no
7	A2MP1	-0.0426221	NA	no
8	A3GALT2	-2.24005	NA	no
9	A4GALT	0.339418	0.72177	no
10	A4GNT	-2.66386	NA	no
11	AA06	NA	NA	no
12	AAAS	-0.236978	0.378087	no
13	AACS	-0.116505	0.806236	no
14	AACSP1	NA	NA	no
15	AADAC	4.18662	0.160422	no
16	AADACL2	0.956389	NA	no
17	AADACL2-AS1	4.98026	0.0940634	no
18	AADACL3	-0.935709	NA	no
19	AADACL4	NA	NA	no
20	AADACP1	1.67667	NA	no
14641	MIR503HG	-3.33407	1.61669e-16	dn
22	AAED1	-0.0946356	0.914546	no
23	AAGAB	-0.0814025	0.858589	no
24	AAK1	0.428854	0.168253	no
25	AAMDC	-0.10599	0.859469	no
26	AAMP	-0.0970587	0.833834	no
27	AANAT	0.10093	NA	no
28	AAR2	-0.380657	0.201822	no
29	AARD	-1.55514	0.548865	no
30	AARS	0.154	0.79466	no
31	AARS2	0.0932505	0.8828	no
20243	RPPH1	14.4401	1.61669e-16	up
33	AASDH	0.00357458	0.995979	no
34	AASDHPPT	0.0908218	0.90001	no
35	AASS	0.679807	0.0192449	no
36	AATBC	0.580795	0.634972	no
37	AATF	-0.203219	0.604432	no
38	AATK	-0.124338	0.952174	no
39	AATK-AS1	NA	NA	no
40	ABALON	1.04783	0.0183778	no
41	ABAT	1.06602	0.130845	no
42	ABCA1	0.536775	0.48219	no
43	ABCA10	1.99293	0.215866	no
44	ABCA11P	0.108444	0.860329	no
45	ABCA12	0.391423	NA	no
46	ABCA13	-3.33515	NA	no
47	ABCA17P	0.813566	0.764485	no
48	ABCA2	0.363175	0.421567	no
49	ABCA3	1.21585	0.226194	no
50	ABCA4	-0.262669	0.764383	no
51	ABCA5	0.770325	0.142952	no
19936	RMRP	13.3352	1.80745e-13	up
53	ABCA7	0.27087	0.844803	no
8211	HIST1H4H	7.33997	7.93855e-11	up
8744	IGFBP7	2.86698	8.09664e-10	up
56	ABCA9-AS1	NA	NA	no
57	ABCB1	2.58491	0.197929	no
58	ABCB10	0.111116	0.875636	no
59	ABCB11	0.56035	NA	no
60	ABCB4	-0.524094	0.831015	no
61	ABCB5	-0.111324	NA	no
62	ABCB6	0.449348	0.211209	no
63	ABCB7	-0.0925809	0.83791	no
64	ABCB8	0.0605679	0.948255	no
65	ABCB9	0.0558332	0.968455	no
66	ABCC1	0.554684	0.20704	no
67	ABCC10	0.0998131	0.860148	no
68	ABCC11	2.20225	0.285016	no
69	ABCC12	-0.983217	NA	no
70	ABCC13	NA	NA	no
71	ABCC2	-0.654102	0.475825	no
72	ABCC3	-0.393822	0.740681	no
73	ABCC4	0.0717622	0.917522	no
74	ABCC5	-0.227199	0.35949	no
75	ABCC5-AS1	-0.523516	NA	no
76	ABCC6	1.18	0.504191	no
77	ABCC6P1	NA	NA	no
78	ABCC6P2	-0.0757373	NA	no
79	ABCC8	-2.01038	NA	no
80	ABCC9	0.871237	0.523235	no
81	ABCD1	0.3076	0.694929	no
82	ABCD2	-0.935709	NA	no
83	ABCD3	0.0759536	0.918511	no
84	ABCD4	-0.420905	0.139696	no
85	ABCE1	0.101005	0.90053	no
86	ABCF1	-0.0421123	0.944351	no
87	ABCF2	-0.0571263	0.817465	no
88	ABCF3	-0.0932829	0.846506	no
8739	IGFBP2	5.55619	8.9657e-10	up
90	ABCG2	2.90321	0.0727525	no
91	ABCG4	0.0921321	0.949279	no
92	ABCG5	-0.0426221	NA	no
93	ABCG8	NA	NA	no
94	ABHD1	-0.378598	NA	no
95	ABHD10	-0.130705	0.809634	no
96	ABHD11	-0.0763902	0.906545	no
97	ABHD11-AS1	0.160157	0.923578	no
98	ABHD12	-0.462853	0.27574	no
99	ABHD12B	0.386561	NA	no
100	ABHD13	0.428454	0.428055	no
101	ABHD14A	-0.383385	0.366066	no
102	ABHD14A-ACY1	2.44966	NA	no
103	ABHD14B	0.044501	0.954023	no
104	ABHD15	0.198291	0.542716	no
105	ABHD16A	0.260258	0.439948	no
106	ABHD16B	0.334817	0.785553	no
518	AHR	2.22767	9.48677e-10	up
108	ABHD17B	0.580904	0.158431	no
109	ABHD17C	-0.0538013	0.961019	no
110	ABHD2	0.624237	0.221645	no
111	ABHD3	-0.0572682	0.955282	no
112	ABHD4	0.253136	0.818998	no
113	ABHD5	-0.0599226	0.948545	no
114	ABHD6	-0.0409562	0.952301	no
115	ABHD8	0.468476	0.664998	no
116	ABI1	-0.394171	0.0699169	no
117	ABI2	-0.253314	0.512607	no
118	ABI3	-0.410221	0.859125	no
8181	HIST1H2BC	6.45226	1.46393e-09	up
120	ABL1	0.291726	0.627168	no
121	ABL2	0.707234	0.118285	no
122	ABLIM1	-0.459719	0.68764	no
123	ABLIM2	2.2578	0.215832	no
124	ABLIM3	-0.371499	0.351859	no
125	ABO	-0.523516	NA	no
126	ABR	0.387851	0.275059	no
127	ABRA	0.369571	NA	no
128	ABRACL	-0.110342	0.751515	no
129	ABT1	-0.0663602	0.838705	no
130	ABTB1	0.0815958	0.935066	no
131	ABTB2	0.523763	0.555189	no
132	ACAA1	-0.163048	0.860937	no
133	ACAA2	-0.232394	0.683589	no
134	ACACA	0.0387393	0.953056	no
135	ACACB	-0.402246	0.421361	no
136	ACAD10	0.00289213	0.995261	no
8168	HIST1H2AC	4.41604	5.04632e-09	up
138	ACAD8	-0.00207386	0.995038	no
139	ACAD9	-0.133358	0.654363	no
140	ACADL	1.44351	NA	no
141	ACADM	-0.237776	0.595994	no
142	ACADS	0.166943	0.774737	no
143	ACADSB	0.16568	0.733383	no
144	ACADVL	0.174744	0.667979	no
145	ACAN	3.10624	0.0743105	no
146	ACAP1	-0.0902499	0.940265	no
147	ACAP2	0.765648	0.124382	no
148	ACAP3	0.138223	0.864442	no
149	ACAT1	-0.042986	0.930583	no
19465	RAE1	-0.623716	9.00114e-07	dn
8658	IFI27	5.67931	6.63314e-09	up
152	ACBD4	0.203041	0.816224	no
153	ACBD5	0.0491891	0.953483	no
154	ACBD6	0.050687	0.933951	no
155	ACBD7	0.256099	0.837206	no
156	ACCS	0.120905	0.906046	no
157	ACCSL	-1.44054	NA	no
158	ACD	-0.432009	0.317395	no
159	ACE	-1.19068	0.201232	no
160	ACE2	-0.0426221	NA	no
161	ACER1	-0.523516	NA	no
162	ACER2	0.964552	0.304195	no
163	ACER3	-0.0789302	0.907802	no
164	ACHE	-0.377386	0.832143	no
165	ACIN1	-0.414054	0.420038	no
166	ACKR1	NA	NA	no
167	ACKR2	1.28029	NA	no
168	ACKR3	0.393744	0.787222	no
169	ACKR4	-0.0378553	0.98483	no
170	ACLY	0.24953	0.631601	no
171	ACMSD	-0.571525	NA	no
172	ACO1	0.841972	0.0781525	no
173	ACO2	0.051908	0.894198	no
20581	SCARNA2	12.6277	4.91101e-08	up
175	ACOT11	-0.596127	0.489352	no
176	ACOT12	1.86157	NA	no
177	ACOT13	0.268255	0.410114	no
178	ACOT2	0.913563	0.0689774	no
179	ACOT4	-0.536915	0.632892	no
180	ACOT6	-2.17843	NA	no
181	ACOT7	-0.239317	0.676208	no
182	ACOT8	0.103505	0.840914	no
183	ACOT9	-0.0476187	0.889799	no
8185	HIST1H2BG	6.64383	6.94392e-08	up
185	ACOX2	-0.0833087	0.891414	no
186	ACOX3	0.208659	0.437733	no
187	ACOXL	0.543469	NA	no
188	ACP1	-0.143479	0.720198	no
189	ACP2	-0.209501	0.660773	no
190	ACP5	-0.5358	0.698645	no
191	ACP6	-0.549781	0.403149	no
192	ACPP	2.34278	NA	no
193	ACPT	0.820364	NA	no
194	ACR	2.09293	NA	no
195	ACRBP	0.353237	0.899574	no
196	ACRC	-0.0219111	0.979221	no
197	ACRV1	-0.624573	0.778855	no
198	ACSBG1	0.581675	0.645249	no
199	ACSBG2	0.355119	NA	no
200	ACSF2	0.620583	0.24483	no
201	ACSF3	0.238941	0.663544	no
202	ACSL1	-0.0287376	0.9318	no
203	ACSL3	-0.105678	0.778376	no
204	ACSL4	0.191347	0.723286	no
205	ACSL5	-0.863287	0.264802	no
206	ACSL6	0.203486	NA	no
207	ACSM1	-0.935709	NA	no
208	ACSM2A	0.369571	NA	no
209	ACSM2B	NA	NA	no
210	ACSM3	-1.55848	0.380687	no
211	ACSM4	-0.0426221	NA	no
212	ACSM5	0.988166	NA	no
213	ACSM6	-0.523516	NA	no
214	ACSS1	-0.412361	0.696585	no
215	ACSS2	0.31677	0.287597	no
216	ACSS3	-0.615141	0.527282	no
217	ACTA1	0.942623	0.502593	no
218	ACTA2	1.24757	0.17966	no
219	ACTA2-AS1	0.786505	0.515049	no
220	ACTB	0.483392	0.180874	no
221	ACTBL2	2.11758	0.29641	no
222	ACTC1	-2.31996	0.197033	no
223	ACTG1	-0.0276012	0.939773	no
224	ACTG1P17	1.03933	0.636173	no
225	ACTG1P20	-0.48788	0.466628	no
226	ACTG1P4	0.625548	0.759366	no
798	ANKRD30BL	6.14888	7.48138e-08	up
228	ACTL10	0.329106	0.813964	no
229	ACTL6A	-0.68658	0.0651073	no
230	ACTL6B	-0.0426221	NA	no
231	ACTL7A	-0.632939	NA	no
232	ACTL7B	1.00887	NA	no
233	ACTL8	-0.725099	NA	no
234	ACTL9	-0.523516	NA	no
235	ACTN1	0.0462879	0.920383	no
236	ACTN1-AS1	0.319218	NA	no
237	ACTN2	-1.00605	0.723656	no
238	ACTN3	-0.039261	0.985009	no
239	ACTN4	-0.0831445	0.928157	no
240	ACTR10	-0.332989	0.478546	no
241	ACTR1A	-0.0790895	0.785609	no
242	ACTR1B	-0.127282	0.702908	no
243	ACTR2	0.189265	0.769074	no
244	ACTR3	0.145252	0.795621	no
245	ACTR3B	-0.233105	0.774402	no
246	ACTR3BP2	NA	NA	no
247	ACTR3BP5	NA	NA	no
248	ACTR3C	0.308174	NA	no
249	ACTR5	-0.277197	0.383267	no
250	ACTR6	-0.155613	0.851738	no
251	ACTR8	-0.0670356	0.871557	no
252	ACTRT1	NA	NA	no
253	ACTRT2	-2.31943	NA	no
254	ACTRT3	0.289301	0.669527	no
255	ACVR1	-0.0310486	0.956244	no
256	ACVR1B	-0.00993877	0.987647	no
257	ACVR1C	1.85089	0.0741381	no
258	ACVR2A	0.78391	0.1787	no
259	ACVR2B	0.674371	0.28243	no
260	ACVR2B-AS1	0.261025	0.884971	no
261	ACVRL1	0.0951388	0.950275	no
262	ACY1	1.68479	0.0537248	no
263	ACY3	-0.523516	NA	no
264	ACYP1	-0.369654	0.573102	no
265	ACYP2	0.423441	0.60344	no
266	ADA	-0.290636	0.60641	no
267	ADAD1	NA	NA	no
268	ADAD2	0.369571	NA	no
269	ADAL	-0.351849	0.482156	no
270	ADAM10	0.16486	0.741605	no
271	ADAM11	0.196498	0.884611	no
272	ADAM12	0.505654	0.569343	no
273	ADAM15	0.032	0.973641	no
274	ADAM17	0.0400475	0.925326	no
275	ADAM18	NA	NA	no
276	ADAM19	-0.24346	0.753177	no
277	ADAM1A	0.154475	0.757503	no
278	ADAM2	-0.523516	NA	no
279	ADAM20	3.67631	0.0230613	no
280	ADAM20P1	1.43939	0.398464	no
281	ADAM21	0.574709	0.701656	no
282	ADAM21P1	0.742971	NA	no
283	ADAM22	-0.919872	0.404275	no
284	ADAM23	0.70795	0.538485	no
285	ADAM28	-3.29925	0.0225667	no
286	ADAM29	-0.0426221	NA	no
287	ADAM30	NA	NA	no
288	ADAM32	-0.396045	0.741605	no
289	ADAM33	-0.168119	0.891978	no
290	ADAM3A	-0.935709	NA	no
291	ADAM5	NA	NA	no
292	ADAM6	-0.0426221	NA	no
293	ADAM7	NA	NA	no
294	ADAM8	0.818017	0.297245	no
295	ADAM9	0.450144	0.158836	no
296	ADAMDEC1	0.369571	NA	no
16664	NR3C2	2.85176	1.24378e-07	up
298	ADAMTS10	0.858391	0.187868	no
299	ADAMTS12	1.11304	0.0886919	no
300	ADAMTS13	1.1205	0.0663619	no
301	ADAMTS14	0.812172	0.28117	no
8208	HIST1H4E	10.0182	1.86943e-07	up
303	ADAMTS16	1.84621	0.419469	no
304	ADAMTS17	-0.630687	0.797998	no
305	ADAMTS18	-0.573108	NA	no
306	ADAMTS19	-0.688709	NA	no
307	ADAMTS19-AS1	-0.0426221	NA	no
308	ADAMTS2	0.388401	0.310468	no
309	ADAMTS20	-0.935709	NA	no
310	ADAMTS3	2.74721	0.0114471	no
311	ADAMTS4	0.927655	0.347528	no
312	ADAMTS5	0.0446834	0.972921	no
313	ADAMTS6	0.605442	0.234566	no
21862	SNORA73B	8.68861	1.86943e-07	up
315	ADAMTS7P1	0.383029	NA	no
316	ADAMTS8	0.555926	0.885687	no
317	ADAMTS9	1.39088	0.382145	no
318	ADAMTS9-AS1	2.32457	NA	no
319	ADAMTS9-AS2	0.315406	0.860937	no
320	ADAMTSL1	0.248252	0.808218	no
321	ADAMTSL2	1.37506	0.53031	no
322	ADAMTSL3	2.50781	0.152896	no
323	ADAMTSL4	-0.943473	0.246053	no
324	ADAMTSL4-AS1	1.34928	0.304654	no
325	ADAMTSL5	0.110326	0.858589	no
4042	CPEB2	1.69207	5.05571e-07	up
327	ADAP2	2.10738	0.0922447	no
328	ADAR	-0.026029	0.950696	no
20866	SERPING1	-2.24548	1.2485e-06	dn
330	ADARB2	-0.777068	NA	no
331	ADARB2-AS1	-0.0426221	NA	no
332	ADAT1	-0.147607	0.75111	no
333	ADAT2	-0.194493	0.741605	no
334	ADAT3	0.218813	0.882555	no
335	ADCK1	0.272009	0.656579	no
336	ADCK2	0.429528	0.459491	no
337	ADCK3	0.0237106	0.974426	no
338	ADCK4	-0.0117732	0.989996	no
339	ADCK5	0.249366	0.648915	no
340	ADCY1	0.214091	0.856486	no
341	ADCY10	0.985586	0.596887	no
342	ADCY10P1	-0.44511	0.663227	no
343	ADCY2	-0.00241848	0.999635	no
344	ADCY3	-0.260606	0.596887	no
345	ADCY4	1.11033	0.48125	no
346	ADCY5	-0.0702032	0.948545	no
347	ADCY6	0.639186	0.0331036	no
348	ADCY7	-0.0912788	0.944351	no
349	ADCY8	2.1625	0.464817	no
350	ADCY9	0.865227	0.123604	no
351	ADCYAP1	-1.18887	NA	no
352	ADCYAP1R1	-2.88707	NA	no
353	ADD1	0.0620859	0.887036	no
354	ADD2	-2.50534	0.252882	no
355	ADD3	0.534073	0.395395	no
20574	SCARNA12	6.22901	6.18056e-07	up
357	ADGB	-0.0426221	NA	no
358	ADGRA1	-0.983178	NA	no
359	ADGRA1-AS1	NA	NA	no
360	ADGRA2	-0.226266	0.817119	no
361	ADGRA3	-0.167417	0.785609	no
362	ADGRB1	-0.332945	0.882227	no
363	ADGRB2	0.796507	0.170077	no
364	ADGRB3	0.113547	NA	no
365	ADGRD1	0.738042	0.538804	no
366	ADGRE1	-2.39683	NA	no
367	ADGRE2	0.178849	0.946971	no
368	ADGRE3	0.369571	NA	no
369	ADGRE4P	NA	NA	no
370	ADGRE5	-0.985929	0.0778922	no
371	ADGRF1	-3.30771	NA	no
372	ADGRF2	-0.935709	NA	no
373	ADGRF3	0.169846	0.867162	no
374	ADGRF4	3.64311	0.393007	no
375	ADGRF5	-1.52874	0.424207	no
376	ADGRG1	-0.984948	0.292841	no
24193	TRIM16	1.16899	7.68973e-07	up
378	ADGRG3	0.369571	NA	no
379	ADGRG4	0.355364	NA	no
380	ADGRG5	-0.935709	NA	no
381	ADGRG6	-0.19088	0.935799	no
382	ADGRG7	0.369571	NA	no
383	ADGRL1	0.465247	0.433707	no
384	ADGRL2	0.93795	0.314712	no
385	ADGRL3	1.98509	NA	no
386	ADGRL3-AS1	NA	NA	no
387	ADGRL4	0.0120644	0.995038	no
388	ADGRV1	-0.523516	NA	no
389	ADH1A	1.2302	NA	no
390	ADH1B	2.60177	0.288519	no
391	ADH1C	1.01854	0.775476	no
392	ADH4	2.1521	NA	no
393	ADH5	0.00168716	0.997636	no
394	ADH6	0.221276	0.943715	no
395	ADH7	NA	NA	no
396	ADHFE1	0.555014	0.516732	no
397	ADI1	0.140271	0.68685	no
398	ADIG	NA	NA	no
399	ADIPOQ	NA	NA	no
400	ADIPOQ-AS1	NA	NA	no
401	ADIPOR1	0.0347048	0.949834	no
402	ADIPOR2	-0.416149	0.0137415	no
403	ADIRF	0.275192	0.785641	no
404	ADK	-0.413969	0.370173	no
405	ADM	-0.630845	0.411037	no
406	ADM2	0.14342	0.939773	no
407	ADM5	0.587421	0.625176	no
408	ADNP	-0.267098	0.236116	no
409	ADNP-AS1	-0.356799	0.657845	no
410	ADNP2	0.384906	0.163962	no
411	ADO	0.233087	0.451836	no
412	ADORA1	-1.21863	0.275742	no
413	ADORA2A	-2.81198	NA	no
414	ADORA2A-AS1	0.154846	0.951089	no
415	ADORA2B	0.541741	0.513759	no
416	ADORA3	-1.4602	NA	no
417	ADPGK	-0.51937	0.169153	no
418	ADPGK-AS1	1.39099	0.46566	no
419	ADPRH	-0.313807	0.791588	no
420	ADPRHL1	-0.531636	0.22288	no
421	ADPRHL2	-0.131541	0.676357	no
422	ADPRM	0.0314651	0.960272	no
423	ADRA1A	-2.47622	NA	no
424	ADRA1B	0.149667	0.901757	no
425	ADRA1D	0.0788044	0.965449	no
426	ADRA2A	-0.950411	0.591184	no
427	ADRA2B	-0.503841	0.873402	no
8171	HIST1H2AG	7.26958	8.72108e-07	up
429	ADRB1	-1.82025	0.456565	no
430	ADRB2	1.20442	0.0762828	no
431	ADRB3	-0.523516	NA	no
432	ADRBK1	0.103089	0.839476	no
433	ADRBK2	0.874149	0.414794	no
434	ADRM1	0.0246154	0.971283	no
435	ADSL	-0.111673	0.662643	no
436	ADSS	-0.11905	0.777109	no
437	ADSSL1	0.210513	0.850633	no
438	ADTRP	0.887523	0.426325	no
439	AEBP1	-0.0564977	0.96272	no
440	AEBP2	0.447759	0.420038	no
441	AEN	0.301175	0.249523	no
442	AES	-0.118256	0.900501	no
23688	TMEM178A	3.04528	8.72108e-07	up
21823	SNORA48	10.0309	8.96219e-07	up
445	AFAP1L1	0.735205	0.0762181	no
446	AFAP1L2	0.285795	0.890893	no
447	AFF1	0.0956677	0.79579	no
448	AFF2	-0.174405	0.924981	no
8201	HIST1H3H	7.79435	8.99713e-07	up
450	AFF4	0.38715	0.351859	no
451	AFG3L1P	-0.208585	0.580915	no
452	AFG3L2	0.218147	0.270259	no
453	AFM	NA	NA	no
454	AFMID	0.0621187	0.933942	no
455	AFP	-1.66295	0.0206997	no
456	AFTPH	0.0184999	0.974628	no
457	AGA	-0.042402	0.945754	no
458	AGAP1	0.395772	0.275977	no
459	AGAP1-IT1	-0.0129396	0.995073	no
460	AGAP11	-0.122156	0.871875	no
461	AGAP2	0.364513	0.784448	no
462	AGAP2-AS1	-0.0192689	0.983289	no
463	AGAP3	0.156323	0.830638	no
464	AGAP4	1.26415	0.180874	no
465	AGAP5	1.07171	0.0962156	no
466	AGAP6	0.838105	0.0772871	no
467	AGAP7P	-2.43991	NA	no
468	AGAP9	3.59084	0.202341	no
469	AGBL1	-0.935709	NA	no
470	AGBL1-AS1	NA	NA	no
471	AGBL2	0.0394939	0.985325	no
472	AGBL3	0.6554	0.636116	no
473	AGBL4	-0.935709	NA	no
474	AGBL4-IT1	NA	NA	no
475	AGBL5	-0.143952	0.783068	no
476	AGBL5-AS1	-0.634161	NA	no
477	AGER	-0.579358	0.389288	no
478	AGFG1	0.191745	0.363681	no
479	AGFG2	0.473141	0.480431	no
480	AGGF1	0.143427	0.678613	no
481	AGK	-0.284921	0.439948	no
482	AGL	0.558276	0.221645	no
483	AGMAT	0.0794249	0.918452	no
484	AGMO	4.30646	0.0699687	no
485	AGO1	0.618096	0.153027	no
486	AGO2	1.26385	0.0330627	no
487	AGO3	0.586003	0.281166	no
488	AGO4	-0.152112	0.775349	no
489	AGPAT1	-0.137098	0.81997	no
490	AGPAT2	-0.335951	0.601049	no
491	AGPAT3	-0.0374657	0.95655	no
492	AGPAT4	-0.261034	0.617938	no
493	AGPAT4-IT1	-0.183016	0.845195	no
494	AGPAT5	-0.162473	0.820851	no
495	AGPAT6	-0.111825	0.743258	no
496	AGPAT9	-1.20984	0.407246	no
497	AGPS	0.360084	0.504438	no
498	AGR2	NA	NA	no
499	AGR3	NA	NA	no
500	AGRN	1.29729	0.0224121	no
501	AGRP	0.069472	NA	no
502	AGT	2.30923	0.115778	no
503	AGTPBP1	0.675997	0.0831952	no
19329	QPRT	-3.23649	1.35553e-06	dn
505	AGTR2	NA	NA	no
506	AGTRAP	-0.365994	0.579587	no
507	AGXT	-0.635812	NA	no
508	AGXT2	NA	NA	no
509	AHCTF1	0.387761	0.630308	no
510	AHCTF1P1	-0.601625	0.732397	no
511	AHCY	0.00333383	0.994598	no
512	AHCYL1	-0.161875	0.467485	no
513	AHCYL2	0.176225	0.704938	no
514	AHDC1	-0.220325	0.815641	no
515	AHI1	0.0170943	0.982647	no
516	AHNAK	0.82579	0.267489	no
517	AHNAK2	1.18683	0.20046	no
297	ADAMTS1	1.90167	9.00114e-07	up
519	AHRR	0.258569	0.599356	no
520	AHSA1	-0.162476	0.678613	no
521	AHSA2	0.175607	0.714046	no
522	AHSG	0.523988	NA	no
523	AHSP	NA	NA	no
524	AICDA	0.936757	NA	no
525	AIDA	0.789291	0.315647	no
526	AIF1	-0.523516	NA	no
527	AIF1L	0.7023	0.779654	no
528	AIFM1	-0.243616	0.621597	no
529	AIFM2	0.0760074	0.945754	no
530	AIFM3	1.40636	0.294914	no
531	AIG1	-0.24147	0.622685	no
532	AIM1	-0.162141	0.913839	no
533	AIM1L	-1.1788	NA	no
534	AIM2	-3.33162	0.186761	no
535	AIMP1	-0.395046	0.222644	no
536	AIMP2	0.278062	0.48589	no
537	AIP	0.231358	0.632892	no
538	AIPL1	0.16339	NA	no
539	AIRE	-0.0568017	0.984607	no
540	AIRN	2.6548	NA	no
541	AJAP1	1.51436	0.398974	no
542	AJUBA	0.283336	0.641741	no
543	AK1	0.0535016	0.938405	no
544	AK2	0.00949383	0.98483	no
545	AK3	0.546631	0.0916953	no
546	AK4	0.675696	0.643179	no
547	AK5	0.44694	0.372932	no
548	AK6	-0.317695	0.595314	no
549	AK7	-0.425768	0.893802	no
550	AK8	-0.0682198	0.971962	no
551	AK9	0.385978	0.740872	no
552	AKAP1	-0.0369842	0.950167	no
553	AKAP10	0.107517	0.849082	no
554	AKAP11	0.235504	0.754104	no
555	AKAP12	2.22104	0.010316	no
556	AKAP13	0.492183	0.317395	no
557	AKAP14	-0.523516	NA	no
558	AKAP17A	NA	NA	no
559	AKAP2	1.55405	0.0886337	no
560	AKAP3	0.0948357	0.961346	no
561	AKAP4	NA	NA	no
562	AKAP5	0.218694	0.876938	no
563	AKAP6	0.0998149	0.96527	no
564	AKAP7	-0.281107	0.698457	no
565	AKAP8	0.155198	0.590486	no
566	AKAP8L	0.364189	0.322967	no
567	AKAP9	0.499832	0.0845807	no
568	AKIP1	0.253905	0.51111	no
569	AKIRIN1	0.402855	0.260563	no
570	AKIRIN2	-0.554441	0.110387	no
571	AKNA	-0.552092	0.420038	no
572	AKNAD1	0.253327	NA	no
573	AKR1A1	0.401785	0.425065	no
574	AKR1B1	-0.0391395	0.967028	no
575	AKR1B10	4.15627	0.121058	no
576	AKR1B15	1.65147	NA	no
577	AKR1C1	-0.520293	0.420415	no
578	AKR1C2	0.470918	0.486694	no
579	AKR1C3	2.06501	0.0781816	no
580	AKR1C4	NA	NA	no
581	AKR1C6P	0.522506	NA	no
582	AKR1C8P	-0.935709	NA	no
583	AKR1D1	NA	NA	no
584	AKR1E2	-0.131568	0.910323	no
585	AKR7A2	0.0414987	0.950696	no
586	AKR7A2P1	2.12622	0.0838386	no
587	AKR7A3	-0.0557357	0.972787	no
588	AKR7L	1.08294	0.442413	no
589	AKT1	-0.402164	0.320585	no
590	AKT1S1	-0.211332	0.861729	no
591	AKT2	-0.183216	0.747377	no
592	AKT3	0.0710629	0.916707	no
593	AKTIP	0.536661	0.379811	no
594	ALAD	-0.380216	0.407129	no
595	ALAS1	-0.187987	0.711118	no
596	ALAS2	-0.983199	NA	no
597	ALB	3.30151	0.101736	no
598	ALCAM	-0.0139123	0.986806	no
599	ALDH16A1	0.106781	0.929209	no
600	ALDH18A1	0.246383	0.222618	no
601	ALDH1A1	-2.57534	0.216304	no
602	ALDH1A2	-1.5184	0.723622	no
603	ALDH1A3	-0.828196	0.490251	no
604	ALDH1B1	0.449099	0.644355	no
605	ALDH1L1	-0.694143	NA	no
606	ALDH1L1-AS1	NA	NA	no
607	ALDH1L1-AS2	-0.0426221	NA	no
608	ALDH1L2	0.0575949	0.934956	no
609	ALDH2	0.490745	0.518349	no
610	ALDH3A1	0.134248	0.956398	no
611	ALDH3A2	-0.0659632	0.917522	no
612	ALDH3B1	0.404416	0.533675	no
613	ALDH3B2	-0.889594	NA	no
614	ALDH4A1	0.179274	0.757503	no
615	ALDH5A1	2.30564	0.0112062	no
616	ALDH6A1	0.9963	0.0442672	no
17653	PAX3	-4.53992	1.40201e-06	dn
618	ALDH8A1	1.41142	0.355191	no
619	ALDH9A1	-0.0570077	0.897569	no
620	ALDOA	-0.0684539	0.884047	no
621	ALDOB	1.86506	NA	no
622	ALDOC	-1.07876	0.151036	no
623	ALG1	-0.0330597	0.955266	no
624	ALG10	0.694497	0.486668	no
625	ALG10B	0.722208	0.452837	no
626	ALG11	0.516963	0.391477	no
627	ALG12	0.23739	0.622938	no
628	ALG13	-0.136036	0.748779	no
629	ALG14	-0.373707	0.080263	no
630	ALG1L	-1.68428	NA	no
631	ALG1L2	-0.0426221	NA	no
632	ALG1L9P	0.475943	0.802095	no
633	ALG2	0.356959	0.0499484	no
634	ALG3	0.0529709	0.952299	no
635	ALG5	-0.121924	0.763705	no
636	ALG6	-0.529754	0.281166	no
637	ALG8	-0.638509	0.0395936	no
638	ALG9	-0.391053	0.15339	no
639	ALK	0.192515	0.93973	no
640	ALKBH1	-0.477223	0.0484543	no
641	ALKBH2	-0.139191	0.77919	no
642	ALKBH3	-0.083707	0.863122	no
643	ALKBH3-AS1	1.73597	NA	no
644	ALKBH4	-0.0730767	0.882833	no
645	ALKBH5	0.55624	0.0754378	no
646	ALKBH6	0.726305	0.0645035	no
647	ALKBH7	0.288945	0.772883	no
648	ALKBH8	-0.108242	0.878375	no
649	ALLC	3.40234	0.259883	no
650	ALMS1	0.0946408	0.939773	no
651	ALMS1-IT1	0.775237	0.566548	no
652	ALMS1P	-1.03636	NA	no
653	ALOX12	-0.340354	0.8669	no
654	ALOX12-AS1	0.693832	0.421637	no
655	ALOX12B	-0.0426221	NA	no
656	ALOX12P2	1.90488	NA	no
657	ALOX15	-2.85234	NA	no
658	ALOX15B	-1.15441	NA	no
659	ALOX15P1	-1.39445	NA	no
660	ALOX5	-3.12043	NA	no
661	ALOX5AP	-0.717739	NA	no
662	ALOXE3	-0.318461	0.914466	no
663	ALPI	0.369571	NA	no
664	ALPK1	-0.0870545	0.891978	no
665	ALPK2	0.715174	0.0741381	no
666	ALPK3	-0.0687292	0.958338	no
667	ALPL	2.33511	0.148996	no
668	ALPP	-0.0426221	NA	no
669	ALPPL2	-0.0426221	NA	no
670	ALS2	0.266831	0.458521	no
671	ALS2CL	0.258443	0.818361	no
672	ALS2CR11	-0.232614	0.882315	no
673	ALS2CR12	0.0246555	0.986841	no
674	ALX1	-0.0426221	NA	no
675	ALX3	-0.0792296	0.918521	no
676	ALX4	-2.28758	0.0585128	no
677	ALYREF	-0.182349	0.831015	no
678	AMACR	0.292713	0.743118	no
679	AMBN	NA	NA	no
680	AMBP	0.61168	NA	no
681	AMBRA1	0.284313	0.608717	no
682	AMD1	-0.574089	0.216266	no
683	AMDHD1	1.20852	0.622448	no
684	AMDHD2	-0.0376988	0.970853	no
685	AMELX	NA	NA	no
686	AMELY	NA	NA	no
687	AMER1	0.197639	0.767397	no
688	AMER2	-0.978857	0.689619	no
689	AMER3	-0.523516	NA	no
690	AMFR	0.600547	0.0206959	no
691	AMH	-0.431426	0.775349	no
692	AMHR2	NA	NA	no
693	AMICA1	NA	NA	no
694	AMIGO1	0.320694	0.770951	no
695	AMIGO2	-0.839848	0.274437	no
696	AMIGO3	0.255103	0.706079	no
697	AMMECR1	0.60043	0.053345	no
698	AMMECR1L	0.0572942	0.882217	no
699	AMN	-0.58989	0.87277	no
700	AMN1	0.250041	0.825123	no
701	AMOT	0.224202	0.856094	no
702	AMOTL1	0.758445	0.0406401	no
703	AMOTL2	0.850302	0.0395936	no
704	AMPD1	0.572716	NA	no
705	AMPD2	0.089043	0.863349	no
706	AMPD3	0.15419	0.854027	no
707	AMPH	-1.05797	0.537076	no
708	AMT	0.986227	0.0721383	no
709	AMTN	-0.0426221	NA	no
710	AMY1A	NA	NA	no
711	AMY1B	NA	NA	no
712	AMY1C	NA	NA	no
713	AMY2A	NA	NA	no
714	AMY2B	0.498716	0.663989	no
715	AMZ1	-0.608595	0.785928	no
716	AMZ2	-0.312196	0.36621	no
717	AMZ2P1	0.251445	0.755834	no
718	ANAPC1	0.461234	0.495773	no
719	ANAPC10	-0.147889	0.867845	no
720	ANAPC11	-0.0233223	0.973641	no
721	ANAPC13	0.000336992	0.999635	no
722	ANAPC15	-0.179853	0.641329	no
723	ANAPC16	0.0119779	0.98182	no
724	ANAPC1P1	-0.165043	NA	no
725	ANAPC2	-0.299176	0.722969	no
726	ANAPC4	-0.107572	0.865037	no
727	ANAPC5	-0.100409	0.777102	no
728	ANAPC7	-0.187465	0.463903	no
729	ANG	-0.617515	0.128873	no
730	ANGEL1	0.158116	0.847074	no
731	ANGEL2	0.190942	0.712805	no
732	ANGPT1	0.351806	0.766425	no
733	ANGPT2	2.36106	0.0190015	no
734	ANGPT4	0.88673	0.712011	no
735	ANGPTL1	1.38185	0.195447	no
736	ANGPTL2	-0.529249	0.551021	no
737	ANGPTL3	3.95548	0.0287865	no
738	ANGPTL4	0.780593	0.484941	no
739	ANGPTL5	1.3117	0.611146	no
740	ANGPTL6	0.380498	0.847833	no
741	ANGPTL7	2.53063	0.161657	no
742	ANHX	NA	NA	no
743	ANK1	1.67339	0.0558006	no
744	ANK2	0.836841	0.246053	no
21143	SLC12A2	1.36121	1.00731e-06	up
746	ANKAR	0.410712	0.575558	no
747	ANKDD1A	-0.269227	0.695749	no
748	ANKDD1B	0.626094	0.744498	no
749	ANKEF1	-0.131895	0.941758	no
750	ANKFN1	0.436552	0.889799	no
751	ANKFY1	-0.00387606	0.991527	no
752	ANKH	0.988604	0.231768	no
753	ANKHD1	0.0165271	0.985001	no
754	ANKHD1-EIF4EBP3	0.000169025	0.999807	no
755	ANKIB1	0.161362	0.766052	no
756	ANKK1	0.714818	NA	no
757	ANKLE1	-0.397922	0.702836	no
758	ANKLE2	-0.107095	0.634972	no
759	ANKMY1	-0.010668	0.988691	no
760	ANKMY2	-0.185412	0.751772	no
761	ANKRA2	0.11227	0.869412	no
762	ANKRD1	2.3736	0.0497002	no
763	ANKRD10	0.252661	0.592636	no
764	ANKRD11	0.0759778	0.941325	no
765	ANKRD12	0.214138	0.590521	no
766	ANKRD13A	-0.338804	0.585242	no
767	ANKRD13B	0.457561	0.624787	no
768	ANKRD13C	0.485823	0.0767624	no
769	ANKRD13D	0.176424	0.684106	no
770	ANKRD16	-0.28843	0.725515	no
771	ANKRD17	0.352801	0.287146	no
772	ANKRD18A	0.956389	NA	no
773	ANKRD18B	1.28473	0.278063	no
774	ANKRD18DP	-0.615669	NA	no
775	ANKRD19P	1.14554	0.124382	no
776	ANKRD2	-1.22401	0.624346	no
777	ANKRD20A1	NA	NA	no
778	ANKRD20A11P	-2.49092	NA	no
779	ANKRD20A12P	3.21595	NA	no
780	ANKRD20A19P	0.369571	NA	no
781	ANKRD20A2	NA	NA	no
782	ANKRD20A3	NA	NA	no
783	ANKRD20A4	-0.935709	NA	no
784	ANKRD20A5P	2.52858	NA	no
785	ANKRD20A8P	NA	NA	no
786	ANKRD20A9P	-2.05266	NA	no
787	ANKRD22	-0.983462	NA	no
788	ANKRD23	0.247699	0.624671	no
789	ANKRD24	1.81231	0.0600229	no
790	ANKRD26	-0.205434	0.699622	no
791	ANKRD26P1	0.439646	0.883188	no
792	ANKRD26P3	-0.935709	NA	no
793	ANKRD27	-0.111845	0.813466	no
794	ANKRD28	0.179591	0.685227	no
795	ANKRD29	-0.0843221	0.958338	no
796	ANKRD30A	NA	NA	no
797	ANKRD30B	3.01596	0.124164	no
8161	HIST1H1B	9.87656	1.16517e-06	up
799	ANKRD30BP2	-0.935709	NA	no
800	ANKRD30BP3	NA	NA	no
801	ANKRD31	0.136537	0.948362	no
802	ANKRD32	-0.530884	0.549965	no
803	ANKRD33	-0.935709	NA	no
804	ANKRD33B	1.30861	0.234225	no
805	ANKRD34A	-0.253875	0.79633	no
806	ANKRD34B	0.475498	NA	no
807	ANKRD34C	-0.0426221	NA	no
808	ANKRD34C-AS1	NA	NA	no
809	ANKRD35	-0.544288	0.62487	no
810	ANKRD36	0.986975	0.333137	no
811	ANKRD36B	1.47665	0.0932792	no
812	ANKRD36BP1	1.827	0.011736	no
813	ANKRD36BP2	-2.05407	NA	no
814	ANKRD36C	1.42297	0.149765	no
815	ANKRD37	1.68285	0.108396	no
816	ANKRD39	-0.277359	0.652016	no
817	ANKRD40	0.112537	0.795084	no
818	ANKRD42	0.359895	0.27527	no
819	ANKRD44	1.02203	0.0345915	no
820	ANKRD44-IT1	2.63791	NA	no
821	ANKRD45	1.78261	NA	no
822	ANKRD46	0.846975	0.165332	no
823	ANKRD49	-0.32632	0.557374	no
824	ANKRD50	0.525504	0.123568	no
825	ANKRD52	-0.0899896	0.893794	no
826	ANKRD53	-0.498169	0.772017	no
827	ANKRD54	0.215988	0.49497	no
828	ANKRD55	-0.164386	NA	no
829	ANKRD6	0.0335677	0.979221	no
830	ANKRD60	-0.523516	NA	no
831	ANKRD61	0.0298779	0.985009	no
832	ANKRD62	-0.0426221	NA	no
833	ANKRD62P1-PARP4P3	-0.927124	NA	no
834	ANKRD63	4.76116	0.0109145	no
835	ANKRD65	-1.03503	0.150821	no
836	ANKRD66	NA	NA	no
837	ANKRD7	-0.97513	NA	no
838	ANKRD9	0.623414	0.610613	no
839	ANKS1A	0.281724	0.448172	no
840	ANKS1B	0.907723	0.728367	no
841	ANKS3	0.274314	0.686096	no
842	ANKS4B	-0.935709	NA	no
843	ANKS6	0.151013	0.757725	no
844	ANKUB1	-0.523516	NA	no
845	ANKZF1	-0.208794	0.538117	no
846	ANLN	-1.54177	0.0479537	no
847	ANO1	-0.389047	0.846872	no
848	ANO1-AS2	-0.935709	NA	no
23610	TMEM106C	-1.34103	3.08874e-06	dn
850	ANO2	-2.25449	NA	no
851	ANO3	-1.65693	0.188098	no
852	ANO4	-1.05533	0.585242	no
853	ANO5	-1.4602	NA	no
854	ANO6	0.00407453	0.994598	no
855	ANO7	-0.643973	0.350993	no
856	ANO8	0.102545	0.914546	no
857	ANO9	1.00649	NA	no
858	ANOS1	5.12826	0.023286	no
859	ANP32A	-0.409996	0.122009	no
860	ANP32A-IT1	0.414627	0.826567	no
861	ANP32AP1	-0.0312149	0.988755	no
862	ANP32B	-1.12104	0.187677	no
863	ANP32C	0.305753	NA	no
864	ANP32D	-1.4602	NA	no
865	ANP32E	-0.911787	0.0354135	no
866	ANPEP	-1.02148	0.226871	no
867	ANTXR1	-0.220112	0.702517	no
868	ANTXR2	0.33079	0.415471	no
869	ANTXRL	NA	NA	no
870	ANTXRLP1	NA	NA	no
871	ANXA1	-0.592188	0.266994	no
872	ANXA10	5.01574	0.0245326	no
873	ANXA11	0.137646	0.861566	no
874	ANXA13	-0.157678	NA	no
875	ANXA2	0.088958	0.901794	no
876	ANXA2P1	0.542173	0.544481	no
877	ANXA2P2	1.08805	0.0359283	no
878	ANXA2P3	-0.980065	0.409142	no
879	ANXA2R	0.370464	0.694426	no
880	ANXA3	1.42443	0.465662	no
881	ANXA4	-0.137497	0.721523	no
882	ANXA5	0.0265186	0.968333	no
883	ANXA6	-0.154286	0.567155	no
884	ANXA7	-0.0876061	0.775744	no
885	ANXA8	1.53166	0.618351	no
886	ANXA8L1	1.56196	0.497465	no
887	ANXA9	0.979548	0.471948	no
888	AOAH	NA	NA	no
889	AOAH-IT1	NA	NA	no
890	AOC1	1.03775	NA	no
891	AOC2	0.480701	0.605764	no
892	AOC3	0.594967	0.757337	no
893	AOC4P	-0.0426221	NA	no
894	AOX1	1.04312	0.36248	no
895	AOX2P	NA	NA	no
896	AP1AR	0.293265	0.518447	no
897	AP1B1	0.170139	0.77971	no
898	AP1B1P1	-0.0426221	NA	no
899	AP1G1	0.107198	0.781815	no
900	AP1G2	-0.510744	0.558247	no
901	AP1M1	0.134455	0.809274	no
902	AP1M2	1.15368	0.639005	no
903	AP1S1	0.0295087	0.959775	no
904	AP1S2	-0.274024	0.771283	no
20591	SCARNA7	11.2188	1.17725e-06	up
906	AP2A1	0.44476	0.371925	no
907	AP2A2	-0.0494151	0.946701	no
908	AP2B1	-0.343481	0.20886	no
909	AP2M1	-0.147617	0.711504	no
910	AP2S1	0.19456	0.746469	no
911	AP3B1	-0.107674	0.783068	no
912	AP3B2	0.9922	0.543098	no
913	AP3D1	0.127436	0.841856	no
914	AP3M1	0.0525422	0.936008	no
915	AP3M2	0.636621	0.348875	no
916	AP3S1	0.195112	0.728583	no
917	AP3S2	0.846769	0.0369669	no
918	AP4B1	-0.0315018	0.950696	no
919	AP4B1-AS1	-0.427929	0.669984	no
920	AP4E1	0.250782	0.650188	no
921	AP4M1	-0.200277	0.658848	no
922	AP4S1	0.392279	0.284051	no
923	AP5B1	0.355254	0.381875	no
924	AP5M1	0.127586	0.862947	no
925	AP5S1	0.338257	0.499659	no
926	AP5Z1	0.160576	0.838495	no
927	APAF1	-0.00429603	0.996175	no
928	APBA1	0.290205	0.730536	no
929	APBA2	2.29408	0.112871	no
930	APBA3	0.222539	0.775453	no
931	APBB1	0.0914833	0.858589	no
932	APBB1IP	0.210674	0.906081	no
933	APBB2	0.562642	0.233959	no
934	APBB3	0.186073	0.70876	no
935	APC	0.27694	0.800865	no
936	APC2	0.935623	0.218099	no
937	APCDD1	-0.547342	0.801394	no
938	APCDD1L	-0.505235	0.668974	no
939	APCDD1L-AS1	-0.153858	0.933565	no
940	APCS	-0.0426221	NA	no
941	APEH	0.265643	0.364173	no
942	APELA	-0.935709	NA	no
943	APEX1	-0.704888	0.125408	no
16632	NPTX2	-4.3242	3.92663e-06	dn
22263	SOX7	-4.73894	3.92663e-06	dn
946	APH1B	-0.0342455	0.960351	no
947	API5	-0.0759131	0.914448	no
948	APIP	0.076477	0.944403	no
949	APITD1	-0.229361	0.713973	no
950	APITD1-CORT	1.7547	0.416308	no
951	APLF	0.213836	0.737848	no
952	APLN	2.13491	0.0736747	no
953	APLNR	-2.97785	0.0516615	no
954	APLP1	-0.197414	0.744127	no
955	APLP2	0.109841	0.856692	no
24006	TOE1	-0.834492	4.39741e-06	dn
957	APOA1	0.7278	0.701656	no
958	APOA1-AS	0.152878	NA	no
959	APOA1BP	0.346364	0.416947	no
960	APOA2	1.24743	NA	no
961	APOA4	-1.41729	NA	no
962	APOA5	-0.111457	NA	no
963	APOB	2.64752	0.200061	no
964	APOBEC1	NA	NA	no
965	APOBEC2	0.314863	NA	no
966	APOBEC3A	NA	NA	no
967	APOBEC3A_B	NA	NA	no
4599	DBF4B	-1.77102	8.37011e-06	dn
969	APOBEC3B-AS1	NA	NA	no
970	APOBEC3C	-0.650991	0.238245	no
971	APOBEC3D	-0.0431918	0.971644	no
972	APOBEC3F	-0.158554	0.876227	no
973	APOBEC3G	-0.908259	0.13907	no
974	APOBEC3H	-1.31703	NA	no
975	APOBEC4	2.90747	0.275496	no
976	APOBR	-0.630795	0.841852	no
977	APOC1	-1.87229	0.0485919	no
978	APOC1P1	NA	NA	no
979	APOC2	NA	NA	no
980	APOC3	1.39628	NA	no
981	APOC4	NA	NA	no
982	APOC4-APOC2	NA	NA	no
983	APOD	1.10365	0.452837	no
984	APOE	1.79159	0.0293724	no
985	APOF	1.01044	NA	no
986	APOH	0.285296	NA	no
987	APOL1	0.395905	0.796891	no
988	APOL2	0.844726	0.145519	no
989	APOL3	1.80796	0.143737	no
990	APOL4	-0.822705	0.838495	no
991	APOL5	0.768269	NA	no
992	APOL6	0.403632	0.518747	no
993	APOLD1	-0.151882	0.861566	no
994	APOM	-0.0449756	0.967336	no
995	APOO	-0.264103	0.517407	no
996	APOOL	0.212298	0.704938	no
997	APOOP5	NA	NA	no
998	APOPT1	-0.151827	0.554886	no
999	APP	-0.256363	0.526948	no
1000	APPBP2	0.422336	0.221645	no
1001	APPL1	0.0821671	0.895883	no
1002	APPL2	-0.760932	0.0377405	no
1003	APRT	-0.201376	0.706763	no
1004	APTR	0.113558	0.862994	no
1005	APTX	-0.0319888	0.943715	no
1006	AQP1	2.07592	0.0975474	no
1007	AQP10	1.3479	NA	no
1008	AQP11	0.315557	0.684905	no
1009	AQP12A	NA	NA	no
1010	AQP12B	NA	NA	no
1011	AQP2	-2.39086	NA	no
1012	AQP3	0.410319	0.739972	no
1013	AQP4	NA	NA	no
1014	AQP4-AS1	NA	NA	no
1015	AQP5	1.88526	NA	no
1016	AQP6	-2.13045	NA	no
1017	AQP7	0.369571	NA	no
1018	AQP7P1	1.76407	NA	no
1019	AQP7P3	-1.42961	NA	no
1020	AQP8	-1.4602	NA	no
1021	AQP9	-3.84043	0.142018	no
1022	AQR	-0.257387	0.702726	no
1023	AR	1.50228	0.0922447	no
1024	ARAF	-0.083696	0.90001	no
1025	ARAP1	0.187809	0.76618	no
1026	ARAP2	2.42491	0.491649	no
1027	ARAP3	0.475937	0.571254	no
1028	ARC	0.0146296	0.994907	no
1029	ARCN1	-0.28668	0.360713	no
1030	AREG	0.369571	NA	no
1031	AREL1	-0.0362191	0.920755	no
1032	ARF1	-0.151519	0.709932	no
1033	ARF3	-0.120155	0.812952	no
1034	ARF4	-0.157774	0.832492	no
1035	ARF5	-0.118783	0.824126	no
1036	ARF6	0.248945	0.581794	no
1037	ARFGAP1	0.090398	0.890893	no
1038	ARFGAP2	-0.0481533	0.918452	no
1039	ARFGAP3	-0.0313803	0.954637	no
1040	ARFGEF1	-0.0217624	0.975534	no
1041	ARFGEF2	0.429986	0.420606	no
1042	ARFGEF3	0.566777	0.750494	no
1043	ARFIP1	0.234653	0.639017	no
1044	ARFIP2	0.0140324	0.984346	no
1045	ARFRP1	0.188629	0.729482	no
1046	ARG1	0.589869	NA	no
1047	ARG2	-0.328732	0.497601	no
1048	ARGFX	-0.935709	NA	no
1049	ARGFXP2	0.565164	0.859564	no
1050	ARGLU1	-0.194939	0.439391	no
1051	ARHGAP1	0.0684694	0.932357	no
1052	ARHGAP10	0.442513	0.0468865	no
1053	ARHGAP11A	-1.16162	0.129324	no
1054	ARHGAP11B	-0.547652	0.678341	no
1055	ARHGAP12	0.43126	0.543533	no
1056	ARHGAP15	-0.523516	NA	no
1057	ARHGAP17	-0.0110331	0.987995	no
1058	ARHGAP18	0.863939	0.026933	no
1059	ARHGAP19	-1.08084	0.0741381	no
1060	ARHGAP19-SLIT1	NA	NA	no
1061	ARHGAP20	1.33194	0.185337	no
1062	ARHGAP21	0.499129	0.602165	no
1063	ARHGAP22	0.333717	0.634972	no
1064	ARHGAP23	-0.0861098	0.944351	no
1065	ARHGAP24	0.167111	0.844106	no
1066	ARHGAP25	0.914653	0.752282	no
1067	ARHGAP26	0.62549	0.421528	no
1068	ARHGAP26-AS1	NA	NA	no
1069	ARHGAP26-IT1	NA	NA	no
1070	ARHGAP27	-0.199687	0.830604	no
1071	ARHGAP28	0.180943	0.923356	no
1072	ARHGAP29	0.0548476	0.950275	no
1073	ARHGAP30	0.420826	0.718681	no
1074	ARHGAP31	0.138004	0.833611	no
1075	ARHGAP31-AS1	-0.55272	0.791588	no
1076	ARHGAP32	-0.286135	0.723622	no
22735	STMN1	-1.84661	9.94351e-06	dn
1078	ARHGAP35	0.212207	0.601001	no
1079	ARHGAP36	-0.935709	NA	no
1080	ARHGAP39	0.275379	0.699387	no
1081	ARHGAP4	-0.542379	0.484235	no
1082	ARHGAP40	1.83395	NA	no
1083	ARHGAP42	0.385199	0.625176	no
1084	ARHGAP44	0.252724	0.848148	no
1085	ARHGAP5	0.844718	0.22764	no
1086	ARHGAP5-AS1	0.41519	0.424101	no
1087	ARHGAP6	0.769074	0.584818	no
1088	ARHGAP8	0.369571	NA	no
1089	ARHGAP9	2.85288	0.0896191	no
1090	ARHGDIA	-0.426844	0.598668	no
1091	ARHGDIB	0.488729	0.766681	no
1092	ARHGDIG	2.52004	0.103692	no
1093	ARHGEF1	-0.147437	0.836739	no
1094	ARHGEF10	0.100366	0.801394	no
1095	ARHGEF10L	0.78638	0.0426332	no
1096	ARHGEF11	0.214628	0.531066	no
1097	ARHGEF12	0.363788	0.448648	no
1098	ARHGEF15	1.64246	NA	no
1099	ARHGEF16	0.0781578	0.968455	no
1100	ARHGEF17	-0.232405	0.599633	no
1101	ARHGEF18	0.419351	0.474453	no
1102	ARHGEF19	-0.700665	0.204069	no
1103	ARHGEF2	0.412075	0.501239	no
1104	ARHGEF25	0.155489	0.799505	no
1105	ARHGEF26	-1.2557	0.198811	no
1106	ARHGEF26-AS1	NA	NA	no
8197	HIST1H3D	7.12233	1.2485e-06	up
22583	SSR2	-0.884654	1.41819e-05	dn
1109	ARHGEF3-AS1	NA	NA	no
1110	ARHGEF33	-0.0905688	0.960623	no
1111	ARHGEF34P	-0.747417	0.586949	no
1112	ARHGEF35	-0.754411	0.64804	no
1113	ARHGEF37	1.44873	0.0512908	no
1114	ARHGEF38	-0.671788	NA	no
1115	ARHGEF38-IT1	NA	NA	no
1116	ARHGEF39	0.09922	0.920049	no
1117	ARHGEF4	-0.0126075	0.992358	no
1118	ARHGEF40	-0.0981015	0.900073	no
1119	ARHGEF5	-0.294358	0.689262	no
1120	ARHGEF6	-0.305708	0.710729	no
1121	ARHGEF7	0.311681	0.513466	no
1122	ARHGEF7-AS1	NA	NA	no
1123	ARHGEF7-AS2	2.35773	NA	no
8188	HIST1H2BJ	6.1392	1.35553e-06	up
1125	ARHGEF9-IT1	NA	NA	no
1126	ARID1A	0.0583306	0.916707	no
1127	ARID1B	0.0726085	0.902774	no
1128	ARID2	0.0650792	0.941849	no
1129	ARID3A	-0.144	0.884642	no
1130	ARID3B	0.305981	0.507411	no
1131	ARID3C	0.505646	0.76109	no
1132	ARID4A	-0.253324	0.418262	no
1133	ARID4B	0.132918	0.69717	no
1134	ARID5A	0.0473349	0.967336	no
1135	ARID5B	0.719571	0.200809	no
16520	NOCT	1.31318	1.56537e-06	up
1137	ARIH2	-0.161239	0.409066	no
1138	ARIH2OS	0.63894	0.471072	no
1139	ARL1	0.0633202	0.915459	no
1140	ARL10	-0.118816	0.893794	no
1141	ARL11	-0.523516	NA	no
1142	ARL13A	0.580607	NA	no
1143	ARL13B	-0.196472	0.722268	no
1144	ARL14	-0.0426221	NA	no
1145	ARL14EP	0.283259	0.484713	no
1146	ARL14EPL	NA	NA	no
1147	ARL15	0.300407	0.752282	no
1148	ARL16	0.0509425	0.922744	no
7122	GATA6	3.46629	2.82747e-06	up
1150	ARL17B	NA	NA	no
1151	ARL2	-0.0300614	0.968213	no
1152	ARL2-SNX15	-0.913551	NA	no
1153	ARL2BP	0.0502163	0.923448	no
1154	ARL3	-0.560042	0.124031	no
1155	ARL4A	-0.00177945	0.999241	no
20270	RPS23	0.762041	2.82747e-06	up
1157	ARL4D	0.61742	0.271753	no
1158	ARL5A	0.923732	0.0362853	no
1159	ARL5B	0.611377	0.33233	no
1160	ARL5C	-0.0426221	NA	no
1161	ARL6	0.172045	0.889799	no
1162	ARL6IP1	-1.04169	0.0374355	no
1163	ARL6IP4	0.109793	0.863159	no
1164	ARL6IP5	0.384831	0.439948	no
1165	ARL6IP6	-0.244362	0.640784	no
1166	ARL8A	0.444861	0.396333	no
1167	ARL8B	0.256563	0.636897	no
1168	ARL9	-1.44381	0.303231	no
1169	ARMC1	0.0235226	0.974821	no
8164	HIST1H1E	9.91286	2.83879e-06	up
1171	ARMC12	0.634527	0.718994	no
1172	ARMC2	0.0572105	0.94341	no
1173	ARMC2-AS1	1.20666	NA	no
1174	ARMC3	NA	NA	no
1175	ARMC4	-1.04811	0.525499	no
1176	ARMC5	0.532626	0.466597	no
1177	ARMC6	-0.0826543	0.896643	no
1178	ARMC7	-0.4122	0.356383	no
1179	ARMC8	0.0300502	0.967336	no
1180	ARMC9	0.818023	0.430077	no
1181	ARMCX1	0.120849	0.741364	no
1182	ARMCX2	0.110645	0.850609	no
1183	ARMCX3	0.612642	0.219512	no
1184	ARMCX4	-0.235804	0.729812	no
1185	ARMCX5	0.271201	0.638704	no
1186	ARMCX5-GPRASP2	-1.0712	0.305632	no
1187	ARMCX6	0.270016	0.179932	no
1188	ARMS2	-0.362367	NA	no
1189	ARMT1	-0.0353521	0.970087	no
1190	ARNT	0.140234	0.432085	no
1191	ARNT2	-0.0843595	0.939848	no
1192	ARNTL	-0.597085	0.0579021	no
1193	ARNTL2	-0.0909806	0.918452	no
1194	ARNTL2-AS1	NA	NA	no
1195	ARPC1A	-0.138777	0.601001	no
1196	ARPC1B	0.0668533	0.939773	no
1197	ARPC2	-0.354811	0.157217	no
1198	ARPC3	-0.213502	0.747684	no
1199	ARPC4	0.152814	0.677483	no
1200	ARPC4-TTLL3	-0.0426221	NA	no
1201	ARPC5	0.469091	0.161612	no
1202	ARPC5L	-0.400017	0.40692	no
1203	ARPIN	-0.324586	0.547639	no
1204	ARPP19	0.288817	0.648866	no
1205	ARPP21	1.07594	NA	no
1206	ARR3	0.434473	NA	no
1207	ARRB1	0.841476	0.540435	no
1208	ARRB2	-0.759385	0.172664	no
1209	ARRDC1	0.231803	0.741064	no
1210	ARRDC1-AS1	-0.324017	0.467472	no
1211	ARRDC2	-0.155753	0.787856	no
1212	ARRDC3	0.575081	0.383372	no
21755	SNHG16	1.73489	2.83879e-06	up
1214	ARRDC4	0.482711	0.76618	no
1215	ARRDC5	0.850566	NA	no
1216	ARSA	0.151359	0.757655	no
22770	STX11	2.34168	2.83879e-06	up
1218	ARSD	-0.000358811	0.999635	no
1219	ARSE	0.202979	0.92829	no
1220	ARSF	-2.03102	NA	no
1221	ARSG	0.222344	0.864797	no
1222	ARSH	NA	NA	no
1223	ARSI	-1.42159	0.0313325	no
1224	ARSJ	0.720027	0.28303	no
1225	ARSK	0.403647	0.51111	no
1226	ART1	-0.523516	NA	no
1227	ART3	0.634003	NA	no
1228	ART4	NA	NA	no
1229	ART5	1.27042	NA	no
1230	ARTN	-1.80879	0.0178347	no
1231	ARV1	0.0341682	0.964516	no
17595	PAPPA2	4.18492	2.84188e-06	up
1233	ARX	-2.27379	0.663184	no
1234	AS3MT	2.7023	0.0205567	no
1235	ASAH1	0.340516	0.646734	no
1236	ASAH2	0.766863	0.732808	no
1237	ASAH2B	1.63121	0.129482	no
1238	ASAP1	-0.119779	0.741492	no
1239	ASAP1-IT1	5.09989	0.0187365	no
1240	ASAP1-IT2	1.87091	0.0686469	no
1241	ASAP2	0.816815	0.013367	no
1242	ASAP3	0.863917	0.152323	no
1243	ASB1	0.579666	0.0389811	no
1244	ASB10	-0.0426221	NA	no
1245	ASB11	NA	NA	no
1246	ASB12	-1.4602	NA	no
1247	ASB13	-0.321988	0.554562	no
1248	ASB14	-0.10901	0.939849	no
1249	ASB15	-0.935709	NA	no
1250	ASB16	-0.00434084	0.996175	no
1251	ASB16-AS1	0.158366	0.733448	no
1252	ASB17	1.05541	NA	no
1253	ASB18	-1.85595	0.622938	no
1254	ASB2	2.65499	0.191952	no
1406	ATP5E	1.22143	3.0047e-06	up
1256	ASB4	0.696632	NA	no
1257	ASB5	-0.581832	0.847371	no
1258	ASB6	-0.00309459	0.994598	no
1259	ASB7	0.149674	0.704938	no
1260	ASB8	-0.0927646	0.800134	no
1261	ASB9	-0.791864	0.524889	no
1262	ASB9P1	1.29634	NA	no
1263	ASCC1	-0.164122	0.569076	no
1264	ASCC2	-0.326744	0.491242	no
1265	ASCC3	0.319898	0.567749	no
1266	ASCL1	-0.981844	NA	no
1267	ASCL2	-0.0823227	NA	no
1268	ASCL3	-0.0426221	NA	no
1269	ASCL4	-1.048	NA	no
1270	ASCL5	-1.86851	0.357335	no
1271	ASF1A	-0.286225	0.604518	no
1272	ASF1B	-1.41542	0.0336281	no
1273	ASGR1	0.689605	0.560795	no
1274	ASGR2	NA	NA	no
1275	ASH1L	0.305309	0.574312	no
1276	ASH1L-AS1	1.40406	0.0829279	no
1277	ASH2L	-0.906646	0.0270163	no
1278	ASIC1	-0.810059	0.291152	no
1279	ASIC2	1.15726	0.686367	no
1280	ASIC3	-0.0482095	0.979221	no
1281	ASIC4	1.08703	0.533675	no
1282	ASIC5	-0.935709	NA	no
1283	ASIP	-2.72151	0.105269	no
1284	ASL	0.0441085	0.951089	no
1285	ASMT	NA	NA	no
1286	ASMTL	NA	NA	no
1287	ASMTL-AS1	NA	NA	no
1288	ASNA1	-0.246734	0.575428	no
1289	ASNS	0.482026	0.53886	no
1290	ASNSD1	-0.0134596	0.985001	no
1291	ASPA	0.75811	0.752452	no
1292	ASPDH	0.150978	NA	no
1293	ASPG	-0.111324	NA	no
1294	ASPH	0.102679	0.867177	no
1295	ASPHD1	-0.759755	0.384742	no
1296	ASPHD2	0.666795	0.349039	no
1297	ASPM	-1.40501	0.136431	no
4417	CXCL8	5.48662	3.08874e-06	up
1299	ASPRV1	-0.375762	0.750959	no
1300	ASPSCR1	0.280412	0.637218	no
1301	ASRGL1	0.0182589	0.992606	no
1302	ASS1	0.14576	0.913687	no
1303	ASTE1	-0.351728	0.40189	no
1304	ASTL	-0.971026	0.741613	no
1305	ASTN1	-1.8395	0.171536	no
1306	ASTN2	0.846673	0.0118703	no
1307	ASTN2-AS1	-0.0426221	NA	no
1308	ASUN	-0.0435406	0.948069	no
1309	ASXL1	-0.270433	0.331892	no
1310	ASXL2	0.15918	0.795011	no
1311	ASXL3	-0.111324	NA	no
1312	ASZ1	NA	NA	no
1313	ATAD1	0.242176	0.724526	no
1314	ATAD2	-1.05607	0.210037	no
1315	ATAD2B	0.284417	0.675479	no
1316	ATAD3A	0.142786	0.860937	no
1317	ATAD3B	-0.0670982	0.946786	no
1318	ATAD3C	-0.833377	NA	no
1319	ATAD5	-0.507302	0.6257	no
1320	ATAT1	-0.680511	0.115468	no
1321	ATCAY	0.123045	0.983527	no
1322	ATE1	0.247923	0.533898	no
1323	ATE1-AS1	-0.051955	0.971422	no
1324	ATF1	-0.302242	0.370173	no
1325	ATF2	0.0545379	0.936187	no
1326	ATF3	2.0594	0.0251477	no
1327	ATF4	0.159212	0.699622	no
1328	ATF5	1.51104	0.214099	no
1329	ATF6	-0.172324	0.676357	no
1330	ATF6B	-0.945333	0.0126257	no
1331	ATF7	-0.336337	0.284046	no
1332	ATF7IP	0.24935	0.705421	no
1333	ATF7IP2	2.1616	0.172797	no
1334	ATG10	-0.341539	0.429795	no
1335	ATG101	0.113467	0.792384	no
1336	ATG12	0.13915	0.793973	no
1337	ATG13	-0.156679	0.632699	no
1338	ATG14	0.292922	0.378087	no
1339	ATG16L1	0.0247321	0.959347	no
1340	ATG16L2	0.395526	0.362387	no
1341	ATG2A	0.243746	0.76673	no
1342	ATG2B	0.203921	0.708508	no
1343	ATG3	-0.0823781	0.693349	no
1344	ATG4A	-0.242129	0.75357	no
1345	ATG4B	0.104969	0.831173	no
1346	ATG4C	0.212737	0.821626	no
1347	ATG4D	0.356416	0.264216	no
1348	ATG5	-0.240619	0.642115	no
1349	ATG7	0.277532	0.510608	no
1350	ATG9A	-0.0282334	0.959995	no
1351	ATG9B	-1.29031	0.338745	no
1352	ATHL1	-0.0628857	0.948069	no
1353	ATIC	-0.746657	0.40094	no
1354	ATL1	0.85906	0.266156	no
1355	ATL2	-0.323026	0.669984	no
1356	ATL3	0.961848	0.0379768	no
1357	ATM	0.65063	0.181944	no
1358	ATMIN	0.215115	0.474573	no
1359	ATN1	-0.704492	0.584981	no
1360	ATOH1	-0.935709	NA	no
1361	ATOH7	2.18079	NA	no
1362	ATOH8	0.032888	0.980117	no
1363	ATOX1	-0.176852	0.685963	no
1364	ATP10A	0.144952	0.851826	no
1365	ATP10B	-3.45227	NA	no
1366	ATP10D	0.527839	0.238149	no
1367	ATP11A	-0.216186	0.684905	no
1368	ATP11A-AS1	2.46612	NA	no
1369	ATP11AUN	-1.4602	NA	no
1370	ATP11B	0.323076	0.599341	no
1371	ATP11C	0.0438561	0.952167	no
1372	ATP12A	0.548382	NA	no
1373	ATP13A1	0.156232	0.880513	no
1374	ATP13A2	0.225637	0.752282	no
1375	ATP13A3	0.779436	0.223607	no
1376	ATP13A4	0.401411	NA	no
1377	ATP13A4-AS1	NA	NA	no
1378	ATP13A5	NA	NA	no
1379	ATP13A5-AS1	NA	NA	no
1380	ATP1A1	-0.358645	0.369923	no
1381	ATP1A1-AS1	0.131013	0.889911	no
1382	ATP1A2	-0.429714	0.881943	no
1383	ATP1A3	-1.04572	0.334531	no
1384	ATP1A4	-0.935709	NA	no
1385	ATP1B1	-0.282842	0.551952	no
1386	ATP1B2	-0.301249	NA	no
1387	ATP1B3	-0.567961	0.138573	no
1388	ATP1B4	0.369571	NA	no
1389	ATP2A1	-0.0419871	0.968333	no
1390	ATP2A1-AS1	-0.416128	0.747559	no
1391	ATP2A2	0.15131	0.775321	no
19661	RBP1	-3.50862	1.47417e-05	dn
1393	ATP2B1	-0.0664297	0.891978	no
1394	ATP2B2	-1.00492	0.747377	no
1395	ATP2B2-IT2	NA	NA	no
1396	ATP2B3	0.932335	0.744127	no
1397	ATP2B4	0.369922	0.464431	no
1398	ATP2C1	-0.233151	0.653238	no
1399	ATP2C2	-0.597493	0.597299	no
1400	ATP4A	0.125132	0.973306	no
1401	ATP4B	-0.523516	NA	no
1402	ATP5A1	-0.0185005	0.961346	no
1403	ATP5B	-0.120219	0.658754	no
1404	ATP5C1	-0.237975	0.470284	no
1405	ATP5D	0.173585	0.906208	no
5466	EFEMP1	3.78375	3.08874e-06	up
1407	ATP5EP2	-0.521723	0.701364	no
1408	ATP5F1	0.0831488	0.838401	no
1409	ATP5G1	0.198613	0.697253	no
1410	ATP5G2	-0.269135	0.689699	no
1411	ATP5G3	-0.172486	0.607931	no
1412	ATP5H	-0.0168423	0.970087	no
1413	ATP5I	0.324676	0.553956	no
1414	ATP5J	-0.504298	0.312767	no
1415	ATP5J2	0.113004	0.791353	no
1416	ATP5J2-PTCD1	-1.72384	NA	no
1417	ATP5L	0.0434607	0.913942	no
1418	ATP5L2	2.37536	0.340738	no
1419	ATP5O	-0.468164	0.229966	no
1420	ATP5S	0.0885619	0.898867	no
1421	ATP5SL	-0.510105	0.145929	no
1422	ATP6AP1	-0.275362	0.556794	no
1423	ATP6AP1L	-0.151138	0.844919	no
1424	ATP6AP2	0.158552	0.820851	no
1425	ATP6V0A1	0.499748	0.394824	no
1426	ATP6V0A2	0.168172	0.601578	no
1427	ATP6V0A4	-0.61384	0.730973	no
1428	ATP6V0B	0.231715	0.686832	no
1429	ATP6V0C	-0.0708202	0.967916	no
1430	ATP6V0CP3	-2.255	0.304654	no
1431	ATP6V0D1	0.184205	0.705635	no
1432	ATP6V0D2	-1.4602	NA	no
1433	ATP6V0E1	0.0113423	0.984019	no
1434	ATP6V0E2	0.310098	0.798065	no
1435	ATP6V0E2-AS1	-0.609627	0.372383	no
1436	ATP6V1A	0.723045	0.0408455	no
1437	ATP6V1B1	-0.479603	0.638378	no
1438	ATP6V1B1-AS1	-1.26977	0.276692	no
1439	ATP6V1B2	-0.311564	0.439083	no
1440	ATP6V1C1	0.0268828	0.971278	no
1441	ATP6V1C2	-0.422984	0.17966	no
1442	ATP6V1D	-0.113671	0.860937	no
1443	ATP6V1E1	0.308753	0.601695	no
1444	ATP6V1E2	0.589556	0.431266	no
1445	ATP6V1F	0.175118	0.768483	no
1446	ATP6V1G1	0.182545	0.723622	no
1447	ATP6V1G2	0.692227	0.459313	no
1448	ATP6V1G2-DDX39B	1.36115	NA	no
1449	ATP6V1G3	-1.34726	0.33738	no
1450	ATP6V1H	0.157826	0.704938	no
1451	ATP7A	0.544211	0.276445	no
1452	ATP7B	0.221989	0.678341	no
1453	ATP8A1	-0.652393	0.654125	no
1454	ATP8A2	-1.60774	0.488584	no
8222	HIST2H2BE	3.52041	3.08874e-06	up
1456	ATP8B2	0.343177	0.488584	no
1457	ATP8B3	-1.01853	0.0978847	no
1458	ATP8B4	-0.0248568	0.987995	no
1459	ATP8B5P	0.454076	NA	no
1460	ATP9A	0.734903	0.0642218	no
1461	ATP9B	0.396836	0.309777	no
1462	ATPAF1	0.0957918	0.815187	no
1463	ATPAF2	-0.0381937	0.967336	no
1464	ATPIF1	0.388271	0.420718	no
1465	ATR	0.130276	0.848828	no
1466	ATRAID	-0.54666	0.0726867	no
1467	ATRIP	-0.163619	0.747377	no
1468	ATRN	0.141425	0.634972	no
1469	ATRNL1	-0.798554	0.651055	no
1470	ATRX	0.376398	0.278232	no
1471	ATXN1	0.98238	0.0347928	no
1472	ATXN10	-0.319885	0.487705	no
1473	ATXN1L	0.0472701	0.903068	no
1474	ATXN2	-0.0441477	0.946701	no
1475	ATXN2L	-0.36873	0.642104	no
1476	ATXN3	0.591346	0.149765	no
1477	ATXN3L	-0.0426221	NA	no
1478	ATXN7	1.44276	0.0384141	no
1479	ATXN7L1	0.291899	0.470038	no
1480	ATXN7L2	-0.582668	0.284332	no
1481	ATXN7L3	-0.168742	0.472067	no
1482	ATXN7L3B	0.100854	0.712978	no
1483	ATXN8OS	-0.0426221	NA	no
1484	AUH	0.441977	0.241062	no
1485	AUNIP	-0.947647	0.199918	no
1486	AUP1	-0.184974	0.686541	no
1487	AURKA	-1.37467	0.0277419	no
1488	AURKAIP1	0.0193668	0.983412	no
1489	AURKAPS1	1.28277	0.163248	no
1490	AURKB	-1.48331	0.020726	no
1491	AURKC	-0.103695	0.949278	no
1492	AUTS2	-0.766008	0.606556	no
1493	AVEN	0.339576	0.453035	no
1494	AVIL	-0.430546	0.517517	no
1495	AVL9	0.0430394	0.939678	no
1496	AVP	-3.04008	NA	no
1497	AVPI1	0.523855	0.456143	no
1498	AVPR1A	-3.26635	NA	no
1499	AVPR1B	-0.523516	NA	no
1500	AVPR2	-0.226696	NA	no
1501	AWAT1	NA	NA	no
1502	AWAT2	-0.57037	NA	no
1503	AXDND1	1.63319	NA	no
1504	AXIN1	0.109249	0.873157	no
1505	AXIN2	-0.0369001	0.970853	no
1506	AXL	0.313499	0.573426	no
1507	AZGP1	-0.0426221	NA	no
1508	AZGP1P1	NA	NA	no
1509	AZI2	0.0337268	0.952048	no
1510	AZIN1	0.0499724	0.951716	no
1511	AZIN1-AS1	1.90488	0.0581392	no
1512	AZIN2	0.749119	0.209458	no
1513	AZU1	0.816502	NA	no
1514	B2M	-0.100867	0.820307	no
1515	B3GALNT1	-0.321592	0.665826	no
1516	B3GALNT2	0.559318	0.131337	no
1517	B3GALT1	0.36593	NA	no
1518	B3GALT2	1.77521	0.056996	no
1519	B3GALT4	-0.711832	0.216266	no
1520	B3GALT5	-1.60627	0.141927	no
1521	B3GALT5-AS1	-1.22585	0.496598	no
1522	B3GALT6	0.52657	0.410744	no
1523	B3GAT1	-2.54139	NA	no
1524	B3GAT2	-1.09201	NA	no
1525	B3GAT3	0.188253	0.721382	no
1526	B3GLCT	-0.211289	0.788446	no
1527	B3GNT2	0.849232	0.1283	no
1528	B3GNT3	-0.157354	NA	no
1529	B3GNT4	-1.58107	0.502008	no
1530	B3GNT5	-0.873631	0.610613	no
1531	B3GNT6	-4.09414	0.295508	no
1532	B3GNT7	1.74724	0.24579	no
1533	B3GNT8	-0.0828708	0.95655	no
1534	B3GNT9	0.561246	0.222527	no
1535	B3GNTL1	-0.0437224	0.96272	no
1536	B4GALNT1	0.205578	0.86464	no
1537	B4GALNT2	1.92885	NA	no
1538	B4GALNT3	-0.759274	0.769595	no
1539	B4GALNT4	0.580462	0.604432	no
1540	B4GALT1	-0.0522895	0.951737	no
1541	B4GALT1-AS1	0.410256	0.537623	no
1542	B4GALT2	-0.0449125	0.950676	no
1543	B4GALT3	0.0280036	0.948362	no
1544	B4GALT4	-0.126385	0.810659	no
1545	B4GALT4-AS1	-0.0258599	NA	no
1546	B4GALT5	-0.0580208	0.922934	no
1547	B4GALT6	-0.0643049	0.967916	no
1548	B4GALT7	0.0445405	0.953645	no
1549	B4GAT1	0.243271	0.607931	no
1550	B9D1	-0.0529782	0.967336	no
1551	B9D2	0.0954038	0.894979	no
1552	BAALC	0.23165	0.908076	no
1553	BAALC-AS1	0.665297	0.786439	no
1554	BAALC-AS2	0.369571	NA	no
1555	BAAT	-1.30791	NA	no
1556	BABAM1	-0.174266	0.663262	no
1557	BACE1	-0.240977	0.560213	no
1558	BACE1-AS	-0.406756	0.624346	no
1559	BACE2	-1.32871	0.0239615	no
20222	RPL41	1.55724	3.08874e-06	up
1561	BACH1-IT2	1.93848	NA	no
1562	BACH2	1.13811	0.582995	no
1563	BAD	0.2866	0.546179	no
1564	BAG1	-0.00396913	0.995299	no
1565	BAG2	0.163861	0.631449	no
1566	BAG3	0.095807	0.879671	no
8182	HIST1H2BD	4.38958	3.1449e-06	up
1568	BAG5	0.223567	0.582872	no
1569	BAG6	0.00229192	0.997636	no
1570	BAGE	NA	NA	no
1571	BAGE2	NA	NA	no
1572	BAGE3	NA	NA	no
1573	BAGE4	NA	NA	no
1574	BAGE5	NA	NA	no
1575	BAHCC1	0.312629	0.721523	no
1576	BAHD1	0.0915167	0.837687	no
1577	BAIAP2	-1.29885	0.0441334	no
1578	BAIAP2-AS1	0.0498263	0.945654	no
1579	BAIAP2L1	0.0705336	0.940265	no
1580	BAIAP2L2	-0.134701	0.946701	no
1581	BAIAP3	-0.516022	0.69717	no
1582	BAK1	0.418362	0.179044	no
1583	BAMBI	1.27608	0.116149	no
1584	BANCR	NA	NA	no
1585	BANF1	-0.476958	0.353562	no
1586	BANF2	NA	NA	no
1587	BANK1	0.684086	0.776616	no
1588	BANP	0.219098	0.6388	no
1589	BAP1	-0.247168	0.284374	no
1590	BARD1	-0.274249	0.827133	no
1591	BARHL1	-0.591927	NA	no
1592	BARHL2	3.2389	0.0703445	no
1593	BARX1	-1.38431	0.687844	no
1594	BARX2	-0.935709	NA	no
1595	BASP1	0.473179	0.523973	no
1596	BASP1P1	NA	NA	no
1597	BATF	-0.935709	NA	no
1598	BATF2	-1.81989	0.139343	no
1599	BATF3	1.459	0.256036	no
1600	BAX	-0.545894	0.359723	no
1601	BAZ1A	-0.176094	0.629988	no
1602	BAZ1B	-0.302719	0.415868	no
1603	BAZ2A	-0.223707	0.467503	no
1604	BAZ2B	0.256281	0.65943	no
1605	BBC3	-0.293472	0.849049	no
1606	BBIP1	0.145917	0.842579	no
1607	BBOX1	-0.97095	NA	no
1608	BBOX1-AS1	-0.951314	0.658805	no
1609	BBS1	0.379954	0.39435	no
1610	BBS10	0.084075	0.933565	no
1611	BBS12	-0.170914	0.718249	no
1612	BBS2	-0.021692	0.972787	no
1613	BBS4	0.0257055	0.967383	no
1614	BBS5	0.239589	0.473161	no
1615	BBS7	0.247966	0.683589	no
1616	BBS9	0.00363019	0.994157	no
1617	BBX	0.547735	0.181401	no
1618	BCAM	1.60161	0.0481855	no
1619	BCAN	-0.770864	NA	no
1620	BCAP29	0.144271	0.830604	no
1621	BCAP31	-0.0705582	0.882284	no
1622	BCAR1	0.352605	0.553868	no
1623	BCAR3	-0.392953	0.548865	no
1624	BCAR4	NA	NA	no
1625	BCAS1	1.16812	0.617563	no
1626	BCAS2	0.00337788	0.994157	no
1627	BCAS3	0.410867	0.326617	no
1628	BCAS4	0.0959887	0.841847	no
1629	BCAT1	0.702013	0.127323	no
1630	BCAT2	0.502474	0.257619	no
1631	BCCIP	-0.384895	0.117754	no
1632	BCDIN3D	0.129891	0.785609	no
1633	BCDIN3D-AS1	0.000342285	0.999669	no
1634	BCHE	-3.78303	NA	no
1635	BCKDHA	-0.110922	0.874262	no
1636	BCKDHB	-0.164183	0.718681	no
1637	BCKDK	-0.171701	0.759227	no
1638	BCL10	0.847305	0.15797	no
1639	BCL11A	0.625092	0.608169	no
1640	BCL11B	0.421845	0.857933	no
1641	BCL2	-0.0635248	0.959775	no
1642	BCL2A1	0.725187	NA	no
1643	BCL2L1	0.157494	0.868089	no
1644	BCL2L10	-1.13903	0.642824	no
1645	BCL2L11	-0.184524	0.841468	no
1646	BCL2L12	-0.547879	0.267094	no
1647	BCL2L13	0.17186	0.459313	no
1648	BCL2L14	2.2585	NA	no
1649	BCL2L15	1.5906	0.447653	no
1650	BCL2L2	0.14209	0.797998	no
1651	BCL2L2-PABPN1	0.9155	NA	no
1652	BCL3	-0.124576	0.953219	no
1653	BCL6	0.141363	0.803111	no
1654	BCL6B	-0.848332	0.491926	no
1655	BCL7A	0.596669	0.396333	no
1656	BCL7B	-0.221163	0.595883	no
1657	BCL7C	-0.252603	0.719708	no
1658	BCL9	-0.624608	0.137285	no
1659	BCL9L	-0.543716	0.459313	no
1660	BCLAF1	-0.0167284	0.983412	no
1661	BCO1	NA	NA	no
1662	BCO2	-0.218585	0.88742	no
1663	BCOR	-0.042454	0.946701	no
1664	BCORL1	-0.164637	0.796865	no
1665	BCORP1	-0.111324	NA	no
1666	BCR	0.905987	0.0585128	no
1667	BCRP2	NA	NA	no
1668	BCRP3	2.79034	0.559693	no
1669	BCS1L	-0.166694	0.642824	no
1670	BCYRN1	2.29019	NA	no
1671	BDH1	-0.609951	0.390352	no
1672	BDH2	-0.0826632	0.924375	no
1673	BDKRB1	-2.0019	0.0567482	no
1674	BDKRB2	0.29557	0.850975	no
1675	BDNF	0.997107	0.0167574	no
15032	MIR663AHG	6.97747	3.1449e-06	up
1677	BDP1	0.520606	0.517407	no
1678	BEAN1	0.0888117	0.962193	no
1679	BEAN1-AS1	-0.513689	NA	no
1680	BECN1	-0.0631844	0.805665	no
1681	BECN2	-0.523516	NA	no
1682	BEGAIN	-2.33696	0.029832	no
1683	BEND2	NA	NA	no
1684	BEND3	0.0983085	0.918703	no
8163	HIST1H1D	9.27335	3.34574e-06	up
1686	BEND4	-1.40166	0.641741	no
1687	BEND5	-0.597303	0.82963	no
1688	BEND6	-0.120104	0.897666	no
1689	BEND7	-0.568407	0.233959	no
1690	BEST1	-0.554044	0.484522	no
1691	BEST2	-0.999313	NA	no
1692	BEST3	1.81481	NA	no
1693	BEST4	0.804017	0.550158	no
1694	BET1	0.0901207	0.906833	no
1695	BET1L	-0.32767	0.509151	no
1696	BEX1	-0.811857	0.583932	no
1697	BEX2	0.710898	0.867162	no
1698	BEX4	-0.989813	0.244823	no
1699	BEX5	-1.99768	0.381975	no
1700	BFAR	-0.426773	0.0497002	no
1701	BFSP1	1.31758	0.320086	no
1702	BFSP2	-0.935709	NA	no
1703	BGLAP	-0.714048	NA	no
1704	BGLT3	NA	NA	no
1705	BGN	-0.0433859	0.973641	no
1706	BHLHA15	0.88078	0.663352	no
1707	BHLHA9	1.91323	NA	no
1708	BHLHB9	-0.454052	0.500745	no
1709	BHLHE22	-1.92016	NA	no
1710	BHLHE23	-0.418851	NA	no
1711	BHLHE40	0.0686889	0.941325	no
1712	BHLHE40-AS1	-0.34943	0.81011	no
1713	BHLHE41	-0.360572	0.655123	no
1714	BHMG1	-0.611056	NA	no
1715	BHMT	2.35569	0.388043	no
1716	BHMT2	0.0855652	0.953238	no
1717	BICC1	0.689011	0.247405	no
1718	BICD1	-0.627392	0.167174	no
1719	BICD2	0.471438	0.0307995	no
1720	BID	0.212127	0.682184	no
1721	BIK	-0.260751	NA	no
1722	BIN1	0.364928	0.489352	no
1723	BIN2	-1.20932	NA	no
1724	BIN3	-0.362913	0.1787	no
1725	BIN3-IT1	1.17109	0.517517	no
1726	BIRC2	-0.096979	0.927366	no
1727	BIRC3	3.53615	0.0100045	no
19138	PSRC1	-1.79767	2.21395e-05	dn
1729	BIRC6	0.769284	0.197674	no
1730	BIRC6-AS2	2.1551	NA	no
1731	BIRC7	-3.24089	NA	no
1732	BIRC8	-0.0426221	NA	no
1733	BISPR	1.45428	0.382311	no
1734	BIVM	0.138314	0.761398	no
1735	BIVM-ERCC5	1.2136	NA	no
1736	BLACAT1	-1.86333	NA	no
1737	BLACE	0.369571	NA	no
1738	BLCAP	-0.124873	0.689152	no
16557	NOTCH2NL	1.97991	3.41135e-06	up
1740	BLK	2.61145	0.118233	no
1741	BLM	-1.28538	0.159903	no
1742	BLMH	-0.127605	0.78299	no
1743	BLNK	NA	NA	no
1744	BLOC1S1	-0.0216181	0.980508	no
1745	BLOC1S1-RDH5	1.26702	NA	no
1746	BLOC1S2	0.0121083	0.983509	no
1747	BLOC1S3	-0.223896	0.785609	no
1748	BLOC1S4	0.275272	0.66522	no
1749	BLOC1S5	3.1127	0.143432	no
1750	BLOC1S5-TXNDC5	-0.0426221	NA	no
1751	BLOC1S6	0.358198	0.483028	no
1752	BLVRA	-0.274156	0.521138	no
1753	BLVRB	0.427665	0.46229	no
1754	BLZF1	-0.205498	0.722854	no
9333	KCNS1	-2.96027	2.49137e-05	dn
1756	BMI1	1.40993	0.0131523	no
1757	BMP1	0.44077	0.579172	no
1758	BMP10	-1.4602	NA	no
1759	BMP15	-0.935709	NA	no
1760	BMP2	0.610829	0.595685	no
1761	BMP2K	-0.0761112	0.910323	no
1762	BMP3	2.26752	0.152323	no
1763	BMP4	4.91778	0.0311852	no
1764	BMP5	NA	NA	no
1765	BMP6	2.14043	0.0183778	no
1766	BMP7	-2.46596	NA	no
1767	BMP7-AS1	NA	NA	no
1768	BMP8A	0.425698	0.583688	no
1769	BMP8B	2.25597	0.481114	no
1770	BMPER	0.616199	0.252301	no
1771	BMPR1A	1.25613	0.0940634	no
1772	BMPR1B	-0.412154	0.693702	no
1773	BMPR1B-AS1	-0.0426221	NA	no
1774	BMPR2	0.435442	0.517517	no
1775	BMS1	-0.159439	0.53771	no
1776	BMS1P17	NA	NA	no
1777	BMS1P18	NA	NA	no
1778	BMS1P20	0.535451	0.15797	no
1779	BMS1P21	0.797377	0.624346	no
1780	BMS1P4	-0.238698	0.724889	no
1781	BMS1P5	0.297027	0.882555	no
1782	BMS1P6	0.783861	NA	no
1783	BMX	-0.0426221	NA	no
1784	BNC1	-0.689789	0.580915	no
1785	BNC2	0.636899	0.582021	no
1786	BNIP1	-0.204348	0.643843	no
1787	BNIP2	0.233226	0.641665	no
1788	BNIP3	-0.189961	0.888329	no
1789	BNIP3L	0.191032	0.840137	no
1790	BNIPL	-1.04639	0.5969	no
1791	BOC	-1.25807	0.111103	no
1792	BOD1	-0.0404125	0.930881	no
1793	BOD1L1	0.196815	0.63146	no
1794	BOD1L2	0.353158	NA	no
1795	BOK	0.0881496	0.930784	no
1796	BOK-AS1	0.61724	0.756219	no
1797	BOLA1	-0.0342287	0.94977	no
1798	BOLA2	NA	NA	no
1799	BOLA2B	NA	NA	no
1800	BOLA3	-0.0825376	0.833211	no
1801	BOLA3-AS1	-0.0460696	0.94032	no
1802	BOLL	NA	NA	no
1803	BOP1	0.195803	0.891978	no
3598	CIB2	-1.56037	3.37251e-05	dn
1805	BPESC1	-1.44054	NA	no
1806	BPGM	0.781216	0.26139	no
1807	BPHL	-0.0786899	0.891978	no
1808	BPI	3.02032	NA	no
1809	BPIFA1	NA	NA	no
1810	BPIFA2	NA	NA	no
1811	BPIFA3	NA	NA	no
1812	BPIFA4P	-0.935709	NA	no
1813	BPIFB1	-0.935709	NA	no
1814	BPIFB2	NA	NA	no
1815	BPIFB3	-1.4602	NA	no
1816	BPIFB4	NA	NA	no
1817	BPIFB6	-1.44054	NA	no
1818	BPIFC	NA	NA	no
1819	BPNT1	0.459911	0.368128	no
1820	BPTF	0.10821	0.813911	no
1821	BPY2	NA	NA	no
1822	BPY2B	NA	NA	no
1823	BPY2C	NA	NA	no
1824	BRAF	0.66409	0.351485	no
1825	BRAP	0.123291	0.629663	no
1826	BRAT1	0.00754457	0.992606	no
1827	BRCA1	-1.04652	0.223548	no
1828	BRCA2	-0.127597	0.938792	no
1829	BRCAT107	NA	NA	no
1830	BRCAT54	0.349306	NA	no
1831	BRCC3	-0.266996	0.610881	no
1832	BRD1	0.147004	0.728824	no
1833	BRD2	-0.312762	0.365748	no
1834	BRD3	0.27552	0.707917	no
1835	BRD4	-0.330081	0.781127	no
1836	BRD7	0.20975	0.63389	no
1837	BRD7P3	3.98725	0.0942857	no
3327	CENPA	-1.98032	4.48375e-05	dn
1839	BRD9	-0.114527	0.7577	no
1840	BRDT	-0.935709	NA	no
1841	BRDTP1	NA	NA	no
1842	BRE	0.238337	0.714199	no
1843	BRE-AS1	0.252972	0.861035	no
1844	BREA2	0.771978	0.733297	no
1845	BRF1	0.332166	0.574003	no
1846	BRF2	0.00623032	0.98714	no
1847	BRI3	-0.218242	0.730973	no
1848	BRI3BP	-0.0749151	0.956906	no
1849	BRICD5	-0.352678	0.622938	no
1850	BRINP1	-0.673124	0.768386	no
1851	BRINP2	3.50885	0.112871	no
1852	BRINP3	-0.935709	NA	no
1853	BRIP1	-1.00944	0.28513	no
1854	BRIX1	-0.299307	0.347553	no
1855	BRK1	0.0831935	0.847833	no
1856	BRMS1	-0.28881	0.266717	no
1857	BRMS1L	-0.287166	0.706753	no
1858	BROX	0.514982	0.248188	no
1859	BRPF1	0.140381	0.826243	no
1860	BRPF3	-0.117625	0.861729	no
1861	BRS3	-0.935709	NA	no
1862	BRSK1	0.712311	0.0997903	no
1863	BRSK2	-0.484146	0.720476	no
1864	BRWD1	0.524391	0.415405	no
1865	BRWD1-AS1	-0.523516	NA	no
1866	BRWD1-IT2	0.385489	0.792384	no
1867	BRWD3	0.378135	0.378244	no
1868	BSCL2	0.710586	0.380687	no
1869	BSDC1	-0.0179231	0.962056	no
1870	BSG	0.357484	0.439461	no
1871	BSN	0.500745	0.607931	no
1872	BSN-AS2	0.148848	NA	no
1873	BSND	0.369571	NA	no
1874	BSPH1	NA	NA	no
1875	BSPRY	-0.0426221	NA	no
8219	HIST2H2AC	6.77765	3.92663e-06	up
1877	BST2	1.82166	0.144699	no
1878	BSX	NA	NA	no
1879	BTAF1	0.130396	0.883119	no
1880	BTBD1	0.329996	0.182284	no
1881	BTBD10	0.0397969	0.953238	no
1882	BTBD11	-0.640227	0.679949	no
1883	BTBD16	2.05209	NA	no
1884	BTBD17	0.369571	NA	no
1885	BTBD18	1.35603	0.398974	no
1886	BTBD19	0.383723	0.761541	no
1887	BTBD2	-0.0577862	0.960262	no
1888	BTBD3	-0.24896	0.669106	no
1889	BTBD6	-0.427434	0.086729	no
1890	BTBD7	0.102072	0.830821	no
1891	BTBD8	1.33208	0.308358	no
12446	LOC439994	3.25097	3.92663e-06	up
1893	BTC	1.68281	NA	no
1894	BTD	-0.230435	0.543758	no
1895	BTF3	-0.0708517	0.823603	no
1896	BTF3L4	0.350466	0.595883	no
1897	BTF3P11	-0.523516	NA	no
1898	BTG1	-0.0237123	0.973191	no
1899	BTG2	0.279004	0.813964	no
1900	BTG3	-0.957577	0.0460605	no
1901	BTG4	0.65568	NA	no
1902	BTK	NA	NA	no
1903	BTLA	-0.317746	NA	no
1904	BTN1A1	-2.02796	NA	no
1905	BTN2A1	-0.363332	0.500745	no
1906	BTN2A2	-0.252726	0.699622	no
1907	BTN2A3P	-0.568771	0.374215	no
1908	BTN3A1	0.404521	0.409814	no
1909	BTN3A2	-0.0431699	0.965998	no
1910	BTN3A3	0.729512	0.189478	no
1911	BTNL10	NA	NA	no
1912	BTNL2	-0.523516	NA	no
1913	BTNL3	NA	NA	no
1914	BTNL8	-0.0426221	NA	no
1915	BTNL9	-2.31943	NA	no
1916	BTRC	0.203803	0.642104	no
1917	BUB1	-1.63634	0.0209657	no
3245	CDKN2D	-1.13999	4.63836e-05	dn
1919	BUB3	-0.262104	0.510041	no
1920	BUD13	-0.63369	0.0161522	no
1921	BUD31	0.152736	0.718964	no
1922	BVES	-0.114286	0.926932	no
1923	BVES-AS1	-0.584557	0.568222	no
1924	BYSL	-0.366618	0.605861	no
1925	BZRAP1	0.319662	0.897569	no
1926	BZRAP1-AS1	0.925362	0.540148	no
1927	BZW1	0.665527	0.172797	no
1928	BZW2	-0.197891	0.612863	no
1929	C10orf10	0.0698612	0.967336	no
1930	C10orf105	-1.3207	NA	no
1931	C10orf107	0.017624	0.992606	no
1932	C10orf11	-0.0136747	0.994194	no
1933	C10orf111	1.77351	0.346281	no
1934	C10orf113	NA	NA	no
1935	C10orf12	0.83896	0.281977	no
1936	C10orf120	NA	NA	no
1937	C10orf126	-1.048	NA	no
1938	C10orf128	0.152485	NA	no
1939	C10orf131	-0.124582	NA	no
1940	C10orf142	1.06937	0.737715	no
1941	C10orf2	-0.00238216	0.998042	no
1942	C10orf25	-0.559795	0.408033	no
1943	C10orf32	0.39171	0.590144	no
1944	C10orf32-ASMT	NA	NA	no
1945	C10orf35	-0.422469	0.798274	no
1946	C10orf53	-0.935709	NA	no
1947	C10orf54	0.456126	0.707249	no
1948	C10orf55	1.19475	0.345439	no
1949	C10orf62	1.04586	NA	no
1950	C10orf67	-1.49871	0.494003	no
1951	C10orf71	-0.632977	NA	no
1952	C10orf71-AS1	-0.935709	NA	no
21750	SNHG1	-1.39384	6.11836e-05	dn
22978	TACC3	-2.02567	6.52127e-05	dn
1955	C10orf88	-0.138249	0.829192	no
1956	C10orf90	0.346297	0.808965	no
1957	C10orf91	-0.0426221	NA	no
1958	C10orf95	0.802282	0.728583	no
1959	C10orf99	NA	NA	no
1960	C11orf1	-0.349756	0.571222	no
1961	C11orf16	0.463858	NA	no
1962	C11orf21	NA	NA	no
1963	C11orf24	-0.0630223	0.918703	no
1964	C11orf30	-0.513531	0.11512	no
1965	C11orf31	0.09731	0.900915	no
1966	C11orf39	NA	NA	no
1967	C11orf40	-0.935709	NA	no
1968	C11orf42	1.79152	0.457932	no
1969	C11orf44	0.446937	NA	no
1970	C11orf45	-1.03495	0.0400353	no
1971	C11orf49	-0.42995	0.22288	no
1972	C11orf52	NA	NA	no
1973	C11orf53	NA	NA	no
1974	C11orf54	0.0123432	0.988755	no
1975	C11orf57	-0.274977	0.323751	no
1976	C11orf58	0.315296	0.275019	no
1977	C11orf63	-0.746573	0.304654	no
1978	C11orf65	-0.244609	0.883703	no
1979	C11orf68	-0.0825938	0.930259	no
1980	C11orf70	0.832528	0.366703	no
1981	C11orf71	0.262245	0.787169	no
1982	C11orf72	-0.935709	NA	no
1983	C11orf73	0.199672	0.712011	no
1984	C11orf74	-0.256031	0.543006	no
1985	C11orf80	-0.395436	0.592316	no
1986	C11orf84	-0.24429	0.581528	no
1987	C11orf85	-0.935709	NA	no
1988	C11orf86	2.37679	NA	no
1989	C11orf87	1.258	0.214102	no
1990	C11orf88	-2.97362	NA	no
1991	C11orf91	0.883579	0.422811	no
1992	C11orf94	-0.982257	NA	no
1993	C11orf95	0.719777	0.0562623	no
1994	C11orf96	2.24576	0.0933096	no
1995	C11orf97	NA	NA	no
1996	C11orf98	1.16029	0.0928569	no
1997	C12orf10	-0.0794858	0.886378	no
1998	C12orf29	0.0521483	0.940426	no
1999	C12orf4	-0.177695	0.775385	no
[truncated: 24,365 more rows]

## Sheet: DWON81 0.001
ALDH7A1
ATP2A3
BORA
CAMK2A
CCNB1
CDC20
CDC25C
CDCA3
CDCA8
CDKN2D
CDKN3
CENPA
CHD1L
CHRNA9
CIB2
COL27A1
DBF4B
DDX46
DMC1
DNAJB5
DUSP12
E2F8
ELK3
ERLIN1
FAM64A
FKBP1AP1
FN3KRP
FOXM1
GFAP
GJA5
GOLM1
GRPR
GTSE1
HLA-DPB1
HOXC6
KCNS1
KIF20A
LINC01468
MC1R
MIR503HG
MLPH
MRPL48
MYBL2
NEFH
NPTX2
NRM
PALM3
PAQR5
PAX3
PIK3CD-AS2
PIWIL2
PLK1
PRKCD
PSRC1
PTTG1
QPRT
RAE1
RBM17
RBP1
S100A3
SERPING1
SLCO4A1
SNHG1
SOAT2
SOX7
SSR2
STMN1
STXBP2
STXBP6
TACC3
TACSTD2
TEX261
TMEM106C
TMSB15B
TOE1
TOX2
TPGS2
TROAP
TYMS
WNT7B
ZNF114

## Sheet: go down
1	2	3
Melanogenesis	Cell Cycle, Mitotic	establishment of chromosome localization
response to UV	spindle organization	chromosme localization
DNA repair	microtubule cytoskeleton organization involved in mitosis	mitotic phase plate congression
	regulation of cell cycle process	metaphase plate congression
	Cell Cycle
	mitotic spindle organization
	cell division
	regulation of spindle organization
	mitotic cell cycle process

## Sheet: UP237  0.001
ABCA8
ABCG1
ABHD17A
ACOT1
ACTG2
ADAMTS1
ADAMTS15
AHR
ANKRD30BL
AP1S3
ASPN
ATP5E
ATP8B1
BACH1
BLID
BST1
C1orf198
C3
CACNG8
CBWD5
CDH18
CLDN1
COL4A2
CPEB2
CXCL2
CXCL8
CYP1B1
CYP20A1
DCUN1D3
DDHD1
DEPTOR
DLC1
DMD
EFEMP1
ELN
EPGN
ERCC6
EXOC8
F2R
FAM45A
FGD4
FGL2
FLJ42393
FNDC3B
FOS
FOSB
FZD4
FZD9
GATA6
GATSL2
GNG10
GOLGA2P7
GSR
HECW2
HGF
HIST1H1B
HIST1H1C
HIST1H1D
HIST1H1E
HIST1H2AC
HIST1H2AE
HIST1H2AG
HIST1H2AH
HIST1H2AI
HIST1H2AK
HIST1H2AL
HIST1H2AM
HIST1H2BC
HIST1H2BD
HIST1H2BF
HIST1H2BG
HIST1H2BH
HIST1H2BI
HIST1H2BJ
HIST1H2BK
HIST1H2BM
HIST1H2BN
HIST1H2BO
HIST1H3A
HIST1H3C
HIST1H3D
HIST1H3E
HIST1H3F
HIST1H3G
HIST1H3H
HIST1H3I
HIST1H4B
HIST1H4D
HIST1H4E
HIST1H4H
HIST1H4L
HIST2H2AB
HIST2H2AC
HIST2H2BE
HIST2H2BF
HIST2H3D
HIST4H4
HLA-A
HMX3
IER3
IFI27
IGF2R
IGFBP2
IGFBP7
IL17D
IL1B
IL6
ITPR1
JAG1
JAG2
KCNAB1
KCNQ1OT1
KCTD16
KLHL11
KRT14
LAP3
LDLRAD2
LIF
LINC00472
LINC00657
LINC01197
LOC100133091
LOC100289511
LOC100499194
LOC101929147
LOC221946
LOC339059
LOC439994
LSM12
MAP3K1
MDM2
MEDAG
MEST
MIR663AHG
MOB4
MXD1
MYO1E
NCKAP5
NKD2
NOCT
NOTCH2NL
NR3C2
NSUN5P1
NTN4
NUTM2D
OPN3
OSBP2
PAG1
PAPPA2
PCGF5
PDE3A
PDE5A
PDLIM5
PHACTR2
PKD1L2
PLAC9
PNRC1
PRDM16
PRTG
PTCD1
PTEN
PTGER4
PTGIS
PTX3
RAPH1
RBM4
RBMS2
RC3H1
RGS11
RGS5
RHOB
RIMKLB
RMRP
ROR1
RPL39
RPL41
RPPH1
RPS17
RPS23
RTL1
SCARNA10
SCARNA12
SCARNA2
SCARNA7
SCARNA9
SCRG1
SLC12A2
SLC25A33
SLC30A7
SLC7A5P2
SMG1P5
SMURF1
SNHG16
SNORA16A
SNORA23
SNORA48
SNORA52
SNORA57
SNORA63
SNORA70
SNORA73B
SNORA76C
SNORA7B
SNORD17
SNURF
SNX22
SORBS2
SPTBN1
SRGN
STAG3L3
STX11
SVEP1
TANGO6
TERC
TIMM8B
TIPARP-AS1
TMEM14E
TMEM159
TMEM178A
TMEM178B
TMEM200A
TNXB
TOR1AIP2
TRIM16
TULP4
UBE2V1
UGCG
UVRAG
VTN
ZBTB20
ZBTB46
ZMAT3
ZNF460
ZNF557
ZNF652
ZNF805
ZXDB

## Sheet: go UP
1	2	3	4	5	6	7	8	9	10
negative regulation of cell differentiation	RNA Plumerase I Promoter Opening	Deubiquitination	negative regulation of chromatin silencing	Extracellular matrix organization	lipid localization	bood vessel morphogenesis	response to glucocorticoid
regulation of myeloid cell differentiation	Alcoholism	UCH proteinases	negative regulation of DNA recombination	ECM proteoglycans	regulation of lipid storage	angiogenesis	response to corticosteroid
negative regulation of myeloid cell differentiation	systemic lupus erythematosus	negative reulation of gene expression, epigenetic	regulation of chromatin silencing	NABA CORE MATRISOME	lipid storage	regulation of vasculature development	response to retinoic acid
regulation of hemopoiesis	HDACs deacetylate histones	chromatin organization involved in regulation of transcription	apoptosis induced DNA fragmentation	Non-integrin membrane-ECM interactions		blood vessel development	response to alcohol
SUMOylation of chromatin organization proteins	HCMV infection	regulation of gene expression, epigenetic	positive regulation of gene expression, epigenetic	external encapsulating structure organization		positive regulation of vasculature development	response to mechanical stimulus
DNA replication-independent nucleosome organization	HCMV Late Events	chromatin silencing	chromosome condensation	extracellular structure organization		positive regulation of angiogenesis	response to organophosphorous
megakaryocyte differentiation	HCMV Early Events	chromatin organization involved in negative regulation of transcription	nucleosome positioning	extracellular matrix organization			cellular response to hormone stimulus
negative regulation of megakaryocyte differentiation	HATs acetylate hystones		negative regulation of gene silencing	Elastic fibre formation
DNA replication-independent nucleosome assembly			Apoptotic execution phase	NABA ECM GLYCOPROTEINS
			Formation of Senescence-Associated Heterochromatin Foci (SAHF)	Molecules associated with elastic fibres
