# Supplementary material for: Transcriptional profiling of Hutchinson-Gilford Progeria syndrome fibroblasts reveals deficits in mesenchymal stem cell commitment to differentiation related to early events in endochondral ossification
Source: eLife journal article supplement (doi:10.7554/elife.81290), 2022-12-29
Supplement: table2-data1 [file 0-3-AM-DOWN.xlsx]

## Sheet: Annotation
MyList	Gene ID	Type	Tax ID	Homologene Gene ID	Homologene Gene Tax ID	Gene Symbol	Description	Biological Process (GO)	Protein Function (Protein Atlas)	Subcellular Location (Protein Atlas)	Drug (DrugBank)	Canonical Pathways	Hallmark Gene Sets	GO:0048736 appendage development	GO:0032103 positive regulation of respons	GO:0030855 epithelial cell differentiatio
HOTAIR	100124700	symbol	H. sapiens	100124700	H. sapiens	HOTAIR	HOX transcript antisense RNA							0	0	0
HOXC10	3226	symbol	H. sapiens	3226	H. sapiens	HOXC10	homeobox C10	GO:0021520 spinal cord motor neuron cell fate specification;GO:0048665 neuron fate specification;GO:0021522 spinal cord motor neuron differentiation	Transcription factors:Helix-turn-helix domains; Predicted intracellular proteins	Nuclear bodies (Supported); Additional: Nucleoplasm			(M5901)HALLMARK G2M CHECKPOINT	1	0	0
HOXC11	3227	symbol	H. sapiens	3227	H. sapiens	HOXC11	homeobox C11	GO:0060272 embryonic skeletal joint morphogenesis;GO:0001759 organ induction;GO:0072498 embryonic skeletal joint development	Transcription factors:Helix-turn-helix domains; Predicted intracellular proteins; Cancer-related genes	Nucleoplasm (Supported); Additional: Cytosol				1	0	0
IL21-AS1	100996941	symbol	H. sapiens	100996941	H. sapiens	IL21-AS1	IL21 antisense RNA 1							0	0	0
HOXC-AS3	100874365	symbol	H. sapiens	100874365	H. sapiens	HOXC-AS3	HOXC cluster antisense RNA 3							0	0	0
S1PR1	1901	symbol	H. sapiens	1901	H. sapiens	S1PR1	sphingosine-1-phosphate receptor 1	GO:0003245 cardiac muscle tissue growth involved in heart morphogenesis;GO:0003241 growth involved in heart morphogenesis;GO:0001955 blood vessel maturation	Transporters; FDA approved drug targets:Small molecule drugs; G-protein coupled receptors:Lysolipids receptors; CD markers; Cancer-related genes:Candidate cancer biomarkers; FDA approved drug targets:Biotech drugs; G-protein coupled receptors:GPCRs excl olfactory receptors	Vesicles (Supported)	Fingolimod; Asfotase alfa; Siponimod; Ozanimod	(M103)PID S1P S1P1 PATHWAY; (M155)PID S1P META PATHWAY; (M55)PID S1P S1P3 PATHWAY		0	1	1
NDRG2	57447	symbol	H. sapiens	57447	H. sapiens	NDRG2	NDRG family member 2	GO:0090361 regulation of platelet-derived growth factor production;GO:0021762 substantia nigra development;GO:0010574 regulation of vascular endothelial growth factor production	Predicted intracellular proteins	Centriolar satellite (Approved); Additional: Cytosol;Nucleoplasm		(M254)PID MYC REPRESS PATHWAY	(M5934)HALLMARK XENOBIOTIC METABOLISM	0	0	0
LOC101928370	101928370	Gene_ID	H. sapiens	101928370	H. sapiens	S1PR1-DT	S1PR1 divergent transcript							0	0	0
AARD	441376	symbol	H. sapiens	441376	H. sapiens	AARD	alanine and arginine rich domain containing protein		Predicted intracellular proteins	Lipid droplets (Approved)				0	0	0
GPX7	2882	symbol	H. sapiens	2882	H. sapiens	GPX7	glutathione peroxidase 7	GO:0098869 cellular oxidant detoxification;GO:1990748 cellular detoxification;GO:0097237 cellular response to toxic substance	ENZYME proteins:Oxidoreductases; Predicted secreted proteins; Disease related genes; Potential drug targets; Enzymes		Glutathione		(M5930)HALLMARK EPITHELIAL MESENCHYMAL TRANSITION	0	0	0
PSTPIP1	9051	symbol	H. sapiens	9051	H. sapiens	PSTPIP1	proline-serine-threonine phosphatase interacting protein 1	GO:0030041 actin filament polymerization;GO:0008154 actin polymerization or depolymerization;GO:0051258 protein polymerization	Predicted intracellular proteins; Disease related genes; Human disease related genes:Immune system diseases:Other immune system diseases	Cytosol;Plasma membrane (Supported)				0	0	0
TLR5	7100	symbol	H. sapiens	7100	H. sapiens	TLR5	toll like receptor 5	GO:0034146 toll-like receptor 5 signaling pathway;GO:0002755 MyD88-dependent toll-like receptor signaling pathway;GO:0034123 positive regulation of toll-like receptor signaling pathway	Predicted intracellular proteins; Disease related genes; Human disease related genes:Immune system diseases:Allergies and autoimmune diseases	Golgi apparatus (Approved); Additional: Cytosol;Nucleoplasm				0	1	0
EXPH5	23086	symbol	H. sapiens	23086	H. sapiens	EXPH5	exophilin 5	GO:0003334 keratinocyte development;GO:0071985 multivesicular body sorting pathway;GO:0045921 positive regulation of exocytosis	Human disease related genes:Congenital malformations:Congenital malformations of skin; Predicted intracellular proteins; Disease related genes					0	0	1
C8orf46	254778	gene_synonym	H. sapiens	254778	H. sapiens	VXN	vexin	GO:0030182 neuron differentiation;GO:0048699 generation of neurons;GO:0022008 neurogenesis	Predicted intracellular proteins	Nuclear speckles (Approved)				0	0	0
SLC2A9	56606	symbol	H. sapiens	56606	H. sapiens	SLC2A9	solute carrier family 2 member 9	GO:0015747 urate transport;GO:0046415 urate metabolic process;GO:1904659 glucose transmembrane transport	Human disease related genes:Urinary system diseases:Kidney diseases; Transporters:Electrochemical Potential-driven transporters; Disease related genes; Potential drug targets					0	0	0
HOXC13	3229	symbol	H. sapiens	3229	H. sapiens	HOXC13	homeobox C13	GO:0043587 tongue morphogenesis;GO:0035878 nail development;GO:0043586 tongue development	Transcription factors:Helix-turn-helix domains; Human disease related genes:Congenital malformations:Congenital malformations of skin; Disease related genes; Predicted intracellular proteins; Cancer-related genes					1	0	0
RAET1G	353091	symbol	H. sapiens	353091	H. sapiens	RAET1G	retinoic acid early transcript 1G	GO:0002729 positive regulation of natural killer cell cytokine production;GO:0002727 regulation of natural killer cell cytokine production;GO:0042267 natural killer cell mediated cytotoxicity	Predicted secreted proteins	Plasma membrane;Vesicles (Supported)				0	1	0
FNDC1	84624	symbol	H. sapiens	84624	H. sapiens	FNDC1	fibronectin type III domain containing 1		Predicted secreted proteins; Predicted intracellular proteins	Nuclear speckles (Approved)		(M3008)NABA ECM GLYCOPROTEINS; (M5884)NABA CORE MATRISOME; (M5889)NABA MATRISOME		0	0	0
NINJ2	4815	symbol	H. sapiens	4815	H. sapiens	NINJ2	ninjurin 2	GO:0007158 neuron cell-cell adhesion;GO:0042246 tissue regeneration;GO:0031099 regeneration		Endoplasmic reticulum (Approved); Additional: Centriolar satellite;Cytosol;Nucleoplasm;Plasma membrane				0	0	0
ALDH1A1	216	symbol	H. sapiens	216	H. sapiens	ALDH1A1	aldehyde dehydrogenase 1 family member A1	GO:0030392 fructosamine catabolic process;GO:0030389 fructosamine metabolic process;GO:0009449 gamma-aminobutyric acid biosynthetic process	Enzymes; Predicted intracellular proteins; ENZYME proteins:Oxidoreductases	Cytosol (Enhanced)	NADH; Vitamin A; Tretinoin; 1,4-Dithiothreitol		(M5949)HALLMARK PEROXISOME; (M5948)HALLMARK BILE ACID METABOLISM; (M5935)HALLMARK FATTY ACID METABOLISM	0	0	0
IQCK	124152	symbol	H. sapiens	124152	H. sapiens	IQCK	IQ motif containing K		Predicted intracellular proteins	Nuclear speckles (Approved); Additional: Cytosol				0	0	0
PLCE1	51196	symbol	H. sapiens	51196	H. sapiens	PLCE1	phospholipase C epsilon 1	GO:0006651 diacylglycerol biosynthetic process;GO:0048016 inositol phosphate-mediated signaling;GO:0046339 diacylglycerol metabolic process	ENZYME proteins:Hydrolases; Disease related genes; Potential drug targets; Enzymes; Human disease related genes:Urinary system diseases:Kidney diseases; RAS pathway related proteins; Predicted intracellular proteins	Cytosol (Supported)		(M269)PID RAS PATHWAY		0	0	0
C16orf74	404550	symbol	H. sapiens	404550	H. sapiens	C16orf74	chromosome 16 open reading frame 74		Predicted intracellular proteins	Plasma membrane (Approved); Additional: Centrosome				0	0	0
NOTCH4	4855	symbol	H. sapiens	4855	H. sapiens	NOTCH4	notch receptor 4	GO:0007221 positive regulation of transcription of Notch receptor target;GO:2000048 negative regulation of cell-cell adhesion mediated by cadherin;GO:0001886 endothelial cell morphogenesis	Human disease related genes:Cancers:Cancers of the breast and female genital organs			(M17)PID NOTCH PATHWAY	(M5895)HALLMARK WNT BETA CATENIN SIGNALING; (M5921)HALLMARK COMPLEMENT	0	0	1
GPRC5B	51704	symbol	H. sapiens	51704	H. sapiens	GPRC5B	G protein-coupled receptor class C group 5 member B	GO:0060907 positive regulation of macrophage cytokine production;GO:0010935 regulation of macrophage cytokine production;GO:0061081 positive regulation of myeloid leukocyte cytokine production involved in immune response	G-protein coupled receptors:GPCRs excl olfactory receptors; G-protein coupled receptors:Family 3 (C) receptors; Predicted intracellular proteins	Vesicles (Supported); Additional: Nucleoli;Nucleoplasm			(M5953)HALLMARK KRAS SIGNALING UP	0	1	0

## Sheet: Enrichment
GroupID	Category	Term	Description	LogP	Log(q-value)	InTerm_InList	Genes	Symbols
1_Summary	GO Biological Processes	GO:0048736	appendage development	-3.49322	0	3/177	3226,3227,3229	HOXC10,HOXC11,HOXC13
1_Member	GO Biological Processes	GO:0048736	appendage development	-3.49322	0	3/177	3226,3227,3229	HOXC10,HOXC11,HOXC13
1_Member	GO Biological Processes	GO:0060173	limb development	-3.49322	0	3/177	3226,3227,3229	HOXC10,HOXC11,HOXC13
1_Member	GO Biological Processes	GO:0009952	anterior/posterior pattern specification	-3.27642	0	3/210	3226,3227,3229	HOXC10,HOXC11,HOXC13
1_Member	GO Biological Processes	GO:0003002	regionalization	-2.70363	0	3/332	3226,3227,3229	HOXC10,HOXC11,HOXC13
1_Member	GO Biological Processes	GO:0007389	pattern specification process	-2.35072	0	3/443	3226,3227,3229	HOXC10,HOXC11,HOXC13
2_Summary	GO Biological Processes	GO:0032103	positive regulation of response to external stimulus	-2.35346	0	3/442	1901,51704,353091,7100	S1PR1,GPRC5B,RAET1G,TLR5
2_Member	GO Biological Processes	GO:0032103	positive regulation of response to external stimulus	-2.35346	0	3/442	1901,51704,353091	S1PR1,GPRC5B,RAET1G
2_Member	GO Biological Processes	GO:0001819	positive regulation of cytokine production	-2.26653	0	3/475	7100,51704,353091	TLR5,GPRC5B,RAET1G
3_Summary	GO Biological Processes	GO:0030855	epithelial cell differentiation	-2.09342	0	3/549	1901,4855,23086	S1PR1,NOTCH4,EXPH5
3_Member	GO Biological Processes	GO:0030855	epithelial cell differentiation	-2.09342	0	3/549	1901,4855,23086	S1PR1,NOTCH4,EXPH5
