# Supplementary material for: Transcriptional profiling of Hutchinson-Gilford Progeria syndrome fibroblasts reveals deficits in mesenchymal stem cell commitment to differentiation related to early events in endochondral ossification
Source: eLife journal article supplement (doi:10.7554/elife.81290), 2022-12-29
Supplement: table2-data1 [file ColorByCluster.pdf › Enrichment_GO/ColorByCluster.pdf]

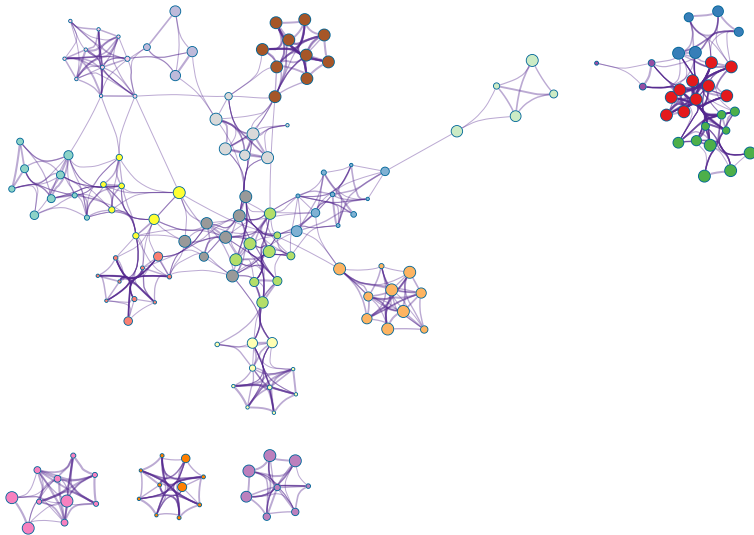

- HDACs deacetylate histones
- Metalloprotease DUBs
- Interleukin-7 signaling
- E3 ubiquitin ligases ubiquitinate target proteins
- Apoptosis induced DNA fragmentation
- Pathways in cancer
- cell projection morphogenesis
- Axon guidance
- transmembrane receptor protein tyrosine kinase sign.
- Hippo signaling pathway
- RUNX1 interacts with co-factors whose precise effect
- ossification
- NABA BASEMENT MEMBRANES
- thrombin-activated receptor signaling pathway
- cell activation
- MAPK family signaling cascades
- Hair follicle development: organogenesis - part 2 of 3
- blood vessel morphogenesis
- regulation of ion transmembrane transport
- negative regulation of developmental growth

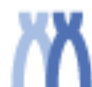

created by  
<http://metascape.org>
