# Supplementary material for: Transcriptional profiling of Hutchinson-Gilford Progeria syndrome fibroblasts reveals deficits in mesenchymal stem cell commitment to differentiation related to early events in endochondral ossification
Source: eLife journal article supplement (doi:10.7554/elife.81290), 2022-12-29
Supplement: table2-data1 [file ColorByCluster.pdf › Enrichment_GO/ColorByCluster.pdf]

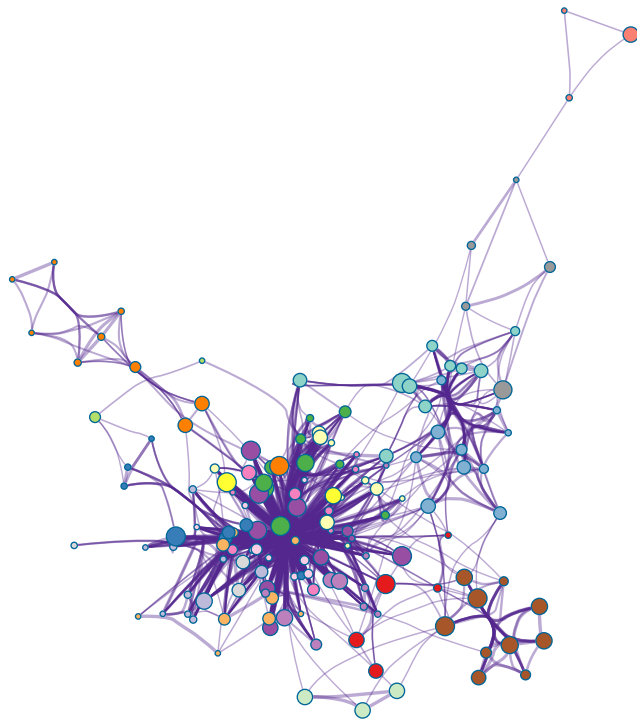

- enzyme linked receptor protein signaling pathway
- muscle structure development
- tube morphogenesis
- tissue morphogenesis
- regulation of cell adhesion
- Pathways in cancer
- positive regulation of protein phosphorylation
- stem cell differentiation
- cell-cell adhesion
- cell morphogenesis
- negative regulation of cellular component movement
- skeletal system development
- Malignant pleural mesothelioma
- positive regulation of cell development
- renal system development
- response to mechanical stimulus
- cardiac chamber morphogenesis
- developmental growth
- homeostasis of number of cells
- positive regulation of apoptotic process
