# Supplementary material for: Transcriptional profiling of Hutchinson-Gilford Progeria syndrome fibroblasts reveals deficits in mesenchymal stem cell commitment to differentiation related to early events in endochondral ossification
Source: eLife journal article supplement (doi:10.7554/elife.81290), 2022-12-29
Supplement: table2-data1 [file ColorByCluster.pdf › Enrichment_GO/ColorByCluster.pdf]

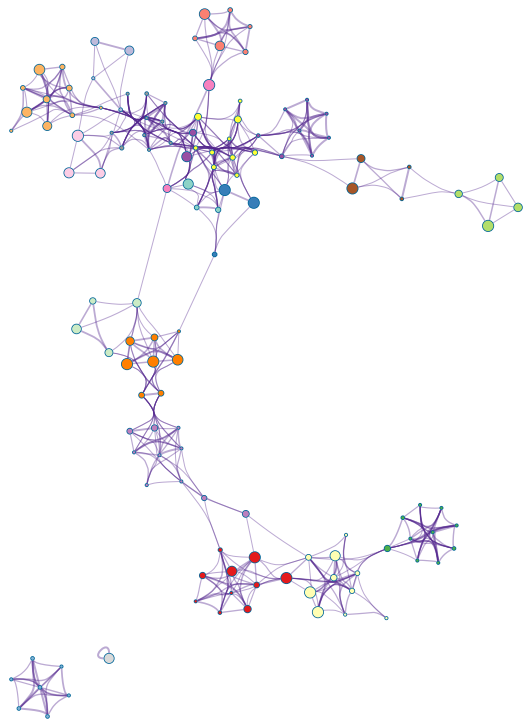

- negative regulation of transport
- Signaling by Interleukins
- neurotransmitter metabolic process
- EGF/EGFR signaling pathway
- blood vessel maturation
- NOD-like receptor signaling pathway
- Platelet activation, signaling and aggregation
- enzyme linked receptor protein signaling pathway
- actin polymerization or depolymerization
- VEGFA-VEGFR2 signaling pathway
- regulation of vesicle-mediated transport
- lamellipodium organization
- response to growth factor
- Sarcoglycan-sarcospan complex SG-SPN
- regulation of leukocyte migration
- regulation of proteolysis
- actin filament-based process
- Neutrophil degranulation
- multi-multicellular organism process
- pattern specification process
