# Supplementary material for: Transcriptional profiling of Hutchinson-Gilford Progeria syndrome fibroblasts reveals deficits in mesenchymal stem cell commitment to differentiation related to early events in endochondral ossification
Source: eLife journal article supplement (doi:10.7554/elife.81290), 2022-12-29
Supplement: table2-data1 [file ColorByCluster.pdf › Enrichment_GO/ColorByCluster.pdf]

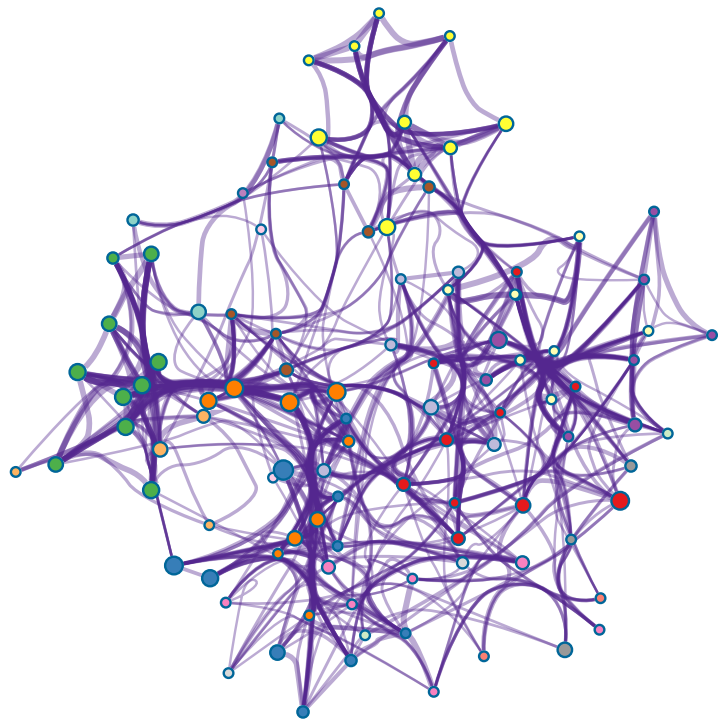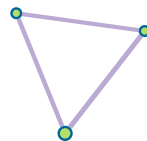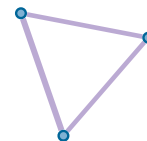

- ossification
- regulation of secretion
- calcium ion homeostasis
- embryonic organ development
- positive regulation of cell motility
- regulation of actin filament organization
- endothelial cell differentiation
- negative regulation of cell development
- Extracellular matrix organization
- positive regulation of hydrolase activity
- positive regulation of epithelial to mesenchymal trans
- angiogenesis
- osteoblast differentiation
- carboxylic acid transport
- regulation of G protein-coupled receptor signaling pa
- nucleic acid phosphodiester bond hydrolysis
- IL-18 signaling pathway
- regulation of nucleotide metabolic process
- Axon guidance
- regulation of cell division
