# Supplementary material for: Transcriptional profiling of Hutchinson-Gilford Progeria syndrome fibroblasts reveals deficits in mesenchymal stem cell commitment to differentiation related to early events in endochondral ossification
Source: eLife journal article supplement (doi:10.7554/elife.81290), 2022-12-29
Supplement: table2-data1 [file ColorByCluster.pdf › Enrichment_GO/ColorByCluster.pdf]

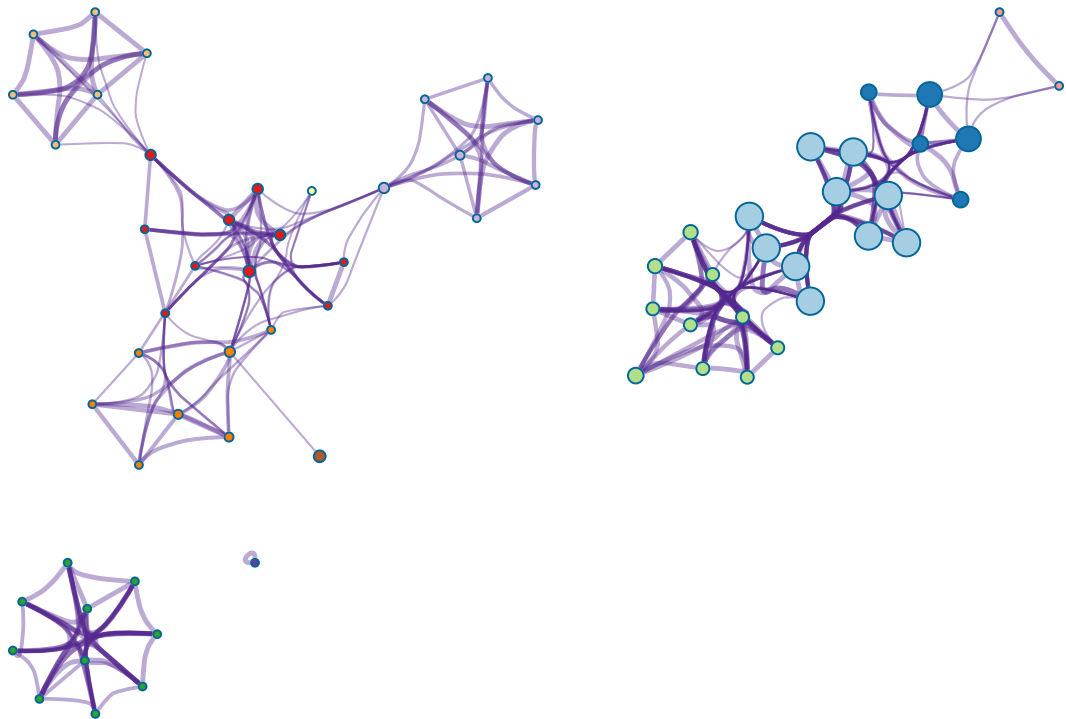

- HDACs deacetylate histones
- Ub-specific processing proteases
- Interleukin-7 signaling
- Apoptosis induced DNA fragmentation
- E3 ubiquitin ligases ubiquitinate target proteins
- positive regulation of protein kinase activity
- positive regulation of cysteine-type endopeptidase ac
- regulation of chemotaxis
- BMP signaling pathway
- Cardiac muscle contraction
- spinal cord development
- negative regulation of cell population proliferation

 created by  
<http://metascape.org>
