# Supplementary material for: Transcriptional profiling of Hutchinson-Gilford Progeria syndrome fibroblasts reveals deficits in mesenchymal stem cell commitment to differentiation related to early events in endochondral ossification
Source: eLife journal article supplement (doi:10.7554/elife.81290), 2022-12-29
Supplement: table2-data1 [file ColorByCluster.pdf › Enrichment_GO/ColorByCluster.pdf]

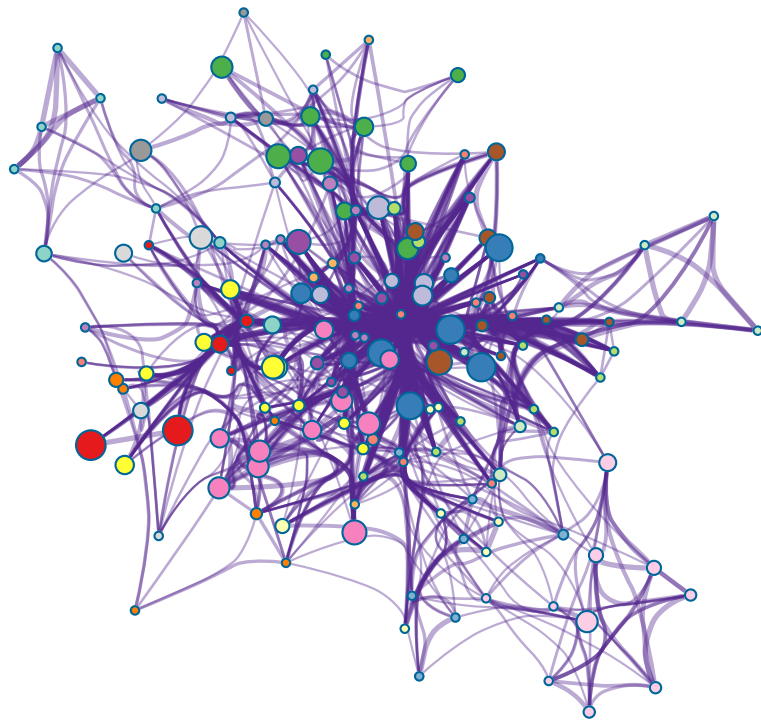

- brain development
- skeletal system development
- Malignant pleural mesothelioma
- Pathways in cancer
- Amyotrophic lateral sclerosis (ALS)
- regulation of cell development
- tube morphogenesis
- neuron projection morphogenesis
- response to inorganic substance
- regulation of neuron death
- establishment or maintenance of cell polarity
- enzyme linked receptor protein signaling pathway
- membranous septum morphogenesis
- Dilated cardiomyopathy
- Hippo signaling regulation pathways
- regulation of stem cell differentiation
- positive regulation of protein localization
- response to cytokine
- cellular response to external stimulus
- skin development
