# Supplementary material for: Transcriptional profiling of Hutchinson-Gilford Progeria syndrome fibroblasts reveals deficits in mesenchymal stem cell commitment to differentiation related to early events in endochondral ossification
Source: eLife journal article supplement (doi:10.7554/elife.81290), 2022-12-29
Supplement: table2-data1 [file ColorByCluster.pdf › Enrichment_GO/ColorByCluster.pdf]

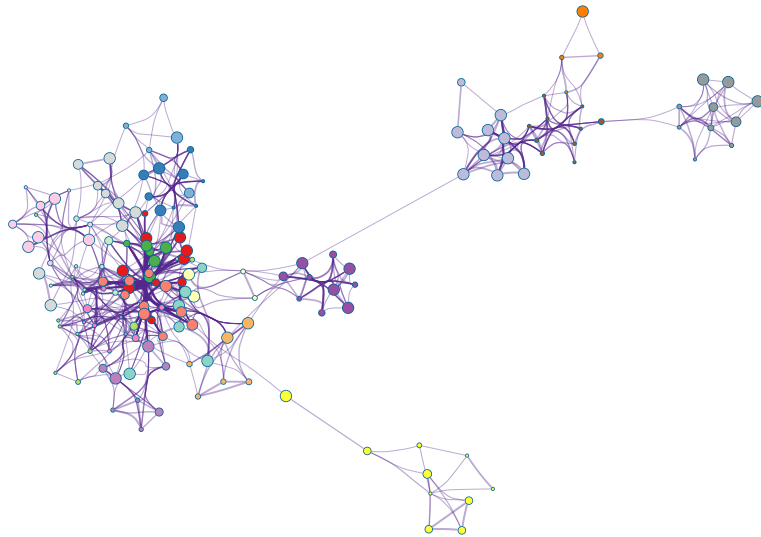

- positive regulation of protein phosphorylation
- regulation of cell adhesion
- positive regulation of locomotion
- cellular response to lipid
- Transport of small molecules
- NABA MATRISOME ASSOCIATED
- Ferroptosis
- EGF/EGFR signaling pathway
- organic hydroxy compound metabolic process
- vasculature development
- response to growth factor
- ion homeostasis
- MAPK signaling pathway
- negative regulation of cell adhesion
- reproductive structure development
- Rap1 signaling pathway
- Signaling by Interleukins
- chemotaxis
- response to wounding
- regulation of leukocyte migration
