# Supplementary material for: Transcriptional profiling of Hutchinson-Gilford Progeria syndrome fibroblasts reveals deficits in mesenchymal stem cell commitment to differentiation related to early events in endochondral ossification
Source: eLife journal article supplement (doi:10.7554/elife.81290), 2022-12-29
Supplement: table2-data1 [file ColorByCluster.pdf › Enrichment_GO/ColorByCluster.pdf]

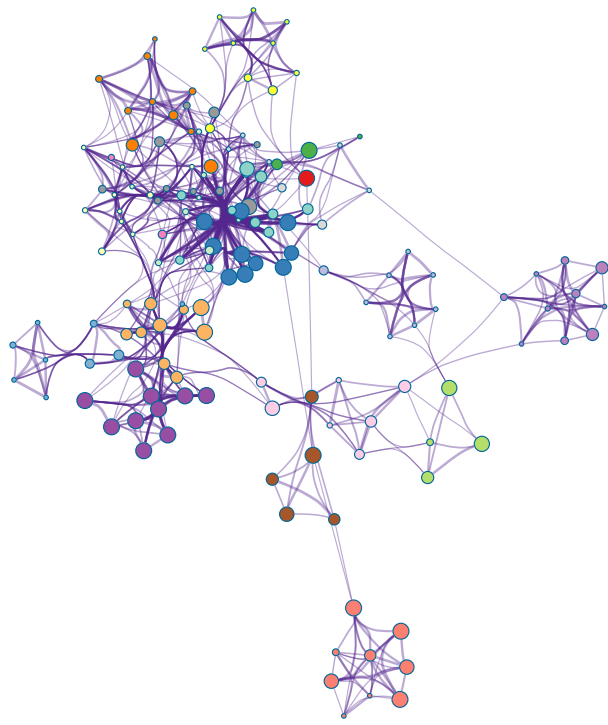

- Malignant pleural mesothelioma
- tissue morphogenesis
- muscle structure development
- cellular component morphogenesis
- skin development
- Hippo-Merlin signaling dysregulation
- enzyme linked receptor protein signaling pathway
- Neural crest differentiation
- Pathways in cancer
- cardiac chamber development
- regulation of morphogenesis of an epithelium
- neurofilament bundle assembly
- regulation of kinase activity
- glial cell differentiation
- telencephalon development
- supramolecular fiber organization
- regulation of anatomical structure size
- ameboidal-type cell migration
- multicellular organismal signaling
- neural tube development

 created by  
<http://metascape.org>
