# Supplementary material for: Transcriptional profiling of Hutchinson-Gilford Progeria syndrome fibroblasts reveals deficits in mesenchymal stem cell commitment to differentiation related to early events in endochondral ossification
Source: eLife journal article supplement (doi:10.7554/elife.81290), 2022-12-29
Supplement: table2-data1 [file ColorByCluster.pdf › Enrichment_GO/ColorByCluster.pdf]

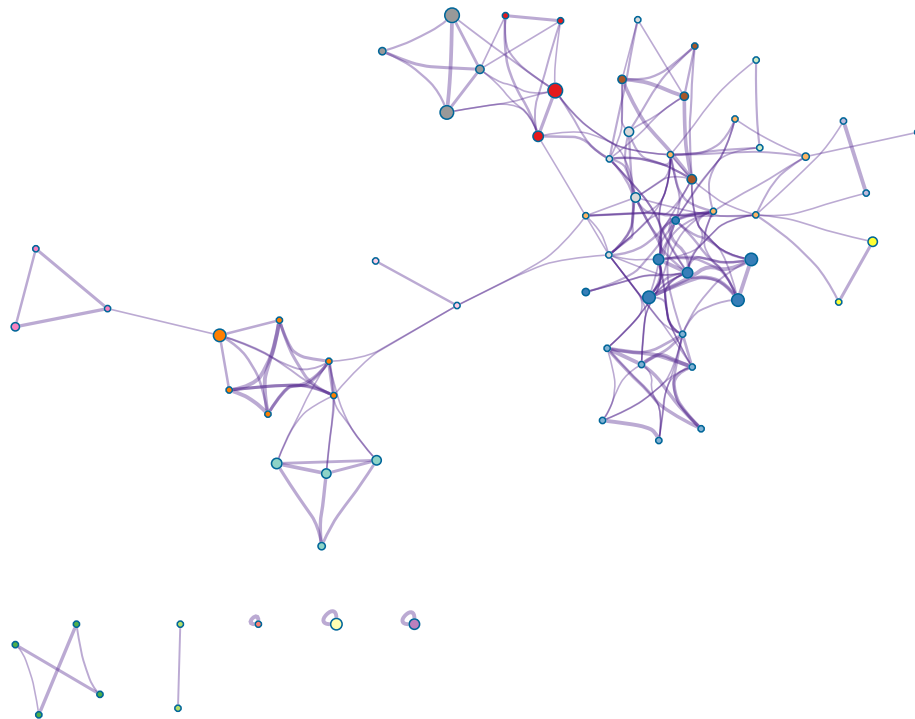

- Cytokine Signaling in Immune system
- positive regulation of apoptotic process
- response to muscle activity
- Inflammatory mediator regulation of TRP channels
- negative regulation of intracellular signal transduction
- Signaling by Nuclear Receptors
- response to oxygen levels
- negative regulation of immune effector process
- response to cytokine
- regionalization
- cell-cell adhesion
- dsRNA processing
- Prion disease pathway
- endodermal cell differentiation
- Melatonin metabolism and effects
- protein targeting to membrane
- Neural crest differentiation
- PID ANGIOPOIETIN RECEPTOR PATHWAY
- supramolecular fiber organization
- Neurotransmitter release cycle
