# Supplementary material for: Transcriptional profiling of Hutchinson-Gilford Progeria syndrome fibroblasts reveals deficits in mesenchymal stem cell commitment to differentiation related to early events in endochondral ossification
Source: eLife journal article supplement (doi:10.7554/elife.81290), 2022-12-29
Supplement: table2-data1 [file ColorByCluster.pdf › Enrichment_GO/ColorByCluster.pdf]

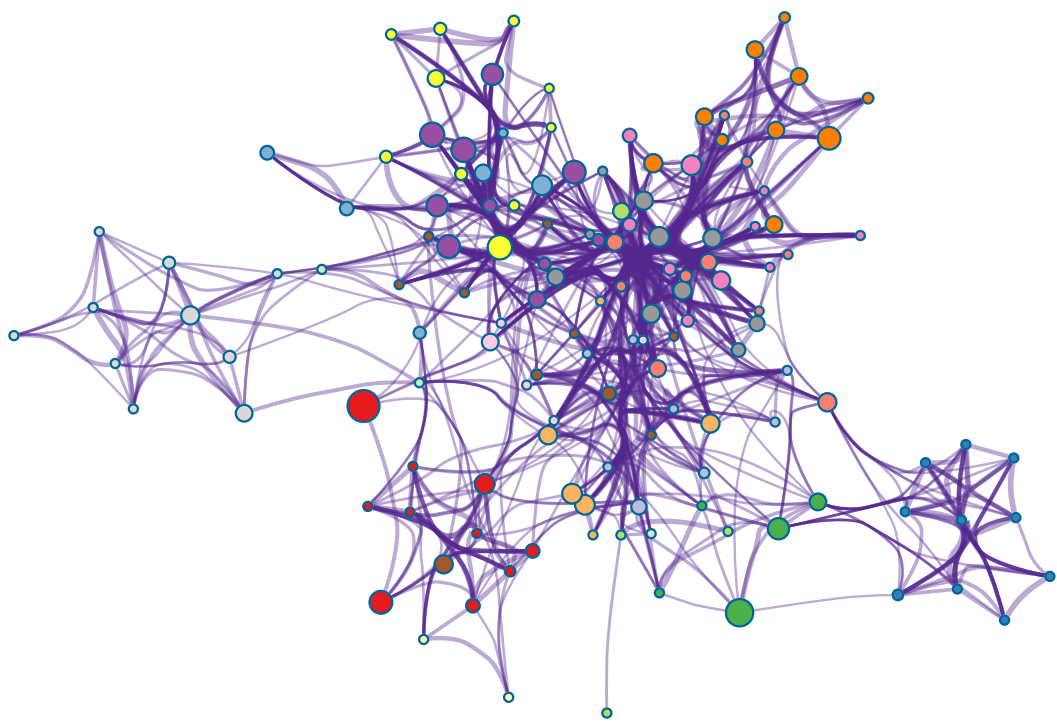

- NABA MATRISOME ASSOCIATED
- Prostaglandin synthesis and regulation
- response to hormone
- positive regulation of cellular component movement
- sensory organ morphogenesis
- negative regulation of cell differentiation
- negative regulation of lipid biosynthetic process
- pattern specification process
- morphogenesis of an epithelium
- Neutrophil degranulation
- Collagen formation
- regulation of fat cell differentiation
- reproductive structure development
- negative regulation of response to external stimulus
- positive regulation of cell death
- Copper homeostasis
- Malignant pleural mesothelioma
- Signaling by Interleukins
- carbohydrate derivative catabolic process
- Interleukin-4 and Interleukin-13 signaling
