# Supplementary material for: Transcriptional profiling of Hutchinson-Gilford Progeria syndrome fibroblasts reveals deficits in mesenchymal stem cell commitment to differentiation related to early events in endochondral ossification
Source: eLife journal article supplement (doi:10.7554/elife.81290), 2022-12-29
Supplement: table2-data1 [file ColorByCluster.pdf › Enrichment_GO/ColorByCluster.pdf]

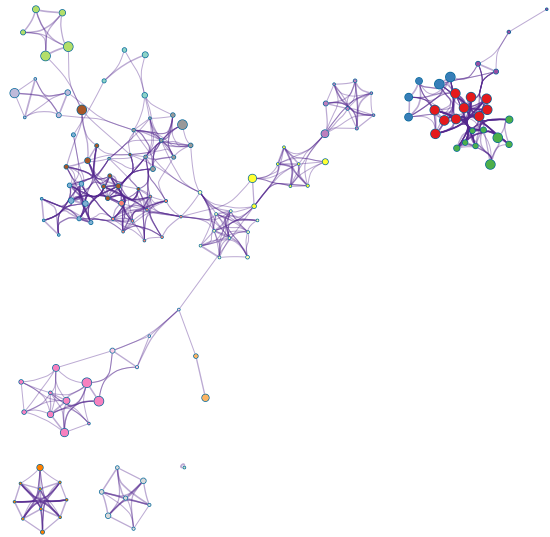

- HDACs deacetylate histones
- Ub-specific processing proteases
- Interleukin-7 signaling
- E3 ubiquitin ligases ubiquitinate target proteins
- Apoptosis induced DNA fragmentation
- TP53 Regulates Metabolic Genes
- cardiac septum morphogenesis
- peptide metabolic process
- Pathways in cancer
- Hippo signaling pathway
- Ca<sup>2+</sup> pathway
- Neuronal System
- mesenchyme morphogenesis
- appendage development
- regulation of neuron death
- telencephalon development
- cell redox homeostasis
- regulation of synapse assembly
- protein localization to mitochondrion
- Amyotrophic lateral sclerosis (ALS)

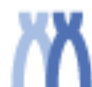

created by  
<http://metascape.org>
