# Supplementary material for: Transcriptional profiling of Hutchinson-Gilford Progeria syndrome fibroblasts reveals deficits in mesenchymal stem cell commitment to differentiation related to early events in endochondral ossification
Source: eLife journal article supplement (doi:10.7554/elife.81290), 2022-12-29
Supplement: table2-data1 [file metascape_result.xlsx]

## Sheet: Annotation
MyList	Gene ID	Type	Tax ID	Homologene Gene ID	Homologene Gene Tax ID	Gene Symbol	Description	Biological Process (GO)	Kinase Class (UniProt)	Protein Function (Protein Atlas)	Subcellular Location (Protein Atlas)	Drug (DrugBank)	Canonical Pathways	Hallmark Gene Sets	WP5087 Malignant pleural mesothelioma	GO:0048729 tissue morphogenesis	GO:0061061 muscle structure development	GO:0032989 cellular component morphogenes	GO:0043588 skin development	WP4541 Hippo-Merlin signaling dysregu	GO:0007167 enzyme linked receptor protein	WP2064 Neural crest differentiation	hsa05200 Pathways in cancer	GO:0003205 cardiac chamber development	GO:1905330 regulation of morphogenesis of	GO:0033693 neurofilament bundle assembly	GO:0043549 regulation of kinase activity	GO:0010001 glial cell differentiation	GO:0021537 telencephalon development	GO:0097435 supramolecular fiber organizat	GO:0090066 regulation of anatomical struc	GO:0001667 ameboidal-type cell migration	GO:0035637 multicellular organismal signa	GO:0021915 neural tube development
ALX4	60529	symbol	H. sapiens	60529	H. sapiens	ALX4	ALX homeobox 4	GO:0035116 embryonic hindlimb morphogenesis;GO:0035115 embryonic forelimb morphogenesis;GO:0035137 hindlimb morphogenesis		Transcription factors:Helix-turn-helix domains; Human disease related genes:Congenital malformations:Congenital malformations of the musculoskeletal system; Human disease related genes:Congenital malformations:Other congenital malformations; Disease related genes; Predicted intracellular proteins	Nucleoplasm (Supported)				0	1	1	0	1	0	0	0	0	1	1	0	0	0	0	0	0	0	0	1
SLITRK1	114798	symbol	H. sapiens	114798	H. sapiens	SLITRK1	SLIT and NTRK like family member 1	GO:0099560 synaptic membrane adhesion;GO:0099174 regulation of presynapse organization;GO:1905606 regulation of presynapse assembly		Predicted secreted proteins; Human disease related genes:Other diseases:Mental and behavioural disorders; Disease related genes					0	0	0	1	0	0	0	0	0	0	0	0	0	0	1	0	0	0	0	0
NRK	203447	symbol	H. sapiens	203447	H. sapiens	NRK	Nik related kinase	GO:0031532 actin cytoskeleton reorganization;GO:0000165 MAPK cascade;GO:0048812 neuron projection morphogenesis	STE Ser/Thr protein kinase family	Enzymes; Kinases:STE Ser/Thr protein kinases; Predicted intracellular proteins; ENZYME proteins:Transferases	Cytosol;Nucleoplasm (Approved)		(M128)PID TNF PATHWAY		0	0	0	1	0	0	0	0	0	0	0	0	0	0	0	1	0	0	0	0
CELSR2	1952	symbol	H. sapiens	1952	H. sapiens	CELSR2	cadherin EGF LAG seven-pass G-type receptor 2	GO:0021999 neural plate anterior/posterior regionalization;GO:0033326 cerebrospinal fluid secretion;GO:0060897 neural plate regionalization		G-protein coupled receptors:GPCRs excl olfactory receptors; G-protein coupled receptors:Family 2 (B) receptors	Cytosol (Approved)			(M5906)HALLMARK ESTROGEN RESPONSE EARLY; (M5907)HALLMARK ESTROGEN RESPONSE LATE; (M5956)HALLMARK KRAS SIGNALING DN	0	0	0	1	0	0	0	1	1	1	1	0	0	0	1	0	0	0	0	0
KRT18	3875	symbol	H. sapiens	3875	H. sapiens	KRT18	keratin 18	GO:0043000 Golgi to plasma membrane CFTR protein transport;GO:0097284 hepatocyte apoptotic process;GO:0043001 Golgi to plasma membrane protein transport		Human disease related genes:Digestive system diseases:Liver diseases; Predicted intracellular proteins; Disease related genes; Cancer-related genes:Candidate cancer biomarkers	Cytosol (Supported)		(M220)PID CASPASE PATHWAY	(M5910)HALLMARK PROTEIN SECRETION; (M5902)HALLMARK APOPTOSIS; (M5906)HALLMARK ESTROGEN RESPONSE EARLY	0	0	0	0	0	0	0	0	0	0	0	1	0	0	0	0	0	0	0	0
LIF	3976	symbol	H. sapiens	3976	H. sapiens	LIF	LIF interleukin 6 family cytokine	GO:1901676 positive regulation of histone H3-K27 acetylation;GO:1901674 regulation of histone H3-K27 acetylation;GO:0072108 positive regulation of mesenchymal to epithelial transition involved in metanephros morphogenesis		Predicted secreted proteins; Predicted intracellular proteins; Cancer-related genes:Candidate cancer biomarkers	Cytosol (Supported)		(M65)PID FRA PATHWAY; (M145)PID P53 DOWNSTREAM PATHWAY; (M5883)NABA SECRETED FACTORS	(M5947)HALLMARK IL2 STAT5 SIGNALING; (M5890)HALLMARK TNFA SIGNALING VIA NFKB; (M5932)HALLMARK INFLAMMATORY RESPONSE	0	1	1	0	0	0	1	0	1	1	1	0	1	0	1	0	0	1	0	0
FOXE1	2304	symbol	H. sapiens	2304	H. sapiens	FOXE1	forkhead box E1	GO:0060465 pharynx development;GO:0060023 soft palate development;GO:0060022 hard palate development		Human disease related genes:Endocrine and metabolic diseases:Thyroid gland diseases; Transcription factors:Helix-turn-helix domains; Predicted intracellular proteins; Disease related genes					0	1	0	0	1	0	0	0	0	0	1	0	0	0	0	0	0	0	0	1
KRT8	3856	symbol	H. sapiens	3856	H. sapiens	KRT8	keratin 8			Human disease related genes:Digestive system diseases:Liver diseases; Predicted intracellular proteins; Disease related genes; Cancer-related genes:Candidate cancer biomarkers	Intermediate filaments (Supported)	Tenecteplase; Lanoteplase; Copper	(M229)PID P38 ALPHA BETA DOWNSTREAM PATHWAY	(M5908)HALLMARK ANDROGEN RESPONSE; (M5906)HALLMARK ESTROGEN RESPONSE EARLY	0	0	0	0	0	0	0	0	0	0	0	0	0	0	0	0	0	0	0	0
TNFSF15	9966	symbol	H. sapiens	9966	H. sapiens	TNFSF15	TNF superfamily member 15	GO:0007250 activation of NF-kappaB-inducing kinase activity;GO:0038061 NIK/NF-kappaB signaling;GO:0006919 activation of cysteine-type endopeptidase activity involved in apoptotic process		Predicted secreted proteins; Predicted intracellular proteins; Human disease related genes:Immune system diseases:Other immune system diseases	Nuclear membrane (Approved); Additional: Cytosol;Nucleoplasm		(M5883)NABA SECRETED FACTORS; (M5885)NABA MATRISOME ASSOCIATED; (M5889)NABA MATRISOME	(M5932)HALLMARK INFLAMMATORY RESPONSE	0	0	0	0	0	0	0	0	0	0	0	0	1	0	0	0	0	0	0	0
ATXN7L2	127002	symbol	H. sapiens	127002	H. sapiens	ATXN7L2	ataxin 7 like 2			Predicted intracellular proteins	Nucleoli rim (Approved); Additional: Cytosol;Vesicles				0	0	0	0	0	0	0	0	0	0	0	0	0	0	0	0	0	0	0	0
GALNT3	2591	symbol	H. sapiens	2591	H. sapiens	GALNT3	polypeptide N-acetylgalactosaminyltransferase 3	GO:0018243 protein O-linked glycosylation via threonine;GO:0018242 protein O-linked glycosylation via serine;GO:0016266 O-glycan processing		Disease related genes; Potential drug targets; Enzymes; Predicted intracellular proteins; ENZYME proteins:Transferases; Human disease related genes:Congenital disorders of metabolism:Other congenital disorders of metabolism	Golgi apparatus (Supported)			(M5953)HALLMARK KRAS SIGNALING UP	0	0	0	0	0	0	1	0	0	0	0	0	0	0	0	0	0	0	0	0
GBX2	2637	symbol	H. sapiens	2637	H. sapiens	GBX2	gastrulation brain homeobox 2	GO:0021568 rhombomere 2 development;GO:0021555 midbrain-hindbrain boundary morphogenesis;GO:0021534 cell proliferation in hindbrain		Transcription factors:Helix-turn-helix domains; Predicted intracellular proteins	Nucleoplasm (Approved)				0	1	0	1	0	0	0	1	0	1	1	0	0	0	1	0	0	1	0	1
ELMSAN1	91748	gene_synonym	H. sapiens	91748	H. sapiens	MIDEAS	mitotic deacetylase associated SANT domain protein	GO:0016575 histone deacetylation;GO:0006476 protein deacetylation;GO:0035601 protein deacylation		Transcription factors:Helix-turn-helix domains; Predicted intracellular proteins	Nucleoplasm (Enhanced)				0	0	0	0	0	0	0	0	0	0	0	0	0	0	0	0	0	0	0	0
NEFL	4747	symbol	H. sapiens	4747	H. sapiens	NEFL	neurofilament light chain	GO:0045105 intermediate filament polymerization or depolymerization;GO:1903937 response to acrylamide;GO:0033693 neurofilament bundle assembly		Predicted intracellular proteins; Human disease related genes:Nervous system diseases:Neurodegenerative diseases; Disease related genes	Intermediate filaments;Nucleoplasm (Approved); Additional: Midbody				0	0	0	1	0	0	0	0	0	0	0	1	0	0	1	1	1	0	0	0
LZTS1	11178	symbol	H. sapiens	11178	H. sapiens	LZTS1	leucine zipper tumor suppressor 1	GO:0016242 negative regulation of macroautophagy;GO:0048814 regulation of dendrite morphogenesis;GO:0010507 negative regulation of autophagy		Predicted intracellular proteins; Disease related genes	Plasma membrane (Approved); Additional: Nucleoli				0	0	0	0	0	0	0	0	0	0	0	0	0	0	1	0	0	0	0	0
SLC7A2	6542	symbol	H. sapiens	6542	H. sapiens	SLC7A2	solute carrier family 7 member 2	GO:0097638 L-arginine import across plasma membrane;GO:1903352 L-ornithine transmembrane transport;GO:1902022 L-lysine transport		Transporters:Electrochemical Potential-driven transporters	Plasma membrane (Supported); Additional: Cell Junctions	L-Lysine; Ornithine		(M5906)HALLMARK ESTROGEN RESPONSE EARLY; (M5932)HALLMARK INFLAMMATORY RESPONSE	0	0	0	0	0	0	0	0	0	0	0	0	0	0	0	0	0	0	0	0
F2RL2	2151	symbol	H. sapiens	2151	H. sapiens	F2RL2	coagulation factor II thrombin receptor like 2	GO:0070493 thrombin-activated receptor signaling pathway;GO:0051482 positive regulation of cytosolic calcium ion concentration involved in phospholipase C-activating G protein-coupled signaling pathway;GO:0035025 positive regulation of Rho protein signal transduction		G-protein coupled receptors:GPCRs excl olfactory receptors			(M138)PID THROMBIN PAR4 PATHWAY; (M193)PID NEPHRIN NEPH1 PATHWAY; (M238)PID THROMBIN PAR1 PATHWAY	(M5946)HALLMARK COAGULATION; (M5947)HALLMARK IL2 STAT5 SIGNALING	0	0	0	0	0	0	0	0	0	0	0	0	0	0	0	0	0	0	0	0
ACTG2	72	symbol	H. sapiens	72	H. sapiens	ACTG2	actin gamma 2, smooth muscle	GO:0090131 mesenchyme migration;GO:0072132 mesenchyme morphogenesis;GO:0090130 tissue migration		Human disease related genes:Congenital malformations:Congenital malformations of the digestive system; Predicted intracellular proteins; Disease related genes			(M16801)SIG REGULATION OF THE ACTIN CYTOSKELETON BY RHO GTPASES	(M5915)HALLMARK APICAL JUNCTION	1	1	0	0	0	1	0	0	0	1	0	0	0	0	0	0	0	1	0	0
TEAD3	7005	symbol	H. sapiens	7005	H. sapiens	TEAD3	TEA domain transcription factor 3	GO:0055059 asymmetric neuroblast division;GO:0055057 neuroblast division;GO:0008356 asymmetric cell division		Transcription factors:Helix-turn-helix domains; Predicted intracellular proteins					1	1	0	0	0	1	0	0	0	1	0	0	0	0	0	0	0	0	0	0
EPHA5	2044	symbol	H. sapiens	2044	H. sapiens	EPHA5	EPH receptor A5	GO:0032793 positive regulation of CREB transcription factor activity;GO:0019933 cAMP-mediated signaling;GO:0019935 cyclic-nucleotide-mediated signaling	Tyr protein kinase family	Enzymes; Kinases:Tyr protein kinases; ENZYME proteins:Transferases		Dasatinib; Fostamatinib	(M177)PID EPHA FWDPATHWAY	(M5956)HALLMARK KRAS SIGNALING DN	0	0	0	1	0	0	1	0	0	0	0	0	1	0	1	0	1	0	0	0
TEAD4	7004	symbol	H. sapiens	7004	H. sapiens	TEAD4	TEA domain transcription factor 4	GO:0001830 trophectodermal cell fate commitment;GO:1902459 positive regulation of stem cell population maintenance;GO:0001829 trophectodermal cell differentiation		Transcription factors:Helix-turn-helix domains; Predicted intracellular proteins	Nucleoplasm (Supported)			(M5909)HALLMARK MYOGENESIS	1	1	1	0	0	1	0	0	0	1	0	0	0	0	0	0	0	1	0	0
SUSD5	26032	symbol	H. sapiens	26032	H. sapiens	SUSD5	sushi domain containing 5	GO:0007219 Notch signaling pathway;GO:0007155 cell adhesion;GO:0022610 biological adhesion		Predicted intracellular proteins	Golgi apparatus;Vesicles (Uncertain)				0	0	0	0	0	0	0	0	0	0	0	0	0	0	0	0	0	0	0	0
NEFM	4741	symbol	H. sapiens	4741	H. sapiens	NEFM	neurofilament medium chain	GO:0033693 neurofilament bundle assembly;GO:0045110 intermediate filament bundle assembly;GO:0045109 intermediate filament organization		Predicted intracellular proteins	Intermediate filaments (Enhanced)				0	0	0	0	0	0	0	0	0	0	0	1	0	0	0	1	0	0	0	0
NRXN3	9369	symbol	H. sapiens	9369	H. sapiens	NRXN3	neurexin 3	GO:0007158 neuron cell-cell adhesion;GO:0071625 vocalization behavior;GO:0035176 social behavior		Predicted intracellular proteins					0	0	0	1	0	0	0	0	0	0	0	0	0	0	0	0	0	0	0	0
MYH11	4629	symbol	H. sapiens	4629	H. sapiens	MYH11	myosin heavy chain 11	GO:0030241 skeletal muscle myosin thick filament assembly;GO:0071688 striated muscle myosin thick filament assembly;GO:0031033 myosin filament organization		Human disease related genes:Cardiovascular diseases:Vascular diseases; Candidate cardiovascular disease genes; Human disease related genes:Congenital malformations:Congenital malformations of the circulatory system; Disease related genes; Predicted intracellular proteins; Cancer-related genes	Cytosol;Plasma membrane (Enhanced)	Tetrafluoroaluminate Ion		(M5909)HALLMARK MYOGENESIS	0	0	1	1	0	0	0	0	0	1	0	0	0	0	0	1	0	0	0	0
RASL10B	91608	symbol	H. sapiens	91608	H. sapiens	RASL10B	RAS like family 10 member B	GO:0003050 regulation of systemic arterial blood pressure by atrial natriuretic peptide;GO:0001990 regulation of systemic arterial blood pressure by hormone;GO:0003044 regulation of systemic arterial blood pressure mediated by a chemical signal		Enzymes; ENZYME proteins:Hydrolases; Predicted intracellular proteins	Vesicles (Approved)				0	0	0	0	0	0	0	0	0	0	0	0	0	0	0	0	0	0	0	0
SUSD2	56241	symbol	H. sapiens	56241	H. sapiens	SUSD2	sushi domain containing 2	GO:0051782 negative regulation of cell division;GO:1902807 negative regulation of cell cycle G1/S phase transition;GO:0051302 regulation of cell division			Plasma membrane (Approved)				0	0	0	0	0	0	0	0	0	0	0	0	0	0	0	0	0	0	0	0
FZD2	2535	symbol	H. sapiens	2535	H. sapiens	FZD2	frizzled class receptor 2	GO:0003150 muscular septum morphogenesis;GO:0003149 membranous septum morphogenesis;GO:0060022 hard palate development		Cancer-related genes:Candidate cancer biomarkers; Human disease related genes:Congenital malformations:Congenital malformations of the musculoskeletal system; G-protein coupled receptors:Family fz/smo receptors; Disease related genes; G-protein coupled receptors:GPCRs excl olfactory receptors; Potential drug targets	Nuclear bodies;Nucleoplasm (Approved); Additional: Cell Junctions		(M77)PID WNT SIGNALING PATHWAY; (M23)PID WNT NONCANONICAL PATHWAY; (M5493)WNT SIGNALING	(M5942)HALLMARK UV RESPONSE DN	1	1	1	0	1	1	0	0	1	1	1	1	0	0	0	0	0	0	0	1
PHC2	1912	symbol	H. sapiens	1912	H. sapiens	PHC2	polyhomeotic homolog 2	GO:0045892 negative regulation of transcription, DNA-templated;GO:1903507 negative regulation of nucleic acid-templated transcription;GO:1902679 negative regulation of RNA biosynthetic process		Predicted intracellular proteins	Nucleoplasm (Supported)				0	0	0	0	0	0	0	0	0	0	0	0	0	0	0	0	0	0	0	0
LDB3	11155	symbol	H. sapiens	11155	H. sapiens	LDB3	LIM domain binding 3	GO:0045214 sarcomere organization;GO:0030239 myofibril assembly;GO:0055002 striated muscle cell development		Predicted intracellular proteins; Human disease related genes:Musculoskeletal diseases:Muscular diseases; Human disease related genes:Cardiovascular diseases:Cardiac diseases; Disease related genes	Cytosol;Focal adhesion sites (Supported); Additional: Nucleoplasm			(M5909)HALLMARK MYOGENESIS	0	0	1	1	0	0	0	0	0	1	0	0	0	0	0	1	0	0	0	0
FAHD2B	151313	symbol	H. sapiens	151313	H. sapiens	FAHD2B	fumarylacetoacetate hydrolase domain containing 2B			Predicted intracellular proteins					0	0	0	0	0	0	0	0	0	0	0	0	0	0	0	0	0	0	0	0
DHCR7	1717	symbol	H. sapiens	1717	H. sapiens	DHCR7	7-dehydrocholesterol reductase	GO:0016128 phytosteroid metabolic process;GO:0016129 phytosteroid biosynthetic process;GO:0016131 brassinosteroid metabolic process		ENZYME proteins:Oxidoreductases; Human disease related genes:Congenital disorders of metabolism:Congenital disorders of lipid/glycolipid metabolism; Disease related genes; Potential drug targets; Enzymes	Endoplasmic reticulum (Supported)	NADH		(M5892)HALLMARK CHOLESTEROL HOMEOSTASIS; (M5905)HALLMARK ADIPOGENESIS; (M5906)HALLMARK ESTROGEN RESPONSE EARLY	0	0	0	0	0	0	0	0	0	0	0	0	0	0	0	0	0	0	0	0
SARDH	1757	symbol	H. sapiens	1757	H. sapiens	SARDH	sarcosine dehydrogenase	GO:1901053 sarcosine catabolic process;GO:1901052 sarcosine metabolic process;GO:0042219 cellular modified amino acid catabolic process		ENZYME proteins:Oxidoreductases; Disease related genes; Potential drug targets; Enzymes; Predicted intracellular proteins	Mitochondria (Approved)				0	0	0	0	0	0	0	0	0	0	0	0	0	0	0	0	0	0	0	0
ITGB4	3691	symbol	H. sapiens	3691	H. sapiens	ITGB4	integrin subunit beta 4	GO:0061450 trophoblast cell migration;GO:0032290 peripheral nervous system myelin formation;GO:0031581 hemidesmosome assembly		CD markers; Cancer-related genes:Candidate cancer biomarkers; Human disease related genes:Congenital malformations:Congenital malformations of skin; Disease related genes; Predicted intracellular proteins	Cell Junctions;Plasma membrane (Supported)	R1295	(M158)PID INTEGRIN4 PATHWAY; (M47)PID INTEGRIN CS PATHWAY; (M65)PID FRA PATHWAY	(M5909)HALLMARK MYOGENESIS; (M5915)HALLMARK APICAL JUNCTION; (M5939)HALLMARK P53 PATHWAY	1	1	0	1	1	1	0	0	1	1	0	0	0	1	0	0	0	1	0	0
GGT5	2687	symbol	H. sapiens	2687	H. sapiens	GGT5	gamma-glutamyltransferase 5	GO:1901748 leukotriene D4 metabolic process;GO:1901750 leukotriene D4 biosynthetic process;GO:0006751 glutathione catabolic process		Enzymes; ENZYME proteins:Hydrolases; Predicted intracellular proteins; ENZYME proteins:Transferases	Nucleoli fibrillar center (Approved)				0	0	0	0	0	0	0	0	0	0	0	0	0	0	0	0	0	0	0	0
LUZP2	338645	symbol	H. sapiens	338645	H. sapiens	LUZP2	leucine zipper protein 2			Predicted secreted proteins; Predicted intracellular proteins	Cytosol;Nucleoplasm (Approved); Additional: Plasma membrane				0	0	0	0	0	0	0	0	0	0	0	0	0	0	0	0	0	0	0	0
NTRK2	4915	symbol	H. sapiens	4915	H. sapiens	NTRK2	neurotrophic receptor tyrosine kinase 2	GO:0099540 trans-synaptic signaling by neuropeptide;GO:0099551 trans-synaptic signaling by neuropeptide, modulating synaptic transmission;GO:0099538 synaptic signaling via neuropeptide	Tyr protein kinase family	Human disease related genes:Nervous system diseases:Epilepsy; FDA approved drug targets:Small molecule drugs; Cancer-related genes:Candidate cancer biomarkers; Human disease related genes:Cancers:Cancers of eye, brain, and central nervous system; Kinases:Tyr protein kinases; Disease related genes; Enzymes; RAS pathway related proteins; ENZYME proteins:Transferases	Plasma membrane (Supported)	Amitriptyline; Esketamine; Entrectinib; Fostamatinib; Larotrectinib	(M142)PID AJDISS 2PATHWAY; (M100)PID SHP2 PATHWAY; (M187)PID TRKR PATHWAY		1	1	0	0	0	1	1	0	0	0	0	0	1	1	1	0	0	1	1	0
COL4A1	1282	symbol	H. sapiens	1282	H. sapiens	COL4A1	collagen type IV alpha 1 chain	GO:0061304 retinal blood vessel morphogenesis;GO:0061299 retina vasculature morphogenesis in camera-type eye;GO:0038063 collagen-activated tyrosine kinase receptor signaling pathway		Human disease related genes:Cardiovascular diseases:Vascular diseases; Human disease related genes:Congenital malformations:Congenital malformations of the nervous system; Human disease related genes:Congenital malformations:Congenital malformations of the circulatory system; Predicted secreted proteins; Disease related genes; Predicted intracellular proteins			(M5887)NABA BASEMENT MEMBRANES; (M53)PID INTEGRIN3 PATHWAY; (M3005)NABA COLLAGENS	(M5905)HALLMARK ADIPOGENESIS; (M5930)HALLMARK EPITHELIAL MESENCHYMAL TRANSITION	1	1	0	1	1	0	1	0	1	1	0	0	0	0	1	0	0	0	0	0
PLCH2	9651	symbol	H. sapiens	9651	H. sapiens	PLCH2	phospholipase C eta 2	GO:0048015 phosphatidylinositol-mediated signaling;GO:0048017 inositol lipid-mediated signaling;GO:0046488 phosphatidylinositol metabolic process		Enzymes; ENZYME proteins:Hydrolases; Predicted intracellular proteins					0	0	0	0	0	0	0	0	0	0	0	0	0	0	0	0	0	0	0	0
BATF3	55509	symbol	H. sapiens	55509	H. sapiens	BATF3	basic leucine zipper ATF-like transcription factor 3	GO:0043011 myeloid dendritic cell differentiation;GO:0001773 myeloid dendritic cell activation;GO:0097028 dendritic cell differentiation		Transcription factors:Basic domains; Predicted intracellular proteins	Nucleoli (Supported); Additional: Cytosol;Nucleoplasm		(M235)PID TCR CALCIUM PATHWAY; (M60)PID NFAT TFPATHWAY	(M5947)HALLMARK IL2 STAT5 SIGNALING	0	0	0	0	0	0	0	0	0	0	0	0	0	0	0	0	0	0	0	0
TEAD2	8463	symbol	H. sapiens	8463	H. sapiens	TEAD2	TEA domain transcription factor 2	GO:0048368 lateral mesoderm development;GO:0048339 paraxial mesoderm development;GO:0030903 notochord development		Transcription factors:Helix-turn-helix domains; Predicted intracellular proteins	Nucleoplasm (Supported)				1	1	0	0	0	1	0	0	0	1	0	0	0	0	0	0	0	1	0	1
ATF3	467	symbol	H. sapiens	467	H. sapiens	ATF3	activating transcription factor 3	GO:0061394 regulation of transcription from RNA polymerase II promoter in response to arsenic-containing substance;GO:1903984 positive regulation of TRAIL-activated apoptotic signaling pathway;GO:1903121 regulation of TRAIL-activated apoptotic signaling pathway		Transcription factors:Basic domains; Predicted intracellular proteins	Nucleoli;Nucleoplasm (Supported)		(M166)PID ATF2 PATHWAY; (M167)PID AP1 PATHWAY; (M2)PID SMAD2 3NUCLEAR PATHWAY	(M5892)HALLMARK CHOLESTEROL HOMEOSTASIS; (M5922)HALLMARK UNFOLDED PROTEIN RESPONSE; (M5941)HALLMARK UV RESPONSE UP	1	0	1	0	0	0	0	0	1	1	0	0	0	0	0	0	0	0	0	0
BCAM	4059	symbol	H. sapiens	4059	H. sapiens	BCAM	basal cell adhesion molecule (Lutheran blood group)	GO:0007160 cell-matrix adhesion;GO:0031589 cell-substrate adhesion;GO:0007155 cell adhesion		Blood group antigen proteins; Predicted intracellular proteins; CD markers	Nucleoli fibrillar center (Approved)			(M5898)HALLMARK DNA REPAIR; (M5945)HALLMARK HEME METABOLISM	0	0	0	0	0	0	0	0	0	0	0	0	0	0	0	0	0	0	0	0
MAB21L2	10586	symbol	H. sapiens	10586	H. sapiens	MAB21L2	mab-21 like 2	GO:0010172 embryonic body morphogenesis;GO:0010171 body morphogenesis;GO:0043010 camera-type eye development		Human disease related genes:Congenital malformations:Congenital malformations of eye; Predicted intracellular proteins; Disease related genes	Nucleoplasm (Enhanced)				0	1	0	0	0	0	0	0	0	0	0	0	0	0	0	0	0	0	0	0
GLIS1	148979	symbol	H. sapiens	148979	H. sapiens	GLIS1	GLIS family zinc finger 1	GO:0000122 negative regulation of transcription by RNA polymerase II;GO:0045944 positive regulation of transcription by RNA polymerase II;GO:0045892 negative regulation of transcription, DNA-templated		Predicted intracellular proteins; Transcription factors:Zinc-coordinating DNA-binding domains	Nucleoplasm (Approved); Additional: Cytosol;Mitochondria				0	0	0	0	0	0	0	0	0	0	0	0	0	0	0	0	0	0	0	0
PCDH10	57575	symbol	H. sapiens	57575	H. sapiens	PCDH10	protocadherin 10	GO:0007156 homophilic cell adhesion via plasma membrane adhesion molecules;GO:0098742 cell-cell adhesion via plasma-membrane adhesion molecules;GO:0098609 cell-cell adhesion			Golgi apparatus (Approved); Additional: Nucleoplasm;Vesicles				0	0	0	0	0	0	0	0	0	0	0	0	0	0	0	0	0	0	0	0
CCDC81	60494	symbol	H. sapiens	60494	H. sapiens	CCDC81	coiled-coil domain containing 81			Predicted intracellular proteins					0	0	0	0	0	0	0	0	0	0	0	0	0	0	0	0	0	0	0	0
FADS2	9415	symbol	H. sapiens	9415	H. sapiens	FADS2	fatty acid desaturase 2	GO:0036109 alpha-linolenic acid metabolic process;GO:0043651 linoleic acid metabolic process;GO:0006636 unsaturated fatty acid biosynthetic process		Enzymes; FDA approved drug targets:Small molecule drugs; Predicted intracellular proteins; ENZYME proteins:Oxidoreductases		alpha-Linolenic acid		(M5892)HALLMARK CHOLESTEROL HOMEOSTASIS; (M5948)HALLMARK BILE ACID METABOLISM; (M5924)HALLMARK MTORC1 SIGNALING	0	0	0	0	0	0	0	0	0	0	0	0	0	0	0	0	0	0	0	0
TMSB15A	11013	symbol	H. sapiens	11013	H. sapiens	TMSB15A	thymosin beta 15A	GO:0042989 sequestering of actin monomers;GO:0030837 negative regulation of actin filament polymerization;GO:0032507 maintenance of protein location in cell		Predicted intracellular proteins					0	0	0	0	0	0	0	0	0	0	0	0	0	0	0	1	1	0	0	0
TCF7L1	83439	symbol	H. sapiens	83439	H. sapiens	TCF7L1	transcription factor 7 like 1	GO:0060070 canonical Wnt signaling pathway;GO:0016055 Wnt signaling pathway;GO:0198738 cell-cell signaling by wnt		Transcription factors:Other all-alpha-helical DNA-binding domains; Predicted intracellular proteins	Nucleoplasm (Supported); Additional: Cytosol		(M236)PID DELTA NP63 PATHWAY; (M223)PID BETA CATENIN NUC PATHWAY; (M5493)WNT SIGNALING	(M5956)HALLMARK KRAS SIGNALING DN	1	0	0	0	0	1	0	1	1	0	1	0	0	0	0	0	0	0	0	0
XKR5	389610	symbol	H. sapiens	389610	H. sapiens	XKR5	XK related 5	GO:0070782 phosphatidylserine exposure on apoptotic cell surface;GO:0043652 engulfment of apoptotic cell;GO:0017121 plasma membrane phospholipid scrambling		Transporters:Electrochemical Potential-driven transporters					0	0	0	0	0	0	0	0	0	0	0	0	0	0	0	0	0	0	0	0
SCN3A	6328	symbol	H. sapiens	6328	H. sapiens	SCN3A	sodium voltage-gated channel alpha subunit 3	GO:0086010 membrane depolarization during action potential;GO:0019228 neuronal action potential;GO:0051899 membrane depolarization		Voltage-gated ion channels:Voltage-Gated Sodium Channels; Human disease related genes:Nervous system diseases:Epilepsy; FDA approved drug targets:Small molecule drugs; Disease related genes		Phenytoin; Zonisamide; Tetrodotoxin; Lacosamide			0	0	0	1	0	0	0	0	0	0	0	0	0	0	0	0	0	0	1	0
TCEAL2	140597	symbol	H. sapiens	140597	H. sapiens	TCEAL2	transcription elongation factor A like 2			Predicted intracellular proteins	Nuclear speckles (Approved); Additional: Cytosol				0	0	0	0	0	0	0	0	0	0	0	0	0	0	0	0	0	0	0	0
TP53BP2	7159	symbol	H. sapiens	7159	H. sapiens	TP53BP2	tumor protein p53 binding protein 2	GO:1900119 positive regulation of execution phase of apoptosis;GO:1900117 regulation of execution phase of apoptosis;GO:0072332 intrinsic apoptotic signaling pathway by p53 class mediator		Predicted intracellular proteins; Cancer-related genes:Candidate cancer biomarkers	Cell Junctions;Cytosol (Enhanced)		(M145)PID P53 DOWNSTREAM PATHWAY		0	0	0	0	0	1	0	0	0	0	0	0	0	0	0	0	0	0	0	0
MAP3K9	4293	symbol	H. sapiens	4293	H. sapiens	MAP3K9	mitogen-activated protein kinase kinase kinase 9	GO:0000165 MAPK cascade;GO:0046777 protein autophosphorylation;GO:0043065 positive regulation of apoptotic process	STE Ser/Thr protein kinase family	Disease related genes; Potential drug targets; Enzymes; Kinases:STE Ser/Thr protein kinases; Predicted intracellular proteins; ENZYME proteins:Transferases	Nucleoli;Nucleoplasm (Approved)	12-(2-hydroxyethyl)-2-(1-methylethoxy)-13,14-dihydronaphtho[2,1-a]pyrrolo[3,4-c]carbazol-5(12H)-one; Fostamatinib			1	0	0	0	0	0	0	0	0	0	0	0	0	0	0	0	0	0	0	0
PDE6B	5158	symbol	H. sapiens	5158	H. sapiens	PDE6B	phosphodiesterase 6B	GO:1990009 retinal cell apoptotic process;GO:0007603 phototransduction, visible light;GO:0043153 entrainment of circadian clock by photoperiod		ENZYME proteins:Hydrolases; Human disease related genes:Nervous system diseases:Eye disease; Disease related genes; Enzymes; Predicted intracellular proteins	Cytosol (Approved)		(M204)PID RHODOPSIN PATHWAY	(M5956)HALLMARK KRAS SIGNALING DN	0	1	0	0	0	0	0	0	0	0	0	0	0	0	0	0	0	0	0	0
FBXO44	93611	symbol	H. sapiens	93611	H. sapiens	FBXO44	F-box protein 44	GO:0006516 glycoprotein catabolic process;GO:0031146 SCF-dependent proteasomal ubiquitin-dependent protein catabolic process;GO:0030433 ubiquitin-dependent ERAD pathway		Predicted intracellular proteins	Nucleoplasm (Approved)				0	0	0	0	0	0	0	0	0	0	0	0	0	0	0	0	0	0	0	0
ABCB9	23457	symbol	H. sapiens	23457	H. sapiens	ABCB9	ATP binding cassette subfamily B member 9	GO:0035672 oligopeptide transmembrane transport;GO:0006857 oligopeptide transport;GO:0019885 antigen processing and presentation of endogenous peptide antigen via MHC class I		Transporters:Primary Active Transporters; Predicted intracellular proteins	Vesicles (Supported)			(M5949)HALLMARK PEROXISOME	0	0	0	0	0	0	0	0	0	0	0	0	0	0	0	0	0	0	0	0
COL4A2	1284	symbol	H. sapiens	1284	H. sapiens	COL4A2	collagen type IV alpha 2 chain	GO:0038063 collagen-activated tyrosine kinase receptor signaling pathway;GO:0038065 collagen-activated signaling pathway;GO:0035987 endodermal cell differentiation		Human disease related genes:Cardiovascular diseases:Vascular diseases; Human disease related genes:Congenital malformations:Congenital malformations of the nervous system; Cancer-related genes:Candidate cancer biomarkers; Predicted secreted proteins; Disease related genes; Predicted intracellular proteins	Vesicles (Supported)		(M5887)NABA BASEMENT MEMBRANES; (M3005)NABA COLLAGENS; (M5884)NABA CORE MATRISOME	(M5909)HALLMARK MYOGENESIS; (M5921)HALLMARK COMPLEMENT; (M5930)HALLMARK EPITHELIAL MESENCHYMAL TRANSITION	1	1	0	1	0	0	1	0	1	1	0	0	0	0	0	0	0	0	0	0
GPRC5A	9052	symbol	H. sapiens	9052	H. sapiens	GPRC5A	G protein-coupled receptor class C group 5 member A	GO:0007175 negative regulation of epidermal growth factor-activated receptor activity;GO:0042059 negative regulation of epidermal growth factor receptor signaling pathway;GO:0007176 regulation of epidermal growth factor-activated receptor activity		G-protein coupled receptors:GPCRs excl olfactory receptors; G-protein coupled receptors:Family 3 (C) receptors; Predicted intracellular proteins	Plasma membrane;Vesicles (Enhanced)	Tretinoin			0	0	0	0	0	0	0	0	0	0	0	0	1	0	0	0	0	0	0	0
LOC728392	728392	Gene_ID	H. sapiens	728392	H. sapiens	LOC728392	uncharacterized LOC728392								0	0	0	0	0	0	0	0	0	0	0	0	0	0	0	0	0	0	0	0
AFAP1L2	84632	symbol	H. sapiens	84632	H. sapiens	AFAP1L2	actin filament associated protein 1 like 2	GO:0045742 positive regulation of epidermal growth factor receptor signaling pathway;GO:1901186 positive regulation of ERBB signaling pathway;GO:0061098 positive regulation of protein tyrosine kinase activity		Predicted intracellular proteins	Cytosol;Plasma membrane (Approved)			(M5916)HALLMARK APICAL SURFACE	0	0	0	0	0	0	0	0	0	0	0	0	1	0	0	0	0	0	0	0
FOSL2	2355	symbol	H. sapiens	2355	H. sapiens	FOSL2	FOS like 2, AP-1 transcription factor subunit	GO:0003334 keratinocyte development;GO:0048146 positive regulation of fibroblast proliferation;GO:0048145 regulation of fibroblast proliferation		Transcription factors:Basic domains; Predicted intracellular proteins	Nucleoplasm (Enhanced)		(M65)PID FRA PATHWAY; (M236)PID DELTA NP63 PATHWAY; (M167)PID AP1 PATHWAY	(M5890)HALLMARK TNFA SIGNALING VIA NFKB; (M5891)HALLMARK HYPOXIA	0	0	0	0	1	0	0	0	0	1	0	0	0	0	0	0	0	0	0	0
RASGRP1	10125	symbol	H. sapiens	10125	H. sapiens	RASGRP1	RAS guanyl releasing protein 1	GO:0032825 positive regulation of natural killer cell differentiation;GO:0033089 positive regulation of T cell differentiation in thymus;GO:0032252 secretory granule localization		RAS pathway related proteins; Predicted intracellular proteins; Disease related genes	Cytosol (Supported); Additional: Plasma membrane		(M269)PID RAS PATHWAY; (M88)PID CD8 TCR PATHWAY; (M34)PID TCR PATHWAY	(M5941)HALLMARK UV RESPONSE UP; (M5906)HALLMARK ESTROGEN RESPONSE EARLY; (M5921)HALLMARK COMPLEMENT	0	0	0	0	0	0	0	0	1	0	0	0	1	0	0	0	0	0	0	0
PGAM1P5	100132594	symbol	H. sapiens	100132594	H. sapiens	PGAM1P5	phosphoglycerate mutase 1 pseudogene 5								0	0	0	0	0	0	0	0	0	0	0	0	0	0	0	0	0	0	0	0
NIPAL4	348938	symbol	H. sapiens	348938	H. sapiens	NIPAL4	NIPA like domain containing 4	GO:1903830 magnesium ion transmembrane transport;GO:0015693 magnesium ion transport;GO:0098662 inorganic cation transmembrane transport		Human disease related genes:Congenital malformations:Congenital malformations of skin; Transporters:Electrochemical Potential-driven transporters; Disease related genes; Potential drug targets					0	0	0	0	0	0	0	0	0	0	0	0	0	0	0	0	0	0	0	0
PLAT	5327	symbol	H. sapiens	5327	H. sapiens	PLAT	plasminogen activator, tissue type	GO:0060279 positive regulation of ovulation;GO:0060278 regulation of ovulation;GO:0099183 trans-synaptic signaling by BDNF, modulating synaptic transmission		FDA approved drug targets:Small molecule drugs; Candidate cardiovascular disease genes; Cancer-related genes:Candidate cancer biomarkers; ENZYME proteins:Hydrolases; Predicted secreted proteins; FDA approved drug targets:Biotech drugs; Disease related genes; Enzymes; Peptidases:Serine-type peptidases	Actin filaments (Approved)	Aminocaproic acid; Iloprost; Human C1-esterase inhibitor; 5-(DIMETHYLAMINO)-2-NAPHTHALENESULFONIC ACID; Dexibuprofen; Conestat alfa	(M169)PID INTEGRIN2 PATHWAY; (M159)PID AMB2 NEUTROPHILS PATHWAY; (M3468)NABA ECM REGULATORS	(M5946)HALLMARK COAGULATION; (M5902)HALLMARK APOPTOSIS; (M5921)HALLMARK COMPLEMENT	0	0	0	0	0	0	1	0	0	0	0	0	0	0	0	0	0	0	0	0
POLB	5423	symbol	H. sapiens	5423	H. sapiens	POLB	DNA polymerase beta	GO:0006286 base-excision repair, base-free sugar-phosphate removal;GO:0098502 DNA dephosphorylation;GO:0071707 immunoglobulin heavy chain V-D-J recombination		Enzymes; FDA approved drug targets:Small molecule drugs; Predicted intracellular proteins; ENZYME proteins:Transferases	Vesicles (Uncertain)	Cytarabine; Iron; dATP; (1S)-1,2,3,4-TETRAHYDRO-BENZO[C]PHENANTHRENE-2,3,4-TRIOL; Ferrous gluconate; Ferrous succinate; Ferrous ascorbate; Ferrous fumarate; Ferrous glycine sulfate		(M5898)HALLMARK DNA REPAIR	0	1	0	0	0	0	0	0	0	0	1	0	0	0	0	0	0	1	0	0
DUSP8	1850	symbol	H. sapiens	1850	H. sapiens	DUSP8	dual specificity phosphatase 8	GO:0035335 peptidyl-tyrosine dephosphorylation;GO:0043409 negative regulation of MAPK cascade;GO:0006470 protein dephosphorylation		Enzymes; ENZYME proteins:Hydrolases; Predicted intracellular proteins	Cytosol (Approved)		(M76)PID P38 ALPHA BETA PATHWAY; (M166)PID ATF2 PATHWAY		0	0	0	0	0	0	0	0	0	0	0	0	0	0	0	0	0	0	0	0
CSRP1	1465	symbol	H. sapiens	1465	H. sapiens	CSRP1	cysteine and glycine rich protein 1	GO:0045214 sarcomere organization;GO:0070527 platelet aggregation;GO:0034109 homotypic cell-cell adhesion		Predicted intracellular proteins		Artenimol		(M5946)HALLMARK COAGULATION; (M5921)HALLMARK COMPLEMENT	0	0	1	1	0	0	0	0	0	1	0	0	0	0	0	1	0	0	0	0
CLDN1	9076	symbol	H. sapiens	9076	H. sapiens	CLDN1	claudin 1	GO:0061772 xenobiotic transport across blood-nerve barrier;GO:1903545 cellular response to butyrate;GO:1903544 response to butyrate		Human disease related genes:Congenital malformations:Congenital malformations of skin; Transporters:Transporter channels and pores; Disease related genes; Potential drug targets			(M72)PID NECTIN PATHWAY		0	0	0	0	1	0	1	0	1	1	1	0	0	1	0	0	0	0	0	0
LOC100507156	100507156	Gene_ID	H. sapiens	100507156	H. sapiens	LOC100507156	uncharacterized LOC100507156								0	0	0	0	0	0	0	0	0	0	0	0	0	0	0	0	0	0	0	0
EDN2	1907	symbol	H. sapiens	1907	H. sapiens	EDN2	endothelin 2	GO:0003058 hormonal regulation of the force of heart contraction;GO:0009932 cell tip growth;GO:0003099 positive regulation of the force of heart contraction by chemical signal		Predicted secreted proteins	Cytosol (Approved)		(M8)PID ENDOTHELIN PATHWAY; (M145)PID P53 DOWNSTREAM PATHWAY	(M5891)HALLMARK HYPOXIA; (M5956)HALLMARK KRAS SIGNALING DN	0	1	0	1	0	0	0	0	0	0	0	0	0	0	0	0	1	1	1	0
BMP4	652	symbol	H. sapiens	652	H. sapiens	BMP4	bone morphogenetic protein 4	GO:0048390 intermediate mesoderm morphogenesis;GO:0048391 intermediate mesoderm formation;GO:0048392 intermediate mesodermal cell differentiation		Human disease related genes:Congenital malformations:Congenital malformations of eye; Cancer-related genes:Candidate cancer biomarkers; Predicted secreted proteins; Disease related genes; Human disease related genes:Congenital malformations:Congenital malformations of face and neck; Predicted intracellular proteins		Calcium	(M181)PID BMP PATHWAY; (M5883)NABA SECRETED FACTORS; (M5885)NABA MATRISOME ASSOCIATED		0	1	1	1	1	1	1	1	1	1	1	0	1	0	1	0	0	0	0	1
PPM1H	57460	symbol	H. sapiens	57460	H. sapiens	PPM1H	protein phosphatase, Mg2+/Mn2+ dependent 1H	GO:0006470 protein dephosphorylation;GO:0016311 dephosphorylation;GO:0006796 phosphate-containing compound metabolic process		Enzymes; ENZYME proteins:Hydrolases; Predicted intracellular proteins	Nucleoplasm (Supported)				0	0	0	0	0	0	0	0	0	0	0	0	0	0	0	0	0	0	0	0
ZNF853	54753	symbol	H. sapiens	54753	H. sapiens	ZNF853	zinc finger protein 853	GO:0006357 regulation of transcription by RNA polymerase II;GO:0006355 regulation of transcription, DNA-templated;GO:1903506 regulation of nucleic acid-templated transcription		Predicted intracellular proteins; Transcription factors:Zinc-coordinating DNA-binding domains	Nucleoli (Approved)				0	0	0	0	0	0	0	0	0	0	0	0	0	0	0	0	0	0	0	0
FAM212B-AS1	100506343	gene_synonym	H. sapiens	100506343	H. sapiens	INKA2-AS1	INKA2 antisense RNA 1								0	0	0	0	0	0	0	0	0	0	0	0	0	0	0	0	0	0	0	0
RAP1GAP2	23108	symbol	H. sapiens	23108	H. sapiens	RAP1GAP2	RAP1 GTPase activating protein 2	GO:0090630 activation of GTPase activity;GO:0008361 regulation of cell size;GO:0043547 positive regulation of GTPase activity		Predicted intracellular proteins	Cytosol;Nuclear membrane (Supported)				0	0	0	0	0	0	0	0	0	0	0	0	0	0	0	0	1	0	0	0
NNAT	4826	symbol	H. sapiens	4826	H. sapiens	NNAT	neuronatin	GO:0009249 protein lipoylation;GO:0032024 positive regulation of insulin secretion;GO:0090277 positive regulation of peptide hormone secretion							0	0	0	0	0	0	0	0	0	0	0	0	0	0	1	0	0	0	0	0
KCTD16	57528	symbol	H. sapiens	57528	H. sapiens	KCTD16	potassium channel tetramerization domain containing 16	GO:0008277 regulation of G protein-coupled receptor signaling pathway;GO:0051260 protein homooligomerization;GO:0051259 protein complex oligomerization		Predicted intracellular proteins					0	0	0	0	0	0	0	0	0	0	0	0	0	0	0	0	0	0	0	0
KLHL13	90293	symbol	H. sapiens	90293	H. sapiens	KLHL13	kelch like family member 13	GO:0032465 regulation of cytokinesis;GO:0051302 regulation of cell division;GO:0051301 cell division		Predicted intracellular proteins	Cytosol (Approved)		(M14)PID AURORA B PATHWAY		0	0	0	0	0	0	0	0	0	0	0	0	0	0	0	0	0	0	0	0
BIRC3	330	symbol	H. sapiens	330	H. sapiens	BIRC3	baculoviral IAP repeat containing 3	GO:0070424 regulation of nucleotide-binding oligomerization domain containing signaling pathway;GO:0060546 negative regulation of necroptotic process;GO:0062099 negative regulation of programmed necrotic cell death		Cancer-related genes:Candidate cancer biomarkers; Disease related genes; Potential drug targets; Enzymes; Predicted intracellular proteins; ENZYME proteins:Transferases	Cytosol;Nucleoplasm (Supported)		(M7997)SA CASPASE CASCADE; (M45)PID CD40 PATHWAY; (M197)PID HIV NEF PATHWAY	(M5902)HALLMARK APOPTOSIS; (M5890)HALLMARK TNFA SIGNALING VIA NFKB; (M5953)HALLMARK KRAS SIGNALING UP	0	0	0	0	0	1	0	0	1	0	0	0	0	0	0	0	0	0	0	0
DCC	1630	symbol	H. sapiens	1630	H. sapiens	DCC	DCC netrin 1 receptor	GO:0033563 dorsal/ventral axon guidance;GO:0021965 spinal cord ventral commissure morphogenesis;GO:2000171 negative regulation of dendrite development		Human disease related genes:Cancers:Cancers of the digestive system; Human disease related genes:Nervous system diseases:Other nervous and sensory system diseases; Cancer-related genes:Candidate cancer biomarkers; Disease related genes; Predicted intracellular proteins	Golgi apparatus (Approved)		(M108)PID NETRIN PATHWAY	(M5951)HALLMARK SPERMATOGENESIS; (M5956)HALLMARK KRAS SIGNALING DN	0	0	0	1	0	0	0	0	1	0	0	0	0	0	1	0	1	0	0	0
SH3BP4	23677	symbol	H. sapiens	23677	H. sapiens	SH3BP4	SH3 domain binding protein 4	GO:0034260 negative regulation of GTPase activity;GO:0061462 protein localization to lysosome;GO:0032007 negative regulation of TOR signaling		Predicted intracellular proteins					0	0	0	0	0	0	0	0	0	0	0	0	0	0	0	0	0	0	0	0
EIF6	3692	symbol	H. sapiens	3692	H. sapiens	EIF6	eukaryotic translation initiation factor 6	GO:1902626 assembly of large subunit precursor of preribosome;GO:0042256 mature ribosome assembly;GO:0000054 ribosomal subunit export from nucleus		Predicted intracellular proteins	Nucleoplasm (Supported)	Copper			0	0	0	0	0	0	0	0	0	0	0	0	0	0	0	0	0	0	0	0
MAP3K5	4217	symbol	H. sapiens	4217	H. sapiens	MAP3K5	mitogen-activated protein kinase kinase kinase 5	GO:0072577 endothelial cell apoptotic process;GO:0038066 p38MAPK cascade;GO:0010663 positive regulation of striated muscle cell apoptotic process	STE Ser/Thr protein kinase family	Enzymes; Kinases:STE Ser/Thr protein kinases; Predicted intracellular proteins; ENZYME proteins:Transferases	Cytosol (Supported)		(M20)PID P38 MKK3 6PATHWAY; (M197)PID HIV NEF PATHWAY; (M249)PID PI3KCI AKT PATHWAY		1	0	0	0	0	0	0	0	0	0	0	1	1	0	1	0	0	0	0	0
SAMD12	401474	symbol	H. sapiens	401474	H. sapiens	SAMD12	sterile alpha motif domain containing 12	GO:0007169 transmembrane receptor protein tyrosine kinase signaling pathway;GO:0007167 enzyme linked receptor protein signaling pathway;GO:0007166 cell surface receptor signaling pathway		Human disease related genes:Nervous system diseases:Epilepsy; Predicted intracellular proteins; Disease related genes	Cytosol;Golgi apparatus (Approved)				0	0	0	0	0	0	1	0	0	0	0	0	0	0	0	0	0	0	0	0
FAM96B	51647	gene_synonym	H. sapiens	51647	H. sapiens	CIAO2B	cytosolic iron-sulfur assembly component 2B	GO:0106035 protein maturation by [4Fe-4S] cluster transfer;GO:0097428 protein maturation by iron-sulfur cluster transfer;GO:0016226 iron-sulfur cluster assembly		Predicted intracellular proteins	Cytosol;Nucleoplasm (Supported)				0	0	0	0	0	0	0	0	0	0	0	0	0	0	0	0	0	0	0	0
FAM212B	55924	gene_synonym	H. sapiens	55924	H. sapiens	INKA2	inka box actin regulator 2	GO:0043086 negative regulation of catalytic activity;GO:0044092 negative regulation of molecular function;GO:0050790 regulation of catalytic activity		Predicted intracellular proteins	Nucleoplasm (Supported); Additional: Nucleoli;Vesicles				0	0	0	0	0	0	0	0	0	0	0	0	0	0	0	0	0	0	0	0
LINC00670	284034	symbol	H. sapiens	284034	H. sapiens	LINC00670	long intergenic non-protein coding RNA 670								0	0	0	0	0	0	0	0	0	0	0	0	0	0	0	0	0	0	0	0
ANK1	286	symbol	H. sapiens	286	H. sapiens	ANK1	ankyrin 1	GO:0035090 maintenance of apical/basal cell polarity;GO:0045199 maintenance of epithelial cell apical/basal polarity;GO:0030011 maintenance of cell polarity		Transporters:Accessory Factors Involved in Transport; Human disease related genes:Cardiovascular diseases:Hematologic diseases; Disease related genes; Potential drug targets; Predicted intracellular proteins				(M5945)HALLMARK HEME METABOLISM	0	0	0	1	0	0	0	0	0	0	0	0	0	0	0	0	0	0	0	0
LHX2	9355	symbol	H. sapiens	9355	H. sapiens	LHX2	LIM homeobox 2	GO:0035090 maintenance of apical/basal cell polarity;GO:0045199 maintenance of epithelial cell apical/basal polarity;GO:0021978 telencephalon regionalization		Transcription factors:Helix-turn-helix domains; Predicted intracellular proteins	Nucleoplasm (Approved)			(M5941)HALLMARK UV RESPONSE UP	0	1	0	1	1	0	0	1	0	1	1	0	0	0	1	0	0	0	0	1
MT1F	4494	symbol	H. sapiens	4494	H. sapiens	MT1F	metallothionein 1F	GO:0010273 detoxification of copper ion;GO:1990169 stress response to copper ion;GO:0061687 detoxification of inorganic compound		Predicted intracellular proteins					0	0	0	0	0	0	0	0	0	0	0	0	0	0	0	0	0	0	0	0
ADAMTS15	170689	symbol	H. sapiens	170689	H. sapiens	ADAMTS15	ADAM metallopeptidase with thrombospondin type 1 motif 15	GO:0007520 myoblast fusion;GO:0000768 syncytium formation by plasma membrane fusion;GO:0140253 cell-cell fusion		Predicted secreted proteins	Cytosol (Approved)		(M3468)NABA ECM REGULATORS; (M5885)NABA MATRISOME ASSOCIATED; (M5889)NABA MATRISOME		0	0	1	0	0	0	0	0	0	0	0	0	0	0	0	0	0	0	0	0
AFAP1	60312	symbol	H. sapiens	60312	H. sapiens	AFAP1	actin filament associated protein 1	GO:0051493 regulation of cytoskeleton organization;GO:0033043 regulation of organelle organization;GO:0051128 regulation of cellular component organization		Predicted intracellular proteins	Actin filaments;Cytosol (Supported); Additional: Focal adhesion sites				0	0	0	0	0	0	0	0	0	0	0	0	0	0	0	0	1	0	0	0
KCNAB3	9196	symbol	H. sapiens	9196	H. sapiens	KCNAB3	potassium voltage-gated channel subfamily A regulatory beta subunit 3	GO:1901379 regulation of potassium ion transmembrane transport;GO:0043266 regulation of potassium ion transport;GO:0071805 potassium ion transmembrane transport		Predicted intracellular proteins	Mitochondria (Approved)				0	0	0	0	0	0	0	0	0	0	0	0	0	0	0	0	0	0	0	0
CGA	1081	symbol	H. sapiens	1081	H. sapiens	CGA	glycoprotein hormones, alpha polypeptide	GO:0046884 follicle-stimulating hormone secretion;GO:0032275 luteinizing hormone secretion;GO:0032274 gonadotropin secretion		Predicted secreted proteins; Cancer-related genes:Candidate cancer biomarkers			(M115)PID REG GR PATHWAY		0	0	0	0	0	0	0	0	0	0	0	0	0	0	0	0	0	0	0	0
MSX2	4488	symbol	H. sapiens	4488	H. sapiens	MSX2	msh homeobox 2	GO:0060364 frontal suture morphogenesis;GO:2001055 positive regulation of mesenchymal cell apoptotic process;GO:0035880 embryonic nail plate morphogenesis		Transcription factors:Helix-turn-helix domains; Human disease related genes:Congenital malformations:Congenital malformations of the musculoskeletal system; Human disease related genes:Congenital malformations:Other congenital malformations; Disease related genes; Predicted intracellular proteins	Nuclear speckles (Supported)				0	1	0	0	1	0	1	1	0	1	0	0	0	0	0	0	0	0	0	0
TM7SF2	7108	symbol	H. sapiens	7108	H. sapiens	TM7SF2	transmembrane 7 superfamily member 2	GO:0006695 cholesterol biosynthetic process;GO:1902653 secondary alcohol biosynthetic process;GO:0016126 sterol biosynthetic process		Enzymes; Predicted intracellular proteins; ENZYME proteins:Oxidoreductases	Endoplasmic reticulum (Supported); Additional: Vesicles			(M5892)HALLMARK CHOLESTEROL HOMEOSTASIS; (M5924)HALLMARK MTORC1 SIGNALING	0	0	0	0	0	0	0	0	0	0	0	0	0	0	0	0	0	0	0	0
DPH1	1801	symbol	H. sapiens	1801	H. sapiens	DPH1	diphthamide biosynthesis 1	GO:0017182 peptidyl-diphthamide metabolic process;GO:0017183 peptidyl-diphthamide biosynthetic process from peptidyl-histidine;GO:1900247 regulation of cytoplasmic translational elongation		Human disease related genes:Congenital malformations:Other congenital malformations; Disease related genes; Potential drug targets; Enzymes; Predicted intracellular proteins; ENZYME proteins:Transferases	Nucleoplasm (Approved); Additional: Cell Junctions				0	0	0	0	0	0	0	0	0	0	0	0	0	0	0	0	0	0	0	0
TMEM25	84866	symbol	H. sapiens	84866	H. sapiens	TMEM25	transmembrane protein 25	GO:0090394 negative regulation of excitatory postsynaptic potential;GO:0098815 modulation of excitatory postsynaptic potential;GO:0050805 negative regulation of synaptic transmission		Transporters:Accessory Factors Involved in Transport; Predicted intracellular proteins	Golgi apparatus;Vesicles (Approved)				0	0	0	0	0	0	0	0	0	0	0	0	0	0	0	0	0	0	1	0
FAM46B	115572	gene_synonym	H. sapiens	115572	H. sapiens	TENT5B	terminal nucleotidyltransferase 5B	GO:0048255 mRNA stabilization;GO:0043489 RNA stabilization;GO:1902373 negative regulation of mRNA catabolic process		Predicted intracellular proteins					0	0	0	0	0	0	0	0	0	0	0	0	0	0	0	0	0	0	0	0
BRSK1	84446	symbol	H. sapiens	84446	H. sapiens	BRSK1	BR serine/threonine kinase 1	GO:0090176 microtubule cytoskeleton organization involved in establishment of planar polarity;GO:2000807 regulation of synaptic vesicle clustering;GO:0001736 establishment of planar polarity	CAMK Ser/Thr protein kinase family	Enzymes; Kinases:CAMK Ser/Thr protein kinases; Predicted intracellular proteins; ENZYME proteins:Transferases	Nucleoplasm (Supported); Additional: Cell Junctions		(M87)PID LKB1 PATHWAY		0	1	0	1	0	0	0	0	0	0	0	0	0	0	1	0	0	0	0	0
NTN4	59277	symbol	H. sapiens	59277	H. sapiens	NTN4	netrin 4	GO:0060668 regulation of branching involved in salivary gland morphogenesis by extracellular matrix-epithelial cell signaling;GO:0035426 extracellular matrix-cell signaling;GO:0060693 regulation of branching involved in salivary gland morphogenesis		Predicted intracellular proteins; Predicted secreted proteins; Cancer-related genes:Mutated cancer genes			(M5887)NABA BASEMENT MEMBRANES; (M3008)NABA ECM GLYCOPROTEINS; (M5884)NABA CORE MATRISOME		0	0	0	1	0	0	0	0	0	0	1	0	0	0	0	0	0	0	0	0
AMOTL2	51421	symbol	H. sapiens	51421	H. sapiens	AMOTL2	angiomotin like 2	GO:0003365 establishment of cell polarity involved in ameboidal cell migration;GO:0035329 hippo signaling;GO:0030010 establishment of cell polarity		Predicted intracellular proteins	Cell Junctions (Approved)				0	1	0	0	0	1	0	0	1	0	0	0	0	0	0	1	0	1	0	0
CDK7	1022	symbol	H. sapiens	1022	H. sapiens	CDK7	cyclin dependent kinase 7	GO:0070816 phosphorylation of RNA polymerase II C-terminal domain;GO:0042795 snRNA transcription by RNA polymerase II;GO:0009301 snRNA transcription	CMGC Ser/Thr protein kinase family	Cancer-related genes:Candidate cancer biomarkers; Kinases:CMGC Ser/Thr protein kinases; Enzymes; Predicted intracellular proteins; ENZYME proteins:Transferases	Nucleoplasm (Supported); Additional: Cytosol;Nucleoli fibrillar center;Plasma membrane	Phosphonothreonine; Alvocidib; SNS-032; Seliciclib	(M10154)SA G2 AND M PHASES; (M207)PID RETINOIC ACID PATHWAY	(M5949)HALLMARK PEROXISOME	1	0	0	0	0	0	0	0	0	0	0	0	1	0	0	0	0	0	0	0
ANKS1A	23294	symbol	H. sapiens	23294	H. sapiens	ANKS1A	ankyrin repeat and sterile alpha motif domain containing 1A	GO:1901187 regulation of ephrin receptor signaling pathway;GO:0016322 neuron remodeling;GO:0006929 substrate-dependent cell migration		Predicted intracellular proteins	Nucleoplasm (Approved); Additional: Cytosol				0	0	0	0	0	0	1	0	0	0	0	0	0	0	0	0	0	0	0	0
DLG3	1741	symbol	H. sapiens	1741	H. sapiens	DLG3	discs large MAGUK scaffold protein 3	GO:0001736 establishment of planar polarity;GO:0007164 establishment of tissue polarity;GO:0099072 regulation of postsynaptic membrane neurotransmitter receptor levels		Predicted intracellular proteins; Human disease related genes:Other diseases:Mental and behavioural disorders; Disease related genes	Nucleoli;Nucleoplasm (Approved)				0	1	0	1	0	1	0	0	1	0	0	0	1	0	0	0	0	0	0	0
EIF3F	8665	symbol	H. sapiens	8665	H. sapiens	EIF3F	eukaryotic translation initiation factor 3 subunit F	GO:0075522 IRES-dependent viral translational initiation;GO:0019081 viral translation;GO:0019080 viral gene expression		Human disease related genes:Other diseases:Mental and behavioural disorders; ENZYME proteins:Hydrolases; Disease related genes; Potential drug targets; Enzymes; Predicted intracellular proteins		Quercetin			0	0	0	0	0	0	0	0	0	0	0	0	0	0	0	0	0	0	0	0
JAG1	182	symbol	H. sapiens	182	H. sapiens	JAG1	jagged canonical Notch ligand 1	GO:0061444 endocardial cushion cell development;GO:0061443 endocardial cushion cell differentiation;GO:0061073 ciliary body morphogenesis		CD markers; Human disease related genes:Congenital malformations:Congenital malformations of the circulatory system; Human disease related genes:Congenital malformations:Congenital malformations of the digestive system; Disease related genes; Predicted intracellular proteins	Golgi apparatus;Plasma membrane (Approved)		(M256)PID TAP63 PATHWAY; (M17)PID NOTCH PATHWAY	(M5903)HALLMARK NOTCH SIGNALING; (M5944)HALLMARK ANGIOGENESIS; (M5895)HALLMARK WNT BETA CATENIN SIGNALING	0	1	1	0	1	1	0	0	1	1	0	0	0	0	0	0	0	0	0	0
NDUFB8	4714	symbol	H. sapiens	4714	H. sapiens	NDUFB8	NADH:ubiquinone oxidoreductase subunit B8	GO:0006120 mitochondrial electron transport, NADH to ubiquinone;GO:0010257 NADH dehydrogenase complex assembly;GO:0032981 mitochondrial respiratory chain complex I assembly		Disease related genes; Human disease related genes:Congenital disorders of metabolism:Mitochondrial diseases	Mitochondria (Enhanced)	NADH		(M5936)HALLMARK OXIDATIVE PHOSPHORYLATION	0	0	0	0	0	0	0	0	0	0	0	1	0	0	0	0	0	0	0	0
LIMS2	55679	symbol	H. sapiens	55679	H. sapiens	LIMS2	LIM zinc finger domain containing 2	GO:2000346 negative regulation of hepatocyte proliferation;GO:2001046 positive regulation of integrin-mediated signaling pathway;GO:2000345 regulation of hepatocyte proliferation		Predicted intracellular proteins; Human disease related genes:Musculoskeletal diseases:Muscular diseases; Disease related genes	Focal adhesion sites (Supported)		(M71)PID ILK PATHWAY		0	0	0	0	0	0	0	0	0	0	1	0	0	0	1	0	0	0	0	0
NXN	64359	symbol	H. sapiens	64359	H. sapiens	NXN	nucleoredoxin	GO:0031397 negative regulation of protein ubiquitination;GO:0098869 cellular oxidant detoxification;GO:1903321 negative regulation of protein modification by small protein conjugation or removal		ENZYME proteins:Oxidoreductases; Disease related genes; Potential drug targets; Enzymes; Predicted intracellular proteins	Cytosol (Approved)				0	1	0	0	0	0	0	0	1	0	0	0	0	0	0	0	0	1	0	0
PICK1	9463	symbol	H. sapiens	9463	H. sapiens	PICK1	protein interacting with PRKCA 1	GO:0034316 negative regulation of Arp2/3 complex-mediated actin nucleation;GO:0051126 negative regulation of actin nucleation;GO:0043045 DNA methylation involved in embryo development		Predicted intracellular proteins	Cytosol (Supported)			(M5909)HALLMARK MYOGENESIS	0	0	0	0	0	0	0	0	0	0	0	0	0	1	0	0	1	0	0	0
CTNND2	1501	symbol	H. sapiens	1501	H. sapiens	CTNND2	catenin delta 2	GO:0060997 dendritic spine morphogenesis;GO:0060996 dendritic spine development;GO:0097061 dendritic spine organization		Human disease related genes:Other congenital disorders:Chromosomal abnormalities; Predicted intracellular proteins; Disease related genes	Cell Junctions;Nucleoplasm (Approved); Additional: Cytosol				0	0	0	1	0	0	0	1	1	0	0	0	0	0	0	0	0	0	0	0
USP11	8237	symbol	H. sapiens	8237	H. sapiens	USP11	ubiquitin specific peptidase 11	GO:0016579 protein deubiquitination;GO:0070646 protein modification by small protein removal;GO:0006511 ubiquitin-dependent protein catabolic process		Enzymes; ENZYME proteins:Hydrolases; Predicted intracellular proteins; Peptidases:Cysteine-type peptidases	Nucleoplasm (Supported); Additional: Cytosol			(M5946)HALLMARK COAGULATION; (M5898)HALLMARK DNA REPAIR	0	0	0	0	0	0	0	0	0	0	0	0	0	0	0	0	0	0	0	0
TNNC1	7134	symbol	H. sapiens	7134	H. sapiens	TNNC1	troponin C1, slow skeletal and cardiac type	GO:0002086 diaphragm contraction;GO:0032972 regulation of muscle filament sliding speed;GO:0003011 involuntary skeletal muscle contraction		Predicted intracellular proteins; FDA approved drug targets:Small molecule drugs; Human disease related genes:Cardiovascular diseases:Cardiac diseases; Disease related genes	Actin filaments;Mitochondria;Nucleoplasm (Approved)	Trifluoperazine; Levosimendan; Felodipine; Bepridil; Calcium; Aluminium monostearate; 5-[1-(3,4-Dimethoxy-Benzoyl)-1,2,3,4-Tetrahydro-Quinolin-6-Yl]-6-Methyl-3,6-Dihydro-[1,3,4]Thiadiazin-2-One; N-(6-Aminohexyl)-5-Chloro-1-Naphthalenesulfonamide		(M5907)HALLMARK ESTROGEN RESPONSE LATE; (M5909)HALLMARK MYOGENESIS	0	1	1	0	0	0	0	0	0	1	0	0	0	0	0	0	1	0	1	0
KCNMB1	3779	symbol	H. sapiens	3779	H. sapiens	KCNMB1	potassium calcium-activated channel subfamily M regulatory beta subunit 1	GO:1903412 response to bile acid;GO:1903413 cellular response to bile acid;GO:0071361 cellular response to ethanol		Transporters:Accessory Factors Involved in Transport; FDA approved drug targets:Small molecule drugs				(M5956)HALLMARK KRAS SIGNALING DN	0	0	0	0	0	0	0	0	0	0	0	0	0	0	0	0	1	0	0	0
NDUFB9	4715	symbol	H. sapiens	4715	H. sapiens	NDUFB9	NADH:ubiquinone oxidoreductase subunit B9	GO:0006120 mitochondrial electron transport, NADH to ubiquinone;GO:0010257 NADH dehydrogenase complex assembly;GO:0032981 mitochondrial respiratory chain complex I assembly		Predicted intracellular proteins; Disease related genes; Human disease related genes:Congenital disorders of metabolism:Mitochondrial diseases	Mitochondria (Supported)	NADH			0	0	0	0	0	0	0	0	0	0	0	1	0	0	0	0	0	0	0	0
ADGRG6	57211	symbol	H. sapiens	57211	H. sapiens	ADGRG6	adhesion G protein-coupled receptor G6	GO:0060347 heart trabecula formation;GO:0060343 trabecula formation;GO:0019933 cAMP-mediated signaling		G-protein coupled receptors:Family 2 (B) receptors; Human disease related genes:Congenital malformations:Congenital malformations of the musculoskeletal system; Disease related genes; Potential drug targets; G-protein coupled receptors:GPCRs excl olfactory receptors; Predicted intracellular proteins					0	0	0	1	0	0	0	0	0	1	0	0	0	1	0	0	0	0	0	0
ERBB3	2065	symbol	H. sapiens	2065	H. sapiens	ERBB3	erb-b2 receptor tyrosine kinase 3	GO:0055025 positive regulation of cardiac muscle tissue development;GO:0055024 regulation of cardiac muscle tissue development;GO:0070886 positive regulation of calcineurin-NFAT signaling cascade	Tyr protein kinase family	Cancer-related genes:Mutated cancer genes; Cancer-related genes:Candidate cancer biomarkers; Predicted secreted proteins; Human disease related genes:Congenital malformations:Congenital malformations of the musculoskeletal system; Kinases:Tyr protein kinases; Disease related genes; Potential drug targets; Enzymes; Human disease related genes:Endocrine and metabolic diseases:Diabetes; Predicted in…	Plasma membrane (Supported); Additional: Actin filaments	Tucatinib	(M201)PID ERBB NETWORK PATHWAY; (M175)PID ERBB2 ERBB3 PATHWAY; (M239)PID A6B1 A6B4 INTEGRIN PATHWAY	(M5902)HALLMARK APOPTOSIS; (M5909)HALLMARK MYOGENESIS	0	0	0	0	0	0	1	0	0	1	0	0	1	1	1	0	0	0	0	0
SLC2A1	6513	symbol	H. sapiens	6513	H. sapiens	SLC2A1	solute carrier family 2 member 1	GO:0015911 long-chain fatty acid import across plasma membrane;GO:1904016 response to Thyroglobulin triiodothyronine;GO:0098708 glucose import across plasma membrane		Human disease related genes:Nervous system diseases:Epilepsy; Human disease related genes:Nervous system diseases:Other nervous and sensory system diseases; Cancer-related genes:Candidate cancer biomarkers; Human disease related genes:Cardiovascular diseases:Hematologic diseases; Disease related genes; Potential drug targets; Transporters:Electrochemical Potential-driven transporters; Predicted i…	Plasma membrane (Enhanced)	Resveratrol; Carboxymethylcellulose	(M44)PID HIF2PATHWAY; (M255)PID HIF1 TFPATHWAY; (M66)PID MYC ACTIV PATHWAY	(M5923)HALLMARK PI3K AKT MTOR SIGNALING; (M5891)HALLMARK HYPOXIA; (M5906)HALLMARK ESTROGEN RESPONSE EARLY	1	0	0	0	0	0	0	0	1	0	0	0	0	0	1	0	0	0	0	0
HAAO	23498	symbol	H. sapiens	23498	H. sapiens	HAAO	3-hydroxyanthranilate 3,4-dioxygenase	GO:0019805 quinolinate biosynthetic process;GO:0043420 anthranilate metabolic process;GO:0046874 quinolinate metabolic process		ENZYME proteins:Oxidoreductases; Human disease related genes:Congenital disorders of metabolism:Congenital disorders of amino acid metabolism; Disease related genes; Potential drug targets; Enzymes; Predicted intracellular proteins					0	0	0	0	0	0	0	0	0	0	0	0	0	0	0	0	0	0	0	0
STK33	65975	symbol	H. sapiens	65975	H. sapiens	STK33	serine/threonine kinase 33	GO:0044773 mitotic DNA damage checkpoint signaling;GO:0044774 mitotic DNA integrity checkpoint signaling;GO:0000077 DNA damage checkpoint signaling	CAMK Ser/Thr protein kinase family	Enzymes; Kinases:CAMK Ser/Thr protein kinases; Predicted intracellular proteins; ENZYME proteins:Transferases	Nucleoplasm (Approved); Additional: Cytosol;Nucleoli	Fostamatinib			0	0	0	0	0	0	0	0	0	0	0	0	0	0	0	0	0	0	0	0
TMEM2	23670	gene_synonym	H. sapiens	23670	H. sapiens	CEMIP2	cell migration inducing hyaluronidase 2	GO:0030214 hyaluronan catabolic process;GO:0030212 hyaluronan metabolic process;GO:0006027 glycosaminoglycan catabolic process		Enzymes; ENZYME proteins:Hydrolases; Predicted intracellular proteins	Plasma membrane (Supported); Additional: Cytosol;Vesicles				0	1	0	0	0	0	0	0	0	0	0	0	0	0	0	0	0	0	0	0
ZFHX2	85446	symbol	H. sapiens	85446	H. sapiens	ZFHX2	zinc finger homeobox 2	GO:0051930 regulation of sensory perception of pain;GO:0051931 regulation of sensory perception;GO:0030534 adult behavior		Transcription factors:Helix-turn-helix domains; Predicted intracellular proteins; Disease related genes; Human disease related genes:Nervous system diseases:Other nervous and sensory system diseases	Nucleoli fibrillar center (Approved); Additional: Nucleoplasm				0	0	0	0	0	0	0	0	0	0	0	0	0	0	1	0	0	0	1	0
SIK1	150094	symbol	H. sapiens	150094	H. sapiens	SIK1	salt inducible kinase 1	GO:0010868 negative regulation of triglyceride biosynthetic process;GO:0032792 negative regulation of CREB transcription factor activity;GO:2000210 positive regulation of anoikis	CAMK Ser/Thr protein kinase family	Human disease related genes:Nervous system diseases:Epilepsy; Kinases:CAMK Ser/Thr protein kinases; Disease related genes; Potential drug targets; Enzymes; Predicted intracellular proteins; ENZYME proteins:Transferases	Nucleoplasm (Approved); Additional: Vesicles	Dabrafenib; Fostamatinib	(M87)PID LKB1 PATHWAY	(M5890)HALLMARK TNFA SIGNALING VIA NFKB	0	0	1	0	0	0	0	0	0	1	0	0	0	0	0	0	0	0	0	0
MYCT1	80177	symbol	H. sapiens	80177	H. sapiens	MYCT1	MYC target 1	GO:0061484 hematopoietic stem cell homeostasis;GO:0048872 homeostasis of number of cells;GO:0042592 homeostatic process		Predicted intracellular proteins	Nucleoplasm (Approved); Additional: Vesicles		(M66)PID MYC ACTIV PATHWAY		0	0	0	0	0	0	0	0	0	0	1	0	0	0	0	0	0	0	0	0
GPR183	1880	symbol	H. sapiens	1880	H. sapiens	GPR183	G protein-coupled receptor 183	GO:0036145 dendritic cell homeostasis;GO:2000458 regulation of astrocyte chemotaxis;GO:0061470 T follicular helper cell differentiation		G-protein coupled receptors:GPCRs excl olfactory receptors				(M5890)HALLMARK TNFA SIGNALING VIA NFKB; (M5932)HALLMARK INFLAMMATORY RESPONSE	0	0	0	1	0	0	0	0	0	0	1	0	0	0	0	0	0	0	0	0
PLAU	5328	symbol	H. sapiens	5328	H. sapiens	PLAU	plasminogen activator, urokinase	GO:2000097 regulation of smooth muscle cell-matrix adhesion;GO:0014909 smooth muscle cell migration;GO:0031639 plasminogen activation		Cancer-related genes:Candidate cancer biomarkers; ENZYME proteins:Hydrolases; Predicted secreted proteins; Disease related genes; Potential drug targets; Enzymes; Predicted intracellular proteins; Peptidases:Serine-type peptidases	Golgi apparatus;Vesicles (Uncertain)	Amiloride; 2-{2-hydroxy-[1,1'-biphenyl]-3-yl}-1H-1,3-benzodiazole-5-carboximidamide; 2-(2-Hydroxy-5-Methoxy-Phenyl)-1h-Benzoimidazole-5-Carboxamidine; 6-(N-Phenylcarbamyl)-2-Naphthalenecarboxamidine; 2-(2-hydroxy-phenyl)-3H-benzoimidazole-5-carboxamidine; 6-[N-(4-(Aminomethyl)Phenyl)Carbamyl]-2-Naphthalenecarboxamidine; 6-[N-(1-Isopropyl-3,4-Dihydro-7-Isoquinolinyl)Carbamyl]-2-Naphthalenecarboxam…	(M212)PID INTEGRIN5 PATHWAY; (M169)PID INTEGRIN2 PATHWAY; (M63)PID AVB3 OPN PATHWAY	(M5946)HALLMARK COAGULATION; (M5890)HALLMARK TNFA SIGNALING VIA NFKB; (M5953)HALLMARK KRAS SIGNALING UP	1	0	0	1	0	0	0	0	1	0	0	0	0	0	0	0	0	0	0	0
FGF5	2250	symbol	H. sapiens	2250	H. sapiens	FGF5	fibroblast growth factor 5	GO:0023019 signal transduction involved in regulation of gene expression;GO:0008543 fibroblast growth factor receptor signaling pathway;GO:0044344 cellular response to fibroblast growth factor stimulus		RAS pathway related proteins; Human disease related genes:Skin diseases:Skin and soft tissue diseases; Predicted secreted proteins; Disease related genes	Nucleoli fibrillar center (Supported); Additional: Cytosol;Nucleoplasm		(M5883)NABA SECRETED FACTORS; (M5885)NABA MATRISOME ASSOCIATED; (M5889)NABA MATRISOME		1	0	0	0	0	0	1	0	1	0	0	0	1	1	0	0	0	0	0	0
KCNE4	23704	symbol	H. sapiens	23704	H. sapiens	KCNE4	potassium voltage-gated channel subfamily E regulatory subunit 4	GO:0098915 membrane repolarization during ventricular cardiac muscle cell action potential;GO:0099625 ventricular cardiac muscle cell membrane repolarization;GO:1902260 negative regulation of delayed rectifier potassium channel activity			Microtubules (Approved); Additional: Nuclear bodies				0	0	0	0	0	0	0	0	0	0	0	0	0	0	0	1	0	0	1	0
SLC16A12	387700	symbol	H. sapiens	387700	H. sapiens	SLC16A12	solute carrier family 16 member 12	GO:0015881 creatine transmembrane transport;GO:0072337 modified amino acid transport;GO:0010232 vascular transport		Human disease related genes:Nervous system diseases:Eye disease; Disease related genes; Potential drug targets; Transporters:Electrochemical Potential-driven transporters; Predicted intracellular proteins	Mitochondria (Approved)				0	0	0	0	0	0	0	0	0	0	0	0	0	0	0	0	0	0	0	0
CENPV	201161	symbol	H. sapiens	201161	H. sapiens	CENPV	centromere protein V	GO:0031508 pericentric heterochromatin assembly;GO:0140462 pericentric heterochromatin organization;GO:0031048 heterochromatin assembly by small RNA		Predicted intracellular proteins	Nucleoplasm (Approved); Additional: Cytosol;Midbody				0	0	0	0	0	0	0	0	0	0	0	0	0	0	0	0	0	1	0	0
PPP1R14A	94274	symbol	H. sapiens	94274	H. sapiens	PPP1R14A	protein phosphatase 1 regulatory inhibitor subunit 14A	GO:0043086 negative regulation of catalytic activity;GO:0044092 negative regulation of molecular function;GO:0042325 regulation of phosphorylation		Predicted intracellular proteins	Nucleoplasm (Supported); Additional: Nuclear bodies		(M71)PID ILK PATHWAY		0	0	0	0	0	1	0	0	0	0	0	0	0	0	0	0	0	0	0	0
RAB24	53917	symbol	H. sapiens	53917	H. sapiens	RAB24	RAB24, member RAS oncogene family	GO:0006914 autophagy;GO:0061919 process utilizing autophagic mechanism;GO:0006886 intracellular protein transport		Predicted intracellular proteins	Focal adhesion sites (Uncertain)				0	0	0	0	0	0	0	0	0	0	0	0	0	0	0	0	0	0	0	0
PDGFA	5154	symbol	H. sapiens	5154	H. sapiens	PDGFA	platelet derived growth factor subunit A	GO:0060683 regulation of branching involved in salivary gland morphogenesis by epithelial-mesenchymal signaling;GO:0010512 negative regulation of phosphatidylinositol biosynthetic process;GO:1990401 embryonic lung development		Candidate cardiovascular disease genes; Human disease related genes:Cancers:Cancers of eye, brain, and central nervous system; Cancer-related genes:Candidate cancer biomarkers; Predicted secreted proteins; Human disease related genes:Cancers:Cancers of the lung and pleura; RAS pathway related proteins; Predicted intracellular proteins	Golgi apparatus (Approved)		(M144)PID CERAMIDE PATHWAY; (M5883)NABA SECRETED FACTORS; (M5885)NABA MATRISOME ASSOCIATED	(M5944)HALLMARK ANGIOGENESIS; (M5939)HALLMARK P53 PATHWAY	1	1	0	1	1	0	1	0	1	0	1	0	1	0	0	1	1	0	0	0
RPAIN	84268	symbol	H. sapiens	84268	H. sapiens	RPAIN	RPA interacting protein	GO:0006606 protein import into nucleus;GO:0051170 import into nucleus;GO:0006261 DNA-dependent DNA replication		Predicted intracellular proteins	Nucleoli fibrillar center (Approved); Additional: Nucleoplasm				0	0	0	0	0	0	0	0	0	0	0	0	0	0	0	0	0	0	0	0
PLEKHG2	64857	symbol	H. sapiens	64857	H. sapiens	PLEKHG2	pleckstrin homology and RhoGEF domain containing G2	GO:0030833 regulation of actin filament polymerization;GO:0008064 regulation of actin polymerization or depolymerization;GO:0030832 regulation of actin filament length		Predicted intracellular proteins; Human disease related genes:Nervous system diseases:Neurodegenerative diseases; Disease related genes	Nucleoplasm (Approved); Additional: Cytosol			(M5893)HALLMARK MITOTIC SPINDLE	0	0	0	0	0	0	0	0	0	0	0	0	0	0	0	0	1	0	0	0
RTKN2	219790	symbol	H. sapiens	219790	H. sapiens	RTKN2	rhotekin 2	GO:1901224 positive regulation of NIK/NF-kappaB signaling;GO:2001243 negative regulation of intrinsic apoptotic signaling pathway;GO:1901222 regulation of NIK/NF-kappaB signaling		Predicted intracellular proteins	Nucleoplasm (Approved); Additional: Mitochondria				0	0	0	0	0	0	0	0	0	0	0	0	0	0	0	0	0	0	0	0
FDFT1	2222	symbol	H. sapiens	2222	H. sapiens	FDFT1	farnesyl-diphosphate farnesyltransferase 1	GO:0045338 farnesyl diphosphate metabolic process;GO:0006695 cholesterol biosynthetic process;GO:1902653 secondary alcohol biosynthetic process		Disease related genes; Potential drug targets; Enzymes; Predicted intracellular proteins; ENZYME proteins:Transferases	Endoplasmic reticulum (Supported)	TAK-475		(M5892)HALLMARK CHOLESTEROL HOMEOSTASIS; (M5906)HALLMARK ESTROGEN RESPONSE EARLY; (M5907)HALLMARK ESTROGEN RESPONSE LATE	0	0	0	0	0	0	0	0	0	0	0	0	0	0	0	0	0	0	0	0
HAS3	3038	symbol	H. sapiens	3038	H. sapiens	HAS3	hyaluronan synthase 3	GO:1900104 regulation of hyaluranon cable assembly;GO:1900106 positive regulation of hyaluranon cable assembly;GO:0045226 extracellular polysaccharide biosynthetic process		Enzymes; ENZYME proteins:Transferases	Microtubules (Approved)				0	0	0	0	0	0	0	0	0	0	0	0	0	0	0	0	0	0	0	0
RABEPK	10244	symbol	H. sapiens	10244	H. sapiens	RABEPK	Rab9 effector protein with kelch motifs	GO:0006904 vesicle docking involved in exocytosis;GO:0048278 vesicle docking;GO:0140029 exocytic process		Predicted intracellular proteins	Plasma membrane (Uncertain)			(M5928)HALLMARK MYC TARGETS V2	0	0	0	0	0	0	0	0	0	0	0	0	0	0	0	0	0	0	0	0
HID1	283987	symbol	H. sapiens	283987	H. sapiens	HID1	HID1 domain containing			Predicted intracellular proteins	Cytosol;Golgi apparatus (Supported)				0	0	0	0	0	0	0	0	0	0	0	0	0	0	0	0	0	0	0	0
TLL1	7092	symbol	H. sapiens	7092	H. sapiens	TLL1	tolloid like 1	GO:0030199 collagen fibril organization;GO:0030198 extracellular matrix organization;GO:0043062 extracellular structure organization		Human disease related genes:Congenital malformations:Congenital malformations of the circulatory system; Predicted secreted proteins; Predicted intracellular proteins; Disease related genes	Vesicles (Approved)		(M3468)NABA ECM REGULATORS; (M5885)NABA MATRISOME ASSOCIATED; (M5889)NABA MATRISOME		0	0	0	0	0	0	0	0	0	0	0	0	0	0	0	1	0	0	0	0
ARHGEF16	27237	symbol	H. sapiens	27237	H. sapiens	ARHGEF16	Rho guanine nucleotide exchange factor 16	GO:1903078 positive regulation of protein localization to plasma membrane;GO:1904377 positive regulation of protein localization to cell periphery;GO:1903076 regulation of protein localization to plasma membrane		Predicted intracellular proteins					0	0	0	1	0	0	0	0	0	0	0	0	0	0	0	0	0	0	0	0
SLC25A29	123096	symbol	H. sapiens	123096	H. sapiens	SLC25A29	solute carrier family 25 member 29	GO:1990575 mitochondrial L-ornithine transmembrane transport;GO:0006844 acyl carnitine transport;GO:1903826 L-arginine transmembrane transport		Transporters:Electrochemical Potential-driven transporters; Predicted intracellular proteins		Levocarnitine			0	0	0	0	0	0	0	0	0	0	0	0	0	0	0	0	0	0	0	0
ZYG11A	440590	symbol	H. sapiens	440590	H. sapiens	ZYG11A	zyg-11 family member A, cell cycle regulator			Predicted intracellular proteins	Nucleoplasm (Approved)				0	0	0	0	0	0	0	0	0	0	0	0	0	0	0	0	0	0	0	0
ATP6V0E2	155066	symbol	H. sapiens	155066	H. sapiens	ATP6V0E2	ATPase H+ transporting V0 subunit e2	GO:0007035 vacuolar acidification;GO:0051452 intracellular pH reduction;GO:0045851 pH reduction							0	0	0	0	0	0	1	0	1	0	0	0	0	0	0	0	0	0	0	0
EBI3	10148	symbol	H. sapiens	10148	H. sapiens	EBI3	Epstein-Barr virus induced 3	GO:0033210 leptin-mediated signaling pathway;GO:0044320 cellular response to leptin stimulus;GO:0042088 T-helper 1 type immune response		Predicted secreted proteins			(M36)PID IL27 PATHWAY; (M5883)NABA SECRETED FACTORS; (M5885)NABA MATRISOME ASSOCIATED	(M5897)HALLMARK IL6 JAK STAT3 SIGNALING; (M5932)HALLMARK INFLAMMATORY RESPONSE	0	0	0	0	0	0	0	0	0	0	0	0	0	0	0	0	0	0	0	0
HMCES	56941	symbol	H. sapiens	56941	H. sapiens	HMCES	5-hydroxymethylcytosine binding, ES cell specific	GO:0018142 protein-DNA covalent cross-linking;GO:0018143 nucleic acid-protein covalent cross-linking;GO:0097681 double-strand break repair via alternative nonhomologous end joining		Predicted intracellular proteins	Nucleoplasm (Approved)				0	0	0	0	0	0	0	0	0	0	0	0	0	0	0	0	0	0	0	0
HCK	3055	symbol	H. sapiens	3055	H. sapiens	HCK	HCK proto-oncogene, Src family tyrosine kinase	GO:0002522 leukocyte migration involved in immune response;GO:0045728 respiratory burst after phagocytosis;GO:0002679 respiratory burst involved in defense response	Tyr protein kinase family	Kinases:Tyr protein kinases; Disease related genes; Potential drug targets; Enzymes; Predicted intracellular proteins; ENZYME proteins:Transferases	Vesicles (Supported); Additional: Cytosol;Plasma membrane	1-Ter-Butyl-3-P-Tolyl-1h-Pyrazolo[3,4-D]Pyrimidin-4-Ylamine; Phosphonotyrosine; Quercetin; Bosutinib; Fostamatinib	(M33)PID GLYPICAN 1PATHWAY; (M252)PID IL8 CXCR1 PATHWAY; (M76)PID P38 ALPHA BETA PATHWAY		0	0	0	0	0	0	1	0	0	1	0	0	0	0	0	0	1	0	0	0
NUP210	23225	symbol	H. sapiens	23225	H. sapiens	NUP210	nucleoporin 210	GO:0051028 mRNA transport;GO:0050657 nucleic acid transport;GO:0050658 RNA transport		Transporters:Transporter channels and pores					0	0	0	0	0	0	0	0	0	0	0	0	0	0	0	0	0	0	0	0
ARHGEF17	9828	symbol	H. sapiens	9828	H. sapiens	ARHGEF17	Rho guanine nucleotide exchange factor 17	GO:0051056 regulation of small GTPase mediated signal transduction;GO:0030036 actin cytoskeleton organization;GO:0030029 actin filament-based process		Predicted intracellular proteins	Cytosol (Approved)		(M68)PID RHOA REG PATHWAY		0	0	0	0	0	0	0	0	0	0	0	0	0	0	0	1	0	0	0	0
BSCL2	26580	symbol	H. sapiens	26580	H. sapiens	BSCL2	BSCL2 lipid droplet biogenesis associated, seipin	GO:0140042 lipid droplet formation;GO:0050995 negative regulation of lipid catabolic process;GO:0034389 lipid droplet organization		Human disease related genes:Nervous system diseases:Other nervous and sensory system diseases; Predicted intracellular proteins; Disease related genes; Potential drug targets; Transporters:Transporter channels and pores; Human disease related genes:Nervous system diseases:Neurodegenerative diseases; Human disease related genes:Congenital disorders of metabolism:Other congenital disorders of metab…					0	0	0	0	0	0	0	0	0	0	0	0	0	0	0	0	0	0	0	0
SYNE2	23224	symbol	H. sapiens	23224	H. sapiens	SYNE2	spectrin repeat containing nuclear envelope protein 2	GO:0021817 nucleokinesis involved in cell motility in cerebral cortex radial glia guided migration;GO:0031022 nuclear migration along microfilament;GO:0030473 nuclear migration along microtubule		Predicted intracellular proteins; Human disease related genes:Musculoskeletal diseases:Muscular diseases; Disease related genes	Intermediate filaments;Nuclear membrane (Approved)				0	0	0	0	0	0	0	0	0	0	0	0	0	1	1	1	0	0	0	0
HES4	57801	symbol	H. sapiens	57801	H. sapiens	HES4	hes family bHLH transcription factor 4	GO:0009952 anterior/posterior pattern specification;GO:0003002 regionalization;GO:0007389 pattern specification process		Transcription factors:Basic domains; Predicted intracellular proteins	Nucleoplasm (Approved); Additional: Cytosol;Vesicles				0	0	0	0	0	0	0	0	1	1	0	0	0	0	0	0	0	0	0	0
LASP1	3927	symbol	H. sapiens	3927	H. sapiens	LASP1	LIM and SH3 protein 1	GO:0034220 ion transmembrane transport;GO:0055085 transmembrane transport;GO:0006811 ion transport		Predicted intracellular proteins; Cancer-related genes	Cytosol;Plasma membrane (Supported); Additional: Focal adhesion sites				0	0	0	0	0	0	0	0	0	0	0	0	0	0	0	0	0	0	0	0
SOX11	6664	symbol	H. sapiens	6664	H. sapiens	SOX11	SRY-box transcription factor 11	GO:2001109 regulation of lens epithelial cell proliferation;GO:2001111 positive regulation of lens epithelial cell proliferation;GO:0061386 closure of optic fissure		Human disease related genes:Other diseases:Mental and behavioural disorders; Human disease related genes:Congenital malformations:Other congenital malformations; Disease related genes; Transcription factors:Other all-alpha-helical DNA-binding domains; Predicted intracellular proteins	Nucleoplasm (Supported); Additional: Plasma membrane				0	1	1	0	1	0	0	0	0	1	1	0	0	1	1	0	0	0	0	1
GRIPAP1	56850	symbol	H. sapiens	56850	H. sapiens	GRIPAP1	GRIP1 associated protein 1	GO:0099158 regulation of recycling endosome localization within postsynapse;GO:0099152 regulation of neurotransmitter receptor transport, endosome to postsynaptic membrane;GO:1905749 regulation of endosome to plasma membrane protein transport		Predicted intracellular proteins	Cytosol;Vesicles (Approved)				0	0	0	0	0	0	0	0	0	0	0	0	0	0	0	0	0	0	0	0
SHFM1	1749	gene_synonym	H. sapiens	1749	H. sapiens	DLX5	distal-less homeobox 5	GO:0060166 olfactory pit development;GO:0097376 interneuron axon guidance;GO:0021889 olfactory bulb interneuron differentiation		Human disease related genes:Congenital malformations:Congenital malformations of the musculoskeletal system; Transcription factors:Helix-turn-helix domains; Predicted intracellular proteins; Disease related genes	Nucleoplasm (Approved)		(M236)PID DELTA NP63 PATHWAY		0	1	0	1	1	0	1	1	0	0	1	0	0	0	1	0	0	0	0	1
SMO	6608	symbol	H. sapiens	6608	H. sapiens	SMO	smoothened, frizzled class receptor	GO:0007371 ventral midline determination;GO:0072036 mesenchymal to epithelial transition involved in renal vesicle formation;GO:0072285 mesenchymal to epithelial transition involved in metanephric renal vesicle formation		Transporters; FDA approved drug targets:Small molecule drugs; Human disease related genes:Cancers:Cancers of eye, brain, and central nervous system; G-protein coupled receptors:Family fz/smo receptors; Disease related genes; G-protein coupled receptors:GPCRs excl olfactory receptors; Cancer-related genes; Human disease related genes:Cancers:Skin cancers		Fluocinonide; Halcinonide; Vismodegib; Sonidegib; Glasdegib	(M211)PID HEDGEHOG 2PATHWAY; (M219)PID HEDGEHOG GLI PATHWAY		0	1	1	1	1	0	0	0	1	1	1	0	0	1	1	0	0	1	0	1
HES5	388585	symbol	H. sapiens	388585	H. sapiens	HES5	hes family bHLH transcription factor 5	GO:2000978 negative regulation of forebrain neuron differentiation;GO:1905457 negative regulation of lymphoid progenitor cell differentiation;GO:2000974 negative regulation of pro-B cell differentiation		Transcription factors:Basic domains; Predicted intracellular proteins	Nucleoplasm (Approved); Additional: Cytosol;Nuclear speckles		(M81)PID CDC42 PATHWAY		0	1	0	1	0	0	0	1	1	1	1	0	1	1	1	0	0	0	0	1
NGF	4803	symbol	H. sapiens	4803	H. sapiens	NGF	nerve growth factor	GO:0048672 positive regulation of collateral sprouting;GO:0038180 nerve growth factor signaling pathway;GO:0048670 regulation of collateral sprouting		Candidate cardiovascular disease genes; Human disease related genes:Nervous system diseases:Other nervous and sensory system diseases; Cancer-related genes:Candidate cancer biomarkers; Predicted secreted proteins; Disease related genes; RAS pathway related proteins; Predicted intracellular proteins		Clenbuterol; RI 624; Polaprezinc	(M18895)SA TRKA RECEPTOR; (M271)PID PI3K PLC TRK PATHWAY; (M100)PID SHP2 PATHWAY	(M5923)HALLMARK PI3K AKT MTOR SIGNALING; (M5953)HALLMARK KRAS SIGNALING UP	1	0	0	1	0	0	1	0	0	0	0	0	1	1	1	0	1	0	0	0
TRPT1	83707	symbol	H. sapiens	83707	H. sapiens	TRPT1	tRNA phosphotransferase 1	GO:0006388 tRNA splicing, via endonucleolytic cleavage and ligation;GO:0000394 RNA splicing, via endonucleolytic cleavage and ligation;GO:0008033 tRNA processing		Enzymes; Predicted intracellular proteins; ENZYME proteins:Transferases	Mitochondria (Approved)				0	0	0	0	0	0	0	0	0	0	0	0	1	0	0	0	0	0	0	0
LOC100288911	100288911	Gene_ID	H. sapiens	100288911	H. sapiens	CRIM1-DT	CRIM1 divergent transcript								0	0	0	0	0	0	0	0	0	0	0	0	0	0	0	0	0	0	0	0
MEX3A	92312	symbol	H. sapiens	92312	H. sapiens	MEX3A	mex-3 RNA binding family member A			Predicted intracellular proteins	Cytosol (Supported)				0	0	0	0	0	0	0	0	0	0	0	0	0	0	0	0	0	0	0	0
CDH3	1001	symbol	H. sapiens	1001	H. sapiens	CDH3	cadherin 3	GO:0051796 negative regulation of timing of catagen;GO:0060901 regulation of hair cycle by canonical Wnt signaling pathway;GO:1902910 positive regulation of melanosome transport		Human disease related genes:Congenital malformations:Other congenital malformations; Predicted intracellular proteins; Disease related genes	Plasma membrane (Supported); Additional: Cell Junctions			(M5915)HALLMARK APICAL JUNCTION	1	0	0	0	1	1	0	0	1	0	1	0	0	0	0	0	0	0	0	0
PATZ1	23598	symbol	H. sapiens	23598	H. sapiens	PATZ1	POZ/BTB and AT hook containing zinc finger 1	GO:0010596 negative regulation of endothelial cell migration;GO:0010633 negative regulation of epithelial cell migration;GO:0008584 male gonad development		Transcription factors:Zinc-coordinating DNA-binding domains; Predicted intracellular proteins; Cancer-related genes; Disease related genes	Nucleoplasm (Supported)		(M58)PID AR PATHWAY		0	0	0	0	0	0	0	0	0	0	0	0	0	0	0	0	0	0	0	0
CDK18	5129	symbol	H. sapiens	5129	H. sapiens	CDK18	cyclin dependent kinase 18	GO:0000083 regulation of transcription involved in G1/S transition of mitotic cell cycle;GO:0000082 G1/S transition of mitotic cell cycle;GO:0044843 cell cycle G1/S phase transition	CMGC Ser/Thr protein kinase family	Enzymes; Kinases:CMGC Ser/Thr protein kinases; Predicted intracellular proteins; ENZYME proteins:Transferases	Actin filaments (Approved)				0	0	0	0	0	0	0	0	0	0	0	0	0	0	0	0	0	0	0	0
PIK3C2B	5287	symbol	H. sapiens	5287	H. sapiens	PIK3C2B	phosphatidylinositol-4-phosphate 3-kinase catalytic subunit type 2 beta	GO:0036092 phosphatidylinositol-3-phosphate biosynthetic process;GO:0014065 phosphatidylinositol 3-kinase signaling;GO:0046854 phosphatidylinositol phosphate biosynthetic process		Enzymes; Predicted intracellular proteins; ENZYME proteins:Transferases	Nucleoplasm (Approved); Additional: Cytosol	Fostamatinib	(M231)PID KIT PATHWAY		0	0	0	0	0	0	0	0	1	0	0	0	0	0	0	0	0	0	0	0
DNMT3A	1788	symbol	H. sapiens	1788	H. sapiens	DNMT3A	DNA methyltransferase 3 alpha	GO:1903925 response to bisphenol A;GO:1903926 cellular response to bisphenol A;GO:0090116 C-5 methylation of cytosine		Cancer-related genes:Mutated cancer genes; Human disease related genes:Cancers:Cancers of haematopoietic and lymphoid tissues; Human disease related genes:Cardiovascular diseases:Hematologic diseases; Cancer-related genes:Mutational cancer driver genes; Transcription factors:Zinc-coordinating DNA-binding domains; Human disease related genes:Congenital malformations:Other congenital malformations;…	Nucleoplasm (Supported)	Procaine	(M254)PID MYC REPRESS PATHWAY		0	0	0	0	0	0	0	0	0	0	0	0	0	0	0	0	0	0	0	0
ERMN	57471	symbol	H. sapiens	57471	H. sapiens	ERMN	ermin	GO:0008360 regulation of cell shape;GO:0001763 morphogenesis of a branching structure;GO:0007015 actin filament organization		Predicted intracellular proteins	Plasma membrane (Approved); Additional: Cytosol				0	0	0	0	0	0	0	0	0	1	0	0	0	0	1	1	0	0	0	0
PTGES	9536	symbol	H. sapiens	9536	H. sapiens	PTGES	prostaglandin E synthase	GO:0031620 regulation of fever generation;GO:0031650 regulation of heat generation;GO:0032306 regulation of prostaglandin secretion		Enzymes; ENZYME proteins:Isomerase; ENZYME proteins:Transferases	Endoplasmic reticulum (Supported)			(M5906)HALLMARK ESTROGEN RESPONSE EARLY; (M5907)HALLMARK ESTROGEN RESPONSE LATE; (M5934)HALLMARK XENOBIOTIC METABOLISM	0	0	0	0	0	0	0	0	0	0	0	0	0	0	0	0	0	0	0	0
ISYNA1	51477	symbol	H. sapiens	51477	H. sapiens	ISYNA1	inositol-3-phosphate synthase 1	GO:0006021 inositol biosynthetic process;GO:0006020 inositol metabolic process;GO:0046173 polyol biosynthetic process		Enzymes; ENZYME proteins:Isomerase; Predicted intracellular proteins	Nucleoplasm (Approved); Additional: Cytosol	2-Deoxy-D-Glucitol 6-(E)-Vinylhomophosphonate; 2-Deoxy-Glucitol-6-Phosphate; Glycerin			0	0	0	0	0	0	0	0	0	0	0	0	0	0	0	0	0	0	0	0
GLCCI1	113263	symbol	H. sapiens	113263	H. sapiens	GLCCI1	glucocorticoid induced 1			Predicted intracellular proteins	Nucleoli (Approved)				0	0	0	0	0	0	0	0	0	0	0	0	0	0	0	0	0	0	0	0
NARF	26502	symbol	H. sapiens	26502	H. sapiens	NARF	nuclear prelamin A recognition factor			Predicted intracellular proteins	Nucleoplasm (Supported); Additional: Nucleoli			(M5945)HALLMARK HEME METABOLISM	0	0	0	0	0	0	0	0	0	0	0	0	0	0	0	0	0	0	0	0
APOA1BP	128240	gene_synonym	H. sapiens	128240	H. sapiens	NAXE	NAD(P)HX epimerase	GO:0031580 membrane raft distribution;GO:0051665 membrane raft localization;GO:0031579 membrane raft organization		Predicted secreted proteins; Disease related genes; Potential drug targets; Enzymes; ENZYME proteins:Isomerase; Human disease related genes:Nervous system diseases:Neurodegenerative diseases	Nucleoplasm (Approved); Additional: Cytosol;Vesicles				0	1	0	0	0	0	0	0	0	0	0	0	0	0	0	0	0	0	0	0
L1CAM	3897	symbol	H. sapiens	3897	H. sapiens	L1CAM	L1 cell adhesion molecule	GO:0045773 positive regulation of axon extension;GO:0050772 positive regulation of axonogenesis;GO:0030516 regulation of axon extension		Human disease related genes:Congenital malformations:Congenital malformations of the nervous system; CD markers; Human disease related genes:Nervous system diseases:Other nervous and sensory system diseases; Disease related genes; Predicted intracellular proteins	Nucleoplasm;Plasma membrane (Approved)	Ethanol	(M53)PID INTEGRIN3 PATHWAY	(M5919)HALLMARK HEDGEHOG SIGNALING	0	0	0	1	0	0	0	0	0	0	0	0	0	0	1	0	1	0	0	0
H3F3B	3021	gene_synonym	H. sapiens	3021	H. sapiens	H3-3B	H3.3 histone B	GO:0031508 pericentric heterochromatin assembly;GO:0140462 pericentric heterochromatin organization;GO:1902340 negative regulation of chromosome condensation		Predicted intracellular proteins; Cancer-related genes; Disease related genes	Nucleoplasm (Enhanced)				0	0	1	0	0	0	0	0	0	0	0	0	0	0	0	0	0	0	0	0
COL25A1	84570	symbol	H. sapiens	84570	H. sapiens	COL25A1	collagen type XXV alpha 1 chain			Human disease related genes:Nervous system diseases:Eye disease; Predicted intracellular proteins; Disease related genes	Cytosol;Vesicles (Approved); Additional: Endoplasmic reticulum		(M3005)NABA COLLAGENS; (M5884)NABA CORE MATRISOME; (M5889)NABA MATRISOME		0	0	0	0	0	0	0	0	0	0	0	0	0	0	0	0	0	0	0	0
ENDOV	284131	symbol	H. sapiens	284131	H. sapiens	ENDOV	endonuclease V	GO:0090502 RNA phosphodiester bond hydrolysis, endonucleolytic;GO:0090501 RNA phosphodiester bond hydrolysis;GO:0090305 nucleic acid phosphodiester bond hydrolysis		Predicted intracellular proteins					0	0	0	0	0	0	0	0	0	0	0	0	0	0	0	0	0	0	0	0
KISS1	3814	symbol	H. sapiens	3814	H. sapiens	KISS1	KiSS-1 metastasis suppressor	GO:0060112 generation of ovulation cycle rhythm;GO:0033686 positive regulation of luteinizing hormone secretion;GO:0033684 regulation of luteinizing hormone secretion		Human disease related genes:Endocrine and metabolic diseases:Hypothalamus and pituitary gland diseases; Predicted secreted proteins; Disease related genes; Cancer-related genes:Candidate cancer biomarkers	Vesicles (Approved)				0	0	0	0	0	0	0	0	0	0	0	0	0	0	0	0	0	0	1	0
TMEM255A	55026	symbol	H. sapiens	55026	H. sapiens	TMEM255A	transmembrane protein 255A	GO:0009617 response to bacterium;GO:0051707 response to other organism;GO:0043207 response to external biotic stimulus		Transporters	Nuclear bodies;Nucleoplasm (Uncertain)				0	0	0	0	0	0	0	0	0	0	0	0	0	0	0	0	0	0	0	0
IQGAP2	10788	symbol	H. sapiens	10788	H. sapiens	IQGAP2	IQ motif containing GTPase activating protein 2	GO:0070493 thrombin-activated receptor signaling pathway;GO:0034314 Arp2/3 complex-mediated actin nucleation;GO:0045010 actin nucleation		Predicted intracellular proteins	Plasma membrane;Vesicles (Approved)			(M5908)HALLMARK ANDROGEN RESPONSE	0	0	0	0	0	0	0	0	0	0	0	0	0	0	0	1	1	0	0	0
RNF207	388591	symbol	H. sapiens	388591	H. sapiens	RNF207	ring finger protein 207	GO:1903952 regulation of voltage-gated potassium channel activity involved in atrial cardiac muscle cell action potential repolarization;GO:1903954 positive regulation of voltage-gated potassium channel activity involved in atrial cardiac muscle cell action potential repolarization;GO:1901207 regulation of heart looping		Predicted intracellular proteins	Cytosol (Approved)				0	0	0	0	0	0	0	0	0	0	1	0	0	0	0	0	0	0	1	0
SHROOM2	357	symbol	H. sapiens	357	H. sapiens	SHROOM2	shroom family member 2	GO:0008057 eye pigment granule organization;GO:0043476 pigment accumulation;GO:0043482 cellular pigment accumulation		Predicted intracellular proteins	Cell Junctions;Plasma membrane (Approved); Additional: Cytosol			(M5916)HALLMARK APICAL SURFACE; (M5893)HALLMARK MITOTIC SPINDLE; (M5915)HALLMARK APICAL JUNCTION	0	1	0	0	0	0	0	0	0	0	0	0	0	0	1	1	0	0	0	0
ACTN1	87	symbol	H. sapiens	87	H. sapiens	ACTN1	actinin alpha 1	GO:0051639 actin filament network formation;GO:0030220 platelet formation;GO:0036344 platelet morphogenesis		Human disease related genes:Cardiovascular diseases:Hematologic diseases; FDA approved drug targets:Biotech drugs; Predicted intracellular proteins; Disease related genes	Actin filaments;Focal adhesion sites;Plasma membrane (Approved)	Human calcitonin; Copper	(M165)PID SYNDECAN 4 PATHWAY; (M232)PID ECADHERIN STABILIZATION PATHWAY; (M71)PID ILK PATHWAY	(M5908)HALLMARK ANDROGEN RESPONSE; (M5915)HALLMARK APICAL JUNCTION	0	0	1	1	0	0	0	0	0	0	0	0	0	0	0	1	0	0	0	0
WNT2B	7482	symbol	H. sapiens	7482	H. sapiens	WNT2B	Wnt family member 2B	GO:0060492 lung induction;GO:0061046 regulation of branching involved in lung morphogenesis;GO:0060638 mesenchymal-epithelial cell signaling		Predicted intracellular proteins; Predicted secreted proteins; Human disease related genes:Digestive system diseases:Gastrointestinal diseases; Disease related genes	Vesicles (Approved); Additional: Nucleoplasm		(M5493)WNT SIGNALING; (M5883)NABA SECRETED FACTORS; (M5885)NABA MATRISOME ASSOCIATED		1	1	0	0	0	1	0	0	1	1	1	1	0	0	1	0	0	0	0	0
EFNB1	1947	symbol	H. sapiens	1947	H. sapiens	EFNB1	ephrin B1	GO:0031295 T cell costimulation;GO:0031294 lymphocyte costimulation;GO:0048013 ephrin receptor signaling pathway		Human disease related genes:Congenital malformations:Other congenital malformations; Disease related genes; Cancer-related genes:Candidate cancer biomarkers	Plasma membrane (Supported)		(M257)PID EPHRINB REV PATHWAY; (M62)PID EPHB FWD PATHWAY		0	0	0	1	0	0	1	0	0	1	0	0	0	0	0	0	0	1	0	0
PTPN3	5774	symbol	H. sapiens	5774	H. sapiens	PTPN3	protein tyrosine phosphatase non-receptor type 3	GO:0098902 regulation of membrane depolarization during action potential;GO:0051045 negative regulation of membrane protein ectodomain proteolysis;GO:0051043 regulation of membrane protein ectodomain proteolysis		Enzymes; ENZYME proteins:Hydrolases; Predicted intracellular proteins					0	0	0	0	0	0	1	0	0	0	0	0	0	0	0	0	0	0	1	0
RHOB	388	symbol	H. sapiens	388	H. sapiens	RHOB	ras homolog family member B	GO:0003159 morphogenesis of an endothelium;GO:0061154 endothelial tube morphogenesis;GO:0030865 cortical cytoskeleton organization		Predicted intracellular proteins; Cancer-related genes:Candidate cancer biomarkers		Botulinum toxin type A	(M153)PID P75 NTR PATHWAY; (M124)PID CXCR4 PATHWAY	(M5941)HALLMARK UV RESPONSE UP; (M5902)HALLMARK APOPTOSIS; (M5947)HALLMARK IL2 STAT5 SIGNALING	0	1	0	1	0	0	0	1	0	1	0	0	0	0	0	1	1	0	0	0
EPHA2	1969	symbol	H. sapiens	1969	H. sapiens	EPHA2	EPH receptor A2	GO:0060034 notochord cell differentiation;GO:0060035 notochord cell development;GO:0014028 notochord formation	Tyr protein kinase family	FDA approved drug targets:Small molecule drugs; Cancer-related genes:Mutated cancer genes; Cancer-related genes:Candidate cancer biomarkers; Human disease related genes:Nervous system diseases:Eye disease; Kinases:Tyr protein kinases; Disease related genes; Enzymes; RAS pathway related proteins; ENZYME proteins:Transferases	Cell Junctions;Plasma membrane (Supported); Additional: Golgi apparatus;Nuclear speckles	Dasatinib; Phosphoaminophosphonic Acid-Adenylate Ester; Regorafenib; Fostamatinib	(M273)PID EPHA2 FWD PATHWAY; (M177)PID EPHA FWDPATHWAY; (M86)PID ARF6 PATHWAY	(M5934)HALLMARK XENOBIOTIC METABOLISM; (M5939)HALLMARK P53 PATHWAY	1	1	0	1	1	1	1	0	0	1	0	0	1	0	1	0	0	1	0	1
PGM5P2	595135	symbol	H. sapiens	595135	H. sapiens	PGM5P2	phosphoglucomutase 5 pseudogene 2								0	0	0	0	0	0	0	0	0	0	0	0	0	0	0	0	0	0	0	0
PCBD1	5092	symbol	H. sapiens	5092	H. sapiens	PCBD1	pterin-4 alpha-carbinolamine dehydratase 1	GO:0006571 tyrosine biosynthetic process;GO:0009073 aromatic amino acid family biosynthetic process;GO:0009095 aromatic amino acid family biosynthetic process, prephenate pathway		Human disease related genes:Congenital disorders of metabolism:Congenital disorders of amino acid metabolism; ENZYME proteins:Lyases; Disease related genes; Potential drug targets; Enzymes; Predicted intracellular proteins	Nucleoplasm (Enhanced); Additional: Cytosol	L-erythro-7,8-dihydrobiopterin		(M5935)HALLMARK FATTY ACID METABOLISM	0	0	0	0	0	0	0	0	0	0	0	0	0	0	0	0	0	0	0	0
RASGRP2	10235	symbol	H. sapiens	10235	H. sapiens	RASGRP2	RAS guanyl releasing protein 2	GO:0071277 cellular response to calcium ion;GO:0051592 response to calcium ion;GO:0007265 Ras protein signal transduction		Human disease related genes:Cardiovascular diseases:Hematologic diseases; RAS pathway related proteins; Predicted intracellular proteins; Disease related genes	Plasma membrane (Supported)		(M269)PID RAS PATHWAY; (M88)PID CD8 TCR PATHWAY; (M34)PID TCR PATHWAY		0	0	0	0	0	0	0	0	1	0	0	0	0	0	0	0	0	0	0	0
TFAP2A-AS1	100130275	symbol	H. sapiens	100130275	H. sapiens	TFAP2A-AS1	TFAP2A antisense RNA 1								0	0	0	0	0	0	0	0	0	0	0	0	0	0	0	0	0	0	0	0
LAT	27040	symbol	H. sapiens	27040	H. sapiens	LAT	linker for activation of T cells	GO:0002279 mast cell activation involved in immune response;GO:0043303 mast cell degranulation;GO:0002448 mast cell mediated immunity		RAS pathway related proteins; Predicted intracellular proteins; Disease related genes	Plasma membrane (Supported); Additional: Golgi apparatus		(M190)PID TCR JNK PATHWAY; (M141)PID PI3KCI PATHWAY; (M50)PID PTP1B PATHWAY		0	0	0	0	0	0	0	0	0	0	1	0	1	0	0	0	0	0	0	0
EFHD1	80303	symbol	H. sapiens	80303	H. sapiens	EFHD1	EF-hand domain family member D1	GO:1900069 regulation of cellular hyperosmotic salinity response;GO:1901000 regulation of response to salt stress;GO:0106049 regulation of cellular response to osmotic stress		Predicted intracellular proteins	Golgi apparatus (Supported); Additional: Nucleoli fibrillar center			(M5956)HALLMARK KRAS SIGNALING DN	0	0	0	1	0	0	0	0	0	0	0	0	0	0	0	0	0	0	0	0
CHRNA1	1134	symbol	H. sapiens	1134	H. sapiens	CHRNA1	cholinergic receptor nicotinic alpha 1 subunit	GO:0048630 skeletal muscle tissue growth;GO:0046716 muscle cell cellular homeostasis;GO:0007274 neuromuscular synaptic transmission		Human disease related genes:Congenital malformations:Other congenital malformations; Transporters:Transporter channels and pores; Disease related genes; Human disease related genes:Nervous system diseases:Other nervous and sensory system diseases	Plasma membrane (Supported)	Lamotrigine; Agmatine	(M175)PID ERBB2 ERBB3 PATHWAY	(M5909)HALLMARK MYOGENESIS	0	0	1	0	0	0	0	0	1	1	0	0	0	0	0	0	0	0	1	0
MDK	4192	symbol	H. sapiens	4192	H. sapiens	MDK	midkine	GO:0030421 defecation;GO:0106091 glial cell projection elongation;GO:1905555 positive regulation of blood vessel branching		Predicted secreted proteins; Cancer-related genes:Candidate cancer biomarkers	Vesicles (Approved)		(M165)PID SYNDECAN 4 PATHWAY; (M277)PID INTEGRIN A4B1 PATHWAY; (M18)PID INTEGRIN1 PATHWAY	(M5907)HALLMARK ESTROGEN RESPONSE LATE; (M5915)HALLMARK APICAL JUNCTION	1	0	0	1	0	0	1	0	0	0	1	0	0	1	1	0	1	0	0	0
ADAMTS7	11173	symbol	H. sapiens	11173	H. sapiens	ADAMTS7	ADAM metallopeptidase with thrombospondin type 1 motif 7	GO:0043931 ossification involved in bone maturation;GO:0070977 bone maturation;GO:0032331 negative regulation of chondrocyte differentiation		Predicted secreted proteins	Vesicles (Supported)		(M3468)NABA ECM REGULATORS; (M5885)NABA MATRISOME ASSOCIATED; (M5889)NABA MATRISOME		0	0	0	0	0	0	1	0	0	0	0	0	0	0	0	1	0	0	0	0
LOC102723854	102723854	Gene_ID	H. sapiens	102723854	H. sapiens	LINC01819	long intergenic non-protein coding RNA 1819								0	0	0	0	0	0	0	0	0	0	0	0	0	0	0	0	0	0	0	0
RNASET2	8635	symbol	H. sapiens	8635	H. sapiens	RNASET2	ribonuclease T2	GO:0090502 RNA phosphodiester bond hydrolysis, endonucleolytic;GO:0090501 RNA phosphodiester bond hydrolysis;GO:0006401 RNA catabolic process		Predicted secreted proteins; Human disease related genes:Congenital disorders of metabolism:Congenital disorders of lipid/glycolipid metabolism; Predicted intracellular proteins; ENZYME proteins:Lyases; Disease related genes; Potential drug targets; Enzymes; Human disease related genes:Nervous system diseases:Neurodegenerative diseases					0	0	0	0	0	0	0	0	0	0	0	0	0	0	0	0	0	0	0	0
BOLA3-AS1	100507171	gene_synonym	H. sapiens	100507171	H. sapiens	BOLA3-DT	BOLA3 divergent transcript								0	0	0	0	0	0	0	0	0	0	0	0	0	0	0	0	0	0	0	0
SLFN13	146857	symbol	H. sapiens	146857	H. sapiens	SLFN13	schlafen family member 13	GO:0016078 tRNA catabolic process;GO:0016075 rRNA catabolic process;GO:0034661 ncRNA catabolic process		Predicted intracellular proteins	Cytokinetic bridge (Approved)				0	0	0	0	0	0	0	0	0	0	0	0	0	0	0	0	0	0	0	0
CCNJL	79616	symbol	H. sapiens	79616	H. sapiens	CCNJL	cyclin J like	GO:0000079 regulation of cyclin-dependent protein serine/threonine kinase activity;GO:1904029 regulation of cyclin-dependent protein kinase activity;GO:0044772 mitotic cell cycle phase transition		Predicted intracellular proteins	Nuclear speckles (Approved)				0	0	0	0	0	0	0	0	0	0	0	0	1	0	0	0	0	0	0	0
ABHD8	79575	symbol	H. sapiens	79575	H. sapiens	ABHD8	abhydrolase domain containing 8	GO:0006654 phosphatidic acid biosynthetic process;GO:0046473 phosphatidic acid metabolic process;GO:0055088 lipid homeostasis		Predicted intracellular proteins	Nucleoplasm (Approved); Additional: Nuclear bodies				0	0	0	0	0	0	0	0	0	0	0	0	0	0	0	0	0	0	0	0
SRF	6722	symbol	H. sapiens	6722	H. sapiens	SRF	serum response factor	GO:0060532 bronchus cartilage development;GO:0061145 lung smooth muscle development;GO:0010735 positive regulation of transcription via serum response element binding		Transcription factors:alpha-Helices exposed by beta-structures; Predicted intracellular proteins	Nucleoplasm (Supported)		(M199)PID P38 MK2 PATHWAY; (M206)PID PDGFRA PATHWAY; (M30)PID HDAC CLASSII PATHWAY	(M5908)HALLMARK ANDROGEN RESPONSE	0	1	1	1	1	0	1	0	0	1	1	0	0	0	1	1	1	1	1	0
WBSCR22	114049	gene_synonym	H. sapiens	114049	H. sapiens	BUD23	BUD23 rRNA methyltransferase and ribosome maturation factor	GO:0070476 rRNA (guanine-N7)-methylation;GO:0036265 RNA (guanine-N7)-methylation;GO:2000234 positive regulation of rRNA processing		Human disease related genes:Other congenital disorders:Chromosomal abnormalities; Predicted intracellular proteins	Nucleoli;Nucleoplasm (Supported)				0	0	0	0	0	0	0	0	0	0	0	0	0	0	0	0	0	0	0	0
TMC6	11322	symbol	H. sapiens	11322	H. sapiens	TMC6	transmembrane channel like 6	GO:0034220 ion transmembrane transport;GO:0055085 transmembrane transport;GO:0006811 ion transport		Human disease related genes:Skin diseases:Skin and soft tissue diseases; Disease related genes; Potential drug targets; Transporters:Transporter channels and pores; Predicted intracellular proteins					0	0	0	0	0	0	0	0	0	0	0	0	0	0	0	0	0	0	0	0
LRP5	4041	symbol	H. sapiens	4041	H. sapiens	LRP5	LDL receptor related protein 5	GO:0060764 cell-cell signaling involved in mammary gland development;GO:0110135 Norrin signaling pathway;GO:1902262 apoptotic process involved in blood vessel morphogenesis		Human disease related genes:Congenital malformations:Congenital malformations of the musculoskeletal system; Human disease related genes:Congenital malformations:Other congenital malformations; Human disease related genes:Nervous system diseases:Eye disease; Human disease related genes:Musculoskeletal diseases:Skeletal diseases; Disease related genes; Predicted intracellular proteins			(M77)PID WNT SIGNALING PATHWAY; (M266)PID NCADHERIN PATHWAY; (M5493)WNT SIGNALING		1	1	0	0	0	0	0	0	1	1	1	1	1	0	0	0	0	1	0	0
TMEM101	84336	symbol	H. sapiens	84336	H. sapiens	TMEM101	transmembrane protein 101	GO:0043123 positive regulation of I-kappaB kinase/NF-kappaB signaling;GO:0043122 regulation of I-kappaB kinase/NF-kappaB signaling;GO:1902533 positive regulation of intracellular signal transduction		Transporters; Predicted intracellular proteins	Nucleoplasm;Plasma membrane (Approved)				0	0	0	0	0	0	0	0	0	0	0	0	0	0	0	0	0	0	0	0
FOXC2	2303	symbol	H. sapiens	2303	H. sapiens	FOXC2	forkhead box C2	GO:1902257 negative regulation of apoptotic process involved in outflow tract morphogenesis;GO:0048342 paraxial mesodermal cell differentiation;GO:0048343 paraxial mesodermal cell fate commitment		Human disease related genes:Congenital malformations:Congenital malformations of skin; Transcription factors:Helix-turn-helix domains; Predicted intracellular proteins; Disease related genes	Nuclear bodies;Nucleoplasm (Supported)			(M5930)HALLMARK EPITHELIAL MESENCHYMAL TRANSITION	0	1	1	0	1	0	1	0	1	1	1	0	0	0	0	1	1	1	0	0
ISG15	9636	symbol	H. sapiens	9636	H. sapiens	ISG15	ISG15 ubiquitin like modifier	GO:0032461 positive regulation of protein oligomerization;GO:0032459 regulation of protein oligomerization;GO:0032020 ISG15-protein conjugation		Human disease related genes:Immune system diseases:Primary immunodeficiency; Predicted secreted proteins; Predicted intracellular proteins; Disease related genes				(M5911)HALLMARK INTERFERON ALPHA RESPONSE; (M5913)HALLMARK INTERFERON GAMMA RESPONSE	0	0	0	0	0	0	0	0	1	0	0	0	0	0	0	0	0	0	0	0
DIO2	1734	symbol	H. sapiens	1734	H. sapiens	DIO2	iodothyronine deiodinase 2	GO:0042404 thyroid hormone catabolic process;GO:0001514 selenocysteine incorporation;GO:0006451 translational readthrough		Enzymes; Predicted intracellular proteins; ENZYME proteins:Oxidoreductases	Nucleoplasm;Vesicles (Approved); Additional: Plasma membrane			(M5948)HALLMARK BILE ACID METABOLISM	0	0	0	0	0	0	0	0	0	0	0	0	0	0	0	0	0	0	0	0
ELOVL2	54898	symbol	H. sapiens	54898	H. sapiens	ELOVL2	ELOVL fatty acid elongase 2	GO:0019367 fatty acid elongation, saturated fatty acid;GO:0019368 fatty acid elongation, unsaturated fatty acid;GO:0034625 fatty acid elongation, monounsaturated fatty acid		Enzymes; ENZYME proteins:Transferases		alpha-Linolenic acid		(M5906)HALLMARK ESTROGEN RESPONSE EARLY	0	0	0	0	0	0	0	1	0	0	0	0	0	0	0	0	0	0	0	0
CD70	970	symbol	H. sapiens	970	H. sapiens	CD70	CD70 molecule	GO:0002456 T cell mediated immunity;GO:0042100 B cell proliferation;GO:0033209 tumor necrosis factor-mediated signaling pathway		Cancer-related genes:Mutated cancer genes; CD markers; Cancer-related genes:Candidate cancer biomarkers; Disease related genes; Predicted intracellular proteins	Nucleoplasm (Uncertain)			(M5932)HALLMARK INFLAMMATORY RESPONSE	0	0	0	0	0	0	0	0	0	0	0	0	0	0	0	0	0	0	0	0
UNC13D	201294	symbol	H. sapiens	201294	H. sapiens	UNC13D	unc-13 homolog D	GO:0002432 granuloma formation;GO:0043320 natural killer cell degranulation;GO:0002467 germinal center formation		Human disease related genes:Immune system diseases:Primary immunodeficiency; Predicted intracellular proteins; Disease related genes	Cytosol (Supported); Additional: Vesicles				0	1	0	0	0	0	0	0	0	0	0	0	0	0	1	0	0	0	0	0
LIMD1	8994	symbol	H. sapiens	8994	H. sapiens	LIMD1	LIM domain containing 1	GO:0035331 negative regulation of hippo signaling;GO:0033962 P-body assembly;GO:0002076 osteoblast development		Predicted intracellular proteins	Focal adhesion sites;Nucleoplasm (Supported)				1	0	0	0	0	1	0	0	0	0	0	0	0	0	0	0	0	0	0	0
IFT27	11020	symbol	H. sapiens	11020	H. sapiens	IFT27	intraflagellar transport 27	GO:0060122 inner ear receptor cell stereocilium organization;GO:0042073 intraciliary transport;GO:0060119 inner ear receptor cell development		Predicted intracellular proteins; Disease related genes; Human disease related genes:Congenital disorders of metabolism:Other congenital disorders of metabolism					0	1	0	1	0	0	0	0	0	1	0	0	0	0	0	0	0	0	0	0
LINC01336	51301	gene_synonym	H. sapiens	51301	H. sapiens	GCNT4	glucosaminyl (N-acetyl) transferase 4	GO:0002121 inter-male aggressive behavior;GO:0002118 aggressive behavior;GO:0042403 thyroid hormone metabolic process		Enzymes; Predicted intracellular proteins; ENZYME proteins:Transferases	Golgi apparatus (Supported); Additional: Nucleoplasm				0	1	0	0	0	0	0	0	0	1	1	0	0	0	0	0	0	0	0	0
RNFT2	84900	symbol	H. sapiens	84900	H. sapiens	RNFT2	ring finger protein, transmembrane 2	GO:1904294 positive regulation of ERAD pathway;GO:1904292 regulation of ERAD pathway;GO:1905898 positive regulation of response to endoplasmic reticulum stress		Predicted intracellular proteins	Nucleoplasm (Approved); Additional: Cytosol				0	0	0	0	0	0	0	0	0	0	0	0	0	0	0	0	0	0	0	0
LRRC17	10234	symbol	H. sapiens	10234	H. sapiens	LRRC17	leucine rich repeat containing 17	GO:0048539 bone marrow development;GO:0045671 negative regulation of osteoclast differentiation;GO:0002762 negative regulation of myeloid leukocyte differentiation		Predicted secreted proteins	Vesicles (Approved); Additional: Cytokinetic bridge				0	0	0	0	0	0	0	0	0	0	0	0	0	0	0	0	0	0	0	0
SOX6	55553	symbol	H. sapiens	55553	H. sapiens	SOX6	SRY-box transcription factor 6	GO:2000741 positive regulation of mesenchymal stem cell differentiation;GO:0021529 spinal cord oligodendrocyte cell differentiation;GO:2000739 regulation of mesenchymal stem cell differentiation		Transcription factors:Other all-alpha-helical DNA-binding domains; Predicted intracellular proteins	Nucleoplasm (Supported)				0	0	1	0	0	0	1	0	0	1	0	0	0	1	1	0	0	0	0	0
PRKAR1B	5575	symbol	H. sapiens	5575	H. sapiens	PRKAR1B	protein kinase cAMP-dependent type I regulatory subunit beta	GO:0098693 regulation of synaptic vesicle cycle;GO:2000480 negative regulation of cAMP-dependent protein kinase activity;GO:2000479 regulation of cAMP-dependent protein kinase activity		Predicted intracellular proteins			(M277)PID INTEGRIN A4B1 PATHWAY		0	0	0	0	0	1	0	0	0	0	0	0	1	0	0	0	0	0	0	0
COX20	116228	symbol	H. sapiens	116228	H. sapiens	COX20	cytochrome c oxidase assembly factor COX20	GO:0033617 mitochondrial cytochrome c oxidase assembly;GO:0008535 respiratory chain complex IV assembly;GO:0017004 cytochrome complex assembly		Disease related genes; Human disease related genes:Congenital disorders of metabolism:Mitochondrial diseases	Mitochondria (Enhanced)				0	0	0	0	0	0	0	0	0	0	0	0	0	0	0	0	0	0	0	0
PPM1L	151742	symbol	H. sapiens	151742	H. sapiens	PPM1L	protein phosphatase, Mg2+/Mn2+ dependent 1L	GO:0030148 sphingolipid biosynthetic process;GO:0046467 membrane lipid biosynthetic process;GO:0006665 sphingolipid metabolic process		Enzymes; ENZYME proteins:Hydrolases; Predicted intracellular proteins	Cytosol (Approved); Additional: Nucleoplasm				0	0	0	0	0	0	1	0	0	0	0	0	0	0	0	0	0	0	0	0
TRAF4	9618	symbol	H. sapiens	9618	H. sapiens	TRAF4	TNF receptor associated factor 4	GO:0007250 activation of NF-kappaB-inducing kinase activity;GO:0038061 NIK/NF-kappaB signaling;GO:0007585 respiratory gaseous exchange by respiratory system		Predicted intracellular proteins; Cancer-related genes:Candidate cancer biomarkers	Nucleoli fibrillar center (Supported); Additional: Cytosol;Nucleoplasm		(M256)PID TAP63 PATHWAY	(M5939)HALLMARK P53 PATHWAY	0	0	0	0	0	0	0	0	1	0	0	0	1	0	0	0	0	0	0	0
ADCY6	112	symbol	H. sapiens	112	H. sapiens	ADCY6	adenylate cyclase 6	GO:1904116 response to vasopressin;GO:1904117 cellular response to vasopressin;GO:0035811 negative regulation of urine volume		Human disease related genes:Congenital malformations:Congenital malformations of the musculoskeletal system; ENZYME proteins:Lyases; Disease related genes; Potential drug targets; Enzymes; Predicted intracellular proteins	Golgi apparatus (Approved)		(M56)PID LPA4 PATHWAY; (M8)PID ENDOTHELIN PATHWAY; (M15)PID LYSOPHOSPHOLIPID PATHWAY	(M5898)HALLMARK DNA REPAIR; (M5905)HALLMARK ADIPOGENESIS	0	0	0	0	0	0	0	0	1	0	0	0	0	0	1	0	1	0	0	0
ADGRE2	30817	symbol	H. sapiens	30817	H. sapiens	ADGRE2	adhesion G protein-coupled receptor E2	GO:0043304 regulation of mast cell degranulation;GO:0033006 regulation of mast cell activation involved in immune response;GO:0033003 regulation of mast cell activation		CD markers; G-protein coupled receptors:Family 2 (B) receptors; Human disease related genes:Skin diseases:Skin and soft tissue diseases; Disease related genes; Potential drug targets; G-protein coupled receptors:GPCRs excl olfactory receptors	Vesicles (Uncertain); Additional: Cytosol				0	0	0	1	0	0	0	0	0	0	0	0	0	0	0	0	0	0	0	0
UNC119	9094	symbol	H. sapiens	9094	H. sapiens	UNC119	unc-119 lipid binding chaperone	GO:2001287 negative regulation of caveolin-mediated endocytosis;GO:1900186 negative regulation of clathrin-dependent endocytosis;GO:2001286 regulation of caveolin-mediated endocytosis		Predicted intracellular proteins; Disease related genes				(M5906)HALLMARK ESTROGEN RESPONSE EARLY	0	0	0	0	0	0	0	0	0	0	0	0	1	0	0	0	0	0	0	0
DBH-AS1	138948	symbol	H. sapiens	138948	H. sapiens	DBH-AS1	DBH antisense RNA 1								0	0	0	0	0	0	0	0	0	0	0	0	0	0	0	0	0	0	0	0
PARK7	11315	symbol	H. sapiens	11315	H. sapiens	PARK7	Parkinsonism associated deglycase	GO:0036471 cellular response to glyoxal;GO:0036526 peptidyl-cysteine deglycation;GO:0036527 peptidyl-arginine deglycation		ENZYME proteins:Hydrolases; Predicted intracellular proteins; Peptidases:Cysteine-type peptidases; Disease related genes; Potential drug targets; Enzymes; Human disease related genes:Nervous system diseases:Neurodegenerative diseases	Cytosol;Nucleoplasm (Supported)	Copper	(M275)PID ALPHA SYNUCLEIN PATHWAY		0	0	0	0	0	0	0	0	0	0	0	1	1	0	1	0	0	0	1	0
JUP	3728	symbol	H. sapiens	3728	H. sapiens	JUP	junction plakoglobin	GO:0071603 endothelial cell-cell adhesion;GO:0002159 desmosome assembly;GO:0071681 cellular response to indole-3-methanol		Cancer-related genes:Candidate cancer biomarkers; Human disease related genes:Congenital malformations:Congenital malformations of the circulatory system; Human disease related genes:Cardiovascular diseases:Cardiac diseases; Disease related genes; Predicted intracellular proteins	Cell Junctions;Plasma membrane (Supported); Additional: Vesicles	Zinc; Zinc acetate	(M184)PID ECADHERIN KERATINOCYTE PATHWAY; (M266)PID NCADHERIN PATHWAY; (M156)PID ECADHERIN NASCENT AJ PATHWAY	(M5915)HALLMARK APICAL JUNCTION; (M5934)HALLMARK XENOBIOTIC METABOLISM; (M5953)HALLMARK KRAS SIGNALING UP	0	0	0	0	1	0	1	1	1	0	0	0	0	0	0	0	1	0	1	0
MRPS24	64951	symbol	H. sapiens	64951	H. sapiens	MRPS24	mitochondrial ribosomal protein S24	GO:0032543 mitochondrial translation;GO:0140053 mitochondrial gene expression;GO:0006412 translation		Ribosomal proteins; Predicted intracellular proteins					0	0	0	0	0	0	0	0	0	0	0	0	0	0	0	0	0	0	0	0
DMPK	1760	symbol	H. sapiens	1760	H. sapiens	DMPK	DM1 protein kinase	GO:0014853 regulation of excitatory postsynaptic membrane potential involved in skeletal muscle contraction;GO:0014852 regulation of skeletal muscle contraction by neural stimulation via neuromuscular junction;GO:0014722 regulation of skeletal muscle contraction by calcium ion signaling	AGC Ser/Thr protein kinase family	Human disease related genes:Musculoskeletal diseases:Muscular diseases; Disease related genes; Potential drug targets; Enzymes; Kinases:AGC Ser/Thr protein kinases; Predicted intracellular proteins; ENZYME proteins:Transferases	Cytosol (Approved); Additional: Vesicles	Bisindolylmaleimide VIII		(M5909)HALLMARK MYOGENESIS	0	0	0	0	0	0	0	0	0	0	0	0	0	0	0	0	0	0	1	0
FLT1	2321	symbol	H. sapiens	2321	H. sapiens	FLT1	fms related receptor tyrosine kinase 1	GO:0036323 vascular endothelial growth factor receptor-1 signaling pathway;GO:1990384 hyaloid vascular plexus regression;GO:0060033 anatomical structure regression	Tyr protein kinase family	FDA approved drug targets:Small molecule drugs; Cancer-related genes:Candidate cancer biomarkers; Predicted secreted proteins; FDA approved drug targets:Biotech drugs; Kinases:Tyr protein kinases; Disease related genes; Enzymes; RAS pathway related proteins; Predicted intracellular proteins; ENZYME proteins:Transferases	Plasma membrane (Supported); Additional: Actin filaments	Sorafenib; Sunitinib; Vatalanib; TG-100801; OSI-930; Denibulin; ABT-869; IMC-1C11; Pazopanib; Axitinib; N-(4-chlorophenyl)-2-[(pyridin-4-ylmethyl)amino]benzamide; Regorafenib; Lenvatinib; Nintedanib; Polaprezinc; Foreskin fibroblast (neonatal); Fostamatinib; Selpercatinib	(M137)PID VEGF VEGFR PATHWAY; (M226)PID VEGFR1 PATHWAY; (M33)PID GLYPICAN 1PATHWAY		1	1	0	1	0	1	1	0	0	0	1	0	1	0	0	0	0	0	0	0
FAM49B	51571	gene_synonym	H. sapiens	51571	H. sapiens	CYRIB	CYFIP related Rac1 interactor B	GO:2000567 regulation of memory T cell activation;GO:2000568 positive regulation of memory T cell activation;GO:2000114 regulation of establishment of cell polarity		Predicted intracellular proteins	Nucleoplasm (Approved); Additional: Cytosol				0	0	0	0	0	0	0	0	0	0	0	0	0	0	0	0	1	0	0	0
XKR6	286046	symbol	H. sapiens	286046	H. sapiens	XKR6	XK related 6	GO:0070782 phosphatidylserine exposure on apoptotic cell surface;GO:0043652 engulfment of apoptotic cell;GO:0017121 plasma membrane phospholipid scrambling			Actin filaments (Approved)				0	0	0	0	0	0	0	0	0	0	0	0	0	0	0	0	0	0	0	0
KCNN2	3781	symbol	H. sapiens	3781	H. sapiens	KCNN2	potassium calcium-activated channel subfamily N member 2	GO:0098914 membrane repolarization during atrial cardiac muscle cell action potential;GO:0099624 atrial cardiac muscle cell membrane repolarization;GO:0086014 atrial cardiac muscle cell action potential		Voltage-gated ion channels:Calcium-Activated Potassium Channels; FDA approved drug targets:Small molecule drugs; Transporters:Transporter channels and pores	Nucleoplasm;Plasma membrane (Uncertain)				0	0	0	0	0	0	0	0	0	0	0	0	0	0	0	1	0	0	1	0
SYNGR2	9144	symbol	H. sapiens	9144	H. sapiens	SYNGR2	synaptogyrin 2	GO:0048499 synaptic vesicle membrane organization;GO:0045055 regulated exocytosis;GO:0006887 exocytosis		Predicted intracellular proteins	Golgi apparatus (Approved)			(M5947)HALLMARK IL2 STAT5 SIGNALING; (M5909)HALLMARK MYOGENESIS	0	0	0	0	0	0	0	0	0	0	0	0	0	0	0	0	0	0	0	0
TINAGL1	64129	symbol	H. sapiens	64129	H. sapiens	TINAGL1	tubulointerstitial nephritis antigen like 1	GO:0016197 endosomal transport;GO:0016192 vesicle-mediated transport;GO:0046907 intracellular transport		Enzymes; Predicted secreted proteins; Predicted intracellular proteins; Peptidases:Cysteine-type peptidases			(M3008)NABA ECM GLYCOPROTEINS; (M5884)NABA CORE MATRISOME; (M5889)NABA MATRISOME		0	0	0	0	0	0	0	0	0	0	0	0	0	0	0	0	0	0	0	0
LOXL2	4017	symbol	H. sapiens	4017	H. sapiens	LOXL2	lysyl oxidase like 2	GO:0018057 peptidyl-lysine oxidation;GO:1902455 negative regulation of stem cell population maintenance;GO:0018158 protein oxidation		Enzymes; Predicted secreted proteins; Predicted intracellular proteins; ENZYME proteins:Oxidoreductases	Nucleoplasm (Enhanced)		(M3468)NABA ECM REGULATORS; (M5885)NABA MATRISOME ASSOCIATED; (M5889)NABA MATRISOME	(M5930)HALLMARK EPITHELIAL MESENCHYMAL TRANSITION	0	1	0	0	0	0	0	0	0	1	0	0	0	0	0	1	0	1	0	0
NEFH	4744	symbol	H. sapiens	4744	H. sapiens	NEFH	neurofilament heavy chain	GO:0048936 peripheral nervous system neuron axonogenesis;GO:0033693 neurofilament bundle assembly;GO:0099185 postsynaptic intermediate filament cytoskeleton organization		Predicted intracellular proteins; Human disease related genes:Nervous system diseases:Neurodegenerative diseases; Disease related genes				(M5951)HALLMARK SPERMATOGENESIS; (M5902)HALLMARK APOPTOSIS	0	0	0	1	0	0	0	0	0	0	0	1	0	1	0	1	0	0	0	0
SOX18	54345	symbol	H. sapiens	54345	H. sapiens	SOX18	SRY-box transcription factor 18	GO:0060214 endocardium formation;GO:0048866 stem cell fate specification;GO:0003348 cardiac endothelial cell differentiation		Human disease related genes:Congenital malformations:Congenital malformations of skin; Transcription factors:Other all-alpha-helical DNA-binding domains; Predicted intracellular proteins; Disease related genes	Nucleoplasm (Approved)				0	1	0	0	1	0	0	0	0	1	0	0	0	0	0	0	0	1	0	0
SBSPON	157869	symbol	H. sapiens	157869	H. sapiens	SBSPON	somatomedin B and thrombospondin type 1 domain containing			Predicted secreted proteins	Vesicles (Approved)		(M3008)NABA ECM GLYCOPROTEINS; (M5884)NABA CORE MATRISOME; (M5889)NABA MATRISOME		0	0	0	0	0	0	0	0	0	0	0	0	0	0	0	0	0	0	0	0
SCN5A	6331	symbol	H. sapiens	6331	H. sapiens	SCN5A	sodium voltage-gated channel alpha subunit 5	GO:0098912 membrane depolarization during atrial cardiac muscle cell action potential;GO:0086048 membrane depolarization during bundle of His cell action potential;GO:0086017 Purkinje myocyte action potential		FDA approved drug targets:Small molecule drugs; Predicted intracellular proteins; Voltage-gated ion channels:Voltage-Gated Sodium Channels; Disease related genes; Transporters:Transporter channels and pores; Human disease related genes:Cardiovascular diseases:Cardiac diseases	Plasma membrane (Supported); Additional: Nucleoli;Nucleoplasm	Indecainide; Phenytoin; Disopyramide; Lidocaine; Mexiletine; Hexylcaine; Cinchocaine; Mephenytoin; Moricizine; Riluzole; Prilocaine; Ethotoin; Benzonatate; Quinidine; Zonisamide; Procainamide; Tocainide; Propafenone; Flecainide; Encainide; Fosphenytoin; Quinidine barbiturate; Ajmaline; Aprindine; Dronedarone; Vernakalant; Isavuconazole			0	0	0	1	0	0	0	0	0	1	1	0	0	0	1	1	1	0	1	0
ZNF518B	85460	symbol	H. sapiens	85460	H. sapiens	ZNF518B	zinc finger protein 518B	GO:0006325 chromatin organization;GO:0051276 chromosome organization;GO:0006357 regulation of transcription by RNA polymerase II		Predicted intracellular proteins; Transcription factors:Zinc-coordinating DNA-binding domains	Nucleoplasm (Approved)				0	0	0	0	0	0	0	0	0	0	0	0	0	0	0	0	0	0	0	0
TIMM17B	10245	symbol	H. sapiens	10245	H. sapiens	TIMM17B	translocase of inner mitochondrial membrane 17B	GO:0030150 protein import into mitochondrial matrix;GO:0044743 protein transmembrane import into intracellular organelle;GO:0065002 intracellular protein transmembrane transport		Predicted intracellular proteins	Microtubules (Approved); Additional: Mitochondria				0	0	0	0	0	0	0	0	0	0	0	0	0	0	0	0	0	0	0	0
RASSF7	8045	symbol	H. sapiens	8045	H. sapiens	RASSF7	Ras association domain family member 7	GO:0070507 regulation of microtubule cytoskeleton organization;GO:0032886 regulation of microtubule-based process;GO:0051493 regulation of cytoskeleton organization		Predicted intracellular proteins	Centriolar satellite (Supported)				1	0	0	0	0	0	0	0	0	0	0	0	0	0	0	0	1	0	0	0
ZNRF1	84937	symbol	H. sapiens	84937	H. sapiens	ZNRF1	zinc and ring finger 1	GO:0070936 protein K48-linked ubiquitination;GO:0000209 protein polyubiquitination;GO:0043161 proteasome-mediated ubiquitin-dependent protein catabolic process		Enzymes; Predicted intracellular proteins; ENZYME proteins:Transferases					0	0	0	0	0	0	0	0	0	0	0	0	0	0	0	0	0	0	0	0
LPCAT4	254531	symbol	H. sapiens	254531	H. sapiens	LPCAT4	lysophosphatidylcholine acyltransferase 4	GO:0036148 phosphatidylglycerol acyl-chain remodeling;GO:0036150 phosphatidylserine acyl-chain remodeling;GO:0036152 phosphatidylethanolamine acyl-chain remodeling		Enzymes; Predicted intracellular proteins; ENZYME proteins:Transferases					0	0	0	0	0	0	0	0	0	0	0	0	0	0	0	0	0	0	0	0
SLC29A2	3177	symbol	H. sapiens	3177	H. sapiens	SLC29A2	solute carrier family 29 member 2	GO:0015854 guanine transport;GO:0035364 thymine transport;GO:0035344 hypoxanthine transport		Transporters:Electrochemical Potential-driven transporters	Nucleoplasm (Uncertain)	Ethanol		(M5928)HALLMARK MYC TARGETS V2; (M5947)HALLMARK IL2 STAT5 SIGNALING	0	0	0	0	0	0	0	0	0	0	0	0	0	0	0	0	0	0	0	0
SMARCB1	6598	symbol	H. sapiens	6598	H. sapiens	SMARCB1	SWI/SNF related, matrix associated, actin dependent regulator of chromatin, subfamily b, member 1	GO:0039692 single stranded viral RNA replication via double stranded DNA intermediate;GO:1900110 negative regulation of histone H3-K9 dimethylation;GO:1902659 regulation of glucose mediated signaling pathway		Human disease related genes:Other diseases:Mental and behavioural disorders; Cancer-related genes:Mutated cancer genes; Human disease related genes:Cancers:Cancers of eye, brain, and central nervous system; Predicted intracellular proteins; Human disease related genes:Congenital malformations:Other congenital malformations; Disease related genes; Human disease related genes:Other diseases:Others	Nucleoplasm (Supported); Additional: Nucleoli fibrillar center		(M119)PID ERB GENOMIC PATHWAY; (M279)PID RB 1PATHWAY		0	1	0	0	0	0	0	0	0	0	0	0	0	0	0	0	0	1	0	0
TRPC6	7225	symbol	H. sapiens	7225	H. sapiens	TRPC6	transient receptor potential cation channel subfamily C member 6	GO:0006828 manganese ion transport;GO:0000041 transition metal ion transport;GO:0032414 positive regulation of ion transmembrane transporter activity		Voltage-gated ion channels:Transient Receptor Potential Channels; Disease related genes; Potential drug targets; Human disease related genes:Urinary system diseases:Kidney diseases; Transporters:Transporter channels and pores			(M193)PID NEPHRIN NEPH1 PATHWAY; (M233)PID EPO PATHWAY; (M238)PID THROMBIN PAR1 PATHWAY		0	0	0	1	0	0	0	0	0	0	0	0	0	0	0	0	0	0	0	0
KCNG2	26251	symbol	H. sapiens	26251	H. sapiens	KCNG2	potassium voltage-gated channel modifier subfamily G member 2	GO:0071805 potassium ion transmembrane transport;GO:0006813 potassium ion transport;GO:0051260 protein homooligomerization		Voltage-gated ion channels:Voltage-Gated Potassium Channels					0	0	0	0	0	0	0	0	0	0	0	0	0	0	0	0	0	0	1	0
KRT17	3872	symbol	H. sapiens	3872	H. sapiens	KRT17	keratin 17	GO:0051798 positive regulation of hair follicle development;GO:0051797 regulation of hair follicle development;GO:0042634 regulation of hair cycle		Human disease related genes:Congenital malformations:Congenital malformations of skin; Predicted intracellular proteins; Disease related genes; Cancer-related genes:Candidate cancer biomarkers	Intermediate filaments (Enhanced)		(M115)PID REG GR PATHWAY	(M5939)HALLMARK P53 PATHWAY	0	1	0	0	1	0	0	0	0	0	0	1	0	0	0	1	0	0	0	0
NAT14	57106	symbol	H. sapiens	57106	H. sapiens	NAT14	N-acetyltransferase 14 (putative)	GO:0006352 DNA-templated transcription, initiation;GO:0006351 transcription, DNA-templated;GO:0097659 nucleic acid-templated transcription		Predicted intracellular proteins	Mitochondria (Approved)				0	0	0	0	0	0	0	0	0	0	0	0	0	0	0	0	0	0	0	0
RNF216	54476	symbol	H. sapiens	54476	H. sapiens	RNF216	ring finger protein 216	GO:0032480 negative regulation of type I interferon production;GO:0050691 regulation of defense response to virus by host;GO:0032648 regulation of interferon-beta production		Predicted intracellular proteins; Disease related genes; Potential drug targets; Enzymes; Human disease related genes:Nervous system diseases:Neurodegenerative diseases; ENZYME proteins:Transferases	Cytosol (Supported); Additional: Nucleoplasm				0	0	0	0	0	0	0	0	0	0	0	0	0	0	0	0	0	0	0	0
CHD3	1107	symbol	H. sapiens	1107	H. sapiens	CHD3	chromodomain helicase DNA binding protein 3	GO:0016575 histone deacetylation;GO:0006476 protein deacetylation;GO:0035601 protein deacylation		ENZYME proteins:Hydrolases; Disease related genes; Potential drug targets; Enzymes; Predicted intracellular proteins	Nucleoli;Nucleoplasm (Supported); Additional: Centriolar satellite		(M101)PID HDAC CLASSI PATHWAY		0	0	0	0	0	0	0	0	0	0	0	0	0	0	0	0	0	0	0	0
ACTR3B	57180	symbol	H. sapiens	57180	H. sapiens	ACTR3B	actin related protein 3B	GO:0008150 biological_process		Predicted intracellular proteins					0	0	0	0	0	0	0	0	0	0	0	0	0	0	0	0	0	0	0	0
ITGA7	3679	symbol	H. sapiens	3679	H. sapiens	ITGA7	integrin subunit alpha 7	GO:0034113 heterotypic cell-cell adhesion;GO:0033627 cell adhesion mediated by integrin;GO:0035987 endodermal cell differentiation		Transporters:Accessory Factors Involved in Transport; Human disease related genes:Musculoskeletal diseases:Muscular diseases; Disease related genes; Potential drug targets; Predicted intracellular proteins	Plasma membrane (Approved); Additional: Nuclear speckles;Vesicles		(M47)PID INTEGRIN CS PATHWAY; (M67)PID ARF6 TRAFFICKING PATHWAY; (M18)PID INTEGRIN1 PATHWAY	(M5905)HALLMARK ADIPOGENESIS; (M5909)HALLMARK MYOGENESIS	0	1	1	0	0	1	0	0	1	1	0	0	0	0	0	0	0	0	0	0
WWC2-AS2	152641	symbol	H. sapiens	152641	H. sapiens	WWC2-AS2	WWC2 antisense RNA 2								0	0	0	0	0	0	0	0	0	0	0	0	0	0	0	0	0	0	0	0
MMAB	326625	symbol	H. sapiens	326625	H. sapiens	MMAB	metabolism of cobalamin associated B	GO:0009235 cobalamin metabolic process;GO:0033013 tetrapyrrole metabolic process;GO:0006767 water-soluble vitamin metabolic process		Human disease related genes:Congenital disorders of metabolism:Congenital disorders of amino acid metabolism; Disease related genes; Potential drug targets; Enzymes; Predicted intracellular proteins; ENZYME proteins:Transferases	Mitochondria (Approved)				0	0	0	0	0	0	0	0	0	0	0	0	0	0	0	0	0	0	0	0
BIN1	274	symbol	H. sapiens	274	H. sapiens	BIN1	bridging integrator 1	GO:0106135 negative regulation of cardiac muscle cell contraction;GO:1903946 negative regulation of ventricular cardiac muscle cell action potential;GO:0060988 lipid tube assembly		Predicted intracellular proteins; Human disease related genes:Musculoskeletal diseases:Muscular diseases; Disease related genes	Cytosol (Supported)		(M67)PID ARF6 TRAFFICKING PATHWAY; (M19)PID P73PATHWAY	(M5893)HALLMARK MITOTIC SPINDLE; (M5909)HALLMARK MYOGENESIS	0	0	1	0	0	0	0	0	0	0	0	0	0	0	1	0	1	0	1	0
TSPAN14	81619	symbol	H. sapiens	81619	H. sapiens	TSPAN14	tetraspanin 14	GO:0045747 positive regulation of Notch signaling pathway;GO:0008593 regulation of Notch signaling pathway;GO:0072659 protein localization to plasma membrane		Transporters:Accessory Factors Involved in Transport	Vesicles (Supported)				0	0	0	0	0	0	0	0	0	0	0	0	0	0	0	0	0	0	0	0
RPL13AP20	387841	symbol	H. sapiens	387841	H. sapiens	RPL13AP20	ribosomal protein L13a pseudogene 20								0	0	0	0	0	0	0	0	0	0	0	0	0	0	0	0	0	0	0	0
FBXO2	26232	symbol	H. sapiens	26232	H. sapiens	FBXO2	F-box protein 2	GO:0006516 glycoprotein catabolic process;GO:0031146 SCF-dependent proteasomal ubiquitin-dependent protein catabolic process;GO:0030433 ubiquitin-dependent ERAD pathway		Predicted intracellular proteins	Cytosol;Nucleoplasm (Approved)				0	0	0	0	0	0	0	0	0	0	0	0	0	0	0	0	0	0	0	0
MOV10	4343	symbol	H. sapiens	4343	H. sapiens	MOV10	Mov10 RISC complex RNA helicase	GO:0010525 regulation of transposition, RNA-mediated;GO:0010526 negative regulation of transposition, RNA-mediated;GO:0035279 mRNA destabilization-mediated gene silencing by miRNA		Enzymes; ENZYME proteins:Hydrolases; Predicted intracellular proteins	Cytosol (Approved)			(M5911)HALLMARK INTERFERON ALPHA RESPONSE	0	0	0	0	0	0	0	0	0	0	0	0	0	0	1	0	0	0	0	0
CPA4	51200	symbol	H. sapiens	51200	H. sapiens	CPA4	carboxypeptidase A4	GO:0016573 histone acetylation;GO:0018393 internal peptidyl-lysine acetylation;GO:0006475 internal protein amino acid acetylation		Enzymes; Predicted secreted proteins; Predicted intracellular proteins; Peptidases:Metallopeptidases	Nucleoplasm (Approved); Additional: Centrosome;Cytosol				0	0	0	0	0	0	0	0	0	0	0	0	0	0	0	0	0	0	0	0
MLLT11	10962	symbol	H. sapiens	10962	H. sapiens	MLLT11	MLLT11 transcription factor 7 cofactor	GO:0051901 positive regulation of mitochondrial depolarization;GO:1904181 positive regulation of membrane depolarization;GO:0051900 regulation of mitochondrial depolarization		Predicted intracellular proteins; Disease related genes; Cancer-related genes:Candidate cancer biomarkers	Cytosol;Nucleoplasm (Supported)			(M5924)HALLMARK MTORC1 SIGNALING	0	0	0	0	0	0	0	0	0	0	0	0	0	0	0	0	0	0	1	0
TAGLN	6876	symbol	H. sapiens	6876	H. sapiens	TAGLN	transgelin	GO:0007517 muscle organ development;GO:0061061 muscle structure development;GO:0030855 epithelial cell differentiation		Predicted intracellular proteins; Cancer-related genes:Candidate cancer biomarkers	Microtubules;Mitochondria (Approved); Additional: Cytosol	Artenimol	(M186)PID PDGFRB PATHWAY	(M5909)HALLMARK MYOGENESIS; (M5930)HALLMARK EPITHELIAL MESENCHYMAL TRANSITION	0	0	1	0	1	0	0	0	0	0	0	0	0	0	0	0	0	0	0	0
GCAT	23464	symbol	H. sapiens	23464	H. sapiens	GCAT	glycine C-acetyltransferase	GO:0019518 L-threonine catabolic process to glycine;GO:0006567 threonine catabolic process;GO:0006566 threonine metabolic process		Enzymes; Predicted intracellular proteins; ENZYME proteins:Transferases	Nucleoplasm (Supported); Additional: Mitochondria;Nuclear speckles	Pyridoxal phosphate; Glycine			0	0	0	0	0	0	0	0	0	0	0	0	0	0	0	0	0	0	0	0
SCAMP3	10067	symbol	H. sapiens	10067	H. sapiens	SCAMP3	secretory carrier membrane protein 3	GO:0006892 post-Golgi vesicle-mediated transport;GO:0048193 Golgi vesicle transport;GO:0015031 protein transport		Transporters:Accessory Factors Involved in Transport	Vesicles (Supported)			(M5910)HALLMARK PROTEIN SECRETION	0	0	0	0	0	0	0	0	0	0	0	0	0	0	0	0	0	0	0	0
SYDE2	84144	symbol	H. sapiens	84144	H. sapiens	SYDE2	synapse defective Rho GTPase homolog 2	GO:0090630 activation of GTPase activity;GO:0043547 positive regulation of GTPase activity;GO:0051056 regulation of small GTPase mediated signal transduction		Predicted intracellular proteins	Golgi apparatus;Nucleoli;Nucleoli rim (Approved)				0	0	0	0	0	0	0	0	0	0	0	0	0	0	0	0	0	0	0	0
SLC27A5	10998	symbol	H. sapiens	10998	H. sapiens	SLC27A5	solute carrier family 27 member 5	GO:0006642 triglyceride mobilization;GO:0015911 long-chain fatty acid import across plasma membrane;GO:0046951 ketone body biosynthetic process		Enzymes; ENZYME proteins:Ligase; Predicted intracellular proteins; Transporters				(M5948)HALLMARK BILE ACID METABOLISM	0	0	0	0	0	0	0	0	0	0	0	0	0	0	0	0	0	0	0	0
CYTIP	9595	symbol	H. sapiens	9595	H. sapiens	CYTIP	cytohesin 1 interacting protein	GO:0030155 regulation of cell adhesion;GO:0050794 regulation of cellular process;GO:0050789 regulation of biological process		Predicted intracellular proteins	Cytosol (Approved); Additional: Nucleoplasm				0	0	0	0	0	0	0	0	0	0	0	0	0	0	0	0	0	0	0	0
TFAP2A	7020	symbol	H. sapiens	7020	H. sapiens	TFAP2A	transcription factor AP-2 alpha	GO:0003409 optic cup structural organization;GO:0021622 oculomotor nerve morphogenesis;GO:0021623 oculomotor nerve formation		Human disease related genes:Congenital malformations:Congenital malformations of face and neck; Transcription factors:Basic domains; Predicted intracellular proteins; Disease related genes	Nucleoplasm (Enhanced)		(M220)PID CASPASE PATHWAY		0	1	0	0	0	0	0	1	1	1	0	0	0	0	1	0	0	0	0	1
RECQL5	9400	symbol	H. sapiens	9400	H. sapiens	RECQL5	RecQ like helicase 5	GO:0072757 cellular response to camptothecin;GO:1901563 response to camptothecin;GO:1990414 replication-born double-strand break repair via sister chromatid exchange		Enzymes; ENZYME proteins:Hydrolases; Predicted intracellular proteins	Nucleoplasm (Supported); Additional: Cytosol				0	0	0	0	0	0	0	0	0	0	0	0	0	0	0	0	0	0	0	0
HS6ST1	9394	symbol	H. sapiens	9394	H. sapiens	HS6ST1	heparan sulfate 6-O-sulfotransferase 1	GO:0015015 heparan sulfate proteoglycan biosynthetic process, enzymatic modification;GO:0060716 labyrinthine layer blood vessel development;GO:0015012 heparan sulfate proteoglycan biosynthetic process		Human disease related genes:Endocrine and metabolic diseases:Hypothalamus and pituitary gland diseases; Predicted intracellular proteins; Disease related genes	Nucleoplasm (Approved)				0	1	0	0	0	0	0	0	0	0	0	0	0	0	0	0	0	1	0	0
B9D1	27077	symbol	H. sapiens	27077	H. sapiens	B9D1	B9 domain containing 1	GO:0060563 neuroepithelial cell differentiation;GO:0042733 embryonic digit morphogenesis;GO:0007224 smoothened signaling pathway		Human disease related genes:Congenital malformations:Congenital malformations of the nervous system; Predicted intracellular proteins; Disease related genes; Human disease related genes:Congenital malformations:Congenital malformations of the urinary system					0	1	0	0	1	0	0	0	0	0	1	0	0	0	0	0	0	1	0	0
TNIP1	10318	symbol	H. sapiens	10318	H. sapiens	TNIP1	TNFAIP3 interacting protein 1	GO:1903003 positive regulation of protein deubiquitination;GO:0090085 regulation of protein deubiquitination;GO:0002755 MyD88-dependent toll-like receptor signaling pathway		Human disease related genes:Skin diseases:Skin and soft tissue diseases; Predicted intracellular proteins; Human disease related genes:Immune system diseases:Allergies and autoimmune diseases	Nucleoplasm (Supported); Additional: Cytosol			(M5890)HALLMARK TNFA SIGNALING VIA NFKB	0	0	0	0	0	0	0	0	0	0	0	0	0	0	0	0	0	0	0	0
PEAR1	375033	symbol	H. sapiens	375033	H. sapiens	PEAR1	platelet endothelial aggregation receptor 1	GO:0043654 recognition of apoptotic cell;GO:0014065 phosphatidylinositol 3-kinase signaling;GO:0043491 protein kinase B signaling		Predicted intracellular proteins	Cell Junctions;Nucleoplasm (Approved); Additional: Centrosome				0	0	0	0	0	0	0	0	0	0	0	0	0	0	0	0	0	0	0	0
NDST3	9348	symbol	H. sapiens	9348	H. sapiens	NDST3	N-deacetylase and N-sulfotransferase 3	GO:0015014 heparan sulfate proteoglycan biosynthetic process, polysaccharide chain biosynthetic process;GO:0030210 heparin biosynthetic process;GO:0030202 heparin metabolic process		Enzymes; Predicted intracellular proteins; ENZYME proteins:Transferases				(M5937)HALLMARK GLYCOLYSIS	0	0	0	0	0	0	0	0	0	0	0	0	0	0	0	0	0	0	0	0
LMO4	8543	symbol	H. sapiens	8543	H. sapiens	LMO4	LIM domain only 4	GO:0021527 spinal cord association neuron differentiation;GO:0042659 regulation of cell fate specification;GO:0021514 ventral spinal cord interneuron differentiation		Predicted intracellular proteins	Nucleoplasm (Supported); Additional: Midbody ring		(M183)PID IL6 7 PATHWAY; (M100)PID SHP2 PATHWAY; (M200)PID ERA GENOMIC PATHWAY		0	1	0	0	0	0	0	0	0	1	0	0	1	0	0	0	0	0	0	1
SH3BP1	23616	symbol	H. sapiens	23616	H. sapiens	SH3BP1	SH3 domain binding protein 1	GO:0045198 establishment of epithelial cell apical/basal polarity;GO:0035020 regulation of Rac protein signal transduction;GO:0030859 polarized epithelial cell differentiation		Predicted intracellular proteins	Cytosol (Approved)				0	1	0	0	1	0	0	0	0	0	0	0	0	0	0	1	1	0	0	0
RNF208	727800	symbol	H. sapiens	727800	H. sapiens	RNF208	ring finger protein 208	GO:0051865 protein autoubiquitination;GO:0016567 protein ubiquitination;GO:0032446 protein modification by small protein conjugation		Predicted intracellular proteins	Nucleoplasm (Enhanced)				0	0	0	0	0	0	0	0	0	0	0	0	0	0	0	0	0	0	0	0
SH3TC1	54436	symbol	H. sapiens	54436	H. sapiens	SH3TC1	SH3 domain and tetratricopeptide repeats 1	GO:0008150 biological_process		Predicted intracellular proteins	Nucleoli;Nucleoli rim (Approved); Additional: Cytosol;Nucleoplasm				0	0	0	0	0	0	0	0	0	0	0	0	0	0	0	0	0	0	0	0
MGAT3	4248	symbol	H. sapiens	4248	H. sapiens	MGAT3	beta-1,4-mannosyl-glycoprotein 4-beta-N-acetylglucosaminyltransferase	GO:1904351 negative regulation of protein catabolic process in the vacuole;GO:1905166 negative regulation of lysosomal protein catabolic process;GO:1902965 regulation of protein localization to early endosome		Enzymes; Predicted intracellular proteins; ENZYME proteins:Transferases			(M232)PID ECADHERIN STABILIZATION PATHWAY		0	0	0	0	0	0	0	0	0	0	0	0	0	0	0	0	0	0	0	0
KCNH1	3756	symbol	H. sapiens	3756	H. sapiens	KCNH1	potassium voltage-gated channel subfamily H member 1	GO:0007520 myoblast fusion;GO:0000768 syncytium formation by plasma membrane fusion;GO:0140253 cell-cell fusion		Voltage-gated ion channels:Voltage-Gated Potassium Channels; Human disease related genes:Congenital malformations:Other congenital malformations; Disease related genes; Potential drug targets; Transporters:Transporter channels and pores; Predicted intracellular proteins	Vesicles (Supported)	Imipramine; Astemizole		(M5909)HALLMARK MYOGENESIS	0	0	1	0	0	0	0	0	0	0	0	0	0	0	0	0	0	0	1	0
HTR1D	3352	symbol	H. sapiens	3352	H. sapiens	HTR1D	5-hydroxytryptamine receptor 1D	GO:0014827 intestine smooth muscle contraction;GO:0014831 gastro-intestinal system smooth muscle contraction;GO:0007198 adenylate cyclase-inhibiting serotonin receptor signaling pathway		G-protein coupled receptors:GPCRs excl olfactory receptors; G-protein coupled receptors:Serotonin receptors; FDA approved drug targets:Small molecule drugs; Human disease related genes:Other diseases:Mental and behavioural disorders		Eletriptan; Ziprasidone; Cabergoline; Zolmitriptan; Dihydroergotamine; Amitriptyline; Clozapine; Loxapine; Lisuride; Sumatriptan; Ergotamine; Apomorphine; Trimipramine; Risperidone; Almotriptan; Naratriptan; Rizatriptan; Frovatriptan; Pergolide; Bromocriptine; Quetiapine; Aripiprazole; Paliperidone; Yohimbine; Lofexidine; NXN-188; Pizotifen; Aripiprazole lauroxil		(M5956)HALLMARK KRAS SIGNALING DN	0	0	0	0	0	0	0	0	0	0	0	0	0	0	0	0	1	0	0	0
NFKB2	4791	symbol	H. sapiens	4791	H. sapiens	NFKB2	nuclear factor kappa B subunit 2	GO:0002268 follicular dendritic cell differentiation;GO:0002266 follicular dendritic cell activation;GO:0002467 germinal center formation		Human disease related genes:Immune system diseases:Primary immunodeficiency; FDA approved drug targets:Small molecule drugs; Transcription factors:Immunoglobulin fold; Cancer-related genes:Candidate cancer biomarkers; Disease related genes; Predicted intracellular proteins	Cytosol (Approved); Additional: Nucleoplasm	Donepezil; Glucosamine; HE3286; P54; NOX-700; SGN-30; Custirsen; NF-kappaB Decoy; Andrographolide; Glycyrrhizic acid; Fish oil; SC-236	(M12705)SIG CD40PATHWAYMAP; (M54)PID IL12 2PATHWAY	(M5890)HALLMARK TNFA SIGNALING VIA NFKB	0	0	0	0	0	0	0	1	1	0	0	0	0	0	0	0	0	0	0	0
IGFBP7-AS1	255130	symbol	H. sapiens	255130	H. sapiens	IGFBP7-AS1	IGFBP7 antisense RNA 1								0	0	0	0	0	0	0	0	0	0	0	0	0	0	0	0	0	0	0	0
FLRT1	23769	symbol	H. sapiens	23769	H. sapiens	FLRT1	fibronectin leucine rich transmembrane protein 1	GO:0008543 fibroblast growth factor receptor signaling pathway;GO:1990138 neuron projection extension;GO:0044344 cellular response to fibroblast growth factor stimulus							0	0	0	1	0	0	1	0	0	0	0	0	0	0	0	0	0	0	0	0
CARD10	29775	symbol	H. sapiens	29775	H. sapiens	CARD10	caspase recruitment domain family member 10	GO:0007250 activation of NF-kappaB-inducing kinase activity;GO:0038061 NIK/NF-kappaB signaling;GO:0090051 negative regulation of cell migration involved in sprouting angiogenesis		Predicted intracellular proteins	Intermediate filaments;Vesicles (Approved); Additional: Cytosol				0	0	0	0	0	0	0	0	0	0	0	0	1	0	0	0	0	0	0	0
NDUFA6	4700	symbol	H. sapiens	4700	H. sapiens	NDUFA6	NADH:ubiquinone oxidoreductase subunit A6	GO:0006120 mitochondrial electron transport, NADH to ubiquinone;GO:0010257 NADH dehydrogenase complex assembly;GO:0032981 mitochondrial respiratory chain complex I assembly		Predicted intracellular proteins; Disease related genes; Human disease related genes:Congenital disorders of metabolism:Mitochondrial diseases		NADH		(M5938)HALLMARK REACTIVE OXYGEN SPECIES PATHWAY; (M5936)HALLMARK OXIDATIVE PHOSPHORYLATION	0	0	0	0	0	0	0	0	0	0	0	1	0	0	0	0	0	0	0	0
TMEM178B	100507421	symbol	H. sapiens	100507421	H. sapiens	TMEM178B	transmembrane protein 178B				Vesicles (Approved); Additional: Nucleoli				0	0	0	0	0	0	0	0	0	0	0	0	0	0	0	0	0	0	0	0
BRD4	23476	symbol	H. sapiens	23476	H. sapiens	BRD4	bromodomain containing 4	GO:1901407 regulation of phosphorylation of RNA polymerase II C-terminal domain;GO:2001255 positive regulation of histone H3-K36 trimethylation;GO:0000416 positive regulation of histone H3-K36 methylation		Predicted intracellular proteins; Cancer-related genes; Disease related genes	Nucleoplasm (Enhanced)		(M7955)SIG INSULIN RECEPTOR PATHWAY IN CARDIAC MYOCYTES		0	0	0	0	0	0	0	0	0	0	0	0	0	0	0	0	0	0	0	0
RAB11FIP4	84440	symbol	H. sapiens	84440	H. sapiens	RAB11FIP4	RAB11 family interacting protein 4	GO:0032456 endocytic recycling;GO:0032465 regulation of cytokinesis;GO:0098876 vesicle-mediated transport to the plasma membrane		Predicted intracellular proteins					0	0	0	0	0	0	0	0	0	0	0	0	0	0	0	0	0	0	0	0
ELAVL2	1993	symbol	H. sapiens	1993	H. sapiens	ELAVL2	ELAV like RNA binding protein 2	GO:0006355 regulation of transcription, DNA-templated;GO:1903506 regulation of nucleic acid-templated transcription;GO:2001141 regulation of RNA biosynthetic process		Predicted intracellular proteins	Nucleoplasm (Approved); Additional: Cytosol				0	0	0	0	0	0	0	0	0	0	0	0	0	0	0	0	0	0	0	0
GATSL3	652968	gene_synonym	H. sapiens	652968	H. sapiens	CASTOR1	cytosolic arginine sensor for mTORC1 subunit 1	GO:1903576 response to L-arginine;GO:1903577 cellular response to L-arginine;GO:1904262 negative regulation of TORC1 signaling		Predicted intracellular proteins					0	0	0	0	0	0	0	0	0	0	0	0	0	0	0	0	0	0	0	0
MRPS18A	55168	symbol	H. sapiens	55168	H. sapiens	MRPS18A	mitochondrial ribosomal protein S18A	GO:0032543 mitochondrial translation;GO:0140053 mitochondrial gene expression;GO:0006412 translation		Ribosomal proteins; Predicted intracellular proteins					0	0	0	0	0	0	0	0	0	0	0	0	0	0	0	0	0	0	0	0
DBH	1621	symbol	H. sapiens	1621	H. sapiens	DBH	dopamine beta-hydroxylase	GO:0042309 homoiothermy;GO:0006589 octopamine biosynthetic process;GO:0046333 octopamine metabolic process		FDA approved drug targets:Small molecule drugs; Human disease related genes:Nervous system diseases:Other nervous and sensory system diseases; ENZYME proteins:Oxidoreductases; Disease related genes; Enzymes; Predicted intracellular proteins	Vesicles (Supported); Additional: Endoplasmic reticulum	Ascorbic acid; Disulfiram; Dopamine			0	0	0	0	0	0	0	0	0	0	0	0	0	0	0	0	1	0	1	0
LHX9	56956	symbol	H. sapiens	56956	H. sapiens	LHX9	LIM homeobox 9	GO:0097380 dorsal spinal cord interneuron anterior axon guidance;GO:0097378 dorsal spinal cord interneuron axon guidance;GO:0035262 gonad morphogenesis		Transcription factors:Helix-turn-helix domains; Predicted intracellular proteins	Nucleoplasm (Approved)			(M5937)HALLMARK GLYCOLYSIS	0	0	0	1	0	0	0	0	0	0	0	0	0	0	0	0	0	0	0	0

## Sheet: Enrichment
GroupID	Category	Term	Description	LogP	Log(q-value)	InTerm_InList	Genes	Symbols
1_Summary	WikiPathways	WP5087	Malignant pleural mesothelioma	-12.8588	-8.51209	27/447	72,467,1001,1022,1282,1284,1969,2250,2321,2535,3691,4041,4192,4217,4293,4803,4915,5154,5328,6513,7004,7005,7482,8045,8463,8994,83439	ACTG2,ATF3,CDH3,CDK7,COL4A1,COL4A2,EPHA2,FGF5,FLT1,FZD2,ITGB4,LRP5,MDK,MAP3K5,MAP3K9,NGF,NTRK2,PDGFA,PLAU,SLC2A1,TEAD4,TEAD3,WNT2B,RASSF7,TEAD2,LIMD1,TCF7L1
1_Member	WikiPathways	WP5087	Malignant pleural mesothelioma	-12.8588	-8.51209	27/447	72,467,1001,1022,1282,1284,1969,2250,2321,2535,3691,4041,4192,4217,4293,4803,4915,5154,5328,6513,7004,7005,7482,8045,8463,8994,83439	ACTG2,ATF3,CDH3,CDK7,COL4A1,COL4A2,EPHA2,FGF5,FLT1,FZD2,ITGB4,LRP5,MDK,MAP3K5,MAP3K9,NGF,NTRK2,PDGFA,PLAU,SLC2A1,TEAD4,TEAD3,WNT2B,RASSF7,TEAD2,LIMD1,TCF7L1
2_Summary	GO Biological Processes	GO:0048729	tissue morphogenesis	-11.4452	-7.39955	28/554	72,182,388,652,1282,1741,1969,2303,2304,2535,2637,3691,3872,4041,4488,6608,6664,6722,7020,7134,8463,8543,9355,23616,51301,54345,84446,388585,1284,1907,2321,3976,4017,4915,5154,9394,23670,27077,51421,128240,201294,1749,3679,10586,60529,357,5158,7482,11020,7004,7005,5423,6598,64359	ACTG2,JAG1,RHOB,BMP4,COL4A1,DLG3,EPHA2,FOXC2,FOXE1,FZD2,GBX2,ITGB4,KRT17,LRP5,MSX2,SMO,SOX11,SRF,TFAP2A,TNNC1,TEAD2,LMO4,LHX2,SH3BP1,GCNT4,SOX18,BRSK1,HES5,COL4A2,EDN2,FLT1,LIF,LOXL2,NTRK2,PDGFA,HS6ST1,CEMIP2,B9D1,AMOTL2,NAXE,UNC13D,DLX5,ITGA7,MAB21L2,ALX4,SHROOM2,PDE6B,WNT2B,IFT27,TEAD4,TEAD3,POLB,SMARCB1,NXN
2_Member	GO Biological Processes	GO:0048729	tissue morphogenesis	-11.4452	-7.39955	28/554	72,182,388,652,1282,1741,1969,2303,2304,2535,2637,3691,3872,4041,4488,6608,6664,6722,7020,7134,8463,8543,9355,23616,51301,54345,84446,388585	ACTG2,JAG1,RHOB,BMP4,COL4A1,DLG3,EPHA2,FOXC2,FOXE1,FZD2,GBX2,ITGB4,KRT17,LRP5,MSX2,SMO,SOX11,SRF,TFAP2A,TNNC1,TEAD2,LMO4,LHX2,SH3BP1,GCNT4,SOX18,BRSK1,HES5
2_Member	GO Biological Processes	GO:0002009	morphogenesis of an epithelium	-10.4937	-6.74905	24/443	182,388,652,1282,1741,1969,2303,2304,2535,2637,3872,4041,4488,6608,6664,6722,7020,8463,8543,9355,23616,54345,84446,388585	JAG1,RHOB,BMP4,COL4A1,DLG3,EPHA2,FOXC2,FOXE1,FZD2,GBX2,KRT17,LRP5,MSX2,SMO,SOX11,SRF,TFAP2A,TEAD2,LMO4,LHX2,SH3BP1,SOX18,BRSK1,HES5
2_Member	GO Biological Processes	GO:0001944	vasculature development	-9.70664	-6.16499	25/526	182,388,652,1282,1284,1907,1969,2303,2321,2637,3976,4017,4041,4915,5154,6608,6722,8463,9394,23670,27077,51421,54345,128240,201294	JAG1,RHOB,BMP4,COL4A1,COL4A2,EDN2,EPHA2,FOXC2,FLT1,GBX2,LIF,LOXL2,LRP5,NTRK2,PDGFA,SMO,SRF,TEAD2,HS6ST1,CEMIP2,B9D1,AMOTL2,SOX18,NAXE,UNC13D
2_Member	GO Biological Processes	GO:0035239	tube morphogenesis	-9.66658	-6.16499	28/661	182,388,652,1282,1284,1907,1969,2303,2321,2535,2637,4017,4041,4488,4915,5154,6608,6664,6722,8463,8543,9355,9394,23670,51421,54345,128240,388585	JAG1,RHOB,BMP4,COL4A1,COL4A2,EDN2,EPHA2,FOXC2,FLT1,FZD2,GBX2,LOXL2,LRP5,MSX2,NTRK2,PDGFA,SMO,SOX11,SRF,TEAD2,LMO4,LHX2,HS6ST1,CEMIP2,AMOTL2,SOX18,NAXE,HES5
2_Member	GO Biological Processes	GO:0048514	blood vessel morphogenesis	-9.40522	-5.96163	22/419	182,388,652,1282,1284,1907,1969,2303,2321,2637,4017,4041,4915,5154,6608,6722,8463,9394,23670,51421,54345,128240	JAG1,RHOB,BMP4,COL4A1,COL4A2,EDN2,EPHA2,FOXC2,FLT1,GBX2,LOXL2,LRP5,NTRK2,PDGFA,SMO,SRF,TEAD2,HS6ST1,CEMIP2,AMOTL2,SOX18,NAXE
2_Member	GO Biological Processes	GO:0048598	embryonic morphogenesis	-8.89472	-5.50228	25/576	652,1284,1749,1969,2303,2304,2321,2535,2637,3679,3691,4041,4488,6608,6664,6722,7020,8463,8543,9355,10586,27077,54345,60529,388585	BMP4,COL4A2,DLX5,EPHA2,FOXC2,FOXE1,FLT1,FZD2,GBX2,ITGA7,ITGB4,LRP5,MSX2,SMO,SOX11,SRF,TFAP2A,TEAD2,LMO4,LHX2,MAB21L2,B9D1,SOX18,ALX4,HES5
2_Member	GO Biological Processes	GO:0043010	camera-type eye development	-8.30031	-5.01469	18/318	182,357,652,1282,1969,2303,2321,4041,4915,5158,6664,6722,7020,7482,9355,10586,27077,388585	JAG1,SHROOM2,BMP4,COL4A1,EPHA2,FOXC2,FLT1,LRP5,NTRK2,PDE6B,SOX11,SRF,TFAP2A,WNT2B,LHX2,MAB21L2,B9D1,HES5
2_Member	GO Biological Processes	GO:0001525	angiogenesis	-8.23667	-5.00393	18/321	182,388,652,1282,1284,1907,1969,2303,2321,2637,4017,5154,6722,9394,23670,51421,54345,128240	JAG1,RHOB,BMP4,COL4A1,COL4A2,EDN2,EPHA2,FOXC2,FLT1,GBX2,LOXL2,PDGFA,SRF,HS6ST1,CEMIP2,AMOTL2,SOX18,NAXE
2_Member	GO Biological Processes	GO:0001568	blood vessel development	-7.94835	-4.8316	22/503	182,388,652,1282,1284,1907,1969,2303,2321,2637,4017,4041,4915,5154,6608,6722,8463,9394,23670,51421,54345,128240	JAG1,RHOB,BMP4,COL4A1,COL4A2,EDN2,EPHA2,FOXC2,FLT1,GBX2,LOXL2,LRP5,NTRK2,PDGFA,SMO,SRF,TEAD2,HS6ST1,CEMIP2,AMOTL2,SOX18,NAXE
2_Member	GO Biological Processes	GO:0007423	sensory organ development	-7.90846	-4.81705	23/551	182,357,652,1282,1749,1969,2303,2321,2535,2637,4041,4915,5154,5158,6664,6722,7020,7482,9355,10586,11020,27077,388585	JAG1,SHROOM2,BMP4,COL4A1,DLX5,EPHA2,FOXC2,FLT1,FZD2,GBX2,LRP5,NTRK2,PDGFA,PDE6B,SOX11,SRF,TFAP2A,WNT2B,LHX2,MAB21L2,IFT27,B9D1,HES5
2_Member	GO Biological Processes	GO:0060562	epithelial tube morphogenesis	-7.73041	-4.66248	17/307	388,652,1282,1969,2303,2535,2637,4041,4488,6608,6664,6722,8463,8543,9355,54345,388585	RHOB,BMP4,COL4A1,EPHA2,FOXC2,FZD2,GBX2,LRP5,MSX2,SMO,SOX11,SRF,TEAD2,LMO4,LHX2,SOX18,HES5
2_Member	GO Biological Processes	GO:0001654	eye development	-7.39765	-4.39339	18/364	182,357,652,1282,1969,2303,2321,4041,4915,5158,6664,6722,7020,7482,9355,10586,27077,388585	JAG1,SHROOM2,BMP4,COL4A1,EPHA2,FOXC2,FLT1,LRP5,NTRK2,PDE6B,SOX11,SRF,TFAP2A,WNT2B,LHX2,MAB21L2,B9D1,HES5
2_Member	GO Biological Processes	GO:0150063	visual system development	-7.32589	-4.34093	18/368	182,357,652,1282,1969,2303,2321,4041,4915,5158,6664,6722,7020,7482,9355,10586,27077,388585	JAG1,SHROOM2,BMP4,COL4A1,EPHA2,FOXC2,FLT1,LRP5,NTRK2,PDE6B,SOX11,SRF,TFAP2A,WNT2B,LHX2,MAB21L2,B9D1,HES5
2_Member	GO Biological Processes	GO:0048880	sensory system development	-7.22005	-4.28834	18/374	182,357,652,1282,1969,2303,2321,4041,4915,5158,6664,6722,7020,7482,9355,10586,27077,388585	JAG1,SHROOM2,BMP4,COL4A1,EPHA2,FOXC2,FLT1,LRP5,NTRK2,PDE6B,SOX11,SRF,TFAP2A,WNT2B,LHX2,MAB21L2,B9D1,HES5
2_Member	GO Biological Processes	GO:0048568	embryonic organ development	-6.7625	-3.89293	19/446	652,1749,1969,2303,2304,2535,2637,3976,5154,6608,6664,6722,7004,7005,7020,8463,9394,54345,60529	BMP4,DLX5,EPHA2,FOXC2,FOXE1,FZD2,GBX2,LIF,PDGFA,SMO,SOX11,SRF,TEAD4,TEAD3,TFAP2A,TEAD2,HS6ST1,SOX18,ALX4
2_Member	GO Biological Processes	GO:0043009	chordate embryonic development	-6.26713	-3.47675	22/629	652,1969,2303,2535,2637,3976,5423,6598,6608,6664,6722,7004,7020,8463,8543,9355,9394,27077,54345,60529,64359,388585	BMP4,EPHA2,FOXC2,FZD2,GBX2,LIF,POLB,SMARCB1,SMO,SOX11,SRF,TEAD4,TFAP2A,TEAD2,LMO4,LHX2,HS6ST1,B9D1,SOX18,ALX4,NXN,HES5
2_Member	GO Biological Processes	GO:0009792	embryo development ending in birth or egg hatching	-6.0307	-3.28608	22/650	652,1969,2303,2535,2637,3976,5423,6598,6608,6664,6722,7004,7020,8463,8543,9355,9394,27077,54345,60529,64359,388585	BMP4,EPHA2,FOXC2,FZD2,GBX2,LIF,POLB,SMARCB1,SMO,SOX11,SRF,TEAD4,TFAP2A,TEAD2,LMO4,LHX2,HS6ST1,B9D1,SOX18,ALX4,NXN,HES5
2_Member	GO Biological Processes	GO:0048562	embryonic organ morphogenesis	-5.72355	-3.07924	14/292	652,1749,1969,2303,2304,2535,2637,6608,6664,6722,7020,8463,54345,60529	BMP4,DLX5,EPHA2,FOXC2,FOXE1,FZD2,GBX2,SMO,SOX11,SRF,TFAP2A,TEAD2,SOX18,ALX4
2_Member	GO Biological Processes	GO:0048593	camera-type eye morphogenesis	-5.36098	-2.80965	9/122	182,357,652,1969,4041,4915,6664,7020,7482	JAG1,SHROOM2,BMP4,EPHA2,LRP5,NTRK2,SOX11,TFAP2A,WNT2B
2_Member	GO Biological Processes	GO:0090596	sensory organ morphogenesis	-4.80607	-2.39388	12/261	182,357,652,1749,1969,2535,2637,4041,4915,6664,7020,7482	JAG1,SHROOM2,BMP4,DLX5,EPHA2,FZD2,GBX2,LRP5,NTRK2,SOX11,TFAP2A,WNT2B
2_Member	GO Biological Processes	GO:0048592	eye morphogenesis	-4.63522	-2.25701	9/150	182,357,652,1969,4041,4915,6664,7020,7482	JAG1,SHROOM2,BMP4,EPHA2,LRP5,NTRK2,SOX11,TFAP2A,WNT2B
2_Member	GO Biological Processes	GO:0060041	retina development in camera-type eye	-2.45437	-0.7609	6/144	1282,4041,4915,5158,7020,9355	COL4A1,LRP5,NTRK2,PDE6B,TFAP2A,LHX2
3_Summary	GO Biological Processes	GO:0061061	muscle structure development	-10.5444	-6.74905	25/480	87,182,274,467,652,1134,1465,2303,2535,3021,3679,3756,3976,4629,6608,6664,6722,6876,7004,7134,11155,55553,60529,150094,170689	ACTN1,JAG1,BIN1,ATF3,BMP4,CHRNA1,CSRP1,FOXC2,FZD2,H3-3B,ITGA7,KCNH1,LIF,MYH11,SMO,SOX11,SRF,TAGLN,TEAD4,TNNC1,LDB3,SOX6,ALX4,SIK1,ADAMTS15
3_Member	GO Biological Processes	GO:0061061	muscle structure development	-10.5444	-6.74905	25/480	87,182,274,467,652,1134,1465,2303,2535,3021,3679,3756,3976,4629,6608,6664,6722,6876,7004,7134,11155,55553,60529,150094,170689	ACTN1,JAG1,BIN1,ATF3,BMP4,CHRNA1,CSRP1,FOXC2,FZD2,H3-3B,ITGA7,KCNH1,LIF,MYH11,SMO,SOX11,SRF,TAGLN,TEAD4,TNNC1,LDB3,SOX6,ALX4,SIK1,ADAMTS15
3_Member	GO Biological Processes	GO:0007517	muscle organ development	-5.12207	-2.60146	13/285	467,1134,2303,2535,3679,3976,6608,6664,6876,7004,7134,55553,60529	ATF3,CHRNA1,FOXC2,FZD2,ITGA7,LIF,SMO,SOX11,TAGLN,TEAD4,TNNC1,SOX6,ALX4
3_Member	GO Biological Processes	GO:0007519	skeletal muscle tissue development	-2.12311	-0.523055	5/120	467,1134,3679,6608,6664	ATF3,CHRNA1,ITGA7,SMO,SOX11
4_Summary	GO Biological Processes	GO:0032989	cellular component morphogenesis	-10.3617	-6.71401	27/573	1465,1501,1630,1749,1907,1947,1952,1969,2044,2637,3691,3897,4192,4629,4744,4747,4803,6608,6722,9355,9369,11155,23769,56956,84446,114798,203447,11020,80303,388585,87,59277,652,1880,2321,5154,5328,27237,30817,286,388,1282,1284,1741,6328,6331,7225,57211	CSRP1,CTNND2,DCC,DLX5,EDN2,EFNB1,CELSR2,EPHA2,EPHA5,GBX2,ITGB4,L1CAM,MDK,MYH11,NEFH,NEFL,NGF,SMO,SRF,LHX2,NRXN3,LDB3,FLRT1,LHX9,BRSK1,SLITRK1,NRK,IFT27,EFHD1,HES5,ACTN1,NTN4,BMP4,GPR183,FLT1,PDGFA,PLAU,ARHGEF16,ADGRE2,ANK1,RHOB,COL4A1,COL4A2,DLG3,SCN3A,SCN5A,TRPC6,ADGRG6
4_Member	GO Biological Processes	GO:0032989	cellular component morphogenesis	-10.3617	-6.71401	27/573	1465,1501,1630,1749,1907,1947,1952,1969,2044,2637,3691,3897,4192,4629,4744,4747,4803,6608,6722,9355,9369,11155,23769,56956,84446,114798,203447	CSRP1,CTNND2,DCC,DLX5,EDN2,EFNB1,CELSR2,EPHA2,EPHA5,GBX2,ITGB4,L1CAM,MDK,MYH11,NEFH,NEFL,NGF,SMO,SRF,LHX2,NRXN3,LDB3,FLRT1,LHX9,BRSK1,SLITRK1,NRK
4_Member	GO Biological Processes	GO:0048858	cell projection morphogenesis	-8.60056	-5.25388	22/463	1501,1630,1749,1907,1947,1952,1969,2044,2637,3897,4192,4744,4747,4803,6608,9355,9369,23769,56956,84446,114798,203447	CTNND2,DCC,DLX5,EDN2,EFNB1,CELSR2,EPHA2,EPHA5,GBX2,L1CAM,MDK,NEFH,NEFL,NGF,SMO,LHX2,NRXN3,FLRT1,LHX9,BRSK1,SLITRK1,NRK
4_Member	GO Biological Processes	GO:0032990	cell part morphogenesis	-8.2822	-5.01469	22/482	1501,1630,1749,1907,1947,1952,1969,2044,2637,3897,4192,4744,4747,4803,6608,9355,9369,23769,56956,84446,114798,203447	CTNND2,DCC,DLX5,EDN2,EFNB1,CELSR2,EPHA2,EPHA5,GBX2,L1CAM,MDK,NEFH,NEFL,NGF,SMO,LHX2,NRXN3,FLRT1,LHX9,BRSK1,SLITRK1,NRK
4_Member	GO Biological Processes	GO:0048812	neuron projection morphogenesis	-8.01373	-4.8316	21/455	1501,1630,1749,1907,1947,1952,1969,2044,2637,3897,4744,4747,4803,6608,9355,9369,23769,56956,84446,114798,203447	CTNND2,DCC,DLX5,EDN2,EFNB1,CELSR2,EPHA2,EPHA5,GBX2,L1CAM,NEFH,NEFL,NGF,SMO,LHX2,NRXN3,FLRT1,LHX9,BRSK1,SLITRK1,NRK
4_Member	GO Biological Processes	GO:0031175	neuron projection development	-7.99216	-4.8316	25/639	1501,1630,1749,1907,1947,1952,1969,2044,2637,3897,4744,4747,4803,6608,6722,9355,9369,11020,23769,56956,80303,84446,114798,203447,388585	CTNND2,DCC,DLX5,EDN2,EFNB1,CELSR2,EPHA2,EPHA5,GBX2,L1CAM,NEFH,NEFL,NGF,SMO,SRF,LHX2,NRXN3,IFT27,FLRT1,LHX9,EFHD1,BRSK1,SLITRK1,NRK,HES5
4_Member	GO Biological Processes	GO:0120039	plasma membrane bounded cell projection morphogenesis	-7.94783	-4.8316	21/459	1501,1630,1749,1907,1947,1952,1969,2044,2637,3897,4744,4747,4803,6608,9355,9369,23769,56956,84446,114798,203447	CTNND2,DCC,DLX5,EDN2,EFNB1,CELSR2,EPHA2,EPHA5,GBX2,L1CAM,NEFH,NEFL,NGF,SMO,LHX2,NRXN3,FLRT1,LHX9,BRSK1,SLITRK1,NRK
4_Member	GO Biological Processes	GO:0000902	cell morphogenesis	-7.55229	-4.52782	25/673	87,1501,1630,1749,1907,1947,1952,1969,2044,2637,3897,4192,4744,4747,4803,6608,6722,9355,9369,23769,56956,59277,84446,114798,203447	ACTN1,CTNND2,DCC,DLX5,EDN2,EFNB1,CELSR2,EPHA2,EPHA5,GBX2,L1CAM,MDK,NEFH,NEFL,NGF,SMO,SRF,LHX2,NRXN3,FLRT1,LHX9,NTN4,BRSK1,SLITRK1,NRK
4_Member	GO Biological Processes	GO:0006935	chemotaxis	-6.56914	-3.72761	20/506	652,1630,1749,1880,1907,1947,1969,2044,2321,2637,3897,4192,5154,5328,6608,9355,9369,27237,30817,56956	BMP4,DCC,DLX5,GPR183,EDN2,EFNB1,EPHA2,EPHA5,FLT1,GBX2,L1CAM,MDK,PDGFA,PLAU,SMO,LHX2,NRXN3,ARHGEF16,ADGRE2,LHX9
4_Member	GO Biological Processes	GO:0042330	taxis	-6.51517	-3.69996	20/510	652,1630,1749,1880,1907,1947,1969,2044,2321,2637,3897,4192,5154,5328,6608,9355,9369,27237,30817,56956	BMP4,DCC,DLX5,GPR183,EDN2,EFNB1,EPHA2,EPHA5,FLT1,GBX2,L1CAM,MDK,PDGFA,PLAU,SMO,LHX2,NRXN3,ARHGEF16,ADGRE2,LHX9
4_Member	GO Biological Processes	GO:0000904	cell morphogenesis involved in differentiation	-6.35655	-3.55393	20/522	87,1501,1630,1749,1907,1947,1952,1969,2044,2637,3897,4744,6608,6722,9355,9369,56956,59277,84446,114798	ACTN1,CTNND2,DCC,DLX5,EDN2,EFNB1,CELSR2,EPHA2,EPHA5,GBX2,L1CAM,NEFH,SMO,SRF,LHX2,NRXN3,LHX9,NTN4,BRSK1,SLITRK1
4_Member	GO Biological Processes	GO:0048667	cell morphogenesis involved in neuron differentiation	-5.9346	-3.23136	17/411	1501,1630,1749,1907,1947,1952,1969,2044,2637,3897,4744,6608,9355,9369,56956,84446,114798	CTNND2,DCC,DLX5,EDN2,EFNB1,CELSR2,EPHA2,EPHA5,GBX2,L1CAM,NEFH,SMO,LHX2,NRXN3,LHX9,BRSK1,SLITRK1
4_Member	GO Biological Processes	GO:0061564	axon development	-5.71835	-3.07924	16/380	1630,1749,1907,1947,1969,2044,2637,3897,4744,4747,6608,9355,9369,56956,84446,114798	DCC,DLX5,EDN2,EFNB1,EPHA2,EPHA5,GBX2,L1CAM,NEFH,NEFL,SMO,LHX2,NRXN3,LHX9,BRSK1,SLITRK1
4_Member	GO Biological Processes	GO:0007409	axonogenesis	-5.6123	-2.99801	15/342	1630,1749,1907,1947,1969,2044,2637,3897,4744,6608,9355,9369,56956,84446,114798	DCC,DLX5,EDN2,EFNB1,EPHA2,EPHA5,GBX2,L1CAM,NEFH,SMO,LHX2,NRXN3,LHX9,BRSK1,SLITRK1
4_Member	GO Biological Processes	GO:0007411	axon guidance	-4.66207	-2.27443	11/227	1630,1749,1947,1969,2044,2637,3897,6608,9355,9369,56956	DCC,DLX5,EFNB1,EPHA2,EPHA5,GBX2,L1CAM,SMO,LHX2,NRXN3,LHX9
4_Member	GO Biological Processes	GO:0097485	neuron projection guidance	-4.64445	-2.26155	11/228	1630,1749,1947,1969,2044,2637,3897,6608,9355,9369,56956	DCC,DLX5,EFNB1,EPHA2,EPHA5,GBX2,L1CAM,SMO,LHX2,NRXN3,LHX9
4_Member	Reactome Gene Sets	R-HSA-9675108	Nervous system development	-4.56375	-2.19479	18/577	286,388,1282,1284,1630,1741,1947,1969,2044,3897,4629,6328,6331,7225,9355,56956,57211,59277	ANK1,RHOB,COL4A1,COL4A2,DCC,DLG3,EFNB1,EPHA2,EPHA5,L1CAM,MYH11,SCN3A,SCN5A,TRPC6,LHX2,LHX9,ADGRG6,NTN4
4_Member	Reactome Gene Sets	R-HSA-422475	Axon guidance	-4.27227	-2.00837	17/552	286,388,1282,1284,1630,1741,1947,1969,2044,3897,4629,6328,6331,7225,9355,56956,59277	ANK1,RHOB,COL4A1,COL4A2,DCC,DLG3,EFNB1,EPHA2,EPHA5,L1CAM,MYH11,SCN3A,SCN5A,TRPC6,LHX2,LHX9,NTN4
4_Member	KEGG Pathway	hsa04360	Axon guidance	-3.2576	-1.30361	8/182	1630,1947,1969,2044,3897,6608,7225,59277	DCC,EFNB1,EPHA2,EPHA5,L1CAM,SMO,TRPC6,NTN4
5_Summary	GO Biological Processes	GO:0043588	skin development	-7.7005	-4.65484	15/235	182,1001,1969,2304,2355,3691,3728,3872,5154,6608,6722,9076,9355,54345,60529,4488,652,1282,1749,2303,2535,6664,6876,23616,27077	JAG1,CDH3,EPHA2,FOXE1,FOSL2,ITGB4,JUP,KRT17,PDGFA,SMO,SRF,CLDN1,LHX2,SOX18,ALX4,MSX2,BMP4,COL4A1,DLX5,FOXC2,FZD2,SOX11,TAGLN,SH3BP1,B9D1
5_Member	GO Biological Processes	GO:0043588	skin development	-7.7005	-4.65484	15/235	182,1001,1969,2304,2355,3691,3728,3872,5154,6608,6722,9076,9355,54345,60529	JAG1,CDH3,EPHA2,FOXE1,FOSL2,ITGB4,JUP,KRT17,PDGFA,SMO,SRF,CLDN1,LHX2,SOX18,ALX4
5_Member	GO Biological Processes	GO:0022404	molting cycle process	-5.86017	-3.17624	8/79	1001,2304,3872,5154,6608,9355,54345,60529	CDH3,FOXE1,KRT17,PDGFA,SMO,LHX2,SOX18,ALX4
5_Member	GO Biological Processes	GO:0022405	hair cycle process	-5.86017	-3.17624	8/79	1001,2304,3872,5154,6608,9355,54345,60529	CDH3,FOXE1,KRT17,PDGFA,SMO,LHX2,SOX18,ALX4
5_Member	GO Biological Processes	GO:0042303	molting cycle	-5.357	-2.80965	8/92	1001,2304,3872,5154,6608,9355,54345,60529	CDH3,FOXE1,KRT17,PDGFA,SMO,LHX2,SOX18,ALX4
5_Member	GO Biological Processes	GO:0042633	hair cycle	-5.357	-2.80965	8/92	1001,2304,3872,5154,6608,9355,54345,60529	CDH3,FOXE1,KRT17,PDGFA,SMO,LHX2,SOX18,ALX4
5_Member	GO Biological Processes	GO:0001942	hair follicle development	-4.95822	-2.4866	7/75	2304,3872,5154,6608,9355,54345,60529	FOXE1,KRT17,PDGFA,SMO,LHX2,SOX18,ALX4
5_Member	GO Biological Processes	GO:0098773	skin epidermis development	-4.80867	-2.39388	7/79	2304,3872,5154,6608,9355,54345,60529	FOXE1,KRT17,PDGFA,SMO,LHX2,SOX18,ALX4
5_Member	GO Biological Processes	GO:0051797	regulation of hair follicle development	-4.45559	-2.13327	4/19	1001,3872,4488,6608	CDH3,KRT17,MSX2,SMO
5_Member	GO Biological Processes	GO:0030855	epithelial cell differentiation	-4.30135	-2.01537	17/549	182,652,1001,1282,1749,1969,2303,2355,2535,3872,6608,6664,6876,9076,23616,27077,54345	JAG1,BMP4,CDH3,COL4A1,DLX5,EPHA2,FOXC2,FOSL2,FZD2,KRT17,SMO,SOX11,TAGLN,CLDN1,SH3BP1,B9D1,SOX18
5_Member	GO Biological Processes	GO:0008544	epidermis development	-3.84325	-1.70618	11/280	182,1001,1969,2304,2355,3872,5154,6608,9355,54345,60529	JAG1,CDH3,EPHA2,FOXE1,FOSL2,KRT17,PDGFA,SMO,LHX2,SOX18,ALX4
5_Member	GO Biological Processes	GO:0042634	regulation of hair cycle	-3.76385	-1.64761	4/28	1001,3872,4488,6608	CDH3,KRT17,MSX2,SMO
5_Member	GO Biological Processes	GO:0031069	hair follicle morphogenesis	-2.471	-0.773402	3/30	2304,3872,6608	FOXE1,KRT17,SMO
5_Member	GO Biological Processes	GO:0048730	epidermis morphogenesis	-2.31543	-0.66086	3/34	2304,3872,6608	FOXE1,KRT17,SMO
5_Member	GO Biological Processes	GO:0030216	keratinocyte differentiation	-2.31382	-0.66086	5/108	182,1001,1969,2355,3872	JAG1,CDH3,EPHA2,FOSL2,KRT17
6_Summary	WikiPathways	WP4541	Hippo-Merlin signaling dysregulation	-7.28028	-4.3138	11/123	1001,1969,2321,3679,3691,4915,5575,7004,7005,8463,94274,330,652,1741,2535,7159,7482,8994,83439,72,51421,182	CDH3,EPHA2,FLT1,ITGA7,ITGB4,NTRK2,PRKAR1B,TEAD4,TEAD3,TEAD2,PPP1R14A,BIRC3,BMP4,DLG3,FZD2,TP53BP2,WNT2B,LIMD1,TCF7L1,ACTG2,AMOTL2,JAG1
6_Member	WikiPathways	WP4541	Hippo-Merlin signaling dysregulation	-7.28028	-4.3138	11/123	1001,1969,2321,3679,3691,4915,5575,7004,7005,8463,94274	CDH3,EPHA2,FLT1,ITGA7,ITGB4,NTRK2,PRKAR1B,TEAD4,TEAD3,TEAD2,PPP1R14A
6_Member	KEGG Pathway	hsa04390	Hippo signaling pathway	-6.20173	-3.42324	11/157	330,652,1741,2535,7004,7005,7159,7482,8463,8994,83439	BIRC3,BMP4,DLG3,FZD2,TEAD4,TEAD3,TP53BP2,WNT2B,TEAD2,LIMD1,TCF7L1
6_Member	WikiPathways	WP4540	Hippo signaling regulation pathways	-6.12102	-3.3654	9/99	1001,1969,2321,4915,5575,7004,7005,8463,83439	CDH3,EPHA2,FLT1,NTRK2,PRKAR1B,TEAD4,TEAD3,TEAD2,TCF7L1
6_Member	WikiPathways	WP4534	Mechanoregulation and pathology of YAP/TAZ via Hippo and non-Hippo mechanisms	-5.0625	-2.55467	6/48	72,3691,7004,7005,8463,8994	ACTG2,ITGB4,TEAD4,TEAD3,TEAD2,LIMD1
6_Member	GO Biological Processes	GO:0035329	hippo signaling	-4.45559	-2.13327	4/19	7004,7005,8463,51421	TEAD4,TEAD3,TEAD2,AMOTL2
6_Member	Reactome Gene Sets	R-HSA-8951671	RUNX3 regulates YAP1-mediated transcription	-4.25998	-2.00585	3/8	7004,7005,8463	TEAD4,TEAD3,TEAD2
6_Member	KEGG Pathway	hsa04392	Hippo signaling pathway - multiple species	-3.70284	-1.60167	4/29	7004,7005,8463,8994	TEAD4,TEAD3,TEAD2,LIMD1
6_Member	Reactome Gene Sets	R-HSA-2032785	YAP1- and WWTR1 (TAZ)-stimulated gene expression	-3.37294	-1.38987	3/15	7004,7005,8463	TEAD4,TEAD3,TEAD2
6_Member	WikiPathways	WP4533	Transcription co-factors SKI and SKIL protein partners	-3.12901	-1.22007	3/18	7004,7005,8463	TEAD4,TEAD3,TEAD2
6_Member	WikiPathways	WP3967	miR-509-3p alteration of YAP1/ECM axis	-3.05762	-1.16272	3/19	7004,7005,8463	TEAD4,TEAD3,TEAD2
6_Member	WikiPathways	WP4537	Hippo-Yap signaling pathway	-2.80869	-1.00233	3/23	7004,7005,8463	TEAD4,TEAD3,TEAD2
6_Member	Reactome Gene Sets	R-HSA-8878159	Transcriptional regulation by RUNX3	-2.53242	-0.815145	5/96	182,7004,7005,8463,83439	JAG1,TEAD4,TEAD3,TEAD2,TCF7L1
6_Member	WikiPathways	WP4542	Overview of leukocyte-intrinsic Hippo pathway functions	-2.24516	-0.611124	3/36	7004,7005,8463	TEAD4,TEAD3,TEAD2
7_Summary	GO Biological Processes	GO:0007167	enzyme linked receptor protein signaling pathway	-7.22039	-4.28834	23/601	652,1282,1284,1749,1947,1969,2044,2065,2250,2303,2321,2591,3055,3976,4488,4803,4915,5154,5327,23294,23769,151742,401474,3728,4192,5774,6722,155066,9076,11173,55553	BMP4,COL4A1,COL4A2,DLX5,EFNB1,EPHA2,EPHA5,ERBB3,FGF5,FOXC2,FLT1,GALNT3,HCK,LIF,MSX2,NGF,NTRK2,PDGFA,PLAT,ANKS1A,FLRT1,PPM1L,SAMD12,JUP,MDK,PTPN3,SRF,ATP6V0E2,CLDN1,ADAMTS7,SOX6
7_Member	GO Biological Processes	GO:0007167	enzyme linked receptor protein signaling pathway	-7.22039	-4.28834	23/601	652,1282,1284,1749,1947,1969,2044,2065,2250,2303,2321,2591,3055,3976,4488,4803,4915,5154,5327,23294,23769,151742,401474	BMP4,COL4A1,COL4A2,DLX5,EFNB1,EPHA2,EPHA5,ERBB3,FGF5,FOXC2,FLT1,GALNT3,HCK,LIF,MSX2,NGF,NTRK2,PDGFA,PLAT,ANKS1A,FLRT1,PPM1L,SAMD12
7_Member	GO Biological Processes	GO:0007169	transmembrane receptor protein tyrosine kinase signaling pathway	-6.73705	-3.88172	18/403	1282,1284,1947,1969,2044,2065,2250,2303,2321,2591,3055,4803,4915,5154,5327,23294,23769,401474	COL4A1,COL4A2,EFNB1,EPHA2,EPHA5,ERBB3,FGF5,FOXC2,FLT1,GALNT3,HCK,NGF,NTRK2,PDGFA,PLAT,ANKS1A,FLRT1,SAMD12
7_Member	Reactome Gene Sets	R-HSA-9006934	Signaling by Receptor Tyrosine Kinases	-4.03942	-1.84246	16/521	1282,1284,2065,2250,2321,2591,3728,4192,4803,4915,5154,5327,5774,6722,23769,155066	COL4A1,COL4A2,ERBB3,FGF5,FLT1,GALNT3,JUP,MDK,NGF,NTRK2,PDGFA,PLAT,PTPN3,SRF,FLRT1,ATP6V0E2
7_Member	GO Biological Processes	GO:0070848	response to growth factor	-3.77794	-1.65656	15/493	652,1284,1749,1969,2250,2321,2591,4488,4803,4915,5154,9076,11173,23769,55553	BMP4,COL4A2,DLX5,EPHA2,FGF5,FLT1,GALNT3,MSX2,NGF,NTRK2,PDGFA,CLDN1,ADAMTS7,FLRT1,SOX6
7_Member	GO Biological Processes	GO:0071363	cellular response to growth factor stimulus	-3.52625	-1.48982	14/464	652,1284,1749,2250,2321,2591,4488,4803,4915,5154,9076,11173,23769,55553	BMP4,COL4A2,DLX5,FGF5,FLT1,GALNT3,MSX2,NGF,NTRK2,PDGFA,CLDN1,ADAMTS7,FLRT1,SOX6
8_Summary	WikiPathways	WP2064	Neural crest differentiation	-7.04997	-4.13465	10/102	388,652,1749,2637,4488,4791,7020,9355,83439,388585,1501,1952,3728,54898	RHOB,BMP4,DLX5,GBX2,MSX2,NFKB2,TFAP2A,LHX2,TCF7L1,HES5,CTNND2,CELSR2,JUP,ELOVL2
8_Member	WikiPathways	WP2064	Neural crest differentiation	-7.04997	-4.13465	10/102	388,652,1749,2637,4488,4791,7020,9355,83439,388585	RHOB,BMP4,DLX5,GBX2,MSX2,NFKB2,TFAP2A,LHX2,TCF7L1,HES5
8_Member	WikiPathways	WP2858	Ectoderm differentiation	-3.17074	-1.23903	7/144	652,1501,1952,3728,7020,54898,83439	BMP4,CTNND2,CELSR2,JUP,TFAP2A,ELOVL2,TCF7L1
9_Summary	KEGG Pathway	hsa05200	Pathways in cancer	-6.8744	-3.97487	21/531	112,182,330,652,1282,1284,1630,2250,2535,3728,4041,4791,5154,6513,6608,7482,9618,10125,10235,83439,388585,5287,1741,3679,3691,9636,57801,155066,2303,9076,467,5328,7020,1001,1134,1501,1952,51421,64359,3976	ADCY6,JAG1,BIRC3,BMP4,COL4A1,COL4A2,DCC,FGF5,FZD2,JUP,LRP5,NFKB2,PDGFA,SLC2A1,SMO,WNT2B,TRAF4,RASGRP1,RASGRP2,TCF7L1,HES5,PIK3C2B,DLG3,ITGA7,ITGB4,ISG15,HES4,ATP6V0E2,FOXC2,CLDN1,ATF3,PLAU,TFAP2A,CDH3,CHRNA1,CTNND2,CELSR2,AMOTL2,NXN,LIF
9_Member	KEGG Pathway	hsa05200	Pathways in cancer	-6.8744	-3.97487	21/531	112,182,330,652,1282,1284,1630,2250,2535,3728,4041,4791,5154,6513,6608,7482,9618,10125,10235,83439,388585	ADCY6,JAG1,BIRC3,BMP4,COL4A1,COL4A2,DCC,FGF5,FZD2,JUP,LRP5,NFKB2,PDGFA,SLC2A1,SMO,WNT2B,TRAF4,RASGRP1,RASGRP2,TCF7L1,HES5
9_Member	WikiPathways	WP4787	Osteoblast differentiation and related diseases	-4.50727	-2.16058	8/120	182,652,2250,2535,4041,5287,6608,7482	JAG1,BMP4,FGF5,FZD2,LRP5,PIK3C2B,SMO,WNT2B
9_Member	KEGG Pathway	hsa05165	Human papillomavirus infection	-4.43916	-2.1234	13/331	182,1282,1284,1741,2535,3679,3691,7482,9636,57801,83439,155066,388585	JAG1,COL4A1,COL4A2,DLG3,FZD2,ITGA7,ITGB4,WNT2B,ISG15,HES4,TCF7L1,ATP6V0E2,HES5
9_Member	WikiPathways	WP4239	Epithelial to mesenchymal transition in colorectal cancer	-4.30996	-2.02018	9/165	182,1282,1284,2303,2535,3728,4041,7482,9076	JAG1,COL4A1,COL4A2,FOXC2,FZD2,JUP,LRP5,WNT2B,CLDN1
9_Member	WikiPathways	WP4258	lncRNA in canonical Wnt signaling and colorectal cancer	-4.03686	-1.84246	7/104	467,2535,4041,5328,7020,7482,83439	ATF3,FZD2,LRP5,PLAU,TFAP2A,WNT2B,TCF7L1
9_Member	GO Biological Processes	GO:1905114	cell surface receptor signaling pathway involved in cell-cell signaling	-3.96422	-1.80313	12/319	652,1001,1134,1501,1952,2535,4041,6608,7482,51421,64359,83439	BMP4,CDH3,CHRNA1,CTNND2,CELSR2,FZD2,LRP5,SMO,WNT2B,AMOTL2,NXN,TCF7L1
9_Member	KEGG Pathway	hsa05224	Breast cancer	-3.88459	-1.74028	8/147	182,2250,2535,4041,4791,7482,83439,388585	JAG1,FGF5,FZD2,LRP5,NFKB2,WNT2B,TCF7L1,HES5
9_Member	WikiPathways	WP3931	Embryonic stem cell pluripotency pathways	-3.67152	-1.58011	7/119	652,2250,2535,3976,4041,5154,7482	BMP4,FGF5,FZD2,LIF,LRP5,PDGFA,WNT2B
9_Member	WikiPathways	WP4262	Breast cancer pathway	-2.95064	-1.08826	7/157	2250,2535,4041,4791,7482,83439,388585	FGF5,FZD2,LRP5,NFKB2,WNT2B,TCF7L1,HES5
9_Member	GO Biological Processes	GO:0016055	Wnt signaling pathway	-2.91511	-1.07086	9/255	1001,1501,1952,2535,4041,7482,51421,64359,83439	CDH3,CTNND2,CELSR2,FZD2,LRP5,WNT2B,AMOTL2,NXN,TCF7L1
9_Member	GO Biological Processes	GO:0198738	cell-cell signaling by wnt	-2.91511	-1.07086	9/255	1001,1501,1952,2535,4041,7482,51421,64359,83439	CDH3,CTNND2,CELSR2,FZD2,LRP5,WNT2B,AMOTL2,NXN,TCF7L1
9_Member	GO Biological Processes	GO:0060070	canonical Wnt signaling pathway	-2.83314	-1.0102	5/82	1001,2535,4041,7482,83439	CDH3,FZD2,LRP5,WNT2B,TCF7L1
9_Member	WikiPathways	WP4336	ncRNAs involved in Wnt signaling in hepatocellular carcinoma	-2.63346	-0.882268	5/91	2535,4041,5328,7482,83439	FZD2,LRP5,PLAU,WNT2B,TCF7L1
9_Member	KEGG Pathway	hsa05226	Gastric cancer	-2.38193	-0.711021	6/149	2250,2535,3728,4041,7482,83439	FGF5,FZD2,JUP,LRP5,WNT2B,TCF7L1
9_Member	WikiPathways	WP399	Wnt signaling pathway and pluripotency	-2.33088	-0.669938	5/107	2535,4041,5328,7482,83439	FZD2,LRP5,PLAU,WNT2B,TCF7L1
9_Member	WikiPathways	WP710	DNA damage response (only ATM dependent)	-2.19957	-0.580425	5/115	4791,5287,5328,7482,83439	NFKB2,PIK3C2B,PLAU,WNT2B,TCF7L1
9_Member	WikiPathways	WP428	Wnt signaling	-2.15321	-0.544509	5/118	2535,4041,5328,7482,83439	FZD2,LRP5,PLAU,WNT2B,TCF7L1
9_Member	WikiPathways	WP4150	Wnt signaling in kidney disease	-2.1476	-0.542854	3/39	2535,4041,7482	FZD2,LRP5,WNT2B
10_Summary	GO Biological Processes	GO:0003205	cardiac chamber development	-6.83242	-3.94813	12/167	182,652,2303,2535,4488,6331,6608,6664,6722,7134,8543,57211,467,1134,1465,3679,4629,150094,72,1947,2065,2637,4017,8463,1969,3055,3691,9355,3976,54345,1952,4041,57801,60529,388585,11155,7482,1282,57471,11020,1284,7004,7005,55553,388,9076,7020,51301,2355	JAG1,BMP4,FOXC2,FZD2,MSX2,SCN5A,SMO,SOX11,SRF,TNNC1,LMO4,ADGRG6,ATF3,CHRNA1,CSRP1,ITGA7,MYH11,SIK1,ACTG2,EFNB1,ERBB3,GBX2,LOXL2,TEAD2,EPHA2,HCK,ITGB4,LHX2,LIF,SOX18,CELSR2,LRP5,HES4,ALX4,HES5,LDB3,WNT2B,COL4A1,ERMN,IFT27,COL4A2,TEAD4,TEAD3,SOX6,RHOB,CLDN1,TFAP2A,GCNT4,FOSL2
10_Member	GO Biological Processes	GO:0003205	cardiac chamber development	-6.83242	-3.94813	12/167	182,652,2303,2535,4488,6331,6608,6664,6722,7134,8543,57211	JAG1,BMP4,FOXC2,FZD2,MSX2,SCN5A,SMO,SOX11,SRF,TNNC1,LMO4,ADGRG6
10_Member	GO Biological Processes	GO:0003206	cardiac chamber morphogenesis	-6.18607	-3.41916	10/126	182,652,2303,2535,4488,6608,6664,6722,7134,57211	JAG1,BMP4,FOXC2,FZD2,MSX2,SMO,SOX11,SRF,TNNC1,ADGRG6
10_Member	GO Biological Processes	GO:0060537	muscle tissue development	-5.48709	-2.90384	14/306	467,652,1134,1465,2303,3679,4488,4629,6331,6608,6664,6722,7134,150094	ATF3,BMP4,CHRNA1,CSRP1,FOXC2,ITGA7,MSX2,MYH11,SCN5A,SMO,SOX11,SRF,TNNC1,SIK1
10_Member	GO Biological Processes	GO:0060485	mesenchyme development	-5.36008	-2.80965	12/230	72,182,652,1947,2065,2303,2637,4017,4488,6608,6664,8463	ACTG2,JAG1,BMP4,EFNB1,ERBB3,FOXC2,GBX2,LOXL2,MSX2,SMO,SOX11,TEAD2
10_Member	GO Biological Processes	GO:0007498	mesoderm development	-5.3318	-2.79129	9/123	652,1969,2303,3055,3691,6608,6722,8463,9355	BMP4,EPHA2,FOXC2,HCK,ITGB4,SMO,SRF,TEAD2,LHX2
10_Member	GO Biological Processes	GO:0048863	stem cell differentiation	-5.14988	-2.61611	10/164	182,1947,2303,2637,3976,4488,6608,6664,6722,54345	JAG1,EFNB1,FOXC2,GBX2,LIF,MSX2,SMO,SOX11,SRF,SOX18
10_Member	GO Biological Processes	GO:0014706	striated muscle tissue development	-5.08951	-2.57534	13/287	467,652,1134,2303,3679,4488,4629,6331,6608,6664,6722,7134,150094	ATF3,BMP4,CHRNA1,FOXC2,ITGA7,MSX2,MYH11,SCN5A,SMO,SOX11,SRF,TNNC1,SIK1
10_Member	GO Biological Processes	GO:0003007	heart morphogenesis	-4.99281	-2.49739	12/250	182,652,2303,2535,4488,6608,6664,6722,7134,8463,54345,57211	JAG1,BMP4,FOXC2,FZD2,MSX2,SMO,SOX11,SRF,TNNC1,TEAD2,SOX18,ADGRG6
10_Member	GO Biological Processes	GO:0009952	anterior/posterior pattern specification	-4.97714	-2.49418	11/210	652,1952,2303,2637,4041,4488,6608,6722,57801,60529,388585	BMP4,CELSR2,FOXC2,GBX2,LRP5,MSX2,SMO,SRF,HES4,ALX4,HES5
10_Member	GO Biological Processes	GO:0007507	heart development	-4.92316	-2.45729	18/542	182,652,2065,2303,2535,4488,4629,6331,6608,6664,6722,7134,8463,8543,11155,54345,57211,150094	JAG1,BMP4,ERBB3,FOXC2,FZD2,MSX2,MYH11,SCN5A,SMO,SOX11,SRF,TNNC1,TEAD2,LMO4,LDB3,SOX18,ADGRG6,SIK1
10_Member	GO Biological Processes	GO:0003002	regionalization	-4.4257	-2.11644	13/332	652,1952,2303,2637,4041,4488,6608,6722,7482,9355,57801,60529,388585	BMP4,CELSR2,FOXC2,GBX2,LRP5,MSX2,SMO,SRF,WNT2B,LHX2,HES4,ALX4,HES5
10_Member	GO Biological Processes	GO:0003231	cardiac ventricle development	-4.35536	-2.054	8/126	182,652,2303,2535,6331,6664,7134,8543	JAG1,BMP4,FOXC2,FZD2,SCN5A,SOX11,TNNC1,LMO4
10_Member	GO Biological Processes	GO:0007389	pattern specification process	-4.29021	-2.0087	15/443	652,1947,1952,2303,2637,4041,4488,6608,6722,7482,9355,54345,57801,60529,388585	BMP4,EFNB1,CELSR2,FOXC2,GBX2,LRP5,MSX2,SMO,SRF,WNT2B,LHX2,SOX18,HES4,ALX4,HES5
10_Member	GO Biological Processes	GO:0048762	mesenchymal cell differentiation	-4.2492	-1.99942	9/168	182,652,1947,2303,2637,4017,4488,6608,6664	JAG1,BMP4,EFNB1,FOXC2,GBX2,LOXL2,MSX2,SMO,SOX11
10_Member	GO Biological Processes	GO:0001763	morphogenesis of a branching structure	-4.18974	-1.9592	9/171	652,1282,1969,2303,2637,4041,4488,6722,57471	BMP4,COL4A1,EPHA2,FOXC2,GBX2,LRP5,MSX2,SRF,ERMN
10_Member	GO Biological Processes	GO:0048754	branching morphogenesis of an epithelial tube	-4.18862	-1.9592	8/133	652,1282,1969,2303,2637,4041,4488,6722	BMP4,COL4A1,EPHA2,FOXC2,GBX2,LRP5,MSX2,SRF
10_Member	WikiPathways	WP4830	GDNF/RET signaling axis	-4.11062	-1.89104	4/23	652,2303,6664,11020	BMP4,FOXC2,SOX11,IFT27
10_Member	GO Biological Processes	GO:0001704	formation of primary germ layer	-3.78693	-1.66297	7/114	652,1284,1969,2303,3679,3691,6722	BMP4,COL4A2,EPHA2,FOXC2,ITGA7,ITGB4,SRF
10_Member	GO Biological Processes	GO:0014032	neural crest cell development	-3.76113	-1.64744	6/81	182,1947,2303,2637,6608,6664	JAG1,EFNB1,FOXC2,GBX2,SMO,SOX11
10_Member	GO Biological Processes	GO:0045165	cell fate commitment	-3.69059	-1.59188	10/244	182,652,2303,6608,7004,7005,7482,54345,55553,388585	JAG1,BMP4,FOXC2,SMO,TEAD4,TEAD3,WNT2B,SOX18,SOX6,HES5
10_Member	GO Biological Processes	GO:0014031	mesenchymal cell development	-3.61842	-1.54125	6/86	182,1947,2303,2637,6608,6664	JAG1,EFNB1,FOXC2,GBX2,SMO,SOX11
10_Member	GO Biological Processes	GO:0048864	stem cell development	-3.61842	-1.54125	6/86	182,1947,2303,2637,6608,6664	JAG1,EFNB1,FOXC2,GBX2,SMO,SOX11
10_Member	GO Biological Processes	GO:0007369	gastrulation	-3.61373	-1.53889	8/161	652,1284,1969,2303,3679,3691,4041,6722	BMP4,COL4A2,EPHA2,FOXC2,ITGA7,ITGB4,LRP5,SRF
10_Member	GO Biological Processes	GO:0061138	morphogenesis of a branching epithelium	-3.59549	-1.52899	8/162	652,1282,1969,2303,2637,4041,4488,6722	BMP4,COL4A1,EPHA2,FOXC2,GBX2,LRP5,MSX2,SRF
10_Member	GO Biological Processes	GO:0001569	branching involved in blood vessel morphogenesis	-3.58759	-1.52899	4/31	1282,2303,2637,6722	COL4A1,FOXC2,GBX2,SRF
10_Member	GO Biological Processes	GO:0003158	endothelium development	-3.48508	-1.47083	6/91	182,388,652,2303,9076,54345	JAG1,RHOB,BMP4,FOXC2,CLDN1,SOX18
10_Member	GO Biological Processes	GO:0014033	neural crest cell differentiation	-3.43412	-1.43379	6/93	182,1947,2303,2637,6608,6664	JAG1,EFNB1,FOXC2,GBX2,SMO,SOX11
10_Member	GO Biological Processes	GO:0048738	cardiac muscle tissue development	-3.40363	-1.41105	8/173	652,2303,4488,4629,6331,6722,7134,150094	BMP4,FOXC2,MSX2,MYH11,SCN5A,SRF,TNNC1,SIK1
10_Member	GO Biological Processes	GO:0035850	epithelial cell differentiation involved in kidney development	-3.33249	-1.35871	4/36	182,652,2303,6608	JAG1,BMP4,FOXC2,SMO
10_Member	GO Biological Processes	GO:0001707	mesoderm formation	-3.20129	-1.25894	5/68	652,1969,2303,3691,6722	BMP4,EPHA2,FOXC2,ITGB4,SRF
10_Member	GO Biological Processes	GO:0048332	mesoderm morphogenesis	-3.14356	-1.22012	5/70	652,1969,2303,3691,6722	BMP4,EPHA2,FOXC2,ITGB4,SRF
10_Member	GO Biological Processes	GO:0072001	renal system development	-3.02438	-1.13859	10/297	182,652,1282,2303,6608,6664,7020,11020,51301,388585	JAG1,BMP4,COL4A1,FOXC2,SMO,SOX11,TFAP2A,IFT27,GCNT4,HES5
10_Member	GO Biological Processes	GO:0002064	epithelial cell development	-2.97726	-1.1077	8/201	182,652,1969,2303,2355,6608,9076,54345	JAG1,BMP4,EPHA2,FOXC2,FOSL2,SMO,CLDN1,SOX18
10_Member	GO Biological Processes	GO:0061318	renal filtration cell differentiation	-2.92658	-1.07551	3/21	182,652,2303	JAG1,BMP4,FOXC2
10_Member	GO Biological Processes	GO:0072112	glomerular visceral epithelial cell differentiation	-2.92658	-1.07551	3/21	182,652,2303	JAG1,BMP4,FOXC2
10_Member	WikiPathways	WP1591	Heart development	-2.92431	-1.07551	4/46	652,2065,2303,6722	BMP4,ERBB3,FOXC2,SRF
10_Member	GO Biological Processes	GO:0061005	cell differentiation involved in kidney development	-2.88911	-1.04893	4/47	182,652,2303,6608	JAG1,BMP4,FOXC2,SMO
10_Member	GO Biological Processes	GO:0072311	glomerular epithelial cell differentiation	-2.86615	-1.03401	3/22	182,652,2303	JAG1,BMP4,FOXC2
10_Member	GO Biological Processes	GO:0072010	glomerular epithelium development	-2.70165	-0.925359	3/25	182,652,2303	JAG1,BMP4,FOXC2
10_Member	GO Biological Processes	GO:0048333	mesodermal cell differentiation	-2.65164	-0.891541	3/26	652,2303,3691	BMP4,FOXC2,ITGB4
10_Member	GO Biological Processes	GO:0001655	urogenital system development	-2.6476	-0.88863	10/334	182,652,1282,2303,6608,6664,7020,11020,51301,388585	JAG1,BMP4,COL4A1,FOXC2,SMO,SOX11,TFAP2A,IFT27,GCNT4,HES5
10_Member	GO Biological Processes	GO:0048704	embryonic skeletal system morphogenesis	-2.57206	-0.841327	5/94	652,2303,6664,7020,60529	BMP4,FOXC2,SOX11,TFAP2A,ALX4
10_Member	GO Biological Processes	GO:0001822	kidney development	-2.55658	-0.831069	9/288	182,652,2303,6608,6664,7020,11020,51301,388585	JAG1,BMP4,FOXC2,SMO,SOX11,TFAP2A,IFT27,GCNT4,HES5
10_Member	GO Biological Processes	GO:0072009	nephron epithelium development	-2.47478	-0.773402	5/99	182,652,2303,6608,388585	JAG1,BMP4,FOXC2,SMO,HES5
10_Member	GO Biological Processes	GO:0048844	artery morphogenesis	-2.27879	-0.636259	4/69	182,652,2303,6722	JAG1,BMP4,FOXC2,SRF
10_Member	GO Biological Processes	GO:0003208	cardiac ventricle morphogenesis	-2.21343	-0.590061	4/72	182,2303,6664,7134	JAG1,FOXC2,SOX11,TNNC1
10_Member	GO Biological Processes	GO:0048644	muscle organ morphogenesis	-2.05382	-0.47872	4/80	2303,2535,3976,7134	FOXC2,FZD2,LIF,TNNC1
10_Member	GO Biological Processes	GO:0048706	embryonic skeletal system development	-2.02251	-0.453972	5/127	652,2303,6664,7020,60529	BMP4,FOXC2,SOX11,TFAP2A,ALX4
10_Member	GO Biological Processes	GO:0072006	nephron development	-2.00871	-0.445924	5/128	182,652,2303,6608,388585	JAG1,BMP4,FOXC2,SMO,HES5
10_Member	GO Biological Processes	GO:0072073	kidney epithelium development	-2.00871	-0.445924	5/128	182,652,2303,6608,388585	JAG1,BMP4,FOXC2,SMO,HES5
11_Summary	GO Biological Processes	GO:1905330	regulation of morphogenesis of an epithelium	-6.52047	-3.69996	8/65	652,3976,4192,5154,6608,7482,59277,388591,4041,1952,2535,83439,388585,1001,1749,6331,6664,9076,9355,6722,2321,55679,1880,5423,27040,51301,80177,2637,27077,2303,2304,60529	BMP4,LIF,MDK,PDGFA,SMO,WNT2B,NTN4,RNF207,LRP5,CELSR2,FZD2,TCF7L1,HES5,CDH3,DLX5,SCN5A,SOX11,CLDN1,LHX2,SRF,FLT1,LIMS2,GPR183,POLB,LAT,GCNT4,MYCT1,GBX2,B9D1,FOXC2,FOXE1,ALX4
11_Member	GO Biological Processes	GO:1905330	regulation of morphogenesis of an epithelium	-6.52047	-3.69996	8/65	652,3976,4192,5154,6608,7482,59277,388591	BMP4,LIF,MDK,PDGFA,SMO,WNT2B,NTN4,RNF207
11_Member	GO Biological Processes	GO:0060688	regulation of morphogenesis of a branching structure	-4.90693	-2.44688	6/51	652,4192,5154,6608,7482,59277	BMP4,MDK,PDGFA,SMO,WNT2B,NTN4
11_Member	GO Biological Processes	GO:0060684	epithelial-mesenchymal cell signaling	-4.70061	-2.30331	3/6	652,5154,6608	BMP4,PDGFA,SMO
11_Member	GO Biological Processes	GO:1905332	positive regulation of morphogenesis of an epithelium	-4.52869	-2.17323	5/36	652,3976,4192,6608,7482	BMP4,LIF,MDK,SMO,WNT2B
11_Member	GO Biological Processes	GO:0010464	regulation of mesenchymal cell proliferation	-3.70284	-1.60167	4/29	652,4041,5154,6608	BMP4,LRP5,PDGFA,SMO
11_Member	GO Biological Processes	GO:2000027	regulation of animal organ morphogenesis	-3.51933	-1.48862	7/126	652,1952,2535,5154,6608,7482,59277	BMP4,CELSR2,FZD2,PDGFA,SMO,WNT2B,NTN4
11_Member	WikiPathways	WP2839	Hair follicle development: organogenesis - part 2 of 3	-3.48037	-1.46814	4/33	652,4041,5154,6608	BMP4,LRP5,PDGFA,SMO
11_Member	KEGG Pathway	hsa05217	Basal cell carcinoma	-3.35465	-1.37532	5/63	652,2535,6608,7482,83439	BMP4,FZD2,SMO,WNT2B,TCF7L1
11_Member	GO Biological Processes	GO:0072273	metanephric nephron morphogenesis	-2.92658	-1.07551	3/21	652,6608,388585	BMP4,SMO,HES5
11_Member	GO Biological Processes	GO:0090189	regulation of branching involved in ureteric bud morphogenesis	-2.92658	-1.07551	3/21	652,6608,7482	BMP4,SMO,WNT2B
11_Member	GO Biological Processes	GO:0050679	positive regulation of epithelial cell proliferation	-2.86919	-1.03439	8/209	652,1001,1749,4192,6331,6608,6664,9076	BMP4,CDH3,DLX5,MDK,SCN5A,SMO,SOX11,CLDN1
11_Member	GO Biological Processes	GO:0002053	positive regulation of mesenchymal cell proliferation	-2.80869	-1.00233	3/23	4041,5154,6608	LRP5,PDGFA,SMO
11_Member	GO Biological Processes	GO:0021871	forebrain regionalization	-2.80869	-1.00233	3/23	652,7482,9355	BMP4,WNT2B,LHX2
11_Member	GO Biological Processes	GO:0048745	smooth muscle tissue development	-2.75393	-0.968597	3/24	652,6608,6722	BMP4,SMO,SRF
11_Member	GO Biological Processes	GO:0050678	regulation of epithelial cell proliferation	-2.75366	-0.968597	11/379	652,1001,1749,2321,4192,6331,6608,6664,9076,55679,388585	BMP4,CDH3,DLX5,FLT1,MDK,SCN5A,SMO,SOX11,CLDN1,LIMS2,HES5
11_Member	GO Biological Processes	GO:0003338	metanephros morphogenesis	-2.55773	-0.831182	3/28	652,6608,388585	BMP4,SMO,HES5
11_Member	GO Biological Processes	GO:0048872	homeostasis of number of cells	-2.54097	-0.82062	8/236	652,1880,5423,6608,6722,27040,51301,80177	BMP4,GPR183,POLB,SMO,SRF,LAT,GCNT4,MYCT1
11_Member	GO Biological Processes	GO:0021532	neural tube patterning	-2.51353	-0.802772	3/29	652,2637,6608	BMP4,GBX2,SMO
11_Member	GO Biological Processes	GO:0072210	metanephric nephron development	-2.3905	-0.716212	3/32	652,6608,388585	BMP4,SMO,HES5
11_Member	GO Biological Processes	GO:0090183	regulation of kidney development	-2.3905	-0.716212	3/32	652,6608,7482	BMP4,SMO,WNT2B
11_Member	GO Biological Processes	GO:0002065	columnar/cuboidal epithelial cell differentiation	-2.07271	-0.486443	4/79	652,6608,6664,27077	BMP4,SMO,SOX11,B9D1
11_Member	GO Biological Processes	GO:0001656	metanephros development	-2.03521	-0.461581	4/81	652,2303,6608,388585	BMP4,FOXC2,SMO,HES5
11_Member	GO Biological Processes	GO:0048565	digestive tract development	-2.02251	-0.453972	5/127	652,2304,6608,6664,60529	BMP4,FOXE1,SMO,SOX11,ALX4
12_Summary	GO Biological Processes	GO:0033693	neurofilament bundle assembly	-5.99184	-3.25793	3/3	4741,4744,4747,3872,3875,4217,2535,4041,4700,4714,4715,7482,11315	NEFM,NEFH,NEFL,KRT17,KRT18,MAP3K5,FZD2,LRP5,NDUFA6,NDUFB8,NDUFB9,WNT2B,PARK7
12_Member	GO Biological Processes	GO:0033693	neurofilament bundle assembly	-5.99184	-3.25793	3/3	4741,4744,4747	NEFM,NEFH,NEFL
12_Member	GO Biological Processes	GO:0045110	intermediate filament bundle assembly	-4.46083	-2.13327	3/7	4741,4744,4747	NEFM,NEFH,NEFL
12_Member	GO Biological Processes	GO:0045104	intermediate filament cytoskeleton organization	-3.26103	-1.30528	5/66	3872,3875,4741,4744,4747	KRT17,KRT18,NEFM,NEFH,NEFL
12_Member	WikiPathways	WP2447	Amyotrophic lateral sclerosis (ALS)	-3.24137	-1.28914	4/38	4217,4741,4744,4747	MAP3K5,NEFM,NEFH,NEFL
12_Member	GO Biological Processes	GO:0045103	intermediate filament-based process	-3.2309	-1.28216	5/67	3872,3875,4741,4744,4747	KRT17,KRT18,NEFM,NEFH,NEFL
12_Member	GO Biological Processes	GO:0045109	intermediate filament organization	-3.07432	-1.17634	4/42	3872,4741,4744,4747	KRT17,NEFM,NEFH,NEFL
12_Member	WikiPathways	WP3680	Physico-chemical features and toxicity-associated pathways	-2.30133	-0.650998	4/68	2535,4741,4744,4747	FZD2,NEFM,NEFH,NEFL
12_Member	KEGG Pathway	hsa05022	Pathways of neurodegeneration - multiple diseases	-2.02103	-0.453223	11/476	2535,4041,4217,4700,4714,4715,4741,4744,4747,7482,11315	FZD2,LRP5,MAP3K5,NDUFA6,NDUFB8,NDUFB9,NEFM,NEFH,NEFL,WNT2B,PARK7
13_Summary	GO Biological Processes	GO:0043549	regulation of kinase activity	-5.96738	-3.24394	24/763	652,1022,1741,1969,2044,2065,2321,4041,4217,4915,5154,5575,8543,9052,9094,9618,9966,10125,11315,27040,29775,79616,83707,84632,2250,3976,4803,388585	BMP4,CDK7,DLG3,EPHA2,EPHA5,ERBB3,FLT1,LRP5,MAP3K5,NTRK2,PDGFA,PRKAR1B,LMO4,GPRC5A,UNC119,TRAF4,TNFSF15,RASGRP1,PARK7,LAT,CARD10,CCNJL,TRPT1,AFAP1L2,FGF5,LIF,NGF,HES5
13_Member	GO Biological Processes	GO:0043549	regulation of kinase activity	-5.96738	-3.24394	24/763	652,1022,1741,1969,2044,2065,2321,4041,4217,4915,5154,5575,8543,9052,9094,9618,9966,10125,11315,27040,29775,79616,83707,84632	BMP4,CDK7,DLG3,EPHA2,EPHA5,ERBB3,FLT1,LRP5,MAP3K5,NTRK2,PDGFA,PRKAR1B,LMO4,GPRC5A,UNC119,TRAF4,TNFSF15,RASGRP1,PARK7,LAT,CARD10,CCNJL,TRPT1,AFAP1L2
13_Member	GO Biological Processes	GO:0033674	positive regulation of kinase activity	-5.735	-3.07924	18/473	1741,1969,2044,2065,2321,4217,4915,5154,8543,9052,9094,9618,9966,10125,11315,27040,29775,84632	DLG3,EPHA2,EPHA5,ERBB3,FLT1,MAP3K5,NTRK2,PDGFA,LMO4,GPRC5A,UNC119,TRAF4,TNFSF15,RASGRP1,PARK7,LAT,CARD10,AFAP1L2
13_Member	GO Biological Processes	GO:0045859	regulation of protein kinase activity	-4.97163	-2.49418	20/645	652,1022,1741,2065,2321,4041,4217,5154,5575,9052,9094,9618,9966,10125,11315,27040,29775,79616,83707,84632	BMP4,CDK7,DLG3,ERBB3,FLT1,LRP5,MAP3K5,PDGFA,PRKAR1B,GPRC5A,UNC119,TRAF4,TNFSF15,RASGRP1,PARK7,LAT,CARD10,CCNJL,TRPT1,AFAP1L2
13_Member	GO Biological Processes	GO:0051347	positive regulation of transferase activity	-4.74465	-2.34245	18/559	1741,1969,2044,2065,2321,4217,4915,5154,8543,9052,9094,9618,9966,10125,11315,27040,29775,84632	DLG3,EPHA2,EPHA5,ERBB3,FLT1,MAP3K5,NTRK2,PDGFA,LMO4,GPRC5A,UNC119,TRAF4,TNFSF15,RASGRP1,PARK7,LAT,CARD10,AFAP1L2
13_Member	GO Biological Processes	GO:0001934	positive regulation of protein phosphorylation	-4.28083	-2.00837	20/722	652,1741,2065,2250,2321,3976,4217,4803,4915,5154,9052,9094,9618,9966,10125,11315,27040,29775,84632,388585	BMP4,DLG3,ERBB3,FGF5,FLT1,LIF,MAP3K5,NGF,NTRK2,PDGFA,GPRC5A,UNC119,TRAF4,TNFSF15,RASGRP1,PARK7,LAT,CARD10,AFAP1L2,HES5
13_Member	GO Biological Processes	GO:0045860	positive regulation of protein kinase activity	-4.27558	-2.00837	14/393	1741,2065,2321,4217,5154,9052,9094,9618,9966,10125,11315,27040,29775,84632	DLG3,ERBB3,FLT1,MAP3K5,PDGFA,GPRC5A,UNC119,TRAF4,TNFSF15,RASGRP1,PARK7,LAT,CARD10,AFAP1L2
13_Member	GO Biological Processes	GO:0061097	regulation of protein tyrosine kinase activity	-2.65446	-0.892107	5/90	1741,2065,9052,9094,84632	DLG3,ERBB3,GPRC5A,UNC119,AFAP1L2
13_Member	GO Biological Processes	GO:0061098	positive regulation of protein tyrosine kinase activity	-2.63499	-0.882268	4/55	1741,2065,9094,84632	DLG3,ERBB3,UNC119,AFAP1L2
13_Member	GO Biological Processes	GO:0050730	regulation of peptidyl-tyrosine phosphorylation	-2.27903	-0.636259	8/261	1741,2065,3976,5154,9052,9094,84632,388585	DLG3,ERBB3,LIF,PDGFA,GPRC5A,UNC119,AFAP1L2,HES5
14_Summary	GO Biological Processes	GO:0010001	glial cell differentiation	-5.93592	-3.23136	11/167	2065,2250,3691,4192,4915,6608,6664,9463,55553,57211,388585,23224,4744,4803,9076	ERBB3,FGF5,ITGB4,MDK,NTRK2,SMO,SOX11,PICK1,SOX6,ADGRG6,HES5,SYNE2,NEFH,NGF,CLDN1
14_Member	GO Biological Processes	GO:0010001	glial cell differentiation	-5.93592	-3.23136	11/167	2065,2250,3691,4192,4915,6608,6664,9463,55553,57211,388585	ERBB3,FGF5,ITGB4,MDK,NTRK2,SMO,SOX11,PICK1,SOX6,ADGRG6,HES5
14_Member	GO Biological Processes	GO:0042063	gliogenesis	-5.6834	-3.05272	12/214	2065,2250,3691,4192,4915,6608,6664,9463,23224,55553,57211,388585	ERBB3,FGF5,ITGB4,MDK,NTRK2,SMO,SOX11,PICK1,SYNE2,SOX6,ADGRG6,HES5
14_Member	GO Biological Processes	GO:0007422	peripheral nervous system development	-4.88234	-2.43328	7/77	2065,3691,4744,4803,4915,9076,57211	ERBB3,ITGB4,NEFH,NGF,NTRK2,CLDN1,ADGRG6
14_Member	GO Biological Processes	GO:0021782	glial cell development	-4.83979	-2.41167	8/108	3691,4192,4915,6608,6664,9463,57211,388585	ITGB4,MDK,NTRK2,SMO,SOX11,PICK1,ADGRG6,HES5
14_Member	GO Biological Processes	GO:0014037	Schwann cell differentiation	-3.33249	-1.35871	4/36	2065,3691,4915,57211	ERBB3,ITGB4,NTRK2,ADGRG6
14_Member	GO Biological Processes	GO:0022011	myelination in peripheral nervous system	-2.55773	-0.831182	3/28	3691,4915,57211	ITGB4,NTRK2,ADGRG6
14_Member	GO Biological Processes	GO:0032292	peripheral nervous system axon ensheathment	-2.55773	-0.831182	3/28	3691,4915,57211	ITGB4,NTRK2,ADGRG6
14_Member	GO Biological Processes	GO:0014044	Schwann cell development	-2.43003	-0.747042	3/31	3691,4915,57211	ITGB4,NTRK2,ADGRG6
14_Member	GO Biological Processes	GO:0048709	oligodendrocyte differentiation	-2.34758	-0.685741	4/66	4915,6664,55553,388585	NTRK2,SOX11,SOX6,HES5
15_Summary	GO Biological Processes	GO:0021537	telencephalon development	-5.80091	-3.12632	13/247	652,1749,2044,4192,4747,4915,6331,6513,6608,6722,9355,23224,388585,274,3897,3976,4803,6664,55679,114798,201294,2637,7482,1630,357,1282,1952,4826,55553,85446,84446,112,1969,4343,11178,57471,2065,11315,4217,7020	BMP4,DLX5,EPHA5,MDK,NEFL,NTRK2,SCN5A,SLC2A1,SMO,SRF,LHX2,SYNE2,HES5,BIN1,L1CAM,LIF,NGF,SOX11,LIMS2,SLITRK1,UNC13D,GBX2,WNT2B,DCC,SHROOM2,COL4A1,CELSR2,NNAT,SOX6,ZFHX2,BRSK1,ADCY6,EPHA2,MOV10,LZTS1,ERMN,ERBB3,PARK7,MAP3K5,TFAP2A
15_Member	GO Biological Processes	GO:0021537	telencephalon development	-5.80091	-3.12632	13/247	652,1749,2044,4192,4747,4915,6331,6513,6608,6722,9355,23224,388585	BMP4,DLX5,EPHA5,MDK,NEFL,NTRK2,SCN5A,SLC2A1,SMO,SRF,LHX2,SYNE2,HES5
15_Member	GO Biological Processes	GO:0010720	positive regulation of cell development	-5.6375	-3.01509	14/297	274,652,3897,3976,4192,4747,4803,4915,6608,6664,6722,55679,114798,201294	BIN1,BMP4,L1CAM,LIF,MDK,NEFL,NGF,NTRK2,SMO,SOX11,SRF,LIMS2,SLITRK1,UNC13D
15_Member	GO Biological Processes	GO:0030900	forebrain development	-5.12925	-2.6021	15/375	652,1749,2044,2637,4192,4747,4915,6331,6513,6608,6722,7482,9355,23224,388585	BMP4,DLX5,EPHA5,GBX2,MDK,NEFL,NTRK2,SCN5A,SLC2A1,SMO,SRF,WNT2B,LHX2,SYNE2,HES5
15_Member	GO Biological Processes	GO:0060284	regulation of cell development	-4.81034	-2.39388	17/500	274,652,1630,3897,3976,4192,4747,4803,4915,6608,6664,6722,9355,55679,114798,201294,388585	BIN1,BMP4,DCC,L1CAM,LIF,MDK,NEFL,NGF,NTRK2,SMO,SOX11,SRF,LHX2,LIMS2,SLITRK1,UNC13D,HES5
15_Member	GO Biological Processes	GO:0050769	positive regulation of neurogenesis	-4.75163	-2.34446	11/222	274,3897,3976,4192,4747,4803,4915,6608,6664,6722,114798	BIN1,L1CAM,LIF,MDK,NEFL,NGF,NTRK2,SMO,SOX11,SRF,SLITRK1
15_Member	GO Biological Processes	GO:0050767	regulation of neurogenesis	-4.67643	-2.28399	14/361	274,1630,3897,3976,4192,4747,4803,4915,6608,6664,6722,9355,114798,388585	BIN1,DCC,L1CAM,LIF,MDK,NEFL,NGF,NTRK2,SMO,SOX11,SRF,LHX2,SLITRK1,HES5
15_Member	GO Biological Processes	GO:0007420	brain development	-4.60299	-2.22944	21/742	357,652,1282,1749,1952,2044,2637,4192,4747,4826,4915,6331,6513,6608,6722,7482,9355,23224,55553,85446,388585	SHROOM2,BMP4,COL4A1,DLX5,CELSR2,EPHA5,GBX2,MDK,NEFL,NNAT,NTRK2,SCN5A,SLC2A1,SMO,SRF,WNT2B,LHX2,SYNE2,SOX6,ZFHX2,HES5
15_Member	GO Biological Processes	GO:0051960	regulation of nervous system development	-4.33464	-2.03717	15/439	274,1630,2637,3897,3976,4192,4747,4803,4915,6608,6664,6722,9355,114798,388585	BIN1,DCC,GBX2,L1CAM,LIF,MDK,NEFL,NGF,NTRK2,SMO,SOX11,SRF,LHX2,SLITRK1,HES5
15_Member	GO Biological Processes	GO:0060322	head development	-4.23581	-1.9895	21/787	357,652,1282,1749,1952,2044,2637,4192,4747,4826,4915,6331,6513,6608,6722,7482,9355,23224,55553,85446,388585	SHROOM2,BMP4,COL4A1,DLX5,CELSR2,EPHA5,GBX2,MDK,NEFL,NNAT,NTRK2,SCN5A,SLC2A1,SMO,SRF,WNT2B,LHX2,SYNE2,SOX6,ZFHX2,HES5
15_Member	GO Biological Processes	GO:0021543	pallium development	-4.22923	-1.98635	9/169	2044,4192,4747,4915,6513,6608,6722,9355,23224	EPHA5,MDK,NEFL,NTRK2,SLC2A1,SMO,SRF,LHX2,SYNE2
15_Member	GO Biological Processes	GO:0051962	positive regulation of nervous system development	-3.99598	-1.81365	11/269	274,3897,3976,4192,4747,4803,4915,6608,6664,6722,114798	BIN1,L1CAM,LIF,MDK,NEFL,NGF,NTRK2,SMO,SOX11,SRF,SLITRK1
15_Member	GO Biological Processes	GO:0050772	positive regulation of axonogenesis	-3.88284	-1.74028	6/77	3897,4747,4803,4915,6722,114798	L1CAM,NEFL,NGF,NTRK2,SRF,SLITRK1
15_Member	GO Biological Processes	GO:0021987	cerebral cortex development	-3.83479	-1.70559	7/112	4192,4747,4915,6513,6608,9355,23224	MDK,NEFL,NTRK2,SLC2A1,SMO,LHX2,SYNE2
15_Member	GO Biological Processes	GO:0050770	regulation of axonogenesis	-3.7454	-1.63927	8/154	1630,3897,4747,4803,4915,6722,84446,114798	DCC,L1CAM,NEFL,NGF,NTRK2,SRF,BRSK1,SLITRK1
15_Member	GO Biological Processes	GO:0021766	hippocampus development	-2.88104	-1.04221	5/80	2044,4192,4747,6608,6722	EPHA5,MDK,NEFL,SMO,SRF
15_Member	GO Biological Processes	GO:0031344	regulation of cell projection organization	-2.63427	-0.882268	15/639	112,1630,1969,3897,4192,4343,4747,4803,4915,6722,11178,23224,57471,84446,114798	ADCY6,DCC,EPHA2,L1CAM,MDK,MOV10,NEFL,NGF,NTRK2,SRF,LZTS1,SYNE2,ERMN,BRSK1,SLITRK1
15_Member	GO Biological Processes	GO:0043524	negative regulation of neuron apoptotic process	-2.43963	-0.750003	6/145	2065,4192,4747,4803,4915,11315	ERBB3,MDK,NEFL,NGF,NTRK2,PARK7
15_Member	GO Biological Processes	GO:0010975	regulation of neuron projection development	-2.32993	-0.66988	11/431	112,1630,3897,4192,4747,4803,4915,6722,11178,84446,114798	ADCY6,DCC,L1CAM,MDK,NEFL,NGF,NTRK2,SRF,LZTS1,BRSK1,SLITRK1
15_Member	GO Biological Processes	GO:1901214	regulation of neuron death	-2.32067	-0.663294	9/313	1630,2065,4192,4217,4747,4803,4915,7020,11315	DCC,ERBB3,MDK,MAP3K5,NEFL,NGF,NTRK2,TFAP2A,PARK7
15_Member	GO Biological Processes	GO:0021761	limbic system development	-2.31382	-0.66086	5/108	2044,4192,4747,6608,6722	EPHA5,MDK,NEFL,SMO,SRF
15_Member	GO Biological Processes	GO:0043523	regulation of neuron apoptotic process	-2.27973	-0.636259	7/207	2065,4192,4747,4803,4915,7020,11315	ERBB3,MDK,NEFL,NGF,NTRK2,TFAP2A,PARK7
16_Summary	GO Biological Processes	GO:0097435	supramolecular fiber organization	-5.73803	-3.07924	19/522	87,357,388,1465,2303,3872,4017,4629,4741,4744,4747,6722,7092,10788,11013,11155,11173,23616,57471,3781,5154,6331,9828,23224,23704,51421,203447	ACTN1,SHROOM2,RHOB,CSRP1,FOXC2,KRT17,LOXL2,MYH11,NEFM,NEFH,NEFL,SRF,TLL1,IQGAP2,TMSB15A,LDB3,ADAMTS7,SH3BP1,ERMN,KCNN2,PDGFA,SCN5A,ARHGEF17,SYNE2,KCNE4,AMOTL2,NRK
16_Member	GO Biological Processes	GO:0097435	supramolecular fiber organization	-5.73803	-3.07924	19/522	87,357,388,1465,2303,3872,4017,4629,4741,4744,4747,6722,7092,10788,11013,11155,11173,23616,57471	ACTN1,SHROOM2,RHOB,CSRP1,FOXC2,KRT17,LOXL2,MYH11,NEFM,NEFH,NEFL,SRF,TLL1,IQGAP2,TMSB15A,LDB3,ADAMTS7,SH3BP1,ERMN
16_Member	GO Biological Processes	GO:0030029	actin filament-based process	-4.8565	-2.4183	19/602	87,357,388,1465,3781,4629,5154,6331,6722,9828,10788,11013,11155,23224,23616,23704,51421,57471,203447	ACTN1,SHROOM2,RHOB,CSRP1,KCNN2,MYH11,PDGFA,SCN5A,SRF,ARHGEF17,IQGAP2,TMSB15A,LDB3,SYNE2,SH3BP1,KCNE4,AMOTL2,ERMN,NRK
16_Member	GO Biological Processes	GO:0030036	actin cytoskeleton organization	-3.35959	-1.37839	15/540	87,357,388,1465,4629,5154,6722,9828,10788,11013,11155,23616,51421,57471,203447	ACTN1,SHROOM2,RHOB,CSRP1,MYH11,PDGFA,SRF,ARHGEF17,IQGAP2,TMSB15A,LDB3,SH3BP1,AMOTL2,ERMN,NRK
16_Member	GO Biological Processes	GO:0007015	actin filament organization	-2.22126	-0.59141	8/267	87,357,388,6722,10788,11013,23616,57471	ACTN1,SHROOM2,RHOB,SRF,IQGAP2,TMSB15A,SH3BP1,ERMN
17_Summary	GO Biological Processes	GO:0090066	regulation of anatomical structure size	-5.55783	-2.95151	18/487	112,274,1621,1630,1907,2303,3055,3352,3779,3897,4747,4803,6722,11013,23108,23616,51571,64857,388,2044,3728,4192,5154,6331,7134,9463,10788,8045,60312	ADCY6,BIN1,DBH,DCC,EDN2,FOXC2,HCK,HTR1D,KCNMB1,L1CAM,NEFL,NGF,SRF,TMSB15A,RAP1GAP2,SH3BP1,CYRIB,PLEKHG2,RHOB,EPHA5,JUP,MDK,PDGFA,SCN5A,TNNC1,PICK1,IQGAP2,RASSF7,AFAP1
17_Member	GO Biological Processes	GO:0090066	regulation of anatomical structure size	-5.55783	-2.95151	18/487	112,274,1621,1630,1907,2303,3055,3352,3779,3897,4747,4803,6722,11013,23108,23616,51571,64857	ADCY6,BIN1,DBH,DCC,EDN2,FOXC2,HCK,HTR1D,KCNMB1,L1CAM,NEFL,NGF,SRF,TMSB15A,RAP1GAP2,SH3BP1,CYRIB,PLEKHG2
17_Member	GO Biological Processes	GO:0032970	regulation of actin filament-based process	-4.90147	-2.44688	15/392	274,388,2044,3055,3728,4192,5154,6331,7134,9463,10788,11013,23616,51571,64857	BIN1,RHOB,EPHA5,HCK,JUP,MDK,PDGFA,SCN5A,TNNC1,PICK1,IQGAP2,TMSB15A,SH3BP1,CYRIB,PLEKHG2
17_Member	GO Biological Processes	GO:0032535	regulation of cellular component size	-3.58121	-1.52899	12/351	274,1630,3055,3897,4747,4803,6722,11013,23108,23616,51571,64857	BIN1,DCC,HCK,L1CAM,NEFL,NGF,SRF,TMSB15A,RAP1GAP2,SH3BP1,CYRIB,PLEKHG2
17_Member	GO Biological Processes	GO:0032956	regulation of actin cytoskeleton organization	-3.58121	-1.52899	12/351	274,388,2044,3055,4192,5154,9463,10788,11013,23616,51571,64857	BIN1,RHOB,EPHA5,HCK,MDK,PDGFA,PICK1,IQGAP2,TMSB15A,SH3BP1,CYRIB,PLEKHG2
17_Member	GO Biological Processes	GO:0051493	regulation of cytoskeleton organization	-3.00184	-1.12202	14/525	274,388,2044,3055,4192,5154,8045,9463,10788,11013,23616,51571,60312,64857	BIN1,RHOB,EPHA5,HCK,MDK,PDGFA,RASSF7,PICK1,IQGAP2,TMSB15A,SH3BP1,CYRIB,AFAP1,PLEKHG2
17_Member	GO Biological Processes	GO:0008064	regulation of actin polymerization or depolymerization	-2.259	-0.619888	6/158	274,3055,11013,23616,51571,64857	BIN1,HCK,TMSB15A,SH3BP1,CYRIB,PLEKHG2
17_Member	GO Biological Processes	GO:0030832	regulation of actin filament length	-2.2459	-0.611124	6/159	274,3055,11013,23616,51571,64857	BIN1,HCK,TMSB15A,SH3BP1,CYRIB,PLEKHG2
18_Summary	GO Biological Processes	GO:0001667	ameboidal-type cell migration	-5.54769	-2.95133	11/183	1907,1947,2637,3691,4017,4041,6608,6722,51421,54345,201161,1969,4915,8463,2303,72,3976,5423,6598,7004,9394,27077,64359	EDN2,EFNB1,GBX2,ITGB4,LOXL2,LRP5,SMO,SRF,AMOTL2,SOX18,CENPV,EPHA2,NTRK2,TEAD2,FOXC2,ACTG2,LIF,POLB,SMARCB1,TEAD4,HS6ST1,B9D1,NXN
18_Member	GO Biological Processes	GO:0001667	ameboidal-type cell migration	-5.54769	-2.95133	11/183	1907,1947,2637,3691,4017,4041,6608,6722,51421,54345,201161	EDN2,EFNB1,GBX2,ITGB4,LOXL2,LRP5,SMO,SRF,AMOTL2,SOX18,CENPV
18_Member	GO Biological Processes	GO:0001570	vasculogenesis	-3.17218	-1.23903	5/69	1969,4915,6608,8463,54345	EPHA2,NTRK2,SMO,TEAD2,SOX18
18_Member	GO Biological Processes	GO:0035050	embryonic heart tube development	-2.8097	-1.00233	5/83	2303,6608,6722,8463,54345	FOXC2,SMO,SRF,TEAD2,SOX18
18_Member	GO Biological Processes	GO:0090130	tissue migration	-2.51297	-0.802772	5/97	72,1907,4017,6722,54345	ACTG2,EDN2,LOXL2,SRF,SOX18
18_Member	GO Biological Processes	GO:0043542	endothelial cell migration	-2.32425	-0.665986	4/67	1907,4017,6722,54345	EDN2,LOXL2,SRF,SOX18
18_Member	GO Biological Processes	GO:0003143	embryonic heart tube morphogenesis	-2.27879	-0.636259	4/69	6608,6722,8463,54345	SMO,SRF,TEAD2,SOX18
18_Member	GO Biological Processes	GO:0001701	in utero embryonic development	-2.24634	-0.611124	10/381	3976,5423,6598,6608,6722,7004,9394,27077,54345,64359	LIF,POLB,SMARCB1,SMO,SRF,TEAD4,HS6ST1,B9D1,SOX18,NXN
19_Summary	GO Biological Processes	GO:0035637	multicellular organismal signaling	-5.54214	-2.95133	9/116	274,1134,3728,3781,4915,6328,6331,23704,388591,1760,3756,5774,10962,11315,84866,1907,26251,1621,6722,7134,3814,85446	BIN1,CHRNA1,JUP,KCNN2,NTRK2,SCN3A,SCN5A,KCNE4,RNF207,DMPK,KCNH1,PTPN3,MLLT11,PARK7,TMEM25,EDN2,KCNG2,DBH,SRF,TNNC1,KISS1,ZFHX2
19_Member	GO Biological Processes	GO:0035637	multicellular organismal signaling	-5.54214	-2.95133	9/116	274,1134,3728,3781,4915,6328,6331,23704,388591	BIN1,CHRNA1,JUP,KCNN2,NTRK2,SCN3A,SCN5A,KCNE4,RNF207
19_Member	GO Biological Processes	GO:0042391	regulation of membrane potential	-4.49461	-2.15224	15/425	274,1134,1760,3728,3756,3781,4915,5774,6328,6331,10962,11315,23704,84866,388591	BIN1,CHRNA1,DMPK,JUP,KCNH1,KCNN2,NTRK2,PTPN3,SCN3A,SCN5A,MLLT11,PARK7,KCNE4,TMEM25,RNF207
19_Member	GO Biological Processes	GO:0061337	cardiac conduction	-4.25911	-2.00585	6/66	274,3728,3781,6331,23704,388591	BIN1,JUP,KCNN2,SCN5A,KCNE4,RNF207
19_Member	GO Biological Processes	GO:0008016	regulation of heart contraction	-3.56327	-1.51761	9/207	274,1760,1907,3728,3781,6331,23704,26251,388591	BIN1,DMPK,EDN2,JUP,KCNN2,SCN5A,KCNE4,KCNG2,RNF207
19_Member	GO Biological Processes	GO:1903522	regulation of blood circulation	-3.52407	-1.48982	10/256	274,1621,1760,1907,3728,3781,6331,23704,26251,388591	BIN1,DBH,DMPK,EDN2,JUP,KCNN2,SCN5A,KCNE4,KCNG2,RNF207
19_Member	GO Biological Processes	GO:0006937	regulation of muscle contraction	-3.45442	-1.44818	8/170	274,1760,1907,3728,6331,6722,7134,388591	BIN1,DMPK,EDN2,JUP,SCN5A,SRF,TNNC1,RNF207
19_Member	GO Biological Processes	GO:0086091	regulation of heart rate by cardiac conduction	-3.19781	-1.25894	4/39	274,3728,6331,23704	BIN1,JUP,SCN5A,KCNE4
19_Member	GO Biological Processes	GO:1903115	regulation of actin filament-based movement	-3.15549	-1.22711	4/40	274,3728,6331,7134	BIN1,JUP,SCN5A,TNNC1
19_Member	GO Biological Processes	GO:0044057	regulation of system process	-3.09659	-1.19238	15/573	274,1621,1760,1907,3728,3781,3814,6331,6722,7134,23704,26251,84866,85446,388591	BIN1,DBH,DMPK,EDN2,JUP,KCNN2,KISS1,SCN5A,SRF,TNNC1,KCNE4,KCNG2,TMEM25,ZFHX2,RNF207
19_Member	GO Biological Processes	GO:0086065	cell communication involved in cardiac conduction	-3.03535	-1.14654	4/43	3728,3781,6331,388591	JUP,KCNN2,SCN5A,RNF207
19_Member	GO Biological Processes	GO:0060307	regulation of ventricular cardiac muscle cell membrane repolarization	-2.70165	-0.925359	3/25	6331,23704,388591	SCN5A,KCNE4,RNF207
19_Member	GO Biological Processes	GO:0086019	cell-cell signaling involved in cardiac conduction	-2.60372	-0.861259	3/27	3781,6331,388591	KCNN2,SCN5A,RNF207
19_Member	GO Biological Processes	GO:0098900	regulation of action potential	-2.57804	-0.844894	4/57	274,3728,6331,388591	BIN1,JUP,SCN5A,RNF207
19_Member	GO Biological Processes	GO:0006942	regulation of striated muscle contraction	-2.53242	-0.815145	5/96	274,1760,3728,6331,388591	BIN1,DMPK,JUP,SCN5A,RNF207
19_Member	GO Biological Processes	GO:0099623	regulation of cardiac muscle cell membrane repolarization	-2.471	-0.773402	3/30	6331,23704,388591	SCN5A,KCNE4,RNF207
19_Member	GO Biological Processes	GO:0090257	regulation of muscle system process	-2.38988	-0.716212	8/250	274,1760,1907,3728,6331,6722,7134,388591	BIN1,DMPK,EDN2,JUP,SCN5A,SRF,TNNC1,RNF207
19_Member	GO Biological Processes	GO:0002027	regulation of heart rate	-2.3656	-0.696522	5/105	274,1907,3728,6331,23704	BIN1,EDN2,JUP,SCN5A,KCNE4
19_Member	GO Biological Processes	GO:0086004	regulation of cardiac muscle cell contraction	-2.31543	-0.66086	3/34	274,3728,6331	BIN1,JUP,SCN5A
19_Member	GO Biological Processes	GO:0086002	cardiac muscle cell action potential involved in contraction	-2.17915	-0.566464	3/38	3781,6331,23704	KCNN2,SCN5A,KCNE4
19_Member	GO Biological Processes	GO:0060048	cardiac muscle contraction	-2.15121	-0.5441	4/75	3781,6331,7134,23704	KCNN2,SCN5A,TNNC1,KCNE4
19_Member	GO Biological Processes	GO:0060306	regulation of membrane repolarization	-2.1476	-0.542854	3/39	6331,23704,388591	SCN5A,KCNE4,RNF207
19_Member	GO Biological Processes	GO:0055117	regulation of cardiac muscle contraction	-2.11135	-0.515946	4/77	274,3728,6331,388591	BIN1,JUP,SCN5A,RNF207
19_Member	GO Biological Processes	GO:0086003	cardiac muscle cell contraction	-2.02998	-0.458541	3/43	3781,6331,23704	KCNN2,SCN5A,KCNE4
20_Summary	GO Biological Processes	GO:0021915	neural tube development	-5.46928	-2.89344	10/151	652,1969,2535,2637,6608,6664,8463,8543,9355,388585,2304,7020,1749,60529	BMP4,EPHA2,FZD2,GBX2,SMO,SOX11,TEAD2,LMO4,LHX2,HES5,FOXE1,TFAP2A,DLX5,ALX4
20_Member	GO Biological Processes	GO:0021915	neural tube development	-5.46928	-2.89344	10/151	652,1969,2535,2637,6608,6664,8463,8543,9355,388585	BMP4,EPHA2,FZD2,GBX2,SMO,SOX11,TEAD2,LMO4,LHX2,HES5
20_Member	GO Biological Processes	GO:0060022	hard palate development	-4.25998	-2.00585	3/8	2304,2535,6664	FOXE1,FZD2,SOX11
20_Member	GO Biological Processes	GO:0016331	morphogenesis of embryonic epithelium	-3.96778	-1.80313	8/143	652,2535,6664,7020,8463,8543,9355,388585	BMP4,FZD2,SOX11,TFAP2A,TEAD2,LMO4,LHX2,HES5
20_Member	GO Biological Processes	GO:0001838	embryonic epithelial tube formation	-3.60502	-1.53249	7/122	652,2535,6664,8463,8543,9355,388585	BMP4,FZD2,SOX11,TEAD2,LMO4,LHX2,HES5
20_Member	GO Biological Processes	GO:0060021	roof of mouth development	-3.48508	-1.47083	6/91	1749,2304,2535,6664,7020,60529	DLX5,FOXE1,FZD2,SOX11,TFAP2A,ALX4
20_Member	GO Biological Processes	GO:0072175	epithelial tube formation	-3.43685	-1.43456	7/130	652,2535,6664,8463,8543,9355,388585	BMP4,FZD2,SOX11,TEAD2,LMO4,LHX2,HES5
20_Member	GO Biological Processes	GO:0001841	neural tube formation	-3.19738	-1.25894	6/103	652,2535,6664,8463,8543,9355	BMP4,FZD2,SOX11,TEAD2,LMO4,LHX2
20_Member	GO Biological Processes	GO:0035148	tube formation	-3.13531	-1.22007	7/146	652,2535,6664,8463,8543,9355,388585	BMP4,FZD2,SOX11,TEAD2,LMO4,LHX2,HES5
20_Member	GO Biological Processes	GO:0001843	neural tube closure	-2.67575	-0.909985	5/89	652,2535,8463,8543,9355	BMP4,FZD2,TEAD2,LMO4,LHX2
20_Member	GO Biological Processes	GO:0060606	tube closure	-2.65446	-0.892107	5/90	652,2535,8463,8543,9355	BMP4,FZD2,TEAD2,LMO4,LHX2
20_Member	GO Biological Processes	GO:0062009	secondary palate development	-2.65164	-0.891541	3/26	2304,2535,6664	FOXE1,FZD2,SOX11
20_Member	GO Biological Processes	GO:0014020	primary neural tube formation	-2.55212	-0.827645	5/95	652,2535,8463,8543,9355	BMP4,FZD2,TEAD2,LMO4,LHX2
20_Member	GO Biological Processes	GO:0003281	ventricular septum development	-2.19236	-0.574837	4/73	652,2535,6664,8543	BMP4,FZD2,SOX11,LMO4
20_Member	GO Biological Processes	GO:0060412	ventricular septum morphogenesis	-2.05818	-0.479395	3/42	652,2535,6664	BMP4,FZD2,SOX11
