# Supplementary material for: Transcriptional profiling of Hutchinson-Gilford Progeria syndrome fibroblasts reveals deficits in mesenchymal stem cell commitment to differentiation related to early events in endochondral ossification
Source: eLife journal article supplement (doi:10.7554/elife.81290), 2022-12-29
Supplement: table2-data1 [file metascape_result.xlsx]

## Sheet: Annotation
MyList	Gene ID	Type	Tax ID	Homologene Gene ID	Homologene Gene Tax ID	Gene Symbol	Description	Biological Process (GO)	Kinase Class (UniProt)	Protein Function (Protein Atlas)	Subcellular Location (Protein Atlas)	Drug (DrugBank)	Canonical Pathways	Hallmark Gene Sets	R-HSA-3214815 HDACs deacetylate histones	R-HSA-5689880 Ub-specific processing proteas	R-HSA-1266695 Interleukin-7 signaling	R-HSA-140342 Apoptosis induced DNA fragment	R-HSA-8866654 E3 ubiquitin ligases ubiquitin	GO:0045860 positive regulation of protein	GO:0043280 positive regulation of cystein	GO:0050920 regulation of chemotaxis	GO:0030509 BMP signaling pathway	hsa04260 Cardiac muscle contraction	GO:0021510 spinal cord development	GO:0008285 negative regulation of cell po
RASGRP1	10125	symbol	H. sapiens	10125	H. sapiens	RASGRP1	RAS guanyl releasing protein 1	GO:0032825 positive regulation of natural killer cell differentiation;GO:0033089 positive regulation of T cell differentiation in thymus;GO:0032252 secretory granule localization		RAS pathway related proteins; Predicted intracellular proteins; Disease related genes	Cytosol (Supported); Additional: Plasma membrane		(M269)PID RAS PATHWAY; (M88)PID CD8 TCR PATHWAY; (M34)PID TCR PATHWAY	(M5941)HALLMARK UV RESPONSE UP; (M5906)HALLMARK ESTROGEN RESPONSE EARLY; (M5921)HALLMARK COMPLEMENT	1.0	0.0	1.0	0.0	0.0	1.0	0.0	0.0	0.0	0.0	0.0	0.0
HIST1H4F	8361	gene_synonym	H. sapiens	8361	H. sapiens	H4C6	H4 clustered histone 6	GO:0045653 negative regulation of megakaryocyte differentiation;GO:0006335 DNA replication-dependent chromatin assembly;GO:0034723 DNA replication-dependent chromatin organization		Predicted intracellular proteins; Disease related genes					1.0	0.0	0.0	0.0	0.0	0.0	0.0	0.0	0.0	0.0	0.0	0.0
HIST1H2AD	3013	gene_synonym	H. sapiens	3013	H. sapiens	H2AC7	H2A clustered histone 7	GO:0008150 biological_process		Predicted intracellular proteins	Nucleoplasm (Approved)				1.0	1.0	0.0	0.0	0.0	0.0	0.0	0.0	0.0	0.0	0.0	0.0
HIST1H1A	3024	gene_synonym	H. sapiens	3024	H. sapiens	H1-1	H1.1 linker histone, cluster member	GO:0016584 nucleosome positioning;GO:0030261 chromosome condensation;GO:0045910 negative regulation of DNA recombination		Predicted intracellular proteins	Nucleoplasm (Supported)				1.0	0.0	0.0	1.0	0.0	0.0	0.0	0.0	0.0	0.0	0.0	0.0
NPAP1	23742	symbol	H. sapiens	23742	H. sapiens	NPAP1	nuclear pore associated protein 1	GO:0006405 RNA export from nucleus;GO:0006606 protein import into nucleus;GO:0051170 import into nucleus		Transporters:Transporter channels and pores; Predicted intracellular proteins	Nucleoplasm (Supported); Additional: Plasma membrane;Vesicles				0.0	0.0	0.0	0.0	0.0	0.0	0.0	0.0	0.0	0.0	0.0	0.0
SNORA49	677829	symbol	H. sapiens	677829	H. sapiens	SNORA49	small nucleolar RNA, H/ACA box 49	GO:0006396 RNA processing;GO:0016070 RNA metabolic process;GO:0010467 gene expression							0.0	0.0	0.0	0.0	0.0	0.0	0.0	0.0	0.0	0.0	0.0	0.0
HMX3	340784	symbol	H. sapiens	340784	H. sapiens	HMX3	H6 family homeobox 3	GO:0007566 embryo implantation;GO:0050885 neuromuscular process controlling balance;GO:0060135 maternal process involved in female pregnancy		Transcription factors:Helix-turn-helix domains; Predicted intracellular proteins	Nucleoplasm (Approved); Additional: Centriolar satellite				0.0	0.0	0.0	0.0	0.0	0.0	0.0	0.0	0.0	0.0	0.0	0.0
HIST1H4K	8362	gene_synonym	H. sapiens	8362	H. sapiens	H4C12	H4 clustered histone 12	GO:0045653 negative regulation of megakaryocyte differentiation;GO:0006335 DNA replication-dependent chromatin assembly;GO:0034723 DNA replication-dependent chromatin organization		Predicted intracellular proteins; Disease related genes					1.0	0.0	0.0	0.0	0.0	0.0	0.0	0.0	0.0	0.0	0.0	0.0
SNORA54	677833	symbol	H. sapiens	677833	H. sapiens	SNORA54	small nucleolar RNA, H/ACA box 54	GO:0006396 RNA processing;GO:0016070 RNA metabolic process;GO:0010467 gene expression							0.0	0.0	0.0	0.0	0.0	0.0	0.0	0.0	0.0	0.0	0.0	0.0
SNORA71D	677840	symbol	H. sapiens	677840	H. sapiens	SNORA71D	small nucleolar RNA, H/ACA box 71D	GO:0006396 RNA processing;GO:0016070 RNA metabolic process;GO:0010467 gene expression							0.0	0.0	0.0	0.0	0.0	0.0	0.0	0.0	0.0	0.0	0.0	0.0
RPPH1	85495	symbol	H. sapiens	85495	H. sapiens	RPPH1	ribonuclease P RNA component H1	GO:0090502 RNA phosphodiester bond hydrolysis, endonucleolytic;GO:0008033 tRNA processing;GO:0090501 RNA phosphodiester bond hydrolysis							0.0	0.0	0.0	0.0	0.0	0.0	0.0	0.0	0.0	0.0	0.0	0.0
MAP3K5	4217	symbol	H. sapiens	4217	H. sapiens	MAP3K5	mitogen-activated protein kinase kinase kinase 5	GO:0072577 endothelial cell apoptotic process;GO:0038066 p38MAPK cascade;GO:0010663 positive regulation of striated muscle cell apoptotic process	STE Ser/Thr protein kinase family	Enzymes; Kinases:STE Ser/Thr protein kinases; Predicted intracellular proteins; ENZYME proteins:Transferases	Cytosol (Supported)		(M20)PID P38 MKK3 6PATHWAY; (M197)PID HIV NEF PATHWAY; (M249)PID PI3KCI AKT PATHWAY		1.0	0.0	0.0	0.0	0.0	1.0	1.0	0.0	0.0	0.0	0.0	0.0
RMRP	6023	symbol	H. sapiens	6023	H. sapiens	RMRP	RNA component of mitochondrial RNA processing endoribonuclease	GO:0062103 double-stranded RNA biosynthetic process;GO:1903704 negative regulation of production of siRNA involved in RNA interference;GO:1900369 negative regulation of RNA interference							1.0	0.0	0.0	0.0	0.0	0.0	0.0	0.0	0.0	0.0	0.0	0.0
SNORA73B	26768	symbol	H. sapiens	26768	H. sapiens	SNORA73B	small nucleolar RNA, H/ACA box 73B	GO:0006396 RNA processing;GO:0016070 RNA metabolic process;GO:0010467 gene expression							0.0	0.0	0.0	0.0	0.0	0.0	0.0	0.0	0.0	0.0	0.0	0.0
HIST1H3H	8357	gene_synonym	H. sapiens	8357	H. sapiens	H3C10	H3 clustered histone 10	GO:0006335 DNA replication-dependent chromatin assembly;GO:0034723 DNA replication-dependent chromatin organization;GO:0032200 telomere organization		Predicted intracellular proteins; Disease related genes					1.0	0.0	1.0	0.0	0.0	0.0	0.0	0.0	0.0	0.0	0.0	0.0
HIST1H3D	8351	gene_synonym	H. sapiens	8351	H. sapiens	H3C4	H3 clustered histone 4	GO:0006335 DNA replication-dependent chromatin assembly;GO:0034723 DNA replication-dependent chromatin organization;GO:0032200 telomere organization		Predicted intracellular proteins; Disease related genes					1.0	0.0	1.0	0.0	0.0	0.0	0.0	0.0	0.0	0.0	0.0	0.0
HIST1H1B	3009	gene_synonym	H. sapiens	3009	H. sapiens	H1-5	H1.5 linker histone, cluster member	GO:0071169 establishment of protein localization to chromatin;GO:0051574 positive regulation of histone H3-K9 methylation;GO:0070199 establishment of protein localization to chromosome		Predicted intracellular proteins	Nucleoplasm (Supported)				1.0	0.0	0.0	1.0	0.0	0.0	0.0	0.0	0.0	0.0	0.0	0.0
EPGN	255324	symbol	H. sapiens	255324	H. sapiens	EPGN	epithelial mitogen	GO:0045741 positive regulation of epidermal growth factor-activated receptor activity;GO:0007176 regulation of epidermal growth factor-activated receptor activity;GO:0045742 positive regulation of epidermal growth factor receptor signaling pathway		Predicted secreted proteins; Predicted intracellular proteins	Cytosol;Nucleoplasm (Approved); Additional: Vesicles		(M5883)NABA SECRETED FACTORS; (M5885)NABA MATRISOME ASSOCIATED; (M5889)NABA MATRISOME		1.0	0.0	0.0	0.0	0.0	1.0	0.0	0.0	1.0	0.0	0.0	0.0
F2R	2149	symbol	H. sapiens	2149	H. sapiens	F2R	coagulation factor II thrombin receptor	GO:1900134 negative regulation of renin secretion into blood stream;GO:0007529 establishment of synaptic specificity at neuromuscular junction;GO:0099552 trans-synaptic signaling by lipid, modulating synaptic transmission		G-protein coupled receptors:GPCRs excl olfactory receptors; FDA approved drug targets:Small molecule drugs; Predicted intracellular proteins		Streptokinase; SR-123781A; Vorapaxar; Thrombin	(M238)PID THROMBIN PAR1 PATHWAY	(M5902)HALLMARK APOPTOSIS; (M5939)HALLMARK P53 PATHWAY; (M5950)HALLMARK ALLOGRAFT REJECTION	0.0	0.0	1.0	0.0	0.0	1.0	1.0	1.0	0.0	0.0	0.0	1.0
HIST1H4E	8367	gene_synonym	H. sapiens	8367	H. sapiens	H4C5	H4 clustered histone 5	GO:0045653 negative regulation of megakaryocyte differentiation;GO:0006335 DNA replication-dependent chromatin assembly;GO:0034723 DNA replication-dependent chromatin organization		Predicted intracellular proteins; Disease related genes					1.0	0.0	0.0	0.0	0.0	0.0	0.0	0.0	0.0	0.0	0.0	0.0
MIR663AHG	284801	symbol	H. sapiens	284801	H. sapiens	MIR663AHG	MIR663A host gene								0.0	0.0	0.0	0.0	0.0	0.0	0.0	0.0	0.0	0.0	0.0	0.0
MTRNR2L1	100462977	symbol	H. sapiens	100462977	H. sapiens	MTRNR2L1	MT-RNR2 like 1 (pseudogene)	GO:1900118 negative regulation of execution phase of apoptosis;GO:1900117 regulation of execution phase of apoptosis;GO:2000272 negative regulation of signaling receptor activity		Predicted secreted proteins; Predicted intracellular proteins					0.0	0.0	0.0	0.0	0.0	0.0	0.0	0.0	0.0	0.0	0.0	0.0
PLXDC1	57125	symbol	H. sapiens	57125	H. sapiens	PLXDC1	plexin domain containing 1	GO:0021510 spinal cord development;GO:0001525 angiogenesis;GO:0048514 blood vessel morphogenesis		Predicted intracellular proteins			(M5880)NABA ECM AFFILIATED; (M5885)NABA MATRISOME ASSOCIATED; (M5889)NABA MATRISOME		0.0	0.0	0.0	0.0	0.0	0.0	0.0	0.0	0.0	0.0	1.0	0.0
BMP8B	656	symbol	H. sapiens	656	H. sapiens	BMP8B	bone morphogenetic protein 8b	GO:0010862 positive regulation of pathway-restricted SMAD protein phosphorylation;GO:0060395 SMAD protein signal transduction;GO:0060393 regulation of pathway-restricted SMAD protein phosphorylation		Predicted secreted proteins	Vesicles (Approved)		(M5883)NABA SECRETED FACTORS; (M5885)NABA MATRISOME ASSOCIATED; (M5889)NABA MATRISOME		0.0	0.0	0.0	0.0	0.0	1.0	0.0	0.0	1.0	0.0	0.0	0.0
HIST1H2BG	3017	gene_synonym	H. sapiens	3017	H. sapiens	H2BC5	H2B clustered histone 5	GO:0006334 nucleosome assembly;GO:0031497 chromatin assembly;GO:0034728 nucleosome organization		Predicted intracellular proteins	Nucleoplasm (Approved); Additional: Cytosol				1.0	1.0	0.0	0.0	1.0	0.0	0.0	0.0	0.0	0.0	0.0	0.0
HIST1H3C	8352	gene_synonym	H. sapiens	8352	H. sapiens	H3C3	H3 clustered histone 3	GO:0006335 DNA replication-dependent chromatin assembly;GO:0034723 DNA replication-dependent chromatin organization;GO:0032200 telomere organization		Predicted intracellular proteins; Disease related genes					1.0	0.0	1.0	0.0	0.0	0.0	0.0	0.0	0.0	0.0	0.0	0.0
ANKRD30BL	554226	symbol	H. sapiens	554226	H. sapiens	ANKRD30BL	ankyrin repeat domain 30B like			Predicted intracellular proteins					0.0	0.0	0.0	0.0	0.0	0.0	0.0	0.0	0.0	0.0	0.0	0.0
SCARNA2	677766	symbol	H. sapiens	677766	H. sapiens	SCARNA2	small Cajal body-specific RNA 2	GO:0006396 RNA processing;GO:0016070 RNA metabolic process;GO:0010467 gene expression							0.0	0.0	0.0	0.0	0.0	0.0	0.0	0.0	0.0	0.0	0.0	0.0
HIST1H3B	8358	gene_synonym	H. sapiens	8358	H. sapiens	H3C2	H3 clustered histone 2	GO:0006335 DNA replication-dependent chromatin assembly;GO:0034723 DNA replication-dependent chromatin organization;GO:0032200 telomere organization		Predicted intracellular proteins; Cancer-related genes; Disease related genes					1.0	0.0	1.0	0.0	0.0	0.0	0.0	0.0	0.0	0.0	0.0	0.0
SNORA63	6043	symbol	H. sapiens	6043	H. sapiens	SNORA63	small nucleolar RNA, H/ACA box 63	GO:0006396 RNA processing;GO:0016070 RNA metabolic process;GO:0010467 gene expression							0.0	0.0	0.0	0.0	0.0	0.0	0.0	0.0	0.0	0.0	0.0	0.0
HIST1H4H	8365	gene_synonym	H. sapiens	8365	H. sapiens	H4C8	H4 clustered histone 8	GO:0045653 negative regulation of megakaryocyte differentiation;GO:0006335 DNA replication-dependent chromatin assembly;GO:0034723 DNA replication-dependent chromatin organization		Predicted intracellular proteins; Disease related genes					1.0	0.0	0.0	0.0	0.0	0.0	0.0	0.0	0.0	0.0	0.0	0.0
HIST1H4C	8364	gene_synonym	H. sapiens	8364	H. sapiens	H4C3	H4 clustered histone 3	GO:0045653 negative regulation of megakaryocyte differentiation;GO:0006335 DNA replication-dependent chromatin assembly;GO:0034723 DNA replication-dependent chromatin organization		Predicted intracellular proteins; Disease related genes				(M5945)HALLMARK HEME METABOLISM	1.0	0.0	0.0	0.0	0.0	0.0	0.0	0.0	0.0	0.0	0.0	0.0
SNORA48	652965	symbol	H. sapiens	652965	H. sapiens	SNORA48	small nucleolar RNA, H/ACA box 48	GO:0006396 RNA processing;GO:0016070 RNA metabolic process;GO:0010467 gene expression							0.0	0.0	0.0	0.0	0.0	0.0	0.0	0.0	0.0	0.0	0.0	0.0
HIST1H2AG	8969	gene_synonym	H. sapiens	8969	H. sapiens	H2AC11	H2A clustered histone 11	GO:0008150 biological_process		Predicted intracellular proteins	Nucleoplasm (Approved)				1.0	1.0	0.0	0.0	0.0	0.0	0.0	0.0	0.0	0.0	0.0	0.0
HIST1H2BC	3017	gene_synonym	H. sapiens	3017	H. sapiens	H2BC5	H2B clustered histone 5	GO:0006334 nucleosome assembly;GO:0031497 chromatin assembly;GO:0034728 nucleosome organization		Predicted intracellular proteins	Nucleoplasm (Approved); Additional: Cytosol				1.0	1.0	0.0	0.0	1.0	0.0	0.0	0.0	0.0	0.0	0.0	0.0
WNT5A	7474	symbol	H. sapiens	7474	H. sapiens	WNT5A	Wnt family member 5A	GO:0036517 chemoattraction of serotonergic neuron axon;GO:0061341 non-canonical Wnt signaling pathway involved in heart development;GO:0061346 planar cell polarity pathway involved in heart morphogenesis		Human disease related genes:Congenital malformations:Other congenital malformations; Predicted secreted proteins; Disease related genes			(M77)PID WNT SIGNALING PATHWAY; (M23)PID WNT NONCANONICAL PATHWAY; (M254)PID MYC REPRESS PATHWAY	(M5903)HALLMARK NOTCH SIGNALING; (M5930)HALLMARK EPITHELIAL MESENCHYMAL TRANSITION	1.0	0.0	0.0	0.0	0.0	1.0	0.0	1.0	1.0	0.0	0.0	1.0
HIST1H2AI	8329	gene_synonym	H. sapiens	8329	H. sapiens	H2AC13	H2A clustered histone 13	GO:0008150 biological_process		Predicted intracellular proteins	Nucleoplasm (Approved)				1.0	1.0	0.0	0.0	0.0	0.0	0.0	0.0	0.0	0.0	0.0	0.0
HIST1H3E	8353	gene_synonym	H. sapiens	8353	H. sapiens	H3C6	H3 clustered histone 6	GO:0006335 DNA replication-dependent chromatin assembly;GO:0034723 DNA replication-dependent chromatin organization;GO:0032200 telomere organization		Predicted intracellular proteins; Disease related genes					1.0	0.0	1.0	0.0	0.0	0.0	0.0	0.0	0.0	0.0	0.0	0.0
HIST1H2BJ	8970	gene_synonym	H. sapiens	8970	H. sapiens	H2BC11	H2B clustered histone 11	GO:0002227 innate immune response in mucosa;GO:0010804 negative regulation of tumor necrosis factor-mediated signaling pathway;GO:0002385 mucosal immune response		Predicted intracellular proteins	Nucleoplasm (Approved); Additional: Cytosol				1.0	1.0	0.0	0.0	1.0	0.0	0.0	0.0	0.0	0.0	0.0	0.0
HIST1H4D	8360	gene_synonym	H. sapiens	8360	H. sapiens	H4C4	H4 clustered histone 4	GO:0045653 negative regulation of megakaryocyte differentiation;GO:0006335 DNA replication-dependent chromatin assembly;GO:0034723 DNA replication-dependent chromatin organization		Predicted intracellular proteins; Disease related genes					1.0	0.0	0.0	0.0	0.0	0.0	0.0	0.0	0.0	0.0	0.0	0.0
LONRF2	164832	symbol	H. sapiens	164832	H. sapiens	LONRF2	LON peptidase N-terminal domain and ring finger 2			Predicted intracellular proteins	Nucleoplasm (Approved)				0.0	0.0	0.0	0.0	0.0	0.0	0.0	0.0	0.0	0.0	0.0	0.0
HIST1H2AE	3012	gene_synonym	H. sapiens	3012	H. sapiens	H2AC8	H2A clustered histone 8	GO:0008285 negative regulation of cell population proliferation;GO:0042127 regulation of cell population proliferation;GO:0048523 negative regulation of cellular process		Predicted intracellular proteins	Nucleoplasm (Supported)				1.0	1.0	0.0	0.0	0.0	0.0	0.0	0.0	0.0	0.0	0.0	1.0
HIST1H2BD	3017	gene_synonym	H. sapiens	3017	H. sapiens	H2BC5	H2B clustered histone 5	GO:0006334 nucleosome assembly;GO:0031497 chromatin assembly;GO:0034728 nucleosome organization		Predicted intracellular proteins	Nucleoplasm (Approved); Additional: Cytosol				1.0	1.0	0.0	0.0	1.0	0.0	0.0	0.0	0.0	0.0	0.0	0.0
HIST1H2AH	85235	gene_synonym	H. sapiens	85235	H. sapiens	H2AC12	H2A clustered histone 12	GO:0008150 biological_process		Predicted intracellular proteins	Nucleoplasm (Approved)				1.0	1.0	0.0	0.0	0.0	0.0	0.0	0.0	0.0	0.0	0.0	0.0
HIST1H1E	3008	gene_synonym	H. sapiens	3008	H. sapiens	H1-4	H1.4 linker histone, cluster member	GO:0098532 histone H3-K27 trimethylation;GO:0070734 histone H3-K27 methylation;GO:0016584 nucleosome positioning		Predicted intracellular proteins; Disease related genes	Nuclear speckles (Supported)	Copper	(M32)PID HDAC CLASSIII PATHWAY		1.0	0.0	0.0	1.0	0.0	0.0	0.0	0.0	0.0	0.0	0.0	0.0
HIST1H1D	3007	gene_synonym	H. sapiens	3007	H. sapiens	H1-3	H1.3 linker histone, cluster member	GO:0098532 histone H3-K27 trimethylation;GO:0070734 histone H3-K27 methylation;GO:0016584 nucleosome positioning		Predicted intracellular proteins					1.0	0.0	0.0	1.0	0.0	0.0	0.0	0.0	0.0	0.0	0.0	0.0
CD4	920	symbol	H. sapiens	920	H. sapiens	CD4	CD4 molecule	GO:0035397 helper T cell enhancement of adaptive immune response;GO:0035723 interleukin-15-mediated signaling pathway;GO:0071350 cellular response to interleukin-15		Transporters:Accessory Factors Involved in Transport; FDA approved drug targets:Biotech drugs; Predicted intracellular proteins; CD markers	Plasma membrane (Approved)	Antithymocyte immunoglobulin (rabbit); Clenoliximab; Ibalizumab	(M243)PID ARF 3PATHWAY; (M290)PID IL12 STAT4 PATHWAY; (M196)PID IL23 PATHWAY	(M5950)HALLMARK ALLOGRAFT REJECTION	1.0	0.0	1.0	0.0	0.0	1.0	0.0	0.0	1.0	0.0	0.0	0.0
HIST1H2AM	8336	gene_synonym	H. sapiens	8336	H. sapiens	H2AC17	H2A clustered histone 17	GO:0008150 biological_process		Predicted intracellular proteins	Nucleoplasm (Approved)				1.0	1.0	0.0	0.0	0.0	0.0	0.0	0.0	0.0	0.0	0.0	0.0
HIST1H3G	8355	gene_synonym	H. sapiens	8355	H. sapiens	H3C8	H3 clustered histone 8	GO:0006335 DNA replication-dependent chromatin assembly;GO:0034723 DNA replication-dependent chromatin organization;GO:0032200 telomere organization		Predicted intracellular proteins; Disease related genes					1.0	0.0	1.0	0.0	0.0	0.0	0.0	0.0	0.0	0.0	0.0	0.0
SCARNA12	677777	symbol	H. sapiens	677777	H. sapiens	SCARNA12	small Cajal body-specific RNA 12	GO:0006396 RNA processing;GO:0016070 RNA metabolic process;GO:0010467 gene expression							0.0	0.0	0.0	0.0	0.0	0.0	0.0	0.0	0.0	0.0	0.0	0.0
HIST1H2AK	8330	gene_synonym	H. sapiens	8330	H. sapiens	H2AC15	H2A clustered histone 15	GO:0008150 biological_process		Predicted intracellular proteins	Nucleoplasm (Approved)				1.0	1.0	0.0	0.0	0.0	0.0	0.0	0.0	0.0	0.0	0.0	0.0
HIST1H3F	8968	gene_synonym	H. sapiens	8968	H. sapiens	H3C7	H3 clustered histone 7	GO:0006335 DNA replication-dependent chromatin assembly;GO:0034723 DNA replication-dependent chromatin organization;GO:0032200 telomere organization		Predicted intracellular proteins; Disease related genes					1.0	0.0	1.0	0.0	0.0	0.0	0.0	0.0	0.0	0.0	0.0	0.0
HIST1H2BE	3017	gene_synonym	H. sapiens	3017	H. sapiens	H2BC5	H2B clustered histone 5	GO:0006334 nucleosome assembly;GO:0031497 chromatin assembly;GO:0034728 nucleosome organization		Predicted intracellular proteins	Nucleoplasm (Approved); Additional: Cytosol				1.0	1.0	0.0	0.0	1.0	0.0	0.0	0.0	0.0	0.0	0.0	0.0
HIST2H2AC	8338	gene_synonym	H. sapiens	8338	H. sapiens	H2AC20	H2A clustered histone 20	GO:0008150 biological_process		Predicted intracellular proteins	Nucleoplasm (Approved)				1.0	1.0	0.0	0.0	0.0	0.0	0.0	0.0	0.0	0.0	0.0	0.0
CMKLR1	1240	symbol	H. sapiens	1240	H. sapiens	CMKLR1	chemerin chemokine-like receptor 1	GO:0002430 complement receptor mediated signaling pathway;GO:0010759 positive regulation of macrophage chemotaxis;GO:0032695 negative regulation of interleukin-12 production		G-protein coupled receptors:GPCRs excl olfactory receptors; Transporters				(M5913)HALLMARK INTERFERON GAMMA RESPONSE; (M5932)HALLMARK INFLAMMATORY RESPONSE; (M5953)HALLMARK KRAS SIGNALING UP	0.0	0.0	0.0	0.0	0.0	0.0	0.0	1.0	0.0	0.0	0.0	0.0
DSCAM	1826	symbol	H. sapiens	1826	H. sapiens	DSCAM	DS cell adhesion molecule	GO:0060060 post-embryonic retina morphogenesis in camera-type eye;GO:0048842 positive regulation of axon extension involved in axon guidance;GO:0038007 netrin-activated signaling pathway			Golgi apparatus (Approved)		(M285)PID HNF3A PATHWAY; (M200)PID ERA GENOMIC PATHWAY		0.0	0.0	0.0	0.0	0.0	1.0	0.0	1.0	0.0	0.0	0.0	0.0
SNORD10	652966	symbol	H. sapiens	652966	H. sapiens	SNORD10	small nucleolar RNA, C/D box 10	GO:0006396 RNA processing;GO:0016070 RNA metabolic process;GO:0010467 gene expression							0.0	0.0	0.0	0.0	0.0	0.0	0.0	0.0	0.0	0.0	0.0	0.0
CACNA2D1	781	symbol	H. sapiens	781	H. sapiens	CACNA2D1	calcium voltage-gated channel auxiliary subunit alpha2delta 1	GO:0061577 calcium ion transmembrane transport via high voltage-gated calcium channel;GO:0086048 membrane depolarization during bundle of His cell action potential;GO:1901843 positive regulation of high voltage-gated calcium channel activity		Transporters:Accessory Factors Involved in Transport; FDA approved drug targets:Small molecule drugs; Predicted intracellular proteins		Pregabalin; Isradipine; Ibutilide; Nisoldipine; Nicardipine; Gabapentin; Felodipine; Nitrendipine; Cyclandelate; Nilvadipine; Gabapentin enacarbil			0.0	0.0	0.0	0.0	0.0	0.0	0.0	0.0	0.0	1.0	0.0	0.0
HIST1H4B	8366	gene_synonym	H. sapiens	8366	H. sapiens	H4C2	H4 clustered histone 2	GO:0045653 negative regulation of megakaryocyte differentiation;GO:0006335 DNA replication-dependent chromatin assembly;GO:0034723 DNA replication-dependent chromatin organization		Predicted intracellular proteins; Disease related genes					1.0	0.0	0.0	0.0	0.0	0.0	0.0	0.0	0.0	0.0	0.0	0.0
LOXL3	84695	symbol	H. sapiens	84695	H. sapiens	LOXL3	lysyl oxidase like 3	GO:1905590 fibronectin fibril organization;GO:2000329 negative regulation of T-helper 17 cell lineage commitment;GO:0018057 peptidyl-lysine oxidation		ENZYME proteins:Oxidoreductases; Predicted secreted proteins; Disease related genes; Potential drug targets; Enzymes; Predicted intracellular proteins			(M3468)NABA ECM REGULATORS; (M5885)NABA MATRISOME ASSOCIATED; (M5889)NABA MATRISOME		1.0	0.0	0.0	0.0	0.0	1.0	0.0	0.0	0.0	0.0	1.0	0.0
SNORA52	619565	symbol	H. sapiens	619565	H. sapiens	SNORA52	small nucleolar RNA, H/ACA box 52	GO:0006396 RNA processing;GO:0016070 RNA metabolic process;GO:0010467 gene expression							0.0	0.0	0.0	0.0	0.0	0.0	0.0	0.0	0.0	0.0	0.0	0.0
HIST1H2BO	8348	gene_synonym	H. sapiens	8348	H. sapiens	H2BC17	H2B clustered histone 17	GO:0006334 nucleosome assembly;GO:0031497 chromatin assembly;GO:0034728 nucleosome organization		Predicted intracellular proteins	Nucleoplasm (Approved); Additional: Cytosol				1.0	1.0	0.0	0.0	1.0	0.0	0.0	0.0	0.0	0.0	0.0	0.0
ADAMTS8	11095	symbol	H. sapiens	11095	H. sapiens	ADAMTS8	ADAM metallopeptidase with thrombospondin type 1 motif 8	GO:0035435 phosphate ion transmembrane transport;GO:0006817 phosphate ion transport;GO:0098661 inorganic anion transmembrane transport		Predicted secreted proteins; Cancer-related genes:Candidate cancer biomarkers			(M3468)NABA ECM REGULATORS; (M5885)NABA MATRISOME ASSOCIATED; (M5889)NABA MATRISOME		0.0	0.0	0.0	0.0	0.0	0.0	0.0	0.0	0.0	0.0	0.0	1.0
SNORA57	692158	symbol	H. sapiens	692158	H. sapiens	SNORA57	small nucleolar RNA, H/ACA box 57	GO:0006396 RNA processing;GO:0016070 RNA metabolic process;GO:0010467 gene expression							0.0	0.0	0.0	0.0	0.0	0.0	0.0	0.0	0.0	0.0	0.0	0.0
ACVR1C	130399	symbol	H. sapiens	130399	H. sapiens	ACVR1C	activin A receptor type 1C	GO:1901383 negative regulation of chorionic trophoblast cell proliferation;GO:0001834 trophectodermal cell proliferation;GO:1901382 regulation of chorionic trophoblast cell proliferation	TKL Ser/Thr protein kinase family	Enzymes; Predicted intracellular proteins; Kinases:TKL Ser/Thr protein kinases; ENZYME proteins:Transferases					0.0	0.0	0.0	0.0	0.0	0.0	1.0	0.0	1.0	0.0	0.0	1.0
HIST1H2BH	8345	gene_synonym	H. sapiens	8345	H. sapiens	H2BC9	H2B clustered histone 9	GO:0006334 nucleosome assembly;GO:0031497 chromatin assembly;GO:0034728 nucleosome organization		Predicted intracellular proteins	Nucleoplasm (Approved); Additional: Cytosol				1.0	1.0	0.0	0.0	1.0	0.0	0.0	0.0	0.0	0.0	0.0	0.0
SNORD17	692086	symbol	H. sapiens	692086	H. sapiens	SNORD17	small nucleolar RNA, C/D box 17	GO:0006396 RNA processing;GO:0016070 RNA metabolic process;GO:0010467 gene expression							0.0	0.0	0.0	0.0	0.0	0.0	0.0	0.0	0.0	0.0	0.0	0.0
HIST1H2AC	8334	gene_synonym	H. sapiens	8334	H. sapiens	H2AC6	H2A clustered histone 6	GO:0008285 negative regulation of cell population proliferation;GO:0042127 regulation of cell population proliferation;GO:0048523 negative regulation of cellular process		Predicted intracellular proteins; Cancer-related genes:Candidate cancer biomarkers	Nucleoplasm (Approved)				1.0	1.0	0.0	0.0	0.0	0.0	0.0	0.0	0.0	0.0	0.0	1.0
LRRTM2	26045	symbol	H. sapiens	26045	H. sapiens	LRRTM2	leucine rich repeat transmembrane neuronal 2	GO:0099151 regulation of postsynaptic density assembly;GO:0099150 regulation of postsynaptic specialization assembly;GO:1904889 regulation of excitatory synapse assembly		Predicted intracellular proteins					0.0	0.0	0.0	0.0	0.0	0.0	0.0	1.0	0.0	0.0	0.0	0.0
HIST1H2BF	3017	gene_synonym	H. sapiens	3017	H. sapiens	H2BC5	H2B clustered histone 5	GO:0006334 nucleosome assembly;GO:0031497 chromatin assembly;GO:0034728 nucleosome organization		Predicted intracellular proteins	Nucleoplasm (Approved); Additional: Cytosol				1.0	1.0	0.0	0.0	1.0	0.0	0.0	0.0	0.0	0.0	0.0	0.0
HIST1H2AL	8332	gene_synonym	H. sapiens	8332	H. sapiens	H2AC16	H2A clustered histone 16	GO:0008150 biological_process		Predicted intracellular proteins	Nucleoplasm (Approved)				1.0	1.0	0.0	0.0	0.0	0.0	0.0	0.0	0.0	0.0	0.0	0.0
IGFBP2	3485	symbol	H. sapiens	3485	H. sapiens	IGFBP2	insulin like growth factor binding protein 2	GO:0010226 response to lithium ion;GO:0043567 regulation of insulin-like growth factor receptor signaling pathway;GO:0042104 positive regulation of activated T cell proliferation		Predicted secreted proteins; Predicted intracellular proteins; Cancer-related genes:Candidate cancer biomarkers	Endoplasmic reticulum (Approved)		(M3008)NABA ECM GLYCOPROTEINS; (M5884)NABA CORE MATRISOME; (M5889)NABA MATRISOME	(M5941)HALLMARK UV RESPONSE UP; (M5930)HALLMARK EPITHELIAL MESENCHYMAL TRANSITION; (M5956)HALLMARK KRAS SIGNALING DN	0.0	0.0	0.0	0.0	0.0	1.0	0.0	0.0	0.0	0.0	0.0	0.0
RELN	5649	symbol	H. sapiens	5649	H. sapiens	RELN	reelin	GO:1902076 regulation of lateral motor column neuron migration;GO:1902078 positive regulation of lateral motor column neuron migration;GO:1905483 regulation of motor neuron migration		Predicted secreted proteins; Human disease related genes:Nervous system diseases:Epilepsy; Human disease related genes:Congenital malformations:Congenital malformations of the nervous system; Disease related genes	Golgi apparatus (Approved); Additional: Vesicles		(M69)PID REELIN PATHWAY; (M163)PID LIS1 PATHWAY; (M3008)NABA ECM GLYCOPROTEINS	(M5953)HALLMARK KRAS SIGNALING UP	0.0	0.0	0.0	0.0	0.0	1.0	0.0	1.0	0.0	0.0	1.0	0.0
SUSD5	26032	symbol	H. sapiens	26032	H. sapiens	SUSD5	sushi domain containing 5	GO:0007219 Notch signaling pathway;GO:0007155 cell adhesion;GO:0022610 biological adhesion		Predicted intracellular proteins	Golgi apparatus;Vesicles (Uncertain)				0.0	0.0	0.0	0.0	0.0	0.0	0.0	0.0	0.0	0.0	0.0	0.0
HIST1H3J	8356	gene_synonym	H. sapiens	8356	H. sapiens	H3C12	H3 clustered histone 12	GO:0006335 DNA replication-dependent chromatin assembly;GO:0034723 DNA replication-dependent chromatin organization;GO:0032200 telomere organization		Predicted intracellular proteins; Disease related genes					1.0	0.0	1.0	0.0	0.0	0.0	0.0	0.0	0.0	0.0	0.0	0.0
ZNF460	10794	symbol	H. sapiens	10794	H. sapiens	ZNF460	zinc finger protein 460	GO:0006357 regulation of transcription by RNA polymerase II;GO:0006355 regulation of transcription, DNA-templated;GO:1903506 regulation of nucleic acid-templated transcription		Predicted intracellular proteins; Transcription factors:Zinc-coordinating DNA-binding domains	Nucleoplasm (Approved)				0.0	0.0	0.0	0.0	0.0	0.0	0.0	0.0	0.0	0.0	0.0	0.0
HIST1H2BI	3017	gene_synonym	H. sapiens	3017	H. sapiens	H2BC5	H2B clustered histone 5	GO:0006334 nucleosome assembly;GO:0031497 chromatin assembly;GO:0034728 nucleosome organization		Predicted intracellular proteins	Nucleoplasm (Approved); Additional: Cytosol				1.0	1.0	0.0	0.0	1.0	0.0	0.0	0.0	0.0	0.0	0.0	0.0
GPR183	1880	symbol	H. sapiens	1880	H. sapiens	GPR183	G protein-coupled receptor 183	GO:0036145 dendritic cell homeostasis;GO:2000458 regulation of astrocyte chemotaxis;GO:0061470 T follicular helper cell differentiation		G-protein coupled receptors:GPCRs excl olfactory receptors				(M5890)HALLMARK TNFA SIGNALING VIA NFKB; (M5932)HALLMARK INFLAMMATORY RESPONSE	0.0	0.0	0.0	0.0	0.0	1.0	0.0	1.0	0.0	0.0	0.0	0.0
HIST1H2BL	8340	gene_synonym	H. sapiens	8340	H. sapiens	H2BC13	H2B clustered histone 13	GO:0006334 nucleosome assembly;GO:0031497 chromatin assembly;GO:0034728 nucleosome organization		Predicted intracellular proteins	Nucleoplasm (Approved); Additional: Cytosol				1.0	1.0	0.0	0.0	1.0	0.0	0.0	0.0	0.0	0.0	0.0	0.0
9-Sep						None	None	None	None	None	None	None	None	None	nan	nan	nan	nan	nan	nan	nan	nan	nan	nan	nan	nan
SNORA70	26778	symbol	H. sapiens	26778	H. sapiens	SNORA70	small nucleolar RNA, H/ACA box 70	GO:0006396 RNA processing;GO:0016070 RNA metabolic process;GO:0010467 gene expression							0.0	0.0	0.0	0.0	0.0	0.0	0.0	0.0	0.0	0.0	0.0	0.0
EIF6	3692	symbol	H. sapiens	3692	H. sapiens	EIF6	eukaryotic translation initiation factor 6	GO:1902626 assembly of large subunit precursor of preribosome;GO:0042256 mature ribosome assembly;GO:0000054 ribosomal subunit export from nucleus		Predicted intracellular proteins	Nucleoplasm (Supported)	Copper			1.0	0.0	0.0	0.0	0.0	0.0	0.0	0.0	0.0	0.0	0.0	0.0
TSPAN5	10098	symbol	H. sapiens	10098	H. sapiens	TSPAN5	tetraspanin 5	GO:0045747 positive regulation of Notch signaling pathway;GO:0008593 regulation of Notch signaling pathway;GO:0072659 protein localization to plasma membrane						(M5945)HALLMARK HEME METABOLISM	1.0	0.0	0.0	0.0	0.0	0.0	0.0	0.0	0.0	0.0	0.0	0.0
HIVEP1	3096	symbol	H. sapiens	3096	H. sapiens	HIVEP1	HIVEP zinc finger 1	GO:0030509 BMP signaling pathway;GO:0071772 response to BMP;GO:0071773 cellular response to BMP stimulus		Predicted intracellular proteins; Transcription factors:Zinc-coordinating DNA-binding domains	Nucleoplasm (Supported); Additional: Cytosol;Mitochondria;Nuclear bodies				0.0	0.0	0.0	0.0	0.0	0.0	0.0	0.0	1.0	0.0	0.0	0.0
HIST1H1C	3006	gene_synonym	H. sapiens	3006	H. sapiens	H1-2	H1.2 linker histone, cluster member	GO:0098532 histone H3-K27 trimethylation;GO:0070734 histone H3-K27 methylation;GO:0016584 nucleosome positioning		Predicted intracellular proteins	Nucleoli rim;Nucleoplasm (Supported)			(M5939)HALLMARK P53 PATHWAY	1.0	0.0	0.0	1.0	0.0	0.0	0.0	0.0	0.0	0.0	0.0	0.0
HIST4H4	121504	gene_synonym	H. sapiens	121504	H. sapiens	H4-16	H4 histone 16	GO:0045653 negative regulation of megakaryocyte differentiation;GO:0006335 DNA replication-dependent chromatin assembly;GO:0034723 DNA replication-dependent chromatin organization		Predicted intracellular proteins; Disease related genes	Nucleoplasm (Supported)				1.0	0.0	0.0	0.0	0.0	0.0	0.0	0.0	0.0	0.0	0.0	0.0
LIMD1	8994	symbol	H. sapiens	8994	H. sapiens	LIMD1	LIM domain containing 1	GO:0035331 negative regulation of hippo signaling;GO:0033962 P-body assembly;GO:0002076 osteoblast development		Predicted intracellular proteins	Focal adhesion sites;Nucleoplasm (Supported)				1.0	0.0	0.0	0.0	0.0	0.0	0.0	0.0	0.0	0.0	0.0	0.0
TERC	7012	symbol	H. sapiens	7012	H. sapiens	TERC	telomerase RNA component	GO:2000773 negative regulation of cellular senescence;GO:0007004 telomere maintenance via telomerase;GO:0090344 negative regulation of cell aging							1.0	0.0	0.0	0.0	0.0	0.0	0.0	0.0	0.0	0.0	0.0	0.0
SCG2	7857	symbol	H. sapiens	7857	H. sapiens	SCG2	secretogranin II	GO:0050930 induction of positive chemotaxis;GO:0048245 eosinophil chemotaxis;GO:0072677 eosinophil migration		Predicted secreted proteins	Golgi apparatus (Approved); Additional: Vesicles			(M5919)HALLMARK HEDGEHOG SIGNALING; (M5930)HALLMARK EPITHELIAL MESENCHYMAL TRANSITION	0.0	0.0	0.0	0.0	0.0	1.0	0.0	1.0	0.0	0.0	0.0	1.0
SLC9A7	84679	symbol	H. sapiens	84679	H. sapiens	SLC9A7	solute carrier family 9 member A7	GO:1905526 regulation of Golgi lumen acidification;GO:0032847 regulation of cellular pH reduction;GO:0098719 sodium ion import across plasma membrane		Transporters:Electrochemical Potential-driven transporters; Human disease related genes:Other diseases:Mental and behavioural disorders; Disease related genes; Potential drug targets	Vesicles (Supported)				0.0	0.0	0.0	0.0	0.0	0.0	0.0	0.0	0.0	1.0	0.0	0.0
CASS4	57091	symbol	H. sapiens	57091	H. sapiens	CASS4	Cas scaffold protein family member 4	GO:0090527 actin filament reorganization;GO:1900026 positive regulation of substrate adhesion-dependent cell spreading;GO:0061098 positive regulation of protein tyrosine kinase activity		Predicted intracellular proteins					0.0	0.0	0.0	0.0	0.0	1.0	0.0	1.0	1.0	0.0	0.0	0.0
HIST2H2BF	440689	gene_synonym	H. sapiens	440689	H. sapiens	H2BC18	H2B clustered histone 18	GO:0006334 nucleosome assembly;GO:0031497 chromatin assembly;GO:0034728 nucleosome organization		Predicted intracellular proteins	Nucleoplasm (Approved); Additional: Cytosol				1.0	1.0	0.0	0.0	0.0	0.0	0.0	0.0	0.0	0.0	0.0	0.0
HIST2H2BE	8349	gene_synonym	H. sapiens	8349	H. sapiens	H2BC21	H2B clustered histone 21	GO:0002227 innate immune response in mucosa;GO:0002385 mucosal immune response;GO:0002251 organ or tissue specific immune response		Predicted intracellular proteins	Nucleoplasm (Approved); Additional: Cytosol				1.0	1.0	0.0	0.0	0.0	0.0	0.0	0.0	0.0	0.0	0.0	0.0
SNORD97	692223	symbol	H. sapiens	692223	H. sapiens	SNORD97	small nucleolar RNA, C/D box 97	GO:0006396 RNA processing;GO:0016070 RNA metabolic process;GO:0010467 gene expression							0.0	0.0	0.0	0.0	0.0	0.0	0.0	0.0	0.0	0.0	0.0	0.0
RBMXL2	27288	symbol	H. sapiens	27288	H. sapiens	RBMXL2	RBMX like 2	GO:0000377 RNA splicing, via transesterification reactions with bulged adenosine as nucleophile;GO:0000398 mRNA splicing, via spliceosome;GO:0000375 RNA splicing, via transesterification reactions		Predicted intracellular proteins					0.0	0.0	0.0	0.0	0.0	0.0	0.0	0.0	0.0	0.0	0.0	0.0
SNORA24	677809	symbol	H. sapiens	677809	H. sapiens	SNORA24	small nucleolar RNA, H/ACA box 24	GO:0006396 RNA processing;GO:0016070 RNA metabolic process;GO:0010467 gene expression							0.0	0.0	0.0	0.0	0.0	0.0	0.0	0.0	0.0	0.0	0.0	0.0
FLJ16779	100192386	symbol	H. sapiens	100192386	H. sapiens	FLJ16779	uncharacterized LOC100192386								0.0	0.0	0.0	0.0	0.0	0.0	0.0	0.0	0.0	0.0	0.0	0.0
FST	10468	symbol	H. sapiens	10468	H. sapiens	FST	follistatin	GO:0043616 keratinocyte proliferation;GO:0032926 negative regulation of activin receptor signaling pathway;GO:0051798 positive regulation of hair follicle development		Predicted secreted proteins; Predicted intracellular proteins; Candidate cardiovascular disease genes; Cancer-related genes:Candidate cancer biomarkers	Vesicles (Approved)	D-Myo-Inositol-Hexasulphate	(M181)PID BMP PATHWAY; (M5883)NABA SECRETED FACTORS; (M5885)NABA MATRISOME ASSOCIATED	(M5909)HALLMARK MYOGENESIS	1.0	0.0	0.0	0.0	0.0	0.0	0.0	0.0	1.0	0.0	0.0	0.0
TNNC1	7134	symbol	H. sapiens	7134	H. sapiens	TNNC1	troponin C1, slow skeletal and cardiac type	GO:0002086 diaphragm contraction;GO:0032972 regulation of muscle filament sliding speed;GO:0003011 involuntary skeletal muscle contraction		Predicted intracellular proteins; FDA approved drug targets:Small molecule drugs; Human disease related genes:Cardiovascular diseases:Cardiac diseases; Disease related genes	Actin filaments;Mitochondria;Nucleoplasm (Approved)	Trifluoperazine; Levosimendan; Felodipine; Bepridil; Calcium; Aluminium monostearate; 5-[1-(3,4-Dimethoxy-Benzoyl)-1,2,3,4-Tetrahydro-Quinolin-6-Yl]-6-Methyl-3,6-Dihydro-[1,3,4]Thiadiazin-2-One; N-(6-Aminohexyl)-5-Chloro-1-Naphthalenesulfonamide		(M5907)HALLMARK ESTROGEN RESPONSE LATE; (M5909)HALLMARK MYOGENESIS	0.0	0.0	0.0	0.0	0.0	0.0	0.0	0.0	0.0	1.0	0.0	0.0
SCD5	79966	symbol	H. sapiens	79966	H. sapiens	SCD5	stearoyl-CoA desaturase 5	GO:1903966 monounsaturated fatty acid biosynthetic process;GO:1903964 monounsaturated fatty acid metabolic process;GO:0006636 unsaturated fatty acid biosynthetic process		Enzymes; ENZYME proteins:Oxidoreductases					0.0	0.0	0.0	0.0	0.0	0.0	0.0	0.0	0.0	0.0	0.0	0.0
RTL1	388015	symbol	H. sapiens	388015	H. sapiens	RTL1	retrotransposon Gag like 1				Cytosol (Approved)				0.0	0.0	0.0	0.0	0.0	0.0	0.0	0.0	0.0	0.0	0.0	0.0
BLID	414899	symbol	H. sapiens	414899	H. sapiens	BLID	BH3-like motif containing, cell death inducer	GO:0043280 positive regulation of cysteine-type endopeptidase activity involved in apoptotic process;GO:2001056 positive regulation of cysteine-type endopeptidase activity;GO:0010950 positive regulation of endopeptidase activity		Predicted intracellular proteins					0.0	0.0	0.0	0.0	0.0	0.0	1.0	0.0	0.0	0.0	0.0	0.0
KCNAB1	7881	symbol	H. sapiens	7881	H. sapiens	KCNAB1	potassium voltage-gated channel subfamily A regulatory beta subunit 1	GO:1902260 negative regulation of delayed rectifier potassium channel activity;GO:1903817 negative regulation of voltage-gated potassium channel activity;GO:1902259 regulation of delayed rectifier potassium channel activity		Transporters:Accessory Factors Involved in Transport; Predicted intracellular proteins	Vesicles (Approved); Additional: Nucleoplasm;Plasma membrane				0.0	0.0	0.0	0.0	0.0	0.0	0.0	0.0	0.0	0.0	0.0	0.0
ZFHX3	463	symbol	H. sapiens	463	H. sapiens	ZFHX3	zinc finger homeobox 3	GO:1904059 regulation of locomotor rhythm;GO:0050795 regulation of behavior;GO:0032922 circadian regulation of gene expression		Transcription factors:Helix-turn-helix domains; Predicted intracellular proteins; Cancer-related genes:Mutational cancer driver genes; Cancer-related genes:Mutated cancer genes	Nucleoplasm (Supported)		(M195)PID CMYB PATHWAY		0.0	0.0	0.0	0.0	0.0	1.0	0.0	0.0	1.0	0.0	0.0	0.0
SNTB1	6641	symbol	H. sapiens	6641	H. sapiens	SNTB1	syntrophin beta 1	GO:0006936 muscle contraction;GO:0003012 muscle system process;GO:0003008 system process		Predicted intracellular proteins				(M5930)HALLMARK EPITHELIAL MESENCHYMAL TRANSITION	0.0	0.0	0.0	0.0	0.0	0.0	0.0	0.0	0.0	0.0	0.0	0.0
HIST1H4I	8294	gene_synonym	H. sapiens	8294	H. sapiens	H4C9	H4 clustered histone 9	GO:0045653 negative regulation of megakaryocyte differentiation;GO:0006335 DNA replication-dependent chromatin assembly;GO:0034723 DNA replication-dependent chromatin organization		Predicted intracellular proteins; Cancer-related genes; Disease related genes			(M32)PID HDAC CLASSIII PATHWAY		1.0	0.0	0.0	0.0	0.0	0.0	0.0	0.0	0.0	0.0	0.0	0.0
SCARNA7	677767	symbol	H. sapiens	677767	H. sapiens	SCARNA7	small Cajal body-specific RNA 7	GO:0006396 RNA processing;GO:0016070 RNA metabolic process;GO:0010467 gene expression							0.0	0.0	0.0	0.0	0.0	0.0	0.0	0.0	0.0	0.0	0.0	0.0
HIST1H2AB	8335	gene_synonym	H. sapiens	8335	H. sapiens	H2AC4	H2A clustered histone 4	GO:0008285 negative regulation of cell population proliferation;GO:0042127 regulation of cell population proliferation;GO:0048523 negative regulation of cellular process		Predicted intracellular proteins	Nucleoplasm (Approved)				1.0	1.0	0.0	0.0	0.0	0.0	0.0	0.0	0.0	0.0	0.0	1.0
HACD1	9200	symbol	H. sapiens	9200	H. sapiens	HACD1	3-hydroxyacyl-CoA dehydratase 1	GO:0030497 fatty acid elongation;GO:0042761 very long-chain fatty acid biosynthetic process;GO:0035338 long-chain fatty-acyl-CoA biosynthetic process		ENZYME proteins:Lyases; Disease related genes; Potential drug targets; Enzymes; Predicted intracellular proteins					1.0	0.0	0.0	0.0	0.0	0.0	0.0	0.0	0.0	0.0	0.0	0.0
ECE2	9718	symbol	H. sapiens	9718	H. sapiens	ECE2	endothelin converting enzyme 2	GO:0016486 peptide hormone processing;GO:0140448 signaling receptor ligand precursor processing;GO:0016485 protein processing		Enzymes; ENZYME proteins:Hydrolases; Peptidases:Metallopeptidases					0.0	0.0	0.0	0.0	0.0	0.0	0.0	0.0	0.0	0.0	0.0	0.0
KIAA1217	56243	symbol	H. sapiens	56243	H. sapiens	KIAA1217	KIAA1217	GO:0048706 embryonic skeletal system development;GO:0001501 skeletal system development;GO:0043009 chordate embryonic development		Predicted intracellular proteins	Cytosol;Nucleoplasm (Approved)				0.0	0.0	0.0	0.0	0.0	0.0	0.0	0.0	0.0	0.0	0.0	0.0
HIST1H3A	8350	gene_synonym	H. sapiens	8350	H. sapiens	H3C1	H3 clustered histone 1	GO:0006335 DNA replication-dependent chromatin assembly;GO:0034723 DNA replication-dependent chromatin organization;GO:0032200 telomere organization		Predicted intracellular proteins; Disease related genes					1.0	0.0	1.0	0.0	0.0	0.0	0.0	0.0	0.0	0.0	0.0	0.0
SNORA71A	26777	symbol	H. sapiens	26777	H. sapiens	SNORA71A	small nucleolar RNA, H/ACA box 71A	GO:0006396 RNA processing;GO:0016070 RNA metabolic process;GO:0010467 gene expression							0.0	0.0	0.0	0.0	0.0	0.0	0.0	0.0	0.0	0.0	0.0	0.0

## Sheet: Enrichment
GroupID	Category	Term	Description	LogP	Log(q-value)	InTerm_InList	Genes	Symbols
1_Summary	Reactome Gene Sets	R-HSA-3214815	HDACs deacetylate histones	-65.2583	-60.9127	36/94	3012,3013,3017,8294,8329,8330,8332,8334,8335,8336,8338,8340,8345,8348,8349,8350,8351,8352,8353,8355,8356,8357,8358,8360,8361,8362,8364,8365,8366,8367,8968,8969,8970,85235,121504,440689,3006,3007,3008,3009,3024,4217,10098,255324,7474,8994,7012,3692,920,10125,84695,10468,6023,9200	H2AC8,H2AC7,H2BC5,H4C9,H2AC13,H2AC15,H2AC16,H2AC6,H2AC4,H2AC17,H2AC20,H2BC13,H2BC9,H2BC17,H2BC21,H3C1,H3C4,H3C3,H3C6,H3C8,H3C12,H3C10,H3C2,H4C4,H4C6,H4C12,H4C3,H4C8,H4C2,H4C5,H3C7,H2AC11,H2BC11,H2AC12,H4-16,H2BC18,H1-2,H1-3,H1-4,H1-5,H1-1,MAP3K5,TSPAN5,EPGN,WNT5A,LIMD1,TERC,EIF6,CD4,RASGRP1,LOXL3,FST,RMRP,HACD1
1_Member	Reactome Gene Sets	R-HSA-3214815	HDACs deacetylate histones	-65.2583	-60.9127	36/94	3012,3013,3017,8294,8329,8330,8332,8334,8335,8336,8338,8340,8345,8348,8349,8350,8351,8352,8353,8355,8356,8357,8358,8360,8361,8362,8364,8365,8366,8367,8968,8969,8970,85235,121504,440689	H2AC8,H2AC7,H2BC5,H4C9,H2AC13,H2AC15,H2AC16,H2AC6,H2AC4,H2AC17,H2AC20,H2BC13,H2BC9,H2BC17,H2BC21,H3C1,H3C4,H3C3,H3C6,H3C8,H3C12,H3C10,H3C2,H4C4,H4C6,H4C12,H4C3,H4C8,H4C2,H4C5,H3C7,H2AC11,H2BC11,H2AC12,H4-16,H2BC18
1_Member	Reactome Gene Sets	R-HSA-9610379	HCMV Late Events	-61.2693	-57.2247	36/116	3012,3013,3017,8294,8329,8330,8332,8334,8335,8336,8338,8340,8345,8348,8349,8350,8351,8352,8353,8355,8356,8357,8358,8360,8361,8362,8364,8365,8366,8367,8968,8969,8970,85235,121504,440689	H2AC8,H2AC7,H2BC5,H4C9,H2AC13,H2AC15,H2AC16,H2AC6,H2AC4,H2AC17,H2AC20,H2BC13,H2BC9,H2BC17,H2BC21,H3C1,H3C4,H3C3,H3C6,H3C8,H3C12,H3C10,H3C2,H4C4,H4C6,H4C12,H4C3,H4C8,H4C2,H4C5,H3C7,H2AC11,H2BC11,H2AC12,H4-16,H2BC18
1_Member	Reactome Gene Sets	R-HSA-9609690	HCMV Early Events	-58.504	-54.6355	36/135	3012,3013,3017,8294,8329,8330,8332,8334,8335,8336,8338,8340,8345,8348,8349,8350,8351,8352,8353,8355,8356,8357,8358,8360,8361,8362,8364,8365,8366,8367,8968,8969,8970,85235,121504,440689	H2AC8,H2AC7,H2BC5,H4C9,H2AC13,H2AC15,H2AC16,H2AC6,H2AC4,H2AC17,H2AC20,H2BC13,H2BC9,H2BC17,H2BC21,H3C1,H3C4,H3C3,H3C6,H3C8,H3C12,H3C10,H3C2,H4C4,H4C6,H4C12,H4C3,H4C8,H4C2,H4C5,H3C7,H2AC11,H2BC11,H2AC12,H4-16,H2BC18
1_Member	KEGG Pathway	hsa05322	Systemic lupus erythematosus	-58.3715	-54.6279	36/136	3012,3013,3017,8294,8329,8330,8332,8334,8335,8336,8338,8340,8345,8348,8349,8350,8351,8352,8353,8355,8356,8357,8358,8360,8361,8362,8364,8365,8366,8367,8968,8969,8970,85235,121504,440689	H2AC8,H2AC7,H2BC5,H4C9,H2AC13,H2AC15,H2AC16,H2AC6,H2AC4,H2AC17,H2AC20,H2BC13,H2BC9,H2BC17,H2BC21,H3C1,H3C4,H3C3,H3C6,H3C8,H3C12,H3C10,H3C2,H4C4,H4C6,H4C12,H4C3,H4C8,H4C2,H4C5,H3C7,H2AC11,H2BC11,H2AC12,H4-16,H2BC18
1_Member	Reactome Gene Sets	R-HSA-3214847	HATs acetylate histones	-57.5994	-53.9527	36/142	3012,3013,3017,8294,8329,8330,8332,8334,8335,8336,8338,8340,8345,8348,8349,8350,8351,8352,8353,8355,8356,8357,8358,8360,8361,8362,8364,8365,8366,8367,8968,8969,8970,85235,121504,440689	H2AC8,H2AC7,H2BC5,H4C9,H2AC13,H2AC15,H2AC16,H2AC6,H2AC4,H2AC17,H2AC20,H2BC13,H2BC9,H2BC17,H2BC21,H3C1,H3C4,H3C3,H3C6,H3C8,H3C12,H3C10,H3C2,H4C4,H4C6,H4C12,H4C3,H4C8,H4C2,H4C5,H3C7,H2AC11,H2BC11,H2AC12,H4-16,H2BC18
1_Member	Reactome Gene Sets	R-HSA-9609646	HCMV Infection	-55.4929	-51.9254	36/160	3012,3013,3017,8294,8329,8330,8332,8334,8335,8336,8338,8340,8345,8348,8349,8350,8351,8352,8353,8355,8356,8357,8358,8360,8361,8362,8364,8365,8366,8367,8968,8969,8970,85235,121504,440689	H2AC8,H2AC7,H2BC5,H4C9,H2AC13,H2AC15,H2AC16,H2AC6,H2AC4,H2AC17,H2AC20,H2BC13,H2BC9,H2BC17,H2BC21,H3C1,H3C4,H3C3,H3C6,H3C8,H3C12,H3C10,H3C2,H4C4,H4C6,H4C12,H4C3,H4C8,H4C2,H4C5,H3C7,H2AC11,H2BC11,H2AC12,H4-16,H2BC18
1_Member	Reactome Gene Sets	R-HSA-73728	RNA Polymerase I Promoter Opening	-55.1775	-51.677	29/63	3012,3013,3017,8294,8334,8335,8338,8340,8345,8348,8349,8350,8351,8352,8353,8355,8356,8357,8358,8360,8361,8362,8364,8365,8366,8367,8968,8970,121504	H2AC8,H2AC7,H2BC5,H4C9,H2AC6,H2AC4,H2AC20,H2BC13,H2BC9,H2BC17,H2BC21,H3C1,H3C4,H3C3,H3C6,H3C8,H3C12,H3C10,H3C2,H4C4,H4C6,H4C12,H4C3,H4C8,H4C2,H4C5,H3C7,H2BC11,H4-16
1_Member	Reactome Gene Sets	R-HSA-5334118	DNA methylation	-54.6609	-51.2184	29/65	3012,3013,3017,8294,8334,8335,8338,8340,8345,8348,8349,8350,8351,8352,8353,8355,8356,8357,8358,8360,8361,8362,8364,8365,8366,8367,8968,8970,121504	H2AC8,H2AC7,H2BC5,H4C9,H2AC6,H2AC4,H2AC20,H2BC13,H2BC9,H2BC17,H2BC21,H3C1,H3C4,H3C3,H3C6,H3C8,H3C12,H3C10,H3C2,H4C4,H4C6,H4C12,H4C3,H4C8,H4C2,H4C5,H3C7,H2BC11,H4-16
1_Member	Reactome Gene Sets	R-HSA-5625886	Activated PKN1 stimulates transcription of AR (androgen receptor) regulated genes KLK2 and KLK3	-54.1655	-50.7741	29/67	3012,3013,3017,8294,8334,8335,8338,8340,8345,8348,8349,8350,8351,8352,8353,8355,8356,8357,8358,8360,8361,8362,8364,8365,8366,8367,8968,8970,121504	H2AC8,H2AC7,H2BC5,H4C9,H2AC6,H2AC4,H2AC20,H2BC13,H2BC9,H2BC17,H2BC21,H3C1,H3C4,H3C3,H3C6,H3C8,H3C12,H3C10,H3C2,H4C4,H4C6,H4C12,H4C3,H4C8,H4C2,H4C5,H3C7,H2BC11,H4-16
1_Member	Reactome Gene Sets	R-HSA-427359	SIRT1 negatively regulates rRNA expression	-53.9251	-50.5795	29/68	3012,3013,3017,8294,8334,8335,8338,8340,8345,8348,8349,8350,8351,8352,8353,8355,8356,8357,8358,8360,8361,8362,8364,8365,8366,8367,8968,8970,121504	H2AC8,H2AC7,H2BC5,H4C9,H2AC6,H2AC4,H2AC20,H2BC13,H2BC9,H2BC17,H2BC21,H3C1,H3C4,H3C3,H3C6,H3C8,H3C12,H3C10,H3C2,H4C4,H4C6,H4C12,H4C3,H4C8,H4C2,H4C5,H3C7,H2BC11,H4-16
1_Member	Reactome Gene Sets	R-HSA-68616	Assembly of the ORC complex at the origin of replication	-53.6894	-50.3851	29/69	3012,3013,3017,8294,8334,8335,8338,8340,8345,8348,8349,8350,8351,8352,8353,8355,8356,8357,8358,8360,8361,8362,8364,8365,8366,8367,8968,8970,121504	H2AC8,H2AC7,H2BC5,H4C9,H2AC6,H2AC4,H2AC20,H2BC13,H2BC9,H2BC17,H2BC21,H3C1,H3C4,H3C3,H3C6,H3C8,H3C12,H3C10,H3C2,H4C4,H4C6,H4C12,H4C3,H4C8,H4C2,H4C5,H3C7,H2BC11,H4-16
1_Member	KEGG Pathway	hsa05034	Alcoholism	-52.7944	-49.5901	36/187	3012,3013,3017,8294,8329,8330,8332,8334,8335,8336,8338,8340,8345,8348,8349,8350,8351,8352,8353,8355,8356,8357,8358,8360,8361,8362,8364,8365,8366,8367,8968,8969,8970,85235,121504,440689	H2AC8,H2AC7,H2BC5,H4C9,H2AC13,H2AC15,H2AC16,H2AC6,H2AC4,H2AC17,H2AC20,H2BC13,H2BC9,H2BC17,H2BC21,H3C1,H3C4,H3C3,H3C6,H3C8,H3C12,H3C10,H3C2,H4C4,H4C6,H4C12,H4C3,H4C8,H4C2,H4C5,H3C7,H2AC11,H2BC11,H2AC12,H4-16,H2BC18
1_Member	Reactome Gene Sets	R-HSA-212300	PRC2 methylates histones and DNA	-52.7896	-49.5901	29/73	3012,3013,3017,8294,8334,8335,8338,8340,8345,8348,8349,8350,8351,8352,8353,8355,8356,8357,8358,8360,8361,8362,8364,8365,8366,8367,8968,8970,121504	H2AC8,H2AC7,H2BC5,H4C9,H2AC6,H2AC4,H2AC20,H2BC13,H2BC9,H2BC17,H2BC21,H3C1,H3C4,H3C3,H3C6,H3C8,H3C12,H3C10,H3C2,H4C4,H4C6,H4C12,H4C3,H4C8,H4C2,H4C5,H3C7,H2BC11,H4-16
1_Member	Reactome Gene Sets	R-HSA-9710421	Defective pyroptosis	-52.7896	-49.5901	29/73	3012,3013,3017,8294,8334,8335,8338,8340,8345,8348,8349,8350,8351,8352,8353,8355,8356,8357,8358,8360,8361,8362,8364,8365,8366,8367,8968,8970,121504	H2AC8,H2AC7,H2BC5,H4C9,H2AC6,H2AC4,H2AC20,H2BC13,H2BC9,H2BC17,H2BC21,H3C1,H3C4,H3C3,H3C6,H3C8,H3C12,H3C10,H3C2,H4C4,H4C6,H4C12,H4C3,H4C8,H4C2,H4C5,H3C7,H2BC11,H4-16
1_Member	Reactome Gene Sets	R-HSA-2299718	Condensation of Prophase Chromosomes	-52.5747	-49.4051	29/74	3012,3013,3017,8294,8334,8335,8338,8340,8345,8348,8349,8350,8351,8352,8353,8355,8356,8357,8358,8360,8361,8362,8364,8365,8366,8367,8968,8970,121504	H2AC8,H2AC7,H2BC5,H4C9,H2AC6,H2AC4,H2AC20,H2BC13,H2BC9,H2BC17,H2BC21,H3C1,H3C4,H3C3,H3C6,H3C8,H3C12,H3C10,H3C2,H4C4,H4C6,H4C12,H4C3,H4C8,H4C2,H4C5,H3C7,H2BC11,H4-16
1_Member	KEGG Pathway	hsa04613	Neutrophil extracellular trap formation	-52.5221	-49.3805	36/190	3012,3013,3017,8294,8329,8330,8332,8334,8335,8336,8338,8340,8345,8348,8349,8350,8351,8352,8353,8355,8356,8357,8358,8360,8361,8362,8364,8365,8366,8367,8968,8969,8970,85235,121504,440689	H2AC8,H2AC7,H2BC5,H4C9,H2AC13,H2AC15,H2AC16,H2AC6,H2AC4,H2AC17,H2AC20,H2BC13,H2BC9,H2BC17,H2BC21,H3C1,H3C4,H3C3,H3C6,H3C8,H3C12,H3C10,H3C2,H4C4,H4C6,H4C12,H4C3,H4C8,H4C2,H4C5,H3C7,H2AC11,H2BC11,H2AC12,H4-16,H2BC18
1_Member	Reactome Gene Sets	R-HSA-427389	ERCC6 (CSB) and EHMT2 (G9a) positively regulate rRNA expression	-52.1558	-49.0406	29/76	3012,3013,3017,8294,8334,8335,8338,8340,8345,8348,8349,8350,8351,8352,8353,8355,8356,8357,8358,8360,8361,8362,8364,8365,8366,8367,8968,8970,121504	H2AC8,H2AC7,H2BC5,H4C9,H2AC6,H2AC4,H2AC20,H2BC13,H2BC9,H2BC17,H2BC21,H3C1,H3C4,H3C3,H3C6,H3C8,H3C12,H3C10,H3C2,H4C4,H4C6,H4C12,H4C3,H4C8,H4C2,H4C5,H3C7,H2BC11,H4-16
1_Member	Reactome Gene Sets	R-HSA-3214858	RMTs methylate histone arginines	-51.5532	-48.4629	29/79	3012,3013,8294,8329,8330,8332,8334,8335,8336,8338,8350,8351,8352,8353,8355,8356,8357,8358,8360,8361,8362,8364,8365,8366,8367,8968,8969,85235,121504	H2AC8,H2AC7,H4C9,H2AC13,H2AC15,H2AC16,H2AC6,H2AC4,H2AC17,H2AC20,H3C1,H3C4,H3C3,H3C6,H3C8,H3C12,H3C10,H3C2,H4C4,H4C6,H4C12,H4C3,H4C8,H4C2,H4C5,H3C7,H2AC11,H2AC12,H4-16
1_Member	Reactome Gene Sets	R-HSA-912446	Meiotic recombination	-50.2527	-47.1859	29/86	3012,3013,3017,8294,8334,8335,8338,8340,8345,8348,8349,8350,8351,8352,8353,8355,8356,8357,8358,8360,8361,8362,8364,8365,8366,8367,8968,8970,121504	H2AC8,H2AC7,H2BC5,H4C9,H2AC6,H2AC4,H2AC20,H2BC13,H2BC9,H2BC17,H2BC21,H3C1,H3C4,H3C3,H3C6,H3C8,H3C12,H3C10,H3C2,H4C4,H4C6,H4C12,H4C3,H4C8,H4C2,H4C5,H3C7,H2BC11,H4-16
1_Member	Reactome Gene Sets	R-HSA-2559583	Cellular Senescence	-49.9328	-46.8882	35/197	3006,3007,3008,3009,3012,3013,3017,3024,4217,8294,8334,8335,8338,8340,8345,8348,8349,8350,8351,8352,8353,8355,8356,8357,8358,8360,8361,8362,8364,8365,8366,8367,8968,8970,121504	H1-2,H1-3,H1-4,H1-5,H2AC8,H2AC7,H2BC5,H1-1,MAP3K5,H4C9,H2AC6,H2AC4,H2AC20,H2BC13,H2BC9,H2BC17,H2BC21,H3C1,H3C4,H3C3,H3C6,H3C8,H3C12,H3C10,H3C2,H4C4,H4C6,H4C12,H4C3,H4C8,H4C2,H4C5,H3C7,H2BC11,H4-16
1_Member	Reactome Gene Sets	R-HSA-9616222	Transcriptional regulation of granulopoiesis	-49.5672	-46.5437	29/90	3012,3013,3017,8294,8334,8335,8338,8340,8345,8348,8349,8350,8351,8352,8353,8355,8356,8357,8358,8360,8361,8362,8364,8365,8366,8367,8968,8970,121504	H2AC8,H2AC7,H2BC5,H4C9,H2AC6,H2AC4,H2AC20,H2BC13,H2BC9,H2BC17,H2BC21,H3C1,H3C4,H3C3,H3C6,H3C8,H3C12,H3C10,H3C2,H4C4,H4C6,H4C12,H4C3,H4C8,H4C2,H4C5,H3C7,H2BC11,H4-16
1_Member	Reactome Gene Sets	R-HSA-201722	Formation of the beta-catenin:TCF transactivating complex	-49.4016	-46.4362	29/91	3012,3013,3017,8294,8334,8335,8338,8340,8345,8348,8349,8350,8351,8352,8353,8355,8356,8357,8358,8360,8361,8362,8364,8365,8366,8367,8968,8970,121504	H2AC8,H2AC7,H2BC5,H4C9,H2AC6,H2AC4,H2AC20,H2BC13,H2BC9,H2BC17,H2BC21,H3C1,H3C4,H3C3,H3C6,H3C8,H3C12,H3C10,H3C2,H4C4,H4C6,H4C12,H4C3,H4C8,H4C2,H4C5,H3C7,H2BC11,H4-16
1_Member	Reactome Gene Sets	R-HSA-5250924	B-WICH complex positively regulates rRNA expression	-49.4016	-46.4362	29/91	3012,3013,3017,8294,8334,8335,8338,8340,8345,8348,8349,8350,8351,8352,8353,8355,8356,8357,8358,8360,8361,8362,8364,8365,8366,8367,8968,8970,121504	H2AC8,H2AC7,H2BC5,H4C9,H2AC6,H2AC4,H2AC20,H2BC13,H2BC9,H2BC17,H2BC21,H3C1,H3C4,H3C3,H3C6,H3C8,H3C12,H3C10,H3C2,H4C4,H4C6,H4C12,H4C3,H4C8,H4C2,H4C5,H3C7,H2BC11,H4-16
1_Member	Reactome Gene Sets	R-HSA-73772	RNA Polymerase I Promoter Escape	-49.4016	-46.4362	29/91	3012,3013,3017,8294,8334,8335,8338,8340,8345,8348,8349,8350,8351,8352,8353,8355,8356,8357,8358,8360,8361,8362,8364,8365,8366,8367,8968,8970,121504	H2AC8,H2AC7,H2BC5,H4C9,H2AC6,H2AC4,H2AC20,H2BC13,H2BC9,H2BC17,H2BC21,H3C1,H3C4,H3C3,H3C6,H3C8,H3C12,H3C10,H3C2,H4C4,H4C6,H4C12,H4C3,H4C8,H4C2,H4C5,H3C7,H2BC11,H4-16
1_Member	Reactome Gene Sets	R-HSA-1912408	Pre-NOTCH Transcription and Translation	-49.077	-46.1293	29/93	3012,3013,3017,8294,8334,8335,8338,8340,8345,8348,8349,8350,8351,8352,8353,8355,8356,8357,8358,8360,8361,8362,8364,8365,8366,8367,8968,8970,121504	H2AC8,H2AC7,H2BC5,H4C9,H2AC6,H2AC4,H2AC20,H2BC13,H2BC9,H2BC17,H2BC21,H3C1,H3C4,H3C3,H3C6,H3C8,H3C12,H3C10,H3C2,H4C4,H4C6,H4C12,H4C3,H4C8,H4C2,H4C5,H3C7,H2BC11,H4-16
1_Member	Reactome Gene Sets	R-HSA-5625740	RHO GTPases activate PKNs	-48.7607	-45.8301	29/95	3012,3013,3017,8294,8334,8335,8338,8340,8345,8348,8349,8350,8351,8352,8353,8355,8356,8357,8358,8360,8361,8362,8364,8365,8366,8367,8968,8970,121504	H2AC8,H2AC7,H2BC5,H4C9,H2AC6,H2AC4,H2AC20,H2BC13,H2BC9,H2BC17,H2BC21,H3C1,H3C4,H3C3,H3C6,H3C8,H3C12,H3C10,H3C2,H4C4,H4C6,H4C12,H4C3,H4C8,H4C2,H4C5,H3C7,H2BC11,H4-16
1_Member	Reactome Gene Sets	R-HSA-977225	Amyloid fiber formation	-48.6414	-45.7271	30/111	3012,3013,3017,8294,8334,8335,8338,8340,8345,8348,8349,8350,8351,8352,8353,8355,8356,8357,8358,8360,8361,8362,8364,8365,8366,8367,8968,8970,10098,121504	H2AC8,H2AC7,H2BC5,H4C9,H2AC6,H2AC4,H2AC20,H2BC13,H2BC9,H2BC17,H2BC21,H3C1,H3C4,H3C3,H3C6,H3C8,H3C12,H3C10,H3C2,H4C4,H4C6,H4C12,H4C3,H4C8,H4C2,H4C5,H3C7,H2BC11,TSPAN5,H4-16
1_Member	Reactome Gene Sets	R-HSA-8936459	RUNX1 regulates genes involved in megakaryocyte differentiation and platelet function	-48.4524	-45.554	29/97	3012,3013,3017,8294,8334,8335,8338,8340,8345,8348,8349,8350,8351,8352,8353,8355,8356,8357,8358,8360,8361,8362,8364,8365,8366,8367,8968,8970,121504	H2AC8,H2AC7,H2BC5,H4C9,H2AC6,H2AC4,H2AC20,H2BC13,H2BC9,H2BC17,H2BC21,H3C1,H3C4,H3C3,H3C6,H3C8,H3C12,H3C10,H3C2,H4C4,H4C6,H4C12,H4C3,H4C8,H4C2,H4C5,H3C7,H2BC11,H4-16
1_Member	Reactome Gene Sets	R-HSA-9645723	Diseases of programmed cell death	-47.5713	-44.6881	29/103	3012,3013,3017,8294,8334,8335,8338,8340,8345,8348,8349,8350,8351,8352,8353,8355,8356,8357,8358,8360,8361,8362,8364,8365,8366,8367,8968,8970,121504	H2AC8,H2AC7,H2BC5,H4C9,H2AC6,H2AC4,H2AC20,H2BC13,H2BC9,H2BC17,H2BC21,H3C1,H3C4,H3C3,H3C6,H3C8,H3C12,H3C10,H3C2,H4C4,H4C6,H4C12,H4C3,H4C8,H4C2,H4C5,H3C7,H2BC11,H4-16
1_Member	Reactome Gene Sets	R-HSA-5250913	Positive epigenetic regulation of rRNA expression	-47.1534	-44.2991	29/106	3012,3013,3017,8294,8334,8335,8338,8340,8345,8348,8349,8350,8351,8352,8353,8355,8356,8357,8358,8360,8361,8362,8364,8365,8366,8367,8968,8970,121504	H2AC8,H2AC7,H2BC5,H4C9,H2AC6,H2AC4,H2AC20,H2BC13,H2BC9,H2BC17,H2BC21,H3C1,H3C4,H3C3,H3C6,H3C8,H3C12,H3C10,H3C2,H4C4,H4C6,H4C12,H4C3,H4C8,H4C2,H4C5,H3C7,H2BC11,H4-16
1_Member	Reactome Gene Sets	R-HSA-5578749	Transcriptional regulation by small RNAs	-47.1534	-44.2991	29/106	3012,3013,3017,8294,8334,8335,8338,8340,8345,8348,8349,8350,8351,8352,8353,8355,8356,8357,8358,8360,8361,8362,8364,8365,8366,8367,8968,8970,121504	H2AC8,H2AC7,H2BC5,H4C9,H2AC6,H2AC4,H2AC20,H2BC13,H2BC9,H2BC17,H2BC21,H3C1,H3C4,H3C3,H3C6,H3C8,H3C12,H3C10,H3C2,H4C4,H4C6,H4C12,H4C3,H4C8,H4C2,H4C5,H3C7,H2BC11,H4-16
1_Member	Reactome Gene Sets	R-HSA-427413	NoRC negatively regulates rRNA expression	-47.0172	-44.1767	29/107	3012,3013,3017,8294,8334,8335,8338,8340,8345,8348,8349,8350,8351,8352,8353,8355,8356,8357,8358,8360,8361,8362,8364,8365,8366,8367,8968,8970,121504	H2AC8,H2AC7,H2BC5,H4C9,H2AC6,H2AC4,H2AC20,H2BC13,H2BC9,H2BC17,H2BC21,H3C1,H3C4,H3C3,H3C6,H3C8,H3C12,H3C10,H3C2,H4C4,H4C6,H4C12,H4C3,H4C8,H4C2,H4C5,H3C7,H2BC11,H4-16
1_Member	GO Biological Processes	GO:0006334	nucleosome assembly	-46.8786	-44.0645	30/125	3006,3007,3008,3009,3017,3024,8294,8340,8345,8348,8349,8350,8351,8352,8353,8355,8356,8357,8358,8360,8361,8362,8364,8365,8366,8367,8968,8970,121504,440689	H1-2,H1-3,H1-4,H1-5,H2BC5,H1-1,H4C9,H2BC13,H2BC9,H2BC17,H2BC21,H3C1,H3C4,H3C3,H3C6,H3C8,H3C12,H3C10,H3C2,H4C4,H4C6,H4C12,H4C3,H4C8,H4C2,H4C5,H3C7,H2BC11,H4-16,H2BC18
1_Member	Reactome Gene Sets	R-HSA-2559580	Oxidative Stress Induced Senescence	-46.8786	-44.0645	30/125	3012,3013,3017,4217,8294,8334,8335,8338,8340,8345,8348,8349,8350,8351,8352,8353,8355,8356,8357,8358,8360,8361,8362,8364,8365,8366,8367,8968,8970,121504	H2AC8,H2AC7,H2BC5,MAP3K5,H4C9,H2AC6,H2AC4,H2AC20,H2BC13,H2BC9,H2BC17,H2BC21,H3C1,H3C4,H3C3,H3C6,H3C8,H3C12,H3C10,H3C2,H4C4,H4C6,H4C12,H4C3,H4C8,H4C2,H4C5,H3C7,H2BC11,H4-16
1_Member	Reactome Gene Sets	R-HSA-1912422	Pre-NOTCH Expression and Processing	-46.7492	-43.9476	29/109	3012,3013,3017,8294,8334,8335,8338,8340,8345,8348,8349,8350,8351,8352,8353,8355,8356,8357,8358,8360,8361,8362,8364,8365,8366,8367,8968,8970,121504	H2AC8,H2AC7,H2BC5,H4C9,H2AC6,H2AC4,H2AC20,H2BC13,H2BC9,H2BC17,H2BC21,H3C1,H3C4,H3C3,H3C6,H3C8,H3C12,H3C10,H3C2,H4C4,H4C6,H4C12,H4C3,H4C8,H4C2,H4C5,H3C7,H2BC11,H4-16
1_Member	Reactome Gene Sets	R-HSA-5250941	Negative epigenetic regulation of rRNA expression	-46.6174	-43.8399	29/110	3012,3013,3017,8294,8334,8335,8338,8340,8345,8348,8349,8350,8351,8352,8353,8355,8356,8357,8358,8360,8361,8362,8364,8365,8366,8367,8968,8970,121504	H2AC8,H2AC7,H2BC5,H4C9,H2AC6,H2AC4,H2AC20,H2BC13,H2BC9,H2BC17,H2BC21,H3C1,H3C4,H3C3,H3C6,H3C8,H3C12,H3C10,H3C2,H4C4,H4C6,H4C12,H4C3,H4C8,H4C2,H4C5,H3C7,H2BC11,H4-16
1_Member	Reactome Gene Sets	R-HSA-73854	RNA Polymerase I Promoter Clearance	-46.6174	-43.8399	29/110	3012,3013,3017,8294,8334,8335,8338,8340,8345,8348,8349,8350,8351,8352,8353,8355,8356,8357,8358,8360,8361,8362,8364,8365,8366,8367,8968,8970,121504	H2AC8,H2AC7,H2BC5,H4C9,H2AC6,H2AC4,H2AC20,H2BC13,H2BC9,H2BC17,H2BC21,H3C1,H3C4,H3C3,H3C6,H3C8,H3C12,H3C10,H3C2,H4C4,H4C6,H4C12,H4C3,H4C8,H4C2,H4C5,H3C7,H2BC11,H4-16
1_Member	Reactome Gene Sets	R-HSA-3247509	Chromatin modifying enzymes	-46.3866	-43.6321	36/274	3012,3013,3017,8294,8329,8330,8332,8334,8335,8336,8338,8340,8345,8348,8349,8350,8351,8352,8353,8355,8356,8357,8358,8360,8361,8362,8364,8365,8366,8367,8968,8969,8970,85235,121504,440689	H2AC8,H2AC7,H2BC5,H4C9,H2AC13,H2AC15,H2AC16,H2AC6,H2AC4,H2AC17,H2AC20,H2BC13,H2BC9,H2BC17,H2BC21,H3C1,H3C4,H3C3,H3C6,H3C8,H3C12,H3C10,H3C2,H4C4,H4C6,H4C12,H4C3,H4C8,H4C2,H4C5,H3C7,H2AC11,H2BC11,H2AC12,H4-16,H2BC18
1_Member	Reactome Gene Sets	R-HSA-4839726	Chromatin organization	-46.3866	-43.6321	36/274	3012,3013,3017,8294,8329,8330,8332,8334,8335,8336,8338,8340,8345,8348,8349,8350,8351,8352,8353,8355,8356,8357,8358,8360,8361,8362,8364,8365,8366,8367,8968,8969,8970,85235,121504,440689	H2AC8,H2AC7,H2BC5,H4C9,H2AC13,H2AC15,H2AC16,H2AC6,H2AC4,H2AC17,H2AC20,H2BC13,H2BC9,H2BC17,H2BC21,H3C1,H3C4,H3C3,H3C6,H3C8,H3C12,H3C10,H3C2,H4C4,H4C6,H4C12,H4C3,H4C8,H4C2,H4C5,H3C7,H2AC11,H2BC11,H2AC12,H4-16,H2BC18
1_Member	Reactome Gene Sets	R-HSA-2559582	Senescence-Associated Secretory Phenotype (SASP)	-46.3579	-43.625	29/112	3012,3013,3017,8294,8334,8335,8338,8340,8345,8348,8349,8350,8351,8352,8353,8355,8356,8357,8358,8360,8361,8362,8364,8365,8366,8367,8968,8970,121504	H2AC8,H2AC7,H2BC5,H4C9,H2AC6,H2AC4,H2AC20,H2BC13,H2BC9,H2BC17,H2BC21,H3C1,H3C4,H3C3,H3C6,H3C8,H3C12,H3C10,H3C2,H4C4,H4C6,H4C12,H4C3,H4C8,H4C2,H4C5,H3C7,H2BC11,H4-16
1_Member	Reactome Gene Sets	R-HSA-73864	RNA Polymerase I Transcription	-46.3579	-43.625	29/112	3012,3013,3017,8294,8334,8335,8338,8340,8345,8348,8349,8350,8351,8352,8353,8355,8356,8357,8358,8360,8361,8362,8364,8365,8366,8367,8968,8970,121504	H2AC8,H2AC7,H2BC5,H4C9,H2AC6,H2AC4,H2AC20,H2BC13,H2BC9,H2BC17,H2BC21,H3C1,H3C4,H3C3,H3C6,H3C8,H3C12,H3C10,H3C2,H4C4,H4C6,H4C12,H4C3,H4C8,H4C2,H4C5,H3C7,H2BC11,H4-16
1_Member	Reactome Gene Sets	R-HSA-1500620	Meiosis	-45.6107	-42.8883	29/118	3012,3013,3017,8294,8334,8335,8338,8340,8345,8348,8349,8350,8351,8352,8353,8355,8356,8357,8358,8360,8361,8362,8364,8365,8366,8367,8968,8970,121504	H2AC8,H2AC7,H2BC5,H4C9,H2AC6,H2AC4,H2AC20,H2BC13,H2BC9,H2BC17,H2BC21,H3C1,H3C4,H3C3,H3C6,H3C8,H3C12,H3C10,H3C2,H4C4,H4C6,H4C12,H4C3,H4C8,H4C2,H4C5,H3C7,H2BC11,H4-16
1_Member	Reactome Gene Sets	R-HSA-5617472	Activation of anterior HOX genes in hindbrain development during early embryogenesis	-45.2535	-42.5513	29/121	3012,3013,3017,8294,8334,8335,8338,8340,8345,8348,8349,8350,8351,8352,8353,8355,8356,8357,8358,8360,8361,8362,8364,8365,8366,8367,8968,8970,121504	H2AC8,H2AC7,H2BC5,H4C9,H2AC6,H2AC4,H2AC20,H2BC13,H2BC9,H2BC17,H2BC21,H3C1,H3C4,H3C3,H3C6,H3C8,H3C12,H3C10,H3C2,H4C4,H4C6,H4C12,H4C3,H4C8,H4C2,H4C5,H3C7,H2BC11,H4-16
1_Member	Reactome Gene Sets	R-HSA-5619507	Activation of HOX genes during differentiation	-45.2535	-42.5513	29/121	3012,3013,3017,8294,8334,8335,8338,8340,8345,8348,8349,8350,8351,8352,8353,8355,8356,8357,8358,8360,8361,8362,8364,8365,8366,8367,8968,8970,121504	H2AC8,H2AC7,H2BC5,H4C9,H2AC6,H2AC4,H2AC20,H2BC13,H2BC9,H2BC17,H2BC21,H3C1,H3C4,H3C3,H3C6,H3C8,H3C12,H3C10,H3C2,H4C4,H4C6,H4C12,H4C3,H4C8,H4C2,H4C5,H3C7,H2BC11,H4-16
1_Member	Reactome Gene Sets	R-HSA-68867	Assembly of the pre-replicative complex	-44.2402	-41.5573	29/130	3012,3013,3017,8294,8334,8335,8338,8340,8345,8348,8349,8350,8351,8352,8353,8355,8356,8357,8358,8360,8361,8362,8364,8365,8366,8367,8968,8970,121504	H2AC8,H2AC7,H2BC5,H4C9,H2AC6,H2AC4,H2AC20,H2BC13,H2BC9,H2BC17,H2BC21,H3C1,H3C4,H3C3,H3C6,H3C8,H3C12,H3C10,H3C2,H4C4,H4C6,H4C12,H4C3,H4C8,H4C2,H4C5,H3C7,H2BC11,H4-16
1_Member	Reactome Gene Sets	R-HSA-8939236	RUNX1 regulates transcription of genes involved in differentiation of HSCs	-44.2402	-41.5573	29/130	3012,3013,3017,8294,8334,8335,8338,8340,8345,8348,8349,8350,8351,8352,8353,8355,8356,8357,8358,8360,8361,8362,8364,8365,8366,8367,8968,8970,121504	H2AC8,H2AC7,H2BC5,H4C9,H2AC6,H2AC4,H2AC20,H2BC13,H2BC9,H2BC17,H2BC21,H3C1,H3C4,H3C3,H3C6,H3C8,H3C12,H3C10,H3C2,H4C4,H4C6,H4C12,H4C3,H4C8,H4C2,H4C5,H3C7,H2BC11,H4-16
1_Member	Reactome Gene Sets	R-HSA-211000	Gene Silencing by RNA	-43.4047	-40.7312	29/138	3012,3013,3017,8294,8334,8335,8338,8340,8345,8348,8349,8350,8351,8352,8353,8355,8356,8357,8358,8360,8361,8362,8364,8365,8366,8367,8968,8970,121504	H2AC8,H2AC7,H2BC5,H4C9,H2AC6,H2AC4,H2AC20,H2BC13,H2BC9,H2BC17,H2BC21,H3C1,H3C4,H3C3,H3C6,H3C8,H3C12,H3C10,H3C2,H4C4,H4C6,H4C12,H4C3,H4C8,H4C2,H4C5,H3C7,H2BC11,H4-16
1_Member	Reactome Gene Sets	R-HSA-68875	Mitotic Prophase	-43.0074	-40.343	29/142	3012,3013,3017,8294,8334,8335,8338,8340,8345,8348,8349,8350,8351,8352,8353,8355,8356,8357,8358,8360,8361,8362,8364,8365,8366,8367,8968,8970,121504	H2AC8,H2AC7,H2BC5,H4C9,H2AC6,H2AC4,H2AC20,H2BC13,H2BC9,H2BC17,H2BC21,H3C1,H3C4,H3C3,H3C6,H3C8,H3C12,H3C10,H3C2,H4C4,H4C6,H4C12,H4C3,H4C8,H4C2,H4C5,H3C7,H2BC11,H4-16
1_Member	Reactome Gene Sets	R-HSA-1474165	Reproduction	-42.9101	-40.2546	29/143	3012,3013,3017,8294,8334,8335,8338,8340,8345,8348,8349,8350,8351,8352,8353,8355,8356,8357,8358,8360,8361,8362,8364,8365,8366,8367,8968,8970,121504	H2AC8,H2AC7,H2BC5,H4C9,H2AC6,H2AC4,H2AC20,H2BC13,H2BC9,H2BC17,H2BC21,H3C1,H3C4,H3C3,H3C6,H3C8,H3C12,H3C10,H3C2,H4C4,H4C6,H4C12,H4C3,H4C8,H4C2,H4C5,H3C7,H2BC11,H4-16
1_Member	Reactome Gene Sets	R-HSA-69002	DNA Replication Pre-Initiation	-42.5282	-39.8815	29/147	3012,3013,3017,8294,8334,8335,8338,8340,8345,8348,8349,8350,8351,8352,8353,8355,8356,8357,8358,8360,8361,8362,8364,8365,8366,8367,8968,8970,121504	H2AC8,H2AC7,H2BC5,H4C9,H2AC6,H2AC4,H2AC20,H2BC13,H2BC9,H2BC17,H2BC21,H3C1,H3C4,H3C3,H3C6,H3C8,H3C12,H3C10,H3C2,H4C4,H4C6,H4C12,H4C3,H4C8,H4C2,H4C5,H3C7,H2BC11,H4-16
1_Member	Reactome Gene Sets	R-HSA-212165	Epigenetic regulation of gene expression	-42.3416	-39.7036	29/149	3012,3013,3017,8294,8334,8335,8338,8340,8345,8348,8349,8350,8351,8352,8353,8355,8356,8357,8358,8360,8361,8362,8364,8365,8366,8367,8968,8970,121504	H2AC8,H2AC7,H2BC5,H4C9,H2AC6,H2AC4,H2AC20,H2BC13,H2BC9,H2BC17,H2BC21,H3C1,H3C4,H3C3,H3C6,H3C8,H3C12,H3C10,H3C2,H4C4,H4C6,H4C12,H4C3,H4C8,H4C2,H4C5,H3C7,H2BC11,H4-16
1_Member	Reactome Gene Sets	R-HSA-9018519	Estrogen-dependent gene expression	-42.2494	-39.6198	29/150	3012,3013,3017,8294,8334,8335,8338,8340,8345,8348,8349,8350,8351,8352,8353,8355,8356,8357,8358,8360,8361,8362,8364,8365,8366,8367,8968,8970,121504	H2AC8,H2AC7,H2BC5,H4C9,H2AC6,H2AC4,H2AC20,H2BC13,H2BC9,H2BC17,H2BC21,H3C1,H3C4,H3C3,H3C6,H3C8,H3C12,H3C10,H3C2,H4C4,H4C6,H4C12,H4C3,H4C8,H4C2,H4C5,H3C7,H2BC11,H4-16
1_Member	Reactome Gene Sets	R-HSA-2559586	DNA Damage/Telomere Stress Induced Senescence	-42.2051	-39.5837	25/80	3006,3007,3008,3009,3012,3013,3017,3024,8294,8334,8335,8338,8340,8345,8348,8349,8360,8361,8362,8364,8365,8366,8367,8970,121504	H1-2,H1-3,H1-4,H1-5,H2AC8,H2AC7,H2BC5,H1-1,H4C9,H2AC6,H2AC4,H2AC20,H2BC13,H2BC9,H2BC17,H2BC21,H4C4,H4C6,H4C12,H4C3,H4C8,H4C2,H4C5,H2BC11,H4-16
1_Member	GO Biological Processes	GO:0031497	chromatin assembly	-42.0472	-39.434	30/175	3006,3007,3008,3009,3017,3024,8294,8340,8345,8348,8349,8350,8351,8352,8353,8355,8356,8357,8358,8360,8361,8362,8364,8365,8366,8367,8968,8970,121504,440689	H1-2,H1-3,H1-4,H1-5,H2BC5,H1-1,H4C9,H2BC13,H2BC9,H2BC17,H2BC21,H3C1,H3C4,H3C3,H3C6,H3C8,H3C12,H3C10,H3C2,H4C4,H4C6,H4C12,H4C3,H4C8,H4C2,H4C5,H3C7,H2BC11,H4-16,H2BC18
1_Member	GO Biological Processes	GO:0034728	nucleosome organization	-41.8875	-39.2823	30/177	3006,3007,3008,3009,3017,3024,8294,8340,8345,8348,8349,8350,8351,8352,8353,8355,8356,8357,8358,8360,8361,8362,8364,8365,8366,8367,8968,8970,121504,440689	H1-2,H1-3,H1-4,H1-5,H2BC5,H1-1,H4C9,H2BC13,H2BC9,H2BC17,H2BC21,H3C1,H3C4,H3C3,H3C6,H3C8,H3C12,H3C10,H3C2,H4C4,H4C6,H4C12,H4C3,H4C8,H4C2,H4C5,H3C7,H2BC11,H4-16,H2BC18
1_Member	GO Biological Processes	GO:0065004	protein-DNA complex assembly	-41.118	-38.5206	30/187	3006,3007,3008,3009,3017,3024,8294,8340,8345,8348,8349,8350,8351,8352,8353,8355,8356,8357,8358,8360,8361,8362,8364,8365,8366,8367,8968,8970,121504,440689	H1-2,H1-3,H1-4,H1-5,H2BC5,H1-1,H4C9,H2BC13,H2BC9,H2BC17,H2BC21,H3C1,H3C4,H3C3,H3C6,H3C8,H3C12,H3C10,H3C2,H4C4,H4C6,H4C12,H4C3,H4C8,H4C2,H4C5,H3C7,H2BC11,H4-16,H2BC18
1_Member	GO Biological Processes	GO:0006333	chromatin assembly or disassembly	-40.5345	-37.9447	30/195	3006,3007,3008,3009,3017,3024,8294,8340,8345,8348,8349,8350,8351,8352,8353,8355,8356,8357,8358,8360,8361,8362,8364,8365,8366,8367,8968,8970,121504,440689	H1-2,H1-3,H1-4,H1-5,H2BC5,H1-1,H4C9,H2BC13,H2BC9,H2BC17,H2BC21,H3C1,H3C4,H3C3,H3C6,H3C8,H3C12,H3C10,H3C2,H4C4,H4C6,H4C12,H4C3,H4C8,H4C2,H4C5,H3C7,H2BC11,H4-16,H2BC18
1_Member	Reactome Gene Sets	R-HSA-69306	DNA Replication	-39.0356	-36.4534	29/190	3012,3013,3017,8294,8334,8335,8338,8340,8345,8348,8349,8350,8351,8352,8353,8355,8356,8357,8358,8360,8361,8362,8364,8365,8366,8367,8968,8970,121504	H2AC8,H2AC7,H2BC5,H4C9,H2AC6,H2AC4,H2AC20,H2BC13,H2BC9,H2BC17,H2BC21,H3C1,H3C4,H3C3,H3C6,H3C8,H3C12,H3C10,H3C2,H4C4,H4C6,H4C12,H4C3,H4C8,H4C2,H4C5,H3C7,H2BC11,H4-16
1_Member	GO Biological Processes	GO:0006323	DNA packaging	-38.9931	-36.4183	30/218	3006,3007,3008,3009,3017,3024,8294,8340,8345,8348,8349,8350,8351,8352,8353,8355,8356,8357,8358,8360,8361,8362,8364,8365,8366,8367,8968,8970,121504,440689	H1-2,H1-3,H1-4,H1-5,H2BC5,H1-1,H4C9,H2BC13,H2BC9,H2BC17,H2BC21,H3C1,H3C4,H3C3,H3C6,H3C8,H3C12,H3C10,H3C2,H4C4,H4C6,H4C12,H4C3,H4C8,H4C2,H4C5,H3C7,H2BC11,H4-16,H2BC18
1_Member	Reactome Gene Sets	R-HSA-8939211	ESR-mediated signaling	-38.6816	-36.1142	30/223	3012,3013,3017,8294,8334,8335,8338,8340,8345,8348,8349,8350,8351,8352,8353,8355,8356,8357,8358,8360,8361,8362,8364,8365,8366,8367,8968,8970,121504,255324	H2AC8,H2AC7,H2BC5,H4C9,H2AC6,H2AC4,H2AC20,H2BC13,H2BC9,H2BC17,H2BC21,H3C1,H3C4,H3C3,H3C6,H3C8,H3C12,H3C10,H3C2,H4C4,H4C6,H4C12,H4C3,H4C8,H4C2,H4C5,H3C7,H2BC11,H4-16,EPGN
1_Member	Reactome Gene Sets	R-HSA-201681	TCF dependent signaling in response to WNT	-38.0809	-35.5206	30/233	3012,3013,3017,7474,8294,8334,8335,8338,8340,8345,8348,8349,8350,8351,8352,8353,8355,8356,8357,8358,8360,8361,8362,8364,8365,8366,8367,8968,8970,121504	H2AC8,H2AC7,H2BC5,WNT5A,H4C9,H2AC6,H2AC4,H2AC20,H2BC13,H2BC9,H2BC17,H2BC21,H3C1,H3C4,H3C3,H3C6,H3C8,H3C12,H3C10,H3C2,H4C4,H4C6,H4C12,H4C3,H4C8,H4C2,H4C5,H3C7,H2BC11,H4-16
1_Member	GO Biological Processes	GO:0071824	protein-DNA complex subunit organization	-37.6769	-35.1237	30/240	3006,3007,3008,3009,3017,3024,8294,8340,8345,8348,8349,8350,8351,8352,8353,8355,8356,8357,8358,8360,8361,8362,8364,8365,8366,8367,8968,8970,121504,440689	H1-2,H1-3,H1-4,H1-5,H2BC5,H1-1,H4C9,H2BC13,H2BC9,H2BC17,H2BC21,H3C1,H3C4,H3C3,H3C6,H3C8,H3C12,H3C10,H3C2,H4C4,H4C6,H4C12,H4C3,H4C8,H4C2,H4C5,H3C7,H2BC11,H4-16,H2BC18
1_Member	GO Biological Processes	GO:0006338	chromatin remodeling	-36.2303	-33.684	30/267	3006,3007,3008,3009,3017,3024,8294,8340,8345,8348,8349,8350,8351,8352,8353,8355,8356,8357,8358,8360,8361,8362,8364,8365,8366,8367,8968,8970,121504,440689	H1-2,H1-3,H1-4,H1-5,H2BC5,H1-1,H4C9,H2BC13,H2BC9,H2BC17,H2BC21,H3C1,H3C4,H3C3,H3C6,H3C8,H3C12,H3C10,H3C2,H4C4,H4C6,H4C12,H4C3,H4C8,H4C2,H4C5,H3C7,H2BC11,H4-16,H2BC18
1_Member	GO Biological Processes	GO:0006335	DNA replication-dependent chromatin assembly	-36.1932	-33.6605	18/32	8294,8350,8351,8352,8353,8355,8356,8357,8358,8360,8361,8362,8364,8365,8366,8367,8968,121504	H4C9,H3C1,H3C4,H3C3,H3C6,H3C8,H3C12,H3C10,H3C2,H4C4,H4C6,H4C12,H4C3,H4C8,H4C2,H4C5,H3C7,H4-16
1_Member	GO Biological Processes	GO:0034723	DNA replication-dependent chromatin organization	-36.1932	-33.6605	18/32	8294,8350,8351,8352,8353,8355,8356,8357,8358,8360,8361,8362,8364,8365,8366,8367,8968,121504	H4C9,H3C1,H3C4,H3C3,H3C6,H3C8,H3C12,H3C10,H3C2,H4C4,H4C6,H4C12,H4C3,H4C8,H4C2,H4C5,H3C7,H4-16
1_Member	Reactome Gene Sets	R-HSA-157118	Signaling by NOTCH	-36.1555	-33.6294	29/236	3012,3013,3017,8294,8334,8335,8338,8340,8345,8348,8349,8350,8351,8352,8353,8355,8356,8357,8358,8360,8361,8362,8364,8365,8366,8367,8968,8970,121504	H2AC8,H2AC7,H2BC5,H4C9,H2AC6,H2AC4,H2AC20,H2BC13,H2BC9,H2BC17,H2BC21,H3C1,H3C4,H3C3,H3C6,H3C8,H3C12,H3C10,H3C2,H4C4,H4C6,H4C12,H4C3,H4C8,H4C2,H4C5,H3C7,H2BC11,H4-16
1_Member	Reactome Gene Sets	R-HSA-8878171	Transcriptional regulation by RUNX1	-35.9894	-33.4699	29/239	3012,3013,3017,8294,8334,8335,8338,8340,8345,8348,8349,8350,8351,8352,8353,8355,8356,8357,8358,8360,8361,8362,8364,8365,8366,8367,8968,8970,121504	H2AC8,H2AC7,H2BC5,H4C9,H2AC6,H2AC4,H2AC20,H2BC13,H2BC9,H2BC17,H2BC21,H3C1,H3C4,H3C3,H3C6,H3C8,H3C12,H3C10,H3C2,H4C4,H4C6,H4C12,H4C3,H4C8,H4C2,H4C5,H3C7,H2BC11,H4-16
1_Member	Reactome Gene Sets	R-HSA-171306	Packaging Of Telomere Ends	-35.863	-33.3499	20/52	3012,3013,3017,8294,8334,8335,8338,8340,8345,8348,8349,8360,8361,8362,8364,8365,8366,8367,8970,121504	H2AC8,H2AC7,H2BC5,H4C9,H2AC6,H2AC4,H2AC20,H2BC13,H2BC9,H2BC17,H2BC21,H4C4,H4C6,H4C12,H4C3,H4C8,H4C2,H4C5,H2BC11,H4-16
1_Member	Reactome Gene Sets	R-HSA-110330	Recognition and association of DNA glycosylase with site containing an affected purine	-35.0729	-32.5785	20/56	3012,3013,3017,8294,8334,8335,8338,8340,8345,8348,8349,8360,8361,8362,8364,8365,8366,8367,8970,121504	H2AC8,H2AC7,H2BC5,H4C9,H2AC6,H2AC4,H2AC20,H2BC13,H2BC9,H2BC17,H2BC21,H4C4,H4C6,H4C12,H4C3,H4C8,H4C2,H4C5,H2BC11,H4-16
1_Member	Reactome Gene Sets	R-HSA-110331	Cleavage of the damaged purine	-35.0729	-32.5785	20/56	3012,3013,3017,8294,8334,8335,8338,8340,8345,8348,8349,8360,8361,8362,8364,8365,8366,8367,8970,121504	H2AC8,H2AC7,H2BC5,H4C9,H2AC6,H2AC4,H2AC20,H2BC13,H2BC9,H2BC17,H2BC21,H4C4,H4C6,H4C12,H4C3,H4C8,H4C2,H4C5,H2BC11,H4-16
1_Member	Reactome Gene Sets	R-HSA-73927	Depurination	-35.0729	-32.5785	20/56	3012,3013,3017,8294,8334,8335,8338,8340,8345,8348,8349,8360,8361,8362,8364,8365,8366,8367,8970,121504	H2AC8,H2AC7,H2BC5,H4C9,H2AC6,H2AC4,H2AC20,H2BC13,H2BC9,H2BC17,H2BC21,H4C4,H4C6,H4C12,H4C3,H4C8,H4C2,H4C5,H2BC11,H4-16
1_Member	Reactome Gene Sets	R-HSA-9006931	Signaling by Nuclear Receptors	-34.7082	-32.2199	30/299	3012,3013,3017,8294,8334,8335,8338,8340,8345,8348,8349,8350,8351,8352,8353,8355,8356,8357,8358,8360,8361,8362,8364,8365,8366,8367,8968,8970,121504,255324	H2AC8,H2AC7,H2BC5,H4C9,H2AC6,H2AC4,H2AC20,H2BC13,H2BC9,H2BC17,H2BC21,H3C1,H3C4,H3C3,H3C6,H3C8,H3C12,H3C10,H3C2,H4C4,H4C6,H4C12,H4C3,H4C8,H4C2,H4C5,H3C7,H2BC11,H4-16,EPGN
1_Member	Reactome Gene Sets	R-HSA-110328	Recognition and association of DNA glycosylase with site containing an affected pyrimidine	-34.179	-31.7085	20/61	3012,3013,3017,8294,8334,8335,8338,8340,8345,8348,8349,8360,8361,8362,8364,8365,8366,8367,8970,121504	H2AC8,H2AC7,H2BC5,H4C9,H2AC6,H2AC4,H2AC20,H2BC13,H2BC9,H2BC17,H2BC21,H4C4,H4C6,H4C12,H4C3,H4C8,H4C2,H4C5,H2BC11,H4-16
1_Member	Reactome Gene Sets	R-HSA-110329	Cleavage of the damaged pyrimidine	-34.179	-31.7085	20/61	3012,3013,3017,8294,8334,8335,8338,8340,8345,8348,8349,8360,8361,8362,8364,8365,8366,8367,8970,121504	H2AC8,H2AC7,H2BC5,H4C9,H2AC6,H2AC4,H2AC20,H2BC13,H2BC9,H2BC17,H2BC21,H4C4,H4C6,H4C12,H4C3,H4C8,H4C2,H4C5,H2BC11,H4-16
1_Member	Reactome Gene Sets	R-HSA-73928	Depyrimidination	-34.179	-31.7085	20/61	3012,3013,3017,8294,8334,8335,8338,8340,8345,8348,8349,8360,8361,8362,8364,8365,8366,8367,8970,121504	H2AC8,H2AC7,H2BC5,H4C9,H2AC6,H2AC4,H2AC20,H2BC13,H2BC9,H2BC17,H2BC21,H4C4,H4C6,H4C12,H4C3,H4C8,H4C2,H4C5,H2BC11,H4-16
1_Member	GO Biological Processes	GO:0071103	DNA conformation change	-34.0542	-31.5894	30/314	3006,3007,3008,3009,3017,3024,8294,8340,8345,8348,8349,8350,8351,8352,8353,8355,8356,8357,8358,8360,8361,8362,8364,8365,8366,8367,8968,8970,121504,440689	H1-2,H1-3,H1-4,H1-5,H2BC5,H1-1,H4C9,H2BC13,H2BC9,H2BC17,H2BC21,H3C1,H3C4,H3C3,H3C6,H3C8,H3C12,H3C10,H3C2,H4C4,H4C6,H4C12,H4C3,H4C8,H4C2,H4C5,H3C7,H2BC11,H4-16,H2BC18
1_Member	Reactome Gene Sets	R-HSA-73929	Base-Excision Repair, AP Site Formation	-33.8464	-31.3872	20/63	3012,3013,3017,8294,8334,8335,8338,8340,8345,8348,8349,8360,8361,8362,8364,8365,8366,8367,8970,121504	H2AC8,H2AC7,H2BC5,H4C9,H2AC6,H2AC4,H2AC20,H2BC13,H2BC9,H2BC17,H2BC21,H4C4,H4C6,H4C12,H4C3,H4C8,H4C2,H4C5,H2BC11,H4-16
1_Member	Reactome Gene Sets	R-HSA-195721	Signaling by WNT	-33.3125	-30.8589	30/332	3012,3013,3017,7474,8294,8334,8335,8338,8340,8345,8348,8349,8350,8351,8352,8353,8355,8356,8357,8358,8360,8361,8362,8364,8365,8366,8367,8968,8970,121504	H2AC8,H2AC7,H2BC5,WNT5A,H4C9,H2AC6,H2AC4,H2AC20,H2BC13,H2BC9,H2BC17,H2BC21,H3C1,H3C4,H3C3,H3C6,H3C8,H3C12,H3C10,H3C2,H4C4,H4C6,H4C12,H4C3,H4C8,H4C2,H4C5,H3C7,H2BC11,H4-16
1_Member	Reactome Gene Sets	R-HSA-9670095	Inhibition of DNA recombination at telomere	-33.0678	-30.6198	20/68	3012,3013,3017,8294,8334,8335,8338,8340,8345,8348,8349,8360,8361,8362,8364,8365,8366,8367,8970,121504	H2AC8,H2AC7,H2BC5,H4C9,H2AC6,H2AC4,H2AC20,H2BC13,H2BC9,H2BC17,H2BC21,H4C4,H4C6,H4C12,H4C3,H4C8,H4C2,H4C5,H2BC11,H4-16
1_Member	Reactome Gene Sets	R-HSA-606279	Deposition of new CENPA-containing nucleosomes at the centromere	-32.2192	-29.7821	20/74	3012,3013,3017,8294,8334,8335,8338,8340,8345,8348,8349,8360,8361,8362,8364,8365,8366,8367,8970,121504	H2AC8,H2AC7,H2BC5,H4C9,H2AC6,H2AC4,H2AC20,H2BC13,H2BC9,H2BC17,H2BC21,H4C4,H4C6,H4C12,H4C3,H4C8,H4C2,H4C5,H2BC11,H4-16
1_Member	Reactome Gene Sets	R-HSA-774815	Nucleosome assembly	-32.2192	-29.7821	20/74	3012,3013,3017,8294,8334,8335,8338,8340,8345,8348,8349,8360,8361,8362,8364,8365,8366,8367,8970,121504	H2AC8,H2AC7,H2BC5,H4C9,H2AC6,H2AC4,H2AC20,H2BC13,H2BC9,H2BC17,H2BC21,H4C4,H4C6,H4C12,H4C3,H4C8,H4C2,H4C5,H2BC11,H4-16
1_Member	Reactome Gene Sets	R-HSA-195258	RHO GTPase Effectors	-31.9228	-29.491	29/327	3012,3013,3017,8294,8334,8335,8338,8340,8345,8348,8349,8350,8351,8352,8353,8355,8356,8357,8358,8360,8361,8362,8364,8365,8366,8367,8968,8970,121504	H2AC8,H2AC7,H2BC5,H4C9,H2AC6,H2AC4,H2AC20,H2BC13,H2BC9,H2BC17,H2BC21,H3C1,H3C4,H3C3,H3C6,H3C8,H3C12,H3C10,H3C2,H4C4,H4C6,H4C12,H4C3,H4C8,H4C2,H4C5,H3C7,H2BC11,H4-16
1_Member	Reactome Gene Sets	R-HSA-3214842	HDMs demethylate histones	-31.6317	-29.2051	18/50	8294,8350,8351,8352,8353,8355,8356,8357,8358,8360,8361,8362,8364,8365,8366,8367,8968,121504	H4C9,H3C1,H3C4,H3C3,H3C6,H3C8,H3C12,H3C10,H3C2,H4C4,H4C6,H4C12,H4C3,H4C8,H4C2,H4C5,H3C7,H4-16
1_Member	Reactome Gene Sets	R-HSA-1221632	Meiotic synapsis	-31.5718	-29.1504	20/79	3012,3013,3017,8294,8334,8335,8338,8340,8345,8348,8349,8360,8361,8362,8364,8365,8366,8367,8970,121504	H2AC8,H2AC7,H2BC5,H4C9,H2AC6,H2AC4,H2AC20,H2BC13,H2BC9,H2BC17,H2BC21,H4C4,H4C6,H4C12,H4C3,H4C8,H4C2,H4C5,H2BC11,H4-16
1_Member	Reactome Gene Sets	R-HSA-2262752	Cellular responses to stress	-30.3018	-27.8856	36/757	3006,3007,3008,3009,3012,3013,3017,3024,4217,8294,8334,8335,8338,8340,8345,8348,8349,8350,8351,8352,8353,8355,8356,8357,8358,8360,8361,8362,8364,8365,8366,8367,8968,8970,8994,121504	H1-2,H1-3,H1-4,H1-5,H2AC8,H2AC7,H2BC5,H1-1,MAP3K5,H4C9,H2AC6,H2AC4,H2AC20,H2BC13,H2BC9,H2BC17,H2BC21,H3C1,H3C4,H3C3,H3C6,H3C8,H3C12,H3C10,H3C2,H4C4,H4C6,H4C12,H4C3,H4C8,H4C2,H4C5,H3C7,H2BC11,LIMD1,H4-16
1_Member	Reactome Gene Sets	R-HSA-73884	Base Excision Repair	-30.089	-27.6778	20/92	3012,3013,3017,8294,8334,8335,8338,8340,8345,8348,8349,8360,8361,8362,8364,8365,8366,8367,8970,121504	H2AC8,H2AC7,H2BC5,H4C9,H2AC6,H2AC4,H2AC20,H2BC13,H2BC9,H2BC17,H2BC21,H4C4,H4C6,H4C12,H4C3,H4C8,H4C2,H4C5,H2BC11,H4-16
1_Member	Reactome Gene Sets	R-HSA-8953897	Cellular responses to stimuli	-30.0225	-27.6164	36/771	3006,3007,3008,3009,3012,3013,3017,3024,4217,8294,8334,8335,8338,8340,8345,8348,8349,8350,8351,8352,8353,8355,8356,8357,8358,8360,8361,8362,8364,8365,8366,8367,8968,8970,8994,121504	H1-2,H1-3,H1-4,H1-5,H2AC8,H2AC7,H2BC5,H1-1,MAP3K5,H4C9,H2AC6,H2AC4,H2AC20,H2BC13,H2BC9,H2BC17,H2BC21,H3C1,H3C4,H3C3,H3C6,H3C8,H3C12,H3C10,H3C2,H4C4,H4C6,H4C12,H4C3,H4C8,H4C2,H4C5,H3C7,H2BC11,LIMD1,H4-16
1_Member	Reactome Gene Sets	R-HSA-68886	M Phase	-28.8053	-26.4041	29/418	3012,3013,3017,8294,8334,8335,8338,8340,8345,8348,8349,8350,8351,8352,8353,8355,8356,8357,8358,8360,8361,8362,8364,8365,8366,8367,8968,8970,121504	H2AC8,H2AC7,H2BC5,H4C9,H2AC6,H2AC4,H2AC20,H2BC13,H2BC9,H2BC17,H2BC21,H3C1,H3C4,H3C3,H3C6,H3C8,H3C12,H3C10,H3C2,H4C4,H4C6,H4C12,H4C3,H4C8,H4C2,H4C5,H3C7,H2BC11,H4-16
1_Member	WikiPathways	WP2369	Histone modifications	-28.5468	-26.1506	18/70	8294,8350,8351,8352,8353,8355,8356,8357,8358,8360,8361,8362,8364,8365,8366,8367,8968,121504	H4C9,H3C1,H3C4,H3C3,H3C6,H3C8,H3C12,H3C10,H3C2,H4C4,H4C6,H4C12,H4C3,H4C8,H4C2,H4C5,H3C7,H4-16
1_Member	Reactome Gene Sets	R-HSA-3214841	PKMTs methylate histone lysines	-28.4211	-26.0297	18/71	8294,8350,8351,8352,8353,8355,8356,8357,8358,8360,8361,8362,8364,8365,8366,8367,8968,121504	H4C9,H3C1,H3C4,H3C3,H3C6,H3C8,H3C12,H3C10,H3C2,H4C4,H4C6,H4C12,H4C3,H4C8,H4C2,H4C5,H3C7,H4-16
1_Member	Reactome Gene Sets	R-HSA-157579	Telomere Maintenance	-28.1363	-25.7497	20/113	3012,3013,3017,8294,8334,8335,8338,8340,8345,8348,8349,8360,8361,8362,8364,8365,8366,8367,8970,121504	H2AC8,H2AC7,H2BC5,H4C9,H2AC6,H2AC4,H2AC20,H2BC13,H2BC9,H2BC17,H2BC21,H4C4,H4C6,H4C12,H4C3,H4C8,H4C2,H4C5,H2BC11,H4-16
1_Member	GO Biological Processes	GO:0032200	telomere organization	-26.5088	-24.127	19/110	7012,8294,8350,8351,8352,8353,8355,8356,8357,8358,8360,8361,8362,8364,8365,8366,8367,8968,121504	TERC,H4C9,H3C1,H3C4,H3C3,H3C6,H3C8,H3C12,H3C10,H3C2,H4C4,H4C6,H4C12,H4C3,H4C8,H4C2,H4C5,H3C7,H4-16
1_Member	GO Biological Processes	GO:0006325	chromatin organization	-26.2988	-23.9216	30/569	3006,3007,3008,3009,3017,3024,8294,8340,8345,8348,8349,8350,8351,8352,8353,8355,8356,8357,8358,8360,8361,8362,8364,8365,8366,8367,8968,8970,121504,440689	H1-2,H1-3,H1-4,H1-5,H2BC5,H1-1,H4C9,H2BC13,H2BC9,H2BC17,H2BC21,H3C1,H3C4,H3C3,H3C6,H3C8,H3C12,H3C10,H3C2,H4C4,H4C6,H4C12,H4C3,H4C8,H4C2,H4C5,H3C7,H2BC11,H4-16,H2BC18
1_Member	Reactome Gene Sets	R-HSA-73886	Chromosome Maintenance	-26.0845	-23.712	20/141	3012,3013,3017,8294,8334,8335,8338,8340,8345,8348,8349,8360,8361,8362,8364,8365,8366,8367,8970,121504	H2AC8,H2AC7,H2BC5,H4C9,H2AC6,H2AC4,H2AC20,H2BC13,H2BC9,H2BC17,H2BC21,H4C4,H4C6,H4C12,H4C3,H4C8,H4C2,H4C5,H2BC11,H4-16
1_Member	Reactome Gene Sets	R-HSA-69278	Cell Cycle, Mitotic	-25.1649	-22.797	29/560	3012,3013,3017,8294,8334,8335,8338,8340,8345,8348,8349,8350,8351,8352,8353,8355,8356,8357,8358,8360,8361,8362,8364,8365,8366,8367,8968,8970,121504	H2AC8,H2AC7,H2BC5,H4C9,H2AC6,H2AC4,H2AC20,H2BC13,H2BC9,H2BC17,H2BC21,H3C1,H3C4,H3C3,H3C6,H3C8,H3C12,H3C10,H3C2,H4C4,H4C6,H4C12,H4C3,H4C8,H4C2,H4C5,H3C7,H2BC11,H4-16
1_Member	Reactome Gene Sets	R-HSA-1640170	Cell Cycle	-22.5988	-20.2355	29/691	3012,3013,3017,8294,8334,8335,8338,8340,8345,8348,8349,8350,8351,8352,8353,8355,8356,8357,8358,8360,8361,8362,8364,8365,8366,8367,8968,8970,121504	H2AC8,H2AC7,H2BC5,H4C9,H2AC6,H2AC4,H2AC20,H2BC13,H2BC9,H2BC17,H2BC21,H3C1,H3C4,H3C3,H3C6,H3C8,H3C12,H3C10,H3C2,H4C4,H4C6,H4C12,H4C3,H4C8,H4C2,H4C5,H3C7,H2BC11,H4-16
1_Member	Reactome Gene Sets	R-HSA-5693571	Nonhomologous End-Joining (NHEJ)	-22.5856	-20.2267	15/69	3017,8294,8340,8345,8348,8349,8360,8361,8362,8364,8365,8366,8367,8970,121504	H2BC5,H4C9,H2BC13,H2BC9,H2BC17,H2BC21,H4C4,H4C6,H4C12,H4C3,H4C8,H4C2,H4C5,H2BC11,H4-16
1_Member	Reactome Gene Sets	R-HSA-194315	Signaling by Rho GTPases	-22.3221	-19.9677	29/707	3012,3013,3017,8294,8334,8335,8338,8340,8345,8348,8349,8350,8351,8352,8353,8355,8356,8357,8358,8360,8361,8362,8364,8365,8366,8367,8968,8970,121504	H2AC8,H2AC7,H2BC5,H4C9,H2AC6,H2AC4,H2AC20,H2BC13,H2BC9,H2BC17,H2BC21,H3C1,H3C4,H3C3,H3C6,H3C8,H3C12,H3C10,H3C2,H4C4,H4C6,H4C12,H4C3,H4C8,H4C2,H4C5,H3C7,H2BC11,H4-16
1_Member	Reactome Gene Sets	R-HSA-9716542	Signaling by Rho GTPases, Miro GTPases and RHOBTB3	-22.0521	-19.7021	29/723	3012,3013,3017,8294,8334,8335,8338,8340,8345,8348,8349,8350,8351,8352,8353,8355,8356,8357,8358,8360,8361,8362,8364,8365,8366,8367,8968,8970,121504	H2AC8,H2AC7,H2BC5,H4C9,H2AC6,H2AC4,H2AC20,H2BC13,H2BC9,H2BC17,H2BC21,H3C1,H3C4,H3C3,H3C6,H3C8,H3C12,H3C10,H3C2,H4C4,H4C6,H4C12,H4C3,H4C8,H4C2,H4C5,H3C7,H2BC11,H4-16
1_Member	Reactome Gene Sets	R-HSA-5693565	Recruitment and ATM-mediated phosphorylation of repair and signaling proteins at DNA double strand breaks	-21.8014	-19.4557	15/77	3017,8294,8340,8345,8348,8349,8360,8361,8362,8364,8365,8366,8367,8970,121504	H2BC5,H4C9,H2BC13,H2BC9,H2BC17,H2BC21,H4C4,H4C6,H4C12,H4C3,H4C8,H4C2,H4C5,H2BC11,H4-16
1_Member	Reactome Gene Sets	R-HSA-5693606	DNA Double Strand Break Response	-21.7098	-19.3685	15/78	3017,8294,8340,8345,8348,8349,8360,8361,8362,8364,8365,8366,8367,8970,121504	H2BC5,H4C9,H2BC13,H2BC9,H2BC17,H2BC21,H4C4,H4C6,H4C12,H4C3,H4C8,H4C2,H4C5,H2BC11,H4-16
1_Member	Reactome Gene Sets	R-HSA-69473	G2/M DNA damage checkpoint	-20.3282	-17.9911	15/95	3017,8294,8340,8345,8348,8349,8360,8361,8362,8364,8365,8366,8367,8970,121504	H2BC5,H4C9,H2BC13,H2BC9,H2BC17,H2BC21,H4C4,H4C6,H4C12,H4C3,H4C8,H4C2,H4C5,H2BC11,H4-16
1_Member	Reactome Gene Sets	R-HSA-5693607	Processing of DNA double-strand break ends	-20.113	-17.7802	15/98	3017,8294,8340,8345,8348,8349,8360,8361,8362,8364,8365,8366,8367,8970,121504	H2BC5,H4C9,H2BC13,H2BC9,H2BC17,H2BC21,H4C4,H4C6,H4C12,H4C3,H4C8,H4C2,H4C5,H2BC11,H4-16
1_Member	Reactome Gene Sets	R-HSA-73894	DNA Repair	-18.4352	-16.1107	20/335	3012,3013,3017,8294,8334,8335,8338,8340,8345,8348,8349,8360,8361,8362,8364,8365,8366,8367,8970,121504	H2AC8,H2AC7,H2BC5,H4C9,H2AC6,H2AC4,H2AC20,H2BC13,H2BC9,H2BC17,H2BC21,H4C4,H4C6,H4C12,H4C3,H4C8,H4C2,H4C5,H2BC11,H4-16
1_Member	Reactome Gene Sets	R-HSA-5693567	HDR through Homologous Recombination (HRR) or Single Strand Annealing (SSA)	-18.0833	-15.7671	15/132	3017,8294,8340,8345,8348,8349,8360,8361,8362,8364,8365,8366,8367,8970,121504	H2BC5,H4C9,H2BC13,H2BC9,H2BC17,H2BC21,H4C4,H4C6,H4C12,H4C3,H4C8,H4C2,H4C5,H2BC11,H4-16
1_Member	Reactome Gene Sets	R-HSA-5693538	Homology Directed Repair	-17.7849	-15.4727	15/138	3017,8294,8340,8345,8348,8349,8360,8361,8362,8364,8365,8366,8367,8970,121504	H2BC5,H4C9,H2BC13,H2BC9,H2BC17,H2BC21,H4C4,H4C6,H4C12,H4C3,H4C8,H4C2,H4C5,H2BC11,H4-16
1_Member	GO Biological Processes	GO:0045653	negative regulation of megakaryocyte differentiation	-17.5693	-15.2611	9/18	8294,8360,8361,8362,8364,8365,8366,8367,121504	H4C9,H4C4,H4C6,H4C12,H4C3,H4C8,H4C2,H4C5,H4-16
1_Member	KEGG Pathway	hsa05203	Viral carcinogenesis	-16.6521	-14.3518	16/204	3017,8294,8340,8345,8348,8349,8360,8361,8362,8364,8365,8366,8367,8970,121504,440689	H2BC5,H4C9,H2BC13,H2BC9,H2BC17,H2BC21,H4C4,H4C6,H4C12,H4C3,H4C8,H4C2,H4C5,H2BC11,H4-16,H2BC18
1_Member	Reactome Gene Sets	R-HSA-5693532	DNA Double-Strand Break Repair	-16.5168	-14.2242	15/167	3017,8294,8340,8345,8348,8349,8360,8361,8362,8364,8365,8366,8367,8970,121504	H2BC5,H4C9,H2BC13,H2BC9,H2BC17,H2BC21,H4C4,H4C6,H4C12,H4C3,H4C8,H4C2,H4C5,H2BC11,H4-16
1_Member	Reactome Gene Sets	R-HSA-69481	G2/M Checkpoints	-16.5168	-14.2242	15/167	3017,8294,8340,8345,8348,8349,8360,8361,8362,8364,8365,8366,8367,8970,121504	H2BC5,H4C9,H2BC13,H2BC9,H2BC17,H2BC21,H4C4,H4C6,H4C12,H4C3,H4C8,H4C2,H4C5,H2BC11,H4-16
1_Member	GO Biological Processes	GO:0045652	regulation of megakaryocyte differentiation	-16.3656	-14.0769	10/36	3692,8294,8360,8361,8362,8364,8365,8366,8367,121504	EIF6,H4C9,H4C4,H4C6,H4C12,H4C3,H4C8,H4C2,H4C5,H4-16
1_Member	GO Biological Processes	GO:0006336	DNA replication-independent chromatin assembly	-14.6888	-12.4038	9/33	8294,8360,8361,8362,8364,8365,8366,8367,121504	H4C9,H4C4,H4C6,H4C12,H4C3,H4C8,H4C2,H4C5,H4-16
1_Member	GO Biological Processes	GO:0034724	DNA replication-independent chromatin organization	-14.5565	-12.2753	9/34	8294,8360,8361,8362,8364,8365,8366,8367,121504	H4C9,H4C4,H4C6,H4C12,H4C3,H4C8,H4C2,H4C5,H4-16
1_Member	Reactome Gene Sets	R-HSA-69620	Cell Cycle Checkpoints	-12.8869	-10.6241	15/293	3017,8294,8340,8345,8348,8349,8360,8361,8362,8364,8365,8366,8367,8970,121504	H2BC5,H4C9,H2BC13,H2BC9,H2BC17,H2BC21,H4C4,H4C6,H4C12,H4C3,H4C8,H4C2,H4C5,H2BC11,H4-16
1_Member	WikiPathways	WP5114	Nucleotide excision repair in xeroderma pigmentosum	-12.8413	-10.582	10/76	8294,8334,8360,8361,8362,8364,8365,8366,8367,121504	H4C9,H2AC6,H4C4,H4C6,H4C12,H4C3,H4C8,H4C2,H4C5,H4-16
1_Member	Reactome Gene Sets	R-HSA-4551638	SUMOylation of chromatin organization proteins	-11.4508	-9.19504	9/71	8294,8360,8361,8362,8364,8365,8366,8367,121504	H4C9,H4C4,H4C6,H4C12,H4C3,H4C8,H4C2,H4C5,H4-16
1_Member	GO Biological Processes	GO:0045638	negative regulation of myeloid cell differentiation	-10.4537	-8.205	9/91	8294,8360,8361,8362,8364,8365,8366,8367,121504	H4C9,H4C4,H4C6,H4C12,H4C3,H4C8,H4C2,H4C5,H4-16
1_Member	GO Biological Processes	GO:0006352	DNA-templated transcription, initiation	-10.2829	-8.03764	9/95	8294,8360,8361,8362,8364,8365,8366,8367,121504	H4C9,H4C4,H4C6,H4C12,H4C3,H4C8,H4C2,H4C5,H4-16
1_Member	GO Biological Processes	GO:0045637	regulation of myeloid cell differentiation	-9.70241	-7.46059	11/208	920,3692,8294,8360,8361,8362,8364,8365,8366,8367,121504	CD4,EIF6,H4C9,H4C4,H4C6,H4C12,H4C3,H4C8,H4C2,H4C5,H4-16
1_Member	GO Biological Processes	GO:1903706	regulation of hemopoiesis	-9.17624	-6.94456	13/371	920,3692,8294,8360,8361,8362,8364,8365,8366,8367,10125,84695,121504	CD4,EIF6,H4C9,H4C4,H4C6,H4C12,H4C3,H4C8,H4C2,H4C5,RASGRP1,LOXL3,H4-16
1_Member	Reactome Gene Sets	R-HSA-3108232	SUMO E3 ligases SUMOylate target proteins	-7.7687	-5.55018	9/182	8294,8360,8361,8362,8364,8365,8366,8367,121504	H4C9,H4C4,H4C6,H4C12,H4C3,H4C8,H4C2,H4C5,H4-16
1_Member	Reactome Gene Sets	R-HSA-2990846	SUMOylation	-7.64664	-5.43134	9/188	8294,8360,8361,8362,8364,8365,8366,8367,121504	H4C9,H4C4,H4C6,H4C12,H4C3,H4C8,H4C2,H4C5,H4-16
1_Member	GO Biological Processes	GO:0045596	negative regulation of cell differentiation	-6.06498	-3.86858	13/685	7474,8294,8360,8361,8362,8364,8365,8366,8367,8994,10468,84695,121504	WNT5A,H4C9,H4C4,H4C6,H4C12,H4C3,H4C8,H4C2,H4C5,LIMD1,FST,LOXL3,H4-16
1_Member	GO Biological Processes	GO:0097659	nucleic acid-templated transcription	-5.9358	-3.74551	10/388	6023,8294,8360,8361,8362,8364,8365,8366,8367,121504	RMRP,H4C9,H4C4,H4C6,H4C12,H4C3,H4C8,H4C2,H4C5,H4-16
1_Member	GO Biological Processes	GO:0032774	RNA biosynthetic process	-5.82682	-3.63956	10/399	6023,8294,8360,8361,8362,8364,8365,8366,8367,121504	RMRP,H4C9,H4C4,H4C6,H4C12,H4C3,H4C8,H4C2,H4C5,H4-16
1_Member	GO Biological Processes	GO:0034654	nucleobase-containing compound biosynthetic process	-5.07098	-2.89561	12/718	6023,7012,8294,8360,8361,8362,8364,8365,8366,8367,9200,121504	RMRP,TERC,H4C9,H4C4,H4C6,H4C12,H4C3,H4C8,H4C2,H4C5,HACD1,H4-16
1_Member	GO Biological Processes	GO:0006351	transcription, DNA-templated	-5.03994	-2.8704	9/386	8294,8360,8361,8362,8364,8365,8366,8367,121504	H4C9,H4C4,H4C6,H4C12,H4C3,H4C8,H4C2,H4C5,H4-16
1_Member	GO Biological Processes	GO:0018130	heterocycle biosynthetic process	-4.65995	-2.49616	12/790	6023,7012,8294,8360,8361,8362,8364,8365,8366,8367,9200,121504	RMRP,TERC,H4C9,H4C4,H4C6,H4C12,H4C3,H4C8,H4C2,H4C5,HACD1,H4-16
1_Member	GO Biological Processes	GO:0019438	aromatic compound biosynthetic process	-4.61183	-2.4509	12/799	6023,7012,8294,8360,8361,8362,8364,8365,8366,8367,9200,121504	RMRP,TERC,H4C9,H4C4,H4C6,H4C12,H4C3,H4C8,H4C2,H4C5,HACD1,H4-16
2_Summary	Reactome Gene Sets	R-HSA-5689880	Ub-specific processing proteases	-19.046	-16.7174	18/220	3012,3013,3017,8329,8330,8332,8334,8335,8336,8338,8340,8345,8348,8349,8969,8970,85235,440689	H2AC8,H2AC7,H2BC5,H2AC13,H2AC15,H2AC16,H2AC6,H2AC4,H2AC17,H2AC20,H2BC13,H2BC9,H2BC17,H2BC21,H2AC11,H2BC11,H2AC12,H2BC18
2_Member	Reactome Gene Sets	R-HSA-5689880	Ub-specific processing proteases	-19.046	-16.7174	18/220	3012,3013,3017,8329,8330,8332,8334,8335,8336,8338,8340,8345,8348,8349,8969,8970,85235,440689	H2AC8,H2AC7,H2BC5,H2AC13,H2AC15,H2AC16,H2AC6,H2AC4,H2AC17,H2AC20,H2BC13,H2BC9,H2BC17,H2BC21,H2AC11,H2BC11,H2AC12,H2BC18
2_Member	Reactome Gene Sets	R-HSA-5689901	Metalloprotease DUBs	-18.3365	-16.0162	11/37	3012,3013,8329,8330,8332,8334,8335,8336,8338,8969,85235	H2AC8,H2AC7,H2AC13,H2AC15,H2AC16,H2AC6,H2AC4,H2AC17,H2AC20,H2AC11,H2AC12
2_Member	Reactome Gene Sets	R-HSA-5688426	Deubiquitination	-16.685	-14.3808	18/298	3012,3013,3017,8329,8330,8332,8334,8335,8336,8338,8340,8345,8348,8349,8969,8970,85235,440689	H2AC8,H2AC7,H2BC5,H2AC13,H2AC15,H2AC16,H2AC6,H2AC4,H2AC17,H2AC20,H2BC13,H2BC9,H2BC17,H2BC21,H2AC11,H2BC11,H2AC12,H2BC18
2_Member	Reactome Gene Sets	R-HSA-5689603	UCH proteinases	-13.0992	-10.8328	11/102	3012,3013,8329,8330,8332,8334,8335,8336,8338,8969,85235	H2AC8,H2AC7,H2AC13,H2AC15,H2AC16,H2AC6,H2AC4,H2AC17,H2AC20,H2AC11,H2AC12
2_Member	KEGG Pathway	hsa04217	Necroptosis	-10.961	-8.70881	11/159	3012,3013,8329,8330,8332,8334,8335,8336,8338,8969,85235	H2AC8,H2AC7,H2AC13,H2AC15,H2AC16,H2AC6,H2AC4,H2AC17,H2AC20,H2AC11,H2AC12
3_Summary	Reactome Gene Sets	R-HSA-1266695	Interleukin-7 signaling	-14.305	-12.0275	9/36	8350,8351,8352,8353,8355,8356,8357,8358,8968,920,2149,10125	H3C1,H3C4,H3C3,H3C6,H3C8,H3C12,H3C10,H3C2,H3C7,CD4,F2R,RASGRP1
3_Member	Reactome Gene Sets	R-HSA-1266695	Interleukin-7 signaling	-14.305	-12.0275	9/36	8350,8351,8352,8353,8355,8356,8357,8358,8968	H3C1,H3C4,H3C3,H3C6,H3C8,H3C12,H3C10,H3C2,H3C7
3_Member	WikiPathways	WP4553	FBXL10 enhancement of MAP/ERK signaling in diffuse large B-cell lymphoma	-14.0691	-11.7953	9/38	8350,8351,8352,8353,8355,8356,8357,8358,8968	H3C1,H3C4,H3C3,H3C6,H3C8,H3C12,H3C10,H3C2,H3C7
3_Member	WikiPathways	WP4320	Effect of progerin on genes involved in Hutchinson-Gilford progeria syndrome	-13.9564	-11.6863	9/39	8350,8351,8352,8353,8355,8356,8357,8358,8968	H3C1,H3C4,H3C3,H3C6,H3C8,H3C12,H3C10,H3C2,H3C7
3_Member	GO Biological Processes	GO:0040029	regulation of gene expression, epigenetic	-9.53099	-7.29258	9/115	8350,8351,8352,8353,8355,8356,8357,8358,8968	H3C1,H3C4,H3C3,H3C6,H3C8,H3C12,H3C10,H3C2,H3C7
3_Member	Reactome Gene Sets	R-HSA-983231	Factors involved in megakaryocyte development and platelet production	-8.07136	-5.84958	9/168	8350,8351,8352,8353,8355,8356,8357,8358,8968	H3C1,H3C4,H3C3,H3C6,H3C8,H3C12,H3C10,H3C2,H3C7
3_Member	KEGG Pathway	hsa05202	Transcriptional misregulation in cancer	-7.56759	-5.3555	9/192	8350,8351,8352,8353,8355,8356,8357,8358,8968	H3C1,H3C4,H3C3,H3C6,H3C8,H3C12,H3C10,H3C2,H3C7
3_Member	KEGG Pathway	hsa05131	Shigellosis	-6.63353	-4.42463	9/247	8350,8351,8352,8353,8355,8356,8357,8358,8968	H3C1,H3C4,H3C3,H3C6,H3C8,H3C12,H3C10,H3C2,H3C7
3_Member	Reactome Gene Sets	R-HSA-449147	Signaling by Interleukins	-5.26265	-3.08434	10/462	920,8350,8351,8352,8353,8355,8356,8357,8358,8968	CD4,H3C1,H3C4,H3C3,H3C6,H3C8,H3C12,H3C10,H3C2,H3C7
3_Member	Reactome Gene Sets	R-HSA-109582	Hemostasis	-4.91861	-2.75196	11/621	2149,8350,8351,8352,8353,8355,8356,8357,8358,8968,10125	F2R,H3C1,H3C4,H3C3,H3C6,H3C8,H3C12,H3C10,H3C2,H3C7,RASGRP1
3_Member	Reactome Gene Sets	R-HSA-1280215	Cytokine Signaling in Immune system	-3.66924	-1.51951	10/715	920,8350,8351,8352,8353,8355,8356,8357,8358,8968	CD4,H3C1,H3C4,H3C3,H3C6,H3C8,H3C12,H3C10,H3C2,H3C7
4_Summary	Reactome Gene Sets	R-HSA-140342	Apoptosis induced DNA fragmentation	-9.21583	-6.98079	5/13	3006,3007,3008,3009,3024	H1-2,H1-3,H1-4,H1-5,H1-1
4_Member	Reactome Gene Sets	R-HSA-140342	Apoptosis induced DNA fragmentation	-9.21583	-6.98079	5/13	3006,3007,3008,3009,3024	H1-2,H1-3,H1-4,H1-5,H1-1
4_Member	Reactome Gene Sets	R-HSA-2559584	Formation of Senescence-Associated Heterochromatin Foci (SAHF)	-8.68876	-6.4604	5/16	3006,3007,3008,3009,3024	H1-2,H1-3,H1-4,H1-5,H1-1
4_Member	GO Biological Processes	GO:0016584	nucleosome positioning	-8.5387	-6.31365	5/17	3006,3007,3008,3009,3024	H1-2,H1-3,H1-4,H1-5,H1-1
4_Member	GO Biological Processes	GO:0030261	chromosome condensation	-6.37828	-4.17253	5/43	3006,3007,3008,3009,3024	H1-2,H1-3,H1-4,H1-5,H1-1
4_Member	GO Biological Processes	GO:0045910	negative regulation of DNA recombination	-6.27715	-4.07454	5/45	3006,3007,3008,3009,3024	H1-2,H1-3,H1-4,H1-5,H1-1
4_Member	GO Biological Processes	GO:0098532	histone H3-K27 trimethylation	-6.07923	-3.87973	3/6	3006,3007,3008	H1-2,H1-3,H1-4
4_Member	Reactome Gene Sets	R-HSA-75153	Apoptotic execution phase	-5.9578	-3.76446	5/52	3006,3007,3008,3009,3024	H1-2,H1-3,H1-4,H1-5,H1-1
4_Member	GO Biological Processes	GO:0070734	histone H3-K27 methylation	-5.45931	-3.27804	3/9	3006,3007,3008	H1-2,H1-3,H1-4
4_Member	GO Biological Processes	GO:0080182	histone H3-K4 trimethylation	-4.2105	-2.0524	3/22	3006,3007,3008	H1-2,H1-3,H1-4
4_Member	GO Biological Processes	GO:0051053	negative regulation of DNA metabolic process	-4.12366	-1.96837	5/123	3006,3007,3008,3009,3024	H1-2,H1-3,H1-4,H1-5,H1-1
4_Member	GO Biological Processes	GO:0000018	regulation of DNA recombination	-3.99425	-1.84175	5/131	3006,3007,3008,3009,3024	H1-2,H1-3,H1-4,H1-5,H1-1
4_Member	GO Biological Processes	GO:0018023	peptidyl-lysine trimethylation	-3.39131	-1.24708	3/41	3006,3007,3008	H1-2,H1-3,H1-4
4_Member	GO Biological Processes	GO:0051568	histone H3-K4 methylation	-3.39131	-1.24708	3/41	3006,3007,3008	H1-2,H1-3,H1-4
4_Member	Reactome Gene Sets	R-HSA-109581	Apoptosis	-3.35392	-1.21241	5/180	3006,3007,3008,3009,3024	H1-2,H1-3,H1-4,H1-5,H1-1
4_Member	Reactome Gene Sets	R-HSA-5357801	Programmed Cell Death	-3.05165	-0.918209	5/210	3006,3007,3008,3009,3024	H1-2,H1-3,H1-4,H1-5,H1-1
4_Member	GO Biological Processes	GO:0034968	histone lysine methylation	-2.66061	-0.550508	3/73	3006,3007,3008	H1-2,H1-3,H1-4
4_Member	GO Biological Processes	GO:0018022	peptidyl-lysine methylation	-2.41672	-0.323941	3/89	3006,3007,3008	H1-2,H1-3,H1-4
4_Member	GO Biological Processes	GO:0016571	histone methylation	-2.31212	-0.247523	3/97	3006,3007,3008	H1-2,H1-3,H1-4
5_Summary	Reactome Gene Sets	R-HSA-8866654	E3 ubiquitin ligases ubiquitinate target proteins	-5.68154	-3.49728	5/59	3017,8340,8345,8348,8970	H2BC5,H2BC13,H2BC9,H2BC17,H2BC11
5_Member	Reactome Gene Sets	R-HSA-8866654	E3 ubiquitin ligases ubiquitinate target proteins	-5.68154	-3.49728	5/59	3017,8340,8345,8348,8970	H2BC5,H2BC13,H2BC9,H2BC17,H2BC11
5_Member	Reactome Gene Sets	R-HSA-8852135	Protein ubiquitination	-5.05231	-2.87987	5/79	3017,8340,8345,8348,8970	H2BC5,H2BC13,H2BC9,H2BC17,H2BC11
6_Summary	GO Biological Processes	GO:0045860	positive regulation of protein kinase activity	-3.3162	-1.17739	7/393	920,4217,5649,7474,10125,57091,255324,1880,2149,7857,656,463,3485,1826,84695	CD4,MAP3K5,RELN,WNT5A,RASGRP1,CASS4,EPGN,GPR183,F2R,SCG2,BMP8B,ZFHX3,IGFBP2,DSCAM,LOXL3
6_Member	GO Biological Processes	GO:0045860	positive regulation of protein kinase activity	-3.3162	-1.17739	7/393	920,4217,5649,7474,10125,57091,255324	CD4,MAP3K5,RELN,WNT5A,RASGRP1,CASS4,EPGN
6_Member	GO Biological Processes	GO:0043406	positive regulation of MAP kinase activity	-3.12021	-0.984096	4/116	4217,7474,10125,255324	MAP3K5,WNT5A,RASGRP1,EPGN
6_Member	GO Biological Processes	GO:0061098	positive regulation of protein tyrosine kinase activity	-3.01565	-0.884867	3/55	5649,57091,255324	RELN,CASS4,EPGN
6_Member	GO Biological Processes	GO:0033674	positive regulation of kinase activity	-2.84777	-0.724858	7/473	920,4217,5649,7474,10125,57091,255324	CD4,MAP3K5,RELN,WNT5A,RASGRP1,CASS4,EPGN
6_Member	GO Biological Processes	GO:0043410	positive regulation of MAPK cascade	-2.76072	-0.645538	7/490	920,1880,2149,4217,7474,10125,255324	CD4,GPR183,F2R,MAP3K5,WNT5A,RASGRP1,EPGN
6_Member	GO Biological Processes	GO:0051057	positive regulation of small GTPase mediated signal transduction	-2.71276	-0.600131	3/70	2149,5649,10125	F2R,RELN,RASGRP1
6_Member	GO Biological Processes	GO:0051347	positive regulation of transferase activity	-2.44287	-0.347662	7/559	920,4217,5649,7474,10125,57091,255324	CD4,MAP3K5,RELN,WNT5A,RASGRP1,CASS4,EPGN
6_Member	GO Biological Processes	GO:0000165	MAPK cascade	-2.40598	-0.316383	4/182	4217,7474,7857,255324	MAP3K5,WNT5A,SCG2,EPGN
6_Member	GO Biological Processes	GO:0061097	regulation of protein tyrosine kinase activity	-2.40309	-0.316383	3/90	5649,57091,255324	RELN,CASS4,EPGN
6_Member	GO Biological Processes	GO:0001934	positive regulation of protein phosphorylation	-2.40194	-0.316383	8/722	656,920,4217,5649,7474,10125,57091,255324	BMP8B,CD4,MAP3K5,RELN,WNT5A,RASGRP1,CASS4,EPGN
6_Member	GO Biological Processes	GO:0043405	regulation of MAP kinase activity	-2.39754	-0.314364	4/183	4217,7474,10125,255324	MAP3K5,WNT5A,RASGRP1,EPGN
6_Member	GO Biological Processes	GO:0050731	positive regulation of peptidyl-tyrosine phosphorylation	-2.33988	-0.268414	4/190	920,5649,57091,255324	CD4,RELN,CASS4,EPGN
6_Member	GO Biological Processes	GO:0046330	positive regulation of JNK cascade	-2.33736	-0.268191	3/95	4217,7474,10125	MAP3K5,WNT5A,RASGRP1
6_Member	GO Biological Processes	GO:0045785	positive regulation of cell adhesion	-2.30617	-0.24384	6/446	463,920,3485,7474,10125,57091	ZFHX3,CD4,IGFBP2,WNT5A,RASGRP1,CASS4
6_Member	GO Biological Processes	GO:0030155	regulation of cell adhesion	-2.27001	-0.216638	8/760	463,920,1826,3485,7474,10125,57091,84695	ZFHX3,CD4,DSCAM,IGFBP2,WNT5A,RASGRP1,CASS4,LOXL3
6_Member	Reactome Gene Sets	R-HSA-8856825	Cargo recognition for clathrin-mediated endocytosis	-2.20522	-0.156254	3/106	920,7474,255324	CD4,WNT5A,EPGN
6_Member	GO Biological Processes	GO:0071902	positive regulation of protein serine/threonine kinase activity	-2.20221	-0.155431	4/208	4217,7474,10125,255324	MAP3K5,WNT5A,RASGRP1,EPGN
6_Member	GO Biological Processes	GO:0014066	regulation of phosphatidylinositol 3-kinase signaling	-2.15008	-0.107643	3/111	2149,5649,10125	F2R,RELN,RASGRP1
6_Member	GO Biological Processes	GO:0070374	positive regulation of ERK1 and ERK2 cascade	-2.1179	-0.0776209	4/220	920,1880,2149,10125	CD4,GPR183,F2R,RASGRP1
6_Member	GO Biological Processes	GO:0045859	regulation of protein kinase activity	-2.11127	-0.0731365	7/645	920,4217,5649,7474,10125,57091,255324	CD4,MAP3K5,RELN,WNT5A,RASGRP1,CASS4,EPGN
7_Summary	GO Biological Processes	GO:0043280	positive regulation of cysteine-type endopeptidase activity involved in apoptotic process	-2.99921	-0.87107	4/125	2149,4217,130399,414899	F2R,MAP3K5,ACVR1C,BLID
7_Member	GO Biological Processes	GO:0043280	positive regulation of cysteine-type endopeptidase activity involved in apoptotic process	-2.99921	-0.87107	4/125	2149,4217,130399,414899	F2R,MAP3K5,ACVR1C,BLID
7_Member	GO Biological Processes	GO:2001056	positive regulation of cysteine-type endopeptidase activity	-2.78374	-0.665996	4/143	2149,4217,130399,414899	F2R,MAP3K5,ACVR1C,BLID
7_Member	GO Biological Processes	GO:0010950	positive regulation of endopeptidase activity	-2.47549	-0.375377	4/174	2149,4217,130399,414899	F2R,MAP3K5,ACVR1C,BLID
7_Member	GO Biological Processes	GO:0010952	positive regulation of peptidase activity	-2.32386	-0.256984	4/192	2149,4217,130399,414899	F2R,MAP3K5,ACVR1C,BLID
7_Member	GO Biological Processes	GO:0043281	regulation of cysteine-type endopeptidase activity involved in apoptotic process	-2.23158	-0.180415	4/204	2149,4217,130399,414899	F2R,MAP3K5,ACVR1C,BLID
7_Member	GO Biological Processes	GO:2000116	regulation of cysteine-type endopeptidase activity	-2.05813	-0.024255	4/229	2149,4217,130399,414899	F2R,MAP3K5,ACVR1C,BLID
8_Summary	GO Biological Processes	GO:0050920	regulation of chemotaxis	-2.91839	-0.79287	5/225	1240,1826,1880,7474,7857,5649,26045,2149,57091	CMKLR1,DSCAM,GPR183,WNT5A,SCG2,RELN,LRRTM2,F2R,CASS4
8_Member	GO Biological Processes	GO:0050920	regulation of chemotaxis	-2.91839	-0.79287	5/225	1240,1826,1880,7474,7857	CMKLR1,DSCAM,GPR183,WNT5A,SCG2
8_Member	GO Biological Processes	GO:0050921	positive regulation of chemotaxis	-2.81749	-0.697167	4/140	1240,1826,7474,7857	CMKLR1,DSCAM,WNT5A,SCG2
8_Member	GO Biological Processes	GO:0099175	regulation of postsynapse organization	-2.48745	-0.382366	3/84	5649,7474,26045	RELN,WNT5A,LRRTM2
8_Member	GO Biological Processes	GO:0050808	synapse organization	-2.4791	-0.376514	5/284	1826,2149,5649,7474,26045	DSCAM,F2R,RELN,WNT5A,LRRTM2
8_Member	GO Biological Processes	GO:0040017	positive regulation of locomotion	-2.28084	-0.223011	7/599	1240,1826,2149,5649,7474,7857,57091	CMKLR1,DSCAM,F2R,RELN,WNT5A,SCG2,CASS4
8_Member	GO Biological Processes	GO:0006935	chemotaxis	-2.04817	-0.0164105	6/506	1240,1826,1880,5649,7474,7857	CMKLR1,DSCAM,GPR183,RELN,WNT5A,SCG2
8_Member	GO Biological Processes	GO:0042330	taxis	-2.03239	-0.00272866	6/510	1240,1826,1880,5649,7474,7857	CMKLR1,DSCAM,GPR183,RELN,WNT5A,SCG2
9_Summary	GO Biological Processes	GO:0030509	BMP signaling pathway	-2.56291	-0.455327	3/79	656,3096,10468,130399,920,57091,255324,463,7474	BMP8B,HIVEP1,FST,ACVR1C,CD4,CASS4,EPGN,ZFHX3,WNT5A
9_Member	GO Biological Processes	GO:0030509	BMP signaling pathway	-2.56291	-0.455327	3/79	656,3096,10468	BMP8B,HIVEP1,FST
9_Member	GO Biological Processes	GO:0007178	transmembrane receptor protein serine/threonine kinase signaling pathway	-2.37253	-0.291717	4/186	656,3096,10468,130399	BMP8B,HIVEP1,FST,ACVR1C
9_Member	GO Biological Processes	GO:0071772	response to BMP	-2.3502	-0.276409	3/94	656,3096,10468	BMP8B,HIVEP1,FST
9_Member	GO Biological Processes	GO:0071773	cellular response to BMP stimulus	-2.3502	-0.276409	3/94	656,3096,10468	BMP8B,HIVEP1,FST
9_Member	KEGG Pathway	hsa04350	TGF-beta signaling pathway	-2.3502	-0.276409	3/94	656,10468,130399	BMP8B,FST,ACVR1C
9_Member	GO Biological Processes	GO:0007167	enzyme linked receptor protein signaling pathway	-2.27311	-0.217516	7/601	656,920,3096,10468,57091,130399,255324	BMP8B,CD4,HIVEP1,FST,CASS4,ACVR1C,EPGN
9_Member	GO Biological Processes	GO:0070848	response to growth factor	-2.10062	-0.0646171	6/493	463,656,3096,7474,10468,130399	ZFHX3,BMP8B,HIVEP1,WNT5A,FST,ACVR1C
10_Summary	KEGG Pathway	hsa04260	Cardiac muscle contraction	-2.44448	-0.347662	3/87	781,7134,84679	CACNA2D1,TNNC1,SLC9A7
10_Member	KEGG Pathway	hsa04260	Cardiac muscle contraction	-2.44448	-0.347662	3/87	781,7134,84679	CACNA2D1,TNNC1,SLC9A7
11_Summary	GO Biological Processes	GO:0021510	spinal cord development	-2.28744	-0.227373	3/99	5649,57125,84695	RELN,PLXDC1,LOXL3
11_Member	GO Biological Processes	GO:0021510	spinal cord development	-2.28744	-0.227373	3/99	5649,57125,84695	RELN,PLXDC1,LOXL3
12_Summary	GO Biological Processes	GO:0008285	negative regulation of cell population proliferation	-2.19124	-0.146641	8/784	2149,3012,7474,7857,8334,8335,11095,130399	F2R,H2AC8,WNT5A,SCG2,H2AC6,H2AC4,ADAMTS8,ACVR1C
12_Member	GO Biological Processes	GO:0008285	negative regulation of cell population proliferation	-2.19124	-0.146641	8/784	2149,3012,7474,7857,8334,8335,11095,130399	F2R,H2AC8,WNT5A,SCG2,H2AC6,H2AC4,ADAMTS8,ACVR1C
