# Supplementary material for: Transcriptional profiling of Hutchinson-Gilford Progeria syndrome fibroblasts reveals deficits in mesenchymal stem cell commitment to differentiation related to early events in endochondral ossification
Source: eLife journal article supplement (doi:10.7554/elife.81290), 2022-12-29
Supplement: table2-data1 [file metascape_result.xlsx]

## Sheet: Annotation
MyList	Gene ID	Type	Tax ID	Homologene Gene ID	Homologene Gene Tax ID	Gene Symbol	Description	Biological Process (GO)	Kinase Class (UniProt)	Protein Function (Protein Atlas)	Subcellular Location (Protein Atlas)	Drug (DrugBank)	Canonical Pathways	Hallmark Gene Sets	R-HSA-1280215 Cytokine Signaling in Immune s	GO:0043065 positive regulation of apoptot	GO:0014850 response to muscle activity	hsa04750 Inflammatory mediator regulati	GO:1902532 negative regulation of intrace	R-HSA-9006931 Signaling by Nuclear Receptors	GO:0070482 response to oxygen levels	GO:0002698 negative regulation of immune	GO:0034097 response to cytokine	GO:0003002 regionalization	GO:0098609 cell-cell adhesion	GO:0031050 dsRNA processing	WP3995 Prion disease pathway	GO:0035987 endodermal cell differentiatio	WP3298 Melatonin metabolism and effec	GO:0006612 protein targeting to membrane	WP2064 Neural crest differentiation	M92 PID ANGIOPOIETIN RECEPTOR PATH	GO:0097435 supramolecular fiber organizat	R-HSA-112310 Neurotransmitter release cycle
SFRP2	6423	symbol	H. sapiens	6423	H. sapiens	SFRP2	secreted frizzled related protein 2	GO:0061185 negative regulation of dermatome development;GO:2000040 regulation of planar cell polarity pathway involved in axis elongation;GO:2000041 negative regulation of planar cell polarity pathway involved in axis elongation		Predicted secreted proteins	Intermediate filaments (Approved)		(M5883)NABA SECRETED FACTORS; (M5885)NABA MATRISOME ASSOCIATED; (M5889)NABA MATRISOME		0.0	1.0	0.0	0.0	1.0	0.0	0.0	0.0	0.0	1.0	0.0	0.0	0.0	0.0	0.0	0.0	0.0	0.0	1.0	0.0
SGCG	6445	symbol	H. sapiens	6445	H. sapiens	SGCG	sarcoglycan gamma	GO:0060047 heart contraction;GO:0003015 heart process;GO:0048738 cardiac muscle tissue development		Human disease related genes:Musculoskeletal diseases:Muscular diseases; Disease related genes				(M5909)HALLMARK MYOGENESIS; (M5930)HALLMARK EPITHELIAL MESENCHYMAL TRANSITION	0.0	0.0	0.0	0.0	0.0	0.0	0.0	0.0	0.0	0.0	0.0	0.0	0.0	1.0	0.0	0.0	0.0	0.0	0.0	0.0
PERM1	84808	symbol	H. sapiens	84808	H. sapiens	PERM1	PPARGC1 and ESRR induced regulator, muscle 1	GO:0014850 response to muscle activity;GO:0014823 response to activity;GO:0006355 regulation of transcription, DNA-templated		Predicted intracellular proteins					0.0	0.0	1.0	0.0	0.0	0.0	0.0	0.0	0.0	0.0	0.0	0.0	0.0	0.0	0.0	0.0	0.0	0.0	0.0	0.0
RAET1E	135250	symbol	H. sapiens	135250	H. sapiens	RAET1E	retinoic acid early transcript 1E	GO:0045954 positive regulation of natural killer cell mediated cytotoxicity;GO:0042267 natural killer cell mediated cytotoxicity;GO:0002717 positive regulation of natural killer cell mediated immunity		Predicted intracellular proteins	Focal adhesion sites (Supported); Additional: Cytosol				0.0	0.0	0.0	0.0	0.0	0.0	0.0	1.0	0.0	0.0	0.0	0.0	0.0	0.0	0.0	0.0	0.0	0.0	0.0	0.0
GPX7	2882	symbol	H. sapiens	2882	H. sapiens	GPX7	glutathione peroxidase 7	GO:0098869 cellular oxidant detoxification;GO:1990748 cellular detoxification;GO:0097237 cellular response to toxic substance		ENZYME proteins:Oxidoreductases; Predicted secreted proteins; Disease related genes; Potential drug targets; Enzymes		Glutathione		(M5930)HALLMARK EPITHELIAL MESENCHYMAL TRANSITION	0.0	0.0	0.0	0.0	0.0	0.0	0.0	0.0	0.0	0.0	0.0	0.0	0.0	0.0	0.0	0.0	0.0	0.0	0.0	0.0
LRRC6	23639	gene_synonym	H. sapiens	23639	H. sapiens	DNAAF11	dynein axonemal assembly factor 11	GO:0120229 protein localization to motile cilium;GO:0060287 epithelial cilium movement involved in determination of left/right asymmetry;GO:0090660 cerebrospinal fluid circulation		Predicted intracellular proteins; Human disease related genes:Respiratory diseases:Tracheobronchial diseases; Disease related genes					0.0	0.0	0.0	0.0	0.0	0.0	0.0	0.0	0.0	1.0	0.0	0.0	0.0	0.0	0.0	0.0	0.0	0.0	0.0	0.0
IL21-AS1	100996941	symbol	H. sapiens	100996941	H. sapiens	IL21-AS1	IL21 antisense RNA 1								0.0	0.0	0.0	0.0	0.0	0.0	0.0	0.0	0.0	0.0	0.0	0.0	0.0	0.0	0.0	0.0	0.0	0.0	0.0	0.0
GPRC5B	51704	symbol	H. sapiens	51704	H. sapiens	GPRC5B	G protein-coupled receptor class C group 5 member B	GO:0060907 positive regulation of macrophage cytokine production;GO:0010935 regulation of macrophage cytokine production;GO:0061081 positive regulation of myeloid leukocyte cytokine production involved in immune response		G-protein coupled receptors:GPCRs excl olfactory receptors; G-protein coupled receptors:Family 3 (C) receptors; Predicted intracellular proteins	Vesicles (Supported); Additional: Nucleoli;Nucleoplasm			(M5953)HALLMARK KRAS SIGNALING UP	0.0	0.0	0.0	0.0	0.0	0.0	0.0	1.0	0.0	0.0	0.0	0.0	0.0	0.0	0.0	0.0	0.0	0.0	0.0	0.0
PLEKHA7	144100	symbol	H. sapiens	144100	H. sapiens	PLEKHA7	pleckstrin homology domain containing A7	GO:0045218 zonula adherens maintenance;GO:0034334 adherens junction maintenance;GO:0044331 cell-cell adhesion mediated by cadherin		Predicted intracellular proteins	Cell Junctions;Nucleoplasm (Enhanced); Additional: Cytosol		(M232)PID ECADHERIN STABILIZATION PATHWAY		0.0	0.0	0.0	0.0	0.0	0.0	0.0	0.0	0.0	0.0	1.0	0.0	0.0	0.0	0.0	0.0	0.0	0.0	0.0	0.0
C10orf11	83938	gene_synonym	H. sapiens	83938	H. sapiens	LRMDA	leucine rich melanocyte differentiation associated	GO:0030318 melanocyte differentiation;GO:0050931 pigment cell differentiation;GO:0048066 developmental pigmentation		Human disease related genes:Congenital disorders of metabolism:Congenital disorders of amino acid metabolism; Predicted intracellular proteins; Disease related genes	Nucleoplasm (Supported); Additional: Cytosol				0.0	0.0	0.0	0.0	0.0	0.0	0.0	0.0	0.0	0.0	0.0	0.0	0.0	0.0	0.0	0.0	0.0	0.0	0.0	0.0
IQCK	124152	symbol	H. sapiens	124152	H. sapiens	IQCK	IQ motif containing K			Predicted intracellular proteins	Nuclear speckles (Approved); Additional: Cytosol				0.0	0.0	0.0	0.0	0.0	0.0	0.0	0.0	0.0	0.0	0.0	0.0	0.0	0.0	0.0	0.0	0.0	0.0	0.0	0.0
LINC00595	414243	symbol	H. sapiens	414243	H. sapiens	LINC00595	long intergenic non-protein coding RNA 595								0.0	0.0	0.0	0.0	0.0	0.0	0.0	0.0	0.0	0.0	0.0	0.0	0.0	0.0	0.0	0.0	0.0	0.0	0.0	0.0
NINJ2	4815	symbol	H. sapiens	4815	H. sapiens	NINJ2	ninjurin 2	GO:0007158 neuron cell-cell adhesion;GO:0042246 tissue regeneration;GO:0031099 regeneration			Endoplasmic reticulum (Approved); Additional: Centriolar satellite;Cytosol;Nucleoplasm;Plasma membrane				0.0	0.0	1.0	0.0	0.0	0.0	0.0	0.0	0.0	0.0	1.0	0.0	0.0	0.0	0.0	0.0	0.0	0.0	0.0	0.0
CASP10	843	symbol	H. sapiens	843	H. sapiens	CASP10	caspase 10	GO:0097194 execution phase of apoptosis;GO:0006919 activation of cysteine-type endopeptidase activity involved in apoptotic process;GO:0043280 positive regulation of cysteine-type endopeptidase activity involved in apoptotic process		Human disease related genes:Immune system diseases:Primary immunodeficiency; Cancer-related genes:Candidate cancer biomarkers; ENZYME proteins:Hydrolases; Peptidases:Cysteine-type peptidases; Disease related genes; Potential drug targets; Enzymes; Predicted intracellular proteins	Golgi apparatus (Approved); Additional: Vesicles		(M7997)SA CASPASE CASCADE; (M79)PID TRAIL PATHWAY; (M94)PID FAS PATHWAY	(M5921)HALLMARK COMPLEMENT	0.0	0.0	0.0	0.0	0.0	0.0	0.0	0.0	0.0	0.0	0.0	0.0	0.0	0.0	0.0	0.0	0.0	0.0	0.0	0.0
MIR497HG	100506755	symbol	H. sapiens	100506755	H. sapiens	MIR497HG	mir-497-195 cluster host gene								0.0	0.0	0.0	0.0	0.0	0.0	0.0	0.0	0.0	0.0	0.0	0.0	0.0	0.0	0.0	0.0	0.0	0.0	0.0	0.0
ZDHHC6	64429	symbol	H. sapiens	64429	H. sapiens	ZDHHC6	zinc finger DHHC-type palmitoyltransferase 6	GO:0140438 protein stearoylation;GO:0010636 positive regulation of mitochondrial fusion;GO:0010635 regulation of mitochondrial fusion		Enzymes; ENZYME proteins:Transferases					0.0	0.0	0.0	0.0	0.0	0.0	0.0	0.0	0.0	0.0	0.0	0.0	0.0	0.0	0.0	1.0	0.0	0.0	0.0	0.0
LINC01436	100996609	symbol	H. sapiens	100996609	H. sapiens	LINC01436	long intergenic non-protein coding RNA 1436								0.0	0.0	0.0	0.0	0.0	0.0	0.0	0.0	0.0	0.0	0.0	0.0	0.0	0.0	0.0	0.0	0.0	0.0	0.0	0.0
BCL6B	255877	symbol	H. sapiens	255877	H. sapiens	BCL6B	BCL6B transcription repressor	GO:0042092 type 2 immune response;GO:0050727 regulation of inflammatory response;GO:0031347 regulation of defense response		Predicted intracellular proteins; Transcription factors:Zinc-coordinating DNA-binding domains	Nucleoplasm (Approved); Additional: Plasma membrane;Vesicles				0.0	0.0	0.0	0.0	0.0	0.0	0.0	0.0	0.0	0.0	0.0	0.0	0.0	0.0	0.0	0.0	0.0	0.0	0.0	0.0
NOTCH4	4855	symbol	H. sapiens	4855	H. sapiens	NOTCH4	notch receptor 4	GO:0007221 positive regulation of transcription of Notch receptor target;GO:2000048 negative regulation of cell-cell adhesion mediated by cadherin;GO:0001886 endothelial cell morphogenesis		Human disease related genes:Cancers:Cancers of the breast and female genital organs			(M17)PID NOTCH PATHWAY	(M5895)HALLMARK WNT BETA CATENIN SIGNALING; (M5921)HALLMARK COMPLEMENT	0.0	0.0	0.0	0.0	0.0	0.0	0.0	0.0	0.0	0.0	0.0	0.0	0.0	0.0	0.0	0.0	1.0	1.0	0.0	0.0
RPGRIP1L	23322	symbol	H. sapiens	23322	H. sapiens	RPGRIP1L	RPGRIP1 like	GO:0046548 retinal rod cell development;GO:0060221 retinal rod cell differentiation;GO:0021670 lateral ventricle development		Human disease related genes:Congenital malformations:Congenital malformations of the nervous system; Predicted intracellular proteins; Disease related genes; Human disease related genes:Congenital malformations:Congenital malformations of the urinary system	Cytosol;Plasma membrane (Approved)				0.0	0.0	0.0	0.0	0.0	0.0	0.0	0.0	0.0	1.0	0.0	0.0	0.0	0.0	0.0	0.0	0.0	0.0	0.0	0.0
IRAK3	11213	symbol	H. sapiens	11213	H. sapiens	IRAK3	interleukin 1 receptor associated kinase 3	GO:0010932 regulation of macrophage tolerance induction;GO:0010933 positive regulation of macrophage tolerance induction;GO:0010936 negative regulation of macrophage cytokine production	TKL Ser/Thr protein kinase family	Kinases:TKL Ser/Thr protein kinases; Disease related genes; Potential drug targets; Enzymes; Predicted intracellular proteins; ENZYME proteins:Transferases	Vesicles (Approved)	Fostamatinib	(M110)PID IL1 PATHWAY		1.0	0.0	0.0	0.0	1.0	0.0	0.0	1.0	1.0	0.0	0.0	0.0	0.0	0.0	0.0	0.0	0.0	0.0	0.0	0.0
TMEM50A	23585	symbol	H. sapiens	23585	H. sapiens	TMEM50A	transmembrane protein 50A	GO:0032511 late endosome to vacuole transport via multivesicular body sorting pathway;GO:0045324 late endosome to vacuole transport;GO:0032509 endosome transport via multivesicular body sorting pathway		Transporters	Plasma membrane (Approved); Additional: Actin filaments;Cytosol			(M5908)HALLMARK ANDROGEN RESPONSE	0.0	0.0	0.0	0.0	0.0	0.0	0.0	0.0	0.0	0.0	0.0	0.0	0.0	0.0	0.0	0.0	0.0	0.0	0.0	0.0
CASC2	255082	symbol	H. sapiens	255082	H. sapiens	CASC2	cancer susceptibility 2	GO:0002357 defense response to tumor cell;GO:0002347 response to tumor cell;GO:0043280 positive regulation of cysteine-type endopeptidase activity involved in apoptotic process							0.0	0.0	0.0	0.0	1.0	0.0	0.0	0.0	0.0	0.0	0.0	0.0	0.0	0.0	0.0	0.0	0.0	0.0	0.0	0.0
ABI1	10006	symbol	H. sapiens	10006	H. sapiens	ABI1	abl interactor 1	GO:0072673 lamellipodium morphogenesis;GO:0035855 megakaryocyte development;GO:0030219 megakaryocyte differentiation		Predicted intracellular proteins; Cancer-related genes; Disease related genes	Cell Junctions;Plasma membrane (Approved)		(M277)PID INTEGRIN A4B1 PATHWAY; (M241)PID RAC1 REG PATHWAY; (M156)PID ECADHERIN NASCENT AJ PATHWAY	(M5893)HALLMARK MITOTIC SPINDLE; (M5932)HALLMARK INFLAMMATORY RESPONSE; (M5950)HALLMARK ALLOGRAFT REJECTION	0.0	0.0	0.0	0.0	0.0	0.0	0.0	0.0	0.0	1.0	0.0	0.0	0.0	0.0	1.0	0.0	0.0	0.0	1.0	0.0
PREX2	80243	symbol	H. sapiens	80243	H. sapiens	PREX2	phosphatidylinositol-3,4,5-trisphosphate dependent Rac exchange factor 2	GO:0014065 phosphatidylinositol 3-kinase signaling;GO:0048813 dendrite morphogenesis;GO:0048015 phosphatidylinositol-mediated signaling		Predicted intracellular proteins; Cancer-related genes	Endoplasmic reticulum (Approved)		(M241)PID RAC1 REG PATHWAY		0.0	0.0	0.0	0.0	0.0	0.0	0.0	0.0	0.0	0.0	0.0	0.0	0.0	0.0	1.0	0.0	0.0	0.0	0.0	0.0
PARP3	10039	symbol	H. sapiens	10039	H. sapiens	PARP3	poly(ADP-ribose) polymerase family member 3	GO:1905662 negative regulation of telomerase RNA reverse transcriptase activity;GO:0030592 DNA ADP-ribosylation;GO:1905661 regulation of telomerase RNA reverse transcriptase activity		FDA approved drug targets:Small molecule drugs; Predicted intracellular proteins	Nuclear bodies;Nucleoplasm (Supported)	2-methyl-3,5,7,8-tetrahydro-4H-thiopyrano[4,3-d]pyrimidin-4-one; 4-[3-(1,4-diazepan-1-ylcarbonyl)-4-fluorobenzyl]phthalazin-1(2H)-one; N~2~,N~2~-DIMETHYL-N~1~-(6-OXO-5,6-DIHYDROPHENANTHRIDIN-2-YL)GLYCINAMIDE; Olaparib; Rucaparib			0.0	0.0	0.0	0.0	0.0	0.0	0.0	1.0	0.0	0.0	0.0	0.0	0.0	0.0	0.0	0.0	0.0	0.0	0.0	0.0
TRIM9	114088	symbol	H. sapiens	114088	H. sapiens	TRIM9	tripartite motif containing 9	GO:0043161 proteasome-mediated ubiquitin-dependent protein catabolic process;GO:0010498 proteasomal protein catabolic process;GO:0006511 ubiquitin-dependent protein catabolic process		Enzymes; Predicted intracellular proteins; ENZYME proteins:Transferases					0.0	0.0	0.0	0.0	0.0	0.0	0.0	0.0	0.0	0.0	0.0	0.0	0.0	0.0	0.0	0.0	0.0	0.0	0.0	0.0
CACNA2D4	93589	symbol	H. sapiens	93589	H. sapiens	CACNA2D4	calcium voltage-gated channel auxiliary subunit alpha2delta 4	GO:0050908 detection of light stimulus involved in visual perception;GO:0050962 detection of light stimulus involved in sensory perception;GO:0009584 detection of visible light		FDA approved drug targets:Small molecule drugs; Transporters:Accessory Factors Involved in Transport; Human disease related genes:Nervous system diseases:Eye disease; Disease related genes; Predicted intracellular proteins					0.0	0.0	0.0	0.0	0.0	0.0	0.0	0.0	0.0	0.0	0.0	0.0	0.0	1.0	0.0	0.0	0.0	0.0	0.0	0.0
ABCB4	5244	symbol	H. sapiens	5244	H. sapiens	ABCB4	ATP binding cassette subfamily B member 4	GO:1901557 response to fenofibrate;GO:0061092 positive regulation of phospholipid translocation;GO:1903412 response to bile acid		Human disease related genes:Digestive system diseases:Liver diseases; ENZYME proteins; Disease related genes; Potential drug targets; Enzymes; Transporters:Primary Active Transporters; Predicted intracellular proteins	Actin filaments;Nucleoplasm;Plasma membrane (Approved); Additional: Focal adhesion sites			(M5949)HALLMARK PEROXISOME	0.0	0.0	0.0	0.0	0.0	0.0	0.0	0.0	0.0	0.0	0.0	0.0	0.0	0.0	0.0	0.0	0.0	0.0	0.0	0.0
PLEKHN1	84069	symbol	H. sapiens	84069	H. sapiens	PLEKHN1	pleckstrin homology domain containing N1	GO:0061158 3'-UTR-mediated mRNA destabilization;GO:0061157 mRNA destabilization;GO:0050779 RNA destabilization		Predicted intracellular proteins	Nuclear speckles (Approved)				0.0	1.0	0.0	0.0	0.0	0.0	1.0	0.0	0.0	0.0	0.0	0.0	0.0	0.0	0.0	0.0	0.0	0.0	0.0	0.0
CLDN7	1366	symbol	H. sapiens	1366	H. sapiens	CLDN7	claudin 7	GO:0016338 calcium-independent cell-cell adhesion via plasma membrane cell-adhesion molecules;GO:0070830 bicellular tight junction assembly;GO:0120192 tight junction assembly		Transporters:Transporter channels and pores; Predicted intracellular proteins; Cancer-related genes:Candidate cancer biomarkers	Vesicles (Approved); Additional: Cell Junctions			(M5906)HALLMARK ESTROGEN RESPONSE EARLY; (M5915)HALLMARK APICAL JUNCTION	0.0	0.0	0.0	0.0	0.0	0.0	0.0	0.0	0.0	0.0	1.0	0.0	0.0	0.0	0.0	0.0	0.0	0.0	0.0	0.0
SERPING1	710	symbol	H. sapiens	710	H. sapiens	SERPING1	serpin family G member 1	GO:0001868 regulation of complement activation, lectin pathway;GO:0001869 negative regulation of complement activation, lectin pathway;GO:0045916 negative regulation of complement activation		Human disease related genes:Cardiovascular diseases:Vascular diseases; Human disease related genes:Immune system diseases:Primary immunodeficiency; Candidate cardiovascular disease genes; Predicted secreted proteins; Disease related genes; Predicted intracellular proteins		PPL-100; Copper	(M3468)NABA ECM REGULATORS; (M5885)NABA MATRISOME ASSOCIATED; (M5889)NABA MATRISOME	(M5946)HALLMARK COAGULATION; (M5913)HALLMARK INTERFERON GAMMA RESPONSE; (M5921)HALLMARK COMPLEMENT	0.0	0.0	0.0	0.0	0.0	0.0	0.0	1.0	0.0	0.0	0.0	0.0	0.0	0.0	0.0	0.0	0.0	0.0	0.0	0.0
TRPV3	162514	symbol	H. sapiens	162514	H. sapiens	TRPV3	transient receptor potential cation channel subfamily V member 3	GO:0042636 negative regulation of hair cycle;GO:0098703 calcium ion import across plasma membrane;GO:1902656 calcium ion import into cytosol		Human disease related genes:Congenital malformations:Congenital malformations of skin; FDA approved drug targets:Small molecule drugs; Disease related genes; Transporters:Transporter channels and pores	Plasma membrane (Approved); Additional: Centrosome;Cytosol	Levomenthol; Camphor; Cannabidiol; Eugenol; (S)-camphor; Medical Cannabis; Nabiximols			0.0	0.0	0.0	1.0	0.0	0.0	0.0	0.0	0.0	0.0	0.0	0.0	0.0	0.0	0.0	0.0	0.0	0.0	0.0	0.0
CD58	965	symbol	H. sapiens	965	H. sapiens	CD58	CD58 molecule	GO:0034113 heterotypic cell-cell adhesion;GO:0032757 positive regulation of interleukin-8 production;GO:0071346 cellular response to interferon-gamma		Human disease related genes:Cancers:Cancers of haematopoietic and lymphoid tissues; CD markers					0.0	0.0	0.0	0.0	0.0	0.0	0.0	0.0	1.0	0.0	1.0	0.0	0.0	0.0	0.0	0.0	0.0	0.0	0.0	0.0
SLC22A15	55356	symbol	H. sapiens	55356	H. sapiens	SLC22A15	solute carrier family 22 member 15	GO:0055085 transmembrane transport;GO:0006811 ion transport;GO:0006810 transport		Transporters:Electrochemical Potential-driven transporters					0.0	0.0	0.0	0.0	0.0	0.0	0.0	0.0	0.0	0.0	0.0	0.0	0.0	0.0	0.0	0.0	0.0	0.0	0.0	0.0
HENMT1	113802	symbol	H. sapiens	113802	H. sapiens	HENMT1	HEN methyltransferase 1	GO:0030422 production of siRNA involved in RNA interference;GO:0016246 RNA interference;GO:0034587 piRNA metabolic process		Enzymes; Predicted intracellular proteins; ENZYME proteins:Transferases	Focal adhesion sites;Plasma membrane (Approved)				0.0	0.0	0.0	0.0	0.0	0.0	0.0	0.0	0.0	0.0	0.0	1.0	0.0	0.0	0.0	0.0	0.0	0.0	0.0	0.0
FNDC1	84624	symbol	H. sapiens	84624	H. sapiens	FNDC1	fibronectin type III domain containing 1			Predicted secreted proteins; Predicted intracellular proteins	Nuclear speckles (Approved)		(M3008)NABA ECM GLYCOPROTEINS; (M5884)NABA CORE MATRISOME; (M5889)NABA MATRISOME		0.0	0.0	0.0	0.0	0.0	0.0	0.0	0.0	0.0	0.0	0.0	0.0	0.0	0.0	0.0	0.0	0.0	0.0	0.0	0.0
LOC100049716	100049716	Gene_ID	H. sapiens	100049716	H. sapiens	NINJ2-AS1	NINJ2 antisense RNA 1								0.0	0.0	0.0	0.0	0.0	0.0	0.0	0.0	0.0	0.0	0.0	0.0	0.0	0.0	0.0	0.0	0.0	0.0	0.0	0.0
TNFAIP2	7127	symbol	H. sapiens	7127	H. sapiens	TNFAIP2	TNF alpha induced protein 2	GO:0051601 exocyst localization;GO:0031503 protein-containing complex localization;GO:0006887 exocytosis		Transporters:Transporter channels and pores; Predicted intracellular proteins; Cancer-related genes:Candidate cancer biomarkers	Cytosol;Golgi apparatus (Approved); Additional: Nuclear membrane;Nucleoplasm			(M5890)HALLMARK TNFA SIGNALING VIA NFKB; (M5913)HALLMARK INTERFERON GAMMA RESPONSE	0.0	0.0	0.0	0.0	0.0	0.0	0.0	0.0	0.0	0.0	0.0	0.0	0.0	0.0	0.0	0.0	0.0	0.0	0.0	0.0
HERC3	8916	symbol	H. sapiens	8916	H. sapiens	HERC3	HECT and RLD domain containing E3 ubiquitin protein ligase 3	GO:0016567 protein ubiquitination;GO:0032446 protein modification by small protein conjugation;GO:0070647 protein modification by small protein conjugation or removal		Enzymes; Predicted intracellular proteins; ENZYME proteins:Transferases	Cytosol (Supported, Approved)			(M5908)HALLMARK ANDROGEN RESPONSE	0.0	0.0	0.0	0.0	0.0	0.0	0.0	0.0	0.0	0.0	0.0	0.0	0.0	0.0	0.0	0.0	0.0	0.0	0.0	0.0
10-Sep						None	None	None	None	None	None	None	None	None	nan	nan	nan	nan	nan	nan	nan	nan	nan	nan	nan	nan	nan	nan	nan	nan	nan	nan	nan	nan
DCHS2	54798	symbol	H. sapiens	54798	H. sapiens	DCHS2	dachsous cadherin-related 2	GO:0072137 condensed mesenchymal cell proliferation;GO:0010463 mesenchymal cell proliferation;GO:0072006 nephron development			Plasma membrane;Vesicles (Approved)				0.0	0.0	0.0	0.0	0.0	0.0	0.0	0.0	0.0	0.0	1.0	0.0	0.0	0.0	0.0	0.0	0.0	0.0	0.0	0.0
GANC	2595	symbol	H. sapiens	2595	H. sapiens	GANC	glucosidase alpha, neutral C	GO:0000023 maltose metabolic process;GO:0005984 disaccharide metabolic process;GO:0006491 N-glycan processing		Enzymes; ENZYME proteins:Hydrolases; FDA approved drug targets:Small molecule drugs; Predicted intracellular proteins	Cytosol (Approved)	Miglitol			0.0	0.0	0.0	0.0	0.0	0.0	0.0	0.0	0.0	0.0	0.0	0.0	0.0	0.0	0.0	0.0	0.0	0.0	0.0	0.0
C2	717	symbol	H. sapiens	717	H. sapiens	C2	complement C2	GO:2000427 positive regulation of apoptotic cell clearance;GO:2000425 regulation of apoptotic cell clearance;GO:0097066 response to thyroid hormone		Human disease related genes:Immune system diseases:Primary immunodeficiency; Human disease related genes:Immune system diseases:Allergies and autoimmune diseases; ENZYME proteins:Hydrolases; Predicted secreted proteins; Human disease related genes:Nervous system diseases:Eye disease; Disease related genes; Potential drug targets; Enzymes; Predicted intracellular proteins; Peptidases:Serine-type p…				(M5946)HALLMARK COAGULATION; (M5921)HALLMARK COMPLEMENT; (M5950)HALLMARK ALLOGRAFT REJECTION	0.0	0.0	0.0	0.0	0.0	0.0	0.0	0.0	0.0	0.0	0.0	0.0	0.0	0.0	0.0	0.0	0.0	0.0	0.0	0.0
SNX21	90203	symbol	H. sapiens	90203	H. sapiens	SNX21	sorting nexin family member 21	GO:0015031 protein transport;GO:0045184 establishment of protein localization;GO:0071705 nitrogen compound transport		Predicted intracellular proteins	Centriolar satellite;Vesicles (Approved)				0.0	0.0	0.0	0.0	0.0	0.0	0.0	0.0	0.0	0.0	0.0	0.0	0.0	0.0	0.0	0.0	0.0	0.0	0.0	0.0
WISP2	8839	gene_synonym	H. sapiens	8839	H. sapiens	CCN5	cellular communication network factor 5	GO:0007155 cell adhesion;GO:0022610 biological adhesion;GO:0007267 cell-cell signaling		Predicted secreted proteins			(M3008)NABA ECM GLYCOPROTEINS; (M5884)NABA CORE MATRISOME; (M5889)NABA MATRISOME	(M5891)HALLMARK HYPOXIA; (M5906)HALLMARK ESTROGEN RESPONSE EARLY; (M5907)HALLMARK ESTROGEN RESPONSE LATE	0.0	0.0	0.0	0.0	0.0	0.0	0.0	0.0	0.0	0.0	0.0	0.0	0.0	0.0	0.0	0.0	0.0	0.0	0.0	0.0
C3orf67	200844	gene_synonym	H. sapiens	200844	H. sapiens	CFAP20DC	CFAP20 domain containing			Predicted intracellular proteins	Golgi apparatus (Approved)				0.0	0.0	0.0	0.0	0.0	0.0	0.0	0.0	0.0	0.0	0.0	0.0	0.0	0.0	0.0	0.0	0.0	0.0	0.0	0.0
OAS2	4939	symbol	H. sapiens	4939	H. sapiens	OAS2	2'-5'-oligoadenylate synthetase 2	GO:1903487 regulation of lactation;GO:0070106 interleukin-27-mediated signaling pathway;GO:0060700 regulation of ribonuclease activity		Enzymes; Predicted intracellular proteins; ENZYME proteins:Transferases	Centrosome (Approved)			(M5913)HALLMARK INTERFERON GAMMA RESPONSE	1.0	0.0	0.0	0.0	0.0	0.0	0.0	0.0	1.0	0.0	0.0	0.0	0.0	0.0	1.0	0.0	0.0	0.0	0.0	0.0
CAPN3	825	symbol	H. sapiens	825	H. sapiens	CAPN3	calpain 3	GO:1990092 calcium-dependent self proteolysis;GO:0014718 positive regulation of satellite cell activation involved in skeletal muscle regeneration;GO:0014717 regulation of satellite cell activation involved in skeletal muscle regeneration		ENZYME proteins:Hydrolases; Human disease related genes:Musculoskeletal diseases:Muscular diseases; Peptidases:Cysteine-type peptidases; Disease related genes; Potential drug targets; Enzymes; Predicted intracellular proteins		L-aminocarnityl-succinyl-leucyl-argininal-diethylacetal		(M5947)HALLMARK IL2 STAT5 SIGNALING	0.0	0.0	1.0	0.0	0.0	0.0	0.0	0.0	0.0	0.0	0.0	0.0	0.0	0.0	0.0	0.0	0.0	0.0	1.0	0.0
ETS1	2113	symbol	H. sapiens	2113	H. sapiens	ETS1	ETS proto-oncogene 1, transcription factor	GO:0030578 PML body organization;GO:0030575 nuclear body organization;GO:1904996 positive regulation of leukocyte adhesion to vascular endothelial cell		Transcription factors:Helix-turn-helix domains; RAS pathway related proteins; Predicted intracellular proteins	Nucleoplasm (Enhanced)		(M44)PID HIF2PATHWAY; (M92)PID ANGIOPOIETIN RECEPTOR PATHWAY; (M281)PID FAK PATHWAY	(M5891)HALLMARK HYPOXIA; (M5950)HALLMARK ALLOGRAFT REJECTION; (M5953)HALLMARK KRAS SIGNALING UP	0.0	0.0	0.0	0.0	0.0	0.0	1.0	0.0	0.0	0.0	0.0	0.0	0.0	0.0	1.0	0.0	1.0	1.0	0.0	0.0
TMEM18	129787	symbol	H. sapiens	129787	H. sapiens	TMEM18	transmembrane protein 18	GO:0016477 cell migration;GO:0048870 cell motility;GO:0051674 localization of cell		Transporters	Mitochondria (Approved); Additional: Endoplasmic reticulum				0.0	0.0	0.0	0.0	0.0	0.0	0.0	0.0	0.0	0.0	0.0	0.0	0.0	0.0	0.0	0.0	0.0	0.0	0.0	0.0
HSPB2	3316	symbol	H. sapiens	3316	H. sapiens	HSPB2	heat shock protein family B (small) member 2	GO:0006986 response to unfolded protein;GO:0035966 response to topologically incorrect protein;GO:0050790 regulation of catalytic activity		Predicted intracellular proteins				(M5909)HALLMARK MYOGENESIS	1.0	0.0	0.0	0.0	0.0	0.0	0.0	0.0	0.0	0.0	0.0	0.0	0.0	0.0	0.0	0.0	0.0	0.0	0.0	0.0
ZNF137P	7696	symbol	H. sapiens	7696	H. sapiens	ZNF137P	zinc finger protein 137, pseudogene								0.0	0.0	0.0	0.0	0.0	0.0	0.0	0.0	0.0	0.0	0.0	0.0	0.0	0.0	0.0	0.0	0.0	0.0	0.0	0.0
SH3KBP1	30011	symbol	H. sapiens	30011	H. sapiens	SH3KBP1	SH3 domain containing kinase binding protein 1	GO:0008360 regulation of cell shape;GO:0050871 positive regulation of B cell activation;GO:0050864 regulation of B cell activation		Predicted intracellular proteins; Disease related genes	Cytosol (Supported)		(M214)PID ERBB1 INTERNALIZATION PATHWAY; (M48)PID MET PATHWAY		0.0	0.0	0.0	0.0	0.0	0.0	0.0	0.0	0.0	0.0	0.0	0.0	0.0	0.0	1.0	0.0	1.0	0.0	1.0	0.0
USP43	124739	symbol	H. sapiens	124739	H. sapiens	USP43	ubiquitin specific peptidase 43	GO:0019985 translesion synthesis;GO:0006301 postreplication repair;GO:0000731 DNA synthesis involved in DNA repair		Enzymes; ENZYME proteins:Hydrolases; Predicted intracellular proteins; Peptidases:Cysteine-type peptidases	Nuclear speckles;Nucleoplasm (Approved)				0.0	0.0	0.0	0.0	0.0	0.0	0.0	0.0	0.0	0.0	0.0	0.0	0.0	0.0	0.0	0.0	0.0	0.0	0.0	0.0
MX2	4600	symbol	H. sapiens	4600	H. sapiens	MX2	MX dynamin like GTPase 2	GO:0035455 response to interferon-alpha;GO:0046822 regulation of nucleocytoplasmic transport;GO:0051028 mRNA transport		Transporters:Transporter channels and pores; Predicted intracellular proteins				(M5913)HALLMARK INTERFERON GAMMA RESPONSE	1.0	0.0	0.0	0.0	0.0	0.0	0.0	0.0	1.0	0.0	0.0	0.0	0.0	0.0	0.0	0.0	0.0	0.0	0.0	0.0
GLTSCR1L	23506	gene_synonym	H. sapiens	23506	H. sapiens	BICRAL	BICRA like chromatin remodeling complex associated protein	GO:0045893 positive regulation of transcription, DNA-templated;GO:1903508 positive regulation of nucleic acid-templated transcription;GO:1902680 positive regulation of RNA biosynthetic process		Predicted intracellular proteins	Nucleoplasm (Supported)				0.0	0.0	0.0	0.0	0.0	0.0	0.0	0.0	0.0	0.0	0.0	0.0	0.0	0.0	0.0	0.0	0.0	0.0	0.0	0.0
KLF11	8462	symbol	H. sapiens	8462	H. sapiens	KLF11	Kruppel like factor 11	GO:0000083 regulation of transcription involved in G1/S transition of mitotic cell cycle;GO:0000082 G1/S transition of mitotic cell cycle;GO:0044843 cell cycle G1/S phase transition		Transcription factors:Zinc-coordinating DNA-binding domains; Human disease related genes:Endocrine and metabolic diseases:Diabetes; Predicted intracellular proteins; Disease related genes	Nucleoplasm (Supported); Additional: Cytosol;Focal adhesion sites;Nuclear bodies				0.0	1.0	0.0	0.0	0.0	0.0	0.0	0.0	0.0	0.0	0.0	0.0	0.0	0.0	1.0	0.0	0.0	0.0	0.0	0.0
ITGA4	3676	symbol	H. sapiens	3676	H. sapiens	ITGA4	integrin subunit alpha 4	GO:0043496 regulation of protein homodimerization activity;GO:0090074 negative regulation of protein homodimerization activity;GO:1990771 clathrin-dependent extracellular exosome endocytosis		FDA approved drug targets:Biotech drugs; Predicted intracellular proteins; CD markers; Cancer-related genes:Candidate cancer biomarkers	Plasma membrane (Approved)	Natalizumab; ATL1102; CDP323; R1295; R411; Tinzaparin; Vedolizumab	(M212)PID INTEGRIN5 PATHWAY; (M274)PID LYMPH ANGIOGENESIS PATHWAY; (M47)PID INTEGRIN CS PATHWAY	(M5897)HALLMARK IL6 JAK STAT3 SIGNALING	0.0	1.0	0.0	0.0	0.0	0.0	0.0	0.0	1.0	0.0	1.0	0.0	0.0	1.0	0.0	0.0	0.0	0.0	0.0	0.0
FXYD5	53827	symbol	H. sapiens	53827	H. sapiens	FXYD5	FXYD domain containing ion transport regulator 5	GO:0046588 negative regulation of calcium-dependent cell-cell adhesion;GO:0046586 regulation of calcium-dependent cell-cell adhesion;GO:0030033 microvillus assembly		Transporters:Transporter channels and pores	Endoplasmic reticulum (Approved)				0.0	0.0	0.0	0.0	0.0	0.0	0.0	0.0	0.0	0.0	0.0	0.0	0.0	0.0	0.0	0.0	0.0	0.0	0.0	0.0
EPOR	2057	symbol	H. sapiens	2057	H. sapiens	EPOR	erythropoietin receptor	GO:0038162 erythropoietin-mediated signaling pathway;GO:0036018 cellular response to erythropoietin;GO:0036017 response to erythropoietin		Human disease related genes:Cardiovascular diseases:Hematologic diseases; FDA approved drug targets:Biotech drugs; Disease related genes; Cancer-related genes:Candidate cancer biomarkers	Plasma membrane (Supported); Additional: Nuclear speckles	Darbepoetin alfa; Erythropoietin; Dibromotyrosine; Peginesatide; Methoxy polyethylene glycol-epoetin beta	(M233)PID EPO PATHWAY; (M231)PID KIT PATHWAY	(M5945)HALLMARK HEME METABOLISM	0.0	0.0	0.0	0.0	0.0	0.0	0.0	0.0	1.0	0.0	0.0	0.0	0.0	0.0	0.0	0.0	0.0	1.0	0.0	0.0
C3orf80	401097	symbol	H. sapiens	401097	H. sapiens	C3orf80	chromosome 3 open reading frame 80								0.0	0.0	0.0	0.0	0.0	0.0	0.0	0.0	0.0	0.0	0.0	0.0	0.0	0.0	0.0	0.0	0.0	0.0	0.0	0.0
CYB5A	1528	symbol	H. sapiens	1528	H. sapiens	CYB5A	cytochrome b5 type A	GO:1902600 proton transmembrane transport;GO:0022900 electron transport chain;GO:0006091 generation of precursor metabolites and energy		Human disease related genes:Cardiovascular diseases:Hematologic diseases; Predicted intracellular proteins; Disease related genes	Cytosol;Vesicles (Enhanced)	Dimethyl Propionate Ester Heme; Chromium; Chromic citrate; Chromic nitrate; Chromium gluconate; Chromium nicotinate; Chromous sulfate		(M5934)HALLMARK XENOBIOTIC METABOLISM; (M5936)HALLMARK OXIDATIVE PHOSPHORYLATION; (M5937)HALLMARK GLYCOLYSIS	0.0	0.0	0.0	0.0	0.0	0.0	0.0	0.0	0.0	0.0	0.0	0.0	0.0	0.0	0.0	0.0	0.0	0.0	0.0	0.0
PPP1R21	129285	symbol	H. sapiens	129285	H. sapiens	PPP1R21	protein phosphatase 1 regulatory subunit 21			Predicted intracellular proteins; Disease related genes	Vesicles (Approved); Additional: Nucleoplasm				0.0	0.0	0.0	0.0	0.0	0.0	0.0	0.0	0.0	0.0	0.0	0.0	0.0	0.0	0.0	0.0	0.0	0.0	0.0	0.0
EMX2	2018	symbol	H. sapiens	2018	H. sapiens	EMX2	empty spiracles homeobox 2	GO:0072197 ureter morphogenesis;GO:0021796 cerebral cortex regionalization;GO:0021978 telencephalon regionalization		Transcription factors:Helix-turn-helix domains; Human disease related genes:Congenital malformations:Congenital malformations of the nervous system; Predicted intracellular proteins; Disease related genes	Nucleoplasm (Approved)				0.0	0.0	0.0	0.0	0.0	0.0	0.0	0.0	0.0	1.0	0.0	0.0	0.0	0.0	0.0	0.0	0.0	0.0	0.0	0.0
LINC01119	100134259	symbol	H. sapiens	100134259	H. sapiens	LINC01119	long intergenic non-protein coding RNA 1119								0.0	0.0	0.0	0.0	0.0	0.0	0.0	0.0	0.0	0.0	0.0	0.0	0.0	0.0	0.0	0.0	0.0	0.0	0.0	0.0
HOXC6	3223	symbol	H. sapiens	3223	H. sapiens	HOXC6	homeobox C6	GO:0048706 embryonic skeletal system development;GO:0009952 anterior/posterior pattern specification;GO:0003002 regionalization		Transcription factors:Helix-turn-helix domains; Predicted intracellular proteins	Nucleoplasm (Supported); Additional: Cytosol				0.0	0.0	0.0	0.0	0.0	0.0	0.0	0.0	0.0	1.0	0.0	0.0	0.0	0.0	0.0	0.0	0.0	0.0	0.0	0.0
LINC00856	100132987	symbol	H. sapiens	100132987	H. sapiens	LINC00856	long intergenic non-protein coding RNA 856								0.0	0.0	0.0	0.0	0.0	0.0	0.0	0.0	0.0	0.0	0.0	0.0	0.0	0.0	0.0	0.0	0.0	0.0	0.0	0.0
CEP112	201134	symbol	H. sapiens	201134	H. sapiens	CEP112	centrosomal protein 112	GO:0097120 receptor localization to synapse;GO:0031503 protein-containing complex localization;GO:0051179 localization		Predicted intracellular proteins	Centrosome;Nucleoplasm (Approved); Additional: Cytosol;Midbody ring				0.0	0.0	0.0	0.0	0.0	0.0	0.0	0.0	0.0	0.0	0.0	0.0	0.0	0.0	0.0	0.0	0.0	0.0	0.0	0.0
PDK4	5166	symbol	H. sapiens	5166	H. sapiens	PDK4	pyruvate dehydrogenase kinase 4	GO:0010510 regulation of acetyl-CoA biosynthetic process from pyruvate;GO:0050812 regulation of acyl-CoA biosynthetic process;GO:0042762 regulation of sulfur metabolic process	Atypical: PDK/BCKDK protein kinase family	Enzymes; Predicted intracellular proteins; Kinases:Atypical kinases; ENZYME proteins:Transferases		Tretinoin; 4-[4-(4-methoxyphenyl)-5-methyl-1H-pyrazol-3-yl]benzene-1,3-diol		(M5934)HALLMARK XENOBIOTIC METABOLISM; (M5936)HALLMARK OXIDATIVE PHOSPHORYLATION	0.0	1.0	0.0	0.0	0.0	1.0	0.0	0.0	0.0	0.0	0.0	0.0	0.0	0.0	0.0	0.0	0.0	0.0	0.0	0.0
ALDH1A3	220	symbol	H. sapiens	220	H. sapiens	ALDH1A3	aldehyde dehydrogenase 1 family member A3	GO:0021768 nucleus accumbens development;GO:0060166 olfactory pit development;GO:0070384 Harderian gland development		Human disease related genes:Congenital malformations:Congenital malformations of eye; ENZYME proteins:Oxidoreductases; Disease related genes; Potential drug targets; Enzymes; Predicted intracellular proteins	Nucleoplasm (Supported); Additional: Cytosol	NADH; Vitamin A		(M5908)HALLMARK ANDROGEN RESPONSE; (M5953)HALLMARK KRAS SIGNALING UP	0.0	1.0	0.0	0.0	0.0	1.0	0.0	0.0	0.0	0.0	0.0	0.0	0.0	0.0	0.0	0.0	0.0	0.0	0.0	0.0
NOSTRIN	115677	symbol	H. sapiens	115677	H. sapiens	NOSTRIN	nitric oxide synthase trafficking	GO:0016191 synaptic vesicle uncoating;GO:0072318 clathrin coat disassembly;GO:0072319 vesicle uncoating		Predicted intracellular proteins	Cytosol (Approved); Additional: Vesicles				0.0	0.0	0.0	0.0	0.0	0.0	0.0	0.0	0.0	0.0	0.0	0.0	0.0	0.0	0.0	0.0	0.0	0.0	0.0	0.0
TMBIM6	7009	symbol	H. sapiens	7009	H. sapiens	TMBIM6	transmembrane BAX inhibitor motif containing 6	GO:0060701 negative regulation of ribonuclease activity;GO:0060702 negative regulation of endoribonuclease activity;GO:0060699 regulation of endoribonuclease activity		Transporters:Transporter channels and pores; Predicted intracellular proteins				(M5941)HALLMARK UV RESPONSE UP; (M5934)HALLMARK XENOBIOTIC METABOLISM	0.0	0.0	0.0	0.0	1.0	0.0	0.0	1.0	0.0	0.0	0.0	0.0	0.0	0.0	0.0	0.0	0.0	0.0	0.0	0.0
CAMK2A	815	symbol	H. sapiens	815	H. sapiens	CAMK2A	calcium/calmodulin dependent protein kinase II alpha	GO:1990443 peptidyl-threonine autophosphorylation;GO:2000124 regulation of endocannabinoid signaling pathway;GO:0038166 angiotensin-activated signaling pathway	CAMK Ser/Thr protein kinase family	Human disease related genes:Other diseases:Mental and behavioural disorders; Kinases:CAMK Ser/Thr protein kinases; Disease related genes; Potential drug targets; Enzymes; ENZYME proteins:Transferases	Plasma membrane (Approved); Additional: Cell Junctions;Cytosol	Hexatantalum Dodecabromide; 1,4-Dithiothreitol; (2Z,3E)-2,3'-biindole-2',3(1H,1'H)-dione 3-{O-[(3R)-3,4-dihydroxybutyl]oxime}; Fostamatinib	(M23)PID WNT NONCANONICAL PATHWAY; (M108)PID NETRIN PATHWAY; (M271)PID PI3K PLC TRK PATHWAY		1.0	1.0	0.0	1.0	0.0	0.0	0.0	0.0	0.0	0.0	0.0	0.0	0.0	0.0	1.0	0.0	0.0	1.0	0.0	1.0
EHHADH	1962	symbol	H. sapiens	1962	H. sapiens	EHHADH	enoyl-CoA hydratase and 3-hydroxyacyl CoA dehydrogenase	GO:0033540 fatty acid beta-oxidation using acyl-CoA oxidase;GO:0006635 fatty acid beta-oxidation;GO:0019395 fatty acid oxidation		ENZYME proteins:Oxidoreductases; Human disease related genes:Congenital disorders of metabolism:Congenital disorders of amino acid metabolism; ENZYME proteins:Lyases; Disease related genes; Potential drug targets; Enzymes; ENZYME proteins:Isomerase; Predicted intracellular proteins		NADH		(M5949)HALLMARK PEROXISOME; (M5935)HALLMARK FATTY ACID METABOLISM	0.0	0.0	0.0	0.0	0.0	0.0	0.0	0.0	0.0	0.0	0.0	0.0	0.0	0.0	0.0	0.0	0.0	0.0	0.0	0.0
GGH	8836	symbol	H. sapiens	8836	H. sapiens	GGH	gamma-glutamyl hydrolase	GO:0046900 tetrahydrofolylpolyglutamate metabolic process;GO:0006760 folic acid-containing compound metabolic process;GO:0042558 pteridine-containing compound metabolic process		Enzymes; ENZYME proteins:Hydrolases; Predicted intracellular proteins; Peptidases:Cysteine-type peptidases				(M5941)HALLMARK UV RESPONSE UP	0.0	0.0	0.0	0.0	0.0	0.0	0.0	0.0	0.0	0.0	0.0	0.0	0.0	0.0	0.0	0.0	0.0	0.0	0.0	0.0
IL22RA1	58985	symbol	H. sapiens	58985	H. sapiens	IL22RA1	interleukin 22 receptor subunit alpha 1	GO:0050829 defense response to Gram-negative bacterium;GO:0042742 defense response to bacterium;GO:0019221 cytokine-mediated signaling pathway							1.0	0.0	0.0	0.0	0.0	0.0	0.0	0.0	1.0	0.0	0.0	0.0	0.0	0.0	0.0	0.0	0.0	0.0	0.0	0.0
FOXO1	2308	symbol	H. sapiens	2308	H. sapiens	FOXO1	forkhead box O1	GO:0071455 cellular response to hyperoxia;GO:0010616 negative regulation of cardiac muscle adaptation;GO:1903243 negative regulation of cardiac muscle hypertrophy in response to stress		Transcription factors:Helix-turn-helix domains; Cancer-related genes:Candidate cancer biomarkers; Human disease related genes:Cancers:Cancers of soft tissues and bone; Human disease related genes:Cancers:Cancers of haematopoietic and lymphoid tissues; Disease related genes; Predicted intracellular proteins	Cytosol;Nucleoplasm (Supported)		(M32)PID HDAC CLASSIII PATHWAY; (M249)PID PI3KCI AKT PATHWAY; (M183)PID IL6 7 PATHWAY	(M5957)HALLMARK PANCREAS BETA CELLS	1.0	1.0	0.0	0.0	1.0	0.0	1.0	0.0	0.0	0.0	0.0	0.0	0.0	0.0	1.0	1.0	0.0	1.0	0.0	0.0
KDM3A	55818	symbol	H. sapiens	55818	H. sapiens	KDM3A	lysine demethylase 3A	GO:0046293 formaldehyde biosynthetic process;GO:0036123 histone H3-K9 dimethylation;GO:0046292 formaldehyde metabolic process		Enzymes; Predicted intracellular proteins; ENZYME proteins:Oxidoreductases	Nucleoplasm (Enhanced)		(M58)PID AR PATHWAY	(M5891)HALLMARK HYPOXIA	0.0	0.0	0.0	0.0	0.0	1.0	0.0	0.0	1.0	0.0	0.0	0.0	0.0	0.0	0.0	0.0	0.0	0.0	0.0	0.0
GABRE	2564	symbol	H. sapiens	2564	H. sapiens	GABRE	gamma-aminobutyric acid type A receptor subunit epsilon	GO:2001226 negative regulation of chloride transport;GO:2001225 regulation of chloride transport;GO:0051932 synaptic transmission, GABAergic		FDA approved drug targets:Small molecule drugs		Ethanol; Fludiazepam			0.0	0.0	0.0	0.0	0.0	0.0	0.0	0.0	0.0	0.0	0.0	0.0	0.0	0.0	0.0	0.0	0.0	0.0	0.0	0.0
TRIM29	23650	symbol	H. sapiens	23650	H. sapiens	TRIM29	tripartite motif containing 29	GO:1900181 negative regulation of protein localization to nucleus;GO:1900180 regulation of protein localization to nucleus;GO:1903828 negative regulation of protein localization		Predicted intracellular proteins	Intermediate filaments (Approved); Additional: Cytosol;Nucleoplasm			(M5907)HALLMARK ESTROGEN RESPONSE LATE	1.0	0.0	0.0	0.0	0.0	0.0	0.0	0.0	0.0	0.0	1.0	0.0	0.0	0.0	0.0	0.0	0.0	0.0	0.0	0.0
TAB3	257397	symbol	H. sapiens	257397	H. sapiens	TAB3	TGF-beta activated kinase 1 (MAP3K7) binding protein 3	GO:0010507 negative regulation of autophagy;GO:0043123 positive regulation of I-kappaB kinase/NF-kappaB signaling;GO:0043122 regulation of I-kappaB kinase/NF-kappaB signaling		Predicted intracellular proteins	Cytosol;Nuclear speckles (Approved)				1.0	0.0	0.0	0.0	0.0	0.0	0.0	0.0	0.0	0.0	0.0	0.0	0.0	0.0	0.0	0.0	0.0	0.0	0.0	0.0
MSL3	10943	symbol	H. sapiens	10943	H. sapiens	MSL3	MSL complex subunit 3	GO:0043984 histone H4-K16 acetylation;GO:0043968 histone H2A acetylation;GO:0016575 histone deacetylation		Predicted intracellular proteins; Human disease related genes:Other diseases:Mental and behavioural disorders; Disease related genes	Nucleoplasm (Approved)				0.0	0.0	0.0	0.0	0.0	0.0	0.0	0.0	0.0	0.0	0.0	0.0	0.0	0.0	0.0	1.0	0.0	0.0	0.0	0.0
DYNC1I1	1780	symbol	H. sapiens	1780	H. sapiens	DYNC1I1	dynein cytoplasmic 1 intermediate chain 1	GO:0047496 vesicle transport along microtubule;GO:0099518 vesicle cytoskeletal trafficking;GO:0072384 organelle transport along microtubule		Predicted intracellular proteins					0.0	0.0	0.0	0.0	0.0	0.0	0.0	0.0	0.0	0.0	0.0	0.0	0.0	0.0	0.0	0.0	0.0	0.0	0.0	0.0
SYN3	8224	symbol	H. sapiens	8224	H. sapiens	SYN3	synapsin III	GO:0097091 synaptic vesicle clustering;GO:0032228 regulation of synaptic transmission, GABAergic;GO:0097479 synaptic vesicle localization		Predicted intracellular proteins					0.0	0.0	0.0	0.0	0.0	0.0	0.0	0.0	0.0	0.0	0.0	0.0	0.0	0.0	0.0	0.0	0.0	0.0	0.0	1.0
METAP1	23173	symbol	H. sapiens	23173	H. sapiens	METAP1	methionyl aminopeptidase 1	GO:0070084 protein initiator methionine removal;GO:0018206 peptidyl-methionine modification;GO:0031365 N-terminal protein amino acid modification		Enzymes; ENZYME proteins:Hydrolases; Predicted intracellular proteins; Peptidases:Metallopeptidases	Cytosol (Approved); Additional: Nucleoplasm;Plasma membrane	Ovalicin; 5-CHLORO-6-METHYL-N-(2-PHENYLETHYL)-2-PYRIDIN-2-YLPYRIMIDIN-4-AMINE; TERT-BUTYL {2-[(1,3-THIAZOL-2-YLAMINO)CARBONYL]PYRIDIN-3-YL}CARBAMATE; 3-[(2,2-DIMETHYLPROPANOYL)AMINO]-N-1,3-THIAZOL-2-YLPYRIDINE-2-CARBOXAMIDE		(M5935)HALLMARK FATTY ACID METABOLISM	0.0	0.0	0.0	0.0	0.0	0.0	0.0	0.0	0.0	0.0	1.0	0.0	0.0	0.0	0.0	0.0	0.0	0.0	0.0	0.0
ITFG2	55846	symbol	H. sapiens	55846	H. sapiens	ITFG2	integrin alpha FG-GAP repeat containing 2	GO:0002314 germinal center B cell differentiation;GO:1904262 negative regulation of TORC1 signaling;GO:0002313 mature B cell differentiation involved in immune response		Predicted intracellular proteins	Endoplasmic reticulum (Uncertain)				0.0	1.0	0.0	0.0	1.0	0.0	0.0	0.0	0.0	0.0	0.0	0.0	0.0	0.0	0.0	0.0	0.0	0.0	0.0	0.0
CALU	813	symbol	H. sapiens	813	H. sapiens	CALU	calumenin	GO:0008150 biological_process		Predicted intracellular proteins	Endoplasmic reticulum (Supported)			(M5930)HALLMARK EPITHELIAL MESENCHYMAL TRANSITION	0.0	0.0	0.0	0.0	0.0	0.0	0.0	0.0	0.0	0.0	0.0	0.0	0.0	0.0	0.0	0.0	0.0	1.0	0.0	0.0
ZDHHC12	84885	symbol	H. sapiens	84885	H. sapiens	ZDHHC12	zinc finger DHHC-type palmitoyltransferase 12	GO:0097116 gephyrin clustering involved in postsynaptic density assembly;GO:0097107 postsynaptic density assembly;GO:0098698 postsynaptic specialization assembly		Enzymes; ENZYME proteins:Transferases	Nucleoplasm (Approved); Additional: Intermediate filaments				0.0	0.0	0.0	0.0	0.0	0.0	0.0	0.0	0.0	0.0	0.0	0.0	0.0	0.0	0.0	1.0	0.0	0.0	0.0	0.0
FASTKD3	79072	symbol	H. sapiens	79072	H. sapiens	FASTKD3	FAST kinase domains 3	GO:0044528 regulation of mitochondrial mRNA stability;GO:0070131 positive regulation of mitochondrial translation;GO:0000963 mitochondrial RNA processing		Predicted intracellular proteins	Mitochondria;Nucleoplasm (Supported)				0.0	0.0	0.0	0.0	0.0	0.0	0.0	0.0	0.0	0.0	0.0	0.0	0.0	0.0	0.0	0.0	0.0	0.0	0.0	0.0
PRIMA1	145270	symbol	H. sapiens	145270	H. sapiens	PRIMA1	proline rich membrane anchor 1	GO:0042135 neurotransmitter catabolic process;GO:0042133 neurotransmitter metabolic process;GO:0001505 regulation of neurotransmitter levels			Plasma membrane (Approved); Additional: Cytosol;Nucleoli				0.0	0.0	0.0	0.0	0.0	0.0	0.0	0.0	0.0	0.0	0.0	0.0	0.0	0.0	0.0	0.0	0.0	0.0	0.0	1.0
KLF6	1316	symbol	H. sapiens	1316	H. sapiens	KLF6	Kruppel like factor 6	GO:0030183 B cell differentiation;GO:0042113 B cell activation;GO:0030098 lymphocyte differentiation		Transcription factors:Zinc-coordinating DNA-binding domains; Predicted intracellular proteins; Cancer-related genes; Disease related genes	Nucleoplasm (Supported); Additional: Cytosol;Nucleoli;Vesicles			(M5947)HALLMARK IL2 STAT5 SIGNALING; (M5890)HALLMARK TNFA SIGNALING VIA NFKB; (M5891)HALLMARK HYPOXIA	0.0	0.0	0.0	0.0	0.0	0.0	0.0	0.0	0.0	0.0	0.0	0.0	0.0	0.0	0.0	0.0	0.0	0.0	0.0	0.0
CPNE5	57699	symbol	H. sapiens	57699	H. sapiens	CPNE5	copine 5	GO:1903861 positive regulation of dendrite extension;GO:1903859 regulation of dendrite extension;GO:0071277 cellular response to calcium ion		Predicted intracellular proteins	Cytosol (Approved)				0.0	0.0	0.0	0.0	0.0	0.0	0.0	0.0	0.0	0.0	0.0	0.0	0.0	0.0	0.0	0.0	0.0	0.0	0.0	0.0
GOLGA8A	23015	symbol	H. sapiens	23015	H. sapiens	GOLGA8A	golgin A8 family member A	GO:0051225 spindle assembly;GO:0007030 Golgi organization;GO:0007051 spindle organization		Predicted intracellular proteins	Golgi apparatus (Approved); Additional: Cytosol				0.0	0.0	0.0	0.0	0.0	0.0	0.0	0.0	0.0	0.0	0.0	0.0	0.0	0.0	0.0	0.0	0.0	0.0	0.0	0.0
NEK11	79858	symbol	H. sapiens	79858	H. sapiens	NEK11	NIMA related kinase 11	GO:0031573 mitotic intra-S DNA damage checkpoint signaling;GO:0016572 histone phosphorylation;GO:0044773 mitotic DNA damage checkpoint signaling	NEK Ser/Thr protein kinase family	Enzymes; Predicted intracellular proteins; ENZYME proteins:Transferases; Kinases:NEK Ser/Thr protein kinases	Nucleoplasm (Supported)	Dabrafenib; Fostamatinib			0.0	0.0	0.0	0.0	0.0	0.0	0.0	0.0	0.0	0.0	0.0	0.0	0.0	0.0	0.0	0.0	0.0	0.0	0.0	0.0
MSTN	2660	symbol	H. sapiens	2660	H. sapiens	MSTN	myostatin	GO:0048632 negative regulation of skeletal muscle tissue growth;GO:0014839 myoblast migration involved in skeletal muscle regeneration;GO:0014859 negative regulation of skeletal muscle cell proliferation		Predicted secreted proteins; Human disease related genes:Musculoskeletal diseases:Muscular diseases; Disease related genes		MYO-029	(M5883)NABA SECRETED FACTORS; (M5885)NABA MATRISOME ASSOCIATED; (M5889)NABA MATRISOME		0.0	0.0	1.0	0.0	1.0	0.0	0.0	0.0	1.0	0.0	0.0	0.0	0.0	0.0	0.0	0.0	0.0	0.0	0.0	0.0
DUSP12	11266	symbol	H. sapiens	11266	H. sapiens	DUSP12	dual specificity phosphatase 12	GO:0033133 positive regulation of glucokinase activity;GO:1903301 positive regulation of hexokinase activity;GO:0033131 regulation of glucokinase activity		Enzymes; ENZYME proteins:Hydrolases; Predicted intracellular proteins	Nucleoplasm (Supported)				0.0	0.0	0.0	0.0	0.0	0.0	0.0	0.0	0.0	0.0	0.0	0.0	0.0	0.0	0.0	0.0	0.0	0.0	0.0	0.0
CKAP2	26586	symbol	H. sapiens	26586	H. sapiens	CKAP2	cytoskeleton associated protein 2	GO:0007026 negative regulation of microtubule depolymerization;GO:0031114 regulation of microtubule depolymerization;GO:0031111 negative regulation of microtubule polymerization or depolymerization		Predicted intracellular proteins	Microtubules;Mitotic spindle (Enhanced); Additional: Centrosome				0.0	0.0	0.0	0.0	0.0	0.0	0.0	0.0	0.0	0.0	0.0	0.0	0.0	0.0	0.0	0.0	0.0	0.0	0.0	0.0
MYHAS	100128560	symbol	H. sapiens	100128560	H. sapiens	MYHAS	myosin heavy chain gene cluster antisense RNA								0.0	0.0	0.0	0.0	0.0	0.0	0.0	0.0	0.0	0.0	0.0	0.0	0.0	0.0	0.0	0.0	0.0	0.0	0.0	0.0
LOC653602	151354	Gene_ID	H. sapiens	151354	H. sapiens	LRATD1	LRAT domain containing 1	GO:0000902 cell morphogenesis;GO:0048870 cell motility;GO:0051674 localization of cell		Predicted intracellular proteins	Nucleoplasm (Approved)				0.0	0.0	0.0	0.0	0.0	0.0	0.0	0.0	0.0	0.0	0.0	0.0	0.0	0.0	0.0	0.0	0.0	0.0	0.0	0.0
HOXC8	3224	symbol	H. sapiens	3224	H. sapiens	HOXC8	homeobox C8	GO:0009952 anterior/posterior pattern specification;GO:0048705 skeletal system morphogenesis;GO:0003002 regionalization		Transcription factors:Helix-turn-helix domains; Predicted intracellular proteins	Nucleoplasm (Supported); Additional: Microtubules				0.0	0.0	0.0	0.0	0.0	0.0	0.0	0.0	0.0	1.0	0.0	0.0	0.0	0.0	0.0	0.0	0.0	0.0	0.0	0.0
CA9	768	symbol	H. sapiens	768	H. sapiens	CA9	carbonic anhydrase 9	GO:0006730 one-carbon metabolic process;GO:0033574 response to testosterone;GO:1901654 response to ketone		FDA approved drug targets:Small molecule drugs; Transporters:Accessory Factors Involved in Transport; ENZYME proteins:Lyases; Enzymes; Predicted intracellular proteins	Plasma membrane (Supported)	Benzthiazide; Hydroflumethiazide; Zonisamide; Girentuximab; Ellagic acid; Sodium carbonate	(M255)PID HIF1 TFPATHWAY		0.0	0.0	0.0	0.0	0.0	0.0	1.0	0.0	0.0	0.0	0.0	0.0	0.0	0.0	0.0	0.0	0.0	0.0	0.0	0.0
CARD6	84674	symbol	H. sapiens	84674	H. sapiens	CARD6	caspase recruitment domain family member 6	GO:0006915 apoptotic process;GO:0012501 programmed cell death;GO:0008219 cell death		Predicted intracellular proteins					0.0	0.0	0.0	0.0	0.0	0.0	0.0	0.0	0.0	0.0	0.0	0.0	0.0	0.0	0.0	0.0	0.0	0.0	0.0	0.0
TRPA1	8989	symbol	H. sapiens	8989	H. sapiens	TRPA1	transient receptor potential cation channel subfamily A member 1	GO:0050968 detection of chemical stimulus involved in sensory perception of pain;GO:0050955 thermoception;GO:0050966 detection of mechanical stimulus involved in sensory perception of pain		FDA approved drug targets:Small molecule drugs; Voltage-gated ion channels:Transient Receptor Potential Channels; Disease related genes; Transporters:Transporter channels and pores; Human disease related genes:Musculoskeletal diseases:Other musculoskeletal diseases		Levomenthol; Camphor; Cannabidiol; Butamben; (S)-camphor; Tetrahydrocannabivarin; Medical Cannabis; Nabiximols; Cannabidivarin			0.0	0.0	0.0	1.0	0.0	0.0	0.0	0.0	0.0	0.0	0.0	0.0	0.0	0.0	0.0	0.0	0.0	0.0	0.0	0.0
GNB5	10681	symbol	H. sapiens	10681	H. sapiens	GNB5	G protein subunit beta 5	GO:0036367 light adaption;GO:0009646 response to absence of light;GO:0071485 cellular response to absence of light		Predicted intracellular proteins; RAS pathway related proteins; Human disease related genes:Other diseases:Mental and behavioural disorders; Disease related genes	Nuclear speckles (Approved); Additional: Centrosome;Rods & Rings		(M117)PID CONE PATHWAY; (M204)PID RHODOPSIN PATHWAY; (M99)PID TXA2PATHWAY		0.0	1.0	0.0	0.0	0.0	1.0	0.0	0.0	0.0	0.0	0.0	0.0	0.0	0.0	1.0	0.0	0.0	1.0	0.0	0.0
RAD21	5885	symbol	H. sapiens	5885	H. sapiens	RAD21	RAD21 cohesin complex component	GO:1990414 replication-born double-strand break repair via sister chromatid exchange;GO:0045876 positive regulation of sister chromatid cohesion;GO:0007064 mitotic sister chromatid cohesion		Cancer-related genes:Mutated cancer genes; Cancer-related genes:Mutational cancer driver genes; Human disease related genes:Congenital malformations:Other congenital malformations; Disease related genes; Predicted intracellular proteins	Nucleoplasm (Enhanced)			(M5901)HALLMARK G2M CHECKPOINT; (M5925)HALLMARK E2F TARGETS	0.0	0.0	0.0	0.0	0.0	1.0	0.0	0.0	0.0	0.0	0.0	0.0	1.0	0.0	0.0	0.0	0.0	0.0	0.0	0.0
BACE1	23621	symbol	H. sapiens	23621	H. sapiens	BACE1	beta-secretase 1	GO:0034205 amyloid-beta formation;GO:0060134 prepulse inhibition;GO:0071287 cellular response to manganese ion		ENZYME proteins:Hydrolases; Transporters:Accessory Factors Involved in Transport; Peptidases:Aspartic-type peptidases; Enzymes; Predicted intracellular proteins	Plasma membrane (Supported)	MMI-175; CTS-21166; N-[amino(imino)methyl]-2-(2,5-diphenyl-1H-pyrrol-1-yl)acetamide; N-[(5R,14R)-5-AMINO-5,14-DIMETHYL-4-OXO-3-OXA-18-AZATRICYCLO[15.3.1.1~7,11~]DOCOSA-1(21),7(22),8,10,17,19-HEXAEN-19-YL]-N-METHYLMETHANESULFONAMIDE; N-[amino(imino)methyl]-2-[2-(2-chlorophenyl)-4-(4-propoxyphenyl)-3-thienyl]acetamide; 4-(4-FLUOROBENZYL)PIPERIDINE; N-{2-methyl-5-[(6-phenylpyrimidin-4-yl)amino]pheny…			0.0	1.0	0.0	0.0	0.0	0.0	0.0	0.0	0.0	0.0	0.0	0.0	0.0	1.0	0.0	0.0	0.0	0.0	1.0	1.0
SPAG4	6676	symbol	H. sapiens	6676	H. sapiens	SPAG4	sperm associated antigen 4	GO:0006998 nuclear envelope organization;GO:0006997 nucleus organization;GO:0010256 endomembrane system organization		Predicted intracellular proteins				(M5937)HALLMARK GLYCOLYSIS	0.0	0.0	0.0	0.0	0.0	0.0	0.0	0.0	0.0	0.0	0.0	0.0	0.0	0.0	0.0	0.0	0.0	0.0	0.0	0.0
HYLS1	219844	symbol	H. sapiens	219844	H. sapiens	HYLS1	HYLS1 centriolar and ciliogenesis associated	GO:0060271 cilium assembly;GO:0044782 cilium organization;GO:0120031 plasma membrane bounded cell projection assembly		Human disease related genes:Congenital malformations:Other congenital malformations; Predicted intracellular proteins; Disease related genes	Cytosol;Plasma membrane (Supported)				0.0	0.0	0.0	0.0	0.0	0.0	0.0	0.0	0.0	0.0	0.0	0.0	0.0	0.0	0.0	0.0	0.0	0.0	0.0	0.0
FMOD	2331	symbol	H. sapiens	2331	H. sapiens	FMOD	fibromodulin	GO:0007181 transforming growth factor beta receptor complex assembly;GO:0030199 collagen fibril organization;GO:0007179 transforming growth factor beta receptor signaling pathway		Predicted secreted proteins; Predicted intracellular proteins			(M5882)NABA PROTEOGLYCANS; (M5884)NABA CORE MATRISOME; (M5889)NABA MATRISOME	(M5930)HALLMARK EPITHELIAL MESENCHYMAL TRANSITION	0.0	0.0	0.0	0.0	0.0	0.0	0.0	0.0	0.0	0.0	0.0	0.0	0.0	0.0	0.0	0.0	0.0	0.0	1.0	0.0
CNRIP1	25927	symbol	H. sapiens	25927	H. sapiens	CNRIP1	cannabinoid receptor interacting protein 1	GO:2000272 negative regulation of signaling receptor activity;GO:0010469 regulation of signaling receptor activity;GO:0044092 negative regulation of molecular function		Predicted intracellular proteins	Cytosol (Approved)				0.0	0.0	0.0	0.0	0.0	0.0	0.0	0.0	0.0	0.0	0.0	0.0	0.0	0.0	0.0	0.0	0.0	0.0	0.0	0.0
HOXB5	3215	symbol	H. sapiens	3215	H. sapiens	HOXB5	homeobox B5	GO:0045446 endothelial cell differentiation;GO:0003158 endothelium development;GO:0048704 embryonic skeletal system morphogenesis		Transcription factors:Helix-turn-helix domains; Predicted intracellular proteins	Nucleoplasm (Supported); Additional: Cytosol;Nucleoli fibrillar center				0.0	0.0	0.0	0.0	0.0	0.0	0.0	0.0	0.0	1.0	0.0	0.0	0.0	0.0	0.0	0.0	0.0	0.0	0.0	0.0
CLK1	1195	symbol	H. sapiens	1195	H. sapiens	CLK1	CDC like kinase 1	GO:0018107 peptidyl-threonine phosphorylation;GO:0018210 peptidyl-threonine modification;GO:0018108 peptidyl-tyrosine phosphorylation	CMGC Ser/Thr protein kinase family	Enzymes; Kinases:CMGC Ser/Thr protein kinases; Predicted intracellular proteins; ENZYME proteins:Transferases	Nuclear membrane;Nucleoplasm (Supported)	Debromohymenialdisine; CHGN111; ethyl 3-[(E)-2-amino-1-cyanoethenyl]-6,7-dichloro-1-methyl-1H-indole-2-carboxylate; Fostamatinib			0.0	0.0	0.0	0.0	0.0	0.0	0.0	0.0	0.0	0.0	0.0	0.0	0.0	0.0	0.0	0.0	0.0	0.0	0.0	0.0
CCDC82	79780	symbol	H. sapiens	79780	H. sapiens	CCDC82	coiled-coil domain containing 82			Predicted intracellular proteins	Nucleoplasm (Approved); Additional: Cytosol;Nuclear bodies				0.0	0.0	0.0	0.0	0.0	0.0	0.0	0.0	0.0	0.0	0.0	0.0	0.0	0.0	0.0	0.0	0.0	0.0	0.0	0.0
RBM45	129831	symbol	H. sapiens	129831	H. sapiens	RBM45	RNA binding motif protein 45	GO:0007399 nervous system development;GO:0030154 cell differentiation;GO:0048869 cellular developmental process		Predicted intracellular proteins	Nucleoplasm (Supported)				0.0	0.0	0.0	0.0	0.0	0.0	0.0	0.0	0.0	0.0	0.0	0.0	0.0	0.0	0.0	0.0	0.0	0.0	0.0	0.0
LPXN	9404	symbol	H. sapiens	9404	H. sapiens	LPXN	leupaxin	GO:0050859 negative regulation of B cell receptor signaling pathway;GO:0050855 regulation of B cell receptor signaling pathway;GO:0050858 negative regulation of antigen receptor-mediated signaling pathway		Predicted intracellular proteins	Focal adhesion sites (Supported); Additional: Cytosol;Nuclear speckles				0.0	0.0	0.0	0.0	0.0	0.0	0.0	0.0	0.0	0.0	0.0	0.0	0.0	0.0	0.0	0.0	0.0	0.0	0.0	0.0
CCL26	10344	symbol	H. sapiens	10344	H. sapiens	CCL26	C-C motif chemokine ligand 26	GO:0010818 T cell chemotaxis;GO:0048245 eosinophil chemotaxis;GO:0072677 eosinophil migration		Predicted secreted proteins; Human disease related genes:Immune system diseases:Allergies and autoimmune diseases			(M28)PID IL4 2PATHWAY; (M5883)NABA SECRETED FACTORS; (M5885)NABA MATRISOME ASSOCIATED		0.0	0.0	0.0	0.0	0.0	0.0	0.0	0.0	1.0	0.0	0.0	0.0	0.0	0.0	0.0	0.0	0.0	0.0	0.0	0.0
MANBAL	63905	symbol	H. sapiens	63905	H. sapiens	MANBAL	mannosidase beta like				Mitochondria (Approved); Additional: Nucleoplasm				0.0	0.0	0.0	0.0	0.0	0.0	0.0	0.0	0.0	0.0	0.0	0.0	0.0	0.0	0.0	0.0	0.0	0.0	0.0	0.0
RABGEF1	27342	symbol	H. sapiens	27342	H. sapiens	RABGEF1	RAB guanine nucleotide exchange factor 1	GO:1900234 regulation of Kit signaling pathway;GO:1900235 negative regulation of Kit signaling pathway;GO:0043305 negative regulation of mast cell degranulation		Transporters:Transporter channels and pores; Predicted intracellular proteins	Cytosol (Supported); Additional: Nucleoli		(M269)PID RAS PATHWAY		0.0	0.0	0.0	0.0	1.0	0.0	0.0	1.0	0.0	0.0	0.0	0.0	0.0	0.0	0.0	1.0	0.0	0.0	0.0	0.0
EPS8L2	64787	symbol	H. sapiens	64787	H. sapiens	EPS8L2	EPS8 like 2	GO:1900029 positive regulation of ruffle assembly;GO:1900027 regulation of ruffle assembly;GO:0007266 Rho protein signal transduction		Human disease related genes:Nervous system diseases:Ear disease; Predicted intracellular proteins; Disease related genes	Cytosol (Supported)			(M5939)HALLMARK P53 PATHWAY	0.0	0.0	0.0	0.0	0.0	0.0	0.0	0.0	0.0	0.0	0.0	0.0	0.0	0.0	0.0	0.0	0.0	0.0	0.0	0.0
SNAI1	6615	symbol	H. sapiens	6615	H. sapiens	SNAI1	snail family transcriptional repressor 1	GO:0060806 negative regulation of cell differentiation involved in embryonic placenta development;GO:0060800 regulation of cell differentiation involved in embryonic placenta development;GO:0010957 negative regulation of vitamin D biosynthetic process		Predicted intracellular proteins; Transcription factors:Zinc-coordinating DNA-binding domains	Nucleoplasm (Supported)		(M71)PID ILK PATHWAY; (M48)PID MET PATHWAY; (M66)PID MYC ACTIV PATHWAY		0.0	0.0	0.0	0.0	1.0	0.0	0.0	0.0	0.0	1.0	0.0	0.0	0.0	1.0	1.0	0.0	1.0	0.0	0.0	0.0
CEP89	84902	symbol	H. sapiens	84902	H. sapiens	CEP89	centrosomal protein 89	GO:1905515 non-motile cilium assembly;GO:0060271 cilium assembly;GO:0044782 cilium organization		Predicted intracellular proteins; Disease related genes	Cytosol (Supported); Additional: Plasma membrane				0.0	0.0	0.0	0.0	0.0	0.0	0.0	0.0	0.0	0.0	0.0	0.0	0.0	0.0	0.0	0.0	0.0	0.0	0.0	0.0
SHE	126669	symbol	H. sapiens	126669	H. sapiens	SHE	Src homology 2 domain containing E			Predicted secreted proteins; Predicted intracellular proteins	Nucleoplasm (Approved); Additional: Cytosol			(M5951)HALLMARK SPERMATOGENESIS; (M5947)HALLMARK IL2 STAT5 SIGNALING	0.0	0.0	0.0	0.0	0.0	0.0	0.0	0.0	0.0	0.0	0.0	0.0	0.0	0.0	0.0	0.0	0.0	0.0	0.0	0.0
PLA2G4C	8605	symbol	H. sapiens	8605	H. sapiens	PLA2G4C	phospholipase A2 group IVC	GO:0006663 platelet activating factor biosynthetic process;GO:0046469 platelet activating factor metabolic process;GO:0036152 phosphatidylethanolamine acyl-chain remodeling		Enzymes; ENZYME proteins:Hydrolases; RAS pathway related proteins; Predicted intracellular proteins	Cytosol (Approved)				0.0	0.0	0.0	1.0	0.0	0.0	0.0	0.0	0.0	0.0	0.0	0.0	0.0	0.0	0.0	0.0	0.0	0.0	0.0	0.0
STMN2	11075	symbol	H. sapiens	11075	H. sapiens	STMN2	stathmin 2	GO:0031117 positive regulation of microtubule depolymerization;GO:0031115 negative regulation of microtubule polymerization;GO:0007019 microtubule depolymerization		Predicted intracellular proteins	Vesicles (Approved); Additional: Endoplasmic reticulum				0.0	0.0	0.0	0.0	0.0	0.0	0.0	0.0	0.0	0.0	0.0	0.0	0.0	0.0	0.0	0.0	0.0	0.0	1.0	0.0
CBX7	23492	symbol	H. sapiens	23492	H. sapiens	CBX7	chromobox 7	GO:0032968 positive regulation of transcription elongation from RNA polymerase II promoter;GO:0032786 positive regulation of DNA-templated transcription, elongation;GO:0034243 regulation of transcription elongation from RNA polymerase II promoter		Predicted intracellular proteins	Nucleoplasm (Supported); Additional: Cytosol				0.0	0.0	0.0	0.0	0.0	0.0	0.0	0.0	0.0	0.0	0.0	0.0	0.0	0.0	0.0	0.0	0.0	0.0	0.0	0.0
LEO1	123169	symbol	H. sapiens	123169	H. sapiens	LEO1	LEO1 homolog, Paf1/RNA polymerase II complex component	GO:0031442 positive regulation of mRNA 3'-end processing;GO:0033523 histone H2B ubiquitination;GO:0001711 endodermal cell fate commitment		Predicted intracellular proteins	Nucleoli fibrillar center;Nucleoplasm (Enhanced); Additional: Centrosome				0.0	0.0	0.0	0.0	0.0	0.0	0.0	0.0	0.0	0.0	0.0	0.0	0.0	1.0	0.0	0.0	0.0	0.0	0.0	0.0
NFATC2IP	84901	symbol	H. sapiens	84901	H. sapiens	NFATC2IP	nuclear factor of activated T cells 2 interacting protein	GO:0001816 cytokine production;GO:0045944 positive regulation of transcription by RNA polymerase II;GO:0045893 positive regulation of transcription, DNA-templated		Predicted intracellular proteins	Nucleoplasm (Approved)				0.0	0.0	0.0	0.0	0.0	0.0	0.0	0.0	0.0	0.0	0.0	0.0	0.0	0.0	0.0	0.0	0.0	0.0	0.0	0.0
EMX2OS	196047	symbol	H. sapiens	196047	H. sapiens	EMX2OS	EMX2 opposite strand/antisense RNA								0.0	0.0	0.0	0.0	0.0	0.0	0.0	0.0	0.0	0.0	0.0	0.0	0.0	0.0	0.0	0.0	0.0	0.0	0.0	0.0
CEP162	22832	symbol	H. sapiens	22832	H. sapiens	CEP162	centrosomal protein 162	GO:0060271 cilium assembly;GO:0044782 cilium organization;GO:0120031 plasma membrane bounded cell projection assembly		Predicted intracellular proteins	Centriolar satellite;Cytosol;Nucleoplasm (Approved)				0.0	0.0	0.0	0.0	0.0	0.0	0.0	0.0	0.0	0.0	0.0	0.0	0.0	0.0	0.0	0.0	0.0	0.0	0.0	0.0
ZNF217	7764	symbol	H. sapiens	7764	H. sapiens	ZNF217	zinc finger protein 217	GO:0000122 negative regulation of transcription by RNA polymerase II;GO:0045892 negative regulation of transcription, DNA-templated;GO:1903507 negative regulation of nucleic acid-templated transcription		Predicted intracellular proteins; Transcription factors:Zinc-coordinating DNA-binding domains	Nuclear speckles (Enhanced)				0.0	0.0	0.0	0.0	0.0	1.0	0.0	0.0	0.0	0.0	0.0	0.0	0.0	0.0	0.0	0.0	0.0	0.0	0.0	0.0
LOC104968399	104968399	Gene_ID	H. sapiens	104968399	H. sapiens	MYL12-AS1	MYL12A and MYL12B antisense RNA 1								0.0	0.0	0.0	0.0	0.0	0.0	0.0	0.0	0.0	0.0	0.0	0.0	0.0	0.0	0.0	0.0	0.0	0.0	0.0	0.0
SERPINB8	5271	symbol	H. sapiens	5271	H. sapiens	SERPINB8	serpin family B member 8	GO:0090136 epithelial cell-cell adhesion;GO:0010951 negative regulation of endopeptidase activity;GO:0010466 negative regulation of peptidase activity		Human disease related genes:Congenital malformations:Congenital malformations of skin; Predicted intracellular proteins; Disease related genes	Nucleoplasm (Approved); Additional: Cytosol		(M3468)NABA ECM REGULATORS; (M5885)NABA MATRISOME ASSOCIATED; (M5889)NABA MATRISOME	(M5890)HALLMARK TNFA SIGNALING VIA NFKB	0.0	0.0	0.0	0.0	0.0	0.0	0.0	0.0	0.0	0.0	1.0	0.0	0.0	0.0	0.0	0.0	0.0	0.0	0.0	0.0
LINC01305	285084	symbol	H. sapiens	285084	H. sapiens	LINC01305	long intergenic non-protein coding RNA 1305								0.0	0.0	0.0	0.0	0.0	0.0	0.0	0.0	0.0	0.0	0.0	0.0	0.0	0.0	0.0	0.0	0.0	0.0	0.0	0.0
FAM162A	26355	symbol	H. sapiens	26355	H. sapiens	FAM162A	family with sequence similarity 162 member A	GO:0090200 positive regulation of release of cytochrome c from mitochondria;GO:0090199 regulation of release of cytochrome c from mitochondria;GO:0051402 neuron apoptotic process			Mitochondria (Supported)			(M5891)HALLMARK HYPOXIA; (M5937)HALLMARK GLYCOLYSIS; (M5939)HALLMARK P53 PATHWAY	0.0	1.0	0.0	0.0	0.0	0.0	1.0	0.0	0.0	0.0	0.0	0.0	0.0	0.0	0.0	0.0	0.0	0.0	0.0	0.0
ZADH2	284273	symbol	H. sapiens	284273	H. sapiens	ZADH2	zinc binding alcohol dehydrogenase domain containing 2	GO:0006692 prostanoid metabolic process;GO:0006693 prostaglandin metabolic process;GO:0045599 negative regulation of fat cell differentiation		Enzymes; Predicted intracellular proteins; ENZYME proteins:Oxidoreductases	Vesicles (Approved); Additional: Golgi apparatus;Nucleoplasm				0.0	0.0	0.0	0.0	0.0	0.0	0.0	0.0	0.0	0.0	0.0	0.0	0.0	0.0	0.0	0.0	0.0	0.0	0.0	0.0
SBDS	51119	symbol	H. sapiens	51119	H. sapiens	SBDS	SBDS ribosome maturation factor	GO:0042256 mature ribosome assembly;GO:0048539 bone marrow development;GO:0001833 inner cell mass cell proliferation		Human disease related genes:Immune system diseases:Primary immunodeficiency; Human disease related genes:Other congenital disorders:Ribosomopathies; Disease related genes; Predicted intracellular proteins; Cancer-related genes	Cytosol;Nucleoplasm (Supported)				0.0	0.0	0.0	0.0	0.0	0.0	0.0	0.0	0.0	1.0	0.0	0.0	0.0	0.0	0.0	0.0	0.0	0.0	0.0	0.0
NDRG1	10397	symbol	H. sapiens	10397	H. sapiens	NDRG1	N-myc downstream regulated 1	GO:0032287 peripheral nervous system myelin maintenance;GO:0043217 myelin maintenance;GO:0045576 mast cell activation		Predicted intracellular proteins; Human disease related genes:Nervous system diseases:Neurodegenerative diseases; Disease related genes; Cancer-related genes:Candidate cancer biomarkers	Cytosol (Supported); Additional: Microtubules		(M254)PID MYC REPRESS PATHWAY; (M255)PID HIF1 TFPATHWAY; (M145)PID P53 DOWNSTREAM PATHWAY	(M5908)HALLMARK ANDROGEN RESPONSE; (M5947)HALLMARK IL2 STAT5 SIGNALING; (M5891)HALLMARK HYPOXIA	0.0	0.0	0.0	0.0	0.0	0.0	1.0	0.0	0.0	0.0	0.0	0.0	0.0	0.0	0.0	0.0	0.0	1.0	0.0	0.0
IL1RAP	3556	symbol	H. sapiens	3556	H. sapiens	IL1RAP	interleukin 1 receptor accessory protein	GO:0038172 interleukin-33-mediated signaling pathway;GO:0099545 trans-synaptic signaling by trans-synaptic complex;GO:0099151 regulation of postsynaptic density assembly		Enzymes; ENZYME proteins:Hydrolases; Predicted secreted proteins; Predicted intracellular proteins	Cytosol;Vesicles (Approved)		(M110)PID IL1 PATHWAY; (M19)PID P73PATHWAY		1.0	0.0	0.0	1.0	0.0	0.0	0.0	0.0	1.0	0.0	1.0	0.0	0.0	0.0	1.0	0.0	0.0	0.0	0.0	0.0
PDIA3	2923	symbol	H. sapiens	2923	H. sapiens	PDIA3	protein disulfide isomerase family A member 3	GO:0002397 MHC class I protein complex assembly;GO:0002502 peptide antigen assembly with MHC class I protein complex;GO:0034975 protein folding in endoplasmic reticulum		Enzymes; ENZYME proteins:Isomerase; Predicted intracellular proteins	Endoplasmic reticulum (Enhanced)	Zinc; Copper; Zinc acetate; Zinc chloride; Zinc sulfate, unspecified form			0.0	1.0	0.0	0.0	0.0	0.0	0.0	0.0	1.0	0.0	0.0	0.0	1.0	0.0	0.0	0.0	0.0	0.0	0.0	0.0
SNTA1	6640	symbol	H. sapiens	6640	H. sapiens	SNTA1	syntrophin alpha 1	GO:0003116 regulation of vasoconstriction by norepinephrine;GO:0003117 regulation of vasoconstriction by circulating norepinephrine;GO:1902083 negative regulation of peptidyl-cysteine S-nitrosylation		Predicted intracellular proteins; Human disease related genes:Cardiovascular diseases:Cardiac diseases; Disease related genes			(M209)PID P38 GAMMA DELTA PATHWAY		0.0	0.0	0.0	0.0	0.0	0.0	0.0	0.0	0.0	0.0	0.0	0.0	0.0	0.0	0.0	0.0	0.0	0.0	0.0	0.0
CERKL	375298	symbol	H. sapiens	375298	H. sapiens	CERKL	ceramide kinase like	GO:0046834 lipid phosphorylation;GO:0030148 sphingolipid biosynthetic process;GO:0046467 membrane lipid biosynthetic process		Human disease related genes:Nervous system diseases:Eye disease; Predicted intracellular proteins; Disease related genes	Cytosol;Nucleoplasm (Approved)				0.0	0.0	0.0	0.0	0.0	0.0	0.0	0.0	0.0	0.0	0.0	0.0	0.0	0.0	0.0	0.0	0.0	0.0	0.0	0.0
PGK1	5230	symbol	H. sapiens	5230	H. sapiens	PGK1	phosphoglycerate kinase 1	GO:0031639 plasminogen activation;GO:0006094 gluconeogenesis;GO:0019319 hexose biosynthetic process		Human disease related genes:Cardiovascular diseases:Hematologic diseases; Disease related genes; Potential drug targets; Enzymes; Predicted intracellular proteins; ENZYME proteins:Transferases		Adenosine-5'-[Beta, Gamma-Methylene]Triphosphate; 3-phospho-D-glyceric acid; Copper; Artenimol	(M44)PID HIF2PATHWAY; (M255)PID HIF1 TFPATHWAY	(M5891)HALLMARK HYPOXIA; (M5924)HALLMARK MTORC1 SIGNALING; (M5926)HALLMARK MYC TARGETS V1	0.0	0.0	0.0	0.0	0.0	0.0	1.0	0.0	0.0	0.0	0.0	0.0	0.0	0.0	0.0	0.0	0.0	1.0	0.0	0.0
MORF4L1	10933	symbol	H. sapiens	10933	H. sapiens	MORF4L1	mortality factor 4 like 1	GO:0043968 histone H2A acetylation;GO:1905168 positive regulation of double-strand break repair via homologous recombination;GO:0016575 histone deacetylation		Predicted intracellular proteins	Nuclear speckles (Supported)				0.0	0.0	0.0	0.0	0.0	0.0	0.0	0.0	0.0	0.0	0.0	0.0	0.0	0.0	0.0	1.0	0.0	0.0	0.0	0.0
MOSPD2	158747	symbol	H. sapiens	158747	H. sapiens	MOSPD2	motile sperm domain containing 2	GO:0090026 positive regulation of monocyte chemotaxis;GO:0090023 positive regulation of neutrophil chemotaxis;GO:0071624 positive regulation of granulocyte chemotaxis		Predicted intracellular proteins	Endoplasmic reticulum (Supported)				0.0	0.0	0.0	0.0	0.0	0.0	0.0	0.0	0.0	0.0	0.0	0.0	0.0	0.0	0.0	0.0	0.0	0.0	0.0	0.0
ZC3H7A	29066	symbol	H. sapiens	29066	H. sapiens	ZC3H7A	zinc finger CCCH-type containing 7A	GO:0035196 production of miRNAs involved in gene silencing by miRNA;GO:0031050 dsRNA processing;GO:0070918 production of small RNA involved in gene silencing by RNA		Predicted intracellular proteins	Cytosol (Supported)				0.0	0.0	0.0	0.0	0.0	0.0	0.0	0.0	0.0	0.0	0.0	1.0	0.0	0.0	0.0	0.0	0.0	0.0	0.0	0.0
PROC	5624	symbol	H. sapiens	5624	H. sapiens	PROC	protein C, inactivator of coagulation factors Va and VIIIa	GO:1901552 positive regulation of endothelial cell development;GO:1903142 positive regulation of establishment of endothelial barrier;GO:1901550 regulation of endothelial cell development		Human disease related genes:Cardiovascular diseases:Vascular diseases; FDA approved drug targets:Small molecule drugs; Candidate cardiovascular disease genes; Cancer-related genes:Candidate cancer biomarkers; ENZYME proteins:Hydrolases; Human disease related genes:Cardiovascular diseases:Hematologic diseases; Predicted secreted proteins; FDA approved drug targets:Biotech drugs; Disease related ge…		Menadione; Sodium tetradecyl sulfate; Cupric Chloride; Kappadione; Protein S human	(M169)PID INTEGRIN2 PATHWAY	(M5946)HALLMARK COAGULATION	0.0	0.0	0.0	0.0	0.0	0.0	0.0	0.0	0.0	0.0	0.0	0.0	0.0	0.0	0.0	0.0	0.0	1.0	0.0	0.0
PAQR5	54852	symbol	H. sapiens	54852	H. sapiens	PAQR5	progestin and adipoQ receptor family member 5	GO:0048477 oogenesis;GO:0007292 female gamete generation;GO:0007281 germ cell development			Vesicles (Approved)				0.0	0.0	0.0	0.0	0.0	0.0	0.0	0.0	0.0	0.0	0.0	0.0	0.0	0.0	0.0	0.0	0.0	0.0	0.0	0.0
MMP2	4313	symbol	H. sapiens	4313	H. sapiens	MMP2	matrix metallopeptidase 2	GO:0014012 peripheral nervous system axon regeneration;GO:0001957 intramembranous ossification;GO:0036072 direct ossification		Candidate cardiovascular disease genes; Cancer-related genes:Candidate cancer biomarkers; ENZYME proteins:Hydrolases; Predicted secreted proteins; Human disease related genes:Cancers:Cancers of male genital organs; Cancer-related genes:Mutational cancer driver genes; Peptidases:Metallopeptidases; Human disease related genes:Cancers:Cancers of the breast and female genital organs; Human disease re…	Vesicles (Approved)	Marimastat; Captopril; SC-74020; Halofuginone; AE-941; Endostatin	(M63)PID AVB3 OPN PATHWAY; (M240)PID SYNDECAN 2 PATHWAY; (M65)PID FRA PATHWAY	(M5946)HALLMARK COAGULATION; (M5902)HALLMARK APOPTOSIS; (M5915)HALLMARK APICAL JUNCTION	1.0	1.0	1.0	0.0	0.0	1.0	1.0	0.0	1.0	1.0	0.0	0.0	0.0	1.0	0.0	0.0	0.0	1.0	0.0	0.0
GSAP	54103	symbol	H. sapiens	54103	H. sapiens	GSAP	gamma-secretase activating protein	GO:1902004 positive regulation of amyloid-beta formation;GO:1902993 positive regulation of amyloid precursor protein catabolic process;GO:1902003 regulation of amyloid-beta formation		Predicted intracellular proteins	Vesicles (Approved)				0.0	0.0	0.0	0.0	0.0	0.0	0.0	0.0	0.0	0.0	0.0	0.0	0.0	0.0	0.0	0.0	0.0	0.0	0.0	0.0
TXNDC12	51060	symbol	H. sapiens	51060	H. sapiens	TXNDC12	thioredoxin domain containing 12	GO:1902236 negative regulation of endoplasmic reticulum stress-induced intrinsic apoptotic signaling pathway;GO:1902235 regulation of endoplasmic reticulum stress-induced intrinsic apoptotic signaling pathway;GO:1903573 negative regulation of response to endoplasmic reticulum stress		Enzymes; Predicted intracellular proteins; ENZYME proteins:Oxidoreductases					0.0	0.0	0.0	0.0	1.0	0.0	0.0	0.0	0.0	0.0	0.0	0.0	0.0	0.0	0.0	0.0	0.0	0.0	0.0	0.0
ACKR3	57007	symbol	H. sapiens	57007	H. sapiens	ACKR3	atypical chemokine receptor 3	GO:1905320 regulation of mesenchymal stem cell migration;GO:1905322 positive regulation of mesenchymal stem cell migration;GO:0021557 oculomotor nerve development		G-protein coupled receptors:GPCRs excl olfactory receptors; Cancer-related genes; G-protein coupled receptors:Chemokines and chemotactic factors receptors	Plasma membrane;Vesicles (Supported)			(M5890)HALLMARK TNFA SIGNALING VIA NFKB; (M5891)HALLMARK HYPOXIA	0.0	0.0	0.0	0.0	1.0	0.0	0.0	0.0	1.0	0.0	0.0	0.0	0.0	0.0	0.0	0.0	0.0	1.0	0.0	0.0
CLIP1	6249	symbol	H. sapiens	6249	H. sapiens	CLIP1	CAP-Gly domain containing linker protein 1	GO:0031116 positive regulation of microtubule polymerization;GO:0031112 positive regulation of microtubule polymerization or depolymerization;GO:0031113 regulation of microtubule polymerization		Predicted intracellular proteins; Cancer-related genes:Mutational cancer driver genes; Cancer-related genes:Candidate cancer biomarkers	Cytosol;Microtubule ends (Supported)		(M163)PID LIS1 PATHWAY; (M121)PID MTOR 4PATHWAY	(M5893)HALLMARK MITOTIC SPINDLE	0.0	0.0	0.0	0.0	0.0	0.0	0.0	0.0	0.0	0.0	0.0	0.0	0.0	0.0	0.0	0.0	0.0	0.0	1.0	0.0
UPF2	26019	symbol	H. sapiens	26019	H. sapiens	UPF2	UPF2 regulator of nonsense mediated mRNA decay	GO:0000184 nuclear-transcribed mRNA catabolic process, nonsense-mediated decay;GO:0006406 mRNA export from nucleus;GO:0031100 animal organ regeneration		Predicted intracellular proteins	Cytosol (Supported); Additional: Cytoplasmic bodies				0.0	0.0	1.0	0.0	0.0	0.0	0.0	0.0	0.0	0.0	0.0	0.0	0.0	0.0	0.0	0.0	0.0	0.0	0.0	0.0
CDA	978	symbol	H. sapiens	978	H. sapiens	CDA	cytidine deaminase	GO:0071217 cellular response to external biotic stimulus;GO:0019858 cytosine metabolic process;GO:0046898 response to cycloheximide		Enzymes; ENZYME proteins:Hydrolases; FDA approved drug targets:Small molecule drugs; Predicted intracellular proteins	Nucleoplasm (Approved)	1-Beta-Ribofuranosyl-1,3-Diazepinone		(M5898)HALLMARK DNA REPAIR; (M5921)HALLMARK COMPLEMENT; (M5934)HALLMARK XENOBIOTIC METABOLISM	0.0	1.0	0.0	0.0	0.0	0.0	0.0	0.0	0.0	0.0	0.0	0.0	0.0	0.0	0.0	0.0	0.0	0.0	0.0	0.0
PSG10P	653492	symbol	H. sapiens	653492	H. sapiens	PSG10P	pregnancy specific beta-1-glycoprotein 10, pseudogene								0.0	0.0	0.0	0.0	0.0	0.0	0.0	0.0	0.0	0.0	0.0	0.0	0.0	0.0	0.0	0.0	0.0	0.0	0.0	0.0
PPFIA4	8497	symbol	H. sapiens	8497	H. sapiens	PPFIA4	PTPRF interacting protein alpha 4	GO:0050808 synapse organization;GO:0034330 cell junction organization;GO:0016043 cellular component organization		Predicted intracellular proteins				(M5891)HALLMARK HYPOXIA; (M5909)HALLMARK MYOGENESIS; (M5937)HALLMARK GLYCOLYSIS	0.0	0.0	0.0	0.0	0.0	0.0	0.0	0.0	0.0	0.0	0.0	0.0	0.0	0.0	0.0	0.0	0.0	0.0	0.0	1.0
CD72	971	symbol	H. sapiens	971	H. sapiens	CD72	CD72 molecule	GO:0007155 cell adhesion;GO:0022610 biological adhesion;GO:0009987 cellular process		Predicted intracellular proteins; CD markers	Mitochondria;Nucleoplasm (Approved)		(M10)PID BCR 5PATHWAY		0.0	0.0	0.0	0.0	0.0	0.0	0.0	0.0	0.0	0.0	0.0	0.0	0.0	0.0	0.0	0.0	0.0	0.0	0.0	0.0
MAOA	4128	symbol	H. sapiens	4128	H. sapiens	MAOA	monoamine oxidase A	GO:0019614 catechol-containing compound catabolic process;GO:0042420 dopamine catabolic process;GO:0042424 catecholamine catabolic process		FDA approved drug targets:Small molecule drugs; Human disease related genes:Other diseases:Mental and behavioural disorders; ENZYME proteins:Oxidoreductases; Human disease related genes:Congenital disorders of metabolism:Congenital disorders of amino acid metabolism; Disease related genes; Enzymes	Mitochondria (Supported); Additional: Cytosol	Amphetamine; Phentermine; Procaine; Tranylcypromine; Phenelzine; Minaprine; Zonisamide; Selegiline; Procarbazine; Moclobemide; Isocarboxazid; Ephedra sinica root; MMDA; 4-Methoxyamphetamine; Metamfetamine; Pargyline; Flavin adenine dinucleotide; Clorgiline; Nialamide; Nomifensine; Zimelidine; Posizolid; CX157; Decyl(dimethyl)phosphine oxide; Harmine; Pirlindole; Toloxatone; Brofaromine; Flortauci…		(M5935)HALLMARK FATTY ACID METABOLISM; (M5941)HALLMARK UV RESPONSE UP; (M5934)HALLMARK XENOBIOTIC METABOLISM	1.0	0.0	0.0	0.0	0.0	0.0	0.0	0.0	0.0	0.0	0.0	0.0	0.0	0.0	1.0	0.0	0.0	1.0	0.0	1.0
PMP22	5376	symbol	H. sapiens	5376	H. sapiens	PMP22	peripheral myelin protein 22	GO:0032060 bleb assembly;GO:0032288 myelin assembly;GO:0007422 peripheral nervous system development		Human disease related genes:Nervous system diseases:Other nervous and sensory system diseases; Cancer-related genes:Candidate cancer biomarkers; Predicted intracellular proteins; Disease related genes; Potential drug targets; Transporters:Transporter channels and pores; Human disease related genes:Nervous system diseases:Neurodegenerative diseases			(M239)PID A6B1 A6B4 INTEGRIN PATHWAY	(M5942)HALLMARK UV RESPONSE DN; (M5930)HALLMARK EPITHELIAL MESENCHYMAL TRANSITION	0.0	0.0	0.0	0.0	0.0	0.0	0.0	0.0	0.0	0.0	0.0	0.0	0.0	0.0	0.0	0.0	1.0	0.0	0.0	0.0
HSP90B1	7184	symbol	H. sapiens	7184	H. sapiens	HSP90B1	heat shock protein 90 beta family member 1	GO:0031247 actin rod assembly;GO:0051208 sequestering of calcium ion;GO:0034975 protein folding in endoplasmic reticulum		Predicted intracellular proteins; Cancer-related genes:Candidate cancer biomarkers	Endoplasmic reticulum (Enhanced)	Rifabutin; 2-Chlorodideoxyadenosine; Geldanamycin; Diglyme; N-Ethyl-5'-Carboxamido Adenosine; Radicicol; METHYL 3-CHLORO-2-{3-[(2,5-DIHYDROXY-4-METHOXYPHENYL)AMINO]-3-OXOPROPYL}-4,6-DIHYDROXYBENZOATE; 2-(3-AMINO-2,5,6-TRIMETHOXYPHENYL)ETHYL 5-CHLORO-2,4-DIHYDROXYBENZOATE; Copper	(M183)PID IL6 7 PATHWAY	(M5923)HALLMARK PI3K AKT MTOR SIGNALING; (M5922)HALLMARK UNFOLDED PROTEIN RESPONSE; (M5924)HALLMARK MTORC1 SIGNALING	1.0	1.0	0.0	0.0	0.0	0.0	1.0	0.0	0.0	0.0	0.0	0.0	1.0	0.0	0.0	0.0	0.0	1.0	1.0	0.0
LOC101928370	101928370	Gene_ID	H. sapiens	101928370	H. sapiens	S1PR1-DT	S1PR1 divergent transcript								0.0	0.0	0.0	0.0	0.0	0.0	0.0	0.0	0.0	0.0	0.0	0.0	0.0	0.0	0.0	0.0	0.0	0.0	0.0	0.0
STARD5	80765	symbol	H. sapiens	80765	H. sapiens	STARD5	StAR related lipid transfer domain containing 5	GO:0035376 sterol import;GO:0070508 cholesterol import;GO:0120009 intermembrane lipid transfer		Predicted intracellular proteins	Vesicles (Approved); Additional: Cytosol				0.0	0.0	0.0	0.0	0.0	0.0	0.0	0.0	0.0	0.0	0.0	0.0	0.0	0.0	0.0	0.0	0.0	0.0	0.0	0.0
CHD1L	9557	symbol	H. sapiens	9557	H. sapiens	CHD1L	chromodomain helicase DNA binding protein 1 like	GO:0032508 DNA duplex unwinding;GO:0032392 DNA geometric change;GO:0006338 chromatin remodeling		Enzymes; ENZYME proteins:Hydrolases; Predicted intracellular proteins	Nucleoplasm (Supported)				0.0	0.0	0.0	0.0	0.0	0.0	0.0	0.0	0.0	0.0	0.0	0.0	0.0	0.0	0.0	0.0	0.0	0.0	0.0	0.0
AGO4	192670	symbol	H. sapiens	192670	H. sapiens	AGO4	argonaute RISC component 4	GO:0035280 miRNA loading onto RISC involved in gene silencing by miRNA;GO:0010501 RNA secondary structure unwinding;GO:0070922 small RNA loading onto RISC		Predicted intracellular proteins	Cytoplasmic bodies (Supported); Additional: Cytosol			(M5898)HALLMARK DNA REPAIR	0.0	0.0	0.0	0.0	0.0	1.0	0.0	0.0	0.0	0.0	0.0	1.0	0.0	0.0	1.0	0.0	0.0	0.0	0.0	0.0
ASPA	443	symbol	H. sapiens	443	H. sapiens	ASPA	aspartoacylase	GO:0006533 aspartate catabolic process;GO:0006531 aspartate metabolic process;GO:0009068 aspartate family amino acid catabolic process		ENZYME proteins:Hydrolases; Predicted intracellular proteins; Human disease related genes:Congenital disorders of metabolism:Congenital disorders of amino acid metabolism; Disease related genes; Potential drug targets; Enzymes; Human disease related genes:Nervous system diseases:Neurodegenerative diseases	Cytosol (Supported)	Aspartic acid; Zinc; Zinc acetate; Zinc chloride; Zinc sulfate, unspecified form			0.0	0.0	0.0	0.0	0.0	0.0	0.0	0.0	0.0	0.0	0.0	0.0	0.0	0.0	0.0	0.0	0.0	0.0	0.0	0.0
ARL6IP1	23204	symbol	H. sapiens	23204	H. sapiens	ARL6IP1	ADP ribosylation factor like GTPase 6 interacting protein 1	GO:0002038 positive regulation of L-glutamate import across plasma membrane;GO:0071787 endoplasmic reticulum tubular network formation;GO:1990809 endoplasmic reticulum tubular network membrane organization		Predicted intracellular proteins; Disease related genes; Human disease related genes:Nervous system diseases:Other nervous and sensory system diseases	Endoplasmic reticulum (Approved)			(M5898)HALLMARK DNA REPAIR	0.0	0.0	0.0	0.0	0.0	0.0	0.0	0.0	0.0	0.0	0.0	0.0	0.0	0.0	0.0	1.0	0.0	0.0	0.0	0.0
LVCAT1	100506827	gene_synonym	H. sapiens	100506827	H. sapiens	LINC02475	long intergenic non-protein coding RNA 2475								0.0	0.0	0.0	0.0	0.0	0.0	0.0	0.0	0.0	0.0	0.0	0.0	0.0	0.0	0.0	0.0	0.0	0.0	0.0	0.0
PTPN12	5782	symbol	H. sapiens	5782	H. sapiens	PTPN12	protein tyrosine phosphatase non-receptor type 12	GO:2000587 negative regulation of platelet-derived growth factor receptor-beta signaling pathway;GO:2000586 regulation of platelet-derived growth factor receptor-beta signaling pathway;GO:0010642 negative regulation of platelet-derived growth factor receptor signaling pathway		Enzymes; ENZYME proteins:Hydrolases; Predicted intracellular proteins	Cytosol;Plasma membrane (Approved)	Tiludronic acid			1.0	0.0	1.0	0.0	0.0	0.0	0.0	0.0	0.0	0.0	0.0	0.0	0.0	0.0	1.0	0.0	0.0	0.0	0.0	0.0
ENPP5	59084	symbol	H. sapiens	59084	H. sapiens	ENPP5	ectonucleotide pyrophosphatase/phosphodiesterase family member 5	GO:0007154 cell communication;GO:0009987 cellular process;GO:0008150 biological_process			Cytosol (Approved); Additional: Nucleoplasm				0.0	0.0	0.0	0.0	0.0	0.0	0.0	0.0	0.0	0.0	0.0	0.0	0.0	0.0	0.0	0.0	0.0	0.0	0.0	0.0
CNKSR2	22866	symbol	H. sapiens	22866	H. sapiens	CNKSR2	connector enhancer of kinase suppressor of Ras 2	GO:0099173 postsynapse organization;GO:0050808 synapse organization;GO:0034330 cell junction organization		Predicted intracellular proteins; Human disease related genes:Other diseases:Mental and behavioural disorders; Disease related genes	Golgi apparatus;Plasma membrane (Approved)				0.0	0.0	0.0	0.0	0.0	0.0	0.0	0.0	0.0	0.0	0.0	0.0	0.0	0.0	0.0	0.0	0.0	0.0	0.0	0.0
MIS18BP1	55320	symbol	H. sapiens	55320	H. sapiens	MIS18BP1	MIS18 binding protein 1	GO:0051301 cell division;GO:0007049 cell cycle;GO:0009987 cellular process		Predicted intracellular proteins	Nucleoli (Approved); Additional: Cytosol				0.0	0.0	0.0	0.0	0.0	0.0	0.0	0.0	0.0	0.0	0.0	0.0	0.0	0.0	0.0	0.0	0.0	0.0	0.0	0.0

## Sheet: Enrichment
GroupID	Category	Term	Description	LogP	Log(q-value)	InTerm_InList	Genes	Symbols
1_Summary	Reactome Gene Sets	R-HSA-1280215	Cytokine Signaling in Immune system	-3.71234	-0.146743	13/715	815,2308,3556,4128,4313,4600,4939,5782,7184,11213,23650,58985,257397,3316	CAMK2A,FOXO1,IL1RAP,MAOA,MMP2,MX2,OAS2,PTPN12,HSP90B1,IRAK3,TRIM29,IL22RA1,TAB3,HSPB2
1_Member	Reactome Gene Sets	R-HSA-1280215	Cytokine Signaling in Immune system	-3.71234	-0.146743	13/715	815,2308,3556,4128,4313,4600,4939,5782,7184,11213,23650,58985,257397	CAMK2A,FOXO1,IL1RAP,MAOA,MMP2,MX2,OAS2,PTPN12,HSP90B1,IRAK3,TRIM29,IL22RA1,TAB3
1_Member	WikiPathways	WP195	IL-1 signaling pathway	-3.53813	-0.146743	4/57	3316,3556,11213,257397	HSPB2,IL1RAP,IRAK3,TAB3
1_Member	Reactome Gene Sets	R-HSA-449147	Signaling by Interleukins	-2.92902	-0.0250819	9/462	2308,3556,4128,4313,5782,7184,11213,58985,257397	FOXO1,IL1RAP,MAOA,MMP2,PTPN12,HSP90B1,IRAK3,IL22RA1,TAB3
1_Member	Reactome Gene Sets	R-HSA-446652	Interleukin-1 family signaling	-2.09303	0	4/141	3556,5782,11213,257397	IL1RAP,PTPN12,IRAK3,TAB3
2_Summary	GO Biological Processes	GO:0043065	positive regulation of apoptotic process	-3.70892	-0.146743	11/529	220,815,2308,2923,3676,4313,6423,8462,23621,26355,84069,5166,7184,10681,978,55846	ALDH1A3,CAMK2A,FOXO1,PDIA3,ITGA4,MMP2,SFRP2,KLF11,BACE1,FAM162A,PLEKHN1,PDK4,HSP90B1,GNB5,CDA,ITFG2
2_Member	GO Biological Processes	GO:0043065	positive regulation of apoptotic process	-3.70892	-0.146743	11/529	220,815,2308,2923,3676,4313,6423,8462,23621,26355,84069	ALDH1A3,CAMK2A,FOXO1,PDIA3,ITGA4,MMP2,SFRP2,KLF11,BACE1,FAM162A,PLEKHN1
2_Member	GO Biological Processes	GO:0043068	positive regulation of programmed cell death	-3.61184	-0.146743	11/543	220,815,2308,2923,3676,4313,6423,8462,23621,26355,84069	ALDH1A3,CAMK2A,FOXO1,PDIA3,ITGA4,MMP2,SFRP2,KLF11,BACE1,FAM162A,PLEKHN1
2_Member	GO Biological Processes	GO:0010942	positive regulation of cell death	-3.22448	-0.121415	11/604	220,815,2308,2923,3676,4313,6423,8462,23621,26355,84069	ALDH1A3,CAMK2A,FOXO1,PDIA3,ITGA4,MMP2,SFRP2,KLF11,BACE1,FAM162A,PLEKHN1
2_Member	GO Biological Processes	GO:0071417	cellular response to organonitrogen compound	-2.30622	0	9/573	815,2308,3676,4313,5166,7184,8462,10681,23621	CAMK2A,FOXO1,ITGA4,MMP2,PDK4,HSP90B1,KLF11,GNB5,BACE1
2_Member	GO Biological Processes	GO:1901653	cellular response to peptide	-2.17991	0	6/298	815,2308,3676,5166,8462,23621	CAMK2A,FOXO1,ITGA4,PDK4,KLF11,BACE1
2_Member	GO Biological Processes	GO:0071496	cellular response to external stimulus	-2.15945	0	6/301	978,2308,3676,5166,6423,55846	CDA,FOXO1,ITGA4,PDK4,SFRP2,ITFG2
2_Member	GO Biological Processes	GO:1901699	cellular response to nitrogen compound	-2.03993	0	9/632	815,2308,3676,4313,5166,7184,8462,10681,23621	CAMK2A,FOXO1,ITGA4,MMP2,PDK4,HSP90B1,KLF11,GNB5,BACE1
3_Summary	GO Biological Processes	GO:0014850	response to muscle activity	-3.68049	-0.146743	3/21	825,2660,84808,4313,4815,5782,26019	CAPN3,MSTN,PERM1,MMP2,NINJ2,PTPN12,UPF2
3_Member	GO Biological Processes	GO:0014850	response to muscle activity	-3.68049	-0.146743	3/21	825,2660,84808	CAPN3,MSTN,PERM1
3_Member	GO Biological Processes	GO:0014823	response to activity	-3.31911	-0.121415	4/65	825,2660,4313,84808	CAPN3,MSTN,MMP2,PERM1
3_Member	GO Biological Processes	GO:0031099	regeneration	-2.83551	0	5/148	2660,4313,4815,5782,26019	MSTN,MMP2,NINJ2,PTPN12,UPF2
3_Member	GO Biological Processes	GO:0042246	tissue regeneration	-2.35945	0	3/59	2660,4815,5782	MSTN,NINJ2,PTPN12
4_Summary	KEGG Pathway	hsa04750	Inflammatory mediator regulation of TRP channels	-3.64944	-0.146743	5/98	815,3556,8605,8989,162514	CAMK2A,IL1RAP,PLA2G4C,TRPA1,TRPV3
4_Member	KEGG Pathway	hsa04750	Inflammatory mediator regulation of TRP channels	-3.64944	-0.146743	5/98	815,3556,8605,8989,162514	CAMK2A,IL1RAP,PLA2G4C,TRPA1,TRPV3
5_Summary	GO Biological Processes	GO:1902532	negative regulation of intracellular signal transduction	-3.61184	-0.146743	11/543	2308,2660,6423,6615,7009,11213,27342,51060,55846,57007,255082	FOXO1,MSTN,SFRP2,SNAI1,TMBIM6,IRAK3,RABGEF1,TXNDC12,ITFG2,ACKR3,CASC2
5_Member	GO Biological Processes	GO:1902532	negative regulation of intracellular signal transduction	-3.61184	-0.146743	11/543	2308,2660,6423,6615,7009,11213,27342,51060,55846,57007,255082	FOXO1,MSTN,SFRP2,SNAI1,TMBIM6,IRAK3,RABGEF1,TXNDC12,ITFG2,ACKR3,CASC2
5_Member	GO Biological Processes	GO:2001243	negative regulation of intrinsic apoptotic signaling pathway	-3.56853	-0.146743	5/102	6423,6615,7009,51060,57007	SFRP2,SNAI1,TMBIM6,TXNDC12,ACKR3
5_Member	GO Biological Processes	GO:1902230	negative regulation of intrinsic apoptotic signaling pathway in response to DNA damage	-3.21177	-0.121415	3/30	6423,6615,57007	SFRP2,SNAI1,ACKR3
5_Member	GO Biological Processes	GO:1902229	regulation of intrinsic apoptotic signaling pathway in response to DNA damage	-2.90831	-0.0250819	3/38	6423,6615,57007	SFRP2,SNAI1,ACKR3
5_Member	GO Biological Processes	GO:2001242	regulation of intrinsic apoptotic signaling pathway	-2.56206	0	5/171	6423,6615,7009,51060,57007	SFRP2,SNAI1,TMBIM6,TXNDC12,ACKR3
5_Member	GO Biological Processes	GO:2001234	negative regulation of apoptotic signaling pathway	-2.04773	0	5/227	6423,6615,7009,51060,57007	SFRP2,SNAI1,TMBIM6,TXNDC12,ACKR3
6_Summary	Reactome Gene Sets	R-HSA-9006931	Signaling by Nuclear Receptors	-3.54659	-0.146743	8/299	220,4313,5166,5885,7764,10681,55818,192670	ALDH1A3,MMP2,PDK4,RAD21,ZNF217,GNB5,KDM3A,AGO4
6_Member	Reactome Gene Sets	R-HSA-9006931	Signaling by Nuclear Receptors	-3.54659	-0.146743	8/299	220,4313,5166,5885,7764,10681,55818,192670	ALDH1A3,MMP2,PDK4,RAD21,ZNF217,GNB5,KDM3A,AGO4
6_Member	Reactome Gene Sets	R-HSA-8939211	ESR-mediated signaling	-2.07905	0	5/223	4313,5885,7764,10681,192670	MMP2,RAD21,ZNF217,GNB5,AGO4
7_Summary	GO Biological Processes	GO:0070482	response to oxygen levels	-3.45122	-0.121415	8/309	768,2308,4313,5230,7184,10397,26355,84069,2113	CA9,FOXO1,MMP2,PGK1,HSP90B1,NDRG1,FAM162A,PLEKHN1,ETS1
7_Member	GO Biological Processes	GO:0070482	response to oxygen levels	-3.45122	-0.121415	8/309	768,2308,4313,5230,7184,10397,26355,84069	CA9,FOXO1,MMP2,PGK1,HSP90B1,NDRG1,FAM162A,PLEKHN1
7_Member	Canonical Pathways	M255	PID HIF1 TFPATHWAY	-3.29383	-0.121415	4/66	768,2113,5230,10397	CA9,ETS1,PGK1,NDRG1
7_Member	GO Biological Processes	GO:0001666	response to hypoxia	-3.04879	-0.029335	7/274	768,4313,5230,7184,10397,26355,84069	CA9,MMP2,PGK1,HSP90B1,NDRG1,FAM162A,PLEKHN1
7_Member	GO Biological Processes	GO:0036293	response to decreased oxygen levels	-2.93234	-0.0250819	7/287	768,4313,5230,7184,10397,26355,84069	CA9,MMP2,PGK1,HSP90B1,NDRG1,FAM162A,PLEKHN1
8_Summary	GO Biological Processes	GO:0002698	negative regulation of immune effector process	-3.38088	-0.121415	5/112	710,7009,10039,11213,27342,51704,135250	SERPING1,TMBIM6,PARP3,IRAK3,RABGEF1,GPRC5B,RAET1E
8_Member	GO Biological Processes	GO:0002698	negative regulation of immune effector process	-3.38088	-0.121415	5/112	710,7009,10039,11213,27342	SERPING1,TMBIM6,PARP3,IRAK3,RABGEF1
8_Member	GO Biological Processes	GO:0002701	negative regulation of production of molecular mediator of immune response	-2.90831	-0.0250819	3/38	7009,10039,11213	TMBIM6,PARP3,IRAK3
8_Member	GO Biological Processes	GO:0002697	regulation of immune effector process	-2.42867	0	7/353	710,7009,10039,11213,27342,51704,135250	SERPING1,TMBIM6,PARP3,IRAK3,RABGEF1,GPRC5B,RAET1E
9_Summary	GO Biological Processes	GO:0034097	response to cytokine	-3.25431	-0.121415	13/799	965,2057,2923,3556,3676,4313,4600,4939,10344,11213,55818,57007,58985,2660	CD58,EPOR,PDIA3,IL1RAP,ITGA4,MMP2,MX2,OAS2,CCL26,IRAK3,KDM3A,ACKR3,IL22RA1,MSTN
9_Member	GO Biological Processes	GO:0034097	response to cytokine	-3.25431	-0.121415	13/799	965,2057,2923,3556,3676,4313,4600,4939,10344,11213,55818,57007,58985	CD58,EPOR,PDIA3,IL1RAP,ITGA4,MMP2,MX2,OAS2,CCL26,IRAK3,KDM3A,ACKR3,IL22RA1
9_Member	GO Biological Processes	GO:0071345	cellular response to cytokine stimulus	-3.22268	-0.121415	12/703	965,2057,2923,3556,3676,4313,4939,10344,11213,55818,57007,58985	CD58,EPOR,PDIA3,IL1RAP,ITGA4,MMP2,OAS2,CCL26,IRAK3,KDM3A,ACKR3,IL22RA1
9_Member	GO Biological Processes	GO:0019221	cytokine-mediated signaling pathway	-2.43538	0	7/352	2057,3556,4939,10344,11213,57007,58985	EPOR,IL1RAP,OAS2,CCL26,IRAK3,ACKR3,IL22RA1
9_Member	KEGG Pathway	hsa04060	Cytokine-cytokine receptor interaction	-2.20064	0	6/295	2057,2660,3556,10344,57007,58985	EPOR,MSTN,IL1RAP,CCL26,ACKR3,IL22RA1
10_Summary	GO Biological Processes	GO:0003002	regionalization	-3.2456	-0.121415	8/332	2018,3215,3223,3224,6423,6615,10006,23322,23639,4313,51119	EMX2,HOXB5,HOXC6,HOXC8,SFRP2,SNAI1,ABI1,RPGRIP1L,DNAAF11,MMP2,SBDS
10_Member	GO Biological Processes	GO:0003002	regionalization	-3.2456	-0.121415	8/332	2018,3215,3223,3224,6423,6615,10006,23322	EMX2,HOXB5,HOXC6,HOXC8,SFRP2,SNAI1,ABI1,RPGRIP1L
10_Member	GO Biological Processes	GO:0007389	pattern specification process	-3.05594	-0.029335	9/443	2018,3215,3223,3224,6423,6615,10006,23322,23639	EMX2,HOXB5,HOXC6,HOXC8,SFRP2,SNAI1,ABI1,RPGRIP1L,DNAAF11
10_Member	GO Biological Processes	GO:0009952	anterior/posterior pattern specification	-2.92859	-0.0250819	6/210	2018,3215,3223,3224,6423,10006	EMX2,HOXB5,HOXC6,HOXC8,SFRP2,ABI1
10_Member	GO Biological Processes	GO:0001501	skeletal system development	-2.17412	0	8/495	3215,3223,3224,4313,6423,6615,10006,51119	HOXB5,HOXC6,HOXC8,MMP2,SFRP2,SNAI1,ABI1,SBDS
11_Summary	GO Biological Processes	GO:0098609	cell-cell adhesion	-3.07428	-0.029335	10/533	965,1366,3556,3676,4815,5271,23173,23650,54798,144100	CD58,CLDN7,IL1RAP,ITGA4,NINJ2,SERPINB8,METAP1,TRIM29,DCHS2,PLEKHA7
11_Member	GO Biological Processes	GO:0098609	cell-cell adhesion	-3.07428	-0.029335	10/533	965,1366,3556,3676,4815,5271,23173,23650,54798,144100	CD58,CLDN7,IL1RAP,ITGA4,NINJ2,SERPINB8,METAP1,TRIM29,DCHS2,PLEKHA7
12_Summary	GO Biological Processes	GO:0031050	dsRNA processing	-3.01324	-0.029335	3/35	29066,113802,192670	ZC3H7A,HENMT1,AGO4
12_Member	GO Biological Processes	GO:0031050	dsRNA processing	-3.01324	-0.029335	3/35	29066,113802,192670	ZC3H7A,HENMT1,AGO4
12_Member	GO Biological Processes	GO:0070918	production of small RNA involved in gene silencing by RNA	-3.01324	-0.029335	3/35	29066,113802,192670	ZC3H7A,HENMT1,AGO4
13_Summary	WikiPathways	WP3995	Prion disease pathway	-2.94226	-0.0250819	3/37	2923,5885,7184	PDIA3,RAD21,HSP90B1
13_Member	WikiPathways	WP3995	Prion disease pathway	-2.94226	-0.0250819	3/37	2923,5885,7184	PDIA3,RAD21,HSP90B1
14_Summary	GO Biological Processes	GO:0035987	endodermal cell differentiation	-2.81199	0	3/41	3676,4313,123169,23621,6615,6445,93589	ITGA4,MMP2,LEO1,BACE1,SNAI1,SGCG,CACNA2D4
14_Member	GO Biological Processes	GO:0035987	endodermal cell differentiation	-2.81199	0	3/41	3676,4313,123169	ITGA4,MMP2,LEO1
14_Member	GO Biological Processes	GO:0001706	endoderm formation	-2.5388	0	3/51	3676,4313,123169	ITGA4,MMP2,LEO1
14_Member	GO Biological Processes	GO:1904645	response to amyloid-beta	-2.44554	0	3/55	3676,4313,23621	ITGA4,MMP2,BACE1
14_Member	GO Biological Processes	GO:0001704	formation of primary germ layer	-2.41676	0	4/114	3676,4313,6615,123169	ITGA4,MMP2,SNAI1,LEO1
14_Member	GO Biological Processes	GO:0007492	endoderm development	-2.08603	0	3/74	3676,4313,123169	ITGA4,MMP2,LEO1
14_Member	WikiPathways	WP2118	Arrhythmogenic right ventricular cardiomyopathy	-2.05431	0	3/76	3676,6445,93589	ITGA4,SGCG,CACNA2D4
14_Member	KEGG Pathway	hsa05412	Arrhythmogenic right ventricular cardiomyopathy	-2.0388	0	3/77	3676,6445,93589	ITGA4,SGCG,CACNA2D4
15_Summary	WikiPathways	WP3298	Melatonin metabolism and effects	-2.78157	0	3/42	815,2308,4128,2113,8462,5782,10006,30011,10681,192670,4939,3556,6615,80243	CAMK2A,FOXO1,MAOA,ETS1,KLF11,PTPN12,ABI1,SH3KBP1,GNB5,AGO4,OAS2,IL1RAP,SNAI1,PREX2
15_Member	WikiPathways	WP3298	Melatonin metabolism and effects	-2.78157	0	3/42	815,2308,4128	CAMK2A,FOXO1,MAOA
15_Member	WikiPathways	WP23	B cell receptor signaling pathway	-2.65355	0	4/98	815,2113,2308,8462	CAMK2A,ETS1,FOXO1,KLF11
15_Member	WikiPathways	WP437	EGF/EGFR signaling pathway	-2.652	0	5/163	815,2308,5782,10006,30011	CAMK2A,FOXO1,PTPN12,ABI1,SH3KBP1
15_Member	Reactome Gene Sets	R-HSA-4086398	Ca2+ pathway	-2.29901	0	3/62	815,10681,192670	CAMK2A,GNB5,AGO4
15_Member	WikiPathways	WP4341	Non-genomic actions of 1,25 dihydroxyvitamin D3	-2.13546	0	3/71	815,2113,4939	CAMK2A,ETS1,OAS2
15_Member	Reactome Gene Sets	R-HSA-9006925	Intracellular signaling by second messengers	-2.10614	0	6/309	815,2308,3556,6615,80243,192670	CAMK2A,FOXO1,IL1RAP,SNAI1,PREX2,AGO4
16_Summary	GO Biological Processes	GO:0006612	protein targeting to membrane	-2.6375	0	4/99	23204,27342,64429,84885,2308,10933,10943	ARL6IP1,RABGEF1,ZDHHC6,ZDHHC12,FOXO1,MORF4L1,MSL3
16_Member	GO Biological Processes	GO:0006612	protein targeting to membrane	-2.6375	0	4/99	23204,27342,64429,84885	ARL6IP1,RABGEF1,ZDHHC6,ZDHHC12
16_Member	GO Biological Processes	GO:0043543	protein acylation	-2.4161	0	5/185	2308,10933,10943,64429,84885	FOXO1,MORF4L1,MSL3,ZDHHC6,ZDHHC12
17_Summary	WikiPathways	WP2064	Neural crest differentiation	-2.59043	0	4/102	2113,4855,5376,6615,30011	ETS1,NOTCH4,PMP22,SNAI1,SH3KBP1
17_Member	WikiPathways	WP2064	Neural crest differentiation	-2.59043	0	4/102	2113,4855,5376,6615	ETS1,NOTCH4,PMP22,SNAI1
17_Member	Canonical Pathways	M48	PID MET PATHWAY	-2.00845	0	3/79	2113,6615,30011	ETS1,SNAI1,SH3KBP1
18_Summary	Canonical Pathways	M92	PID ANGIOPOIETIN RECEPTOR PATHWAY	-2.58848	0	3/49	2113,2308,4313,4128,7184,813,4855,5230,10397,57007,5624,815,2057,10681	ETS1,FOXO1,MMP2,MAOA,HSP90B1,CALU,NOTCH4,PGK1,NDRG1,ACKR3,PROC,CAMK2A,EPOR,GNB5
18_Member	Canonical Pathways	M92	PID ANGIOPOIETIN RECEPTOR PATHWAY	-2.58848	0	3/49	2113,2308,4313	ETS1,FOXO1,MMP2
18_Member	Reactome Gene Sets	R-HSA-6785807	Interleukin-4 and Interleukin-13 signaling	-2.50083	0	4/108	2308,4128,4313,7184	FOXO1,MAOA,MMP2,HSP90B1
18_Member	WikiPathways	WP3888	VEGFA-VEGFR2 signaling pathway	-2.48191	0	8/439	813,2113,2308,4313,4855,5230,10397,57007	CALU,ETS1,FOXO1,MMP2,NOTCH4,PGK1,NDRG1,ACKR3
18_Member	Reactome Gene Sets	R-HSA-381426	Regulation of Insulin-like Growth Factor (IGF) transport and uptake by Insulin-like Growth Factor Binding Proteins (IGFBPs)	-2.27508	0	4/125	813,4313,5624,7184	CALU,MMP2,PROC,HSP90B1
18_Member	KEGG Pathway	hsa05200	Pathways in cancer	-2.00064	0	8/531	815,2057,2113,2308,4313,4855,7184,10681	CAMK2A,EPOR,ETS1,FOXO1,MMP2,NOTCH4,HSP90B1,GNB5
19_Summary	GO Biological Processes	GO:0097435	supramolecular fiber organization	-2.56983	0	9/522	825,2331,6249,6423,7184,10006,11075,23621,30011	CAPN3,FMOD,CLIP1,SFRP2,HSP90B1,ABI1,STMN2,BACE1,SH3KBP1
19_Member	GO Biological Processes	GO:0097435	supramolecular fiber organization	-2.56983	0	9/522	825,2331,6249,6423,7184,10006,11075,23621,30011	CAPN3,FMOD,CLIP1,SFRP2,HSP90B1,ABI1,STMN2,BACE1,SH3KBP1
20_Summary	Reactome Gene Sets	R-HSA-112310	Neurotransmitter release cycle	-2.5388	0	3/51	4128,8224,8497,815,23621,145270	MAOA,SYN3,PPFIA4,CAMK2A,BACE1,PRIMA1
20_Member	Reactome Gene Sets	R-HSA-112310	Neurotransmitter release cycle	-2.5388	0	3/51	4128,8224,8497	MAOA,SYN3,PPFIA4
20_Member	GO Biological Processes	GO:0001505	regulation of neurotransmitter levels	-2.17737	0	5/211	815,4128,8224,23621,145270	CAMK2A,MAOA,SYN3,BACE1,PRIMA1
