# Supplementary material for: Transcriptional profiling of Hutchinson-Gilford Progeria syndrome fibroblasts reveals deficits in mesenchymal stem cell commitment to differentiation related to early events in endochondral ossification
Source: eLife journal article supplement (doi:10.7554/elife.81290), 2022-12-29
Supplement: table2-data1 [file metascape_result.xlsx]

## Sheet: Annotation
MyList	Gene ID	Type	Tax ID	Homologene Gene ID	Homologene Gene Tax ID	Gene Symbol	Description	Biological Process (GO)	Kinase Class (UniProt)	Protein Function (Protein Atlas)	Subcellular Location (Protein Atlas)	Drug (DrugBank)	Canonical Pathways	Hallmark Gene Sets	GO:0007167 enzyme linked receptor protein	GO:0061061 muscle structure development	GO:0035239 tube morphogenesis	GO:0048729 tissue morphogenesis	GO:0030155 regulation of cell adhesion	hsa05200 Pathways in cancer	GO:0001934 positive regulation of protein	GO:0048863 stem cell differentiation	GO:0098609 cell-cell adhesion	GO:0000902 cell morphogenesis	GO:0051271 negative regulation of cellula	GO:0001501 skeletal system development	WP5087 Malignant pleural mesothelioma	GO:0010720 positive regulation of cell de	GO:0072001 renal system development	GO:0009612 response to mechanical stimulu	GO:0003206 cardiac chamber morphogenesis	GO:0048589 developmental growth	GO:0048872 homeostasis of number of cells	GO:0043065 positive regulation of apoptot
NTN4	59277	symbol	H. sapiens	59277	H. sapiens	NTN4	netrin 4	GO:0060668 regulation of branching involved in salivary gland morphogenesis by extracellular matrix-epithelial cell signaling;GO:0035426 extracellular matrix-cell signaling;GO:0060693 regulation of branching involved in salivary gland morphogenesis		Predicted intracellular proteins; Predicted secreted proteins; Cancer-related genes:Mutated cancer genes			(M5887)NABA BASEMENT MEMBRANES; (M3008)NABA ECM GLYCOPROTEINS; (M5884)NABA CORE MATRISOME		0.0	0.0	0.0	0.0	0.0	0.0	0.0	0.0	1.0	1.0	0.0	0.0	0.0	0.0	1.0	0.0	0.0	0.0	0.0	0.0
LYPD6B	130576	symbol	H. sapiens	130576	H. sapiens	LYPD6B	LY6/PLAUR domain containing 6B			Transporters:Accessory Factors Involved in Transport; Predicted intracellular proteins					0.0	0.0	0.0	0.0	0.0	0.0	0.0	0.0	0.0	0.0	0.0	0.0	0.0	0.0	0.0	0.0	0.0	0.0	0.0	0.0
LFNG	3955	symbol	H. sapiens	3955	H. sapiens	LFNG	LFNG O-fucosylpeptide 3-beta-N-acetylglucosaminyltransferase	GO:1902366 regulation of Notch signaling pathway involved in somitogenesis;GO:1902367 negative regulation of Notch signaling pathway involved in somitogenesis;GO:0007386 compartment pattern specification		Human disease related genes:Congenital malformations:Congenital malformations of the musculoskeletal system; Disease related genes; Potential drug targets; Enzymes; Predicted intracellular proteins; ENZYME proteins:Transferases	Golgi apparatus (Approved); Additional: Nuclear membrane			(M5903)HALLMARK NOTCH SIGNALING; (M5956)HALLMARK KRAS SIGNALING DN	0.0	0.0	0.0	1.0	0.0	0.0	0.0	0.0	0.0	0.0	0.0	0.0	0.0	0.0	0.0	0.0	1.0	0.0	1.0	0.0
JAG1	182	symbol	H. sapiens	182	H. sapiens	JAG1	jagged canonical Notch ligand 1	GO:0061444 endocardial cushion cell development;GO:0061443 endocardial cushion cell differentiation;GO:0061073 ciliary body morphogenesis		CD markers; Human disease related genes:Congenital malformations:Congenital malformations of the circulatory system; Human disease related genes:Congenital malformations:Congenital malformations of the digestive system; Disease related genes; Predicted intracellular proteins	Golgi apparatus;Plasma membrane (Approved)		(M256)PID TAP63 PATHWAY; (M17)PID NOTCH PATHWAY	(M5903)HALLMARK NOTCH SIGNALING; (M5944)HALLMARK ANGIOGENESIS; (M5895)HALLMARK WNT BETA CATENIN SIGNALING	0.0	1.0	1.0	1.0	1.0	1.0	0.0	1.0	0.0	0.0	1.0	0.0	0.0	0.0	1.0	0.0	1.0	0.0	1.0	0.0
LYPD6	130574	symbol	H. sapiens	130574	H. sapiens	LYPD6	LY6/PLAUR domain containing 6	GO:2000272 negative regulation of signaling receptor activity;GO:0090263 positive regulation of canonical Wnt signaling pathway;GO:0030177 positive regulation of Wnt signaling pathway		Predicted secreted proteins	Cytosol (Approved)				0.0	0.0	0.0	0.0	0.0	0.0	0.0	0.0	0.0	0.0	0.0	0.0	0.0	0.0	0.0	0.0	0.0	0.0	0.0	0.0
LHX9	56956	symbol	H. sapiens	56956	H. sapiens	LHX9	LIM homeobox 9	GO:0097380 dorsal spinal cord interneuron anterior axon guidance;GO:0097378 dorsal spinal cord interneuron axon guidance;GO:0035262 gonad morphogenesis		Transcription factors:Helix-turn-helix domains; Predicted intracellular proteins	Nucleoplasm (Approved)			(M5937)HALLMARK GLYCOLYSIS	0.0	0.0	0.0	0.0	0.0	1.0	0.0	0.0	0.0	1.0	0.0	0.0	0.0	0.0	0.0	0.0	0.0	0.0	0.0	0.0
FOXE1	2304	symbol	H. sapiens	2304	H. sapiens	FOXE1	forkhead box E1	GO:0060465 pharynx development;GO:0060023 soft palate development;GO:0060022 hard palate development		Human disease related genes:Endocrine and metabolic diseases:Thyroid gland diseases; Transcription factors:Helix-turn-helix domains; Predicted intracellular proteins; Disease related genes					0.0	0.0	0.0	1.0	0.0	0.0	0.0	0.0	0.0	0.0	0.0	1.0	0.0	0.0	1.0	0.0	0.0	0.0	1.0	0.0
CPA4	51200	symbol	H. sapiens	51200	H. sapiens	CPA4	carboxypeptidase A4	GO:0016573 histone acetylation;GO:0018393 internal peptidyl-lysine acetylation;GO:0006475 internal protein amino acid acetylation		Enzymes; Predicted secreted proteins; Predicted intracellular proteins; Peptidases:Metallopeptidases	Nucleoplasm (Approved); Additional: Centrosome;Cytosol				0.0	0.0	0.0	0.0	0.0	0.0	0.0	0.0	0.0	0.0	0.0	0.0	0.0	0.0	0.0	0.0	0.0	0.0	0.0	0.0
CITED2	10370	symbol	H. sapiens	10370	H. sapiens	CITED2	Cbp/p300 interacting transactivator with Glu/Asp rich carboxy-terminal domain 2	GO:0035802 adrenal cortex formation;GO:0038107 nodal signaling pathway involved in determination of left/right asymmetry;GO:1900094 regulation of transcription from RNA polymerase II promoter involved in determination of left/right symmetry		Predicted intracellular proteins; Human disease related genes:Congenital malformations:Congenital malformations of the circulatory system; Human disease related genes:Cardiovascular diseases:Cardiac diseases; Disease related genes	Nucleoplasm (Supported)		(M44)PID HIF2PATHWAY; (M255)PID HIF1 TFPATHWAY	(M5942)HALLMARK UV RESPONSE DN; (M5891)HALLMARK HYPOXIA; (M5937)HALLMARK GLYCOLYSIS	1.0	1.0	1.0	1.0	1.0	1.0	0.0	1.0	0.0	0.0	1.0	1.0	0.0	0.0	1.0	1.0	1.0	0.0	1.0	0.0
ANK1	286	symbol	H. sapiens	286	H. sapiens	ANK1	ankyrin 1	GO:0035090 maintenance of apical/basal cell polarity;GO:0045199 maintenance of epithelial cell apical/basal polarity;GO:0030011 maintenance of cell polarity		Transporters:Accessory Factors Involved in Transport; Human disease related genes:Cardiovascular diseases:Hematologic diseases; Disease related genes; Potential drug targets; Predicted intracellular proteins				(M5945)HALLMARK HEME METABOLISM	0.0	0.0	0.0	0.0	0.0	0.0	0.0	0.0	0.0	1.0	0.0	0.0	0.0	0.0	0.0	0.0	0.0	0.0	0.0	0.0
ARID5B	84159	symbol	H. sapiens	84159	H. sapiens	ARID5B	AT-rich interaction domain 5B	GO:0060613 fat pad development;GO:0010761 fibroblast migration;GO:0030325 adrenal gland development		Transcription factors:Helix-turn-helix domains; Cancer-related genes:Mutated cancer genes; Cancer-related genes:Mutational cancer driver genes; Disease related genes; Predicted intracellular proteins	Endoplasmic reticulum (Approved); Additional: Cytosol;Nucleoplasm;Plasma membrane			(M5908)HALLMARK ANDROGEN RESPONSE; (M5913)HALLMARK INTERFERON GAMMA RESPONSE	1.0	1.0	1.0	0.0	0.0	0.0	0.0	0.0	0.0	0.0	0.0	1.0	0.0	0.0	1.0	0.0	0.0	1.0	0.0	0.0
ITGA7	3679	symbol	H. sapiens	3679	H. sapiens	ITGA7	integrin subunit alpha 7	GO:0034113 heterotypic cell-cell adhesion;GO:0033627 cell adhesion mediated by integrin;GO:0035987 endodermal cell differentiation		Transporters:Accessory Factors Involved in Transport; Human disease related genes:Musculoskeletal diseases:Muscular diseases; Disease related genes; Potential drug targets; Predicted intracellular proteins	Plasma membrane (Approved); Additional: Nuclear speckles;Vesicles		(M47)PID INTEGRIN CS PATHWAY; (M67)PID ARF6 TRAFFICKING PATHWAY; (M18)PID INTEGRIN1 PATHWAY	(M5905)HALLMARK ADIPOGENESIS; (M5909)HALLMARK MYOGENESIS	0.0	1.0	0.0	1.0	0.0	0.0	0.0	0.0	1.0	0.0	0.0	0.0	1.0	0.0	0.0	0.0	0.0	0.0	0.0	0.0
TP53	7157	symbol	H. sapiens	7157	H. sapiens	TP53	tumor protein p53	GO:1903451 negative regulation of G1 to G0 transition;GO:1905856 negative regulation of pentose-phosphate shunt;GO:1990248 regulation of transcription from RNA polymerase II promoter in response to DNA damage		Human disease related genes:Cardiovascular diseases:Hematologic diseases; Human disease related genes:Cancers:Cancers of the breast and female genital organs; Human disease related genes:Musculoskeletal diseases:Skeletal diseases; Disease related genes; Transporters:Transporter channels and pores; Predicted intracellular proteins; Human disease related genes:Cancers:Head and neck cancers; Cancer-…	Nucleoplasm (Supported); Additional: Cytosol;Mitochondria	Acetylsalicylic acid; Zinc; Triethyl phosphate; AZD 3355; 1-(9-ethyl-9H-carbazol-3-yl)-N-methylmethanamine; Zinc acetate; Zinc chloride; Zinc sulfate, unspecified form	(M1529)SA G1 AND S PHASES; (M180)PID HIF1A PATHWAY; (M32)PID HDAC CLASSIII PATHWAY	(M5895)HALLMARK WNT BETA CATENIN SIGNALING; (M5898)HALLMARK DNA REPAIR; (M5925)HALLMARK E2F TARGETS	1.0	0.0	0.0	1.0	0.0	1.0	1.0	1.0	0.0	1.0	0.0	1.0	1.0	1.0	1.0	0.0	1.0	1.0	1.0	1.0
LIMS2	55679	symbol	H. sapiens	55679	H. sapiens	LIMS2	LIM zinc finger domain containing 2	GO:2000346 negative regulation of hepatocyte proliferation;GO:2001046 positive regulation of integrin-mediated signaling pathway;GO:2000345 regulation of hepatocyte proliferation		Predicted intracellular proteins; Human disease related genes:Musculoskeletal diseases:Muscular diseases; Disease related genes	Focal adhesion sites (Supported)		(M71)PID ILK PATHWAY		0.0	0.0	0.0	1.0	1.0	0.0	0.0	0.0	1.0	0.0	0.0	0.0	0.0	1.0	0.0	0.0	1.0	0.0	0.0	0.0
TUFT1	7286	symbol	H. sapiens	7286	H. sapiens	TUFT1	tuftelin 1	GO:0030282 bone mineralization;GO:0031214 biomineral tissue development;GO:0110148 biomineralization		Predicted secreted proteins; Predicted intracellular proteins	Vesicles (Approved)				0.0	0.0	0.0	0.0	0.0	0.0	0.0	0.0	0.0	0.0	0.0	0.0	0.0	0.0	0.0	0.0	1.0	0.0	0.0	0.0
MAP3K5	4217	symbol	H. sapiens	4217	H. sapiens	MAP3K5	mitogen-activated protein kinase kinase kinase 5	GO:0072577 endothelial cell apoptotic process;GO:0038066 p38MAPK cascade;GO:0010663 positive regulation of striated muscle cell apoptotic process	STE Ser/Thr protein kinase family	Enzymes; Kinases:STE Ser/Thr protein kinases; Predicted intracellular proteins; ENZYME proteins:Transferases	Cytosol (Supported)		(M20)PID P38 MKK3 6PATHWAY; (M197)PID HIV NEF PATHWAY; (M249)PID PI3KCI AKT PATHWAY		0.0	0.0	0.0	0.0	0.0	0.0	1.0	0.0	0.0	0.0	0.0	0.0	1.0	0.0	1.0	0.0	0.0	0.0	0.0	1.0
CARD10	29775	symbol	H. sapiens	29775	H. sapiens	CARD10	caspase recruitment domain family member 10	GO:0007250 activation of NF-kappaB-inducing kinase activity;GO:0038061 NIK/NF-kappaB signaling;GO:0090051 negative regulation of cell migration involved in sprouting angiogenesis		Predicted intracellular proteins	Intermediate filaments;Vesicles (Approved); Additional: Cytosol				0.0	0.0	0.0	0.0	0.0	0.0	1.0	0.0	0.0	0.0	1.0	0.0	0.0	0.0	0.0	0.0	0.0	0.0	0.0	0.0
CYFIP2	26999	symbol	H. sapiens	26999	H. sapiens	CYFIP2	cytoplasmic FMR1 interacting protein 2	GO:0051388 positive regulation of neurotrophin TRK receptor signaling pathway;GO:0097484 dendrite extension;GO:0051386 regulation of neurotrophin TRK receptor signaling pathway		Human disease related genes:Nervous system diseases:Epilepsy; Predicted intracellular proteins; Disease related genes	Endoplasmic reticulum (Approved); Additional: Cytosol;Plasma membrane		(M156)PID ECADHERIN NASCENT AJ PATHWAY; (M232)PID ECADHERIN STABILIZATION PATHWAY; (M278)PID RAC1 PATHWAY	(M5934)HALLMARK XENOBIOTIC METABOLISM; (M5939)HALLMARK P53 PATHWAY	1.0	0.0	0.0	1.0	0.0	0.0	0.0	0.0	1.0	1.0	0.0	0.0	0.0	0.0	0.0	0.0	0.0	1.0	0.0	0.0
PRSS12	8492	symbol	H. sapiens	8492	H. sapiens	PRSS12	serine protease 12	GO:0031638 zymogen activation;GO:0016485 protein processing;GO:0006887 exocytosis		Human disease related genes:Other diseases:Mental and behavioural disorders; Predicted secreted proteins; Disease related genes; Potential drug targets; Enzymes; Peptidases:Serine-type peptidases	Actin filaments (Approved); Additional: Nucleoplasm		(M3468)NABA ECM REGULATORS; (M5885)NABA MATRISOME ASSOCIATED; (M5889)NABA MATRISOME		0.0	0.0	0.0	0.0	0.0	0.0	0.0	0.0	0.0	0.0	0.0	0.0	0.0	0.0	0.0	0.0	1.0	0.0	0.0	0.0
ARNT2	9915	symbol	H. sapiens	9915	H. sapiens	ARNT2	aryl hydrocarbon receptor nuclear translocator 2	GO:0001666 response to hypoxia;GO:0036293 response to decreased oxygen levels;GO:0070482 response to oxygen levels		Human disease related genes:Congenital malformations:Other congenital malformations; Transcription factors:Basic domains; Predicted intracellular proteins; Disease related genes	Nucleoplasm (Supported)				0.0	0.0	0.0	1.0	0.0	1.0	0.0	0.0	0.0	0.0	0.0	0.0	0.0	0.0	0.0	0.0	0.0	0.0	0.0	0.0
HMGA2	8091	symbol	H. sapiens	8091	H. sapiens	HMGA2	high mobility group AT-hook 2	GO:0003131 mesodermal-endodermal cell signaling;GO:2000685 positive regulation of cellular response to X-ray;GO:2000683 regulation of cellular response to X-ray		Transcription factors:beta-Sheet binding to DNA; Human disease related genes:Reproductive system diseases:Reproductive system diseases; Cancer-related genes:Candidate cancer biomarkers; Disease related genes; Predicted intracellular proteins	Nucleoli;Nucleoli rim;Nucleoplasm (Supported)				0.0	0.0	0.0	1.0	0.0	1.0	1.0	1.0	0.0	0.0	0.0	1.0	0.0	0.0	1.0	0.0	0.0	0.0	0.0	1.0
FST	10468	symbol	H. sapiens	10468	H. sapiens	FST	follistatin	GO:0043616 keratinocyte proliferation;GO:0032926 negative regulation of activin receptor signaling pathway;GO:0051798 positive regulation of hair follicle development		Predicted secreted proteins; Predicted intracellular proteins; Candidate cardiovascular disease genes; Cancer-related genes:Candidate cancer biomarkers	Vesicles (Approved)	D-Myo-Inositol-Hexasulphate	(M181)PID BMP PATHWAY; (M5883)NABA SECRETED FACTORS; (M5885)NABA MATRISOME ASSOCIATED	(M5909)HALLMARK MYOGENESIS	1.0	0.0	0.0	1.0	0.0	1.0	0.0	0.0	0.0	0.0	0.0	1.0	0.0	0.0	1.0	0.0	1.0	0.0	1.0	0.0
CDC42EP3	10602	symbol	H. sapiens	10602	H. sapiens	CDC42EP3	CDC42 effector protein 3	GO:0031272 regulation of pseudopodium assembly;GO:0031274 positive regulation of pseudopodium assembly;GO:0030838 positive regulation of actin filament polymerization		Predicted intracellular proteins	Actin filaments;Plasma membrane (Supported)				0.0	0.0	0.0	0.0	0.0	0.0	0.0	0.0	0.0	0.0	0.0	0.0	0.0	1.0	0.0	0.0	0.0	0.0	0.0	0.0
BCAM	4059	symbol	H. sapiens	4059	H. sapiens	BCAM	basal cell adhesion molecule (Lutheran blood group)	GO:0007160 cell-matrix adhesion;GO:0031589 cell-substrate adhesion;GO:0007155 cell adhesion		Blood group antigen proteins; Predicted intracellular proteins; CD markers	Nucleoli fibrillar center (Approved)			(M5898)HALLMARK DNA REPAIR; (M5945)HALLMARK HEME METABOLISM	0.0	0.0	0.0	0.0	0.0	0.0	0.0	0.0	1.0	0.0	0.0	0.0	0.0	0.0	0.0	0.0	0.0	0.0	0.0	0.0
EBF1	1879	symbol	H. sapiens	1879	H. sapiens	EBF1	EBF transcription factor 1	GO:0006357 regulation of transcription by RNA polymerase II;GO:0006355 regulation of transcription, DNA-templated;GO:1903506 regulation of nucleic acid-templated transcription		Transcription factors:Immunoglobulin fold; Predicted intracellular proteins; Cancer-related genes	Nucleoplasm (Approved); Additional: Vesicles				0.0	0.0	0.0	0.0	0.0	0.0	0.0	0.0	0.0	0.0	0.0	0.0	0.0	0.0	1.0	0.0	0.0	0.0	0.0	0.0
PSEN2	5664	symbol	H. sapiens	5664	H. sapiens	PSEN2	presenilin 2	GO:0110097 regulation of calcium import into the mitochondrion;GO:1990456 mitochondrion-endoplasmic reticulum membrane tethering;GO:0034205 amyloid-beta formation		Human disease related genes:Cardiovascular diseases:Cardiac diseases; Peptidases:Aspartic-type peptidases; Disease related genes; Potential drug targets; Enzymes; Transporters:Transporter channels and pores; Human disease related genes:Nervous system diseases:Neurodegenerative diseases			(M87)PID LKB1 PATHWAY	(M5903)HALLMARK NOTCH SIGNALING; (M5895)HALLMARK WNT BETA CATENIN SIGNALING; (M5902)HALLMARK APOPTOSIS	1.0	0.0	0.0	0.0	0.0	0.0	0.0	0.0	0.0	1.0	0.0	0.0	0.0	0.0	0.0	0.0	0.0	0.0	0.0	0.0
LIF	3976	symbol	H. sapiens	3976	H. sapiens	LIF	LIF interleukin 6 family cytokine	GO:1901676 positive regulation of histone H3-K27 acetylation;GO:1901674 regulation of histone H3-K27 acetylation;GO:0072108 positive regulation of mesenchymal to epithelial transition involved in metanephros morphogenesis		Predicted secreted proteins; Predicted intracellular proteins; Cancer-related genes:Candidate cancer biomarkers	Cytosol (Supported)		(M65)PID FRA PATHWAY; (M145)PID P53 DOWNSTREAM PATHWAY; (M5883)NABA SECRETED FACTORS	(M5947)HALLMARK IL2 STAT5 SIGNALING; (M5890)HALLMARK TNFA SIGNALING VIA NFKB; (M5932)HALLMARK INFLAMMATORY RESPONSE	1.0	1.0	1.0	1.0	1.0	0.0	1.0	1.0	0.0	0.0	0.0	1.0	0.0	1.0	1.0	0.0	1.0	0.0	0.0	0.0
FAM212B	55924	gene_synonym	H. sapiens	55924	H. sapiens	INKA2	inka box actin regulator 2	GO:0043086 negative regulation of catalytic activity;GO:0044092 negative regulation of molecular function;GO:0050790 regulation of catalytic activity		Predicted intracellular proteins	Nucleoplasm (Supported); Additional: Nucleoli;Vesicles				0.0	0.0	0.0	0.0	0.0	0.0	0.0	0.0	0.0	0.0	0.0	0.0	0.0	0.0	0.0	0.0	0.0	0.0	0.0	0.0
CYP2U1	113612	symbol	H. sapiens	113612	H. sapiens	CYP2U1	cytochrome P450 family 2 subfamily U member 1	GO:0097267 omega-hydroxylase P450 pathway;GO:0019369 arachidonic acid metabolic process;GO:0033559 unsaturated fatty acid metabolic process		Human disease related genes:Nervous system diseases:Other nervous and sensory system diseases; ENZYME proteins:Oxidoreductases; Disease related genes; Potential drug targets; Enzymes	Golgi apparatus (Approved); Additional: Nucleoplasm;Vesicles				0.0	0.0	0.0	0.0	0.0	0.0	0.0	0.0	0.0	0.0	0.0	0.0	0.0	0.0	0.0	0.0	0.0	0.0	0.0	0.0
KCNH1	3756	symbol	H. sapiens	3756	H. sapiens	KCNH1	potassium voltage-gated channel subfamily H member 1	GO:0007520 myoblast fusion;GO:0000768 syncytium formation by plasma membrane fusion;GO:0140253 cell-cell fusion		Voltage-gated ion channels:Voltage-Gated Potassium Channels; Human disease related genes:Congenital malformations:Other congenital malformations; Disease related genes; Potential drug targets; Transporters:Transporter channels and pores; Predicted intracellular proteins	Vesicles (Supported)	Imipramine; Astemizole		(M5909)HALLMARK MYOGENESIS	0.0	1.0	0.0	0.0	0.0	0.0	0.0	0.0	0.0	0.0	0.0	0.0	0.0	0.0	0.0	0.0	0.0	0.0	0.0	0.0
F2RL2	2151	symbol	H. sapiens	2151	H. sapiens	F2RL2	coagulation factor II thrombin receptor like 2	GO:0070493 thrombin-activated receptor signaling pathway;GO:0051482 positive regulation of cytosolic calcium ion concentration involved in phospholipase C-activating G protein-coupled signaling pathway;GO:0035025 positive regulation of Rho protein signal transduction		G-protein coupled receptors:GPCRs excl olfactory receptors			(M138)PID THROMBIN PAR4 PATHWAY; (M193)PID NEPHRIN NEPH1 PATHWAY; (M238)PID THROMBIN PAR1 PATHWAY	(M5946)HALLMARK COAGULATION; (M5947)HALLMARK IL2 STAT5 SIGNALING	0.0	0.0	0.0	0.0	0.0	0.0	0.0	0.0	0.0	0.0	0.0	0.0	0.0	0.0	0.0	0.0	0.0	0.0	1.0	0.0
PTPRQ	374462	symbol	H. sapiens	374462	H. sapiens	PTPRQ	protein tyrosine phosphatase receptor type Q	GO:1990264 peptidyl-tyrosine dephosphorylation involved in inactivation of protein kinase activity;GO:0035335 peptidyl-tyrosine dephosphorylation;GO:0045598 regulation of fat cell differentiation		Human disease related genes:Nervous system diseases:Ear disease; Predicted intracellular proteins	Cytosol (Approved)				0.0	0.0	0.0	0.0	0.0	0.0	1.0	0.0	0.0	0.0	0.0	0.0	0.0	0.0	0.0	0.0	0.0	0.0	0.0	0.0
TGFB2	7042	symbol	H. sapiens	7042	H. sapiens	TGFB2	transforming growth factor beta 2	GO:1903701 substantia propria of cornea development;GO:0042704 uterine wall breakdown;GO:0062044 negative regulation of cardiac epithelial to mesenchymal transition		Human disease related genes:Immune system diseases:Allergies and autoimmune diseases; Cancer-related genes:Candidate cancer biomarkers; Human disease related genes:Congenital malformations:Congenital malformations of the circulatory system; Predicted secreted proteins; Disease related genes	Vesicles (Approved)		(M11736)SA MMP CYTOKINE CONNECTION; (M211)PID HEDGEHOG 2PATHWAY; (M33)PID GLYPICAN 1PATHWAY	(M5902)HALLMARK APOPTOSIS; (M5934)HALLMARK XENOBIOTIC METABOLISM; (M5950)HALLMARK ALLOGRAFT REJECTION	1.0	1.0	1.0	1.0	1.0	1.0	1.0	1.0	1.0	1.0	1.0	1.0	0.0	0.0	1.0	0.0	1.0	1.0	1.0	1.0
11-Sep						None	None	None	None	None	None	None	None	None	nan	nan	nan	nan	nan	nan	nan	nan	nan	nan	nan	nan	nan	nan	nan	nan	nan	nan	nan	nan
PCDH10	57575	symbol	H. sapiens	57575	H. sapiens	PCDH10	protocadherin 10	GO:0007156 homophilic cell adhesion via plasma membrane adhesion molecules;GO:0098742 cell-cell adhesion via plasma-membrane adhesion molecules;GO:0098609 cell-cell adhesion			Golgi apparatus (Approved); Additional: Nucleoplasm;Vesicles				0.0	0.0	0.0	0.0	0.0	0.0	0.0	0.0	1.0	1.0	0.0	0.0	0.0	0.0	0.0	0.0	0.0	0.0	0.0	0.0
STX6	10228	symbol	H. sapiens	10228	H. sapiens	STX6	syntaxin 6	GO:0016189 synaptic vesicle to endosome fusion;GO:0099532 synaptic vesicle endosomal processing;GO:0090161 Golgi ribbon formation		Transporters:Transporter channels and pores	Golgi apparatus (Enhanced); Additional: Nucleoplasm				0.0	0.0	0.0	0.0	0.0	0.0	0.0	0.0	0.0	0.0	0.0	0.0	0.0	0.0	0.0	0.0	0.0	0.0	0.0	0.0
NTRK2	4915	symbol	H. sapiens	4915	H. sapiens	NTRK2	neurotrophic receptor tyrosine kinase 2	GO:0099540 trans-synaptic signaling by neuropeptide;GO:0099551 trans-synaptic signaling by neuropeptide, modulating synaptic transmission;GO:0099538 synaptic signaling via neuropeptide	Tyr protein kinase family	Human disease related genes:Nervous system diseases:Epilepsy; FDA approved drug targets:Small molecule drugs; Cancer-related genes:Candidate cancer biomarkers; Human disease related genes:Cancers:Cancers of eye, brain, and central nervous system; Kinases:Tyr protein kinases; Disease related genes; Enzymes; RAS pathway related proteins; ENZYME proteins:Transferases	Plasma membrane (Supported)	Amitriptyline; Esketamine; Entrectinib; Fostamatinib; Larotrectinib	(M142)PID AJDISS 2PATHWAY; (M100)PID SHP2 PATHWAY; (M187)PID TRKR PATHWAY		1.0	0.0	1.0	1.0	0.0	0.0	1.0	0.0	0.0	0.0	0.0	0.0	1.0	1.0	0.0	0.0	1.0	0.0	1.0	0.0
KHDRBS3	10656	symbol	H. sapiens	10656	H. sapiens	KHDRBS3	KH RNA binding domain containing, signal transduction associated 3	GO:0000381 regulation of alternative mRNA splicing, via spliceosome;GO:0048024 regulation of mRNA splicing, via spliceosome;GO:0050684 regulation of mRNA processing		Predicted intracellular proteins	Nucleoplasm (Supported)				0.0	0.0	0.0	0.0	0.0	0.0	0.0	0.0	0.0	0.0	0.0	0.0	0.0	0.0	0.0	0.0	0.0	0.0	0.0	0.0
TOX	9760	symbol	H. sapiens	9760	H. sapiens	TOX	thymocyte selection associated high mobility group box	GO:0002364 NK T cell lineage commitment;GO:0043375 CD8-positive, alpha-beta T cell lineage commitment;GO:0002362 CD4-positive, CD25-positive, alpha-beta regulatory T cell lineage commitment		Transcription factors:Other all-alpha-helical DNA-binding domains; Predicted intracellular proteins	Nucleoli fibrillar center;Nucleoplasm (Approved)				0.0	0.0	0.0	0.0	1.0	0.0	0.0	0.0	0.0	0.0	0.0	0.0	0.0	1.0	1.0	0.0	0.0	0.0	1.0	0.0
XIST	7503	symbol	H. sapiens	7503	H. sapiens	XIST	X inactive specific transcript	GO:0009048 dosage compensation by inactivation of X chromosome;GO:0007549 dosage compensation;GO:0040029 regulation of gene expression, epigenetic						(M5935)HALLMARK FATTY ACID METABOLISM	0.0	0.0	0.0	0.0	0.0	0.0	0.0	0.0	0.0	0.0	0.0	0.0	0.0	0.0	0.0	0.0	0.0	0.0	0.0	0.0
BIRC3	330	symbol	H. sapiens	330	H. sapiens	BIRC3	baculoviral IAP repeat containing 3	GO:0070424 regulation of nucleotide-binding oligomerization domain containing signaling pathway;GO:0060546 negative regulation of necroptotic process;GO:0062099 negative regulation of programmed necrotic cell death		Cancer-related genes:Candidate cancer biomarkers; Disease related genes; Potential drug targets; Enzymes; Predicted intracellular proteins; ENZYME proteins:Transferases	Cytosol;Nucleoplasm (Supported)		(M7997)SA CASPASE CASCADE; (M45)PID CD40 PATHWAY; (M197)PID HIV NEF PATHWAY	(M5902)HALLMARK APOPTOSIS; (M5890)HALLMARK TNFA SIGNALING VIA NFKB; (M5953)HALLMARK KRAS SIGNALING UP	0.0	0.0	0.0	0.0	0.0	1.0	0.0	0.0	0.0	0.0	0.0	0.0	0.0	0.0	0.0	0.0	0.0	0.0	0.0	0.0
TRPC6	7225	symbol	H. sapiens	7225	H. sapiens	TRPC6	transient receptor potential cation channel subfamily C member 6	GO:0006828 manganese ion transport;GO:0000041 transition metal ion transport;GO:0032414 positive regulation of ion transmembrane transporter activity		Voltage-gated ion channels:Transient Receptor Potential Channels; Disease related genes; Potential drug targets; Human disease related genes:Urinary system diseases:Kidney diseases; Transporters:Transporter channels and pores			(M193)PID NEPHRIN NEPH1 PATHWAY; (M233)PID EPO PATHWAY; (M238)PID THROMBIN PAR1 PATHWAY		0.0	0.0	0.0	0.0	0.0	0.0	0.0	0.0	0.0	1.0	0.0	0.0	0.0	0.0	0.0	0.0	0.0	0.0	0.0	0.0
ZSCAN18	65982	symbol	H. sapiens	65982	H. sapiens	ZSCAN18	zinc finger and SCAN domain containing 18	GO:0006357 regulation of transcription by RNA polymerase II;GO:0006355 regulation of transcription, DNA-templated;GO:1903506 regulation of nucleic acid-templated transcription		Predicted intracellular proteins	Nucleoplasm (Approved)				0.0	0.0	0.0	0.0	0.0	0.0	0.0	0.0	0.0	0.0	0.0	0.0	0.0	0.0	0.0	0.0	0.0	0.0	0.0	0.0
AFF3	3899	symbol	H. sapiens	3899	H. sapiens	AFF3	AF4/FMR2 family member 3	GO:0035116 embryonic hindlimb morphogenesis;GO:0035137 hindlimb morphogenesis;GO:0030326 embryonic limb morphogenesis		Predicted intracellular proteins; Cancer-related genes	Nucleoplasm (Supported); Additional: Cytosol				0.0	0.0	0.0	1.0	0.0	0.0	0.0	0.0	0.0	0.0	0.0	1.0	0.0	0.0	0.0	0.0	0.0	0.0	0.0	0.0
NEDD9	4739	symbol	H. sapiens	4739	H. sapiens	NEDD9	neural precursor cell expressed, developmentally down-regulated 9	GO:0090527 actin filament reorganization;GO:1900026 positive regulation of substrate adhesion-dependent cell spreading;GO:0051017 actin filament bundle assembly		Predicted intracellular proteins	Cytosol;Nucleoplasm (Supported); Additional: Plasma membrane			(M5902)HALLMARK APOPTOSIS; (M5893)HALLMARK MITOTIC SPINDLE	1.0	0.0	0.0	0.0	1.0	0.0	1.0	1.0	0.0	0.0	0.0	0.0	0.0	1.0	0.0	0.0	0.0	0.0	0.0	0.0
ZFHX2	85446	symbol	H. sapiens	85446	H. sapiens	ZFHX2	zinc finger homeobox 2	GO:0051930 regulation of sensory perception of pain;GO:0051931 regulation of sensory perception;GO:0030534 adult behavior		Transcription factors:Helix-turn-helix domains; Predicted intracellular proteins; Disease related genes; Human disease related genes:Nervous system diseases:Other nervous and sensory system diseases	Nucleoli fibrillar center (Approved); Additional: Nucleoplasm				0.0	0.0	0.0	0.0	0.0	0.0	0.0	0.0	0.0	0.0	0.0	0.0	0.0	0.0	0.0	0.0	0.0	0.0	1.0	0.0
B3GALT2	8707	symbol	H. sapiens	8707	H. sapiens	B3GALT2	beta-1,3-galactosyltransferase 2	GO:0006682 galactosylceramide biosynthetic process;GO:0019375 galactolipid biosynthetic process;GO:0046476 glycosylceramide biosynthetic process		Enzymes; ENZYME proteins:Transferases	Plasma membrane (Approved)				0.0	0.0	0.0	0.0	0.0	0.0	0.0	0.0	0.0	0.0	0.0	0.0	0.0	0.0	0.0	0.0	0.0	0.0	0.0	0.0
NDFIP2	54602	symbol	H. sapiens	54602	H. sapiens	NDFIP2	Nedd4 family interacting protein 2	GO:0032410 negative regulation of transporter activity;GO:0031398 positive regulation of protein ubiquitination;GO:0051224 negative regulation of protein transport			Vesicles (Supported)				0.0	0.0	0.0	0.0	0.0	0.0	0.0	0.0	0.0	0.0	0.0	0.0	0.0	0.0	0.0	0.0	0.0	0.0	0.0	0.0
GPRC5A	9052	symbol	H. sapiens	9052	H. sapiens	GPRC5A	G protein-coupled receptor class C group 5 member A	GO:0007175 negative regulation of epidermal growth factor-activated receptor activity;GO:0042059 negative regulation of epidermal growth factor receptor signaling pathway;GO:0007176 regulation of epidermal growth factor-activated receptor activity		G-protein coupled receptors:GPCRs excl olfactory receptors; G-protein coupled receptors:Family 3 (C) receptors; Predicted intracellular proteins	Plasma membrane;Vesicles (Enhanced)	Tretinoin			1.0	0.0	0.0	0.0	0.0	0.0	1.0	0.0	0.0	0.0	0.0	0.0	0.0	0.0	0.0	0.0	0.0	0.0	0.0	0.0
MEST	4232	symbol	H. sapiens	4232	H. sapiens	MEST	mesoderm specific transcript	GO:0010883 regulation of lipid storage;GO:0007498 mesoderm development;GO:0009888 tissue development		Predicted intracellular proteins	Cytosol;Golgi apparatus (Approved)			(M5907)HALLMARK ESTROGEN RESPONSE LATE; (M5930)HALLMARK EPITHELIAL MESENCHYMAL TRANSITION	0.0	0.0	0.0	0.0	0.0	0.0	0.0	0.0	0.0	0.0	0.0	0.0	0.0	0.0	0.0	0.0	0.0	0.0	0.0	0.0
EPGN	255324	symbol	H. sapiens	255324	H. sapiens	EPGN	epithelial mitogen	GO:0045741 positive regulation of epidermal growth factor-activated receptor activity;GO:0007176 regulation of epidermal growth factor-activated receptor activity;GO:0045742 positive regulation of epidermal growth factor receptor signaling pathway		Predicted secreted proteins; Predicted intracellular proteins	Cytosol;Nucleoplasm (Approved); Additional: Vesicles		(M5883)NABA SECRETED FACTORS; (M5885)NABA MATRISOME ASSOCIATED; (M5889)NABA MATRISOME		1.0	0.0	1.0	0.0	0.0	0.0	1.0	0.0	0.0	0.0	0.0	0.0	0.0	0.0	0.0	0.0	1.0	0.0	0.0	0.0
GFRA1	2674	symbol	H. sapiens	2674	H. sapiens	GFRA1	GDNF family receptor alpha 1	GO:0035860 glial cell-derived neurotrophic factor receptor signaling pathway;GO:0038179 neurotrophin signaling pathway;GO:0008584 male gonad development			Golgi apparatus (Approved); Additional: Nucleoplasm		(M82)PID RET PATHWAY; (M142)PID AJDISS 2PATHWAY	(M5906)HALLMARK ESTROGEN RESPONSE EARLY	1.0	0.0	0.0	1.0	0.0	0.0	1.0	0.0	0.0	1.0	0.0	0.0	0.0	0.0	1.0	0.0	1.0	0.0	0.0	0.0
GJC1	10052	symbol	H. sapiens	10052	H. sapiens	GJC1	gap junction protein gamma 1	GO:0086021 SA node cell to atrial cardiac muscle cell communication by electrical coupling;GO:0086053 AV node cell to bundle of His cell communication by electrical coupling;GO:0016264 gap junction assembly		Transporters:Transporter channels and pores; Predicted intracellular proteins	Nucleoli (Uncertain); Additional: Cell Junctions;Cytosol				0.0	1.0	1.0	0.0	0.0	0.0	0.0	0.0	1.0	0.0	0.0	0.0	0.0	0.0	0.0	0.0	1.0	0.0	0.0	0.0
TTC9	23508	symbol	H. sapiens	23508	H. sapiens	TTC9	tetratricopeptide repeat domain 9	GO:0060348 bone development;GO:0001501 skeletal system development;GO:0048513 animal organ development		Predicted intracellular proteins	Nuclear bodies (Approved)				0.0	0.0	0.0	0.0	0.0	0.0	0.0	0.0	0.0	0.0	0.0	1.0	0.0	0.0	0.0	0.0	0.0	0.0	1.0	0.0
ATF3	467	symbol	H. sapiens	467	H. sapiens	ATF3	activating transcription factor 3	GO:0061394 regulation of transcription from RNA polymerase II promoter in response to arsenic-containing substance;GO:1903984 positive regulation of TRAIL-activated apoptotic signaling pathway;GO:1903121 regulation of TRAIL-activated apoptotic signaling pathway		Transcription factors:Basic domains; Predicted intracellular proteins	Nucleoli;Nucleoplasm (Supported)		(M166)PID ATF2 PATHWAY; (M167)PID AP1 PATHWAY; (M2)PID SMAD2 3NUCLEAR PATHWAY	(M5892)HALLMARK CHOLESTEROL HOMEOSTASIS; (M5922)HALLMARK UNFOLDED PROTEIN RESPONSE; (M5941)HALLMARK UV RESPONSE UP	0.0	1.0	0.0	0.0	0.0	0.0	1.0	0.0	0.0	0.0	0.0	0.0	1.0	0.0	0.0	0.0	0.0	0.0	0.0	1.0
MGARP	84709	symbol	H. sapiens	84709	H. sapiens	MGARP	mitochondria localized glutamic acid rich protein	GO:0097210 response to gonadotropin-releasing hormone;GO:0097211 cellular response to gonadotropin-releasing hormone;GO:0019896 axonal transport of mitochondrion			Mitochondria (Supported)				0.0	0.0	0.0	0.0	0.0	0.0	0.0	0.0	0.0	0.0	0.0	0.0	0.0	0.0	0.0	0.0	0.0	0.0	0.0	0.0
SAMD12	401474	symbol	H. sapiens	401474	H. sapiens	SAMD12	sterile alpha motif domain containing 12	GO:0007169 transmembrane receptor protein tyrosine kinase signaling pathway;GO:0007167 enzyme linked receptor protein signaling pathway;GO:0007166 cell surface receptor signaling pathway		Human disease related genes:Nervous system diseases:Epilepsy; Predicted intracellular proteins; Disease related genes	Cytosol;Golgi apparatus (Approved)				1.0	0.0	0.0	0.0	0.0	0.0	0.0	0.0	0.0	0.0	0.0	0.0	0.0	0.0	0.0	0.0	0.0	0.0	0.0	0.0
ZFX	7543	symbol	H. sapiens	7543	H. sapiens	ZFX	zinc finger protein X-linked	GO:0045944 positive regulation of transcription by RNA polymerase II;GO:0045893 positive regulation of transcription, DNA-templated;GO:1903508 positive regulation of nucleic acid-templated transcription		Predicted intracellular proteins; Transcription factors:Zinc-coordinating DNA-binding domains	Nucleoplasm (Approved); Additional: Nucleoli				0.0	0.0	0.0	0.0	0.0	0.0	0.0	0.0	0.0	0.0	0.0	0.0	0.0	0.0	0.0	0.0	0.0	0.0	0.0	0.0
LGR5	8549	symbol	H. sapiens	8549	H. sapiens	LGR5	leucine rich repeat containing G protein-coupled receptor 5	GO:2001013 epithelial cell proliferation involved in renal tubule morphogenesis;GO:0007190 activation of adenylate cyclase activity;GO:0009994 oocyte differentiation		G-protein coupled receptors:GPCRs excl olfactory receptors	Golgi apparatus (Approved); Additional: Nucleoplasm				0.0	0.0	1.0	1.0	0.0	1.0	0.0	0.0	0.0	0.0	0.0	0.0	0.0	0.0	1.0	0.0	1.0	0.0	0.0	0.0
PCBD1	5092	symbol	H. sapiens	5092	H. sapiens	PCBD1	pterin-4 alpha-carbinolamine dehydratase 1	GO:0006571 tyrosine biosynthetic process;GO:0009073 aromatic amino acid family biosynthetic process;GO:0009095 aromatic amino acid family biosynthetic process, prephenate pathway		Human disease related genes:Congenital disorders of metabolism:Congenital disorders of amino acid metabolism; ENZYME proteins:Lyases; Disease related genes; Potential drug targets; Enzymes; Predicted intracellular proteins	Nucleoplasm (Enhanced); Additional: Cytosol	L-erythro-7,8-dihydrobiopterin		(M5935)HALLMARK FATTY ACID METABOLISM	0.0	0.0	0.0	0.0	0.0	0.0	0.0	0.0	0.0	0.0	0.0	0.0	0.0	0.0	0.0	0.0	0.0	0.0	0.0	0.0
SLC22A5	6584	symbol	H. sapiens	6584	H. sapiens	SLC22A5	solute carrier family 22 member 5	GO:0060731 positive regulation of intestinal epithelial structure maintenance;GO:0070715 sodium-dependent organic cation transport;GO:1900749 (R)-carnitine transport		Human disease related genes:Immune system diseases:Other immune system diseases; Human disease related genes:Congenital disorders of metabolism:Congenital disorders of lipid/glycolipid metabolism; Disease related genes; Potential drug targets; Transporters:Electrochemical Potential-driven transporters	Mitochondria (Approved)	Levocarnitine		(M5935)HALLMARK FATTY ACID METABOLISM; (M5906)HALLMARK ESTROGEN RESPONSE EARLY; (M5907)HALLMARK ESTROGEN RESPONSE LATE	0.0	0.0	0.0	0.0	0.0	0.0	0.0	0.0	0.0	0.0	0.0	0.0	0.0	0.0	0.0	0.0	0.0	0.0	0.0	0.0
DNAJC6	9829	symbol	H. sapiens	9829	H. sapiens	DNAJC6	DnaJ heat shock protein family (Hsp40) member C6	GO:0016191 synaptic vesicle uncoating;GO:0072318 clathrin coat disassembly;GO:0072319 vesicle uncoating		ENZYME proteins:Hydrolases; Disease related genes; Potential drug targets; Enzymes; Predicted intracellular proteins	Cytosol (Approved); Additional: Nucleoplasm;Plasma membrane				0.0	0.0	0.0	0.0	0.0	0.0	0.0	0.0	0.0	0.0	0.0	0.0	0.0	0.0	0.0	0.0	0.0	0.0	0.0	0.0
FUCA1	2517	symbol	H. sapiens	2517	H. sapiens	FUCA1	alpha-L-fucosidase 1	GO:0016139 glycoside catabolic process;GO:0019377 glycolipid catabolic process;GO:0006004 fucose metabolic process		Human disease related genes:Congenital disorders of metabolism:Lysosomal storage diseases; ENZYME proteins:Hydrolases; Disease related genes; Potential drug targets; Enzymes; Predicted intracellular proteins; Human disease related genes:Congenital disorders of metabolism:Congenital disorders of glycan/glycoprotein metabolism	Vesicles (Supported)			(M5930)HALLMARK EPITHELIAL MESENCHYMAL TRANSITION; (M5939)HALLMARK P53 PATHWAY; (M5953)HALLMARK KRAS SIGNALING UP	0.0	0.0	0.0	0.0	0.0	0.0	0.0	0.0	0.0	0.0	0.0	0.0	0.0	0.0	0.0	0.0	0.0	0.0	0.0	0.0
FYCO1	79443	symbol	H. sapiens	79443	H. sapiens	FYCO1	FYVE and coiled-coil domain autophagy adaptor 1	GO:1901098 positive regulation of autophagosome maturation;GO:0072383 plus-end-directed vesicle transport along microtubule;GO:0072386 plus-end-directed organelle transport along microtubule		Human disease related genes:Nervous system diseases:Eye disease; Predicted intracellular proteins; Disease related genes	Vesicles (Enhanced)				0.0	0.0	0.0	0.0	0.0	0.0	0.0	0.0	0.0	0.0	0.0	0.0	0.0	0.0	0.0	0.0	0.0	0.0	0.0	0.0
AXL	558	symbol	H. sapiens	558	H. sapiens	AXL	AXL receptor tyrosine kinase	GO:0097350 neutrophil clearance;GO:0048549 positive regulation of pinocytosis;GO:2000669 negative regulation of dendritic cell apoptotic process	Tyr protein kinase family	FDA approved drug targets:Small molecule drugs; Kinases:Tyr protein kinases; Disease related genes; Enzymes; ENZYME proteins:Transferases	Plasma membrane (Supported); Additional: Actin filaments;Vesicles	Fostamatinib; Gilteritinib	(M236)PID DELTA NP63 PATHWAY	(M5932)HALLMARK INFLAMMATORY RESPONSE	1.0	0.0	0.0	0.0	1.0	0.0	1.0	0.0	1.0	1.0	0.0	0.0	0.0	0.0	0.0	0.0	0.0	0.0	1.0	0.0
ALDH4A1	8659	symbol	H. sapiens	8659	H. sapiens	ALDH4A1	aldehyde dehydrogenase 4 family member A1	GO:0010133 proline catabolic process to glutamate;GO:0006562 proline catabolic process;GO:0019470 4-hydroxyproline catabolic process		ENZYME proteins:Oxidoreductases; Human disease related genes:Congenital disorders of metabolism:Congenital disorders of amino acid metabolism; Disease related genes; Potential drug targets; Enzymes; Predicted intracellular proteins	Mitochondria (Supported)	NADH			0.0	0.0	0.0	0.0	0.0	0.0	0.0	0.0	0.0	0.0	0.0	0.0	0.0	0.0	0.0	0.0	0.0	0.0	0.0	0.0
PLAU	5328	symbol	H. sapiens	5328	H. sapiens	PLAU	plasminogen activator, urokinase	GO:2000097 regulation of smooth muscle cell-matrix adhesion;GO:0014909 smooth muscle cell migration;GO:0031639 plasminogen activation		Cancer-related genes:Candidate cancer biomarkers; ENZYME proteins:Hydrolases; Predicted secreted proteins; Disease related genes; Potential drug targets; Enzymes; Predicted intracellular proteins; Peptidases:Serine-type peptidases	Golgi apparatus;Vesicles (Uncertain)	Amiloride; 2-{2-hydroxy-[1,1'-biphenyl]-3-yl}-1H-1,3-benzodiazole-5-carboximidamide; 2-(2-Hydroxy-5-Methoxy-Phenyl)-1h-Benzoimidazole-5-Carboxamidine; 6-(N-Phenylcarbamyl)-2-Naphthalenecarboxamidine; 2-(2-hydroxy-phenyl)-3H-benzoimidazole-5-carboxamidine; 6-[N-(4-(Aminomethyl)Phenyl)Carbamyl]-2-Naphthalenecarboxamidine; 6-[N-(1-Isopropyl-3,4-Dihydro-7-Isoquinolinyl)Carbamyl]-2-Naphthalenecarboxam…	(M212)PID INTEGRIN5 PATHWAY; (M169)PID INTEGRIN2 PATHWAY; (M63)PID AVB3 OPN PATHWAY	(M5946)HALLMARK COAGULATION; (M5890)HALLMARK TNFA SIGNALING VIA NFKB; (M5953)HALLMARK KRAS SIGNALING UP	0.0	0.0	0.0	0.0	1.0	0.0	0.0	0.0	0.0	1.0	0.0	0.0	1.0	0.0	0.0	0.0	1.0	0.0	0.0	0.0
SLITRK1	114798	symbol	H. sapiens	114798	H. sapiens	SLITRK1	SLIT and NTRK like family member 1	GO:0099560 synaptic membrane adhesion;GO:0099174 regulation of presynapse organization;GO:1905606 regulation of presynapse assembly		Predicted secreted proteins; Human disease related genes:Other diseases:Mental and behavioural disorders; Disease related genes					0.0	0.0	0.0	0.0	0.0	0.0	0.0	0.0	1.0	1.0	0.0	0.0	0.0	1.0	0.0	0.0	0.0	1.0	1.0	0.0
NEFM	4741	symbol	H. sapiens	4741	H. sapiens	NEFM	neurofilament medium chain	GO:0033693 neurofilament bundle assembly;GO:0045110 intermediate filament bundle assembly;GO:0045109 intermediate filament organization		Predicted intracellular proteins	Intermediate filaments (Enhanced)				0.0	0.0	0.0	0.0	0.0	0.0	0.0	0.0	0.0	0.0	0.0	0.0	0.0	0.0	0.0	0.0	0.0	0.0	0.0	0.0
ATP8B1	5205	symbol	H. sapiens	5205	H. sapiens	ATP8B1	ATPase phospholipid transporting 8B1	GO:0021650 vestibulocochlear nerve formation;GO:0032534 regulation of microvillus assembly;GO:0006855 xenobiotic transmembrane transport		Human disease related genes:Digestive system diseases:Liver diseases; ENZYME proteins; Disease related genes; Potential drug targets; Enzymes; Transporters:Primary Active Transporters; Predicted intracellular proteins	Cytosol;Plasma membrane (Supported); Additional: Nuclear bodies;Nucleoplasm			(M5916)HALLMARK APICAL SURFACE	0.0	0.0	0.0	0.0	0.0	0.0	0.0	0.0	0.0	0.0	0.0	0.0	0.0	1.0	0.0	0.0	1.0	0.0	0.0	0.0
FGF5	2250	symbol	H. sapiens	2250	H. sapiens	FGF5	fibroblast growth factor 5	GO:0023019 signal transduction involved in regulation of gene expression;GO:0008543 fibroblast growth factor receptor signaling pathway;GO:0044344 cellular response to fibroblast growth factor stimulus		RAS pathway related proteins; Human disease related genes:Skin diseases:Skin and soft tissue diseases; Predicted secreted proteins; Disease related genes	Nucleoli fibrillar center (Supported); Additional: Cytosol;Nucleoplasm		(M5883)NABA SECRETED FACTORS; (M5885)NABA MATRISOME ASSOCIATED; (M5889)NABA MATRISOME		1.0	0.0	0.0	1.0	0.0	1.0	1.0	0.0	0.0	0.0	0.0	0.0	1.0	0.0	1.0	0.0	1.0	0.0	0.0	0.0
NRXN2	9379	symbol	H. sapiens	9379	H. sapiens	NRXN2	neurexin 2	GO:0097118 neuroligin clustering involved in postsynaptic membrane assembly;GO:0097116 gephyrin clustering involved in postsynaptic density assembly;GO:0042297 vocal learning		Predicted intracellular proteins				(M5915)HALLMARK APICAL JUNCTION	0.0	0.0	0.0	0.0	0.0	0.0	0.0	0.0	1.0	0.0	0.0	0.0	0.0	0.0	0.0	1.0	0.0	0.0	1.0	0.0
PEAR1	375033	symbol	H. sapiens	375033	H. sapiens	PEAR1	platelet endothelial aggregation receptor 1	GO:0043654 recognition of apoptotic cell;GO:0014065 phosphatidylinositol 3-kinase signaling;GO:0043491 protein kinase B signaling		Predicted intracellular proteins	Cell Junctions;Nucleoplasm (Approved); Additional: Centrosome				0.0	0.0	0.0	0.0	0.0	0.0	0.0	0.0	1.0	0.0	0.0	0.0	0.0	0.0	0.0	0.0	0.0	0.0	1.0	0.0
STARD13	90627	symbol	H. sapiens	90627	H. sapiens	STARD13	StAR related lipid transfer domain containing 13	GO:0097498 endothelial tube lumen extension;GO:0003159 morphogenesis of an endothelium;GO:0061154 endothelial tube morphogenesis		Predicted intracellular proteins					0.0	0.0	1.0	1.0	0.0	0.0	0.0	0.0	0.0	0.0	1.0	0.0	0.0	0.0	1.0	0.0	0.0	0.0	0.0	0.0
FGD4	121512	symbol	H. sapiens	121512	H. sapiens	FGD4	FYVE, RhoGEF and PH domain containing 4	GO:0046847 filopodium assembly;GO:0008360 regulation of cell shape;GO:0051056 regulation of small GTPase mediated signal transduction		Predicted intracellular proteins; Human disease related genes:Nervous system diseases:Neurodegenerative diseases; Disease related genes	Actin filaments (Approved)			(M5893)HALLMARK MITOTIC SPINDLE	0.0	0.0	0.0	0.0	0.0	0.0	0.0	0.0	0.0	0.0	0.0	0.0	0.0	0.0	0.0	0.0	0.0	0.0	0.0	0.0
UGCG	7357	symbol	H. sapiens	7357	H. sapiens	UGCG	UDP-glucose ceramide glucosyltransferase	GO:0006679 glucosylceramide biosynthetic process;GO:1903575 cornified envelope assembly;GO:0006678 glucosylceramide metabolic process		Enzymes; Transporters; FDA approved drug targets:Small molecule drugs; ENZYME proteins:Transferases		Miglustat; Eliglustat	(M143)PID IL2 PI3K PATHWAY	(M5906)HALLMARK ESTROGEN RESPONSE EARLY	0.0	0.0	0.0	0.0	0.0	0.0	0.0	0.0	0.0	0.0	0.0	0.0	0.0	0.0	1.0	0.0	0.0	0.0	0.0	0.0
SLC35F5	80255	symbol	H. sapiens	80255	H. sapiens	SLC35F5	solute carrier family 35 member F5	GO:0090087 regulation of peptide transport;GO:0051049 regulation of transport;GO:0032879 regulation of localization		Transporters:Electrochemical Potential-driven transporters	Plasma membrane (Uncertain)				0.0	0.0	0.0	0.0	0.0	0.0	0.0	0.0	0.0	0.0	0.0	0.0	0.0	0.0	0.0	0.0	0.0	0.0	0.0	0.0
PDE5A	8654	symbol	H. sapiens	8654	H. sapiens	PDE5A	phosphodiesterase 5A	GO:0060282 positive regulation of oocyte development;GO:0060281 regulation of oocyte development;GO:1905879 regulation of oogenesis		Enzymes; ENZYME proteins:Hydrolases; FDA approved drug targets:Small molecule drugs; Predicted intracellular proteins	Cytosol (Approved)	Sildenafil; Theophylline; Tadalafil; Vardenafil; Dipyridamole; Guanosine-5'-Monophosphate; gamma-Glutamyl[S-(2-iodobenzyl)cysteinyl]glycine; OSI-461; Avanafil; Exisulind; Udenafil; 3-isobutyl-1-methyl-7H-xanthine; 5-ethoxy-4-(1-methyl-7-oxo-3-propyl-6,7-dihydro-1H-pyrazolo[4,3-d]pyrimidin-5-yl)thiophene-2-sulfonamide; Fostamatinib			0.0	0.0	0.0	1.0	1.0	0.0	1.0	0.0	0.0	0.0	0.0	0.0	0.0	1.0	0.0	0.0	0.0	0.0	0.0	0.0
DAGLA	747	symbol	H. sapiens	747	H. sapiens	DAGLA	diacylglycerol lipase alpha	GO:0071926 endocannabinoid signaling pathway;GO:0098920 retrograde trans-synaptic signaling by lipid;GO:0098921 retrograde trans-synaptic signaling by endocannabinoid		Disease related genes			(M266)PID NCADHERIN PATHWAY		0.0	0.0	0.0	0.0	0.0	1.0	0.0	0.0	0.0	0.0	0.0	0.0	0.0	0.0	0.0	0.0	0.0	0.0	0.0	0.0
SH2B3	10019	symbol	H. sapiens	10019	H. sapiens	SH2B3	SH2B adaptor protein 3	GO:0035702 monocyte homeostasis;GO:1900234 regulation of Kit signaling pathway;GO:1900235 negative regulation of Kit signaling pathway		Human disease related genes:Endocrine and metabolic diseases:Diabetes; Predicted intracellular proteins; Cancer-related genes; Disease related genes	Nucleoplasm (Approved)	Pazopanib	(M233)PID EPO PATHWAY; (M231)PID KIT PATHWAY	(M5921)HALLMARK COMPLEMENT	1.0	0.0	0.0	1.0	1.0	0.0	1.0	0.0	0.0	0.0	0.0	1.0	0.0	0.0	0.0	0.0	0.0	0.0	1.0	0.0
MEOX2	4223	symbol	H. sapiens	4223	H. sapiens	MEOX2	mesenchyme homeobox 2	GO:0001757 somite specification;GO:0007379 segment specification;GO:0090051 negative regulation of cell migration involved in sprouting angiogenesis		Transcription factors:Helix-turn-helix domains; Predicted intracellular proteins					0.0	1.0	1.0	1.0	0.0	0.0	0.0	0.0	0.0	0.0	1.0	1.0	0.0	0.0	0.0	0.0	0.0	0.0	0.0	0.0
RAPGEF3	10411	symbol	H. sapiens	10411	H. sapiens	RAPGEF3	Rap guanine nucleotide exchange factor 3	GO:0034242 negative regulation of syncytium formation by plasma membrane fusion;GO:0032486 Rap protein signal transduction;GO:0046827 positive regulation of protein export from nucleus		Predicted intracellular proteins	Cytosol (Uncertain); Additional: Endoplasmic reticulum			(M5946)HALLMARK COAGULATION	0.0	0.0	1.0	0.0	0.0	0.0	1.0	0.0	0.0	0.0	0.0	0.0	0.0	1.0	1.0	0.0	0.0	0.0	1.0	0.0
NHSL2	340527	symbol	H. sapiens	340527	H. sapiens	NHSL2	NHS like 2	GO:0030154 cell differentiation;GO:0048869 cellular developmental process;GO:0032502 developmental process		Predicted intracellular proteins	Cell Junctions;Plasma membrane (Approved); Additional: Nucleoplasm				0.0	0.0	0.0	0.0	0.0	0.0	0.0	0.0	0.0	0.0	0.0	0.0	0.0	0.0	0.0	0.0	0.0	0.0	0.0	0.0
NFKBIZ	64332	symbol	H. sapiens	64332	H. sapiens	NFKBIZ	NFKB inhibitor zeta	GO:2000321 positive regulation of T-helper 17 cell differentiation;GO:2000318 positive regulation of T-helper 17 type immune response;GO:2000319 regulation of T-helper 17 cell differentiation		Transcription factors:Immunoglobulin fold; Predicted intracellular proteins	Nuclear speckles (Supported); Additional: Cytoplasmic bodies			(M5947)HALLMARK IL2 STAT5 SIGNALING	0.0	0.0	0.0	0.0	1.0	0.0	0.0	0.0	0.0	0.0	0.0	0.0	0.0	0.0	0.0	0.0	0.0	0.0	0.0	0.0
FHL1	2273	symbol	H. sapiens	2273	H. sapiens	FHL1	four and a half LIM domains 1	GO:0003254 regulation of membrane depolarization;GO:0043268 positive regulation of potassium ion transport;GO:0010972 negative regulation of G2/M transition of mitotic cell cycle		Predicted intracellular proteins; Human disease related genes:Musculoskeletal diseases:Muscular diseases; Disease related genes	Cytosol (Supported); Additional: Plasma membrane			(M5909)HALLMARK MYOGENESIS	0.0	1.0	0.0	0.0	0.0	0.0	0.0	1.0	0.0	0.0	0.0	0.0	0.0	0.0	0.0	0.0	0.0	0.0	0.0	0.0
KIRREL3	84623	symbol	H. sapiens	84623	H. sapiens	KIRREL3	kirre like nephrin family adhesion molecule 3	GO:0021730 trigeminal sensory nucleus development;GO:0021740 principal sensory nucleus of trigeminal nerve development;GO:0002121 inter-male aggressive behavior		Human disease related genes:Other diseases:Mental and behavioural disorders; Disease related genes					0.0	0.0	0.0	0.0	0.0	0.0	0.0	0.0	1.0	1.0	0.0	0.0	0.0	0.0	1.0	0.0	0.0	0.0	1.0	0.0
BRD4	23476	symbol	H. sapiens	23476	H. sapiens	BRD4	bromodomain containing 4	GO:1901407 regulation of phosphorylation of RNA polymerase II C-terminal domain;GO:2001255 positive regulation of histone H3-K36 trimethylation;GO:0000416 positive regulation of histone H3-K36 methylation		Predicted intracellular proteins; Cancer-related genes; Disease related genes	Nucleoplasm (Enhanced)		(M7955)SIG INSULIN RECEPTOR PATHWAY IN CARDIAC MYOCYTES		0.0	0.0	0.0	0.0	0.0	0.0	1.0	0.0	0.0	0.0	0.0	0.0	0.0	0.0	0.0	0.0	0.0	0.0	0.0	0.0
TNS2	23371	symbol	H. sapiens	23371	H. sapiens	TNS2	tensin 2	GO:0014850 response to muscle activity;GO:0046627 negative regulation of insulin receptor signaling pathway;GO:1900077 negative regulation of cellular response to insulin stimulus		Enzymes; ENZYME proteins:Hydrolases; Predicted intracellular proteins					0.0	0.0	0.0	1.0	0.0	0.0	0.0	0.0	0.0	0.0	0.0	0.0	0.0	0.0	1.0	0.0	0.0	1.0	0.0	0.0
SEMA3D	223117	symbol	H. sapiens	223117	H. sapiens	SEMA3D	semaphorin 3D	GO:0048843 negative regulation of axon extension involved in axon guidance;GO:0048841 regulation of axon extension involved in axon guidance;GO:0071526 semaphorin-plexin signaling pathway		Predicted secreted proteins; Predicted intracellular proteins	Golgi apparatus (Approved); Additional: Plasma membrane		(M5880)NABA ECM AFFILIATED; (M5885)NABA MATRISOME ASSOCIATED; (M5889)NABA MATRISOME		0.0	0.0	1.0	0.0	0.0	0.0	0.0	1.0	0.0	1.0	1.0	0.0	0.0	1.0	0.0	0.0	1.0	0.0	0.0	0.0
TNNC1	7134	symbol	H. sapiens	7134	H. sapiens	TNNC1	troponin C1, slow skeletal and cardiac type	GO:0002086 diaphragm contraction;GO:0032972 regulation of muscle filament sliding speed;GO:0003011 involuntary skeletal muscle contraction		Predicted intracellular proteins; FDA approved drug targets:Small molecule drugs; Human disease related genes:Cardiovascular diseases:Cardiac diseases; Disease related genes	Actin filaments;Mitochondria;Nucleoplasm (Approved)	Trifluoperazine; Levosimendan; Felodipine; Bepridil; Calcium; Aluminium monostearate; 5-[1-(3,4-Dimethoxy-Benzoyl)-1,2,3,4-Tetrahydro-Quinolin-6-Yl]-6-Methyl-3,6-Dihydro-[1,3,4]Thiadiazin-2-One; N-(6-Aminohexyl)-5-Chloro-1-Naphthalenesulfonamide		(M5907)HALLMARK ESTROGEN RESPONSE LATE; (M5909)HALLMARK MYOGENESIS	0.0	1.0	0.0	1.0	0.0	0.0	0.0	0.0	0.0	0.0	0.0	0.0	0.0	0.0	0.0	0.0	1.0	0.0	0.0	0.0
SDC3	9672	symbol	H. sapiens	9672	H. sapiens	SDC3	syndecan 3	GO:0016477 cell migration;GO:0048870 cell motility;GO:0051674 localization of cell		Human disease related genes:Endocrine and metabolic diseases:Other endocrine and metabolic diseases	Mitochondria (Approved); Additional: Nucleoplasm		(M251)PID SYNDECAN 3 PATHWAY; (M5880)NABA ECM AFFILIATED; (M5885)NABA MATRISOME ASSOCIATED	(M5891)HALLMARK HYPOXIA; (M5915)HALLMARK APICAL JUNCTION; (M5937)HALLMARK GLYCOLYSIS	0.0	0.0	0.0	0.0	0.0	0.0	0.0	0.0	0.0	0.0	0.0	0.0	0.0	0.0	0.0	0.0	1.0	0.0	0.0	0.0
TOM1L2	146691	symbol	H. sapiens	146691	H. sapiens	TOM1L2	target of myb1 like 2 membrane trafficking protein	GO:0045839 negative regulation of mitotic nuclear division;GO:0051784 negative regulation of nuclear division;GO:0007088 regulation of mitotic nuclear division		Predicted intracellular proteins	Intermediate filaments (Approved); Additional: Golgi apparatus				0.0	0.0	0.0	0.0	0.0	0.0	0.0	0.0	0.0	0.0	0.0	0.0	0.0	0.0	1.0	0.0	0.0	0.0	0.0	0.0
PADI2	11240	symbol	H. sapiens	11240	H. sapiens	PADI2	peptidyl arginine deiminase 2	GO:0010848 regulation of chromatin disassembly;GO:0036413 histone H3-R26 citrullination;GO:1901624 negative regulation of lymphocyte chemotaxis		Enzymes; ENZYME proteins:Hydrolases; Predicted intracellular proteins		Citrulline			0.0	0.0	0.0	0.0	0.0	0.0	0.0	0.0	0.0	0.0	1.0	0.0	0.0	0.0	0.0	0.0	0.0	0.0	0.0	0.0
CALD1	800	symbol	H. sapiens	800	H. sapiens	CALD1	caldesmon 1	GO:0051017 actin filament bundle assembly;GO:0061572 actin filament bundle organization;GO:0006936 muscle contraction		Predicted intracellular proteins	Actin filaments;Plasma membrane (Enhanced)			(M5930)HALLMARK EPITHELIAL MESENCHYMAL TRANSITION	0.0	0.0	1.0	0.0	0.0	0.0	0.0	0.0	0.0	0.0	0.0	0.0	0.0	0.0	0.0	0.0	0.0	0.0	0.0	0.0
C10orf54	64115	gene_synonym	H. sapiens	64115	H. sapiens	VSIR	V-set immunoregulatory receptor	GO:0120158 positive regulation of collagen catabolic process;GO:2000565 negative regulation of CD8-positive, alpha-beta T cell proliferation;GO:0010710 regulation of collagen catabolic process			Nucleoplasm (Approved)				0.0	0.0	0.0	1.0	1.0	0.0	0.0	0.0	0.0	0.0	0.0	0.0	0.0	0.0	0.0	0.0	0.0	0.0	0.0	0.0
OLFML2A	169611	symbol	H. sapiens	169611	H. sapiens	OLFML2A	olfactomedin like 2A	GO:0030198 extracellular matrix organization;GO:0043062 extracellular structure organization;GO:0045229 external encapsulating structure organization		Predicted secreted proteins; Predicted intracellular proteins	Cytosol;Nucleoplasm (Approved)				0.0	0.0	0.0	0.0	0.0	0.0	0.0	0.0	0.0	0.0	0.0	0.0	0.0	0.0	0.0	0.0	0.0	0.0	0.0	0.0
ANO3	63982	symbol	H. sapiens	63982	H. sapiens	ANO3	anoctamin 3	GO:0061591 calcium activated galactosylceramide scrambling;GO:0061590 calcium activated phosphatidylcholine scrambling;GO:0061588 calcium activated phospholipid scrambling		Human disease related genes:Nervous system diseases:Other nervous and sensory system diseases; Disease related genes; Potential drug targets; Transporters:Transporter channels and pores; Predicted intracellular proteins					0.0	0.0	0.0	0.0	0.0	0.0	0.0	0.0	0.0	0.0	0.0	0.0	0.0	0.0	0.0	1.0	0.0	0.0	0.0	0.0
EFNB1	1947	symbol	H. sapiens	1947	H. sapiens	EFNB1	ephrin B1	GO:0031295 T cell costimulation;GO:0031294 lymphocyte costimulation;GO:0048013 ephrin receptor signaling pathway		Human disease related genes:Congenital malformations:Other congenital malformations; Disease related genes; Cancer-related genes:Candidate cancer biomarkers	Plasma membrane (Supported)		(M257)PID EPHRINB REV PATHWAY; (M62)PID EPHB FWD PATHWAY		1.0	0.0	1.0	0.0	1.0	0.0	0.0	1.0	0.0	1.0	0.0	0.0	0.0	0.0	0.0	0.0	0.0	0.0	0.0	0.0
SGIP1	84251	symbol	H. sapiens	84251	H. sapiens	SGIP1	SH3GL interacting endocytic adaptor 1	GO:2000253 positive regulation of feeding behavior;GO:0048268 clathrin coat assembly;GO:0048520 positive regulation of behavior		Predicted intracellular proteins	Mitochondria (Approved)				0.0	0.0	0.0	0.0	0.0	0.0	0.0	0.0	0.0	0.0	0.0	0.0	0.0	0.0	0.0	0.0	0.0	0.0	0.0	0.0
ADAMTSL4	54507	symbol	H. sapiens	54507	H. sapiens	ADAMTSL4	ADAMTS like 4	GO:0002064 epithelial cell development;GO:0030198 extracellular matrix organization;GO:0043062 extracellular structure organization		Human disease related genes:Congenital malformations:Congenital malformations of eye; Predicted secreted proteins; Disease related genes	Cytosol;Plasma membrane (Approved)		(M3468)NABA ECM REGULATORS; (M5885)NABA MATRISOME ASSOCIATED; (M5889)NABA MATRISOME		0.0	0.0	0.0	0.0	0.0	0.0	0.0	0.0	0.0	0.0	0.0	0.0	0.0	0.0	1.0	0.0	1.0	0.0	0.0	1.0
GSN	2934	symbol	H. sapiens	2934	H. sapiens	GSN	gelsolin	GO:1903906 regulation of plasma membrane raft polarization;GO:1903921 regulation of protein processing in phagocytic vesicle;GO:1903923 positive regulation of protein processing in phagocytic vesicle		Cancer-related genes:Candidate cancer biomarkers; Predicted secreted proteins; Disease related genes; Human disease related genes:Nervous system diseases:Neurodegenerative diseases; Predicted intracellular proteins	Actin filaments (Supported)	Zinc; Latrunculin A; Copper; Zinc acetate	(M63)PID AVB3 OPN PATHWAY; (M266)PID NCADHERIN PATHWAY; (M127)PID ERBB1 RECEPTOR PROXIMAL PATHWAY	(M5946)HALLMARK COAGULATION; (M5902)HALLMARK APOPTOSIS; (M5893)HALLMARK MITOTIC SPINDLE	0.0	0.0	0.0	0.0	0.0	0.0	0.0	0.0	0.0	0.0	0.0	0.0	0.0	0.0	0.0	1.0	0.0	0.0	0.0	1.0
MAML2	84441	symbol	H. sapiens	84441	H. sapiens	MAML2	mastermind like transcriptional coactivator 2	GO:0007221 positive regulation of transcription of Notch receptor target;GO:0007219 Notch signaling pathway;GO:0045944 positive regulation of transcription by RNA polymerase II		Predicted intracellular proteins; Human disease related genes:Cancers:Head and neck cancers; Cancer-related genes; Disease related genes	Nuclear bodies (Supported); Additional: Cytosol;Nucleoplasm		(M288)PID HES HEY PATHWAY; (M17)PID NOTCH PATHWAY	(M5903)HALLMARK NOTCH SIGNALING	0.0	0.0	0.0	0.0	0.0	0.0	0.0	0.0	0.0	0.0	0.0	0.0	0.0	0.0	0.0	0.0	0.0	0.0	0.0	0.0
IGFBP2	3485	symbol	H. sapiens	3485	H. sapiens	IGFBP2	insulin like growth factor binding protein 2	GO:0010226 response to lithium ion;GO:0043567 regulation of insulin-like growth factor receptor signaling pathway;GO:0042104 positive regulation of activated T cell proliferation		Predicted secreted proteins; Predicted intracellular proteins; Cancer-related genes:Candidate cancer biomarkers	Endoplasmic reticulum (Approved)		(M3008)NABA ECM GLYCOPROTEINS; (M5884)NABA CORE MATRISOME; (M5889)NABA MATRISOME	(M5941)HALLMARK UV RESPONSE UP; (M5930)HALLMARK EPITHELIAL MESENCHYMAL TRANSITION; (M5956)HALLMARK KRAS SIGNALING DN	0.0	0.0	0.0	0.0	1.0	0.0	0.0	1.0	0.0	0.0	0.0	0.0	0.0	0.0	0.0	1.0	0.0	0.0	0.0	0.0
IGDCC4	57722	symbol	H. sapiens	57722	H. sapiens	IGDCC4	immunoglobulin superfamily DCC subclass member 4	GO:0098609 cell-cell adhesion;GO:0007155 cell adhesion;GO:0022610 biological adhesion			Cytosol;Nucleoplasm (Approved)				0.0	0.0	0.0	0.0	0.0	0.0	0.0	0.0	1.0	0.0	0.0	0.0	0.0	0.0	0.0	0.0	0.0	0.0	0.0	0.0
BIN1	274	symbol	H. sapiens	274	H. sapiens	BIN1	bridging integrator 1	GO:0106135 negative regulation of cardiac muscle cell contraction;GO:1903946 negative regulation of ventricular cardiac muscle cell action potential;GO:0060988 lipid tube assembly		Predicted intracellular proteins; Human disease related genes:Musculoskeletal diseases:Muscular diseases; Disease related genes	Cytosol (Supported)		(M67)PID ARF6 TRAFFICKING PATHWAY; (M19)PID P73PATHWAY	(M5893)HALLMARK MITOTIC SPINDLE; (M5909)HALLMARK MYOGENESIS	0.0	1.0	0.0	0.0	0.0	0.0	0.0	0.0	0.0	0.0	1.0	0.0	0.0	1.0	0.0	0.0	0.0	0.0	0.0	1.0
PSD3	23362	symbol	H. sapiens	23362	H. sapiens	PSD3	pleckstrin and Sec7 domain containing 3	GO:0032012 regulation of ARF protein signal transduction;GO:0046578 regulation of Ras protein signal transduction;GO:0051056 regulation of small GTPase mediated signal transduction		Predicted intracellular proteins	Nucleoplasm;Vesicles (Approved); Additional: Cytosol				0.0	0.0	0.0	0.0	0.0	0.0	0.0	0.0	0.0	0.0	0.0	0.0	0.0	0.0	0.0	0.0	0.0	0.0	0.0	0.0
PRKAA2	5563	symbol	H. sapiens	5563	H. sapiens	PRKAA2	protein kinase AMP-activated catalytic subunit alpha 2	GO:0062028 regulation of stress granule assembly;GO:1904428 negative regulation of tubulin deacetylation;GO:0035404 histone-serine phosphorylation	CAMK Ser/Thr protein kinase family	FDA approved drug targets:Small molecule drugs; Transporters:Accessory Factors Involved in Transport; Kinases:CAMK Ser/Thr protein kinases; Enzymes; ENZYME proteins:Transferases	Nuclear speckles (Supported); Additional: Golgi apparatus		(M87)PID LKB1 PATHWAY; (M237)PID VEGFR1 2 PATHWAY	(M5923)HALLMARK PI3K AKT MTOR SIGNALING	0.0	0.0	0.0	0.0	0.0	0.0	1.0	0.0	0.0	0.0	0.0	0.0	1.0	0.0	0.0	0.0	0.0	0.0	0.0	0.0
RAP1GAP2	23108	symbol	H. sapiens	23108	H. sapiens	RAP1GAP2	RAP1 GTPase activating protein 2	GO:0090630 activation of GTPase activity;GO:0008361 regulation of cell size;GO:0043547 positive regulation of GTPase activity		Predicted intracellular proteins	Cytosol;Nuclear membrane (Supported)				0.0	0.0	0.0	0.0	0.0	0.0	0.0	0.0	0.0	0.0	0.0	0.0	0.0	0.0	0.0	0.0	0.0	0.0	0.0	0.0
MYPN	84665	symbol	H. sapiens	84665	H. sapiens	MYPN	myopalladin	GO:0070593 dendrite self-avoidance;GO:0045214 sarcomere organization;GO:0008038 neuron recognition		Predicted intracellular proteins; Human disease related genes:Musculoskeletal diseases:Muscular diseases; Human disease related genes:Cardiovascular diseases:Cardiac diseases; Disease related genes	Nucleoplasm;Vesicles (Approved); Additional: Cytosol				0.0	1.0	0.0	0.0	0.0	0.0	0.0	0.0	1.0	1.0	0.0	0.0	0.0	0.0	0.0	0.0	0.0	0.0	0.0	0.0
ST3GAL5	8869	symbol	H. sapiens	8869	H. sapiens	ST3GAL5	ST3 beta-galactoside alpha-2,3-sialyltransferase 5	GO:0001574 ganglioside biosynthetic process;GO:0097503 sialylation;GO:0001573 ganglioside metabolic process		Human disease related genes:Nervous system diseases:Epilepsy; ENZYME proteins:Transferases; Disease related genes; Potential drug targets; Enzymes; Predicted intracellular proteins; Human disease related genes:Congenital disorders of metabolism:Congenital disorders of glycan/glycoprotein metabolism	Vesicles (Approved)	99mTc-14 F7 Mab		(M5913)HALLMARK INTERFERON GAMMA RESPONSE	0.0	0.0	0.0	0.0	0.0	0.0	0.0	0.0	0.0	0.0	0.0	0.0	0.0	0.0	0.0	0.0	0.0	0.0	0.0	0.0
TRPV2	51393	symbol	H. sapiens	51393	H. sapiens	TRPV2	transient receptor potential cation channel subfamily V member 2	GO:0098703 calcium ion import across plasma membrane;GO:1902656 calcium ion import into cytosol;GO:0090280 positive regulation of calcium ion import		Transporters:Transporter channels and pores; Predicted intracellular proteins	Plasma membrane (Supported)	Cannabidiol; Tetrahydrocannabivarin; Medical Cannabis; Nabiximols; Cannabidivarin			0.0	0.0	0.0	0.0	0.0	0.0	0.0	1.0	0.0	0.0	0.0	0.0	0.0	1.0	0.0	0.0	0.0	0.0	0.0	0.0
GCNT4	51301	symbol	H. sapiens	51301	H. sapiens	GCNT4	glucosaminyl (N-acetyl) transferase 4	GO:0002121 inter-male aggressive behavior;GO:0002118 aggressive behavior;GO:0042403 thyroid hormone metabolic process		Enzymes; Predicted intracellular proteins; ENZYME proteins:Transferases	Golgi apparatus (Supported); Additional: Nucleoplasm				0.0	0.0	0.0	1.0	0.0	0.0	0.0	0.0	0.0	0.0	0.0	0.0	0.0	0.0	1.0	0.0	0.0	0.0	1.0	0.0
PPP1R14A	94274	symbol	H. sapiens	94274	H. sapiens	PPP1R14A	protein phosphatase 1 regulatory inhibitor subunit 14A	GO:0043086 negative regulation of catalytic activity;GO:0044092 negative regulation of molecular function;GO:0042325 regulation of phosphorylation		Predicted intracellular proteins	Nucleoplasm (Supported); Additional: Nuclear bodies		(M71)PID ILK PATHWAY		0.0	0.0	0.0	0.0	0.0	0.0	0.0	0.0	0.0	0.0	0.0	0.0	1.0	0.0	0.0	0.0	0.0	0.0	0.0	0.0
NBEAL2	23218	symbol	H. sapiens	23218	H. sapiens	NBEAL2	neurobeachin like 2	GO:0030220 platelet formation;GO:0036344 platelet morphogenesis;GO:0030099 myeloid cell differentiation		Human disease related genes:Cardiovascular diseases:Hematologic diseases; Predicted intracellular proteins; Disease related genes					0.0	0.0	0.0	0.0	0.0	0.0	0.0	0.0	0.0	1.0	0.0	0.0	0.0	0.0	0.0	0.0	0.0	0.0	1.0	0.0
F2R	2149	symbol	H. sapiens	2149	H. sapiens	F2R	coagulation factor II thrombin receptor	GO:1900134 negative regulation of renin secretion into blood stream;GO:0007529 establishment of synaptic specificity at neuromuscular junction;GO:0099552 trans-synaptic signaling by lipid, modulating synaptic transmission		G-protein coupled receptors:GPCRs excl olfactory receptors; FDA approved drug targets:Small molecule drugs; Predicted intracellular proteins		Streptokinase; SR-123781A; Vorapaxar; Thrombin	(M238)PID THROMBIN PAR1 PATHWAY	(M5902)HALLMARK APOPTOSIS; (M5939)HALLMARK P53 PATHWAY; (M5950)HALLMARK ALLOGRAFT REJECTION	0.0	0.0	0.0	1.0	0.0	1.0	1.0	0.0	1.0	0.0	0.0	0.0	0.0	0.0	0.0	0.0	0.0	0.0	1.0	0.0
SDPR	8436	gene_synonym	H. sapiens	8436	H. sapiens	CAVIN2	caveolae associated protein 2	GO:0097320 plasma membrane tubulation;GO:0007009 plasma membrane organization;GO:0010256 endomembrane system organization		Predicted intracellular proteins	Plasma membrane (Enhanced); Additional: Cytosol			(M5905)HALLMARK ADIPOGENESIS	0.0	0.0	0.0	0.0	0.0	0.0	0.0	0.0	0.0	0.0	0.0	0.0	0.0	0.0	0.0	0.0	0.0	0.0	0.0	0.0
ACTG2	72	symbol	H. sapiens	72	H. sapiens	ACTG2	actin gamma 2, smooth muscle	GO:0090131 mesenchyme migration;GO:0072132 mesenchyme morphogenesis;GO:0090130 tissue migration		Human disease related genes:Congenital malformations:Congenital malformations of the digestive system; Predicted intracellular proteins; Disease related genes			(M16801)SIG REGULATION OF THE ACTIN CYTOSKELETON BY RHO GTPASES	(M5915)HALLMARK APICAL JUNCTION	0.0	0.0	1.0	1.0	0.0	0.0	0.0	1.0	0.0	0.0	0.0	0.0	1.0	0.0	0.0	0.0	0.0	0.0	0.0	0.0
RAB30	27314	symbol	H. sapiens	27314	H. sapiens	RAB30	RAB30, member RAS oncogene family	GO:0032482 Rab protein signal transduction;GO:0007030 Golgi organization;GO:0007265 Ras protein signal transduction		Predicted intracellular proteins	Vesicles (Enhanced)				0.0	0.0	0.0	0.0	0.0	0.0	0.0	0.0	0.0	0.0	0.0	0.0	0.0	0.0	0.0	0.0	0.0	0.0	0.0	0.0
INHBB	3625	symbol	H. sapiens	3625	H. sapiens	INHBB	inhibin subunit beta B	GO:1990636 reproductive senescence;GO:0032646 regulation of hepatocyte growth factor production;GO:0032686 negative regulation of hepatocyte growth factor production		Predicted secreted proteins; Cancer-related genes:Candidate cancer biomarkers			(M5883)NABA SECRETED FACTORS; (M5885)NABA MATRISOME ASSOCIATED; (M5889)NABA MATRISOME	(M5906)HALLMARK ESTROGEN RESPONSE EARLY; (M5939)HALLMARK P53 PATHWAY; (M5950)HALLMARK ALLOGRAFT REJECTION	1.0	0.0	0.0	0.0	0.0	0.0	1.0	0.0	0.0	0.0	0.0	0.0	0.0	0.0	1.0	0.0	1.0	0.0	0.0	1.0
PRSS23	11098	symbol	H. sapiens	11098	H. sapiens	PRSS23	serine protease 23	GO:0006508 proteolysis;GO:0019538 protein metabolic process;GO:1901564 organonitrogen compound metabolic process		Enzymes; Predicted secreted proteins; Predicted intracellular proteins; Peptidases:Serine-type peptidases				(M5946)HALLMARK COAGULATION; (M5906)HALLMARK ESTROGEN RESPONSE EARLY; (M5907)HALLMARK ESTROGEN RESPONSE LATE	0.0	0.0	0.0	0.0	0.0	0.0	0.0	0.0	0.0	0.0	0.0	0.0	1.0	0.0	0.0	0.0	0.0	0.0	0.0	0.0
ALX4	60529	symbol	H. sapiens	60529	H. sapiens	ALX4	ALX homeobox 4	GO:0035116 embryonic hindlimb morphogenesis;GO:0035115 embryonic forelimb morphogenesis;GO:0035137 hindlimb morphogenesis		Transcription factors:Helix-turn-helix domains; Human disease related genes:Congenital malformations:Congenital malformations of the musculoskeletal system; Human disease related genes:Congenital malformations:Other congenital malformations; Disease related genes; Predicted intracellular proteins	Nucleoplasm (Supported)				0.0	1.0	0.0	1.0	0.0	0.0	0.0	0.0	0.0	0.0	0.0	1.0	0.0	0.0	0.0	0.0	0.0	0.0	0.0	0.0
TPD52L1	7164	symbol	H. sapiens	7164	H. sapiens	TPD52L1	TPD52 like 1	GO:0000086 G2/M transition of mitotic cell cycle;GO:0044839 cell cycle G2/M phase transition;GO:0046330 positive regulation of JNK cascade		Predicted intracellular proteins	Cell Junctions;Cytosol;Plasma membrane (Approved)			(M5906)HALLMARK ESTROGEN RESPONSE EARLY; (M5907)HALLMARK ESTROGEN RESPONSE LATE; (M5909)HALLMARK MYOGENESIS	0.0	0.0	0.0	0.0	0.0	0.0	1.0	0.0	0.0	0.0	0.0	0.0	0.0	0.0	0.0	0.0	0.0	0.0	0.0	1.0
DUSP8	1850	symbol	H. sapiens	1850	H. sapiens	DUSP8	dual specificity phosphatase 8	GO:0035335 peptidyl-tyrosine dephosphorylation;GO:0043409 negative regulation of MAPK cascade;GO:0006470 protein dephosphorylation		Enzymes; ENZYME proteins:Hydrolases; Predicted intracellular proteins	Cytosol (Approved)		(M76)PID P38 ALPHA BETA PATHWAY; (M166)PID ATF2 PATHWAY		0.0	0.0	0.0	0.0	0.0	0.0	1.0	0.0	0.0	0.0	0.0	0.0	0.0	0.0	0.0	0.0	0.0	0.0	0.0	0.0
TP53I11	9537	symbol	H. sapiens	9537	H. sapiens	TP53I11	tumor protein p53 inducible protein 11	GO:0008285 negative regulation of cell population proliferation;GO:0042127 regulation of cell population proliferation;GO:0048523 negative regulation of cellular process		Predicted intracellular proteins	Endoplasmic reticulum;Golgi apparatus (Supported)				0.0	0.0	0.0	1.0	0.0	0.0	0.0	0.0	0.0	0.0	0.0	0.0	0.0	0.0	0.0	0.0	0.0	0.0	0.0	0.0
ACVR1C	130399	symbol	H. sapiens	130399	H. sapiens	ACVR1C	activin A receptor type 1C	GO:1901383 negative regulation of chorionic trophoblast cell proliferation;GO:0001834 trophectodermal cell proliferation;GO:1901382 regulation of chorionic trophoblast cell proliferation	TKL Ser/Thr protein kinase family	Enzymes; Predicted intracellular proteins; Kinases:TKL Ser/Thr protein kinases; ENZYME proteins:Transferases					1.0	0.0	0.0	1.0	0.0	1.0	1.0	0.0	0.0	0.0	1.0	0.0	0.0	0.0	1.0	0.0	1.0	1.0	0.0	1.0
SDC2	6383	symbol	H. sapiens	6383	H. sapiens	SDC2	syndecan 2	GO:0048813 dendrite morphogenesis;GO:0048814 regulation of dendrite morphogenesis;GO:0050773 regulation of dendrite development		CD markers	Cytosol;Plasma membrane (Approved)	Sargramostim	(M240)PID SYNDECAN 2 PATHWAY; (M276)PID FGF PATHWAY; (M100)PID SHP2 PATHWAY	(M5942)HALLMARK UV RESPONSE DN; (M5891)HALLMARK HYPOXIA; (M5937)HALLMARK GLYCOLYSIS	0.0	0.0	0.0	0.0	0.0	0.0	0.0	0.0	0.0	1.0	0.0	0.0	0.0	1.0	0.0	0.0	1.0	0.0	0.0	0.0
FAM200B	285550	symbol	H. sapiens	285550	H. sapiens	FAM200B	family with sequence similarity 200 member B			Predicted intracellular proteins					0.0	0.0	0.0	0.0	0.0	0.0	0.0	0.0	0.0	0.0	0.0	0.0	0.0	0.0	0.0	0.0	0.0	0.0	0.0	0.0
RASGRP1	10125	symbol	H. sapiens	10125	H. sapiens	RASGRP1	RAS guanyl releasing protein 1	GO:0032825 positive regulation of natural killer cell differentiation;GO:0033089 positive regulation of T cell differentiation in thymus;GO:0032252 secretory granule localization		RAS pathway related proteins; Predicted intracellular proteins; Disease related genes	Cytosol (Supported); Additional: Plasma membrane		(M269)PID RAS PATHWAY; (M88)PID CD8 TCR PATHWAY; (M34)PID TCR PATHWAY	(M5941)HALLMARK UV RESPONSE UP; (M5906)HALLMARK ESTROGEN RESPONSE EARLY; (M5921)HALLMARK COMPLEMENT	0.0	0.0	0.0	0.0	1.0	1.0	1.0	0.0	0.0	0.0	0.0	0.0	0.0	0.0	0.0	0.0	0.0	0.0	1.0	0.0
KIT	3815	symbol	H. sapiens	3815	H. sapiens	KIT	KIT proto-oncogene, receptor tyrosine kinase	GO:0070662 mast cell proliferation;GO:0097326 melanocyte adhesion;GO:0120071 regulation of pyloric antrum smooth muscle contraction	Tyr protein kinase family	Human disease related genes:Cancers:Cancers of the digestive system; FDA approved drug targets:Small molecule drugs; Cancer-related genes:Mutated cancer genes; CD markers; Cancer-related genes:Candidate cancer biomarkers; Human disease related genes:Immune system diseases:Allergies and autoimmune diseases; Human disease related genes:Cancers:Cancers of haematopoietic and lymphoid tissues; Cancer-…	Plasma membrane (Supported)	Sorafenib; Imatinib; Dasatinib; Sunitinib; Phosphonotyrosine; Nilotinib; XL820; OSI-930; ABT-869; Pazopanib; Midostaurin; Regorafenib; Ponatinib; Lenvatinib; Ancestim; Fostamatinib; Erdafitinib; Amuvatinib; Pexidartinib; Ripretinib; Avapritinib	(M231)PID KIT PATHWAY; (M195)PID CMYB PATHWAY	(M5942)HALLMARK UV RESPONSE DN	1.0	0.0	1.0	0.0	0.0	1.0	1.0	1.0	1.0	1.0	0.0	1.0	1.0	1.0	1.0	1.0	1.0	0.0	1.0	0.0
SHROOM3	57619	symbol	H. sapiens	57619	H. sapiens	SHROOM3	shroom family member 3	GO:0043476 pigment accumulation;GO:0043482 cellular pigment accumulation;GO:0045176 apical protein localization		Predicted intracellular proteins					0.0	0.0	1.0	1.0	0.0	0.0	0.0	0.0	0.0	1.0	0.0	0.0	0.0	0.0	1.0	0.0	0.0	0.0	0.0	0.0
RNF150	57484	symbol	H. sapiens	57484	H. sapiens	RNF150	ring finger protein 150	GO:0006511 ubiquitin-dependent protein catabolic process;GO:0019941 modification-dependent protein catabolic process;GO:0043632 modification-dependent macromolecule catabolic process		Predicted intracellular proteins					0.0	0.0	0.0	0.0	0.0	0.0	0.0	0.0	0.0	0.0	0.0	0.0	0.0	0.0	0.0	0.0	0.0	0.0	0.0	0.0
ROBO1	6091	symbol	H. sapiens	6091	H. sapiens	ROBO1	roundabout guidance receptor 1	GO:0021823 cerebral cortex tangential migration using cell-cell interactions;GO:0021825 substrate-dependent cerebral cortex tangential migration;GO:0021827 postnatal olfactory bulb interneuron migration		Predicted intracellular proteins	Plasma membrane (Enhanced)		(M142)PID AJDISS 2PATHWAY		0.0	0.0	1.0	1.0	0.0	0.0	1.0	1.0	1.0	1.0	1.0	0.0	0.0	1.0	0.0	0.0	1.0	0.0	0.0	0.0
FADS3	3995	symbol	H. sapiens	3995	H. sapiens	FADS3	fatty acid desaturase 3	GO:0006636 unsaturated fatty acid biosynthetic process;GO:0033559 unsaturated fatty acid metabolic process;GO:0006633 fatty acid biosynthetic process		Predicted intracellular proteins	Nucleoli fibrillar center (Approved)				0.0	0.0	0.0	0.0	0.0	0.0	0.0	0.0	0.0	0.0	0.0	0.0	0.0	0.0	0.0	0.0	0.0	0.0	0.0	0.0
MYO1B	4430	symbol	H. sapiens	4430	H. sapiens	MYO1B	myosin IB	GO:0030050 vesicle transport along actin filament;GO:0099515 actin filament-based transport;GO:0051017 actin filament bundle assembly		Predicted intracellular proteins	Plasma membrane (Enhanced)				0.0	0.0	0.0	0.0	0.0	0.0	0.0	0.0	0.0	0.0	0.0	0.0	0.0	0.0	0.0	0.0	0.0	0.0	0.0	0.0
SPINT2	10653	symbol	H. sapiens	10653	H. sapiens	SPINT2	serine peptidase inhibitor, Kunitz type 2	GO:0060671 epithelial cell differentiation involved in embryonic placenta development;GO:0060672 epithelial cell morphogenesis involved in placental branching;GO:0060670 branching involved in labyrinthine layer morphogenesis		Predicted intracellular proteins; Human disease related genes:Digestive system diseases:Gastrointestinal diseases; Disease related genes; Cancer-related genes:Candidate cancer biomarkers	Cytosol;Intermediate filaments;Plasma membrane (Uncertain)			(M5934)HALLMARK XENOBIOTIC METABOLISM	1.0	0.0	1.0	1.0	1.0	0.0	0.0	0.0	0.0	1.0	1.0	1.0	0.0	0.0	1.0	0.0	1.0	0.0	0.0	0.0
SERPINB9	5272	symbol	H. sapiens	5272	H. sapiens	SERPINB9	serpin family B member 9	GO:0042270 protection from natural killer cell mediated cytotoxicity;GO:0071391 cellular response to estrogen stimulus;GO:0045953 negative regulation of natural killer cell mediated cytotoxicity		Predicted intracellular proteins	Nucleoplasm (Approved); Additional: Cytosol	Raloxifene	(M3468)NABA ECM REGULATORS; (M5885)NABA MATRISOME ASSOCIATED; (M5889)NABA MATRISOME		0.0	0.0	0.0	0.0	0.0	0.0	0.0	0.0	0.0	0.0	0.0	0.0	0.0	0.0	0.0	0.0	1.0	0.0	0.0	0.0
CCDC81	60494	symbol	H. sapiens	60494	H. sapiens	CCDC81	coiled-coil domain containing 81			Predicted intracellular proteins					0.0	0.0	0.0	0.0	0.0	0.0	0.0	0.0	0.0	0.0	0.0	0.0	0.0	0.0	0.0	0.0	0.0	0.0	0.0	0.0
LMF1-AS1	101929387	symbol	H. sapiens	101929387	H. sapiens	LMF1-AS1	LMF1 antisense RNA 1								0.0	0.0	0.0	0.0	0.0	0.0	0.0	0.0	0.0	0.0	0.0	0.0	0.0	0.0	0.0	0.0	0.0	0.0	0.0	0.0
EGLN1	54583	symbol	H. sapiens	54583	H. sapiens	EGLN1	egl-9 family hypoxia inducible factor 1	GO:0051344 negative regulation of cyclic-nucleotide phosphodiesterase activity;GO:0032364 oxygen homeostasis;GO:0033483 gas homeostasis		ENZYME proteins:Oxidoreductases; Human disease related genes:Cardiovascular diseases:Hematologic diseases; Disease related genes; Potential drug targets; Enzymes; Predicted intracellular proteins		Ascorbic acid; Iron; Roxadustat; N-[(4-HYDROXY-8-IODOISOQUINOLIN-3-YL)CARBONYL]GLYCINE; FG-2216; Ferrous gluconate; Ferrous succinate; Ferrous ascorbate; Ferrous fumarate; Ferrous glycine sulfate	(M180)PID HIF1A PATHWAY; (M44)PID HIF2PATHWAY; (M255)PID HIF1 TFPATHWAY		0.0	0.0	0.0	0.0	0.0	1.0	0.0	0.0	0.0	0.0	0.0	0.0	0.0	0.0	0.0	0.0	1.0	0.0	0.0	0.0
DCAKD	79877	symbol	H. sapiens	79877	H. sapiens	DCAKD	dephospho-CoA kinase domain containing	GO:0015937 coenzyme A biosynthetic process;GO:0015936 coenzyme A metabolic process;GO:0033866 nucleoside bisphosphate biosynthetic process		Predicted intracellular proteins	Nucleoplasm (Approved)				0.0	0.0	0.0	0.0	0.0	0.0	0.0	0.0	0.0	0.0	0.0	0.0	0.0	0.0	0.0	0.0	0.0	0.0	0.0	0.0
LIMD1	8994	symbol	H. sapiens	8994	H. sapiens	LIMD1	LIM domain containing 1	GO:0035331 negative regulation of hippo signaling;GO:0033962 P-body assembly;GO:0002076 osteoblast development		Predicted intracellular proteins	Focal adhesion sites;Nucleoplasm (Supported)				0.0	0.0	0.0	0.0	0.0	0.0	0.0	0.0	0.0	0.0	0.0	0.0	1.0	0.0	0.0	0.0	0.0	0.0	0.0	0.0
HHAT	55733	symbol	H. sapiens	55733	H. sapiens	HHAT	hedgehog acyltransferase	GO:0006500 N-terminal protein palmitoylation;GO:0018009 N-terminal peptidyl-L-cysteine N-palmitoylation;GO:0006498 N-terminal protein lipidation		Human disease related genes:Congenital malformations:Other congenital malformations; Transporters:Electrochemical Potential-driven transporters; Predicted intracellular proteins	Golgi apparatus (Approved)		(M211)PID HEDGEHOG 2PATHWAY		0.0	0.0	0.0	0.0	0.0	0.0	0.0	0.0	0.0	0.0	0.0	0.0	0.0	0.0	0.0	0.0	0.0	0.0	0.0	0.0
ANKRD1	27063	symbol	H. sapiens	27063	H. sapiens	ANKRD1	ankyrin repeat domain 1	GO:0070528 protein kinase C signaling;GO:0043517 positive regulation of DNA damage response, signal transduction by p53 class mediator;GO:0035994 response to muscle stretch		Predicted intracellular proteins	Nucleoli fibrillar center (Approved); Additional: Nucleoplasm				0.0	1.0	0.0	1.0	0.0	0.0	0.0	0.0	0.0	1.0	0.0	0.0	0.0	0.0	0.0	1.0	1.0	0.0	0.0	1.0
IL7R	3575	symbol	H. sapiens	3575	H. sapiens	IL7R	interleukin 7 receptor	GO:0038111 interleukin-7-mediated signaling pathway;GO:0033089 positive regulation of T cell differentiation in thymus;GO:0001915 negative regulation of T cell mediated cytotoxicity		Human disease related genes:Immune system diseases:Primary immunodeficiency; Cancer-related genes:Mutated cancer genes; CD markers; Disease related genes; Predicted intracellular proteins	Plasma membrane (Supported)			(M5890)HALLMARK TNFA SIGNALING VIA NFKB; (M5932)HALLMARK INFLAMMATORY RESPONSE; (M5953)HALLMARK KRAS SIGNALING UP	0.0	0.0	0.0	0.0	1.0	1.0	0.0	0.0	0.0	1.0	0.0	0.0	0.0	0.0	0.0	0.0	1.0	0.0	1.0	0.0
OGFRL1	79627	symbol	H. sapiens	79627	H. sapiens	OGFRL1	opioid growth factor receptor like 1			Predicted intracellular proteins	Golgi apparatus (Approved); Additional: Nucleoplasm				0.0	0.0	0.0	0.0	0.0	0.0	0.0	0.0	0.0	0.0	0.0	0.0	0.0	0.0	0.0	0.0	0.0	0.0	0.0	0.0
TMEM35	59353	gene_synonym	H. sapiens	59353	H. sapiens	TMEM35A	transmembrane protein 35A	GO:2000010 positive regulation of protein localization to cell surface;GO:0051131 chaperone-mediated protein complex assembly;GO:2000008 regulation of protein localization to cell surface			Vesicles (Supported); Additional: Cytosol;Focal adhesion sites				0.0	0.0	0.0	0.0	0.0	0.0	0.0	0.0	0.0	0.0	0.0	0.0	0.0	0.0	0.0	0.0	0.0	0.0	0.0	0.0
NEDD4L	23327	symbol	H. sapiens	23327	H. sapiens	NEDD4L	NEDD4 like E3 ubiquitin protein ligase	GO:2001288 positive regulation of caveolin-mediated endocytosis;GO:2001286 regulation of caveolin-mediated endocytosis;GO:2000009 negative regulation of protein localization to cell surface		Human disease related genes:Congenital malformations:Congenital malformations of the nervous system; Cancer-related genes:Mutational cancer driver genes; Disease related genes; Potential drug targets; Enzymes; Predicted intracellular proteins; ENZYME proteins:Transferases			(M286)PID TGFBR PATHWAY; (M187)PID TRKR PATHWAY; (M19)PID P73PATHWAY	(M5891)HALLMARK HYPOXIA	0.0	0.0	0.0	0.0	0.0	0.0	0.0	1.0	0.0	0.0	0.0	0.0	0.0	1.0	0.0	0.0	0.0	0.0	0.0	0.0
UNC5B	219699	symbol	H. sapiens	219699	H. sapiens	UNC5B	unc-5 netrin receptor B	GO:0033564 anterior/posterior axon guidance;GO:0038007 netrin-activated signaling pathway;GO:1901099 negative regulation of signal transduction in absence of ligand					(M108)PID NETRIN PATHWAY		0.0	0.0	1.0	0.0	0.0	0.0	0.0	0.0	0.0	1.0	0.0	0.0	0.0	0.0	0.0	0.0	0.0	0.0	0.0	0.0
ZMIZ2	83637	symbol	H. sapiens	83637	H. sapiens	ZMIZ2	zinc finger MIZ-type containing 2	GO:0045944 positive regulation of transcription by RNA polymerase II;GO:0045893 positive regulation of transcription, DNA-templated;GO:1903508 positive regulation of nucleic acid-templated transcription		Predicted intracellular proteins	Nucleoplasm (Supported); Additional: Mitochondria		(M151)PID AR TF PATHWAY		0.0	0.0	0.0	0.0	0.0	0.0	0.0	0.0	0.0	0.0	0.0	0.0	0.0	0.0	0.0	0.0	0.0	0.0	0.0	0.0
BTG2	7832	symbol	H. sapiens	7832	H. sapiens	BTG2	BTG anti-proliferation factor 2	GO:0060213 positive regulation of nuclear-transcribed mRNA poly(A) tail shortening;GO:0060211 regulation of nuclear-transcribed mRNA poly(A) tail shortening;GO:0021542 dentate gyrus development		Predicted intracellular proteins; Cancer-related genes:Candidate cancer biomarkers	Vesicles (Approved); Additional: Nucleoplasm		(M145)PID P53 DOWNSTREAM PATHWAY	(M5941)HALLMARK UV RESPONSE UP; (M5902)HALLMARK APOPTOSIS; (M5890)HALLMARK TNFA SIGNALING VIA NFKB	0.0	1.0	0.0	1.0	0.0	0.0	0.0	0.0	0.0	1.0	0.0	0.0	0.0	0.0	0.0	1.0	0.0	0.0	1.0	0.0
CCDC92	80212	symbol	H. sapiens	80212	H. sapiens	CCDC92	coiled-coil domain containing 92	GO:0050688 regulation of defense response to virus;GO:0002831 regulation of response to biotic stimulus;GO:0031347 regulation of defense response		Predicted intracellular proteins	Centrosome (Supported); Additional: Nucleoplasm				0.0	0.0	0.0	0.0	0.0	0.0	0.0	0.0	0.0	0.0	0.0	0.0	0.0	0.0	0.0	0.0	0.0	0.0	0.0	0.0
DRAM1	55332	symbol	H. sapiens	55332	H. sapiens	DRAM1	DNA damage regulated autophagy modulator 1	GO:0006914 autophagy;GO:0061919 process utilizing autophagic mechanism;GO:0010506 regulation of autophagy		Transporters:Accessory Factors Involved in Transport; Predicted intracellular proteins				(M5890)HALLMARK TNFA SIGNALING VIA NFKB; (M5939)HALLMARK P53 PATHWAY	0.0	0.0	0.0	0.0	0.0	0.0	0.0	0.0	0.0	0.0	0.0	0.0	0.0	0.0	0.0	0.0	0.0	0.0	0.0	0.0
SLC22A18	5002	symbol	H. sapiens	5002	H. sapiens	SLC22A18	solute carrier family 22 member 18	GO:1990961 xenobiotic detoxification by transmembrane export across the plasma membrane;GO:0046618 xenobiotic export;GO:0015695 organic cation transport		Transporters:Electrochemical Potential-driven transporters; Disease related genes; Potential drug targets				(M5948)HALLMARK BILE ACID METABOLISM; (M5942)HALLMARK UV RESPONSE DN	0.0	0.0	0.0	0.0	0.0	0.0	0.0	0.0	0.0	0.0	0.0	0.0	0.0	0.0	0.0	0.0	0.0	0.0	0.0	0.0
CLEC14A	161198	symbol	H. sapiens	161198	H. sapiens	CLEC14A	C-type lectin domain containing 14A	GO:0036325 vascular endothelial growth factor receptor-3 signaling pathway;GO:0036324 vascular endothelial growth factor receptor-2 signaling pathway;GO:0001946 lymphangiogenesis			Endoplasmic reticulum;Golgi apparatus (Supported)	Resveratrol	(M5880)NABA ECM AFFILIATED; (M5885)NABA MATRISOME ASSOCIATED; (M5889)NABA MATRISOME		1.0	0.0	1.0	0.0	0.0	0.0	0.0	0.0	0.0	0.0	0.0	0.0	0.0	0.0	0.0	0.0	1.0	0.0	0.0	0.0
STAT1	6772	symbol	H. sapiens	6772	H. sapiens	STAT1	signal transducer and activator of transcription 1	GO:0046725 negative regulation by virus of viral protein levels in host cell;GO:0072308 negative regulation of metanephric nephron tubule epithelial cell differentiation;GO:0003340 negative regulation of mesenchymal to epithelial transition involved in metanephros morphogenesis		Human disease related genes:Immune system diseases:Primary immunodeficiency; Transcription factors:Immunoglobulin fold; Human disease related genes:Immune system diseases:Other immune system diseases; Disease related genes; Predicted intracellular proteins	Nucleoplasm (Enhanced); Additional: Cytosol		(M36)PID IL27 PATHWAY; (M233)PID EPO PATHWAY; (M127)PID ERBB1 RECEPTOR PROXIMAL PATHWAY	(M5897)HALLMARK IL6 JAK STAT3 SIGNALING; (M5913)HALLMARK INTERFERON GAMMA RESPONSE; (M5950)HALLMARK ALLOGRAFT REJECTION	1.0	0.0	0.0	1.0	1.0	1.0	0.0	1.0	0.0	0.0	0.0	0.0	1.0	0.0	1.0	1.0	1.0	0.0	0.0	0.0
SORT1	6272	symbol	H. sapiens	6272	H. sapiens	SORT1	sortilin 1	GO:0051005 negative regulation of lipoprotein lipase activity;GO:0048227 plasma membrane to endosome transport;GO:0090160 Golgi to lysosome transport		Transporters; Predicted intracellular proteins; Disease related genes; Potential drug targets	Cytosol;Golgi apparatus (Supported); Additional: Plasma membrane		(M153)PID P75 NTR PATHWAY		1.0	1.0	0.0	1.0	0.0	0.0	0.0	0.0	0.0	0.0	0.0	0.0	0.0	0.0	0.0	0.0	0.0	0.0	0.0	0.0
AMIGO1	57463	symbol	H. sapiens	57463	H. sapiens	AMIGO1	adhesion molecule with Ig like domain 1	GO:1905232 cellular response to L-glutamate;GO:1902065 response to L-glutamate;GO:1903818 positive regulation of voltage-gated potassium channel activity		Transporters:Accessory Factors Involved in Transport	Nuclear bodies;Nucleoplasm (Approved)			(M5915)HALLMARK APICAL JUNCTION	0.0	0.0	0.0	0.0	0.0	0.0	0.0	0.0	1.0	1.0	0.0	0.0	0.0	1.0	0.0	0.0	0.0	0.0	0.0	0.0
SVIP	258010	symbol	H. sapiens	258010	H. sapiens	SVIP	small VCP interacting protein	GO:1904239 regulation of VCP-NPL4-UFD1 AAA ATPase complex assembly;GO:1904240 negative regulation of VCP-NPL4-UFD1 AAA ATPase complex assembly;GO:1903070 negative regulation of ER-associated ubiquitin-dependent protein catabolic process		Predicted intracellular proteins					0.0	0.0	0.0	0.0	0.0	0.0	0.0	0.0	0.0	0.0	0.0	0.0	0.0	0.0	0.0	0.0	0.0	0.0	0.0	0.0
GALNT3	2591	symbol	H. sapiens	2591	H. sapiens	GALNT3	polypeptide N-acetylgalactosaminyltransferase 3	GO:0018243 protein O-linked glycosylation via threonine;GO:0018242 protein O-linked glycosylation via serine;GO:0016266 O-glycan processing		Disease related genes; Potential drug targets; Enzymes; Predicted intracellular proteins; ENZYME proteins:Transferases; Human disease related genes:Congenital disorders of metabolism:Other congenital disorders of metabolism	Golgi apparatus (Supported)			(M5953)HALLMARK KRAS SIGNALING UP	1.0	0.0	0.0	1.0	0.0	0.0	0.0	0.0	0.0	0.0	0.0	0.0	0.0	0.0	0.0	0.0	0.0	0.0	0.0	0.0
ATP6V0E2	155066	symbol	H. sapiens	155066	H. sapiens	ATP6V0E2	ATPase H+ transporting V0 subunit e2	GO:0007035 vacuolar acidification;GO:0051452 intracellular pH reduction;GO:0045851 pH reduction							1.0	0.0	0.0	0.0	0.0	0.0	0.0	0.0	0.0	0.0	0.0	0.0	0.0	0.0	0.0	0.0	0.0	0.0	0.0	0.0
LGALS3BP	3959	symbol	H. sapiens	3959	H. sapiens	LGALS3BP	galectin 3 binding protein	GO:0006968 cellular defense response;GO:0006897 endocytosis;GO:0007155 cell adhesion		Predicted secreted proteins; Cancer-related genes:Candidate cancer biomarkers				(M5911)HALLMARK INTERFERON ALPHA RESPONSE; (M5913)HALLMARK INTERFERON GAMMA RESPONSE	0.0	0.0	0.0	0.0	0.0	0.0	0.0	0.0	0.0	0.0	0.0	0.0	0.0	0.0	0.0	0.0	0.0	0.0	0.0	0.0
TRAPPC2	6399	symbol	H. sapiens	6399	H. sapiens	TRAPPC2	trafficking protein particle complex subunit 2	GO:0006888 endoplasmic reticulum to Golgi vesicle-mediated transport;GO:0048193 Golgi vesicle transport;GO:0001501 skeletal system development		Human disease related genes:Congenital malformations:Congenital malformations of the musculoskeletal system; Predicted intracellular proteins; Disease related genes	Endoplasmic reticulum;Vesicles (Approved); Additional: Nucleoplasm				0.0	0.0	0.0	0.0	0.0	0.0	0.0	0.0	0.0	0.0	0.0	1.0	0.0	0.0	0.0	0.0	0.0	0.0	0.0	0.0
ZNF423	23090	symbol	H. sapiens	23090	H. sapiens	ZNF423	zinc finger protein 423	GO:0030513 positive regulation of BMP signaling pathway;GO:0120163 negative regulation of cold-induced thermogenesis;GO:0061512 protein localization to cilium		Human disease related genes:Congenital malformations:Congenital malformations of the nervous system; Human disease related genes:Immune system diseases:Allergies and autoimmune diseases; Transcription factors:Zinc-coordinating DNA-binding domains; Human disease related genes:Congenital malformations:Congenital malformations of the urinary system; Disease related genes; Predicted intracellular pro…	Nucleoplasm (Enhanced)				0.0	0.0	0.0	1.0	0.0	0.0	0.0	0.0	0.0	0.0	0.0	0.0	0.0	0.0	1.0	0.0	1.0	0.0	0.0	0.0
FLOT2	2319	symbol	H. sapiens	2319	H. sapiens	FLOT2	flotillin 2	GO:1903905 positive regulation of establishment of T cell polarity;GO:0044860 protein localization to plasma membrane raft;GO:1903903 regulation of establishment of T cell polarity		Predicted intracellular proteins	Plasma membrane (Supported); Additional: Vesicles		(M1315)SIG PIP3 SIGNALING IN B LYMPHOCYTES; (M8626)SIG BCR SIGNALING PATHWAY; (M7955)SIG INSULIN RECEPTOR PATHWAY IN CARDIAC MYOCYTES	(M5916)HALLMARK APICAL SURFACE	0.0	0.0	0.0	0.0	1.0	0.0	1.0	0.0	0.0	0.0	0.0	0.0	0.0	0.0	0.0	0.0	0.0	0.0	0.0	0.0
DLC1	10395	symbol	H. sapiens	10395	H. sapiens	DLC1	DLC1 Rho GTPase activating protein	GO:1900119 positive regulation of execution phase of apoptosis;GO:0051895 negative regulation of focal adhesion assembly;GO:0150118 negative regulation of cell-substrate junction organization		Predicted intracellular proteins; Cancer-related genes:Candidate cancer biomarkers	Cytosol;Vesicles (Approved); Additional: Nucleoplasm		(M68)PID RHOA REG PATHWAY	(M5942)HALLMARK UV RESPONSE DN; (M5906)HALLMARK ESTROGEN RESPONSE EARLY	0.0	0.0	1.0	1.0	1.0	0.0	0.0	0.0	1.0	0.0	1.0	0.0	0.0	0.0	0.0	0.0	1.0	0.0	0.0	1.0
ELOVL2	54898	symbol	H. sapiens	54898	H. sapiens	ELOVL2	ELOVL fatty acid elongase 2	GO:0019367 fatty acid elongation, saturated fatty acid;GO:0019368 fatty acid elongation, unsaturated fatty acid;GO:0034625 fatty acid elongation, monounsaturated fatty acid		Enzymes; ENZYME proteins:Transferases		alpha-Linolenic acid		(M5906)HALLMARK ESTROGEN RESPONSE EARLY	0.0	0.0	0.0	0.0	0.0	0.0	0.0	0.0	0.0	0.0	0.0	0.0	0.0	0.0	0.0	0.0	0.0	0.0	0.0	0.0
BMP4	652	symbol	H. sapiens	652	H. sapiens	BMP4	bone morphogenetic protein 4	GO:0048390 intermediate mesoderm morphogenesis;GO:0048391 intermediate mesoderm formation;GO:0048392 intermediate mesodermal cell differentiation		Human disease related genes:Congenital malformations:Congenital malformations of eye; Cancer-related genes:Candidate cancer biomarkers; Predicted secreted proteins; Disease related genes; Human disease related genes:Congenital malformations:Congenital malformations of face and neck; Predicted intracellular proteins		Calcium	(M181)PID BMP PATHWAY; (M5883)NABA SECRETED FACTORS; (M5885)NABA MATRISOME ASSOCIATED		1.0	1.0	1.0	1.0	1.0	1.0	1.0	1.0	0.0	1.0	1.0	1.0	0.0	1.0	1.0	0.0	1.0	1.0	1.0	1.0
ERAP2	64167	symbol	H. sapiens	64167	H. sapiens	ERAP2	endoplasmic reticulum aminopeptidase 2	GO:0019885 antigen processing and presentation of endogenous peptide antigen via MHC class I;GO:0002483 antigen processing and presentation of endogenous peptide antigen;GO:0019883 antigen processing and presentation of endogenous antigen		Enzymes; Predicted secreted proteins; Predicted intracellular proteins; Peptidases:Metallopeptidases	Golgi apparatus (Approved)			(M5921)HALLMARK COMPLEMENT	0.0	0.0	0.0	0.0	0.0	0.0	0.0	0.0	0.0	0.0	0.0	0.0	0.0	0.0	0.0	0.0	0.0	0.0	0.0	0.0
STS	412	symbol	H. sapiens	412	H. sapiens	STS	steroid sulfatase	GO:0006706 steroid catabolic process;GO:0007565 female pregnancy;GO:0044706 multi-multicellular organism process		ENZYME proteins:Hydrolases; Human disease related genes:Congenital disorders of metabolism:Congenital disorders of lipid/glycolipid metabolism; Human disease related genes:Congenital malformations:Congenital malformations of skin; Disease related genes; Potential drug targets; Enzymes		Irosustat; 2-Amino-3-Oxo-4-Sulfo-Butyric Acid		(M5949)HALLMARK PEROXISOME	0.0	0.0	0.0	0.0	0.0	0.0	0.0	0.0	0.0	0.0	0.0	0.0	0.0	0.0	0.0	0.0	0.0	0.0	0.0	0.0
EPB41L5	57669	symbol	H. sapiens	57669	H. sapiens	EPB41L5	erythrocyte membrane protein band 4.1 like 5	GO:0006931 substrate-dependent cell migration, cell attachment to substrate;GO:0007509 mesoderm migration involved in gastrulation;GO:0009826 unidimensional cell growth		Predicted intracellular proteins	Plasma membrane (Enhanced)				0.0	0.0	1.0	1.0	1.0	0.0	0.0	1.0	1.0	1.0	1.0	1.0	0.0	1.0	1.0	0.0	0.0	1.0	0.0	0.0
PPP2R2B	5521	symbol	H. sapiens	5521	H. sapiens	PPP2R2B	protein phosphatase 2 regulatory subunit Bbeta	GO:0070262 peptidyl-serine dephosphorylation;GO:0006470 protein dephosphorylation;GO:0016311 dephosphorylation		Predicted intracellular proteins; Human disease related genes:Nervous system diseases:Neurodegenerative diseases; Disease related genes	Cytosol (Uncertain)		(M46)PID ATR PATHWAY; (M186)PID PDGFRB PATHWAY		0.0	0.0	0.0	0.0	0.0	0.0	0.0	0.0	0.0	0.0	0.0	0.0	0.0	0.0	0.0	0.0	0.0	0.0	0.0	0.0
RGMB-AS1	503569	symbol	H. sapiens	503569	H. sapiens	RGMB-AS1	RGMB antisense RNA 1								0.0	0.0	0.0	0.0	0.0	0.0	0.0	0.0	0.0	0.0	0.0	0.0	0.0	0.0	0.0	0.0	0.0	0.0	0.0	0.0
FDXR	2232	symbol	H. sapiens	2232	H. sapiens	FDXR	ferredoxin reductase	GO:0006744 ubiquinone biosynthetic process;GO:1901663 quinone biosynthetic process;GO:0006743 ubiquinone metabolic process		Human disease related genes:Nervous system diseases:Ear disease; ENZYME proteins:Oxidoreductases; Disease related genes; Potential drug targets; Enzymes; Predicted intracellular proteins	Mitochondria (Enhanced)	Flavin adenine dinucleotide; Nicotinamide adenine dinucleotide phosphate	(M256)PID TAP63 PATHWAY; (M145)PID P53 DOWNSTREAM PATHWAY	(M5948)HALLMARK BILE ACID METABOLISM; (M5902)HALLMARK APOPTOSIS; (M5924)HALLMARK MTORC1 SIGNALING	0.0	0.0	0.0	0.0	0.0	0.0	0.0	0.0	0.0	0.0	0.0	0.0	0.0	0.0	0.0	0.0	0.0	0.0	0.0	0.0
FBXO44	93611	symbol	H. sapiens	93611	H. sapiens	FBXO44	F-box protein 44	GO:0006516 glycoprotein catabolic process;GO:0031146 SCF-dependent proteasomal ubiquitin-dependent protein catabolic process;GO:0030433 ubiquitin-dependent ERAD pathway		Predicted intracellular proteins	Nucleoplasm (Approved)				0.0	0.0	0.0	0.0	0.0	0.0	0.0	0.0	0.0	0.0	0.0	0.0	0.0	0.0	0.0	0.0	0.0	0.0	0.0	0.0
MAMDC2	256691	symbol	H. sapiens	256691	H. sapiens	MAMDC2	MAM domain containing 2			Predicted secreted proteins	Nuclear speckles;Plasma membrane (Approved)				0.0	0.0	0.0	0.0	0.0	0.0	0.0	0.0	0.0	0.0	0.0	0.0	0.0	0.0	0.0	0.0	0.0	0.0	0.0	0.0
RARB	5915	symbol	H. sapiens	5915	H. sapiens	RARB	retinoic acid receptor beta	GO:0055012 ventricular cardiac muscle cell differentiation;GO:0048384 retinoic acid receptor signaling pathway;GO:0021756 striatum development		Human disease related genes:Congenital malformations:Congenital malformations of eye; Human disease related genes:Cancers:Cancers of the digestive system; FDA approved drug targets:Small molecule drugs; Cancer-related genes:Candidate cancer biomarkers; Transcription factors:Zinc-coordinating DNA-binding domains; Disease related genes; Nuclear receptors; Human disease related genes:Cancers:Cancers…	Nucleoplasm (Enhanced)	Adapalene; Acitretin; Alitretinoin; Tretinoin; Tazarotene; Etretinate; Arotinoid acid; Tamibarotene; LGD-1550; Trifarotene	(M162)PID RXR VDR PATHWAY; (M207)PID RETINOIC ACID PATHWAY		0.0	1.0	0.0	1.0	0.0	1.0	0.0	0.0	0.0	0.0	0.0	1.0	0.0	0.0	1.0	0.0	1.0	1.0	1.0	1.0
LRRC32	2615	symbol	H. sapiens	2615	H. sapiens	LRRC32	leucine rich repeat containing 32	GO:1901398 regulation of transforming growth factor beta3 activation;GO:0032910 regulation of transforming growth factor beta3 production;GO:1901388 regulation of transforming growth factor beta activation		Predicted intracellular proteins	Nucleoplasm (Enhanced)				1.0	0.0	0.0	1.0	1.0	0.0	0.0	0.0	0.0	0.0	0.0	0.0	0.0	0.0	0.0	0.0	1.0	0.0	0.0	0.0
PLD1	5337	symbol	H. sapiens	5337	H. sapiens	PLD1	phospholipase D1	GO:0032534 regulation of microvillus assembly;GO:0098693 regulation of synaptic vesicle cycle;GO:0032530 regulation of microvillus organization		ENZYME proteins:Hydrolases; Human disease related genes:Congenital malformations:Congenital malformations of the circulatory system; Disease related genes; Potential drug targets; Enzymes; RAS pathway related proteins; Predicted intracellular proteins	Vesicles (Approved); Additional: Nucleoplasm	Choline; LAX-101; Choline salicylate	(M120)PID ARF6 DOWNSTREAM PATHWAY; (M252)PID IL8 CXCR1 PATHWAY; (M275)PID ALPHA SYNUCLEIN PATHWAY		0.0	0.0	0.0	0.0	0.0	1.0	0.0	0.0	0.0	1.0	0.0	0.0	0.0	1.0	0.0	0.0	0.0	0.0	0.0	0.0
B9D1	27077	symbol	H. sapiens	27077	H. sapiens	B9D1	B9 domain containing 1	GO:0060563 neuroepithelial cell differentiation;GO:0042733 embryonic digit morphogenesis;GO:0007224 smoothened signaling pathway		Human disease related genes:Congenital malformations:Congenital malformations of the nervous system; Predicted intracellular proteins; Disease related genes; Human disease related genes:Congenital malformations:Congenital malformations of the urinary system					0.0	0.0	1.0	1.0	0.0	0.0	0.0	0.0	0.0	0.0	0.0	1.0	0.0	0.0	1.0	0.0	1.0	0.0	0.0	0.0
SRF	6722	symbol	H. sapiens	6722	H. sapiens	SRF	serum response factor	GO:0060532 bronchus cartilage development;GO:0061145 lung smooth muscle development;GO:0010735 positive regulation of transcription via serum response element binding		Transcription factors:alpha-Helices exposed by beta-structures; Predicted intracellular proteins	Nucleoplasm (Supported)		(M199)PID P38 MK2 PATHWAY; (M206)PID PDGFRA PATHWAY; (M30)PID HDAC CLASSII PATHWAY	(M5908)HALLMARK ANDROGEN RESPONSE	1.0	1.0	1.0	1.0	1.0	0.0	0.0	1.0	1.0	1.0	1.0	1.0	0.0	1.0	1.0	0.0	1.0	1.0	1.0	0.0
FOXC2	2303	symbol	H. sapiens	2303	H. sapiens	FOXC2	forkhead box C2	GO:1902257 negative regulation of apoptotic process involved in outflow tract morphogenesis;GO:0048342 paraxial mesodermal cell differentiation;GO:0048343 paraxial mesodermal cell fate commitment		Human disease related genes:Congenital malformations:Congenital malformations of skin; Transcription factors:Helix-turn-helix domains; Predicted intracellular proteins; Disease related genes	Nuclear bodies;Nucleoplasm (Supported)			(M5930)HALLMARK EPITHELIAL MESENCHYMAL TRANSITION	1.0	1.0	1.0	1.0	1.0	1.0	0.0	1.0	0.0	0.0	1.0	1.0	0.0	0.0	1.0	0.0	1.0	1.0	0.0	0.0
PCDH19	57526	symbol	H. sapiens	57526	H. sapiens	PCDH19	protocadherin 19	GO:0007156 homophilic cell adhesion via plasma membrane adhesion molecules;GO:0098742 cell-cell adhesion via plasma-membrane adhesion molecules;GO:0098609 cell-cell adhesion		Human disease related genes:Nervous system diseases:Epilepsy; Predicted intracellular proteins; Disease related genes	Cytosol (Approved)	Calcium			0.0	0.0	0.0	0.0	0.0	0.0	0.0	0.0	1.0	1.0	0.0	0.0	0.0	0.0	0.0	0.0	0.0	0.0	0.0	0.0
DHCR7	1717	symbol	H. sapiens	1717	H. sapiens	DHCR7	7-dehydrocholesterol reductase	GO:0016128 phytosteroid metabolic process;GO:0016129 phytosteroid biosynthetic process;GO:0016131 brassinosteroid metabolic process		ENZYME proteins:Oxidoreductases; Human disease related genes:Congenital disorders of metabolism:Congenital disorders of lipid/glycolipid metabolism; Disease related genes; Potential drug targets; Enzymes	Endoplasmic reticulum (Supported)	NADH		(M5892)HALLMARK CHOLESTEROL HOMEOSTASIS; (M5905)HALLMARK ADIPOGENESIS; (M5906)HALLMARK ESTROGEN RESPONSE EARLY	0.0	0.0	0.0	0.0	0.0	0.0	0.0	0.0	0.0	0.0	0.0	0.0	0.0	0.0	0.0	0.0	0.0	0.0	0.0	0.0
NOV	4856	gene_synonym	H. sapiens	4856	H. sapiens	CCN3	cellular communication network factor 3	GO:1904057 negative regulation of sensory perception of pain;GO:1990523 bone regeneration;GO:0048659 smooth muscle cell proliferation		Transporters:Accessory Factors Involved in Transport; Predicted secreted proteins	Vesicles (Enhanced)	Insulin pork	(M3008)NABA ECM GLYCOPROTEINS; (M5884)NABA CORE MATRISOME; (M5889)NABA MATRISOME		0.0	0.0	1.0	1.0	0.0	1.0	0.0	1.0	1.0	1.0	1.0	1.0	0.0	0.0	1.0	0.0	1.0	1.0	1.0	0.0
NCKAP5	344148	symbol	H. sapiens	344148	H. sapiens	NCKAP5	NCK associated protein 5	GO:0007019 microtubule depolymerization;GO:0051261 protein depolymerization;GO:0043624 cellular protein complex disassembly		Predicted intracellular proteins	Nucleoli (Approved); Additional: Cytosol;Golgi apparatus;Plasma membrane				0.0	0.0	0.0	0.0	0.0	0.0	0.0	0.0	0.0	0.0	0.0	0.0	0.0	0.0	0.0	0.0	0.0	0.0	0.0	0.0
ANKRD33B	651746	symbol	H. sapiens	651746	H. sapiens	ANKRD33B	ankyrin repeat domain 33B			Predicted intracellular proteins	Mitochondria (Approved)				0.0	0.0	0.0	0.0	0.0	0.0	0.0	0.0	0.0	0.0	0.0	0.0	0.0	0.0	0.0	0.0	0.0	0.0	0.0	0.0
LINC00346	283487	gene_synonym	H. sapiens	283487	H. sapiens	PRECSIT	p53 regulated carcinoma associated Stat3 activating long intergenic non-protein coding transcript								0.0	0.0	0.0	0.0	0.0	0.0	0.0	0.0	0.0	0.0	0.0	0.0	0.0	0.0	0.0	0.0	0.0	0.0	0.0	0.0
CHST15	51363	symbol	H. sapiens	51363	H. sapiens	CHST15	carbohydrate sulfotransferase 15	GO:0030206 chondroitin sulfate biosynthetic process;GO:0050650 chondroitin sulfate proteoglycan biosynthetic process;GO:0030204 chondroitin sulfate metabolic process		Enzymes; Predicted intracellular proteins; ENZYME proteins:Transferases	Cytosol (Approved); Additional: Centrosome				0.0	0.0	0.0	0.0	0.0	0.0	0.0	0.0	0.0	0.0	0.0	0.0	0.0	0.0	0.0	0.0	0.0	0.0	0.0	0.0
TCF7L1	83439	symbol	H. sapiens	83439	H. sapiens	TCF7L1	transcription factor 7 like 1	GO:0060070 canonical Wnt signaling pathway;GO:0016055 Wnt signaling pathway;GO:0198738 cell-cell signaling by wnt		Transcription factors:Other all-alpha-helical DNA-binding domains; Predicted intracellular proteins	Nucleoplasm (Supported); Additional: Cytosol		(M236)PID DELTA NP63 PATHWAY; (M223)PID BETA CATENIN NUC PATHWAY; (M5493)WNT SIGNALING	(M5956)HALLMARK KRAS SIGNALING DN	0.0	0.0	0.0	0.0	0.0	1.0	0.0	0.0	0.0	0.0	0.0	0.0	1.0	0.0	1.0	0.0	0.0	0.0	0.0	0.0
JUP	3728	symbol	H. sapiens	3728	H. sapiens	JUP	junction plakoglobin	GO:0071603 endothelial cell-cell adhesion;GO:0002159 desmosome assembly;GO:0071681 cellular response to indole-3-methanol		Cancer-related genes:Candidate cancer biomarkers; Human disease related genes:Congenital malformations:Congenital malformations of the circulatory system; Human disease related genes:Cardiovascular diseases:Cardiac diseases; Disease related genes; Predicted intracellular proteins	Cell Junctions;Plasma membrane (Supported); Additional: Vesicles	Zinc; Zinc acetate	(M184)PID ECADHERIN KERATINOCYTE PATHWAY; (M266)PID NCADHERIN PATHWAY; (M156)PID ECADHERIN NASCENT AJ PATHWAY	(M5915)HALLMARK APICAL JUNCTION; (M5934)HALLMARK XENOBIOTIC METABOLISM; (M5953)HALLMARK KRAS SIGNALING UP	1.0	0.0	0.0	0.0	1.0	1.0	0.0	0.0	1.0	0.0	1.0	0.0	0.0	0.0	0.0	1.0	0.0	0.0	1.0	0.0
FGF2	2247	symbol	H. sapiens	2247	H. sapiens	FGF2	fibroblast growth factor 2	GO:0014843 growth factor dependent regulation of skeletal muscle satellite cell proliferation;GO:1902748 positive regulation of lens fiber cell differentiation;GO:0042660 positive regulation of cell fate specification		FDA approved drug targets:Small molecule drugs; Candidate cardiovascular disease genes; Cancer-related genes:Candidate cancer biomarkers; Predicted secreted proteins; RAS pathway related proteins; Transporters:Transporter channels and pores; Predicted intracellular proteins	Nuclear bodies;Nucleoplasm (Supported)	Sucralfate; Pentosan polysulfate; Sirolimus; Heparin; 1,4-Dideoxy-O2-Sulfo-Glucuronic Acid; N,O6-Disulfo-Glucosamine; 1,4-Dideoxy-5-Dehydro-O2-Sulfo-Glucuronic Acid; ABT-510	(M33)PID GLYPICAN 1PATHWAY; (M165)PID SYNDECAN 4 PATHWAY; (M92)PID ANGIOPOIETIN RECEPTOR PATHWAY	(M5909)HALLMARK MYOGENESIS; (M5930)HALLMARK EPITHELIAL MESENCHYMAL TRANSITION	1.0	0.0	1.0	1.0	0.0	1.0	1.0	1.0	0.0	1.0	1.0	1.0	1.0	0.0	1.0	0.0	1.0	0.0	0.0	0.0
KLF2	10365	symbol	H. sapiens	10365	H. sapiens	KLF2	Kruppel like factor 2	GO:0071409 cellular response to cycloheximide;GO:0097532 stress response to acid chemical;GO:0097533 cellular stress response to acid chemical		Predicted intracellular proteins; Transcription factors:Zinc-coordinating DNA-binding domains	Nucleoplasm (Approved)			(M5890)HALLMARK TNFA SIGNALING VIA NFKB	0.0	0.0	0.0	1.0	0.0	0.0	0.0	0.0	0.0	1.0	0.0	0.0	0.0	0.0	1.0	0.0	0.0	1.0	1.0	0.0
ZNF717	100131827	symbol	H. sapiens	100131827	H. sapiens	ZNF717	zinc finger protein 717	GO:0045944 positive regulation of transcription by RNA polymerase II;GO:0045893 positive regulation of transcription, DNA-templated;GO:1903508 positive regulation of nucleic acid-templated transcription		Predicted intracellular proteins	Nuclear bodies;Nucleoplasm (Approved); Additional: Plasma membrane				0.0	0.0	0.0	0.0	0.0	0.0	0.0	0.0	0.0	0.0	0.0	0.0	0.0	0.0	0.0	0.0	0.0	0.0	0.0	0.0
NLRP10	338322	symbol	H. sapiens	338322	H. sapiens	NLRP10	NLR family pyrin domain containing 10	GO:0032730 positive regulation of interleukin-1 alpha production;GO:0032650 regulation of interleukin-1 alpha production;GO:1900426 positive regulation of defense response to bacterium		Predicted intracellular proteins	Nucleoplasm (Approved); Additional: Nuclear membrane				0.0	0.0	0.0	0.0	0.0	0.0	0.0	0.0	0.0	0.0	0.0	0.0	0.0	0.0	0.0	0.0	0.0	0.0	0.0	0.0
PHC2	1912	symbol	H. sapiens	1912	H. sapiens	PHC2	polyhomeotic homolog 2	GO:0045892 negative regulation of transcription, DNA-templated;GO:1903507 negative regulation of nucleic acid-templated transcription;GO:1902679 negative regulation of RNA biosynthetic process		Predicted intracellular proteins	Nucleoplasm (Supported)				0.0	0.0	0.0	0.0	0.0	0.0	0.0	0.0	0.0	0.0	0.0	0.0	0.0	0.0	0.0	0.0	0.0	0.0	0.0	0.0
KCNS1	3787	symbol	H. sapiens	3787	H. sapiens	KCNS1	potassium voltage-gated channel modifier subfamily S member 1	GO:1902259 regulation of delayed rectifier potassium channel activity;GO:1901016 regulation of potassium ion transmembrane transporter activity;GO:1901379 regulation of potassium ion transmembrane transport		Transporters:Transporter channels and pores; Voltage-gated ion channels:Voltage-Gated Potassium Channels					0.0	0.0	0.0	0.0	0.0	0.0	0.0	0.0	0.0	0.0	0.0	0.0	0.0	0.0	0.0	0.0	0.0	0.0	0.0	0.0
EML4	27436	symbol	H. sapiens	27436	H. sapiens	EML4	EMAP like 4	GO:0008608 attachment of spindle microtubules to kinetochore;GO:0007080 mitotic metaphase plate congression;GO:0051310 metaphase plate congression		Predicted intracellular proteins; Cancer-related genes	Microtubules (Supported); Additional: Cytosol				0.0	0.0	0.0	0.0	0.0	1.0	0.0	0.0	0.0	0.0	0.0	0.0	0.0	0.0	0.0	0.0	0.0	0.0	0.0	0.0
ADCY4	196883	symbol	H. sapiens	196883	H. sapiens	ADCY4	adenylate cyclase 4	GO:0006171 cAMP biosynthetic process;GO:0009190 cyclic nucleotide biosynthetic process;GO:0046058 cAMP metabolic process		Enzymes; ENZYME proteins:Lyases; Predicted intracellular proteins			(M56)PID LPA4 PATHWAY; (M8)PID ENDOTHELIN PATHWAY; (M15)PID LYSOPHOSPHOLIPID PATHWAY		0.0	0.0	0.0	0.0	0.0	1.0	0.0	0.0	0.0	0.0	0.0	0.0	0.0	0.0	0.0	0.0	1.0	0.0	0.0	0.0
TNFRSF10B	8795	symbol	H. sapiens	8795	H. sapiens	TNFRSF10B	TNF receptor superfamily member 10b	GO:0036462 TRAIL-activated apoptotic signaling pathway;GO:0007250 activation of NF-kappaB-inducing kinase activity;GO:0070059 intrinsic apoptotic signaling pathway in response to endoplasmic reticulum stress		Disease related genes; CD markers; Cancer-related genes:Candidate cancer biomarkers		HGS-TR2J; Lexatumumab	(M79)PID TRAIL PATHWAY; (M145)PID P53 DOWNSTREAM PATHWAY		0.0	0.0	0.0	0.0	0.0	0.0	1.0	0.0	0.0	0.0	0.0	0.0	0.0	0.0	0.0	1.0	1.0	0.0	0.0	1.0
AMOT	154796	symbol	H. sapiens	154796	H. sapiens	AMOT	angiomotin	GO:0003365 establishment of cell polarity involved in ameboidal cell migration;GO:0042074 cell migration involved in gastrulation;GO:0035329 hippo signaling		Predicted intracellular proteins	Cell Junctions (Supported); Additional: Nucleoplasm			(M5919)HALLMARK HEDGEHOG SIGNALING	0.0	0.0	1.0	1.0	0.0	0.0	0.0	0.0	0.0	1.0	0.0	0.0	1.0	0.0	0.0	0.0	0.0	0.0	0.0	0.0
SHISA4	149345	symbol	H. sapiens	149345	H. sapiens	SHISA4	shisa family member 4								0.0	0.0	0.0	0.0	0.0	0.0	0.0	0.0	0.0	0.0	0.0	0.0	0.0	0.0	0.0	0.0	0.0	0.0	0.0	0.0
LY6K	54742	symbol	H. sapiens	54742	H. sapiens	LY6K	lymphocyte antigen 6 family member K	GO:0007339 binding of sperm to zona pellucida;GO:0035036 sperm-egg recognition;GO:0009988 cell-cell recognition		Predicted secreted proteins	Plasma membrane (Approved); Additional: Nucleoplasm				0.0	0.0	0.0	0.0	0.0	0.0	0.0	0.0	0.0	0.0	0.0	0.0	0.0	0.0	0.0	0.0	0.0	0.0	0.0	0.0
AJUBA	84962	symbol	H. sapiens	84962	H. sapiens	AJUBA	ajuba LIM protein	GO:0035313 wound healing, spreading of epidermal cells;GO:0035331 negative regulation of hippo signaling;GO:1900037 regulation of cellular response to hypoxia		Predicted intracellular proteins; Cancer-related genes:Mutational cancer driver genes; Cancer-related genes:Mutated cancer genes	Golgi apparatus;Nucleoplasm (Approved)		(M184)PID ECADHERIN KERATINOCYTE PATHWAY; (M242)PID AURORA A PATHWAY		0.0	0.0	0.0	1.0	0.0	0.0	1.0	0.0	1.0	1.0	0.0	0.0	1.0	1.0	0.0	0.0	1.0	0.0	0.0	0.0

## Sheet: Enrichment
GroupID	Category	Term	Description	LogP	Log(q-value)	InTerm_InList	Genes	Symbols
1_Summary	GO Biological Processes	GO:0007167	enzyme linked receptor protein signaling pathway	-12.4011	-8.05441	25/601	558,652,1947,2247,2250,2303,2591,2615,2674,3625,3815,3976,4739,4915,6272,7042,7157,10019,10370,10468,84159,130399,161198,255324,401474,3728,5664,6722,6772,10653,26999,155066,9052	AXL,BMP4,EFNB1,FGF2,FGF5,FOXC2,GALNT3,LRRC32,GFRA1,INHBB,KIT,LIF,NEDD9,NTRK2,SORT1,TGFB2,TP53,SH2B3,CITED2,FST,ARID5B,ACVR1C,CLEC14A,EPGN,SAMD12,JUP,PSEN2,SRF,STAT1,SPINT2,CYFIP2,ATP6V0E2,GPRC5A
1_Member	GO Biological Processes	GO:0007167	enzyme linked receptor protein signaling pathway	-12.4011	-8.05441	25/601	558,652,1947,2247,2250,2303,2591,2615,2674,3625,3815,3976,4739,4915,6272,7042,7157,10019,10370,10468,84159,130399,161198,255324,401474	AXL,BMP4,EFNB1,FGF2,FGF5,FOXC2,GALNT3,LRRC32,GFRA1,INHBB,KIT,LIF,NEDD9,NTRK2,SORT1,TGFB2,TP53,SH2B3,CITED2,FST,ARID5B,ACVR1C,CLEC14A,EPGN,SAMD12
1_Member	GO Biological Processes	GO:0007169	transmembrane receptor protein tyrosine kinase signaling pathway	-7.80588	-4.71447	16/403	558,1947,2247,2250,2303,2591,2674,3815,4739,4915,6272,10019,84159,161198,255324,401474	AXL,EFNB1,FGF2,FGF5,FOXC2,GALNT3,GFRA1,KIT,NEDD9,NTRK2,SORT1,SH2B3,ARID5B,CLEC14A,EPGN,SAMD12
1_Member	Reactome Gene Sets	R-HSA-9006934	Signaling by Receptor Tyrosine Kinases	-5.58558	-3.08399	15/521	558,2247,2250,2591,3728,3815,4915,5664,6722,6772,10019,10653,26999,155066,255324	AXL,FGF2,FGF5,GALNT3,JUP,KIT,NTRK2,PSEN2,SRF,STAT1,SH2B3,SPINT2,CYFIP2,ATP6V0E2,EPGN
1_Member	GO Biological Processes	GO:0050730	regulation of peptidyl-tyrosine phosphorylation	-3.40377	-1.54563	8/261	2674,3815,3976,4739,7157,9052,10019,255324	GFRA1,KIT,LIF,NEDD9,TP53,GPRC5A,SH2B3,EPGN
1_Member	GO Biological Processes	GO:0050731	positive regulation of peptidyl-tyrosine phosphorylation	-2.74241	-1.08414	6/190	2674,3815,3976,4739,7157,255324	GFRA1,KIT,LIF,NEDD9,TP53,EPGN
2_Summary	GO Biological Processes	GO:0061061	muscle structure development	-10.8797	-6.83407	21/480	182,274,467,652,2273,2303,3679,3756,3976,4223,5915,6272,6722,7042,7134,7832,10370,27063,60529,84159,84665,10052	JAG1,BIN1,ATF3,BMP4,FHL1,FOXC2,ITGA7,KCNH1,LIF,MEOX2,RARB,SORT1,SRF,TGFB2,TNNC1,BTG2,CITED2,ANKRD1,ALX4,ARID5B,MYPN,GJC1
2_Member	GO Biological Processes	GO:0061061	muscle structure development	-10.8797	-6.83407	21/480	182,274,467,652,2273,2303,3679,3756,3976,4223,5915,6272,6722,7042,7134,7832,10370,27063,60529,84159,84665	JAG1,BIN1,ATF3,BMP4,FHL1,FOXC2,ITGA7,KCNH1,LIF,MEOX2,RARB,SORT1,SRF,TGFB2,TNNC1,BTG2,CITED2,ANKRD1,ALX4,ARID5B,MYPN
2_Member	GO Biological Processes	GO:0007517	muscle organ development	-7.13305	-4.27179	13/285	467,2273,2303,3679,3976,4223,7042,7134,7832,10370,27063,60529,84159	ATF3,FHL1,FOXC2,ITGA7,LIF,MEOX2,TGFB2,TNNC1,BTG2,CITED2,ANKRD1,ALX4,ARID5B
2_Member	GO Biological Processes	GO:0014706	striated muscle tissue development	-7.09778	-4.25624	13/287	467,652,2303,3679,4223,5915,6722,7042,7134,7832,10052,10370,27063	ATF3,BMP4,FOXC2,ITGA7,MEOX2,RARB,SRF,TGFB2,TNNC1,BTG2,GJC1,CITED2,ANKRD1
2_Member	GO Biological Processes	GO:0060537	muscle tissue development	-6.77638	-4.03713	13/306	467,652,2303,3679,4223,5915,6722,7042,7134,7832,10052,10370,27063	ATF3,BMP4,FOXC2,ITGA7,MEOX2,RARB,SRF,TGFB2,TNNC1,BTG2,GJC1,CITED2,ANKRD1
2_Member	GO Biological Processes	GO:0048738	cardiac muscle tissue development	-4.64029	-2.41088	8/173	652,2303,5915,6722,7042,7134,10052,27063	BMP4,FOXC2,RARB,SRF,TGFB2,TNNC1,GJC1,ANKRD1
2_Member	GO Biological Processes	GO:0007519	skeletal muscle tissue development	-3.79328	-1.81395	6/120	467,3679,4223,7832,10370,27063	ATF3,ITGA7,MEOX2,BTG2,CITED2,ANKRD1
2_Member	GO Biological Processes	GO:0060538	skeletal muscle organ development	-3.58638	-1.66621	6/131	467,3679,4223,7832,10370,27063	ATF3,ITGA7,MEOX2,BTG2,CITED2,ANKRD1
2_Member	GO Biological Processes	GO:0035914	skeletal muscle cell differentiation	-3.55861	-1.64809	4/47	467,7832,10370,27063	ATF3,BTG2,CITED2,ANKRD1
3_Summary	GO Biological Processes	GO:0035239	tube morphogenesis	-10.6822	-6.81872	24/661	182,652,800,2247,2303,4223,4856,4915,6091,6722,7042,8549,10052,10370,10395,10411,10653,57619,57669,90627,154796,161198,219699,255324,3976,27077,72,3815,1947,84159,223117	JAG1,BMP4,CALD1,FGF2,FOXC2,MEOX2,CCN3,NTRK2,ROBO1,SRF,TGFB2,LGR5,GJC1,CITED2,DLC1,RAPGEF3,SPINT2,SHROOM3,EPB41L5,STARD13,AMOT,CLEC14A,UNC5B,EPGN,LIF,B9D1,ACTG2,KIT,EFNB1,ARID5B,SEMA3D
3_Member	GO Biological Processes	GO:0035239	tube morphogenesis	-10.6822	-6.81872	24/661	182,652,800,2247,2303,4223,4856,4915,6091,6722,7042,8549,10052,10370,10395,10411,10653,57619,57669,90627,154796,161198,219699,255324	JAG1,BMP4,CALD1,FGF2,FOXC2,MEOX2,CCN3,NTRK2,ROBO1,SRF,TGFB2,LGR5,GJC1,CITED2,DLC1,RAPGEF3,SPINT2,SHROOM3,EPB41L5,STARD13,AMOT,CLEC14A,UNC5B,EPGN
3_Member	GO Biological Processes	GO:0001944	vasculature development	-9.31192	-5.79724	20/526	182,652,800,2247,2303,3976,4223,4856,4915,6091,6722,7042,10052,10370,10411,27077,154796,161198,219699,255324	JAG1,BMP4,CALD1,FGF2,FOXC2,LIF,MEOX2,CCN3,NTRK2,ROBO1,SRF,TGFB2,GJC1,CITED2,RAPGEF3,B9D1,AMOT,CLEC14A,UNC5B,EPGN
3_Member	GO Biological Processes	GO:0048514	blood vessel morphogenesis	-9.26184	-5.79724	18/419	182,652,800,2247,2303,4223,4856,4915,6091,6722,7042,10052,10370,10411,154796,161198,219699,255324	JAG1,BMP4,CALD1,FGF2,FOXC2,MEOX2,CCN3,NTRK2,ROBO1,SRF,TGFB2,GJC1,CITED2,RAPGEF3,AMOT,CLEC14A,UNC5B,EPGN
3_Member	GO Biological Processes	GO:0090130	tissue migration	-8.96505	-5.61837	10/97	72,2247,3815,4856,6091,6722,57669,90627,154796,161198	ACTG2,FGF2,KIT,CCN3,ROBO1,SRF,EPB41L5,STARD13,AMOT,CLEC14A
3_Member	GO Biological Processes	GO:0001667	ameboidal-type cell migration	-8.36477	-5.16422	12/183	1947,2247,3815,4856,6091,6722,57669,84159,90627,154796,161198,223117	EFNB1,FGF2,KIT,CCN3,ROBO1,SRF,EPB41L5,ARID5B,STARD13,AMOT,CLEC14A,SEMA3D
3_Member	GO Biological Processes	GO:0001568	blood vessel development	-8.01873	-4.87616	18/503	182,652,800,2247,2303,4223,4856,4915,6091,6722,7042,10052,10370,10411,154796,161198,219699,255324	JAG1,BMP4,CALD1,FGF2,FOXC2,MEOX2,CCN3,NTRK2,ROBO1,SRF,TGFB2,GJC1,CITED2,RAPGEF3,AMOT,CLEC14A,UNC5B,EPGN
3_Member	GO Biological Processes	GO:0001525	angiogenesis	-7.39779	-4.41283	14/321	182,652,800,2247,2303,4223,4856,6091,6722,10411,154796,161198,219699,255324	JAG1,BMP4,CALD1,FGF2,FOXC2,MEOX2,CCN3,ROBO1,SRF,RAPGEF3,AMOT,CLEC14A,UNC5B,EPGN
3_Member	GO Biological Processes	GO:0010631	epithelial cell migration	-6.8496	-4.09398	8/88	2247,3815,4856,6091,6722,90627,154796,161198	FGF2,KIT,CCN3,ROBO1,SRF,STARD13,AMOT,CLEC14A
3_Member	GO Biological Processes	GO:0090132	epithelium migration	-6.73574	-4.01405	8/91	2247,3815,4856,6091,6722,90627,154796,161198	FGF2,KIT,CCN3,ROBO1,SRF,STARD13,AMOT,CLEC14A
3_Member	GO Biological Processes	GO:0043542	endothelial cell migration	-6.47704	-3.82932	7/67	2247,4856,6091,6722,90627,154796,161198	FGF2,CCN3,ROBO1,SRF,STARD13,AMOT,CLEC14A
3_Member	GO Biological Processes	GO:0043534	blood vessel endothelial cell migration	-5.7268	-3.21262	5/31	2247,6091,6722,154796,161198	FGF2,ROBO1,SRF,AMOT,CLEC14A
3_Member	GO Biological Processes	GO:0002042	cell migration involved in sprouting angiogenesis	-4.97384	-2.64418	4/21	2247,6091,6722,161198	FGF2,ROBO1,SRF,CLEC14A
3_Member	GO Biological Processes	GO:0002040	sprouting angiogenesis	-4.32342	-2.19158	5/59	652,2247,6091,6722,161198	BMP4,FGF2,ROBO1,SRF,CLEC14A
4_Summary	GO Biological Processes	GO:0048729	tissue morphogenesis	-10.5633	-6.81872	22/554	72,182,652,2247,2303,2304,6091,6722,7042,7134,8091,8549,10370,10395,10468,10653,27063,51301,57619,57669,84962,90627,2149,2615,3976,4856,5915,6772,7157,7832,8654,9537,10019,23371,55679,64115,130399,3679,3899,27077,60529,154796,3955,4223,9915,10365,2250,2591,2674,4915,6272,23090,26999	ACTG2,JAG1,BMP4,FGF2,FOXC2,FOXE1,ROBO1,SRF,TGFB2,TNNC1,HMGA2,LGR5,CITED2,DLC1,FST,SPINT2,ANKRD1,GCNT4,SHROOM3,EPB41L5,AJUBA,STARD13,F2R,LRRC32,LIF,CCN3,RARB,STAT1,TP53,BTG2,PDE5A,TP53I11,SH2B3,TNS2,LIMS2,VSIR,ACVR1C,ITGA7,AFF3,B9D1,ALX4,AMOT,LFNG,MEOX2,ARNT2,KLF2,FGF5,GALNT3,GFRA1,NTRK2,SORT1,ZNF423,CYFIP2
4_Member	GO Biological Processes	GO:0048729	tissue morphogenesis	-10.5633	-6.81872	22/554	72,182,652,2247,2303,2304,6091,6722,7042,7134,8091,8549,10370,10395,10468,10653,27063,51301,57619,57669,84962,90627	ACTG2,JAG1,BMP4,FGF2,FOXC2,FOXE1,ROBO1,SRF,TGFB2,TNNC1,HMGA2,LGR5,CITED2,DLC1,FST,SPINT2,ANKRD1,GCNT4,SHROOM3,EPB41L5,AJUBA,STARD13
4_Member	GO Biological Processes	GO:0008285	negative regulation of cell population proliferation	-8.46535	-5.19785	23/784	652,2149,2247,2615,3976,4856,5915,6091,6722,6772,7042,7157,7832,8654,9537,10019,10370,10395,10653,23371,55679,64115,130399	BMP4,F2R,FGF2,LRRC32,LIF,CCN3,RARB,ROBO1,SRF,STAT1,TGFB2,TP53,BTG2,PDE5A,TP53I11,SH2B3,CITED2,DLC1,SPINT2,TNS2,LIMS2,VSIR,ACVR1C
4_Member	GO Biological Processes	GO:0048598	embryonic morphogenesis	-7.86873	-4.75249	19/576	652,2247,2303,2304,3679,3899,5915,6722,7042,7157,8091,10370,10395,10653,27077,57619,57669,60529,154796	BMP4,FGF2,FOXC2,FOXE1,ITGA7,AFF3,RARB,SRF,TGFB2,TP53,HMGA2,CITED2,DLC1,SPINT2,B9D1,SHROOM3,EPB41L5,ALX4,AMOT
4_Member	GO Biological Processes	GO:0009792	embryo development ending in birth or egg hatching	-7.75568	-4.68775	20/650	652,2247,2303,3955,3976,4223,6722,7042,7157,9915,10365,10370,10395,10653,27077,57619,57669,60529,130399,154796	BMP4,FGF2,FOXC2,LFNG,LIF,MEOX2,SRF,TGFB2,TP53,ARNT2,KLF2,CITED2,DLC1,SPINT2,B9D1,SHROOM3,EPB41L5,ALX4,ACVR1C,AMOT
4_Member	GO Biological Processes	GO:0043009	chordate embryonic development	-7.26533	-4.34359	19/629	652,2303,3955,3976,4223,6722,7042,7157,9915,10365,10370,10395,10653,27077,57619,57669,60529,130399,154796	BMP4,FOXC2,LFNG,LIF,MEOX2,SRF,TGFB2,TP53,ARNT2,KLF2,CITED2,DLC1,SPINT2,B9D1,SHROOM3,EPB41L5,ALX4,ACVR1C,AMOT
4_Member	GO Biological Processes	GO:0002009	morphogenesis of an epithelium	-7.23767	-4.33814	16/443	182,652,2247,2303,2304,6722,7042,8549,10370,10395,10468,10653,57619,57669,84962,90627	JAG1,BMP4,FGF2,FOXC2,FOXE1,SRF,TGFB2,LGR5,CITED2,DLC1,FST,SPINT2,SHROOM3,EPB41L5,AJUBA,STARD13
4_Member	GO Biological Processes	GO:0071363	cellular response to growth factor stimulus	-6.9636	-4.16098	16/464	652,2247,2250,2591,2615,2674,4915,6272,7042,7157,10370,10468,10653,27063,57669,130399	BMP4,FGF2,FGF5,GALNT3,LRRC32,GFRA1,NTRK2,SORT1,TGFB2,TP53,CITED2,FST,SPINT2,ANKRD1,EPB41L5,ACVR1C
4_Member	GO Biological Processes	GO:0070848	response to growth factor	-6.60906	-3.94362	16/493	652,2247,2250,2591,2615,2674,4915,6272,7042,7157,10370,10468,10653,27063,57669,130399	BMP4,FGF2,FGF5,GALNT3,LRRC32,GFRA1,NTRK2,SORT1,TGFB2,TP53,CITED2,FST,SPINT2,ANKRD1,EPB41L5,ACVR1C
4_Member	GO Biological Processes	GO:0060562	epithelial tube morphogenesis	-5.10974	-2.70754	11/307	652,2247,2303,6722,7042,8549,10370,10395,10653,57619,90627	BMP4,FGF2,FOXC2,SRF,TGFB2,LGR5,CITED2,DLC1,SPINT2,SHROOM3,STARD13
4_Member	GO Biological Processes	GO:0001843	neural tube closure	-4.51725	-2.31979	6/89	652,7042,10370,10395,10653,57619	BMP4,TGFB2,CITED2,DLC1,SPINT2,SHROOM3
4_Member	GO Biological Processes	GO:0060606	tube closure	-4.48969	-2.30137	6/90	652,7042,10370,10395,10653,57619	BMP4,TGFB2,CITED2,DLC1,SPINT2,SHROOM3
4_Member	GO Biological Processes	GO:0014020	primary neural tube formation	-4.35685	-2.21429	6/95	652,7042,10370,10395,10653,57619	BMP4,TGFB2,CITED2,DLC1,SPINT2,SHROOM3
4_Member	GO Biological Processes	GO:0016331	morphogenesis of embryonic epithelium	-4.282	-2.16577	7/143	652,7042,10370,10395,10653,57619,57669	BMP4,TGFB2,CITED2,DLC1,SPINT2,SHROOM3,EPB41L5
4_Member	GO Biological Processes	GO:0001701	in utero embryonic development	-4.24846	-2.14232	11/381	3976,6722,7157,9915,10365,10370,10653,27077,57669,130399,154796	LIF,SRF,TP53,ARNT2,KLF2,CITED2,SPINT2,B9D1,EPB41L5,ACVR1C,AMOT
4_Member	GO Biological Processes	GO:0001841	neural tube formation	-4.15985	-2.08033	6/103	652,7042,10370,10395,10653,57619	BMP4,TGFB2,CITED2,DLC1,SPINT2,SHROOM3
4_Member	GO Biological Processes	GO:0001838	embryonic epithelial tube formation	-3.75408	-1.78215	6/122	652,7042,10370,10395,10653,57619	BMP4,TGFB2,CITED2,DLC1,SPINT2,SHROOM3
4_Member	GO Biological Processes	GO:0072175	epithelial tube formation	-3.60435	-1.68255	6/130	652,7042,10370,10395,10653,57619	BMP4,TGFB2,CITED2,DLC1,SPINT2,SHROOM3
4_Member	GO Biological Processes	GO:0035148	tube formation	-3.33451	-1.50502	6/146	652,7042,10370,10395,10653,57619	BMP4,TGFB2,CITED2,DLC1,SPINT2,SHROOM3
4_Member	GO Biological Processes	GO:0071560	cellular response to transforming growth factor beta stimulus	-3.27242	-1.46481	6/150	2615,7042,7157,10370,27063,57669	LRRC32,TGFB2,TP53,CITED2,ANKRD1,EPB41L5
4_Member	GO Biological Processes	GO:0021915	neural tube development	-3.2572	-1.45458	6/151	652,7042,10370,10395,10653,57619	BMP4,TGFB2,CITED2,DLC1,SPINT2,SHROOM3
4_Member	GO Biological Processes	GO:0071559	response to transforming growth factor beta	-3.16829	-1.39674	6/157	2615,7042,7157,10370,27063,57669	LRRC32,TGFB2,TP53,CITED2,ANKRD1,EPB41L5
4_Member	GO Biological Processes	GO:0090287	regulation of cellular response to growth factor stimulus	-2.88326	-1.182	8/314	652,2247,6091,7157,10370,10468,23090,26999	BMP4,FGF2,ROBO1,TP53,CITED2,FST,ZNF423,CYFIP2
4_Member	GO Biological Processes	GO:0007179	transforming growth factor beta receptor signaling pathway	-2.43158	-0.857216	4/94	2615,7042,7157,10370	LRRC32,TGFB2,TP53,CITED2
5_Summary	GO Biological Processes	GO:0030155	regulation of cell adhesion	-9.45102	-5.8033	24/760	182,652,1947,2303,2319,2615,3485,3575,3728,3976,4739,5328,6722,7042,8654,10019,10125,10370,10395,10653,55679,57669,64115,64332,558,9760,6772	JAG1,BMP4,EFNB1,FOXC2,FLOT2,LRRC32,IGFBP2,IL7R,JUP,LIF,NEDD9,PLAU,SRF,TGFB2,PDE5A,SH2B3,RASGRP1,CITED2,DLC1,SPINT2,LIMS2,EPB41L5,VSIR,NFKBIZ,AXL,TOX,STAT1
5_Member	GO Biological Processes	GO:0030155	regulation of cell adhesion	-9.45102	-5.8033	24/760	182,652,1947,2303,2319,2615,3485,3575,3728,3976,4739,5328,6722,7042,8654,10019,10125,10370,10395,10653,55679,57669,64115,64332	JAG1,BMP4,EFNB1,FOXC2,FLOT2,LRRC32,IGFBP2,IL7R,JUP,LIF,NEDD9,PLAU,SRF,TGFB2,PDE5A,SH2B3,RASGRP1,CITED2,DLC1,SPINT2,LIMS2,EPB41L5,VSIR,NFKBIZ
5_Member	GO Biological Processes	GO:0045785	positive regulation of cell adhesion	-6.42314	-3.78402	15/446	1947,2303,2319,3485,3575,3728,3976,4739,7042,10125,10370,55679,57669,64115,64332	EFNB1,FOXC2,FLOT2,IGFBP2,IL7R,JUP,LIF,NEDD9,TGFB2,RASGRP1,CITED2,LIMS2,EPB41L5,VSIR,NFKBIZ
5_Member	GO Biological Processes	GO:0022407	regulation of cell-cell adhesion	-6.30173	-3.68744	15/456	182,652,1947,2319,2615,3485,3575,8654,10019,10125,10370,10653,57669,64115,64332	JAG1,BMP4,EFNB1,FLOT2,LRRC32,IGFBP2,IL7R,PDE5A,SH2B3,RASGRP1,CITED2,SPINT2,EPB41L5,VSIR,NFKBIZ
5_Member	GO Biological Processes	GO:0032825	positive regulation of natural killer cell differentiation	-4.79344	-2.50365	3/8	558,9760,10125	AXL,TOX,RASGRP1
5_Member	GO Biological Processes	GO:0050863	regulation of T cell activation	-4.67376	-2.43766	11/342	652,1947,2319,2615,3485,3575,8654,9760,10125,64115,64332	BMP4,EFNB1,FLOT2,LRRC32,IGFBP2,IL7R,PDE5A,TOX,RASGRP1,VSIR,NFKBIZ
5_Member	GO Biological Processes	GO:0033081	regulation of T cell differentiation in thymus	-4.65791	-2.42517	4/25	652,3575,9760,10125	BMP4,IL7R,TOX,RASGRP1
5_Member	GO Biological Processes	GO:0032823	regulation of natural killer cell differentiation	-4.20779	-2.11396	3/12	558,9760,10125	AXL,TOX,RASGRP1
5_Member	GO Biological Processes	GO:0045621	positive regulation of lymphocyte differentiation	-4.06772	-2.01988	6/107	558,3575,9760,10125,64115,64332	AXL,IL7R,TOX,RASGRP1,VSIR,NFKBIZ
5_Member	GO Biological Processes	GO:1902107	positive regulation of leukocyte differentiation	-4.02631	-1.99322	7/157	558,3575,3976,9760,10125,64115,64332	AXL,IL7R,LIF,TOX,RASGRP1,VSIR,NFKBIZ
5_Member	GO Biological Processes	GO:1903708	positive regulation of hemopoiesis	-4.02631	-1.99322	7/157	558,3575,3976,9760,10125,64115,64332	AXL,IL7R,LIF,TOX,RASGRP1,VSIR,NFKBIZ
5_Member	GO Biological Processes	GO:1903037	regulation of leukocyte cell-cell adhesion	-3.93476	-1.91442	10/344	652,1947,2319,2615,3485,3575,8654,10125,64115,64332	BMP4,EFNB1,FLOT2,LRRC32,IGFBP2,IL7R,PDE5A,RASGRP1,VSIR,NFKBIZ
5_Member	GO Biological Processes	GO:1903706	regulation of hemopoiesis	-3.66973	-1.73466	10/371	182,558,652,3575,3976,6772,9760,10125,64115,64332	JAG1,AXL,BMP4,IL7R,LIF,STAT1,TOX,RASGRP1,VSIR,NFKBIZ
5_Member	GO Biological Processes	GO:0045619	regulation of lymphocyte differentiation	-3.64433	-1.71595	7/181	558,652,3575,9760,10125,64115,64332	AXL,BMP4,IL7R,TOX,RASGRP1,VSIR,NFKBIZ
5_Member	GO Biological Processes	GO:0051249	regulation of lymphocyte activation	-3.57717	-1.66024	12/532	558,652,1947,2319,2615,3485,3575,8654,9760,10125,64115,64332	AXL,BMP4,EFNB1,FLOT2,LRRC32,IGFBP2,IL7R,PDE5A,TOX,RASGRP1,VSIR,NFKBIZ
5_Member	GO Biological Processes	GO:0045580	regulation of T cell differentiation	-3.2572	-1.45458	6/151	652,3575,9760,10125,64115,64332	BMP4,IL7R,TOX,RASGRP1,VSIR,NFKBIZ
5_Member	GO Biological Processes	GO:0032816	positive regulation of natural killer cell activation	-3.21632	-1.42108	3/25	558,9760,10125	AXL,TOX,RASGRP1
5_Member	GO Biological Processes	GO:1902105	regulation of leukocyte differentiation	-3.17285	-1.39674	8/283	558,652,3575,3976,9760,10125,64115,64332	AXL,BMP4,IL7R,LIF,TOX,RASGRP1,VSIR,NFKBIZ
5_Member	GO Biological Processes	GO:0050865	regulation of cell activation	-3.14404	-1.38168	13/681	558,652,1947,2319,2615,3485,3575,8654,9760,10019,10125,64115,64332	AXL,BMP4,EFNB1,FLOT2,LRRC32,IGFBP2,IL7R,PDE5A,TOX,SH2B3,RASGRP1,VSIR,NFKBIZ
5_Member	GO Biological Processes	GO:0050870	positive regulation of T cell activation	-3.10214	-1.34875	7/223	1947,2319,3485,3575,10125,64115,64332	EFNB1,FLOT2,IGFBP2,IL7R,RASGRP1,VSIR,NFKBIZ
5_Member	GO Biological Processes	GO:0022409	positive regulation of cell-cell adhesion	-3.09439	-1.3432	8/291	1947,2319,3485,3575,10125,10370,64115,64332	EFNB1,FLOT2,IGFBP2,IL7R,RASGRP1,CITED2,VSIR,NFKBIZ
5_Member	GO Biological Processes	GO:0051251	positive regulation of lymphocyte activation	-3.03005	-1.28657	9/371	558,1947,2319,3485,3575,9760,10125,64115,64332	AXL,EFNB1,FLOT2,IGFBP2,IL7R,TOX,RASGRP1,VSIR,NFKBIZ
5_Member	GO Biological Processes	GO:0002694	regulation of leukocyte activation	-2.93927	-1.22154	12/629	558,652,1947,2319,2615,3485,3575,8654,9760,10125,64115,64332	AXL,BMP4,EFNB1,FLOT2,LRRC32,IGFBP2,IL7R,PDE5A,TOX,RASGRP1,VSIR,NFKBIZ
5_Member	GO Biological Processes	GO:1903039	positive regulation of leukocyte cell-cell adhesion	-2.8656	-1.16728	7/245	1947,2319,3485,3575,10125,64115,64332	EFNB1,FLOT2,IGFBP2,IL7R,RASGRP1,VSIR,NFKBIZ
5_Member	GO Biological Processes	GO:0032814	regulation of natural killer cell activation	-2.67963	-1.04051	3/38	558,9760,10125	AXL,TOX,RASGRP1
5_Member	GO Biological Processes	GO:0002696	positive regulation of leukocyte activation	-2.65404	-1.01578	9/421	558,1947,2319,3485,3575,9760,10125,64115,64332	AXL,EFNB1,FLOT2,IGFBP2,IL7R,TOX,RASGRP1,VSIR,NFKBIZ
5_Member	GO Biological Processes	GO:0050867	positive regulation of cell activation	-2.55281	-0.93884	9/436	558,1947,2319,3485,3575,9760,10125,64115,64332	AXL,EFNB1,FLOT2,IGFBP2,IL7R,TOX,RASGRP1,VSIR,NFKBIZ
5_Member	GO Biological Processes	GO:0045582	positive regulation of T cell differentiation	-2.43158	-0.857216	4/94	3575,10125,64115,64332	IL7R,RASGRP1,VSIR,NFKBIZ
5_Member	GO Biological Processes	GO:0030101	natural killer cell activation	-2.07891	-0.593164	3/62	558,9760,10125	AXL,TOX,RASGRP1
6_Summary	KEGG Pathway	hsa05200	Pathways in cancer	-9.24084	-5.79724	20/531	182,330,652,2149,2247,2250,3575,3728,3815,5337,5915,6772,7042,7157,9915,10125,27436,54583,83439,196883,747,2303,4856,8091,8549,10370,10468,56956,130399	JAG1,BIRC3,BMP4,F2R,FGF2,FGF5,IL7R,JUP,KIT,PLD1,RARB,STAT1,TGFB2,TP53,ARNT2,RASGRP1,EML4,EGLN1,TCF7L1,ADCY4,DAGLA,FOXC2,CCN3,HMGA2,LGR5,CITED2,FST,LHX9,ACVR1C
6_Member	KEGG Pathway	hsa05200	Pathways in cancer	-9.24084	-5.79724	20/531	182,330,652,2149,2247,2250,3575,3728,3815,5337,5915,6772,7042,7157,9915,10125,27436,54583,83439,196883	JAG1,BIRC3,BMP4,F2R,FGF2,FGF5,IL7R,JUP,KIT,PLD1,RARB,STAT1,TGFB2,TP53,ARNT2,RASGRP1,EML4,EGLN1,TCF7L1,ADCY4
6_Member	GO Biological Processes	GO:0008283	cell population proliferation	-7.41839	-4.41413	17/489	652,747,2247,2303,3575,3815,4856,6772,7042,7157,8091,8549,10125,10370,10468,56956,130399	BMP4,DAGLA,FGF2,FOXC2,IL7R,KIT,CCN3,STAT1,TGFB2,TP53,HMGA2,LGR5,RASGRP1,CITED2,FST,LHX9,ACVR1C
7_Summary	GO Biological Processes	GO:0001934	positive regulation of protein phosphorylation	-9.14486	-5.75242	23/722	652,2247,2250,2674,3625,3815,3976,4217,4739,4915,6091,7042,7157,7164,8091,8654,8795,9052,10125,10411,29775,84962,255324,558,10019,374462,467,1850,2149,2319,5563,23476,130399	BMP4,FGF2,FGF5,GFRA1,INHBB,KIT,LIF,MAP3K5,NEDD9,NTRK2,ROBO1,TGFB2,TP53,TPD52L1,HMGA2,PDE5A,TNFRSF10B,GPRC5A,RASGRP1,RAPGEF3,CARD10,AJUBA,EPGN,AXL,SH2B3,PTPRQ,ATF3,DUSP8,F2R,FLOT2,PRKAA2,BRD4,ACVR1C
7_Member	GO Biological Processes	GO:0001934	positive regulation of protein phosphorylation	-9.14486	-5.75242	23/722	652,2247,2250,2674,3625,3815,3976,4217,4739,4915,6091,7042,7157,7164,8091,8654,8795,9052,10125,10411,29775,84962,255324	BMP4,FGF2,FGF5,GFRA1,INHBB,KIT,LIF,MAP3K5,NEDD9,NTRK2,ROBO1,TGFB2,TP53,TPD52L1,HMGA2,PDE5A,TNFRSF10B,GPRC5A,RASGRP1,RAPGEF3,CARD10,AJUBA,EPGN
7_Member	GO Biological Processes	GO:0033674	positive regulation of kinase activity	-7.62767	-4.58201	17/473	558,2247,3815,4217,4739,4915,6091,7042,7164,8091,8654,8795,9052,10125,29775,84962,255324	AXL,FGF2,KIT,MAP3K5,NEDD9,NTRK2,ROBO1,TGFB2,TPD52L1,HMGA2,PDE5A,TNFRSF10B,GPRC5A,RASGRP1,CARD10,AJUBA,EPGN
7_Member	GO Biological Processes	GO:0043405	regulation of MAP kinase activity	-7.32366	-4.37492	11/183	652,2247,3815,4217,6091,7164,8654,10019,10125,84962,255324	BMP4,FGF2,KIT,MAP3K5,ROBO1,TPD52L1,PDE5A,SH2B3,RASGRP1,AJUBA,EPGN
7_Member	GO Biological Processes	GO:0045860	positive regulation of protein kinase activity	-7.12712	-4.27179	15/393	2247,3815,4217,4739,6091,7042,7164,8091,8654,8795,9052,10125,29775,84962,255324	FGF2,KIT,MAP3K5,NEDD9,ROBO1,TGFB2,TPD52L1,HMGA2,PDE5A,TNFRSF10B,GPRC5A,RASGRP1,CARD10,AJUBA,EPGN
7_Member	GO Biological Processes	GO:0043406	positive regulation of MAP kinase activity	-7.03675	-4.22154	9/116	2247,3815,4217,6091,7164,8654,10125,84962,255324	FGF2,KIT,MAP3K5,ROBO1,TPD52L1,PDE5A,RASGRP1,AJUBA,EPGN
7_Member	GO Biological Processes	GO:0043549	regulation of kinase activity	-6.6299	-3.9526	20/763	558,652,2247,3815,4217,4739,4915,6091,7042,7164,8091,8654,8795,9052,10019,10125,29775,84962,255324,374462	AXL,BMP4,FGF2,KIT,MAP3K5,NEDD9,NTRK2,ROBO1,TGFB2,TPD52L1,HMGA2,PDE5A,TNFRSF10B,GPRC5A,SH2B3,RASGRP1,CARD10,AJUBA,EPGN,PTPRQ
7_Member	GO Biological Processes	GO:0051347	positive regulation of transferase activity	-6.59252	-3.93603	17/559	558,2247,3815,4217,4739,4915,6091,7042,7164,8091,8654,8795,9052,10125,29775,84962,255324	AXL,FGF2,KIT,MAP3K5,NEDD9,NTRK2,ROBO1,TGFB2,TPD52L1,HMGA2,PDE5A,TNFRSF10B,GPRC5A,RASGRP1,CARD10,AJUBA,EPGN
7_Member	GO Biological Processes	GO:0045859	regulation of protein kinase activity	-6.40467	-3.77399	18/645	652,2247,3815,4217,4739,6091,7042,7164,8091,8654,8795,9052,10019,10125,29775,84962,255324,374462	BMP4,FGF2,KIT,MAP3K5,NEDD9,ROBO1,TGFB2,TPD52L1,HMGA2,PDE5A,TNFRSF10B,GPRC5A,SH2B3,RASGRP1,CARD10,AJUBA,EPGN,PTPRQ
7_Member	GO Biological Processes	GO:0071902	positive regulation of protein serine/threonine kinase activity	-5.81772	-3.27721	10/208	2247,3815,4217,6091,7164,8091,8654,10125,84962,255324	FGF2,KIT,MAP3K5,ROBO1,TPD52L1,HMGA2,PDE5A,RASGRP1,AJUBA,EPGN
7_Member	GO Biological Processes	GO:0043408	regulation of MAPK cascade	-5.38297	-2.93391	17/686	467,652,1850,2149,2247,3815,3976,4217,4915,6091,7042,7164,8654,10019,10125,84962,255324	ATF3,BMP4,DUSP8,F2R,FGF2,KIT,LIF,MAP3K5,NTRK2,ROBO1,TGFB2,TPD52L1,PDE5A,SH2B3,RASGRP1,AJUBA,EPGN
7_Member	GO Biological Processes	GO:0043410	positive regulation of MAPK cascade	-5.21046	-2.79827	14/490	652,2149,2247,3815,3976,4217,4915,6091,7042,7164,8654,10125,84962,255324	BMP4,F2R,FGF2,KIT,LIF,MAP3K5,NTRK2,ROBO1,TGFB2,TPD52L1,PDE5A,RASGRP1,AJUBA,EPGN
7_Member	GO Biological Processes	GO:0071900	regulation of protein serine/threonine kinase activity	-5.06253	-2.67488	12/372	652,2247,3815,4217,6091,7164,8091,8654,10019,10125,84962,255324	BMP4,FGF2,KIT,MAP3K5,ROBO1,TPD52L1,HMGA2,PDE5A,SH2B3,RASGRP1,AJUBA,EPGN
7_Member	GO Biological Processes	GO:0032874	positive regulation of stress-activated MAPK cascade	-2.71762	-1.06378	5/131	652,4217,7042,7164,10125	BMP4,MAP3K5,TGFB2,TPD52L1,RASGRP1
7_Member	GO Biological Processes	GO:0070304	positive regulation of stress-activated protein kinase signaling cascade	-2.68886	-1.04288	5/133	652,4217,7042,7164,10125	BMP4,MAP3K5,TGFB2,TPD52L1,RASGRP1
7_Member	GO Biological Processes	GO:0045661	regulation of myoblast differentiation	-2.2452	-0.721034	3/54	652,2319,4217	BMP4,FLOT2,MAP3K5
7_Member	GO Biological Processes	GO:0006468	protein phosphorylation	-2.10953	-0.616546	11/700	558,652,3815,3976,4217,4915,5563,7042,8091,23476,130399	AXL,BMP4,KIT,LIF,MAP3K5,NTRK2,PRKAA2,TGFB2,HMGA2,BRD4,ACVR1C
8_Summary	GO Biological Processes	GO:0048863	stem cell differentiation	-8.90704	-5.60175	12/164	182,1947,2247,2303,3815,3976,6722,7042,7157,8091,10370,223117,72,652,6091,6772,57669,2273,3485,4739,4856,23327,51393	JAG1,EFNB1,FGF2,FOXC2,KIT,LIF,SRF,TGFB2,TP53,HMGA2,CITED2,SEMA3D,ACTG2,BMP4,ROBO1,STAT1,EPB41L5,FHL1,IGFBP2,NEDD9,CCN3,NEDD4L,TRPV2
8_Member	GO Biological Processes	GO:0048863	stem cell differentiation	-8.90704	-5.60175	12/164	182,1947,2247,2303,3815,3976,6722,7042,7157,8091,10370,223117	JAG1,EFNB1,FGF2,FOXC2,KIT,LIF,SRF,TGFB2,TP53,HMGA2,CITED2,SEMA3D
8_Member	GO Biological Processes	GO:0060485	mesenchyme development	-7.25892	-4.34359	12/230	72,182,652,1947,2303,6091,6772,7042,8091,10370,57669,223117	ACTG2,JAG1,BMP4,EFNB1,FOXC2,ROBO1,STAT1,TGFB2,HMGA2,CITED2,EPB41L5,SEMA3D
8_Member	GO Biological Processes	GO:0048762	mesenchymal cell differentiation	-6.66813	-3.9649	10/168	182,652,1947,2303,6772,7042,8091,10370,57669,223117	JAG1,BMP4,EFNB1,FOXC2,STAT1,TGFB2,HMGA2,CITED2,EPB41L5,SEMA3D
8_Member	GO Biological Processes	GO:0048864	stem cell development	-4.60205	-2.38891	6/86	182,1947,2247,2303,10370,223117	JAG1,EFNB1,FGF2,FOXC2,CITED2,SEMA3D
8_Member	GO Biological Processes	GO:0040008	regulation of growth	-4.37827	-2.22471	15/660	652,2247,2273,2303,3485,4739,4856,6722,7042,7157,8091,10370,23327,51393,223117	BMP4,FGF2,FHL1,FOXC2,IGFBP2,NEDD9,CCN3,SRF,TGFB2,TP53,HMGA2,CITED2,NEDD4L,TRPV2,SEMA3D
8_Member	GO Biological Processes	GO:0014032	neural crest cell development	-3.66596	-1.73425	5/81	182,1947,2303,10370,223117	JAG1,EFNB1,FOXC2,CITED2,SEMA3D
8_Member	GO Biological Processes	GO:0014031	mesenchymal cell development	-3.54437	-1.63752	5/86	182,1947,2303,10370,223117	JAG1,EFNB1,FOXC2,CITED2,SEMA3D
8_Member	GO Biological Processes	GO:0014033	neural crest cell differentiation	-3.38689	-1.53753	5/93	182,1947,2303,10370,223117	JAG1,EFNB1,FOXC2,CITED2,SEMA3D
8_Member	GO Biological Processes	GO:0048638	regulation of developmental growth	-2.75599	-1.09325	8/329	652,2247,2303,6722,10370,23327,51393,223117	BMP4,FGF2,FOXC2,SRF,CITED2,NEDD4L,TRPV2,SEMA3D
9_Summary	GO Biological Processes	GO:0098609	cell-cell adhesion	-8.41089	-5.17815	19/533	3679,3728,3815,4856,6091,6722,7042,9379,26999,55679,57463,57526,57575,57722,84623,84665,84962,114798,375033,558,4059,10395,57669,59277,2149,10052	ITGA7,JUP,KIT,CCN3,ROBO1,SRF,TGFB2,NRXN2,CYFIP2,LIMS2,AMIGO1,PCDH19,PCDH10,IGDCC4,KIRREL3,MYPN,AJUBA,SLITRK1,PEAR1,AXL,BCAM,DLC1,EPB41L5,NTN4,F2R,GJC1
9_Member	GO Biological Processes	GO:0098609	cell-cell adhesion	-8.41089	-5.17815	19/533	3679,3728,3815,4856,6091,6722,7042,9379,26999,55679,57463,57526,57575,57722,84623,84665,84962,114798,375033	ITGA7,JUP,KIT,CCN3,ROBO1,SRF,TGFB2,NRXN2,CYFIP2,LIMS2,AMIGO1,PCDH19,PCDH10,IGDCC4,KIRREL3,MYPN,AJUBA,SLITRK1,PEAR1
9_Member	GO Biological Processes	GO:0031589	cell-substrate adhesion	-4.38262	-2.22626	8/188	558,3679,4059,6722,10395,57669,59277,84962	AXL,ITGA7,BCAM,SRF,DLC1,EPB41L5,NTN4,AJUBA
9_Member	GO Biological Processes	GO:0034330	cell junction organization	-3.43323	-1.56365	11/473	2149,3728,6722,7042,9379,10052,10395,55679,84623,84962,114798	F2R,JUP,SRF,TGFB2,NRXN2,GJC1,DLC1,LIMS2,KIRREL3,AJUBA,SLITRK1
9_Member	GO Biological Processes	GO:0034329	cell junction assembly	-3.42595	-1.56071	8/259	3728,6722,9379,10052,10395,84623,84962,114798	JUP,SRF,NRXN2,GJC1,DLC1,KIRREL3,AJUBA,SLITRK1
9_Member	GO Biological Processes	GO:0007160	cell-matrix adhesion	-2.70318	-1.05459	5/132	3679,4059,6722,10395,84962	ITGA7,BCAM,SRF,DLC1,AJUBA
10_Summary	GO Biological Processes	GO:0000902	cell morphogenesis	-8.22746	-5.05686	21/673	558,1947,3575,6091,6383,6722,7042,10365,10653,23218,26999,56956,57463,57619,57669,59277,84623,84665,114798,219699,223117,652,2247,3815,4856,5328,5337,154796,57526,57575,84962,2674,7832,27063,7225,286,5664,7157	AXL,EFNB1,IL7R,ROBO1,SDC2,SRF,TGFB2,KLF2,SPINT2,NBEAL2,CYFIP2,LHX9,AMIGO1,SHROOM3,EPB41L5,NTN4,KIRREL3,MYPN,SLITRK1,UNC5B,SEMA3D,BMP4,FGF2,KIT,CCN3,PLAU,PLD1,AMOT,PCDH19,PCDH10,AJUBA,GFRA1,BTG2,ANKRD1,TRPC6,ANK1,PSEN2,TP53
10_Member	GO Biological Processes	GO:0000902	cell morphogenesis	-8.22746	-5.05686	21/673	558,1947,3575,6091,6383,6722,7042,10365,10653,23218,26999,56956,57463,57619,57669,59277,84623,84665,114798,219699,223117	AXL,EFNB1,IL7R,ROBO1,SDC2,SRF,TGFB2,KLF2,SPINT2,NBEAL2,CYFIP2,LHX9,AMIGO1,SHROOM3,EPB41L5,NTN4,KIRREL3,MYPN,SLITRK1,UNC5B,SEMA3D
10_Member	GO Biological Processes	GO:0000904	cell morphogenesis involved in differentiation	-5.57545	-3.08002	15/522	558,1947,6091,6383,6722,10653,23218,56956,57463,57669,59277,84665,114798,219699,223117	AXL,EFNB1,ROBO1,SDC2,SRF,SPINT2,NBEAL2,LHX9,AMIGO1,EPB41L5,NTN4,MYPN,SLITRK1,UNC5B,SEMA3D
10_Member	GO Biological Processes	GO:0006935	chemotaxis	-5.05298	-2.67478	14/506	652,1947,2247,3815,4856,5328,5337,6091,7042,56956,84665,154796,219699,223117	BMP4,EFNB1,FGF2,KIT,CCN3,PLAU,PLD1,ROBO1,TGFB2,LHX9,MYPN,AMOT,UNC5B,SEMA3D
10_Member	GO Biological Processes	GO:0042330	taxis	-5.0146	-2.65469	14/510	652,1947,2247,3815,4856,5328,5337,6091,7042,56956,84665,154796,219699,223117	BMP4,EFNB1,FGF2,KIT,CCN3,PLAU,PLD1,ROBO1,TGFB2,LHX9,MYPN,AMOT,UNC5B,SEMA3D
10_Member	GO Biological Processes	GO:0098742	cell-cell adhesion via plasma-membrane adhesion molecules	-4.20185	-2.11044	9/257	6091,7042,57463,57526,57575,84623,84665,84962,114798	ROBO1,TGFB2,AMIGO1,PCDH19,PCDH10,KIRREL3,MYPN,AJUBA,SLITRK1
10_Member	GO Biological Processes	GO:0031175	neuron projection development	-3.95385	-1.93145	14/639	1947,2674,6091,6383,6722,7832,26999,56956,57463,84623,84665,114798,219699,223117	EFNB1,GFRA1,ROBO1,SDC2,SRF,BTG2,CYFIP2,LHX9,AMIGO1,KIRREL3,MYPN,SLITRK1,UNC5B,SEMA3D
10_Member	GO Biological Processes	GO:0032989	cellular component morphogenesis	-3.85643	-1.85805	13/573	1947,6091,6383,6722,26999,27063,56956,57463,84623,84665,114798,219699,223117	EFNB1,ROBO1,SDC2,SRF,CYFIP2,ANKRD1,LHX9,AMIGO1,KIRREL3,MYPN,SLITRK1,UNC5B,SEMA3D
10_Member	GO Biological Processes	GO:0048812	neuron projection morphogenesis	-3.57556	-1.66024	11/455	1947,6091,6383,26999,56956,57463,84623,84665,114798,219699,223117	EFNB1,ROBO1,SDC2,CYFIP2,LHX9,AMIGO1,KIRREL3,MYPN,SLITRK1,UNC5B,SEMA3D
10_Member	GO Biological Processes	GO:0120039	plasma membrane bounded cell projection morphogenesis	-3.5433	-1.63752	11/459	1947,6091,6383,26999,56956,57463,84623,84665,114798,219699,223117	EFNB1,ROBO1,SDC2,CYFIP2,LHX9,AMIGO1,KIRREL3,MYPN,SLITRK1,UNC5B,SEMA3D
10_Member	GO Biological Processes	GO:0048858	cell projection morphogenesis	-3.5114	-1.61555	11/463	1947,6091,6383,26999,56956,57463,84623,84665,114798,219699,223117	EFNB1,ROBO1,SDC2,CYFIP2,LHX9,AMIGO1,KIRREL3,MYPN,SLITRK1,UNC5B,SEMA3D
10_Member	Reactome Gene Sets	R-HSA-373752	Netrin-1 signaling	-3.45442	-1.57171	4/50	6091,7225,59277,219699	ROBO1,TRPC6,NTN4,UNC5B
10_Member	GO Biological Processes	GO:0032990	cell part morphogenesis	-3.36474	-1.52321	11/482	1947,6091,6383,26999,56956,57463,84623,84665,114798,219699,223117	EFNB1,ROBO1,SDC2,CYFIP2,LHX9,AMIGO1,KIRREL3,MYPN,SLITRK1,UNC5B,SEMA3D
10_Member	GO Biological Processes	GO:0007156	homophilic cell adhesion via plasma membrane adhesion molecules	-3.0287	-1.28657	6/167	6091,57463,57526,57575,84623,84665	ROBO1,AMIGO1,PCDH19,PCDH10,KIRREL3,MYPN
10_Member	KEGG Pathway	hsa04360	Axon guidance	-2.83701	-1.15024	6/182	1947,6091,7225,59277,219699,223117	EFNB1,ROBO1,TRPC6,NTN4,UNC5B,SEMA3D
10_Member	GO Biological Processes	GO:0048667	cell morphogenesis involved in neuron differentiation	-2.7243	-1.0687	9/411	1947,6091,6383,56956,57463,84665,114798,219699,223117	EFNB1,ROBO1,SDC2,LHX9,AMIGO1,MYPN,SLITRK1,UNC5B,SEMA3D
10_Member	GO Biological Processes	GO:0007409	axonogenesis	-2.65166	-1.01424	8/342	1947,6091,56956,57463,84665,114798,219699,223117	EFNB1,ROBO1,LHX9,AMIGO1,MYPN,SLITRK1,UNC5B,SEMA3D
10_Member	Reactome Gene Sets	R-HSA-422475	Axon guidance	-2.3759	-0.813832	10/552	286,1947,2674,5664,6091,6383,7225,56956,59277,219699	ANK1,EFNB1,GFRA1,PSEN2,ROBO1,SDC2,TRPC6,LHX9,NTN4,UNC5B
10_Member	GO Biological Processes	GO:0061564	axon development	-2.37458	-0.813219	8/380	1947,6091,56956,57463,84665,114798,219699,223117	EFNB1,ROBO1,LHX9,AMIGO1,MYPN,SLITRK1,UNC5B,SEMA3D
10_Member	GO Biological Processes	GO:0008038	neuron recognition	-2.36375	-0.806642	3/49	6091,57463,84665	ROBO1,AMIGO1,MYPN
10_Member	GO Biological Processes	GO:0007411	axon guidance	-2.36085	-0.804448	6/227	1947,6091,56956,84665,219699,223117	EFNB1,ROBO1,LHX9,MYPN,UNC5B,SEMA3D
10_Member	GO Biological Processes	GO:0097485	neuron projection guidance	-2.35163	-0.797722	6/228	1947,6091,56956,84665,219699,223117	EFNB1,ROBO1,LHX9,MYPN,UNC5B,SEMA3D
10_Member	WikiPathways	WP4747	Netrin-UNC5B signaling pathway	-2.2911	-0.751263	3/52	7157,59277,219699	TP53,NTN4,UNC5B
10_Member	Reactome Gene Sets	R-HSA-9675108	Nervous system development	-2.24374	-0.720525	10/577	286,1947,2674,5664,6091,6383,7225,56956,59277,219699	ANK1,EFNB1,GFRA1,PSEN2,ROBO1,SDC2,TRPC6,LHX9,NTN4,UNC5B
11_Summary	GO Biological Processes	GO:0051271	negative regulation of cellular component movement	-7.48455	-4.46009	15/369	182,274,2247,3728,4223,4856,6091,6722,10370,10395,10653,11240,29775,90627,130399,223117,652,2303,7042,57669	JAG1,BIN1,FGF2,JUP,MEOX2,CCN3,ROBO1,SRF,CITED2,DLC1,SPINT2,PADI2,CARD10,STARD13,ACVR1C,SEMA3D,BMP4,FOXC2,TGFB2,EPB41L5
11_Member	GO Biological Processes	GO:0051271	negative regulation of cellular component movement	-7.48455	-4.46009	15/369	182,274,2247,3728,4223,4856,6091,6722,10370,10395,10653,11240,29775,90627,130399	JAG1,BIN1,FGF2,JUP,MEOX2,CCN3,ROBO1,SRF,CITED2,DLC1,SPINT2,PADI2,CARD10,STARD13,ACVR1C
11_Member	GO Biological Processes	GO:0040013	negative regulation of locomotion	-7.08428	-4.25611	15/396	182,2247,3728,4223,4856,6091,6722,10370,10395,10653,11240,29775,90627,130399,223117	JAG1,FGF2,JUP,MEOX2,CCN3,ROBO1,SRF,CITED2,DLC1,SPINT2,PADI2,CARD10,STARD13,ACVR1C,SEMA3D
11_Member	GO Biological Processes	GO:2000146	negative regulation of cell motility	-6.77103	-4.03713	14/361	182,2247,3728,4223,4856,6091,6722,10370,10395,10653,11240,29775,90627,130399	JAG1,FGF2,JUP,MEOX2,CCN3,ROBO1,SRF,CITED2,DLC1,SPINT2,PADI2,CARD10,STARD13,ACVR1C
11_Member	GO Biological Processes	GO:0030336	negative regulation of cell migration	-6.17078	-3.59387	13/346	182,2247,3728,4223,4856,6091,6722,10370,10395,11240,29775,90627,130399	JAG1,FGF2,JUP,MEOX2,CCN3,ROBO1,SRF,CITED2,DLC1,PADI2,CARD10,STARD13,ACVR1C
11_Member	GO Biological Processes	GO:0010632	regulation of epithelial cell migration	-3.80446	-1.82138	9/290	652,2247,2303,3728,4223,7042,29775,57669,90627	BMP4,FGF2,FOXC2,JUP,MEOX2,TGFB2,CARD10,EPB41L5,STARD13
11_Member	GO Biological Processes	GO:0043537	negative regulation of blood vessel endothelial cell migration	-3.74302	-1.77836	5/78	2247,3728,4223,29775,90627	FGF2,JUP,MEOX2,CARD10,STARD13
11_Member	GO Biological Processes	GO:0090049	regulation of cell migration involved in sprouting angiogenesis	-3.74302	-1.77836	5/78	2247,2303,4223,29775,90627	FGF2,FOXC2,MEOX2,CARD10,STARD13
11_Member	GO Biological Processes	GO:0010596	negative regulation of endothelial cell migration	-3.30281	-1.48117	5/97	2247,3728,4223,29775,90627	FGF2,JUP,MEOX2,CARD10,STARD13
11_Member	GO Biological Processes	GO:0043535	regulation of blood vessel endothelial cell migration	-3.27242	-1.46481	6/150	2247,2303,3728,4223,29775,90627	FGF2,FOXC2,JUP,MEOX2,CARD10,STARD13
11_Member	GO Biological Processes	GO:0010594	regulation of endothelial cell migration	-3.02386	-1.28657	7/230	652,2247,2303,3728,4223,29775,90627	BMP4,FGF2,FOXC2,JUP,MEOX2,CARD10,STARD13
11_Member	GO Biological Processes	GO:0010633	negative regulation of epithelial cell migration	-3.01942	-1.28657	5/112	2247,3728,4223,29775,90627	FGF2,JUP,MEOX2,CARD10,STARD13
11_Member	GO Biological Processes	GO:0090051	negative regulation of cell migration involved in sprouting angiogenesis	-2.55433	-0.93884	3/42	4223,29775,90627	MEOX2,CARD10,STARD13
12_Summary	GO Biological Processes	GO:0001501	skeletal system development	-7.34206	-4.37558	17/495	652,2247,2303,3815,4856,5915,6399,6722,7042,7157,8091,10019,10370,10468,23508,60529,84159,2304,3976,10653,57669,3899,27077,4223	BMP4,FGF2,FOXC2,KIT,CCN3,RARB,TRAPPC2,SRF,TGFB2,TP53,HMGA2,SH2B3,CITED2,FST,TTC9,ALX4,ARID5B,FOXE1,LIF,SPINT2,EPB41L5,AFF3,B9D1,MEOX2
12_Member	GO Biological Processes	GO:0001501	skeletal system development	-7.34206	-4.37558	17/495	652,2247,2303,3815,4856,5915,6399,6722,7042,7157,8091,10019,10370,10468,23508,60529,84159	BMP4,FGF2,FOXC2,KIT,CCN3,RARB,TRAPPC2,SRF,TGFB2,TP53,HMGA2,SH2B3,CITED2,FST,TTC9,ALX4,ARID5B
12_Member	GO Biological Processes	GO:0048568	embryonic organ development	-4.9677	-2.64221	13/446	652,2303,2304,3815,3976,5915,6722,7042,7157,10019,10370,10653,60529	BMP4,FOXC2,FOXE1,KIT,LIF,RARB,SRF,TGFB2,TP53,SH2B3,CITED2,SPINT2,ALX4
12_Member	GO Biological Processes	GO:0048565	digestive tract development	-4.61201	-2.39565	7/127	652,2304,3815,5915,7042,57669,60529	BMP4,FOXE1,KIT,RARB,TGFB2,EPB41L5,ALX4
12_Member	GO Biological Processes	GO:0035116	embryonic hindlimb morphogenesis	-4.4556	-2.2821	4/28	652,3899,5915,60529	BMP4,AFF3,RARB,ALX4
12_Member	GO Biological Processes	GO:0055123	digestive system development	-4.36039	-2.21429	7/139	652,2304,3815,5915,7042,57669,60529	BMP4,FOXE1,KIT,RARB,TGFB2,EPB41L5,ALX4
12_Member	GO Biological Processes	GO:0035137	hindlimb morphogenesis	-4.06372	-2.01807	4/35	652,3899,5915,60529	BMP4,AFF3,RARB,ALX4
12_Member	GO Biological Processes	GO:0030326	embryonic limb morphogenesis	-3.81316	-1.82564	6/119	652,3899,5915,7042,27077,60529	BMP4,AFF3,RARB,TGFB2,B9D1,ALX4
12_Member	GO Biological Processes	GO:0035113	embryonic appendage morphogenesis	-3.81316	-1.82564	6/119	652,3899,5915,7042,27077,60529	BMP4,AFF3,RARB,TGFB2,B9D1,ALX4
12_Member	GO Biological Processes	GO:0048736	appendage development	-3.70371	-1.76186	7/177	652,3899,4223,5915,7042,27077,60529	BMP4,AFF3,MEOX2,RARB,TGFB2,B9D1,ALX4
12_Member	GO Biological Processes	GO:0060173	limb development	-3.70371	-1.76186	7/177	652,3899,4223,5915,7042,27077,60529	BMP4,AFF3,MEOX2,RARB,TGFB2,B9D1,ALX4
12_Member	GO Biological Processes	GO:0035107	appendage morphogenesis	-3.39863	-1.54331	6/142	652,3899,5915,7042,27077,60529	BMP4,AFF3,RARB,TGFB2,B9D1,ALX4
12_Member	GO Biological Processes	GO:0035108	limb morphogenesis	-3.39863	-1.54331	6/142	652,3899,5915,7042,27077,60529	BMP4,AFF3,RARB,TGFB2,B9D1,ALX4
12_Member	GO Biological Processes	GO:0048562	embryonic organ morphogenesis	-2.43935	-0.859822	7/292	652,2303,2304,5915,6722,10370,60529	BMP4,FOXC2,FOXE1,RARB,SRF,CITED2,ALX4
12_Member	GO Biological Processes	GO:0048705	skeletal system morphogenesis	-2.37943	-0.816417	6/225	652,2303,5915,10370,60529,84159	BMP4,FOXC2,RARB,CITED2,ALX4,ARID5B
12_Member	GO Biological Processes	GO:0042733	embryonic digit morphogenesis	-2.15884	-0.656637	3/58	652,27077,60529	BMP4,B9D1,ALX4
13_Summary	WikiPathways	WP5087	Malignant pleural mesothelioma	-7.18426	-4.29998	16/447	72,467,2247,2250,3815,4217,4915,5328,5563,6772,7157,8994,11098,83439,84962,154796,3679,94274	ACTG2,ATF3,FGF2,FGF5,KIT,MAP3K5,NTRK2,PLAU,PRKAA2,STAT1,TP53,LIMD1,PRSS23,TCF7L1,AJUBA,AMOT,ITGA7,PPP1R14A
13_Member	WikiPathways	WP5087	Malignant pleural mesothelioma	-7.18426	-4.29998	16/447	72,467,2247,2250,3815,4217,4915,5328,5563,6772,7157,8994,11098,83439,84962,154796	ACTG2,ATF3,FGF2,FGF5,KIT,MAP3K5,NTRK2,PLAU,PRKAA2,STAT1,TP53,LIMD1,PRSS23,TCF7L1,AJUBA,AMOT
13_Member	WikiPathways	WP4541	Hippo-Merlin signaling dysregulation	-3.73476	-1.77368	6/123	3679,3815,4915,84962,94274,154796	ITGA7,KIT,NTRK2,AJUBA,PPP1R14A,AMOT
13_Member	WikiPathways	WP4540	Hippo signaling regulation pathways	-2.35132	-0.797722	4/99	3815,4915,5563,83439	KIT,NTRK2,PRKAA2,TCF7L1
14_Summary	GO Biological Processes	GO:0010720	positive regulation of cell development	-6.92561	-4.14713	13/297	274,652,3815,3976,4739,4915,6091,6722,8654,51393,55679,57463,114798,7157,223117,5205,5337,6383,9760,10602,23327,10411,57669,84962	BIN1,BMP4,KIT,LIF,NEDD9,NTRK2,ROBO1,SRF,PDE5A,TRPV2,LIMS2,AMIGO1,SLITRK1,TP53,SEMA3D,ATP8B1,PLD1,SDC2,TOX,CDC42EP3,NEDD4L,RAPGEF3,EPB41L5,AJUBA
14_Member	GO Biological Processes	GO:0010720	positive regulation of cell development	-6.92561	-4.14713	13/297	274,652,3815,3976,4739,4915,6091,6722,8654,51393,55679,57463,114798	BIN1,BMP4,KIT,LIF,NEDD9,NTRK2,ROBO1,SRF,PDE5A,TRPV2,LIMS2,AMIGO1,SLITRK1
14_Member	GO Biological Processes	GO:0060284	regulation of cell development	-5.80414	-3.27037	15/500	274,652,3815,3976,4739,4915,6091,6722,7157,8654,51393,55679,57463,114798,223117	BIN1,BMP4,KIT,LIF,NEDD9,NTRK2,ROBO1,SRF,TP53,PDE5A,TRPV2,LIMS2,AMIGO1,SLITRK1,SEMA3D
14_Member	GO Biological Processes	GO:0050772	positive regulation of axonogenesis	-4.87773	-2.56847	6/77	4915,6091,6722,51393,57463,114798	NTRK2,ROBO1,SRF,TRPV2,AMIGO1,SLITRK1
14_Member	GO Biological Processes	GO:0050769	positive regulation of neurogenesis	-4.69695	-2.45063	9/222	274,3815,3976,4915,6091,6722,51393,57463,114798	BIN1,KIT,LIF,NTRK2,ROBO1,SRF,TRPV2,AMIGO1,SLITRK1
14_Member	GO Biological Processes	GO:0050767	regulation of neurogenesis	-4.45941	-2.28299	11/361	274,3815,3976,4915,6091,6722,7157,51393,57463,114798,223117	BIN1,KIT,LIF,NTRK2,ROBO1,SRF,TP53,TRPV2,AMIGO1,SLITRK1,SEMA3D
14_Member	GO Biological Processes	GO:0050770	regulation of axonogenesis	-4.07882	-2.02028	7/154	4915,6091,6722,51393,57463,114798,223117	NTRK2,ROBO1,SRF,TRPV2,AMIGO1,SLITRK1,SEMA3D
14_Member	GO Biological Processes	GO:0120035	regulation of plasma membrane bounded cell projection organization	-4.07656	-2.02028	14/622	3815,4915,5205,5337,6091,6383,6722,9760,10602,23327,51393,57463,114798,223117	KIT,NTRK2,ATP8B1,PLD1,ROBO1,SDC2,SRF,TOX,CDC42EP3,NEDD4L,TRPV2,AMIGO1,SLITRK1,SEMA3D
14_Member	GO Biological Processes	GO:0051962	positive regulation of nervous system development	-4.05049	-2.00915	9/269	274,3815,3976,4915,6091,6722,51393,57463,114798	BIN1,KIT,LIF,NTRK2,ROBO1,SRF,TRPV2,AMIGO1,SLITRK1
14_Member	GO Biological Processes	GO:0031344	regulation of cell projection organization	-3.95385	-1.93145	14/639	3815,4915,5205,5337,6091,6383,6722,9760,10602,23327,51393,57463,114798,223117	KIT,NTRK2,ATP8B1,PLD1,ROBO1,SDC2,SRF,TOX,CDC42EP3,NEDD4L,TRPV2,AMIGO1,SLITRK1,SEMA3D
14_Member	GO Biological Processes	GO:0051960	regulation of nervous system development	-3.70846	-1.76318	11/439	274,3815,3976,4915,6091,6722,7157,51393,57463,114798,223117	BIN1,KIT,LIF,NTRK2,ROBO1,SRF,TP53,TRPV2,AMIGO1,SLITRK1,SEMA3D
14_Member	GO Biological Processes	GO:0031346	positive regulation of cell projection organization	-3.28929	-1.47663	9/341	3815,4915,6091,6722,9760,10602,51393,57463,114798	KIT,NTRK2,ROBO1,SRF,TOX,CDC42EP3,TRPV2,AMIGO1,SLITRK1
14_Member	GO Biological Processes	GO:0044089	positive regulation of cellular component biogenesis	-3.28333	-1.47193	11/493	274,3815,4915,6722,7157,10411,10602,57463,57669,84962,114798	BIN1,KIT,NTRK2,SRF,TP53,RAPGEF3,CDC42EP3,AMIGO1,EPB41L5,AJUBA,SLITRK1
14_Member	GO Biological Processes	GO:0010975	regulation of neuron projection development	-3.1606	-1.3937	10/431	4915,6091,6383,6722,9760,23327,51393,57463,114798,223117	NTRK2,ROBO1,SDC2,SRF,TOX,NEDD4L,TRPV2,AMIGO1,SLITRK1,SEMA3D
14_Member	GO Biological Processes	GO:1901890	positive regulation of cell junction assembly	-2.27562	-0.740506	4/104	4915,57463,57669,114798	NTRK2,AMIGO1,EPB41L5,SLITRK1
14_Member	GO Biological Processes	GO:0051965	positive regulation of synapse assembly	-2.07891	-0.593164	3/62	4915,57463,114798	NTRK2,AMIGO1,SLITRK1
15_Summary	GO Biological Processes	GO:0072001	renal system development	-6.92561	-4.14713	13/297	182,652,2247,2303,2674,5915,6772,7042,8549,23371,51301,84159,84623,6722,8091,9760,57669,83439,10411,10653,54507,57619,3976,10468,23090,4856,7357,10365,27077,3815,90627,10370,59277,2304,2250,1879,3625,146691,130399,4217,7157	JAG1,BMP4,FGF2,FOXC2,GFRA1,RARB,STAT1,TGFB2,LGR5,TNS2,GCNT4,ARID5B,KIRREL3,SRF,HMGA2,TOX,EPB41L5,TCF7L1,RAPGEF3,SPINT2,ADAMTSL4,SHROOM3,LIF,FST,ZNF423,CCN3,UGCG,KLF2,B9D1,KIT,STARD13,CITED2,NTN4,FOXE1,FGF5,EBF1,INHBB,TOM1L2,ACVR1C,MAP3K5,TP53
15_Member	GO Biological Processes	GO:0072001	renal system development	-6.92561	-4.14713	13/297	182,652,2247,2303,2674,5915,6772,7042,8549,23371,51301,84159,84623	JAG1,BMP4,FGF2,FOXC2,GFRA1,RARB,STAT1,TGFB2,LGR5,TNS2,GCNT4,ARID5B,KIRREL3
15_Member	GO Biological Processes	GO:0001655	urogenital system development	-6.34333	-3.72092	13/334	182,652,2247,2303,2674,5915,6772,7042,8549,23371,51301,84159,84623	JAG1,BMP4,FGF2,FOXC2,GFRA1,RARB,STAT1,TGFB2,LGR5,TNS2,GCNT4,ARID5B,KIRREL3
15_Member	GO Biological Processes	GO:0001822	kidney development	-6.20749	-3.6124	12/288	182,652,2247,2303,2674,5915,6772,7042,23371,51301,84159,84623	JAG1,BMP4,FGF2,FOXC2,GFRA1,RARB,STAT1,TGFB2,TNS2,GCNT4,ARID5B,KIRREL3
15_Member	WikiPathways	WP2857	Mesodermal commitment pathway	-5.94243	-3.39509	9/156	652,2303,5915,6722,8091,9760,57669,83439,84159	BMP4,FOXC2,RARB,SRF,HMGA2,TOX,EPB41L5,TCF7L1,ARID5B
15_Member	GO Biological Processes	GO:0002064	epithelial cell development	-5.04068	-2.66713	9/201	182,652,2303,5915,10411,10653,54507,57619,57669	JAG1,BMP4,FOXC2,RARB,RAPGEF3,SPINT2,ADAMTSL4,SHROOM3,EPB41L5
15_Member	WikiPathways	WP560	TGF-beta receptor signaling	-4.35953	-2.21429	5/58	652,3976,6772,10468,23090	BMP4,LIF,STAT1,FST,ZNF423
15_Member	WikiPathways	WP4816	TGF-beta receptor signaling in skeletal dysplasias	-4.21902	-2.12031	5/62	652,3976,6772,10468,23090	BMP4,LIF,STAT1,FST,ZNF423
15_Member	GO Biological Processes	GO:0061448	connective tissue development	-4.07425	-2.02028	8/208	652,2247,2303,4856,5915,6722,8091,84159	BMP4,FGF2,FOXC2,CCN3,RARB,SRF,HMGA2,ARID5B
15_Member	GO Biological Processes	GO:0030855	epithelial cell differentiation	-4.0401	-2.00091	13/549	182,652,2247,2303,5915,7357,10365,10411,10653,27077,54507,57619,57669	JAG1,BMP4,FGF2,FOXC2,RARB,UGCG,KLF2,RAPGEF3,SPINT2,B9D1,ADAMTSL4,SHROOM3,EPB41L5
15_Member	GO Biological Processes	GO:0061326	renal tubule development	-3.69129	-1.75284	5/80	182,652,2247,6772,8549	JAG1,BMP4,FGF2,STAT1,LGR5
15_Member	GO Biological Processes	GO:0061005	cell differentiation involved in kidney development	-3.55861	-1.64809	4/47	182,652,2303,6772	JAG1,BMP4,FOXC2,STAT1
15_Member	WikiPathways	WP2848	Pluripotent stem cell differentiation pathway	-3.52309	-1.62356	4/48	652,2247,3815,10468	BMP4,FGF2,KIT,FST
15_Member	GO Biological Processes	GO:0061318	renal filtration cell differentiation	-3.44564	-1.57171	3/21	182,652,2303	JAG1,BMP4,FOXC2
15_Member	GO Biological Processes	GO:0072112	glomerular visceral epithelial cell differentiation	-3.44564	-1.57171	3/21	182,652,2303	JAG1,BMP4,FOXC2
15_Member	GO Biological Processes	GO:0003158	endothelium development	-3.43048	-1.56236	5/91	182,652,2303,10411,90627	JAG1,BMP4,FOXC2,RAPGEF3,STARD13
15_Member	GO Biological Processes	GO:0072311	glomerular epithelial cell differentiation	-3.38411	-1.53753	3/22	182,652,2303	JAG1,BMP4,FOXC2
15_Member	WikiPathways	WP4830	GDNF/RET signaling axis	-3.32555	-1.49869	3/23	652,2303,2674	BMP4,FOXC2,GFRA1
15_Member	GO Biological Processes	GO:0032835	glomerulus development	-3.2952	-1.47743	4/55	182,652,2303,84623	JAG1,BMP4,FOXC2,KIRREL3
15_Member	GO Biological Processes	GO:0072010	glomerular epithelium development	-3.21632	-1.42108	3/25	182,652,2303	JAG1,BMP4,FOXC2
15_Member	GO Biological Processes	GO:0051216	cartilage development	-3.16829	-1.39674	6/157	652,2247,4856,5915,6722,8091	BMP4,FGF2,CCN3,RARB,SRF,HMGA2
15_Member	GO Biological Processes	GO:0003156	regulation of animal organ formation	-3.16521	-1.39674	3/26	652,2247,10370	BMP4,FGF2,CITED2
15_Member	GO Biological Processes	GO:0048333	mesodermal cell differentiation	-3.16521	-1.39674	3/26	652,2303,8091	BMP4,FOXC2,HMGA2
15_Member	GO Biological Processes	GO:1905330	regulation of morphogenesis of an epithelium	-3.01999	-1.28657	4/65	652,2247,3976,59277	BMP4,FGF2,LIF,NTN4
15_Member	WikiPathways	WP4304	Oligodendrocyte specification and differentiation, leading to myelin components for CNS	-2.93812	-1.22154	3/31	652,2247,3976	BMP4,FGF2,LIF
15_Member	GO Biological Processes	GO:1904888	cranial skeletal system development	-2.89955	-1.1913	4/70	652,2303,2304,7042	BMP4,FOXC2,FOXE1,TGFB2
15_Member	WikiPathways	WP4787	Osteoblast differentiation and related diseases	-2.88559	-1.18334	5/120	182,652,2247,2250,6772	JAG1,BMP4,FGF2,FGF5,STAT1
15_Member	GO Biological Processes	GO:0072006	nephron development	-2.76175	-1.09811	5/128	182,652,2247,2303,84623	JAG1,BMP4,FGF2,FOXC2,KIRREL3
15_Member	GO Biological Processes	GO:0072073	kidney epithelium development	-2.76175	-1.09811	5/128	182,652,2247,2303,5915	JAG1,BMP4,FGF2,FOXC2,RARB
15_Member	GO Biological Processes	GO:0035850	epithelial cell differentiation involved in kidney development	-2.74781	-1.08776	3/36	182,652,2303	JAG1,BMP4,FOXC2
15_Member	GO Biological Processes	GO:1905332	positive regulation of morphogenesis of an epithelium	-2.74781	-1.08776	3/36	652,2247,3976	BMP4,FGF2,LIF
15_Member	WikiPathways	WP236	Adipogenesis	-2.71762	-1.06378	5/131	652,1879,2303,3976,6772	BMP4,EBF1,FOXC2,LIF,STAT1
15_Member	GO Biological Processes	GO:0002065	columnar/cuboidal epithelial cell differentiation	-2.70532	-1.05586	4/79	652,2247,5915,27077	BMP4,FGF2,RARB,B9D1
15_Member	GO Biological Processes	GO:0001657	ureteric bud development	-2.64607	-1.01119	4/82	652,2247,2303,5915	BMP4,FGF2,FOXC2,RARB
15_Member	GO Biological Processes	GO:0072163	mesonephric epithelium development	-2.62687	-0.996185	4/83	652,2247,2303,5915	BMP4,FGF2,FOXC2,RARB
15_Member	GO Biological Processes	GO:0072164	mesonephric tubule development	-2.62687	-0.996185	4/83	652,2247,2303,5915	BMP4,FGF2,FOXC2,RARB
15_Member	GO Biological Processes	GO:0021983	pituitary gland development	-2.58439	-0.962798	3/41	652,2247,3625	BMP4,FGF2,INHBB
15_Member	GO Biological Processes	GO:0051784	negative regulation of nuclear division	-2.58439	-0.962798	3/41	652,3976,146691	BMP4,LIF,TOM1L2
15_Member	GO Biological Processes	GO:0001823	mesonephros development	-2.5526	-0.93884	4/87	652,2247,2303,5915	BMP4,FGF2,FOXC2,RARB
15_Member	KEGG Pathway	hsa04550	Signaling pathways regulating pluripotency of stem cells	-2.55233	-0.93884	5/143	652,2247,3625,3976,130399	BMP4,FGF2,INHBB,LIF,ACVR1C
15_Member	GO Biological Processes	GO:0060425	lung morphogenesis	-2.52505	-0.921085	3/43	652,3976,6722	BMP4,LIF,SRF
15_Member	GO Biological Processes	GO:0002067	glandular epithelial cell differentiation	-2.46866	-0.877851	3/45	652,2247,5915	BMP4,FGF2,RARB
15_Member	GO Biological Processes	GO:0060976	coronary vasculature development	-2.46866	-0.877851	3/45	652,2247,6722	BMP4,FGF2,SRF
15_Member	WikiPathways	WP1591	Heart development	-2.44149	-0.861222	3/46	652,2303,6722	BMP4,FOXC2,SRF
15_Member	GO Biological Processes	GO:0048661	positive regulation of smooth muscle cell proliferation	-2.41514	-0.844987	4/95	652,2247,4217,6772	BMP4,FGF2,MAP3K5,STAT1
15_Member	GO Biological Processes	GO:0030856	regulation of epithelial cell differentiation	-2.3792	-0.816417	5/157	182,652,2247,3976,6772	JAG1,BMP4,FGF2,LIF,STAT1
15_Member	GO Biological Processes	GO:0072009	nephron epithelium development	-2.35132	-0.797722	4/99	182,652,2247,2303	JAG1,BMP4,FGF2,FOXC2
15_Member	GO Biological Processes	GO:0061138	morphogenesis of a branching epithelium	-2.32182	-0.774479	5/162	652,2247,2303,6722,10653	BMP4,FGF2,FOXC2,SRF,SPINT2
15_Member	WikiPathways	WP2406	Cardiac progenitor differentiation	-2.26791	-0.73547	3/53	652,2247,3815	BMP4,FGF2,KIT
15_Member	GO Biological Processes	GO:0001763	morphogenesis of a branching structure	-2.22379	-0.703177	5/171	652,2247,2303,6722,10653	BMP4,FGF2,FOXC2,SRF,SPINT2
15_Member	Reactome Gene Sets	R-HSA-6785807	Interleukin-4 and Interleukin-13 signaling	-2.21805	-0.700022	4/108	2247,3976,6772,7157	FGF2,LIF,STAT1,TP53
15_Member	GO Biological Processes	GO:0010634	positive regulation of epithelial cell migration	-2.1925	-0.681509	5/174	652,2247,2303,7042,57669	BMP4,FGF2,FOXC2,TGFB2,EPB41L5
15_Member	GO Biological Processes	GO:0030324	lung development	-2.1925	-0.681509	5/174	652,2247,3976,6722,10365	BMP4,FGF2,LIF,SRF,KLF2
15_Member	GO Biological Processes	GO:0030323	respiratory tube development	-2.15181	-0.650225	5/178	652,2247,3976,6722,10365	BMP4,FGF2,LIF,SRF,KLF2
15_Member	WikiPathways	WP3931	Embryonic stem cell pluripotency pathways	-2.07182	-0.589057	4/119	652,2247,2250,3976	BMP4,FGF2,FGF5,LIF
15_Member	GO Biological Processes	GO:2000242	negative regulation of reproductive process	-2.05983	-0.579437	3/63	652,3976,130399	BMP4,LIF,ACVR1C
15_Member	GO Biological Processes	GO:0030858	positive regulation of epithelial cell differentiation	-2.02268	-0.550479	3/65	652,2247,3976	BMP4,FGF2,LIF
16_Summary	GO Biological Processes	GO:0009612	response to mechanical stimulus	-6.90868	-4.14177	11/201	2934,3485,3728,3815,6772,7832,8795,9379,10370,27063,63982	GSN,IGFBP2,JUP,KIT,STAT1,BTG2,TNFRSF10B,NRXN2,CITED2,ANKRD1,ANO3
16_Member	GO Biological Processes	GO:0009612	response to mechanical stimulus	-6.90868	-4.14177	11/201	2934,3485,3728,3815,6772,7832,8795,9379,10370,27063,63982	GSN,IGFBP2,JUP,KIT,STAT1,BTG2,TNFRSF10B,NRXN2,CITED2,ANKRD1,ANO3
16_Member	GO Biological Processes	GO:0050982	detection of mechanical stimulus	-2.31478	-0.769503	3/51	3728,3815,63982	JUP,KIT,ANO3
17_Summary	GO Biological Processes	GO:0003206	cardiac chamber morphogenesis	-6.72727	-4.01405	9/126	182,652,2303,6091,6722,7042,7134,7157,10370,3815,3955,4856,10395,27063,2674,5915,10468,2247,2250,3625,3976,5272,5328,6383,8492,9672,54507,54583,161198,223117,255324,10052,2615,130399,4915,5205,8549,27077,23090,196883,10653,3575,8795,84962,6772,55679,7286	JAG1,BMP4,FOXC2,ROBO1,SRF,TGFB2,TNNC1,TP53,CITED2,KIT,LFNG,CCN3,DLC1,ANKRD1,GFRA1,RARB,FST,FGF2,FGF5,INHBB,LIF,SERPINB9,PLAU,SDC2,PRSS12,SDC3,ADAMTSL4,EGLN1,CLEC14A,SEMA3D,EPGN,GJC1,LRRC32,ACVR1C,NTRK2,ATP8B1,LGR5,B9D1,ZNF423,ADCY4,SPINT2,IL7R,TNFRSF10B,AJUBA,STAT1,LIMS2,TUFT1
17_Member	GO Biological Processes	GO:0003206	cardiac chamber morphogenesis	-6.72727	-4.01405	9/126	182,652,2303,6091,6722,7042,7134,7157,10370	JAG1,BMP4,FOXC2,ROBO1,SRF,TGFB2,TNNC1,TP53,CITED2
17_Member	GO Biological Processes	GO:0045747	positive regulation of Notch signaling pathway	-6.09386	-3.52533	6/48	182,3815,3955,4856,6091,7042	JAG1,KIT,LFNG,CCN3,ROBO1,TGFB2
17_Member	GO Biological Processes	GO:0003007	heart morphogenesis	-5.96579	-3.4115	11/250	182,652,2303,6091,6722,7042,7134,7157,10370,10395,27063	JAG1,BMP4,FOXC2,ROBO1,SRF,TGFB2,TNNC1,TP53,CITED2,DLC1,ANKRD1
17_Member	GO Biological Processes	GO:0003205	cardiac chamber development	-5.69668	-3.18884	9/167	182,652,2303,6091,6722,7042,7134,7157,10370	JAG1,BMP4,FOXC2,ROBO1,SRF,TGFB2,TNNC1,TP53,CITED2
17_Member	WikiPathways	WP5053	Development of ureteric collection system	-5.51218	-3.03473	6/60	652,2674,5915,6091,7042,10468	BMP4,GFRA1,RARB,ROBO1,TGFB2,FST
17_Member	GO Biological Processes	GO:0060840	artery development	-5.41114	-2.95351	7/96	182,652,2303,6091,6722,7042,10370	JAG1,BMP4,FOXC2,ROBO1,SRF,TGFB2,CITED2
17_Member	GO Biological Processes	GO:0003184	pulmonary valve morphogenesis	-5.36522	-2.92702	4/17	182,652,6091,7042	JAG1,BMP4,ROBO1,TGFB2
17_Member	GO Biological Processes	GO:0048844	artery morphogenesis	-5.15465	-2.74748	6/69	182,652,2303,6722,7042,10370	JAG1,BMP4,FOXC2,SRF,TGFB2,CITED2
17_Member	GO Biological Processes	GO:0060411	cardiac septum morphogenesis	-5.0822	-2.68976	6/71	182,652,6091,7042,7157,10370	JAG1,BMP4,ROBO1,TGFB2,TP53,CITED2
17_Member	GO Biological Processes	GO:0061156	pulmonary artery morphogenesis	-4.99541	-2.65068	3/7	182,652,10370	JAG1,BMP4,CITED2
17_Member	GO Biological Processes	GO:0003177	pulmonary valve development	-4.97384	-2.64418	4/21	182,652,6091,7042	JAG1,BMP4,ROBO1,TGFB2
17_Member	Canonical Pathways	M5885	NABA MATRISOME ASSOCIATED	-4.87182	-2.56653	17/751	652,2247,2250,3625,3976,5272,5328,6383,7042,8492,9672,10468,54507,54583,161198,223117,255324	BMP4,FGF2,FGF5,INHBB,LIF,SERPINB9,PLAU,SDC2,TGFB2,PRSS12,SDC3,FST,ADAMTSL4,EGLN1,CLEC14A,SEMA3D,EPGN
17_Member	GO Biological Processes	GO:0003197	endocardial cushion development	-4.85541	-2.55794	5/46	182,652,6091,7042,10370	JAG1,BMP4,ROBO1,TGFB2,CITED2
17_Member	GO Biological Processes	GO:0007507	heart development	-4.72089	-2.46363	14/542	182,652,2247,2303,5915,6091,6722,7042,7134,7157,10052,10370,10395,27063	JAG1,BMP4,FGF2,FOXC2,RARB,ROBO1,SRF,TGFB2,TNNC1,TP53,GJC1,CITED2,DLC1,ANKRD1
17_Member	GO Biological Processes	GO:0003231	cardiac ventricle development	-4.63419	-2.40822	7/126	182,652,2303,6091,7042,7134,10370	JAG1,BMP4,FOXC2,ROBO1,TGFB2,TNNC1,CITED2
17_Member	GO Biological Processes	GO:0007178	transmembrane receptor protein serine/threonine kinase signaling pathway	-4.41556	-2.25072	8/186	652,2615,3625,7042,7157,10370,10468,130399	BMP4,LRRC32,INHBB,TGFB2,TP53,CITED2,FST,ACVR1C
17_Member	GO Biological Processes	GO:1902893	regulation of pri-miRNA transcription by RNA polymerase II	-4.32342	-2.19158	5/59	652,2247,6722,7042,7157	BMP4,FGF2,SRF,TGFB2,TP53
17_Member	GO Biological Processes	GO:0008593	regulation of Notch signaling pathway	-4.3059	-2.18452	6/97	182,3815,3955,4856,6091,7042	JAG1,KIT,LFNG,CCN3,ROBO1,TGFB2
17_Member	GO Biological Processes	GO:0003279	cardiac septum development	-4.09038	-2.02699	6/106	182,652,6091,7042,7157,10370	JAG1,BMP4,ROBO1,TGFB2,TP53,CITED2
17_Member	GO Biological Processes	GO:0035051	cardiocyte differentiation	-3.89464	-1.89037	6/115	182,652,5915,6722,7042,10370	JAG1,BMP4,RARB,SRF,TGFB2,CITED2
17_Member	GO Biological Processes	GO:0003151	outflow tract morphogenesis	-3.79627	-1.81507	5/76	182,652,6091,7042,10370	JAG1,BMP4,ROBO1,TGFB2,CITED2
17_Member	GO Biological Processes	GO:1905314	semi-lunar valve development	-3.79085	-1.81338	4/41	182,652,6091,7042	JAG1,BMP4,ROBO1,TGFB2
17_Member	GO Biological Processes	GO:0060412	ventricular septum morphogenesis	-3.74965	-1.77954	4/42	652,6091,7042,10370	BMP4,ROBO1,TGFB2,CITED2
17_Member	GO Biological Processes	GO:1902895	positive regulation of pri-miRNA transcription by RNA polymerase II	-3.63222	-1.70878	4/45	2247,6722,7042,7157	FGF2,SRF,TGFB2,TP53
17_Member	WikiPathways	WP3927	BMP signaling in eyelid development	-3.51045	-1.61555	3/20	652,2303,3625	BMP4,FOXC2,INHBB
17_Member	GO Biological Processes	GO:0007423	sensory organ development	-3.44013	-1.56766	12/551	182,652,2303,3815,4915,5205,5915,6722,7042,8549,10370,27077	JAG1,BMP4,FOXC2,KIT,NTRK2,ATP8B1,RARB,SRF,TGFB2,LGR5,CITED2,B9D1
17_Member	KEGG Pathway	hsa04350	TGF-beta signaling pathway	-3.36549	-1.52321	5/94	652,3625,7042,10468,130399	BMP4,INHBB,TGFB2,FST,ACVR1C
17_Member	GO Biological Processes	GO:0090092	regulation of transmembrane receptor protein serine/threonine kinase signaling pathway	-3.33845	-1.50764	8/267	652,3625,4856,7042,7157,10370,10468,23090	BMP4,INHBB,CCN3,TGFB2,TP53,CITED2,FST,ZNF423
17_Member	GO Biological Processes	GO:0003179	heart valve morphogenesis	-3.2952	-1.47743	4/55	182,652,6091,7042	JAG1,BMP4,ROBO1,TGFB2
17_Member	GO Biological Processes	GO:0003148	outflow tract septum morphogenesis	-3.21632	-1.42108	3/25	652,6091,7042	BMP4,ROBO1,TGFB2
17_Member	GO Biological Processes	GO:0035904	aorta development	-3.20716	-1.41798	4/58	182,6091,6722,7042	JAG1,ROBO1,SRF,TGFB2
17_Member	GO Biological Processes	GO:0042490	mechanoreceptor differentiation	-3.12402	-1.36393	4/61	182,652,4915,5205	JAG1,BMP4,NTRK2,ATP8B1
17_Member	GO Biological Processes	GO:0001654	eye development	-3.08805	-1.33796	9/364	182,652,2303,4915,5915,6722,7042,10370,27077	JAG1,BMP4,FOXC2,NTRK2,RARB,SRF,TGFB2,CITED2,B9D1
17_Member	GO Biological Processes	GO:0150063	visual system development	-3.05473	-1.30889	9/368	182,652,2303,4915,5915,6722,7042,10370,27077	JAG1,BMP4,FOXC2,NTRK2,RARB,SRF,TGFB2,CITED2,B9D1
17_Member	GO Biological Processes	GO:0003170	heart valve development	-3.01999	-1.28657	4/65	182,652,6091,7042	JAG1,BMP4,ROBO1,TGFB2
17_Member	GO Biological Processes	GO:0048880	sensory system development	-3.00563	-1.2749	9/374	182,652,2303,4915,5915,6722,7042,10370,27077	JAG1,BMP4,FOXC2,NTRK2,RARB,SRF,TGFB2,CITED2,B9D1
17_Member	GO Biological Processes	GO:0003180	aortic valve morphogenesis	-2.8975	-1.1913	3/32	182,652,6091	JAG1,BMP4,ROBO1
17_Member	GO Biological Processes	GO:0035909	aorta morphogenesis	-2.8975	-1.1913	3/32	182,6722,7042	JAG1,SRF,TGFB2
17_Member	GO Biological Processes	GO:0090100	positive regulation of transmembrane receptor protein serine/threonine kinase signaling pathway	-2.88559	-1.18334	5/120	652,3625,7042,10370,23090	BMP4,INHBB,TGFB2,CITED2,ZNF423
17_Member	GO Biological Processes	GO:0043010	camera-type eye development	-2.84857	-1.15894	8/318	182,652,2303,4915,6722,7042,10370,27077	JAG1,BMP4,FOXC2,NTRK2,SRF,TGFB2,CITED2,B9D1
17_Member	GO Biological Processes	GO:0003281	ventricular septum development	-2.83183	-1.1479	4/73	652,6091,7042,10370	BMP4,ROBO1,TGFB2,CITED2
17_Member	GO Biological Processes	GO:0003176	aortic valve development	-2.71322	-1.06201	3/37	182,652,6091	JAG1,BMP4,ROBO1
17_Member	WikiPathways	WP4331	Neovascularisation processes	-2.71322	-1.06201	3/37	182,3815,7042	JAG1,KIT,TGFB2
17_Member	Canonical Pathways	M5883	NABA SECRETED FACTORS	-2.64385	-1.00981	8/343	652,2247,2250,3625,3976,7042,10468,255324	BMP4,FGF2,FGF5,INHBB,LIF,TGFB2,FST,EPGN
17_Member	GO Biological Processes	GO:0048592	eye morphogenesis	-2.46334	-0.875567	5/150	182,652,4915,5915,10370	JAG1,BMP4,NTRK2,RARB,CITED2
17_Member	WikiPathways	WP4535	Envelope proteins and their potential roles in EDMD physiopathology	-2.44149	-0.861222	3/46	6722,7042,196883	SRF,TGFB2,ADCY4
17_Member	GO Biological Processes	GO:0071772	response to BMP	-2.43158	-0.857216	4/94	652,7042,10468,10653	BMP4,TGFB2,FST,SPINT2
17_Member	GO Biological Processes	GO:0071773	cellular response to BMP stimulus	-2.43158	-0.857216	4/94	652,7042,10468,10653	BMP4,TGFB2,FST,SPINT2
17_Member	KEGG Pathway	hsa04060	Cytokine-cytokine receptor interaction	-2.41517	-0.844987	7/295	652,3575,3625,3976,7042,8795,130399	BMP4,IL7R,INHBB,LIF,TGFB2,TNFRSF10B,ACVR1C
17_Member	GO Biological Processes	GO:0002011	morphogenesis of an epithelial sheet	-2.36375	-0.806642	3/49	182,6722,84962	JAG1,SRF,AJUBA
17_Member	GO Biological Processes	GO:0010862	positive regulation of pathway-restricted SMAD protein phosphorylation	-2.36375	-0.806642	3/49	652,3625,7042	BMP4,INHBB,TGFB2
17_Member	GO Biological Processes	GO:0050680	negative regulation of epithelial cell proliferation	-2.32182	-0.774479	5/162	652,6091,6772,7042,55679	BMP4,ROBO1,STAT1,TGFB2,LIMS2
17_Member	GO Biological Processes	GO:0010718	positive regulation of epithelial to mesenchymal transition	-2.26791	-0.73547	3/53	182,652,7042	JAG1,BMP4,TGFB2
17_Member	GO Biological Processes	GO:0060113	inner ear receptor cell differentiation	-2.20116	-0.688261	3/56	182,652,5205	JAG1,BMP4,ATP8B1
17_Member	GO Biological Processes	GO:0060395	SMAD protein signal transduction	-2.09834	-0.608385	3/61	652,3625,7042	BMP4,INHBB,TGFB2
17_Member	GO Biological Processes	GO:0042476	odontogenesis	-2.08444	-0.595092	4/118	652,7042,7286,10468	BMP4,TGFB2,TUFT1,FST
17_Member	GO Biological Processes	GO:0060393	regulation of pathway-restricted SMAD protein phosphorylation	-2.07891	-0.593164	3/62	652,3625,7042	BMP4,INHBB,TGFB2
17_Member	GO Biological Processes	GO:0048839	inner ear development	-2.03624	-0.559012	5/190	182,652,5205,7042,8549	JAG1,BMP4,ATP8B1,TGFB2,LGR5
17_Member	GO Biological Processes	GO:0048593	camera-type eye morphogenesis	-2.03471	-0.559012	4/122	182,652,4915,10370	JAG1,BMP4,NTRK2,CITED2
18_Summary	GO Biological Processes	GO:0048589	developmental growth	-6.65558	-3.96211	14/369	652,2303,4856,5915,6722,7042,7157,10365,23371,26999,57669,84159,114798,130399	BMP4,FOXC2,CCN3,RARB,SRF,TGFB2,TP53,KLF2,TNS2,CYFIP2,EPB41L5,ARID5B,SLITRK1,ACVR1C
18_Member	GO Biological Processes	GO:0048589	developmental growth	-6.65558	-3.96211	14/369	652,2303,4856,5915,6722,7042,7157,10365,23371,26999,57669,84159,114798,130399	BMP4,FOXC2,CCN3,RARB,SRF,TGFB2,TP53,KLF2,TNS2,CYFIP2,EPB41L5,ARID5B,SLITRK1,ACVR1C
18_Member	GO Biological Processes	GO:0040007	growth	-6.62719	-3.9526	14/371	652,2303,4856,5915,6722,7042,7157,10365,23371,26999,57669,84159,114798,130399	BMP4,FOXC2,CCN3,RARB,SRF,TGFB2,TP53,KLF2,TNS2,CYFIP2,EPB41L5,ARID5B,SLITRK1,ACVR1C
18_Member	GO Biological Processes	GO:0035264	multicellular organism growth	-4.72041	-2.46363	6/82	5915,7157,10365,23371,84159,114798	RARB,TP53,KLF2,TNS2,ARID5B,SLITRK1
19_Summary	GO Biological Processes	GO:0048872	homeostasis of number of cells	-6.2117	-3.6124	11/236	558,652,2149,3575,3815,4856,6722,10019,10365,10370,51301,182,2304,3955,7042,7157,9760,10468,23218,84623,3728,5915,23508,4915,7832,9379,10411,85446,114798,10125,2151,375033	AXL,BMP4,F2R,IL7R,KIT,CCN3,SRF,SH2B3,KLF2,CITED2,GCNT4,JAG1,FOXE1,LFNG,TGFB2,TP53,TOX,FST,NBEAL2,KIRREL3,JUP,RARB,TTC9,NTRK2,BTG2,NRXN2,RAPGEF3,ZFHX2,SLITRK1,RASGRP1,F2RL2,PEAR1
19_Member	GO Biological Processes	GO:0048872	homeostasis of number of cells	-6.2117	-3.6124	11/236	558,652,2149,3575,3815,4856,6722,10019,10365,10370,51301	AXL,BMP4,F2R,IL7R,KIT,CCN3,SRF,SH2B3,KLF2,CITED2,GCNT4
19_Member	GO Biological Processes	GO:0048534	hematopoietic or lymphoid organ development	-5.75775	-3.23713	17/643	182,558,652,2304,3575,3815,3955,6722,7042,7157,9760,10019,10365,10370,10468,23218,84623	JAG1,AXL,BMP4,FOXE1,IL7R,KIT,LFNG,SRF,TGFB2,TP53,TOX,SH2B3,KLF2,CITED2,FST,NBEAL2,KIRREL3
19_Member	GO Biological Processes	GO:0030097	hemopoiesis	-5.55167	-3.06231	16/594	182,558,652,3575,3815,3955,6722,7042,7157,9760,10019,10365,10370,10468,23218,84623	JAG1,AXL,BMP4,IL7R,KIT,LFNG,SRF,TGFB2,TP53,TOX,SH2B3,KLF2,CITED2,FST,NBEAL2,KIRREL3
19_Member	GO Biological Processes	GO:0002520	immune system development	-5.4081	-2.95351	17/683	182,558,652,2304,3575,3815,3955,6722,7042,7157,9760,10019,10365,10370,10468,23218,84623	JAG1,AXL,BMP4,FOXE1,IL7R,KIT,LFNG,SRF,TGFB2,TP53,TOX,SH2B3,KLF2,CITED2,FST,NBEAL2,KIRREL3
19_Member	GO Biological Processes	GO:0090136	epithelial cell-cell adhesion	-5.36522	-2.92702	4/17	3728,3815,4856,6722	JUP,KIT,CCN3,SRF
19_Member	GO Biological Processes	GO:0034101	erythrocyte homeostasis	-5.35132	-2.91845	7/98	558,652,3815,6722,10019,10365,10370	AXL,BMP4,KIT,SRF,SH2B3,KLF2,CITED2
19_Member	GO Biological Processes	GO:0002262	myeloid cell homeostasis	-4.77162	-2.49681	7/120	558,652,3815,6722,10019,10365,10370	AXL,BMP4,KIT,SRF,SH2B3,KLF2,CITED2
19_Member	GO Biological Processes	GO:0030218	erythrocyte differentiation	-4.51725	-2.31979	6/89	652,3815,6722,10019,10365,10370	BMP4,KIT,SRF,SH2B3,KLF2,CITED2
19_Member	GO Biological Processes	GO:0002244	hematopoietic progenitor cell differentiation	-4.38278	-2.22626	6/94	652,3815,6722,7157,10370,10468	BMP4,KIT,SRF,TP53,CITED2,FST
19_Member	GO Biological Processes	GO:0060348	bone development	-4.22384	-2.12267	8/198	652,3815,5915,6722,7157,10019,10370,23508	BMP4,KIT,RARB,SRF,TP53,SH2B3,CITED2,TTC9
19_Member	GO Biological Processes	GO:0061515	myeloid cell development	-4.18546	-2.09885	5/63	3815,6722,10019,10365,10370	KIT,SRF,SH2B3,KLF2,CITED2
19_Member	GO Biological Processes	GO:0048821	erythrocyte development	-4.01484	-1.98412	4/36	6722,10019,10365,10370	SRF,SH2B3,KLF2,CITED2
19_Member	GO Biological Processes	GO:0035855	megakaryocyte development	-3.72842	-1.76912	3/17	3815,6722,10019	KIT,SRF,SH2B3
19_Member	GO Biological Processes	GO:0030219	megakaryocyte differentiation	-3.38411	-1.53753	3/22	3815,6722,10019	KIT,SRF,SH2B3
19_Member	GO Biological Processes	GO:0007612	learning	-3.35035	-1.51555	6/145	3815,4915,6722,7832,9379,10411	KIT,NTRK2,SRF,BTG2,NRXN2,RAPGEF3
19_Member	GO Biological Processes	GO:0030217	T cell differentiation	-3.27242	-1.46481	6/150	3575,3815,3955,6722,7157,9760	IL7R,KIT,LFNG,SRF,TP53,TOX
19_Member	GO Biological Processes	GO:0098751	bone cell development	-3.21632	-1.42108	3/25	3815,6722,10019	KIT,SRF,SH2B3
19_Member	GO Biological Processes	GO:0002521	leukocyte differentiation	-3.16478	-1.39674	9/355	558,652,3575,3815,3955,6722,7157,9760,10370	AXL,BMP4,IL7R,KIT,LFNG,SRF,TP53,TOX,CITED2
19_Member	GO Biological Processes	GO:1903131	mononuclear cell differentiation	-3.08478	-1.33578	8/292	558,652,3575,3815,3955,6722,7157,9760	AXL,BMP4,IL7R,KIT,LFNG,SRF,TP53,TOX
19_Member	GO Biological Processes	GO:0030099	myeloid cell differentiation	-3.01292	-1.28113	7/231	652,3815,6722,10019,10365,10370,23218	BMP4,KIT,SRF,SH2B3,KLF2,CITED2,NBEAL2
19_Member	GO Biological Processes	GO:0045987	positive regulation of smooth muscle contraction	-2.93812	-1.22154	3/31	2149,3815,6722	F2R,KIT,SRF
19_Member	GO Biological Processes	GO:0007610	behavior	-2.81773	-1.13943	11/563	3815,4915,6722,7157,7832,9379,10411,51301,84623,85446,114798	KIT,NTRK2,SRF,TP53,BTG2,NRXN2,RAPGEF3,GCNT4,KIRREL3,ZFHX2,SLITRK1
19_Member	GO Biological Processes	GO:0030098	lymphocyte differentiation	-2.77633	-1.10746	7/254	558,3575,3815,3955,6722,7157,9760	AXL,IL7R,KIT,LFNG,SRF,TP53,TOX
19_Member	GO Biological Processes	GO:0042110	T cell activation	-2.76666	-1.10031	7/255	3575,3815,3955,6722,7157,9760,10125	IL7R,KIT,LFNG,SRF,TP53,TOX,RASGRP1
19_Member	GO Biological Processes	GO:0008306	associative learning	-2.68529	-1.04051	4/80	3815,6722,7832,10411	KIT,SRF,BTG2,RAPGEF3
19_Member	GO Biological Processes	GO:0051150	regulation of smooth muscle cell differentiation	-2.52505	-0.921085	3/43	652,3815,6722	BMP4,KIT,SRF
19_Member	GO Biological Processes	GO:0045933	positive regulation of muscle contraction	-2.46866	-0.877851	3/45	2149,3815,6722	F2R,KIT,SRF
19_Member	GO Biological Processes	GO:0001775	cell activation	-2.41215	-0.842891	11/636	558,2149,2151,3575,3815,3955,6722,7157,9760,10125,375033	AXL,F2R,F2RL2,IL7R,KIT,LFNG,SRF,TP53,TOX,RASGRP1,PEAR1
19_Member	GO Biological Processes	GO:0070661	leukocyte proliferation	-2.38285	-0.817247	4/97	3575,3815,7157,10125	IL7R,KIT,TP53,RASGRP1
19_Member	GO Biological Processes	GO:0042113	B cell activation	-2.26656	-0.735454	5/167	3575,3815,3955,7157,10125	IL7R,KIT,LFNG,TP53,RASGRP1
19_Member	GO Biological Processes	GO:0046649	lymphocyte activation	-2.19955	-0.687289	8/407	558,3575,3815,3955,6722,7157,9760,10125	AXL,IL7R,KIT,LFNG,SRF,TP53,TOX,RASGRP1
19_Member	GO Biological Processes	GO:0007611	learning or memory	-2.05066	-0.571439	6/264	3815,4915,6722,7832,9379,10411	KIT,NTRK2,SRF,BTG2,NRXN2,RAPGEF3
19_Member	GO Biological Processes	GO:0006940	regulation of smooth muscle contraction	-2.02268	-0.550479	3/65	2149,3815,6722	F2R,KIT,SRF
20_Summary	GO Biological Processes	GO:0043065	positive regulation of apoptotic process	-6.20321	-3.6124	16/529	274,467,652,2934,3625,4217,5915,7042,7157,7164,8091,8795,10395,27063,54507,130399	BIN1,ATF3,BMP4,GSN,INHBB,MAP3K5,RARB,TGFB2,TP53,TPD52L1,HMGA2,TNFRSF10B,DLC1,ANKRD1,ADAMTSL4,ACVR1C
20_Member	GO Biological Processes	GO:0043065	positive regulation of apoptotic process	-6.20321	-3.6124	16/529	274,467,652,2934,3625,4217,5915,7042,7157,7164,8091,8795,10395,27063,54507,130399	BIN1,ATF3,BMP4,GSN,INHBB,MAP3K5,RARB,TGFB2,TP53,TPD52L1,HMGA2,TNFRSF10B,DLC1,ANKRD1,ADAMTSL4,ACVR1C
20_Member	GO Biological Processes	GO:0043068	positive regulation of programmed cell death	-6.05459	-3.49324	16/543	274,467,652,2934,3625,4217,5915,7042,7157,7164,8091,8795,10395,27063,54507,130399	BIN1,ATF3,BMP4,GSN,INHBB,MAP3K5,RARB,TGFB2,TP53,TPD52L1,HMGA2,TNFRSF10B,DLC1,ANKRD1,ADAMTSL4,ACVR1C
20_Member	GO Biological Processes	GO:0010942	positive regulation of cell death	-5.45952	-2.99365	16/604	274,467,652,2934,3625,4217,5915,7042,7157,7164,8091,8795,10395,27063,54507,130399	BIN1,ATF3,BMP4,GSN,INHBB,MAP3K5,RARB,TGFB2,TP53,TPD52L1,HMGA2,TNFRSF10B,DLC1,ANKRD1,ADAMTSL4,ACVR1C
