# Supplementary material for: Transcriptional profiling of Hutchinson-Gilford Progeria syndrome fibroblasts reveals deficits in mesenchymal stem cell commitment to differentiation related to early events in endochondral ossification
Source: eLife journal article supplement (doi:10.7554/elife.81290), 2022-12-29
Supplement: table2-data1 [file metascape_result.xlsx]

## Sheet: Annotation
MyList	Gene ID	Type	Tax ID	Homologene Gene ID	Homologene Gene Tax ID	Gene Symbol	Description	Biological Process (GO)	Kinase Class (UniProt)	Protein Function (Protein Atlas)	Subcellular Location (Protein Atlas)	Drug (DrugBank)	Canonical Pathways	Hallmark Gene Sets	GO:0007420 brain development	GO:0001501 skeletal system development	WP5087 Malignant pleural mesothelioma	hsa05200 Pathways in cancer	WP2447 Amyotrophic lateral sclerosis	GO:0060284 regulation of cell development	GO:0035239 tube morphogenesis	GO:0048812 neuron projection morphogenesi	GO:0010035 response to inorganic substanc	GO:1901214 regulation of neuron death	GO:0007163 establishment or maintenance o	GO:0007167 enzyme linked receptor protein	GO:0003149 membranous septum morphogenesi	hsa05414 Dilated cardiomyopathy	WP4540 Hippo signaling regulation pat	GO:2000736 regulation of stem cell differ	GO:1903829 positive regulation of protein	GO:0034097 response to cytokine	GO:0071496 cellular response to external	GO:0043588 skin development
ALX4	60529	symbol	H. sapiens	60529	H. sapiens	ALX4	ALX homeobox 4	GO:0035116 embryonic hindlimb morphogenesis;GO:0035115 embryonic forelimb morphogenesis;GO:0035137 hindlimb morphogenesis		Transcription factors:Helix-turn-helix domains; Human disease related genes:Congenital malformations:Congenital malformations of the musculoskeletal system; Human disease related genes:Congenital malformations:Other congenital malformations; Disease related genes; Predicted intracellular proteins	Nucleoplasm (Supported)				0.0	1.0	0.0	0.0	0.0	0.0	0.0	0.0	0.0	0.0	0.0	0.0	0.0	0.0	0.0	0.0	0.0	0.0	0.0	1.0
NTRK2	4915	symbol	H. sapiens	4915	H. sapiens	NTRK2	neurotrophic receptor tyrosine kinase 2	GO:0099540 trans-synaptic signaling by neuropeptide;GO:0099551 trans-synaptic signaling by neuropeptide, modulating synaptic transmission;GO:0099538 synaptic signaling via neuropeptide	Tyr protein kinase family	Human disease related genes:Nervous system diseases:Epilepsy; FDA approved drug targets:Small molecule drugs; Cancer-related genes:Candidate cancer biomarkers; Human disease related genes:Cancers:Cancers of eye, brain, and central nervous system; Kinases:Tyr protein kinases; Disease related genes; Enzymes; RAS pathway related proteins; ENZYME proteins:Transferases	Plasma membrane (Supported)	Amitriptyline; Esketamine; Entrectinib; Fostamatinib; Larotrectinib	(M142)PID AJDISS 2PATHWAY; (M100)PID SHP2 PATHWAY; (M187)PID TRKR PATHWAY		1.0	1.0	1.0	0.0	0.0	1.0	1.0	0.0	0.0	1.0	0.0	1.0	0.0	0.0	1.0	0.0	0.0	0.0	0.0	1.0
SLITRK1	114798	symbol	H. sapiens	114798	H. sapiens	SLITRK1	SLIT and NTRK like family member 1	GO:0099560 synaptic membrane adhesion;GO:0099174 regulation of presynapse organization;GO:1905606 regulation of presynapse assembly		Predicted secreted proteins; Human disease related genes:Other diseases:Mental and behavioural disorders; Disease related genes					0.0	0.0	0.0	0.0	1.0	1.0	0.0	1.0	0.0	0.0	0.0	0.0	0.0	0.0	0.0	0.0	0.0	0.0	0.0	0.0
FZD2	2535	symbol	H. sapiens	2535	H. sapiens	FZD2	frizzled class receptor 2	GO:0003150 muscular septum morphogenesis;GO:0003149 membranous septum morphogenesis;GO:0060022 hard palate development		Cancer-related genes:Candidate cancer biomarkers; Human disease related genes:Congenital malformations:Congenital malformations of the musculoskeletal system; G-protein coupled receptors:Family fz/smo receptors; Disease related genes; G-protein coupled receptors:GPCRs excl olfactory receptors; Potential drug targets	Nuclear bodies;Nucleoplasm (Approved); Additional: Cell Junctions		(M77)PID WNT SIGNALING PATHWAY; (M23)PID WNT NONCANONICAL PATHWAY; (M5493)WNT SIGNALING	(M5942)HALLMARK UV RESPONSE DN	0.0	1.0	1.0	1.0	1.0	0.0	1.0	0.0	0.0	0.0	0.0	0.0	1.0	0.0	0.0	1.0	0.0	0.0	0.0	0.0
GLCCI1	113263	symbol	H. sapiens	113263	H. sapiens	GLCCI1	glucocorticoid induced 1			Predicted intracellular proteins	Nucleoli (Approved)				0.0	0.0	0.0	0.0	0.0	0.0	0.0	0.0	0.0	0.0	0.0	0.0	0.0	0.0	0.0	0.0	0.0	0.0	0.0	0.0
C20orf197	284756	gene_synonym	H. sapiens	284756	H. sapiens	LINC02910	long intergenic non-protein coding RNA 2910								0.0	0.0	0.0	0.0	0.0	0.0	0.0	0.0	0.0	0.0	0.0	0.0	0.0	0.0	0.0	0.0	0.0	0.0	0.0	0.0
APOA1BP	128240	gene_synonym	H. sapiens	128240	H. sapiens	NAXE	NAD(P)HX epimerase	GO:0031580 membrane raft distribution;GO:0051665 membrane raft localization;GO:0031579 membrane raft organization		Predicted secreted proteins; Disease related genes; Potential drug targets; Enzymes; ENZYME proteins:Isomerase; Human disease related genes:Nervous system diseases:Neurodegenerative diseases	Nucleoplasm (Approved); Additional: Cytosol;Vesicles				0.0	0.0	0.0	0.0	0.0	0.0	1.0	0.0	0.0	0.0	0.0	0.0	0.0	0.0	0.0	0.0	0.0	0.0	0.0	0.0
DCC	1630	symbol	H. sapiens	1630	H. sapiens	DCC	DCC netrin 1 receptor	GO:0033563 dorsal/ventral axon guidance;GO:0021965 spinal cord ventral commissure morphogenesis;GO:2000171 negative regulation of dendrite development		Human disease related genes:Cancers:Cancers of the digestive system; Human disease related genes:Nervous system diseases:Other nervous and sensory system diseases; Cancer-related genes:Candidate cancer biomarkers; Disease related genes; Predicted intracellular proteins	Golgi apparatus (Approved)		(M108)PID NETRIN PATHWAY	(M5951)HALLMARK SPERMATOGENESIS; (M5956)HALLMARK KRAS SIGNALING DN	0.0	0.0	0.0	1.0	0.0	1.0	0.0	1.0	0.0	1.0	0.0	1.0	0.0	0.0	0.0	0.0	0.0	0.0	1.0	0.0
STX6	10228	symbol	H. sapiens	10228	H. sapiens	STX6	syntaxin 6	GO:0016189 synaptic vesicle to endosome fusion;GO:0099532 synaptic vesicle endosomal processing;GO:0090161 Golgi ribbon formation		Transporters:Transporter channels and pores	Golgi apparatus (Enhanced); Additional: Nucleoplasm				0.0	0.0	0.0	0.0	0.0	0.0	0.0	0.0	0.0	0.0	0.0	0.0	0.0	0.0	0.0	0.0	0.0	0.0	0.0	0.0
DUSP8	1850	symbol	H. sapiens	1850	H. sapiens	DUSP8	dual specificity phosphatase 8	GO:0035335 peptidyl-tyrosine dephosphorylation;GO:0043409 negative regulation of MAPK cascade;GO:0006470 protein dephosphorylation		Enzymes; ENZYME proteins:Hydrolases; Predicted intracellular proteins	Cytosol (Approved)		(M76)PID P38 ALPHA BETA PATHWAY; (M166)PID ATF2 PATHWAY		0.0	0.0	1.0	0.0	0.0	0.0	0.0	0.0	0.0	0.0	0.0	0.0	0.0	0.0	0.0	0.0	0.0	0.0	1.0	0.0
JUP	3728	symbol	H. sapiens	3728	H. sapiens	JUP	junction plakoglobin	GO:0071603 endothelial cell-cell adhesion;GO:0002159 desmosome assembly;GO:0071681 cellular response to indole-3-methanol		Cancer-related genes:Candidate cancer biomarkers; Human disease related genes:Congenital malformations:Congenital malformations of the circulatory system; Human disease related genes:Cardiovascular diseases:Cardiac diseases; Disease related genes; Predicted intracellular proteins	Cell Junctions;Plasma membrane (Supported); Additional: Vesicles	Zinc; Zinc acetate	(M184)PID ECADHERIN KERATINOCYTE PATHWAY; (M266)PID NCADHERIN PATHWAY; (M156)PID ECADHERIN NASCENT AJ PATHWAY	(M5915)HALLMARK APICAL JUNCTION; (M5934)HALLMARK XENOBIOTIC METABOLISM; (M5953)HALLMARK KRAS SIGNALING UP	0.0	1.0	0.0	1.0	0.0	0.0	1.0	0.0	0.0	1.0	0.0	1.0	0.0	1.0	0.0	0.0	1.0	0.0	0.0	1.0
GRIA1	2890	symbol	H. sapiens	2890	H. sapiens	GRIA1	glutamate ionotropic receptor AMPA type subunit 1	GO:0071242 cellular response to ammonium ion;GO:0060359 response to ammonium ion;GO:0099566 regulation of postsynaptic cytosolic calcium ion concentration		Transporters:Transporter channels and pores; FDA approved drug targets:Small molecule drugs		Glutamic acid; Butabarbital; Lamotrigine; Isoflurane; Ethanol; Methoxyflurane; Desflurane; Sevoflurane; Talampanel; CX717; CX516; Perampanel; Tianeptine; Fluciclovine (18F)	(M62)PID EPHB FWD PATHWAY		0.0	0.0	0.0	0.0	1.0	0.0	0.0	0.0	1.0	1.0	0.0	0.0	0.0	0.0	0.0	0.0	0.0	0.0	0.0	0.0
NNAT	4826	symbol	H. sapiens	4826	H. sapiens	NNAT	neuronatin	GO:0009249 protein lipoylation;GO:0032024 positive regulation of insulin secretion;GO:0090277 positive regulation of peptide hormone secretion							1.0	0.0	0.0	0.0	0.0	0.0	0.0	0.0	0.0	0.0	0.0	0.0	0.0	0.0	0.0	0.0	1.0	0.0	0.0	0.0
SYNE2	23224	symbol	H. sapiens	23224	H. sapiens	SYNE2	spectrin repeat containing nuclear envelope protein 2	GO:0021817 nucleokinesis involved in cell motility in cerebral cortex radial glia guided migration;GO:0031022 nuclear migration along microfilament;GO:0030473 nuclear migration along microtubule		Predicted intracellular proteins; Human disease related genes:Musculoskeletal diseases:Muscular diseases; Disease related genes	Intermediate filaments;Nuclear membrane (Approved)				1.0	1.0	0.0	0.0	0.0	1.0	0.0	0.0	0.0	0.0	0.0	0.0	0.0	0.0	0.0	0.0	0.0	0.0	0.0	0.0
CGA	1081	symbol	H. sapiens	1081	H. sapiens	CGA	glycoprotein hormones, alpha polypeptide	GO:0046884 follicle-stimulating hormone secretion;GO:0032275 luteinizing hormone secretion;GO:0032274 gonadotropin secretion		Predicted secreted proteins; Cancer-related genes:Candidate cancer biomarkers			(M115)PID REG GR PATHWAY		0.0	1.0	0.0	0.0	0.0	0.0	0.0	1.0	0.0	0.0	0.0	0.0	0.0	0.0	0.0	0.0	0.0	0.0	0.0	0.0
TP53	7157	symbol	H. sapiens	7157	H. sapiens	TP53	tumor protein p53	GO:1903451 negative regulation of G1 to G0 transition;GO:1905856 negative regulation of pentose-phosphate shunt;GO:1990248 regulation of transcription from RNA polymerase II promoter in response to DNA damage		Human disease related genes:Cardiovascular diseases:Hematologic diseases; Human disease related genes:Cancers:Cancers of the breast and female genital organs; Human disease related genes:Musculoskeletal diseases:Skeletal diseases; Disease related genes; Transporters:Transporter channels and pores; Predicted intracellular proteins; Human disease related genes:Cancers:Head and neck cancers; Cancer-…	Nucleoplasm (Supported); Additional: Cytosol;Mitochondria	Acetylsalicylic acid; Zinc; Triethyl phosphate; AZD 3355; 1-(9-ethyl-9H-carbazol-3-yl)-N-methylmethanamine; Zinc acetate; Zinc chloride; Zinc sulfate, unspecified form	(M1529)SA G1 AND S PHASES; (M180)PID HIF1A PATHWAY; (M32)PID HDAC CLASSIII PATHWAY	(M5895)HALLMARK WNT BETA CATENIN SIGNALING; (M5898)HALLMARK DNA REPAIR; (M5925)HALLMARK E2F TARGETS	1.0	1.0	1.0	1.0	1.0	1.0	0.0	1.0	0.0	1.0	0.0	1.0	1.0	0.0	0.0	1.0	0.0	1.0	1.0	0.0
TUFT1	7286	symbol	H. sapiens	7286	H. sapiens	TUFT1	tuftelin 1	GO:0030282 bone mineralization;GO:0031214 biomineral tissue development;GO:0110148 biomineralization		Predicted secreted proteins; Predicted intracellular proteins	Vesicles (Approved)				0.0	0.0	0.0	0.0	0.0	0.0	0.0	0.0	0.0	0.0	0.0	0.0	1.0	0.0	0.0	0.0	0.0	0.0	0.0	0.0
ADCY4	196883	symbol	H. sapiens	196883	H. sapiens	ADCY4	adenylate cyclase 4	GO:0006171 cAMP biosynthetic process;GO:0009190 cyclic nucleotide biosynthetic process;GO:0046058 cAMP metabolic process		Enzymes; ENZYME proteins:Lyases; Predicted intracellular proteins			(M56)PID LPA4 PATHWAY; (M8)PID ENDOTHELIN PATHWAY; (M15)PID LYSOPHOSPHOLIPID PATHWAY		0.0	0.0	0.0	1.0	0.0	0.0	0.0	0.0	0.0	0.0	0.0	0.0	0.0	1.0	0.0	0.0	0.0	0.0	1.0	0.0
MSX2	4488	symbol	H. sapiens	4488	H. sapiens	MSX2	msh homeobox 2	GO:0060364 frontal suture morphogenesis;GO:2001055 positive regulation of mesenchymal cell apoptotic process;GO:0035880 embryonic nail plate morphogenesis		Transcription factors:Helix-turn-helix domains; Human disease related genes:Congenital malformations:Congenital malformations of the musculoskeletal system; Human disease related genes:Congenital malformations:Other congenital malformations; Disease related genes; Predicted intracellular proteins	Nuclear speckles (Supported)				0.0	1.0	0.0	1.0	0.0	1.0	1.0	1.0	0.0	0.0	0.0	1.0	1.0	0.0	0.0	0.0	0.0	0.0	1.0	0.0
EDN2	1907	symbol	H. sapiens	1907	H. sapiens	EDN2	endothelin 2	GO:0003058 hormonal regulation of the force of heart contraction;GO:0009932 cell tip growth;GO:0003099 positive regulation of the force of heart contraction by chemical signal		Predicted secreted proteins	Cytosol (Approved)		(M8)PID ENDOTHELIN PATHWAY; (M145)PID P53 DOWNSTREAM PATHWAY	(M5891)HALLMARK HYPOXIA; (M5956)HALLMARK KRAS SIGNALING DN	0.0	1.0	0.0	0.0	0.0	0.0	1.0	1.0	0.0	0.0	0.0	0.0	0.0	0.0	0.0	0.0	0.0	1.0	0.0	0.0
PPP2R2B	5521	symbol	H. sapiens	5521	H. sapiens	PPP2R2B	protein phosphatase 2 regulatory subunit Bbeta	GO:0070262 peptidyl-serine dephosphorylation;GO:0006470 protein dephosphorylation;GO:0016311 dephosphorylation		Predicted intracellular proteins; Human disease related genes:Nervous system diseases:Neurodegenerative diseases; Disease related genes	Cytosol (Uncertain)		(M46)PID ATR PATHWAY; (M186)PID PDGFRB PATHWAY		0.0	1.0	0.0	1.0	0.0	0.0	0.0	0.0	0.0	0.0	0.0	0.0	0.0	0.0	0.0	0.0	0.0	0.0	0.0	0.0
XKR5	389610	symbol	H. sapiens	389610	H. sapiens	XKR5	XK related 5	GO:0070782 phosphatidylserine exposure on apoptotic cell surface;GO:0043652 engulfment of apoptotic cell;GO:0017121 plasma membrane phospholipid scrambling		Transporters:Electrochemical Potential-driven transporters					0.0	0.0	0.0	0.0	0.0	0.0	0.0	0.0	0.0	0.0	0.0	0.0	0.0	0.0	0.0	0.0	0.0	0.0	0.0	0.0
MAP3K5	4217	symbol	H. sapiens	4217	H. sapiens	MAP3K5	mitogen-activated protein kinase kinase kinase 5	GO:0072577 endothelial cell apoptotic process;GO:0038066 p38MAPK cascade;GO:0010663 positive regulation of striated muscle cell apoptotic process	STE Ser/Thr protein kinase family	Enzymes; Kinases:STE Ser/Thr protein kinases; Predicted intracellular proteins; ENZYME proteins:Transferases	Cytosol (Supported)		(M20)PID P38 MKK3 6PATHWAY; (M197)PID HIV NEF PATHWAY; (M249)PID PI3KCI AKT PATHWAY		0.0	1.0	1.0	0.0	1.0	0.0	0.0	0.0	1.0	1.0	0.0	0.0	1.0	0.0	0.0	0.0	0.0	1.0	1.0	0.0
CD70	970	symbol	H. sapiens	970	H. sapiens	CD70	CD70 molecule	GO:0002456 T cell mediated immunity;GO:0042100 B cell proliferation;GO:0033209 tumor necrosis factor-mediated signaling pathway		Cancer-related genes:Mutated cancer genes; CD markers; Cancer-related genes:Candidate cancer biomarkers; Disease related genes; Predicted intracellular proteins	Nucleoplasm (Uncertain)			(M5932)HALLMARK INFLAMMATORY RESPONSE	0.0	1.0	0.0	0.0	0.0	0.0	0.0	0.0	0.0	0.0	0.0	0.0	0.0	0.0	0.0	0.0	0.0	1.0	0.0	0.0
ITGA3	3675	symbol	H. sapiens	3675	H. sapiens	ITGA3	integrin subunit alpha 3	GO:0097062 dendritic spine maintenance;GO:0097205 renal filtration;GO:0035024 negative regulation of Rho protein signal transduction		CD markers; Cancer-related genes:Candidate cancer biomarkers; Human disease related genes:Congenital malformations:Other congenital malformations; Disease related genes; Predicted intracellular proteins	Plasma membrane (Supported)		(M47)PID INTEGRIN CS PATHWAY; (M69)PID REELIN PATHWAY; (M196)PID IL23 PATHWAY	(M5915)HALLMARK APICAL JUNCTION	0.0	1.0	1.0	1.0	1.0	1.0	0.0	0.0	0.0	0.0	0.0	1.0	0.0	1.0	1.0	0.0	1.0	0.0	1.0	1.0
SOX11	6664	symbol	H. sapiens	6664	H. sapiens	SOX11	SRY-box transcription factor 11	GO:2001109 regulation of lens epithelial cell proliferation;GO:2001111 positive regulation of lens epithelial cell proliferation;GO:0061386 closure of optic fissure		Human disease related genes:Other diseases:Mental and behavioural disorders; Human disease related genes:Congenital malformations:Other congenital malformations; Disease related genes; Transcription factors:Other all-alpha-helical DNA-binding domains; Predicted intracellular proteins	Nucleoplasm (Supported); Additional: Plasma membrane				0.0	1.0	0.0	0.0	0.0	1.0	1.0	0.0	0.0	0.0	0.0	0.0	1.0	0.0	0.0	1.0	0.0	0.0	0.0	0.0
ZDHHC8P1	150244	symbol	H. sapiens	150244	H. sapiens	ZDHHC8P1	ZDHHC8 pseudogene 1								0.0	0.0	0.0	0.0	0.0	0.0	0.0	0.0	0.0	0.0	0.0	0.0	0.0	0.0	0.0	0.0	0.0	0.0	0.0	0.0
HS6ST1	9394	symbol	H. sapiens	9394	H. sapiens	HS6ST1	heparan sulfate 6-O-sulfotransferase 1	GO:0015015 heparan sulfate proteoglycan biosynthetic process, enzymatic modification;GO:0060716 labyrinthine layer blood vessel development;GO:0015012 heparan sulfate proteoglycan biosynthetic process		Human disease related genes:Endocrine and metabolic diseases:Hypothalamus and pituitary gland diseases; Predicted intracellular proteins; Disease related genes	Nucleoplasm (Approved)				0.0	1.0	0.0	0.0	0.0	0.0	1.0	0.0	0.0	0.0	0.0	0.0	0.0	0.0	0.0	1.0	0.0	0.0	0.0	0.0
CCNJL	79616	symbol	H. sapiens	79616	H. sapiens	CCNJL	cyclin J like	GO:0000079 regulation of cyclin-dependent protein serine/threonine kinase activity;GO:1904029 regulation of cyclin-dependent protein kinase activity;GO:0044772 mitotic cell cycle phase transition		Predicted intracellular proteins	Nuclear speckles (Approved)				0.0	0.0	1.0	0.0	0.0	0.0	0.0	0.0	0.0	0.0	0.0	0.0	0.0	0.0	0.0	0.0	0.0	0.0	0.0	0.0
MAB21L2	10586	symbol	H. sapiens	10586	H. sapiens	MAB21L2	mab-21 like 2	GO:0010172 embryonic body morphogenesis;GO:0010171 body morphogenesis;GO:0043010 camera-type eye development		Human disease related genes:Congenital malformations:Congenital malformations of eye; Predicted intracellular proteins; Disease related genes	Nucleoplasm (Enhanced)				0.0	1.0	0.0	0.0	0.0	0.0	0.0	0.0	0.0	0.0	0.0	0.0	0.0	0.0	0.0	0.0	0.0	0.0	0.0	0.0
RFXANK	8625	symbol	H. sapiens	8625	H. sapiens	RFXANK	regulatory factor X associated ankyrin containing protein	GO:0007265 Ras protein signal transduction;GO:0007264 small GTPase mediated signal transduction;GO:0045944 positive regulation of transcription by RNA polymerase II		Human disease related genes:Immune system diseases:Primary immunodeficiency; Predicted intracellular proteins; Transcription factors:Yet undefined DNA-binding domains; Disease related genes	Nucleoplasm (Enhanced)		(M30)PID HDAC CLASSII PATHWAY		0.0	0.0	0.0	0.0	0.0	0.0	0.0	0.0	0.0	0.0	0.0	0.0	0.0	0.0	0.0	0.0	0.0	0.0	0.0	0.0
ZSCAN18	65982	symbol	H. sapiens	65982	H. sapiens	ZSCAN18	zinc finger and SCAN domain containing 18	GO:0006357 regulation of transcription by RNA polymerase II;GO:0006355 regulation of transcription, DNA-templated;GO:1903506 regulation of nucleic acid-templated transcription		Predicted intracellular proteins	Nucleoplasm (Approved)				0.0	0.0	0.0	0.0	0.0	0.0	0.0	0.0	0.0	0.0	0.0	0.0	0.0	0.0	0.0	0.0	0.0	0.0	0.0	0.0
WNT5A	7474	symbol	H. sapiens	7474	H. sapiens	WNT5A	Wnt family member 5A	GO:0036517 chemoattraction of serotonergic neuron axon;GO:0061341 non-canonical Wnt signaling pathway involved in heart development;GO:0061346 planar cell polarity pathway involved in heart morphogenesis		Human disease related genes:Congenital malformations:Other congenital malformations; Predicted secreted proteins; Disease related genes			(M77)PID WNT SIGNALING PATHWAY; (M23)PID WNT NONCANONICAL PATHWAY; (M254)PID MYC REPRESS PATHWAY	(M5903)HALLMARK NOTCH SIGNALING; (M5930)HALLMARK EPITHELIAL MESENCHYMAL TRANSITION	1.0	1.0	1.0	1.0	1.0	1.0	1.0	1.0	1.0	1.0	1.0	1.0	0.0	0.0	1.0	1.0	1.0	1.0	1.0	1.0
ST6GAL2	84620	symbol	H. sapiens	84620	H. sapiens	ST6GAL2	ST6 beta-galactoside alpha-2,6-sialyltransferase 2	GO:0097503 sialylation;GO:0009311 oligosaccharide metabolic process;GO:0006486 protein glycosylation		Enzymes; Predicted intracellular proteins; ENZYME proteins:Transferases	Nucleoli fibrillar center (Approved); Additional: Nucleoplasm				0.0	0.0	0.0	0.0	0.0	0.0	0.0	0.0	0.0	0.0	0.0	0.0	0.0	0.0	0.0	0.0	0.0	0.0	0.0	0.0
ARSJ	79642	symbol	H. sapiens	79642	H. sapiens	ARSJ	arylsulfatase family member J			Predicted secreted proteins; Predicted intracellular proteins	Actin filaments (Enhanced)				0.0	0.0	0.0	0.0	0.0	0.0	0.0	0.0	0.0	0.0	0.0	0.0	0.0	0.0	0.0	0.0	0.0	0.0	0.0	0.0
TGFB2	7042	symbol	H. sapiens	7042	H. sapiens	TGFB2	transforming growth factor beta 2	GO:1903701 substantia propria of cornea development;GO:0042704 uterine wall breakdown;GO:0062044 negative regulation of cardiac epithelial to mesenchymal transition		Human disease related genes:Immune system diseases:Allergies and autoimmune diseases; Cancer-related genes:Candidate cancer biomarkers; Human disease related genes:Congenital malformations:Congenital malformations of the circulatory system; Predicted secreted proteins; Disease related genes	Vesicles (Approved)		(M11736)SA MMP CYTOKINE CONNECTION; (M211)PID HEDGEHOG 2PATHWAY; (M33)PID GLYPICAN 1PATHWAY	(M5902)HALLMARK APOPTOSIS; (M5934)HALLMARK XENOBIOTIC METABOLISM; (M5950)HALLMARK ALLOGRAFT REJECTION	0.0	1.0	1.0	1.0	0.0	1.0	1.0	1.0	0.0	1.0	0.0	1.0	1.0	1.0	0.0	1.0	1.0	0.0	1.0	1.0
LIMD1	8994	symbol	H. sapiens	8994	H. sapiens	LIMD1	LIM domain containing 1	GO:0035331 negative regulation of hippo signaling;GO:0033962 P-body assembly;GO:0002076 osteoblast development		Predicted intracellular proteins	Focal adhesion sites;Nucleoplasm (Supported)				0.0	1.0	1.0	0.0	0.0	1.0	0.0	0.0	0.0	0.0	0.0	0.0	1.0	0.0	0.0	0.0	0.0	0.0	0.0	0.0
ATP6V0E2	155066	symbol	H. sapiens	155066	H. sapiens	ATP6V0E2	ATPase H+ transporting V0 subunit e2	GO:0007035 vacuolar acidification;GO:0051452 intracellular pH reduction;GO:0045851 pH reduction							0.0	0.0	0.0	1.0	0.0	0.0	0.0	0.0	0.0	0.0	0.0	1.0	0.0	0.0	0.0	0.0	0.0	0.0	1.0	0.0
PLCH2	9651	symbol	H. sapiens	9651	H. sapiens	PLCH2	phospholipase C eta 2	GO:0048015 phosphatidylinositol-mediated signaling;GO:0048017 inositol lipid-mediated signaling;GO:0046488 phosphatidylinositol metabolic process		Enzymes; ENZYME proteins:Hydrolases; Predicted intracellular proteins					0.0	0.0	0.0	0.0	0.0	0.0	0.0	0.0	0.0	0.0	0.0	0.0	0.0	0.0	0.0	0.0	0.0	0.0	0.0	0.0
ST3GAL5	8869	symbol	H. sapiens	8869	H. sapiens	ST3GAL5	ST3 beta-galactoside alpha-2,3-sialyltransferase 5	GO:0001574 ganglioside biosynthetic process;GO:0097503 sialylation;GO:0001573 ganglioside metabolic process		Human disease related genes:Nervous system diseases:Epilepsy; ENZYME proteins:Transferases; Disease related genes; Potential drug targets; Enzymes; Predicted intracellular proteins; Human disease related genes:Congenital disorders of metabolism:Congenital disorders of glycan/glycoprotein metabolism	Vesicles (Approved)	99mTc-14 F7 Mab		(M5913)HALLMARK INTERFERON GAMMA RESPONSE	0.0	0.0	0.0	0.0	0.0	0.0	0.0	0.0	0.0	0.0	0.0	0.0	0.0	0.0	0.0	0.0	0.0	0.0	0.0	0.0
ZNF853	54753	symbol	H. sapiens	54753	H. sapiens	ZNF853	zinc finger protein 853	GO:0006357 regulation of transcription by RNA polymerase II;GO:0006355 regulation of transcription, DNA-templated;GO:1903506 regulation of nucleic acid-templated transcription		Predicted intracellular proteins; Transcription factors:Zinc-coordinating DNA-binding domains	Nucleoli (Approved)				0.0	0.0	0.0	0.0	0.0	0.0	0.0	0.0	0.0	0.0	0.0	0.0	0.0	0.0	0.0	0.0	0.0	0.0	0.0	0.0
BIN1	274	symbol	H. sapiens	274	H. sapiens	BIN1	bridging integrator 1	GO:0106135 negative regulation of cardiac muscle cell contraction;GO:1903946 negative regulation of ventricular cardiac muscle cell action potential;GO:0060988 lipid tube assembly		Predicted intracellular proteins; Human disease related genes:Musculoskeletal diseases:Muscular diseases; Disease related genes	Cytosol (Supported)		(M67)PID ARF6 TRAFFICKING PATHWAY; (M19)PID P73PATHWAY	(M5893)HALLMARK MITOTIC SPINDLE; (M5909)HALLMARK MYOGENESIS	0.0	1.0	0.0	0.0	0.0	1.0	0.0	0.0	0.0	0.0	0.0	0.0	0.0	0.0	0.0	0.0	0.0	0.0	0.0	0.0
ERMN	57471	symbol	H. sapiens	57471	H. sapiens	ERMN	ermin	GO:0008360 regulation of cell shape;GO:0001763 morphogenesis of a branching structure;GO:0007015 actin filament organization		Predicted intracellular proteins	Plasma membrane (Approved); Additional: Cytosol				0.0	1.0	0.0	0.0	0.0	1.0	0.0	0.0	0.0	0.0	0.0	0.0	0.0	0.0	0.0	0.0	0.0	0.0	0.0	0.0
PTPRQ	374462	symbol	H. sapiens	374462	H. sapiens	PTPRQ	protein tyrosine phosphatase receptor type Q	GO:1990264 peptidyl-tyrosine dephosphorylation involved in inactivation of protein kinase activity;GO:0035335 peptidyl-tyrosine dephosphorylation;GO:0045598 regulation of fat cell differentiation		Human disease related genes:Nervous system diseases:Ear disease; Predicted intracellular proteins	Cytosol (Approved)				0.0	0.0	1.0	0.0	0.0	0.0	0.0	0.0	0.0	0.0	0.0	0.0	0.0	0.0	0.0	0.0	0.0	0.0	0.0	0.0
ZNF518B	85460	symbol	H. sapiens	85460	H. sapiens	ZNF518B	zinc finger protein 518B	GO:0006325 chromatin organization;GO:0051276 chromosome organization;GO:0006357 regulation of transcription by RNA polymerase II		Predicted intracellular proteins; Transcription factors:Zinc-coordinating DNA-binding domains	Nucleoplasm (Approved)				0.0	0.0	0.0	0.0	0.0	0.0	0.0	0.0	0.0	0.0	0.0	0.0	0.0	0.0	0.0	0.0	0.0	0.0	0.0	0.0
ALX3	257	symbol	H. sapiens	257	H. sapiens	ALX3	ALX homeobox 3	GO:0035116 embryonic hindlimb morphogenesis;GO:0035115 embryonic forelimb morphogenesis;GO:0035137 hindlimb morphogenesis		Human disease related genes:Congenital malformations:Congenital malformations of the musculoskeletal system; Transcription factors:Helix-turn-helix domains; Predicted intracellular proteins; Disease related genes	Nucleoli fibrillar center (Approved)				0.0	1.0	0.0	0.0	0.0	0.0	0.0	0.0	0.0	0.0	0.0	0.0	1.0	0.0	0.0	0.0	0.0	0.0	0.0	0.0
SHROOM2	357	symbol	H. sapiens	357	H. sapiens	SHROOM2	shroom family member 2	GO:0008057 eye pigment granule organization;GO:0043476 pigment accumulation;GO:0043482 cellular pigment accumulation		Predicted intracellular proteins	Cell Junctions;Plasma membrane (Approved); Additional: Cytosol			(M5916)HALLMARK APICAL SURFACE; (M5893)HALLMARK MITOTIC SPINDLE; (M5915)HALLMARK APICAL JUNCTION	1.0	1.0	0.0	0.0	0.0	0.0	0.0	0.0	0.0	0.0	0.0	0.0	0.0	0.0	0.0	0.0	0.0	0.0	0.0	0.0
TEAD2	8463	symbol	H. sapiens	8463	H. sapiens	TEAD2	TEA domain transcription factor 2	GO:0048368 lateral mesoderm development;GO:0048339 paraxial mesoderm development;GO:0030903 notochord development		Transcription factors:Helix-turn-helix domains; Predicted intracellular proteins	Nucleoplasm (Supported)				0.0	1.0	1.0	0.0	0.0	0.0	1.0	0.0	0.0	0.0	0.0	0.0	0.0	0.0	1.0	1.0	0.0	0.0	0.0	0.0
PATZ1	23598	symbol	H. sapiens	23598	H. sapiens	PATZ1	POZ/BTB and AT hook containing zinc finger 1	GO:0010596 negative regulation of endothelial cell migration;GO:0010633 negative regulation of epithelial cell migration;GO:0008584 male gonad development		Transcription factors:Zinc-coordinating DNA-binding domains; Predicted intracellular proteins; Cancer-related genes; Disease related genes	Nucleoplasm (Supported)		(M58)PID AR PATHWAY		0.0	1.0	0.0	0.0	0.0	0.0	0.0	0.0	0.0	0.0	0.0	0.0	0.0	0.0	0.0	1.0	0.0	1.0	0.0	0.0
HAAO	23498	symbol	H. sapiens	23498	H. sapiens	HAAO	3-hydroxyanthranilate 3,4-dioxygenase	GO:0019805 quinolinate biosynthetic process;GO:0043420 anthranilate metabolic process;GO:0046874 quinolinate metabolic process		ENZYME proteins:Oxidoreductases; Human disease related genes:Congenital disorders of metabolism:Congenital disorders of amino acid metabolism; Disease related genes; Potential drug targets; Enzymes; Predicted intracellular proteins					0.0	0.0	0.0	0.0	0.0	0.0	0.0	0.0	1.0	0.0	0.0	0.0	0.0	0.0	0.0	0.0	0.0	0.0	0.0	0.0
BCAM	4059	symbol	H. sapiens	4059	H. sapiens	BCAM	basal cell adhesion molecule (Lutheran blood group)	GO:0007160 cell-matrix adhesion;GO:0031589 cell-substrate adhesion;GO:0007155 cell adhesion		Blood group antigen proteins; Predicted intracellular proteins; CD markers	Nucleoli fibrillar center (Approved)			(M5898)HALLMARK DNA REPAIR; (M5945)HALLMARK HEME METABOLISM	0.0	0.0	0.0	0.0	0.0	0.0	0.0	0.0	0.0	0.0	0.0	0.0	0.0	0.0	0.0	0.0	0.0	0.0	0.0	0.0
ZNRF1	84937	symbol	H. sapiens	84937	H. sapiens	ZNRF1	zinc and ring finger 1	GO:0070936 protein K48-linked ubiquitination;GO:0000209 protein polyubiquitination;GO:0043161 proteasome-mediated ubiquitin-dependent protein catabolic process		Enzymes; Predicted intracellular proteins; ENZYME proteins:Transferases					0.0	0.0	0.0	0.0	0.0	0.0	0.0	0.0	0.0	0.0	0.0	0.0	0.0	0.0	0.0	0.0	0.0	0.0	0.0	0.0
ELMSAN1	91748	gene_synonym	H. sapiens	91748	H. sapiens	MIDEAS	mitotic deacetylase associated SANT domain protein	GO:0016575 histone deacetylation;GO:0006476 protein deacetylation;GO:0035601 protein deacylation		Transcription factors:Helix-turn-helix domains; Predicted intracellular proteins	Nucleoplasm (Enhanced)				0.0	0.0	0.0	0.0	0.0	0.0	0.0	0.0	0.0	0.0	0.0	0.0	0.0	0.0	0.0	0.0	0.0	0.0	0.0	0.0
G6PD	2539	symbol	H. sapiens	2539	H. sapiens	G6PD	glucose-6-phosphate dehydrogenase	GO:0010732 regulation of protein glutathionylation;GO:0010734 negative regulation of protein glutathionylation;GO:0019322 pentose biosynthetic process		Human disease related genes:Immune system diseases:Primary immunodeficiency; ENZYME proteins:Oxidoreductases; Cancer-related genes:Candidate cancer biomarkers; Human disease related genes:Cardiovascular diseases:Hematologic diseases; Human disease related genes:Congenital disorders of metabolism:Congenital disorders of amino acid metabolism; Disease related genes; Potential drug targets; Enzymes;…	Cytosol (Enhanced); Additional: Centriolar satellite	Glycolic acid; Nicotinamide adenine dinucleotide phosphate; 16-Bromoepiandrosterone; Artenimol		(M5938)HALLMARK REACTIVE OXYGEN SPECIES PATHWAY; (M5924)HALLMARK MTORC1 SIGNALING; (M5937)HALLMARK GLYCOLYSIS	1.0	0.0	0.0	0.0	0.0	1.0	0.0	0.0	1.0	1.0	0.0	0.0	0.0	0.0	0.0	1.0	0.0	0.0	1.0	0.0
KISS1	3814	symbol	H. sapiens	3814	H. sapiens	KISS1	KiSS-1 metastasis suppressor	GO:0060112 generation of ovulation cycle rhythm;GO:0033686 positive regulation of luteinizing hormone secretion;GO:0033684 regulation of luteinizing hormone secretion		Human disease related genes:Endocrine and metabolic diseases:Hypothalamus and pituitary gland diseases; Predicted secreted proteins; Disease related genes; Cancer-related genes:Candidate cancer biomarkers	Vesicles (Approved)				0.0	0.0	1.0	0.0	0.0	0.0	0.0	0.0	0.0	0.0	0.0	0.0	0.0	0.0	0.0	0.0	0.0	0.0	0.0	0.0
FAM96B	51647	gene_synonym	H. sapiens	51647	H. sapiens	CIAO2B	cytosolic iron-sulfur assembly component 2B	GO:0106035 protein maturation by [4Fe-4S] cluster transfer;GO:0097428 protein maturation by iron-sulfur cluster transfer;GO:0016226 iron-sulfur cluster assembly		Predicted intracellular proteins	Cytosol;Nucleoplasm (Supported)				0.0	0.0	0.0	0.0	0.0	0.0	0.0	0.0	0.0	0.0	0.0	0.0	0.0	0.0	0.0	0.0	0.0	0.0	0.0	0.0
GALNT3	2591	symbol	H. sapiens	2591	H. sapiens	GALNT3	polypeptide N-acetylgalactosaminyltransferase 3	GO:0018243 protein O-linked glycosylation via threonine;GO:0018242 protein O-linked glycosylation via serine;GO:0016266 O-glycan processing		Disease related genes; Potential drug targets; Enzymes; Predicted intracellular proteins; ENZYME proteins:Transferases; Human disease related genes:Congenital disorders of metabolism:Other congenital disorders of metabolism	Golgi apparatus (Supported)			(M5953)HALLMARK KRAS SIGNALING UP	0.0	0.0	0.0	0.0	0.0	0.0	0.0	0.0	0.0	0.0	0.0	1.0	0.0	0.0	0.0	0.0	0.0	0.0	0.0	0.0
ALS2	57679	symbol	H. sapiens	57679	H. sapiens	ALS2	alsin Rho guanine nucleotide exchange factor ALS2	GO:0051036 regulation of endosome size;GO:0035022 positive regulation of Rac protein signal transduction;GO:0097494 regulation of vesicle size		Predicted intracellular proteins; Human disease related genes:Nervous system diseases:Neurodegenerative diseases; Disease related genes	Cytosol;Intermediate filaments (Approved)			(M5893)HALLMARK MITOTIC SPINDLE	0.0	1.0	1.0	0.0	1.0	0.0	0.0	1.0	0.0	0.0	0.0	0.0	0.0	0.0	0.0	0.0	0.0	0.0	1.0	0.0
CASS4	57091	symbol	H. sapiens	57091	H. sapiens	CASS4	Cas scaffold protein family member 4	GO:0090527 actin filament reorganization;GO:1900026 positive regulation of substrate adhesion-dependent cell spreading;GO:0061098 positive regulation of protein tyrosine kinase activity		Predicted intracellular proteins					0.0	1.0	1.0	0.0	0.0	1.0	0.0	0.0	0.0	0.0	0.0	1.0	0.0	0.0	0.0	0.0	0.0	0.0	0.0	0.0
SOX6	55553	symbol	H. sapiens	55553	H. sapiens	SOX6	SRY-box transcription factor 6	GO:2000741 positive regulation of mesenchymal stem cell differentiation;GO:0021529 spinal cord oligodendrocyte cell differentiation;GO:2000739 regulation of mesenchymal stem cell differentiation		Transcription factors:Other all-alpha-helical DNA-binding domains; Predicted intracellular proteins	Nucleoplasm (Supported)				1.0	1.0	0.0	1.0	0.0	1.0	0.0	0.0	0.0	0.0	0.0	1.0	0.0	0.0	0.0	1.0	0.0	0.0	1.0	0.0
NACAD	23148	symbol	H. sapiens	23148	H. sapiens	NACAD	NAC alpha domain containing	GO:0006612 protein targeting to membrane;GO:0090150 establishment of protein localization to membrane;GO:0006605 protein targeting		Predicted intracellular proteins	Cytosol (Approved); Additional: Nucleoplasm				0.0	0.0	0.0	0.0	0.0	0.0	0.0	0.0	0.0	0.0	0.0	0.0	0.0	0.0	0.0	0.0	0.0	0.0	0.0	0.0
FAM120C	54954	symbol	H. sapiens	54954	H. sapiens	FAM120C	family with sequence similarity 120C			Predicted intracellular proteins	Nuclear speckles (Approved)				0.0	0.0	0.0	0.0	0.0	0.0	0.0	0.0	0.0	0.0	0.0	0.0	0.0	0.0	0.0	0.0	0.0	0.0	0.0	0.0
PDE6B	5158	symbol	H. sapiens	5158	H. sapiens	PDE6B	phosphodiesterase 6B	GO:1990009 retinal cell apoptotic process;GO:0007603 phototransduction, visible light;GO:0043153 entrainment of circadian clock by photoperiod		ENZYME proteins:Hydrolases; Human disease related genes:Nervous system diseases:Eye disease; Disease related genes; Enzymes; Predicted intracellular proteins	Cytosol (Approved)		(M204)PID RHODOPSIN PATHWAY	(M5956)HALLMARK KRAS SIGNALING DN	0.0	1.0	0.0	1.0	0.0	0.0	0.0	0.0	0.0	0.0	0.0	0.0	0.0	0.0	0.0	0.0	0.0	0.0	0.0	1.0
PRSS12	8492	symbol	H. sapiens	8492	H. sapiens	PRSS12	serine protease 12	GO:0031638 zymogen activation;GO:0016485 protein processing;GO:0006887 exocytosis		Human disease related genes:Other diseases:Mental and behavioural disorders; Predicted secreted proteins; Disease related genes; Potential drug targets; Enzymes; Peptidases:Serine-type peptidases	Actin filaments (Approved); Additional: Nucleoplasm		(M3468)NABA ECM REGULATORS; (M5885)NABA MATRISOME ASSOCIATED; (M5889)NABA MATRISOME		0.0	0.0	0.0	0.0	0.0	0.0	0.0	0.0	0.0	0.0	0.0	0.0	0.0	0.0	0.0	0.0	0.0	0.0	0.0	0.0
TOM1L2	146691	symbol	H. sapiens	146691	H. sapiens	TOM1L2	target of myb1 like 2 membrane trafficking protein	GO:0045839 negative regulation of mitotic nuclear division;GO:0051784 negative regulation of nuclear division;GO:0007088 regulation of mitotic nuclear division		Predicted intracellular proteins	Intermediate filaments (Approved); Additional: Golgi apparatus				0.0	1.0	0.0	0.0	0.0	0.0	0.0	0.0	0.0	0.0	0.0	0.0	1.0	0.0	0.0	0.0	0.0	0.0	0.0	0.0
MRPS24	64951	symbol	H. sapiens	64951	H. sapiens	MRPS24	mitochondrial ribosomal protein S24	GO:0032543 mitochondrial translation;GO:0140053 mitochondrial gene expression;GO:0006412 translation		Ribosomal proteins; Predicted intracellular proteins					0.0	0.0	0.0	0.0	0.0	0.0	0.0	0.0	0.0	0.0	0.0	0.0	0.0	0.0	0.0	0.0	0.0	0.0	0.0	0.0
SERPINB9	5272	symbol	H. sapiens	5272	H. sapiens	SERPINB9	serpin family B member 9	GO:0042270 protection from natural killer cell mediated cytotoxicity;GO:0071391 cellular response to estrogen stimulus;GO:0045953 negative regulation of natural killer cell mediated cytotoxicity		Predicted intracellular proteins	Nucleoplasm (Approved); Additional: Cytosol	Raloxifene	(M3468)NABA ECM REGULATORS; (M5885)NABA MATRISOME ASSOCIATED; (M5889)NABA MATRISOME		0.0	0.0	0.0	0.0	0.0	0.0	0.0	0.0	0.0	0.0	0.0	0.0	0.0	0.0	0.0	0.0	0.0	0.0	0.0	0.0
UBL4B	164153	symbol	H. sapiens	164153	H. sapiens	UBL4B	ubiquitin like 4B	GO:1903955 positive regulation of protein targeting to mitochondrion;GO:1903749 positive regulation of establishment of protein localization to mitochondrion;GO:1903214 regulation of protein targeting to mitochondrion		Predicted intracellular proteins					0.0	0.0	0.0	0.0	0.0	0.0	0.0	0.0	0.0	0.0	0.0	0.0	0.0	0.0	0.0	0.0	1.0	0.0	0.0	0.0
MAP3K9	4293	symbol	H. sapiens	4293	H. sapiens	MAP3K9	mitogen-activated protein kinase kinase kinase 9	GO:0000165 MAPK cascade;GO:0046777 protein autophosphorylation;GO:0043065 positive regulation of apoptotic process	STE Ser/Thr protein kinase family	Disease related genes; Potential drug targets; Enzymes; Kinases:STE Ser/Thr protein kinases; Predicted intracellular proteins; ENZYME proteins:Transferases	Nucleoli;Nucleoplasm (Approved)	12-(2-hydroxyethyl)-2-(1-methylethoxy)-13,14-dihydronaphtho[2,1-a]pyrrolo[3,4-c]carbazol-5(12H)-one; Fostamatinib			0.0	1.0	1.0	0.0	0.0	0.0	0.0	0.0	0.0	0.0	0.0	0.0	0.0	0.0	0.0	0.0	0.0	0.0	0.0	0.0
GPRC5A	9052	symbol	H. sapiens	9052	H. sapiens	GPRC5A	G protein-coupled receptor class C group 5 member A	GO:0007175 negative regulation of epidermal growth factor-activated receptor activity;GO:0042059 negative regulation of epidermal growth factor receptor signaling pathway;GO:0007176 regulation of epidermal growth factor-activated receptor activity		G-protein coupled receptors:GPCRs excl olfactory receptors; G-protein coupled receptors:Family 3 (C) receptors; Predicted intracellular proteins	Plasma membrane;Vesicles (Enhanced)	Tretinoin			0.0	1.0	1.0	0.0	0.0	0.0	0.0	0.0	0.0	0.0	0.0	0.0	0.0	0.0	0.0	0.0	0.0	0.0	0.0	0.0
AXL	558	symbol	H. sapiens	558	H. sapiens	AXL	AXL receptor tyrosine kinase	GO:0097350 neutrophil clearance;GO:0048549 positive regulation of pinocytosis;GO:2000669 negative regulation of dendritic cell apoptotic process	Tyr protein kinase family	FDA approved drug targets:Small molecule drugs; Kinases:Tyr protein kinases; Disease related genes; Enzymes; ENZYME proteins:Transferases	Plasma membrane (Supported); Additional: Actin filaments;Vesicles	Fostamatinib; Gilteritinib	(M236)PID DELTA NP63 PATHWAY	(M5932)HALLMARK INFLAMMATORY RESPONSE	1.0	1.0	1.0	0.0	0.0	0.0	0.0	1.0	1.0	1.0	0.0	1.0	0.0	0.0	0.0	1.0	0.0	1.0	1.0	0.0
CHCHD6	84303	symbol	H. sapiens	84303	H. sapiens	CHCHD6	coiled-coil-helix-coiled-coil-helix domain containing 6	GO:0042407 cristae formation;GO:0007007 inner mitochondrial membrane organization;GO:0007006 mitochondrial membrane organization		Predicted intracellular proteins	Mitochondria (Supported)				0.0	0.0	0.0	0.0	0.0	0.0	0.0	0.0	0.0	0.0	0.0	0.0	0.0	0.0	0.0	0.0	0.0	0.0	0.0	0.0
REPIN1	29803	symbol	H. sapiens	29803	H. sapiens	REPIN1	replication initiator 1	GO:0006260 DNA replication;GO:0034645 cellular macromolecule biosynthetic process;GO:0009059 macromolecule biosynthetic process		Predicted intracellular proteins	Nucleoplasm (Supported)				0.0	0.0	0.0	0.0	0.0	0.0	0.0	0.0	0.0	0.0	0.0	0.0	0.0	0.0	0.0	0.0	0.0	0.0	0.0	0.0
TTC9	23508	symbol	H. sapiens	23508	H. sapiens	TTC9	tetratricopeptide repeat domain 9	GO:0060348 bone development;GO:0001501 skeletal system development;GO:0048513 animal organ development		Predicted intracellular proteins	Nuclear bodies (Approved)				0.0	1.0	0.0	0.0	0.0	0.0	0.0	0.0	0.0	0.0	0.0	0.0	1.0	0.0	0.0	0.0	0.0	0.0	0.0	0.0
ALDH4A1	8659	symbol	H. sapiens	8659	H. sapiens	ALDH4A1	aldehyde dehydrogenase 4 family member A1	GO:0010133 proline catabolic process to glutamate;GO:0006562 proline catabolic process;GO:0019470 4-hydroxyproline catabolic process		ENZYME proteins:Oxidoreductases; Human disease related genes:Congenital disorders of metabolism:Congenital disorders of amino acid metabolism; Disease related genes; Potential drug targets; Enzymes; Predicted intracellular proteins	Mitochondria (Supported)	NADH			0.0	0.0	0.0	0.0	0.0	0.0	0.0	0.0	0.0	0.0	0.0	0.0	0.0	0.0	0.0	0.0	0.0	0.0	0.0	0.0
PPM1L	151742	symbol	H. sapiens	151742	H. sapiens	PPM1L	protein phosphatase, Mg2+/Mn2+ dependent 1L	GO:0030148 sphingolipid biosynthetic process;GO:0046467 membrane lipid biosynthetic process;GO:0006665 sphingolipid metabolic process		Enzymes; ENZYME proteins:Hydrolases; Predicted intracellular proteins	Cytosol (Approved); Additional: Nucleoplasm				0.0	0.0	1.0	0.0	0.0	0.0	0.0	0.0	0.0	0.0	0.0	1.0	0.0	0.0	0.0	0.0	0.0	0.0	1.0	0.0
AGO1	26523	symbol	H. sapiens	26523	H. sapiens	AGO1	argonaute RISC component 1	GO:0035280 miRNA loading onto RISC involved in gene silencing by miRNA;GO:0010501 RNA secondary structure unwinding;GO:0070922 small RNA loading onto RISC		Predicted intracellular proteins	Cytoplasmic bodies (Supported); Additional: Cytosol				0.0	0.0	0.0	1.0	0.0	0.0	1.0	0.0	0.0	0.0	0.0	0.0	0.0	0.0	0.0	0.0	0.0	0.0	1.0	0.0
H2AFY2	55506	gene_synonym	H. sapiens	55506	H. sapiens	MACROH2A2	macroH2A.2 histone	GO:1901837 negative regulation of transcription of nucleolar large rRNA by RNA polymerase I;GO:0016479 negative regulation of transcription by RNA polymerase I;GO:0071169 establishment of protein localization to chromatin		Predicted intracellular proteins	Nucleoplasm (Supported)			(M5956)HALLMARK KRAS SIGNALING DN	1.0	0.0	0.0	1.0	0.0	0.0	0.0	0.0	0.0	0.0	0.0	0.0	1.0	0.0	0.0	0.0	0.0	0.0	0.0	0.0
CACNG4	27092	symbol	H. sapiens	27092	H. sapiens	CACNG4	calcium voltage-gated channel auxiliary subunit gamma 4	GO:0098943 neurotransmitter receptor transport, postsynaptic endosome to lysosome;GO:2000969 positive regulation of AMPA receptor activity;GO:0098953 receptor diffusion trapping		Transporters:Accessory Factors Involved in Transport; FDA approved drug targets:Small molecule drugs	Vesicles (Approved)				0.0	0.0	1.0	0.0	0.0	0.0	0.0	0.0	0.0	0.0	0.0	0.0	0.0	1.0	0.0	0.0	0.0	0.0	0.0	0.0
ELOVL2	54898	symbol	H. sapiens	54898	H. sapiens	ELOVL2	ELOVL fatty acid elongase 2	GO:0019367 fatty acid elongation, saturated fatty acid;GO:0019368 fatty acid elongation, unsaturated fatty acid;GO:0034625 fatty acid elongation, monounsaturated fatty acid		Enzymes; ENZYME proteins:Transferases		alpha-Linolenic acid		(M5906)HALLMARK ESTROGEN RESPONSE EARLY	0.0	0.0	0.0	0.0	0.0	0.0	0.0	0.0	0.0	0.0	0.0	0.0	0.0	0.0	0.0	0.0	0.0	0.0	0.0	0.0
DCAKD	79877	symbol	H. sapiens	79877	H. sapiens	DCAKD	dephospho-CoA kinase domain containing	GO:0015937 coenzyme A biosynthetic process;GO:0015936 coenzyme A metabolic process;GO:0033866 nucleoside bisphosphate biosynthetic process		Predicted intracellular proteins	Nucleoplasm (Approved)				0.0	0.0	0.0	0.0	0.0	0.0	0.0	0.0	0.0	0.0	0.0	0.0	0.0	0.0	0.0	0.0	0.0	0.0	0.0	0.0
SH3BP1	23616	symbol	H. sapiens	23616	H. sapiens	SH3BP1	SH3 domain binding protein 1	GO:0045198 establishment of epithelial cell apical/basal polarity;GO:0035020 regulation of Rac protein signal transduction;GO:0030859 polarized epithelial cell differentiation		Predicted intracellular proteins	Cytosol (Approved)				0.0	1.0	0.0	0.0	0.0	0.0	0.0	0.0	0.0	0.0	1.0	0.0	0.0	0.0	0.0	0.0	0.0	0.0	0.0	0.0
NEDD4L	23327	symbol	H. sapiens	23327	H. sapiens	NEDD4L	NEDD4 like E3 ubiquitin protein ligase	GO:2001288 positive regulation of caveolin-mediated endocytosis;GO:2001286 regulation of caveolin-mediated endocytosis;GO:2000009 negative regulation of protein localization to cell surface		Human disease related genes:Congenital malformations:Congenital malformations of the nervous system; Cancer-related genes:Mutational cancer driver genes; Disease related genes; Potential drug targets; Enzymes; Predicted intracellular proteins; ENZYME proteins:Transferases			(M286)PID TGFBR PATHWAY; (M187)PID TRKR PATHWAY; (M19)PID P73PATHWAY	(M5891)HALLMARK HYPOXIA	0.0	0.0	0.0	0.0	0.0	1.0	0.0	0.0	1.0	0.0	0.0	0.0	0.0	0.0	0.0	0.0	1.0	0.0	0.0	0.0
RAB11FIP1	80223	symbol	H. sapiens	80223	H. sapiens	RAB11FIP1	RAB11 family interacting protein 1	GO:0070164 negative regulation of adiponectin secretion;GO:0070163 regulation of adiponectin secretion;GO:0046888 negative regulation of hormone secretion		Predicted intracellular proteins	Vesicles (Enhanced)				0.0	0.0	0.0	0.0	0.0	0.0	0.0	0.0	0.0	0.0	0.0	0.0	0.0	0.0	0.0	0.0	1.0	0.0	0.0	0.0
SLC25A29	123096	symbol	H. sapiens	123096	H. sapiens	SLC25A29	solute carrier family 25 member 29	GO:1990575 mitochondrial L-ornithine transmembrane transport;GO:0006844 acyl carnitine transport;GO:1903826 L-arginine transmembrane transport		Transporters:Electrochemical Potential-driven transporters; Predicted intracellular proteins		Levocarnitine			0.0	0.0	0.0	0.0	0.0	0.0	0.0	0.0	0.0	0.0	0.0	0.0	0.0	0.0	0.0	0.0	0.0	0.0	0.0	0.0
PEG3	5178	symbol	H. sapiens	5178	H. sapiens	PEG3	paternally expressed 3	GO:0006915 apoptotic process;GO:0012501 programmed cell death;GO:0000122 negative regulation of transcription by RNA polymerase II		Predicted intracellular proteins; Transcription factors:Zinc-coordinating DNA-binding domains	Nucleoplasm (Approved)			(M5953)HALLMARK KRAS SIGNALING UP	0.0	0.0	0.0	0.0	0.0	0.0	0.0	0.0	0.0	0.0	0.0	0.0	0.0	0.0	0.0	0.0	0.0	0.0	0.0	0.0
CPA4	51200	symbol	H. sapiens	51200	H. sapiens	CPA4	carboxypeptidase A4	GO:0016573 histone acetylation;GO:0018393 internal peptidyl-lysine acetylation;GO:0006475 internal protein amino acid acetylation		Enzymes; Predicted secreted proteins; Predicted intracellular proteins; Peptidases:Metallopeptidases	Nucleoplasm (Approved); Additional: Centrosome;Cytosol				0.0	0.0	0.0	0.0	0.0	0.0	0.0	0.0	0.0	0.0	0.0	0.0	0.0	0.0	0.0	0.0	0.0	0.0	0.0	0.0
AFF3	3899	symbol	H. sapiens	3899	H. sapiens	AFF3	AF4/FMR2 family member 3	GO:0035116 embryonic hindlimb morphogenesis;GO:0035137 hindlimb morphogenesis;GO:0030326 embryonic limb morphogenesis		Predicted intracellular proteins; Cancer-related genes	Nucleoplasm (Supported); Additional: Cytosol				0.0	1.0	0.0	0.0	0.0	0.0	0.0	0.0	0.0	0.0	0.0	0.0	0.0	0.0	0.0	0.0	0.0	1.0	0.0	0.0
ARNT2	9915	symbol	H. sapiens	9915	H. sapiens	ARNT2	aryl hydrocarbon receptor nuclear translocator 2	GO:0001666 response to hypoxia;GO:0036293 response to decreased oxygen levels;GO:0070482 response to oxygen levels		Human disease related genes:Congenital malformations:Other congenital malformations; Transcription factors:Basic domains; Predicted intracellular proteins; Disease related genes	Nucleoplasm (Supported)				1.0	1.0	0.0	1.0	0.0	0.0	0.0	0.0	0.0	0.0	0.0	0.0	0.0	0.0	0.0	0.0	0.0	0.0	0.0	0.0
IKBKE	9641	symbol	H. sapiens	9641	H. sapiens	IKBKE	inhibitor of nuclear factor kappa B kinase subunit epsilon	GO:0097396 response to interleukin-17;GO:0097398 cellular response to interleukin-17;GO:0097400 interleukin-17-mediated signaling pathway	Other	Enzymes; Kinases; Predicted intracellular proteins; ENZYME proteins:Transferases	Cytosol (Supported)	Fostamatinib			0.0	0.0	1.0	1.0	0.0	0.0	0.0	0.0	0.0	0.0	0.0	0.0	0.0	0.0	0.0	0.0	0.0	1.0	1.0	0.0
FAHD2B	151313	symbol	H. sapiens	151313	H. sapiens	FAHD2B	fumarylacetoacetate hydrolase domain containing 2B			Predicted intracellular proteins					0.0	0.0	0.0	0.0	0.0	0.0	0.0	0.0	0.0	0.0	0.0	0.0	0.0	0.0	0.0	0.0	0.0	0.0	0.0	0.0
FLOT2	2319	symbol	H. sapiens	2319	H. sapiens	FLOT2	flotillin 2	GO:1903905 positive regulation of establishment of T cell polarity;GO:0044860 protein localization to plasma membrane raft;GO:1903903 regulation of establishment of T cell polarity		Predicted intracellular proteins	Plasma membrane (Supported); Additional: Vesicles		(M1315)SIG PIP3 SIGNALING IN B LYMPHOCYTES; (M8626)SIG BCR SIGNALING PATHWAY; (M7955)SIG INSULIN RECEPTOR PATHWAY IN CARDIAC MYOCYTES	(M5916)HALLMARK APICAL SURFACE	0.0	1.0	1.0	0.0	0.0	0.0	0.0	0.0	0.0	0.0	0.0	0.0	1.0	0.0	0.0	0.0	0.0	0.0	0.0	1.0
MYRIP	25924	symbol	H. sapiens	25924	H. sapiens	MYRIP	myosin VIIA and Rab interacting protein	GO:0032024 positive regulation of insulin secretion;GO:0090277 positive regulation of peptide hormone secretion;GO:0002793 positive regulation of peptide secretion		Predicted intracellular proteins	Golgi apparatus;Nucleoli fibrillar center;Nucleoplasm (Approved)				0.0	0.0	0.0	0.0	0.0	0.0	0.0	0.0	0.0	0.0	0.0	0.0	0.0	0.0	0.0	0.0	1.0	0.0	0.0	0.0
RAP1GAP2	23108	symbol	H. sapiens	23108	H. sapiens	RAP1GAP2	RAP1 GTPase activating protein 2	GO:0090630 activation of GTPase activity;GO:0008361 regulation of cell size;GO:0043547 positive regulation of GTPase activity		Predicted intracellular proteins	Cytosol;Nuclear membrane (Supported)				0.0	0.0	0.0	0.0	0.0	0.0	0.0	0.0	0.0	0.0	0.0	0.0	0.0	0.0	0.0	0.0	0.0	0.0	0.0	0.0
DPP3	10072	symbol	H. sapiens	10072	H. sapiens	DPP3	dipeptidyl peptidase 3	GO:0006508 proteolysis;GO:0019538 protein metabolic process;GO:1901564 organonitrogen compound metabolic process		Enzymes; ENZYME proteins:Hydrolases; Predicted intracellular proteins; Peptidases:Metallopeptidases	Cytosol (Supported)				0.0	0.0	0.0	0.0	0.0	0.0	0.0	0.0	0.0	0.0	0.0	0.0	0.0	0.0	0.0	0.0	0.0	0.0	0.0	0.0
ANKRD33B	651746	symbol	H. sapiens	651746	H. sapiens	ANKRD33B	ankyrin repeat domain 33B			Predicted intracellular proteins	Mitochondria (Approved)				0.0	0.0	0.0	0.0	0.0	0.0	0.0	0.0	0.0	0.0	0.0	0.0	0.0	0.0	0.0	0.0	0.0	0.0	0.0	0.0
LHX2	9355	symbol	H. sapiens	9355	H. sapiens	LHX2	LIM homeobox 2	GO:0035090 maintenance of apical/basal cell polarity;GO:0045199 maintenance of epithelial cell apical/basal polarity;GO:0021978 telencephalon regionalization		Transcription factors:Helix-turn-helix domains; Predicted intracellular proteins	Nucleoplasm (Approved)			(M5941)HALLMARK UV RESPONSE UP	1.0	1.0	0.0	1.0	0.0	1.0	1.0	1.0	0.0	0.0	1.0	0.0	0.0	0.0	0.0	0.0	0.0	0.0	0.0	1.0
ISG15	9636	symbol	H. sapiens	9636	H. sapiens	ISG15	ISG15 ubiquitin like modifier	GO:0032461 positive regulation of protein oligomerization;GO:0032459 regulation of protein oligomerization;GO:0032020 ISG15-protein conjugation		Human disease related genes:Immune system diseases:Primary immunodeficiency; Predicted secreted proteins; Predicted intracellular proteins; Disease related genes				(M5911)HALLMARK INTERFERON ALPHA RESPONSE; (M5913)HALLMARK INTERFERON GAMMA RESPONSE	0.0	1.0	0.0	1.0	0.0	0.0	0.0	0.0	0.0	0.0	0.0	0.0	0.0	0.0	0.0	0.0	0.0	1.0	0.0	0.0
TLL1	7092	symbol	H. sapiens	7092	H. sapiens	TLL1	tolloid like 1	GO:0030199 collagen fibril organization;GO:0030198 extracellular matrix organization;GO:0043062 extracellular structure organization		Human disease related genes:Congenital malformations:Congenital malformations of the circulatory system; Predicted secreted proteins; Predicted intracellular proteins; Disease related genes	Vesicles (Approved)		(M3468)NABA ECM REGULATORS; (M5885)NABA MATRISOME ASSOCIATED; (M5889)NABA MATRISOME		0.0	1.0	0.0	0.0	0.0	0.0	0.0	0.0	0.0	0.0	0.0	0.0	0.0	0.0	0.0	1.0	0.0	0.0	0.0	0.0
DNMT3A	1788	symbol	H. sapiens	1788	H. sapiens	DNMT3A	DNA methyltransferase 3 alpha	GO:1903925 response to bisphenol A;GO:1903926 cellular response to bisphenol A;GO:0090116 C-5 methylation of cytosine		Cancer-related genes:Mutated cancer genes; Human disease related genes:Cancers:Cancers of haematopoietic and lymphoid tissues; Human disease related genes:Cardiovascular diseases:Hematologic diseases; Cancer-related genes:Mutational cancer driver genes; Transcription factors:Zinc-coordinating DNA-binding domains; Human disease related genes:Congenital malformations:Other congenital malformations;…	Nucleoplasm (Supported)	Procaine	(M254)PID MYC REPRESS PATHWAY		0.0	1.0	0.0	0.0	0.0	0.0	0.0	0.0	1.0	1.0	0.0	0.0	0.0	0.0	0.0	0.0	0.0	0.0	1.0	0.0
EIF3F	8665	symbol	H. sapiens	8665	H. sapiens	EIF3F	eukaryotic translation initiation factor 3 subunit F	GO:0075522 IRES-dependent viral translational initiation;GO:0019081 viral translation;GO:0019080 viral gene expression		Human disease related genes:Other diseases:Mental and behavioural disorders; ENZYME proteins:Hydrolases; Disease related genes; Potential drug targets; Enzymes; Predicted intracellular proteins		Quercetin			0.0	0.0	0.0	0.0	0.0	0.0	0.0	0.0	0.0	0.0	0.0	0.0	0.0	0.0	0.0	0.0	0.0	0.0	0.0	0.0
GCLC	2729	symbol	H. sapiens	2729	H. sapiens	GCLC	glutamate-cysteine ligase catalytic subunit	GO:0097069 cellular response to thyroxine stimulus;GO:1904387 cellular response to L-phenylalanine derivative;GO:2000490 negative regulation of hepatic stellate cell activation		ENZYME proteins:Ligase; Human disease related genes:Cardiovascular diseases:Hematologic diseases; Human disease related genes:Congenital disorders of metabolism:Congenital disorders of amino acid metabolism; Disease related genes; Potential drug targets; Enzymes; Predicted intracellular proteins	Nucleoplasm (Approved); Additional: Cytosol;Nucleoli	Glutamic acid; Cysteine		(M5938)HALLMARK REACTIVE OXYGEN SPECIES PATHWAY; (M5924)HALLMARK MTORC1 SIGNALING; (M5934)HALLMARK XENOBIOTIC METABOLISM	0.0	0.0	0.0	0.0	0.0	0.0	0.0	0.0	1.0	1.0	0.0	1.0	0.0	0.0	0.0	0.0	0.0	1.0	1.0	0.0
ATP6V0A1	535	symbol	H. sapiens	535	H. sapiens	ATP6V0A1	ATPase H+ transporting V0 subunit a1	GO:0007035 vacuolar acidification;GO:0051452 intracellular pH reduction;GO:1901998 toxin transport		Transporters:Primary Active Transporters; Predicted intracellular proteins	Golgi apparatus;Vesicles (Approved); Additional: Cytosol;Nuclear speckles	Tiludronic acid		(M5945)HALLMARK HEME METABOLISM	0.0	0.0	0.0	1.0	0.0	0.0	0.0	0.0	0.0	0.0	0.0	1.0	0.0	0.0	0.0	0.0	0.0	0.0	1.0	0.0
LZTS1	11178	symbol	H. sapiens	11178	H. sapiens	LZTS1	leucine zipper tumor suppressor 1	GO:0016242 negative regulation of macroautophagy;GO:0048814 regulation of dendrite morphogenesis;GO:0010507 negative regulation of autophagy		Predicted intracellular proteins; Disease related genes	Plasma membrane (Approved); Additional: Nucleoli				0.0	0.0	0.0	0.0	0.0	1.0	0.0	0.0	0.0	0.0	0.0	0.0	0.0	0.0	0.0	0.0	0.0	0.0	0.0	0.0
GBX2	2637	symbol	H. sapiens	2637	H. sapiens	GBX2	gastrulation brain homeobox 2	GO:0021568 rhombomere 2 development;GO:0021555 midbrain-hindbrain boundary morphogenesis;GO:0021534 cell proliferation in hindbrain		Transcription factors:Helix-turn-helix domains; Predicted intracellular proteins	Nucleoplasm (Approved)				1.0	1.0	0.0	0.0	0.0	1.0	1.0	1.0	0.0	0.0	0.0	0.0	0.0	0.0	0.0	0.0	0.0	0.0	0.0	0.0
VCL	7414	symbol	H. sapiens	7414	H. sapiens	VCL	vinculin	GO:1904702 regulation of protein localization to adherens junction;GO:0150106 regulation of protein localization to cell-cell junction;GO:0034333 adherens junction assembly		Predicted intracellular proteins; Human disease related genes:Cardiovascular diseases:Cardiac diseases; Disease related genes	Focal adhesion sites (Enhanced)		(M232)PID ECADHERIN STABILIZATION PATHWAY; (M12)PID RHOA PATHWAY; (M281)PID FAK PATHWAY	(M5893)HALLMARK MITOTIC SPINDLE; (M5915)HALLMARK APICAL JUNCTION	0.0	1.0	0.0	0.0	0.0	1.0	0.0	1.0	0.0	0.0	0.0	0.0	1.0	0.0	0.0	0.0	0.0	1.0	1.0	0.0
MAP4K2	5871	symbol	H. sapiens	5871	H. sapiens	MAP4K2	mitogen-activated protein kinase kinase kinase kinase 2	GO:0006903 vesicle targeting;GO:0043507 positive regulation of JUN kinase activity;GO:0007254 JNK cascade	STE Ser/Thr protein kinase family	Enzymes; Kinases:STE Ser/Thr protein kinases; Predicted intracellular proteins; ENZYME proteins:Transferases	Vesicles (Approved)	Fostamatinib	(M128)PID TNF PATHWAY	(M5915)HALLMARK APICAL JUNCTION	0.0	0.0	1.0	0.0	0.0	0.0	0.0	0.0	0.0	0.0	0.0	0.0	0.0	0.0	0.0	0.0	0.0	0.0	0.0	0.0
DHCR7	1717	symbol	H. sapiens	1717	H. sapiens	DHCR7	7-dehydrocholesterol reductase	GO:0016128 phytosteroid metabolic process;GO:0016129 phytosteroid biosynthetic process;GO:0016131 brassinosteroid metabolic process		ENZYME proteins:Oxidoreductases; Human disease related genes:Congenital disorders of metabolism:Congenital disorders of lipid/glycolipid metabolism; Disease related genes; Potential drug targets; Enzymes	Endoplasmic reticulum (Supported)	NADH		(M5892)HALLMARK CHOLESTEROL HOMEOSTASIS; (M5905)HALLMARK ADIPOGENESIS; (M5906)HALLMARK ESTROGEN RESPONSE EARLY	0.0	0.0	0.0	0.0	0.0	0.0	0.0	0.0	0.0	0.0	0.0	0.0	0.0	0.0	0.0	0.0	0.0	0.0	0.0	0.0
CELSR2	1952	symbol	H. sapiens	1952	H. sapiens	CELSR2	cadherin EGF LAG seven-pass G-type receptor 2	GO:0021999 neural plate anterior/posterior regionalization;GO:0033326 cerebrospinal fluid secretion;GO:0060897 neural plate regionalization		G-protein coupled receptors:GPCRs excl olfactory receptors; G-protein coupled receptors:Family 2 (B) receptors	Cytosol (Approved)			(M5906)HALLMARK ESTROGEN RESPONSE EARLY; (M5907)HALLMARK ESTROGEN RESPONSE LATE; (M5956)HALLMARK KRAS SIGNALING DN	1.0	1.0	0.0	1.0	0.0	0.0	0.0	1.0	0.0	0.0	0.0	1.0	0.0	0.0	0.0	0.0	0.0	0.0	0.0	0.0
NAT14	57106	symbol	H. sapiens	57106	H. sapiens	NAT14	N-acetyltransferase 14 (putative)	GO:0006352 DNA-templated transcription, initiation;GO:0006351 transcription, DNA-templated;GO:0097659 nucleic acid-templated transcription		Predicted intracellular proteins	Mitochondria (Approved)				0.0	0.0	0.0	0.0	0.0	0.0	0.0	0.0	0.0	0.0	0.0	0.0	0.0	0.0	0.0	0.0	0.0	0.0	0.0	0.0
TMEM25	84866	symbol	H. sapiens	84866	H. sapiens	TMEM25	transmembrane protein 25	GO:0090394 negative regulation of excitatory postsynaptic potential;GO:0098815 modulation of excitatory postsynaptic potential;GO:0050805 negative regulation of synaptic transmission		Transporters:Accessory Factors Involved in Transport; Predicted intracellular proteins	Golgi apparatus;Vesicles (Approved)				0.0	0.0	0.0	0.0	0.0	0.0	0.0	0.0	0.0	0.0	0.0	0.0	0.0	0.0	0.0	0.0	0.0	0.0	0.0	0.0
HES5	388585	symbol	H. sapiens	388585	H. sapiens	HES5	hes family bHLH transcription factor 5	GO:2000978 negative regulation of forebrain neuron differentiation;GO:1905457 negative regulation of lymphoid progenitor cell differentiation;GO:2000974 negative regulation of pro-B cell differentiation		Transcription factors:Basic domains; Predicted intracellular proteins	Nucleoplasm (Approved); Additional: Cytosol;Nuclear speckles		(M81)PID CDC42 PATHWAY		1.0	1.0	1.0	1.0	0.0	1.0	1.0	1.0	0.0	0.0	1.0	0.0	1.0	1.0	0.0	1.0	0.0	0.0	0.0	0.0
FADS2	9415	symbol	H. sapiens	9415	H. sapiens	FADS2	fatty acid desaturase 2	GO:0036109 alpha-linolenic acid metabolic process;GO:0043651 linoleic acid metabolic process;GO:0006636 unsaturated fatty acid biosynthetic process		Enzymes; FDA approved drug targets:Small molecule drugs; Predicted intracellular proteins; ENZYME proteins:Oxidoreductases		alpha-Linolenic acid		(M5892)HALLMARK CHOLESTEROL HOMEOSTASIS; (M5948)HALLMARK BILE ACID METABOLISM; (M5924)HALLMARK MTORC1 SIGNALING	0.0	0.0	0.0	0.0	0.0	0.0	0.0	0.0	0.0	0.0	0.0	0.0	0.0	0.0	0.0	0.0	0.0	0.0	0.0	0.0
9-Sep						None	None	None	None	None	None	None	None	None	nan	nan	nan	nan	nan	nan	nan	nan	nan	nan	nan	nan	nan	nan	nan	nan	nan	nan	nan	nan
C22orf23	84645	symbol	H. sapiens	84645	H. sapiens	C22orf23	chromosome 22 open reading frame 23	GO:0008150 biological_process		Predicted intracellular proteins	Nucleoplasm (Approved)				0.0	0.0	0.0	0.0	0.0	0.0	0.0	0.0	0.0	0.0	0.0	0.0	0.0	0.0	0.0	0.0	0.0	0.0	0.0	0.0
LETM2	137994	symbol	H. sapiens	137994	H. sapiens	LETM2	leucine zipper and EF-hand containing transmembrane protein 2	GO:0006875 cellular metal ion homeostasis;GO:0055065 metal ion homeostasis;GO:0030003 cellular cation homeostasis		Predicted intracellular proteins	Nucleoplasm (Approved); Additional: Cytosol;Nuclear bodies				0.0	0.0	0.0	0.0	0.0	0.0	0.0	0.0	0.0	0.0	0.0	0.0	0.0	0.0	0.0	0.0	0.0	0.0	0.0	0.0
ZNF185	7739	symbol	H. sapiens	7739	H. sapiens	ZNF185	zinc finger protein 185 with LIM domain			Predicted intracellular proteins	Cytosol;Plasma membrane (Supported); Additional: Actin filaments;Focal adhesion sites			(M5906)HALLMARK ESTROGEN RESPONSE EARLY	0.0	0.0	0.0	0.0	0.0	0.0	0.0	0.0	0.0	0.0	0.0	0.0	0.0	0.0	0.0	0.0	0.0	0.0	0.0	0.0
AIG1	51390	symbol	H. sapiens	51390	H. sapiens	AIG1	androgen induced 1	GO:0042758 long-chain fatty acid catabolic process;GO:0009062 fatty acid catabolic process;GO:0072329 monocarboxylic acid catabolic process		Transporters; Predicted intracellular proteins	Golgi apparatus (Approved)				0.0	0.0	0.0	0.0	0.0	0.0	0.0	0.0	0.0	0.0	0.0	0.0	0.0	0.0	0.0	0.0	0.0	0.0	0.0	0.0
TSPAN9	10867	symbol	H. sapiens	10867	H. sapiens	TSPAN9	tetraspanin 9	GO:0008150 biological_process		Transporters:Accessory Factors Involved in Transport	Golgi apparatus;Nucleoplasm (Approved); Additional: Cytosol				0.0	0.0	0.0	0.0	0.0	0.0	0.0	0.0	0.0	0.0	0.0	0.0	0.0	0.0	0.0	0.0	0.0	0.0	0.0	0.0
DLK1	8788	symbol	H. sapiens	8788	H. sapiens	DLK1	delta like non-canonical Notch ligand 1	GO:0045746 negative regulation of Notch signaling pathway;GO:0008593 regulation of Notch signaling pathway;GO:0009968 negative regulation of signal transduction		Predicted intracellular proteins	Golgi apparatus (Approved)		(M106)PID HNF3B PATHWAY; (M17)PID NOTCH PATHWAY		0.0	0.0	0.0	1.0	0.0	0.0	0.0	0.0	0.0	0.0	0.0	0.0	0.0	0.0	0.0	0.0	0.0	0.0	0.0	0.0
RASL10B	91608	symbol	H. sapiens	91608	H. sapiens	RASL10B	RAS like family 10 member B	GO:0003050 regulation of systemic arterial blood pressure by atrial natriuretic peptide;GO:0001990 regulation of systemic arterial blood pressure by hormone;GO:0003044 regulation of systemic arterial blood pressure mediated by a chemical signal		Enzymes; ENZYME proteins:Hydrolases; Predicted intracellular proteins	Vesicles (Approved)				0.0	0.0	0.0	0.0	0.0	0.0	0.0	0.0	0.0	0.0	0.0	0.0	0.0	0.0	0.0	0.0	0.0	0.0	0.0	0.0
PANK4	55229	symbol	H. sapiens	55229	H. sapiens	PANK4	pantothenate kinase 4 (inactive)	GO:0015937 coenzyme A biosynthetic process;GO:0015936 coenzyme A metabolic process;GO:0033866 nucleoside bisphosphate biosynthetic process		Predicted intracellular proteins	Cytosol (Approved)				0.0	0.0	0.0	0.0	0.0	0.0	0.0	0.0	0.0	0.0	0.0	0.0	0.0	0.0	0.0	0.0	0.0	0.0	0.0	0.0
PTPN3	5774	symbol	H. sapiens	5774	H. sapiens	PTPN3	protein tyrosine phosphatase non-receptor type 3	GO:0098902 regulation of membrane depolarization during action potential;GO:0051045 negative regulation of membrane protein ectodomain proteolysis;GO:0051043 regulation of membrane protein ectodomain proteolysis		Enzymes; ENZYME proteins:Hydrolases; Predicted intracellular proteins					0.0	1.0	1.0	0.0	0.0	0.0	0.0	0.0	0.0	0.0	0.0	1.0	1.0	0.0	0.0	0.0	0.0	0.0	0.0	0.0
EIF2AK4	440275	symbol	H. sapiens	440275	H. sapiens	EIF2AK4	eukaryotic translation initiation factor 2 alpha kinase 4	GO:0036492 eiF2alpha phosphorylation in response to endoplasmic reticulum stress;GO:0071262 regulation of translational initiation in response to starvation;GO:0071264 positive regulation of translational initiation in response to starvation	Other	Human disease related genes:Cardiovascular diseases:Vascular diseases; Predicted intracellular proteins; Disease related genes; Potential drug targets; Enzymes; Kinases; Human disease related genes:Cardiovascular diseases:Hypertensive diseases; ENZYME proteins:Transferases	Cytosol (Approved)	Fostamatinib			0.0	1.0	1.0	0.0	0.0	1.0	0.0	1.0	0.0	0.0	0.0	0.0	0.0	0.0	0.0	0.0	0.0	1.0	1.0	0.0
BMP4	652	symbol	H. sapiens	652	H. sapiens	BMP4	bone morphogenetic protein 4	GO:0048390 intermediate mesoderm morphogenesis;GO:0048391 intermediate mesoderm formation;GO:0048392 intermediate mesodermal cell differentiation		Human disease related genes:Congenital malformations:Congenital malformations of eye; Cancer-related genes:Candidate cancer biomarkers; Predicted secreted proteins; Disease related genes; Human disease related genes:Congenital malformations:Congenital malformations of face and neck; Predicted intracellular proteins		Calcium	(M181)PID BMP PATHWAY; (M5883)NABA SECRETED FACTORS; (M5885)NABA MATRISOME ASSOCIATED		1.0	1.0	1.0	1.0	0.0	1.0	1.0	1.0	0.0	0.0	0.0	1.0	1.0	0.0	0.0	1.0	1.0	0.0	1.0	0.0
GCNT4	51301	symbol	H. sapiens	51301	H. sapiens	GCNT4	glucosaminyl (N-acetyl) transferase 4	GO:0002121 inter-male aggressive behavior;GO:0002118 aggressive behavior;GO:0042403 thyroid hormone metabolic process		Enzymes; Predicted intracellular proteins; ENZYME proteins:Transferases	Golgi apparatus (Supported); Additional: Nucleoplasm				0.0	1.0	0.0	0.0	0.0	0.0	0.0	0.0	0.0	0.0	0.0	0.0	0.0	0.0	0.0	0.0	0.0	0.0	0.0	0.0
SCD5	79966	symbol	H. sapiens	79966	H. sapiens	SCD5	stearoyl-CoA desaturase 5	GO:1903966 monounsaturated fatty acid biosynthetic process;GO:1903964 monounsaturated fatty acid metabolic process;GO:0006636 unsaturated fatty acid biosynthetic process		Enzymes; ENZYME proteins:Oxidoreductases					0.0	0.0	0.0	0.0	0.0	0.0	0.0	0.0	0.0	0.0	0.0	0.0	0.0	0.0	0.0	0.0	0.0	0.0	0.0	0.0
HMCES	56941	symbol	H. sapiens	56941	H. sapiens	HMCES	5-hydroxymethylcytosine binding, ES cell specific	GO:0018142 protein-DNA covalent cross-linking;GO:0018143 nucleic acid-protein covalent cross-linking;GO:0097681 double-strand break repair via alternative nonhomologous end joining		Predicted intracellular proteins	Nucleoplasm (Approved)				0.0	0.0	0.0	0.0	0.0	0.0	0.0	0.0	0.0	0.0	0.0	0.0	0.0	0.0	0.0	0.0	0.0	0.0	0.0	0.0
PLCB1	23236	symbol	H. sapiens	23236	H. sapiens	PLCB1	phospholipase C beta 1	GO:0060466 activation of meiosis involved in egg activation;GO:1905630 response to glyceraldehyde;GO:1905631 cellular response to glyceraldehyde		Human disease related genes:Nervous system diseases:Epilepsy; ENZYME proteins:Hydrolases; Disease related genes; Potential drug targets; Enzymes; Predicted intracellular proteins	Plasma membrane (Approved)		(M252)PID IL8 CXCR1 PATHWAY; (M213)PID AR NONGENOMIC PATHWAY; (M210)PID IL8 CXCR2 PATHWAY	(M5923)HALLMARK PI3K AKT MTOR SIGNALING	1.0	1.0	1.0	1.0	0.0	1.0	0.0	0.0	1.0	1.0	0.0	1.0	1.0	0.0	1.0	0.0	0.0	1.0	1.0	0.0
RBMS2	5939	symbol	H. sapiens	5939	H. sapiens	RBMS2	RNA binding motif single stranded interacting protein 2	GO:0006396 RNA processing;GO:0016070 RNA metabolic process;GO:0010467 gene expression		Predicted intracellular proteins	Nucleoli fibrillar center (Approved); Additional: Cytosol;Nucleoplasm				0.0	0.0	0.0	0.0	0.0	0.0	0.0	0.0	0.0	0.0	0.0	0.0	0.0	0.0	0.0	0.0	0.0	0.0	0.0	0.0
SCUBE3	222663	symbol	H. sapiens	222663	H. sapiens	SCUBE3	signal peptide, CUB domain and EGF like domain containing 3	GO:0030513 positive regulation of BMP signaling pathway;GO:0045669 positive regulation of osteoblast differentiation;GO:0030510 regulation of BMP signaling pathway		Predicted secreted proteins	Plasma membrane (Approved)		(M5883)NABA SECRETED FACTORS; (M5885)NABA MATRISOME ASSOCIATED; (M5889)NABA MATRISOME		0.0	1.0	0.0	0.0	0.0	0.0	0.0	0.0	0.0	0.0	0.0	0.0	0.0	0.0	0.0	0.0	0.0	0.0	0.0	0.0
TCAF1	9747	symbol	H. sapiens	9747	H. sapiens	TCAF1	TRPM8 channel associated factor 1	GO:1901529 positive regulation of anion channel activity;GO:0010359 regulation of anion channel activity;GO:1903961 positive regulation of anion transmembrane transport		Predicted intracellular proteins	Cell Junctions (Approved); Additional: Nuclear bodies;Vesicles				0.0	0.0	0.0	0.0	0.0	0.0	0.0	0.0	0.0	0.0	0.0	0.0	0.0	0.0	0.0	0.0	1.0	0.0	0.0	0.0
FOXC1	2296	symbol	H. sapiens	2296	H. sapiens	FOXC1	forkhead box C1	GO:1902038 positive regulation of hematopoietic stem cell differentiation;GO:1902257 negative regulation of apoptotic process involved in outflow tract morphogenesis;GO:1901491 negative regulation of lymphangiogenesis		Human disease related genes:Congenital malformations:Congenital malformations of eye; Transcription factors:Helix-turn-helix domains; Predicted intracellular proteins; Disease related genes	Nucleoplasm (Supported); Additional: Cytosol			(M5906)HALLMARK ESTROGEN RESPONSE EARLY; (M5907)HALLMARK ESTROGEN RESPONSE LATE	1.0	1.0	0.0	0.0	0.0	0.0	1.0	1.0	0.0	0.0	0.0	1.0	1.0	0.0	0.0	1.0	0.0	1.0	0.0	0.0
MBP	4155	symbol	H. sapiens	4155	H. sapiens	MBP	myelin basic protein	GO:1904685 positive regulation of metalloendopeptidase activity;GO:2000343 positive regulation of chemokine (C-X-C motif) ligand 2 production;GO:0046689 response to mercury ion		Predicted intracellular proteins; Candidate cardiovascular disease genes; Disease related genes	Plasma membrane (Approved)			(M5938)HALLMARK REACTIVE OXYGEN SPECIES PATHWAY	1.0	1.0	1.0	1.0	0.0	1.0	0.0	0.0	1.0	0.0	0.0	0.0	0.0	0.0	0.0	0.0	0.0	1.0	1.0	0.0
ANK1	286	symbol	H. sapiens	286	H. sapiens	ANK1	ankyrin 1	GO:0035090 maintenance of apical/basal cell polarity;GO:0045199 maintenance of epithelial cell apical/basal polarity;GO:0030011 maintenance of cell polarity		Transporters:Accessory Factors Involved in Transport; Human disease related genes:Cardiovascular diseases:Hematologic diseases; Disease related genes; Potential drug targets; Predicted intracellular proteins				(M5945)HALLMARK HEME METABOLISM	0.0	0.0	0.0	1.0	0.0	0.0	0.0	0.0	0.0	0.0	1.0	0.0	0.0	0.0	0.0	0.0	0.0	0.0	0.0	0.0
MAP3K1	4214	symbol	H. sapiens	4214	H. sapiens	MAP3K1	mitogen-activated protein kinase kinase kinase 1	GO:0038095 Fc-epsilon receptor signaling pathway;GO:0038093 Fc receptor signaling pathway;GO:0071260 cellular response to mechanical stimulus	STE Ser/Thr protein kinase family	FDA approved drug targets:Small molecule drugs; Cancer-related genes:Mutated cancer genes; Human disease related genes:Reproductive system diseases:Reproductive system diseases; Cancer-related genes:Mutational cancer driver genes; Disease related genes; Enzymes; Kinases:STE Ser/Thr protein kinases; ENZYME proteins:Transferases	Cytosol (Approved)	AZD-8330; Binimetinib; Fostamatinib	(M190)PID TCR JNK PATHWAY; (M228)PID SMAD2 3PATHWAY; (M17200)SA B CELL RECEPTOR COMPLEXES	(M5891)HALLMARK HYPOXIA; (M5953)HALLMARK KRAS SIGNALING UP	0.0	0.0	1.0	1.0	0.0	0.0	0.0	0.0	0.0	0.0	0.0	0.0	1.0	0.0	0.0	0.0	0.0	0.0	1.0	0.0
NEFH	4744	symbol	H. sapiens	4744	H. sapiens	NEFH	neurofilament heavy chain	GO:0048936 peripheral nervous system neuron axonogenesis;GO:0033693 neurofilament bundle assembly;GO:0099185 postsynaptic intermediate filament cytoskeleton organization		Predicted intracellular proteins; Human disease related genes:Nervous system diseases:Neurodegenerative diseases; Disease related genes				(M5951)HALLMARK SPERMATOGENESIS; (M5902)HALLMARK APOPTOSIS	0.0	0.0	0.0	0.0	1.0	0.0	0.0	1.0	0.0	0.0	0.0	0.0	0.0	0.0	0.0	0.0	1.0	1.0	0.0	0.0
TMEM35	59353	gene_synonym	H. sapiens	59353	H. sapiens	TMEM35A	transmembrane protein 35A	GO:2000010 positive regulation of protein localization to cell surface;GO:0051131 chaperone-mediated protein complex assembly;GO:2000008 regulation of protein localization to cell surface			Vesicles (Supported); Additional: Cytosol;Focal adhesion sites				0.0	0.0	0.0	0.0	0.0	0.0	0.0	0.0	0.0	0.0	0.0	0.0	0.0	0.0	0.0	0.0	1.0	0.0	0.0	0.0
CNKSR3	154043	symbol	H. sapiens	154043	H. sapiens	CNKSR3	CNKSR family member 3	GO:2000651 positive regulation of sodium ion transmembrane transporter activity;GO:1902307 positive regulation of sodium ion transmembrane transport;GO:0033137 negative regulation of peptidyl-serine phosphorylation		Predicted intracellular proteins	Cytosol (Supported); Additional: Mitochondria				0.0	0.0	1.0	0.0	0.0	0.0	0.0	0.0	0.0	0.0	0.0	0.0	0.0	0.0	0.0	0.0	0.0	0.0	0.0	0.0
SHISA5	51246	symbol	H. sapiens	51246	H. sapiens	SHISA5	shisa family member 5	GO:0042771 intrinsic apoptotic signaling pathway in response to DNA damage by p53 class mediator;GO:0072332 intrinsic apoptotic signaling pathway by p53 class mediator;GO:0008630 intrinsic apoptotic signaling pathway in response to DNA damage		Predicted intracellular proteins					0.0	0.0	0.0	0.0	0.0	0.0	0.0	0.0	0.0	0.0	0.0	0.0	0.0	0.0	0.0	0.0	0.0	0.0	0.0	0.0
WNT2B	7482	symbol	H. sapiens	7482	H. sapiens	WNT2B	Wnt family member 2B	GO:0060492 lung induction;GO:0061046 regulation of branching involved in lung morphogenesis;GO:0060638 mesenchymal-epithelial cell signaling		Predicted intracellular proteins; Predicted secreted proteins; Human disease related genes:Digestive system diseases:Gastrointestinal diseases; Disease related genes	Vesicles (Approved); Additional: Nucleoplasm		(M5493)WNT SIGNALING; (M5883)NABA SECRETED FACTORS; (M5885)NABA MATRISOME ASSOCIATED		1.0	1.0	1.0	1.0	0.0	0.0	0.0	0.0	0.0	0.0	0.0	0.0	0.0	0.0	0.0	1.0	0.0	0.0	1.0	0.0
CDH3	1001	symbol	H. sapiens	1001	H. sapiens	CDH3	cadherin 3	GO:0051796 negative regulation of timing of catagen;GO:0060901 regulation of hair cycle by canonical Wnt signaling pathway;GO:1902910 positive regulation of melanosome transport		Human disease related genes:Congenital malformations:Other congenital malformations; Predicted intracellular proteins; Disease related genes	Plasma membrane (Supported); Additional: Cell Junctions			(M5915)HALLMARK APICAL JUNCTION	0.0	1.0	1.0	1.0	0.0	0.0	0.0	0.0	0.0	0.0	0.0	0.0	0.0	1.0	1.0	0.0	1.0	0.0	1.0	1.0
FGFR1	2260	symbol	H. sapiens	2260	H. sapiens	FGFR1	fibroblast growth factor receptor 1	GO:1904849 positive regulation of cell chemotaxis to fibroblast growth factor;GO:2000546 positive regulation of endothelial cell chemotaxis to fibroblast growth factor;GO:2000544 regulation of endothelial cell chemotaxis to fibroblast growth factor	Tyr protein kinase family	FDA approved drug targets:Small molecule drugs; CD markers; Cancer-related genes:Candidate cancer biomarkers; Transporters:Accessory Factors Involved in Transport; Human disease related genes:Congenital malformations:Congenital malformations of the musculoskeletal system; Human disease related genes:Cancers:Cancers of the breast and female genital organs; Human disease related genes:Congenital ma…		Palifermin; Sorafenib; Heparin; 3-[4-(1-formylpiperazin-4-yl)-benzylidenyl]-2-indolinone; XL999; 3-(3-methoxybenzyl)-1H-pyrrolo[2,3-b]pyridine; (E)-[4-(3,5-Difluorophenyl)-3H-pyrrolo[2,3-b]pyridin-3-ylidene](3-methoxyphenyl)methanol; 3-[(3-(2-CARBOXYETHYL)-4-METHYLPYRROL-2-YL)METHYLENE]-2-INDOLINONE; Regorafenib; Ponatinib; Lenvatinib; Nintedanib; Fostamatinib; Erdafitinib; Pemigatinib; Selpercat…	(M33)PID GLYPICAN 1PATHWAY; (M165)PID SYNDECAN 4 PATHWAY; (M266)PID NCADHERIN PATHWAY	(M5944)HALLMARK ANGIOGENESIS	0.0	1.0	1.0	1.0	0.0	0.0	0.0	0.0	0.0	0.0	0.0	1.0	0.0	0.0	1.0	0.0	0.0	0.0	1.0	0.0
KIAA1217	56243	symbol	H. sapiens	56243	H. sapiens	KIAA1217	KIAA1217	GO:0048706 embryonic skeletal system development;GO:0001501 skeletal system development;GO:0043009 chordate embryonic development		Predicted intracellular proteins	Cytosol;Nucleoplasm (Approved)				0.0	1.0	0.0	0.0	0.0	0.0	0.0	0.0	0.0	0.0	0.0	0.0	0.0	0.0	0.0	0.0	0.0	0.0	0.0	0.0
GMDS	2762	symbol	H. sapiens	2762	H. sapiens	GMDS	GDP-mannose 4,6-dehydratase	GO:0042351 'de novo' GDP-L-fucose biosynthetic process;GO:0042350 GDP-L-fucose biosynthetic process;GO:0046368 GDP-L-fucose metabolic process		Enzymes; ENZYME proteins:Lyases; Predicted intracellular proteins		Guanosine-5'-Diphosphate-Rhamnose; Guanosine-5'-Diphosphate			0.0	0.0	0.0	0.0	0.0	0.0	0.0	0.0	0.0	0.0	0.0	0.0	0.0	0.0	0.0	0.0	0.0	0.0	0.0	0.0
KPNA6	23633	symbol	H. sapiens	23633	H. sapiens	KPNA6	karyopherin subunit alpha 6	GO:0075506 entry of viral genome into host nucleus through nuclear pore complex via importin;GO:0075732 viral penetration into host nucleus;GO:0075733 intracellular transport of virus		Transporters:Transporter channels and pores; Predicted intracellular proteins	Cytosol (Approved); Additional: Nucleoplasm				0.0	0.0	0.0	0.0	0.0	0.0	0.0	0.0	0.0	0.0	0.0	0.0	0.0	0.0	0.0	0.0	0.0	0.0	0.0	0.0
FOS	2353	symbol	H. sapiens	2353	H. sapiens	FOS	Fos proto-oncogene, AP-1 transcription factor subunit	GO:0001661 conditioned taste aversion;GO:0009629 response to gravity;GO:0030431 sleep		Transcription factors:Basic domains; Predicted intracellular proteins; Cancer-related genes:Candidate cancer biomarkers	Nucleoplasm (Supported)	Nadroparin	(M134)PID TCR RAS PATHWAY; (M206)PID PDGFRA PATHWAY; (M268)PID S1P S1P2 PATHWAY	(M5941)HALLMARK UV RESPONSE UP; (M5890)HALLMARK TNFA SIGNALING VIA NFKB; (M5891)HALLMARK HYPOXIA	0.0	1.0	1.0	1.0	0.0	0.0	0.0	0.0	1.0	1.0	0.0	1.0	1.0	0.0	0.0	0.0	0.0	1.0	1.0	0.0
COX7C	1350	symbol	H. sapiens	1350	H. sapiens	COX7C	cytochrome c oxidase subunit 7C	GO:0006123 mitochondrial electron transport, cytochrome c to oxygen;GO:0019646 aerobic electron transport chain;GO:0042773 ATP synthesis coupled electron transport		Transporters:Primary Active Transporters		Cholic Acid; N-Formylmethionine		(M5936)HALLMARK OXIDATIVE PHOSPHORYLATION	0.0	0.0	0.0	0.0	1.0	0.0	0.0	0.0	0.0	0.0	0.0	0.0	0.0	0.0	0.0	0.0	0.0	0.0	0.0	0.0
UBASH3B	84959	symbol	H. sapiens	84959	H. sapiens	UBASH3B	ubiquitin associated and SH3 domain containing B	GO:0090331 negative regulation of platelet aggregation;GO:0038063 collagen-activated tyrosine kinase receptor signaling pathway;GO:0034111 negative regulation of homotypic cell-cell adhesion		Enzymes; ENZYME proteins:Hydrolases; Predicted intracellular proteins	Cytosol (Approved); Additional: Nuclear bodies;Nucleoplasm				0.0	1.0	1.0	0.0	0.0	1.0	0.0	0.0	0.0	0.0	0.0	1.0	0.0	0.0	0.0	0.0	1.0	1.0	0.0	0.0
SNX27	81609	symbol	H. sapiens	81609	H. sapiens	SNX27	sorting nexin 27	GO:0001770 establishment of natural killer cell polarity;GO:0001767 establishment of lymphocyte polarity;GO:0008333 endosome to lysosome transport		Transporters; Predicted intracellular proteins	Vesicles (Approved)				0.0	0.0	0.0	0.0	0.0	0.0	0.0	0.0	0.0	0.0	1.0	0.0	0.0	0.0	0.0	0.0	0.0	1.0	0.0	0.0
KHDRBS3	10656	symbol	H. sapiens	10656	H. sapiens	KHDRBS3	KH RNA binding domain containing, signal transduction associated 3	GO:0000381 regulation of alternative mRNA splicing, via spliceosome;GO:0048024 regulation of mRNA splicing, via spliceosome;GO:0050684 regulation of mRNA processing		Predicted intracellular proteins	Nucleoplasm (Supported)				0.0	0.0	0.0	0.0	0.0	0.0	0.0	0.0	0.0	0.0	0.0	0.0	0.0	0.0	0.0	0.0	0.0	0.0	0.0	0.0
NEFL	4747	symbol	H. sapiens	4747	H. sapiens	NEFL	neurofilament light chain	GO:0045105 intermediate filament polymerization or depolymerization;GO:1903937 response to acrylamide;GO:0033693 neurofilament bundle assembly		Predicted intracellular proteins; Human disease related genes:Nervous system diseases:Neurodegenerative diseases; Disease related genes	Intermediate filaments;Nucleoplasm (Approved); Additional: Midbody				1.0	0.0	0.0	0.0	1.0	1.0	0.0	1.0	1.0	1.0	0.0	0.0	0.0	0.0	0.0	0.0	0.0	0.0	0.0	0.0
SH3BP4	23677	symbol	H. sapiens	23677	H. sapiens	SH3BP4	SH3 domain binding protein 4	GO:0034260 negative regulation of GTPase activity;GO:0061462 protein localization to lysosome;GO:0032007 negative regulation of TOR signaling		Predicted intracellular proteins					0.0	0.0	0.0	0.0	0.0	0.0	0.0	0.0	0.0	1.0	0.0	0.0	0.0	0.0	0.0	0.0	0.0	0.0	0.0	0.0
EPHA2	1969	symbol	H. sapiens	1969	H. sapiens	EPHA2	EPH receptor A2	GO:0060034 notochord cell differentiation;GO:0060035 notochord cell development;GO:0014028 notochord formation	Tyr protein kinase family	FDA approved drug targets:Small molecule drugs; Cancer-related genes:Mutated cancer genes; Cancer-related genes:Candidate cancer biomarkers; Human disease related genes:Nervous system diseases:Eye disease; Kinases:Tyr protein kinases; Disease related genes; Enzymes; RAS pathway related proteins; ENZYME proteins:Transferases	Cell Junctions;Plasma membrane (Supported); Additional: Golgi apparatus;Nuclear speckles	Dasatinib; Phosphoaminophosphonic Acid-Adenylate Ester; Regorafenib; Fostamatinib	(M273)PID EPHA2 FWD PATHWAY; (M177)PID EPHA FWDPATHWAY; (M86)PID ARF6 PATHWAY	(M5934)HALLMARK XENOBIOTIC METABOLISM; (M5939)HALLMARK P53 PATHWAY	0.0	1.0	1.0	0.0	0.0	1.0	1.0	1.0	0.0	0.0	0.0	1.0	1.0	0.0	1.0	1.0	1.0	0.0	0.0	1.0
PLEKHG4B	153478	symbol	H. sapiens	153478	H. sapiens	PLEKHG4B	pleckstrin homology and RhoGEF domain containing G4B	GO:0051056 regulation of small GTPase mediated signal transduction;GO:1902531 regulation of intracellular signal transduction;GO:0050790 regulation of catalytic activity		Predicted intracellular proteins	Nucleoplasm (Approved)				0.0	0.0	0.0	0.0	0.0	0.0	0.0	0.0	0.0	0.0	0.0	0.0	0.0	0.0	0.0	0.0	0.0	0.0	0.0	0.0
TM7SF2	7108	symbol	H. sapiens	7108	H. sapiens	TM7SF2	transmembrane 7 superfamily member 2	GO:0006695 cholesterol biosynthetic process;GO:1902653 secondary alcohol biosynthetic process;GO:0016126 sterol biosynthetic process		Enzymes; Predicted intracellular proteins; ENZYME proteins:Oxidoreductases	Endoplasmic reticulum (Supported); Additional: Vesicles			(M5892)HALLMARK CHOLESTEROL HOMEOSTASIS; (M5924)HALLMARK MTORC1 SIGNALING	0.0	0.0	0.0	0.0	0.0	0.0	0.0	0.0	0.0	0.0	0.0	0.0	0.0	0.0	0.0	0.0	0.0	0.0	0.0	0.0
TSPYL5	85453	symbol	H. sapiens	85453	H. sapiens	TSPYL5	TSPY like 5	GO:0071480 cellular response to gamma radiation;GO:0010332 response to gamma radiation;GO:0071479 cellular response to ionizing radiation		Predicted intracellular proteins	Cytosol (Approved); Additional: Golgi apparatus				0.0	0.0	0.0	0.0	0.0	0.0	0.0	0.0	0.0	0.0	0.0	1.0	0.0	0.0	0.0	0.0	0.0	0.0	0.0	0.0
CITED4	163732	symbol	H. sapiens	163732	H. sapiens	CITED4	Cbp/p300 interacting transactivator with Glu/Asp rich carboxy-terminal domain 4	GO:0043627 response to estrogen;GO:0009725 response to hormone;GO:0009719 response to endogenous stimulus		Predicted intracellular proteins	Vesicles (Approved)				0.0	0.0	0.0	0.0	0.0	0.0	0.0	0.0	0.0	0.0	0.0	0.0	0.0	0.0	0.0	0.0	0.0	0.0	0.0	0.0
TNFRSF10B	8795	symbol	H. sapiens	8795	H. sapiens	TNFRSF10B	TNF receptor superfamily member 10b	GO:0036462 TRAIL-activated apoptotic signaling pathway;GO:0007250 activation of NF-kappaB-inducing kinase activity;GO:0070059 intrinsic apoptotic signaling pathway in response to endoplasmic reticulum stress		Disease related genes; CD markers; Cancer-related genes:Candidate cancer biomarkers		HGS-TR2J; Lexatumumab	(M79)PID TRAIL PATHWAY; (M145)PID P53 DOWNSTREAM PATHWAY		0.0	1.0	1.0	0.0	0.0	0.0	0.0	0.0	0.0	0.0	0.0	0.0	0.0	0.0	0.0	0.0	0.0	0.0	1.0	0.0
SNHG8	100093630	symbol	H. sapiens	100093630	H. sapiens	SNHG8	small nucleolar RNA host gene 8								0.0	0.0	0.0	0.0	0.0	0.0	0.0	0.0	0.0	0.0	0.0	0.0	0.0	0.0	0.0	0.0	0.0	0.0	0.0	0.0
MTCL1	23255	symbol	H. sapiens	23255	H. sapiens	MTCL1	microtubule crosslinking factor 1	GO:0090314 positive regulation of protein targeting to membrane;GO:0090313 regulation of protein targeting to membrane;GO:0045197 establishment or maintenance of epithelial cell apical/basal polarity		Predicted intracellular proteins					0.0	0.0	0.0	0.0	0.0	0.0	0.0	0.0	0.0	0.0	1.0	0.0	0.0	0.0	0.0	0.0	1.0	0.0	0.0	0.0
RPL13AP20	387841	symbol	H. sapiens	387841	H. sapiens	RPL13AP20	ribosomal protein L13a pseudogene 20								0.0	0.0	0.0	0.0	0.0	0.0	0.0	0.0	0.0	0.0	0.0	0.0	0.0	0.0	0.0	0.0	0.0	0.0	0.0	0.0
SUSD5	26032	symbol	H. sapiens	26032	H. sapiens	SUSD5	sushi domain containing 5	GO:0007219 Notch signaling pathway;GO:0007155 cell adhesion;GO:0022610 biological adhesion		Predicted intracellular proteins	Golgi apparatus;Vesicles (Uncertain)				0.0	0.0	0.0	0.0	0.0	0.0	0.0	0.0	0.0	0.0	0.0	0.0	0.0	0.0	0.0	0.0	0.0	0.0	0.0	0.0
TRAPPC2	6399	symbol	H. sapiens	6399	H. sapiens	TRAPPC2	trafficking protein particle complex subunit 2	GO:0006888 endoplasmic reticulum to Golgi vesicle-mediated transport;GO:0048193 Golgi vesicle transport;GO:0001501 skeletal system development		Human disease related genes:Congenital malformations:Congenital malformations of the musculoskeletal system; Predicted intracellular proteins; Disease related genes	Endoplasmic reticulum;Vesicles (Approved); Additional: Nucleoplasm				0.0	1.0	0.0	0.0	0.0	0.0	0.0	0.0	0.0	0.0	0.0	0.0	0.0	0.0	0.0	0.0	0.0	0.0	0.0	0.0
AMOTL2	51421	symbol	H. sapiens	51421	H. sapiens	AMOTL2	angiomotin like 2	GO:0003365 establishment of cell polarity involved in ameboidal cell migration;GO:0035329 hippo signaling;GO:0030010 establishment of cell polarity		Predicted intracellular proteins	Cell Junctions (Approved)				0.0	0.0	0.0	1.0	0.0	0.0	1.0	0.0	0.0	0.0	1.0	0.0	0.0	0.0	0.0	0.0	0.0	0.0	0.0	0.0
LOC102723854	102723854	Gene_ID	H. sapiens	102723854	H. sapiens	LINC01819	long intergenic non-protein coding RNA 1819								0.0	0.0	0.0	0.0	0.0	0.0	0.0	0.0	0.0	0.0	0.0	0.0	0.0	0.0	0.0	0.0	0.0	0.0	0.0	0.0
ELAVL2	1993	symbol	H. sapiens	1993	H. sapiens	ELAVL2	ELAV like RNA binding protein 2	GO:0006355 regulation of transcription, DNA-templated;GO:1903506 regulation of nucleic acid-templated transcription;GO:2001141 regulation of RNA biosynthetic process		Predicted intracellular proteins	Nucleoplasm (Approved); Additional: Cytosol				0.0	0.0	0.0	0.0	0.0	0.0	0.0	0.0	0.0	0.0	0.0	0.0	0.0	0.0	0.0	0.0	0.0	0.0	0.0	0.0
CC2D1A	54862	symbol	H. sapiens	54862	H. sapiens	CC2D1A	coiled-coil and C2 domain containing 1A	GO:1905381 negative regulation of snRNA transcription by RNA polymerase II;GO:1905380 regulation of snRNA transcription by RNA polymerase II;GO:0043123 positive regulation of I-kappaB kinase/NF-kappaB signaling		Predicted intracellular proteins; Human disease related genes:Other diseases:Mental and behavioural disorders; Disease related genes	Cytosol;Plasma membrane (Approved); Additional: Nucleoli fibrillar center				0.0	0.0	0.0	0.0	0.0	0.0	0.0	0.0	0.0	0.0	0.0	0.0	0.0	0.0	0.0	0.0	0.0	0.0	0.0	0.0
ACTB	60	symbol	H. sapiens	60	H. sapiens	ACTB	actin beta	GO:0051623 positive regulation of norepinephrine uptake;GO:0072749 cellular response to cytochalasin B;GO:1901328 response to cytochalasin B		Human disease related genes:Immune system diseases:Primary immunodeficiency; Human disease related genes:Congenital malformations:Other congenital malformations; Predicted intracellular proteins; Disease related genes		Quercetin; Phenethyl Isothiocyanate	(M5493)WNT SIGNALING	(M5915)HALLMARK APICAL JUNCTION	1.0	1.0	1.0	1.0	1.0	0.0	0.0	1.0	0.0	1.0	1.0	1.0	1.0	1.0	0.0	0.0	1.0	1.0	1.0	0.0
NDUFB8	4714	symbol	H. sapiens	4714	H. sapiens	NDUFB8	NADH:ubiquinone oxidoreductase subunit B8	GO:0006120 mitochondrial electron transport, NADH to ubiquinone;GO:0010257 NADH dehydrogenase complex assembly;GO:0032981 mitochondrial respiratory chain complex I assembly		Disease related genes; Human disease related genes:Congenital disorders of metabolism:Mitochondrial diseases	Mitochondria (Enhanced)	NADH		(M5936)HALLMARK OXIDATIVE PHOSPHORYLATION	0.0	0.0	0.0	0.0	1.0	0.0	0.0	0.0	0.0	0.0	0.0	0.0	0.0	0.0	0.0	0.0	0.0	0.0	0.0	0.0
TNNC1	7134	symbol	H. sapiens	7134	H. sapiens	TNNC1	troponin C1, slow skeletal and cardiac type	GO:0002086 diaphragm contraction;GO:0032972 regulation of muscle filament sliding speed;GO:0003011 involuntary skeletal muscle contraction		Predicted intracellular proteins; FDA approved drug targets:Small molecule drugs; Human disease related genes:Cardiovascular diseases:Cardiac diseases; Disease related genes	Actin filaments;Mitochondria;Nucleoplasm (Approved)	Trifluoperazine; Levosimendan; Felodipine; Bepridil; Calcium; Aluminium monostearate; 5-[1-(3,4-Dimethoxy-Benzoyl)-1,2,3,4-Tetrahydro-Quinolin-6-Yl]-6-Methyl-3,6-Dihydro-[1,3,4]Thiadiazin-2-One; N-(6-Aminohexyl)-5-Chloro-1-Naphthalenesulfonamide		(M5907)HALLMARK ESTROGEN RESPONSE LATE; (M5909)HALLMARK MYOGENESIS	0.0	1.0	0.0	0.0	0.0	0.0	0.0	0.0	1.0	0.0	0.0	0.0	0.0	1.0	0.0	1.0	1.0	0.0	0.0	0.0
SKP2	6502	symbol	H. sapiens	6502	H. sapiens	SKP2	S-phase kinase associated protein 2	GO:0033148 positive regulation of intracellular estrogen receptor signaling pathway;GO:0033145 positive regulation of intracellular steroid hormone receptor signaling pathway;GO:1902916 positive regulation of protein polyubiquitination		Predicted intracellular proteins; Cancer-related genes:Candidate cancer biomarkers	Cytosol;Nucleoplasm (Supported)		(M139)PID MYC PATHWAY; (M176)PID FOXM1 PATHWAY; (M136)PID FOXO PATHWAY	(M5895)HALLMARK WNT BETA CATENIN SIGNALING	0.0	0.0	0.0	1.0	0.0	0.0	0.0	0.0	0.0	0.0	0.0	0.0	0.0	0.0	0.0	0.0	0.0	0.0	0.0	0.0
KCNN2	3781	symbol	H. sapiens	3781	H. sapiens	KCNN2	potassium calcium-activated channel subfamily N member 2	GO:0098914 membrane repolarization during atrial cardiac muscle cell action potential;GO:0099624 atrial cardiac muscle cell membrane repolarization;GO:0086014 atrial cardiac muscle cell action potential		Voltage-gated ion channels:Calcium-Activated Potassium Channels; FDA approved drug targets:Small molecule drugs; Transporters:Transporter channels and pores	Nucleoplasm;Plasma membrane (Uncertain)				0.0	0.0	0.0	0.0	0.0	0.0	0.0	0.0	0.0	0.0	0.0	0.0	0.0	0.0	0.0	0.0	0.0	0.0	0.0	0.0

## Sheet: Enrichment
GroupID	Category	Term	Description	LogP	Log(q-value)	InTerm_InList	Genes	Symbols
1_Summary	GO Biological Processes	GO:0007420	brain development	-9.5277	-5.20249	22/742	60,357,558,652,1952,2296,2539,2637,4155,4747,4826,4915,7157,7474,7482,9355,9915,23224,23236,55506,55553,388585	ACTB,SHROOM2,AXL,BMP4,CELSR2,FOXC1,G6PD,GBX2,MBP,NEFL,NNAT,NTRK2,TP53,WNT5A,WNT2B,LHX2,ARNT2,SYNE2,PLCB1,MACROH2A2,SOX6,HES5
1_Member	GO Biological Processes	GO:0007420	brain development	-9.5277	-5.20249	22/742	60,357,558,652,1952,2296,2539,2637,4155,4747,4826,4915,7157,7474,7482,9355,9915,23224,23236,55506,55553,388585	ACTB,SHROOM2,AXL,BMP4,CELSR2,FOXC1,G6PD,GBX2,MBP,NEFL,NNAT,NTRK2,TP53,WNT5A,WNT2B,LHX2,ARNT2,SYNE2,PLCB1,MACROH2A2,SOX6,HES5
1_Member	GO Biological Processes	GO:0060322	head development	-9.05184	-5.18228	22/787	60,357,558,652,1952,2296,2539,2637,4155,4747,4826,4915,7157,7474,7482,9355,9915,23224,23236,55506,55553,388585	ACTB,SHROOM2,AXL,BMP4,CELSR2,FOXC1,G6PD,GBX2,MBP,NEFL,NNAT,NTRK2,TP53,WNT5A,WNT2B,LHX2,ARNT2,SYNE2,PLCB1,MACROH2A2,SOX6,HES5
1_Member	GO Biological Processes	GO:0030900	forebrain development	-4.95652	-2.56888	11/375	558,652,2637,4747,4915,7474,7482,9355,23224,23236,388585	AXL,BMP4,GBX2,NEFL,NTRK2,WNT5A,WNT2B,LHX2,SYNE2,PLCB1,HES5
1_Member	GO Biological Processes	GO:0021537	telencephalon development	-4.0422	-1.86011	8/247	652,4747,4915,7474,9355,23224,23236,388585	BMP4,NEFL,NTRK2,WNT5A,LHX2,SYNE2,PLCB1,HES5
1_Member	GO Biological Processes	GO:0021987	cerebral cortex development	-3.33426	-1.33986	5/112	4747,4915,9355,23224,23236	NEFL,NTRK2,LHX2,SYNE2,PLCB1
1_Member	GO Biological Processes	GO:0021543	pallium development	-2.54009	-0.8076	5/169	4747,4915,9355,23224,23236	NEFL,NTRK2,LHX2,SYNE2,PLCB1
2_Summary	GO Biological Processes	GO:0001501	skeletal system development	-9.24815	-5.20249	18/495	257,652,1969,2260,2296,4488,6399,6664,7042,7092,7157,7474,7482,23508,55553,56243,60529,388585,60,2535,2637,3675,7134,7414,8463,9355,23616,51301,9394,9915,57679,3899,10586,357,4915,5158,1001,5521,8994,4155,222663,1952,9636,2353,3728,23598,23236,274,970,2319,57091,84959,57471,1907,1788,4217,4293,8795,440275,146691,558,1081,23224,5774,9052	ALX3,BMP4,EPHA2,FGFR1,FOXC1,MSX2,TRAPPC2,SOX11,TGFB2,TLL1,TP53,WNT5A,WNT2B,TTC9,SOX6,KIAA1217,ALX4,HES5,ACTB,FZD2,GBX2,ITGA3,TNNC1,VCL,TEAD2,LHX2,SH3BP1,GCNT4,HS6ST1,ARNT2,ALS2,AFF3,MAB21L2,SHROOM2,NTRK2,PDE6B,CDH3,PPP2R2B,LIMD1,MBP,SCUBE3,CELSR2,ISG15,FOS,JUP,PATZ1,PLCB1,BIN1,CD70,FLOT2,CASS4,UBASH3B,ERMN,EDN2,DNMT3A,MAP3K5,MAP3K9,TNFRSF10B,EIF2AK4,TOM1L2,AXL,CGA,SYNE2,PTPN3,GPRC5A
2_Member	GO Biological Processes	GO:0001501	skeletal system development	-9.24815	-5.20249	18/495	257,652,1969,2260,2296,4488,6399,6664,7042,7092,7157,7474,7482,23508,55553,56243,60529,388585	ALX3,BMP4,EPHA2,FGFR1,FOXC1,MSX2,TRAPPC2,SOX11,TGFB2,TLL1,TP53,WNT5A,WNT2B,TTC9,SOX6,KIAA1217,ALX4,HES5
2_Member	GO Biological Processes	GO:0048729	tissue morphogenesis	-8.47837	-4.76159	18/554	60,652,1969,2296,2535,2637,3675,4488,6664,7042,7134,7414,7474,8463,9355,23616,51301,388585	ACTB,BMP4,EPHA2,FOXC1,FZD2,GBX2,ITGA3,MSX2,SOX11,TGFB2,TNNC1,VCL,WNT5A,TEAD2,LHX2,SH3BP1,GCNT4,HES5
2_Member	GO Biological Processes	GO:0043009	chordate embryonic development	-8.4093	-4.76159	19/629	257,652,1969,2260,2296,2535,2637,6664,7042,7157,7474,8463,9355,9394,9915,56243,57679,60529,388585	ALX3,BMP4,EPHA2,FGFR1,FOXC1,FZD2,GBX2,SOX11,TGFB2,TP53,WNT5A,TEAD2,LHX2,HS6ST1,ARNT2,KIAA1217,ALS2,ALX4,HES5
2_Member	GO Biological Processes	GO:0048598	embryonic morphogenesis	-8.21595	-4.72997	18/576	257,652,1969,2296,2535,2637,3675,3899,4488,6664,7042,7157,7474,8463,9355,10586,60529,388585	ALX3,BMP4,EPHA2,FOXC1,FZD2,GBX2,ITGA3,AFF3,MSX2,SOX11,TGFB2,TP53,WNT5A,TEAD2,LHX2,MAB21L2,ALX4,HES5
2_Member	GO Biological Processes	GO:0009792	embryo development ending in birth or egg hatching	-8.17891	-4.72997	19/650	257,652,1969,2260,2296,2535,2637,6664,7042,7157,7474,8463,9355,9394,9915,56243,57679,60529,388585	ALX3,BMP4,EPHA2,FGFR1,FOXC1,FZD2,GBX2,SOX11,TGFB2,TP53,WNT5A,TEAD2,LHX2,HS6ST1,ARNT2,KIAA1217,ALS2,ALX4,HES5
2_Member	GO Biological Processes	GO:0021915	neural tube development	-7.7628	-4.37036	10/151	652,1969,2535,2637,6664,7042,7474,8463,9355,388585	BMP4,EPHA2,FZD2,GBX2,SOX11,TGFB2,WNT5A,TEAD2,LHX2,HES5
2_Member	GO Biological Processes	GO:0043010	camera-type eye development	-7.40132	-4.05464	13/318	357,652,1969,2296,4915,5158,6664,7042,7474,7482,9355,10586,388585	SHROOM2,BMP4,EPHA2,FOXC1,NTRK2,PDE6B,SOX11,TGFB2,WNT5A,WNT2B,LHX2,MAB21L2,HES5
2_Member	GO Biological Processes	GO:0003206	cardiac chamber morphogenesis	-7.32416	-4.01887	9/126	652,2296,2535,4488,6664,7042,7134,7157,7474	BMP4,FOXC1,FZD2,MSX2,SOX11,TGFB2,TNNC1,TP53,WNT5A
2_Member	GO Biological Processes	GO:0048819	regulation of hair follicle maturation	-6.90302	-3.70247	4/9	1001,4488,7042,7474	CDH3,MSX2,TGFB2,WNT5A
2_Member	GO Biological Processes	GO:0060411	cardiac septum morphogenesis	-6.77502	-3.60442	7/71	652,2535,4488,6664,7042,7157,7474	BMP4,FZD2,MSX2,SOX11,TGFB2,TP53,WNT5A
2_Member	GO Biological Processes	GO:0001654	eye development	-6.72275	-3.58045	13/364	357,652,1969,2296,4915,5158,6664,7042,7474,7482,9355,10586,388585	SHROOM2,BMP4,EPHA2,FOXC1,NTRK2,PDE6B,SOX11,TGFB2,WNT5A,WNT2B,LHX2,MAB21L2,HES5
2_Member	GO Biological Processes	GO:0150063	visual system development	-6.66853	-3.57712	13/368	357,652,1969,2296,4915,5158,6664,7042,7474,7482,9355,10586,388585	SHROOM2,BMP4,EPHA2,FOXC1,NTRK2,PDE6B,SOX11,TGFB2,WNT5A,WNT2B,LHX2,MAB21L2,HES5
2_Member	GO Biological Processes	GO:0048880	sensory system development	-6.5885	-3.52951	13/374	357,652,1969,2296,4915,5158,6664,7042,7474,7482,9355,10586,388585	SHROOM2,BMP4,EPHA2,FOXC1,NTRK2,PDE6B,SOX11,TGFB2,WNT5A,WNT2B,LHX2,MAB21L2,HES5
2_Member	GO Biological Processes	GO:0002009	morphogenesis of an epithelium	-6.55397	-3.52951	14/443	60,652,1969,2535,2637,4488,6664,7042,7414,7474,8463,9355,23616,388585	ACTB,BMP4,EPHA2,FZD2,GBX2,MSX2,SOX11,TGFB2,VCL,WNT5A,TEAD2,LHX2,SH3BP1,HES5
2_Member	KEGG Pathway	hsa04390	Hippo signaling pathway	-6.50422	-3.49995	9/157	60,652,2535,5521,7042,7474,7482,8463,8994	ACTB,BMP4,FZD2,PPP2R2B,TGFB2,WNT5A,WNT2B,TEAD2,LIMD1
2_Member	GO Biological Processes	GO:0035116	embryonic hindlimb morphogenesis	-6.30212	-3.37823	5/28	257,652,3899,4488,60529	ALX3,BMP4,AFF3,MSX2,ALX4
2_Member	GO Biological Processes	GO:0001838	embryonic epithelial tube formation	-6.28396	-3.37823	8/122	652,2535,6664,7042,7474,8463,9355,388585	BMP4,FZD2,SOX11,TGFB2,WNT5A,TEAD2,LHX2,HES5
2_Member	GO Biological Processes	GO:0003205	cardiac chamber development	-6.27776	-3.37823	9/167	652,2296,2535,4488,6664,7042,7134,7157,7474	BMP4,FOXC1,FZD2,MSX2,SOX11,TGFB2,TNNC1,TP53,WNT5A
2_Member	GO Biological Processes	GO:0007423	sensory organ development	-6.16407	-3.27978	15/551	357,652,1969,2296,2535,2637,4915,5158,6664,7042,7474,7482,9355,10586,388585	SHROOM2,BMP4,EPHA2,FOXC1,FZD2,GBX2,NTRK2,PDE6B,SOX11,TGFB2,WNT5A,WNT2B,LHX2,MAB21L2,HES5
2_Member	GO Biological Processes	GO:0051794	regulation of timing of catagen	-6.14124	-3.27168	3/4	1001,4488,7042	CDH3,MSX2,TGFB2
2_Member	GO Biological Processes	GO:0072175	epithelial tube formation	-6.07364	-3.23211	8/130	652,2535,6664,7042,7474,8463,9355,388585	BMP4,FZD2,SOX11,TGFB2,WNT5A,TEAD2,LHX2,HES5
2_Member	GO Biological Processes	GO:0035137	hindlimb morphogenesis	-5.79719	-3.07338	5/35	257,652,3899,4488,60529	ALX3,BMP4,AFF3,MSX2,ALX4
2_Member	GO Biological Processes	GO:0035107	appendage morphogenesis	-5.78378	-3.07338	8/142	257,652,3899,4488,6664,7042,7474,60529	ALX3,BMP4,AFF3,MSX2,SOX11,TGFB2,WNT5A,ALX4
2_Member	GO Biological Processes	GO:0035108	limb morphogenesis	-5.78378	-3.07338	8/142	257,652,3899,4488,6664,7042,7474,60529	ALX3,BMP4,AFF3,MSX2,SOX11,TGFB2,WNT5A,ALX4
2_Member	GO Biological Processes	GO:0060562	epithelial tube morphogenesis	-5.78249	-3.07338	11/307	652,1969,2535,2637,4488,6664,7042,7474,8463,9355,388585	BMP4,EPHA2,FZD2,GBX2,MSX2,SOX11,TGFB2,WNT5A,TEAD2,LHX2,HES5
2_Member	GO Biological Processes	GO:0016331	morphogenesis of embryonic epithelium	-5.76087	-3.07338	8/143	652,2535,6664,7042,7474,8463,9355,388585	BMP4,FZD2,SOX11,TGFB2,WNT5A,TEAD2,LHX2,HES5
2_Member	GO Biological Processes	GO:0048818	positive regulation of hair follicle maturation	-5.74513	-3.07338	3/5	4488,7042,7474	MSX2,TGFB2,WNT5A
2_Member	GO Biological Processes	GO:0048568	embryonic organ development	-5.73292	-3.07338	13/446	257,652,1969,2296,2535,2637,6664,7042,7157,7474,8463,9394,60529	ALX3,BMP4,EPHA2,FOXC1,FZD2,GBX2,SOX11,TGFB2,TP53,WNT5A,TEAD2,HS6ST1,ALX4
2_Member	GO Biological Processes	GO:0003007	heart morphogenesis	-5.72975	-3.07338	10/250	652,2296,2535,4488,6664,7042,7134,7157,7474,8463	BMP4,FOXC1,FZD2,MSX2,SOX11,TGFB2,TNNC1,TP53,WNT5A,TEAD2
2_Member	WikiPathways	WP2064	Neural crest differentiation	-5.69669	-3.07338	7/102	652,2260,2637,4155,4488,9355,388585	BMP4,FGFR1,GBX2,MBP,MSX2,LHX2,HES5
2_Member	GO Biological Processes	GO:0035148	tube formation	-5.6932	-3.07338	8/146	652,2535,6664,7042,7474,8463,9355,388585	BMP4,FZD2,SOX11,TGFB2,WNT5A,TEAD2,LHX2,HES5
2_Member	GO Biological Processes	GO:0001841	neural tube formation	-5.6682	-3.06187	7/103	652,2535,6664,7042,7474,8463,9355	BMP4,FZD2,SOX11,TGFB2,WNT5A,TEAD2,LHX2
2_Member	GO Biological Processes	GO:0030510	regulation of BMP signaling pathway	-5.61211	-3.01362	7/105	652,3675,4488,6664,7474,222663,388585	BMP4,ITGA3,MSX2,SOX11,WNT5A,SCUBE3,HES5
2_Member	GO Biological Processes	GO:0003279	cardiac septum development	-5.58451	-2.9937	7/106	652,2535,4488,6664,7042,7157,7474	BMP4,FZD2,MSX2,SOX11,TGFB2,TP53,WNT5A
2_Member	GO Biological Processes	GO:0030513	positive regulation of BMP signaling pathway	-5.50035	-2.91709	5/40	652,4488,6664,222663,388585	BMP4,MSX2,SOX11,SCUBE3,HES5
2_Member	GO Biological Processes	GO:0003002	regionalization	-5.45555	-2.89165	11/332	652,1952,2296,2637,4488,7157,7474,7482,9355,60529,388585	BMP4,CELSR2,FOXC1,GBX2,MSX2,TP53,WNT5A,WNT2B,LHX2,ALX4,HES5
2_Member	GO Biological Processes	GO:0009952	anterior/posterior pattern specification	-5.45301	-2.89165	9/210	652,1952,2296,2637,4488,7157,7474,60529,388585	BMP4,CELSR2,FOXC1,GBX2,MSX2,TP53,WNT5A,ALX4,HES5
2_Member	GO Biological Processes	GO:0051797	regulation of hair follicle development	-5.43435	-2.88005	4/19	1001,4488,7042,7474	CDH3,MSX2,TGFB2,WNT5A
2_Member	GO Biological Processes	GO:0060412	ventricular septum morphogenesis	-5.39282	-2.84547	5/42	652,2535,6664,7042,7474	BMP4,FZD2,SOX11,TGFB2,WNT5A
2_Member	GO Biological Processes	GO:0003151	outflow tract morphogenesis	-5.30939	-2.78878	6/76	652,2535,4488,6664,7042,7474	BMP4,FZD2,MSX2,SOX11,TGFB2,WNT5A
2_Member	GO Biological Processes	GO:0030326	embryonic limb morphogenesis	-5.24995	-2.76281	7/119	257,652,3899,4488,7042,7474,60529	ALX3,BMP4,AFF3,MSX2,TGFB2,WNT5A,ALX4
2_Member	GO Biological Processes	GO:0035113	embryonic appendage morphogenesis	-5.24995	-2.76281	7/119	257,652,3899,4488,7042,7474,60529	ALX3,BMP4,AFF3,MSX2,TGFB2,WNT5A,ALX4
2_Member	GO Biological Processes	GO:0002088	lens development in camera-type eye	-5.24348	-2.76281	6/78	357,652,1969,6664,7474,7482	SHROOM2,BMP4,EPHA2,SOX11,WNT5A,WNT2B
2_Member	GO Biological Processes	GO:0048762	mesenchymal cell differentiation	-5.24026	-2.76281	8/168	652,2260,2296,2637,4488,6664,7042,7474	BMP4,FGFR1,FOXC1,GBX2,MSX2,SOX11,TGFB2,WNT5A
2_Member	GO Biological Processes	GO:0048593	camera-type eye morphogenesis	-5.17852	-2.70689	7/122	357,652,1969,4915,6664,7474,7482	SHROOM2,BMP4,EPHA2,NTRK2,SOX11,WNT5A,WNT2B
2_Member	GO Biological Processes	GO:0002089	lens morphogenesis in camera-type eye	-5.16431	-2.69844	4/22	357,652,1969,6664	SHROOM2,BMP4,EPHA2,SOX11
2_Member	GO Biological Processes	GO:0007498	mesoderm development	-5.15514	-2.69494	7/123	652,1969,2296,3675,7474,8463,9355	BMP4,EPHA2,FOXC1,ITGA3,WNT5A,TEAD2,LHX2
2_Member	GO Biological Processes	GO:0060485	mesenchyme development	-5.13287	-2.67828	9/230	652,2260,2296,2637,4488,6664,7042,7474,8463	BMP4,FGFR1,FOXC1,GBX2,MSX2,SOX11,TGFB2,WNT5A,TEAD2
2_Member	GO Biological Processes	GO:0003231	cardiac ventricle development	-5.08626	-2.64266	7/126	652,2296,2535,6664,7042,7134,7474	BMP4,FOXC1,FZD2,SOX11,TGFB2,TNNC1,WNT5A
2_Member	GO Biological Processes	GO:0048736	appendage development	-5.07396	-2.64109	8/177	257,652,3899,4488,6664,7042,7474,60529	ALX3,BMP4,AFF3,MSX2,SOX11,TGFB2,WNT5A,ALX4
2_Member	GO Biological Processes	GO:0060173	limb development	-5.07396	-2.64109	8/177	257,652,3899,4488,6664,7042,7474,60529	ALX3,BMP4,AFF3,MSX2,SOX11,TGFB2,WNT5A,ALX4
2_Member	GO Biological Processes	GO:0007389	pattern specification process	-5.01127	-2.6041	12/443	257,652,1952,2296,2637,4488,7157,7474,7482,9355,60529,388585	ALX3,BMP4,CELSR2,FOXC1,GBX2,MSX2,TP53,WNT5A,WNT2B,LHX2,ALX4,HES5
2_Member	GO Biological Processes	GO:0045778	positive regulation of ossification	-4.96965	-2.57721	5/51	652,6664,7042,7474,9636	BMP4,SOX11,TGFB2,WNT5A,ISG15
2_Member	GO Biological Processes	GO:0001843	neural tube closure	-4.91133	-2.52843	6/89	652,2535,7042,7474,8463,9355	BMP4,FZD2,TGFB2,WNT5A,TEAD2,LHX2
2_Member	GO Biological Processes	GO:0060606	tube closure	-4.88341	-2.5052	6/90	652,2535,7042,7474,8463,9355	BMP4,FZD2,TGFB2,WNT5A,TEAD2,LHX2
2_Member	GO Biological Processes	GO:0062009	secondary palate development	-4.86161	-2.48805	4/26	2535,6664,7042,7474	FZD2,SOX11,TGFB2,WNT5A
2_Member	GO Biological Processes	GO:0014020	primary neural tube formation	-4.74874	-2.38883	6/95	652,2535,7042,7474,8463,9355	BMP4,FZD2,TGFB2,WNT5A,TEAD2,LHX2
2_Member	GO Biological Processes	GO:0042634	regulation of hair cycle	-4.72888	-2.37783	4/28	1001,4488,7042,7474	CDH3,MSX2,TGFB2,WNT5A
2_Member	GO Biological Processes	GO:0090596	sensory organ morphogenesis	-4.69556	-2.35536	9/261	357,652,1969,2535,2637,4915,6664,7474,7482	SHROOM2,BMP4,EPHA2,FZD2,GBX2,NTRK2,SOX11,WNT5A,WNT2B
2_Member	GO Biological Processes	GO:0090092	regulation of transmembrane receptor protein serine/threonine kinase signaling pathway	-4.61795	-2.30065	9/267	652,3675,4488,6664,7042,7157,7474,222663,388585	BMP4,ITGA3,MSX2,SOX11,TGFB2,TP53,WNT5A,SCUBE3,HES5
2_Member	GO Biological Processes	GO:0048592	eye morphogenesis	-4.59385	-2.28459	7/150	357,652,1969,4915,6664,7474,7482	SHROOM2,BMP4,EPHA2,NTRK2,SOX11,WNT5A,WNT2B
2_Member	GO Biological Processes	GO:0070243	regulation of thymocyte apoptotic process	-4.53859	-2.24112	3/11	652,7157,7474	BMP4,TP53,WNT5A
2_Member	GO Biological Processes	GO:0051798	positive regulation of hair follicle development	-4.41547	-2.14434	3/12	4488,7042,7474	MSX2,TGFB2,WNT5A
2_Member	GO Biological Processes	GO:0007517	muscle organ development	-4.39698	-2.12948	9/285	2296,2353,2535,6664,7042,7134,7474,55553,60529	FOXC1,FOS,FZD2,SOX11,TGFB2,TNNC1,WNT5A,SOX6,ALX4
2_Member	GO Biological Processes	GO:0001707	mesoderm formation	-4.3564	-2.09608	5/68	652,1969,2296,3675,7474	BMP4,EPHA2,FOXC1,ITGA3,WNT5A
2_Member	GO Biological Processes	GO:0010632	regulation of epithelial cell migration	-4.33854	-2.08175	9/290	652,1969,2260,3675,3728,7042,7474,23598,23616	BMP4,EPHA2,FGFR1,ITGA3,JUP,TGFB2,WNT5A,PATZ1,SH3BP1
2_Member	GO Biological Processes	GO:0048705	skeletal system morphogenesis	-4.3254	-2.07562	8/225	257,652,2260,2296,4488,6664,55553,60529	ALX3,BMP4,FGFR1,FOXC1,MSX2,SOX11,SOX6,ALX4
2_Member	GO Biological Processes	GO:0048562	embryonic organ morphogenesis	-4.31549	-2.06918	9/292	257,652,1969,2535,2637,6664,7474,8463,60529	ALX3,BMP4,EPHA2,FZD2,GBX2,SOX11,WNT5A,TEAD2,ALX4
2_Member	GO Biological Processes	GO:0048332	mesoderm morphogenesis	-4.29553	-2.05265	5/70	652,1969,2296,3675,7474	BMP4,EPHA2,FOXC1,ITGA3,WNT5A
2_Member	GO Biological Processes	GO:0003281	ventricular septum development	-4.20772	-1.98488	5/73	652,2535,6664,7042,7474	BMP4,FZD2,SOX11,TGFB2,WNT5A
2_Member	GO Biological Processes	GO:0090100	positive regulation of transmembrane receptor protein serine/threonine kinase signaling pathway	-4.17607	-1.96292	6/120	652,4488,6664,7042,222663,388585	BMP4,MSX2,SOX11,TGFB2,SCUBE3,HES5
2_Member	GO Biological Processes	GO:0090287	regulation of cellular response to growth factor stimulus	-4.07392	-1.87952	9/314	652,2260,3675,4488,6664,7157,7474,222663,388585	BMP4,FGFR1,ITGA3,MSX2,SOX11,TP53,WNT5A,SCUBE3,HES5
2_Member	GO Biological Processes	GO:0060443	mammary gland morphogenesis	-4.05968	-1.87136	4/41	652,1969,4488,7474	BMP4,EPHA2,MSX2,WNT5A
2_Member	GO Biological Processes	GO:0048706	embryonic skeletal system development	-4.03948	-1.86011	6/127	257,652,6664,7474,56243,60529	ALX3,BMP4,SOX11,WNT5A,KIAA1217,ALX4
2_Member	GO Biological Processes	GO:0045836	positive regulation of meiotic nuclear division	-4.01699	-1.85215	3/16	4488,7474,23236	MSX2,WNT5A,PLCB1
2_Member	GO Biological Processes	GO:0061061	muscle structure development	-3.9855	-1.82351	11/480	274,652,2296,2353,2535,6664,7042,7134,7474,55553,60529	BIN1,BMP4,FOXC1,FOS,FZD2,SOX11,TGFB2,TNNC1,WNT5A,SOX6,ALX4
2_Member	GO Biological Processes	GO:0048339	paraxial mesoderm development	-3.93449	-1.78093	3/17	2296,7474,8463	FOXC1,WNT5A,TEAD2
2_Member	WikiPathways	WP2840	Hair follicle development: cytodifferentiation - part 3 of 3	-3.79809	-1.66625	5/89	652,2353,4488,7474,9355	BMP4,FOS,MSX2,WNT5A,LHX2
2_Member	GO Biological Processes	GO:0060021	roof of mouth development	-3.7527	-1.63132	5/91	2535,6664,7042,7474,60529	FZD2,SOX11,TGFB2,WNT5A,ALX4
2_Member	GO Biological Processes	GO:2000678	negative regulation of transcription regulatory region DNA binding	-3.71555	-1.60892	3/20	4488,6664,9355	MSX2,SOX11,LHX2
2_Member	GO Biological Processes	GO:0072132	mesenchyme morphogenesis	-3.68663	-1.59036	4/51	2296,4488,7042,7474	FOXC1,MSX2,TGFB2,WNT5A
2_Member	GO Biological Processes	GO:2000677	regulation of transcription regulatory region DNA binding	-3.65379	-1.56478	4/52	2296,4488,6664,9355	FOXC1,MSX2,SOX11,LHX2
2_Member	GO Biological Processes	GO:0014706	striated muscle tissue development	-3.59693	-1.51655	8/287	652,2296,2353,4488,6664,7042,7134,7474	BMP4,FOXC1,FOS,MSX2,SOX11,TGFB2,TNNC1,WNT5A
2_Member	GO Biological Processes	GO:0043583	ear development	-3.59013	-1.51655	7/217	357,652,2535,2637,7042,7474,388585	SHROOM2,BMP4,FZD2,GBX2,TGFB2,WNT5A,HES5
2_Member	GO Biological Processes	GO:0060444	branching involved in mammary gland duct morphogenesis	-3.58857	-1.51655	3/22	1969,4488,7474	EPHA2,MSX2,WNT5A
2_Member	GO Biological Processes	GO:0001822	kidney development	-3.58678	-1.51655	8/288	652,2296,3675,6664,7042,7474,51301,388585	BMP4,FOXC1,ITGA3,SOX11,TGFB2,WNT5A,GCNT4,HES5
2_Member	GO Biological Processes	GO:0035282	segmentation	-3.58163	-1.51598	5/99	652,2296,7157,7474,388585	BMP4,FOXC1,TP53,WNT5A,HES5
2_Member	GO Biological Processes	GO:0022612	gland morphogenesis	-3.54128	-1.48015	5/101	652,1969,4488,7042,7474	BMP4,EPHA2,MSX2,TGFB2,WNT5A
2_Member	GO Biological Processes	GO:0007507	heart development	-3.53055	-1.47967	11/542	652,2296,2535,3675,4488,6664,7042,7134,7157,7474,8463	BMP4,FOXC1,FZD2,ITGA3,MSX2,SOX11,TGFB2,TNNC1,TP53,WNT5A,TEAD2
2_Member	GO Biological Processes	GO:0072001	renal system development	-3.49726	-1.45161	8/297	652,2296,3675,6664,7042,7474,51301,388585	BMP4,FOXC1,ITGA3,SOX11,TGFB2,WNT5A,GCNT4,HES5
2_Member	GO Biological Processes	GO:0007369	gastrulation	-3.47921	-1.43788	6/161	652,1969,2296,3675,7157,7474	BMP4,EPHA2,FOXC1,ITGA3,TP53,WNT5A
2_Member	GO Biological Processes	GO:0061311	cell surface receptor signaling pathway involved in heart development	-3.47352	-1.43527	3/24	652,4488,7474	BMP4,MSX2,WNT5A
2_Member	GO Biological Processes	GO:0042733	embryonic digit morphogenesis	-3.4702	-1.43527	4/58	652,4488,7474,60529	BMP4,MSX2,WNT5A,ALX4
2_Member	GO Biological Processes	GO:0010594	regulation of endothelial cell migration	-3.43756	-1.4078	7/230	652,1969,2260,3728,7474,23598,23616	BMP4,EPHA2,FGFR1,JUP,WNT5A,PATZ1,SH3BP1
2_Member	GO Biological Processes	GO:0048863	stem cell differentiation	-3.43642	-1.4078	6/164	2296,2637,4488,6664,7042,7157	FOXC1,GBX2,MSX2,SOX11,TGFB2,TP53
2_Member	GO Biological Processes	GO:0060537	muscle tissue development	-3.41101	-1.3927	8/306	652,2296,2353,4488,6664,7042,7134,7474	BMP4,FOXC1,FOS,MSX2,SOX11,TGFB2,TNNC1,WNT5A
2_Member	GO Biological Processes	GO:0051446	positive regulation of meiotic cell cycle	-3.36839	-1.36282	3/26	4488,7474,23236	MSX2,WNT5A,PLCB1
2_Member	GO Biological Processes	GO:0030155	regulation of cell adhesion	-3.36002	-1.35773	13/760	652,970,1952,1969,2319,3675,3728,4155,7042,7414,7474,57091,84959	BMP4,CD70,CELSR2,EPHA2,FLOT2,ITGA3,JUP,MBP,TGFB2,VCL,WNT5A,CASS4,UBASH3B
2_Member	GO Biological Processes	GO:0001763	morphogenesis of a branching structure	-3.34002	-1.34358	6/171	652,1969,2637,4488,7474,57471	BMP4,EPHA2,GBX2,MSX2,WNT5A,ERMN
2_Member	GO Biological Processes	GO:0048738	cardiac muscle tissue development	-3.31332	-1.32647	6/173	652,2296,4488,7042,7134,7474	BMP4,FOXC1,MSX2,TGFB2,TNNC1,WNT5A
2_Member	GO Biological Processes	GO:0030324	lung development	-3.3001	-1.31789	6/174	652,1907,3675,6664,7474,9394	BMP4,EDN2,ITGA3,SOX11,WNT5A,HS6ST1
2_Member	GO Biological Processes	GO:0001704	formation of primary germ layer	-3.29909	-1.31789	5/114	652,1969,2296,3675,7474	BMP4,EPHA2,FOXC1,ITGA3,WNT5A
2_Member	GO Biological Processes	GO:0008283	cell population proliferation	-3.28132	-1.30385	10/489	652,970,1969,2296,2637,6664,7042,7157,7474,7482	BMP4,CD70,EPHA2,FOXC1,GBX2,SOX11,TGFB2,TP53,WNT5A,WNT2B
2_Member	GO Biological Processes	GO:0030323	respiratory tube development	-3.24811	-1.27982	6/178	652,1907,3675,6664,7474,9394	BMP4,EDN2,ITGA3,SOX11,WNT5A,HS6ST1
2_Member	GO Biological Processes	GO:0030278	regulation of ossification	-3.2308	-1.26952	5/118	652,6664,7042,7474,9636	BMP4,SOX11,TGFB2,WNT5A,ISG15
2_Member	GO Biological Processes	GO:0060603	mammary gland duct morphogenesis	-3.22604	-1.26727	3/29	1969,4488,7474	EPHA2,MSX2,WNT5A
2_Member	GO Biological Processes	GO:0001655	urogenital system development	-3.16152	-1.21795	8/334	652,2296,3675,6664,7042,7474,51301,388585	BMP4,FOXC1,ITGA3,SOX11,TGFB2,WNT5A,GCNT4,HES5
2_Member	GO Biological Processes	GO:0035115	embryonic forelimb morphogenesis	-3.1397	-1.21114	3/31	257,4488,60529	ALX3,MSX2,ALX4
2_Member	GO Biological Processes	GO:0010942	positive regulation of cell death	-3.13953	-1.21114	11/604	274,652,1788,2353,4217,4293,4488,7042,7157,7474,8795	BIN1,BMP4,DNMT3A,FOS,MAP3K5,MAP3K9,MSX2,TGFB2,TP53,WNT5A,TNFRSF10B
2_Member	GO Biological Processes	GO:0048839	inner ear development	-3.10001	-1.18344	6/190	652,2535,2637,7042,7474,388585	BMP4,FZD2,GBX2,TGFB2,WNT5A,HES5
2_Member	GO Biological Processes	GO:0040020	regulation of meiotic nuclear division	-3.09876	-1.18344	3/32	4488,7474,23236	MSX2,WNT5A,PLCB1
2_Member	GO Biological Processes	GO:0048565	digestive tract development	-3.08633	-1.17421	5/127	652,6664,7042,7474,60529	BMP4,SOX11,TGFB2,WNT5A,ALX4
2_Member	GO Biological Processes	GO:0045664	regulation of neuron differentiation	-3.0764	-1.16747	6/192	274,652,2260,6664,388585,440275	BIN1,BMP4,FGFR1,SOX11,HES5,EIF2AK4
2_Member	GO Biological Processes	GO:0045669	positive regulation of osteoblast differentiation	-3.06758	-1.16295	4/74	652,4488,6664,222663	BMP4,MSX2,SOX11,SCUBE3
2_Member	GO Biological Processes	GO:0070232	regulation of T cell apoptotic process	-3.02088	-1.12904	3/34	652,7157,7474	BMP4,TP53,WNT5A
2_Member	GO Biological Processes	GO:0060541	respiratory system development	-3.00729	-1.12239	6/198	652,1907,3675,6664,7474,9394	BMP4,EDN2,ITGA3,SOX11,WNT5A,HS6ST1
2_Member	GO Biological Processes	GO:0048754	branching morphogenesis of an epithelial tube	-2.99637	-1.11644	5/133	652,1969,2637,4488,7474	BMP4,EPHA2,GBX2,MSX2,WNT5A
2_Member	GO Biological Processes	GO:0001837	epithelial to mesenchymal transition	-2.98192	-1.10945	4/78	2260,4488,7042,7474	FGFR1,MSX2,TGFB2,WNT5A
2_Member	GO Biological Processes	GO:0061053	somite development	-2.98192	-1.10945	4/78	2296,6664,7157,7474	FOXC1,SOX11,TP53,WNT5A
2_Member	GO Biological Processes	GO:0045667	regulation of osteoblast differentiation	-2.95313	-1.08789	5/136	652,4488,6664,8994,222663	BMP4,MSX2,SOX11,LIMD1,SCUBE3
2_Member	GO Biological Processes	GO:0051783	regulation of nuclear division	-2.91097	-1.05705	5/139	652,4488,7474,23236,146691	BMP4,MSX2,WNT5A,PLCB1,TOM1L2
2_Member	GO Biological Processes	GO:0055123	digestive system development	-2.91097	-1.05705	5/139	652,6664,7042,7474,60529	BMP4,SOX11,TGFB2,WNT5A,ALX4
2_Member	GO Biological Processes	GO:0051098	regulation of binding	-2.9067	-1.05417	8/366	60,652,2296,4488,6664,7474,9355,84959	ACTB,BMP4,FOXC1,MSX2,SOX11,WNT5A,LHX2,UBASH3B
2_Member	GO Biological Processes	GO:0035136	forelimb morphogenesis	-2.87897	-1.03472	3/38	257,4488,60529	ALX3,MSX2,ALX4
2_Member	GO Biological Processes	GO:2000106	regulation of leukocyte apoptotic process	-2.84317	-1.01219	4/85	558,652,7157,7474	AXL,BMP4,TP53,WNT5A
2_Member	GO Biological Processes	GO:0030335	positive regulation of cell migration	-2.83654	-1.00705	10/560	652,1081,1907,1969,2260,3675,7042,7474,23224,57091	BMP4,CGA,EDN2,EPHA2,FGFR1,ITGA3,TGFB2,WNT5A,SYNE2,CASS4
2_Member	GO Biological Processes	GO:2000147	positive regulation of cell motility	-2.70317	-0.913894	10/584	652,1081,1907,1969,2260,3675,7042,7474,23224,57091	BMP4,CGA,EDN2,EPHA2,FGFR1,ITGA3,TGFB2,WNT5A,SYNE2,CASS4
2_Member	GO Biological Processes	GO:0048286	lung alveolus development	-2.69394	-0.911922	3/44	652,1907,9394	BMP4,EDN2,HS6ST1
2_Member	GO Biological Processes	GO:0048704	embryonic skeletal system morphogenesis	-2.6825	-0.904017	4/94	257,652,6664,60529	ALX3,BMP4,SOX11,ALX4
2_Member	GO Biological Processes	GO:0048732	gland development	-2.65882	-0.887325	8/401	652,1081,1969,2296,4488,5774,7042,7474	BMP4,CGA,EPHA2,FOXC1,MSX2,PTPN3,TGFB2,WNT5A
2_Member	GO Biological Processes	GO:0051272	positive regulation of cellular component movement	-2.6393	-0.87368	10/596	652,1081,1907,1969,2260,3675,7042,7474,23224,57091	BMP4,CGA,EDN2,EPHA2,FGFR1,ITGA3,TGFB2,WNT5A,SYNE2,CASS4
2_Member	GO Biological Processes	GO:0040017	positive regulation of locomotion	-2.62362	-0.862393	10/599	652,1081,1907,1969,2260,3675,7042,7474,23224,57091	BMP4,CGA,EDN2,EPHA2,FGFR1,ITGA3,TGFB2,WNT5A,SYNE2,CASS4
2_Member	GO Biological Processes	GO:0061138	morphogenesis of a branching epithelium	-2.6193	-0.86033	5/162	652,1969,2637,4488,7474	BMP4,EPHA2,GBX2,MSX2,WNT5A
2_Member	GO Biological Processes	GO:0048546	digestive tract morphogenesis	-2.58524	-0.839157	3/48	652,6664,7474	BMP4,SOX11,WNT5A
2_Member	GO Biological Processes	GO:0002011	morphogenesis of an epithelial sheet	-2.5596	-0.819301	3/49	4488,6664,7474	MSX2,SOX11,WNT5A
2_Member	GO Biological Processes	GO:0051445	regulation of meiotic cell cycle	-2.51001	-0.791715	3/51	4488,7474,23236	MSX2,WNT5A,PLCB1
2_Member	GO Biological Processes	GO:0043392	negative regulation of DNA binding	-2.48601	-0.775665	3/52	4488,6664,9355	MSX2,SOX11,LHX2
2_Member	GO Biological Processes	GO:0010634	positive regulation of epithelial cell migration	-2.48586	-0.775665	5/174	652,2260,3675,7042,7474	BMP4,FGFR1,ITGA3,TGFB2,WNT5A
2_Member	GO Biological Processes	GO:0043065	positive regulation of apoptotic process	-2.46377	-0.7563	9/529	274,652,4217,4293,4488,7042,7157,7474,8795	BIN1,BMP4,MAP3K5,MAP3K9,MSX2,TGFB2,TP53,WNT5A,TNFRSF10B
2_Member	GO Biological Processes	GO:0043068	positive regulation of programmed cell death	-2.39	-0.701324	9/543	274,652,4217,4293,4488,7042,7157,7474,8795	BIN1,BMP4,MAP3K5,MAP3K9,MSX2,TGFB2,TP53,WNT5A,TNFRSF10B
2_Member	GO Biological Processes	GO:0061180	mammary gland epithelium development	-2.37313	-0.694834	3/57	1969,4488,7474	EPHA2,MSX2,WNT5A
2_Member	GO Biological Processes	GO:0070228	regulation of lymphocyte apoptotic process	-2.37313	-0.694834	3/57	652,7157,7474	BMP4,TP53,WNT5A
2_Member	GO Biological Processes	GO:0051785	positive regulation of nuclear division	-2.331	-0.660097	3/59	4488,7474,23236	MSX2,WNT5A,PLCB1
2_Member	GO Biological Processes	GO:0001756	somitogenesis	-2.29042	-0.637716	3/61	2296,7157,7474	FOXC1,TP53,WNT5A
2_Member	GO Biological Processes	GO:0051101	regulation of DNA binding	-2.28892	-0.637716	4/121	2296,4488,6664,9355	FOXC1,MSX2,SOX11,LHX2
2_Member	GO Biological Processes	GO:0030879	mammary gland development	-2.26388	-0.615294	4/123	652,1969,4488,7474	BMP4,EPHA2,MSX2,WNT5A
2_Member	GO Biological Processes	GO:0050678	regulation of epithelial cell proliferation	-2.20795	-0.5781	7/379	652,1001,2260,6664,7042,7474,388585	BMP4,CDH3,FGFR1,SOX11,TGFB2,WNT5A,HES5
2_Member	GO Biological Processes	GO:0072006	nephron development	-2.2033	-0.575115	4/128	652,2296,3675,388585	BMP4,FOXC1,ITGA3,HES5
2_Member	GO Biological Processes	GO:0032147	activation of protein kinase activity	-2.15679	-0.542502	4/132	7042,7474,8795,9052	TGFB2,WNT5A,TNFRSF10B,GPRC5A
2_Member	GO Biological Processes	GO:0050679	positive regulation of epithelial cell proliferation	-2.15228	-0.538796	5/209	652,1001,2260,6664,7474	BMP4,CDH3,FGFR1,SOX11,WNT5A
2_Member	GO Biological Processes	GO:0021536	diencephalon development	-2.04227	-0.46438	3/75	652,2637,7474	BMP4,GBX2,WNT5A
3_Summary	WikiPathways	WP5087	Malignant pleural mesothelioma	-8.17357	-4.72997	16/447	60,1001,1969,2260,2535,3675,4214,4217,4293,4915,5871,7157,7474,7482,8463,8994,4155,5774,151742,1850,2353,7042,27092,558,652,8795,9052,57091,57679,79616,84959,374462,388585,440275,23236,9641,2319,3814,154043	ACTB,CDH3,EPHA2,FGFR1,FZD2,ITGA3,MAP3K1,MAP3K5,MAP3K9,NTRK2,MAP4K2,TP53,WNT5A,WNT2B,TEAD2,LIMD1,MBP,PTPN3,PPM1L,DUSP8,FOS,TGFB2,CACNG4,AXL,BMP4,TNFRSF10B,GPRC5A,CASS4,ALS2,CCNJL,UBASH3B,PTPRQ,HES5,EIF2AK4,PLCB1,IKBKE,FLOT2,KISS1,CNKSR3
3_Member	WikiPathways	WP5087	Malignant pleural mesothelioma	-8.17357	-4.72997	16/447	60,1001,1969,2260,2535,3675,4214,4217,4293,4915,5871,7157,7474,7482,8463,8994	ACTB,CDH3,EPHA2,FGFR1,FZD2,ITGA3,MAP3K1,MAP3K5,MAP3K9,NTRK2,MAP4K2,TP53,WNT5A,WNT2B,TEAD2,LIMD1
3_Member	GO Biological Processes	GO:0000165	MAPK cascade	-5.96519	-3.14991	9/182	2260,4155,4214,4217,4293,5774,5871,7474,151742	FGFR1,MBP,MAP3K1,MAP3K5,MAP3K9,PTPN3,MAP4K2,WNT5A,PPM1L
3_Member	KEGG Pathway	hsa04010	MAPK signaling pathway	-5.96512	-3.14991	11/294	1850,1969,2260,2353,4214,4217,4915,5871,7042,7157,27092	DUSP8,EPHA2,FGFR1,FOS,MAP3K1,MAP3K5,NTRK2,MAP4K2,TGFB2,TP53,CACNG4
3_Member	WikiPathways	WP382	MAPK signaling pathway	-5.74536	-3.07338	10/249	1850,2260,2353,4214,4217,4915,5871,7042,7157,27092	DUSP8,FGFR1,FOS,MAP3K1,MAP3K5,NTRK2,MAP4K2,TGFB2,TP53,CACNG4
3_Member	GO Biological Processes	GO:0043549	regulation of kinase activity	-5.72076	-3.07338	17/763	60,558,652,1969,2260,4217,4915,5871,7042,7474,8795,9052,57091,57679,79616,84959,374462	ACTB,AXL,BMP4,EPHA2,FGFR1,MAP3K5,NTRK2,MAP4K2,TGFB2,WNT5A,TNFRSF10B,GPRC5A,CASS4,ALS2,CCNJL,UBASH3B,PTPRQ
3_Member	GO Biological Processes	GO:0033674	positive regulation of kinase activity	-4.72937	-2.37783	12/473	558,1969,2260,4217,4915,5871,7042,7474,8795,9052,57091,57679	AXL,EPHA2,FGFR1,MAP3K5,NTRK2,MAP4K2,TGFB2,WNT5A,TNFRSF10B,GPRC5A,CASS4,ALS2
3_Member	GO Biological Processes	GO:0045859	regulation of protein kinase activity	-4.67192	-2.34227	14/645	60,652,2260,4217,5871,7042,7474,8795,9052,57091,57679,79616,84959,374462	ACTB,BMP4,FGFR1,MAP3K5,MAP4K2,TGFB2,WNT5A,TNFRSF10B,GPRC5A,CASS4,ALS2,CCNJL,UBASH3B,PTPRQ
3_Member	WikiPathways	WP400	p38 MAPK signaling pathway	-4.38538	-2.12148	4/34	4214,4217,4293,7042	MAP3K1,MAP3K5,MAP3K9,TGFB2
3_Member	GO Biological Processes	GO:0001934	positive regulation of protein phosphorylation	-4.1437	-1.93689	14/722	652,2260,4217,4915,5871,7042,7157,7474,8795,9052,57091,57679,388585,440275	BMP4,FGFR1,MAP3K5,NTRK2,MAP4K2,TGFB2,TP53,WNT5A,TNFRSF10B,GPRC5A,CASS4,ALS2,HES5,EIF2AK4
3_Member	GO Biological Processes	GO:0051347	positive regulation of transferase activity	-4.03198	-1.85555	12/559	558,1969,2260,4217,4915,5871,7042,7474,8795,9052,57091,57679	AXL,EPHA2,FGFR1,MAP3K5,NTRK2,MAP4K2,TGFB2,WNT5A,TNFRSF10B,GPRC5A,CASS4,ALS2
3_Member	GO Biological Processes	GO:0032874	positive regulation of stress-activated MAPK cascade	-3.96519	-1.80602	6/131	652,4217,5871,7042,7474,23236	BMP4,MAP3K5,MAP4K2,TGFB2,WNT5A,PLCB1
3_Member	GO Biological Processes	GO:0070304	positive regulation of stress-activated protein kinase signaling cascade	-3.929	-1.77821	6/133	652,4217,5871,7042,7474,23236	BMP4,MAP3K5,MAP4K2,TGFB2,WNT5A,PLCB1
3_Member	GO Biological Processes	GO:0006468	protein phosphorylation	-3.70065	-1.59947	13/700	558,652,1969,2260,4214,4217,4293,4915,5871,7042,7474,9641,440275	AXL,BMP4,EPHA2,FGFR1,MAP3K1,MAP3K5,MAP3K9,NTRK2,MAP4K2,TGFB2,WNT5A,IKBKE,EIF2AK4
3_Member	WikiPathways	WP481	Insulin signaling	-3.47921	-1.43788	6/161	2319,2353,4214,4217,4293,5871	FLOT2,FOS,MAP3K1,MAP3K5,MAP3K9,MAP4K2
3_Member	GO Biological Processes	GO:0045860	positive regulation of protein kinase activity	-3.35205	-1.35367	9/393	2260,4217,5871,7042,7474,8795,9052,57091,57679	FGFR1,MAP3K5,MAP4K2,TGFB2,WNT5A,TNFRSF10B,GPRC5A,CASS4,ALS2
3_Member	GO Biological Processes	GO:0043408	regulation of MAPK cascade	-3.22479	-1.26727	12/686	652,1850,1969,2260,3814,4217,4915,5871,7042,7474,23236,154043	BMP4,DUSP8,EPHA2,FGFR1,KISS1,MAP3K5,NTRK2,MAP4K2,TGFB2,WNT5A,PLCB1,CNKSR3
3_Member	GO Biological Processes	GO:0032872	regulation of stress-activated MAPK cascade	-3.01863	-1.12832	6/197	652,4217,5871,7042,7474,23236	BMP4,MAP3K5,MAP4K2,TGFB2,WNT5A,PLCB1
3_Member	WikiPathways	WP3915	Angiopoietin-like protein 8 regulatory pathway	-3.01104	-1.12375	5/132	2319,4214,4217,4293,5871	FLOT2,MAP3K1,MAP3K5,MAP3K9,MAP4K2
3_Member	GO Biological Processes	GO:0070302	regulation of stress-activated protein kinase signaling cascade	-2.9848	-1.10945	6/200	652,4217,5871,7042,7474,23236	BMP4,MAP3K5,MAP4K2,TGFB2,WNT5A,PLCB1
3_Member	GO Biological Processes	GO:0071900	regulation of protein serine/threonine kinase activity	-2.86208	-1.01918	8/372	60,652,2260,4217,5871,7474,57679,79616	ACTB,BMP4,FGFR1,MAP3K5,MAP4K2,WNT5A,ALS2,CCNJL
3_Member	GO Biological Processes	GO:0043507	positive regulation of JUN kinase activity	-2.7228	-0.925121	3/43	4217,5871,7474	MAP3K5,MAP4K2,WNT5A
3_Member	GO Biological Processes	GO:0043410	positive regulation of MAPK cascade	-2.68432	-0.904661	9/490	652,2260,3814,4217,4915,5871,7042,7474,23236	BMP4,FGFR1,KISS1,MAP3K5,NTRK2,MAP4K2,TGFB2,WNT5A,PLCB1
3_Member	GO Biological Processes	GO:0046330	positive regulation of JNK cascade	-2.66573	-0.893071	4/95	4217,5871,7474,23236	MAP3K5,MAP4K2,WNT5A,PLCB1
3_Member	Canonical Pathways	M128	PID TNF PATHWAY	-2.6383	-0.87368	3/46	4214,4217,5871	MAP3K1,MAP3K5,MAP4K2
3_Member	GO Biological Processes	GO:0007254	JNK cascade	-2.58524	-0.839157	3/48	4217,5871,7474	MAP3K5,MAP4K2,WNT5A
3_Member	GO Biological Processes	GO:0043405	regulation of MAP kinase activity	-2.39279	-0.702203	5/183	652,2260,4217,5871,7474	BMP4,FGFR1,MAP3K5,MAP4K2,WNT5A
3_Member	GO Biological Processes	GO:0043406	positive regulation of MAP kinase activity	-2.35368	-0.678169	4/116	2260,4217,5871,7474	FGFR1,MAP3K5,MAP4K2,WNT5A
3_Member	KEGG Pathway	hsa04722	Neurotrophin signaling pathway	-2.31445	-0.65137	4/119	4214,4217,4915,7157	MAP3K1,MAP3K5,NTRK2,TP53
3_Member	GO Biological Processes	GO:0043506	regulation of JUN kinase activity	-2.31053	-0.65137	3/60	4217,5871,7474	MAP3K5,MAP4K2,WNT5A
3_Member	GO Biological Processes	GO:0051403	stress-activated MAPK cascade	-2.23224	-0.593973	3/64	4217,5871,7474	MAP3K5,MAP4K2,WNT5A
3_Member	GO Biological Processes	GO:0071902	positive regulation of protein serine/threonine kinase activity	-2.16084	-0.542502	5/208	2260,4217,5871,7474,57679	FGFR1,MAP3K5,MAP4K2,WNT5A,ALS2
3_Member	GO Biological Processes	GO:0031098	stress-activated protein kinase signaling cascade	-2.15921	-0.542502	3/68	4217,5871,7474	MAP3K5,MAP4K2,WNT5A
3_Member	GO Biological Processes	GO:0046328	regulation of JNK cascade	-2.06857	-0.483061	4/140	4217,5871,7474,23236	MAP3K5,MAP4K2,WNT5A,PLCB1
4_Summary	KEGG Pathway	hsa05200	Pathways in cancer	-7.13694	-3.89768	16/531	652,1630,2260,2353,2535,3675,3728,6502,7042,7157,7474,7482,9915,23236,196883,388585,535,5521,9636,9641,155066,60,286,5158,26523,8788,4488,55553,9355,4155,1952,1001,51421,55506,4214	BMP4,DCC,FGFR1,FOS,FZD2,ITGA3,JUP,SKP2,TGFB2,TP53,WNT5A,WNT2B,ARNT2,PLCB1,ADCY4,HES5,ATP6V0A1,PPP2R2B,ISG15,IKBKE,ATP6V0E2,ACTB,ANK1,PDE6B,AGO1,DLK1,MSX2,SOX6,LHX2,MBP,CELSR2,CDH3,AMOTL2,MACROH2A2,MAP3K1
4_Member	KEGG Pathway	hsa05200	Pathways in cancer	-7.13694	-3.89768	16/531	652,1630,2260,2353,2535,3675,3728,6502,7042,7157,7474,7482,9915,23236,196883,388585	BMP4,DCC,FGFR1,FOS,FZD2,ITGA3,JUP,SKP2,TGFB2,TP53,WNT5A,WNT2B,ARNT2,PLCB1,ADCY4,HES5
4_Member	KEGG Pathway	hsa05165	Human papillomavirus infection	-5.46807	-2.89223	11/331	535,2535,3675,5521,7157,7474,7482,9636,9641,155066,388585	ATP6V0A1,FZD2,ITGA3,PPP2R2B,TP53,WNT5A,WNT2B,ISG15,IKBKE,ATP6V0E2,HES5
4_Member	KEGG Pathway	hsa05224	Breast cancer	-4.65035	-2.32516	7/147	2260,2353,2535,7157,7474,7482,388585	FGFR1,FOS,FZD2,TP53,WNT5A,WNT2B,HES5
4_Member	KEGG Pathway	hsa05205	Proteoglycans in cancer	-4.61252	-2.29926	8/205	60,286,2260,2535,7042,7157,7474,7482	ACTB,ANK1,FGFR1,FZD2,TGFB2,TP53,WNT5A,WNT2B
4_Member	Reactome Gene Sets	R-HSA-4086398	Ca2+ pathway	-4.55151	-2.25015	5/62	2535,5158,7474,23236,26523	FZD2,PDE6B,WNT5A,PLCB1,AGO1
4_Member	KEGG Pathway	hsa05217	Basal cell carcinoma	-4.51759	-2.22399	5/63	652,2535,7157,7474,7482	BMP4,FZD2,TP53,WNT5A,WNT2B
4_Member	WikiPathways	WP4262	Breast cancer pathway	-4.46686	-2.18463	7/157	2260,2353,2535,7157,7474,7482,388585	FGFR1,FOS,FZD2,TP53,WNT5A,WNT2B,HES5
4_Member	WikiPathways	WP4239	Epithelial to mesenchymal transition in colorectal cancer	-4.32939	-2.07612	7/165	2535,3728,7042,7157,7474,7482,8788	FZD2,JUP,TGFB2,TP53,WNT5A,WNT2B,DLK1
4_Member	WikiPathways	WP3931	Embryonic stem cell pluripotency pathways	-4.19631	-1.97673	6/119	652,2260,2353,2535,7474,7482	BMP4,FGFR1,FOS,FZD2,WNT5A,WNT2B
4_Member	KEGG Pathway	hsa05226	Gastric cancer	-3.66006	-1.56865	6/149	2535,3728,7042,7157,7474,7482	FZD2,JUP,TGFB2,TP53,WNT5A,WNT2B
4_Member	KEGG Pathway	hsa04916	Melanogenesis	-3.54128	-1.48015	5/101	2535,7474,7482,23236,196883	FZD2,WNT5A,WNT2B,PLCB1,ADCY4
4_Member	GO Biological Processes	GO:0051216	cartilage development	-3.53772	-1.47967	6/157	652,4488,7474,7482,55553,388585	BMP4,MSX2,WNT5A,WNT2B,SOX6,HES5
4_Member	GO Biological Processes	GO:0021871	forebrain regionalization	-3.52969	-1.47967	3/23	652,7482,9355	BMP4,WNT2B,LHX2
4_Member	WikiPathways	WP399	Wnt signaling pathway and pluripotency	-3.42538	-1.39884	5/107	2535,5521,7157,7474,7482	FZD2,PPP2R2B,TP53,WNT5A,WNT2B
4_Member	KEGG Pathway	hsa05225	Hepatocellular carcinoma	-3.38076	-1.36853	6/168	60,2535,7042,7157,7474,7482	ACTB,FZD2,TGFB2,TP53,WNT5A,WNT2B
4_Member	GO Biological Processes	GO:0003156	regulation of animal organ formation	-3.36839	-1.36282	3/26	652,7474,7482	BMP4,WNT5A,WNT2B
4_Member	WikiPathways	WP4787	Osteoblast differentiation and related diseases	-3.19763	-1.2454	5/120	652,2260,2535,7474,7482	BMP4,FGFR1,FZD2,WNT5A,WNT2B
4_Member	GO Biological Processes	GO:0110110	positive regulation of animal organ morphogenesis	-3.18209	-1.23428	3/30	652,7474,7482	BMP4,WNT5A,WNT2B
4_Member	GO Biological Processes	GO:0061036	positive regulation of cartilage development	-3.1397	-1.21114	3/31	652,7474,55553	BMP4,WNT5A,SOX6
4_Member	WikiPathways	WP4304	Oligodendrocyte specification and differentiation, leading to myelin components for CNS	-3.1397	-1.21114	3/31	652,4155,55553	BMP4,MBP,SOX6
4_Member	GO Biological Processes	GO:0002062	chondrocyte differentiation	-3.11236	-1.18892	4/72	652,4488,7482,55553	BMP4,MSX2,WNT2B,SOX6
4_Member	GO Biological Processes	GO:2000027	regulation of animal organ morphogenesis	-3.1018	-1.18344	5/126	652,1952,2535,7474,7482	BMP4,CELSR2,FZD2,WNT5A,WNT2B
4_Member	GO Biological Processes	GO:1905207	regulation of cardiocyte differentiation	-2.98377	-1.10945	3/35	652,7042,55553	BMP4,TGFB2,SOX6
4_Member	GO Biological Processes	GO:0060070	canonical Wnt signaling pathway	-2.90101	-1.05048	4/82	1001,2535,7474,7482	CDH3,FZD2,WNT5A,WNT2B
4_Member	GO Biological Processes	GO:0061448	connective tissue development	-2.89747	-1.05048	6/208	652,4488,7474,7482,55553,388585	BMP4,MSX2,WNT5A,WNT2B,SOX6,HES5
4_Member	KEGG Pathway	hsa04550	Signaling pathways regulating pluripotency of stem cells	-2.85637	-1.01484	5/143	652,2260,2535,7474,7482	BMP4,FGFR1,FZD2,WNT5A,WNT2B
4_Member	GO Biological Processes	GO:0060071	Wnt signaling pathway, planar cell polarity pathway	-2.84602	-1.01219	3/39	1952,2535,7474	CELSR2,FZD2,WNT5A
4_Member	WikiPathways	WP4150	Wnt signaling in kidney disease	-2.84602	-1.01219	3/39	2535,7474,7482	FZD2,WNT5A,WNT2B
4_Member	Reactome Gene Sets	R-HSA-3858494	Beta-catenin independent WNT signaling	-2.81657	-0.99493	5/146	2535,5158,7474,23236,26523	FZD2,PDE6B,WNT5A,PLCB1,AGO1
4_Member	Canonical Pathways	M5493	WNT SIGNALING	-2.76951	-0.955577	4/89	60,2535,7474,7482	ACTB,FZD2,WNT5A,WNT2B
4_Member	KEGG Pathway	hsa04934	Cushing syndrome	-2.70266	-0.913894	5/155	2535,7474,7482,23236,196883	FZD2,WNT5A,WNT2B,PLCB1,ADCY4
4_Member	GO Biological Processes	GO:1905114	cell surface receptor signaling pathway involved in cell-cell signaling	-2.61422	-0.859169	7/319	652,1001,1952,2535,7474,7482,51421	BMP4,CDH3,CELSR2,FZD2,WNT5A,WNT2B,AMOTL2
4_Member	WikiPathways	WP2848	Pluripotent stem cell differentiation pathway	-2.58524	-0.839157	3/48	652,7474,7482	BMP4,WNT5A,WNT2B
4_Member	KEGG Pathway	hsa04310	Wnt signaling pathway	-2.56232	-0.819301	5/167	2535,7157,7474,7482,23236	FZD2,TP53,WNT5A,WNT2B,PLCB1
4_Member	GO Biological Processes	GO:0045165	cell fate commitment	-2.54932	-0.812227	6/244	652,7157,7474,7482,55553,388585	BMP4,TP53,WNT5A,WNT2B,SOX6,HES5
4_Member	WikiPathways	WP4258	lncRNA in canonical Wnt signaling and colorectal cancer	-2.52321	-0.797667	4/104	2535,7474,7482,55506	FZD2,WNT5A,WNT2B,MACROH2A2
4_Member	Reactome Gene Sets	R-HSA-195721	Signaling by WNT	-2.51819	-0.793716	7/332	2535,5158,7474,7482,23236,26523,55553	FZD2,PDE6B,WNT5A,WNT2B,PLCB1,AGO1,SOX6
4_Member	GO Biological Processes	GO:0035567	non-canonical Wnt signaling pathway	-2.51001	-0.791715	3/51	1952,2535,7474	CELSR2,FZD2,WNT5A
4_Member	GO Biological Processes	GO:0060688	regulation of morphogenesis of a branching structure	-2.51001	-0.791715	3/51	652,7474,7482	BMP4,WNT5A,WNT2B
4_Member	GO Biological Processes	GO:0016055	Wnt signaling pathway	-2.45535	-0.752117	6/255	1001,1952,2535,7474,7482,51421	CDH3,CELSR2,FZD2,WNT5A,WNT2B,AMOTL2
4_Member	GO Biological Processes	GO:0198738	cell-cell signaling by wnt	-2.45535	-0.752117	6/255	1001,1952,2535,7474,7482,51421	CDH3,CELSR2,FZD2,WNT5A,WNT2B,AMOTL2
4_Member	GO Biological Processes	GO:0090175	regulation of establishment of planar polarity	-2.37313	-0.694834	3/57	1952,2535,7474	CELSR2,FZD2,WNT5A
4_Member	WikiPathways	WP710	DNA damage response (only ATM dependent)	-2.36702	-0.689653	4/115	4214,7157,7474,7482	MAP3K1,TP53,WNT5A,WNT2B
4_Member	WikiPathways	WP428	Wnt signaling	-2.3274	-0.659184	4/118	2535,7474,7482,23236	FZD2,WNT5A,WNT2B,PLCB1
4_Member	GO Biological Processes	GO:1905330	regulation of morphogenesis of an epithelium	-2.21351	-0.582603	3/65	652,7474,7482	BMP4,WNT5A,WNT2B
4_Member	GO Biological Processes	GO:0061035	regulation of cartilage development	-2.12447	-0.520506	3/70	652,7474,55553	BMP4,WNT5A,SOX6
5_Summary	WikiPathways	WP2447	Amyotrophic lateral sclerosis (ALS)	-7.13042	-3.89768	6/38	2890,4217,4744,4747,7157,57679,60,3675,7474,1350,4714,2535,114798	GRIA1,MAP3K5,NEFH,NEFL,TP53,ALS2,ACTB,ITGA3,WNT5A,COX7C,NDUFB8,FZD2,SLITRK1
5_Member	WikiPathways	WP2447	Amyotrophic lateral sclerosis (ALS)	-7.13042	-3.89768	6/38	2890,4217,4744,4747,7157,57679	GRIA1,MAP3K5,NEFH,NEFL,TP53,ALS2
5_Member	GO Biological Processes	GO:0099188	postsynaptic cytoskeleton organization	-4.41547	-2.14434	3/12	60,4744,4747	ACTB,NEFH,NEFL
5_Member	GO Biological Processes	GO:0099173	postsynapse organization	-3.79809	-1.66625	5/89	60,3675,4744,4747,7474	ACTB,ITGA3,NEFH,NEFL,WNT5A
5_Member	KEGG Pathway	hsa05014	Amyotrophic lateral sclerosis	-3.5942	-1.51655	9/364	60,1350,2890,4217,4714,4744,4747,7157,57679	ACTB,COX7C,GRIA1,MAP3K5,NDUFB8,NEFH,NEFL,TP53,ALS2
5_Member	WikiPathways	WP3680	Physico-chemical features and toxicity-associated pathways	-3.20619	-1.25044	4/68	2535,2890,4744,4747	FZD2,GRIA1,NEFH,NEFL
5_Member	GO Biological Processes	GO:0050808	synapse organization	-2.89953	-1.05048	7/284	60,3675,4744,4747,7474,57679,114798	ACTB,ITGA3,NEFH,NEFL,WNT5A,ALS2,SLITRK1
6_Summary	GO Biological Processes	GO:0060284	regulation of cell development	-6.69669	-3.58045	15/500	274,652,1630,4155,4747,4915,6664,7157,7414,7474,9355,23236,57091,114798,388585,2637,2539,4488,7042,8994,55553,84959,440275,1969,3675,11178,23224,23327,57471	BIN1,BMP4,DCC,MBP,NEFL,NTRK2,SOX11,TP53,VCL,WNT5A,LHX2,PLCB1,CASS4,SLITRK1,HES5,GBX2,G6PD,MSX2,TGFB2,LIMD1,SOX6,UBASH3B,EIF2AK4,EPHA2,ITGA3,LZTS1,SYNE2,NEDD4L,ERMN
6_Member	GO Biological Processes	GO:0060284	regulation of cell development	-6.69669	-3.58045	15/500	274,652,1630,4155,4747,4915,6664,7157,7414,7474,9355,23236,57091,114798,388585	BIN1,BMP4,DCC,MBP,NEFL,NTRK2,SOX11,TP53,VCL,WNT5A,LHX2,PLCB1,CASS4,SLITRK1,HES5
6_Member	GO Biological Processes	GO:0050767	regulation of neurogenesis	-5.11112	-2.66206	11/361	274,1630,4155,4747,4915,6664,7157,7474,9355,114798,388585	BIN1,DCC,MBP,NEFL,NTRK2,SOX11,TP53,WNT5A,LHX2,SLITRK1,HES5
6_Member	GO Biological Processes	GO:0051960	regulation of nervous system development	-5.05063	-2.62303	12/439	274,1630,2637,4155,4747,4915,6664,7157,7474,9355,114798,388585	BIN1,DCC,GBX2,MBP,NEFL,NTRK2,SOX11,TP53,WNT5A,LHX2,SLITRK1,HES5
6_Member	GO Biological Processes	GO:0045596	negative regulation of cell differentiation	-5.01524	-2.6041	15/685	652,1630,2539,4155,4488,6664,7042,7157,7474,8994,9355,55553,84959,388585,440275	BMP4,DCC,G6PD,MBP,MSX2,SOX11,TGFB2,TP53,WNT5A,LIMD1,LHX2,SOX6,UBASH3B,HES5,EIF2AK4
6_Member	GO Biological Processes	GO:0050768	negative regulation of neurogenesis	-4.78741	-2.423	7/140	1630,4155,6664,7157,7474,9355,388585	DCC,MBP,SOX11,TP53,WNT5A,LHX2,HES5
6_Member	GO Biological Processes	GO:0051961	negative regulation of nervous system development	-4.68875	-2.3549	7/145	1630,4155,6664,7157,7474,9355,388585	DCC,MBP,SOX11,TP53,WNT5A,LHX2,HES5
6_Member	GO Biological Processes	GO:0010721	negative regulation of cell development	-4.07601	-1.87952	7/181	1630,4155,6664,7157,7474,9355,388585	DCC,MBP,SOX11,TP53,WNT5A,LHX2,HES5
6_Member	GO Biological Processes	GO:0050770	regulation of axonogenesis	-3.58274	-1.51598	6/154	1630,4155,4747,4915,7474,114798	DCC,MBP,NEFL,NTRK2,WNT5A,SLITRK1
6_Member	GO Biological Processes	GO:0031344	regulation of cell projection organization	-3.49815	-1.45161	12/639	1630,1969,3675,4155,4747,4915,7474,11178,23224,23327,57471,114798	DCC,EPHA2,ITGA3,MBP,NEFL,NTRK2,WNT5A,LZTS1,SYNE2,NEDD4L,ERMN,SLITRK1
6_Member	GO Biological Processes	GO:0010975	regulation of neuron projection development	-3.06716	-1.16295	9/431	1630,3675,4155,4747,4915,7474,11178,23327,114798	DCC,ITGA3,MBP,NEFL,NTRK2,WNT5A,LZTS1,NEDD4L,SLITRK1
6_Member	GO Biological Processes	GO:0120035	regulation of plasma membrane bounded cell projection organization	-3.03607	-1.13964	11/622	1630,1969,3675,4155,4747,4915,7474,11178,23224,23327,114798	DCC,EPHA2,ITGA3,MBP,NEFL,NTRK2,WNT5A,LZTS1,SYNE2,NEDD4L,SLITRK1
6_Member	GO Biological Processes	GO:0050771	negative regulation of axonogenesis	-2.23224	-0.593973	3/64	1630,4155,7474	DCC,MBP,WNT5A
6_Member	GO Biological Processes	GO:1901888	regulation of cell junction assembly	-2.22221	-0.58576	5/201	1969,4915,7414,7474,114798	EPHA2,NTRK2,VCL,WNT5A,SLITRK1
7_Summary	GO Biological Processes	GO:0035239	tube morphogenesis	-6.57515	-3.52951	17/661	652,1907,1969,2296,2535,2637,4488,4915,6664,7042,7474,8463,9355,9394,51421,128240,388585,26523,3728	BMP4,EDN2,EPHA2,FOXC1,FZD2,GBX2,MSX2,NTRK2,SOX11,TGFB2,WNT5A,TEAD2,LHX2,HS6ST1,AMOTL2,NAXE,HES5,AGO1,JUP
7_Member	GO Biological Processes	GO:0035239	tube morphogenesis	-6.57515	-3.52951	17/661	652,1907,1969,2296,2535,2637,4488,4915,6664,7042,7474,8463,9355,9394,51421,128240,388585	BMP4,EDN2,EPHA2,FOXC1,FZD2,GBX2,MSX2,NTRK2,SOX11,TGFB2,WNT5A,TEAD2,LHX2,HS6ST1,AMOTL2,NAXE,HES5
7_Member	GO Biological Processes	GO:0048514	blood vessel morphogenesis	-4.51297	-2.22319	11/419	652,1907,1969,2296,2637,4915,7042,8463,9394,51421,128240	BMP4,EDN2,EPHA2,FOXC1,GBX2,NTRK2,TGFB2,TEAD2,HS6ST1,AMOTL2,NAXE
7_Member	GO Biological Processes	GO:0001568	blood vessel development	-3.80827	-1.66841	11/503	652,1907,1969,2296,2637,4915,7042,8463,9394,51421,128240	BMP4,EDN2,EPHA2,FOXC1,GBX2,NTRK2,TGFB2,TEAD2,HS6ST1,AMOTL2,NAXE
7_Member	GO Biological Processes	GO:0001944	vasculature development	-3.64122	-1.55461	11/526	652,1907,1969,2296,2637,4915,7042,8463,9394,51421,128240	BMP4,EDN2,EPHA2,FOXC1,GBX2,NTRK2,TGFB2,TEAD2,HS6ST1,AMOTL2,NAXE
7_Member	GO Biological Processes	GO:0001525	angiogenesis	-3.27398	-1.29998	8/321	652,1907,1969,2296,2637,9394,51421,128240	BMP4,EDN2,EPHA2,FOXC1,GBX2,HS6ST1,AMOTL2,NAXE
7_Member	GO Biological Processes	GO:0016525	negative regulation of angiogenesis	-2.77771	-0.962505	5/149	1969,2296,7042,26523,128240	EPHA2,FOXC1,TGFB2,AGO1,NAXE
7_Member	GO Biological Processes	GO:2000181	negative regulation of blood vessel morphogenesis	-2.75231	-0.945952	5/151	1969,2296,7042,26523,128240	EPHA2,FOXC1,TGFB2,AGO1,NAXE
7_Member	GO Biological Processes	GO:1901343	negative regulation of vasculature development	-2.73975	-0.934648	5/152	1969,2296,7042,26523,128240	EPHA2,FOXC1,TGFB2,AGO1,NAXE
7_Member	GO Biological Processes	GO:0045765	regulation of angiogenesis	-2.42688	-0.725619	7/345	1969,2296,3728,7042,7474,26523,128240	EPHA2,FOXC1,JUP,TGFB2,WNT5A,AGO1,NAXE
7_Member	GO Biological Processes	GO:1901342	regulation of vasculature development	-2.38623	-0.699466	7/351	1969,2296,3728,7042,7474,26523,128240	EPHA2,FOXC1,JUP,TGFB2,WNT5A,AGO1,NAXE
7_Member	GO Biological Processes	GO:0002040	sprouting angiogenesis	-2.331	-0.660097	3/59	652,1969,128240	BMP4,EPHA2,NAXE
8_Summary	GO Biological Processes	GO:0048812	neuron projection morphogenesis	-6.41464	-3.42968	14/455	60,1630,1907,1952,1969,2637,4744,4747,7414,7474,9355,57679,114798,440275,652,1081,2296,4488,7042,7157,558,388585	ACTB,DCC,EDN2,CELSR2,EPHA2,GBX2,NEFH,NEFL,VCL,WNT5A,LHX2,ALS2,SLITRK1,EIF2AK4,BMP4,CGA,FOXC1,MSX2,TGFB2,TP53,AXL,HES5
8_Member	GO Biological Processes	GO:0048812	neuron projection morphogenesis	-6.41464	-3.42968	14/455	60,1630,1907,1952,1969,2637,4744,4747,7414,7474,9355,57679,114798,440275	ACTB,DCC,EDN2,CELSR2,EPHA2,GBX2,NEFH,NEFL,VCL,WNT5A,LHX2,ALS2,SLITRK1,EIF2AK4
8_Member	GO Biological Processes	GO:0120039	plasma membrane bounded cell projection morphogenesis	-6.36918	-3.4027	14/459	60,1630,1907,1952,1969,2637,4744,4747,7414,7474,9355,57679,114798,440275	ACTB,DCC,EDN2,CELSR2,EPHA2,GBX2,NEFH,NEFL,VCL,WNT5A,LHX2,ALS2,SLITRK1,EIF2AK4
8_Member	GO Biological Processes	GO:0048858	cell projection morphogenesis	-6.32419	-3.37823	14/463	60,1630,1907,1952,1969,2637,4744,4747,7414,7474,9355,57679,114798,440275	ACTB,DCC,EDN2,CELSR2,EPHA2,GBX2,NEFH,NEFL,VCL,WNT5A,LHX2,ALS2,SLITRK1,EIF2AK4
8_Member	GO Biological Processes	GO:0032990	cell part morphogenesis	-6.11673	-3.26141	14/482	60,1630,1907,1952,1969,2637,4744,4747,7414,7474,9355,57679,114798,440275	ACTB,DCC,EDN2,CELSR2,EPHA2,GBX2,NEFH,NEFL,VCL,WNT5A,LHX2,ALS2,SLITRK1,EIF2AK4
8_Member	GO Biological Processes	GO:0048589	developmental growth	-5.81966	-3.07338	12/369	652,1081,1907,2296,4488,7042,7157,7414,7474,9355,114798,440275	BMP4,CGA,EDN2,FOXC1,MSX2,TGFB2,TP53,VCL,WNT5A,LHX2,SLITRK1,EIF2AK4
8_Member	GO Biological Processes	GO:0040007	growth	-5.79532	-3.07338	12/371	652,1081,1907,2296,4488,7042,7157,7414,7474,9355,114798,440275	BMP4,CGA,EDN2,FOXC1,MSX2,TGFB2,TP53,VCL,WNT5A,LHX2,SLITRK1,EIF2AK4
8_Member	GO Biological Processes	GO:0000902	cell morphogenesis	-5.77169	-3.07338	16/673	60,558,1630,1907,1952,1969,2637,4744,4747,7042,7414,7474,9355,57679,114798,440275	ACTB,AXL,DCC,EDN2,CELSR2,EPHA2,GBX2,NEFH,NEFL,TGFB2,VCL,WNT5A,LHX2,ALS2,SLITRK1,EIF2AK4
8_Member	GO Biological Processes	GO:0061564	axon development	-5.68767	-3.07338	12/380	60,1630,1907,1969,2637,4744,4747,7414,7474,9355,57679,114798	ACTB,DCC,EDN2,EPHA2,GBX2,NEFH,NEFL,VCL,WNT5A,LHX2,ALS2,SLITRK1
8_Member	GO Biological Processes	GO:0031175	neuron projection development	-5.37486	-2.83435	15/639	60,1630,1907,1952,1969,2637,4744,4747,7414,7474,9355,57679,114798,388585,440275	ACTB,DCC,EDN2,CELSR2,EPHA2,GBX2,NEFH,NEFL,VCL,WNT5A,LHX2,ALS2,SLITRK1,HES5,EIF2AK4
8_Member	GO Biological Processes	GO:0048667	cell morphogenesis involved in neuron differentiation	-5.3391	-2.80571	12/411	60,1630,1907,1952,1969,2637,4744,7414,7474,9355,57679,114798	ACTB,DCC,EDN2,CELSR2,EPHA2,GBX2,NEFH,VCL,WNT5A,LHX2,ALS2,SLITRK1
8_Member	GO Biological Processes	GO:0007409	axonogenesis	-5.33285	-2.80571	11/342	60,1630,1907,1969,2637,4744,7414,7474,9355,57679,114798	ACTB,DCC,EDN2,EPHA2,GBX2,NEFH,VCL,WNT5A,LHX2,ALS2,SLITRK1
8_Member	GO Biological Processes	GO:0032989	cellular component morphogenesis	-5.24594	-2.76281	14/573	60,1630,1907,1952,1969,2637,4744,4747,7414,7474,9355,57679,114798,440275	ACTB,DCC,EDN2,CELSR2,EPHA2,GBX2,NEFH,NEFL,VCL,WNT5A,LHX2,ALS2,SLITRK1,EIF2AK4
8_Member	GO Biological Processes	GO:0000904	cell morphogenesis involved in differentiation	-4.99516	-2.59786	13/522	60,558,1630,1907,1952,1969,2637,4744,7414,7474,9355,57679,114798	ACTB,AXL,DCC,EDN2,CELSR2,EPHA2,GBX2,NEFH,VCL,WNT5A,LHX2,ALS2,SLITRK1
8_Member	GO Biological Processes	GO:0060560	developmental growth involved in morphogenesis	-4.21675	-1.98488	6/118	652,1907,7414,7474,9355,440275	BMP4,EDN2,VCL,WNT5A,LHX2,EIF2AK4
8_Member	GO Biological Processes	GO:1990138	neuron projection extension	-3.2306	-1.26952	4/67	1907,7414,9355,440275	EDN2,VCL,LHX2,EIF2AK4
8_Member	GO Biological Processes	GO:0048675	axon extension	-2.84602	-1.01219	3/39	1907,7414,9355	EDN2,VCL,LHX2
8_Member	GO Biological Processes	GO:0048588	developmental cell growth	-2.69948	-0.913894	4/93	1907,7414,9355,440275	EDN2,VCL,LHX2,EIF2AK4
8_Member	GO Biological Processes	GO:0016049	cell growth	-2.66573	-0.893071	4/95	1907,7414,9355,440275	EDN2,VCL,LHX2,EIF2AK4
8_Member	GO Biological Processes	GO:0006935	chemotaxis	-2.0606	-0.475843	8/506	652,1630,1907,1969,2637,7042,7474,9355	BMP4,DCC,EDN2,EPHA2,GBX2,TGFB2,WNT5A,LHX2
8_Member	GO Biological Processes	GO:0042330	taxis	-2.04126	-0.46438	8/510	652,1630,1907,1969,2637,7042,7474,9355	BMP4,DCC,EDN2,EPHA2,GBX2,TGFB2,WNT5A,LHX2
8_Member	GO Biological Processes	GO:0007411	axon guidance	-2.00639	-0.439145	5/227	1630,1969,2637,7474,9355	DCC,EPHA2,GBX2,WNT5A,LHX2
9_Summary	GO Biological Processes	GO:0010035	response to inorganic substance	-5.79877	-3.07338	14/513	558,1788,2353,2539,2729,2890,4155,4217,4747,7134,7474,23236,23327,23498	AXL,DNMT3A,FOS,G6PD,GCLC,GRIA1,MBP,MAP3K5,NEFL,TNNC1,WNT5A,PLCB1,NEDD4L,HAAO
9_Member	GO Biological Processes	GO:0010035	response to inorganic substance	-5.79877	-3.07338	14/513	558,1788,2353,2539,2729,2890,4155,4217,4747,7134,7474,23236,23327,23498	AXL,DNMT3A,FOS,G6PD,GCLC,GRIA1,MBP,MAP3K5,NEFL,TNNC1,WNT5A,PLCB1,NEDD4L,HAAO
9_Member	GO Biological Processes	GO:0010038	response to metal ion	-3.71074	-1.60709	9/351	1788,2353,2539,2729,4155,7134,7474,23327,23498	DNMT3A,FOS,G6PD,GCLC,MBP,TNNC1,WNT5A,NEDD4L,HAAO
9_Member	GO Biological Processes	GO:0046686	response to cadmium ion	-2.331	-0.660097	3/59	2353,2729,23498	FOS,GCLC,HAAO
10_Summary	GO Biological Processes	GO:1901214	regulation of neuron death	-5.70123	-3.07338	11/313	558,1630,2353,2539,2729,4217,4747,4915,7042,7157,7474,1788,23677,60,2890,3728,23236	AXL,DCC,FOS,G6PD,GCLC,MAP3K5,NEFL,NTRK2,TGFB2,TP53,WNT5A,DNMT3A,SH3BP4,ACTB,GRIA1,JUP,PLCB1
10_Member	GO Biological Processes	GO:1901214	regulation of neuron death	-5.70123	-3.07338	11/313	558,1630,2353,2539,2729,4217,4747,4915,7042,7157,7474	AXL,DCC,FOS,G6PD,GCLC,MAP3K5,NEFL,NTRK2,TGFB2,TP53,WNT5A
10_Member	GO Biological Processes	GO:0043523	regulation of neuron apoptotic process	-3.71505	-1.60892	7/207	558,2539,2729,4747,4915,7042,7157	AXL,G6PD,GCLC,NEFL,NTRK2,TGFB2,TP53
10_Member	GO Biological Processes	GO:0071230	cellular response to amino acid stimulus	-3.04569	-1.14771	4/75	1788,2729,4915,23677	DNMT3A,GCLC,NTRK2,SH3BP4
10_Member	GO Biological Processes	GO:0071229	cellular response to acid chemical	-2.84317	-1.01219	4/85	1788,2729,4915,23677	DNMT3A,GCLC,NTRK2,SH3BP4
10_Member	GO Biological Processes	GO:1901699	cellular response to nitrogen compound	-2.45809	-0.752879	10/632	60,1788,2729,2890,3728,4217,4915,7157,23236,23677	ACTB,DNMT3A,GCLC,GRIA1,JUP,MAP3K5,NTRK2,TP53,PLCB1,SH3BP4
10_Member	GO Biological Processes	GO:0043200	response to amino acid	-2.3805	-0.695623	4/114	1788,2729,4915,23677	DNMT3A,GCLC,NTRK2,SH3BP4
10_Member	GO Biological Processes	GO:0001101	response to acid chemical	-2.19151	-0.565814	4/129	1788,2729,4915,23677	DNMT3A,GCLC,NTRK2,SH3BP4
10_Member	GO Biological Processes	GO:0043524	negative regulation of neuron apoptotic process	-2.01641	-0.445698	4/145	558,2729,4747,4915	AXL,GCLC,NEFL,NTRK2
11_Summary	GO Biological Processes	GO:0007163	establishment or maintenance of cell polarity	-5.69868	-3.07338	9/196	60,286,7474,9355,23255,23616,51421,81609,388585	ACTB,ANK1,WNT5A,LHX2,MTCL1,SH3BP1,AMOTL2,SNX27,HES5
11_Member	GO Biological Processes	GO:0007163	establishment or maintenance of cell polarity	-5.69868	-3.07338	9/196	60,286,7474,9355,23255,23616,51421,81609,388585	ACTB,ANK1,WNT5A,LHX2,MTCL1,SH3BP1,AMOTL2,SNX27,HES5
11_Member	GO Biological Processes	GO:0045197	establishment or maintenance of epithelial cell apical/basal polarity	-5.24158	-2.76281	5/45	286,7474,9355,23255,23616	ANK1,WNT5A,LHX2,MTCL1,SH3BP1
11_Member	GO Biological Processes	GO:0035088	establishment or maintenance of apical/basal cell polarity	-5.01247	-2.6041	5/50	286,7474,9355,23255,23616	ANK1,WNT5A,LHX2,MTCL1,SH3BP1
11_Member	GO Biological Processes	GO:0061245	establishment or maintenance of bipolar cell polarity	-5.01247	-2.6041	5/50	286,7474,9355,23255,23616	ANK1,WNT5A,LHX2,MTCL1,SH3BP1
11_Member	GO Biological Processes	GO:0030010	establishment of cell polarity	-3.18129	-1.23428	5/121	7474,23616,51421,81609,388585	WNT5A,SH3BP1,AMOTL2,SNX27,HES5
11_Member	GO Biological Processes	GO:0090162	establishment of epithelial cell polarity	-3.1397	-1.21114	3/31	7474,23616,388585	WNT5A,SH3BP1,HES5
11_Member	GO Biological Processes	GO:0001738	morphogenesis of a polarized epithelium	-2.61146	-0.859169	3/47	60,7474,23616	ACTB,WNT5A,SH3BP1
12_Summary	GO Biological Processes	GO:0007167	enzyme linked receptor protein signaling pathway	-5.69781	-3.07338	15/601	558,652,1969,2260,2296,2353,2591,4488,4915,7042,7157,23236,57091,84959,151742,2729,7474,55553,1630,1952,3675,60,535,3728,5774,155066,85453	AXL,BMP4,EPHA2,FGFR1,FOXC1,FOS,GALNT3,MSX2,NTRK2,TGFB2,TP53,PLCB1,CASS4,UBASH3B,PPM1L,GCLC,WNT5A,SOX6,DCC,CELSR2,ITGA3,ACTB,ATP6V0A1,JUP,PTPN3,ATP6V0E2,TSPYL5
12_Member	GO Biological Processes	GO:0007167	enzyme linked receptor protein signaling pathway	-5.69781	-3.07338	15/601	558,652,1969,2260,2296,2353,2591,4488,4915,7042,7157,23236,57091,84959,151742	AXL,BMP4,EPHA2,FGFR1,FOXC1,FOS,GALNT3,MSX2,NTRK2,TGFB2,TP53,PLCB1,CASS4,UBASH3B,PPM1L
12_Member	GO Biological Processes	GO:0070848	response to growth factor	-5.25999	-2.76281	13/493	652,1969,2260,2296,2353,2591,2729,4488,4915,7042,7157,7474,55553	BMP4,EPHA2,FGFR1,FOXC1,FOS,GALNT3,GCLC,MSX2,NTRK2,TGFB2,TP53,WNT5A,SOX6
12_Member	GO Biological Processes	GO:0071363	cellular response to growth factor stimulus	-4.81156	-2.44259	12/464	652,2260,2296,2353,2591,2729,4488,4915,7042,7157,7474,55553	BMP4,FGFR1,FOXC1,FOS,GALNT3,GCLC,MSX2,NTRK2,TGFB2,TP53,WNT5A,SOX6
12_Member	GO Biological Processes	GO:0001764	neuron migration	-4.07762	-1.87952	6/125	558,1630,1952,2260,3675,4915	AXL,DCC,CELSR2,FGFR1,ITGA3,NTRK2
12_Member	Reactome Gene Sets	R-HSA-9006934	Signaling by Receptor Tyrosine Kinases	-3.67672	-1.58289	11/521	60,535,558,2260,2353,2591,3675,3728,4915,5774,155066	ACTB,ATP6V0A1,AXL,FGFR1,FOS,GALNT3,ITGA3,JUP,NTRK2,PTPN3,ATP6V0E2
12_Member	GO Biological Processes	GO:0007169	transmembrane receptor protein tyrosine kinase signaling pathway	-3.27375	-1.29998	9/403	558,1969,2260,2296,2591,4915,23236,57091,84959	AXL,EPHA2,FGFR1,FOXC1,GALNT3,NTRK2,PLCB1,CASS4,UBASH3B
12_Member	GO Biological Processes	GO:0051896	regulation of protein kinase B signaling	-3.13598	-1.20925	6/187	558,1969,2260,4915,57091,85453	AXL,EPHA2,FGFR1,NTRK2,CASS4,TSPYL5
12_Member	GO Biological Processes	GO:0051897	positive regulation of protein kinase B signaling	-2.31445	-0.65137	4/119	558,2260,57091,85453	AXL,FGFR1,CASS4,TSPYL5
12_Member	GO Biological Processes	GO:0018108	peptidyl-tyrosine phosphorylation	-2.00623	-0.439145	4/146	558,1969,2260,4915	AXL,EPHA2,FGFR1,NTRK2
13_Summary	GO Biological Processes	GO:0003149	membranous septum morphogenesis	-5.00242	-2.60021	3/8	652,2535,7042,2296,4488,55506,388585,7414,23236,4214,2319,4217,6664,7286,7157,8994,257,1969,2353,60,23508,5774,146691	BMP4,FZD2,TGFB2,FOXC1,MSX2,MACROH2A2,HES5,VCL,PLCB1,MAP3K1,FLOT2,MAP3K5,SOX11,TUFT1,TP53,LIMD1,ALX3,EPHA2,FOS,ACTB,TTC9,PTPN3,TOM1L2
13_Member	GO Biological Processes	GO:0003149	membranous septum morphogenesis	-5.00242	-2.60021	3/8	652,2535,7042	BMP4,FZD2,TGFB2
13_Member	GO Biological Processes	GO:0045604	regulation of epidermal cell differentiation	-4.69344	-2.35536	5/58	652,2296,4488,55506,388585	BMP4,FOXC1,MSX2,MACROH2A2,HES5
13_Member	GO Biological Processes	GO:0030856	regulation of epithelial cell differentiation	-4.46686	-2.18463	7/157	652,2296,4488,7414,23236,55506,388585	BMP4,FOXC1,MSX2,VCL,PLCB1,MACROH2A2,HES5
13_Member	GO Biological Processes	GO:0045682	regulation of epidermis development	-4.45149	-2.17299	5/65	652,2296,4488,55506,388585	BMP4,FOXC1,MSX2,MACROH2A2,HES5
13_Member	WikiPathways	WP3927	BMP signaling in eyelid development	-3.71555	-1.60892	3/20	652,2296,4214	BMP4,FOXC1,MAP3K1
13_Member	GO Biological Processes	GO:0045661	regulation of myoblast differentiation	-3.59013	-1.51655	4/54	652,2319,4217,23236	BMP4,FLOT2,MAP3K5,PLCB1
13_Member	WikiPathways	WP4830	GDNF/RET signaling axis	-3.52969	-1.47967	3/23	652,2296,6664	BMP4,FOXC1,SOX11
13_Member	GO Biological Processes	GO:0003148	outflow tract septum morphogenesis	-3.41982	-1.39535	3/25	652,4488,7042	BMP4,MSX2,TGFB2
13_Member	GO Biological Processes	GO:0045606	positive regulation of epidermal cell differentiation	-3.31905	-1.3303	3/27	652,2296,55506	BMP4,FOXC1,MACROH2A2
13_Member	GO Biological Processes	GO:0042476	odontogenesis	-3.2308	-1.26952	5/118	652,2296,4488,7042,7286	BMP4,FOXC1,MSX2,TGFB2,TUFT1
13_Member	GO Biological Processes	GO:2000637	positive regulation of gene silencing by miRNA	-3.18209	-1.23428	3/30	652,7157,8994	BMP4,TP53,LIMD1
13_Member	GO Biological Processes	GO:1904888	cranial skeletal system development	-3.15853	-1.21668	4/70	257,652,4488,7042	ALX3,BMP4,MSX2,TGFB2
13_Member	GO Biological Processes	GO:0060148	positive regulation of posttranscriptional gene silencing	-3.1397	-1.21114	3/31	652,7157,8994	BMP4,TP53,LIMD1
13_Member	GO Biological Processes	GO:0045684	positive regulation of epidermis development	-3.09876	-1.18344	3/32	652,2296,55506	BMP4,FOXC1,MACROH2A2
13_Member	GO Biological Processes	GO:0045616	regulation of keratinocyte differentiation	-2.87897	-1.03472	3/38	2296,4488,55506	FOXC1,MSX2,MACROH2A2
13_Member	GO Biological Processes	GO:0003197	endocardial cushion development	-2.6383	-0.87368	3/46	652,4488,7042	BMP4,MSX2,TGFB2
13_Member	GO Biological Processes	GO:0045601	regulation of endothelial cell differentiation	-2.61146	-0.859169	3/47	652,7414,23236	BMP4,VCL,PLCB1
13_Member	GO Biological Processes	GO:0060964	regulation of gene silencing by miRNA	-2.5596	-0.819301	3/49	652,7157,8994	BMP4,TP53,LIMD1
13_Member	GO Biological Processes	GO:0060147	regulation of posttranscriptional gene silencing	-2.48601	-0.775665	3/52	652,7157,8994	BMP4,TP53,LIMD1
13_Member	GO Biological Processes	GO:0010718	positive regulation of epithelial to mesenchymal transition	-2.4625	-0.7563	3/53	652,2296,7042	BMP4,FOXC1,TGFB2
13_Member	GO Biological Processes	GO:0060966	regulation of gene silencing by RNA	-2.4625	-0.7563	3/53	652,7157,8994	BMP4,TP53,LIMD1
13_Member	GO Biological Processes	GO:0001503	ossification	-2.32735	-0.659184	6/271	652,1969,2296,4488,7286,8994	BMP4,EPHA2,FOXC1,MSX2,TUFT1,LIMD1
13_Member	WikiPathways	WP5053	Development of ureteric collection system	-2.31053	-0.65137	3/60	652,2296,7042	BMP4,FOXC1,TGFB2
13_Member	GO Biological Processes	GO:0060395	SMAD protein signal transduction	-2.29042	-0.637716	3/61	652,2353,7042	BMP4,FOS,TGFB2
13_Member	KEGG Pathway	hsa04919	Thyroid hormone signaling pathway	-2.28892	-0.637716	4/121	60,652,7157,23236	ACTB,BMP4,TP53,PLCB1
13_Member	GO Biological Processes	GO:0060348	bone development	-2.24932	-0.605926	5/198	652,2296,4488,7157,23508	BMP4,FOXC1,MSX2,TP53,TTC9
13_Member	GO Biological Processes	GO:0030858	positive regulation of epithelial cell differentiation	-2.21351	-0.582603	3/65	652,2296,55506	BMP4,FOXC1,MACROH2A2
13_Member	GO Biological Processes	GO:0001649	osteoblast differentiation	-2.15679	-0.542502	4/132	652,1969,4488,8994	BMP4,EPHA2,MSX2,LIMD1
13_Member	GO Biological Processes	GO:0048844	artery morphogenesis	-2.1417	-0.532212	3/69	652,2296,7042	BMP4,FOXC1,TGFB2
13_Member	GO Biological Processes	GO:0045930	negative regulation of mitotic cell cycle	-2.06939	-0.483061	5/219	652,2296,5774,7157,146691	BMP4,FOXC1,PTPN3,TP53,TOM1L2
14_Summary	KEGG Pathway	hsa05414	Dilated cardiomyopathy	-4.72275	-2.37606	6/96	60,3675,7042,7134,27092,196883,1001,3728,388585	ACTB,ITGA3,TGFB2,TNNC1,CACNG4,ADCY4,CDH3,JUP,HES5
14_Member	KEGG Pathway	hsa05414	Dilated cardiomyopathy	-4.72275	-2.37606	6/96	60,3675,7042,7134,27092,196883	ACTB,ITGA3,TGFB2,TNNC1,CACNG4,ADCY4
14_Member	KEGG Pathway	hsa05410	Hypertrophic cardiomyopathy	-3.77526	-1.65129	5/90	60,3675,7042,7134,27092	ACTB,ITGA3,TGFB2,TNNC1,CACNG4
14_Member	Reactome Gene Sets	R-HSA-418990	Adherens junctions interactions	-3.05918	-1.15965	3/33	60,1001,3728	ACTB,CDH3,JUP
14_Member	WikiPathways	WP2118	Arrhythmogenic right ventricular cardiomyopathy	-3.02412	-1.12922	4/76	60,3675,3728,27092	ACTB,ITGA3,JUP,CACNG4
14_Member	KEGG Pathway	hsa05412	Arrhythmogenic right ventricular cardiomyopathy	-3.00287	-1.12007	4/77	60,3675,3728,27092	ACTB,ITGA3,JUP,CACNG4
14_Member	WikiPathways	WP4879	Overlap between signal transduction pathways contributing to LMNA laminopathies	-2.31053	-0.65137	3/60	60,7042,388585	ACTB,TGFB2,HES5
14_Member	Reactome Gene Sets	R-HSA-421270	Cell-cell junction organization	-2.23224	-0.593973	3/64	60,1001,3728	ACTB,CDH3,JUP
15_Summary	WikiPathways	WP4540	Hippo signaling regulation pathways	-4.64654	-2.32516	6/99	1001,1969,2260,4915,8463,23236,3675,7474	CDH3,EPHA2,FGFR1,NTRK2,TEAD2,PLCB1,ITGA3,WNT5A
15_Member	WikiPathways	WP4540	Hippo signaling regulation pathways	-4.64654	-2.32516	6/99	1001,1969,2260,4915,8463,23236	CDH3,EPHA2,FGFR1,NTRK2,TEAD2,PLCB1
15_Member	WikiPathways	WP4541	Hippo-Merlin signaling dysregulation	-4.11646	-1.91279	6/123	1001,1969,2260,3675,4915,8463	CDH3,EPHA2,FGFR1,ITGA3,NTRK2,TEAD2
15_Member	GO Biological Processes	GO:0030903	notochord development	-3.85713	-1.71184	3/18	1969,7474,8463	EPHA2,WNT5A,TEAD2
15_Member	GO Biological Processes	GO:0001570	vasculogenesis	-2.1417	-0.532212	3/69	1969,4915,8463	EPHA2,NTRK2,TEAD2
16_Summary	GO Biological Processes	GO:2000736	regulation of stem cell differentiation	-4.55151	-2.25015	5/62	2296,7042,8463,55553,388585,2535,7134,7474,6664,558,652,7482,9394,23598,7092,1969,2539,7157	FOXC1,TGFB2,TEAD2,SOX6,HES5,FZD2,TNNC1,WNT5A,SOX11,AXL,BMP4,WNT2B,HS6ST1,PATZ1,TLL1,EPHA2,G6PD,TP53
16_Member	GO Biological Processes	GO:2000736	regulation of stem cell differentiation	-4.55151	-2.25015	5/62	2296,7042,8463,55553,388585	FOXC1,TGFB2,TEAD2,SOX6,HES5
16_Member	GO Biological Processes	GO:0060415	muscle tissue morphogenesis	-4.20772	-1.98488	5/73	2296,2535,7042,7134,7474	FOXC1,FZD2,TGFB2,TNNC1,WNT5A
16_Member	GO Biological Processes	GO:0048644	muscle organ morphogenesis	-4.01739	-1.85215	5/80	2296,2535,7042,7134,7474	FOXC1,FZD2,TGFB2,TNNC1,WNT5A
16_Member	GO Biological Processes	GO:2000738	positive regulation of stem cell differentiation	-3.71555	-1.60892	3/20	2296,7042,55553	FOXC1,TGFB2,SOX6
16_Member	GO Biological Processes	GO:0055008	cardiac muscle tissue morphogenesis	-3.41358	-1.39323	4/60	2296,7042,7134,7474	FOXC1,TGFB2,TNNC1,WNT5A
16_Member	GO Biological Processes	GO:0003208	cardiac ventricle morphogenesis	-3.11236	-1.18892	4/72	2296,6664,7042,7134	FOXC1,SOX11,TGFB2,TNNC1
16_Member	GO Biological Processes	GO:0055010	ventricular cardiac muscle tissue morphogenesis	-2.61146	-0.859169	3/47	2296,7042,7134	FOXC1,TGFB2,TNNC1
16_Member	GO Biological Processes	GO:0048608	reproductive structure development	-2.54211	-0.8076	8/419	558,652,2296,7042,7474,7482,9394,23598	AXL,BMP4,FOXC1,TGFB2,WNT5A,WNT2B,HS6ST1,PATZ1
16_Member	GO Biological Processes	GO:0061458	reproductive system development	-2.5233	-0.797667	8/422	558,652,2296,7042,7474,7482,9394,23598	AXL,BMP4,FOXC1,TGFB2,WNT5A,WNT2B,HS6ST1,PATZ1
16_Member	GO Biological Processes	GO:0003229	ventricular cardiac muscle tissue development	-2.39481	-0.703267	3/56	2296,7042,7134	FOXC1,TGFB2,TNNC1
16_Member	GO Biological Processes	GO:0030199	collagen fibril organization	-2.39481	-0.703267	3/56	2296,7042,7092	FOXC1,TGFB2,TLL1
16_Member	GO Biological Processes	GO:0007548	sex differentiation	-2.31202	-0.65137	6/273	558,2296,7042,7474,7482,23598	AXL,FOXC1,TGFB2,WNT5A,WNT2B,PATZ1
16_Member	GO Biological Processes	GO:0030097	hemopoiesis	-2.14245	-0.532212	9/594	558,652,1969,2539,7042,7157,7474,7482,23598	AXL,BMP4,EPHA2,G6PD,TGFB2,TP53,WNT5A,WNT2B,PATZ1
16_Member	GO Biological Processes	GO:0008584	male gonad development	-2.12299	-0.519813	4/135	7042,7474,7482,23598	TGFB2,WNT5A,WNT2B,PATZ1
16_Member	GO Biological Processes	GO:0046546	development of primary male sexual characteristics	-2.11192	-0.510306	4/136	7042,7474,7482,23598	TGFB2,WNT5A,WNT2B,PATZ1
16_Member	GO Biological Processes	GO:0008406	gonad development	-2.08559	-0.490065	5/217	2296,7042,7474,7482,23598	FOXC1,TGFB2,WNT5A,WNT2B,PATZ1
16_Member	GO Biological Processes	GO:0045137	development of primary sexual characteristics	-2.04543	-0.464416	5/222	2296,7042,7474,7482,23598	FOXC1,TGFB2,WNT5A,WNT2B,PATZ1
17_Summary	GO Biological Processes	GO:1903829	positive regulation of protein localization	-4.26834	-2.02886	11/446	1969,3675,3728,4826,7042,7474,9747,23255,25924,59353,164153,60,652,1001,4744,7134,23327,84959,80223	EPHA2,ITGA3,JUP,NNAT,TGFB2,WNT5A,TCAF1,MTCL1,MYRIP,TMEM35A,UBL4B,ACTB,BMP4,CDH3,NEFH,TNNC1,NEDD4L,UBASH3B,RAB11FIP1
17_Member	GO Biological Processes	GO:1903829	positive regulation of protein localization	-4.26834	-2.02886	11/446	1969,3675,3728,4826,7042,7474,9747,23255,25924,59353,164153	EPHA2,ITGA3,JUP,NNAT,TGFB2,WNT5A,TCAF1,MTCL1,MYRIP,TMEM35A,UBL4B
17_Member	GO Biological Processes	GO:0060341	regulation of cellular localization	-3.74781	-1.62902	14/788	60,652,1001,1969,3675,3728,4744,7134,9747,23255,23327,59353,84959,164153	ACTB,BMP4,CDH3,EPHA2,ITGA3,JUP,NEFH,TNNC1,TCAF1,MTCL1,NEDD4L,TMEM35A,UBASH3B,UBL4B
17_Member	GO Biological Processes	GO:0051222	positive regulation of protein transport	-2.8221	-0.99786	7/293	3728,4826,7042,9747,23255,25924,164153	JUP,NNAT,TGFB2,TCAF1,MTCL1,MYRIP,UBL4B
17_Member	GO Biological Processes	GO:1904951	positive regulation of establishment of protein localization	-2.69155	-0.910713	7/309	3728,4826,7042,9747,23255,25924,164153	JUP,NNAT,TGFB2,TCAF1,MTCL1,MYRIP,UBL4B
17_Member	GO Biological Processes	GO:0051223	regulation of protein transport	-2.65473	-0.884382	9/495	652,3728,4826,7042,9747,23255,25924,80223,164153	BMP4,JUP,NNAT,TGFB2,TCAF1,MTCL1,MYRIP,RAB11FIP1,UBL4B
17_Member	GO Biological Processes	GO:1905477	positive regulation of protein localization to membrane	-2.53833	-0.8076	4/103	1969,3675,9747,23255	EPHA2,ITGA3,TCAF1,MTCL1
17_Member	GO Biological Processes	GO:0070201	regulation of establishment of protein localization	-2.51264	-0.791715	9/520	652,3728,4826,7042,9747,23255,25924,80223,164153	BMP4,JUP,NNAT,TGFB2,TCAF1,MTCL1,MYRIP,RAB11FIP1,UBL4B
17_Member	GO Biological Processes	GO:1905475	regulation of protein localization to membrane	-2.50733	-0.790053	5/172	60,1969,3675,9747,23255	ACTB,EPHA2,ITGA3,TCAF1,MTCL1
17_Member	GO Biological Processes	GO:0032386	regulation of intracellular transport	-2.50384	-0.788601	7/334	652,3728,4744,7134,9747,23255,164153	BMP4,JUP,NEFH,TNNC1,TCAF1,MTCL1,UBL4B
17_Member	GO Biological Processes	GO:0033157	regulation of intracellular protein transport	-2.02969	-0.454402	5/224	652,3728,9747,23255,164153	BMP4,JUP,TCAF1,MTCL1,UBL4B
18_Summary	GO Biological Processes	GO:0034097	response to cytokine	-4.24589	-2.0098	15/799	558,970,1907,2296,2353,2729,3899,4155,4217,4744,7157,7474,9636,9641,23236,60,7414,23598,81609,84959,440275	AXL,CD70,EDN2,FOXC1,FOS,GCLC,AFF3,MBP,MAP3K5,NEFH,TP53,WNT5A,ISG15,IKBKE,PLCB1,ACTB,VCL,PATZ1,SNX27,UBASH3B,EIF2AK4
18_Member	GO Biological Processes	GO:0034097	response to cytokine	-4.24589	-2.0098	15/799	558,970,1907,2296,2353,2729,3899,4155,4217,4744,7157,7474,9636,9641,23236	AXL,CD70,EDN2,FOXC1,FOS,GCLC,AFF3,MBP,MAP3K5,NEFH,TP53,WNT5A,ISG15,IKBKE,PLCB1
18_Member	GO Biological Processes	GO:0001775	cell activation	-2.95842	-1.0903	11/636	60,558,970,1907,7157,7414,23236,23598,81609,84959,440275	ACTB,AXL,CD70,EDN2,TP53,VCL,PLCB1,PATZ1,SNX27,UBASH3B,EIF2AK4
18_Member	GO Biological Processes	GO:0034612	response to tumor necrosis factor	-2.21329	-0.582603	5/202	970,3899,4155,4217,7157	CD70,AFF3,MBP,MAP3K5,TP53
18_Member	GO Biological Processes	GO:0071345	cellular response to cytokine stimulus	-2.14091	-0.532212	10/703	558,970,1907,2296,4217,4744,7157,7474,9641,23236	AXL,CD70,EDN2,FOXC1,MAP3K5,NEFH,TP53,WNT5A,IKBKE,PLCB1
19_Summary	GO Biological Processes	GO:0071496	cellular response to external stimulus	-4.2141	-1.98488	9/301	558,2353,2729,4214,4217,7157,7482,8795,440275,7042,7474,652,4488,151742,1630,60,4155,9641,23236,1788,2539,55553,196883,535,155066,1850,57679,2260,26523,7414,1001,3675	AXL,FOS,GCLC,MAP3K1,MAP3K5,TP53,WNT2B,TNFRSF10B,EIF2AK4,TGFB2,WNT5A,BMP4,MSX2,PPM1L,DCC,ACTB,MBP,IKBKE,PLCB1,DNMT3A,G6PD,SOX6,ADCY4,ATP6V0A1,ATP6V0E2,DUSP8,ALS2,FGFR1,AGO1,VCL,CDH3,ITGA3
19_Member	GO Biological Processes	GO:0071496	cellular response to external stimulus	-4.2141	-1.98488	9/301	558,2353,2729,4214,4217,7157,7482,8795,440275	AXL,FOS,GCLC,MAP3K1,MAP3K5,TP53,WNT2B,TNFRSF10B,EIF2AK4
19_Member	GO Biological Processes	GO:1901216	positive regulation of neuron death	-3.84463	-1.70207	5/87	2353,4217,7042,7157,7474	FOS,MAP3K5,TGFB2,TP53,WNT5A
19_Member	GO Biological Processes	GO:1902893	regulation of pri-miRNA transcription by RNA polymerase II	-3.44163	-1.40881	4/59	652,2353,7042,7157	BMP4,FOS,TGFB2,TP53
19_Member	GO Biological Processes	GO:0007178	transmembrane receptor protein serine/threonine kinase signaling pathway	-3.14812	-1.21114	6/186	652,2353,4488,7042,7157,151742	BMP4,FOS,MSX2,TGFB2,TP53,PPM1L
19_Member	WikiPathways	WP4216	Chromosomal and microsatellite instability in colorectal cancer	-3.06758	-1.16295	4/74	1630,2353,7042,7157	DCC,FOS,TGFB2,TP53
19_Member	GO Biological Processes	GO:0070059	intrinsic apoptotic signaling pathway in response to endoplasmic reticulum stress	-3.05918	-1.15965	3/33	4217,7157,8795	MAP3K5,TP53,TNFRSF10B
19_Member	KEGG Pathway	hsa04210	Apoptosis	-2.95313	-1.08789	5/136	60,2353,4217,7157,8795	ACTB,FOS,MAP3K5,TP53,TNFRSF10B
19_Member	KEGG Pathway	hsa05418	Fluid shear stress and atherosclerosis	-2.91097	-1.05705	5/139	60,652,2353,4217,7157	ACTB,BMP4,FOS,MAP3K5,TP53
19_Member	GO Biological Processes	GO:0032570	response to progesterone	-2.84602	-1.01219	3/39	2353,4155,7042	FOS,MBP,TGFB2
19_Member	KEGG Pathway	hsa05210	Colorectal cancer	-2.8244	-0.998755	4/86	1630,2353,7042,7157	DCC,FOS,TGFB2,TP53
19_Member	KEGG Pathway	hsa05417	Lipid and atherosclerosis	-2.8243	-0.998755	6/215	2353,4217,7157,8795,9641,23236	FOS,MAP3K5,TP53,TNFRSF10B,IKBKE,PLCB1
19_Member	GO Biological Processes	GO:0009991	response to extracellular stimulus	-2.8069	-0.988095	9/470	558,1788,2353,2539,2729,4217,7157,7482,440275	AXL,DNMT3A,FOS,G6PD,GCLC,MAP3K5,TP53,WNT2B,EIF2AK4
19_Member	GO Biological Processes	GO:0071560	cellular response to transforming growth factor beta stimulus	-2.76496	-0.953569	5/150	2353,7042,7157,7474,55553	FOS,TGFB2,TP53,WNT5A,SOX6
19_Member	KEGG Pathway	hsa05166	Human T-cell leukemia virus 1 infection	-2.75395	-0.945952	6/222	2353,4214,4488,7042,7157,196883	FOS,MAP3K1,MSX2,TGFB2,TP53,ADCY4
19_Member	WikiPathways	WP1772	Apoptosis modulation and signaling	-2.69948	-0.913894	4/93	2353,4217,7157,8795	FOS,MAP3K5,TP53,TNFRSF10B
19_Member	KEGG Pathway	hsa05323	Rheumatoid arthritis	-2.69948	-0.913894	4/93	535,2353,7042,155066	ATP6V0A1,FOS,TGFB2,ATP6V0E2
19_Member	GO Biological Processes	GO:0071559	response to transforming growth factor beta	-2.6784	-0.90109	5/157	2353,7042,7157,7474,55553	FOS,TGFB2,TP53,WNT5A,SOX6
19_Member	GO Biological Processes	GO:1902895	positive regulation of pri-miRNA transcription by RNA polymerase II	-2.66579	-0.893071	3/45	2353,7042,7157	FOS,TGFB2,TP53
19_Member	KEGG Pathway	hsa05161	Hepatitis B	-2.6193	-0.86033	5/162	2353,4214,7042,7157,9641	FOS,MAP3K1,TGFB2,TP53,IKBKE
19_Member	GO Biological Processes	GO:0031668	cellular response to extracellular stimulus	-2.61189	-0.859169	6/237	558,2353,4217,7157,7482,440275	AXL,FOS,MAP3K5,TP53,WNT2B,EIF2AK4
19_Member	WikiPathways	WP3611	Photodynamic therapy-induced AP-1 survival signaling	-2.51001	-0.791715	3/51	2353,4217,7157	FOS,MAP3K5,TP53
19_Member	GO Biological Processes	GO:0007568	aging	-2.35844	-0.682003	6/267	1788,2353,2729,4155,4217,7157	DNMT3A,FOS,GCLC,MBP,MAP3K5,TP53
19_Member	Canonical Pathways	M166	PID ATF2 PATHWAY	-2.331	-0.660097	3/59	1850,2353,7042	DUSP8,FOS,TGFB2
19_Member	GO Biological Processes	GO:0006979	response to oxidative stress	-2.29483	-0.638343	7/365	558,2353,2539,2729,4217,7157,57679	AXL,FOS,G6PD,GCLC,MAP3K5,TP53,ALS2
19_Member	WikiPathways	WP4155	Endometrial cancer	-2.25129	-0.607036	3/63	2260,2353,7157	FGFR1,FOS,TP53
19_Member	Reactome Gene Sets	R-HSA-2559580	Oxidative Stress Induced Senescence	-2.23931	-0.596773	4/125	2353,4217,7157,26523	FOS,MAP3K5,TP53,AGO1
19_Member	WikiPathways	WP4685	Melanoma	-2.15921	-0.542502	3/68	2353,7157,7414	FOS,TP53,VCL
19_Member	GO Biological Processes	GO:0009410	response to xenobiotic stimulus	-2.07976	-0.486653	7/401	1001,1788,2353,2729,3675,7042,7157	CDH3,DNMT3A,FOS,GCLC,ITGA3,TGFB2,TP53
19_Member	GO Biological Processes	GO:0034599	cellular response to oxidative stress	-2.07746	-0.486653	5/218	558,2353,2539,4217,7157	AXL,FOS,G6PD,MAP3K5,TP53
20_Summary	GO Biological Processes	GO:0043588	skin development	-4.1928	-1.97645	8/235	1001,1969,3675,3728,7042,7474,9355,60529,2319,4915,5158	CDH3,EPHA2,ITGA3,JUP,TGFB2,WNT5A,LHX2,ALX4,FLOT2,NTRK2,PDE6B
20_Member	GO Biological Processes	GO:0043588	skin development	-4.1928	-1.97645	8/235	1001,1969,3675,3728,7042,7474,9355,60529	CDH3,EPHA2,ITGA3,JUP,TGFB2,WNT5A,LHX2,ALX4
20_Member	GO Biological Processes	GO:0022404	molting cycle process	-2.96126	-1.0917	4/79	1001,7042,9355,60529	CDH3,TGFB2,LHX2,ALX4
20_Member	GO Biological Processes	GO:0022405	hair cycle process	-2.96126	-1.0917	4/79	1001,7042,9355,60529	CDH3,TGFB2,LHX2,ALX4
20_Member	GO Biological Processes	GO:0008544	epidermis development	-2.93492	-1.07254	7/280	1001,1969,2319,7042,7474,9355,60529	CDH3,EPHA2,FLOT2,TGFB2,WNT5A,LHX2,ALX4
20_Member	GO Biological Processes	GO:0042303	molting cycle	-2.71666	-0.921428	4/92	1001,7042,9355,60529	CDH3,TGFB2,LHX2,ALX4
20_Member	GO Biological Processes	GO:0042633	hair cycle	-2.71666	-0.921428	4/92	1001,7042,9355,60529	CDH3,TGFB2,LHX2,ALX4
20_Member	GO Biological Processes	GO:0001942	hair follicle development	-2.04227	-0.46438	3/75	7042,9355,60529	TGFB2,LHX2,ALX4
20_Member	GO Biological Processes	GO:0060041	retina development in camera-type eye	-2.02667	-0.454402	4/144	4915,5158,7042,9355	NTRK2,PDE6B,TGFB2,LHX2
