# Supplementary material for: Transcriptional profiling of Hutchinson-Gilford Progeria syndrome fibroblasts reveals deficits in mesenchymal stem cell commitment to differentiation related to early events in endochondral ossification
Source: eLife journal article supplement (doi:10.7554/elife.81290), 2022-12-29
Supplement: table2-data1 [file metascape_result.xlsx]

## Sheet: Annotation
MyList	Gene ID	Type	Tax ID	Homologene Gene ID	Homologene Gene Tax ID	Gene Symbol	Description	Biological Process (GO)	Kinase Class (UniProt)	Protein Function (Protein Atlas)	Subcellular Location (Protein Atlas)	Drug (DrugBank)	Canonical Pathways	Hallmark Gene Sets	R-HSA-3214815 HDACs deacetylate histones	R-HSA-5689880 Ub-specific processing proteas	R-HSA-1266695 Interleukin-7 signaling	R-HSA-8866654 E3 ubiquitin ligases ubiquitin	R-HSA-140342 Apoptosis induced DNA fragment	R-HSA-5628897 TP53 Regulates Metabolic Genes	GO:0060411 cardiac septum morphogenesis	GO:0006518 peptide metabolic process	hsa05200 Pathways in cancer	hsa04390 Hippo signaling pathway	R-HSA-4086398 Ca2+ pathway	R-HSA-112316 Neuronal System	GO:0072132 mesenchyme morphogenesis	GO:0048736 appendage development	GO:1901214 regulation of neuron death	GO:0021537 telencephalon development	GO:0045454 cell redox homeostasis	GO:0051963 regulation of synapse assembly	GO:0070585 protein localization to mitoch	WP2447 Amyotrophic lateral sclerosis
RMRP	6023	symbol	H. sapiens	6023	H. sapiens	RMRP	RNA component of mitochondrial RNA processing endoribonuclease	GO:0062103 double-stranded RNA biosynthetic process;GO:1903704 negative regulation of production of siRNA involved in RNA interference;GO:1900369 negative regulation of RNA interference							1.0	0.0	0.0	0.0	0.0	0.0	0.0	0.0	0.0	0.0	1.0	0.0	0.0	0.0	0.0	0.0	0.0	0.0	0.0	0.0
RPPH1	85495	symbol	H. sapiens	85495	H. sapiens	RPPH1	ribonuclease P RNA component H1	GO:0090502 RNA phosphodiester bond hydrolysis, endonucleolytic;GO:0008033 tRNA processing;GO:0090501 RNA phosphodiester bond hydrolysis							0.0	0.0	0.0	0.0	0.0	0.0	0.0	0.0	0.0	0.0	0.0	0.0	0.0	0.0	0.0	0.0	0.0	0.0	0.0	0.0
SNORA73B	26768	symbol	H. sapiens	26768	H. sapiens	SNORA73B	small nucleolar RNA, H/ACA box 73B	GO:0006396 RNA processing;GO:0016070 RNA metabolic process;GO:0010467 gene expression							0.0	0.0	0.0	0.0	0.0	0.0	0.0	0.0	0.0	0.0	0.0	0.0	0.0	0.0	0.0	0.0	0.0	0.0	0.0	0.0
ANKRD30BL	554226	symbol	H. sapiens	554226	H. sapiens	ANKRD30BL	ankyrin repeat domain 30B like			Predicted intracellular proteins					0.0	0.0	0.0	0.0	0.0	0.0	0.0	0.0	0.0	0.0	0.0	0.0	0.0	0.0	0.0	0.0	0.0	0.0	0.0	0.0
HIST1H3H	8357	gene_synonym	H. sapiens	8357	H. sapiens	H3C10	H3 clustered histone 10	GO:0006335 DNA replication-dependent chromatin assembly;GO:0034723 DNA replication-dependent chromatin organization;GO:0032200 telomere organization		Predicted intracellular proteins; Disease related genes					1.0	0.0	1.0	0.0	0.0	0.0	0.0	0.0	0.0	0.0	0.0	0.0	0.0	0.0	0.0	0.0	0.0	0.0	0.0	0.0
SNORA48	652965	symbol	H. sapiens	652965	H. sapiens	SNORA48	small nucleolar RNA, H/ACA box 48	GO:0006396 RNA processing;GO:0016070 RNA metabolic process;GO:0010467 gene expression							0.0	0.0	0.0	0.0	0.0	0.0	0.0	0.0	0.0	0.0	0.0	0.0	0.0	0.0	0.0	0.0	0.0	0.0	0.0	0.0
HIST2H3D	653604	gene_synonym	H. sapiens	653604	H. sapiens	H3C13	H3 clustered histone 13	GO:0006334 nucleosome assembly;GO:0031497 chromatin assembly;GO:0034728 nucleosome organization		Predicted intracellular proteins					1.0	0.0	1.0	0.0	0.0	0.0	0.0	0.0	0.0	0.0	0.0	0.0	0.0	0.0	0.0	0.0	0.0	0.0	0.0	0.0
HIST1H4H	8365	gene_synonym	H. sapiens	8365	H. sapiens	H4C8	H4 clustered histone 8	GO:0045653 negative regulation of megakaryocyte differentiation;GO:0006335 DNA replication-dependent chromatin assembly;GO:0034723 DNA replication-dependent chromatin organization		Predicted intracellular proteins; Disease related genes					1.0	0.0	0.0	0.0	0.0	0.0	0.0	0.0	0.0	0.0	0.0	0.0	0.0	0.0	0.0	0.0	0.0	0.0	0.0	0.0
HIST1H1B	3009	gene_synonym	H. sapiens	3009	H. sapiens	H1-5	H1.5 linker histone, cluster member	GO:0071169 establishment of protein localization to chromatin;GO:0051574 positive regulation of histone H3-K9 methylation;GO:0070199 establishment of protein localization to chromosome		Predicted intracellular proteins	Nucleoplasm (Supported)				1.0	0.0	0.0	0.0	1.0	0.0	0.0	0.0	0.0	0.0	0.0	0.0	0.0	0.0	0.0	0.0	0.0	0.0	0.0	0.0
HIST1H2AI	8329	gene_synonym	H. sapiens	8329	H. sapiens	H2AC13	H2A clustered histone 13	GO:0008150 biological_process		Predicted intracellular proteins	Nucleoplasm (Approved)				1.0	1.0	0.0	0.0	0.0	0.0	0.0	0.0	0.0	0.0	0.0	0.0	0.0	0.0	0.0	0.0	0.0	0.0	0.0	0.0
HIST1H1E	3008	gene_synonym	H. sapiens	3008	H. sapiens	H1-4	H1.4 linker histone, cluster member	GO:0098532 histone H3-K27 trimethylation;GO:0070734 histone H3-K27 methylation;GO:0016584 nucleosome positioning		Predicted intracellular proteins; Disease related genes	Nuclear speckles (Supported)	Copper	(M32)PID HDAC CLASSIII PATHWAY		1.0	0.0	0.0	1.0	1.0	0.0	0.0	0.0	0.0	0.0	0.0	0.0	0.0	0.0	0.0	0.0	0.0	0.0	0.0	0.0
HIST1H3D	8351	gene_synonym	H. sapiens	8351	H. sapiens	H3C4	H3 clustered histone 4	GO:0006335 DNA replication-dependent chromatin assembly;GO:0034723 DNA replication-dependent chromatin organization;GO:0032200 telomere organization		Predicted intracellular proteins; Disease related genes					1.0	0.0	1.0	1.0	0.0	0.0	0.0	0.0	0.0	0.0	0.0	0.0	0.0	0.0	0.0	0.0	0.0	0.0	0.0	0.0
HIST1H2AG	8969	gene_synonym	H. sapiens	8969	H. sapiens	H2AC11	H2A clustered histone 11	GO:0008150 biological_process		Predicted intracellular proteins	Nucleoplasm (Approved)				1.0	1.0	0.0	0.0	0.0	0.0	0.0	0.0	0.0	0.0	0.0	0.0	0.0	0.0	0.0	0.0	0.0	0.0	0.0	0.0
HIST1H2AD	3013	gene_synonym	H. sapiens	3013	H. sapiens	H2AC7	H2A clustered histone 7	GO:0008150 biological_process		Predicted intracellular proteins	Nucleoplasm (Approved)				1.0	1.0	0.0	0.0	0.0	0.0	0.0	0.0	0.0	0.0	0.0	0.0	0.0	0.0	0.0	0.0	0.0	0.0	0.0	0.0
SNORD17	692086	symbol	H. sapiens	692086	H. sapiens	SNORD17	small nucleolar RNA, C/D box 17	GO:0006396 RNA processing;GO:0016070 RNA metabolic process;GO:0010467 gene expression							0.0	0.0	0.0	0.0	0.0	0.0	0.0	0.0	0.0	0.0	0.0	0.0	0.0	0.0	0.0	0.0	0.0	0.0	0.0	0.0
HIST1H2AE	3012	gene_synonym	H. sapiens	3012	H. sapiens	H2AC8	H2A clustered histone 8	GO:0008285 negative regulation of cell population proliferation;GO:0042127 regulation of cell population proliferation;GO:0048523 negative regulation of cellular process		Predicted intracellular proteins	Nucleoplasm (Supported)				1.0	1.0	0.0	0.0	0.0	0.0	0.0	0.0	0.0	0.0	0.0	0.0	0.0	0.0	0.0	0.0	0.0	0.0	0.0	0.0
HIST1H3E	8353	gene_synonym	H. sapiens	8353	H. sapiens	H3C6	H3 clustered histone 6	GO:0006335 DNA replication-dependent chromatin assembly;GO:0034723 DNA replication-dependent chromatin organization;GO:0032200 telomere organization		Predicted intracellular proteins; Disease related genes					1.0	0.0	1.0	0.0	0.0	0.0	0.0	0.0	0.0	0.0	0.0	0.0	0.0	0.0	0.0	0.0	0.0	0.0	0.0	0.0
HMX3	340784	symbol	H. sapiens	340784	H. sapiens	HMX3	H6 family homeobox 3	GO:0007566 embryo implantation;GO:0050885 neuromuscular process controlling balance;GO:0060135 maternal process involved in female pregnancy		Transcription factors:Helix-turn-helix domains; Predicted intracellular proteins	Nucleoplasm (Approved); Additional: Centriolar satellite				0.0	0.0	0.0	0.0	0.0	0.0	1.0	0.0	0.0	0.0	0.0	0.0	0.0	0.0	0.0	1.0	0.0	0.0	0.0	0.0
SNORA49	677829	symbol	H. sapiens	677829	H. sapiens	SNORA49	small nucleolar RNA, H/ACA box 49	GO:0006396 RNA processing;GO:0016070 RNA metabolic process;GO:0010467 gene expression							0.0	0.0	0.0	0.0	0.0	0.0	0.0	0.0	0.0	0.0	0.0	0.0	0.0	0.0	0.0	0.0	0.0	0.0	0.0	0.0
HIST1H3C	8352	gene_synonym	H. sapiens	8352	H. sapiens	H3C3	H3 clustered histone 3	GO:0006335 DNA replication-dependent chromatin assembly;GO:0034723 DNA replication-dependent chromatin organization;GO:0032200 telomere organization		Predicted intracellular proteins; Disease related genes					1.0	0.0	1.0	0.0	0.0	0.0	0.0	0.0	0.0	0.0	0.0	0.0	0.0	0.0	0.0	0.0	0.0	0.0	0.0	0.0
HIST1H4K	8362	gene_synonym	H. sapiens	8362	H. sapiens	H4C12	H4 clustered histone 12	GO:0045653 negative regulation of megakaryocyte differentiation;GO:0006335 DNA replication-dependent chromatin assembly;GO:0034723 DNA replication-dependent chromatin organization		Predicted intracellular proteins; Disease related genes					1.0	0.0	0.0	0.0	0.0	0.0	0.0	0.0	0.0	0.0	0.0	0.0	0.0	0.0	0.0	0.0	0.0	0.0	0.0	0.0
HIST1H2AM	8336	gene_synonym	H. sapiens	8336	H. sapiens	H2AC17	H2A clustered histone 17	GO:0008150 biological_process		Predicted intracellular proteins	Nucleoplasm (Approved)				1.0	1.0	0.0	0.0	0.0	0.0	0.0	0.0	0.0	0.0	0.0	0.0	0.0	0.0	0.0	0.0	0.0	0.0	0.0	0.0
HIST1H4C	8364	gene_synonym	H. sapiens	8364	H. sapiens	H4C3	H4 clustered histone 3	GO:0045653 negative regulation of megakaryocyte differentiation;GO:0006335 DNA replication-dependent chromatin assembly;GO:0034723 DNA replication-dependent chromatin organization		Predicted intracellular proteins; Disease related genes				(M5945)HALLMARK HEME METABOLISM	1.0	0.0	0.0	0.0	0.0	0.0	0.0	0.0	0.0	0.0	0.0	0.0	0.0	0.0	0.0	0.0	0.0	0.0	0.0	0.0
HIST1H2BC	3017	gene_synonym	H. sapiens	3017	H. sapiens	H2BC5	H2B clustered histone 5	GO:0006334 nucleosome assembly;GO:0031497 chromatin assembly;GO:0034728 nucleosome organization		Predicted intracellular proteins	Nucleoplasm (Approved); Additional: Cytosol				1.0	1.0	0.0	1.0	0.0	0.0	0.0	0.0	0.0	0.0	0.0	0.0	0.0	0.0	0.0	0.0	0.0	0.0	0.0	0.0
SNORA63	6043	symbol	H. sapiens	6043	H. sapiens	SNORA63	small nucleolar RNA, H/ACA box 63	GO:0006396 RNA processing;GO:0016070 RNA metabolic process;GO:0010467 gene expression							0.0	0.0	0.0	0.0	0.0	0.0	0.0	0.0	0.0	0.0	0.0	0.0	0.0	0.0	0.0	0.0	0.0	0.0	0.0	0.0
HIST2H2AC	8338	gene_synonym	H. sapiens	8338	H. sapiens	H2AC20	H2A clustered histone 20	GO:0008150 biological_process		Predicted intracellular proteins	Nucleoplasm (Approved)				1.0	1.0	0.0	0.0	0.0	0.0	0.0	0.0	0.0	0.0	0.0	0.0	0.0	0.0	0.0	0.0	0.0	0.0	0.0	0.0
SCARNA12	677777	symbol	H. sapiens	677777	H. sapiens	SCARNA12	small Cajal body-specific RNA 12	GO:0006396 RNA processing;GO:0016070 RNA metabolic process;GO:0010467 gene expression							0.0	0.0	0.0	0.0	0.0	0.0	0.0	0.0	0.0	0.0	0.0	0.0	0.0	0.0	0.0	0.0	0.0	0.0	0.0	0.0
SCARNA5	677775	symbol	H. sapiens	677775	H. sapiens	SCARNA5	small Cajal body-specific RNA 5	GO:0006396 RNA processing;GO:0016070 RNA metabolic process;GO:0010467 gene expression							0.0	0.0	0.0	0.0	0.0	0.0	0.0	0.0	0.0	0.0	0.0	0.0	0.0	0.0	0.0	0.0	0.0	0.0	0.0	0.0
HIST1H2BH	8345	gene_synonym	H. sapiens	8345	H. sapiens	H2BC9	H2B clustered histone 9	GO:0006334 nucleosome assembly;GO:0031497 chromatin assembly;GO:0034728 nucleosome organization		Predicted intracellular proteins	Nucleoplasm (Approved); Additional: Cytosol				1.0	1.0	0.0	1.0	0.0	0.0	0.0	0.0	0.0	0.0	0.0	0.0	0.0	0.0	0.0	0.0	0.0	0.0	0.0	0.0
HIST1H3G	8355	gene_synonym	H. sapiens	8355	H. sapiens	H3C8	H3 clustered histone 8	GO:0006335 DNA replication-dependent chromatin assembly;GO:0034723 DNA replication-dependent chromatin organization;GO:0032200 telomere organization		Predicted intracellular proteins; Disease related genes					1.0	0.0	1.0	0.0	0.0	0.0	0.0	0.0	0.0	0.0	0.0	0.0	0.0	0.0	0.0	0.0	0.0	0.0	0.0	0.0
TSPAN5	10098	symbol	H. sapiens	10098	H. sapiens	TSPAN5	tetraspanin 5	GO:0045747 positive regulation of Notch signaling pathway;GO:0008593 regulation of Notch signaling pathway;GO:0072659 protein localization to plasma membrane						(M5945)HALLMARK HEME METABOLISM	1.0	0.0	0.0	0.0	0.0	0.0	0.0	0.0	0.0	0.0	0.0	0.0	0.0	0.0	0.0	0.0	0.0	0.0	0.0	0.0
HIST1H2BO	8348	gene_synonym	H. sapiens	8348	H. sapiens	H2BC17	H2B clustered histone 17	GO:0006334 nucleosome assembly;GO:0031497 chromatin assembly;GO:0034728 nucleosome organization		Predicted intracellular proteins	Nucleoplasm (Approved); Additional: Cytosol				1.0	1.0	0.0	1.0	0.0	0.0	0.0	0.0	0.0	0.0	0.0	0.0	0.0	0.0	0.0	0.0	0.0	0.0	0.0	0.0
HIST1H4E	8367	gene_synonym	H. sapiens	8367	H. sapiens	H4C5	H4 clustered histone 5	GO:0045653 negative regulation of megakaryocyte differentiation;GO:0006335 DNA replication-dependent chromatin assembly;GO:0034723 DNA replication-dependent chromatin organization		Predicted intracellular proteins; Disease related genes					1.0	0.0	0.0	0.0	0.0	0.0	0.0	0.0	0.0	0.0	0.0	0.0	0.0	0.0	0.0	0.0	0.0	0.0	0.0	0.0
MRPS24	64951	symbol	H. sapiens	64951	H. sapiens	MRPS24	mitochondrial ribosomal protein S24	GO:0032543 mitochondrial translation;GO:0140053 mitochondrial gene expression;GO:0006412 translation		Ribosomal proteins; Predicted intracellular proteins					0.0	0.0	0.0	0.0	0.0	0.0	0.0	1.0	0.0	0.0	0.0	0.0	0.0	0.0	0.0	0.0	0.0	0.0	0.0	0.0
SLC7A5P2	387254	symbol	H. sapiens	387254	H. sapiens	SLC7A5P2	solute carrier family 7 member 5 pseudogene 2	GO:1902475 L-alpha-amino acid transmembrane transport;GO:0015807 L-amino acid transport;GO:0003333 amino acid transmembrane transport							0.0	0.0	0.0	0.0	0.0	0.0	0.0	0.0	0.0	0.0	0.0	0.0	0.0	0.0	0.0	0.0	0.0	0.0	0.0	0.0
HIST1H2BG	3017	gene_synonym	H. sapiens	3017	H. sapiens	H2BC5	H2B clustered histone 5	GO:0006334 nucleosome assembly;GO:0031497 chromatin assembly;GO:0034728 nucleosome organization		Predicted intracellular proteins	Nucleoplasm (Approved); Additional: Cytosol				1.0	1.0	0.0	1.0	0.0	0.0	0.0	0.0	0.0	0.0	0.0	0.0	0.0	0.0	0.0	0.0	0.0	0.0	0.0	0.0
HIST1H2BJ	8970	gene_synonym	H. sapiens	8970	H. sapiens	H2BC11	H2B clustered histone 11	GO:0002227 innate immune response in mucosa;GO:0010804 negative regulation of tumor necrosis factor-mediated signaling pathway;GO:0002385 mucosal immune response		Predicted intracellular proteins	Nucleoplasm (Approved); Additional: Cytosol				1.0	1.0	0.0	1.0	0.0	0.0	0.0	0.0	0.0	0.0	0.0	0.0	0.0	0.0	0.0	0.0	0.0	0.0	0.0	0.0
SNORA57	692158	symbol	H. sapiens	692158	H. sapiens	SNORA57	small nucleolar RNA, H/ACA box 57	GO:0006396 RNA processing;GO:0016070 RNA metabolic process;GO:0010467 gene expression							0.0	0.0	0.0	0.0	0.0	0.0	0.0	0.0	0.0	0.0	0.0	0.0	0.0	0.0	0.0	0.0	0.0	0.0	0.0	0.0
HIST2H2BE	8349	gene_synonym	H. sapiens	8349	H. sapiens	H2BC21	H2B clustered histone 21	GO:0002227 innate immune response in mucosa;GO:0002385 mucosal immune response;GO:0002251 organ or tissue specific immune response		Predicted intracellular proteins	Nucleoplasm (Approved); Additional: Cytosol				1.0	1.0	0.0	0.0	0.0	0.0	0.0	0.0	0.0	0.0	0.0	0.0	0.0	0.0	0.0	0.0	0.0	0.0	0.0	0.0
ZNF460	10794	symbol	H. sapiens	10794	H. sapiens	ZNF460	zinc finger protein 460	GO:0006357 regulation of transcription by RNA polymerase II;GO:0006355 regulation of transcription, DNA-templated;GO:1903506 regulation of nucleic acid-templated transcription		Predicted intracellular proteins; Transcription factors:Zinc-coordinating DNA-binding domains	Nucleoplasm (Approved)				0.0	0.0	0.0	0.0	0.0	0.0	0.0	0.0	0.0	0.0	0.0	0.0	0.0	0.0	0.0	0.0	0.0	0.0	0.0	0.0
HIST1H3B	8358	gene_synonym	H. sapiens	8358	H. sapiens	H3C2	H3 clustered histone 2	GO:0006335 DNA replication-dependent chromatin assembly;GO:0034723 DNA replication-dependent chromatin organization;GO:0032200 telomere organization		Predicted intracellular proteins; Cancer-related genes; Disease related genes					1.0	0.0	1.0	0.0	0.0	0.0	0.0	0.0	0.0	0.0	0.0	0.0	0.0	0.0	0.0	0.0	0.0	0.0	0.0	0.0
HIST1H2AC	8334	gene_synonym	H. sapiens	8334	H. sapiens	H2AC6	H2A clustered histone 6	GO:0008285 negative regulation of cell population proliferation;GO:0042127 regulation of cell population proliferation;GO:0048523 negative regulation of cellular process		Predicted intracellular proteins; Cancer-related genes:Candidate cancer biomarkers	Nucleoplasm (Approved)				1.0	1.0	0.0	0.0	0.0	0.0	0.0	0.0	0.0	0.0	0.0	0.0	0.0	0.0	0.0	0.0	0.0	0.0	0.0	0.0
SNORA52	619565	symbol	H. sapiens	619565	H. sapiens	SNORA52	small nucleolar RNA, H/ACA box 52	GO:0006396 RNA processing;GO:0016070 RNA metabolic process;GO:0010467 gene expression							0.0	0.0	0.0	0.0	0.0	0.0	0.0	0.0	0.0	0.0	0.0	0.0	0.0	0.0	0.0	0.0	0.0	0.0	0.0	0.0
HIST1H1D	3007	gene_synonym	H. sapiens	3007	H. sapiens	H1-3	H1.3 linker histone, cluster member	GO:0098532 histone H3-K27 trimethylation;GO:0070734 histone H3-K27 methylation;GO:0016584 nucleosome positioning		Predicted intracellular proteins					1.0	0.0	0.0	0.0	1.0	0.0	0.0	1.0	0.0	0.0	0.0	0.0	0.0	0.0	0.0	0.0	0.0	0.0	0.0	0.0
SCARNA2	677766	symbol	H. sapiens	677766	H. sapiens	SCARNA2	small Cajal body-specific RNA 2	GO:0006396 RNA processing;GO:0016070 RNA metabolic process;GO:0010467 gene expression							0.0	0.0	0.0	0.0	0.0	0.0	0.0	0.0	0.0	0.0	0.0	0.0	0.0	0.0	0.0	0.0	0.0	0.0	0.0	0.0
LIMD1	8994	symbol	H. sapiens	8994	H. sapiens	LIMD1	LIM domain containing 1	GO:0035331 negative regulation of hippo signaling;GO:0033962 P-body assembly;GO:0002076 osteoblast development		Predicted intracellular proteins	Focal adhesion sites;Nucleoplasm (Supported)				1.0	0.0	0.0	0.0	0.0	0.0	0.0	0.0	0.0	1.0	1.0	0.0	0.0	1.0	0.0	0.0	0.0	0.0	0.0	0.0
DSCAM	1826	symbol	H. sapiens	1826	H. sapiens	DSCAM	DS cell adhesion molecule	GO:0060060 post-embryonic retina morphogenesis in camera-type eye;GO:0048842 positive regulation of axon extension involved in axon guidance;GO:0038007 netrin-activated signaling pathway			Golgi apparatus (Approved)		(M285)PID HNF3A PATHWAY; (M200)PID ERA GENOMIC PATHWAY		0.0	0.0	0.0	0.0	0.0	0.0	1.0	0.0	0.0	0.0	0.0	0.0	0.0	0.0	0.0	0.0	0.0	0.0	0.0	0.0
HIST1H2AH	85235	gene_synonym	H. sapiens	85235	H. sapiens	H2AC12	H2A clustered histone 12	GO:0008150 biological_process		Predicted intracellular proteins	Nucleoplasm (Approved)				1.0	1.0	0.0	0.0	0.0	0.0	0.0	0.0	0.0	0.0	0.0	0.0	0.0	0.0	0.0	0.0	0.0	0.0	0.0	0.0
HIST1H2AK	8330	gene_synonym	H. sapiens	8330	H. sapiens	H2AC15	H2A clustered histone 15	GO:0008150 biological_process		Predicted intracellular proteins	Nucleoplasm (Approved)				1.0	1.0	0.0	0.0	0.0	0.0	0.0	0.0	0.0	0.0	0.0	0.0	0.0	0.0	0.0	0.0	0.0	0.0	0.0	0.0
HIST1H2BL	8340	gene_synonym	H. sapiens	8340	H. sapiens	H2BC13	H2B clustered histone 13	GO:0006334 nucleosome assembly;GO:0031497 chromatin assembly;GO:0034728 nucleosome organization		Predicted intracellular proteins	Nucleoplasm (Approved); Additional: Cytosol				1.0	1.0	0.0	1.0	0.0	0.0	0.0	0.0	0.0	0.0	0.0	0.0	0.0	0.0	0.0	0.0	0.0	0.0	0.0	0.0
HIST1H4D	8360	gene_synonym	H. sapiens	8360	H. sapiens	H4C4	H4 clustered histone 4	GO:0045653 negative regulation of megakaryocyte differentiation;GO:0006335 DNA replication-dependent chromatin assembly;GO:0034723 DNA replication-dependent chromatin organization		Predicted intracellular proteins; Disease related genes					1.0	0.0	0.0	0.0	0.0	0.0	0.0	0.0	0.0	0.0	0.0	0.0	0.0	0.0	0.0	0.0	0.0	0.0	0.0	0.0
ZBTB46	140685	symbol	H. sapiens	140685	H. sapiens	ZBTB46	zinc finger and BTB domain containing 46	GO:2001200 positive regulation of dendritic cell differentiation;GO:2001199 negative regulation of dendritic cell differentiation;GO:0045650 negative regulation of macrophage differentiation		Predicted intracellular proteins; Transcription factors:Zinc-coordinating DNA-binding domains	Nucleoplasm (Approved)				1.0	0.0	0.0	0.0	0.0	0.0	0.0	0.0	0.0	0.0	0.0	0.0	0.0	0.0	0.0	0.0	0.0	0.0	0.0	0.0
RBMXL2	27288	symbol	H. sapiens	27288	H. sapiens	RBMXL2	RBMX like 2	GO:0000377 RNA splicing, via transesterification reactions with bulged adenosine as nucleophile;GO:0000398 mRNA splicing, via spliceosome;GO:0000375 RNA splicing, via transesterification reactions		Predicted intracellular proteins					0.0	0.0	0.0	0.0	0.0	0.0	0.0	0.0	0.0	0.0	0.0	0.0	0.0	0.0	0.0	0.0	0.0	0.0	0.0	0.0
HIST1H2BD	3017	gene_synonym	H. sapiens	3017	H. sapiens	H2BC5	H2B clustered histone 5	GO:0006334 nucleosome assembly;GO:0031497 chromatin assembly;GO:0034728 nucleosome organization		Predicted intracellular proteins	Nucleoplasm (Approved); Additional: Cytosol				1.0	1.0	0.0	1.0	0.0	0.0	0.0	0.0	0.0	0.0	0.0	0.0	0.0	0.0	0.0	0.0	0.0	0.0	0.0	0.0
HIST2H2BF	440689	gene_synonym	H. sapiens	440689	H. sapiens	H2BC18	H2B clustered histone 18	GO:0006334 nucleosome assembly;GO:0031497 chromatin assembly;GO:0034728 nucleosome organization		Predicted intracellular proteins	Nucleoplasm (Approved); Additional: Cytosol				1.0	1.0	0.0	0.0	0.0	0.0	0.0	0.0	0.0	0.0	0.0	0.0	0.0	0.0	0.0	0.0	0.0	0.0	0.0	0.0
HIST1H2BI	3017	gene_synonym	H. sapiens	3017	H. sapiens	H2BC5	H2B clustered histone 5	GO:0006334 nucleosome assembly;GO:0031497 chromatin assembly;GO:0034728 nucleosome organization		Predicted intracellular proteins	Nucleoplasm (Approved); Additional: Cytosol				1.0	1.0	0.0	1.0	0.0	0.0	0.0	0.0	0.0	0.0	0.0	0.0	0.0	0.0	0.0	0.0	0.0	0.0	0.0	0.0
HIST1H3J	8356	gene_synonym	H. sapiens	8356	H. sapiens	H3C12	H3 clustered histone 12	GO:0006335 DNA replication-dependent chromatin assembly;GO:0034723 DNA replication-dependent chromatin organization;GO:0032200 telomere organization		Predicted intracellular proteins; Disease related genes					1.0	0.0	1.0	0.0	0.0	0.0	0.0	0.0	0.0	0.0	0.0	0.0	0.0	0.0	0.0	0.0	0.0	0.0	0.0	0.0
ADAMTS8	11095	symbol	H. sapiens	11095	H. sapiens	ADAMTS8	ADAM metallopeptidase with thrombospondin type 1 motif 8	GO:0035435 phosphate ion transmembrane transport;GO:0006817 phosphate ion transport;GO:0098661 inorganic anion transmembrane transport		Predicted secreted proteins; Cancer-related genes:Candidate cancer biomarkers			(M3468)NABA ECM REGULATORS; (M5885)NABA MATRISOME ASSOCIATED; (M5889)NABA MATRISOME		0.0	0.0	0.0	0.0	0.0	0.0	0.0	0.0	0.0	0.0	0.0	0.0	0.0	0.0	0.0	0.0	0.0	0.0	0.0	0.0
SNORD10	652966	symbol	H. sapiens	652966	H. sapiens	SNORD10	small nucleolar RNA, C/D box 10	GO:0006396 RNA processing;GO:0016070 RNA metabolic process;GO:0010467 gene expression							0.0	0.0	0.0	0.0	0.0	0.0	0.0	0.0	0.0	0.0	0.0	0.0	0.0	0.0	0.0	0.0	0.0	0.0	0.0	0.0
MIR663AHG	284801	symbol	H. sapiens	284801	H. sapiens	MIR663AHG	MIR663A host gene								0.0	0.0	0.0	0.0	0.0	0.0	0.0	0.0	0.0	0.0	0.0	0.0	0.0	0.0	0.0	0.0	0.0	0.0	0.0	0.0
WNT5A	7474	symbol	H. sapiens	7474	H. sapiens	WNT5A	Wnt family member 5A	GO:0036517 chemoattraction of serotonergic neuron axon;GO:0061341 non-canonical Wnt signaling pathway involved in heart development;GO:0061346 planar cell polarity pathway involved in heart morphogenesis		Human disease related genes:Congenital malformations:Other congenital malformations; Predicted secreted proteins; Disease related genes			(M77)PID WNT SIGNALING PATHWAY; (M23)PID WNT NONCANONICAL PATHWAY; (M254)PID MYC REPRESS PATHWAY	(M5903)HALLMARK NOTCH SIGNALING; (M5930)HALLMARK EPITHELIAL MESENCHYMAL TRANSITION	1.0	0.0	0.0	0.0	0.0	0.0	1.0	0.0	1.0	1.0	1.0	0.0	1.0	1.0	1.0	1.0	0.0	1.0	0.0	0.0
RTL1	388015	symbol	H. sapiens	388015	H. sapiens	RTL1	retrotransposon Gag like 1				Cytosol (Approved)				0.0	0.0	0.0	0.0	0.0	0.0	0.0	0.0	0.0	0.0	0.0	0.0	0.0	0.0	0.0	0.0	0.0	0.0	0.0	0.0
HIST1H3A	8350	gene_synonym	H. sapiens	8350	H. sapiens	H3C1	H3 clustered histone 1	GO:0006335 DNA replication-dependent chromatin assembly;GO:0034723 DNA replication-dependent chromatin organization;GO:0032200 telomere organization		Predicted intracellular proteins; Disease related genes					1.0	0.0	1.0	0.0	0.0	0.0	0.0	0.0	0.0	0.0	0.0	0.0	0.0	0.0	0.0	0.0	0.0	0.0	0.0	0.0
HIST1H1C	3006	gene_synonym	H. sapiens	3006	H. sapiens	H1-2	H1.2 linker histone, cluster member	GO:0098532 histone H3-K27 trimethylation;GO:0070734 histone H3-K27 methylation;GO:0016584 nucleosome positioning		Predicted intracellular proteins	Nucleoli rim;Nucleoplasm (Supported)			(M5939)HALLMARK P53 PATHWAY	1.0	0.0	0.0	0.0	1.0	0.0	0.0	0.0	0.0	0.0	0.0	0.0	0.0	0.0	0.0	0.0	0.0	0.0	0.0	0.0
HIST1H2BN	8341	gene_synonym	H. sapiens	8341	H. sapiens	H2BC15	H2B clustered histone 15	GO:0006334 nucleosome assembly;GO:0031497 chromatin assembly;GO:0034728 nucleosome organization		Predicted intracellular proteins	Nucleoplasm (Approved); Additional: Cytosol				1.0	1.0	0.0	1.0	0.0	0.0	0.0	0.0	0.0	0.0	0.0	0.0	0.0	0.0	0.0	0.0	0.0	0.0	0.0	0.0
SNORA70	26778	symbol	H. sapiens	26778	H. sapiens	SNORA70	small nucleolar RNA, H/ACA box 70	GO:0006396 RNA processing;GO:0016070 RNA metabolic process;GO:0010467 gene expression							0.0	0.0	0.0	0.0	0.0	0.0	0.0	0.0	0.0	0.0	0.0	0.0	0.0	0.0	0.0	0.0	0.0	0.0	0.0	0.0
KCNK3	3777	symbol	H. sapiens	3777	H. sapiens	KCNK3	potassium two pore domain channel subfamily K member 3	GO:0051481 negative regulation of cytosolic calcium ion concentration;GO:0030322 stabilization of membrane potential;GO:0071294 cellular response to zinc ion		FDA approved drug targets:Small molecule drugs; Voltage-gated ion channels:Two-P Potassium Channels; Disease related genes; Transporters:Transporter channels and pores; Human disease related genes:Cardiovascular diseases:Hypertensive diseases		Doxapram; Halothane			0.0	0.0	0.0	0.0	0.0	0.0	1.0	0.0	1.0	0.0	0.0	1.0	1.0	0.0	0.0	1.0	0.0	0.0	0.0	0.0
HIST4H4	121504	gene_synonym	H. sapiens	121504	H. sapiens	H4-16	H4 histone 16	GO:0045653 negative regulation of megakaryocyte differentiation;GO:0006335 DNA replication-dependent chromatin assembly;GO:0034723 DNA replication-dependent chromatin organization		Predicted intracellular proteins; Disease related genes	Nucleoplasm (Supported)				1.0	0.0	0.0	0.0	0.0	0.0	0.0	0.0	0.0	0.0	0.0	0.0	0.0	0.0	0.0	0.0	0.0	0.0	0.0	0.0
HIST1H3F	8968	gene_synonym	H. sapiens	8968	H. sapiens	H3C7	H3 clustered histone 7	GO:0006335 DNA replication-dependent chromatin assembly;GO:0034723 DNA replication-dependent chromatin organization;GO:0032200 telomere organization		Predicted intracellular proteins; Disease related genes					1.0	0.0	1.0	0.0	0.0	0.0	0.0	0.0	0.0	0.0	0.0	0.0	0.0	0.0	0.0	0.0	0.0	0.0	0.0	0.0
TERC	7012	symbol	H. sapiens	7012	H. sapiens	TERC	telomerase RNA component	GO:2000773 negative regulation of cellular senescence;GO:0007004 telomere maintenance via telomerase;GO:0090344 negative regulation of cell aging							1.0	0.0	0.0	0.0	0.0	0.0	0.0	0.0	1.0	0.0	0.0	0.0	1.0	0.0	0.0	0.0	0.0	0.0	0.0	0.0
NME2	4831	symbol	H. sapiens	4831	H. sapiens	NME2	NME/NM23 nucleoside diphosphate kinase 2	GO:0018106 peptidyl-histidine phosphorylation;GO:0006228 UTP biosynthetic process;GO:0006183 GTP biosynthetic process		Enzymes; Predicted intracellular proteins; ENZYME proteins:Transferases; Cancer-related genes:Candidate cancer biomarkers	Cytosol (Supported); Additional: Midbody ring;Plasma membrane		(M66)PID MYC ACTIV PATHWAY		1.0	0.0	0.0	0.0	0.0	0.0	0.0	0.0	0.0	0.0	0.0	0.0	0.0	0.0	0.0	0.0	0.0	0.0	0.0	0.0
LRRTM2	26045	symbol	H. sapiens	26045	H. sapiens	LRRTM2	leucine rich repeat transmembrane neuronal 2	GO:0099151 regulation of postsynaptic density assembly;GO:0099150 regulation of postsynaptic specialization assembly;GO:1904889 regulation of excitatory synapse assembly		Predicted intracellular proteins					0.0	0.0	0.0	0.0	0.0	0.0	0.0	0.0	0.0	0.0	0.0	1.0	0.0	0.0	0.0	0.0	0.0	1.0	0.0	0.0
ZFHX3	463	symbol	H. sapiens	463	H. sapiens	ZFHX3	zinc finger homeobox 3	GO:1904059 regulation of locomotor rhythm;GO:0050795 regulation of behavior;GO:0032922 circadian regulation of gene expression		Transcription factors:Helix-turn-helix domains; Predicted intracellular proteins; Cancer-related genes:Mutational cancer driver genes; Cancer-related genes:Mutated cancer genes	Nucleoplasm (Supported)		(M195)PID CMYB PATHWAY		0.0	0.0	0.0	0.0	0.0	0.0	0.0	0.0	1.0	0.0	0.0	0.0	0.0	0.0	0.0	1.0	0.0	0.0	0.0	0.0
GSR	2936	symbol	H. sapiens	2936	H. sapiens	GSR	glutathione-disulfide reductase	GO:0045454 cell redox homeostasis;GO:0006749 glutathione metabolic process;GO:0098869 cellular oxidant detoxification		FDA approved drug targets:Small molecule drugs; ENZYME proteins:Oxidoreductases; Cancer-related genes:Candidate cancer biomarkers; Disease related genes; Enzymes; Predicted intracellular proteins	Cytosol (Supported)	Glutathione; NADH; Carmustine; 3,6-dihydroxy-xanthene-9-propionic acid; 3-sulfino-L-alanine; Glutathionylspermidine disulfide; 3-(Prop-2-Ene-1-Sulfinyl)-Propene-1-Thiol; Flavin adenine dinucleotide; Glutathione disulfide; 3-nitro-L-tyrosine; 2-(2-PHENYL-3-PYRIDIN-2-YL-4,5,6,7-TETRAHYDRO-2H-ISOPHOSPHINDOL-1-YL)PYRIDINE; 6-(3-METHYL-1,4-DIOXO-1,4-DIHYDRONAPHTHALEN-2-YL)HEXANOIC ACID; Cannabidiol; C…		(M5938)HALLMARK REACTIVE OXYGEN SPECIES PATHWAY; (M5908)HALLMARK ANDROGEN RESPONSE; (M5902)HALLMARK APOPTOSIS	1.0	0.0	0.0	0.0	0.0	1.0	0.0	1.0	0.0	0.0	0.0	0.0	0.0	0.0	0.0	0.0	1.0	0.0	0.0	0.0
ACTG2	72	symbol	H. sapiens	72	H. sapiens	ACTG2	actin gamma 2, smooth muscle	GO:0090131 mesenchyme migration;GO:0072132 mesenchyme morphogenesis;GO:0090130 tissue migration		Human disease related genes:Congenital malformations:Congenital malformations of the digestive system; Predicted intracellular proteins; Disease related genes			(M16801)SIG REGULATION OF THE ACTIN CYTOSKELETON BY RHO GTPASES	(M5915)HALLMARK APICAL JUNCTION	0.0	0.0	0.0	0.0	0.0	0.0	0.0	1.0	0.0	0.0	0.0	0.0	1.0	0.0	0.0	0.0	0.0	0.0	0.0	0.0
HIST1H2BE	3017	gene_synonym	H. sapiens	3017	H. sapiens	H2BC5	H2B clustered histone 5	GO:0006334 nucleosome assembly;GO:0031497 chromatin assembly;GO:0034728 nucleosome organization		Predicted intracellular proteins	Nucleoplasm (Approved); Additional: Cytosol				1.0	1.0	0.0	1.0	0.0	0.0	0.0	0.0	0.0	0.0	0.0	0.0	0.0	0.0	0.0	0.0	0.0	0.0	0.0	0.0
SNORA71A	26777	symbol	H. sapiens	26777	H. sapiens	SNORA71A	small nucleolar RNA, H/ACA box 71A	GO:0006396 RNA processing;GO:0016070 RNA metabolic process;GO:0010467 gene expression							0.0	0.0	0.0	0.0	0.0	0.0	0.0	0.0	0.0	0.0	0.0	0.0	0.0	0.0	0.0	0.0	0.0	0.0	0.0	0.0
DCC	1630	symbol	H. sapiens	1630	H. sapiens	DCC	DCC netrin 1 receptor	GO:0033563 dorsal/ventral axon guidance;GO:0021965 spinal cord ventral commissure morphogenesis;GO:2000171 negative regulation of dendrite development		Human disease related genes:Cancers:Cancers of the digestive system; Human disease related genes:Nervous system diseases:Other nervous and sensory system diseases; Cancer-related genes:Candidate cancer biomarkers; Disease related genes; Predicted intracellular proteins	Golgi apparatus (Approved)		(M108)PID NETRIN PATHWAY	(M5951)HALLMARK SPERMATOGENESIS; (M5956)HALLMARK KRAS SIGNALING DN	1.0	0.0	0.0	0.0	0.0	0.0	0.0	0.0	1.0	0.0	0.0	0.0	0.0	0.0	1.0	0.0	0.0	0.0	0.0	0.0
RPL41	6171	symbol	H. sapiens	6171	H. sapiens	RPL41	ribosomal protein L41	GO:0002181 cytoplasmic translation;GO:0006412 translation;GO:0043043 peptide biosynthetic process		Ribosomal proteins; Predicted intracellular proteins	Endoplasmic reticulum (Supported)				1.0	0.0	0.0	0.0	0.0	0.0	0.0	1.0	0.0	0.0	0.0	0.0	0.0	0.0	0.0	0.0	0.0	0.0	0.0	0.0
SNX27	81609	symbol	H. sapiens	81609	H. sapiens	SNX27	sorting nexin 27	GO:0001770 establishment of natural killer cell polarity;GO:0001767 establishment of lymphocyte polarity;GO:0008333 endosome to lysosome transport		Transporters; Predicted intracellular proteins	Vesicles (Approved)				0.0	0.0	0.0	0.0	0.0	0.0	0.0	0.0	0.0	0.0	0.0	0.0	0.0	0.0	0.0	0.0	0.0	0.0	0.0	0.0
HIST1H2AJ	8331	gene_synonym	H. sapiens	8331	H. sapiens	H2AC14	H2A clustered histone 14			Predicted intracellular proteins	Nucleoplasm (Approved)				1.0	1.0	0.0	0.0	0.0	0.0	0.0	0.0	0.0	0.0	0.0	0.0	0.0	0.0	0.0	0.0	0.0	0.0	0.0	0.0
HIST1H2AL	8332	gene_synonym	H. sapiens	8332	H. sapiens	H2AC16	H2A clustered histone 16	GO:0008150 biological_process		Predicted intracellular proteins	Nucleoplasm (Approved)				1.0	1.0	0.0	0.0	0.0	0.0	0.0	0.0	0.0	0.0	0.0	0.0	0.0	0.0	0.0	0.0	0.0	0.0	0.0	0.0
HIST1H4B	8366	gene_synonym	H. sapiens	8366	H. sapiens	H4C2	H4 clustered histone 2	GO:0045653 negative regulation of megakaryocyte differentiation;GO:0006335 DNA replication-dependent chromatin assembly;GO:0034723 DNA replication-dependent chromatin organization		Predicted intracellular proteins; Disease related genes					1.0	0.0	0.0	0.0	0.0	0.0	0.0	0.0	0.0	0.0	0.0	0.0	0.0	0.0	0.0	0.0	0.0	0.0	0.0	0.0
FZD2	2535	symbol	H. sapiens	2535	H. sapiens	FZD2	frizzled class receptor 2	GO:0003150 muscular septum morphogenesis;GO:0003149 membranous septum morphogenesis;GO:0060022 hard palate development		Cancer-related genes:Candidate cancer biomarkers; Human disease related genes:Congenital malformations:Congenital malformations of the musculoskeletal system; G-protein coupled receptors:Family fz/smo receptors; Disease related genes; G-protein coupled receptors:GPCRs excl olfactory receptors; Potential drug targets	Nuclear bodies;Nucleoplasm (Approved); Additional: Cell Junctions		(M77)PID WNT SIGNALING PATHWAY; (M23)PID WNT NONCANONICAL PATHWAY; (M5493)WNT SIGNALING	(M5942)HALLMARK UV RESPONSE DN	1.0	0.0	0.0	0.0	0.0	0.0	1.0	0.0	1.0	1.0	1.0	0.0	0.0	0.0	0.0	0.0	0.0	0.0	0.0	0.0
HIST1H2BF	3017	gene_synonym	H. sapiens	3017	H. sapiens	H2BC5	H2B clustered histone 5	GO:0006334 nucleosome assembly;GO:0031497 chromatin assembly;GO:0034728 nucleosome organization		Predicted intracellular proteins	Nucleoplasm (Approved); Additional: Cytosol				1.0	1.0	0.0	1.0	0.0	0.0	0.0	0.0	0.0	0.0	0.0	0.0	0.0	0.0	0.0	0.0	0.0	0.0	0.0	0.0
PAM16	51025	symbol	H. sapiens	51025	H. sapiens	PAM16	presequence translocase associated motor 16	GO:0030150 protein import into mitochondrial matrix;GO:0032780 negative regulation of ATP-dependent activity;GO:0044743 protein transmembrane import into intracellular organelle		Human disease related genes:Congenital malformations:Congenital malformations of the musculoskeletal system; Predicted intracellular proteins; Disease related genes	Mitochondria;Nucleoplasm (Approved); Additional: Microtubules				0.0	0.0	0.0	0.0	0.0	0.0	0.0	0.0	0.0	1.0	0.0	0.0	0.0	0.0	0.0	0.0	0.0	0.0	1.0	0.0
TRIM16	10626	symbol	H. sapiens	10626	H. sapiens	TRIM16	tripartite motif containing 16	GO:0048386 positive regulation of retinoic acid receptor signaling pathway;GO:0048385 regulation of retinoic acid receptor signaling pathway;GO:0045618 positive regulation of keratinocyte differentiation		Enzymes; Predicted intracellular proteins; ENZYME proteins:Transferases	Cytosol (Supported); Additional: Plasma membrane				0.0	0.0	0.0	0.0	1.0	0.0	0.0	0.0	0.0	0.0	0.0	0.0	0.0	0.0	0.0	0.0	0.0	0.0	0.0	0.0
FOS	2353	symbol	H. sapiens	2353	H. sapiens	FOS	Fos proto-oncogene, AP-1 transcription factor subunit	GO:0001661 conditioned taste aversion;GO:0009629 response to gravity;GO:0030431 sleep		Transcription factors:Basic domains; Predicted intracellular proteins; Cancer-related genes:Candidate cancer biomarkers	Nucleoplasm (Supported)	Nadroparin	(M134)PID TCR RAS PATHWAY; (M206)PID PDGFRA PATHWAY; (M268)PID S1P S1P2 PATHWAY	(M5941)HALLMARK UV RESPONSE UP; (M5890)HALLMARK TNFA SIGNALING VIA NFKB; (M5891)HALLMARK HYPOXIA	1.0	0.0	1.0	0.0	0.0	1.0	0.0	1.0	1.0	0.0	0.0	0.0	0.0	0.0	1.0	0.0	0.0	0.0	0.0	0.0
ALX4	60529	symbol	H. sapiens	60529	H. sapiens	ALX4	ALX homeobox 4	GO:0035116 embryonic hindlimb morphogenesis;GO:0035115 embryonic forelimb morphogenesis;GO:0035137 hindlimb morphogenesis		Transcription factors:Helix-turn-helix domains; Human disease related genes:Congenital malformations:Congenital malformations of the musculoskeletal system; Human disease related genes:Congenital malformations:Other congenital malformations; Disease related genes; Predicted intracellular proteins	Nucleoplasm (Supported)				0.0	0.0	0.0	0.0	0.0	0.0	1.0	0.0	0.0	0.0	0.0	0.0	0.0	1.0	0.0	0.0	0.0	0.0	0.0	0.0
SCARNA10	692148	symbol	H. sapiens	692148	H. sapiens	SCARNA10	small Cajal body-specific RNA 10	GO:0006396 RNA processing;GO:0016070 RNA metabolic process;GO:0010467 gene expression							0.0	0.0	0.0	0.0	0.0	0.0	0.0	0.0	0.0	0.0	0.0	0.0	0.0	0.0	0.0	0.0	0.0	0.0	0.0	0.0
BMP8B	656	symbol	H. sapiens	656	H. sapiens	BMP8B	bone morphogenetic protein 8b	GO:0010862 positive regulation of pathway-restricted SMAD protein phosphorylation;GO:0060395 SMAD protein signal transduction;GO:0060393 regulation of pathway-restricted SMAD protein phosphorylation		Predicted secreted proteins	Vesicles (Approved)		(M5883)NABA SECRETED FACTORS; (M5885)NABA MATRISOME ASSOCIATED; (M5889)NABA MATRISOME		0.0	0.0	0.0	0.0	0.0	1.0	0.0	0.0	0.0	1.0	0.0	0.0	0.0	0.0	0.0	0.0	0.0	0.0	0.0	0.0
SNORA24	677809	symbol	H. sapiens	677809	H. sapiens	SNORA24	small nucleolar RNA, H/ACA box 24	GO:0006396 RNA processing;GO:0016070 RNA metabolic process;GO:0010467 gene expression							0.0	0.0	0.0	0.0	0.0	0.0	0.0	0.0	0.0	0.0	0.0	0.0	0.0	0.0	0.0	0.0	0.0	0.0	0.0	0.0
METTL24	728464	symbol	H. sapiens	728464	H. sapiens	METTL24	methyltransferase like 24	GO:0032259 methylation;GO:0008152 metabolic process;GO:0008150 biological_process		Predicted secreted proteins					0.0	0.0	0.0	0.0	0.0	0.0	0.0	0.0	0.0	0.0	0.0	0.0	0.0	0.0	0.0	0.0	0.0	0.0	0.0	0.0
FZD9	8326	symbol	H. sapiens	8326	H. sapiens	FZD9	frizzled class receptor 9	GO:1903910 negative regulation of receptor clustering;GO:1904394 negative regulation of skeletal muscle acetylcholine-gated channel clustering;GO:1990523 bone regeneration		G-protein coupled receptors:GPCRs excl olfactory receptors; Human disease related genes:Other congenital disorders:Chromosomal abnormalities; CD markers; G-protein coupled receptors:Family fz/smo receptors			(M77)PID WNT SIGNALING PATHWAY		0.0	0.0	0.0	0.0	0.0	0.0	0.0	0.0	1.0	1.0	0.0	0.0	0.0	0.0	1.0	0.0	0.0	0.0	1.0	0.0
HIST3H2A	92815	gene_synonym	H. sapiens	92815	H. sapiens	H2AW	H2A.W histone	GO:0070914 UV-damage excision repair;GO:0006337 nucleosome disassembly;GO:0031498 chromatin disassembly		Predicted intracellular proteins	Nucleoplasm (Approved)			(M5939)HALLMARK P53 PATHWAY	1.0	1.0	0.0	0.0	0.0	0.0	0.0	0.0	0.0	0.0	0.0	0.0	0.0	0.0	0.0	0.0	0.0	0.0	0.0	0.0
MAP3K5	4217	symbol	H. sapiens	4217	H. sapiens	MAP3K5	mitogen-activated protein kinase kinase kinase 5	GO:0072577 endothelial cell apoptotic process;GO:0038066 p38MAPK cascade;GO:0010663 positive regulation of striated muscle cell apoptotic process	STE Ser/Thr protein kinase family	Enzymes; Kinases:STE Ser/Thr protein kinases; Predicted intracellular proteins; ENZYME proteins:Transferases	Cytosol (Supported)		(M20)PID P38 MKK3 6PATHWAY; (M197)PID HIV NEF PATHWAY; (M249)PID PI3KCI AKT PATHWAY		1.0	0.0	0.0	0.0	0.0	1.0	0.0	0.0	0.0	0.0	0.0	0.0	0.0	0.0	1.0	0.0	0.0	0.0	0.0	1.0
CSNK1E	1454	symbol	H. sapiens	1454	H. sapiens	CSNK1E	casein kinase 1 epsilon	GO:1905424 regulation of Wnt-mediated midbrain dopaminergic neuron differentiation;GO:1905426 positive regulation of Wnt-mediated midbrain dopaminergic neuron differentiation;GO:1904958 positive regulation of midbrain dopaminergic neuron differentiation	CK1 Ser/Thr protein kinase family	Kinases:CK1 Ser/Thr protein kinases; Cancer-related genes:Candidate cancer biomarkers; Enzymes; Predicted intracellular proteins; ENZYME proteins:Transferases	Cytosol;Nucleoplasm (Approved)	Seliciclib	(M95)PID CIRCADIAN PATHWAY; (M31)PID BETA CATENIN DEG PATHWAY; (M219)PID HEDGEHOG GLI PATHWAY	(M5895)HALLMARK WNT BETA CATENIN SIGNALING	1.0	0.0	0.0	0.0	0.0	0.0	0.0	1.0	1.0	1.0	1.0	0.0	0.0	0.0	0.0	0.0	0.0	0.0	0.0	0.0
SNORA8	654320	symbol	H. sapiens	654320	H. sapiens	SNORA8	small nucleolar RNA, H/ACA box 8	GO:0006396 RNA processing;GO:0016070 RNA metabolic process;GO:0010467 gene expression							0.0	0.0	0.0	0.0	0.0	0.0	0.0	0.0	0.0	0.0	0.0	0.0	0.0	0.0	0.0	0.0	0.0	0.0	0.0	0.0
SNORD15B	114599	symbol	H. sapiens	114599	H. sapiens	SNORD15B	small nucleolar RNA, C/D box 15B	GO:0006396 RNA processing;GO:0016070 RNA metabolic process;GO:0010467 gene expression							0.0	0.0	0.0	0.0	0.0	0.0	0.0	0.0	0.0	0.0	0.0	0.0	0.0	0.0	0.0	0.0	0.0	0.0	0.0	0.0
MAP2	4133	symbol	H. sapiens	4133	H. sapiens	MAP2	microtubule associated protein 2	GO:1901951 regulation of anterograde dense core granule transport;GO:1901953 positive regulation of anterograde dense core granule transport;GO:1904809 regulation of dense core granule transport		FDA approved drug targets:Small molecule drugs; Predicted intracellular proteins	Cytosol;Plasma membrane (Approved)	Estramustine; Paclitaxel; Docetaxel	(M87)PID LKB1 PATHWAY		1.0	0.0	0.0	0.0	0.0	0.0	0.0	0.0	0.0	0.0	0.0	0.0	0.0	0.0	0.0	0.0	0.0	0.0	0.0	0.0
POMK	84197	symbol	H. sapiens	84197	H. sapiens	POMK	protein O-mannose kinase	GO:0046835 carbohydrate phosphorylation;GO:0019233 sensory perception of pain;GO:0006493 protein O-linked glycosylation	Other	ENZYME proteins:Transferases; Disease related genes; Potential drug targets; Enzymes; Kinases; Predicted intracellular proteins; Human disease related genes:Congenital disorders of metabolism:Congenital disorders of glycan/glycoprotein metabolism					0.0	0.0	0.0	0.0	0.0	0.0	0.0	0.0	0.0	0.0	0.0	0.0	0.0	0.0	0.0	1.0	0.0	0.0	0.0	0.0
NUDT3	11165	symbol	H. sapiens	11165	H. sapiens	NUDT3	nudix hydrolase 3	GO:0071544 diphosphoinositol polyphosphate catabolic process;GO:0071543 diphosphoinositol polyphosphate metabolic process;GO:1901906 diadenosine pentaphosphate metabolic process		Enzymes; ENZYME proteins:Hydrolases; Predicted intracellular proteins	Cytosol (Approved)				0.0	0.0	0.0	0.0	0.0	0.0	0.0	0.0	0.0	0.0	0.0	0.0	0.0	0.0	0.0	0.0	0.0	0.0	0.0	0.0
FOXE3	2301	symbol	H. sapiens	2301	H. sapiens	FOXE3	forkhead box E3	GO:0002930 trabecular meshwork development;GO:2001109 regulation of lens epithelial cell proliferation;GO:2001111 positive regulation of lens epithelial cell proliferation		Human disease related genes:Cardiovascular diseases:Vascular diseases; Human disease related genes:Congenital malformations:Congenital malformations of eye; Transcription factors:Helix-turn-helix domains; Human disease related genes:Nervous system diseases:Eye disease; Disease related genes; Predicted intracellular proteins					1.0	0.0	0.0	0.0	0.0	0.0	1.0	0.0	0.0	0.0	0.0	0.0	0.0	0.0	0.0	0.0	0.0	0.0	0.0	0.0
PPM1L	151742	symbol	H. sapiens	151742	H. sapiens	PPM1L	protein phosphatase, Mg2+/Mn2+ dependent 1L	GO:0030148 sphingolipid biosynthetic process;GO:0046467 membrane lipid biosynthetic process;GO:0006665 sphingolipid metabolic process		Enzymes; ENZYME proteins:Hydrolases; Predicted intracellular proteins	Cytosol (Approved); Additional: Nucleoplasm				0.0	0.0	0.0	0.0	0.0	0.0	0.0	0.0	0.0	0.0	0.0	0.0	0.0	0.0	0.0	0.0	0.0	0.0	0.0	0.0
SNORA67	26781	symbol	H. sapiens	26781	H. sapiens	SNORA67	small nucleolar RNA, H/ACA box 67	GO:0006396 RNA processing;GO:0016070 RNA metabolic process;GO:0010467 gene expression							0.0	0.0	0.0	0.0	0.0	0.0	0.0	0.0	0.0	0.0	0.0	0.0	0.0	0.0	0.0	0.0	0.0	0.0	0.0	0.0
FENDRR	400550	symbol	H. sapiens	400550	H. sapiens	FENDRR	FOXF1 adjacent non-coding developmental regulatory RNA								0.0	0.0	0.0	0.0	0.0	0.0	0.0	0.0	0.0	0.0	0.0	0.0	0.0	0.0	0.0	0.0	0.0	0.0	0.0	0.0
NUTM2D	728130	symbol	H. sapiens	728130	H. sapiens	NUTM2D	NUT family member 2D			Predicted intracellular proteins; Cancer-related genes	Nuclear bodies (Approved)				0.0	0.0	0.0	0.0	0.0	0.0	0.0	0.0	0.0	0.0	0.0	0.0	0.0	0.0	0.0	0.0	0.0	0.0	0.0	0.0
HIST1H4I	8294	gene_synonym	H. sapiens	8294	H. sapiens	H4C9	H4 clustered histone 9	GO:0045653 negative regulation of megakaryocyte differentiation;GO:0006335 DNA replication-dependent chromatin assembly;GO:0034723 DNA replication-dependent chromatin organization		Predicted intracellular proteins; Cancer-related genes; Disease related genes			(M32)PID HDAC CLASSIII PATHWAY		1.0	0.0	0.0	0.0	0.0	0.0	0.0	0.0	0.0	0.0	0.0	0.0	0.0	0.0	0.0	0.0	0.0	0.0	0.0	0.0
RPS17	6218	symbol	H. sapiens	6218	H. sapiens	RPS17	ribosomal protein S17	GO:0006413 translational initiation;GO:0042274 ribosomal small subunit biogenesis;GO:0034101 erythrocyte homeostasis		Human disease related genes:Other congenital disorders:Ribosomopathies; Human disease related genes:Cardiovascular diseases:Hematologic diseases; Ribosomal proteins; Disease related genes; Predicted intracellular proteins	Cytosol;Endoplasmic reticulum (Approved); Additional: Nucleoli	Artenimol			1.0	0.0	0.0	0.0	0.0	0.0	0.0	1.0	0.0	0.0	0.0	0.0	0.0	0.0	0.0	0.0	0.0	0.0	0.0	0.0
LONRF2	164832	symbol	H. sapiens	164832	H. sapiens	LONRF2	LON peptidase N-terminal domain and ring finger 2			Predicted intracellular proteins	Nucleoplasm (Approved)				0.0	0.0	0.0	0.0	0.0	0.0	0.0	0.0	0.0	0.0	0.0	0.0	0.0	0.0	0.0	0.0	0.0	0.0	0.0	0.0
SLC25A29	123096	symbol	H. sapiens	123096	H. sapiens	SLC25A29	solute carrier family 25 member 29	GO:1990575 mitochondrial L-ornithine transmembrane transport;GO:0006844 acyl carnitine transport;GO:1903826 L-arginine transmembrane transport		Transporters:Electrochemical Potential-driven transporters; Predicted intracellular proteins		Levocarnitine			0.0	0.0	0.0	0.0	0.0	1.0	0.0	0.0	0.0	0.0	0.0	0.0	0.0	0.0	0.0	0.0	0.0	0.0	0.0	0.0
SOCS3	9021	symbol	H. sapiens	9021	H. sapiens	SOCS3	suppressor of cytokine signaling 3	GO:0060670 branching involved in labyrinthine layer morphogenesis;GO:0060707 trophoblast giant cell differentiation;GO:0042532 negative regulation of tyrosine phosphorylation of STAT protein		Predicted intracellular proteins; Disease related genes	Cytosol (Approved); Additional: Plasma membrane		(M233)PID EPO PATHWAY; (M196)PID IL23 PATHWAY; (M183)PID IL6 7 PATHWAY	(M5897)HALLMARK IL6 JAK STAT3 SIGNALING; (M5890)HALLMARK TNFA SIGNALING VIA NFKB; (M5913)HALLMARK INTERFERON GAMMA RESPONSE	1.0	0.0	1.0	0.0	0.0	0.0	0.0	0.0	0.0	0.0	0.0	0.0	0.0	0.0	0.0	0.0	0.0	0.0	0.0	0.0
LINC00273	649159	symbol	H. sapiens	649159	H. sapiens	LINC00273	long intergenic non-protein coding RNA 273								0.0	0.0	0.0	0.0	0.0	0.0	0.0	0.0	0.0	0.0	0.0	0.0	0.0	0.0	0.0	0.0	0.0	0.0	0.0	0.0
EGLN2	112398	symbol	H. sapiens	112398	H. sapiens	EGLN2	egl-9 family hypoxia inducible factor 2	GO:0018401 peptidyl-proline hydroxylation to 4-hydroxy-L-proline;GO:0019511 peptidyl-proline hydroxylation;GO:0030520 intracellular estrogen receptor signaling pathway		Enzymes; Predicted intracellular proteins; ENZYME proteins:Oxidoreductases	Nucleoplasm (Supported)	Ascorbic acid; Roxadustat	(M180)PID HIF1A PATHWAY; (M44)PID HIF2PATHWAY; (M3468)NABA ECM REGULATORS	(M5938)HALLMARK REACTIVE OXYGEN SPECIES PATHWAY	1.0	0.0	0.0	0.0	0.0	0.0	0.0	0.0	1.0	0.0	1.0	0.0	1.0	0.0	1.0	0.0	1.0	0.0	0.0	0.0
ADGRG2	10149	symbol	H. sapiens	10149	H. sapiens	ADGRG2	adhesion G protein-coupled receptor G2	GO:0007189 adenylate cyclase-activating G protein-coupled receptor signaling pathway;GO:0007188 adenylate cyclase-modulating G protein-coupled receptor signaling pathway;GO:0007283 spermatogenesis		Transporters; G-protein coupled receptors:Family 2 (B) receptors; Human disease related genes:Congenital malformations:Congenital malformations of genital organs; Disease related genes; Potential drug targets; G-protein coupled receptors:GPCRs excl olfactory receptors	Cytosol;Plasma membrane (Approved)				0.0	0.0	0.0	0.0	0.0	0.0	0.0	0.0	0.0	0.0	0.0	0.0	0.0	0.0	0.0	0.0	0.0	0.0	0.0	0.0
PDF	64146	symbol	H. sapiens	64146	H. sapiens	PDF	peptide deformylase, mitochondrial	GO:0043686 co-translational protein modification;GO:0018206 peptidyl-methionine modification;GO:0031365 N-terminal protein amino acid modification		Enzymes; ENZYME proteins:Hydrolases; Predicted intracellular proteins	Mitochondria (Approved); Additional: Nucleoplasm	2-[(Formyl-Hydroxy-Amino)-Methyl]-Heptanoic Acid [1-(2-Hydroxymethyl-Pyrrolidine-1-Carbonyl)-2-Methyl-Propyl]-Amide; Bb-3497			0.0	0.0	0.0	0.0	0.0	0.0	0.0	1.0	0.0	0.0	0.0	0.0	0.0	0.0	0.0	0.0	0.0	0.0	0.0	0.0
FAM120C	54954	symbol	H. sapiens	54954	H. sapiens	FAM120C	family with sequence similarity 120C			Predicted intracellular proteins	Nuclear speckles (Approved)				0.0	0.0	0.0	0.0	0.0	0.0	0.0	0.0	0.0	0.0	0.0	0.0	0.0	0.0	0.0	0.0	0.0	0.0	0.0	0.0
RNF152	220441	symbol	H. sapiens	220441	H. sapiens	RNF152	ring finger protein 152	GO:1904262 negative regulation of TORC1 signaling;GO:1903432 regulation of TORC1 signaling;GO:0070534 protein K63-linked ubiquitination		Enzymes; Predicted intracellular proteins; ENZYME proteins:Transferases					0.0	0.0	0.0	1.0	0.0	0.0	0.0	0.0	0.0	0.0	1.0	0.0	0.0	0.0	0.0	0.0	0.0	0.0	0.0	0.0
C18orf32	497661	symbol	H. sapiens	497661	H. sapiens	C18orf32	chromosome 18 open reading frame 32	GO:0043123 positive regulation of I-kappaB kinase/NF-kappaB signaling;GO:0043122 regulation of I-kappaB kinase/NF-kappaB signaling;GO:1902533 positive regulation of intracellular signal transduction			Vesicles (Approved); Additional: Nucleoplasm				0.0	0.0	0.0	0.0	0.0	0.0	0.0	0.0	0.0	0.0	0.0	0.0	0.0	0.0	0.0	0.0	0.0	0.0	0.0	0.0
9-Sep						None	None	None	None	None	None	None	None	None	nan	nan	nan	nan	nan	nan	nan	nan	nan	nan	nan	nan	nan	nan	nan	nan	nan	nan	nan	nan
COX20	116228	symbol	H. sapiens	116228	H. sapiens	COX20	cytochrome c oxidase assembly factor COX20	GO:0033617 mitochondrial cytochrome c oxidase assembly;GO:0008535 respiratory chain complex IV assembly;GO:0017004 cytochrome complex assembly		Disease related genes; Human disease related genes:Congenital disorders of metabolism:Mitochondrial diseases	Mitochondria (Enhanced)				1.0	0.0	0.0	0.0	0.0	1.0	0.0	0.0	0.0	0.0	0.0	0.0	0.0	0.0	0.0	0.0	0.0	0.0	1.0	0.0
AGRN	375790	symbol	H. sapiens	375790	H. sapiens	AGRN	agrin	GO:0045887 positive regulation of synaptic assembly at neuromuscular junction;GO:1904398 positive regulation of neuromuscular junction development;GO:0008582 regulation of synaptic assembly at neuromuscular junction		Human disease related genes:Nervous system diseases:Other nervous and sensory system diseases; Transporters:Accessory Factors Involved in Transport; Predicted secreted proteins; Disease related genes; Potential drug targets; Predicted intracellular proteins	Cytosol (Approved); Additional: Plasma membrane		(M5887)NABA BASEMENT MEMBRANES; (M3008)NABA ECM GLYCOPROTEINS; (M5884)NABA CORE MATRISOME	(M5909)HALLMARK MYOGENESIS; (M5937)HALLMARK GLYCOLYSIS	0.0	0.0	0.0	0.0	0.0	0.0	0.0	0.0	0.0	0.0	0.0	0.0	0.0	0.0	0.0	0.0	0.0	1.0	0.0	0.0
SOX11	6664	symbol	H. sapiens	6664	H. sapiens	SOX11	SRY-box transcription factor 11	GO:2001109 regulation of lens epithelial cell proliferation;GO:2001111 positive regulation of lens epithelial cell proliferation;GO:0061386 closure of optic fissure		Human disease related genes:Other diseases:Mental and behavioural disorders; Human disease related genes:Congenital malformations:Other congenital malformations; Disease related genes; Transcription factors:Other all-alpha-helical DNA-binding domains; Predicted intracellular proteins	Nucleoplasm (Supported); Additional: Plasma membrane				1.0	0.0	0.0	0.0	0.0	0.0	1.0	0.0	1.0	0.0	0.0	0.0	1.0	1.0	0.0	0.0	0.0	0.0	0.0	0.0
SNORA23	677808	symbol	H. sapiens	677808	H. sapiens	SNORA23	small nucleolar RNA, H/ACA box 23	GO:0006396 RNA processing;GO:0016070 RNA metabolic process;GO:0010467 gene expression							0.0	0.0	0.0	0.0	0.0	0.0	0.0	0.0	0.0	0.0	0.0	0.0	0.0	0.0	0.0	0.0	0.0	0.0	0.0	0.0
GRIA1	2890	symbol	H. sapiens	2890	H. sapiens	GRIA1	glutamate ionotropic receptor AMPA type subunit 1	GO:0071242 cellular response to ammonium ion;GO:0060359 response to ammonium ion;GO:0099566 regulation of postsynaptic cytosolic calcium ion concentration		Transporters:Transporter channels and pores; FDA approved drug targets:Small molecule drugs		Glutamic acid; Butabarbital; Lamotrigine; Isoflurane; Ethanol; Methoxyflurane; Desflurane; Sevoflurane; Talampanel; CX717; CX516; Perampanel; Tianeptine; Fluciclovine (18F)	(M62)PID EPHB FWD PATHWAY		0.0	0.0	0.0	0.0	0.0	0.0	0.0	0.0	1.0	0.0	0.0	1.0	0.0	0.0	0.0	0.0	0.0	0.0	0.0	1.0
HIST1H2AB	8335	gene_synonym	H. sapiens	8335	H. sapiens	H2AC4	H2A clustered histone 4	GO:0008285 negative regulation of cell population proliferation;GO:0042127 regulation of cell population proliferation;GO:0048523 negative regulation of cellular process		Predicted intracellular proteins	Nucleoplasm (Approved)				1.0	1.0	0.0	0.0	0.0	0.0	0.0	0.0	0.0	0.0	0.0	0.0	0.0	0.0	0.0	0.0	0.0	0.0	0.0	0.0
IRS1	3667	symbol	H. sapiens	3667	H. sapiens	IRS1	insulin receptor substrate 1	GO:0032000 positive regulation of fatty acid beta-oxidation;GO:0048009 insulin-like growth factor receptor signaling pathway;GO:0045725 positive regulation of glycogen biosynthetic process		Predicted intracellular proteins; Disease related genes	Cytosol;Nucleoplasm (Supported); Additional: Plasma membrane	[4-({5-(AMINOCARBONYL)-4-[(3-METHYLPHENYL)AMINO]PYRIMIDIN-2-YL}AMINO)PHENYL]ACETIC ACID	(M268)PID S1P S1P2 PATHWAY; (M1718)SIG IL4RECEPTOR IN B LYPHOCYTES; (M125)PID IGF1 PATHWAY	(M5942)HALLMARK UV RESPONSE DN; (M5915)HALLMARK APICAL JUNCTION	0.0	0.0	1.0	0.0	0.0	0.0	0.0	0.0	0.0	0.0	1.0	0.0	1.0	0.0	0.0	0.0	0.0	0.0	0.0	0.0
NBL1	4681	symbol	H. sapiens	4681	H. sapiens	NBL1	NBL1, DAN family BMP antagonist	GO:0038098 sequestering of BMP from receptor via BMP binding;GO:0035582 sequestering of BMP in extracellular matrix;GO:0048263 determination of dorsal identity		Predicted secreted proteins; Predicted intracellular proteins				(M5906)HALLMARK ESTROGEN RESPONSE EARLY; (M5907)HALLMARK ESTROGEN RESPONSE LATE	0.0	0.0	0.0	0.0	0.0	0.0	0.0	0.0	0.0	0.0	0.0	0.0	0.0	1.0	0.0	0.0	0.0	0.0	0.0	0.0
UBASH3B	84959	symbol	H. sapiens	84959	H. sapiens	UBASH3B	ubiquitin associated and SH3 domain containing B	GO:0090331 negative regulation of platelet aggregation;GO:0038063 collagen-activated tyrosine kinase receptor signaling pathway;GO:0034111 negative regulation of homotypic cell-cell adhesion		Enzymes; ENZYME proteins:Hydrolases; Predicted intracellular proteins	Cytosol (Approved); Additional: Nuclear bodies;Nucleoplasm				1.0	0.0	0.0	0.0	0.0	0.0	0.0	0.0	0.0	0.0	0.0	0.0	0.0	0.0	0.0	0.0	0.0	0.0	0.0	0.0
DCAKD	79877	symbol	H. sapiens	79877	H. sapiens	DCAKD	dephospho-CoA kinase domain containing	GO:0015937 coenzyme A biosynthetic process;GO:0015936 coenzyme A metabolic process;GO:0033866 nucleoside bisphosphate biosynthetic process		Predicted intracellular proteins	Nucleoplasm (Approved)				1.0	0.0	0.0	0.0	0.0	0.0	0.0	0.0	0.0	0.0	0.0	0.0	0.0	0.0	0.0	0.0	0.0	0.0	0.0	0.0
GCSH	2653	symbol	H. sapiens	2653	H. sapiens	GCSH	glycine cleavage system protein H	GO:0006546 glycine catabolic process;GO:0019464 glycine decarboxylation via glycine cleavage system;GO:0009249 protein lipoylation		Human disease related genes:Congenital disorders of metabolism:Congenital disorders of amino acid metabolism; Predicted intracellular proteins; Disease related genes	Vesicles (Approved)	6-(Hydroxyethyldithio)-8-(Aminomethylthio)Octanoic Acid; Dihydrolipoic Acid			0.0	0.0	0.0	0.0	1.0	0.0	0.0	1.0	0.0	0.0	0.0	0.0	0.0	0.0	0.0	0.0	0.0	0.0	0.0	0.0
MOB4	25843	symbol	H. sapiens	25843	H. sapiens	MOB4	MOB family member 4, phocein			Predicted intracellular proteins					0.0	0.0	0.0	0.0	0.0	0.0	0.0	0.0	0.0	0.0	0.0	0.0	0.0	0.0	0.0	0.0	0.0	0.0	0.0	0.0
ZNF771	51333	symbol	H. sapiens	51333	H. sapiens	ZNF771	zinc finger protein 771	GO:0006357 regulation of transcription by RNA polymerase II;GO:0006355 regulation of transcription, DNA-templated;GO:1903506 regulation of nucleic acid-templated transcription		Predicted intracellular proteins; Transcription factors:Zinc-coordinating DNA-binding domains	Nucleoli;Nucleoplasm (Enhanced)				0.0	0.0	0.0	0.0	0.0	0.0	0.0	0.0	0.0	0.0	0.0	0.0	0.0	0.0	0.0	0.0	0.0	0.0	0.0	0.0
TULP4	56995	symbol	H. sapiens	56995	H. sapiens	TULP4	TUB like protein 4	GO:0016567 protein ubiquitination;GO:0032446 protein modification by small protein conjugation;GO:0070647 protein modification by small protein conjugation or removal		Predicted intracellular proteins					0.0	0.0	0.0	0.0	0.0	0.0	0.0	0.0	0.0	0.0	0.0	0.0	0.0	0.0	0.0	0.0	0.0	0.0	0.0	0.0
FLRT1	23769	symbol	H. sapiens	23769	H. sapiens	FLRT1	fibronectin leucine rich transmembrane protein 1	GO:0008543 fibroblast growth factor receptor signaling pathway;GO:1990138 neuron projection extension;GO:0044344 cellular response to fibroblast growth factor stimulus							0.0	0.0	0.0	0.0	0.0	0.0	0.0	0.0	0.0	0.0	0.0	0.0	0.0	0.0	0.0	0.0	0.0	0.0	0.0	0.0
MFHAS1	9258	symbol	H. sapiens	9258	H. sapiens	MFHAS1	multifunctional ROCO family signaling regulator 1	GO:0034137 positive regulation of toll-like receptor 2 signaling pathway;GO:0034136 negative regulation of toll-like receptor 2 signaling pathway;GO:0034135 regulation of toll-like receptor 2 signaling pathway		Predicted intracellular proteins; Disease related genes	Nucleoplasm (Approved); Additional: Cytosol			(M5945)HALLMARK HEME METABOLISM	0.0	0.0	0.0	0.0	0.0	0.0	0.0	0.0	0.0	0.0	0.0	0.0	0.0	0.0	0.0	0.0	0.0	0.0	0.0	0.0
SUSD5	26032	symbol	H. sapiens	26032	H. sapiens	SUSD5	sushi domain containing 5	GO:0007219 Notch signaling pathway;GO:0007155 cell adhesion;GO:0022610 biological adhesion		Predicted intracellular proteins	Golgi apparatus;Vesicles (Uncertain)				0.0	0.0	0.0	0.0	0.0	0.0	0.0	0.0	0.0	0.0	0.0	0.0	0.0	0.0	0.0	0.0	0.0	0.0	0.0	0.0
GCAT	23464	symbol	H. sapiens	23464	H. sapiens	GCAT	glycine C-acetyltransferase	GO:0019518 L-threonine catabolic process to glycine;GO:0006567 threonine catabolic process;GO:0006566 threonine metabolic process		Enzymes; Predicted intracellular proteins; ENZYME proteins:Transferases	Nucleoplasm (Supported); Additional: Mitochondria;Nuclear speckles	Pyridoxal phosphate; Glycine			0.0	0.0	0.0	0.0	0.0	0.0	0.0	1.0	0.0	0.0	0.0	0.0	0.0	0.0	0.0	0.0	0.0	0.0	0.0	0.0
HIST1H3I	8354	gene_synonym	H. sapiens	8354	H. sapiens	H3C11	H3 clustered histone 11	GO:0006335 DNA replication-dependent chromatin assembly;GO:0034723 DNA replication-dependent chromatin organization;GO:0032200 telomere organization		Predicted intracellular proteins; Disease related genes					1.0	0.0	1.0	0.0	0.0	0.0	0.0	0.0	0.0	0.0	0.0	0.0	0.0	0.0	0.0	0.0	0.0	0.0	0.0	0.0
RNF169	254225	symbol	H. sapiens	254225	H. sapiens	RNF169	ring finger protein 169	GO:2000780 negative regulation of double-strand break repair;GO:0045738 negative regulation of DNA repair;GO:2001021 negative regulation of response to DNA damage stimulus		Enzymes; Predicted intracellular proteins; ENZYME proteins:Transferases	Nuclear bodies;Nucleoplasm (Enhanced); Additional: Cytosol;Nucleoli;Nucleoli rim				0.0	0.0	0.0	0.0	1.0	0.0	0.0	0.0	0.0	0.0	0.0	0.0	0.0	0.0	0.0	0.0	0.0	0.0	0.0	0.0
FAM46B	115572	gene_synonym	H. sapiens	115572	H. sapiens	TENT5B	terminal nucleotidyltransferase 5B	GO:0048255 mRNA stabilization;GO:0043489 RNA stabilization;GO:1902373 negative regulation of mRNA catabolic process		Predicted intracellular proteins					0.0	0.0	0.0	0.0	0.0	0.0	0.0	0.0	0.0	0.0	1.0	0.0	0.0	0.0	0.0	0.0	0.0	0.0	0.0	0.0
SNORD97	692223	symbol	H. sapiens	692223	H. sapiens	SNORD97	small nucleolar RNA, C/D box 97	GO:0006396 RNA processing;GO:0016070 RNA metabolic process;GO:0010467 gene expression							0.0	0.0	0.0	0.0	0.0	0.0	0.0	0.0	0.0	0.0	0.0	0.0	0.0	0.0	0.0	0.0	0.0	0.0	0.0	0.0
SNHG16	100507246	symbol	H. sapiens	100507246	H. sapiens	SNHG16	small nucleolar RNA host gene 16								0.0	0.0	0.0	0.0	0.0	0.0	0.0	0.0	0.0	0.0	0.0	0.0	0.0	0.0	0.0	0.0	0.0	0.0	0.0	0.0
COX16	51241	symbol	H. sapiens	51241	H. sapiens	COX16	cytochrome c oxidase assembly factor COX16	GO:0033617 mitochondrial cytochrome c oxidase assembly;GO:0008535 respiratory chain complex IV assembly;GO:0017004 cytochrome complex assembly		Transporters:Primary Active Transporters; Predicted intracellular proteins	Mitochondria (Supported)				1.0	0.0	0.0	0.0	0.0	1.0	0.0	0.0	0.0	0.0	0.0	0.0	0.0	0.0	0.0	0.0	0.0	0.0	1.0	0.0
UBE2V1	7335	symbol	H. sapiens	7335	H. sapiens	UBE2V1	ubiquitin conjugating enzyme E2 V1	GO:1902523 positive regulation of protein K63-linked ubiquitination;GO:1900044 regulation of protein K63-linked ubiquitination;GO:1902916 positive regulation of protein polyubiquitination		Predicted intracellular proteins	Nucleoplasm (Enhanced)		(M110)PID IL1 PATHWAY		0.0	0.0	1.0	0.0	0.0	0.0	0.0	0.0	0.0	0.0	0.0	0.0	0.0	0.0	0.0	0.0	0.0	0.0	0.0	0.0
RNF166	115992	symbol	H. sapiens	115992	H. sapiens	RNF166	ring finger protein 166	GO:0000209 protein polyubiquitination;GO:0006914 autophagy;GO:0061919 process utilizing autophagic mechanism		Enzymes; Predicted intracellular proteins; ENZYME proteins:Transferases	Nucleoplasm (Approved); Additional: Cytosol;Plasma membrane				0.0	0.0	0.0	0.0	0.0	0.0	0.0	0.0	0.0	0.0	0.0	0.0	0.0	0.0	0.0	0.0	0.0	0.0	0.0	0.0
HAS2-AS1	594842	symbol	H. sapiens	594842	H. sapiens	HAS2-AS1	HAS2 antisense RNA 1								0.0	0.0	0.0	0.0	0.0	0.0	0.0	0.0	0.0	0.0	0.0	0.0	0.0	0.0	0.0	0.0	0.0	0.0	0.0	0.0
SNTB2	6645	symbol	H. sapiens	6645	H. sapiens	SNTB2	syntrophin beta 2			Predicted intracellular proteins	Golgi apparatus;Plasma membrane (Supported); Additional: Nucleoplasm				0.0	0.0	0.0	0.0	0.0	0.0	0.0	0.0	0.0	0.0	0.0	0.0	0.0	0.0	0.0	0.0	0.0	0.0	0.0	0.0
APOA1BP	128240	gene_synonym	H. sapiens	128240	H. sapiens	NAXE	NAD(P)HX epimerase	GO:0031580 membrane raft distribution;GO:0051665 membrane raft localization;GO:0031579 membrane raft organization		Predicted secreted proteins; Disease related genes; Potential drug targets; Enzymes; ENZYME proteins:Isomerase; Human disease related genes:Nervous system diseases:Neurodegenerative diseases	Nucleoplasm (Approved); Additional: Cytosol;Vesicles				0.0	0.0	0.0	0.0	0.0	0.0	0.0	0.0	0.0	0.0	0.0	0.0	0.0	0.0	0.0	0.0	0.0	0.0	0.0	0.0
SCARNA7	677767	symbol	H. sapiens	677767	H. sapiens	SCARNA7	small Cajal body-specific RNA 7	GO:0006396 RNA processing;GO:0016070 RNA metabolic process;GO:0010467 gene expression							0.0	0.0	0.0	0.0	0.0	0.0	0.0	0.0	0.0	0.0	0.0	0.0	0.0	0.0	0.0	0.0	0.0	0.0	0.0	0.0
TXNDC5	81567	symbol	H. sapiens	81567	H. sapiens	TXNDC5	thioredoxin domain containing 5	GO:0043277 apoptotic cell clearance;GO:0006909 phagocytosis;GO:0043066 negative regulation of apoptotic process		Predicted intracellular proteins	Endoplasmic reticulum (Approved)				0.0	0.0	0.0	0.0	0.0	0.0	0.0	0.0	0.0	0.0	0.0	0.0	0.0	0.0	0.0	0.0	0.0	0.0	0.0	0.0
SNORA10	574042	symbol	H. sapiens	574042	H. sapiens	SNORA10	small nucleolar RNA, H/ACA box 10	GO:0006396 RNA processing;GO:0016070 RNA metabolic process;GO:0010467 gene expression							0.0	0.0	0.0	0.0	0.0	0.0	0.0	0.0	0.0	0.0	0.0	0.0	0.0	0.0	0.0	0.0	0.0	0.0	0.0	0.0
HIST1H2BK	85236	gene_synonym	H. sapiens	85236	H. sapiens	H2BC12	H2B clustered histone 12	GO:0002227 innate immune response in mucosa;GO:0002385 mucosal immune response;GO:0031640 killing of cells of other organism		Predicted intracellular proteins	Nucleoplasm (Approved); Additional: Cytosol			(M5901)HALLMARK G2M CHECKPOINT	1.0	1.0	0.0	1.0	0.0	0.0	0.0	0.0	0.0	0.0	0.0	0.0	0.0	0.0	0.0	0.0	0.0	0.0	0.0	0.0
NEK10	152110	symbol	H. sapiens	152110	H. sapiens	NEK10	NIMA related kinase 10	GO:0120197 mucociliary clearance;GO:0003016 respiratory system process;GO:0031954 positive regulation of protein autophosphorylation	NEK Ser/Thr protein kinase family	Kinases:NEK Ser/Thr protein kinases; Predicted intracellular proteins; Disease related genes; Potential drug targets; Enzymes; Human disease related genes:Respiratory diseases:Tracheobronchial diseases; ENZYME proteins:Transferases	Vesicles (Approved); Additional: Nucleoplasm				0.0	0.0	0.0	0.0	0.0	0.0	0.0	0.0	0.0	0.0	0.0	0.0	0.0	0.0	0.0	0.0	0.0	0.0	0.0	0.0
IPO5P1	100132815	symbol	H. sapiens	100132815	H. sapiens	IPO5P1	importin 5 pseudogene 1								0.0	0.0	0.0	0.0	0.0	0.0	0.0	0.0	0.0	0.0	0.0	0.0	0.0	0.0	0.0	0.0	0.0	0.0	0.0	0.0
CGA	1081	symbol	H. sapiens	1081	H. sapiens	CGA	glycoprotein hormones, alpha polypeptide	GO:0046884 follicle-stimulating hormone secretion;GO:0032275 luteinizing hormone secretion;GO:0032274 gonadotropin secretion		Predicted secreted proteins; Cancer-related genes:Candidate cancer biomarkers			(M115)PID REG GR PATHWAY		0.0	0.0	0.0	0.0	0.0	0.0	0.0	1.0	0.0	0.0	0.0	0.0	1.0	0.0	0.0	0.0	1.0	0.0	0.0	0.0
TBX2-AS1	103689912	symbol	H. sapiens	103689912	H. sapiens	TBX2-AS1	TBX2 antisense RNA 1								0.0	0.0	0.0	0.0	0.0	0.0	0.0	0.0	0.0	0.0	0.0	0.0	0.0	0.0	0.0	0.0	0.0	0.0	0.0	0.0
TBX2	6909	symbol	H. sapiens	6909	H. sapiens	TBX2	T-box transcription factor 2	GO:1901208 negative regulation of heart looping;GO:1901210 regulation of cardiac chamber formation;GO:1901211 negative regulation of cardiac chamber formation		Transcription factors:Immunoglobulin fold; Predicted intracellular proteins; Disease related genes	Nucleoplasm (Approved); Additional: Cytosol				0.0	0.0	0.0	0.0	0.0	0.0	1.0	0.0	0.0	0.0	0.0	0.0	1.0	1.0	0.0	0.0	0.0	0.0	0.0	0.0
FOSB	2354	symbol	H. sapiens	2354	H. sapiens	FOSB	FosB proto-oncogene, AP-1 transcription factor subunit	GO:0051412 response to corticosterone;GO:0014072 response to isoquinoline alkaloid;GO:0043278 response to morphine		Transcription factors:Basic domains; Predicted intracellular proteins	Nucleoplasm (Supported); Additional: Vesicles		(M167)PID AP1 PATHWAY	(M5941)HALLMARK UV RESPONSE UP; (M5890)HALLMARK TNFA SIGNALING VIA NFKB	1.0	0.0	0.0	0.0	0.0	0.0	0.0	0.0	0.0	0.0	0.0	0.0	0.0	0.0	0.0	0.0	0.0	0.0	0.0	0.0
SLITRK1	114798	symbol	H. sapiens	114798	H. sapiens	SLITRK1	SLIT and NTRK like family member 1	GO:0099560 synaptic membrane adhesion;GO:0099174 regulation of presynapse organization;GO:1905606 regulation of presynapse assembly		Predicted secreted proteins; Human disease related genes:Other diseases:Mental and behavioural disorders; Disease related genes					0.0	0.0	0.0	0.0	0.0	0.0	0.0	0.0	0.0	0.0	0.0	1.0	0.0	0.0	0.0	0.0	0.0	1.0	0.0	0.0
HIST1H4F	8361	gene_synonym	H. sapiens	8361	H. sapiens	H4C6	H4 clustered histone 6	GO:0045653 negative regulation of megakaryocyte differentiation;GO:0006335 DNA replication-dependent chromatin assembly;GO:0034723 DNA replication-dependent chromatin organization		Predicted intracellular proteins; Disease related genes					1.0	0.0	0.0	0.0	0.0	0.0	0.0	0.0	0.0	0.0	0.0	0.0	0.0	0.0	0.0	0.0	0.0	0.0	0.0	0.0
XKR6	286046	symbol	H. sapiens	286046	H. sapiens	XKR6	XK related 6	GO:0070782 phosphatidylserine exposure on apoptotic cell surface;GO:0043652 engulfment of apoptotic cell;GO:0017121 plasma membrane phospholipid scrambling			Actin filaments (Approved)				0.0	0.0	0.0	0.0	0.0	0.0	0.0	0.0	0.0	0.0	0.0	0.0	0.0	0.0	0.0	0.0	0.0	0.0	0.0	0.0
LOC221946	221946	Gene_ID	H. sapiens	221946	H. sapiens	LOC221946	uncharacterized LOC221946								0.0	0.0	0.0	0.0	0.0	0.0	0.0	0.0	0.0	0.0	0.0	0.0	0.0	0.0	0.0	0.0	0.0	0.0	0.0	0.0
SCO2	9997	symbol	H. sapiens	9997	H. sapiens	SCO2	synthesis of cytochrome C oxidase 2	GO:0006878 cellular copper ion homeostasis;GO:0055070 copper ion homeostasis;GO:0033617 mitochondrial cytochrome c oxidase assembly		Human disease related genes:Nervous system diseases:Eye disease; Disease related genes; Human disease related genes:Congenital disorders of metabolism:Mitochondrial diseases	Mitochondria (Approved)				1.0	0.0	0.0	0.0	0.0	1.0	1.0	0.0	0.0	0.0	0.0	0.0	0.0	0.0	0.0	0.0	0.0	0.0	1.0	0.0
ATP5E	514	gene_synonym	H. sapiens	514	H. sapiens	ATP5F1E	ATP synthase F1 subunit epsilon	GO:0042776 mitochondrial ATP synthesis coupled proton transport;GO:0015985 energy coupled proton transport, down electrochemical gradient;GO:0015986 ATP synthesis coupled proton transport		Predicted intracellular proteins; Disease related genes; Human disease related genes:Congenital disorders of metabolism:Mitochondrial diseases				(M5936)HALLMARK OXIDATIVE PHOSPHORYLATION	1.0	0.0	0.0	0.0	0.0	1.0	0.0	0.0	0.0	0.0	0.0	0.0	0.0	0.0	0.0	0.0	0.0	0.0	1.0	0.0
CENPV	201161	symbol	H. sapiens	201161	H. sapiens	CENPV	centromere protein V	GO:0031508 pericentric heterochromatin assembly;GO:0140462 pericentric heterochromatin organization;GO:0031048 heterochromatin assembly by small RNA		Predicted intracellular proteins	Nucleoplasm (Approved); Additional: Cytosol;Midbody				1.0	0.0	1.0	0.0	0.0	0.0	0.0	0.0	0.0	0.0	0.0	0.0	0.0	0.0	0.0	0.0	0.0	0.0	0.0	0.0
HCN2	610	symbol	H. sapiens	610	H. sapiens	HCN2	hyperpolarization activated cyclic nucleotide gated potassium and sodium channel 2	GO:0071321 cellular response to cGMP;GO:0070305 response to cGMP;GO:0086012 membrane depolarization during cardiac muscle cell action potential		Transporters:Transporter channels and pores; Voltage-gated ion channels:Cyclic Nucleotide-Regulated Channels		Cyclic GMP; Cyclic adenosine monophosphate; Ivabradine			0.0	0.0	0.0	0.0	0.0	0.0	0.0	0.0	0.0	0.0	0.0	1.0	0.0	0.0	0.0	0.0	0.0	0.0	0.0	0.0
SNORD94	692225	symbol	H. sapiens	692225	H. sapiens	SNORD94	small nucleolar RNA, C/D box 94	GO:0006396 RNA processing;GO:0016070 RNA metabolic process;GO:0010467 gene expression							0.0	0.0	0.0	0.0	0.0	0.0	0.0	0.0	0.0	0.0	0.0	0.0	0.0	0.0	0.0	0.0	0.0	0.0	0.0	0.0
JAG2	3714	symbol	H. sapiens	3714	H. sapiens	JAG2	jagged canonical Notch ligand 2	GO:1990134 epithelial cell apoptotic process involved in palatal shelf morphogenesis;GO:0009912 auditory receptor cell fate commitment;GO:0060120 inner ear receptor cell fate commitment			Vesicles (Supported); Additional: Cytosol		(M17)PID NOTCH PATHWAY; (M19)PID P73PATHWAY	(M5944)HALLMARK ANGIOGENESIS; (M5895)HALLMARK WNT BETA CATENIN SIGNALING; (M5939)HALLMARK P53 PATHWAY	1.0	0.0	0.0	0.0	0.0	0.0	1.0	0.0	1.0	0.0	0.0	0.0	0.0	0.0	0.0	0.0	0.0	0.0	0.0	0.0
DACT2	168002	symbol	H. sapiens	168002	H. sapiens	DACT2	dishevelled binding antagonist of beta catenin 2	GO:0072061 inner medullary collecting duct development;GO:1900108 negative regulation of nodal signaling pathway;GO:1900107 regulation of nodal signaling pathway		Predicted intracellular proteins			(M286)PID TGFBR PATHWAY		0.0	0.0	0.0	0.0	0.0	0.0	0.0	0.0	0.0	0.0	0.0	0.0	0.0	0.0	0.0	0.0	0.0	0.0	0.0	0.0
ELAVL2	1993	symbol	H. sapiens	1993	H. sapiens	ELAVL2	ELAV like RNA binding protein 2	GO:0006355 regulation of transcription, DNA-templated;GO:1903506 regulation of nucleic acid-templated transcription;GO:2001141 regulation of RNA biosynthetic process		Predicted intracellular proteins	Nucleoplasm (Approved); Additional: Cytosol				0.0	0.0	0.0	0.0	0.0	0.0	0.0	0.0	0.0	0.0	0.0	0.0	0.0	0.0	0.0	0.0	0.0	0.0	0.0	0.0
RCOR3	55758	symbol	H. sapiens	55758	H. sapiens	RCOR3	REST corepressor 3	GO:0016575 histone deacetylation;GO:0006476 protein deacetylation;GO:0035601 protein deacylation		Transcription factors:Helix-turn-helix domains; Predicted intracellular proteins	Nucleoplasm (Enhanced); Additional: Cytosol				0.0	0.0	0.0	0.0	0.0	0.0	0.0	0.0	0.0	0.0	0.0	0.0	0.0	0.0	0.0	0.0	0.0	0.0	0.0	0.0
AGO1	26523	symbol	H. sapiens	26523	H. sapiens	AGO1	argonaute RISC component 1	GO:0035280 miRNA loading onto RISC involved in gene silencing by miRNA;GO:0010501 RNA secondary structure unwinding;GO:0070922 small RNA loading onto RISC		Predicted intracellular proteins	Cytoplasmic bodies (Supported); Additional: Cytosol				1.0	0.0	0.0	0.0	0.0	1.0	0.0	0.0	0.0	0.0	1.0	0.0	1.0	0.0	0.0	0.0	0.0	0.0	0.0	0.0
KCNN2	3781	symbol	H. sapiens	3781	H. sapiens	KCNN2	potassium calcium-activated channel subfamily N member 2	GO:0098914 membrane repolarization during atrial cardiac muscle cell action potential;GO:0099624 atrial cardiac muscle cell membrane repolarization;GO:0086014 atrial cardiac muscle cell action potential		Voltage-gated ion channels:Calcium-Activated Potassium Channels; FDA approved drug targets:Small molecule drugs; Transporters:Transporter channels and pores	Nucleoplasm;Plasma membrane (Uncertain)				0.0	0.0	0.0	0.0	0.0	0.0	0.0	0.0	0.0	0.0	0.0	1.0	0.0	0.0	0.0	0.0	0.0	0.0	0.0	0.0
BCR	613	symbol	H. sapiens	613	H. sapiens	BCR	BCR activator of RhoGEF and GTPase	GO:0043314 negative regulation of neutrophil degranulation;GO:0060313 negative regulation of blood vessel remodeling;GO:1902564 negative regulation of neutrophil activation		FDA approved drug targets:Small molecule drugs; Cancer-related genes; Disease related genes; Enzymes; Predicted intracellular proteins; ENZYME proteins:Transferases	Cytosol;Plasma membrane (Approved); Additional: Nucleoplasm	Imatinib; Dasatinib; Bosutinib; Ponatinib	(M17200)SA B CELL RECEPTOR COMPLEXES; (M1315)SIG PIP3 SIGNALING IN B LYMPHOCYTES; (M241)PID RAC1 REG PATHWAY	(M5893)HALLMARK MITOTIC SPINDLE	1.0	0.0	0.0	0.0	0.0	0.0	1.0	0.0	1.0	0.0	0.0	0.0	0.0	0.0	0.0	1.0	0.0	0.0	0.0	0.0
SNHG24	79104	gene_synonym	H. sapiens	79104	H. sapiens	MEG8	maternally expressed 8, small nucleolar RNA host gene								0.0	0.0	0.0	0.0	0.0	0.0	0.0	0.0	0.0	0.0	0.0	0.0	0.0	0.0	0.0	0.0	0.0	0.0	0.0	0.0
EIF6	3692	symbol	H. sapiens	3692	H. sapiens	EIF6	eukaryotic translation initiation factor 6	GO:1902626 assembly of large subunit precursor of preribosome;GO:0042256 mature ribosome assembly;GO:0000054 ribosomal subunit export from nucleus		Predicted intracellular proteins	Nucleoplasm (Supported)	Copper			1.0	0.0	0.0	0.0	0.0	0.0	0.0	1.0	0.0	0.0	1.0	0.0	0.0	0.0	0.0	0.0	0.0	0.0	0.0	0.0
IRGQ	126298	symbol	H. sapiens	126298	H. sapiens	IRGQ	immunity related GTPase Q			Predicted intracellular proteins	Vesicles (Approved)				0.0	0.0	0.0	0.0	0.0	0.0	0.0	0.0	0.0	0.0	0.0	0.0	0.0	0.0	0.0	0.0	0.0	0.0	0.0	0.0
MALAT1	378938	symbol	H. sapiens	378938	H. sapiens	MALAT1	metastasis associated lung adenocarcinoma transcript 1	GO:0110024 positive regulation of cardiac muscle myoblast proliferation;GO:0110022 regulation of cardiac muscle myoblast proliferation;GO:2000288 positive regulation of myoblast proliferation							0.0	0.0	0.0	0.0	0.0	0.0	0.0	0.0	0.0	0.0	0.0	0.0	1.0	0.0	0.0	0.0	0.0	0.0	0.0	0.0
LOC100129940	100129940	Gene_ID	H. sapiens	100129940	H. sapiens	HMGA2-AS1	HMGA2 antisense RNA 1								0.0	0.0	0.0	0.0	0.0	0.0	0.0	0.0	0.0	0.0	0.0	0.0	0.0	0.0	0.0	0.0	0.0	0.0	0.0	0.0
ZNF346	23567	symbol	H. sapiens	23567	H. sapiens	ZNF346	zinc finger protein 346			Predicted intracellular proteins	Nucleoplasm (Supported)				0.0	0.0	0.0	0.0	0.0	0.0	0.0	0.0	0.0	0.0	0.0	0.0	0.0	0.0	0.0	0.0	0.0	0.0	0.0	0.0
SCARNA9	619383	symbol	H. sapiens	619383	H. sapiens	SCARNA9	small Cajal body-specific RNA 9	GO:0006396 RNA processing;GO:0016070 RNA metabolic process;GO:0010467 gene expression							0.0	0.0	0.0	0.0	0.0	0.0	0.0	0.0	0.0	0.0	0.0	0.0	0.0	0.0	0.0	0.0	0.0	0.0	0.0	0.0
AARSD1	80755	symbol	H. sapiens	80755	H. sapiens	AARSD1	alanyl-tRNA synthetase domain containing 1	GO:0006419 alanyl-tRNA aminoacylation;GO:0106074 aminoacyl-tRNA metabolism involved in translational fidelity;GO:0006450 regulation of translational fidelity		Predicted intracellular proteins	Cytosol;Nuclear membrane (Approved)				0.0	0.0	0.0	0.0	0.0	0.0	0.0	1.0	0.0	0.0	0.0	0.0	0.0	0.0	0.0	0.0	0.0	0.0	0.0	0.0
FUT10	84750	symbol	H. sapiens	84750	H. sapiens	FUT10	fucosyltransferase 10	GO:0036445 neuronal stem cell division;GO:0036071 N-glycan fucosylation;GO:0048103 somatic stem cell division		Predicted intracellular proteins	Endoplasmic reticulum;Golgi apparatus;Nucleoplasm (Approved)				0.0	0.0	0.0	0.0	0.0	0.0	0.0	0.0	0.0	0.0	0.0	0.0	0.0	0.0	0.0	1.0	0.0	0.0	0.0	0.0
ZNF106	64397	symbol	H. sapiens	64397	H. sapiens	ZNF106	zinc finger protein 106	GO:0008286 insulin receptor signaling pathway;GO:0032869 cellular response to insulin stimulus;GO:0032868 response to insulin		Predicted intracellular proteins	Nucleoli (Approved); Additional: Cytosol;Nucleoplasm				0.0	0.0	0.0	0.0	0.0	0.0	0.0	0.0	0.0	0.0	0.0	0.0	0.0	0.0	0.0	0.0	0.0	0.0	0.0	0.0
PRR26	414235	gene_synonym	H. sapiens	414235	H. sapiens	DIP2C-AS1	DIP2C antisense RNA 1								0.0	0.0	0.0	0.0	0.0	0.0	0.0	0.0	0.0	0.0	0.0	0.0	0.0	0.0	0.0	0.0	0.0	0.0	0.0	0.0
NTRK2	4915	symbol	H. sapiens	4915	H. sapiens	NTRK2	neurotrophic receptor tyrosine kinase 2	GO:0099540 trans-synaptic signaling by neuropeptide;GO:0099551 trans-synaptic signaling by neuropeptide, modulating synaptic transmission;GO:0099538 synaptic signaling via neuropeptide	Tyr protein kinase family	Human disease related genes:Nervous system diseases:Epilepsy; FDA approved drug targets:Small molecule drugs; Cancer-related genes:Candidate cancer biomarkers; Human disease related genes:Cancers:Cancers of eye, brain, and central nervous system; Kinases:Tyr protein kinases; Disease related genes; Enzymes; RAS pathway related proteins; ENZYME proteins:Transferases	Plasma membrane (Supported)	Amitriptyline; Esketamine; Entrectinib; Fostamatinib; Larotrectinib	(M142)PID AJDISS 2PATHWAY; (M100)PID SHP2 PATHWAY; (M187)PID TRKR PATHWAY		1.0	0.0	0.0	0.0	0.0	0.0	1.0	0.0	0.0	0.0	1.0	0.0	0.0	0.0	1.0	1.0	0.0	1.0	0.0	0.0
PLSCR3	57048	symbol	H. sapiens	57048	H. sapiens	PLSCR3	phospholipid scramblase 3	GO:0032049 cardiolipin biosynthetic process;GO:0006655 phosphatidylglycerol biosynthetic process;GO:0032048 cardiolipin metabolic process		Transporters; Predicted intracellular proteins	Mitochondria (Supported)				0.0	0.0	0.0	0.0	0.0	0.0	0.0	0.0	0.0	0.0	0.0	0.0	0.0	0.0	0.0	0.0	0.0	0.0	0.0	0.0
KCNG2	26251	symbol	H. sapiens	26251	H. sapiens	KCNG2	potassium voltage-gated channel modifier subfamily G member 2	GO:0071805 potassium ion transmembrane transport;GO:0006813 potassium ion transport;GO:0051260 protein homooligomerization		Voltage-gated ion channels:Voltage-Gated Potassium Channels					0.0	0.0	0.0	0.0	0.0	0.0	0.0	0.0	0.0	0.0	0.0	1.0	0.0	0.0	0.0	0.0	0.0	0.0	0.0	0.0
ZKSCAN2	342357	symbol	H. sapiens	342357	H. sapiens	ZKSCAN2	zinc finger with KRAB and SCAN domains 2	GO:0006357 regulation of transcription by RNA polymerase II;GO:0006355 regulation of transcription, DNA-templated;GO:1903506 regulation of nucleic acid-templated transcription		Predicted intracellular proteins; Transcription factors:Zinc-coordinating DNA-binding domains	Nucleoplasm (Approved); Additional: Golgi apparatus;Nucleoli fibrillar center				0.0	0.0	0.0	0.0	0.0	0.0	0.0	0.0	0.0	0.0	0.0	0.0	0.0	0.0	0.0	0.0	0.0	0.0	0.0	0.0
SCARNA16	677781	symbol	H. sapiens	677781	H. sapiens	SCARNA16	small Cajal body-specific RNA 16	GO:0006396 RNA processing;GO:0016070 RNA metabolic process;GO:0010467 gene expression							0.0	0.0	0.0	0.0	0.0	0.0	0.0	0.0	0.0	0.0	0.0	0.0	0.0	0.0	0.0	0.0	0.0	0.0	0.0	0.0
SCARNA17	677769	symbol	H. sapiens	677769	H. sapiens	SCARNA17	small Cajal body-specific RNA 17	GO:0006396 RNA processing;GO:0016070 RNA metabolic process;GO:0010467 gene expression							0.0	0.0	0.0	0.0	0.0	0.0	0.0	0.0	0.0	0.0	0.0	0.0	0.0	0.0	0.0	0.0	0.0	0.0	0.0	0.0
RDH14	57665	symbol	H. sapiens	57665	H. sapiens	RDH14	retinol dehydrogenase 14	GO:0042572 retinol metabolic process;GO:0001523 retinoid metabolic process;GO:0016101 diterpenoid metabolic process		Enzymes; Predicted intracellular proteins; ENZYME proteins:Oxidoreductases	Nucleoplasm (Enhanced); Additional: Cytosol	Vitamin A			1.0	0.0	0.0	0.0	0.0	0.0	0.0	0.0	0.0	1.0	0.0	0.0	0.0	0.0	0.0	0.0	0.0	0.0	0.0	0.0
RPL13AP20	387841	symbol	H. sapiens	387841	H. sapiens	RPL13AP20	ribosomal protein L13a pseudogene 20								0.0	0.0	0.0	0.0	0.0	0.0	0.0	0.0	0.0	0.0	0.0	0.0	0.0	0.0	0.0	0.0	0.0	0.0	0.0	0.0
BDH1	622	symbol	H. sapiens	622	H. sapiens	BDH1	3-hydroxybutyrate dehydrogenase 1	GO:0006629 lipid metabolic process;GO:0044238 primary metabolic process;GO:0071704 organic substance metabolic process		Enzymes; Predicted intracellular proteins; Candidate cardiovascular disease genes; ENZYME proteins:Oxidoreductases	Mitochondria (Approved)	NADH	(M106)PID HNF3B PATHWAY		0.0	0.0	0.0	0.0	0.0	0.0	0.0	0.0	0.0	0.0	0.0	0.0	0.0	0.0	0.0	0.0	0.0	0.0	0.0	0.0
CNKSR3	154043	symbol	H. sapiens	154043	H. sapiens	CNKSR3	CNKSR family member 3	GO:2000651 positive regulation of sodium ion transmembrane transporter activity;GO:1902307 positive regulation of sodium ion transmembrane transport;GO:0033137 negative regulation of peptidyl-serine phosphorylation		Predicted intracellular proteins	Cytosol (Supported); Additional: Mitochondria				0.0	0.0	0.0	0.0	0.0	0.0	0.0	0.0	0.0	0.0	0.0	0.0	0.0	0.0	0.0	0.0	0.0	0.0	0.0	0.0
TMEM120B	144404	symbol	H. sapiens	144404	H. sapiens	TMEM120B	transmembrane protein 120B	GO:0051291 protein heterooligomerization;GO:0045444 fat cell differentiation;GO:0051259 protein complex oligomerization		Predicted intracellular proteins	Nucleoli fibrillar center (Approved); Additional: Cytosol				0.0	0.0	0.0	0.0	0.0	0.0	0.0	0.0	0.0	0.0	0.0	0.0	0.0	0.0	0.0	0.0	0.0	0.0	0.0	0.0
CDK6	1021	symbol	H. sapiens	1021	H. sapiens	CDK6	cyclin dependent kinase 6	GO:0043696 dedifferentiation;GO:0043697 cell dedifferentiation;GO:0045656 negative regulation of monocyte differentiation	CMGC Ser/Thr protein kinase family	FDA approved drug targets:Small molecule drugs; Human disease related genes:Congenital malformations:Congenital malformations of the nervous system; Cancer-related genes:Candidate cancer biomarkers; Kinases:CMGC Ser/Thr protein kinases; Disease related genes; Enzymes; Predicted intracellular proteins; ENZYME proteins:Transferases	Nucleoplasm (Supported); Additional: Cytosol	Alvocidib; (2S)-2-({6-[(3-Amino-5-chlorophenyl)amino]-9-isopropyl-9H-purin-2-yl}amino)-3-methyl-1-butanol; Fisetin; Palbociclib; Ribociclib; Abemaciclib	(M234)PID IL2 STAT5 PATHWAY; (M58)PID AR PATHWAY; (M279)PID RB 1PATHWAY	(M5919)HALLMARK HEDGEHOG SIGNALING; (M5908)HALLMARK ANDROGEN RESPONSE	1.0	0.0	0.0	0.0	0.0	0.0	0.0	0.0	1.0	0.0	1.0	0.0	1.0	1.0	0.0	1.0	0.0	0.0	0.0	0.0
C19orf52	90580	gene_synonym	H. sapiens	90580	H. sapiens	TIMM29	translocase of inner mitochondrial membrane 29	GO:0045039 protein insertion into mitochondrial inner membrane;GO:0051204 protein insertion into mitochondrial membrane;GO:0090151 establishment of protein localization to mitochondrial membrane		Predicted intracellular proteins	Mitochondria (Supported); Additional: Nucleoplasm				0.0	0.0	0.0	0.0	0.0	0.0	0.0	0.0	0.0	0.0	0.0	0.0	0.0	0.0	0.0	0.0	0.0	0.0	1.0	0.0
SNORA71C	677839	symbol	H. sapiens	677839	H. sapiens	SNORA71C	small nucleolar RNA, H/ACA box 71C	GO:0006396 RNA processing;GO:0016070 RNA metabolic process;GO:0010467 gene expression							0.0	0.0	0.0	0.0	0.0	0.0	0.0	0.0	0.0	0.0	0.0	0.0	0.0	0.0	0.0	0.0	0.0	0.0	0.0	0.0
ZNRF2P1	441208	symbol	H. sapiens	441208	H. sapiens	ZNRF2P1	zinc and ring finger 2 pseudogene 1								0.0	0.0	0.0	0.0	0.0	0.0	0.0	0.0	0.0	0.0	0.0	0.0	0.0	0.0	0.0	0.0	0.0	0.0	0.0	0.0
GRM4	2914	symbol	H. sapiens	2914	H. sapiens	GRM4	glutamate metabotropic receptor 4	GO:0007196 adenylate cyclase-inhibiting G protein-coupled glutamate receptor signaling pathway;GO:0007216 G protein-coupled glutamate receptor signaling pathway;GO:0007215 glutamate receptor signaling pathway		G-protein coupled receptors:GPCRs excl olfactory receptors; G-protein coupled receptors:Family 3 (C) receptors; Predicted intracellular proteins		Glutamic acid			0.0	0.0	0.0	0.0	0.0	0.0	0.0	0.0	0.0	0.0	0.0	0.0	0.0	0.0	1.0	0.0	0.0	0.0	0.0	0.0
CACNA2D3	55799	symbol	H. sapiens	55799	H. sapiens	CACNA2D3	calcium voltage-gated channel auxiliary subunit alpha2delta 3	GO:0070588 calcium ion transmembrane transport;GO:0006816 calcium ion transport;GO:0034765 regulation of ion transmembrane transport		Transporters:Accessory Factors Involved in Transport; FDA approved drug targets:Small molecule drugs; Predicted intracellular proteins	Nucleoplasm (Uncertain)	Amlodipine; Nilvadipine			0.0	0.0	0.0	0.0	0.0	0.0	0.0	0.0	0.0	0.0	0.0	1.0	0.0	0.0	0.0	0.0	0.0	0.0	0.0	0.0
SCARNA22	677770	symbol	H. sapiens	677770	H. sapiens	SCARNA22	small Cajal body-specific RNA 22	GO:0006396 RNA processing;GO:0016070 RNA metabolic process;GO:0010467 gene expression							0.0	0.0	0.0	0.0	0.0	0.0	0.0	0.0	0.0	0.0	0.0	0.0	0.0	0.0	0.0	0.0	0.0	0.0	0.0	0.0
SNORA7B	677797	symbol	H. sapiens	677797	H. sapiens	SNORA7B	small nucleolar RNA, H/ACA box 7B	GO:0006396 RNA processing;GO:0016070 RNA metabolic process;GO:0010467 gene expression							0.0	0.0	0.0	0.0	0.0	0.0	0.0	0.0	0.0	0.0	0.0	0.0	0.0	0.0	0.0	0.0	0.0	0.0	0.0	0.0
FHOD1	29109	symbol	H. sapiens	29109	H. sapiens	FHOD1	formin homology 2 domain containing 1	GO:0051660 establishment of centrosome localization;GO:0051639 actin filament network formation;GO:0007097 nuclear migration		Predicted intracellular proteins	Cytosol (Supported)				0.0	0.0	0.0	0.0	0.0	0.0	0.0	0.0	0.0	0.0	0.0	0.0	0.0	0.0	0.0	0.0	0.0	0.0	0.0	0.0
TMPPE	643853	symbol	H. sapiens	643853	H. sapiens	TMPPE	transmembrane protein with metallophosphoesterase domain			Predicted intracellular proteins	Mitochondria;Nucleoplasm (Approved)				0.0	0.0	0.0	0.0	0.0	0.0	0.0	0.0	0.0	0.0	0.0	0.0	0.0	0.0	0.0	0.0	0.0	0.0	0.0	0.0
OVCA2	124641	symbol	H. sapiens	124641	H. sapiens	OVCA2	OVCA2 serine hydrolase domain containing	GO:0032526 response to retinoic acid;GO:0033993 response to lipid;GO:1901700 response to oxygen-containing compound		Predicted intracellular proteins	Nucleoplasm (Supported); Additional: Cytosol				0.0	0.0	0.0	0.0	0.0	0.0	0.0	0.0	0.0	0.0	0.0	0.0	0.0	0.0	0.0	0.0	0.0	0.0	0.0	0.0
SNORA53	677832	symbol	H. sapiens	677832	H. sapiens	SNORA53	small nucleolar RNA, H/ACA box 53	GO:0006396 RNA processing;GO:0016070 RNA metabolic process;GO:0010467 gene expression							0.0	0.0	0.0	0.0	0.0	0.0	0.0	0.0	0.0	0.0	0.0	0.0	0.0	0.0	0.0	0.0	0.0	0.0	0.0	0.0
LAGE3	8270	symbol	H. sapiens	8270	H. sapiens	LAGE3	L antigen family member 3	GO:0070525 tRNA threonylcarbamoyladenosine metabolic process;GO:0008033 tRNA processing;GO:0006399 tRNA metabolic process		Human disease related genes:Congenital malformations:Congenital malformations of the nervous system; Predicted intracellular proteins; Disease related genes	Nucleoplasm (Supported); Additional: Nuclear bodies				0.0	0.0	0.0	0.0	0.0	0.0	0.0	0.0	0.0	0.0	0.0	0.0	0.0	0.0	0.0	0.0	0.0	0.0	0.0	0.0
FAM173A	65990	gene_synonym	H. sapiens	65990	H. sapiens	ANTKMT	adenine nucleotide translocase lysine methyltransferase	GO:1905271 regulation of proton-transporting ATP synthase activity, rotational mechanism;GO:1905273 positive regulation of proton-transporting ATP synthase activity, rotational mechanism;GO:1905706 regulation of mitochondrial ATP synthesis coupled proton transport		Predicted intracellular proteins	Cytosol (Approved)				0.0	0.0	0.0	0.0	1.0	0.0	0.0	0.0	0.0	0.0	0.0	0.0	0.0	0.0	0.0	0.0	0.0	0.0	0.0	0.0
FJX1	24147	symbol	H. sapiens	24147	H. sapiens	FJX1	four-jointed box kinase 1	GO:0010842 retina layer formation;GO:0060042 retina morphogenesis in camera-type eye;GO:0003407 neural retina development		Predicted intracellular proteins	Vesicles (Approved)			(M5890)HALLMARK TNFA SIGNALING VIA NFKB	0.0	0.0	0.0	0.0	0.0	0.0	1.0	0.0	0.0	0.0	0.0	0.0	0.0	0.0	0.0	0.0	0.0	0.0	0.0	0.0
SCAP	22937	symbol	H. sapiens	22937	H. sapiens	SCAP	SREBF chaperone	GO:0045541 negative regulation of cholesterol biosynthetic process;GO:0090206 negative regulation of cholesterol metabolic process;GO:0106119 negative regulation of sterol biosynthetic process					(M7997)SA CASPASE CASCADE		0.0	0.0	0.0	0.0	0.0	0.0	0.0	0.0	0.0	0.0	0.0	0.0	0.0	0.0	0.0	0.0	0.0	0.0	0.0	0.0
ZNF850	342892	symbol	H. sapiens	342892	H. sapiens	ZNF850	zinc finger protein 850	GO:0045944 positive regulation of transcription by RNA polymerase II;GO:0045893 positive regulation of transcription, DNA-templated;GO:1903508 positive regulation of nucleic acid-templated transcription		Predicted intracellular proteins	Nucleoplasm (Approved)				0.0	0.0	0.0	0.0	0.0	0.0	0.0	0.0	0.0	0.0	0.0	0.0	0.0	0.0	0.0	0.0	0.0	0.0	0.0	0.0
REPS2	9185	symbol	H. sapiens	9185	H. sapiens	REPS2	RALBP1 associated Eps domain containing 2	GO:0007173 epidermal growth factor receptor signaling pathway;GO:0038127 ERBB signaling pathway;GO:0016197 endosomal transport		Predicted intracellular proteins					0.0	0.0	0.0	0.0	0.0	0.0	0.0	0.0	0.0	0.0	0.0	0.0	0.0	0.0	0.0	0.0	0.0	0.0	0.0	0.0
KRT19	3880	symbol	H. sapiens	3880	H. sapiens	KRT19	keratin 19	GO:0060706 cell differentiation involved in embryonic placenta development;GO:0045214 sarcomere organization;GO:0045109 intermediate filament organization		Predicted intracellular proteins; Cancer-related genes:Candidate cancer biomarkers	Intermediate filaments (Supported)		(M229)PID P38 ALPHA BETA DOWNSTREAM PATHWAY	(M5908)HALLMARK ANDROGEN RESPONSE; (M5906)HALLMARK ESTROGEN RESPONSE EARLY; (M5907)HALLMARK ESTROGEN RESPONSE LATE	0.0	0.0	0.0	0.0	0.0	0.0	0.0	0.0	0.0	0.0	0.0	0.0	0.0	0.0	0.0	0.0	0.0	0.0	0.0	0.0
LOC100499194	100499194	Gene_ID	H. sapiens	100499194	H. sapiens	LOC100499194	uncharacterized LOC100499194								0.0	0.0	0.0	0.0	0.0	0.0	0.0	0.0	0.0	0.0	0.0	0.0	0.0	0.0	0.0	0.0	0.0	0.0	0.0	0.0
TAGLN3	29114	symbol	H. sapiens	29114	H. sapiens	TAGLN3	transgelin 3	GO:0000122 negative regulation of transcription by RNA polymerase II;GO:0007417 central nervous system development;GO:0045892 negative regulation of transcription, DNA-templated		Predicted intracellular proteins					0.0	0.0	0.0	0.0	0.0	0.0	0.0	0.0	0.0	0.0	0.0	0.0	0.0	0.0	0.0	0.0	0.0	0.0	0.0	0.0
LOC100133091	100133091	Gene_ID	H. sapiens	100133091	H. sapiens	LOC100133091	uncharacterized LOC100133091								0.0	0.0	0.0	0.0	0.0	0.0	0.0	0.0	0.0	0.0	0.0	0.0	0.0	0.0	0.0	0.0	0.0	0.0	0.0	0.0
ZSCAN18	65982	symbol	H. sapiens	65982	H. sapiens	ZSCAN18	zinc finger and SCAN domain containing 18	GO:0006357 regulation of transcription by RNA polymerase II;GO:0006355 regulation of transcription, DNA-templated;GO:1903506 regulation of nucleic acid-templated transcription		Predicted intracellular proteins	Nucleoplasm (Approved)				0.0	0.0	0.0	0.0	0.0	0.0	0.0	0.0	0.0	0.0	0.0	0.0	0.0	0.0	0.0	0.0	0.0	0.0	0.0	0.0
IL11	3589	symbol	H. sapiens	3589	H. sapiens	IL11	interleukin 11	GO:0030219 megakaryocyte differentiation;GO:0046888 negative regulation of hormone secretion;GO:0045444 fat cell differentiation		Predicted secreted proteins; Predicted intracellular proteins; Cancer-related genes:Candidate cancer biomarkers			(M5883)NABA SECRETED FACTORS; (M5885)NABA MATRISOME ASSOCIATED; (M5889)NABA MATRISOME	(M5950)HALLMARK ALLOGRAFT REJECTION	0.0	0.0	1.0	0.0	0.0	0.0	0.0	0.0	0.0	0.0	0.0	0.0	0.0	0.0	0.0	0.0	0.0	0.0	0.0	0.0
POU5F1P5	100009667	symbol	H. sapiens	100009667	H. sapiens	POU5F1P5	POU class 5 homeobox 1 pseudogene 5								0.0	0.0	0.0	0.0	0.0	0.0	0.0	0.0	0.0	0.0	0.0	0.0	0.0	0.0	0.0	0.0	0.0	0.0	0.0	0.0
LOC439994	439994	Gene_ID	H. sapiens	439994	H. sapiens	LINC00863	long intergenic non-protein coding RNA 863								0.0	0.0	0.0	0.0	0.0	0.0	0.0	0.0	0.0	0.0	0.0	0.0	0.0	0.0	0.0	0.0	0.0	0.0	0.0	0.0
ZNF518B	85460	symbol	H. sapiens	85460	H. sapiens	ZNF518B	zinc finger protein 518B	GO:0006325 chromatin organization;GO:0051276 chromosome organization;GO:0006357 regulation of transcription by RNA polymerase II		Predicted intracellular proteins; Transcription factors:Zinc-coordinating DNA-binding domains	Nucleoplasm (Approved)				1.0	0.0	0.0	0.0	0.0	0.0	0.0	0.0	0.0	0.0	0.0	0.0	0.0	0.0	0.0	0.0	0.0	0.0	0.0	0.0
RBM4	5936	symbol	H. sapiens	5936	H. sapiens	RBM4	RNA binding motif protein 4	GO:0002190 cap-independent translational initiation;GO:0002192 IRES-dependent translational initiation of linear mRNA;GO:0110017 cap-independent translational initiation of linear mRNA		Predicted intracellular proteins	Nucleoplasm (Approved); Additional: Cytosol			(M5953)HALLMARK KRAS SIGNALING UP	0.0	0.0	0.0	0.0	0.0	0.0	0.0	1.0	0.0	0.0	1.0	0.0	0.0	0.0	0.0	0.0	0.0	0.0	0.0	0.0
RASL10B	91608	symbol	H. sapiens	91608	H. sapiens	RASL10B	RAS like family 10 member B	GO:0003050 regulation of systemic arterial blood pressure by atrial natriuretic peptide;GO:0001990 regulation of systemic arterial blood pressure by hormone;GO:0003044 regulation of systemic arterial blood pressure mediated by a chemical signal		Enzymes; ENZYME proteins:Hydrolases; Predicted intracellular proteins	Vesicles (Approved)				0.0	0.0	0.0	0.0	0.0	0.0	0.0	0.0	0.0	0.0	0.0	0.0	0.0	0.0	0.0	0.0	0.0	0.0	0.0	0.0
ISG15	9636	symbol	H. sapiens	9636	H. sapiens	ISG15	ISG15 ubiquitin like modifier	GO:0032461 positive regulation of protein oligomerization;GO:0032459 regulation of protein oligomerization;GO:0032020 ISG15-protein conjugation		Human disease related genes:Immune system diseases:Primary immunodeficiency; Predicted secreted proteins; Predicted intracellular proteins; Disease related genes				(M5911)HALLMARK INTERFERON ALPHA RESPONSE; (M5913)HALLMARK INTERFERON GAMMA RESPONSE	1.0	0.0	1.0	0.0	0.0	0.0	0.0	1.0	1.0	0.0	0.0	0.0	0.0	0.0	0.0	0.0	0.0	0.0	1.0	0.0
SCD5	79966	symbol	H. sapiens	79966	H. sapiens	SCD5	stearoyl-CoA desaturase 5	GO:1903966 monounsaturated fatty acid biosynthetic process;GO:1903964 monounsaturated fatty acid metabolic process;GO:0006636 unsaturated fatty acid biosynthetic process		Enzymes; ENZYME proteins:Oxidoreductases					0.0	0.0	0.0	0.0	0.0	0.0	0.0	0.0	0.0	0.0	0.0	0.0	0.0	0.0	0.0	0.0	0.0	0.0	0.0	0.0
EIF2S3	1968	symbol	H. sapiens	1968	H. sapiens	EIF2S3	eukaryotic translation initiation factor 2 subunit gamma	GO:0045903 positive regulation of translational fidelity;GO:0001731 formation of translation preinitiation complex;GO:0006450 regulation of translational fidelity		ENZYME proteins:Hydrolases; Human disease related genes:Congenital malformations:Other congenital malformations; Disease related genes; Potential drug targets; Enzymes; Predicted intracellular proteins		Guanosine-5'-Diphosphate		(M5941)HALLMARK UV RESPONSE UP	1.0	0.0	0.0	0.0	0.0	0.0	0.0	1.0	0.0	0.0	0.0	0.0	0.0	0.0	0.0	0.0	0.0	0.0	0.0	0.0
SCARNA6	677772	symbol	H. sapiens	677772	H. sapiens	SCARNA6	small Cajal body-specific RNA 6	GO:0006396 RNA processing;GO:0016070 RNA metabolic process;GO:0010467 gene expression							0.0	0.0	0.0	0.0	0.0	0.0	0.0	0.0	0.0	0.0	0.0	0.0	0.0	0.0	0.0	0.0	0.0	0.0	0.0	0.0
BCAM	4059	symbol	H. sapiens	4059	H. sapiens	BCAM	basal cell adhesion molecule (Lutheran blood group)	GO:0007160 cell-matrix adhesion;GO:0031589 cell-substrate adhesion;GO:0007155 cell adhesion		Blood group antigen proteins; Predicted intracellular proteins; CD markers	Nucleoli fibrillar center (Approved)			(M5898)HALLMARK DNA REPAIR; (M5945)HALLMARK HEME METABOLISM	0.0	0.0	0.0	0.0	0.0	0.0	0.0	0.0	0.0	0.0	0.0	0.0	0.0	0.0	0.0	0.0	0.0	0.0	0.0	0.0
SNORA64	26784	symbol	H. sapiens	26784	H. sapiens	SNORA64	small nucleolar RNA, H/ACA box 64	GO:0006396 RNA processing;GO:0016070 RNA metabolic process;GO:0010467 gene expression							0.0	0.0	0.0	0.0	0.0	0.0	0.0	0.0	0.0	0.0	0.0	0.0	0.0	0.0	0.0	0.0	0.0	0.0	0.0	0.0
SYNE3	161176	symbol	H. sapiens	161176	H. sapiens	SYNE3	spectrin repeat containing nuclear envelope family member 3	GO:0007097 nuclear migration;GO:0051647 nucleus localization;GO:0008360 regulation of cell shape		Predicted intracellular proteins	Nuclear membrane (Supported)				0.0	0.0	0.0	0.0	0.0	0.0	0.0	0.0	0.0	0.0	0.0	0.0	0.0	0.0	0.0	0.0	0.0	0.0	0.0	0.0
CTB-113P19.1						None	None	None	None	None	None	None	None	None	nan	nan	nan	nan	nan	nan	nan	nan	nan	nan	nan	nan	nan	nan	nan	nan	nan	nan	nan	nan
FBN2	2201	symbol	H. sapiens	2201	H. sapiens	FBN2	fibrillin 2	GO:0035583 sequestering of TGFbeta in extracellular matrix;GO:0060346 bone trabecula formation;GO:0071694 maintenance of protein location in extracellular region		Predicted secreted proteins; Cancer-related genes:Mutational cancer driver genes; Human disease related genes:Congenital malformations:Congenital malformations of the musculoskeletal system; Human disease related genes:Congenital malformations:Other congenital malformations; Disease related genes; Predicted intracellular proteins	Cytosol (Approved); Additional: Nucleoplasm	Calcium citrate; Calcium Phosphate; Calcium phosphate dihydrate	(M3008)NABA ECM GLYCOPROTEINS; (M5884)NABA CORE MATRISOME; (M5889)NABA MATRISOME	(M5930)HALLMARK EPITHELIAL MESENCHYMAL TRANSITION	0.0	0.0	0.0	0.0	0.0	0.0	1.0	0.0	1.0	0.0	0.0	0.0	0.0	1.0	0.0	0.0	0.0	0.0	0.0	0.0
LSM12	124801	symbol	H. sapiens	124801	H. sapiens	LSM12	LSM12 homolog			Predicted intracellular proteins	Cytosol (Approved)				0.0	0.0	0.0	0.0	0.0	0.0	0.0	0.0	0.0	0.0	0.0	0.0	0.0	0.0	0.0	0.0	0.0	0.0	0.0	0.0
C1QBP	708	symbol	H. sapiens	708	H. sapiens	C1QBP	complement C1q binding protein	GO:0039534 negative regulation of MDA-5 signaling pathway;GO:0042256 mature ribosome assembly;GO:1901165 positive regulation of trophoblast cell migration		Transporters; Cancer-related genes:Candidate cancer biomarkers; Predicted secreted proteins; Disease related genes; Potential drug targets; Predicted intracellular proteins; Human disease related genes:Congenital disorders of metabolism:Mitochondrial diseases	Plasma membrane (Approved); Additional: Mitochondria	Hyaluronic acid; Copper		(M5926)HALLMARK MYC TARGETS V1	1.0	0.0	0.0	0.0	0.0	0.0	0.0	0.0	0.0	0.0	1.0	0.0	0.0	0.0	0.0	0.0	0.0	0.0	0.0	0.0
LOC728392	728392	Gene_ID	H. sapiens	728392	H. sapiens	LOC728392	uncharacterized LOC728392								0.0	0.0	0.0	0.0	0.0	0.0	0.0	0.0	0.0	0.0	0.0	0.0	0.0	0.0	0.0	0.0	0.0	0.0	0.0	0.0
ZNF805	390980	symbol	H. sapiens	390980	H. sapiens	ZNF805	zinc finger protein 805	GO:0006357 regulation of transcription by RNA polymerase II;GO:0006355 regulation of transcription, DNA-templated;GO:1903506 regulation of nucleic acid-templated transcription		Predicted intracellular proteins; Transcription factors:Zinc-coordinating DNA-binding domains	Nucleoplasm (Approved)				0.0	0.0	0.0	0.0	0.0	0.0	0.0	0.0	0.0	0.0	0.0	0.0	0.0	0.0	0.0	0.0	0.0	0.0	0.0	0.0
MIR4466	100616154	symbol	H. sapiens	100616154	H. sapiens	MIR4466	microRNA 4466								0.0	0.0	0.0	0.0	0.0	0.0	0.0	0.0	0.0	0.0	0.0	0.0	0.0	0.0	0.0	0.0	0.0	0.0	0.0	0.0
RABEPK	10244	symbol	H. sapiens	10244	H. sapiens	RABEPK	Rab9 effector protein with kelch motifs	GO:0006904 vesicle docking involved in exocytosis;GO:0048278 vesicle docking;GO:0140029 exocytic process		Predicted intracellular proteins	Plasma membrane (Uncertain)			(M5928)HALLMARK MYC TARGETS V2	0.0	0.0	0.0	0.0	0.0	0.0	0.0	0.0	0.0	0.0	0.0	0.0	0.0	0.0	0.0	0.0	0.0	0.0	0.0	0.0
WBP1	23559	symbol	H. sapiens	23559	H. sapiens	WBP1	WW domain binding protein 1	GO:0008150 biological_process			Cytosol (Approved)				0.0	0.0	0.0	0.0	0.0	0.0	0.0	0.0	0.0	0.0	0.0	0.0	0.0	0.0	0.0	0.0	0.0	0.0	0.0	0.0
EYA3	2140	symbol	H. sapiens	2140	H. sapiens	EYA3	EYA transcriptional coactivator and phosphatase 3	GO:0016576 histone dephosphorylation;GO:1901099 negative regulation of signal transduction in absence of ligand;GO:2001240 negative regulation of extrinsic apoptotic signaling pathway in absence of ligand		Enzymes; ENZYME proteins:Hydrolases; Predicted intracellular proteins	Nucleoplasm (Supported)				1.0	0.0	0.0	0.0	0.0	0.0	0.0	0.0	0.0	0.0	0.0	0.0	0.0	0.0	0.0	0.0	0.0	0.0	0.0	0.0
BLID	414899	symbol	H. sapiens	414899	H. sapiens	BLID	BH3-like motif containing, cell death inducer	GO:0043280 positive regulation of cysteine-type endopeptidase activity involved in apoptotic process;GO:2001056 positive regulation of cysteine-type endopeptidase activity;GO:0010950 positive regulation of endopeptidase activity		Predicted intracellular proteins					0.0	0.0	0.0	0.0	0.0	0.0	0.0	0.0	0.0	0.0	0.0	0.0	0.0	0.0	0.0	0.0	0.0	0.0	0.0	0.0
KPNA6	23633	symbol	H. sapiens	23633	H. sapiens	KPNA6	karyopherin subunit alpha 6	GO:0075506 entry of viral genome into host nucleus through nuclear pore complex via importin;GO:0075732 viral penetration into host nucleus;GO:0075733 intracellular transport of virus		Transporters:Transporter channels and pores; Predicted intracellular proteins	Cytosol (Approved); Additional: Nucleoplasm				1.0	0.0	0.0	0.0	0.0	0.0	0.0	0.0	0.0	0.0	0.0	0.0	0.0	0.0	0.0	0.0	0.0	0.0	0.0	0.0
SLC4A7	9497	symbol	H. sapiens	9497	H. sapiens	SLC4A7	solute carrier family 4 member 7	GO:0060117 auditory receptor cell development;GO:0015701 bicarbonate transport;GO:0042491 inner ear auditory receptor cell differentiation		Transporters:Electrochemical Potential-driven transporters	Plasma membrane (Supported); Additional: Cytosol;Focal adhesion sites				1.0	0.0	0.0	0.0	0.0	0.0	1.0	0.0	0.0	0.0	0.0	0.0	0.0	0.0	0.0	0.0	0.0	0.0	0.0	0.0
PWARSN	347746	symbol	H. sapiens	347746	H. sapiens	PWARSN	Prader Willi/Angelman region RNA, SNRPN neighbor	GO:0006396 RNA processing;GO:0016070 RNA metabolic process;GO:0010467 gene expression							0.0	0.0	0.0	0.0	0.0	0.0	0.0	0.0	0.0	0.0	0.0	0.0	0.0	0.0	0.0	0.0	0.0	0.0	0.0	0.0
SNORA21	619505	symbol	H. sapiens	619505	H. sapiens	SNORA21	small nucleolar RNA, H/ACA box 21	GO:0006396 RNA processing;GO:0016070 RNA metabolic process;GO:0010467 gene expression							0.0	0.0	0.0	0.0	0.0	0.0	0.0	0.0	0.0	0.0	0.0	0.0	0.0	0.0	0.0	0.0	0.0	0.0	0.0	0.0
HIST1H4L	8368	gene_synonym	H. sapiens	8368	H. sapiens	H4C13	H4 clustered histone 13	GO:0045653 negative regulation of megakaryocyte differentiation;GO:0006335 DNA replication-dependent chromatin assembly;GO:0034723 DNA replication-dependent chromatin organization		Predicted intracellular proteins; Disease related genes					1.0	0.0	0.0	0.0	0.0	0.0	0.0	0.0	0.0	0.0	0.0	0.0	0.0	0.0	0.0	0.0	0.0	0.0	0.0	0.0
SNORA44	677825	symbol	H. sapiens	677825	H. sapiens	SNORA44	small nucleolar RNA, H/ACA box 44	GO:0006396 RNA processing;GO:0016070 RNA metabolic process;GO:0010467 gene expression							0.0	0.0	0.0	0.0	0.0	0.0	0.0	0.0	0.0	0.0	0.0	0.0	0.0	0.0	0.0	0.0	0.0	0.0	0.0	0.0
NOS1	4842	symbol	H. sapiens	4842	H. sapiens	NOS1	nitric oxide synthase 1	GO:0098923 retrograde trans-synaptic signaling by soluble gas;GO:0098924 retrograde trans-synaptic signaling by nitric oxide;GO:0051581 negative regulation of neurotransmitter uptake		FDA approved drug targets:Small molecule drugs; ENZYME proteins:Oxidoreductases; Cancer-related genes:Candidate cancer biomarkers; Enzymes; Predicted intracellular proteins	Plasma membrane (Supported); Additional: Nucleoplasm	Citrulline; Donepezil; Ketamine; L-N(omega)-Nitroarginine-2,4-L-diaminobutyric amide; Formic acid; 3-Bromo-7-Nitroindazole; N-{(4S)-4-Amino-5-[(2-aminoethyl)amino]pentyl}-N'-nitroguanidine; N-[3-(aminomethyl)benzyl]acetamidine; L-N(omega)-nitroarginine-(4R)-amino-L-proline amide; 1-hydroxy-2-isopropylguanidine; N-omega-propyl-L-arginine; 2-butyl-1-hydroxyguanidine; S-Ethyl-N-[4-(Trifluoromethyl)P…		(M5951)HALLMARK SPERMATOGENESIS; (M5909)HALLMARK MYOGENESIS; (M5956)HALLMARK KRAS SIGNALING DN	0.0	0.0	0.0	0.0	0.0	0.0	0.0	0.0	0.0	0.0	0.0	0.0	0.0	0.0	0.0	0.0	1.0	0.0	0.0	1.0
GALNT16	57452	symbol	H. sapiens	57452	H. sapiens	GALNT16	polypeptide N-acetylgalactosaminyltransferase 16	GO:0018243 protein O-linked glycosylation via threonine;GO:0018242 protein O-linked glycosylation via serine;GO:0018210 peptidyl-threonine modification		Enzymes; Predicted intracellular proteins; ENZYME proteins:Transferases	Cytosol;Vesicles (Approved)				0.0	0.0	0.0	0.0	0.0	0.0	0.0	0.0	0.0	0.0	0.0	0.0	0.0	0.0	0.0	0.0	0.0	0.0	0.0	0.0
CBX6	23466	symbol	H. sapiens	23466	H. sapiens	CBX6	chromobox 6	GO:0006325 chromatin organization;GO:0051276 chromosome organization;GO:0000122 negative regulation of transcription by RNA polymerase II		Predicted intracellular proteins	Mitochondria;Nucleoplasm (Approved)				1.0	0.0	0.0	0.0	0.0	0.0	0.0	0.0	0.0	0.0	0.0	0.0	0.0	0.0	0.0	0.0	0.0	0.0	0.0	0.0
SNORA16A	692073	symbol	H. sapiens	692073	H. sapiens	SNORA16A	small nucleolar RNA, H/ACA box 16A	GO:0006396 RNA processing;GO:0016070 RNA metabolic process;GO:0010467 gene expression							0.0	0.0	0.0	0.0	0.0	0.0	0.0	0.0	0.0	0.0	0.0	0.0	0.0	0.0	0.0	0.0	0.0	0.0	0.0	0.0
GLCCI1	113263	symbol	H. sapiens	113263	H. sapiens	GLCCI1	glucocorticoid induced 1			Predicted intracellular proteins	Nucleoli (Approved)				0.0	0.0	0.0	0.0	0.0	0.0	0.0	0.0	0.0	0.0	0.0	0.0	0.0	0.0	0.0	0.0	0.0	0.0	0.0	0.0
ACACA	31	symbol	H. sapiens	31	H. sapiens	ACACA	acetyl-CoA carboxylase alpha	GO:2001295 malonyl-CoA biosynthetic process;GO:2001293 malonyl-CoA metabolic process;GO:0071380 cellular response to prostaglandin E stimulus		ENZYME proteins:Ligase; Disease related genes; Potential drug targets; Enzymes; Predicted intracellular proteins	Cytosol (Supported); Additional: Actin filaments;Nucleoli fibrillar center	Biotin		(M5923)HALLMARK PI3K AKT MTOR SIGNALING; (M5924)HALLMARK MTORC1 SIGNALING	1.0	0.0	0.0	0.0	0.0	0.0	0.0	1.0	0.0	0.0	0.0	0.0	0.0	0.0	0.0	0.0	0.0	0.0	0.0	0.0
KLHL11	55175	symbol	H. sapiens	55175	H. sapiens	KLHL11	kelch like family member 11			Predicted intracellular proteins	Nucleoplasm (Approved); Additional: Nuclear membrane				0.0	0.0	0.0	0.0	0.0	0.0	0.0	0.0	0.0	0.0	0.0	0.0	0.0	0.0	0.0	0.0	0.0	0.0	0.0	0.0
NEXN-AS1	374987	symbol	H. sapiens	374987	H. sapiens	NEXN-AS1	NEXN antisense RNA 1								0.0	0.0	0.0	0.0	0.0	0.0	0.0	0.0	0.0	0.0	0.0	0.0	0.0	0.0	0.0	0.0	0.0	0.0	0.0	0.0
ZNF579	163033	symbol	H. sapiens	163033	H. sapiens	ZNF579	zinc finger protein 579	GO:0006357 regulation of transcription by RNA polymerase II;GO:0006355 regulation of transcription, DNA-templated;GO:1903506 regulation of nucleic acid-templated transcription		Predicted intracellular proteins; Transcription factors:Zinc-coordinating DNA-binding domains	Nucleoplasm (Approved)				0.0	0.0	0.0	0.0	0.0	0.0	0.0	0.0	0.0	0.0	0.0	0.0	0.0	0.0	0.0	0.0	0.0	0.0	0.0	0.0
FASN	2194	symbol	H. sapiens	2194	H. sapiens	FASN	fatty acid synthase	GO:0030223 neutrophil differentiation;GO:0090557 establishment of endothelial intestinal barrier;GO:0008611 ether lipid biosynthetic process		FDA approved drug targets:Small molecule drugs; ENZYME proteins:Oxidoreductases; Cancer-related genes:Candidate cancer biomarkers; ENZYME proteins:Hydrolases; ENZYME proteins:Lyases; Enzymes; Predicted intracellular proteins; ENZYME proteins:Transferases	Cytosol;Plasma membrane (Enhanced)	Cerulenin; Orlistat	(M236)PID DELTA NP63 PATHWAY; (M19)PID P73PATHWAY	(M5892)HALLMARK CHOLESTEROL HOMEOSTASIS; (M5935)HALLMARK FATTY ACID METABOLISM; (M5906)HALLMARK ESTROGEN RESPONSE EARLY	1.0	0.0	0.0	0.0	0.0	0.0	0.0	0.0	0.0	1.0	1.0	0.0	0.0	0.0	0.0	0.0	0.0	0.0	0.0	0.0
HIST1H4A	8359	gene_synonym	H. sapiens	8359	H. sapiens	H4C1	H4 clustered histone 1	GO:0045653 negative regulation of megakaryocyte differentiation;GO:0006335 DNA replication-dependent chromatin assembly;GO:0034723 DNA replication-dependent chromatin organization		Predicted intracellular proteins; Disease related genes					1.0	0.0	0.0	0.0	0.0	0.0	0.0	0.0	0.0	0.0	0.0	0.0	0.0	0.0	0.0	0.0	0.0	0.0	0.0	0.0
F2R	2149	symbol	H. sapiens	2149	H. sapiens	F2R	coagulation factor II thrombin receptor	GO:1900134 negative regulation of renin secretion into blood stream;GO:0007529 establishment of synaptic specificity at neuromuscular junction;GO:0099552 trans-synaptic signaling by lipid, modulating synaptic transmission		G-protein coupled receptors:GPCRs excl olfactory receptors; FDA approved drug targets:Small molecule drugs; Predicted intracellular proteins		Streptokinase; SR-123781A; Vorapaxar; Thrombin	(M238)PID THROMBIN PAR1 PATHWAY	(M5902)HALLMARK APOPTOSIS; (M5939)HALLMARK P53 PATHWAY; (M5950)HALLMARK ALLOGRAFT REJECTION	0.0	0.0	0.0	0.0	0.0	0.0	0.0	0.0	1.0	0.0	0.0	0.0	0.0	0.0	1.0	0.0	0.0	0.0	0.0	0.0
ZNF121	7675	symbol	H. sapiens	7675	H. sapiens	ZNF121	zinc finger protein 121	GO:0006357 regulation of transcription by RNA polymerase II;GO:0006355 regulation of transcription, DNA-templated;GO:1903506 regulation of nucleic acid-templated transcription		Predicted intracellular proteins; Transcription factors:Zinc-coordinating DNA-binding domains	Centrosome;Nucleoplasm (Approved); Additional: Nucleoli				0.0	0.0	0.0	0.0	0.0	0.0	0.0	0.0	0.0	0.0	0.0	0.0	0.0	0.0	0.0	0.0	0.0	0.0	0.0	0.0
SLC7A11-AS1	641364	symbol	H. sapiens	641364	H. sapiens	SLC7A11-AS1	SLC7A11 antisense RNA 1								0.0	0.0	0.0	0.0	0.0	0.0	0.0	0.0	0.0	0.0	0.0	0.0	0.0	0.0	0.0	0.0	0.0	0.0	0.0	0.0
SNORA76C	677842	gene_synonym	H. sapiens	677842	H. sapiens	SNORA50C	small nucleolar RNA, H/ACA box 50C	GO:0006396 RNA processing;GO:0016070 RNA metabolic process;GO:0010467 gene expression							0.0	0.0	0.0	0.0	0.0	0.0	0.0	0.0	0.0	0.0	0.0	0.0	0.0	0.0	0.0	0.0	0.0	0.0	0.0	0.0
PLCB1	23236	symbol	H. sapiens	23236	H. sapiens	PLCB1	phospholipase C beta 1	GO:0060466 activation of meiosis involved in egg activation;GO:1905630 response to glyceraldehyde;GO:1905631 cellular response to glyceraldehyde		Human disease related genes:Nervous system diseases:Epilepsy; ENZYME proteins:Hydrolases; Disease related genes; Potential drug targets; Enzymes; Predicted intracellular proteins	Plasma membrane (Approved)		(M252)PID IL8 CXCR1 PATHWAY; (M213)PID AR NONGENOMIC PATHWAY; (M210)PID IL8 CXCR2 PATHWAY	(M5923)HALLMARK PI3K AKT MTOR SIGNALING	1.0	0.0	1.0	0.0	0.0	0.0	0.0	0.0	1.0	0.0	1.0	1.0	0.0	0.0	0.0	1.0	0.0	0.0	0.0	0.0
B3GALT6	126792	symbol	H. sapiens	126792	H. sapiens	B3GALT6	beta-1,3-galactosyltransferase 6	GO:0030206 chondroitin sulfate biosynthetic process;GO:0015012 heparan sulfate proteoglycan biosynthetic process;GO:0050650 chondroitin sulfate proteoglycan biosynthetic process		Human disease related genes:Congenital malformations:Congenital malformations of skin; Human disease related genes:Congenital malformations:Congenital malformations of the musculoskeletal system; Disease related genes; Potential drug targets; Enzymes; Predicted intracellular proteins; ENZYME proteins:Transferases				(M5891)HALLMARK HYPOXIA; (M5937)HALLMARK GLYCOLYSIS	0.0	0.0	0.0	0.0	0.0	0.0	0.0	0.0	0.0	0.0	0.0	0.0	0.0	0.0	0.0	0.0	0.0	0.0	0.0	0.0
GAN	8139	symbol	H. sapiens	8139	H. sapiens	GAN	gigaxonin	GO:0016567 protein ubiquitination;GO:0032446 protein modification by small protein conjugation;GO:0070647 protein modification by small protein conjugation or removal		Predicted intracellular proteins; Human disease related genes:Nervous system diseases:Neurodegenerative diseases; Disease related genes	Microtubules (Supported)				0.0	0.0	0.0	0.0	0.0	0.0	0.0	0.0	0.0	0.0	0.0	0.0	0.0	0.0	0.0	0.0	0.0	0.0	0.0	0.0
CITED4	163732	symbol	H. sapiens	163732	H. sapiens	CITED4	Cbp/p300 interacting transactivator with Glu/Asp rich carboxy-terminal domain 4	GO:0043627 response to estrogen;GO:0009725 response to hormone;GO:0009719 response to endogenous stimulus		Predicted intracellular proteins	Vesicles (Approved)				0.0	0.0	0.0	0.0	0.0	0.0	0.0	0.0	0.0	0.0	0.0	0.0	0.0	0.0	0.0	0.0	0.0	0.0	0.0	0.0
BID	637	symbol	H. sapiens	637	H. sapiens	BID	BH3 interacting domain death agonist	GO:2000271 positive regulation of fibroblast apoptotic process;GO:0010918 positive regulation of mitochondrial membrane potential;GO:0097345 mitochondrial outer membrane permeabilization		Predicted intracellular proteins	Cytosol (Supported)		(M13096)SA PROGRAMMED CELL DEATH; (M84)PID ATM PATHWAY; (M197)PID HIV NEF PATHWAY	(M5941)HALLMARK UV RESPONSE UP; (M5902)HALLMARK APOPTOSIS	0.0	1.0	0.0	0.0	0.0	1.0	0.0	0.0	1.0	0.0	0.0	0.0	0.0	0.0	0.0	0.0	0.0	0.0	1.0	1.0
SLC25A33	84275	symbol	H. sapiens	84275	H. sapiens	SLC25A33	solute carrier family 25 member 33	GO:0006864 pyrimidine nucleotide transport;GO:1990519 pyrimidine nucleotide import into mitochondrion;GO:0031930 mitochondria-nucleus signaling pathway		Transporters:Electrochemical Potential-driven transporters					1.0	0.0	0.0	0.0	0.0	1.0	0.0	0.0	0.0	0.0	0.0	0.0	0.0	0.0	0.0	0.0	0.0	0.0	1.0	0.0
SNORA45A	619562	gene_synonym	H. sapiens	619562	H. sapiens	SNORA3A	small nucleolar RNA, H/ACA box 3A	GO:0006396 RNA processing;GO:0016070 RNA metabolic process;GO:0010467 gene expression							0.0	0.0	0.0	0.0	0.0	0.0	0.0	0.0	0.0	0.0	0.0	0.0	0.0	0.0	0.0	0.0	0.0	0.0	0.0	0.0
LUC7L2	51631	symbol	H. sapiens	51631	H. sapiens	LUC7L2	LUC7 like 2, pre-mRNA splicing factor	GO:0006376 mRNA splice site selection;GO:0000245 spliceosomal complex assembly;GO:0022618 ribonucleoprotein complex assembly		Predicted intracellular proteins	Nucleoplasm (Approved)				0.0	0.0	0.0	0.0	0.0	0.0	0.0	1.0	0.0	0.0	0.0	0.0	0.0	0.0	0.0	0.0	0.0	0.0	0.0	0.0
TSPAN7	7102	symbol	H. sapiens	7102	H. sapiens	TSPAN7	tetraspanin 7			Human disease related genes:Other diseases:Mental and behavioural disorders; CD markers; Transporters:Accessory Factors Involved in Transport; Disease related genes; Potential drug targets				(M5953)HALLMARK KRAS SIGNALING UP	0.0	0.0	1.0	0.0	0.0	0.0	0.0	0.0	0.0	0.0	0.0	1.0	0.0	0.0	0.0	0.0	0.0	0.0	0.0	0.0
NPTX1	4884	symbol	H. sapiens	4884	H. sapiens	NPTX1	neuronal pentraxin 1	GO:0099633 protein localization to postsynaptic specialization membrane;GO:0099645 neurotransmitter receptor localization to postsynaptic specialization membrane;GO:0060385 axonogenesis involved in innervation		Predicted secreted proteins; Transporters:Transporter channels and pores					0.0	0.0	0.0	0.0	0.0	0.0	0.0	0.0	0.0	0.0	0.0	0.0	0.0	0.0	0.0	0.0	0.0	1.0	1.0	0.0
ZNF70	7621	symbol	H. sapiens	7621	H. sapiens	ZNF70	zinc finger protein 70	GO:0006357 regulation of transcription by RNA polymerase II;GO:0006355 regulation of transcription, DNA-templated;GO:1903506 regulation of nucleic acid-templated transcription		Predicted intracellular proteins; Transcription factors:Zinc-coordinating DNA-binding domains	Cytosol (Approved)				0.0	0.0	0.0	0.0	0.0	0.0	0.0	0.0	0.0	0.0	0.0	0.0	0.0	0.0	0.0	0.0	0.0	0.0	0.0	0.0
SNORD33	26818	symbol	H. sapiens	26818	H. sapiens	SNORD33	small nucleolar RNA, C/D box 33	GO:0006396 RNA processing;GO:0016070 RNA metabolic process;GO:0010467 gene expression							0.0	0.0	0.0	0.0	0.0	0.0	0.0	0.0	0.0	0.0	0.0	0.0	0.0	0.0	0.0	0.0	0.0	0.0	0.0	0.0
HIST2H2AB	317772	gene_synonym	H. sapiens	317772	H. sapiens	H2AC21	H2A clustered histone 21	GO:0008150 biological_process		Predicted intracellular proteins	Nucleoplasm (Supported)				1.0	1.0	0.0	0.0	0.0	0.0	0.0	0.0	0.0	0.0	0.0	0.0	0.0	0.0	0.0	0.0	0.0	0.0	0.0	0.0
LOC389906	389906	Gene_ID	H. sapiens	389906	H. sapiens	LOC389906	zinc finger protein 839 pseudogene								0.0	0.0	0.0	0.0	0.0	0.0	0.0	0.0	0.0	0.0	0.0	0.0	0.0	0.0	0.0	0.0	0.0	0.0	0.0	0.0
LRRC75A	388341	symbol	H. sapiens	388341	H. sapiens	LRRC75A	leucine rich repeat containing 75A			Predicted intracellular proteins	Nucleoplasm (Approved); Additional: Cytosol;Nucleoli				0.0	0.0	0.0	0.0	0.0	0.0	0.0	0.0	0.0	0.0	0.0	0.0	0.0	0.0	0.0	0.0	0.0	0.0	0.0	0.0
RAB43	339122	symbol	H. sapiens	339122	H. sapiens	RAB43	RAB43, member RAS oncogene family	GO:0035526 retrograde transport, plasma membrane to Golgi;GO:0090382 phagosome maturation;GO:0019068 virion assembly		Predicted intracellular proteins	Plasma membrane (Supported)				0.0	0.0	0.0	0.0	0.0	0.0	0.0	0.0	0.0	0.0	0.0	0.0	0.0	0.0	0.0	0.0	0.0	0.0	0.0	0.0
RPL39	6170	symbol	H. sapiens	6170	H. sapiens	RPL39	ribosomal protein L39	GO:0002227 innate immune response in mucosa;GO:0002385 mucosal immune response;GO:0002251 organ or tissue specific immune response		Ribosomal proteins; Predicted intracellular proteins				(M5950)HALLMARK ALLOGRAFT REJECTION	1.0	0.0	0.0	0.0	0.0	0.0	0.0	1.0	0.0	0.0	0.0	0.0	0.0	0.0	0.0	0.0	0.0	0.0	0.0	0.0
UGCG	7357	symbol	H. sapiens	7357	H. sapiens	UGCG	UDP-glucose ceramide glucosyltransferase	GO:0006679 glucosylceramide biosynthetic process;GO:1903575 cornified envelope assembly;GO:0006678 glucosylceramide metabolic process		Enzymes; Transporters; FDA approved drug targets:Small molecule drugs; ENZYME proteins:Transferases		Miglustat; Eliglustat	(M143)PID IL2 PI3K PATHWAY	(M5906)HALLMARK ESTROGEN RESPONSE EARLY	0.0	0.0	0.0	0.0	0.0	0.0	0.0	1.0	0.0	0.0	0.0	0.0	0.0	0.0	0.0	0.0	0.0	0.0	0.0	0.0
MGAT5	4249	symbol	H. sapiens	4249	H. sapiens	MGAT5	alpha-1,6-mannosylglycoprotein 6-beta-N-acetylglucosaminyltransferase	GO:1903614 negative regulation of protein tyrosine phosphatase activity;GO:1903613 regulation of protein tyrosine phosphatase activity;GO:0018279 protein N-linked glycosylation via asparagine		Enzymes; ENZYME proteins:Transferases					0.0	0.0	0.0	0.0	0.0	0.0	0.0	0.0	0.0	0.0	0.0	0.0	0.0	0.0	0.0	0.0	0.0	0.0	0.0	0.0
RPP21	79897	symbol	H. sapiens	79897	H. sapiens	RPP21	ribonuclease P/MRP subunit p21	GO:0001682 tRNA 5'-leader removal;GO:0099116 tRNA 5'-end processing;GO:0034471 ncRNA 5'-end processing		Enzymes; ENZYME proteins:Hydrolases; Predicted intracellular proteins					0.0	0.0	0.0	0.0	0.0	0.0	0.0	1.0	0.0	0.0	0.0	0.0	0.0	0.0	0.0	0.0	0.0	0.0	0.0	0.0
SCUBE3	222663	symbol	H. sapiens	222663	H. sapiens	SCUBE3	signal peptide, CUB domain and EGF like domain containing 3	GO:0030513 positive regulation of BMP signaling pathway;GO:0045669 positive regulation of osteoblast differentiation;GO:0030510 regulation of BMP signaling pathway		Predicted secreted proteins	Plasma membrane (Approved)		(M5883)NABA SECRETED FACTORS; (M5885)NABA MATRISOME ASSOCIATED; (M5889)NABA MATRISOME		0.0	0.0	0.0	0.0	0.0	0.0	0.0	0.0	0.0	0.0	0.0	0.0	0.0	1.0	0.0	0.0	0.0	0.0	0.0	0.0
ADCY4	196883	symbol	H. sapiens	196883	H. sapiens	ADCY4	adenylate cyclase 4	GO:0006171 cAMP biosynthetic process;GO:0009190 cyclic nucleotide biosynthetic process;GO:0046058 cAMP metabolic process		Enzymes; ENZYME proteins:Lyases; Predicted intracellular proteins			(M56)PID LPA4 PATHWAY; (M8)PID ENDOTHELIN PATHWAY; (M15)PID LYSOPHOSPHOLIPID PATHWAY		1.0	0.0	0.0	0.0	0.0	1.0	0.0	0.0	1.0	0.0	0.0	1.0	0.0	0.0	0.0	0.0	0.0	0.0	0.0	0.0
HIST1H2BM	8342	gene_synonym	H. sapiens	8342	H. sapiens	H2BC14	H2B clustered histone 14	GO:0006334 nucleosome assembly;GO:0031497 chromatin assembly;GO:0034728 nucleosome organization		Predicted intracellular proteins	Nucleoplasm (Approved); Additional: Cytosol				1.0	1.0	0.0	1.0	0.0	0.0	0.0	1.0	0.0	0.0	0.0	0.0	0.0	0.0	0.0	0.0	0.0	0.0	0.0	0.0
AFAP1-AS1	84740	symbol	H. sapiens	84740	H. sapiens	AFAP1-AS1	AFAP1 antisense RNA 1								0.0	0.0	0.0	0.0	0.0	0.0	0.0	0.0	0.0	0.0	0.0	0.0	0.0	0.0	0.0	0.0	0.0	0.0	0.0	0.0
AHCTF1P1	285116	symbol	H. sapiens	285116	H. sapiens	AHCTF1P1	AT-hook containing transcription factor 1 pseudogene 1								0.0	0.0	0.0	0.0	0.0	0.0	0.0	0.0	0.0	0.0	0.0	0.0	0.0	0.0	0.0	0.0	0.0	0.0	0.0	0.0
DFFA	1676	symbol	H. sapiens	1676	H. sapiens	DFFA	DNA fragmentation factor subunit alpha	GO:0032076 negative regulation of deoxyribonuclease activity;GO:1902511 negative regulation of apoptotic DNA fragmentation;GO:1903625 negative regulation of DNA catabolic process		Predicted intracellular proteins	Cytosol;Plasma membrane (Supported)		(M7997)SA CASPASE CASCADE; (M197)PID HIV NEF PATHWAY; (M220)PID CASPASE PATHWAY	(M5902)HALLMARK APOPTOSIS	0.0	0.0	0.0	0.0	1.0	0.0	0.0	0.0	0.0	0.0	0.0	0.0	0.0	0.0	0.0	0.0	0.0	0.0	0.0	0.0
PKI55	150967	gene_synonym	H. sapiens	150967	H. sapiens	LINC01963	long intergenic non-protein coding RNA 1963								0.0	0.0	0.0	0.0	0.0	0.0	0.0	0.0	0.0	0.0	0.0	0.0	0.0	0.0	0.0	0.0	0.0	0.0	0.0	0.0
TMEM184A	202915	symbol	H. sapiens	202915	H. sapiens	TMEM184A	transmembrane protein 184A	GO:0006810 transport;GO:0051234 establishment of localization;GO:0051179 localization		Transporters:Electrochemical Potential-driven transporters	Nucleoplasm (Uncertain)				0.0	0.0	0.0	0.0	0.0	0.0	0.0	0.0	0.0	0.0	0.0	0.0	0.0	0.0	0.0	0.0	0.0	0.0	0.0	0.0
EDN2	1907	symbol	H. sapiens	1907	H. sapiens	EDN2	endothelin 2	GO:0003058 hormonal regulation of the force of heart contraction;GO:0009932 cell tip growth;GO:0003099 positive regulation of the force of heart contraction by chemical signal		Predicted secreted proteins	Cytosol (Approved)		(M8)PID ENDOTHELIN PATHWAY; (M145)PID P53 DOWNSTREAM PATHWAY	(M5891)HALLMARK HYPOXIA; (M5956)HALLMARK KRAS SIGNALING DN	0.0	0.0	0.0	0.0	0.0	0.0	0.0	0.0	0.0	0.0	0.0	0.0	0.0	0.0	0.0	0.0	0.0	0.0	0.0	0.0
NNAT	4826	symbol	H. sapiens	4826	H. sapiens	NNAT	neuronatin	GO:0009249 protein lipoylation;GO:0032024 positive regulation of insulin secretion;GO:0090277 positive regulation of peptide hormone secretion							0.0	0.0	0.0	0.0	1.0	0.0	0.0	0.0	0.0	0.0	0.0	0.0	0.0	0.0	0.0	1.0	0.0	0.0	0.0	0.0
SLC7A11	23657	symbol	H. sapiens	23657	H. sapiens	SLC7A11	solute carrier family 7 member 11	GO:1901494 regulation of cysteine metabolic process;GO:0031335 regulation of sulfur amino acid metabolic process;GO:1903786 regulation of glutathione biosynthetic process		Transporters:Electrochemical Potential-driven transporters; FDA approved drug targets:Small molecule drugs	Vesicles (Approved)	Cystine; Glutamic acid; Riluzole; Sulfasalazine; Acetylcysteine; Thimerosal		(M5924)HALLMARK MTORC1 SIGNALING; (M5939)HALLMARK P53 PATHWAY; (M5945)HALLMARK HEME METABOLISM	0.0	0.0	0.0	0.0	0.0	0.0	1.0	1.0	0.0	0.0	0.0	0.0	0.0	1.0	1.0	1.0	1.0	1.0	0.0	0.0
GRB14	2888	symbol	H. sapiens	2888	H. sapiens	GRB14	growth factor receptor bound protein 14	GO:0046627 negative regulation of insulin receptor signaling pathway;GO:1900077 negative regulation of cellular response to insulin stimulus;GO:0008286 insulin receptor signaling pathway		Predicted intracellular proteins	Cytosol;Nucleoplasm (Approved)		(M16)PID INSULIN PATHWAY; (M92)PID ANGIOPOIETIN RECEPTOR PATHWAY		0.0	0.0	0.0	0.0	0.0	0.0	0.0	0.0	0.0	0.0	0.0	0.0	0.0	0.0	0.0	0.0	0.0	0.0	0.0	0.0
RNF138P1	379013	symbol	H. sapiens	379013	H. sapiens	RNF138P1	ring finger protein 138 pseudogene 1								0.0	0.0	0.0	0.0	0.0	0.0	0.0	0.0	0.0	0.0	0.0	0.0	0.0	0.0	0.0	0.0	0.0	0.0	0.0	0.0
CYP20A1	57404	symbol	H. sapiens	57404	H. sapiens	CYP20A1	cytochrome P450 family 20 subfamily A member 1			Predicted intracellular proteins	Actin filaments;Cell Junctions;Plasma membrane (Uncertain); Additional: Nucleoplasm				0.0	0.0	0.0	0.0	0.0	0.0	0.0	0.0	0.0	0.0	0.0	0.0	0.0	0.0	0.0	0.0	0.0	0.0	0.0	0.0
TBC1D24	57465	symbol	H. sapiens	57465	H. sapiens	TBC1D24	TBC1 domain family member 24	GO:0036475 neuron death in response to oxidative stress;GO:0036473 cell death in response to oxidative stress;GO:0070997 neuron death		Human disease related genes:Nervous system diseases:Epilepsy; Human disease related genes:Nervous system diseases:Ear disease; Human disease related genes:Congenital malformations:Other congenital malformations; Disease related genes; Predicted intracellular proteins	Cell Junctions;Plasma membrane (Supported)				0.0	0.0	0.0	0.0	0.0	0.0	0.0	0.0	0.0	0.0	0.0	0.0	0.0	0.0	0.0	0.0	0.0	0.0	0.0	0.0
C19orf60	55049	gene_synonym	H. sapiens	55049	H. sapiens	REX1BD	required for excision 1-B domain containing			Predicted intracellular proteins	Vesicles (Approved)				0.0	0.0	0.0	0.0	0.0	0.0	0.0	0.0	0.0	0.0	0.0	0.0	0.0	0.0	0.0	0.0	0.0	0.0	0.0	0.0
TMEM14E	645843	gene_synonym	H. sapiens	645843	H. sapiens	TMEM14EP	transmembrane protein 14E, pseudogene	GO:0070453 regulation of heme biosynthetic process;GO:1901463 regulation of tetrapyrrole biosynthetic process;GO:1901401 regulation of tetrapyrrole metabolic process							0.0	0.0	0.0	0.0	0.0	0.0	0.0	0.0	0.0	0.0	0.0	0.0	0.0	0.0	0.0	0.0	0.0	0.0	0.0	0.0
TOR1AIP2	163590	symbol	H. sapiens	163590	H. sapiens	TOR1AIP2	torsin 1A interacting protein 2	GO:0090435 protein localization to nuclear envelope;GO:0032781 positive regulation of ATP-dependent activity;GO:0043462 regulation of ATP-dependent activity		Predicted intracellular proteins	Endoplasmic reticulum (Enhanced)			(M5953)HALLMARK KRAS SIGNALING UP	0.0	0.0	0.0	0.0	0.0	0.0	0.0	0.0	0.0	0.0	0.0	0.0	0.0	0.0	0.0	0.0	0.0	0.0	0.0	0.0
C9orf131	138724	symbol	H. sapiens	138724	H. sapiens	C9orf131	chromosome 9 open reading frame 131			Predicted intracellular proteins	Mitochondria (Approved)				0.0	0.0	0.0	0.0	0.0	0.0	0.0	0.0	0.0	0.0	0.0	0.0	0.0	0.0	0.0	0.0	0.0	0.0	0.0	0.0
MANEAL	149175	symbol	H. sapiens	149175	H. sapiens	MANEAL	mannosidase endo-alpha like			Predicted intracellular proteins	Golgi apparatus (Approved)				0.0	0.0	0.0	0.0	0.0	0.0	0.0	0.0	0.0	0.0	0.0	0.0	0.0	0.0	0.0	0.0	0.0	0.0	0.0	0.0
GCLC	2729	symbol	H. sapiens	2729	H. sapiens	GCLC	glutamate-cysteine ligase catalytic subunit	GO:0097069 cellular response to thyroxine stimulus;GO:1904387 cellular response to L-phenylalanine derivative;GO:2000490 negative regulation of hepatic stellate cell activation		ENZYME proteins:Ligase; Human disease related genes:Cardiovascular diseases:Hematologic diseases; Human disease related genes:Congenital disorders of metabolism:Congenital disorders of amino acid metabolism; Disease related genes; Potential drug targets; Enzymes; Predicted intracellular proteins	Nucleoplasm (Approved); Additional: Cytosol;Nucleoli	Glutamic acid; Cysteine		(M5938)HALLMARK REACTIVE OXYGEN SPECIES PATHWAY; (M5924)HALLMARK MTORC1 SIGNALING; (M5934)HALLMARK XENOBIOTIC METABOLISM	0.0	0.0	0.0	0.0	0.0	0.0	0.0	1.0	0.0	0.0	1.0	0.0	0.0	0.0	1.0	0.0	1.0	0.0	1.0	0.0
MVD	4597	symbol	H. sapiens	4597	H. sapiens	MVD	mevalonate diphosphate decarboxylase	GO:0019287 isopentenyl diphosphate biosynthetic process, mevalonate pathway;GO:0009240 isopentenyl diphosphate biosynthetic process;GO:0046490 isopentenyl diphosphate metabolic process		Human disease related genes:Congenital malformations:Congenital malformations of skin; ENZYME proteins:Lyases; Disease related genes; Potential drug targets; Enzymes; Predicted intracellular proteins	Cytosol (Approved); Additional: Cell Junctions			(M5892)HALLMARK CHOLESTEROL HOMEOSTASIS; (M5915)HALLMARK APICAL JUNCTION	0.0	0.0	0.0	0.0	0.0	0.0	0.0	1.0	0.0	0.0	0.0	0.0	0.0	0.0	0.0	0.0	0.0	0.0	0.0	0.0
SPSB4	92369	symbol	H. sapiens	92369	H. sapiens	SPSB4	splA/ryanodine receptor domain and SOCS box containing 4	GO:1902916 positive regulation of protein polyubiquitination;GO:1902914 regulation of protein polyubiquitination;GO:0042752 regulation of circadian rhythm		Predicted intracellular proteins	Golgi apparatus;Nucleoplasm (Approved)				0.0	0.0	0.0	0.0	0.0	0.0	0.0	0.0	0.0	0.0	0.0	0.0	0.0	0.0	0.0	0.0	0.0	0.0	0.0	0.0
TNRC6B	23112	symbol	H. sapiens	23112	H. sapiens	TNRC6B	trinucleotide repeat containing adaptor 6B	GO:1905616 regulation of miRNA-mediated gene silencing by inhibition of translation;GO:1905618 positive regulation of miRNA-mediated gene silencing by inhibition of translation;GO:0060213 positive regulation of nuclear-transcribed mRNA poly(A) tail shortening		Predicted intracellular proteins				(M5945)HALLMARK HEME METABOLISM	1.0	0.0	0.0	0.0	0.0	1.0	0.0	0.0	0.0	0.0	1.0	0.0	1.0	0.0	0.0	0.0	0.0	0.0	0.0	0.0
CTU1	90353	symbol	H. sapiens	90353	H. sapiens	CTU1	cytosolic thiouridylase subunit 1	GO:0002143 tRNA wobble position uridine thiolation;GO:0032447 protein urmylation;GO:0034227 tRNA thio-modification		Predicted intracellular proteins					0.0	0.0	0.0	0.0	0.0	0.0	0.0	0.0	0.0	0.0	0.0	0.0	0.0	0.0	0.0	0.0	0.0	0.0	0.0	0.0
SNORA40	677822	symbol	H. sapiens	677822	H. sapiens	SNORA40	small nucleolar RNA, H/ACA box 40	GO:0006396 RNA processing;GO:0016070 RNA metabolic process;GO:0010467 gene expression							0.0	0.0	0.0	0.0	0.0	0.0	0.0	0.0	0.0	0.0	0.0	0.0	0.0	0.0	0.0	0.0	0.0	0.0	0.0	0.0
TSPEAR-AS1	54082	symbol	H. sapiens	54082	H. sapiens	TSPEAR-AS1	TSPEAR antisense RNA 1								0.0	0.0	0.0	0.0	0.0	0.0	0.0	0.0	0.0	0.0	0.0	0.0	0.0	0.0	0.0	0.0	0.0	0.0	0.0	0.0
TRAPPC2	6399	symbol	H. sapiens	6399	H. sapiens	TRAPPC2	trafficking protein particle complex subunit 2	GO:0006888 endoplasmic reticulum to Golgi vesicle-mediated transport;GO:0048193 Golgi vesicle transport;GO:0001501 skeletal system development		Human disease related genes:Congenital malformations:Congenital malformations of the musculoskeletal system; Predicted intracellular proteins; Disease related genes	Endoplasmic reticulum;Vesicles (Approved); Additional: Nucleoplasm				0.0	0.0	0.0	0.0	0.0	0.0	0.0	0.0	0.0	0.0	0.0	0.0	0.0	0.0	0.0	0.0	0.0	0.0	0.0	0.0
SNORD32A	26819	symbol	H. sapiens	26819	H. sapiens	SNORD32A	small nucleolar RNA, C/D box 32A	GO:0006396 RNA processing;GO:0016070 RNA metabolic process;GO:0010467 gene expression							0.0	0.0	0.0	0.0	0.0	0.0	0.0	0.0	0.0	0.0	0.0	0.0	0.0	0.0	0.0	0.0	0.0	0.0	0.0	0.0
NETO2	81831	symbol	H. sapiens	81831	H. sapiens	NETO2	neuropilin and tolloid like 2	GO:2000312 regulation of kainate selective glutamate receptor activity;GO:2000649 regulation of sodium ion transmembrane transporter activity;GO:0099601 regulation of neurotransmitter receptor activity		Transporters:Accessory Factors Involved in Transport	Golgi apparatus (Approved)				0.0	0.0	0.0	0.0	0.0	0.0	0.0	0.0	0.0	0.0	0.0	0.0	0.0	0.0	0.0	0.0	0.0	0.0	0.0	0.0
NF2	4771	symbol	H. sapiens	4771	H. sapiens	NF2	NF2, moesin-ezrin-radixin like (MERLIN) tumor suppressor	GO:0014010 Schwann cell proliferation;GO:0014009 glial cell proliferation;GO:0042532 negative regulation of tyrosine phosphorylation of STAT protein		Human disease related genes:Cancers:Cancers of eye, brain, and central nervous system; Human disease related genes:Congenital malformations:Other congenital malformations; Disease related genes; Human disease related genes:Cancers:Cancers of the lung and pleura; Predicted intracellular proteins; Cancer-related genes	Plasma membrane (Enhanced); Additional: Cytosol;Nucleoplasm		(M175)PID ERBB2 ERBB3 PATHWAY	(M5951)HALLMARK SPERMATOGENESIS; (M5915)HALLMARK APICAL JUNCTION	1.0	0.0	0.0	0.0	0.0	0.0	1.0	0.0	0.0	1.0	0.0	0.0	0.0	0.0	0.0	1.0	0.0	0.0	0.0	0.0
KISS1	3814	symbol	H. sapiens	3814	H. sapiens	KISS1	KiSS-1 metastasis suppressor	GO:0060112 generation of ovulation cycle rhythm;GO:0033686 positive regulation of luteinizing hormone secretion;GO:0033684 regulation of luteinizing hormone secretion		Human disease related genes:Endocrine and metabolic diseases:Hypothalamus and pituitary gland diseases; Predicted secreted proteins; Disease related genes; Cancer-related genes:Candidate cancer biomarkers	Vesicles (Approved)				0.0	0.0	0.0	0.0	0.0	0.0	0.0	0.0	0.0	0.0	0.0	0.0	1.0	0.0	0.0	0.0	0.0	0.0	0.0	0.0
SERINC5	256987	symbol	H. sapiens	256987	H. sapiens	SERINC5	serine incorporator 5	GO:1904217 regulation of CDP-diacylglycerol-serine O-phosphatidyltransferase activity;GO:1904219 positive regulation of CDP-diacylglycerol-serine O-phosphatidyltransferase activity;GO:1904222 positive regulation of serine C-palmitoyltransferase activity		Transporters	Cytosol;Plasma membrane (Supported); Additional: Centrosome;Vesicles				0.0	0.0	0.0	0.0	0.0	0.0	0.0	1.0	0.0	0.0	0.0	0.0	0.0	0.0	0.0	0.0	1.0	0.0	0.0	0.0
RPS23	6228	symbol	H. sapiens	6228	H. sapiens	RPS23	ribosomal protein S23	GO:1990145 maintenance of translational fidelity;GO:0034063 stress granule assembly;GO:0002181 cytoplasmic translation		Ribosomal proteins; Predicted intracellular proteins; Disease related genes	Cytosol;Endoplasmic reticulum (Enhanced)				1.0	0.0	0.0	0.0	0.0	0.0	0.0	1.0	0.0	0.0	0.0	0.0	0.0	0.0	0.0	0.0	0.0	0.0	0.0	0.0
HIST1H2BB	3018	gene_synonym	H. sapiens	3018	H. sapiens	H2BC3	H2B clustered histone 3	GO:0006334 nucleosome assembly;GO:0031497 chromatin assembly;GO:0034728 nucleosome organization		Predicted intracellular proteins	Nucleoplasm (Approved); Additional: Cytosol			(M5953)HALLMARK KRAS SIGNALING UP	1.0	1.0	0.0	1.0	0.0	0.0	0.0	0.0	0.0	0.0	0.0	0.0	0.0	0.0	0.0	0.0	0.0	0.0	0.0	0.0
MSX2	4488	symbol	H. sapiens	4488	H. sapiens	MSX2	msh homeobox 2	GO:0060364 frontal suture morphogenesis;GO:2001055 positive regulation of mesenchymal cell apoptotic process;GO:0035880 embryonic nail plate morphogenesis		Transcription factors:Helix-turn-helix domains; Human disease related genes:Congenital malformations:Congenital malformations of the musculoskeletal system; Human disease related genes:Congenital malformations:Other congenital malformations; Disease related genes; Predicted intracellular proteins	Nuclear speckles (Supported)				1.0	0.0	0.0	0.0	0.0	0.0	1.0	0.0	0.0	1.0	0.0	0.0	1.0	1.0	0.0	0.0	0.0	0.0	0.0	0.0
CASS4	57091	symbol	H. sapiens	57091	H. sapiens	CASS4	Cas scaffold protein family member 4	GO:0090527 actin filament reorganization;GO:1900026 positive regulation of substrate adhesion-dependent cell spreading;GO:0061098 positive regulation of protein tyrosine kinase activity		Predicted intracellular proteins					0.0	0.0	0.0	0.0	0.0	0.0	0.0	0.0	0.0	0.0	0.0	0.0	0.0	0.0	0.0	0.0	0.0	0.0	0.0	0.0
STAG3L3	442578	symbol	H. sapiens	442578	H. sapiens	STAG3L3	stromal antigen 3-like 3 (pseudogene)	GO:0007062 sister chromatid cohesion;GO:0000819 sister chromatid segregation;GO:0098813 nuclear chromosome segregation							0.0	0.0	0.0	0.0	0.0	0.0	0.0	0.0	0.0	0.0	0.0	0.0	0.0	0.0	0.0	0.0	0.0	0.0	0.0	0.0
GFOD1	54438	symbol	H. sapiens	54438	H. sapiens	GFOD1	glucose-fructose oxidoreductase domain containing 1			Predicted secreted proteins; Predicted intracellular proteins	Cytosol;Nucleoplasm (Approved); Additional: Plasma membrane				1.0	0.0	0.0	0.0	0.0	0.0	0.0	0.0	0.0	0.0	0.0	0.0	0.0	0.0	0.0	0.0	0.0	0.0	0.0	0.0
LOC100131315	100131315	Gene_ID	H. sapiens	100131315	H. sapiens	GREM1-AS1	GREM1 antisense RNA 1								0.0	0.0	0.0	0.0	0.0	0.0	0.0	0.0	0.0	0.0	0.0	0.0	0.0	0.0	0.0	0.0	0.0	0.0	0.0	0.0
ELMSAN1	91748	gene_synonym	H. sapiens	91748	H. sapiens	MIDEAS	mitotic deacetylase associated SANT domain protein	GO:0016575 histone deacetylation;GO:0006476 protein deacetylation;GO:0035601 protein deacylation		Transcription factors:Helix-turn-helix domains; Predicted intracellular proteins	Nucleoplasm (Enhanced)				0.0	0.0	0.0	0.0	0.0	0.0	0.0	0.0	0.0	0.0	0.0	0.0	0.0	0.0	0.0	0.0	0.0	0.0	0.0	0.0
TSPAN14	81619	symbol	H. sapiens	81619	H. sapiens	TSPAN14	tetraspanin 14	GO:0045747 positive regulation of Notch signaling pathway;GO:0008593 regulation of Notch signaling pathway;GO:0072659 protein localization to plasma membrane		Transporters:Accessory Factors Involved in Transport	Vesicles (Supported)				1.0	0.0	0.0	0.0	0.0	0.0	0.0	0.0	0.0	0.0	0.0	0.0	0.0	0.0	0.0	0.0	0.0	0.0	0.0	0.0
LOC100289580	100289580	Gene_ID	H. sapiens	100289580	H. sapiens	LOC100289580	uncharacterized LOC100289580								0.0	0.0	0.0	0.0	0.0	0.0	0.0	0.0	0.0	0.0	0.0	0.0	0.0	0.0	0.0	0.0	0.0	0.0	0.0	0.0
CPA4	51200	symbol	H. sapiens	51200	H. sapiens	CPA4	carboxypeptidase A4	GO:0016573 histone acetylation;GO:0018393 internal peptidyl-lysine acetylation;GO:0006475 internal protein amino acid acetylation		Enzymes; Predicted secreted proteins; Predicted intracellular proteins; Peptidases:Metallopeptidases	Nucleoplasm (Approved); Additional: Centrosome;Cytosol				0.0	0.0	0.0	0.0	1.0	0.0	0.0	0.0	0.0	0.0	0.0	0.0	0.0	0.0	0.0	0.0	0.0	0.0	0.0	0.0
TMEM2	23670	gene_synonym	H. sapiens	23670	H. sapiens	CEMIP2	cell migration inducing hyaluronidase 2	GO:0030214 hyaluronan catabolic process;GO:0030212 hyaluronan metabolic process;GO:0006027 glycosaminoglycan catabolic process		Enzymes; ENZYME proteins:Hydrolases; Predicted intracellular proteins	Plasma membrane (Supported); Additional: Cytosol;Vesicles				0.0	0.0	0.0	0.0	0.0	0.0	0.0	0.0	0.0	0.0	0.0	0.0	0.0	0.0	0.0	0.0	0.0	0.0	0.0	0.0
NSUN5P1	155400	symbol	H. sapiens	155400	H. sapiens	NSUN5P1	NSUN5 pseudogene 1	GO:0070475 rRNA base methylation;GO:0031167 rRNA methylation;GO:0000154 rRNA modification							0.0	0.0	0.0	0.0	0.0	0.0	0.0	0.0	0.0	0.0	0.0	0.0	0.0	0.0	0.0	0.0	0.0	0.0	0.0	0.0
RELL1	768211	symbol	H. sapiens	768211	H. sapiens	RELL1	RELT like 1	GO:1900745 positive regulation of p38MAPK cascade;GO:1900744 regulation of p38MAPK cascade;GO:0032874 positive regulation of stress-activated MAPK cascade			Microtubules;Plasma membrane (Supported)				0.0	0.0	0.0	0.0	0.0	0.0	0.0	0.0	0.0	0.0	0.0	0.0	0.0	0.0	0.0	0.0	0.0	0.0	0.0	0.0
C17orf89	284184	gene_synonym	H. sapiens	284184	H. sapiens	NDUFAF8	NADH:ubiquinone oxidoreductase complex assembly factor 8	GO:0010257 NADH dehydrogenase complex assembly;GO:0032981 mitochondrial respiratory chain complex I assembly;GO:0033108 mitochondrial respiratory chain complex assembly		Predicted intracellular proteins; Disease related genes; Human disease related genes:Congenital disorders of metabolism:Mitochondrial diseases	Mitochondria (Approved)				0.0	0.0	0.0	0.0	0.0	1.0	0.0	0.0	0.0	0.0	0.0	0.0	0.0	0.0	0.0	0.0	0.0	0.0	1.0	0.0
CNTNAP2	26047	symbol	H. sapiens	26047	H. sapiens	CNTNAP2	contactin associated protein 2	GO:0071109 superior temporal gyrus development;GO:0045163 clustering of voltage-gated potassium channels;GO:0071205 protein localization to juxtaparanode region of axon		Human disease related genes:Congenital malformations:Other congenital malformations; Predicted intracellular proteins; Human disease related genes:Other diseases:Mental and behavioural disorders; Disease related genes					0.0	0.0	0.0	0.0	0.0	0.0	0.0	0.0	0.0	0.0	0.0	0.0	0.0	0.0	0.0	1.0	0.0	1.0	0.0	0.0
KLHL26	55295	symbol	H. sapiens	55295	H. sapiens	KLHL26	kelch like family member 26			Predicted intracellular proteins					0.0	0.0	0.0	0.0	0.0	0.0	0.0	0.0	0.0	0.0	0.0	0.0	0.0	0.0	0.0	0.0	0.0	0.0	0.0	0.0
SLC7A5P1	81893	symbol	H. sapiens	81893	H. sapiens	SLC7A5P1	solute carrier family 7 member 5 pseudogene 1	GO:1902475 L-alpha-amino acid transmembrane transport;GO:0015807 L-amino acid transport;GO:0003333 amino acid transmembrane transport							0.0	0.0	0.0	0.0	0.0	0.0	0.0	0.0	0.0	0.0	0.0	0.0	0.0	0.0	0.0	0.0	0.0	0.0	0.0	0.0
ADGRB2	576	symbol	H. sapiens	576	H. sapiens	ADGRB2	adhesion G protein-coupled receptor B2	GO:0033173 calcineurin-NFAT signaling cascade;GO:0097720 calcineurin-mediated signaling;GO:0048016 inositol phosphate-mediated signaling		G-protein coupled receptors:GPCRs excl olfactory receptors; Transporters; Predicted intracellular proteins; G-protein coupled receptors:Family 2 (B) receptors	Plasma membrane (Supported)				0.0	0.0	0.0	0.0	0.0	0.0	0.0	0.0	0.0	0.0	0.0	0.0	0.0	0.0	0.0	0.0	0.0	0.0	0.0	0.0
HDAC4	9759	symbol	H. sapiens	9759	H. sapiens	HDAC4	histone deacetylase 4	GO:0014877 response to muscle inactivity involved in regulation of muscle adaptation;GO:0014894 response to denervation involved in regulation of muscle adaptation;GO:0034983 peptidyl-lysine deacetylation		FDA approved drug targets:Small molecule drugs; ENZYME proteins:Hydrolases; Disease related genes; Enzymes; Human disease related genes:Other congenital disorders:Chromosomal abnormalities; Predicted intracellular proteins	Nuclear speckles (Supported); Additional: Cytosol;Nucleoplasm	Zinc; Romidepsin; N-hydroxy-5-[(3-phenyl-5,6-dihydroimidazo[1,2-a]pyrazin-7(8H)-yl)carbonyl]thiophene-2-carboxamide; 2,2,2-TRIFLUORO-1-{5-[(3-PHENYL-5,6-DIHYDROIMIDAZO[1,2-A]PYRAZIN-7(8H)-YL)CARBONYL]THIOPHEN-2-YL}ETHANE-1,1-DIOL; Zinc acetate; Zinc chloride; Zinc sulfate, unspecified form	(M140)PID RANBP2 PATHWAY; (M32)PID HDAC CLASSIII PATHWAY; (M30)PID HDAC CLASSII PATHWAY		1.0	0.0	1.0	0.0	1.0	0.0	0.0	0.0	0.0	0.0	0.0	0.0	0.0	0.0	0.0	0.0	0.0	0.0	0.0	0.0
SNORA68	26780	symbol	H. sapiens	26780	H. sapiens	SNORA68	small nucleolar RNA, H/ACA box 68	GO:0006396 RNA processing;GO:0016070 RNA metabolic process;GO:0010467 gene expression							0.0	0.0	0.0	0.0	0.0	0.0	0.0	0.0	0.0	0.0	0.0	0.0	0.0	0.0	0.0	0.0	0.0	0.0	0.0	0.0
FEZF2	55079	symbol	H. sapiens	55079	H. sapiens	FEZF2	FEZ family zinc finger 2	GO:0021797 forebrain anterior/posterior pattern specification;GO:0043696 dedifferentiation;GO:0043697 cell dedifferentiation		Predicted intracellular proteins; Transcription factors:Zinc-coordinating DNA-binding domains					1.0	0.0	0.0	0.0	0.0	0.0	0.0	0.0	0.0	0.0	0.0	0.0	0.0	0.0	0.0	1.0	0.0	0.0	0.0	0.0
FAM96B	51647	gene_synonym	H. sapiens	51647	H. sapiens	CIAO2B	cytosolic iron-sulfur assembly component 2B	GO:0106035 protein maturation by [4Fe-4S] cluster transfer;GO:0097428 protein maturation by iron-sulfur cluster transfer;GO:0016226 iron-sulfur cluster assembly		Predicted intracellular proteins	Cytosol;Nucleoplasm (Supported)				0.0	0.0	0.0	0.0	0.0	0.0	0.0	0.0	0.0	0.0	0.0	0.0	0.0	0.0	0.0	0.0	0.0	0.0	0.0	0.0
LOC644285	644285	Gene_ID	H. sapiens	644285	H. sapiens	LOC644285	uncharacterized LOC644285								0.0	0.0	0.0	0.0	0.0	0.0	0.0	0.0	0.0	0.0	0.0	0.0	0.0	0.0	0.0	0.0	0.0	0.0	0.0	0.0
MTRNR2L2	100462981	symbol	H. sapiens	100462981	H. sapiens	MTRNR2L2	MT-RNR2 like 2 (pseudogene)	GO:1900118 negative regulation of execution phase of apoptosis;GO:1900117 regulation of execution phase of apoptosis;GO:2000272 negative regulation of signaling receptor activity							0.0	0.0	0.0	0.0	0.0	0.0	0.0	0.0	0.0	0.0	0.0	0.0	0.0	0.0	0.0	0.0	0.0	0.0	0.0	0.0
ACY1	95	symbol	H. sapiens	95	H. sapiens	ACY1	aminoacylase 1	GO:0006520 cellular amino acid metabolic process;GO:0019752 carboxylic acid metabolic process;GO:0043436 oxoacid metabolic process		ENZYME proteins:Hydrolases; Peptidases:Metallopeptidases; Human disease related genes:Congenital disorders of metabolism:Congenital disorders of amino acid metabolism; Disease related genes; Potential drug targets; Enzymes; Predicted intracellular proteins		Aspartic acid; Acetylcysteine; Copper			0.0	0.0	0.0	0.0	0.0	0.0	0.0	0.0	0.0	0.0	0.0	0.0	0.0	0.0	0.0	0.0	0.0	0.0	0.0	0.0
HS3ST4	9951	symbol	H. sapiens	9951	H. sapiens	HS3ST4	heparan sulfate-glucosamine 3-sulfotransferase 4	GO:0030201 heparan sulfate proteoglycan metabolic process;GO:0006029 proteoglycan metabolic process;GO:0009100 glycoprotein metabolic process		Enzymes; ENZYME proteins:Transferases					0.0	0.0	0.0	0.0	0.0	0.0	0.0	0.0	0.0	0.0	0.0	0.0	0.0	0.0	0.0	0.0	0.0	0.0	0.0	0.0
TPGS1	91978	symbol	H. sapiens	91978	H. sapiens	TPGS1	tubulin polyglutamylase complex subunit 1	GO:0018095 protein polyglutamylation;GO:0007288 sperm axoneme assembly;GO:0018200 peptidyl-glutamic acid modification		Predicted intracellular proteins					0.0	0.0	0.0	0.0	0.0	0.0	0.0	0.0	0.0	0.0	0.0	0.0	0.0	0.0	0.0	0.0	0.0	0.0	0.0	0.0
GPR162	27239	symbol	H. sapiens	27239	H. sapiens	GPR162	G protein-coupled receptor 162	GO:0007186 G protein-coupled receptor signaling pathway;GO:0007165 signal transduction;GO:0023052 signaling		G-protein coupled receptors:GPCRs excl olfactory receptors; Predicted intracellular proteins	Centriolar satellite (Approved)				0.0	0.0	0.0	0.0	0.0	0.0	0.0	0.0	0.0	0.0	0.0	0.0	0.0	0.0	0.0	0.0	0.0	0.0	0.0	0.0
HBEGF	1839	symbol	H. sapiens	1839	H. sapiens	HBEGF	heparin binding EGF like growth factor	GO:0051543 regulation of elastin biosynthetic process;GO:0051545 negative regulation of elastin biosynthetic process;GO:0035313 wound healing, spreading of epidermal cells		Predicted secreted proteins			(M201)PID ERBB NETWORK PATHWAY; (M13)PID ERBB4 PATHWAY; (M41)PID ER NONGENOMIC PATHWAY	(M5890)HALLMARK TNFA SIGNALING VIA NFKB; (M5909)HALLMARK MYOGENESIS; (M5932)HALLMARK INFLAMMATORY RESPONSE	1.0	0.0	0.0	0.0	0.0	0.0	0.0	1.0	1.0	0.0	0.0	0.0	0.0	0.0	0.0	0.0	0.0	0.0	0.0	0.0
RNU11	26824	symbol	H. sapiens	26824	H. sapiens	RNU11	RNA, U11 small nuclear	GO:0000395 mRNA 5'-splice site recognition;GO:0045292 mRNA cis splicing, via spliceosome;GO:0006376 mRNA splice site selection							0.0	0.0	0.0	0.0	0.0	0.0	0.0	0.0	0.0	0.0	0.0	0.0	0.0	0.0	0.0	0.0	0.0	0.0	0.0	0.0
MGC27345						None	None	None	None	None	None	None	None	None	nan	nan	nan	nan	nan	nan	nan	nan	nan	nan	nan	nan	nan	nan	nan	nan	nan	nan	nan	nan
GNG10	2790	symbol	H. sapiens	2790	H. sapiens	GNG10	G protein subunit gamma 10	GO:0007186 G protein-coupled receptor signaling pathway;GO:0007165 signal transduction;GO:0023052 signaling		RAS pathway related proteins; Predicted intracellular proteins					1.0	0.0	0.0	0.0	0.0	0.0	0.0	0.0	1.0	0.0	1.0	1.0	0.0	0.0	0.0	0.0	0.0	0.0	0.0	0.0
NPEPL1	79716	symbol	H. sapiens	79716	H. sapiens	NPEPL1	aminopeptidase like 1	GO:0006508 proteolysis;GO:0019538 protein metabolic process;GO:1901564 organonitrogen compound metabolic process		Enzymes; Predicted intracellular proteins; Peptidases:Metallopeptidases	Nucleoplasm (Approved); Additional: Cytosol				0.0	0.0	0.0	0.0	0.0	0.0	0.0	0.0	0.0	0.0	0.0	0.0	0.0	0.0	0.0	0.0	0.0	0.0	0.0	0.0
ANKRD36BP1	84832	symbol	H. sapiens	84832	H. sapiens	ANKRD36BP1	ankyrin repeat domain 36B pseudogene 1								0.0	0.0	0.0	0.0	0.0	0.0	0.0	0.0	0.0	0.0	0.0	0.0	0.0	0.0	0.0	0.0	0.0	0.0	0.0	0.0
RPL22	6146	symbol	H. sapiens	6146	H. sapiens	RPL22	ribosomal protein L22	GO:0099577 regulation of translation at presynapse, modulating synaptic transmission;GO:0140244 regulation of translation at presynapse;GO:0099547 regulation of translation at synapse, modulating synaptic transmission		Predicted intracellular proteins; Ribosomal proteins; Cancer-related genes:Mutational cancer driver genes	Nucleoli (Approved); Additional: Nucleoplasm			(M5926)HALLMARK MYC TARGETS V1	1.0	0.0	0.0	0.0	0.0	0.0	0.0	1.0	0.0	0.0	0.0	0.0	0.0	0.0	0.0	0.0	0.0	0.0	0.0	0.0
SH3RF3-AS1	100287216	symbol	H. sapiens	100287216	H. sapiens	SH3RF3-AS1	SH3RF3 antisense RNA 1								0.0	0.0	0.0	0.0	0.0	0.0	0.0	0.0	0.0	0.0	0.0	0.0	0.0	0.0	0.0	0.0	0.0	0.0	0.0	0.0
TET1	80312	symbol	H. sapiens	80312	H. sapiens	TET1	tet methylcytosine dioxygenase 1	GO:0090310 negative regulation of DNA methylation-dependent heterochromatin assembly;GO:0006211 5-methylcytosine catabolic process;GO:0019857 5-methylcytosine metabolic process		ENZYME proteins:Oxidoreductases; Transcription factors:Zinc-coordinating DNA-binding domains; Disease related genes; Potential drug targets; Enzymes; Predicted intracellular proteins; Cancer-related genes	Nucleoplasm (Supported); Additional: Nuclear membrane				1.0	0.0	0.0	0.0	0.0	0.0	0.0	0.0	0.0	0.0	0.0	0.0	0.0	0.0	0.0	0.0	0.0	0.0	0.0	0.0
CDHR5	53841	symbol	H. sapiens	53841	H. sapiens	CDHR5	cadherin related family member 5	GO:0090675 intermicrovillar adhesion;GO:1904970 brush border assembly;GO:0032532 regulation of microvillus length		Predicted intracellular proteins					0.0	0.0	0.0	0.0	0.0	0.0	0.0	0.0	0.0	0.0	0.0	0.0	0.0	0.0	0.0	0.0	0.0	0.0	0.0	0.0
PPA1	5464	symbol	H. sapiens	5464	H. sapiens	PPA1	inorganic pyrophosphatase 1	GO:0006796 phosphate-containing compound metabolic process;GO:0006793 phosphorus metabolic process;GO:0044237 cellular metabolic process		Enzymes; ENZYME proteins:Hydrolases; Predicted intracellular proteins	Vesicles (Supported)			(M5924)HALLMARK MTORC1 SIGNALING	0.0	0.0	0.0	0.0	0.0	0.0	0.0	0.0	0.0	0.0	0.0	0.0	0.0	0.0	0.0	0.0	0.0	0.0	0.0	0.0
SNORD89	692205	symbol	H. sapiens	692205	H. sapiens	SNORD89	small nucleolar RNA, C/D box 89	GO:0006396 RNA processing;GO:0016070 RNA metabolic process;GO:0010467 gene expression							0.0	0.0	0.0	0.0	0.0	0.0	0.0	0.0	0.0	0.0	0.0	0.0	0.0	0.0	0.0	0.0	0.0	0.0	0.0	0.0
UBL4B	164153	symbol	H. sapiens	164153	H. sapiens	UBL4B	ubiquitin like 4B	GO:1903955 positive regulation of protein targeting to mitochondrion;GO:1903749 positive regulation of establishment of protein localization to mitochondrion;GO:1903214 regulation of protein targeting to mitochondrion		Predicted intracellular proteins					0.0	0.0	0.0	0.0	0.0	0.0	0.0	0.0	0.0	0.0	0.0	0.0	0.0	0.0	0.0	0.0	0.0	0.0	0.0	0.0
COX18	285521	symbol	H. sapiens	285521	H. sapiens	COX18	cytochrome c oxidase assembly factor COX18	GO:0032978 protein insertion into membrane from inner side;GO:0032979 protein insertion into mitochondrial inner membrane from matrix;GO:0051204 protein insertion into mitochondrial membrane		Transporters:Electrochemical Potential-driven transporters					1.0	0.0	0.0	0.0	0.0	1.0	0.0	0.0	0.0	0.0	0.0	0.0	0.0	0.0	0.0	0.0	0.0	0.0	1.0	0.0
RNU4ATAC	100151683	symbol	H. sapiens	100151683	H. sapiens	RNU4ATAC	RNA, U4atac small nuclear (U12-dependent splicing)	GO:0000395 mRNA 5'-splice site recognition;GO:0000244 spliceosomal tri-snRNP complex assembly;GO:0045292 mRNA cis splicing, via spliceosome							0.0	0.0	0.0	0.0	0.0	0.0	0.0	0.0	0.0	0.0	0.0	0.0	0.0	0.0	0.0	0.0	0.0	0.0	0.0	0.0
LIN7C	55327	symbol	H. sapiens	55327	H. sapiens	LIN7C	lin-7 homolog C, crumbs cell polarity complex component	GO:1903361 protein localization to basolateral plasma membrane;GO:0035090 maintenance of apical/basal cell polarity;GO:0045199 maintenance of epithelial cell apical/basal polarity		Predicted intracellular proteins					0.0	0.0	0.0	0.0	0.0	0.0	0.0	0.0	0.0	0.0	0.0	1.0	0.0	0.0	0.0	0.0	0.0	0.0	0.0	0.0
ZNF808	388558	symbol	H. sapiens	388558	H. sapiens	ZNF808	zinc finger protein 808	GO:0045944 positive regulation of transcription by RNA polymerase II;GO:0045893 positive regulation of transcription, DNA-templated;GO:1903508 positive regulation of nucleic acid-templated transcription		Predicted intracellular proteins; Transcription factors:Zinc-coordinating DNA-binding domains					0.0	0.0	0.0	0.0	0.0	0.0	0.0	0.0	0.0	0.0	0.0	0.0	0.0	0.0	0.0	0.0	0.0	0.0	0.0	0.0
NOCT	25819	symbol	H. sapiens	25819	H. sapiens	NOCT	nocturnin	GO:0000290 deadenylation-dependent decapping of nuclear-transcribed mRNA;GO:0110156 methylguanosine-cap decapping;GO:0033962 P-body assembly		Predicted intracellular proteins	Nuclear bodies (Supported); Additional: Cytosol;Nucleoplasm			(M5891)HALLMARK HYPOXIA	1.0	0.0	0.0	0.0	0.0	0.0	0.0	0.0	0.0	0.0	1.0	0.0	0.0	1.0	0.0	0.0	0.0	0.0	0.0	0.0
FBXL19	54620	symbol	H. sapiens	54620	H. sapiens	FBXL19	F-box and leucine rich repeat protein 19	GO:0016577 histone demethylation;GO:0006482 protein demethylation;GO:0008214 protein dealkylation		Predicted intracellular proteins	Nucleoplasm (Approved)				0.0	0.0	0.0	0.0	0.0	0.0	0.0	0.0	0.0	0.0	0.0	0.0	0.0	0.0	0.0	0.0	0.0	0.0	0.0	0.0
GOLGA3	2802	symbol	H. sapiens	2802	H. sapiens	GOLGA3	golgin A3	GO:0007283 spermatogenesis;GO:0048232 male gamete generation;GO:0007276 gamete generation		Predicted intracellular proteins	Golgi apparatus (Supported); Additional: Nucleoplasm				1.0	0.0	0.0	0.0	0.0	0.0	0.0	0.0	0.0	0.0	0.0	0.0	0.0	0.0	0.0	0.0	0.0	0.0	0.0	0.0
SNORA22	677807	symbol	H. sapiens	677807	H. sapiens	SNORA22	small nucleolar RNA, H/ACA box 22	GO:0006396 RNA processing;GO:0016070 RNA metabolic process;GO:0010467 gene expression							0.0	0.0	0.0	0.0	0.0	0.0	0.0	0.0	0.0	0.0	0.0	0.0	0.0	0.0	0.0	0.0	0.0	0.0	0.0	0.0
AMFR	267	symbol	H. sapiens	267	H. sapiens	AMFR	autocrine motility factor receptor	GO:2000638 regulation of SREBP signaling pathway;GO:1904380 endoplasmic reticulum mannose trimming;GO:0036507 protein demannosylation		Enzymes; Predicted intracellular proteins; ENZYME proteins:Transferases	Endoplasmic reticulum;Golgi apparatus (Supported)			(M5906)HALLMARK ESTROGEN RESPONSE EARLY; (M5907)HALLMARK ESTROGEN RESPONSE LATE	0.0	0.0	0.0	0.0	0.0	0.0	0.0	0.0	0.0	1.0	0.0	0.0	0.0	0.0	0.0	0.0	0.0	0.0	0.0	0.0
PTCH2	8643	symbol	H. sapiens	8643	H. sapiens	PTCH2	patched 2	GO:0009957 epidermal cell fate specification;GO:0045606 positive regulation of epidermal cell differentiation;GO:0045684 positive regulation of epidermis development		Cancer-related genes:Candidate cancer biomarkers; Human disease related genes:Skin diseases:Skin and soft tissue diseases; Disease related genes; Potential drug targets; Transporters:Electrochemical Potential-driven transporters; Predicted intracellular proteins	Plasma membrane (Supported); Additional: Nucleoli		(M211)PID HEDGEHOG 2PATHWAY		0.0	0.0	0.0	0.0	0.0	0.0	0.0	0.0	1.0	0.0	0.0	0.0	0.0	0.0	0.0	0.0	0.0	0.0	0.0	0.0
GLRX2	51022	symbol	H. sapiens	51022	H. sapiens	GLRX2	glutaredoxin 2	GO:0042262 DNA protection;GO:0051775 response to redox state;GO:0071450 cellular response to oxygen radical		Predicted intracellular proteins	Nucleoplasm (Supported); Additional: Vesicles	Glutathione		(M5938)HALLMARK REACTIVE OXYGEN SPECIES PATHWAY	0.0	0.0	0.0	0.0	0.0	0.0	0.0	1.0	0.0	0.0	0.0	0.0	0.0	0.0	0.0	0.0	1.0	0.0	0.0	0.0
CBWD5	220869	symbol	H. sapiens	220869	H. sapiens	CBWD5	COBW domain containing 5			Predicted intracellular proteins	Plasma membrane (Approved)				0.0	0.0	0.0	0.0	0.0	0.0	0.0	0.0	0.0	0.0	0.0	0.0	0.0	0.0	0.0	0.0	0.0	0.0	0.0	0.0
PPP1R3F	89801	symbol	H. sapiens	89801	H. sapiens	PPP1R3F	protein phosphatase 1 regulatory subunit 3F	GO:2000465 regulation of glycogen (starch) synthase activity;GO:0005979 regulation of glycogen biosynthetic process;GO:0010962 regulation of glucan biosynthetic process		Predicted intracellular proteins	Nucleoplasm;Vesicles (Approved)				0.0	0.0	0.0	0.0	0.0	0.0	0.0	0.0	0.0	0.0	0.0	0.0	0.0	0.0	0.0	0.0	0.0	0.0	0.0	0.0
CPA3	1359	symbol	H. sapiens	1359	H. sapiens	CPA3	carboxypeptidase A3	GO:0002002 regulation of angiotensin levels in blood;GO:0002003 angiotensin maturation;GO:0001991 regulation of systemic arterial blood pressure by circulatory renin-angiotensin		Enzymes; ENZYME proteins:Hydrolases; Predicted secreted proteins; Peptidases:Metallopeptidases	Golgi apparatus (Approved); Additional: Nucleoplasm				0.0	0.0	0.0	0.0	0.0	0.0	0.0	1.0	0.0	0.0	0.0	0.0	0.0	0.0	0.0	0.0	0.0	0.0	0.0	0.0
ZNF543	125919	symbol	H. sapiens	125919	H. sapiens	ZNF543	zinc finger protein 543	GO:0006357 regulation of transcription by RNA polymerase II;GO:0006355 regulation of transcription, DNA-templated;GO:1903506 regulation of nucleic acid-templated transcription		Predicted intracellular proteins; Transcription factors:Zinc-coordinating DNA-binding domains	Nucleoplasm (Approved)				0.0	0.0	0.0	0.0	0.0	0.0	0.0	0.0	0.0	0.0	0.0	0.0	0.0	0.0	0.0	0.0	0.0	0.0	0.0	0.0
NPM3	10360	symbol	H. sapiens	10360	H. sapiens	NPM3	nucleophosmin/nucleoplasmin 3	GO:0009303 rRNA transcription;GO:0098781 ncRNA transcription;GO:0006364 rRNA processing		Predicted intracellular proteins	Actin filaments;Cytosol;Nucleoli (Approved)				1.0	0.0	0.0	0.0	0.0	0.0	0.0	0.0	0.0	0.0	0.0	0.0	0.0	0.0	0.0	0.0	0.0	0.0	0.0	0.0
TIMM17B	10245	symbol	H. sapiens	10245	H. sapiens	TIMM17B	translocase of inner mitochondrial membrane 17B	GO:0030150 protein import into mitochondrial matrix;GO:0044743 protein transmembrane import into intracellular organelle;GO:0065002 intracellular protein transmembrane transport		Predicted intracellular proteins	Microtubules (Approved); Additional: Mitochondria				0.0	0.0	0.0	0.0	0.0	0.0	0.0	0.0	0.0	0.0	0.0	0.0	0.0	0.0	0.0	0.0	0.0	0.0	1.0	0.0
UBTD1	80019	symbol	H. sapiens	80019	H. sapiens	UBTD1	ubiquitin domain containing 1			Predicted intracellular proteins	Vesicles (Approved); Additional: Cytosol;Plasma membrane				0.0	0.0	0.0	0.0	0.0	0.0	0.0	0.0	0.0	0.0	0.0	0.0	0.0	0.0	0.0	0.0	0.0	0.0	0.0	0.0
EMC6	83460	symbol	H. sapiens	83460	H. sapiens	EMC6	ER membrane protein complex subunit 6	GO:0045050 protein insertion into ER membrane by stop-transfer membrane-anchor sequence;GO:0071816 tail-anchored membrane protein insertion into ER membrane;GO:0045048 protein insertion into ER membrane		Transporters:Primary Active Transporters	Centrosome (Approved); Additional: Nucleoplasm				0.0	0.0	0.0	0.0	0.0	0.0	0.0	0.0	0.0	0.0	0.0	0.0	0.0	0.0	0.0	0.0	0.0	0.0	0.0	0.0
APBA1	320	symbol	H. sapiens	320	H. sapiens	APBA1	amyloid beta precursor protein binding family A member 1	GO:0014051 gamma-aminobutyric acid secretion;GO:0014047 glutamate secretion;GO:0015812 gamma-aminobutyric acid transport		Transporters:Accessory Factors Involved in Transport; Predicted intracellular proteins	Golgi apparatus (Supported)				0.0	0.0	0.0	0.0	0.0	0.0	0.0	0.0	0.0	0.0	0.0	1.0	0.0	0.0	0.0	0.0	0.0	0.0	0.0	0.0
TTC5	91875	symbol	H. sapiens	91875	H. sapiens	TTC5	tetratricopeptide repeat domain 5	GO:0061014 positive regulation of mRNA catabolic process;GO:1903313 positive regulation of mRNA metabolic process;GO:0009267 cellular response to starvation		Predicted intracellular proteins	Nucleoplasm (Supported)		(M261)PID P53 REGULATION PATHWAY		0.0	0.0	0.0	0.0	0.0	1.0	0.0	0.0	0.0	0.0	1.0	0.0	1.0	0.0	0.0	0.0	0.0	0.0	0.0	0.0
DUSP8	1850	symbol	H. sapiens	1850	H. sapiens	DUSP8	dual specificity phosphatase 8	GO:0035335 peptidyl-tyrosine dephosphorylation;GO:0043409 negative regulation of MAPK cascade;GO:0006470 protein dephosphorylation		Enzymes; ENZYME proteins:Hydrolases; Predicted intracellular proteins	Cytosol (Approved)		(M76)PID P38 ALPHA BETA PATHWAY; (M166)PID ATF2 PATHWAY		0.0	0.0	0.0	0.0	0.0	0.0	0.0	0.0	0.0	0.0	0.0	0.0	0.0	0.0	0.0	0.0	0.0	0.0	0.0	0.0
AFF3	3899	symbol	H. sapiens	3899	H. sapiens	AFF3	AF4/FMR2 family member 3	GO:0035116 embryonic hindlimb morphogenesis;GO:0035137 hindlimb morphogenesis;GO:0030326 embryonic limb morphogenesis		Predicted intracellular proteins; Cancer-related genes	Nucleoplasm (Supported); Additional: Cytosol				0.0	0.0	0.0	0.0	0.0	0.0	0.0	0.0	0.0	0.0	0.0	0.0	0.0	1.0	0.0	0.0	0.0	0.0	0.0	0.0
C1orf53	388722	symbol	H. sapiens	388722	H. sapiens	C1orf53	chromosome 1 open reading frame 53			Predicted intracellular proteins	Vesicles (Approved); Additional: Aggresome				0.0	0.0	0.0	0.0	0.0	0.0	0.0	0.0	0.0	0.0	0.0	0.0	0.0	0.0	0.0	0.0	0.0	0.0	0.0	0.0
GNL3L	54552	symbol	H. sapiens	54552	H. sapiens	GNL3L	G protein nucleolar 3 like	GO:0033234 negative regulation of protein sumoylation;GO:1904816 positive regulation of protein localization to chromosome, telomeric region;GO:1904814 regulation of protein localization to chromosome, telomeric region		Predicted intracellular proteins	Nucleoli (Supported); Additional: Cytosol;Nucleoplasm				0.0	0.0	0.0	0.0	1.0	0.0	0.0	0.0	0.0	0.0	0.0	0.0	0.0	0.0	0.0	0.0	0.0	0.0	0.0	0.0
LOC389199	389199	Gene_ID	H. sapiens	389199	H. sapiens	LOC389199	uncharacterized LOC389199								0.0	0.0	0.0	0.0	0.0	0.0	0.0	0.0	0.0	0.0	0.0	0.0	0.0	0.0	0.0	0.0	0.0	0.0	0.0	0.0
RC3H1	149041	symbol	H. sapiens	149041	H. sapiens	RC3H1	ring finger and CCCH-type domains 1	GO:0002635 negative regulation of germinal center formation;GO:0061470 T follicular helper cell differentiation;GO:0002634 regulation of germinal center formation		Enzymes; Predicted intracellular proteins; ENZYME proteins:Transferases	Cytosol (Supported); Additional: Golgi apparatus;Plasma membrane				1.0	0.0	0.0	0.0	0.0	0.0	0.0	0.0	0.0	0.0	1.0	0.0	0.0	0.0	0.0	0.0	0.0	0.0	0.0	0.0
RFFL	117584	symbol	H. sapiens	117584	H. sapiens	RFFL	ring finger and FYVE like domain containing E3 ubiquitin protein ligase	GO:2001271 negative regulation of cysteine-type endopeptidase activity involved in execution phase of apoptosis;GO:2001270 regulation of cysteine-type endopeptidase activity involved in execution phase of apoptosis;GO:1900118 negative regulation of execution phase of apoptosis		Enzymes; Predicted intracellular proteins; ENZYME proteins:Transferases	Vesicles (Approved)		(M128)PID TNF PATHWAY		0.0	0.0	0.0	0.0	0.0	1.0	0.0	0.0	0.0	0.0	0.0	0.0	0.0	0.0	0.0	0.0	0.0	0.0	0.0	0.0
SCAND1	51282	symbol	H. sapiens	51282	H. sapiens	SCAND1	SCAN domain containing 1	GO:0045893 positive regulation of transcription, DNA-templated;GO:1903508 positive regulation of nucleic acid-templated transcription;GO:1902680 positive regulation of RNA biosynthetic process		Predicted intracellular proteins	Nuclear speckles (Approved)				0.0	0.0	0.0	0.0	0.0	0.0	0.0	0.0	0.0	0.0	0.0	0.0	0.0	0.0	0.0	0.0	0.0	0.0	0.0	0.0
LYRM4	57128	symbol	H. sapiens	57128	H. sapiens	LYRM4	LYR motif containing 4	GO:0016226 iron-sulfur cluster assembly;GO:0031163 metallo-sulfur cluster assembly;GO:0006790 sulfur compound metabolic process		Predicted intracellular proteins; Disease related genes; Human disease related genes:Congenital disorders of metabolism:Mitochondrial diseases	Nuclear bodies (Supported)				0.0	0.0	0.0	0.0	0.0	0.0	0.0	0.0	0.0	0.0	0.0	0.0	0.0	0.0	0.0	0.0	0.0	0.0	0.0	0.0
C17orf82	388407	gene_synonym	H. sapiens	388407	H. sapiens	LINC02875	long intergenic non-protein coding RNA 2875								0.0	0.0	0.0	0.0	0.0	0.0	0.0	0.0	0.0	0.0	0.0	0.0	0.0	0.0	0.0	0.0	0.0	0.0	0.0	0.0
HELZ	9931	symbol	H. sapiens	9931	H. sapiens	HELZ	helicase with zinc finger	GO:0035194 post-transcriptional gene silencing by RNA;GO:0016441 posttranscriptional gene silencing;GO:0031047 gene silencing by RNA		Predicted intracellular proteins	Nucleoli;Nucleoli rim (Approved); Additional: Actin filaments;Plasma membrane				0.0	0.0	0.0	0.0	0.0	0.0	0.0	0.0	0.0	0.0	0.0	0.0	0.0	0.0	0.0	0.0	0.0	0.0	0.0	0.0
MDM2	4193	symbol	H. sapiens	4193	H. sapiens	MDM2	MDM2 proto-oncogene	GO:0036369 transcription factor catabolic process;GO:0007089 traversing start control point of mitotic cell cycle;GO:0072717 cellular response to actinomycin D		Cancer-related genes:Candidate cancer biomarkers; Human disease related genes:Cancers:Cancers of soft tissues and bone; Human disease related genes:Cancers:Cancers of eye, brain, and central nervous system; Human disease related genes:Cancers:Cancers of male genital organs; Human disease related genes:Cancers:Cancers of the breast and female genital organs; Disease related genes; Potential drug t…	Cytosol;Nucleoplasm (Supported); Additional: Golgi apparatus	Zinc; Cis-[4,5-Bis-(4-Bromophenyl)-2-(2-Ethoxy-4-Methoxyphenyl)-4,5-Dihydroimidazol-1-Yl]-[4-(2-Hydroxyethyl)Piperazin-1-Yl]Methanone; Cis-[4,5-Bis-(4-Chlorophenyl)-2-(2-Isopropoxy-4-Methoxyphenyl)-4,5-Dihyd Roimidazol-1-Yl]-Piperazin-1-Yl-Methanone; Zinc acetate; Zinc chloride; Zinc sulfate, unspecified form	(M140)PID RANBP2 PATHWAY; (M1529)SA G1 AND S PHASES; (M242)PID AURORA A PATHWAY	(M5939)HALLMARK P53 PATHWAY	1.0	1.0	1.0	1.0	1.0	1.0	1.0	0.0	1.0	0.0	1.0	1.0	1.0	0.0	0.0	0.0	0.0	0.0	0.0	0.0
MYRIP	25924	symbol	H. sapiens	25924	H. sapiens	MYRIP	myosin VIIA and Rab interacting protein	GO:0032024 positive regulation of insulin secretion;GO:0090277 positive regulation of peptide hormone secretion;GO:0002793 positive regulation of peptide secretion		Predicted intracellular proteins	Golgi apparatus;Nucleoli fibrillar center;Nucleoplasm (Approved)				0.0	0.0	0.0	0.0	0.0	0.0	0.0	0.0	0.0	0.0	0.0	0.0	0.0	0.0	0.0	0.0	0.0	0.0	0.0	0.0
ARID3A	1820	symbol	H. sapiens	1820	H. sapiens	ARID3A	AT-rich interaction domain 3A	GO:0045944 positive regulation of transcription by RNA polymerase II;GO:0045893 positive regulation of transcription, DNA-templated;GO:1903508 positive regulation of nucleic acid-templated transcription		Transcription factors:Helix-turn-helix domains; Predicted intracellular proteins	Nucleoplasm (Supported); Additional: Cytosol		(M145)PID P53 DOWNSTREAM PATHWAY		0.0	0.0	0.0	0.0	0.0	1.0	0.0	0.0	0.0	0.0	0.0	0.0	0.0	0.0	0.0	0.0	0.0	0.0	0.0	0.0
BEGAIN	57596	symbol	H. sapiens	57596	H. sapiens	BEGAIN	brain enriched guanylate kinase associated	GO:0098962 regulation of postsynaptic neurotransmitter receptor activity;GO:0099601 regulation of neurotransmitter receptor activity;GO:0031644 regulation of nervous system process		Predicted intracellular proteins	Nucleoplasm (Approved); Additional: Cytosol;Golgi apparatus				0.0	0.0	0.0	0.0	0.0	0.0	0.0	0.0	0.0	0.0	0.0	1.0	0.0	0.0	0.0	0.0	0.0	0.0	0.0	0.0
TAX1BP3	30851	symbol	H. sapiens	30851	H. sapiens	TAX1BP3	Tax1 binding protein 3	GO:2000009 negative regulation of protein localization to cell surface;GO:2000008 regulation of protein localization to cell surface;GO:0007266 Rho protein signal transduction		Predicted intracellular proteins	Nucleoli fibrillar center (Approved); Additional: Actin filaments;Vesicles			(M5939)HALLMARK P53 PATHWAY	1.0	0.0	0.0	0.0	0.0	0.0	0.0	0.0	0.0	1.0	0.0	0.0	0.0	0.0	0.0	0.0	0.0	0.0	0.0	0.0
WASH2P	375260	symbol	H. sapiens	375260	H. sapiens	WASH2P	WASP family homolog 2, pseudogene								0.0	0.0	0.0	0.0	0.0	0.0	0.0	0.0	0.0	0.0	0.0	0.0	0.0	0.0	0.0	0.0	0.0	0.0	0.0	0.0
TMEFF1	8577	symbol	H. sapiens	8577	H. sapiens	TMEFF1	transmembrane protein with EGF like and two follistatin like domains 1	GO:0008045 motor neuron axon guidance;GO:0016358 dendrite development;GO:0007411 axon guidance		Transporters:Accessory Factors Involved in Transport					0.0	0.0	0.0	0.0	0.0	0.0	0.0	0.0	0.0	0.0	0.0	0.0	0.0	0.0	0.0	0.0	0.0	0.0	0.0	0.0
DHRS13	147015	symbol	H. sapiens	147015	H. sapiens	DHRS13	dehydrogenase/reductase 13	GO:0042574 retinal metabolic process;GO:0042572 retinol metabolic process;GO:0006081 cellular aldehyde metabolic process		Predicted secreted proteins; Predicted intracellular proteins	Vesicles (Approved)				0.0	0.0	0.0	0.0	0.0	0.0	0.0	0.0	0.0	0.0	0.0	0.0	0.0	0.0	0.0	0.0	0.0	0.0	0.0	0.0
NPB	256933	symbol	H. sapiens	256933	H. sapiens	NPB	neuropeptide B	GO:0007631 feeding behavior;GO:0007218 neuropeptide signaling pathway;GO:0007610 behavior		Predicted secreted proteins					0.0	0.0	0.0	0.0	0.0	0.0	0.0	0.0	0.0	0.0	0.0	0.0	0.0	0.0	0.0	0.0	0.0	0.0	0.0	0.0
WWTR1	25937	symbol	H. sapiens	25937	H. sapiens	WWTR1	WW domain containing transcription regulator 1	GO:0072307 regulation of metanephric nephron tubule epithelial cell differentiation;GO:0072182 regulation of nephron tubule epithelial cell differentiation;GO:2000696 regulation of epithelial cell differentiation involved in kidney development		Predicted intracellular proteins; Cancer-related genes	Nuclear bodies;Nucleoplasm (Supported); Additional: Cytosol			(M5896)HALLMARK TGF BETA SIGNALING; (M5909)HALLMARK MYOGENESIS	1.0	0.0	0.0	0.0	0.0	0.0	0.0	0.0	0.0	1.0	0.0	0.0	1.0	1.0	0.0	0.0	0.0	0.0	0.0	0.0
C9orf172	389813	gene_synonym	H. sapiens	389813	H. sapiens	AJM1	apical junction component 1 homolog	GO:0045216 cell-cell junction organization;GO:0034330 cell junction organization;GO:0016043 cellular component organization		Predicted intracellular proteins	Cytosol;Focal adhesion sites (Approved)				0.0	0.0	0.0	0.0	0.0	0.0	0.0	0.0	0.0	0.0	0.0	0.0	0.0	0.0	0.0	0.0	0.0	0.0	0.0	0.0
AP3S2	10239	symbol	H. sapiens	10239	H. sapiens	AP3S2	adaptor related protein complex 3 subunit sigma 2	GO:0048490 anterograde synaptic vesicle transport;GO:0099514 synaptic vesicle cytoskeletal transport;GO:0099517 synaptic vesicle transport along microtubule		Predicted intracellular proteins	Vesicles (Approved)				0.0	0.0	0.0	0.0	0.0	0.0	0.0	0.0	0.0	0.0	0.0	0.0	0.0	0.0	0.0	0.0	0.0	0.0	0.0	0.0
FAM45A	404636	gene_synonym	H. sapiens	404636	H. sapiens	DENND10	DENN domain containing 10	GO:2000641 regulation of early endosome to late endosome transport;GO:1903649 regulation of cytoplasmic transport;GO:0032509 endosome transport via multivesicular body sorting pathway		Predicted intracellular proteins	Centrosome;Cytosol;Plasma membrane (Approved)				0.0	0.0	0.0	0.0	0.0	0.0	0.0	0.0	0.0	0.0	0.0	0.0	0.0	0.0	0.0	0.0	0.0	0.0	0.0	0.0
TRAPPC5	126003	symbol	H. sapiens	126003	H. sapiens	TRAPPC5	trafficking protein particle complex subunit 5	GO:0006888 endoplasmic reticulum to Golgi vesicle-mediated transport;GO:0048193 Golgi vesicle transport;GO:0016192 vesicle-mediated transport		Predicted intracellular proteins	Vesicles (Approved)	S-palmitoyl-L-cysteine			0.0	0.0	0.0	0.0	0.0	0.0	0.0	0.0	0.0	0.0	0.0	0.0	0.0	0.0	0.0	0.0	0.0	0.0	0.0	0.0
FEM1A	55527	symbol	H. sapiens	55527	H. sapiens	FEM1A	fem-1 homolog A	GO:0140627 ubiquitin-dependent protein catabolic process via the C-end degron rule pathway;GO:0051438 regulation of ubiquitin-protein transferase activity;GO:0050729 positive regulation of inflammatory response		Predicted intracellular proteins	Golgi apparatus;Nucleoplasm (Supported); Additional: Cytosol				0.0	0.0	0.0	0.0	0.0	0.0	0.0	0.0	0.0	0.0	0.0	0.0	0.0	0.0	0.0	0.0	0.0	0.0	0.0	0.0
TMEM160	54958	symbol	H. sapiens	54958	H. sapiens	TMEM160	transmembrane protein 160								0.0	0.0	0.0	0.0	0.0	0.0	0.0	0.0	0.0	0.0	0.0	0.0	0.0	0.0	0.0	0.0	0.0	0.0	0.0	0.0
SNORA14B	677802	symbol	H. sapiens	677802	H. sapiens	SNORA14B	small nucleolar RNA, H/ACA box 14B	GO:0006396 RNA processing;GO:0016070 RNA metabolic process;GO:0010467 gene expression							0.0	0.0	0.0	0.0	0.0	0.0	0.0	0.0	0.0	0.0	0.0	0.0	0.0	0.0	0.0	0.0	0.0	0.0	0.0	0.0
MDM4	4194	symbol	H. sapiens	4194	H. sapiens	MDM4	MDM4 regulator of p53	GO:0003283 atrial septum development;GO:0003181 atrioventricular valve morphogenesis;GO:0003171 atrioventricular valve development		Predicted intracellular proteins; Cancer-related genes; Human disease related genes:Cancers:Cancers of eye, brain, and central nervous system	Nucleoplasm (Supported)		(M261)PID P53 REGULATION PATHWAY		1.0	1.0	0.0	0.0	0.0	1.0	1.0	0.0	0.0	0.0	0.0	0.0	1.0	0.0	0.0	0.0	0.0	0.0	0.0	0.0
POLR2M	81488	symbol	H. sapiens	81488	H. sapiens	POLR2M	RNA polymerase II subunit M	GO:0051685 maintenance of ER location;GO:0051643 endoplasmic reticulum localization;GO:0051657 maintenance of organelle location		Predicted intracellular proteins	Nucleoplasm (Approved)				1.0	0.0	0.0	0.0	0.0	0.0	0.0	0.0	0.0	0.0	0.0	0.0	0.0	0.0	0.0	0.0	0.0	0.0	0.0	0.0
TIMM8B	26521	symbol	H. sapiens	26521	H. sapiens	TIMM8B	translocase of inner mitochondrial membrane 8 homolog B	GO:0045039 protein insertion into mitochondrial inner membrane;GO:0051204 protein insertion into mitochondrial membrane;GO:0090151 establishment of protein localization to mitochondrial membrane		Predicted intracellular proteins				(M5936)HALLMARK OXIDATIVE PHOSPHORYLATION	0.0	0.0	0.0	0.0	0.0	0.0	0.0	0.0	0.0	0.0	0.0	0.0	0.0	0.0	0.0	0.0	0.0	0.0	1.0	0.0
NES	10763	symbol	H. sapiens	10763	H. sapiens	NES	nestin	GO:0030842 regulation of intermediate filament depolymerization;GO:0030844 positive regulation of intermediate filament depolymerization;GO:0045108 regulation of intermediate filament polymerization or depolymerization		Predicted intracellular proteins	Intermediate filaments (Enhanced)				0.0	0.0	0.0	0.0	0.0	0.0	1.0	0.0	0.0	0.0	0.0	0.0	0.0	0.0	1.0	1.0	0.0	0.0	0.0	0.0
OR1N1	138883	symbol	H. sapiens	138883	H. sapiens	OR1N1	olfactory receptor family 1 subfamily N member 1	GO:0050911 detection of chemical stimulus involved in sensory perception of smell;GO:0007608 sensory perception of smell;GO:0050907 detection of chemical stimulus involved in sensory perception		G-protein coupled receptors:Odorant/olfactory and gustatory receptors					0.0	0.0	0.0	0.0	0.0	0.0	0.0	0.0	0.0	0.0	0.0	0.0	0.0	0.0	0.0	0.0	0.0	0.0	0.0	0.0
PDCD2	5134	symbol	H. sapiens	5134	H. sapiens	PDCD2	programmed cell death 2	GO:1902035 positive regulation of hematopoietic stem cell proliferation;GO:1902033 regulation of hematopoietic stem cell proliferation;GO:2000648 positive regulation of stem cell proliferation		Predicted intracellular proteins	Nucleoplasm (Approved); Additional: Cytokinetic bridge				0.0	0.0	0.0	0.0	0.0	0.0	0.0	0.0	0.0	0.0	0.0	0.0	0.0	0.0	0.0	0.0	0.0	0.0	0.0	0.0
C3orf58	205428	gene_synonym	H. sapiens	205428	H. sapiens	DIPK2A	divergent protein kinase domain 2A	GO:1900019 regulation of protein kinase C activity;GO:1900020 positive regulation of protein kinase C activity;GO:0060038 cardiac muscle cell proliferation		Predicted secreted proteins; Predicted intracellular proteins; Disease related genes					0.0	0.0	0.0	0.0	0.0	0.0	0.0	0.0	0.0	0.0	0.0	0.0	0.0	0.0	0.0	0.0	0.0	0.0	0.0	0.0
SNORA34	677815	gene_synonym	H. sapiens	677815	H. sapiens	SNORA2C	small nucleolar RNA, H/ACA box 2C	GO:0006396 RNA processing;GO:0016070 RNA metabolic process;GO:0010467 gene expression							0.0	0.0	0.0	0.0	0.0	0.0	0.0	0.0	0.0	0.0	0.0	0.0	0.0	0.0	0.0	0.0	0.0	0.0	0.0	0.0
ETHE1	23474	symbol	H. sapiens	23474	H. sapiens	ETHE1	ETHE1 persulfide dioxygenase	GO:0070813 hydrogen sulfide metabolic process;GO:0006749 glutathione metabolic process;GO:0006575 cellular modified amino acid metabolic process		ENZYME proteins:Oxidoreductases; Disease related genes; Potential drug targets; Enzymes; Predicted intracellular proteins; Human disease related genes:Congenital disorders of metabolism:Other congenital disorders of metabolism	Mitochondria (Enhanced)			(M5892)HALLMARK CHOLESTEROL HOMEOSTASIS	0.0	0.0	0.0	0.0	0.0	0.0	0.0	1.0	0.0	0.0	0.0	0.0	0.0	0.0	0.0	0.0	1.0	0.0	0.0	0.0
IGF2BP1	10642	symbol	H. sapiens	10642	H. sapiens	IGF2BP1	insulin like growth factor 2 mRNA binding protein 1	GO:0022013 pallium cell proliferation in forebrain;GO:0010610 regulation of mRNA stability involved in response to stress;GO:0070934 CRD-mediated mRNA stabilization		Predicted intracellular proteins	Cytosol (Supported)		(M223)PID BETA CATENIN NUC PATHWAY		0.0	0.0	0.0	0.0	0.0	0.0	0.0	1.0	0.0	0.0	1.0	0.0	0.0	0.0	0.0	1.0	0.0	0.0	0.0	0.0
FOXK1	221937	symbol	H. sapiens	221937	H. sapiens	FOXK1	forkhead box K1	GO:0006735 NADH regeneration;GO:0061621 canonical glycolysis;GO:0061718 glucose catabolic process to pyruvate		Transcription factors:Helix-turn-helix domains; Predicted intracellular proteins	Nucleoplasm (Supported); Additional: Nucleoli fibrillar center				0.0	1.0	0.0	0.0	0.0	0.0	0.0	0.0	0.0	0.0	0.0	0.0	0.0	0.0	0.0	0.0	0.0	0.0	0.0	0.0
ZNF804A	91752	symbol	H. sapiens	91752	H. sapiens	ZNF804A	zinc finger protein 804A	GO:1902952 positive regulation of dendritic spine maintenance;GO:1902950 regulation of dendritic spine maintenance;GO:0099175 regulation of postsynapse organization		Predicted intracellular proteins	Endoplasmic reticulum (Approved)				0.0	0.0	0.0	0.0	0.0	0.0	0.0	0.0	0.0	0.0	0.0	0.0	0.0	0.0	0.0	0.0	0.0	1.0	0.0	0.0
ASH1L-AS1	645676	symbol	H. sapiens	645676	H. sapiens	ASH1L-AS1	ASH1L antisense RNA 1								0.0	0.0	0.0	0.0	0.0	0.0	0.0	0.0	0.0	0.0	0.0	0.0	0.0	0.0	0.0	0.0	0.0	0.0	0.0	0.0
G6PD	2539	symbol	H. sapiens	2539	H. sapiens	G6PD	glucose-6-phosphate dehydrogenase	GO:0010732 regulation of protein glutathionylation;GO:0010734 negative regulation of protein glutathionylation;GO:0019322 pentose biosynthetic process		Human disease related genes:Immune system diseases:Primary immunodeficiency; ENZYME proteins:Oxidoreductases; Cancer-related genes:Candidate cancer biomarkers; Human disease related genes:Cardiovascular diseases:Hematologic diseases; Human disease related genes:Congenital disorders of metabolism:Congenital disorders of amino acid metabolism; Disease related genes; Potential drug targets; Enzymes;…	Cytosol (Enhanced); Additional: Centriolar satellite	Glycolic acid; Nicotinamide adenine dinucleotide phosphate; 16-Bromoepiandrosterone; Artenimol		(M5938)HALLMARK REACTIVE OXYGEN SPECIES PATHWAY; (M5924)HALLMARK MTORC1 SIGNALING; (M5937)HALLMARK GLYCOLYSIS	1.0	0.0	0.0	0.0	0.0	1.0	0.0	1.0	0.0	0.0	0.0	0.0	0.0	0.0	1.0	1.0	1.0	0.0	0.0	0.0
PCSK2	5126	symbol	H. sapiens	5126	H. sapiens	PCSK2	proprotein convertase subtilisin/kexin type 2	GO:0034231 islet amyloid polypeptide processing;GO:0034230 enkephalin processing;GO:0030070 insulin processing		ENZYME proteins:Hydrolases; Predicted secreted proteins; Enzymes; Predicted intracellular proteins; Peptidases:Serine-type peptidases	Vesicles (Approved)	Insulin pork		(M5957)HALLMARK PANCREAS BETA CELLS	0.0	0.0	0.0	0.0	0.0	0.0	0.0	1.0	0.0	0.0	0.0	0.0	0.0	0.0	0.0	0.0	0.0	0.0	0.0	0.0
RFXANK	8625	symbol	H. sapiens	8625	H. sapiens	RFXANK	regulatory factor X associated ankyrin containing protein	GO:0007265 Ras protein signal transduction;GO:0007264 small GTPase mediated signal transduction;GO:0045944 positive regulation of transcription by RNA polymerase II		Human disease related genes:Immune system diseases:Primary immunodeficiency; Predicted intracellular proteins; Transcription factors:Yet undefined DNA-binding domains; Disease related genes	Nucleoplasm (Enhanced)		(M30)PID HDAC CLASSII PATHWAY		0.0	0.0	0.0	0.0	0.0	0.0	0.0	0.0	0.0	0.0	0.0	0.0	0.0	0.0	0.0	0.0	0.0	0.0	0.0	0.0
IL12A	3592	symbol	H. sapiens	3592	H. sapiens	IL12A	interleukin 12A	GO:0002860 positive regulation of natural killer cell mediated cytotoxicity directed against tumor cell target;GO:0002857 positive regulation of natural killer cell mediated immune response to tumor cell;GO:0002858 regulation of natural killer cell mediated cytotoxicity directed against tumor cell target		Predicted secreted proteins; Cancer-related genes:Candidate cancer biomarkers			(M36)PID IL27 PATHWAY; (M54)PID IL12 2PATHWAY; (M5883)NABA SECRETED FACTORS	(M5950)HALLMARK ALLOGRAFT REJECTION	0.0	0.0	1.0	0.0	0.0	0.0	0.0	1.0	1.0	0.0	0.0	0.0	0.0	0.0	0.0	0.0	0.0	0.0	0.0	0.0
POLRMT	5442	symbol	H. sapiens	5442	H. sapiens	POLRMT	RNA polymerase mitochondrial	GO:0006390 mitochondrial transcription;GO:0000959 mitochondrial RNA metabolic process;GO:0140053 mitochondrial gene expression		Enzymes; Predicted intracellular proteins; ENZYME proteins:Transferases	Mitochondria (Supported)				1.0	0.0	0.0	0.0	0.0	0.0	0.0	0.0	0.0	0.0	0.0	0.0	0.0	0.0	0.0	0.0	0.0	0.0	0.0	0.0
PWAR5	8123	symbol	H. sapiens	8123	H. sapiens	PWAR5	Prader Willi/Angelman region RNA 5	GO:0006396 RNA processing;GO:0016070 RNA metabolic process;GO:0010467 gene expression							0.0	0.0	0.0	0.0	0.0	0.0	0.0	0.0	0.0	0.0	0.0	0.0	0.0	0.0	0.0	0.0	0.0	0.0	0.0	0.0
ATXN7	6314	symbol	H. sapiens	6314	H. sapiens	ATXN7	ataxin 7	GO:0007026 negative regulation of microtubule depolymerization;GO:0035521 monoubiquitinated histone deubiquitination;GO:0035522 monoubiquitinated histone H2A deubiquitination		Predicted intracellular proteins; Human disease related genes:Nervous system diseases:Neurodegenerative diseases; Disease related genes	Cytosol;Nucleoplasm (Approved)				1.0	1.0	0.0	0.0	1.0	0.0	0.0	0.0	0.0	0.0	0.0	0.0	0.0	0.0	0.0	0.0	0.0	0.0	0.0	0.0
PRH2	5555	symbol	H. sapiens	5555	H. sapiens	PRH2	proline rich protein HaeIII subfamily 2			Predicted secreted proteins					0.0	0.0	0.0	0.0	0.0	0.0	0.0	0.0	0.0	0.0	0.0	0.0	0.0	0.0	0.0	0.0	0.0	0.0	0.0	0.0
LETM1	3954	symbol	H. sapiens	3954	H. sapiens	LETM1	leucine zipper and EF-hand containing transmembrane protein 1	GO:0099093 calcium export from the mitochondrion;GO:0051562 negative regulation of mitochondrial calcium ion concentration;GO:1900069 regulation of cellular hyperosmotic salinity response		Human disease related genes:Other congenital disorders:Chromosomal abnormalities; Transporters:Electrochemical Potential-driven transporters	Mitochondria (Supported)				1.0	0.0	0.0	0.0	0.0	0.0	0.0	0.0	0.0	0.0	0.0	0.0	0.0	0.0	0.0	0.0	0.0	0.0	1.0	0.0
SHROOM2	357	symbol	H. sapiens	357	H. sapiens	SHROOM2	shroom family member 2	GO:0008057 eye pigment granule organization;GO:0043476 pigment accumulation;GO:0043482 cellular pigment accumulation		Predicted intracellular proteins	Cell Junctions;Plasma membrane (Approved); Additional: Cytosol			(M5916)HALLMARK APICAL SURFACE; (M5893)HALLMARK MITOTIC SPINDLE; (M5915)HALLMARK APICAL JUNCTION	0.0	0.0	0.0	0.0	0.0	0.0	1.0	0.0	0.0	0.0	0.0	0.0	0.0	0.0	0.0	1.0	0.0	0.0	0.0	0.0
AKAP2	445815	gene_synonym	H. sapiens	445815	H. sapiens	PALM2AKAP2	PALM2 and AKAP2 fusion	GO:0008360 regulation of cell shape;GO:0022604 regulation of cell morphogenesis;GO:0022603 regulation of anatomical structure morphogenesis		Predicted intracellular proteins	Plasma membrane (Approved); Additional: Nuclear bodies;Nucleoplasm				0.0	0.0	0.0	0.0	0.0	0.0	0.0	0.0	0.0	0.0	0.0	0.0	0.0	0.0	0.0	0.0	0.0	0.0	0.0	0.0
CAMK2D	817	symbol	H. sapiens	817	H. sapiens	CAMK2D	calcium/calmodulin dependent protein kinase II delta	GO:1901897 regulation of relaxation of cardiac muscle;GO:0098909 regulation of cardiac muscle cell action potential involved in regulation of contraction;GO:1901725 regulation of histone deacetylase activity	CAMK Ser/Thr protein kinase family	Enzymes; Kinases:CAMK Ser/Thr protein kinases; Predicted intracellular proteins; ENZYME proteins:Transferases	Plasma membrane (Approved); Additional: Cell Junctions;Cytosol	2-[4-[4-[(5-cyclopropyl-1H-pyrazol-3-yl)amino]quinazolin-2-yl]iminocyclohexa-2,5-dien-1-yl]acetonitrile; (3Z)-N,N-DIMETHYL-2-OXO-3-(4,5,6,7-TETRAHYDRO-1H-INDOL-2-YLMETHYLIDENE)-2,3-DIHYDRO-1H-INDOLE-5-SULFONAMIDE; Fostamatinib	(M161)PID IFNG PATHWAY; (M288)PID HES HEY PATHWAY		1.0	1.0	1.0	0.0	0.0	0.0	0.0	0.0	1.0	0.0	1.0	1.0	0.0	0.0	0.0	0.0	0.0	0.0	0.0	0.0
C20orf24	55969	gene_synonym	H. sapiens	55969	H. sapiens	RAB5IF	RAB5 interacting factor	GO:0097250 mitochondrial respirasome assembly;GO:0007005 mitochondrion organization;GO:0034622 cellular protein-containing complex assembly			Cytosol (Approved)				0.0	0.0	0.0	0.0	0.0	0.0	0.0	0.0	0.0	0.0	0.0	0.0	0.0	0.0	0.0	0.0	0.0	0.0	1.0	0.0
PLXDC1	57125	symbol	H. sapiens	57125	H. sapiens	PLXDC1	plexin domain containing 1	GO:0021510 spinal cord development;GO:0001525 angiogenesis;GO:0048514 blood vessel morphogenesis		Predicted intracellular proteins			(M5880)NABA ECM AFFILIATED; (M5885)NABA MATRISOME ASSOCIATED; (M5889)NABA MATRISOME		0.0	0.0	0.0	0.0	0.0	0.0	0.0	0.0	0.0	0.0	0.0	0.0	0.0	0.0	0.0	0.0	0.0	0.0	0.0	0.0
RNF215	200312	symbol	H. sapiens	200312	H. sapiens	RNF215	ring finger protein 215	GO:0006896 Golgi to vacuole transport;GO:0006623 protein targeting to vacuole;GO:0072666 establishment of protein localization to vacuole		Predicted intracellular proteins	Microtubules (Approved); Additional: Nucleoli				0.0	0.0	0.0	0.0	0.0	0.0	0.0	0.0	0.0	0.0	0.0	0.0	0.0	0.0	0.0	0.0	0.0	0.0	0.0	0.0
HSPA1B	3304	symbol	H. sapiens	3304	H. sapiens	HSPA1B	heat shock protein family A (Hsp70) member 1B	GO:0010286 heat acclimation;GO:0070370 cellular heat acclimation;GO:0070434 positive regulation of nucleotide-binding oligomerization domain containing 2 signaling pathway		Predicted intracellular proteins	Cytosol;Vesicles (Approved); Additional: Nucleoplasm				1.0	0.0	0.0	0.0	0.0	0.0	0.0	0.0	0.0	0.0	1.0	0.0	0.0	0.0	0.0	0.0	0.0	0.0	0.0	0.0
ANXA2P1	303	symbol	H. sapiens	303	H. sapiens	ANXA2P1	annexin A2 pseudogene 1								0.0	0.0	0.0	0.0	0.0	0.0	0.0	0.0	0.0	0.0	0.0	0.0	0.0	0.0	0.0	0.0	0.0	0.0	0.0	0.0
SNX22	79856	symbol	H. sapiens	79856	H. sapiens	SNX22	sorting nexin 22	GO:0015031 protein transport;GO:0045184 establishment of protein localization;GO:0071705 nitrogen compound transport		Predicted intracellular proteins	Vesicles (Approved); Additional: Nucleoplasm				0.0	0.0	0.0	0.0	0.0	0.0	0.0	0.0	0.0	0.0	0.0	0.0	0.0	0.0	0.0	0.0	0.0	0.0	0.0	0.0
MTHFS	10588	symbol	H. sapiens	10588	H. sapiens	MTHFS	methenyltetrahydrofolate synthetase	GO:0046657 folic acid catabolic process;GO:0042365 water-soluble vitamin catabolic process;GO:0009397 folic acid-containing compound catabolic process		ENZYME proteins:Ligase; Human disease related genes:Other diseases:Mental and behavioural disorders; Disease related genes; Potential drug targets; Enzymes; Predicted intracellular proteins	Cytosol (Supported)				1.0	0.0	0.0	0.0	0.0	0.0	0.0	1.0	0.0	0.0	0.0	0.0	0.0	0.0	0.0	0.0	1.0	0.0	0.0	0.0
RBM15	64783	symbol	H. sapiens	64783	H. sapiens	RBM15	RNA binding motif protein 15	GO:0038163 thrombopoietin-mediated signaling pathway;GO:0007221 positive regulation of transcription of Notch receptor target;GO:0009048 dosage compensation by inactivation of X chromosome		Predicted intracellular proteins; Cancer-related genes; Disease related genes	Nucleoplasm (Enhanced)				1.0	0.0	1.0	0.0	0.0	0.0	1.0	0.0	0.0	0.0	1.0	0.0	0.0	0.0	0.0	0.0	0.0	0.0	0.0	0.0
ITGA10	8515	symbol	H. sapiens	8515	H. sapiens	ITGA10	integrin subunit alpha 10	GO:0033627 cell adhesion mediated by integrin;GO:0007229 integrin-mediated signaling pathway;GO:0007160 cell-matrix adhesion					(M47)PID INTEGRIN CS PATHWAY; (M67)PID ARF6 TRAFFICKING PATHWAY; (M18)PID INTEGRIN1 PATHWAY	(M5915)HALLMARK APICAL JUNCTION	0.0	0.0	0.0	0.0	0.0	0.0	0.0	0.0	0.0	0.0	0.0	0.0	0.0	0.0	0.0	0.0	0.0	0.0	0.0	0.0
TKT	7086	symbol	H. sapiens	7086	H. sapiens	TKT	transketolase	GO:0046166 glyceraldehyde-3-phosphate biosynthetic process;GO:0019682 glyceraldehyde-3-phosphate metabolic process;GO:0009052 pentose-phosphate shunt, non-oxidative branch		Human disease related genes:Congenital disorders of metabolism:Congenital disorders of carbohydrate metabolism; Disease related genes; Potential drug targets; Enzymes; Predicted intracellular proteins; ENZYME proteins:Transferases	Nucleoplasm (Enhanced)	Copper		(M5905)HALLMARK ADIPOGENESIS	0.0	0.0	0.0	0.0	0.0	0.0	0.0	0.0	0.0	0.0	0.0	0.0	0.0	0.0	0.0	0.0	0.0	0.0	0.0	0.0
ABHD17A	81926	symbol	H. sapiens	81926	H. sapiens	ABHD17A	abhydrolase domain containing 17A, depalmitoylase	GO:1902816 regulation of protein localization to microtubule;GO:1902817 negative regulation of protein localization to microtubule;GO:0002084 protein depalmitoylation		Enzymes; ENZYME proteins:Hydrolases; Predicted intracellular proteins; Transporters	Vesicles (Approved); Additional: Nuclear speckles				0.0	0.0	0.0	0.0	0.0	0.0	0.0	0.0	0.0	0.0	0.0	0.0	0.0	0.0	0.0	0.0	0.0	1.0	0.0	0.0
CCDC6	8030	symbol	H. sapiens	8030	H. sapiens	CCDC6	coiled-coil domain containing 6	GO:0007010 cytoskeleton organization;GO:0006996 organelle organization;GO:0016043 cellular component organization		Human disease related genes:Cancers:Cancers of endocrine organs; Predicted intracellular proteins; Cancer-related genes:Mutated cancer genes; Disease related genes	Cytosol (Supported)				0.0	0.0	0.0	0.0	0.0	0.0	0.0	0.0	1.0	0.0	0.0	0.0	0.0	0.0	0.0	0.0	0.0	0.0	0.0	0.0
THRIL	102659353	symbol	H. sapiens	102659353	H. sapiens	THRIL	TNF and HNRNPL related immunoregulatory long non-coding RNA								0.0	0.0	0.0	0.0	0.0	0.0	0.0	0.0	0.0	0.0	0.0	0.0	0.0	0.0	0.0	0.0	0.0	0.0	0.0	0.0
BCL11A	53335	symbol	H. sapiens	53335	H. sapiens	BCL11A	BAF chromatin remodeling complex subunit BCL11A	GO:1904799 regulation of neuron remodeling;GO:1904800 negative regulation of neuron remodeling;GO:2000173 negative regulation of branching morphogenesis of a nerve		Human disease related genes:Other diseases:Mental and behavioural disorders; Cancer-related genes:Candidate cancer biomarkers; Transcription factors:Zinc-coordinating DNA-binding domains; Disease related genes; Predicted intracellular proteins	Nucleoplasm (Supported); Additional: Nuclear bodies				1.0	0.0	0.0	0.0	1.0	0.0	0.0	0.0	0.0	0.0	0.0	0.0	0.0	0.0	0.0	0.0	0.0	0.0	0.0	0.0
PEG3	5178	symbol	H. sapiens	5178	H. sapiens	PEG3	paternally expressed 3	GO:0006915 apoptotic process;GO:0012501 programmed cell death;GO:0000122 negative regulation of transcription by RNA polymerase II		Predicted intracellular proteins; Transcription factors:Zinc-coordinating DNA-binding domains	Nucleoplasm (Approved)			(M5953)HALLMARK KRAS SIGNALING UP	0.0	0.0	0.0	0.0	0.0	0.0	0.0	0.0	0.0	0.0	0.0	0.0	0.0	0.0	0.0	0.0	0.0	0.0	0.0	0.0
FLJ23867						None	None	None	None	None	None	None	None	None	nan	nan	nan	nan	nan	nan	nan	nan	nan	nan	nan	nan	nan	nan	nan	nan	nan	nan	nan	nan
NCDN	23154	symbol	H. sapiens	23154	H. sapiens	NCDN	neurochondrin	GO:0045453 bone resorption;GO:0046849 bone remodeling;GO:0048168 regulation of neuronal synaptic plasticity		Predicted intracellular proteins	Cytosol (Supported)				0.0	0.0	0.0	0.0	0.0	0.0	0.0	0.0	0.0	0.0	0.0	0.0	0.0	0.0	0.0	0.0	0.0	0.0	0.0	0.0
TMEM130	222865	symbol	H. sapiens	222865	H. sapiens	TMEM130	transmembrane protein 130			Predicted intracellular proteins	Golgi apparatus (Supported)				0.0	0.0	0.0	0.0	0.0	0.0	0.0	0.0	0.0	0.0	0.0	0.0	0.0	0.0	0.0	0.0	0.0	0.0	0.0	0.0
EEF2K	29904	symbol	H. sapiens	29904	H. sapiens	EEF2K	eukaryotic elongation factor 2 kinase	GO:0071454 cellular response to anoxia;GO:1990637 response to prolactin;GO:0034059 response to anoxia	Atypical: Alpha-type protein kinase family	Enzymes; Predicted intracellular proteins; Kinases:Atypical kinases; ENZYME proteins:Transferases	Nucleoplasm (Approved)		(M209)PID P38 GAMMA DELTA PATHWAY; (M121)PID MTOR 4PATHWAY		0.0	0.0	0.0	0.0	0.0	0.0	0.0	1.0	0.0	0.0	0.0	0.0	1.0	0.0	0.0	0.0	0.0	1.0	0.0	0.0
MAP2K2	5605	symbol	H. sapiens	5605	H. sapiens	MAP2K2	mitogen-activated protein kinase kinase 2	GO:0090170 regulation of Golgi inheritance;GO:0036289 peptidyl-serine autophosphorylation;GO:1903800 positive regulation of production of miRNAs involved in gene silencing by miRNA	STE Ser/Thr protein kinase family	FDA approved drug targets:Small molecule drugs; Cancer-related genes:Candidate cancer biomarkers; Human disease related genes:Cancers:Cancers of haematopoietic and lymphoid tissues; Human disease related genes:Congenital malformations:Other congenital malformations; Disease related genes; Enzymes; RAS pathway related proteins; Kinases:STE Ser/Thr protein kinases; Predicted intracellular proteins;…	Cytosol (Supported)	Bosutinib; Trametinib; Selumetinib; Binimetinib; Fostamatinib	(M18895)SA TRKA RECEPTOR; (M267)PID ANTHRAX PATHWAY; (M213)PID AR NONGENOMIC PATHWAY		1.0	0.0	0.0	0.0	0.0	0.0	0.0	0.0	1.0	0.0	1.0	0.0	1.0	0.0	0.0	0.0	0.0	0.0	0.0	1.0
VPS18	57617	symbol	H. sapiens	57617	H. sapiens	VPS18	VPS18 core subunit of CORVET and HOPS complexes	GO:0033147 negative regulation of intracellular estrogen receptor signaling pathway;GO:0033146 regulation of intracellular estrogen receptor signaling pathway;GO:0006904 vesicle docking involved in exocytosis		Predicted intracellular proteins					0.0	0.0	0.0	0.0	0.0	0.0	0.0	0.0	0.0	0.0	0.0	0.0	0.0	0.0	0.0	0.0	0.0	0.0	0.0	0.0
AGO2	27161	symbol	H. sapiens	27161	H. sapiens	AGO2	argonaute RISC catalytic component 2	GO:0090625 mRNA destabilization-mediated gene silencing by siRNA;GO:0045974 regulation of translation, ncRNA-mediated;GO:0045975 positive regulation of translation, ncRNA-mediated		Enzymes; ENZYME proteins:Hydrolases; Predicted intracellular proteins	Cytoplasmic bodies (Supported); Additional: Cytosol			(M5941)HALLMARK UV RESPONSE UP	1.0	0.0	0.0	0.0	0.0	1.0	0.0	1.0	0.0	0.0	1.0	0.0	0.0	0.0	0.0	0.0	0.0	0.0	0.0	0.0
CELF1	10658	symbol	H. sapiens	10658	H. sapiens	CELF1	CUGBP Elav-like family member 1	GO:0016246 RNA interference;GO:0006376 mRNA splice site selection;GO:0000381 regulation of alternative mRNA splicing, via spliceosome		Predicted intracellular proteins	Nucleoplasm (Enhanced)				0.0	0.0	0.0	0.0	0.0	0.0	0.0	0.0	0.0	0.0	1.0	0.0	0.0	0.0	0.0	0.0	0.0	0.0	0.0	0.0
PYCR2	29920	symbol	H. sapiens	29920	H. sapiens	PYCR2	pyrroline-5-carboxylate reductase 2	GO:0006561 proline biosynthetic process;GO:0055129 L-proline biosynthetic process;GO:0006560 proline metabolic process		ENZYME proteins:Oxidoreductases; Human disease related genes:Congenital disorders of metabolism:Congenital disorders of lipid/glycolipid metabolism; Disease related genes; Potential drug targets; Enzymes; Predicted intracellular proteins	Mitochondria (Approved)	NADH; Proline			1.0	0.0	0.0	0.0	0.0	0.0	0.0	1.0	0.0	0.0	0.0	0.0	0.0	0.0	0.0	0.0	0.0	0.0	0.0	0.0
INA	9118	symbol	H. sapiens	9118	H. sapiens	INA	internexin neuronal intermediate filament protein alpha	GO:0099185 postsynaptic intermediate filament cytoskeleton organization;GO:0060052 neurofilament cytoskeleton organization;GO:0098974 postsynaptic actin cytoskeleton organization		Predicted intracellular proteins	Intermediate filaments (Approved); Additional: Cytosol				0.0	0.0	0.0	0.0	0.0	0.0	0.0	0.0	0.0	0.0	0.0	0.0	0.0	0.0	0.0	1.0	0.0	0.0	0.0	0.0
SMG1P3	100271836	symbol	H. sapiens	100271836	H. sapiens	SMG1P3	SMG1 pseudogene 3								0.0	0.0	0.0	0.0	0.0	0.0	0.0	0.0	0.0	0.0	0.0	0.0	0.0	0.0	0.0	0.0	0.0	0.0	0.0	0.0
FGFR1	2260	symbol	H. sapiens	2260	H. sapiens	FGFR1	fibroblast growth factor receptor 1	GO:1904849 positive regulation of cell chemotaxis to fibroblast growth factor;GO:2000546 positive regulation of endothelial cell chemotaxis to fibroblast growth factor;GO:2000544 regulation of endothelial cell chemotaxis to fibroblast growth factor	Tyr protein kinase family	FDA approved drug targets:Small molecule drugs; CD markers; Cancer-related genes:Candidate cancer biomarkers; Transporters:Accessory Factors Involved in Transport; Human disease related genes:Congenital malformations:Congenital malformations of the musculoskeletal system; Human disease related genes:Cancers:Cancers of the breast and female genital organs; Human disease related genes:Congenital ma…		Palifermin; Sorafenib; Heparin; 3-[4-(1-formylpiperazin-4-yl)-benzylidenyl]-2-indolinone; XL999; 3-(3-methoxybenzyl)-1H-pyrrolo[2,3-b]pyridine; (E)-[4-(3,5-Difluorophenyl)-3H-pyrrolo[2,3-b]pyridin-3-ylidene](3-methoxyphenyl)methanol; 3-[(3-(2-CARBOXYETHYL)-4-METHYLPYRROL-2-YL)METHYLENE]-2-INDOLINONE; Regorafenib; Ponatinib; Lenvatinib; Nintedanib; Fostamatinib; Erdafitinib; Pemigatinib; Selpercat…	(M33)PID GLYPICAN 1PATHWAY; (M165)PID SYNDECAN 4 PATHWAY; (M266)PID NCADHERIN PATHWAY	(M5944)HALLMARK ANGIOGENESIS	0.0	0.0	0.0	0.0	0.0	1.0	0.0	0.0	1.0	0.0	0.0	0.0	1.0	0.0	0.0	0.0	0.0	0.0	0.0	0.0
SOX2	6657	symbol	H. sapiens	6657	H. sapiens	SOX2	SRY-box transcription factor 2	GO:0001714 endodermal cell fate specification;GO:0021781 glial cell fate commitment;GO:0001711 endodermal cell fate commitment		Human disease related genes:Congenital malformations:Congenital malformations of eye; Human disease related genes:Congenital malformations:Congenital malformations of the nervous system; Disease related genes; Transcription factors:Other all-alpha-helical DNA-binding domains; Predicted intracellular proteins; Cancer-related genes	Nucleoplasm (Enhanced)				1.0	0.0	1.0	0.0	0.0	0.0	1.0	0.0	1.0	1.0	1.0	0.0	0.0	0.0	0.0	1.0	0.0	0.0	0.0	0.0
INO80D	54891	symbol	H. sapiens	54891	H. sapiens	INO80D	INO80 complex subunit D	GO:0060382 regulation of DNA strand elongation;GO:0042766 nucleosome mobilization;GO:0006275 regulation of DNA replication		Predicted intracellular proteins					1.0	1.0	0.0	0.0	0.0	0.0	0.0	0.0	0.0	0.0	0.0	0.0	0.0	0.0	0.0	0.0	0.0	0.0	0.0	0.0
KDM5C	8242	symbol	H. sapiens	8242	H. sapiens	KDM5C	lysine demethylase 5C	GO:0034721 histone H3-K4 demethylation, trimethyl-H3-K4-specific;GO:0034720 histone H3-K4 demethylation;GO:0070076 histone lysine demethylation		Transcription factors:Helix-turn-helix domains; Cancer-related genes:Mutated cancer genes; Human disease related genes:Other diseases:Mental and behavioural disorders; ENZYME proteins:Oxidoreductases; Cancer-related genes:Mutational cancer driver genes; Disease related genes; Potential drug targets; Enzymes; Predicted intracellular proteins	Nucleoplasm (Enhanced); Additional: Cytosol				1.0	0.0	0.0	0.0	0.0	0.0	0.0	0.0	0.0	0.0	0.0	0.0	0.0	0.0	0.0	0.0	0.0	0.0	0.0	0.0
ABCA11P	79963	symbol	H. sapiens	79963	H. sapiens	ABCA11P	ATP binding cassette subfamily A member 11, pseudogene								0.0	0.0	0.0	0.0	0.0	0.0	0.0	0.0	0.0	0.0	0.0	0.0	0.0	0.0	0.0	0.0	0.0	0.0	0.0	0.0
LNPEP	4012	symbol	H. sapiens	4012	H. sapiens	LNPEP	leucyl and cystinyl aminopeptidase	GO:0002480 antigen processing and presentation of exogenous peptide antigen via MHC class I, TAP-independent;GO:0042590 antigen processing and presentation of exogenous peptide antigen via MHC class I;GO:0002474 antigen processing and presentation of peptide antigen via MHC class I		Enzymes; ENZYME proteins:Hydrolases; Peptidases:Metallopeptidases			(M247)PID INSULIN GLUCOSE PATHWAY; (M7955)SIG INSULIN RECEPTOR PATHWAY IN CARDIAC MYOCYTES		0.0	0.0	0.0	0.0	0.0	0.0	0.0	1.0	0.0	0.0	0.0	0.0	0.0	0.0	0.0	0.0	0.0	0.0	0.0	0.0
SYDE2	84144	symbol	H. sapiens	84144	H. sapiens	SYDE2	synapse defective Rho GTPase homolog 2	GO:0090630 activation of GTPase activity;GO:0043547 positive regulation of GTPase activity;GO:0051056 regulation of small GTPase mediated signal transduction		Predicted intracellular proteins	Golgi apparatus;Nucleoli;Nucleoli rim (Approved)				1.0	0.0	0.0	0.0	0.0	0.0	0.0	0.0	0.0	0.0	0.0	0.0	0.0	0.0	0.0	0.0	0.0	0.0	0.0	0.0
SNORA74A	26821	symbol	H. sapiens	26821	H. sapiens	SNORA74A	small nucleolar RNA, H/ACA box 74A	GO:0006396 RNA processing;GO:0016070 RNA metabolic process;GO:0010467 gene expression							0.0	0.0	0.0	0.0	0.0	0.0	0.0	0.0	0.0	0.0	0.0	0.0	0.0	0.0	0.0	0.0	0.0	0.0	0.0	0.0
ARSJ	79642	symbol	H. sapiens	79642	H. sapiens	ARSJ	arylsulfatase family member J			Predicted secreted proteins; Predicted intracellular proteins	Actin filaments (Enhanced)				0.0	0.0	0.0	0.0	0.0	0.0	0.0	0.0	0.0	0.0	0.0	0.0	0.0	0.0	0.0	0.0	0.0	0.0	0.0	0.0
UQCRH	7388	symbol	H. sapiens	7388	H. sapiens	UQCRH	ubiquinol-cytochrome c reductase hinge protein	GO:0006122 mitochondrial electron transport, ubiquinol to cytochrome c;GO:0019646 aerobic electron transport chain;GO:0042773 ATP synthesis coupled electron transport		Predicted intracellular proteins		2-Hexyloxy-6-Hydroxymethyl-Tetrahydro-Pyran-3,4,5-Triol; 6-Hydroxy-5-undecyl-4,7-benzothiazoledione; Azoxystrobin; (5S)-3-ANILINO-5-(2,4-DIFLUOROPHENYL)-5-METHYL-1,3-OXAZOLIDINE-2,4-DIONE; (S)-famoxadone; METHYL (2Z)-3-METHOXY-2-{2-[(E)-2-PHENYLVINYL]PHENYL}ACRYLATE; 2-Nonyl-4-quinolinol 1-oxide; Ubiquinone Q2		(M5936)HALLMARK OXIDATIVE PHOSPHORYLATION	0.0	0.0	0.0	0.0	0.0	1.0	0.0	0.0	0.0	0.0	0.0	0.0	0.0	0.0	0.0	0.0	0.0	0.0	0.0	0.0
SNORA12	677800	symbol	H. sapiens	677800	H. sapiens	SNORA12	small nucleolar RNA, H/ACA box 12	GO:0006396 RNA processing;GO:0016070 RNA metabolic process;GO:0010467 gene expression							0.0	0.0	0.0	0.0	0.0	0.0	0.0	0.0	0.0	0.0	0.0	0.0	0.0	0.0	0.0	0.0	0.0	0.0	0.0	0.0
AEN	64782	symbol	H. sapiens	64782	H. sapiens	AEN	apoptosis enhancing nuclease	GO:0042771 intrinsic apoptotic signaling pathway in response to DNA damage by p53 class mediator;GO:0072332 intrinsic apoptotic signaling pathway by p53 class mediator;GO:0008630 intrinsic apoptotic signaling pathway in response to DNA damage		Predicted intracellular proteins	Nucleoli;Nucleoplasm (Supported); Additional: Nuclear membrane		(M256)PID TAP63 PATHWAY; (M19)PID P73PATHWAY	(M5939)HALLMARK P53 PATHWAY	0.0	0.0	0.0	1.0	0.0	0.0	0.0	0.0	0.0	0.0	0.0	0.0	0.0	0.0	0.0	0.0	0.0	0.0	0.0	0.0
SNORD46	94161	symbol	H. sapiens	94161	H. sapiens	SNORD46	small nucleolar RNA, C/D box 46	GO:0006396 RNA processing;GO:0016070 RNA metabolic process;GO:0010467 gene expression							0.0	0.0	0.0	0.0	0.0	0.0	0.0	0.0	0.0	0.0	0.0	0.0	0.0	0.0	0.0	0.0	0.0	0.0	0.0	0.0
MAN2B1	4125	symbol	H. sapiens	4125	H. sapiens	MAN2B1	mannosidase alpha class 2B member 1	GO:0006013 mannose metabolic process;GO:0006517 protein deglycosylation;GO:0019318 hexose metabolic process		Human disease related genes:Congenital disorders of metabolism:Lysosomal storage diseases; ENZYME proteins:Hydrolases; Disease related genes; Potential drug targets; Enzymes; Predicted intracellular proteins; Human disease related genes:Congenital disorders of metabolism:Congenital disorders of glycan/glycoprotein metabolism	Nucleoplasm;Vesicles (Approved)				0.0	0.0	0.0	0.0	0.0	0.0	0.0	0.0	0.0	0.0	0.0	0.0	0.0	0.0	0.0	0.0	0.0	0.0	0.0	0.0
MDP1	145553	symbol	H. sapiens	145553	H. sapiens	MDP1	magnesium dependent phosphatase 1	GO:0035335 peptidyl-tyrosine dephosphorylation;GO:0006470 protein dephosphorylation;GO:0016311 dephosphorylation		Enzymes; ENZYME proteins:Hydrolases; Predicted intracellular proteins	Nucleoplasm (Approved)				0.0	0.0	0.0	0.0	0.0	0.0	0.0	0.0	0.0	0.0	0.0	0.0	0.0	0.0	0.0	0.0	0.0	0.0	0.0	0.0
PHLDB3	653583	symbol	H. sapiens	653583	H. sapiens	PHLDB3	pleckstrin homology like domain family B member 3			Predicted intracellular proteins	Nuclear speckles (Approved); Additional: Cytosol;Plasma membrane				0.0	0.0	0.0	0.0	0.0	0.0	0.0	0.0	0.0	0.0	0.0	0.0	0.0	0.0	0.0	0.0	0.0	0.0	0.0	0.0
CD302	9936	symbol	H. sapiens	9936	H. sapiens	CD302	CD302 molecule	GO:0006909 phagocytosis;GO:0016192 vesicle-mediated transport;GO:0006810 transport		CD markers				(M5905)HALLMARK ADIPOGENESIS	0.0	0.0	0.0	0.0	0.0	0.0	0.0	0.0	0.0	0.0	0.0	0.0	0.0	0.0	0.0	0.0	0.0	0.0	0.0	0.0
SCN5A	6331	symbol	H. sapiens	6331	H. sapiens	SCN5A	sodium voltage-gated channel alpha subunit 5	GO:0098912 membrane depolarization during atrial cardiac muscle cell action potential;GO:0086048 membrane depolarization during bundle of His cell action potential;GO:0086017 Purkinje myocyte action potential		FDA approved drug targets:Small molecule drugs; Predicted intracellular proteins; Voltage-gated ion channels:Voltage-Gated Sodium Channels; Disease related genes; Transporters:Transporter channels and pores; Human disease related genes:Cardiovascular diseases:Cardiac diseases	Plasma membrane (Supported); Additional: Nucleoli;Nucleoplasm	Indecainide; Phenytoin; Disopyramide; Lidocaine; Mexiletine; Hexylcaine; Cinchocaine; Mephenytoin; Moricizine; Riluzole; Prilocaine; Ethotoin; Benzonatate; Quinidine; Zonisamide; Procainamide; Tocainide; Propafenone; Flecainide; Encainide; Fosphenytoin; Quinidine barbiturate; Ajmaline; Aprindine; Dronedarone; Vernakalant; Isavuconazole			0.0	0.0	0.0	0.0	0.0	0.0	1.0	0.0	0.0	0.0	0.0	0.0	0.0	0.0	0.0	1.0	0.0	0.0	0.0	0.0
PRRT3	285368	symbol	H. sapiens	285368	H. sapiens	PRRT3	proline rich transmembrane protein 3			Predicted intracellular proteins	Plasma membrane (Approved); Additional: Nucleoplasm				0.0	0.0	0.0	0.0	0.0	0.0	0.0	0.0	0.0	0.0	0.0	0.0	0.0	0.0	0.0	0.0	0.0	0.0	0.0	0.0
SARM1	23098	symbol	H. sapiens	23098	H. sapiens	SARM1	sterile alpha and TIR motif containing 1	GO:0034128 negative regulation of MyD88-independent toll-like receptor signaling pathway;GO:0034127 regulation of MyD88-independent toll-like receptor signaling pathway;GO:0019677 NAD catabolic process		Enzymes; ENZYME proteins:Hydrolases; Predicted intracellular proteins	Mitochondria (Supported)				0.0	0.0	0.0	0.0	0.0	0.0	0.0	0.0	0.0	0.0	0.0	0.0	0.0	0.0	1.0	0.0	0.0	0.0	0.0	0.0
MTCL1	23255	symbol	H. sapiens	23255	H. sapiens	MTCL1	microtubule crosslinking factor 1	GO:0090314 positive regulation of protein targeting to membrane;GO:0090313 regulation of protein targeting to membrane;GO:0045197 establishment or maintenance of epithelial cell apical/basal polarity		Predicted intracellular proteins					0.0	0.0	0.0	0.0	0.0	0.0	0.0	0.0	0.0	0.0	0.0	0.0	0.0	0.0	0.0	0.0	0.0	0.0	0.0	0.0
TRIM67	440730	symbol	H. sapiens	440730	H. sapiens	TRIM67	tripartite motif containing 67	GO:0046580 negative regulation of Ras protein signal transduction;GO:0051058 negative regulation of small GTPase mediated signal transduction;GO:2000060 positive regulation of ubiquitin-dependent protein catabolic process		Predicted intracellular proteins					0.0	0.0	0.0	0.0	0.0	0.0	0.0	0.0	0.0	0.0	1.0	0.0	0.0	0.0	0.0	0.0	0.0	0.0	0.0	0.0
XPNPEP3	63929	symbol	H. sapiens	63929	H. sapiens	XPNPEP3	X-prolyl aminopeptidase 3	GO:0003094 glomerular filtration;GO:0097205 renal filtration;GO:0003014 renal system process		ENZYME proteins:Hydrolases; Human disease related genes:Congenital malformations:Congenital malformations of the urinary system; Peptidases:Metallopeptidases; Disease related genes; Potential drug targets; Enzymes; Predicted intracellular proteins	Mitochondria (Supported); Additional: Cytosol				0.0	0.0	0.0	0.0	0.0	0.0	0.0	0.0	0.0	0.0	0.0	0.0	0.0	0.0	0.0	0.0	0.0	0.0	0.0	0.0
GTF2H2B	653238	symbol	H. sapiens	653238	H. sapiens	GTF2H2B	general transcription factor IIH subunit 2B (pseudogene)								0.0	0.0	0.0	0.0	0.0	0.0	0.0	0.0	0.0	0.0	0.0	0.0	0.0	0.0	0.0	0.0	0.0	0.0	0.0	0.0
GDF5	8200	symbol	H. sapiens	8200	H. sapiens	GDF5	growth differentiation factor 5	GO:0060591 chondroblast differentiation;GO:0043932 ossification involved in bone remodeling;GO:2001054 negative regulation of mesenchymal cell apoptotic process		Human disease related genes:Congenital malformations:Congenital malformations of the musculoskeletal system; Predicted secreted proteins; Disease related genes			(M5883)NABA SECRETED FACTORS; (M5885)NABA MATRISOME ASSOCIATED; (M5889)NABA MATRISOME		1.0	0.0	0.0	0.0	0.0	0.0	0.0	0.0	0.0	1.0	0.0	0.0	0.0	1.0	1.0	0.0	0.0	0.0	0.0	0.0
SNORA84	100124534	symbol	H. sapiens	100124534	H. sapiens	SNORA84	small nucleolar RNA, H/ACA box 84	GO:0006396 RNA processing;GO:0016070 RNA metabolic process;GO:0010467 gene expression							0.0	0.0	0.0	0.0	0.0	0.0	0.0	0.0	0.0	0.0	0.0	0.0	0.0	0.0	0.0	0.0	0.0	0.0	0.0	0.0
SPTBN2	6712	symbol	H. sapiens	6712	H. sapiens	SPTBN2	spectrin beta, non-erythrocytic 2	GO:0021692 cerebellar Purkinje cell layer morphogenesis;GO:0021680 cerebellar Purkinje cell layer development;GO:0021696 cerebellar cortex morphogenesis		Predicted intracellular proteins; Human disease related genes:Nervous system diseases:Neurodegenerative diseases; Disease related genes	Cytosol;Plasma membrane (Supported); Additional: Vesicles			(M5956)HALLMARK KRAS SIGNALING DN	0.0	0.0	0.0	0.0	0.0	0.0	0.0	0.0	0.0	0.0	0.0	0.0	0.0	0.0	0.0	1.0	0.0	0.0	0.0	0.0
MOCS3	27304	symbol	H. sapiens	27304	H. sapiens	MOCS3	molybdenum cofactor synthesis 3	GO:0002143 tRNA wobble position uridine thiolation;GO:0032447 protein urmylation;GO:0034227 tRNA thio-modification		Enzymes; Predicted intracellular proteins; ENZYME proteins:Transferases					1.0	0.0	0.0	0.0	0.0	0.0	0.0	0.0	0.0	0.0	0.0	0.0	0.0	0.0	0.0	0.0	0.0	0.0	0.0	0.0
PRKX	5613	symbol	H. sapiens	5613	H. sapiens	PRKX	protein kinase X-linked	GO:2000696 regulation of epithelial cell differentiation involved in kidney development;GO:0001935 endothelial cell proliferation;GO:0043542 endothelial cell migration	AGC Ser/Thr protein kinase family	Disease related genes; Potential drug targets; Enzymes; Kinases:AGC Ser/Thr protein kinases; Predicted intracellular proteins; ENZYME proteins:Transferases	Nucleoplasm (Supported)				0.0	0.0	0.0	0.0	0.0	0.0	0.0	0.0	0.0	0.0	0.0	1.0	0.0	0.0	0.0	0.0	0.0	0.0	0.0	0.0
ARHGEF18	23370	symbol	H. sapiens	23370	H. sapiens	ARHGEF18	Rho/Rac guanine nucleotide exchange factor 18	GO:0150105 protein localization to cell-cell junction;GO:0051497 negative regulation of stress fiber assembly;GO:0032232 negative regulation of actin filament bundle assembly		Human disease related genes:Nervous system diseases:Eye disease; Predicted intracellular proteins; Disease related genes	Cytosol (Enhanced)		(M68)PID RHOA REG PATHWAY		1.0	0.0	0.0	0.0	0.0	0.0	0.0	0.0	0.0	0.0	0.0	0.0	0.0	0.0	0.0	0.0	0.0	0.0	0.0	0.0
ST6GAL2	84620	symbol	H. sapiens	84620	H. sapiens	ST6GAL2	ST6 beta-galactoside alpha-2,6-sialyltransferase 2	GO:0097503 sialylation;GO:0009311 oligosaccharide metabolic process;GO:0006486 protein glycosylation		Enzymes; Predicted intracellular proteins; ENZYME proteins:Transferases	Nucleoli fibrillar center (Approved); Additional: Nucleoplasm				0.0	0.0	0.0	0.0	0.0	0.0	0.0	0.0	0.0	0.0	0.0	0.0	0.0	0.0	0.0	0.0	0.0	0.0	0.0	0.0
MAPK11	5600	symbol	H. sapiens	5600	H. sapiens	MAPK11	mitogen-activated protein kinase 11	GO:0038066 p38MAPK cascade;GO:0060044 negative regulation of cardiac muscle cell proliferation;GO:0055022 negative regulation of cardiac muscle tissue growth	CMGC Ser/Thr protein kinase family	FDA approved drug targets:Small molecule drugs; Kinases:CMGC Ser/Thr protein kinases; Enzymes; Predicted intracellular proteins; ENZYME proteins:Transferases	Mitochondria (Approved)	KC706; Regorafenib	(M199)PID P38 MK2 PATHWAY; (M274)PID LYMPH ANGIOGENESIS PATHWAY; (M20)PID P38 MKK3 6PATHWAY	(M5915)HALLMARK APICAL JUNCTION	1.0	0.0	1.0	0.0	0.0	1.0	0.0	1.0	1.0	1.0	0.0	0.0	0.0	0.0	0.0	0.0	0.0	0.0	0.0	0.0
NAT14	57106	symbol	H. sapiens	57106	H. sapiens	NAT14	N-acetyltransferase 14 (putative)	GO:0006352 DNA-templated transcription, initiation;GO:0006351 transcription, DNA-templated;GO:0097659 nucleic acid-templated transcription		Predicted intracellular proteins	Mitochondria (Approved)				1.0	0.0	0.0	0.0	0.0	0.0	0.0	0.0	0.0	0.0	0.0	0.0	0.0	0.0	0.0	0.0	0.0	0.0	0.0	0.0
RAB11FIP4	84440	symbol	H. sapiens	84440	H. sapiens	RAB11FIP4	RAB11 family interacting protein 4	GO:0032456 endocytic recycling;GO:0032465 regulation of cytokinesis;GO:0098876 vesicle-mediated transport to the plasma membrane		Predicted intracellular proteins					0.0	0.0	0.0	0.0	0.0	0.0	0.0	0.0	0.0	0.0	0.0	0.0	0.0	0.0	0.0	0.0	0.0	0.0	0.0	0.0
SLC35F3	148641	symbol	H. sapiens	148641	H. sapiens	SLC35F3	solute carrier family 35 member F3	GO:0015888 thiamine transport;GO:0015695 organic cation transport;GO:0051180 vitamin transport		Transporters:Electrochemical Potential-driven transporters	Golgi apparatus (Approved); Additional: Nucleoli				0.0	0.0	0.0	0.0	0.0	0.0	0.0	0.0	0.0	0.0	0.0	0.0	0.0	0.0	0.0	0.0	0.0	0.0	0.0	0.0
PIAS4	51588	symbol	H. sapiens	51588	H. sapiens	PIAS4	protein inhibitor of activated STAT 4	GO:0060887 limb epidermis development;GO:1902174 positive regulation of keratinocyte apoptotic process;GO:1902172 regulation of keratinocyte apoptotic process		Enzymes; Predicted intracellular proteins; ENZYME proteins:Transferases	Nucleoplasm (Supported); Additional: Centrosome		(M228)PID SMAD2 3PATHWAY; (M161)PID IFNG PATHWAY; (M58)PID AR PATHWAY		1.0	0.0	0.0	0.0	1.0	0.0	0.0	0.0	0.0	0.0	0.0	0.0	0.0	1.0	0.0	0.0	0.0	0.0	0.0	0.0
SLFNL1-AS1	100507178	symbol	H. sapiens	100507178	H. sapiens	SLFNL1-AS1	SLFNL1 antisense RNA 1								0.0	0.0	0.0	0.0	0.0	0.0	0.0	0.0	0.0	0.0	0.0	0.0	0.0	0.0	0.0	0.0	0.0	0.0	0.0	0.0
APBA2	321	symbol	H. sapiens	321	H. sapiens	APBA2	amyloid beta precursor protein binding family A member 2	GO:0007268 chemical synaptic transmission;GO:0098916 anterograde trans-synaptic signaling;GO:0099537 trans-synaptic signaling		Transporters:Accessory Factors Involved in Transport; Predicted intracellular proteins	Golgi apparatus (Enhanced)				0.0	0.0	0.0	0.0	0.0	0.0	0.0	0.0	0.0	0.0	0.0	1.0	0.0	0.0	0.0	0.0	0.0	0.0	0.0	0.0
PTPN14	5784	symbol	H. sapiens	5784	H. sapiens	PTPN14	protein tyrosine phosphatase non-receptor type 14	GO:0001946 lymphangiogenesis;GO:0036303 lymph vessel morphogenesis;GO:0001945 lymph vessel development		ENZYME proteins:Hydrolases; Human disease related genes:Congenital malformations:Congenital malformations of skin; Disease related genes; Potential drug targets; Enzymes; Predicted intracellular proteins	Nucleoplasm (Supported)			(M5939)HALLMARK P53 PATHWAY	0.0	0.0	1.0	0.0	0.0	0.0	0.0	0.0	0.0	0.0	0.0	0.0	0.0	0.0	0.0	0.0	0.0	0.0	0.0	0.0
PPM1K	152926	symbol	H. sapiens	152926	H. sapiens	PPM1K	protein phosphatase, Mg2+/Mn2+ dependent 1K	GO:0006470 protein dephosphorylation;GO:0016311 dephosphorylation;GO:0006796 phosphate-containing compound metabolic process		ENZYME proteins:Hydrolases; Human disease related genes:Congenital disorders of metabolism:Congenital disorders of amino acid metabolism; Disease related genes; Potential drug targets; Enzymes; Predicted intracellular proteins	Mitochondria (Supported)				0.0	0.0	0.0	0.0	0.0	0.0	0.0	1.0	0.0	0.0	0.0	0.0	0.0	0.0	0.0	0.0	0.0	0.0	0.0	0.0
ST3GAL5	8869	symbol	H. sapiens	8869	H. sapiens	ST3GAL5	ST3 beta-galactoside alpha-2,3-sialyltransferase 5	GO:0001574 ganglioside biosynthetic process;GO:0097503 sialylation;GO:0001573 ganglioside metabolic process		Human disease related genes:Nervous system diseases:Epilepsy; ENZYME proteins:Transferases; Disease related genes; Potential drug targets; Enzymes; Predicted intracellular proteins; Human disease related genes:Congenital disorders of metabolism:Congenital disorders of glycan/glycoprotein metabolism	Vesicles (Approved)	99mTc-14 F7 Mab		(M5913)HALLMARK INTERFERON GAMMA RESPONSE	0.0	0.0	0.0	0.0	0.0	0.0	0.0	1.0	0.0	0.0	0.0	0.0	0.0	0.0	0.0	0.0	0.0	0.0	0.0	0.0
HIST3H2BB	128312	gene_synonym	H. sapiens	128312	H. sapiens	H2BU1	H2B.U histone 1	GO:0006334 nucleosome assembly;GO:0031497 chromatin assembly;GO:0034728 nucleosome organization		Predicted intracellular proteins	Nucleoplasm (Approved); Additional: Cytosol				1.0	1.0	0.0	1.0	0.0	0.0	0.0	0.0	0.0	0.0	0.0	0.0	0.0	0.0	0.0	0.0	0.0	0.0	0.0	0.0
LOC100129046	100129046	Gene_ID	H. sapiens	100129046	H. sapiens	BCAR3-AS1	BCAR3 antisense RNA 1								0.0	0.0	0.0	0.0	0.0	0.0	0.0	0.0	0.0	0.0	0.0	0.0	0.0	0.0	0.0	0.0	0.0	0.0	0.0	0.0
SNORA71B	26776	symbol	H. sapiens	26776	H. sapiens	SNORA71B	small nucleolar RNA, H/ACA box 71B	GO:0006396 RNA processing;GO:0016070 RNA metabolic process;GO:0010467 gene expression							0.0	0.0	0.0	0.0	0.0	0.0	0.0	0.0	0.0	0.0	0.0	0.0	0.0	0.0	0.0	0.0	0.0	0.0	0.0	0.0
SSC4D	136853	symbol	H. sapiens	136853	H. sapiens	SSC4D	scavenger receptor cysteine rich family member with 4 domains	GO:0006897 endocytosis;GO:0016192 vesicle-mediated transport;GO:0006810 transport		Predicted secreted proteins					0.0	0.0	0.0	0.0	0.0	0.0	0.0	0.0	0.0	0.0	0.0	0.0	0.0	0.0	0.0	0.0	0.0	0.0	0.0	0.0
PLEKHG6	55200	symbol	H. sapiens	55200	H. sapiens	PLEKHG6	pleckstrin homology and RhoGEF domain containing G6	GO:0051056 regulation of small GTPase mediated signal transduction;GO:1902531 regulation of intracellular signal transduction;GO:0050790 regulation of catalytic activity		Predicted intracellular proteins	Cell Junctions (Supported); Additional: Centrosome		(M68)PID RHOA REG PATHWAY		1.0	0.0	0.0	0.0	0.0	0.0	0.0	0.0	0.0	0.0	0.0	0.0	0.0	0.0	0.0	0.0	0.0	0.0	0.0	0.0
MTHFD2L	441024	symbol	H. sapiens	441024	H. sapiens	MTHFD2L	methylenetetrahydrofolate dehydrogenase (NADP+ dependent) 2 like	GO:0000105 histidine biosynthetic process;GO:0009256 10-formyltetrahydrofolate metabolic process;GO:0035999 tetrahydrofolate interconversion		Enzymes; ENZYME proteins:Hydrolases; Predicted intracellular proteins; ENZYME proteins:Oxidoreductases				(M5924)HALLMARK MTORC1 SIGNALING	1.0	0.0	0.0	0.0	0.0	0.0	0.0	1.0	0.0	0.0	0.0	0.0	0.0	0.0	0.0	0.0	1.0	0.0	0.0	0.0
ALX3	257	symbol	H. sapiens	257	H. sapiens	ALX3	ALX homeobox 3	GO:0035116 embryonic hindlimb morphogenesis;GO:0035115 embryonic forelimb morphogenesis;GO:0035137 hindlimb morphogenesis		Human disease related genes:Congenital malformations:Congenital malformations of the musculoskeletal system; Transcription factors:Helix-turn-helix domains; Predicted intracellular proteins; Disease related genes	Nucleoli fibrillar center (Approved)				0.0	0.0	0.0	0.0	0.0	0.0	0.0	0.0	0.0	0.0	0.0	0.0	0.0	1.0	0.0	0.0	0.0	0.0	0.0	0.0
OGFOD3	79701	symbol	H. sapiens	79701	H. sapiens	OGFOD3	2-oxoglutarate and iron dependent oxygenase domain containing 3			Predicted intracellular proteins	Nucleoplasm (Approved)				0.0	0.0	0.0	0.0	0.0	0.0	0.0	0.0	0.0	0.0	0.0	0.0	0.0	0.0	0.0	0.0	0.0	0.0	0.0	0.0
CCDC106	29903	symbol	H. sapiens	29903	H. sapiens	CCDC106	coiled-coil domain containing 106			Predicted intracellular proteins	Nucleoplasm (Supported); Additional: Cytosol			(M5956)HALLMARK KRAS SIGNALING DN	0.0	0.0	0.0	0.0	0.0	0.0	0.0	0.0	0.0	0.0	0.0	0.0	0.0	0.0	0.0	0.0	0.0	0.0	0.0	0.0
MEX3D	399664	symbol	H. sapiens	399664	H. sapiens	MEX3D	mex-3 RNA binding family member D	GO:0010609 mRNA localization resulting in posttranscriptional regulation of gene expression;GO:0008298 intracellular mRNA localization;GO:0061157 mRNA destabilization		Predicted intracellular proteins					0.0	0.0	0.0	0.0	0.0	0.0	0.0	0.0	0.0	0.0	1.0	0.0	0.0	0.0	0.0	0.0	0.0	0.0	0.0	0.0
ACVR1C	130399	symbol	H. sapiens	130399	H. sapiens	ACVR1C	activin A receptor type 1C	GO:1901383 negative regulation of chorionic trophoblast cell proliferation;GO:0001834 trophectodermal cell proliferation;GO:1901382 regulation of chorionic trophoblast cell proliferation	TKL Ser/Thr protein kinase family	Enzymes; Predicted intracellular proteins; Kinases:TKL Ser/Thr protein kinases; ENZYME proteins:Transferases					0.0	0.0	0.0	0.0	0.0	0.0	0.0	0.0	1.0	0.0	0.0	0.0	0.0	0.0	0.0	0.0	0.0	0.0	0.0	0.0
MTMR4	9110	symbol	H. sapiens	9110	H. sapiens	MTMR4	myotubularin related protein 4	GO:0060304 regulation of phosphatidylinositol dephosphorylation;GO:0046856 phosphatidylinositol dephosphorylation;GO:1903725 regulation of phospholipid metabolic process		Enzymes; ENZYME proteins:Hydrolases; Predicted intracellular proteins					0.0	0.0	0.0	0.0	0.0	0.0	0.0	0.0	0.0	0.0	0.0	0.0	0.0	0.0	0.0	0.0	0.0	0.0	0.0	0.0
HES4	57801	symbol	H. sapiens	57801	H. sapiens	HES4	hes family bHLH transcription factor 4	GO:0009952 anterior/posterior pattern specification;GO:0003002 regionalization;GO:0007389 pattern specification process		Transcription factors:Basic domains; Predicted intracellular proteins	Nucleoplasm (Approved); Additional: Cytosol;Vesicles				0.0	0.0	0.0	0.0	0.0	0.0	0.0	0.0	0.0	0.0	0.0	0.0	0.0	0.0	0.0	0.0	0.0	0.0	0.0	0.0
PLAC4	191585	symbol	H. sapiens	191585	H. sapiens	PLAC4	placenta enriched 4								0.0	0.0	0.0	0.0	0.0	0.0	0.0	0.0	0.0	0.0	0.0	0.0	0.0	0.0	0.0	0.0	0.0	0.0	0.0	0.0
TPBG	7162	symbol	H. sapiens	7162	H. sapiens	TPBG	trophoblast glycoprotein	GO:0008355 olfactory learning;GO:0090497 mesenchymal cell migration;GO:0042048 olfactory behavior			Nucleoplasm (Approved)			(M5891)HALLMARK HYPOXIA; (M5906)HALLMARK ESTROGEN RESPONSE EARLY; (M5907)HALLMARK ESTROGEN RESPONSE LATE	0.0	0.0	0.0	0.0	0.0	0.0	0.0	0.0	0.0	1.0	0.0	0.0	0.0	0.0	0.0	0.0	0.0	1.0	0.0	0.0
PDCD2L	84306	symbol	H. sapiens	84306	H. sapiens	PDCD2L	programmed cell death 2 like	GO:0007049 cell cycle;GO:0009987 cellular process;GO:0008150 biological_process		Predicted intracellular proteins; Cancer-related genes:Mutated cancer genes	Mitochondria (Approved)			(M5947)HALLMARK IL2 STAT5 SIGNALING	0.0	0.0	0.0	0.0	0.0	0.0	0.0	0.0	0.0	0.0	0.0	0.0	0.0	0.0	0.0	0.0	0.0	0.0	0.0	0.0
MRPL14	64928	symbol	H. sapiens	64928	H. sapiens	MRPL14	mitochondrial ribosomal protein L14			Ribosomal proteins; Predicted intracellular proteins	Mitochondria (Supported)				0.0	0.0	0.0	0.0	0.0	0.0	0.0	0.0	0.0	0.0	0.0	0.0	0.0	0.0	0.0	0.0	0.0	0.0	0.0	0.0
NKD2	85409	symbol	H. sapiens	85409	H. sapiens	NKD2	NKD inhibitor of WNT signaling pathway 2	GO:0048210 Golgi vesicle fusion to target membrane;GO:0010954 positive regulation of protein processing;GO:1903319 positive regulation of protein maturation		Predicted intracellular proteins			(M90)PID WNT CANONICAL PATHWAY		0.0	0.0	0.0	0.0	0.0	0.0	0.0	0.0	1.0	1.0	1.0	0.0	0.0	0.0	0.0	0.0	0.0	0.0	0.0	0.0
SMG1P5	595101	symbol	H. sapiens	595101	H. sapiens	SMG1P5	SMG1 pseudogene 5								0.0	0.0	0.0	0.0	0.0	0.0	0.0	0.0	0.0	0.0	0.0	0.0	0.0	0.0	0.0	0.0	0.0	0.0	0.0	0.0
ATP6V0E2	155066	symbol	H. sapiens	155066	H. sapiens	ATP6V0E2	ATPase H+ transporting V0 subunit e2	GO:0007035 vacuolar acidification;GO:0051452 intracellular pH reduction;GO:0045851 pH reduction							1.0	0.0	0.0	0.0	0.0	0.0	0.0	0.0	0.0	0.0	0.0	0.0	0.0	0.0	0.0	0.0	0.0	0.0	0.0	0.0
RNF135	84282	symbol	H. sapiens	84282	H. sapiens	RNF135	ring finger protein 135	GO:0010994 free ubiquitin chain polymerization;GO:0039529 RIG-I signaling pathway;GO:0010992 ubiquitin recycling		Enzymes; Human disease related genes:Congenital malformations:Other congenital malformations; Predicted intracellular proteins; ENZYME proteins:Transferases	Vesicles (Approved)				0.0	1.0	0.0	0.0	0.0	0.0	0.0	0.0	0.0	0.0	0.0	0.0	0.0	0.0	0.0	0.0	0.0	0.0	0.0	0.0
POU3F3	5455	symbol	H. sapiens	5455	H. sapiens	POU3F3	POU class 3 homeobox 3	GO:0072024 macula densa development;GO:0072051 juxtaglomerular apparatus development;GO:0072206 metanephric juxtaglomerular apparatus development		Transcription factors:Helix-turn-helix domains; Predicted intracellular proteins; Human disease related genes:Other diseases:Mental and behavioural disorders; Disease related genes	Nucleoplasm (Enhanced)				0.0	0.0	0.0	0.0	0.0	0.0	0.0	0.0	0.0	0.0	0.0	0.0	0.0	0.0	0.0	1.0	0.0	0.0	0.0	0.0
GTF3C1	2975	symbol	H. sapiens	2975	H. sapiens	GTF3C1	general transcription factor IIIC subunit 1	GO:0042791 5S class rRNA transcription by RNA polymerase III;GO:0042797 tRNA transcription by RNA polymerase III;GO:0006384 transcription initiation from RNA polymerase III promoter		Predicted intracellular proteins	Nucleoli;Nucleoplasm (Approved)				1.0	0.0	0.0	0.0	0.0	0.0	0.0	0.0	0.0	0.0	0.0	0.0	0.0	0.0	0.0	0.0	0.0	0.0	0.0	0.0
LINC01521	54944	symbol	H. sapiens	54944	H. sapiens	LINC01521	long intergenic non-protein coding RNA 1521								0.0	0.0	0.0	0.0	0.0	0.0	0.0	0.0	0.0	0.0	0.0	0.0	0.0	0.0	0.0	0.0	0.0	0.0	0.0	0.0
BOP1	23246	symbol	H. sapiens	23246	H. sapiens	BOP1	BOP1 ribosomal biogenesis factor	GO:0000448 cleavage in ITS2 between 5.8S rRNA and LSU-rRNA of tricistronic rRNA transcript (SSU-rRNA, 5.8S rRNA, LSU-rRNA);GO:0000463 maturation of LSU-rRNA from tricistronic rRNA transcript (SSU-rRNA, 5.8S rRNA, LSU-rRNA);GO:0000478 endonucleolytic cleavage involved in rRNA processing		Predicted intracellular proteins	Nucleoli;Nucleoli rim (Enhanced); Additional: Mitotic chromosome;Nucleoplasm				0.0	0.0	0.0	0.0	0.0	0.0	0.0	1.0	0.0	0.0	0.0	0.0	0.0	0.0	0.0	0.0	0.0	0.0	0.0	0.0
CYP26C1	340665	symbol	H. sapiens	340665	H. sapiens	CYP26C1	cytochrome P450 family 26 subfamily C member 1	GO:0016103 diterpenoid catabolic process;GO:0034653 retinoic acid catabolic process;GO:0048387 negative regulation of retinoic acid receptor signaling pathway		Human disease related genes:Congenital malformations:Congenital malformations of skin; Disease related genes		Alitretinoin; Tretinoin			1.0	0.0	0.0	0.0	0.0	0.0	0.0	0.0	0.0	0.0	0.0	0.0	1.0	0.0	0.0	0.0	0.0	0.0	0.0	0.0
RPL13AP6	644511	symbol	H. sapiens	644511	H. sapiens	RPL13AP6	ribosomal protein L13a pseudogene 6								0.0	0.0	0.0	0.0	0.0	0.0	0.0	0.0	0.0	0.0	0.0	0.0	0.0	0.0	0.0	0.0	0.0	0.0	0.0	0.0
SMO	6608	symbol	H. sapiens	6608	H. sapiens	SMO	smoothened, frizzled class receptor	GO:0007371 ventral midline determination;GO:0072036 mesenchymal to epithelial transition involved in renal vesicle formation;GO:0072285 mesenchymal to epithelial transition involved in metanephric renal vesicle formation		Transporters; FDA approved drug targets:Small molecule drugs; Human disease related genes:Cancers:Cancers of eye, brain, and central nervous system; G-protein coupled receptors:Family fz/smo receptors; Disease related genes; G-protein coupled receptors:GPCRs excl olfactory receptors; Cancer-related genes; Human disease related genes:Cancers:Skin cancers		Fluocinonide; Halcinonide; Vismodegib; Sonidegib; Glasdegib	(M211)PID HEDGEHOG 2PATHWAY; (M219)PID HEDGEHOG GLI PATHWAY		1.0	0.0	0.0	0.0	0.0	0.0	1.0	0.0	1.0	1.0	0.0	0.0	1.0	0.0	0.0	1.0	0.0	0.0	0.0	0.0
LOC100507156	100507156	Gene_ID	H. sapiens	100507156	H. sapiens	LOC100507156	uncharacterized LOC100507156								0.0	0.0	0.0	0.0	0.0	0.0	0.0	0.0	0.0	0.0	0.0	0.0	0.0	0.0	0.0	0.0	0.0	0.0	0.0	0.0
ODC1	4953	symbol	H. sapiens	4953	H. sapiens	ODC1	ornithine decarboxylase 1	GO:0033387 putrescine biosynthetic process from ornithine;GO:0009446 putrescine biosynthetic process;GO:0009445 putrescine metabolic process		FDA approved drug targets:Small molecule drugs; Human disease related genes:Congenital malformations:Congenital malformations of the nervous system; ENZYME proteins:Lyases; Enzymes; Predicted intracellular proteins	Cytosol;Plasma membrane (Approved)	Pyridoxal phosphate; Spermine; Putrescine; Pyridoxine phosphate; N-Pyridoxyl-Glycine-5-Monophosphate; L-Eflornithine; N(6)-(pyridoxal phosphate)-L-lysine; Geneticin; Eflornithine	(M66)PID MYC ACTIV PATHWAY	(M5935)HALLMARK FATTY ACID METABOLISM; (M5947)HALLMARK IL2 STAT5 SIGNALING; (M5901)HALLMARK G2M CHECKPOINT	0.0	0.0	0.0	0.0	0.0	0.0	0.0	1.0	0.0	0.0	0.0	0.0	0.0	0.0	0.0	0.0	0.0	0.0	0.0	0.0
HIC1	3090	symbol	H. sapiens	3090	H. sapiens	HIC1	HIC ZBTB transcriptional repressor 1	GO:0043517 positive regulation of DNA damage response, signal transduction by p53 class mediator;GO:1901798 positive regulation of signal transduction by p53 class mediator;GO:0043516 regulation of DNA damage response, signal transduction by p53 class mediator		Predicted intracellular proteins; Transcription factors:Zinc-coordinating DNA-binding domains			(M40)PID E2F PATHWAY; (M145)PID P53 DOWNSTREAM PATHWAY		1.0	0.0	0.0	0.0	0.0	0.0	0.0	0.0	0.0	1.0	0.0	0.0	0.0	0.0	0.0	0.0	0.0	0.0	0.0	0.0
EXOSC6	118460	symbol	H. sapiens	118460	H. sapiens	EXOSC6	exosome component 6	GO:0071051 polyadenylation-dependent snoRNA 3'-end processing;GO:0034475 U4 snRNA 3'-end processing;GO:0034427 nuclear-transcribed mRNA catabolic process, exonucleolytic, 3'-5'		Predicted intracellular proteins					1.0	0.0	0.0	0.0	0.0	0.0	0.0	1.0	0.0	0.0	0.0	0.0	0.0	0.0	0.0	0.0	0.0	0.0	0.0	0.0
ZNF787	126208	symbol	H. sapiens	126208	H. sapiens	ZNF787	zinc finger protein 787	GO:0006357 regulation of transcription by RNA polymerase II;GO:0006355 regulation of transcription, DNA-templated;GO:1903506 regulation of nucleic acid-templated transcription		Predicted intracellular proteins	Nucleoplasm (Approved); Additional: Mitochondria;Nucleoli				0.0	0.0	0.0	0.0	0.0	0.0	0.0	0.0	0.0	0.0	0.0	0.0	0.0	0.0	0.0	0.0	0.0	0.0	0.0	0.0
MIR6087						None	None	None	None	None	None	None	None	None	nan	nan	nan	nan	nan	nan	nan	nan	nan	nan	nan	nan	nan	nan	nan	nan	nan	nan	nan	nan
FAM89A	375061	symbol	H. sapiens	375061	H. sapiens	FAM89A	family with sequence similarity 89 member A			Predicted intracellular proteins	Golgi apparatus;Vesicles (Approved); Additional: Nucleoplasm				0.0	0.0	0.0	0.0	0.0	0.0	0.0	0.0	0.0	0.0	0.0	0.0	0.0	0.0	0.0	0.0	0.0	0.0	0.0	0.0
KLHL15	80311	symbol	H. sapiens	80311	H. sapiens	KLHL15	kelch like family member 15	GO:0071630 nuclear protein quality control by the ubiquitin-proteasome system;GO:2000042 negative regulation of double-strand break repair via homologous recombination;GO:0071218 cellular response to misfolded protein		Predicted intracellular proteins; Human disease related genes:Other diseases:Mental and behavioural disorders; Disease related genes	Cytosol (Approved); Additional: Aggresome				0.0	0.0	0.0	0.0	1.0	0.0	0.0	0.0	0.0	0.0	0.0	0.0	0.0	0.0	0.0	0.0	0.0	0.0	0.0	0.0
FAM60A	58516	gene_synonym	H. sapiens	58516	H. sapiens	SINHCAF	SIN3-HDAC complex associated factor	GO:0030336 negative regulation of cell migration;GO:2000146 negative regulation of cell motility;GO:0051271 negative regulation of cellular component movement		Predicted intracellular proteins	Nucleoplasm (Approved); Additional: Cytosol				1.0	0.0	0.0	0.0	0.0	0.0	0.0	0.0	0.0	0.0	0.0	0.0	0.0	0.0	0.0	0.0	0.0	0.0	0.0	0.0
GPSM1	26086	symbol	H. sapiens	26086	H. sapiens	GPSM1	G protein signaling modulator 1	GO:1905098 negative regulation of guanyl-nucleotide exchange factor activity;GO:1905097 regulation of guanyl-nucleotide exchange factor activity;GO:1904424 regulation of GTP binding		Predicted intracellular proteins	Golgi apparatus (Supported); Additional: Nucleoplasm				0.0	0.0	0.0	0.0	0.0	0.0	0.0	0.0	0.0	0.0	1.0	0.0	0.0	0.0	0.0	0.0	0.0	0.0	0.0	0.0
DLK1	8788	symbol	H. sapiens	8788	H. sapiens	DLK1	delta like non-canonical Notch ligand 1	GO:0045746 negative regulation of Notch signaling pathway;GO:0008593 regulation of Notch signaling pathway;GO:0009968 negative regulation of signal transduction		Predicted intracellular proteins	Golgi apparatus (Approved)		(M106)PID HNF3B PATHWAY; (M17)PID NOTCH PATHWAY		1.0	0.0	0.0	0.0	0.0	0.0	0.0	0.0	0.0	0.0	0.0	0.0	0.0	0.0	0.0	0.0	0.0	0.0	0.0	0.0

## Sheet: Enrichment
GroupID	Category	Term	Description	LogP	Log(q-value)	InTerm_InList	Genes	Symbols
1_Summary	Reactome Gene Sets	R-HSA-3214815	HDACs deacetylate histones	-58.8255	-54.4788	48/94	3012,3013,3017,3018,8294,8329,8330,8331,8332,8334,8335,8336,8338,8340,8341,8342,8345,8348,8349,8350,8351,8352,8353,8354,8355,8356,8357,8358,8359,8360,8361,8362,8364,8365,8366,8367,8368,8968,8969,8970,85235,85236,92815,121504,128312,317772,440689,653604,23633,1021,2353,4193,4194,4217,5600,23112,23466,26523,6314,27161,2354,2790,4915,9759,5605,23236,3006,3007,3008,3009,708,10098,81619,80312,8242,183…	H2AC8,H2AC7,H2BC5,H2BC3,H4C9,H2AC13,H2AC15,H2AC14,H2AC16,H2AC6,H2AC4,H2AC17,H2AC20,H2BC13,H2BC15,H2BC14,H2BC9,H2BC17,H2BC21,H3C1,H3C4,H3C3,H3C6,H3C11,H3C8,H3C12,H3C10,H3C2,H4C1,H4C4,H4C6,H4C12,H4C3,H4C8,H4C2,H4C5,H4C13,H3C7,H2AC11,H2BC11,H2AC12,H2BC12,H2AW,H4-16,H2BU1,H2AC21,H2BC18,H3C13,KPNA6,CDK6,FOS,MDM2,MDM4,MAP3K5,MAPK11,TNRC6B,CBX6,AGO1,ATXN7,AGO2,FOSB,GNG10,NTRK2,HDAC4,MAP2K2,PLCB1,H1-2,H1…
1_Member	Reactome Gene Sets	R-HSA-3214815	HDACs deacetylate histones	-58.8255	-54.4788	48/94	3012,3013,3017,3018,8294,8329,8330,8331,8332,8334,8335,8336,8338,8340,8341,8342,8345,8348,8349,8350,8351,8352,8353,8354,8355,8356,8357,8358,8359,8360,8361,8362,8364,8365,8366,8367,8368,8968,8969,8970,85235,85236,92815,121504,128312,317772,440689,653604	H2AC8,H2AC7,H2BC5,H2BC3,H4C9,H2AC13,H2AC15,H2AC14,H2AC16,H2AC6,H2AC4,H2AC17,H2AC20,H2BC13,H2BC15,H2BC14,H2BC9,H2BC17,H2BC21,H3C1,H3C4,H3C3,H3C6,H3C11,H3C8,H3C12,H3C10,H3C2,H4C1,H4C4,H4C6,H4C12,H4C3,H4C8,H4C2,H4C5,H4C13,H3C7,H2AC11,H2BC11,H2AC12,H2BC12,H2AW,H4-16,H2BU1,H2AC21,H2BC18,H3C13
1_Member	Reactome Gene Sets	R-HSA-9610379	HCMV Late Events	-53.1323	-49.0867	48/116	3012,3013,3017,3018,8294,8329,8330,8331,8332,8334,8335,8336,8338,8340,8341,8342,8345,8348,8349,8350,8351,8352,8353,8354,8355,8356,8357,8358,8359,8360,8361,8362,8364,8365,8366,8367,8368,8968,8969,8970,85235,85236,92815,121504,128312,317772,440689,653604	H2AC8,H2AC7,H2BC5,H2BC3,H4C9,H2AC13,H2AC15,H2AC14,H2AC16,H2AC6,H2AC4,H2AC17,H2AC20,H2BC13,H2BC15,H2BC14,H2BC9,H2BC17,H2BC21,H3C1,H3C4,H3C3,H3C6,H3C11,H3C8,H3C12,H3C10,H3C2,H4C1,H4C4,H4C6,H4C12,H4C3,H4C8,H4C2,H4C5,H4C13,H3C7,H2AC11,H2BC11,H2AC12,H2BC12,H2AW,H4-16,H2BU1,H2AC21,H2BC18,H3C13
1_Member	Reactome Gene Sets	R-HSA-73728	RNA Polymerase I Promoter Opening	-52.4619	-48.5923	39/63	3012,3013,3017,3018,8294,8331,8334,8335,8338,8340,8341,8342,8345,8348,8349,8350,8351,8352,8353,8354,8355,8356,8357,8358,8359,8360,8361,8362,8364,8365,8366,8367,8368,8968,8970,85236,121504,128312,653604	H2AC8,H2AC7,H2BC5,H2BC3,H4C9,H2AC14,H2AC6,H2AC4,H2AC20,H2BC13,H2BC15,H2BC14,H2BC9,H2BC17,H2BC21,H3C1,H3C4,H3C3,H3C6,H3C11,H3C8,H3C12,H3C10,H3C2,H4C1,H4C4,H4C6,H4C12,H4C3,H4C8,H4C2,H4C5,H4C13,H3C7,H2BC11,H2BC12,H4-16,H2BU1,H3C13
1_Member	Reactome Gene Sets	R-HSA-68616	Assembly of the ORC complex at the origin of replication	-52.1146	-48.3699	40/69	3012,3013,3017,3018,8294,8331,8334,8335,8338,8340,8341,8342,8345,8348,8349,8350,8351,8352,8353,8354,8355,8356,8357,8358,8359,8360,8361,8362,8364,8365,8366,8367,8368,8968,8970,23633,85236,121504,128312,653604	H2AC8,H2AC7,H2BC5,H2BC3,H4C9,H2AC14,H2AC6,H2AC4,H2AC20,H2BC13,H2BC15,H2BC14,H2BC9,H2BC17,H2BC21,H3C1,H3C4,H3C3,H3C6,H3C11,H3C8,H3C12,H3C10,H3C2,H4C1,H4C4,H4C6,H4C12,H4C3,H4C8,H4C2,H4C5,H4C13,H3C7,H2BC11,KPNA6,H2BC12,H4-16,H2BU1,H3C13
1_Member	Reactome Gene Sets	R-HSA-5334118	DNA methylation	-51.6692	-48.0215	39/65	3012,3013,3017,3018,8294,8331,8334,8335,8338,8340,8341,8342,8345,8348,8349,8350,8351,8352,8353,8354,8355,8356,8357,8358,8359,8360,8361,8362,8364,8365,8366,8367,8368,8968,8970,85236,121504,128312,653604	H2AC8,H2AC7,H2BC5,H2BC3,H4C9,H2AC14,H2AC6,H2AC4,H2AC20,H2BC13,H2BC15,H2BC14,H2BC9,H2BC17,H2BC21,H3C1,H3C4,H3C3,H3C6,H3C11,H3C8,H3C12,H3C10,H3C2,H4C1,H4C4,H4C6,H4C12,H4C3,H4C8,H4C2,H4C5,H4C13,H3C7,H2BC11,H2BC12,H4-16,H2BU1,H3C13
1_Member	Reactome Gene Sets	R-HSA-2559580	Oxidative Stress Induced Senescence	-51.2158	-47.6473	48/125	1021,2353,3012,3013,3017,3018,4193,4194,4217,5600,8294,8331,8334,8335,8338,8340,8341,8342,8345,8348,8349,8350,8351,8352,8353,8354,8355,8356,8357,8358,8359,8360,8361,8362,8364,8365,8366,8367,8368,8968,8970,23112,23466,26523,85236,121504,128312,653604	CDK6,FOS,H2AC8,H2AC7,H2BC5,H2BC3,MDM2,MDM4,MAP3K5,MAPK11,H4C9,H2AC14,H2AC6,H2AC4,H2AC20,H2BC13,H2BC15,H2BC14,H2BC9,H2BC17,H2BC21,H3C1,H3C4,H3C3,H3C6,H3C11,H3C8,H3C12,H3C10,H3C2,H4C1,H4C4,H4C6,H4C12,H4C3,H4C8,H4C2,H4C5,H4C13,H3C7,H2BC11,TNRC6B,CBX6,AGO1,H2BC12,H4-16,H2BU1,H3C13
1_Member	Reactome Gene Sets	R-HSA-5625886	Activated PKN1 stimulates transcription of AR (androgen receptor) regulated genes KLK2 and KLK3	-50.9157	-47.4141	39/67	3012,3013,3017,3018,8294,8331,8334,8335,8338,8340,8341,8342,8345,8348,8349,8350,8351,8352,8353,8354,8355,8356,8357,8358,8359,8360,8361,8362,8364,8365,8366,8367,8368,8968,8970,85236,121504,128312,653604	H2AC8,H2AC7,H2BC5,H2BC3,H4C9,H2AC14,H2AC6,H2AC4,H2AC20,H2BC13,H2BC15,H2BC14,H2BC9,H2BC17,H2BC21,H3C1,H3C4,H3C3,H3C6,H3C11,H3C8,H3C12,H3C10,H3C2,H4C1,H4C4,H4C6,H4C12,H4C3,H4C8,H4C2,H4C5,H4C13,H3C7,H2BC11,H2BC12,H4-16,H2BU1,H3C13
1_Member	Reactome Gene Sets	R-HSA-427359	SIRT1 negatively regulates rRNA expression	-50.5524	-47.1088	39/68	3012,3013,3017,3018,8294,8331,8334,8335,8338,8340,8341,8342,8345,8348,8349,8350,8351,8352,8353,8354,8355,8356,8357,8358,8359,8360,8361,8362,8364,8365,8366,8367,8368,8968,8970,85236,121504,128312,653604	H2AC8,H2AC7,H2BC5,H2BC3,H4C9,H2AC14,H2AC6,H2AC4,H2AC20,H2BC13,H2BC15,H2BC14,H2BC9,H2BC17,H2BC21,H3C1,H3C4,H3C3,H3C6,H3C11,H3C8,H3C12,H3C10,H3C2,H4C1,H4C4,H4C6,H4C12,H4C3,H4C8,H4C2,H4C5,H4C13,H3C7,H2BC11,H2BC12,H4-16,H2BU1,H3C13
1_Member	Reactome Gene Sets	R-HSA-3214847	HATs acetylate histones	-49.565	-46.1725	49/142	3012,3013,3017,3018,6314,8294,8329,8330,8331,8332,8334,8335,8336,8338,8340,8341,8342,8345,8348,8349,8350,8351,8352,8353,8354,8355,8356,8357,8358,8359,8360,8361,8362,8364,8365,8366,8367,8368,8968,8969,8970,85235,85236,92815,121504,128312,317772,440689,653604	H2AC8,H2AC7,H2BC5,H2BC3,ATXN7,H4C9,H2AC13,H2AC15,H2AC14,H2AC16,H2AC6,H2AC4,H2AC17,H2AC20,H2BC13,H2BC15,H2BC14,H2BC9,H2BC17,H2BC21,H3C1,H3C4,H3C3,H3C6,H3C11,H3C8,H3C12,H3C10,H3C2,H4C1,H4C4,H4C6,H4C12,H4C3,H4C8,H4C2,H4C5,H4C13,H3C7,H2AC11,H2BC11,H2AC12,H2BC12,H2AW,H4-16,H2BU1,H2AC21,H2BC18,H3C13
1_Member	Reactome Gene Sets	R-HSA-9609690	HCMV Early Events	-49.2896	-45.9429	48/135	3012,3013,3017,3018,8294,8329,8330,8331,8332,8334,8335,8336,8338,8340,8341,8342,8345,8348,8349,8350,8351,8352,8353,8354,8355,8356,8357,8358,8359,8360,8361,8362,8364,8365,8366,8367,8368,8968,8969,8970,85235,85236,92815,121504,128312,317772,440689,653604	H2AC8,H2AC7,H2BC5,H2BC3,H4C9,H2AC13,H2AC15,H2AC14,H2AC16,H2AC6,H2AC4,H2AC17,H2AC20,H2BC13,H2BC15,H2BC14,H2BC9,H2BC17,H2BC21,H3C1,H3C4,H3C3,H3C6,H3C11,H3C8,H3C12,H3C10,H3C2,H4C1,H4C4,H4C6,H4C12,H4C3,H4C8,H4C2,H4C5,H4C13,H3C7,H2AC11,H2BC11,H2AC12,H2BC12,H2AW,H4-16,H2BU1,H2AC21,H2BC18,H3C13
1_Member	KEGG Pathway	hsa05322	Systemic lupus erythematosus	-49.1073	-45.802	48/136	3012,3013,3017,3018,8294,8329,8330,8331,8332,8334,8335,8336,8338,8340,8341,8342,8345,8348,8349,8350,8351,8352,8353,8354,8355,8356,8357,8358,8359,8360,8361,8362,8364,8365,8366,8367,8368,8968,8969,8970,85235,85236,92815,121504,128312,317772,440689,653604	H2AC8,H2AC7,H2BC5,H2BC3,H4C9,H2AC13,H2AC15,H2AC14,H2AC16,H2AC6,H2AC4,H2AC17,H2AC20,H2BC13,H2BC15,H2BC14,H2BC9,H2BC17,H2BC21,H3C1,H3C4,H3C3,H3C6,H3C11,H3C8,H3C12,H3C10,H3C2,H4C1,H4C4,H4C6,H4C12,H4C3,H4C8,H4C2,H4C5,H4C13,H3C7,H2AC11,H2BC11,H2AC12,H2BC12,H2AW,H4-16,H2BU1,H2AC21,H2BC18,H3C13
1_Member	Reactome Gene Sets	R-HSA-212300	PRC2 methylates histones and DNA	-48.854	-45.6213	39/73	3012,3013,3017,3018,8294,8331,8334,8335,8338,8340,8341,8342,8345,8348,8349,8350,8351,8352,8353,8354,8355,8356,8357,8358,8359,8360,8361,8362,8364,8365,8366,8367,8368,8968,8970,85236,121504,128312,653604	H2AC8,H2AC7,H2BC5,H2BC3,H4C9,H2AC14,H2AC6,H2AC4,H2AC20,H2BC13,H2BC15,H2BC14,H2BC9,H2BC17,H2BC21,H3C1,H3C4,H3C3,H3C6,H3C11,H3C8,H3C12,H3C10,H3C2,H4C1,H4C4,H4C6,H4C12,H4C3,H4C8,H4C2,H4C5,H4C13,H3C7,H2BC11,H2BC12,H4-16,H2BU1,H3C13
1_Member	Reactome Gene Sets	R-HSA-9710421	Defective pyroptosis	-48.854	-45.6213	39/73	3012,3013,3017,3018,8294,8331,8334,8335,8338,8340,8341,8342,8345,8348,8349,8350,8351,8352,8353,8354,8355,8356,8357,8358,8359,8360,8361,8362,8364,8365,8366,8367,8368,8968,8970,85236,121504,128312,653604	H2AC8,H2AC7,H2BC5,H2BC3,H4C9,H2AC14,H2AC6,H2AC4,H2AC20,H2BC13,H2BC15,H2BC14,H2BC9,H2BC17,H2BC21,H3C1,H3C4,H3C3,H3C6,H3C11,H3C8,H3C12,H3C10,H3C2,H4C1,H4C4,H4C6,H4C12,H4C3,H4C8,H4C2,H4C5,H4C13,H3C7,H2BC11,H2BC12,H4-16,H2BU1,H3C13
1_Member	Reactome Gene Sets	R-HSA-2299718	Condensation of Prophase Chromosomes	-48.5357	-45.3433	39/74	3012,3013,3017,3018,8294,8331,8334,8335,8338,8340,8341,8342,8345,8348,8349,8350,8351,8352,8353,8354,8355,8356,8357,8358,8359,8360,8361,8362,8364,8365,8366,8367,8368,8968,8970,85236,121504,128312,653604	H2AC8,H2AC7,H2BC5,H2BC3,H4C9,H2AC14,H2AC6,H2AC4,H2AC20,H2BC13,H2BC15,H2BC14,H2BC9,H2BC17,H2BC21,H3C1,H3C4,H3C3,H3C6,H3C11,H3C8,H3C12,H3C10,H3C2,H4C1,H4C4,H4C6,H4C12,H4C3,H4C8,H4C2,H4C5,H4C13,H3C7,H2BC11,H2BC12,H4-16,H2BU1,H3C13
1_Member	Reactome Gene Sets	R-HSA-1912408	Pre-NOTCH Transcription and Translation	-48.5139	-45.3433	42/93	3012,3013,3017,3018,8294,8331,8334,8335,8338,8340,8341,8342,8345,8348,8349,8350,8351,8352,8353,8354,8355,8356,8357,8358,8359,8360,8361,8362,8364,8365,8366,8367,8368,8968,8970,23112,26523,27161,85236,121504,128312,653604	H2AC8,H2AC7,H2BC5,H2BC3,H4C9,H2AC14,H2AC6,H2AC4,H2AC20,H2BC13,H2BC15,H2BC14,H2BC9,H2BC17,H2BC21,H3C1,H3C4,H3C3,H3C6,H3C11,H3C8,H3C12,H3C10,H3C2,H4C1,H4C4,H4C6,H4C12,H4C3,H4C8,H4C2,H4C5,H4C13,H3C7,H2BC11,TNRC6B,AGO1,AGO2,H2BC12,H4-16,H2BU1,H3C13
1_Member	Reactome Gene Sets	R-HSA-427389	ERCC6 (CSB) and EHMT2 (G9a) positively regulate rRNA expression	-47.9178	-44.7753	39/76	3012,3013,3017,3018,8294,8331,8334,8335,8338,8340,8341,8342,8345,8348,8349,8350,8351,8352,8353,8354,8355,8356,8357,8358,8359,8360,8361,8362,8364,8365,8366,8367,8368,8968,8970,85236,121504,128312,653604	H2AC8,H2AC7,H2BC5,H2BC3,H4C9,H2AC14,H2AC6,H2AC4,H2AC20,H2BC13,H2BC15,H2BC14,H2BC9,H2BC17,H2BC21,H3C1,H3C4,H3C3,H3C6,H3C11,H3C8,H3C12,H3C10,H3C2,H4C1,H4C4,H4C6,H4C12,H4C3,H4C8,H4C2,H4C5,H4C13,H3C7,H2BC11,H2BC12,H4-16,H2BU1,H3C13
1_Member	KEGG Pathway	hsa05034	Alcoholism	-47.0321	-43.9159	52/187	2354,2790,3012,3013,3017,3018,4915,8294,8329,8330,8331,8332,8334,8335,8336,8338,8340,8341,8342,8345,8348,8349,8350,8351,8352,8353,8354,8355,8356,8357,8358,8359,8360,8361,8362,8364,8365,8366,8367,8368,8968,8969,8970,9759,85235,85236,92815,121504,128312,317772,440689,653604	FOSB,GNG10,H2AC8,H2AC7,H2BC5,H2BC3,NTRK2,H4C9,H2AC13,H2AC15,H2AC14,H2AC16,H2AC6,H2AC4,H2AC17,H2AC20,H2BC13,H2BC15,H2BC14,H2BC9,H2BC17,H2BC21,H3C1,H3C4,H3C3,H3C6,H3C11,H3C8,H3C12,H3C10,H3C2,H4C1,H4C4,H4C6,H4C12,H4C3,H4C8,H4C2,H4C5,H4C13,H3C7,H2AC11,H2BC11,HDAC4,H2AC12,H2BC12,H2AW,H4-16,H2BU1,H2AC21,H2BC18,H3C13
1_Member	KEGG Pathway	hsa04613	Neutrophil extracellular trap formation	-46.6328	-43.5414	52/190	3012,3013,3017,3018,5600,5605,8294,8329,8330,8331,8332,8334,8335,8336,8338,8340,8341,8342,8345,8348,8349,8350,8351,8352,8353,8354,8355,8356,8357,8358,8359,8360,8361,8362,8364,8365,8366,8367,8368,8968,8969,8970,9759,23236,85235,85236,92815,121504,128312,317772,440689,653604	H2AC8,H2AC7,H2BC5,H2BC3,MAPK11,MAP2K2,H4C9,H2AC13,H2AC15,H2AC14,H2AC16,H2AC6,H2AC4,H2AC17,H2AC20,H2BC13,H2BC15,H2BC14,H2BC9,H2BC17,H2BC21,H3C1,H3C4,H3C3,H3C6,H3C11,H3C8,H3C12,H3C10,H3C2,H4C1,H4C4,H4C6,H4C12,H4C3,H4C8,H4C2,H4C5,H4C13,H3C7,H2AC11,H2BC11,HDAC4,PLCB1,H2AC12,H2BC12,H2AW,H4-16,H2BU1,H2AC21,H2BC18,H3C13
1_Member	Reactome Gene Sets	R-HSA-8936459	RUNX1 regulates genes involved in megakaryocyte differentiation and platelet function	-45.8653	-42.7974	41/97	3012,3013,3017,3018,8294,8331,8334,8335,8338,8340,8341,8342,8345,8348,8349,8350,8351,8352,8353,8354,8355,8356,8357,8358,8359,8360,8361,8362,8364,8365,8366,8367,8368,8968,8970,23112,26523,85236,121504,128312,653604	H2AC8,H2AC7,H2BC5,H2BC3,H4C9,H2AC14,H2AC6,H2AC4,H2AC20,H2BC13,H2BC15,H2BC14,H2BC9,H2BC17,H2BC21,H3C1,H3C4,H3C3,H3C6,H3C11,H3C8,H3C12,H3C10,H3C2,H4C1,H4C4,H4C6,H4C12,H4C3,H4C8,H4C2,H4C5,H4C13,H3C7,H2BC11,TNRC6B,AGO1,H2BC12,H4-16,H2BU1,H3C13
1_Member	Reactome Gene Sets	R-HSA-2559583	Cellular Senescence	-45.7307	-42.6851	52/197	1021,2353,3006,3007,3008,3009,3012,3013,3017,3018,4193,4194,4217,5600,8294,8331,8334,8335,8338,8340,8341,8342,8345,8348,8349,8350,8351,8352,8353,8354,8355,8356,8357,8358,8359,8360,8361,8362,8364,8365,8366,8367,8368,8968,8970,23112,23466,26523,85236,121504,128312,653604	CDK6,FOS,H1-2,H1-3,H1-4,H1-5,H2AC8,H2AC7,H2BC5,H2BC3,MDM2,MDM4,MAP3K5,MAPK11,H4C9,H2AC14,H2AC6,H2AC4,H2AC20,H2BC13,H2BC15,H2BC14,H2BC9,H2BC17,H2BC21,H3C1,H3C4,H3C3,H3C6,H3C11,H3C8,H3C12,H3C10,H3C2,H4C1,H4C4,H4C6,H4C12,H4C3,H4C8,H4C2,H4C5,H4C13,H3C7,H2BC11,TNRC6B,CBX6,AGO1,H2BC12,H4-16,H2BU1,H3C13
1_Member	Reactome Gene Sets	R-HSA-9609646	HCMV Infection	-45.1851	-42.1606	48/160	3012,3013,3017,3018,8294,8329,8330,8331,8332,8334,8335,8336,8338,8340,8341,8342,8345,8348,8349,8350,8351,8352,8353,8354,8355,8356,8357,8358,8359,8360,8361,8362,8364,8365,8366,8367,8368,8968,8969,8970,85235,85236,92815,121504,128312,317772,440689,653604	H2AC8,H2AC7,H2BC5,H2BC3,H4C9,H2AC13,H2AC15,H2AC14,H2AC16,H2AC6,H2AC4,H2AC17,H2AC20,H2BC13,H2BC15,H2BC14,H2BC9,H2BC17,H2BC21,H3C1,H3C4,H3C3,H3C6,H3C11,H3C8,H3C12,H3C10,H3C2,H4C1,H4C4,H4C6,H4C12,H4C3,H4C8,H4C2,H4C5,H4C13,H3C7,H2AC11,H2BC11,H2AC12,H2BC12,H2AW,H4-16,H2BU1,H2AC21,H2BC18,H3C13
1_Member	Reactome Gene Sets	R-HSA-912446	Meiotic recombination	-45.1507	-42.1464	39/86	3012,3013,3017,3018,8294,8331,8334,8335,8338,8340,8341,8342,8345,8348,8349,8350,8351,8352,8353,8354,8355,8356,8357,8358,8359,8360,8361,8362,8364,8365,8366,8367,8368,8968,8970,85236,121504,128312,653604	H2AC8,H2AC7,H2BC5,H2BC3,H4C9,H2AC14,H2AC6,H2AC4,H2AC20,H2BC13,H2BC15,H2BC14,H2BC9,H2BC17,H2BC21,H3C1,H3C4,H3C3,H3C6,H3C11,H3C8,H3C12,H3C10,H3C2,H4C1,H4C4,H4C6,H4C12,H4C3,H4C8,H4C2,H4C5,H4C13,H3C7,H2BC11,H2BC12,H4-16,H2BU1,H3C13
1_Member	Reactome Gene Sets	R-HSA-1912422	Pre-NOTCH Expression and Processing	-44.897	-41.9121	42/109	3012,3013,3017,3018,8294,8331,8334,8335,8338,8340,8341,8342,8345,8348,8349,8350,8351,8352,8353,8354,8355,8356,8357,8358,8359,8360,8361,8362,8364,8365,8366,8367,8368,8968,8970,23112,26523,27161,85236,121504,128312,653604	H2AC8,H2AC7,H2BC5,H2BC3,H4C9,H2AC14,H2AC6,H2AC4,H2AC20,H2BC13,H2BC15,H2BC14,H2BC9,H2BC17,H2BC21,H3C1,H3C4,H3C3,H3C6,H3C11,H3C8,H3C12,H3C10,H3C2,H4C1,H4C4,H4C6,H4C12,H4C3,H4C8,H4C2,H4C5,H4C13,H3C7,H2BC11,TNRC6B,AGO1,AGO2,H2BC12,H4-16,H2BU1,H3C13
1_Member	Reactome Gene Sets	R-HSA-9616222	Transcriptional regulation of granulopoiesis	-44.1682	-41.2017	39/90	3012,3013,3017,3018,8294,8331,8334,8335,8338,8340,8341,8342,8345,8348,8349,8350,8351,8352,8353,8354,8355,8356,8357,8358,8359,8360,8361,8362,8364,8365,8366,8367,8368,8968,8970,85236,121504,128312,653604	H2AC8,H2AC7,H2BC5,H2BC3,H4C9,H2AC14,H2AC6,H2AC4,H2AC20,H2BC13,H2BC15,H2BC14,H2BC9,H2BC17,H2BC21,H3C1,H3C4,H3C3,H3C6,H3C11,H3C8,H3C12,H3C10,H3C2,H4C1,H4C4,H4C6,H4C12,H4C3,H4C8,H4C2,H4C5,H4C13,H3C7,H2BC11,H2BC12,H4-16,H2BU1,H3C13
1_Member	Reactome Gene Sets	R-HSA-201722	Formation of the beta-catenin:TCF transactivating complex	-43.9319	-41.0166	39/91	3012,3013,3017,3018,8294,8331,8334,8335,8338,8340,8341,8342,8345,8348,8349,8350,8351,8352,8353,8354,8355,8356,8357,8358,8359,8360,8361,8362,8364,8365,8366,8367,8368,8968,8970,85236,121504,128312,653604	H2AC8,H2AC7,H2BC5,H2BC3,H4C9,H2AC14,H2AC6,H2AC4,H2AC20,H2BC13,H2BC15,H2BC14,H2BC9,H2BC17,H2BC21,H3C1,H3C4,H3C3,H3C6,H3C11,H3C8,H3C12,H3C10,H3C2,H4C1,H4C4,H4C6,H4C12,H4C3,H4C8,H4C2,H4C5,H4C13,H3C7,H2BC11,H2BC12,H4-16,H2BU1,H3C13
1_Member	Reactome Gene Sets	R-HSA-5250924	B-WICH complex positively regulates rRNA expression	-43.9319	-41.0166	39/91	3012,3013,3017,3018,8294,8331,8334,8335,8338,8340,8341,8342,8345,8348,8349,8350,8351,8352,8353,8354,8355,8356,8357,8358,8359,8360,8361,8362,8364,8365,8366,8367,8368,8968,8970,85236,121504,128312,653604	H2AC8,H2AC7,H2BC5,H2BC3,H4C9,H2AC14,H2AC6,H2AC4,H2AC20,H2BC13,H2BC15,H2BC14,H2BC9,H2BC17,H2BC21,H3C1,H3C4,H3C3,H3C6,H3C11,H3C8,H3C12,H3C10,H3C2,H4C1,H4C4,H4C6,H4C12,H4C3,H4C8,H4C2,H4C5,H4C13,H3C7,H2BC11,H2BC12,H4-16,H2BU1,H3C13
1_Member	Reactome Gene Sets	R-HSA-73772	RNA Polymerase I Promoter Escape	-43.9319	-41.0166	39/91	3012,3013,3017,3018,8294,8331,8334,8335,8338,8340,8341,8342,8345,8348,8349,8350,8351,8352,8353,8354,8355,8356,8357,8358,8359,8360,8361,8362,8364,8365,8366,8367,8368,8968,8970,85236,121504,128312,653604	H2AC8,H2AC7,H2BC5,H2BC3,H4C9,H2AC14,H2AC6,H2AC4,H2AC20,H2BC13,H2BC15,H2BC14,H2BC9,H2BC17,H2BC21,H3C1,H3C4,H3C3,H3C6,H3C11,H3C8,H3C12,H3C10,H3C2,H4C1,H4C4,H4C6,H4C12,H4C3,H4C8,H4C2,H4C5,H4C13,H3C7,H2BC11,H2BC12,H4-16,H2BU1,H3C13
1_Member	Reactome Gene Sets	R-HSA-5578749	Transcriptional regulation by small RNAs	-43.9145	-41.015	41/106	3012,3013,3017,3018,8294,8331,8334,8335,8338,8340,8341,8342,8345,8348,8349,8350,8351,8352,8353,8354,8355,8356,8357,8358,8359,8360,8361,8362,8364,8365,8366,8367,8368,8968,8970,26523,27161,85236,121504,128312,653604	H2AC8,H2AC7,H2BC5,H2BC3,H4C9,H2AC14,H2AC6,H2AC4,H2AC20,H2BC13,H2BC15,H2BC14,H2BC9,H2BC17,H2BC21,H3C1,H3C4,H3C3,H3C6,H3C11,H3C8,H3C12,H3C10,H3C2,H4C1,H4C4,H4C6,H4C12,H4C3,H4C8,H4C2,H4C5,H4C13,H3C7,H2BC11,AGO1,AGO2,H2BC12,H4-16,H2BU1,H3C13
1_Member	Reactome Gene Sets	R-HSA-5625740	RHO GTPases activate PKNs	-43.0212	-40.1369	39/95	3012,3013,3017,3018,8294,8331,8334,8335,8338,8340,8341,8342,8345,8348,8349,8350,8351,8352,8353,8354,8355,8356,8357,8358,8359,8360,8361,8362,8364,8365,8366,8367,8368,8968,8970,85236,121504,128312,653604	H2AC8,H2AC7,H2BC5,H2BC3,H4C9,H2AC14,H2AC6,H2AC4,H2AC20,H2BC13,H2BC15,H2BC14,H2BC9,H2BC17,H2BC21,H3C1,H3C4,H3C3,H3C6,H3C11,H3C8,H3C12,H3C10,H3C2,H4C1,H4C4,H4C6,H4C12,H4C3,H4C8,H4C2,H4C5,H4C13,H3C7,H2BC11,H2BC12,H4-16,H2BU1,H3C13
1_Member	Reactome Gene Sets	R-HSA-9645723	Diseases of programmed cell death	-42.9331	-40.0681	40/103	708,3012,3013,3017,3018,8294,8331,8334,8335,8338,8340,8341,8342,8345,8348,8349,8350,8351,8352,8353,8354,8355,8356,8357,8358,8359,8360,8361,8362,8364,8365,8366,8367,8368,8968,8970,85236,121504,128312,653604	C1QBP,H2AC8,H2AC7,H2BC5,H2BC3,H4C9,H2AC14,H2AC6,H2AC4,H2AC20,H2BC13,H2BC15,H2BC14,H2BC9,H2BC17,H2BC21,H3C1,H3C4,H3C3,H3C6,H3C11,H3C8,H3C12,H3C10,H3C2,H4C1,H4C4,H4C6,H4C12,H4C3,H4C8,H4C2,H4C5,H4C13,H3C7,H2BC11,H2BC12,H4-16,H2BU1,H3C13
1_Member	Reactome Gene Sets	R-HSA-977225	Amyloid fiber formation	-42.9234	-40.0681	41/111	3012,3013,3017,3018,8294,8331,8334,8335,8338,8340,8341,8342,8345,8348,8349,8350,8351,8352,8353,8354,8355,8356,8357,8358,8359,8360,8361,8362,8364,8365,8366,8367,8368,8968,8970,10098,81619,85236,121504,128312,653604	H2AC8,H2AC7,H2BC5,H2BC3,H4C9,H2AC14,H2AC6,H2AC4,H2AC20,H2BC13,H2BC15,H2BC14,H2BC9,H2BC17,H2BC21,H3C1,H3C4,H3C3,H3C6,H3C11,H3C8,H3C12,H3C10,H3C2,H4C1,H4C4,H4C6,H4C12,H4C3,H4C8,H4C2,H4C5,H4C13,H3C7,H2BC11,TSPAN5,TSPAN14,H2BC12,H4-16,H2BU1,H3C13
1_Member	Reactome Gene Sets	R-HSA-2559582	Senescence-Associated Secretory Phenotype (SASP)	-42.7322	-39.8907	41/112	1021,2353,3012,3013,3017,3018,8294,8331,8334,8335,8338,8340,8341,8342,8345,8348,8349,8350,8351,8352,8353,8354,8355,8356,8357,8358,8359,8360,8361,8362,8364,8365,8366,8367,8368,8968,8970,85236,121504,128312,653604	CDK6,FOS,H2AC8,H2AC7,H2BC5,H2BC3,H4C9,H2AC14,H2AC6,H2AC4,H2AC20,H2BC13,H2BC15,H2BC14,H2BC9,H2BC17,H2BC21,H3C1,H3C4,H3C3,H3C6,H3C11,H3C8,H3C12,H3C10,H3C2,H4C1,H4C4,H4C6,H4C12,H4C3,H4C8,H4C2,H4C5,H4C13,H3C7,H2BC11,H2BC12,H4-16,H2BU1,H3C13
1_Member	Reactome Gene Sets	R-HSA-3214858	RMTs methylate histone arginines	-41.7944	-38.9662	36/79	3012,3013,8294,8329,8330,8331,8332,8334,8335,8336,8338,8350,8351,8352,8353,8354,8355,8356,8357,8358,8359,8360,8361,8362,8364,8365,8366,8367,8368,8968,8969,85235,92815,121504,317772,653604	H2AC8,H2AC7,H4C9,H2AC13,H2AC15,H2AC14,H2AC16,H2AC6,H2AC4,H2AC17,H2AC20,H3C1,H3C4,H3C3,H3C6,H3C11,H3C8,H3C12,H3C10,H3C2,H4C1,H4C4,H4C6,H4C12,H4C3,H4C8,H4C2,H4C5,H4C13,H3C7,H2AC11,H2AC12,H2AW,H4-16,H2AC21,H3C13
1_Member	Reactome Gene Sets	R-HSA-9018519	Estrogen-dependent gene expression	-40.9401	-38.1249	44/150	2353,2354,3012,3013,3017,3018,8294,8331,8334,8335,8338,8340,8341,8342,8345,8348,8349,8350,8351,8352,8353,8354,8355,8356,8357,8358,8359,8360,8361,8362,8364,8365,8366,8367,8368,8968,8970,23112,26523,27161,85236,121504,128312,653604	FOS,FOSB,H2AC8,H2AC7,H2BC5,H2BC3,H4C9,H2AC14,H2AC6,H2AC4,H2AC20,H2BC13,H2BC15,H2BC14,H2BC9,H2BC17,H2BC21,H3C1,H3C4,H3C3,H3C6,H3C11,H3C8,H3C12,H3C10,H3C2,H4C1,H4C4,H4C6,H4C12,H4C3,H4C8,H4C2,H4C5,H4C13,H3C7,H2BC11,TNRC6B,AGO1,AGO2,H2BC12,H4-16,H2BU1,H3C13
1_Member	Reactome Gene Sets	R-HSA-5250913	Positive epigenetic regulation of rRNA expression	-40.7607	-37.9581	39/106	3012,3013,3017,3018,8294,8331,8334,8335,8338,8340,8341,8342,8345,8348,8349,8350,8351,8352,8353,8354,8355,8356,8357,8358,8359,8360,8361,8362,8364,8365,8366,8367,8368,8968,8970,85236,121504,128312,653604	H2AC8,H2AC7,H2BC5,H2BC3,H4C9,H2AC14,H2AC6,H2AC4,H2AC20,H2BC13,H2BC15,H2BC14,H2BC9,H2BC17,H2BC21,H3C1,H3C4,H3C3,H3C6,H3C11,H3C8,H3C12,H3C10,H3C2,H4C1,H4C4,H4C6,H4C12,H4C3,H4C8,H4C2,H4C5,H4C13,H3C7,H2BC11,H2BC12,H4-16,H2BU1,H3C13
1_Member	Reactome Gene Sets	R-HSA-427413	NoRC negatively regulates rRNA expression	-40.5706	-37.7802	39/107	3012,3013,3017,3018,8294,8331,8334,8335,8338,8340,8341,8342,8345,8348,8349,8350,8351,8352,8353,8354,8355,8356,8357,8358,8359,8360,8361,8362,8364,8365,8366,8367,8368,8968,8970,85236,121504,128312,653604	H2AC8,H2AC7,H2BC5,H2BC3,H4C9,H2AC14,H2AC6,H2AC4,H2AC20,H2BC13,H2BC15,H2BC14,H2BC9,H2BC17,H2BC21,H3C1,H3C4,H3C3,H3C6,H3C11,H3C8,H3C12,H3C10,H3C2,H4C1,H4C4,H4C6,H4C12,H4C3,H4C8,H4C2,H4C5,H4C13,H3C7,H2BC11,H2BC12,H4-16,H2BU1,H3C13
1_Member	Reactome Gene Sets	R-HSA-5250941	Negative epigenetic regulation of rRNA expression	-40.0139	-37.247	39/110	3012,3013,3017,3018,8294,8331,8334,8335,8338,8340,8341,8342,8345,8348,8349,8350,8351,8352,8353,8354,8355,8356,8357,8358,8359,8360,8361,8362,8364,8365,8366,8367,8368,8968,8970,85236,121504,128312,653604	H2AC8,H2AC7,H2BC5,H2BC3,H4C9,H2AC14,H2AC6,H2AC4,H2AC20,H2BC13,H2BC15,H2BC14,H2BC9,H2BC17,H2BC21,H3C1,H3C4,H3C3,H3C6,H3C11,H3C8,H3C12,H3C10,H3C2,H4C1,H4C4,H4C6,H4C12,H4C3,H4C8,H4C2,H4C5,H4C13,H3C7,H2BC11,H2BC12,H4-16,H2BU1,H3C13
1_Member	Reactome Gene Sets	R-HSA-73854	RNA Polymerase I Promoter Clearance	-40.0139	-37.247	39/110	3012,3013,3017,3018,8294,8331,8334,8335,8338,8340,8341,8342,8345,8348,8349,8350,8351,8352,8353,8354,8355,8356,8357,8358,8359,8360,8361,8362,8364,8365,8366,8367,8368,8968,8970,85236,121504,128312,653604	H2AC8,H2AC7,H2BC5,H2BC3,H4C9,H2AC14,H2AC6,H2AC4,H2AC20,H2BC13,H2BC15,H2BC14,H2BC9,H2BC17,H2BC21,H3C1,H3C4,H3C3,H3C6,H3C11,H3C8,H3C12,H3C10,H3C2,H4C1,H4C4,H4C6,H4C12,H4C3,H4C8,H4C2,H4C5,H4C13,H3C7,H2BC11,H2BC12,H4-16,H2BU1,H3C13
1_Member	Reactome Gene Sets	R-HSA-211000	Gene Silencing by RNA	-39.847	-37.0914	42/138	3012,3013,3017,3018,8294,8331,8334,8335,8338,8340,8341,8342,8345,8348,8349,8350,8351,8352,8353,8354,8355,8356,8357,8358,8359,8360,8361,8362,8364,8365,8366,8367,8368,8968,8970,23112,26523,27161,85236,121504,128312,653604	H2AC8,H2AC7,H2BC5,H2BC3,H4C9,H2AC14,H2AC6,H2AC4,H2AC20,H2BC13,H2BC15,H2BC14,H2BC9,H2BC17,H2BC21,H3C1,H3C4,H3C3,H3C6,H3C11,H3C8,H3C12,H3C10,H3C2,H4C1,H4C4,H4C6,H4C12,H4C3,H4C8,H4C2,H4C5,H4C13,H3C7,H2BC11,TNRC6B,AGO1,AGO2,H2BC12,H4-16,H2BU1,H3C13
1_Member	Reactome Gene Sets	R-HSA-73864	RNA Polymerase I Transcription	-39.6536	-36.909	39/112	3012,3013,3017,3018,8294,8331,8334,8335,8338,8340,8341,8342,8345,8348,8349,8350,8351,8352,8353,8354,8355,8356,8357,8358,8359,8360,8361,8362,8364,8365,8366,8367,8368,8968,8970,85236,121504,128312,653604	H2AC8,H2AC7,H2BC5,H2BC3,H4C9,H2AC14,H2AC6,H2AC4,H2AC20,H2BC13,H2BC15,H2BC14,H2BC9,H2BC17,H2BC21,H3C1,H3C4,H3C3,H3C6,H3C11,H3C8,H3C12,H3C10,H3C2,H4C1,H4C4,H4C6,H4C12,H4C3,H4C8,H4C2,H4C5,H4C13,H3C7,H2BC11,H2BC12,H4-16,H2BU1,H3C13
1_Member	Reactome Gene Sets	R-HSA-1500620	Meiosis	-38.6204	-35.8865	39/118	3012,3013,3017,3018,8294,8331,8334,8335,8338,8340,8341,8342,8345,8348,8349,8350,8351,8352,8353,8354,8355,8356,8357,8358,8359,8360,8361,8362,8364,8365,8366,8367,8368,8968,8970,85236,121504,128312,653604	H2AC8,H2AC7,H2BC5,H2BC3,H4C9,H2AC14,H2AC6,H2AC4,H2AC20,H2BC13,H2BC15,H2BC14,H2BC9,H2BC17,H2BC21,H3C1,H3C4,H3C3,H3C6,H3C11,H3C8,H3C12,H3C10,H3C2,H4C1,H4C4,H4C6,H4C12,H4C3,H4C8,H4C2,H4C5,H4C13,H3C7,H2BC11,H2BC12,H4-16,H2BU1,H3C13
1_Member	Reactome Gene Sets	R-HSA-68867	Assembly of the pre-replicative complex	-38.1758	-35.4524	40/130	3012,3013,3017,3018,8294,8331,8334,8335,8338,8340,8341,8342,8345,8348,8349,8350,8351,8352,8353,8354,8355,8356,8357,8358,8359,8360,8361,8362,8364,8365,8366,8367,8368,8968,8970,23633,85236,121504,128312,653604	H2AC8,H2AC7,H2BC5,H2BC3,H4C9,H2AC14,H2AC6,H2AC4,H2AC20,H2BC13,H2BC15,H2BC14,H2BC9,H2BC17,H2BC21,H3C1,H3C4,H3C3,H3C6,H3C11,H3C8,H3C12,H3C10,H3C2,H4C1,H4C4,H4C6,H4C12,H4C3,H4C8,H4C2,H4C5,H4C13,H3C7,H2BC11,KPNA6,H2BC12,H4-16,H2BU1,H3C13
1_Member	Reactome Gene Sets	R-HSA-5617472	Activation of anterior HOX genes in hindbrain development during early embryogenesis	-38.1287	-35.4254	39/121	3012,3013,3017,3018,8294,8331,8334,8335,8338,8340,8341,8342,8345,8348,8349,8350,8351,8352,8353,8354,8355,8356,8357,8358,8359,8360,8361,8362,8364,8365,8366,8367,8368,8968,8970,85236,121504,128312,653604	H2AC8,H2AC7,H2BC5,H2BC3,H4C9,H2AC14,H2AC6,H2AC4,H2AC20,H2BC13,H2BC15,H2BC14,H2BC9,H2BC17,H2BC21,H3C1,H3C4,H3C3,H3C6,H3C11,H3C8,H3C12,H3C10,H3C2,H4C1,H4C4,H4C6,H4C12,H4C3,H4C8,H4C2,H4C5,H4C13,H3C7,H2BC11,H2BC12,H4-16,H2BU1,H3C13
1_Member	Reactome Gene Sets	R-HSA-5619507	Activation of HOX genes during differentiation	-38.1287	-35.4254	39/121	3012,3013,3017,3018,8294,8331,8334,8335,8338,8340,8341,8342,8345,8348,8349,8350,8351,8352,8353,8354,8355,8356,8357,8358,8359,8360,8361,8362,8364,8365,8366,8367,8368,8968,8970,85236,121504,128312,653604	H2AC8,H2AC7,H2BC5,H2BC3,H4C9,H2AC14,H2AC6,H2AC4,H2AC20,H2BC13,H2BC15,H2BC14,H2BC9,H2BC17,H2BC21,H3C1,H3C4,H3C3,H3C6,H3C11,H3C8,H3C12,H3C10,H3C2,H4C1,H4C4,H4C6,H4C12,H4C3,H4C8,H4C2,H4C5,H4C13,H3C7,H2BC11,H2BC12,H4-16,H2BU1,H3C13
1_Member	Reactome Gene Sets	R-HSA-8939236	RUNX1 regulates transcription of genes involved in differentiation of HSCs	-36.7412	-34.0477	39/130	3012,3013,3017,3018,8294,8331,8334,8335,8338,8340,8341,8342,8345,8348,8349,8350,8351,8352,8353,8354,8355,8356,8357,8358,8359,8360,8361,8362,8364,8365,8366,8367,8368,8968,8970,85236,121504,128312,653604	H2AC8,H2AC7,H2BC5,H2BC3,H4C9,H2AC14,H2AC6,H2AC4,H2AC20,H2BC13,H2BC15,H2BC14,H2BC9,H2BC17,H2BC21,H3C1,H3C4,H3C3,H3C6,H3C11,H3C8,H3C12,H3C10,H3C2,H4C1,H4C4,H4C6,H4C12,H4C3,H4C8,H4C2,H4C5,H4C13,H3C7,H2BC11,H2BC12,H4-16,H2BU1,H3C13
1_Member	GO Biological Processes	GO:0006334	nucleosome assembly	-36.0542	-33.3702	38/125	3006,3007,3008,3009,3017,3018,8294,8340,8341,8342,8345,8348,8349,8350,8351,8352,8353,8354,8355,8356,8357,8358,8359,8360,8361,8362,8364,8365,8366,8367,8368,8968,8970,85236,121504,128312,440689,653604	H1-2,H1-3,H1-4,H1-5,H2BC5,H2BC3,H4C9,H2BC13,H2BC15,H2BC14,H2BC9,H2BC17,H2BC21,H3C1,H3C4,H3C3,H3C6,H3C11,H3C8,H3C12,H3C10,H3C2,H4C1,H4C4,H4C6,H4C12,H4C3,H4C8,H4C2,H4C5,H4C13,H3C7,H2BC11,H2BC12,H4-16,H2BU1,H2BC18,H3C13
1_Member	Reactome Gene Sets	R-HSA-69002	DNA Replication Pre-Initiation	-35.7812	-33.1066	40/147	3012,3013,3017,3018,8294,8331,8334,8335,8338,8340,8341,8342,8345,8348,8349,8350,8351,8352,8353,8354,8355,8356,8357,8358,8359,8360,8361,8362,8364,8365,8366,8367,8368,8968,8970,23633,85236,121504,128312,653604	H2AC8,H2AC7,H2BC5,H2BC3,H4C9,H2AC14,H2AC6,H2AC4,H2AC20,H2BC13,H2BC15,H2BC14,H2BC9,H2BC17,H2BC21,H3C1,H3C4,H3C3,H3C6,H3C11,H3C8,H3C12,H3C10,H3C2,H4C1,H4C4,H4C6,H4C12,H4C3,H4C8,H4C2,H4C5,H4C13,H3C7,H2BC11,KPNA6,H2BC12,H4-16,H2BU1,H3C13
1_Member	Reactome Gene Sets	R-HSA-212165	Epigenetic regulation of gene expression	-35.5221	-32.8567	40/149	3012,3013,3017,3018,8294,8331,8334,8335,8338,8340,8341,8342,8345,8348,8349,8350,8351,8352,8353,8354,8355,8356,8357,8358,8359,8360,8361,8362,8364,8365,8366,8367,8368,8968,8970,80312,85236,121504,128312,653604	H2AC8,H2AC7,H2BC5,H2BC3,H4C9,H2AC14,H2AC6,H2AC4,H2AC20,H2BC13,H2BC15,H2BC14,H2BC9,H2BC17,H2BC21,H3C1,H3C4,H3C3,H3C6,H3C11,H3C8,H3C12,H3C10,H3C2,H4C1,H4C4,H4C6,H4C12,H4C3,H4C8,H4C2,H4C5,H4C13,H3C7,H2BC11,TET1,H2BC12,H4-16,H2BU1,H3C13
1_Member	Reactome Gene Sets	R-HSA-3247509	Chromatin modifying enzymes	-35.4972	-32.8495	50/274	3012,3013,3017,3018,6314,8242,8294,8329,8330,8331,8332,8334,8335,8336,8338,8340,8341,8342,8345,8348,8349,8350,8351,8352,8353,8354,8355,8356,8357,8358,8359,8360,8361,8362,8364,8365,8366,8367,8368,8968,8969,8970,85235,85236,92815,121504,128312,317772,440689,653604	H2AC8,H2AC7,H2BC5,H2BC3,ATXN7,KDM5C,H4C9,H2AC13,H2AC15,H2AC14,H2AC16,H2AC6,H2AC4,H2AC17,H2AC20,H2BC13,H2BC15,H2BC14,H2BC9,H2BC17,H2BC21,H3C1,H3C4,H3C3,H3C6,H3C11,H3C8,H3C12,H3C10,H3C2,H4C1,H4C4,H4C6,H4C12,H4C3,H4C8,H4C2,H4C5,H4C13,H3C7,H2AC11,H2BC11,H2AC12,H2BC12,H2AW,H4-16,H2BU1,H2AC21,H2BC18,H3C13
1_Member	Reactome Gene Sets	R-HSA-4839726	Chromatin organization	-35.4972	-32.8495	50/274	3012,3013,3017,3018,6314,8242,8294,8329,8330,8331,8332,8334,8335,8336,8338,8340,8341,8342,8345,8348,8349,8350,8351,8352,8353,8354,8355,8356,8357,8358,8359,8360,8361,8362,8364,8365,8366,8367,8368,8968,8969,8970,85235,85236,92815,121504,128312,317772,440689,653604	H2AC8,H2AC7,H2BC5,H2BC3,ATXN7,KDM5C,H4C9,H2AC13,H2AC15,H2AC14,H2AC16,H2AC6,H2AC4,H2AC17,H2AC20,H2BC13,H2BC15,H2BC14,H2BC9,H2BC17,H2BC21,H3C1,H3C4,H3C3,H3C6,H3C11,H3C8,H3C12,H3C10,H3C2,H4C1,H4C4,H4C6,H4C12,H4C3,H4C8,H4C2,H4C5,H4C13,H3C7,H2AC11,H2BC11,H2AC12,H2BC12,H2AW,H4-16,H2BU1,H2AC21,H2BC18,H3C13
1_Member	Reactome Gene Sets	R-HSA-171306	Packaging Of Telomere Ends	-35.2955	-32.6564	28/52	3012,3013,3017,3018,8294,8331,8334,8335,8338,8340,8341,8342,8345,8348,8349,8359,8360,8361,8362,8364,8365,8366,8367,8368,8970,85236,121504,128312	H2AC8,H2AC7,H2BC5,H2BC3,H4C9,H2AC14,H2AC6,H2AC4,H2AC20,H2BC13,H2BC15,H2BC14,H2BC9,H2BC17,H2BC21,H4C1,H4C4,H4C6,H4C12,H4C3,H4C8,H4C2,H4C5,H4C13,H2BC11,H2BC12,H4-16,H2BU1
1_Member	Reactome Gene Sets	R-HSA-8939211	ESR-mediated signaling	-35.1841	-32.5534	46/223	1839,2353,2354,2790,3012,3013,3017,3018,8294,8331,8334,8335,8338,8340,8341,8342,8345,8348,8349,8350,8351,8352,8353,8354,8355,8356,8357,8358,8359,8360,8361,8362,8364,8365,8366,8367,8368,8968,8970,23112,26523,27161,85236,121504,128312,653604	HBEGF,FOS,FOSB,GNG10,H2AC8,H2AC7,H2BC5,H2BC3,H4C9,H2AC14,H2AC6,H2AC4,H2AC20,H2BC13,H2BC15,H2BC14,H2BC9,H2BC17,H2BC21,H3C1,H3C4,H3C3,H3C6,H3C11,H3C8,H3C12,H3C10,H3C2,H4C1,H4C4,H4C6,H4C12,H4C3,H4C8,H4C2,H4C5,H4C13,H3C7,H2BC11,TNRC6B,AGO1,AGO2,H2BC12,H4-16,H2BU1,H3C13
1_Member	Reactome Gene Sets	R-HSA-68875	Mitotic Prophase	-35.0675	-32.4451	39/142	3012,3013,3017,3018,8294,8331,8334,8335,8338,8340,8341,8342,8345,8348,8349,8350,8351,8352,8353,8354,8355,8356,8357,8358,8359,8360,8361,8362,8364,8365,8366,8367,8368,8968,8970,85236,121504,128312,653604	H2AC8,H2AC7,H2BC5,H2BC3,H4C9,H2AC14,H2AC6,H2AC4,H2AC20,H2BC13,H2BC15,H2BC14,H2BC9,H2BC17,H2BC21,H3C1,H3C4,H3C3,H3C6,H3C11,H3C8,H3C12,H3C10,H3C2,H4C1,H4C4,H4C6,H4C12,H4C3,H4C8,H4C2,H4C5,H4C13,H3C7,H2BC11,H2BC12,H4-16,H2BU1,H3C13
1_Member	Reactome Gene Sets	R-HSA-1474165	Reproduction	-34.936	-32.3217	39/143	3012,3013,3017,3018,8294,8331,8334,8335,8338,8340,8341,8342,8345,8348,8349,8350,8351,8352,8353,8354,8355,8356,8357,8358,8359,8360,8361,8362,8364,8365,8366,8367,8368,8968,8970,85236,121504,128312,653604	H2AC8,H2AC7,H2BC5,H2BC3,H4C9,H2AC14,H2AC6,H2AC4,H2AC20,H2BC13,H2BC15,H2BC14,H2BC9,H2BC17,H2BC21,H3C1,H3C4,H3C3,H3C6,H3C11,H3C8,H3C12,H3C10,H3C2,H4C1,H4C4,H4C6,H4C12,H4C3,H4C8,H4C2,H4C5,H4C13,H3C7,H2BC11,H2BC12,H4-16,H2BU1,H3C13
1_Member	Reactome Gene Sets	R-HSA-2559586	DNA Damage/Telomere Stress Induced Senescence	-34.9117	-32.3054	32/80	3006,3007,3008,3009,3012,3013,3017,3018,8294,8331,8334,8335,8338,8340,8341,8342,8345,8348,8349,8359,8360,8361,8362,8364,8365,8366,8367,8368,8970,85236,121504,128312	H1-2,H1-3,H1-4,H1-5,H2AC8,H2AC7,H2BC5,H2BC3,H4C9,H2AC14,H2AC6,H2AC4,H2AC20,H2BC13,H2BC15,H2BC14,H2BC9,H2BC17,H2BC21,H4C1,H4C4,H4C6,H4C12,H4C3,H4C8,H4C2,H4C5,H4C13,H2BC11,H2BC12,H4-16,H2BU1
1_Member	Reactome Gene Sets	R-HSA-110330	Recognition and association of DNA glycosylase with site containing an affected purine	-34.0692	-31.4859	28/56	3012,3013,3017,3018,8294,8331,8334,8335,8338,8340,8341,8342,8345,8348,8349,8359,8360,8361,8362,8364,8365,8366,8367,8368,8970,85236,121504,128312	H2AC8,H2AC7,H2BC5,H2BC3,H4C9,H2AC14,H2AC6,H2AC4,H2AC20,H2BC13,H2BC15,H2BC14,H2BC9,H2BC17,H2BC21,H4C1,H4C4,H4C6,H4C12,H4C3,H4C8,H4C2,H4C5,H4C13,H2BC11,H2BC12,H4-16,H2BU1
1_Member	Reactome Gene Sets	R-HSA-110331	Cleavage of the damaged purine	-34.0692	-31.4859	28/56	3012,3013,3017,3018,8294,8331,8334,8335,8338,8340,8341,8342,8345,8348,8349,8359,8360,8361,8362,8364,8365,8366,8367,8368,8970,85236,121504,128312	H2AC8,H2AC7,H2BC5,H2BC3,H4C9,H2AC14,H2AC6,H2AC4,H2AC20,H2BC13,H2BC15,H2BC14,H2BC9,H2BC17,H2BC21,H4C1,H4C4,H4C6,H4C12,H4C3,H4C8,H4C2,H4C5,H4C13,H2BC11,H2BC12,H4-16,H2BU1
1_Member	Reactome Gene Sets	R-HSA-73927	Depurination	-34.0692	-31.4859	28/56	3012,3013,3017,3018,8294,8331,8334,8335,8338,8340,8341,8342,8345,8348,8349,8359,8360,8361,8362,8364,8365,8366,8367,8368,8970,85236,121504,128312	H2AC8,H2AC7,H2BC5,H2BC3,H4C9,H2AC14,H2AC6,H2AC4,H2AC20,H2BC13,H2BC15,H2BC14,H2BC9,H2BC17,H2BC21,H4C1,H4C4,H4C6,H4C12,H4C3,H4C8,H4C2,H4C5,H4C13,H2BC11,H2BC12,H4-16,H2BU1
1_Member	Reactome Gene Sets	R-HSA-157118	Signaling by NOTCH	-32.8338	-30.258	45/236	3012,3013,3017,3018,3714,8294,8331,8334,8335,8338,8340,8341,8342,8345,8348,8349,8350,8351,8352,8353,8354,8355,8356,8357,8358,8359,8360,8361,8362,8364,8365,8366,8367,8368,8788,8968,8970,9759,23112,26523,27161,85236,121504,128312,653604	H2AC8,H2AC7,H2BC5,H2BC3,JAG2,H4C9,H2AC14,H2AC6,H2AC4,H2AC20,H2BC13,H2BC15,H2BC14,H2BC9,H2BC17,H2BC21,H3C1,H3C4,H3C3,H3C6,H3C11,H3C8,H3C12,H3C10,H3C2,H4C1,H4C4,H4C6,H4C12,H4C3,H4C8,H4C2,H4C5,H4C13,DLK1,H3C7,H2BC11,HDAC4,TNRC6B,AGO1,AGO2,H2BC12,H4-16,H2BU1,H3C13
1_Member	Reactome Gene Sets	R-HSA-110328	Recognition and association of DNA glycosylase with site containing an affected pyrimidine	-32.7044	-30.1501	28/61	3012,3013,3017,3018,8294,8331,8334,8335,8338,8340,8341,8342,8345,8348,8349,8359,8360,8361,8362,8364,8365,8366,8367,8368,8970,85236,121504,128312	H2AC8,H2AC7,H2BC5,H2BC3,H4C9,H2AC14,H2AC6,H2AC4,H2AC20,H2BC13,H2BC15,H2BC14,H2BC9,H2BC17,H2BC21,H4C1,H4C4,H4C6,H4C12,H4C3,H4C8,H4C2,H4C5,H4C13,H2BC11,H2BC12,H4-16,H2BU1
1_Member	Reactome Gene Sets	R-HSA-110329	Cleavage of the damaged pyrimidine	-32.7044	-30.1501	28/61	3012,3013,3017,3018,8294,8331,8334,8335,8338,8340,8341,8342,8345,8348,8349,8359,8360,8361,8362,8364,8365,8366,8367,8368,8970,85236,121504,128312	H2AC8,H2AC7,H2BC5,H2BC3,H4C9,H2AC14,H2AC6,H2AC4,H2AC20,H2BC13,H2BC15,H2BC14,H2BC9,H2BC17,H2BC21,H4C1,H4C4,H4C6,H4C12,H4C3,H4C8,H4C2,H4C5,H4C13,H2BC11,H2BC12,H4-16,H2BU1
1_Member	Reactome Gene Sets	R-HSA-73928	Depyrimidination	-32.7044	-30.1501	28/61	3012,3013,3017,3018,8294,8331,8334,8335,8338,8340,8341,8342,8345,8348,8349,8359,8360,8361,8362,8364,8365,8366,8367,8368,8970,85236,121504,128312	H2AC8,H2AC7,H2BC5,H2BC3,H4C9,H2AC14,H2AC6,H2AC4,H2AC20,H2BC13,H2BC15,H2BC14,H2BC9,H2BC17,H2BC21,H4C1,H4C4,H4C6,H4C12,H4C3,H4C8,H4C2,H4C5,H4C13,H2BC11,H2BC12,H4-16,H2BU1
1_Member	Reactome Gene Sets	R-HSA-8878171	Transcriptional regulation by RUNX1	-32.581	-30.0336	45/239	1021,3012,3013,3017,3018,8294,8331,8334,8335,8338,8340,8341,8342,8345,8348,8349,8350,8351,8352,8353,8354,8355,8356,8357,8358,8359,8360,8361,8362,8364,8365,8366,8367,8368,8968,8970,9021,23112,23466,26523,27161,85236,121504,128312,653604	CDK6,H2AC8,H2AC7,H2BC5,H2BC3,H4C9,H2AC14,H2AC6,H2AC4,H2AC20,H2BC13,H2BC15,H2BC14,H2BC9,H2BC17,H2BC21,H3C1,H3C4,H3C3,H3C6,H3C11,H3C8,H3C12,H3C10,H3C2,H4C1,H4C4,H4C6,H4C12,H4C3,H4C8,H4C2,H4C5,H4C13,H3C7,H2BC11,SOCS3,TNRC6B,CBX6,AGO1,AGO2,H2BC12,H4-16,H2BU1,H3C13
1_Member	Reactome Gene Sets	R-HSA-9006931	Signaling by Nuclear Receptors	-32.485	-29.9445	49/299	1839,2194,2353,2354,2790,3012,3013,3017,3018,8294,8331,8334,8335,8338,8340,8341,8342,8345,8348,8349,8350,8351,8352,8353,8354,8355,8356,8357,8358,8359,8360,8361,8362,8364,8365,8366,8367,8368,8968,8970,23112,26523,27161,57665,85236,121504,128312,340665,653604	HBEGF,FASN,FOS,FOSB,GNG10,H2AC8,H2AC7,H2BC5,H2BC3,H4C9,H2AC14,H2AC6,H2AC4,H2AC20,H2BC13,H2BC15,H2BC14,H2BC9,H2BC17,H2BC21,H3C1,H3C4,H3C3,H3C6,H3C11,H3C8,H3C12,H3C10,H3C2,H4C1,H4C4,H4C6,H4C12,H4C3,H4C8,H4C2,H4C5,H4C13,H3C7,H2BC11,TNRC6B,AGO1,AGO2,RDH14,H2BC12,H4-16,H2BU1,CYP26C1,H3C13
1_Member	GO Biological Processes	GO:0034728	nucleosome organization	-32.289	-29.7552	40/177	3006,3007,3008,3009,3017,3018,8294,8340,8341,8342,8345,8348,8349,8350,8351,8352,8353,8354,8355,8356,8357,8358,8359,8360,8361,8362,8364,8365,8366,8367,8368,8968,8970,54891,85236,92815,121504,128312,440689,653604	H1-2,H1-3,H1-4,H1-5,H2BC5,H2BC3,H4C9,H2BC13,H2BC15,H2BC14,H2BC9,H2BC17,H2BC21,H3C1,H3C4,H3C3,H3C6,H3C11,H3C8,H3C12,H3C10,H3C2,H4C1,H4C4,H4C6,H4C12,H4C3,H4C8,H4C2,H4C5,H4C13,H3C7,H2BC11,INO80D,H2BC12,H2AW,H4-16,H2BU1,H2BC18,H3C13
1_Member	Reactome Gene Sets	R-HSA-73929	Base-Excision Repair, AP Site Formation	-32.202	-29.6748	28/63	3012,3013,3017,3018,8294,8331,8334,8335,8338,8340,8341,8342,8345,8348,8349,8359,8360,8361,8362,8364,8365,8366,8367,8368,8970,85236,121504,128312	H2AC8,H2AC7,H2BC5,H2BC3,H4C9,H2AC14,H2AC6,H2AC4,H2AC20,H2BC13,H2BC15,H2BC14,H2BC9,H2BC17,H2BC21,H4C1,H4C4,H4C6,H4C12,H4C3,H4C8,H4C2,H4C5,H4C13,H2BC11,H2BC12,H4-16,H2BU1
1_Member	GO Biological Processes	GO:0031497	chromatin assembly	-31.239	-28.7183	39/175	3006,3007,3008,3009,3017,3018,8294,8340,8341,8342,8345,8348,8349,8350,8351,8352,8353,8354,8355,8356,8357,8358,8359,8360,8361,8362,8364,8365,8366,8367,8368,8968,8970,85236,121504,128312,201161,440689,653604	H1-2,H1-3,H1-4,H1-5,H2BC5,H2BC3,H4C9,H2BC13,H2BC15,H2BC14,H2BC9,H2BC17,H2BC21,H3C1,H3C4,H3C3,H3C6,H3C11,H3C8,H3C12,H3C10,H3C2,H4C1,H4C4,H4C6,H4C12,H4C3,H4C8,H4C2,H4C5,H4C13,H3C7,H2BC11,H2BC12,H4-16,H2BU1,CENPV,H2BC18,H3C13
1_Member	Reactome Gene Sets	R-HSA-9670095	Inhibition of DNA recombination at telomere	-31.0365	-28.5223	28/68	3012,3013,3017,3018,8294,8331,8334,8335,8338,8340,8341,8342,8345,8348,8349,8359,8360,8361,8362,8364,8365,8366,8367,8368,8970,85236,121504,128312	H2AC8,H2AC7,H2BC5,H2BC3,H4C9,H2AC14,H2AC6,H2AC4,H2AC20,H2BC13,H2BC15,H2BC14,H2BC9,H2BC17,H2BC21,H4C1,H4C4,H4C6,H4C12,H4C3,H4C8,H4C2,H4C5,H4C13,H2BC11,H2BC12,H4-16,H2BU1
1_Member	Reactome Gene Sets	R-HSA-69306	DNA Replication	-30.9926	-28.4848	40/190	3012,3013,3017,3018,8294,8331,8334,8335,8338,8340,8341,8342,8345,8348,8349,8350,8351,8352,8353,8354,8355,8356,8357,8358,8359,8360,8361,8362,8364,8365,8366,8367,8368,8968,8970,23633,85236,121504,128312,653604	H2AC8,H2AC7,H2BC5,H2BC3,H4C9,H2AC14,H2AC6,H2AC4,H2AC20,H2BC13,H2BC15,H2BC14,H2BC9,H2BC17,H2BC21,H3C1,H3C4,H3C3,H3C6,H3C11,H3C8,H3C12,H3C10,H3C2,H4C1,H4C4,H4C6,H4C12,H4C3,H4C8,H4C2,H4C5,H4C13,H3C7,H2BC11,KPNA6,H2BC12,H4-16,H2BU1,H3C13
1_Member	Reactome Gene Sets	R-HSA-201681	TCF dependent signaling in response to WNT	-30.7599	-28.2583	43/233	1454,2535,3012,3013,3017,3018,6657,7474,8294,8331,8334,8335,8338,8340,8341,8342,8345,8348,8349,8350,8351,8352,8353,8354,8355,8356,8357,8358,8359,8360,8361,8362,8364,8365,8366,8367,8368,8968,8970,85236,121504,128312,653604	CSNK1E,FZD2,H2AC8,H2AC7,H2BC5,H2BC3,SOX2,WNT5A,H4C9,H2AC14,H2AC6,H2AC4,H2AC20,H2BC13,H2BC15,H2BC14,H2BC9,H2BC17,H2BC21,H3C1,H3C4,H3C3,H3C6,H3C11,H3C8,H3C12,H3C10,H3C2,H4C1,H4C4,H4C6,H4C12,H4C3,H4C8,H4C2,H4C5,H4C13,H3C7,H2BC11,H2BC12,H4-16,H2BU1,H3C13
1_Member	GO Biological Processes	GO:0006333	chromatin assembly or disassembly	-30.5222	-28.0267	40/195	3006,3007,3008,3009,3017,3018,8294,8340,8341,8342,8345,8348,8349,8350,8351,8352,8353,8354,8355,8356,8357,8358,8359,8360,8361,8362,8364,8365,8366,8367,8368,8968,8970,85236,92815,121504,128312,201161,440689,653604	H1-2,H1-3,H1-4,H1-5,H2BC5,H2BC3,H4C9,H2BC13,H2BC15,H2BC14,H2BC9,H2BC17,H2BC21,H3C1,H3C4,H3C3,H3C6,H3C11,H3C8,H3C12,H3C10,H3C2,H4C1,H4C4,H4C6,H4C12,H4C3,H4C8,H4C2,H4C5,H4C13,H3C7,H2BC11,H2BC12,H2AW,H4-16,H2BU1,CENPV,H2BC18,H3C13
1_Member	GO Biological Processes	GO:0065004	protein-DNA complex assembly	-30.0592	-27.5698	39/187	3006,3007,3008,3009,3017,3018,8294,8340,8341,8342,8345,8348,8349,8350,8351,8352,8353,8354,8355,8356,8357,8358,8359,8360,8361,8362,8364,8365,8366,8367,8368,8968,8970,85236,121504,128312,201161,440689,653604	H1-2,H1-3,H1-4,H1-5,H2BC5,H2BC3,H4C9,H2BC13,H2BC15,H2BC14,H2BC9,H2BC17,H2BC21,H3C1,H3C4,H3C3,H3C6,H3C11,H3C8,H3C12,H3C10,H3C2,H4C1,H4C4,H4C6,H4C12,H4C3,H4C8,H4C2,H4C5,H4C13,H3C7,H2BC11,H2BC12,H4-16,H2BU1,CENPV,H2BC18,H3C13
1_Member	Reactome Gene Sets	R-HSA-606279	Deposition of new CENPA-containing nucleosomes at the centromere	-29.7815	-27.304	28/74	3012,3013,3017,3018,8294,8331,8334,8335,8338,8340,8341,8342,8345,8348,8349,8359,8360,8361,8362,8364,8365,8366,8367,8368,8970,85236,121504,128312	H2AC8,H2AC7,H2BC5,H2BC3,H4C9,H2AC14,H2AC6,H2AC4,H2AC20,H2BC13,H2BC15,H2BC14,H2BC9,H2BC17,H2BC21,H4C1,H4C4,H4C6,H4C12,H4C3,H4C8,H4C2,H4C5,H4C13,H2BC11,H2BC12,H4-16,H2BU1
1_Member	Reactome Gene Sets	R-HSA-774815	Nucleosome assembly	-29.7815	-27.304	28/74	3012,3013,3017,3018,8294,8331,8334,8335,8338,8340,8341,8342,8345,8348,8349,8359,8360,8361,8362,8364,8365,8366,8367,8368,8970,85236,121504,128312	H2AC8,H2AC7,H2BC5,H2BC3,H4C9,H2AC14,H2AC6,H2AC4,H2AC20,H2BC13,H2BC15,H2BC14,H2BC9,H2BC17,H2BC21,H4C1,H4C4,H4C6,H4C12,H4C3,H4C8,H4C2,H4C5,H4C13,H2BC11,H2BC12,H4-16,H2BU1
1_Member	Reactome Gene Sets	R-HSA-2262752	Cellular responses to stress	-29.2981	-26.8265	69/757	817,1021,1968,2353,2936,3006,3007,3008,3009,3012,3013,3017,3018,3304,4193,4194,4217,5600,6146,6170,6171,6218,6228,8294,8331,8334,8335,8338,8340,8341,8342,8345,8348,8349,8350,8351,8352,8353,8354,8355,8356,8357,8358,8359,8360,8361,8362,8364,8365,8366,8367,8368,8968,8970,8994,9997,23112,23466,26523,51241,85236,112398,116228,118460,121504,128312,155066,285521,653604	CAMK2D,CDK6,EIF2S3,FOS,GSR,H1-2,H1-3,H1-4,H1-5,H2AC8,H2AC7,H2BC5,H2BC3,HSPA1B,MDM2,MDM4,MAP3K5,MAPK11,RPL22,RPL39,RPL41,RPS17,RPS23,H4C9,H2AC14,H2AC6,H2AC4,H2AC20,H2BC13,H2BC15,H2BC14,H2BC9,H2BC17,H2BC21,H3C1,H3C4,H3C3,H3C6,H3C11,H3C8,H3C12,H3C10,H3C2,H4C1,H4C4,H4C6,H4C12,H4C3,H4C8,H4C2,H4C5,H4C13,H3C7,H2BC11,LIMD1,SCO2,TNRC6B,CBX6,AGO1,COX16,H2BC12,EGLN2,COX20,EXOSC6,H4-16,H2BU1,ATP6V0E2,COX18,H…
1_Member	GO Biological Processes	GO:0006338	chromatin remodeling	-29.291	-26.8251	44/267	3006,3007,3008,3009,3017,3018,8242,8294,8340,8341,8342,8345,8348,8349,8350,8351,8352,8353,8354,8355,8356,8357,8358,8359,8360,8361,8362,8364,8365,8366,8367,8368,8968,8970,9759,10360,54891,85236,92815,121504,128312,201161,440689,653604	H1-2,H1-3,H1-4,H1-5,H2BC5,H2BC3,KDM5C,H4C9,H2BC13,H2BC15,H2BC14,H2BC9,H2BC17,H2BC21,H3C1,H3C4,H3C3,H3C6,H3C11,H3C8,H3C12,H3C10,H3C2,H4C1,H4C4,H4C6,H4C12,H4C3,H4C8,H4C2,H4C5,H4C13,H3C7,H2BC11,HDAC4,NPM3,INO80D,H2BC12,H2AW,H4-16,H2BU1,CENPV,H2BC18,H3C13
1_Member	Reactome Gene Sets	R-HSA-195721	Signaling by WNT	-29.2548	-26.7946	48/332	1454,2535,2790,3012,3013,3017,3018,6657,7474,8294,8331,8334,8335,8338,8340,8341,8342,8345,8348,8349,8350,8351,8352,8353,8354,8355,8356,8357,8358,8359,8360,8361,8362,8364,8365,8366,8367,8368,8968,8970,23112,23236,26523,27161,85236,121504,128312,653604	CSNK1E,FZD2,GNG10,H2AC8,H2AC7,H2BC5,H2BC3,SOX2,WNT5A,H4C9,H2AC14,H2AC6,H2AC4,H2AC20,H2BC13,H2BC15,H2BC14,H2BC9,H2BC17,H2BC21,H3C1,H3C4,H3C3,H3C6,H3C11,H3C8,H3C12,H3C10,H3C2,H4C1,H4C4,H4C6,H4C12,H4C3,H4C8,H4C2,H4C5,H4C13,H3C7,H2BC11,TNRC6B,PLCB1,AGO1,AGO2,H2BC12,H4-16,H2BU1,H3C13
1_Member	GO Biological Processes	GO:0006335	DNA replication-dependent chromatin assembly	-29.223	-26.7739	21/32	8294,8350,8351,8352,8353,8354,8355,8356,8357,8358,8359,8360,8361,8362,8364,8365,8366,8367,8368,8968,121504	H4C9,H3C1,H3C4,H3C3,H3C6,H3C11,H3C8,H3C12,H3C10,H3C2,H4C1,H4C4,H4C6,H4C12,H4C3,H4C8,H4C2,H4C5,H4C13,H3C7,H4-16
1_Member	GO Biological Processes	GO:0034723	DNA replication-dependent chromatin organization	-29.223	-26.7739	21/32	8294,8350,8351,8352,8353,8354,8355,8356,8357,8358,8359,8360,8361,8362,8364,8365,8366,8367,8368,8968,121504	H4C9,H3C1,H3C4,H3C3,H3C6,H3C11,H3C8,H3C12,H3C10,H3C2,H4C1,H4C4,H4C6,H4C12,H4C3,H4C8,H4C2,H4C5,H4C13,H3C7,H4-16
1_Member	Reactome Gene Sets	R-HSA-1221632	Meiotic synapsis	-28.8338	-26.3902	28/79	3012,3013,3017,3018,8294,8331,8334,8335,8338,8340,8341,8342,8345,8348,8349,8359,8360,8361,8362,8364,8365,8366,8367,8368,8970,85236,121504,128312	H2AC8,H2AC7,H2BC5,H2BC3,H4C9,H2AC14,H2AC6,H2AC4,H2AC20,H2BC13,H2BC15,H2BC14,H2BC9,H2BC17,H2BC21,H4C1,H4C4,H4C6,H4C12,H4C3,H4C8,H4C2,H4C5,H4C13,H2BC11,H2BC12,H4-16,H2BU1
1_Member	Reactome Gene Sets	R-HSA-8953897	Cellular responses to stimuli	-28.8148	-26.3766	69/771	817,1021,1968,2353,2936,3006,3007,3008,3009,3012,3013,3017,3018,3304,4193,4194,4217,5600,6146,6170,6171,6218,6228,8294,8331,8334,8335,8338,8340,8341,8342,8345,8348,8349,8350,8351,8352,8353,8354,8355,8356,8357,8358,8359,8360,8361,8362,8364,8365,8366,8367,8368,8968,8970,8994,9997,23112,23466,26523,51241,85236,112398,116228,118460,121504,128312,155066,285521,653604	CAMK2D,CDK6,EIF2S3,FOS,GSR,H1-2,H1-3,H1-4,H1-5,H2AC8,H2AC7,H2BC5,H2BC3,HSPA1B,MDM2,MDM4,MAP3K5,MAPK11,RPL22,RPL39,RPL41,RPS17,RPS23,H4C9,H2AC14,H2AC6,H2AC4,H2AC20,H2BC13,H2BC15,H2BC14,H2BC9,H2BC17,H2BC21,H3C1,H3C4,H3C3,H3C6,H3C11,H3C8,H3C12,H3C10,H3C2,H4C1,H4C4,H4C6,H4C12,H4C3,H4C8,H4C2,H4C5,H4C13,H3C7,H2BC11,LIMD1,SCO2,TNRC6B,CBX6,AGO1,COX16,H2BC12,EGLN2,COX20,EXOSC6,H4-16,H2BU1,ATP6V0E2,COX18,H…
1_Member	GO Biological Processes	GO:0071824	protein-DNA complex subunit organization	-27.9519	-25.519	41/240	3006,3007,3008,3009,3017,3018,8294,8340,8341,8342,8345,8348,8349,8350,8351,8352,8353,8354,8355,8356,8357,8358,8359,8360,8361,8362,8364,8365,8366,8367,8368,8968,8970,54891,85236,92815,121504,128312,201161,440689,653604	H1-2,H1-3,H1-4,H1-5,H2BC5,H2BC3,H4C9,H2BC13,H2BC15,H2BC14,H2BC9,H2BC17,H2BC21,H3C1,H3C4,H3C3,H3C6,H3C11,H3C8,H3C12,H3C10,H3C2,H4C1,H4C4,H4C6,H4C12,H4C3,H4C8,H4C2,H4C5,H4C13,H3C7,H2BC11,INO80D,H2BC12,H2AW,H4-16,H2BU1,CENPV,H2BC18,H3C13
1_Member	GO Biological Processes	GO:0006323	DNA packaging	-27.3908	-24.9632	39/218	3006,3007,3008,3009,3017,3018,8294,8340,8341,8342,8345,8348,8349,8350,8351,8352,8353,8354,8355,8356,8357,8358,8359,8360,8361,8362,8364,8365,8366,8367,8368,8968,8970,85236,121504,128312,201161,440689,653604	H1-2,H1-3,H1-4,H1-5,H2BC5,H2BC3,H4C9,H2BC13,H2BC15,H2BC14,H2BC9,H2BC17,H2BC21,H3C1,H3C4,H3C3,H3C6,H3C11,H3C8,H3C12,H3C10,H3C2,H4C1,H4C4,H4C6,H4C12,H4C3,H4C8,H4C2,H4C5,H4C13,H3C7,H2BC11,H2BC12,H4-16,H2BU1,CENPV,H2BC18,H3C13
1_Member	Reactome Gene Sets	R-HSA-3214842	HDMs demethylate histones	-26.978	-24.5556	23/50	8242,8294,8350,8351,8352,8353,8354,8355,8356,8357,8358,8359,8360,8361,8362,8364,8365,8366,8367,8368,8968,121504,653604	KDM5C,H4C9,H3C1,H3C4,H3C3,H3C6,H3C11,H3C8,H3C12,H3C10,H3C2,H4C1,H4C4,H4C6,H4C12,H4C3,H4C8,H4C2,H4C5,H4C13,H3C7,H4-16,H3C13
1_Member	Reactome Gene Sets	R-HSA-73884	Base Excision Repair	-26.6927	-24.2755	28/92	3012,3013,3017,3018,8294,8331,8334,8335,8338,8340,8341,8342,8345,8348,8349,8359,8360,8361,8362,8364,8365,8366,8367,8368,8970,85236,121504,128312	H2AC8,H2AC7,H2BC5,H2BC3,H4C9,H2AC14,H2AC6,H2AC4,H2AC20,H2BC13,H2BC15,H2BC14,H2BC9,H2BC17,H2BC21,H4C1,H4C4,H4C6,H4C12,H4C3,H4C8,H4C2,H4C5,H4C13,H2BC11,H2BC12,H4-16,H2BU1
1_Member	Reactome Gene Sets	R-HSA-157579	Telomere Maintenance	-23.9296	-21.5174	28/113	3012,3013,3017,3018,8294,8331,8334,8335,8338,8340,8341,8342,8345,8348,8349,8359,8360,8361,8362,8364,8365,8366,8367,8368,8970,85236,121504,128312	H2AC8,H2AC7,H2BC5,H2BC3,H4C9,H2AC14,H2AC6,H2AC4,H2AC20,H2BC13,H2BC15,H2BC14,H2BC9,H2BC17,H2BC21,H4C1,H4C4,H4C6,H4C12,H4C3,H4C8,H4C2,H4C5,H4C13,H2BC11,H2BC12,H4-16,H2BU1
1_Member	Reactome Gene Sets	R-HSA-195258	RHO GTPase Effectors	-23.5553	-21.1481	42/327	3012,3013,3017,3018,4771,5600,8294,8331,8334,8335,8338,8340,8341,8342,8345,8348,8349,8350,8351,8352,8353,8354,8355,8356,8357,8358,8359,8360,8361,8362,8364,8365,8366,8367,8368,8968,8970,30851,85236,121504,128312,653604	H2AC8,H2AC7,H2BC5,H2BC3,NF2,MAPK11,H4C9,H2AC14,H2AC6,H2AC4,H2AC20,H2BC13,H2BC15,H2BC14,H2BC9,H2BC17,H2BC21,H3C1,H3C4,H3C3,H3C6,H3C11,H3C8,H3C12,H3C10,H3C2,H4C1,H4C4,H4C6,H4C12,H4C3,H4C8,H4C2,H4C5,H4C13,H3C7,H2BC11,TAX1BP3,H2BC12,H4-16,H2BU1,H3C13
1_Member	Reactome Gene Sets	R-HSA-5693565	Recruitment and ATM-mediated phosphorylation of repair and signaling proteins at DNA double strand breaks	-23.2373	-20.8351	24/77	2140,3017,3018,8294,8340,8341,8342,8345,8348,8349,8359,8360,8361,8362,8364,8365,8366,8367,8368,8970,51588,85236,121504,128312	EYA3,H2BC5,H2BC3,H4C9,H2BC13,H2BC15,H2BC14,H2BC9,H2BC17,H2BC21,H4C1,H4C4,H4C6,H4C12,H4C3,H4C8,H4C2,H4C5,H4C13,H2BC11,PIAS4,H2BC12,H4-16,H2BU1
1_Member	Reactome Gene Sets	R-HSA-5693606	DNA Double Strand Break Response	-23.0845	-20.6872	24/78	2140,3017,3018,8294,8340,8341,8342,8345,8348,8349,8359,8360,8361,8362,8364,8365,8366,8367,8368,8970,51588,85236,121504,128312	EYA3,H2BC5,H2BC3,H4C9,H2BC13,H2BC15,H2BC14,H2BC9,H2BC17,H2BC21,H4C1,H4C4,H4C6,H4C12,H4C3,H4C8,H4C2,H4C5,H4C13,H2BC11,PIAS4,H2BC12,H4-16,H2BU1
1_Member	Reactome Gene Sets	R-HSA-5693571	Nonhomologous End-Joining (NHEJ)	-23.062	-20.6696	23/69	3017,3018,8294,8340,8341,8342,8345,8348,8349,8359,8360,8361,8362,8364,8365,8366,8367,8368,8970,51588,85236,121504,128312	H2BC5,H2BC3,H4C9,H2BC13,H2BC15,H2BC14,H2BC9,H2BC17,H2BC21,H4C1,H4C4,H4C6,H4C12,H4C3,H4C8,H4C2,H4C5,H4C13,H2BC11,PIAS4,H2BC12,H4-16,H2BU1
1_Member	WikiPathways	WP2369	Histone modifications	-21.438	-19.0503	22/70	8294,8350,8351,8352,8353,8354,8355,8356,8357,8358,8359,8360,8361,8362,8364,8365,8366,8367,8368,8968,121504,653604	H4C9,H3C1,H3C4,H3C3,H3C6,H3C11,H3C8,H3C12,H3C10,H3C2,H4C1,H4C4,H4C6,H4C12,H4C3,H4C8,H4C2,H4C5,H4C13,H3C7,H4-16,H3C13
1_Member	GO Biological Processes	GO:0071103	DNA conformation change	-21.3617	-18.9788	39/314	3006,3007,3008,3009,3017,3018,8294,8340,8341,8342,8345,8348,8349,8350,8351,8352,8353,8354,8355,8356,8357,8358,8359,8360,8361,8362,8364,8365,8366,8367,8368,8968,8970,85236,121504,128312,201161,440689,653604	H1-2,H1-3,H1-4,H1-5,H2BC5,H2BC3,H4C9,H2BC13,H2BC15,H2BC14,H2BC9,H2BC17,H2BC21,H3C1,H3C4,H3C3,H3C6,H3C11,H3C8,H3C12,H3C10,H3C2,H4C1,H4C4,H4C6,H4C12,H4C3,H4C8,H4C2,H4C5,H4C13,H3C7,H2BC11,H2BC12,H4-16,H2BU1,CENPV,H2BC18,H3C13
1_Member	Reactome Gene Sets	R-HSA-3214841	PKMTs methylate histone lysines	-21.2838	-18.9056	22/71	8294,8350,8351,8352,8353,8354,8355,8356,8357,8358,8359,8360,8361,8362,8364,8365,8366,8367,8368,8968,121504,653604	H4C9,H3C1,H3C4,H3C3,H3C6,H3C11,H3C8,H3C12,H3C10,H3C2,H4C1,H4C4,H4C6,H4C12,H4C3,H4C8,H4C2,H4C5,H4C13,H3C7,H4-16,H3C13
1_Member	Reactome Gene Sets	R-HSA-73886	Chromosome Maintenance	-21.0908	-18.7173	28/141	3012,3013,3017,3018,8294,8331,8334,8335,8338,8340,8341,8342,8345,8348,8349,8359,8360,8361,8362,8364,8365,8366,8367,8368,8970,85236,121504,128312	H2AC8,H2AC7,H2BC5,H2BC3,H4C9,H2AC14,H2AC6,H2AC4,H2AC20,H2BC13,H2BC15,H2BC14,H2BC9,H2BC17,H2BC21,H4C1,H4C4,H4C6,H4C12,H4C3,H4C8,H4C2,H4C5,H4C13,H2BC11,H2BC12,H4-16,H2BU1
1_Member	GO Biological Processes	GO:0006325	chromatin organization	-20.5051	-18.1361	50/569	2140,3006,3007,3008,3009,3017,3018,6657,8242,8294,8340,8341,8342,8345,8348,8349,8350,8351,8352,8353,8354,8355,8356,8357,8358,8359,8360,8361,8362,8364,8365,8366,8367,8368,8968,8970,9759,10360,23466,54891,64783,80312,85236,85460,92815,121504,128312,201161,440689,653604	EYA3,H1-2,H1-3,H1-4,H1-5,H2BC5,H2BC3,SOX2,KDM5C,H4C9,H2BC13,H2BC15,H2BC14,H2BC9,H2BC17,H2BC21,H3C1,H3C4,H3C3,H3C6,H3C11,H3C8,H3C12,H3C10,H3C2,H4C1,H4C4,H4C6,H4C12,H4C3,H4C8,H4C2,H4C5,H4C13,H3C7,H2BC11,HDAC4,NPM3,CBX6,INO80D,RBM15,TET1,H2BC12,ZNF518B,H2AW,H4-16,H2BU1,CENPV,H2BC18,H3C13
1_Member	Reactome Gene Sets	R-HSA-69473	G2/M DNA damage checkpoint	-19.5065	-17.1421	23/95	3017,3018,8294,8340,8341,8342,8345,8348,8349,8359,8360,8361,8362,8364,8365,8366,8367,8368,8970,51588,85236,121504,128312	H2BC5,H2BC3,H4C9,H2BC13,H2BC15,H2BC14,H2BC9,H2BC17,H2BC21,H4C1,H4C4,H4C6,H4C12,H4C3,H4C8,H4C2,H4C5,H4C13,H2BC11,PIAS4,H2BC12,H4-16,H2BU1
1_Member	Reactome Gene Sets	R-HSA-5693607	Processing of DNA double-strand break ends	-19.1745	-16.8146	23/98	3017,3018,8294,8340,8341,8342,8345,8348,8349,8359,8360,8361,8362,8364,8365,8366,8367,8368,8970,51588,85236,121504,128312	H2BC5,H2BC3,H4C9,H2BC13,H2BC15,H2BC14,H2BC9,H2BC17,H2BC21,H4C1,H4C4,H4C6,H4C12,H4C3,H4C8,H4C2,H4C5,H4C13,H2BC11,PIAS4,H2BC12,H4-16,H2BU1
1_Member	Reactome Gene Sets	R-HSA-68886	M Phase	-17.7632	-15.4077	40/418	1454,3012,3013,3017,3018,8294,8331,8334,8335,8338,8340,8341,8342,8345,8348,8349,8350,8351,8352,8353,8354,8355,8356,8357,8358,8359,8360,8361,8362,8364,8365,8366,8367,8368,8968,8970,85236,121504,128312,653604	CSNK1E,H2AC8,H2AC7,H2BC5,H2BC3,H4C9,H2AC14,H2AC6,H2AC4,H2AC20,H2BC13,H2BC15,H2BC14,H2BC9,H2BC17,H2BC21,H3C1,H3C4,H3C3,H3C6,H3C11,H3C8,H3C12,H3C10,H3C2,H4C1,H4C4,H4C6,H4C12,H4C3,H4C8,H4C2,H4C5,H4C13,H3C7,H2BC11,H2BC12,H4-16,H2BU1,H3C13
1_Member	Reactome Gene Sets	R-HSA-194315	Signaling by Rho GTPases	-17.215	-14.8639	51/707	613,708,2802,3012,3013,3017,3018,3954,4771,5600,8294,8331,8334,8335,8338,8340,8341,8342,8345,8348,8349,8350,8351,8352,8353,8354,8355,8356,8357,8358,8359,8360,8361,8362,8364,8365,8366,8367,8368,8968,8970,9497,23370,30851,54438,55200,84144,85236,121504,128312,653604	BCR,C1QBP,GOLGA3,H2AC8,H2AC7,H2BC5,H2BC3,LETM1,NF2,MAPK11,H4C9,H2AC14,H2AC6,H2AC4,H2AC20,H2BC13,H2BC15,H2BC14,H2BC9,H2BC17,H2BC21,H3C1,H3C4,H3C3,H3C6,H3C11,H3C8,H3C12,H3C10,H3C2,H4C1,H4C4,H4C6,H4C12,H4C3,H4C8,H4C2,H4C5,H4C13,H3C7,H2BC11,SLC4A7,ARHGEF18,TAX1BP3,GFOD1,PLEKHG6,SYDE2,H2BC12,H4-16,H2BU1,H3C13
1_Member	Reactome Gene Sets	R-HSA-9716542	Signaling by Rho GTPases, Miro GTPases and RHOBTB3	-16.8093	-14.4626	51/723	613,708,2802,3012,3013,3017,3018,3954,4771,5600,8294,8331,8334,8335,8338,8340,8341,8342,8345,8348,8349,8350,8351,8352,8353,8354,8355,8356,8357,8358,8359,8360,8361,8362,8364,8365,8366,8367,8368,8968,8970,9497,23370,30851,54438,55200,84144,85236,121504,128312,653604	BCR,C1QBP,GOLGA3,H2AC8,H2AC7,H2BC5,H2BC3,LETM1,NF2,MAPK11,H4C9,H2AC14,H2AC6,H2AC4,H2AC20,H2BC13,H2BC15,H2BC14,H2BC9,H2BC17,H2BC21,H3C1,H3C4,H3C3,H3C6,H3C11,H3C8,H3C12,H3C10,H3C2,H4C1,H4C4,H4C6,H4C12,H4C3,H4C8,H4C2,H4C5,H4C13,H3C7,H2BC11,SLC4A7,ARHGEF18,TAX1BP3,GFOD1,PLEKHG6,SYDE2,H2BC12,H4-16,H2BU1,H3C13
1_Member	GO Biological Processes	GO:0032200	telomere organization	-16.765	-14.4226	22/110	7012,8294,8350,8351,8352,8353,8354,8355,8356,8357,8358,8359,8360,8361,8362,8364,8365,8366,8367,8368,8968,121504	TERC,H4C9,H3C1,H3C4,H3C3,H3C6,H3C11,H3C8,H3C12,H3C10,H3C2,H4C1,H4C4,H4C6,H4C12,H4C3,H4C8,H4C2,H4C5,H4C13,H3C7,H4-16
1_Member	Reactome Gene Sets	R-HSA-5693567	HDR through Homologous Recombination (HRR) or Single Strand Annealing (SSA)	-16.0992	-13.7654	23/132	3017,3018,8294,8340,8341,8342,8345,8348,8349,8359,8360,8361,8362,8364,8365,8366,8367,8368,8970,51588,85236,121504,128312	H2BC5,H2BC3,H4C9,H2BC13,H2BC15,H2BC14,H2BC9,H2BC17,H2BC21,H4C1,H4C4,H4C6,H4C12,H4C3,H4C8,H4C2,H4C5,H4C13,H2BC11,PIAS4,H2BC12,H4-16,H2BU1
1_Member	Reactome Gene Sets	R-HSA-5693538	Homology Directed Repair	-15.6557	-13.3302	23/138	3017,3018,8294,8340,8341,8342,8345,8348,8349,8359,8360,8361,8362,8364,8365,8366,8367,8368,8970,51588,85236,121504,128312	H2BC5,H2BC3,H4C9,H2BC13,H2BC15,H2BC14,H2BC9,H2BC17,H2BC21,H4C1,H4C4,H4C6,H4C12,H4C3,H4C8,H4C2,H4C5,H4C13,H2BC11,PIAS4,H2BC12,H4-16,H2BU1
1_Member	GO Biological Processes	GO:0045653	negative regulation of megakaryocyte differentiation	-15.0142	-12.6969	11/18	8294,8359,8360,8361,8362,8364,8365,8366,8367,8368,121504	H4C9,H4C1,H4C4,H4C6,H4C12,H4C3,H4C8,H4C2,H4C5,H4C13,H4-16
1_Member	Reactome Gene Sets	R-HSA-5693532	DNA Double-Strand Break Repair	-14.7963	-12.4831	24/167	2140,3017,3018,8294,8340,8341,8342,8345,8348,8349,8359,8360,8361,8362,8364,8365,8366,8367,8368,8970,51588,85236,121504,128312	EYA3,H2BC5,H2BC3,H4C9,H2BC13,H2BC15,H2BC14,H2BC9,H2BC17,H2BC21,H4C1,H4C4,H4C6,H4C12,H4C3,H4C8,H4C2,H4C5,H4C13,H2BC11,PIAS4,H2BC12,H4-16,H2BU1
1_Member	KEGG Pathway	hsa05203	Viral carcinogenesis	-14.6859	-12.3767	26/204	1021,3017,3018,4193,8294,8340,8341,8342,8345,8348,8349,8359,8360,8361,8362,8364,8365,8366,8367,8368,8970,9759,85236,121504,128312,440689	CDK6,H2BC5,H2BC3,MDM2,H4C9,H2BC13,H2BC15,H2BC14,H2BC9,H2BC17,H2BC21,H4C1,H4C4,H4C6,H4C12,H4C3,H4C8,H4C2,H4C5,H4C13,H2BC11,HDAC4,H2BC12,H4-16,H2BU1,H2BC18
1_Member	Reactome Gene Sets	R-HSA-73894	DNA Repair	-14.2832	-11.9779	32/335	2140,3012,3013,3017,3018,8294,8331,8334,8335,8338,8340,8341,8342,8345,8348,8349,8359,8360,8361,8362,8364,8365,8366,8367,8368,8970,9636,51588,54891,85236,121504,128312	EYA3,H2AC8,H2AC7,H2BC5,H2BC3,H4C9,H2AC14,H2AC6,H2AC4,H2AC20,H2BC13,H2BC15,H2BC14,H2BC9,H2BC17,H2BC21,H4C1,H4C4,H4C6,H4C12,H4C3,H4C8,H4C2,H4C5,H4C13,H2BC11,ISG15,PIAS4,INO80D,H2BC12,H4-16,H2BU1
1_Member	Reactome Gene Sets	R-HSA-69278	Cell Cycle, Mitotic	-14.1205	-11.8191	41/560	1021,1454,3012,3013,3017,3018,8294,8331,8334,8335,8338,8340,8341,8342,8345,8348,8349,8350,8351,8352,8353,8354,8355,8356,8357,8358,8359,8360,8361,8362,8364,8365,8366,8367,8368,8968,8970,85236,121504,128312,653604	CDK6,CSNK1E,H2AC8,H2AC7,H2BC5,H2BC3,H4C9,H2AC14,H2AC6,H2AC4,H2AC20,H2BC13,H2BC15,H2BC14,H2BC9,H2BC17,H2BC21,H3C1,H3C4,H3C3,H3C6,H3C11,H3C8,H3C12,H3C10,H3C2,H4C1,H4C4,H4C6,H4C12,H4C3,H4C8,H4C2,H4C5,H4C13,H3C7,H2BC11,H2BC12,H4-16,H2BU1,H3C13
1_Member	GO Biological Processes	GO:0045652	regulation of megakaryocyte differentiation	-13.8131	-11.5157	13/36	3692,8294,8359,8360,8361,8362,8364,8365,8366,8367,8368,64783,121504	EIF6,H4C9,H4C1,H4C4,H4C6,H4C12,H4C3,H4C8,H4C2,H4C5,H4C13,RBM15,H4-16
1_Member	Reactome Gene Sets	R-HSA-69481	G2/M Checkpoints	-13.7962	-11.5026	23/167	3017,3018,8294,8340,8341,8342,8345,8348,8349,8359,8360,8361,8362,8364,8365,8366,8367,8368,8970,51588,85236,121504,128312	H2BC5,H2BC3,H4C9,H2BC13,H2BC15,H2BC14,H2BC9,H2BC17,H2BC21,H4C1,H4C4,H4C6,H4C12,H4C3,H4C8,H4C2,H4C5,H4C13,H2BC11,PIAS4,H2BC12,H4-16,H2BU1
1_Member	Reactome Gene Sets	R-HSA-1640170	Cell Cycle	-12.9782	-10.6884	44/691	1021,1454,3012,3013,3017,3018,4193,4194,8294,8331,8334,8335,8338,8340,8341,8342,8345,8348,8349,8350,8351,8352,8353,8354,8355,8356,8357,8358,8359,8360,8361,8362,8364,8365,8366,8367,8368,8968,8970,51588,85236,121504,128312,653604	CDK6,CSNK1E,H2AC8,H2AC7,H2BC5,H2BC3,MDM2,MDM4,H4C9,H2AC14,H2AC6,H2AC4,H2AC20,H2BC13,H2BC15,H2BC14,H2BC9,H2BC17,H2BC21,H3C1,H3C4,H3C3,H3C6,H3C11,H3C8,H3C12,H3C10,H3C2,H4C1,H4C4,H4C6,H4C12,H4C3,H4C8,H4C2,H4C5,H4C13,H3C7,H2BC11,PIAS4,H2BC12,H4-16,H2BU1,H3C13
1_Member	GO Biological Processes	GO:0006336	DNA replication-independent chromatin assembly	-11.3311	-9.04889	11/33	8294,8359,8360,8361,8362,8364,8365,8366,8367,8368,121504	H4C9,H4C1,H4C4,H4C6,H4C12,H4C3,H4C8,H4C2,H4C5,H4C13,H4-16
1_Member	GO Biological Processes	GO:0034724	DNA replication-independent chromatin organization	-11.1681	-8.88959	11/34	8294,8359,8360,8361,8362,8364,8365,8366,8367,8368,121504	H4C9,H4C1,H4C4,H4C6,H4C12,H4C3,H4C8,H4C2,H4C5,H4C13,H4-16
1_Member	GO Biological Processes	GO:0045638	negative regulation of myeloid cell differentiation	-10.3547	-8.09079	15/91	1021,8294,8359,8360,8361,8362,8364,8365,8366,8367,8368,64783,84959,121504,140685	CDK6,H4C9,H4C1,H4C4,H4C6,H4C12,H4C3,H4C8,H4C2,H4C5,H4C13,RBM15,UBASH3B,H4-16,ZBTB46
1_Member	Reactome Gene Sets	R-HSA-69620	Cell Cycle Checkpoints	-10.2174	-7.95703	25/293	3017,3018,4193,4194,8294,8340,8341,8342,8345,8348,8349,8359,8360,8361,8362,8364,8365,8366,8367,8368,8970,51588,85236,121504,128312	H2BC5,H2BC3,MDM2,MDM4,H4C9,H2BC13,H2BC15,H2BC14,H2BC9,H2BC17,H2BC21,H4C1,H4C4,H4C6,H4C12,H4C3,H4C8,H4C2,H4C5,H4C13,H2BC11,PIAS4,H2BC12,H4-16,H2BU1
1_Member	Reactome Gene Sets	R-HSA-4551638	SUMOylation of chromatin organization proteins	-8.53615	-6.27937	12/71	8294,8359,8360,8361,8362,8364,8365,8366,8367,8368,9759,121504	H4C9,H4C1,H4C4,H4C6,H4C12,H4C3,H4C8,H4C2,H4C5,H4C13,HDAC4,H4-16
1_Member	GO Biological Processes	GO:0045637	regulation of myeloid cell differentiation	-8.40099	-6.14772	19/208	1021,2353,3304,3692,8294,8359,8360,8361,8362,8364,8365,8366,8367,8368,9636,64783,84959,121504,140685	CDK6,FOS,HSPA1B,EIF6,H4C9,H4C1,H4C4,H4C6,H4C12,H4C3,H4C8,H4C2,H4C5,H4C13,ISG15,RBM15,UBASH3B,H4-16,ZBTB46
1_Member	WikiPathways	WP5114	Nucleotide excision repair in xeroderma pigmentosum	-8.18548	-5.93571	12/76	8294,8334,8359,8360,8361,8362,8364,8365,8366,8367,8368,121504	H4C9,H2AC6,H4C1,H4C4,H4C6,H4C12,H4C3,H4C8,H4C2,H4C5,H4C13,H4-16
1_Member	GO Biological Processes	GO:0006352	DNA-templated transcription, initiation	-8.03397	-5.78766	13/95	2975,8294,8359,8360,8361,8362,8364,8365,8366,8367,8368,57106,121504	GTF3C1,H4C9,H4C1,H4C4,H4C6,H4C12,H4C3,H4C8,H4C2,H4C5,H4C13,NAT14,H4-16
1_Member	GO Biological Processes	GO:0045596	negative regulation of cell differentiation	-6.89187	-4.65913	33/685	1021,1630,2301,2539,4133,4488,6608,6657,6664,7474,8200,8294,8359,8360,8361,8362,8364,8365,8366,8367,8368,8994,9759,25819,25937,53335,55079,58516,64783,84959,121504,140685,149041	CDK6,DCC,FOXE3,G6PD,MAP2,MSX2,SMO,SOX2,SOX11,WNT5A,GDF5,H4C9,H4C1,H4C4,H4C6,H4C12,H4C3,H4C8,H4C2,H4C5,H4C13,LIMD1,HDAC4,NOCT,WWTR1,BCL11A,FEZF2,SINHCAF,RBM15,UBASH3B,H4-16,ZBTB46,RC3H1
1_Member	Reactome Gene Sets	R-HSA-3108232	SUMO E3 ligases SUMOylate target proteins	-6.18576	-3.95635	15/182	3090,4193,8294,8359,8360,8361,8362,8364,8365,8366,8367,8368,9759,51588,121504	HIC1,MDM2,H4C9,H4C1,H4C4,H4C6,H4C12,H4C3,H4C8,H4C2,H4C5,H4C13,HDAC4,PIAS4,H4-16
1_Member	Reactome Gene Sets	R-HSA-2990846	SUMOylation	-6.00675	-3.78064	15/188	3090,4193,8294,8359,8360,8361,8362,8364,8365,8366,8367,8368,9759,51588,121504	HIC1,MDM2,H4C9,H4C1,H4C4,H4C6,H4C12,H4C3,H4C8,H4C2,H4C5,H4C13,HDAC4,PIAS4,H4-16
1_Member	GO Biological Processes	GO:0032774	RNA biosynthetic process	-5.71815	-3.5018	22/399	2301,2353,2354,2975,5442,6023,8294,8359,8360,8361,8362,8364,8365,8366,8367,8368,10360,25819,57106,81488,84275,121504	FOXE3,FOS,FOSB,GTF3C1,POLRMT,RMRP,H4C9,H4C1,H4C4,H4C6,H4C12,H4C3,H4C8,H4C2,H4C5,H4C13,NPM3,NOCT,NAT14,POLR2M,SLC25A33,H4-16
1_Member	GO Biological Processes	GO:0097659	nucleic acid-templated transcription	-5.36086	-3.14771	21/388	2301,2353,2354,2975,5442,6023,8294,8359,8360,8361,8362,8364,8365,8366,8367,8368,10360,25819,57106,84275,121504	FOXE3,FOS,FOSB,GTF3C1,POLRMT,RMRP,H4C9,H4C1,H4C4,H4C6,H4C12,H4C3,H4C8,H4C2,H4C5,H4C13,NPM3,NOCT,NAT14,SLC25A33,H4-16
1_Member	GO Biological Processes	GO:1903706	regulation of hemopoiesis	-5.10898	-2.89902	20/371	1021,2353,3304,3692,8294,8359,8360,8361,8362,8364,8365,8366,8367,8368,9636,64783,84959,121504,140685,149041	CDK6,FOS,HSPA1B,EIF6,H4C9,H4C1,H4C4,H4C6,H4C12,H4C3,H4C8,H4C2,H4C5,H4C13,ISG15,RBM15,UBASH3B,H4-16,ZBTB46,RC3H1
1_Member	GO Biological Processes	GO:0018130	heterocycle biosynthetic process	-5.10325	-2.89644	32/790	31,514,2301,2353,2354,2975,4831,5442,6023,7012,8294,8359,8360,8361,8362,8364,8365,8366,8367,8368,10360,10588,25819,27304,29920,57106,79877,81488,84275,121504,196883,441024	ACACA,ATP5F1E,FOXE3,FOS,FOSB,GTF3C1,NME2,POLRMT,RMRP,TERC,H4C9,H4C1,H4C4,H4C6,H4C12,H4C3,H4C8,H4C2,H4C5,H4C13,NPM3,MTHFS,NOCT,MOCS3,PYCR2,NAT14,DCAKD,POLR2M,SLC25A33,H4-16,ADCY4,MTHFD2L
1_Member	GO Biological Processes	GO:0006351	transcription, DNA-templated	-4.85829	-2.65462	20/386	2301,2353,2354,2975,5442,8294,8359,8360,8361,8362,8364,8365,8366,8367,8368,10360,25819,57106,84275,121504	FOXE3,FOS,FOSB,GTF3C1,POLRMT,H4C9,H4C1,H4C4,H4C6,H4C12,H4C3,H4C8,H4C2,H4C5,H4C13,NPM3,NOCT,NAT14,SLC25A33,H4-16
1_Member	GO Biological Processes	GO:0034654	nucleobase-containing compound biosynthetic process	-4.65568	-2.45821	29/718	31,514,2301,2353,2354,2975,4831,5442,6023,7012,8294,8359,8360,8361,8362,8364,8365,8366,8367,8368,10360,25819,57106,79877,81488,84275,121504,196883,441024	ACACA,ATP5F1E,FOXE3,FOS,FOSB,GTF3C1,NME2,POLRMT,RMRP,TERC,H4C9,H4C1,H4C4,H4C6,H4C12,H4C3,H4C8,H4C2,H4C5,H4C13,NPM3,NOCT,NAT14,DCAKD,POLR2M,SLC25A33,H4-16,ADCY4,MTHFD2L
1_Member	GO Biological Processes	GO:0019438	aromatic compound biosynthetic process	-4.21397	-2.0346	30/799	31,514,2301,2353,2354,2975,4831,5442,6023,7012,8294,8359,8360,8361,8362,8364,8365,8366,8367,8368,10360,10588,25819,57106,79877,81488,84275,121504,196883,441024	ACACA,ATP5F1E,FOXE3,FOS,FOSB,GTF3C1,NME2,POLRMT,RMRP,TERC,H4C9,H4C1,H4C4,H4C6,H4C12,H4C3,H4C8,H4C2,H4C5,H4C13,NPM3,MTHFS,NOCT,NAT14,DCAKD,POLR2M,SLC25A33,H4-16,ADCY4,MTHFD2L
2_Summary	Reactome Gene Sets	R-HSA-5689880	Ub-specific processing proteases	-16.7161	-14.378	29/220	3012,3013,3017,3018,4193,4194,6314,8329,8330,8331,8332,8334,8335,8336,8338,8340,8341,8342,8345,8348,8349,8969,8970,85235,85236,92815,128312,317772,440689,54891,84282,221937,637,817	H2AC8,H2AC7,H2BC5,H2BC3,MDM2,MDM4,ATXN7,H2AC13,H2AC15,H2AC14,H2AC16,H2AC6,H2AC4,H2AC17,H2AC20,H2BC13,H2BC15,H2BC14,H2BC9,H2BC17,H2BC21,H2AC11,H2BC11,H2AC12,H2BC12,H2AW,H2BU1,H2AC21,H2BC18,INO80D,RNF135,FOXK1,BID,CAMK2D
2_Member	Reactome Gene Sets	R-HSA-5689880	Ub-specific processing proteases	-16.7161	-14.378	29/220	3012,3013,3017,3018,4193,4194,6314,8329,8330,8331,8332,8334,8335,8336,8338,8340,8341,8342,8345,8348,8349,8969,8970,85235,85236,92815,128312,317772,440689	H2AC8,H2AC7,H2BC5,H2BC3,MDM2,MDM4,ATXN7,H2AC13,H2AC15,H2AC14,H2AC16,H2AC6,H2AC4,H2AC17,H2AC20,H2BC13,H2BC15,H2BC14,H2BC9,H2BC17,H2BC21,H2AC11,H2BC11,H2AC12,H2BC12,H2AW,H2BU1,H2AC21,H2BC18
2_Member	Reactome Gene Sets	R-HSA-5688426	Deubiquitination	-15.7413	-13.4117	32/298	3012,3013,3017,3018,4193,4194,6314,8329,8330,8331,8332,8334,8335,8336,8338,8340,8341,8342,8345,8348,8349,8969,8970,54891,84282,85235,85236,92815,128312,221937,317772,440689	H2AC8,H2AC7,H2BC5,H2BC3,MDM2,MDM4,ATXN7,H2AC13,H2AC15,H2AC14,H2AC16,H2AC6,H2AC4,H2AC17,H2AC20,H2BC13,H2BC15,H2BC14,H2BC9,H2BC17,H2BC21,H2AC11,H2BC11,INO80D,RNF135,H2AC12,H2BC12,H2AW,H2BU1,FOXK1,H2AC21,H2BC18
2_Member	Reactome Gene Sets	R-HSA-5689901	Metalloprotease DUBs	-15.1683	-12.8469	14/37	3012,3013,8329,8330,8331,8332,8334,8335,8336,8338,8969,85235,92815,317772	H2AC8,H2AC7,H2AC13,H2AC15,H2AC14,H2AC16,H2AC6,H2AC4,H2AC17,H2AC20,H2AC11,H2AC12,H2AW,H2AC21
2_Member	Reactome Gene Sets	R-HSA-5689603	UCH proteinases	-10.6636	-8.38882	16/102	3012,3013,8329,8330,8331,8332,8334,8335,8336,8338,8969,54891,85235,92815,221937,317772	H2AC8,H2AC7,H2AC13,H2AC15,H2AC14,H2AC16,H2AC6,H2AC4,H2AC17,H2AC20,H2AC11,INO80D,H2AC12,H2AW,FOXK1,H2AC21
2_Member	KEGG Pathway	hsa04217	Necroptosis	-7.76793	-5.52505	16/159	637,817,3012,3013,8329,8330,8331,8332,8334,8335,8336,8338,8969,85235,92815,317772	BID,CAMK2D,H2AC8,H2AC7,H2AC13,H2AC15,H2AC14,H2AC16,H2AC6,H2AC4,H2AC17,H2AC20,H2AC11,H2AC12,H2AW,H2AC21
3_Summary	Reactome Gene Sets	R-HSA-1266695	Interleukin-7 signaling	-12.3097	-10.0237	12/36	3667,8350,8351,8352,8353,8354,8355,8356,8357,8358,8968,653604,9759,64783,201161,4193,5600,7335,23236,7102,2353,3589,3592,5784,6657,9021,817,9636	IRS1,H3C1,H3C4,H3C3,H3C6,H3C11,H3C8,H3C12,H3C10,H3C2,H3C7,H3C13,HDAC4,RBM15,CENPV,MDM2,MAPK11,UBE2V1,PLCB1,TSPAN7,FOS,IL11,IL12A,PTPN14,SOX2,SOCS3,CAMK2D,ISG15
3_Member	Reactome Gene Sets	R-HSA-1266695	Interleukin-7 signaling	-12.3097	-10.0237	12/36	3667,8350,8351,8352,8353,8354,8355,8356,8357,8358,8968,653604	IRS1,H3C1,H3C4,H3C3,H3C6,H3C11,H3C8,H3C12,H3C10,H3C2,H3C7,H3C13
3_Member	WikiPathways	WP4553	FBXL10 enhancement of MAP/ERK signaling in diffuse large B-cell lymphoma	-10.5711	-8.29997	11/38	8350,8351,8352,8353,8354,8355,8356,8357,8358,8968,653604	H3C1,H3C4,H3C3,H3C6,H3C11,H3C8,H3C12,H3C10,H3C2,H3C7,H3C13
3_Member	WikiPathways	WP4320	Effect of progerin on genes involved in Hutchinson-Gilford progeria syndrome	-10.4339	-8.16641	11/39	8350,8351,8352,8353,8354,8355,8356,8357,8358,8968,653604	H3C1,H3C4,H3C3,H3C6,H3C11,H3C8,H3C12,H3C10,H3C2,H3C7,H3C13
3_Member	GO Biological Processes	GO:0040029	regulation of gene expression, epigenetic	-7.02304	-4.78695	13/115	8350,8351,8352,8353,8354,8355,8356,8357,8358,8968,9759,64783,201161	H3C1,H3C4,H3C3,H3C6,H3C11,H3C8,H3C12,H3C10,H3C2,H3C7,HDAC4,RBM15,CENPV
3_Member	KEGG Pathway	hsa05131	Shigellosis	-4.56763	-2.37323	15/247	4193,5600,7335,8350,8351,8352,8353,8354,8355,8356,8357,8358,8968,23236,653604	MDM2,MAPK11,UBE2V1,H3C1,H3C4,H3C3,H3C6,H3C11,H3C8,H3C12,H3C10,H3C2,H3C7,PLCB1,H3C13
3_Member	KEGG Pathway	hsa05202	Transcriptional misregulation in cancer	-4.52245	-2.33413	13/192	4193,7102,8350,8351,8352,8353,8354,8355,8356,8357,8358,8968,653604	MDM2,TSPAN7,H3C1,H3C4,H3C3,H3C6,H3C11,H3C8,H3C12,H3C10,H3C2,H3C7,H3C13
3_Member	Reactome Gene Sets	R-HSA-983231	Factors involved in megakaryocyte development and platelet production	-3.78758	-1.63955	11/168	8350,8351,8352,8353,8354,8355,8356,8357,8358,8968,653604	H3C1,H3C4,H3C3,H3C6,H3C11,H3C8,H3C12,H3C10,H3C2,H3C7,H3C13
3_Member	Reactome Gene Sets	R-HSA-449147	Signaling by Interleukins	-3.77953	-1.63568	20/462	2353,3589,3592,3667,5600,5784,6657,7335,8350,8351,8352,8353,8354,8355,8356,8357,8358,8968,9021,653604	FOS,IL11,IL12A,IRS1,MAPK11,PTPN14,SOX2,UBE2V1,H3C1,H3C4,H3C3,H3C6,H3C11,H3C8,H3C12,H3C10,H3C2,H3C7,SOCS3,H3C13
3_Member	Reactome Gene Sets	R-HSA-1280215	Cytokine Signaling in Immune system	-2.18668	-0.368911	22/715	817,2353,3589,3592,3667,5600,5784,6657,7335,8350,8351,8352,8353,8354,8355,8356,8357,8358,8968,9021,9636,653604	CAMK2D,FOS,IL11,IL12A,IRS1,MAPK11,PTPN14,SOX2,UBE2V1,H3C1,H3C4,H3C3,H3C6,H3C11,H3C8,H3C12,H3C10,H3C2,H3C7,SOCS3,ISG15,H3C13
4_Summary	Reactome Gene Sets	R-HSA-8866654	E3 ubiquitin ligases ubiquitinate target proteins	-7.22461	-4.98514	10/59	3017,3018,8340,8341,8342,8345,8348,8970,85236,220441,3008,4193,8351,64782,128312	H2BC5,H2BC3,H2BC13,H2BC15,H2BC14,H2BC9,H2BC17,H2BC11,H2BC12,RNF152,H1-4,MDM2,H3C4,AEN,H2BU1
4_Member	Reactome Gene Sets	R-HSA-8866654	E3 ubiquitin ligases ubiquitinate target proteins	-7.22461	-4.98514	10/59	3017,3018,8340,8341,8342,8345,8348,8970,85236,220441	H2BC5,H2BC3,H2BC13,H2BC15,H2BC14,H2BC9,H2BC17,H2BC11,H2BC12,RNF152
4_Member	Reactome Gene Sets	R-HSA-8852135	Protein ubiquitination	-5.99719	-3.77436	10/79	3017,3018,8340,8341,8342,8345,8348,8970,85236,220441	H2BC5,H2BC3,H2BC13,H2BC15,H2BC14,H2BC9,H2BC17,H2BC11,H2BC12,RNF152
4_Member	WikiPathways	WP4286	Genotoxicity pathway	-3.99578	-1.83662	7/63	3008,3018,4193,8341,8342,8351,64782	H1-4,H2BC3,MDM2,H2BC15,H2BC14,H3C4,AEN
4_Member	CORUM	CORUM:1227	H2AX complex II	-3.40917	-1.30552	3/9	3018,8342,128312	H2BC3,H2BC14,H2BU1
5_Summary	Reactome Gene Sets	R-HSA-140342	Apoptosis induced DNA fragmentation	-5.77732	-3.55774	5/13	1676,3006,3007,3008,3009,80311,54552,254225,2653,4193,4826,6314,9759,10626,51200,51588,53335,65990	DFFA,H1-2,H1-3,H1-4,H1-5,KLHL15,GNL3L,RNF169,GCSH,MDM2,NNAT,ATXN7,HDAC4,TRIM16,CPA4,PIAS4,BCL11A,ANTKMT
5_Member	Reactome Gene Sets	R-HSA-140342	Apoptosis induced DNA fragmentation	-5.77732	-3.55774	5/13	1676,3006,3007,3008,3009	DFFA,H1-2,H1-3,H1-4,H1-5
5_Member	GO Biological Processes	GO:0098532	histone H3-K27 trimethylation	-4.0157	-1.85086	3/6	3006,3007,3008	H1-2,H1-3,H1-4
5_Member	Reactome Gene Sets	R-HSA-2559584	Formation of Senescence-Associated Heterochromatin Foci (SAHF)	-3.87944	-1.72865	4/16	3006,3007,3008,3009	H1-2,H1-3,H1-4,H1-5
5_Member	GO Biological Processes	GO:0016584	nucleosome positioning	-3.76884	-1.63167	4/17	3006,3007,3008,3009	H1-2,H1-3,H1-4,H1-5
5_Member	GO Biological Processes	GO:0070734	histone H3-K27 methylation	-3.40917	-1.30552	3/9	3006,3007,3008	H1-2,H1-3,H1-4
5_Member	GO Biological Processes	GO:0045910	negative regulation of DNA recombination	-2.99614	-0.956948	5/45	3006,3007,3008,3009,80311	H1-2,H1-3,H1-4,H1-5,KLHL15
5_Member	GO Biological Processes	GO:0051053	negative regulation of DNA metabolic process	-2.88456	-0.870317	8/123	1676,3006,3007,3008,3009,54552,80311,254225	DFFA,H1-2,H1-3,H1-4,H1-5,GNL3L,KLHL15,RNF169
5_Member	GO Biological Processes	GO:0018205	peptidyl-lysine modification	-2.78736	-0.796698	13/290	2653,3006,3007,3008,4193,4826,6314,9759,10626,51200,51588,53335,65990	GCSH,H1-2,H1-3,H1-4,MDM2,NNAT,ATXN7,HDAC4,TRIM16,CPA4,PIAS4,BCL11A,ANTKMT
5_Member	Reactome Gene Sets	R-HSA-75153	Apoptotic execution phase	-2.71089	-0.738782	5/52	1676,3006,3007,3008,3009	DFFA,H1-2,H1-3,H1-4,H1-5
5_Member	GO Biological Processes	GO:0018023	peptidyl-lysine trimethylation	-2.28079	-0.437168	4/41	3006,3007,3008,65990	H1-2,H1-3,H1-4,ANTKMT
5_Member	GO Biological Processes	GO:0080182	histone H3-K4 trimethylation	-2.21783	-0.394891	3/22	3006,3007,3008	H1-2,H1-3,H1-4
5_Member	GO Biological Processes	GO:0030261	chromosome condensation	-2.20657	-0.38751	4/43	3006,3007,3008,3009	H1-2,H1-3,H1-4,H1-5
6_Summary	Reactome Gene Sets	R-HSA-5628897	TP53 Regulates Metabolic Genes	-4.72733	-2.52677	9/87	2539,2936,9997,23112,26523,27161,51241,116228,285521,637,1820,2353,4193,4194,5600,91875,117584,84275,514,656,2260,4217,7388,123096,196883,284184	G6PD,GSR,SCO2,TNRC6B,AGO1,AGO2,COX16,COX20,COX18,BID,ARID3A,FOS,MDM2,MDM4,MAPK11,TTC5,RFFL,SLC25A33,ATP5F1E,BMP8B,FGFR1,MAP3K5,UQCRH,SLC25A29,ADCY4,NDUFAF8
6_Member	Reactome Gene Sets	R-HSA-5628897	TP53 Regulates Metabolic Genes	-4.72733	-2.52677	9/87	2539,2936,9997,23112,26523,27161,51241,116228,285521	G6PD,GSR,SCO2,TNRC6B,AGO1,AGO2,COX16,COX20,COX18
6_Member	Reactome Gene Sets	R-HSA-3700989	Transcriptional Regulation by TP53	-3.66383	-1.52934	17/365	637,1820,2353,2539,2936,4193,4194,5600,9997,23112,26523,27161,51241,91875,116228,117584,285521	BID,ARID3A,FOS,G6PD,GSR,MDM2,MDM4,MAPK11,SCO2,TNRC6B,AGO1,AGO2,COX16,TTC5,COX20,RFFL,COX18
6_Member	GO Biological Processes	GO:0017004	cytochrome complex assembly	-3.45187	-1.33563	5/36	9997,51241,84275,116228,285521	SCO2,COX16,SLC25A33,COX20,COX18
6_Member	GO Biological Processes	GO:0033617	mitochondrial cytochrome c oxidase assembly	-3.31072	-1.2241	4/22	9997,51241,116228,285521	SCO2,COX16,COX20,COX18
6_Member	KEGG Pathway	hsa04714	Thermogenesis	-3.14126	-1.07333	12/232	514,656,2260,4217,5600,7388,51241,116228,123096,196883,284184,285521	ATP5F1E,BMP8B,FGFR1,MAP3K5,MAPK11,UQCRH,COX16,COX20,SLC25A29,ADCY4,NDUFAF8,COX18
6_Member	GO Biological Processes	GO:0008535	respiratory chain complex IV assembly	-3.02384	-0.980348	4/26	9997,51241,116228,285521	SCO2,COX16,COX20,COX18
6_Member	WikiPathways	WP4922	Mitochondrial complex IV assembly	-2.48695	-0.58274	4/36	9997,51241,116228,285521	SCO2,COX16,COX20,COX18
6_Member	GO Biological Processes	GO:0033108	mitochondrial respiratory chain complex assembly	-2.24855	-0.415086	6/94	9997,51241,84275,116228,284184,285521	SCO2,COX16,SLC25A33,COX20,NDUFAF8,COX18
7_Summary	GO Biological Processes	GO:0060411	cardiac septum morphogenesis	-4.53453	-2.34319	8/71	2535,4193,4488,6608,6664,6909,7474,64783,4194,6331,3714,357,1826,2201,2301,4915,24147,613,3777,4771,6657,9497,9997,10763,23657,340784,60529	FZD2,MDM2,MSX2,SMO,SOX11,TBX2,WNT5A,RBM15,MDM4,SCN5A,JAG2,SHROOM2,DSCAM,FBN2,FOXE3,NTRK2,FJX1,BCR,KCNK3,NF2,SOX2,SLC4A7,SCO2,NES,SLC7A11,HMX3,ALX4
7_Member	GO Biological Processes	GO:0060411	cardiac septum morphogenesis	-4.53453	-2.34319	8/71	2535,4193,4488,6608,6664,6909,7474,64783	FZD2,MDM2,MSX2,SMO,SOX11,TBX2,WNT5A,RBM15
7_Member	GO Biological Processes	GO:0003279	cardiac septum development	-4.04552	-1.87493	9/106	2535,4193,4194,4488,6608,6664,6909,7474,64783	FZD2,MDM2,MDM4,MSX2,SMO,SOX11,TBX2,WNT5A,RBM15
7_Member	GO Biological Processes	GO:0003205	cardiac chamber development	-3.18867	-1.1115	10/167	2535,4193,4194,4488,6331,6608,6664,6909,7474,64783	FZD2,MDM2,MDM4,MSX2,SCN5A,SMO,SOX11,TBX2,WNT5A,RBM15
7_Member	GO Biological Processes	GO:0062009	secondary palate development	-3.02384	-0.980348	4/26	2535,3714,6664,7474	FZD2,JAG2,SOX11,WNT5A
7_Member	GO Biological Processes	GO:0048592	eye morphogenesis	-2.92991	-0.903376	9/150	357,1826,2201,2301,4915,6664,6909,7474,24147	SHROOM2,DSCAM,FBN2,FOXE3,NTRK2,SOX11,TBX2,WNT5A,FJX1
7_Member	GO Biological Processes	GO:0048593	camera-type eye morphogenesis	-2.90735	-0.889042	8/122	357,1826,2301,4915,6664,6909,7474,24147	SHROOM2,DSCAM,FOXE3,NTRK2,SOX11,TBX2,WNT5A,FJX1
7_Member	GO Biological Processes	GO:0007423	sensory organ development	-2.82488	-0.822583	20/551	357,613,1826,2201,2301,2535,3714,3777,4771,4915,6657,6664,6909,7474,9497,9997,10763,23657,24147,340784	SHROOM2,BCR,DSCAM,FBN2,FOXE3,FZD2,JAG2,KCNK3,NF2,NTRK2,SOX2,SOX11,TBX2,WNT5A,SLC4A7,SCO2,NES,SLC7A11,FJX1,HMX3
7_Member	GO Biological Processes	GO:0003206	cardiac chamber morphogenesis	-2.81765	-0.819268	8/126	2535,4193,4488,6608,6664,6909,7474,64783	FZD2,MDM2,MSX2,SMO,SOX11,TBX2,WNT5A,RBM15
7_Member	GO Biological Processes	GO:0003281	ventricular septum development	-2.79803	-0.803526	6/73	2535,4193,4194,6664,7474,64783	FZD2,MDM2,MDM4,SOX11,WNT5A,RBM15
7_Member	GO Biological Processes	GO:0090596	sensory organ morphogenesis	-2.70538	-0.737095	12/261	357,613,1826,2201,2301,2535,4915,6664,6909,7474,24147,340784	SHROOM2,BCR,DSCAM,FBN2,FOXE3,FZD2,NTRK2,SOX11,TBX2,WNT5A,FJX1,HMX3
7_Member	GO Biological Processes	GO:0002088	lens development in camera-type eye	-2.65048	-0.692961	6/78	357,2301,4771,6664,7474,23657	SHROOM2,FOXE3,NF2,SOX11,WNT5A,SLC7A11
7_Member	GO Biological Processes	GO:0048048	embryonic eye morphogenesis	-2.53225	-0.60717	4/35	2201,6664,6909,7474	FBN2,SOX11,TBX2,WNT5A
7_Member	GO Biological Processes	GO:0031076	embryonic camera-type eye development	-2.4431	-0.546663	4/37	6664,6909,7474,10763	SOX11,TBX2,WNT5A,NES
7_Member	GO Biological Processes	GO:0001654	eye development	-2.35409	-0.481626	14/364	357,1826,2201,2301,4771,4915,6657,6664,6909,7474,9997,10763,23657,24147	SHROOM2,DSCAM,FBN2,FOXE3,NF2,NTRK2,SOX2,SOX11,TBX2,WNT5A,SCO2,NES,SLC7A11,FJX1
7_Member	GO Biological Processes	GO:0043583	ear development	-2.34992	-0.481608	10/217	357,613,2535,3714,3777,6657,6909,7474,9497,340784	SHROOM2,BCR,FZD2,JAG2,KCNK3,SOX2,TBX2,WNT5A,SLC4A7,HMX3
7_Member	GO Biological Processes	GO:0060021	roof of mouth development	-2.31691	-0.464379	6/91	2535,3714,6664,6909,7474,60529	FZD2,JAG2,SOX11,TBX2,WNT5A,ALX4
7_Member	GO Biological Processes	GO:0150063	visual system development	-2.31302	-0.461882	14/368	357,1826,2201,2301,4771,4915,6657,6664,6909,7474,9997,10763,23657,24147	SHROOM2,DSCAM,FBN2,FOXE3,NF2,NTRK2,SOX2,SOX11,TBX2,WNT5A,SCO2,NES,SLC7A11,FJX1
7_Member	GO Biological Processes	GO:0048880	sensory system development	-2.25278	-0.417982	14/374	357,1826,2201,2301,4771,4915,6657,6664,6909,7474,9997,10763,23657,24147	SHROOM2,DSCAM,FBN2,FOXE3,NF2,NTRK2,SOX2,SOX11,TBX2,WNT5A,SCO2,NES,SLC7A11,FJX1
7_Member	GO Biological Processes	GO:0060412	ventricular septum morphogenesis	-2.24315	-0.412357	4/42	2535,6664,7474,64783	FZD2,SOX11,WNT5A,RBM15
7_Member	GO Biological Processes	GO:0048839	inner ear development	-2.24185	-0.412357	9/190	613,2535,3714,3777,6657,6909,7474,9497,340784	BCR,FZD2,JAG2,KCNK3,SOX2,TBX2,WNT5A,SLC4A7,HMX3
7_Member	GO Biological Processes	GO:0003231	cardiac ventricle development	-2.21166	-0.391316	7/126	2535,4193,4194,6331,6664,7474,64783	FZD2,MDM2,MDM4,SCN5A,SOX11,WNT5A,RBM15
7_Member	GO Biological Processes	GO:0090103	cochlea morphogenesis	-2.11013	-0.314894	3/24	2535,6909,7474	FZD2,TBX2,WNT5A
7_Member	GO Biological Processes	GO:0043010	camera-type eye development	-2.03111	-0.256138	12/318	357,1826,2201,2301,4771,4915,6664,6909,7474,10763,23657,24147	SHROOM2,DSCAM,FBN2,FOXE3,NF2,NTRK2,SOX11,TBX2,WNT5A,NES,SLC7A11,FJX1
7_Member	GO Biological Processes	GO:0048596	embryonic camera-type eye morphogenesis	-2.01234	-0.247703	3/26	6664,6909,7474	SOX11,TBX2,WNT5A
7_Member	GO Biological Processes	GO:0090102	cochlea development	-2.00668	-0.247703	4/49	2535,3777,6909,7474	FZD2,KCNK3,TBX2,WNT5A
7_Member	GO Biological Processes	GO:0003151	outflow tract morphogenesis	-2.00401	-0.247106	5/76	2535,4488,6664,6909,7474	FZD2,MSX2,SOX11,TBX2,WNT5A
8_Summary	GO Biological Processes	GO:0006518	peptide metabolic process	-4.34345	-2.15813	22/489	1359,1968,2539,2729,2936,3692,4012,5126,5936,6146,6170,6171,6218,6228,23474,23657,27161,29904,51022,64146,64951,80755,72,3007,8342,10642,51631,31,4597,7357,8869,10588,441024,1454,23246,79897,118460,1081,2653,4953,23464,29920,152926,256987,1839,2353,3592,5600,9636	CPA3,EIF2S3,G6PD,GCLC,GSR,EIF6,LNPEP,PCSK2,RBM4,RPL22,RPL39,RPL41,RPS17,RPS23,ETHE1,SLC7A11,AGO2,EEF2K,GLRX2,PDF,MRPS24,AARSD1,ACTG2,H1-3,H2BC14,IGF2BP1,LUC7L2,ACACA,MVD,UGCG,ST3GAL5,MTHFS,MTHFD2L,CSNK1E,BOP1,RPP21,EXOSC6,CGA,GCSH,ODC1,GCAT,PYCR2,PPM1K,SERINC5,HBEGF,FOS,IL12A,MAPK11,ISG15
8_Member	GO Biological Processes	GO:0006518	peptide metabolic process	-4.34345	-2.15813	22/489	1359,1968,2539,2729,2936,3692,4012,5126,5936,6146,6170,6171,6218,6228,23474,23657,27161,29904,51022,64146,64951,80755	CPA3,EIF2S3,G6PD,GCLC,GSR,EIF6,LNPEP,PCSK2,RBM4,RPL22,RPL39,RPL41,RPS17,RPS23,ETHE1,SLC7A11,AGO2,EEF2K,GLRX2,PDF,MRPS24,AARSD1
8_Member	CORUM	CORUM:3055	Nop56p-associated pre-rRNA complex	-4.10988	-1.93346	9/104	72,3007,6146,6170,6218,6228,8342,10642,51631	ACTG2,H1-3,RPL22,RPL39,RPS17,RPS23,H2BC14,IGF2BP1,LUC7L2
8_Member	GO Biological Processes	GO:0043603	cellular amide metabolic process	-3.92975	-1.7734	28/750	31,1359,1968,2539,2729,2936,3692,4012,4597,5126,5936,6146,6170,6171,6218,6228,7357,8869,10588,23474,23657,27161,29904,51022,64146,64951,80755,441024	ACACA,CPA3,EIF2S3,G6PD,GCLC,GSR,EIF6,LNPEP,MVD,PCSK2,RBM4,RPL22,RPL39,RPL41,RPS17,RPS23,UGCG,ST3GAL5,MTHFS,ETHE1,SLC7A11,AGO2,EEF2K,GLRX2,PDF,MRPS24,AARSD1,MTHFD2L
8_Member	GO Biological Processes	GO:0002181	cytoplasmic translation	-2.49098	-0.58274	7/112	1968,5936,6146,6170,6171,6218,6228	EIF2S3,RBM4,RPL22,RPL39,RPL41,RPS17,RPS23
8_Member	GO Biological Processes	GO:0043604	amide biosynthetic process	-2.43182	-0.53692	17/474	31,1968,2729,3692,5936,6146,6170,6171,6218,6228,7357,8869,27161,29904,64146,64951,80755	ACACA,EIF2S3,GCLC,EIF6,RBM4,RPL22,RPL39,RPL41,RPS17,RPS23,UGCG,ST3GAL5,AGO2,EEF2K,PDF,MRPS24,AARSD1
8_Member	GO Biological Processes	GO:0043043	peptide biosynthetic process	-2.40649	-0.514908	14/359	1968,2729,3692,5936,6146,6170,6171,6218,6228,27161,29904,64146,64951,80755	EIF2S3,GCLC,EIF6,RBM4,RPL22,RPL39,RPL41,RPS17,RPS23,AGO2,EEF2K,PDF,MRPS24,AARSD1
8_Member	GO Biological Processes	GO:0006413	translational initiation	-2.34542	-0.481608	5/63	1968,3692,5936,6218,27161	EIF2S3,EIF6,RBM4,RPS17,AGO2
8_Member	Reactome Gene Sets	R-HSA-6791226	Major pathway of rRNA processing in the nucleolus and cytosol	-2.33138	-0.471837	9/184	1454,6146,6170,6171,6218,6228,23246,79897,118460	CSNK1E,RPL22,RPL39,RPL41,RPS17,RPS23,BOP1,RPP21,EXOSC6
8_Member	GO Biological Processes	GO:0006412	translation	-2.28711	-0.438737	13/332	1968,3692,5936,6146,6170,6171,6218,6228,27161,29904,64146,64951,80755	EIF2S3,EIF6,RBM4,RPL22,RPL39,RPL41,RPS17,RPS23,AGO2,EEF2K,PDF,MRPS24,AARSD1
8_Member	Reactome Gene Sets	R-HSA-71291	Metabolism of amino acids and derivatives	-2.25278	-0.417982	14/374	1081,2653,2936,4953,6146,6170,6171,6218,6228,23464,23474,29920,152926,256987	CGA,GCSH,GSR,ODC1,RPL22,RPL39,RPL41,RPS17,RPS23,GCAT,ETHE1,PYCR2,PPM1K,SERINC5
8_Member	Reactome Gene Sets	R-HSA-8868773	rRNA processing in the nucleus and cytosol	-2.1844	-0.367919	9/194	1454,6146,6170,6171,6218,6228,23246,79897,118460	CSNK1E,RPL22,RPL39,RPL41,RPS17,RPS23,BOP1,RPP21,EXOSC6
8_Member	KEGG Pathway	hsa05171	Coronavirus disease - COVID-19	-2.15105	-0.34719	10/232	1839,2353,3592,5600,6146,6170,6171,6218,6228,9636	HBEGF,FOS,IL12A,MAPK11,RPL22,RPL39,RPL41,RPS17,RPS23,ISG15
8_Member	Reactome Gene Sets	R-HSA-9633012	Response of EIF2AK4 (GCN2) to amino acid deficiency	-2.09958	-0.306782	6/101	1968,6146,6170,6171,6218,6228	EIF2S3,RPL22,RPL39,RPL41,RPS17,RPS23
8_Member	Reactome Gene Sets	R-HSA-72312	rRNA processing	-2.04813	-0.270818	9/204	1454,6146,6170,6171,6218,6228,23246,79897,118460	CSNK1E,RPL22,RPL39,RPL41,RPS17,RPS23,BOP1,RPP21,EXOSC6
9_Summary	KEGG Pathway	hsa05200	Pathways in cancer	-4.2621	-2.07976	23/531	613,637,817,1021,1630,2149,2260,2353,2535,2790,3592,3714,4193,5605,6608,7012,7474,8030,8326,8643,23236,112398,196883,2890,463,5600,6657,130399,3777,2201,6664,9636,1839,1454,85409	BCR,BID,CAMK2D,CDK6,DCC,F2R,FGFR1,FOS,FZD2,GNG10,IL12A,JAG2,MDM2,MAP2K2,SMO,TERC,WNT5A,CCDC6,FZD9,PTCH2,PLCB1,EGLN2,ADCY4,GRIA1,ZFHX3,MAPK11,SOX2,ACVR1C,KCNK3,FBN2,SOX11,ISG15,HBEGF,CSNK1E,NKD2
9_Member	KEGG Pathway	hsa05200	Pathways in cancer	-4.2621	-2.07976	23/531	613,637,817,1021,1630,2149,2260,2353,2535,2790,3592,3714,4193,5605,6608,7012,7474,8030,8326,8643,23236,112398,196883	BCR,BID,CAMK2D,CDK6,DCC,F2R,FGFR1,FOS,FZD2,GNG10,IL12A,JAG2,MDM2,MAP2K2,SMO,TERC,WNT5A,CCDC6,FZD9,PTCH2,PLCB1,EGLN2,ADCY4
9_Member	GO Biological Processes	GO:0099566	regulation of postsynaptic cytosolic calcium ion concentration	-3.25982	-1.17559	3/10	2890,7474,8326	GRIA1,WNT5A,FZD9
9_Member	KEGG Pathway	hsa04550	Signaling pathways regulating pluripotency of stem cells	-3.07655	-1.02433	9/143	463,2260,2535,5600,5605,6657,7474,8326,130399	ZFHX3,FGFR1,FZD2,MAPK11,MAP2K2,SOX2,WNT5A,FZD9,ACVR1C
9_Member	KEGG Pathway	hsa04934	Cushing syndrome	-2.8307	-0.824459	9/155	817,1021,2535,3777,5605,7474,8326,23236,196883	CAMK2D,CDK6,FZD2,KCNK3,MAP2K2,WNT5A,FZD9,PLCB1,ADCY4
9_Member	GO Biological Processes	GO:0045778	positive regulation of ossification	-2.74872	-0.763764	5/51	2201,6664,7474,8326,9636	FBN2,SOX11,WNT5A,FZD9,ISG15
9_Member	KEGG Pathway	hsa04916	Melanogenesis	-2.74499	-0.761915	7/101	817,2535,5605,7474,8326,23236,196883	CAMK2D,FZD2,MAP2K2,WNT5A,FZD9,PLCB1,ADCY4
9_Member	KEGG Pathway	hsa05205	Proteoglycans in cancer	-2.5243	-0.603484	10/205	817,1839,2260,2535,4193,5600,5605,6608,7474,8326	CAMK2D,HBEGF,FGFR1,FZD2,MDM2,MAPK11,MAP2K2,SMO,WNT5A,FZD9
9_Member	KEGG Pathway	hsa05224	Breast cancer	-2.4022	-0.514908	8/147	1021,2260,2353,2535,3714,5605,7474,8326	CDK6,FGFR1,FOS,FZD2,JAG2,MAP2K2,WNT5A,FZD9
9_Member	WikiPathways	WP428	Wnt signaling	-2.36585	-0.487511	7/118	817,1454,2535,7474,8326,23236,85409	CAMK2D,CSNK1E,FZD2,WNT5A,FZD9,PLCB1,NKD2
9_Member	WikiPathways	WP3931	Embryonic stem cell pluripotency pathways	-2.34582	-0.481608	7/119	2260,2353,2535,4193,5605,7474,8326	FGFR1,FOS,FZD2,MDM2,MAP2K2,WNT5A,FZD9
9_Member	KEGG Pathway	hsa05217	Basal cell carcinoma	-2.34542	-0.481608	5/63	2535,6608,7474,8326,8643	FZD2,SMO,WNT5A,FZD9,PTCH2
9_Member	WikiPathways	WP4787	Osteoblast differentiation and related diseases	-2.32601	-0.467875	7/120	2260,2535,3714,5600,6608,7474,8326	FGFR1,FZD2,JAG2,MAPK11,SMO,WNT5A,FZD9
9_Member	WikiPathways	WP4262	Breast cancer pathway	-2.23187	-0.404714	8/157	1021,2260,2353,2535,3714,5605,7474,8326	CDK6,FGFR1,FOS,FZD2,JAG2,MAP2K2,WNT5A,FZD9
9_Member	Reactome Gene Sets	R-HSA-373080	Class B/2 (Secretin family receptors)	-2.2264	-0.400849	6/95	2535,2790,6608,7474,8326,8643	FZD2,GNG10,SMO,WNT5A,FZD9,PTCH2
9_Member	WikiPathways	WP4258	lncRNA in canonical Wnt signaling and colorectal cancer	-2.03985	-0.263712	6/104	1021,1454,2535,7474,8326,85409	CDK6,CSNK1E,FZD2,WNT5A,FZD9,NKD2
10_Summary	KEGG Pathway	hsa04390	Hippo signaling pathway	-4.04853	-1.87503	11/157	656,1454,2535,4771,6657,7474,8200,8326,8994,25937,85409,2194,4488,5600,6608,57665,51025,267,3090,7162,30851	BMP8B,CSNK1E,FZD2,NF2,SOX2,WNT5A,GDF5,FZD9,LIMD1,WWTR1,NKD2,FASN,MSX2,MAPK11,SMO,RDH14,PAM16,AMFR,HIC1,TPBG,TAX1BP3
10_Member	KEGG Pathway	hsa04390	Hippo signaling pathway	-4.04853	-1.87503	11/157	656,1454,2535,4771,6657,7474,8200,8326,8994,25937,85409	BMP8B,CSNK1E,FZD2,NF2,SOX2,WNT5A,GDF5,FZD9,LIMD1,WWTR1,NKD2
10_Member	GO Biological Processes	GO:0001649	osteoblast differentiation	-2.68994	-0.723544	8/132	2194,4488,5600,6608,6657,8994,25937,57665	FASN,MSX2,MAPK11,SMO,SOX2,LIMD1,WWTR1,RDH14
10_Member	GO Biological Processes	GO:0001503	ossification	-2.57134	-0.637959	12/271	656,2194,4488,5600,6608,6657,8200,8326,8994,25937,51025,57665	BMP8B,FASN,MSX2,MAPK11,SMO,SOX2,GDF5,FZD9,LIMD1,WWTR1,PAM16,RDH14
10_Member	GO Biological Processes	GO:0030178	negative regulation of Wnt signaling pathway	-2.49031	-0.58274	9/174	267,3090,6657,7162,7474,8994,25937,30851,85409	AMFR,HIC1,SOX2,TPBG,WNT5A,LIMD1,WWTR1,TAX1BP3,NKD2
11_Summary	Reactome Gene Sets	R-HSA-4086398	Ca2+ pathway	-4.04054	-1.87283	7/62	2535,2790,7474,23112,23236,26523,27161,6023,10658,1021,25819,91875,149041,399664,10642,5605,8994,817,1454,2729,3304,3667,4193,26086,85409,112398,220441,440730,115572,6657,708,5936,64783,3692,4915,2194	FZD2,GNG10,WNT5A,TNRC6B,PLCB1,AGO1,AGO2,RMRP,CELF1,CDK6,NOCT,TTC5,RC3H1,MEX3D,IGF2BP1,MAP2K2,LIMD1,CAMK2D,CSNK1E,GCLC,HSPA1B,IRS1,MDM2,GPSM1,NKD2,EGLN2,RNF152,TRIM67,TENT5B,SOX2,C1QBP,RBM4,RBM15,EIF6,NTRK2,FASN
11_Member	Reactome Gene Sets	R-HSA-4086398	Ca2+ pathway	-4.04054	-1.87283	7/62	2535,2790,7474,23112,23236,26523,27161	FZD2,GNG10,WNT5A,TNRC6B,PLCB1,AGO1,AGO2
11_Member	GO Biological Processes	GO:0016246	RNA interference	-3.87944	-1.72865	4/16	6023,10658,26523,27161	RMRP,CELF1,AGO1,AGO2
11_Member	Reactome Gene Sets	R-HSA-426496	Post-transcriptional silencing by small RNAs	-3.77824	-1.63568	3/7	23112,26523,27161	TNRC6B,AGO1,AGO2
11_Member	Reactome Gene Sets	R-HSA-8934593	Regulation of RUNX1 Expression and Activity	-3.76884	-1.63167	4/17	1021,23112,26523,27161	CDK6,TNRC6B,AGO1,AGO2
11_Member	Reactome Gene Sets	R-HSA-8948700	Competing endogenous RNAs (ceRNAs) regulate PTEN translation	-3.57969	-1.45832	3/8	23112,26523,27161	TNRC6B,AGO1,AGO2
11_Member	Reactome Gene Sets	R-HSA-8943723	Regulation of PTEN mRNA translation	-3.40917	-1.30552	3/9	23112,26523,27161	TNRC6B,AGO1,AGO2
11_Member	GO Biological Processes	GO:0061014	positive regulation of mRNA catabolic process	-3.21661	-1.1371	7/84	10658,23112,25819,27161,91875,149041,399664	CELF1,TNRC6B,NOCT,AGO2,TTC5,RC3H1,MEX3D
11_Member	GO Biological Processes	GO:1900151	regulation of nuclear-transcribed mRNA catabolic process, deadenylation-dependent decay	-3.02384	-0.980348	4/26	10642,23112,27161,149041	IGF2BP1,TNRC6B,AGO2,RC3H1
11_Member	GO Biological Processes	GO:2000637	positive regulation of gene silencing by miRNA	-2.78414	-0.795388	4/30	5605,8994,23112,27161	MAP2K2,LIMD1,TNRC6B,AGO2
11_Member	GO Biological Processes	GO:0060148	positive regulation of posttranscriptional gene silencing	-2.73	-0.752535	4/31	5605,8994,23112,27161	MAP2K2,LIMD1,TNRC6B,AGO2
11_Member	GO Biological Processes	GO:0060147	regulation of posttranscriptional gene silencing	-2.71089	-0.738782	5/52	5605,6023,8994,23112,27161	MAP2K2,RMRP,LIMD1,TNRC6B,AGO2
11_Member	GO Biological Processes	GO:0060966	regulation of gene silencing by RNA	-2.67392	-0.711185	5/53	5605,6023,8994,23112,27161	MAP2K2,RMRP,LIMD1,TNRC6B,AGO2
11_Member	Reactome Gene Sets	R-HSA-9022692	Regulation of MECP2 expression and activity	-2.62761	-0.673643	4/33	817,23112,26523,27161	CAMK2D,TNRC6B,AGO1,AGO2
11_Member	GO Biological Processes	GO:0009896	positive regulation of catabolic process	-2.53265	-0.60717	18/503	1454,2729,3304,3667,4193,7474,10658,23112,25819,26086,27161,85409,91875,112398,149041,220441,399664,440730	CSNK1E,GCLC,HSPA1B,IRS1,MDM2,WNT5A,CELF1,TNRC6B,NOCT,GPSM1,AGO2,NKD2,TTC5,EGLN2,RC3H1,RNF152,MEX3D,TRIM67
11_Member	GO Biological Processes	GO:0061013	regulation of mRNA catabolic process	-2.52366	-0.603484	9/172	10642,10658,23112,25819,27161,91875,115572,149041,399664	IGF2BP1,CELF1,TNRC6B,NOCT,AGO2,TTC5,TENT5B,RC3H1,MEX3D
11_Member	GO Biological Processes	GO:1903313	positive regulation of mRNA metabolic process	-2.4483	-0.547218	7/114	10658,23112,25819,27161,91875,149041,399664	CELF1,TNRC6B,NOCT,AGO2,TTC5,RC3H1,MEX3D
11_Member	GO Biological Processes	GO:0031331	positive regulation of cellular catabolic process	-2.38654	-0.504807	16/439	1454,2729,3304,3667,4193,10658,23112,25819,26086,27161,85409,91875,149041,220441,399664,440730	CSNK1E,GCLC,HSPA1B,IRS1,MDM2,CELF1,TNRC6B,NOCT,GPSM1,AGO2,NKD2,TTC5,RC3H1,RNF152,MEX3D,TRIM67
11_Member	Reactome Gene Sets	R-HSA-8986944	Transcriptional Regulation by MECP2	-2.37529	-0.495473	5/62	817,6657,23112,26523,27161	CAMK2D,SOX2,TNRC6B,AGO1,AGO2
11_Member	GO Biological Processes	GO:1903311	regulation of mRNA metabolic process	-2.30145	-0.451698	12/293	708,5936,10642,10658,23112,25819,27161,64783,91875,115572,149041,399664	C1QBP,RBM4,IGF2BP1,CELF1,TNRC6B,NOCT,AGO2,RBM15,TTC5,TENT5B,RC3H1,MEX3D
11_Member	GO Biological Processes	GO:0043488	regulation of mRNA stability	-2.28134	-0.437168	8/154	10642,10658,23112,25819,27161,115572,149041,399664	IGF2BP1,CELF1,TNRC6B,NOCT,AGO2,TENT5B,RC3H1,MEX3D
11_Member	GO Biological Processes	GO:0034249	negative regulation of cellular amide metabolic process	-2.15982	-0.350958	11/268	3692,4915,5936,10642,10658,23112,25819,26523,27161,149041,399664	EIF6,NTRK2,RBM4,IGF2BP1,CELF1,TNRC6B,NOCT,AGO1,AGO2,RC3H1,MEX3D
11_Member	GO Biological Processes	GO:0043487	regulation of RNA stability	-2.09112	-0.29953	8/166	10642,10658,23112,25819,27161,115572,149041,399664	IGF2BP1,CELF1,TNRC6B,NOCT,AGO2,TENT5B,RC3H1,MEX3D
11_Member	Reactome Gene Sets	R-HSA-9024446	NR1H2 and NR1H3-mediated signaling	-2.06985	-0.283285	4/47	2194,23112,26523,27161	FASN,TNRC6B,AGO1,AGO2
11_Member	GO Biological Processes	GO:0017148	negative regulation of translation	-2.05276	-0.273105	10/240	3692,5936,10642,10658,23112,25819,26523,27161,149041,399664	EIF6,RBM4,IGF2BP1,CELF1,TNRC6B,NOCT,AGO1,AGO2,RC3H1,MEX3D
11_Member	GO Biological Processes	GO:0060964	regulation of gene silencing by miRNA	-2.00668	-0.247703	4/49	5605,8994,23112,27161	MAP2K2,LIMD1,TNRC6B,AGO2
12_Summary	Reactome Gene Sets	R-HSA-112316	Neuronal System	-3.99743	-1.83662	19/410	320,321,610,817,2790,2890,3777,3781,4193,5613,7102,23236,26045,26251,55327,55799,57596,114798,196883	APBA1,APBA2,HCN2,CAMK2D,GNG10,GRIA1,KCNK3,KCNN2,MDM2,PRKX,TSPAN7,PLCB1,LRRTM2,KCNG2,LIN7C,CACNA2D3,BEGAIN,SLITRK1,ADCY4
12_Member	Reactome Gene Sets	R-HSA-112316	Neuronal System	-3.99743	-1.83662	19/410	320,321,610,817,2790,2890,3777,3781,4193,5613,7102,23236,26045,26251,55327,55799,57596,114798,196883	APBA1,APBA2,HCN2,CAMK2D,GNG10,GRIA1,KCNK3,KCNN2,MDM2,PRKX,TSPAN7,PLCB1,LRRTM2,KCNG2,LIN7C,CACNA2D3,BEGAIN,SLITRK1,ADCY4
12_Member	Reactome Gene Sets	R-HSA-399719	Trafficking of AMPA receptors	-2.73	-0.752535	4/31	817,2890,4193,7102	CAMK2D,GRIA1,MDM2,TSPAN7
12_Member	Reactome Gene Sets	R-HSA-399721	Glutamate binding, activation of AMPA receptors and synaptic plasticity	-2.73	-0.752535	4/31	817,2890,4193,7102	CAMK2D,GRIA1,MDM2,TSPAN7
12_Member	Reactome Gene Sets	R-HSA-112314	Neurotransmitter receptors and postsynaptic signal transmission	-2.5243	-0.603484	10/205	320,817,2790,2890,4193,5613,7102,23236,55327,196883	APBA1,CAMK2D,GNG10,GRIA1,MDM2,PRKX,TSPAN7,PLCB1,LIN7C,ADCY4
12_Member	Reactome Gene Sets	R-HSA-112315	Transmission across Chemical Synapses	-2.13669	-0.334995	11/270	320,817,2790,2890,4193,5613,7102,23236,55327,55799,196883	APBA1,CAMK2D,GNG10,GRIA1,MDM2,PRKX,TSPAN7,PLCB1,LIN7C,CACNA2D3,ADCY4
13_Summary	GO Biological Processes	GO:0072132	mesenchyme morphogenesis	-3.6361	-1.50528	6/51	72,4193,4194,4488,6909,7474,1021,23112,26523,6608,2260,6664,25937,340665,3667,5605,91875,1081,3814,3777,7012,29904,112398,378938	ACTG2,MDM2,MDM4,MSX2,TBX2,WNT5A,CDK6,TNRC6B,AGO1,SMO,FGFR1,SOX11,WWTR1,CYP26C1,IRS1,MAP2K2,TTC5,CGA,KISS1,KCNK3,TERC,EEF2K,EGLN2,MALAT1
13_Member	GO Biological Processes	GO:0072132	mesenchyme morphogenesis	-3.6361	-1.50528	6/51	72,4193,4194,4488,6909,7474	ACTG2,MDM2,MDM4,MSX2,TBX2,WNT5A
13_Member	Reactome Gene Sets	R-HSA-2559585	Oncogene Induced Senescence	-3.63448	-1.50528	5/33	1021,4193,4194,23112,26523	CDK6,MDM2,MDM4,TNRC6B,AGO1
13_Member	GO Biological Processes	GO:0003283	atrial septum development	-3.23364	-1.15177	4/23	4193,4194,6608,7474	MDM2,MDM4,SMO,WNT5A
13_Member	GO Biological Processes	GO:0060485	mesenchyme development	-2.65649	-0.69719	11/230	72,2260,4193,4194,4488,6608,6664,6909,7474,25937,340665	ACTG2,FGFR1,MDM2,MDM4,MSX2,SMO,SOX11,TBX2,WNT5A,WWTR1,CYP26C1
13_Member	WikiPathways	WP2261	Glioblastoma signaling pathways	-2.51435	-0.595797	6/83	1021,2260,3667,4193,4194,5605	CDK6,FGFR1,IRS1,MDM2,MDM4,MAP2K2
13_Member	GO Biological Processes	GO:0003203	endocardial cushion morphogenesis	-2.48695	-0.58274	4/36	4193,4194,4488,6909	MDM2,MDM4,MSX2,TBX2
13_Member	GO Biological Processes	GO:0003230	cardiac atrium development	-2.4431	-0.546663	4/37	4193,4194,6608,7474	MDM2,MDM4,SMO,WNT5A
13_Member	Reactome Gene Sets	R-HSA-6804760	Regulation of TP53 Activity through Methylation	-2.40251	-0.514908	3/19	4193,4194,91875	MDM2,MDM4,TTC5
13_Member	WikiPathways	WP3998	Prader-Willi and Angelman syndrome	-2.25922	-0.421741	5/66	1021,1081,3814,4193,4194	CDK6,CGA,KISS1,MDM2,MDM4
13_Member	GO Biological Processes	GO:0003197	endocardial cushion development	-2.10267	-0.308657	4/46	4193,4194,4488,6909	MDM2,MDM4,MSX2,TBX2
13_Member	GO Biological Processes	GO:0036294	cellular response to decreased oxygen levels	-2.02019	-0.248693	7/137	3777,4193,4194,7012,29904,112398,378938	KCNK3,MDM2,MDM4,TERC,EEF2K,EGLN2,MALAT1
14_Summary	GO Biological Processes	GO:0048736	appendage development	-3.59037	-1.4664	11/177	257,2201,3899,4488,6664,6909,7474,8200,23657,51588,60529,1021,8994,25819,25937,222663,4681	ALX3,FBN2,AFF3,MSX2,SOX11,TBX2,WNT5A,GDF5,SLC7A11,PIAS4,ALX4,CDK6,LIMD1,NOCT,WWTR1,SCUBE3,NBL1
14_Member	GO Biological Processes	GO:0048736	appendage development	-3.59037	-1.4664	11/177	257,2201,3899,4488,6664,6909,7474,8200,23657,51588,60529	ALX3,FBN2,AFF3,MSX2,SOX11,TBX2,WNT5A,GDF5,SLC7A11,PIAS4,ALX4
14_Member	GO Biological Processes	GO:0060173	limb development	-3.59037	-1.4664	11/177	257,2201,3899,4488,6664,6909,7474,8200,23657,51588,60529	ALX3,FBN2,AFF3,MSX2,SOX11,TBX2,WNT5A,GDF5,SLC7A11,PIAS4,ALX4
14_Member	GO Biological Processes	GO:0035137	hindlimb morphogenesis	-3.51069	-1.3919	5/35	257,3899,4488,8200,60529	ALX3,AFF3,MSX2,GDF5,ALX4
14_Member	GO Biological Processes	GO:0035107	appendage morphogenesis	-3.09828	-1.04361	9/142	257,2201,3899,4488,6664,6909,7474,8200,60529	ALX3,FBN2,AFF3,MSX2,SOX11,TBX2,WNT5A,GDF5,ALX4
14_Member	GO Biological Processes	GO:0035108	limb morphogenesis	-3.09828	-1.04361	9/142	257,2201,3899,4488,6664,6909,7474,8200,60529	ALX3,FBN2,AFF3,MSX2,SOX11,TBX2,WNT5A,GDF5,ALX4
14_Member	GO Biological Processes	GO:0030326	embryonic limb morphogenesis	-2.97719	-0.942262	8/119	257,2201,3899,4488,6909,7474,8200,60529	ALX3,FBN2,AFF3,MSX2,TBX2,WNT5A,GDF5,ALX4
14_Member	GO Biological Processes	GO:0035113	embryonic appendage morphogenesis	-2.97719	-0.942262	8/119	257,2201,3899,4488,6909,7474,8200,60529	ALX3,FBN2,AFF3,MSX2,TBX2,WNT5A,GDF5,ALX4
14_Member	GO Biological Processes	GO:0035116	embryonic hindlimb morphogenesis	-2.89901	-0.882735	4/28	257,3899,4488,60529	ALX3,AFF3,MSX2,ALX4
14_Member	GO Biological Processes	GO:0045667	regulation of osteoblast differentiation	-2.60903	-0.663743	8/136	1021,2201,4488,6664,8994,25819,25937,222663	CDK6,FBN2,MSX2,SOX11,LIMD1,NOCT,WWTR1,SCUBE3
14_Member	GO Biological Processes	GO:0035136	forelimb morphogenesis	-2.40063	-0.514846	4/38	257,4488,8200,60529	ALX3,MSX2,GDF5,ALX4
14_Member	GO Biological Processes	GO:0030513	positive regulation of BMP signaling pathway	-2.31955	-0.464379	4/40	4488,6664,8200,222663	MSX2,SOX11,GDF5,SCUBE3
14_Member	GO Biological Processes	GO:0045669	positive regulation of osteoblast differentiation	-2.05151	-0.273029	5/74	2201,4488,6664,25937,222663	FBN2,MSX2,SOX11,WWTR1,SCUBE3
14_Member	GO Biological Processes	GO:0030510	regulation of BMP signaling pathway	-2.02045	-0.248693	6/105	4488,4681,6664,7474,8200,222663	MSX2,NBL1,SOX11,WNT5A,GDF5,SCUBE3
15_Summary	GO Biological Processes	GO:1901214	regulation of neuron death	-3.42979	-1.3167	15/313	1630,2149,2353,2539,2729,2914,4217,4915,7474,8200,8326,10763,23098,23657,112398	DCC,F2R,FOS,G6PD,GCLC,GRM4,MAP3K5,NTRK2,WNT5A,GDF5,FZD9,NES,SARM1,SLC7A11,EGLN2
15_Member	GO Biological Processes	GO:1901214	regulation of neuron death	-3.42979	-1.3167	15/313	1630,2149,2353,2539,2729,2914,4217,4915,7474,8200,8326,10763,23098,23657,112398	DCC,F2R,FOS,G6PD,GCLC,GRM4,MAP3K5,NTRK2,WNT5A,GDF5,FZD9,NES,SARM1,SLC7A11,EGLN2
15_Member	GO Biological Processes	GO:0043523	regulation of neuron apoptotic process	-2.00917	-0.247703	9/207	2149,2539,2729,2914,4915,8200,8326,10763,112398	F2R,G6PD,GCLC,GRM4,NTRK2,GDF5,FZD9,NES,EGLN2
16_Summary	GO Biological Processes	GO:0021537	telencephalon development	-3.42786	-1.3167	13/247	1021,4771,4915,5455,6331,6608,7474,10642,23236,23657,26047,55079,84750,357,463,613,2539,3777,4826,6657,6712,9118,10763,84197,340784	CDK6,NF2,NTRK2,POU3F3,SCN5A,SMO,WNT5A,IGF2BP1,PLCB1,SLC7A11,CNTNAP2,FEZF2,FUT10,SHROOM2,ZFHX3,BCR,G6PD,KCNK3,NNAT,SOX2,SPTBN2,INA,NES,POMK,HMX3
16_Member	GO Biological Processes	GO:0021537	telencephalon development	-3.42786	-1.3167	13/247	1021,4771,4915,5455,6331,6608,7474,10642,23236,23657,26047,55079,84750	CDK6,NF2,NTRK2,POU3F3,SCN5A,SMO,WNT5A,IGF2BP1,PLCB1,SLC7A11,CNTNAP2,FEZF2,FUT10
16_Member	GO Biological Processes	GO:0021543	pallium development	-3.14864	-1.07842	10/169	1021,4771,4915,5455,6608,10642,23236,26047,55079,84750	CDK6,NF2,NTRK2,POU3F3,SMO,IGF2BP1,PLCB1,CNTNAP2,FEZF2,FUT10
16_Member	GO Biological Processes	GO:0007420	brain development	-2.93168	-0.903376	25/742	357,463,613,1021,2539,3777,4771,4826,4915,5455,6331,6608,6657,6712,7474,9118,10642,10763,23236,23657,26047,55079,84197,84750,340784	SHROOM2,ZFHX3,BCR,CDK6,G6PD,KCNK3,NF2,NNAT,NTRK2,POU3F3,SCN5A,SMO,SOX2,SPTBN2,WNT5A,INA,IGF2BP1,NES,PLCB1,SLC7A11,CNTNAP2,FEZF2,POMK,FUT10,HMX3
16_Member	GO Biological Processes	GO:0060322	head development	-2.58943	-0.652678	25/787	357,463,613,1021,2539,3777,4771,4826,4915,5455,6331,6608,6657,6712,7474,9118,10642,10763,23236,23657,26047,55079,84197,84750,340784	SHROOM2,ZFHX3,BCR,CDK6,G6PD,KCNK3,NF2,NNAT,NTRK2,POU3F3,SCN5A,SMO,SOX2,SPTBN2,WNT5A,INA,IGF2BP1,NES,PLCB1,SLC7A11,CNTNAP2,FEZF2,POMK,FUT10,HMX3
16_Member	GO Biological Processes	GO:0030900	forebrain development	-2.2429	-0.412357	14/375	1021,4771,4915,5455,6331,6608,6657,7474,10642,23236,23657,26047,55079,84750	CDK6,NF2,NTRK2,POU3F3,SCN5A,SMO,SOX2,WNT5A,IGF2BP1,PLCB1,SLC7A11,CNTNAP2,FEZF2,FUT10
17_Summary	GO Biological Processes	GO:0045454	cell redox homeostasis	-3.39493	-1.29376	5/37	2729,2936,4842,51022,112398,2539,23474,23657,1081,10588,256987,441024	GCLC,GSR,NOS1,GLRX2,EGLN2,G6PD,ETHE1,SLC7A11,CGA,MTHFS,SERINC5,MTHFD2L
17_Member	GO Biological Processes	GO:0045454	cell redox homeostasis	-3.39493	-1.29376	5/37	2729,2936,4842,51022,112398	GCLC,GSR,NOS1,GLRX2,EGLN2
17_Member	GO Biological Processes	GO:0006749	glutathione metabolic process	-3.09804	-1.04361	6/64	2539,2729,2936,23474,23657,51022	G6PD,GCLC,GSR,ETHE1,SLC7A11,GLRX2
17_Member	GO Biological Processes	GO:0006575	cellular modified amino acid metabolic process	-2.92138	-0.897612	10/181	1081,2539,2729,2936,10588,23474,23657,51022,256987,441024	CGA,G6PD,GCLC,GSR,MTHFS,ETHE1,SLC7A11,GLRX2,SERINC5,MTHFD2L
17_Member	WikiPathways	WP100	Glutathione metabolism	-2.16263	-0.352502	3/23	2539,2729,2936	G6PD,GCLC,GSR
18_Summary	GO Biological Processes	GO:0051963	regulation of synapse assembly	-3.39246	-1.29374	8/103	4884,4915,7162,7474,26045,29904,114798,375790,23657,81926,91752,26047	NPTX1,NTRK2,TPBG,WNT5A,LRRTM2,EEF2K,SLITRK1,AGRN,SLC7A11,ABHD17A,ZNF804A,CNTNAP2
18_Member	GO Biological Processes	GO:0051963	regulation of synapse assembly	-3.39246	-1.29374	8/103	4884,4915,7162,7474,26045,29904,114798,375790	NPTX1,NTRK2,TPBG,WNT5A,LRRTM2,EEF2K,SLITRK1,AGRN
18_Member	GO Biological Processes	GO:0051965	positive regulation of synapse assembly	-3.17177	-1.09692	6/62	4915,7162,26045,29904,114798,375790	NTRK2,TPBG,LRRTM2,EEF2K,SLITRK1,AGRN
18_Member	GO Biological Processes	GO:0050807	regulation of synapse organization	-3.02033	-0.978998	11/207	4884,4915,7162,7474,23657,26045,29904,81926,91752,114798,375790	NPTX1,NTRK2,TPBG,WNT5A,SLC7A11,LRRTM2,EEF2K,ABHD17A,ZNF804A,SLITRK1,AGRN
18_Member	GO Biological Processes	GO:0050803	regulation of synapse structure or activity	-2.92002	-0.897612	11/213	4884,4915,7162,7474,23657,26045,29904,81926,91752,114798,375790	NPTX1,NTRK2,TPBG,WNT5A,SLC7A11,LRRTM2,EEF2K,ABHD17A,ZNF804A,SLITRK1,AGRN
18_Member	GO Biological Processes	GO:1901890	positive regulation of cell junction assembly	-2.67226	-0.711185	7/104	4915,7162,26045,26047,29904,114798,375790	NTRK2,TPBG,LRRTM2,CNTNAP2,EEF2K,SLITRK1,AGRN
18_Member	GO Biological Processes	GO:0099175	regulation of postsynapse organization	-2.48836	-0.58274	6/84	4884,7474,26045,29904,81926,91752	NPTX1,WNT5A,LRRTM2,EEF2K,ABHD17A,ZNF804A
18_Member	GO Biological Processes	GO:1901888	regulation of cell junction assembly	-2.08795	-0.297572	9/201	4884,4915,7162,7474,26045,26047,29904,114798,375790	NPTX1,NTRK2,TPBG,WNT5A,LRRTM2,CNTNAP2,EEF2K,SLITRK1,AGRN
19_Summary	GO Biological Processes	GO:0070585	protein localization to mitochondrion	-3.37862	-1.28329	7/79	637,9636,10245,26521,51025,90580,285521,514,2729,4884,8326,3954,9997,51241,55969,84275,116228,284184	BID,ISG15,TIMM17B,TIMM8B,PAM16,TIMM29,COX18,ATP5F1E,GCLC,NPTX1,FZD9,LETM1,SCO2,COX16,RAB5IF,SLC25A33,COX20,NDUFAF8
19_Member	GO Biological Processes	GO:0070585	protein localization to mitochondrion	-3.37862	-1.28329	7/79	637,9636,10245,26521,51025,90580,285521	BID,ISG15,TIMM17B,TIMM8B,PAM16,TIMM29,COX18
19_Member	GO Biological Processes	GO:0006839	mitochondrial transport	-3.37712	-1.28329	10/158	514,637,2729,4884,8326,10245,26521,51025,90580,285521	ATP5F1E,BID,GCLC,NPTX1,FZD9,TIMM17B,TIMM8B,PAM16,TIMM29,COX18
19_Member	GO Biological Processes	GO:0072655	establishment of protein localization to mitochondrion	-2.86061	-0.84838	6/71	637,10245,26521,51025,90580,285521	BID,TIMM17B,TIMM8B,PAM16,TIMM29,COX18
19_Member	GO Biological Processes	GO:0007005	mitochondrion organization	-2.59248	-0.652678	16/418	637,2729,3954,4884,8326,9997,10245,26521,51025,51241,55969,84275,90580,116228,284184,285521	BID,GCLC,LETM1,NPTX1,FZD9,SCO2,TIMM17B,TIMM8B,PAM16,COX16,RAB5IF,SLC25A33,TIMM29,COX20,NDUFAF8,COX18
19_Member	GO Biological Processes	GO:0006626	protein targeting to mitochondrion	-2.5341	-0.60717	5/57	637,10245,26521,51025,90580	BID,TIMM17B,TIMM8B,PAM16,TIMM29
19_Member	GO Biological Processes	GO:0007006	mitochondrial membrane organization	-2.46951	-0.566874	7/113	637,2729,3954,8326,26521,90580,285521	BID,GCLC,LETM1,FZD9,TIMM8B,TIMM29,COX18
19_Member	GO Biological Processes	GO:0051204	protein insertion into mitochondrial membrane	-2.276	-0.437168	3/21	26521,90580,285521	TIMM8B,TIMM29,COX18
19_Member	GO Biological Processes	GO:0090151	establishment of protein localization to mitochondrial membrane	-2.0601	-0.278669	3/25	26521,90580,285521	TIMM8B,TIMM29,COX18
20_Summary	WikiPathways	WP2447	Amyotrophic lateral sclerosis (ALS)	-3.33977	-1.24836	5/38	637,2890,4217,4842,5605	BID,GRIA1,MAP3K5,NOS1,MAP2K2
20_Member	WikiPathways	WP2447	Amyotrophic lateral sclerosis (ALS)	-3.33977	-1.24836	5/38	637,2890,4217,4842,5605	BID,GRIA1,MAP3K5,NOS1,MAP2K2
