# Supplementary material for: Transcriptional profiling of Hutchinson-Gilford Progeria syndrome fibroblasts reveals deficits in mesenchymal stem cell commitment to differentiation related to early events in endochondral ossification
Source: eLife journal article supplement (doi:10.7554/elife.81290), 2022-12-29
Supplement: table2-data1 [file metascape_result.xlsx]

## Sheet: Annotation
MyList	Gene ID	Type	Tax ID	Homologene Gene ID	Homologene Gene Tax ID	Gene Symbol	Description	Biological Process (GO)	Kinase Class (UniProt)	Protein Function (Protein Atlas)	Subcellular Location (Protein Atlas)	Drug (DrugBank)	Canonical Pathways	Hallmark Gene Sets	GO:0051051 negative regulation of transpo	R-HSA-449147 Signaling by Interleukins	GO:0042133 neurotransmitter metabolic pro	WP437 EGF/EGFR signaling pathway	GO:0001955 blood vessel maturation	hsa04621 NOD-like receptor signaling pa	R-HSA-76002 Platelet activation, signaling	GO:0007167 enzyme linked receptor protein	GO:0008154 actin polymerization or depoly	WP3888 VEGFA-VEGFR2 signaling pathway	GO:0060627 regulation of vesicle-mediated	GO:0097581 lamellipodium organization	GO:0070848 response to growth factor	CORUM:343 Sarcoglycan-sarcospan complex	GO:0002685 regulation of leukocyte migrat	GO:0030162 regulation of proteolysis	GO:0030029 actin filament-based process	R-HSA-6798695 Neutrophil degranulation	GO:0044706 multi-multicellular organism p	GO:0007389 pattern specification process
NINJ2	4815	symbol	H. sapiens	4815	H. sapiens	NINJ2	ninjurin 2	GO:0007158 neuron cell-cell adhesion;GO:0042246 tissue regeneration;GO:0031099 regeneration			Endoplasmic reticulum (Approved); Additional: Centriolar satellite;Cytosol;Nucleoplasm;Plasma membrane				0.0	0.0	0.0	0.0	0.0	0.0	0.0	0.0	0.0	0.0	0.0	0.0	0.0	0.0	0.0	0.0	0.0	0.0	0.0	0.0
CASP10	843	symbol	H. sapiens	843	H. sapiens	CASP10	caspase 10	GO:0097194 execution phase of apoptosis;GO:0006919 activation of cysteine-type endopeptidase activity involved in apoptotic process;GO:0043280 positive regulation of cysteine-type endopeptidase activity involved in apoptotic process		Human disease related genes:Immune system diseases:Primary immunodeficiency; Cancer-related genes:Candidate cancer biomarkers; ENZYME proteins:Hydrolases; Peptidases:Cysteine-type peptidases; Disease related genes; Potential drug targets; Enzymes; Predicted intracellular proteins	Golgi apparatus (Approved); Additional: Vesicles		(M7997)SA CASPASE CASCADE; (M79)PID TRAIL PATHWAY; (M94)PID FAS PATHWAY	(M5921)HALLMARK COMPLEMENT	0.0	0.0	0.0	0.0	0.0	1.0	0.0	0.0	0.0	0.0	0.0	0.0	0.0	0.0	0.0	1.0	0.0	0.0	0.0	0.0
RAET1E	135250	symbol	H. sapiens	135250	H. sapiens	RAET1E	retinoic acid early transcript 1E	GO:0045954 positive regulation of natural killer cell mediated cytotoxicity;GO:0042267 natural killer cell mediated cytotoxicity;GO:0002717 positive regulation of natural killer cell mediated immunity		Predicted intracellular proteins	Focal adhesion sites (Supported); Additional: Cytosol				0.0	0.0	0.0	0.0	0.0	0.0	0.0	0.0	0.0	0.0	0.0	0.0	0.0	0.0	1.0	0.0	0.0	0.0	0.0	0.0
LRRC6	23639	gene_synonym	H. sapiens	23639	H. sapiens	DNAAF11	dynein axonemal assembly factor 11	GO:0120229 protein localization to motile cilium;GO:0060287 epithelial cilium movement involved in determination of left/right asymmetry;GO:0090660 cerebrospinal fluid circulation		Predicted intracellular proteins; Human disease related genes:Respiratory diseases:Tracheobronchial diseases; Disease related genes					0.0	0.0	0.0	0.0	0.0	0.0	0.0	0.0	0.0	0.0	0.0	1.0	0.0	0.0	0.0	0.0	0.0	0.0	0.0	1.0
MIR497HG	100506755	symbol	H. sapiens	100506755	H. sapiens	MIR497HG	mir-497-195 cluster host gene								0.0	0.0	0.0	0.0	0.0	0.0	0.0	0.0	0.0	0.0	0.0	0.0	0.0	0.0	0.0	0.0	0.0	0.0	0.0	0.0
PAQR5	54852	symbol	H. sapiens	54852	H. sapiens	PAQR5	progestin and adipoQ receptor family member 5	GO:0048477 oogenesis;GO:0007292 female gamete generation;GO:0007281 germ cell development			Vesicles (Approved)				0.0	0.0	0.0	0.0	0.0	0.0	0.0	0.0	0.0	0.0	0.0	0.0	0.0	0.0	0.0	0.0	0.0	0.0	0.0	0.0
SHE	126669	symbol	H. sapiens	126669	H. sapiens	SHE	Src homology 2 domain containing E			Predicted secreted proteins; Predicted intracellular proteins	Nucleoplasm (Approved); Additional: Cytosol			(M5951)HALLMARK SPERMATOGENESIS; (M5947)HALLMARK IL2 STAT5 SIGNALING	0.0	0.0	0.0	0.0	0.0	0.0	0.0	0.0	0.0	0.0	0.0	0.0	0.0	0.0	0.0	0.0	0.0	0.0	0.0	0.0
C10orf11	83938	gene_synonym	H. sapiens	83938	H. sapiens	LRMDA	leucine rich melanocyte differentiation associated	GO:0030318 melanocyte differentiation;GO:0050931 pigment cell differentiation;GO:0048066 developmental pigmentation		Human disease related genes:Congenital disorders of metabolism:Congenital disorders of amino acid metabolism; Predicted intracellular proteins; Disease related genes	Nucleoplasm (Supported); Additional: Cytosol				0.0	0.0	0.0	0.0	0.0	0.0	0.0	0.0	0.0	0.0	0.0	0.0	0.0	0.0	0.0	0.0	0.0	0.0	0.0	0.0
SFRP2	6423	symbol	H. sapiens	6423	H. sapiens	SFRP2	secreted frizzled related protein 2	GO:0061185 negative regulation of dermatome development;GO:2000040 regulation of planar cell polarity pathway involved in axis elongation;GO:2000041 negative regulation of planar cell polarity pathway involved in axis elongation		Predicted secreted proteins	Intermediate filaments (Approved)		(M5883)NABA SECRETED FACTORS; (M5885)NABA MATRISOME ASSOCIATED; (M5889)NABA MATRISOME		0.0	0.0	0.0	0.0	1.0	0.0	0.0	0.0	0.0	0.0	0.0	0.0	0.0	0.0	0.0	1.0	1.0	0.0	0.0	1.0
LINC01436	100996609	symbol	H. sapiens	100996609	H. sapiens	LINC01436	long intergenic non-protein coding RNA 1436								0.0	0.0	0.0	0.0	0.0	0.0	0.0	0.0	0.0	0.0	0.0	0.0	0.0	0.0	0.0	0.0	0.0	0.0	0.0	0.0
EMX2OS	196047	symbol	H. sapiens	196047	H. sapiens	EMX2OS	EMX2 opposite strand/antisense RNA								0.0	0.0	0.0	0.0	0.0	0.0	0.0	0.0	0.0	0.0	0.0	0.0	0.0	0.0	0.0	0.0	0.0	0.0	0.0	0.0
ASPA	443	symbol	H. sapiens	443	H. sapiens	ASPA	aspartoacylase	GO:0006533 aspartate catabolic process;GO:0006531 aspartate metabolic process;GO:0009068 aspartate family amino acid catabolic process		ENZYME proteins:Hydrolases; Predicted intracellular proteins; Human disease related genes:Congenital disorders of metabolism:Congenital disorders of amino acid metabolism; Disease related genes; Potential drug targets; Enzymes; Human disease related genes:Nervous system diseases:Neurodegenerative diseases	Cytosol (Supported)	Aspartic acid; Zinc; Zinc acetate; Zinc chloride; Zinc sulfate, unspecified form			0.0	0.0	1.0	0.0	0.0	0.0	0.0	0.0	0.0	0.0	0.0	0.0	0.0	0.0	0.0	0.0	0.0	0.0	0.0	0.0
LINC00595	414243	symbol	H. sapiens	414243	H. sapiens	LINC00595	long intergenic non-protein coding RNA 595								0.0	0.0	0.0	0.0	0.0	0.0	0.0	0.0	0.0	0.0	0.0	0.0	0.0	0.0	0.0	0.0	0.0	0.0	0.0	0.0
ENPP5	59084	symbol	H. sapiens	59084	H. sapiens	ENPP5	ectonucleotide pyrophosphatase/phosphodiesterase family member 5	GO:0007154 cell communication;GO:0009987 cellular process;GO:0008150 biological_process			Cytosol (Approved); Additional: Nucleoplasm				0.0	0.0	0.0	0.0	0.0	0.0	0.0	0.0	0.0	0.0	0.0	0.0	0.0	0.0	0.0	0.0	0.0	0.0	0.0	0.0
OLFM1	10439	symbol	H. sapiens	10439	H. sapiens	OLFM1	olfactomedin 1	GO:0023041 neuronal signal transduction;GO:0003190 atrioventricular valve formation;GO:0003188 heart valve formation		Predicted secreted proteins; Predicted intracellular proteins	Nucleoli (Approved); Additional: Cytosol;Nucleoplasm			(M5941)HALLMARK UV RESPONSE UP; (M5906)HALLMARK ESTROGEN RESPONSE EARLY; (M5907)HALLMARK ESTROGEN RESPONSE LATE	0.0	0.0	0.0	0.0	0.0	0.0	0.0	0.0	0.0	0.0	0.0	0.0	0.0	0.0	0.0	0.0	0.0	0.0	0.0	0.0
CLDN7	1366	symbol	H. sapiens	1366	H. sapiens	CLDN7	claudin 7	GO:0016338 calcium-independent cell-cell adhesion via plasma membrane cell-adhesion molecules;GO:0070830 bicellular tight junction assembly;GO:0120192 tight junction assembly		Transporters:Transporter channels and pores; Predicted intracellular proteins; Cancer-related genes:Candidate cancer biomarkers	Vesicles (Approved); Additional: Cell Junctions			(M5906)HALLMARK ESTROGEN RESPONSE EARLY; (M5915)HALLMARK APICAL JUNCTION	0.0	0.0	0.0	0.0	0.0	1.0	0.0	0.0	0.0	0.0	0.0	0.0	0.0	0.0	0.0	0.0	0.0	0.0	0.0	0.0
CARD6	84674	symbol	H. sapiens	84674	H. sapiens	CARD6	caspase recruitment domain family member 6	GO:0006915 apoptotic process;GO:0012501 programmed cell death;GO:0008219 cell death		Predicted intracellular proteins					0.0	0.0	0.0	0.0	0.0	1.0	0.0	0.0	0.0	0.0	0.0	0.0	0.0	0.0	0.0	0.0	0.0	0.0	0.0	0.0
ADGRD1	283383	symbol	H. sapiens	283383	H. sapiens	ADGRD1	adhesion G protein-coupled receptor D1	GO:0007189 adenylate cyclase-activating G protein-coupled receptor signaling pathway;GO:0007188 adenylate cyclase-modulating G protein-coupled receptor signaling pathway;GO:0007186 G protein-coupled receptor signaling pathway		G-protein coupled receptors:GPCRs excl olfactory receptors; Predicted intracellular proteins; G-protein coupled receptors:Family 2 (B) receptors	Nucleoplasm;Plasma membrane (Approved)	Onapristone			0.0	0.0	0.0	0.0	0.0	0.0	0.0	0.0	0.0	0.0	0.0	0.0	0.0	0.0	0.0	0.0	0.0	0.0	0.0	0.0
LOC100287846	100287846	Gene_ID	H. sapiens	100287846	H. sapiens	LOC100287846	uncharacterized LOC100287846								0.0	0.0	0.0	0.0	0.0	0.0	0.0	0.0	0.0	0.0	0.0	0.0	0.0	0.0	0.0	0.0	0.0	0.0	0.0	0.0
SLC22A15	55356	symbol	H. sapiens	55356	H. sapiens	SLC22A15	solute carrier family 22 member 15	GO:0055085 transmembrane transport;GO:0006811 ion transport;GO:0006810 transport		Transporters:Electrochemical Potential-driven transporters					0.0	0.0	0.0	0.0	0.0	0.0	0.0	0.0	0.0	0.0	0.0	0.0	0.0	0.0	0.0	0.0	0.0	0.0	0.0	0.0
EMX2	2018	symbol	H. sapiens	2018	H. sapiens	EMX2	empty spiracles homeobox 2	GO:0072197 ureter morphogenesis;GO:0021796 cerebral cortex regionalization;GO:0021978 telencephalon regionalization		Transcription factors:Helix-turn-helix domains; Human disease related genes:Congenital malformations:Congenital malformations of the nervous system; Predicted intracellular proteins; Disease related genes	Nucleoplasm (Approved)				0.0	0.0	0.0	0.0	1.0	0.0	0.0	0.0	0.0	0.0	0.0	0.0	0.0	0.0	0.0	0.0	0.0	0.0	0.0	1.0
BHLHE41	79365	symbol	H. sapiens	79365	H. sapiens	BHLHE41	basic helix-loop-helix family member e41	GO:0010944 negative regulation of transcription by competitive promoter binding;GO:0010832 negative regulation of myotube differentiation;GO:0051154 negative regulation of striated muscle cell differentiation		Transcription factors:Basic domains; Predicted intracellular proteins	Nucleoplasm (Supported); Additional: Vesicles		(M255)PID HIF1 TFPATHWAY		0.0	0.0	0.0	0.0	0.0	0.0	0.0	0.0	0.0	0.0	0.0	0.0	0.0	0.0	0.0	0.0	0.0	0.0	0.0	1.0
IRAK3	11213	symbol	H. sapiens	11213	H. sapiens	IRAK3	interleukin 1 receptor associated kinase 3	GO:0010932 regulation of macrophage tolerance induction;GO:0010933 positive regulation of macrophage tolerance induction;GO:0010936 negative regulation of macrophage cytokine production	TKL Ser/Thr protein kinase family	Kinases:TKL Ser/Thr protein kinases; Disease related genes; Potential drug targets; Enzymes; Predicted intracellular proteins; ENZYME proteins:Transferases	Vesicles (Approved)	Fostamatinib	(M110)PID IL1 PATHWAY		0.0	1.0	0.0	0.0	0.0	1.0	0.0	0.0	0.0	0.0	0.0	0.0	0.0	0.0	0.0	0.0	0.0	0.0	0.0	0.0
PRIMA1	145270	symbol	H. sapiens	145270	H. sapiens	PRIMA1	proline rich membrane anchor 1	GO:0042135 neurotransmitter catabolic process;GO:0042133 neurotransmitter metabolic process;GO:0001505 regulation of neurotransmitter levels			Plasma membrane (Approved); Additional: Cytosol;Nucleoli				0.0	0.0	1.0	0.0	0.0	0.0	0.0	0.0	0.0	0.0	0.0	0.0	0.0	0.0	0.0	0.0	0.0	0.0	0.0	0.0
WISP2	8839	gene_synonym	H. sapiens	8839	H. sapiens	CCN5	cellular communication network factor 5	GO:0007155 cell adhesion;GO:0022610 biological adhesion;GO:0007267 cell-cell signaling		Predicted secreted proteins			(M3008)NABA ECM GLYCOPROTEINS; (M5884)NABA CORE MATRISOME; (M5889)NABA MATRISOME	(M5891)HALLMARK HYPOXIA; (M5906)HALLMARK ESTROGEN RESPONSE EARLY; (M5907)HALLMARK ESTROGEN RESPONSE LATE	0.0	0.0	0.0	0.0	0.0	0.0	0.0	0.0	0.0	0.0	0.0	0.0	0.0	0.0	0.0	0.0	0.0	0.0	0.0	0.0
ABI1	10006	symbol	H. sapiens	10006	H. sapiens	ABI1	abl interactor 1	GO:0072673 lamellipodium morphogenesis;GO:0035855 megakaryocyte development;GO:0030219 megakaryocyte differentiation		Predicted intracellular proteins; Cancer-related genes; Disease related genes	Cell Junctions;Plasma membrane (Approved)		(M277)PID INTEGRIN A4B1 PATHWAY; (M241)PID RAC1 REG PATHWAY; (M156)PID ECADHERIN NASCENT AJ PATHWAY	(M5893)HALLMARK MITOTIC SPINDLE; (M5932)HALLMARK INFLAMMATORY RESPONSE; (M5950)HALLMARK ALLOGRAFT REJECTION	0.0	0.0	0.0	1.0	0.0	1.0	0.0	1.0	1.0	0.0	0.0	1.0	0.0	0.0	0.0	0.0	1.0	0.0	0.0	1.0
MSTN	2660	symbol	H. sapiens	2660	H. sapiens	MSTN	myostatin	GO:0048632 negative regulation of skeletal muscle tissue growth;GO:0014839 myoblast migration involved in skeletal muscle regeneration;GO:0014859 negative regulation of skeletal muscle cell proliferation		Predicted secreted proteins; Human disease related genes:Musculoskeletal diseases:Muscular diseases; Disease related genes		MYO-029	(M5883)NABA SECRETED FACTORS; (M5885)NABA MATRISOME ASSOCIATED; (M5889)NABA MATRISOME		0.0	0.0	0.0	0.0	0.0	0.0	0.0	1.0	0.0	0.0	0.0	0.0	1.0	0.0	1.0	0.0	0.0	0.0	1.0	0.0
SGCG	6445	symbol	H. sapiens	6445	H. sapiens	SGCG	sarcoglycan gamma	GO:0060047 heart contraction;GO:0003015 heart process;GO:0048738 cardiac muscle tissue development		Human disease related genes:Musculoskeletal diseases:Muscular diseases; Disease related genes				(M5909)HALLMARK MYOGENESIS; (M5930)HALLMARK EPITHELIAL MESENCHYMAL TRANSITION	0.0	0.0	0.0	0.0	0.0	0.0	0.0	0.0	0.0	0.0	0.0	0.0	0.0	1.0	0.0	0.0	0.0	0.0	1.0	0.0
HERC3	8916	symbol	H. sapiens	8916	H. sapiens	HERC3	HECT and RLD domain containing E3 ubiquitin protein ligase 3	GO:0016567 protein ubiquitination;GO:0032446 protein modification by small protein conjugation;GO:0070647 protein modification by small protein conjugation or removal		Enzymes; Predicted intracellular proteins; ENZYME proteins:Transferases	Cytosol (Supported, Approved)			(M5908)HALLMARK ANDROGEN RESPONSE	0.0	0.0	0.0	0.0	0.0	0.0	0.0	0.0	0.0	0.0	0.0	0.0	0.0	0.0	0.0	0.0	0.0	0.0	0.0	0.0
EXPH5	23086	symbol	H. sapiens	23086	H. sapiens	EXPH5	exophilin 5	GO:0003334 keratinocyte development;GO:0071985 multivesicular body sorting pathway;GO:0045921 positive regulation of exocytosis		Human disease related genes:Congenital malformations:Congenital malformations of skin; Predicted intracellular proteins; Disease related genes					0.0	0.0	0.0	0.0	0.0	0.0	0.0	0.0	0.0	0.0	1.0	0.0	0.0	0.0	0.0	0.0	0.0	0.0	0.0	0.0
IL20RB	53833	symbol	H. sapiens	53833	H. sapiens	IL20RB	interleukin 20 receptor subunit beta	GO:0001808 negative regulation of type IV hypersensitivity;GO:0002884 negative regulation of hypersensitivity;GO:0001807 regulation of type IV hypersensitivity			Vesicles (Approved); Additional: Cytosol				0.0	1.0	0.0	0.0	0.0	1.0	0.0	0.0	0.0	0.0	0.0	0.0	0.0	0.0	0.0	0.0	0.0	0.0	0.0	0.0
TMBIM6	7009	symbol	H. sapiens	7009	H. sapiens	TMBIM6	transmembrane BAX inhibitor motif containing 6	GO:0060701 negative regulation of ribonuclease activity;GO:0060702 negative regulation of endoribonuclease activity;GO:0060699 regulation of endoribonuclease activity		Transporters:Transporter channels and pores; Predicted intracellular proteins				(M5941)HALLMARK UV RESPONSE UP; (M5934)HALLMARK XENOBIOTIC METABOLISM	1.0	0.0	0.0	0.0	0.0	1.0	0.0	0.0	0.0	0.0	0.0	0.0	0.0	0.0	0.0	0.0	0.0	0.0	0.0	0.0
STK38	11329	symbol	H. sapiens	11329	H. sapiens	STK38	serine/threonine kinase 38	GO:0043407 negative regulation of MAP kinase activity;GO:0071901 negative regulation of protein serine/threonine kinase activity;GO:0043409 negative regulation of MAPK cascade	AGC Ser/Thr protein kinase family	Enzymes; Kinases:AGC Ser/Thr protein kinases; Predicted intracellular proteins; ENZYME proteins:Transferases	Cytosol (Approved)	Fostamatinib			0.0	0.0	0.0	0.0	0.0	1.0	0.0	0.0	0.0	0.0	0.0	0.0	0.0	0.0	0.0	0.0	0.0	0.0	0.0	0.0
MAOA	4128	symbol	H. sapiens	4128	H. sapiens	MAOA	monoamine oxidase A	GO:0019614 catechol-containing compound catabolic process;GO:0042420 dopamine catabolic process;GO:0042424 catecholamine catabolic process		FDA approved drug targets:Small molecule drugs; Human disease related genes:Other diseases:Mental and behavioural disorders; ENZYME proteins:Oxidoreductases; Human disease related genes:Congenital disorders of metabolism:Congenital disorders of amino acid metabolism; Disease related genes; Enzymes	Mitochondria (Supported); Additional: Cytosol	Amphetamine; Phentermine; Procaine; Tranylcypromine; Phenelzine; Minaprine; Zonisamide; Selegiline; Procarbazine; Moclobemide; Isocarboxazid; Ephedra sinica root; MMDA; 4-Methoxyamphetamine; Metamfetamine; Pargyline; Flavin adenine dinucleotide; Clorgiline; Nialamide; Nomifensine; Zimelidine; Posizolid; CX157; Decyl(dimethyl)phosphine oxide; Harmine; Pirlindole; Toloxatone; Brofaromine; Flortauci…		(M5935)HALLMARK FATTY ACID METABOLISM; (M5941)HALLMARK UV RESPONSE UP; (M5934)HALLMARK XENOBIOTIC METABOLISM	0.0	1.0	1.0	0.0	0.0	0.0	0.0	0.0	0.0	0.0	0.0	0.0	0.0	0.0	0.0	0.0	0.0	0.0	0.0	0.0
BCL6B	255877	symbol	H. sapiens	255877	H. sapiens	BCL6B	BCL6B transcription repressor	GO:0042092 type 2 immune response;GO:0050727 regulation of inflammatory response;GO:0031347 regulation of defense response		Predicted intracellular proteins; Transcription factors:Zinc-coordinating DNA-binding domains	Nucleoplasm (Approved); Additional: Plasma membrane;Vesicles				0.0	0.0	0.0	0.0	0.0	0.0	0.0	0.0	0.0	0.0	0.0	0.0	0.0	0.0	0.0	0.0	0.0	0.0	0.0	0.0
XG	7499	symbol	H. sapiens	7499	H. sapiens	XG	Xg glycoprotein (Xg blood group)	GO:2000391 positive regulation of neutrophil extravasation;GO:2000389 regulation of neutrophil extravasation;GO:0072683 T cell extravasation		Blood group antigen proteins					0.0	0.0	0.0	0.0	0.0	0.0	0.0	0.0	0.0	0.0	0.0	0.0	0.0	0.0	1.0	0.0	0.0	0.0	0.0	0.0
SERPING1	710	symbol	H. sapiens	710	H. sapiens	SERPING1	serpin family G member 1	GO:0001868 regulation of complement activation, lectin pathway;GO:0001869 negative regulation of complement activation, lectin pathway;GO:0045916 negative regulation of complement activation		Human disease related genes:Cardiovascular diseases:Vascular diseases; Human disease related genes:Immune system diseases:Primary immunodeficiency; Candidate cardiovascular disease genes; Predicted secreted proteins; Disease related genes; Predicted intracellular proteins		PPL-100; Copper	(M3468)NABA ECM REGULATORS; (M5885)NABA MATRISOME ASSOCIATED; (M5889)NABA MATRISOME	(M5946)HALLMARK COAGULATION; (M5913)HALLMARK INTERFERON GAMMA RESPONSE; (M5921)HALLMARK COMPLEMENT	0.0	0.0	0.0	0.0	0.0	1.0	1.0	0.0	0.0	0.0	0.0	0.0	0.0	0.0	0.0	1.0	0.0	0.0	1.0	0.0
MYH2	4620	symbol	H. sapiens	4620	H. sapiens	MYH2	myosin heavy chain 2	GO:0030049 muscle filament sliding;GO:0033275 actin-myosin filament sliding;GO:0070252 actin-mediated cell contraction		Predicted intracellular proteins; Human disease related genes:Musculoskeletal diseases:Muscular diseases; Disease related genes	Focal adhesion sites (Uncertain)		(M277)PID INTEGRIN A4B1 PATHWAY; (M16801)SIG REGULATION OF THE ACTIN CYTOSKELETON BY RHO GTPASES; (M159)PID AMB2 NEUTROPHILS PATHWAY	(M5909)HALLMARK MYOGENESIS	0.0	0.0	0.0	0.0	0.0	0.0	0.0	0.0	1.0	0.0	0.0	0.0	0.0	0.0	0.0	0.0	1.0	0.0	0.0	0.0
IL21-AS1	100996941	symbol	H. sapiens	100996941	H. sapiens	IL21-AS1	IL21 antisense RNA 1								0.0	0.0	0.0	0.0	0.0	0.0	0.0	0.0	0.0	0.0	0.0	0.0	0.0	0.0	0.0	0.0	0.0	0.0	0.0	0.0
RABGEF1	27342	symbol	H. sapiens	27342	H. sapiens	RABGEF1	RAB guanine nucleotide exchange factor 1	GO:1900234 regulation of Kit signaling pathway;GO:1900235 negative regulation of Kit signaling pathway;GO:0043305 negative regulation of mast cell degranulation		Transporters:Transporter channels and pores; Predicted intracellular proteins	Cytosol (Supported); Additional: Nucleoli		(M269)PID RAS PATHWAY		1.0	0.0	0.0	0.0	0.0	0.0	0.0	0.0	0.0	0.0	1.0	0.0	0.0	0.0	1.0	0.0	0.0	0.0	0.0	0.0
ITGA4	3676	symbol	H. sapiens	3676	H. sapiens	ITGA4	integrin subunit alpha 4	GO:0043496 regulation of protein homodimerization activity;GO:0090074 negative regulation of protein homodimerization activity;GO:1990771 clathrin-dependent extracellular exosome endocytosis		FDA approved drug targets:Biotech drugs; Predicted intracellular proteins; CD markers; Cancer-related genes:Candidate cancer biomarkers	Plasma membrane (Approved)	Natalizumab; ATL1102; CDP323; R1295; R411; Tinzaparin; Vedolizumab	(M212)PID INTEGRIN5 PATHWAY; (M274)PID LYMPH ANGIOGENESIS PATHWAY; (M47)PID INTEGRIN CS PATHWAY	(M5897)HALLMARK IL6 JAK STAT3 SIGNALING	0.0	0.0	0.0	1.0	0.0	1.0	1.0	0.0	1.0	0.0	0.0	0.0	0.0	1.0	1.0	0.0	0.0	0.0	0.0	0.0
STARD5	80765	symbol	H. sapiens	80765	H. sapiens	STARD5	StAR related lipid transfer domain containing 5	GO:0035376 sterol import;GO:0070508 cholesterol import;GO:0120009 intermembrane lipid transfer		Predicted intracellular proteins	Vesicles (Approved); Additional: Cytosol				0.0	0.0	0.0	0.0	0.0	0.0	0.0	0.0	0.0	0.0	0.0	0.0	0.0	0.0	0.0	0.0	0.0	0.0	0.0	0.0
APBB1IP	54518	symbol	H. sapiens	54518	H. sapiens	APBB1IP	amyloid beta precursor protein binding family B member 1 interacting protein	GO:0002291 T cell activation via T cell receptor contact with antigen bound to MHC molecule on antigen presenting cell;GO:0002286 T cell activation involved in immune response;GO:0002285 lymphocyte activation involved in immune response		Predicted intracellular proteins	Cytosol;Plasma membrane (Enhanced)				0.0	0.0	0.0	1.0	0.0	0.0	1.0	0.0	0.0	0.0	0.0	0.0	0.0	0.0	0.0	0.0	0.0	0.0	0.0	0.0
IQCK	124152	symbol	H. sapiens	124152	H. sapiens	IQCK	IQ motif containing K			Predicted intracellular proteins	Nuclear speckles (Approved); Additional: Cytosol				0.0	0.0	0.0	0.0	0.0	0.0	0.0	0.0	0.0	0.0	0.0	0.0	0.0	0.0	0.0	0.0	0.0	0.0	0.0	0.0
F8	2157	symbol	H. sapiens	2157	H. sapiens	F8	coagulation factor VIII	GO:0007597 blood coagulation, intrinsic pathway;GO:0072378 blood coagulation, fibrin clot formation;GO:0072376 protein activation cascade		Candidate cardiovascular disease genes; Human disease related genes:Cardiovascular diseases:Hematologic diseases; Predicted secreted proteins; FDA approved drug targets:Biotech drugs; Disease related genes; Predicted intracellular proteins		Drotrecogin alfa; Coagulation Factor IX (Recombinant); TB-402; Thrombin; Protein C; Human thrombin; Thrombin alfa; Vonicog Alfa; Von Willebrand Factor Human; Anti-inhibitor coagulant complex; Coagulation Factor IX Human; Nonacog beta pegol; Damoctocog alfa pegol		(M5946)HALLMARK COAGULATION; (M5921)HALLMARK COMPLEMENT	0.0	0.0	0.0	0.0	0.0	0.0	1.0	0.0	0.0	0.0	0.0	0.0	0.0	0.0	0.0	0.0	0.0	0.0	0.0	0.0
APOD	347	symbol	H. sapiens	347	H. sapiens	APOD	apolipoprotein D	GO:0034443 negative regulation of lipoprotein oxidation;GO:0060588 negative regulation of lipoprotein lipid oxidation;GO:0034442 regulation of lipoprotein oxidation		Predicted secreted proteins; Candidate cardiovascular disease genes; Cancer-related genes:Candidate cancer biomarkers	Plasma membrane (Approved)	Vitamin A; Copper		(M5909)HALLMARK MYOGENESIS; (M5953)HALLMARK KRAS SIGNALING UP	1.0	0.0	0.0	0.0	1.0	0.0	0.0	0.0	0.0	0.0	0.0	0.0	0.0	0.0	1.0	0.0	0.0	0.0	0.0	0.0
GCNT1	2650	symbol	H. sapiens	2650	H. sapiens	GCNT1	glucosaminyl (N-acetyl) transferase 1	GO:0060352 cell adhesion molecule production;GO:0050901 leukocyte tethering or rolling;GO:0061756 leukocyte adhesion to vascular endothelial cell		Enzymes; Predicted intracellular proteins; ENZYME proteins:Transferases	Nuclear speckles (Supported)			(M5942)HALLMARK UV RESPONSE DN; (M5950)HALLMARK ALLOGRAFT REJECTION	0.0	0.0	0.0	0.0	0.0	0.0	0.0	0.0	0.0	0.0	0.0	0.0	0.0	0.0	0.0	0.0	0.0	0.0	0.0	0.0
ADAMTSL4	54507	symbol	H. sapiens	54507	H. sapiens	ADAMTSL4	ADAMTS like 4	GO:0002064 epithelial cell development;GO:0030198 extracellular matrix organization;GO:0043062 extracellular structure organization		Human disease related genes:Congenital malformations:Congenital malformations of eye; Predicted secreted proteins; Disease related genes	Cytosol;Plasma membrane (Approved)		(M3468)NABA ECM REGULATORS; (M5885)NABA MATRISOME ASSOCIATED; (M5889)NABA MATRISOME		0.0	0.0	0.0	0.0	0.0	0.0	0.0	0.0	0.0	0.0	0.0	0.0	0.0	0.0	0.0	0.0	0.0	0.0	0.0	0.0
CGNL1	84952	symbol	H. sapiens	84952	H. sapiens	CGNL1	cingulin like 1	GO:0150105 protein localization to cell-cell junction;GO:0051497 negative regulation of stress fiber assembly;GO:0032232 negative regulation of actin filament bundle assembly		Predicted intracellular proteins; Disease related genes	Cell Junctions (Supported); Additional: Nuclear bodies				0.0	0.0	0.0	0.0	0.0	0.0	0.0	0.0	0.0	1.0	0.0	0.0	0.0	0.0	0.0	0.0	1.0	0.0	0.0	0.0
LOC285043	285043	Gene_ID	H. sapiens	285043	H. sapiens	LINC01936	long intergenic non-protein coding RNA 1936								0.0	0.0	0.0	0.0	0.0	0.0	0.0	0.0	0.0	0.0	0.0	0.0	0.0	0.0	0.0	0.0	0.0	0.0	0.0	0.0
MYHAS	100128560	symbol	H. sapiens	100128560	H. sapiens	MYHAS	myosin heavy chain gene cluster antisense RNA								0.0	0.0	0.0	0.0	0.0	0.0	0.0	0.0	0.0	0.0	0.0	0.0	0.0	0.0	0.0	0.0	0.0	0.0	0.0	0.0
SLC25A43	203427	symbol	H. sapiens	203427	H. sapiens	SLC25A43	solute carrier family 25 member 43	GO:0055085 transmembrane transport;GO:0006810 transport;GO:0051234 establishment of localization		Transporters:Electrochemical Potential-driven transporters	Cytosol (Approved)				0.0	0.0	0.0	0.0	0.0	0.0	0.0	0.0	0.0	0.0	0.0	0.0	0.0	0.0	0.0	0.0	0.0	0.0	0.0	0.0
TMEM50A	23585	symbol	H. sapiens	23585	H. sapiens	TMEM50A	transmembrane protein 50A	GO:0032511 late endosome to vacuole transport via multivesicular body sorting pathway;GO:0045324 late endosome to vacuole transport;GO:0032509 endosome transport via multivesicular body sorting pathway		Transporters	Plasma membrane (Approved); Additional: Actin filaments;Cytosol			(M5908)HALLMARK ANDROGEN RESPONSE	0.0	0.0	0.0	0.0	0.0	0.0	0.0	0.0	0.0	0.0	0.0	0.0	0.0	0.0	0.0	0.0	0.0	0.0	0.0	0.0
FGF9	2254	symbol	H. sapiens	2254	H. sapiens	FGF9	fibroblast growth factor 9	GO:1900240 negative regulation of phenotypic switching;GO:1905916 negative regulation of cell differentiation involved in phenotypic switching;GO:1905931 negative regulation of vascular associated smooth muscle cell differentiation involved in phenotypic switching		Cancer-related genes:Candidate cancer biomarkers; Predicted secreted proteins; Human disease related genes:Congenital malformations:Congenital malformations of the musculoskeletal system; Disease related genes; RAS pathway related proteins; Predicted intracellular proteins			(M276)PID FGF PATHWAY; (M5883)NABA SECRETED FACTORS; (M5885)NABA MATRISOME ASSOCIATED	(M5953)HALLMARK KRAS SIGNALING UP	0.0	0.0	0.0	1.0	1.0	1.0	0.0	1.0	0.0	0.0	0.0	0.0	1.0	0.0	1.0	0.0	0.0	0.0	0.0	1.0
PLEKHA7	144100	symbol	H. sapiens	144100	H. sapiens	PLEKHA7	pleckstrin homology domain containing A7	GO:0045218 zonula adherens maintenance;GO:0034334 adherens junction maintenance;GO:0044331 cell-cell adhesion mediated by cadherin		Predicted intracellular proteins	Cell Junctions;Nucleoplasm (Enhanced); Additional: Cytosol		(M232)PID ECADHERIN STABILIZATION PATHWAY		0.0	0.0	0.0	0.0	0.0	0.0	0.0	0.0	0.0	0.0	0.0	0.0	0.0	0.0	0.0	0.0	0.0	0.0	0.0	0.0
GNB5	10681	symbol	H. sapiens	10681	H. sapiens	GNB5	G protein subunit beta 5	GO:0036367 light adaption;GO:0009646 response to absence of light;GO:0071485 cellular response to absence of light		Predicted intracellular proteins; RAS pathway related proteins; Human disease related genes:Other diseases:Mental and behavioural disorders; Disease related genes	Nuclear speckles (Approved); Additional: Centrosome;Rods & Rings		(M117)PID CONE PATHWAY; (M204)PID RHODOPSIN PATHWAY; (M99)PID TXA2PATHWAY		1.0	0.0	0.0	1.0	0.0	1.0	1.0	0.0	0.0	0.0	0.0	0.0	0.0	0.0	0.0	1.0	0.0	0.0	0.0	0.0
STMN2	11075	symbol	H. sapiens	11075	H. sapiens	STMN2	stathmin 2	GO:0031117 positive regulation of microtubule depolymerization;GO:0031115 negative regulation of microtubule polymerization;GO:0007019 microtubule depolymerization		Predicted intracellular proteins	Vesicles (Approved); Additional: Endoplasmic reticulum				0.0	0.0	0.0	0.0	0.0	0.0	0.0	0.0	0.0	0.0	0.0	0.0	1.0	0.0	0.0	0.0	1.0	0.0	0.0	0.0
LNX1	84708	symbol	H. sapiens	84708	H. sapiens	LNX1	ligand of numb-protein X 1	GO:0006511 ubiquitin-dependent protein catabolic process;GO:0019941 modification-dependent protein catabolic process;GO:0043632 modification-dependent macromolecule catabolic process		Enzymes; Predicted intracellular proteins; ENZYME proteins:Transferases	Cell Junctions (Supported); Additional: Cytosol		(M17)PID NOTCH PATHWAY		0.0	0.0	0.0	0.0	0.0	0.0	0.0	0.0	0.0	0.0	0.0	0.0	0.0	0.0	0.0	0.0	0.0	0.0	0.0	0.0
EHHADH	1962	symbol	H. sapiens	1962	H. sapiens	EHHADH	enoyl-CoA hydratase and 3-hydroxyacyl CoA dehydrogenase	GO:0033540 fatty acid beta-oxidation using acyl-CoA oxidase;GO:0006635 fatty acid beta-oxidation;GO:0019395 fatty acid oxidation		ENZYME proteins:Oxidoreductases; Human disease related genes:Congenital disorders of metabolism:Congenital disorders of amino acid metabolism; ENZYME proteins:Lyases; Disease related genes; Potential drug targets; Enzymes; ENZYME proteins:Isomerase; Predicted intracellular proteins		NADH		(M5949)HALLMARK PEROXISOME; (M5935)HALLMARK FATTY ACID METABOLISM	0.0	0.0	1.0	0.0	0.0	0.0	0.0	0.0	0.0	0.0	0.0	0.0	0.0	0.0	0.0	0.0	0.0	0.0	0.0	0.0
MOSPD2	158747	symbol	H. sapiens	158747	H. sapiens	MOSPD2	motile sperm domain containing 2	GO:0090026 positive regulation of monocyte chemotaxis;GO:0090023 positive regulation of neutrophil chemotaxis;GO:0071624 positive regulation of granulocyte chemotaxis		Predicted intracellular proteins	Endoplasmic reticulum (Supported)				0.0	0.0	0.0	0.0	0.0	0.0	0.0	0.0	0.0	0.0	0.0	0.0	0.0	0.0	1.0	0.0	0.0	1.0	0.0	0.0
GSAP	54103	symbol	H. sapiens	54103	H. sapiens	GSAP	gamma-secretase activating protein	GO:1902004 positive regulation of amyloid-beta formation;GO:1902993 positive regulation of amyloid precursor protein catabolic process;GO:1902003 regulation of amyloid-beta formation		Predicted intracellular proteins	Vesicles (Approved)				0.0	0.0	0.0	0.0	0.0	0.0	0.0	0.0	0.0	0.0	0.0	0.0	0.0	0.0	0.0	1.0	0.0	0.0	0.0	0.0
RPGRIP1L	23322	symbol	H. sapiens	23322	H. sapiens	RPGRIP1L	RPGRIP1 like	GO:0046548 retinal rod cell development;GO:0060221 retinal rod cell differentiation;GO:0021670 lateral ventricle development		Human disease related genes:Congenital malformations:Congenital malformations of the nervous system; Predicted intracellular proteins; Disease related genes; Human disease related genes:Congenital malformations:Congenital malformations of the urinary system	Cytosol;Plasma membrane (Approved)				0.0	0.0	0.0	0.0	0.0	0.0	0.0	0.0	0.0	0.0	0.0	1.0	0.0	0.0	0.0	0.0	0.0	0.0	0.0	1.0
CPNE8	144402	symbol	H. sapiens	144402	H. sapiens	CPNE8	copine 8	GO:0071277 cellular response to calcium ion;GO:0051592 response to calcium ion;GO:0071248 cellular response to metal ion		Predicted intracellular proteins					0.0	0.0	0.0	0.0	0.0	0.0	0.0	0.0	0.0	0.0	0.0	0.0	0.0	0.0	0.0	0.0	0.0	0.0	0.0	0.0
C2	717	symbol	H. sapiens	717	H. sapiens	C2	complement C2	GO:2000427 positive regulation of apoptotic cell clearance;GO:2000425 regulation of apoptotic cell clearance;GO:0097066 response to thyroid hormone		Human disease related genes:Immune system diseases:Primary immunodeficiency; Human disease related genes:Immune system diseases:Allergies and autoimmune diseases; ENZYME proteins:Hydrolases; Predicted secreted proteins; Human disease related genes:Nervous system diseases:Eye disease; Disease related genes; Potential drug targets; Enzymes; Predicted intracellular proteins; Peptidases:Serine-type p…				(M5946)HALLMARK COAGULATION; (M5921)HALLMARK COMPLEMENT; (M5950)HALLMARK ALLOGRAFT REJECTION	0.0	0.0	0.0	0.0	0.0	1.0	0.0	0.0	0.0	0.0	1.0	0.0	0.0	0.0	0.0	0.0	0.0	0.0	0.0	0.0
LOC730102	730102	Gene_ID	H. sapiens	730102	H. sapiens	CRYZL2P	crystallin zeta like 2, pseudogene								0.0	0.0	0.0	0.0	0.0	0.0	0.0	0.0	0.0	0.0	0.0	0.0	0.0	0.0	0.0	0.0	0.0	0.0	0.0	0.0
ACKR3	57007	symbol	H. sapiens	57007	H. sapiens	ACKR3	atypical chemokine receptor 3	GO:1905320 regulation of mesenchymal stem cell migration;GO:1905322 positive regulation of mesenchymal stem cell migration;GO:0021557 oculomotor nerve development		G-protein coupled receptors:GPCRs excl olfactory receptors; Cancer-related genes; G-protein coupled receptors:Chemokines and chemotactic factors receptors	Plasma membrane;Vesicles (Supported)			(M5890)HALLMARK TNFA SIGNALING VIA NFKB; (M5891)HALLMARK HYPOXIA	0.0	0.0	0.0	0.0	1.0	0.0	0.0	0.0	0.0	1.0	0.0	0.0	0.0	0.0	1.0	0.0	0.0	0.0	0.0	0.0
FOXL2NB	401089	symbol	H. sapiens	401089	H. sapiens	FOXL2NB	FOXL2 neighbor			Predicted intracellular proteins	Nucleoli fibrillar center (Enhanced)				0.0	0.0	0.0	0.0	0.0	0.0	0.0	0.0	0.0	0.0	0.0	0.0	0.0	0.0	0.0	0.0	0.0	0.0	0.0	0.0
LOC100049716	100049716	Gene_ID	H. sapiens	100049716	H. sapiens	NINJ2-AS1	NINJ2 antisense RNA 1								0.0	0.0	0.0	0.0	0.0	0.0	0.0	0.0	0.0	0.0	0.0	0.0	0.0	0.0	0.0	0.0	0.0	0.0	0.0	0.0
ADRA2A	150	symbol	H. sapiens	150	H. sapiens	ADRA2A	adrenoceptor alpha 2A	GO:0070473 negative regulation of uterine smooth muscle contraction;GO:0071881 adenylate cyclase-inhibiting adrenergic receptor signaling pathway;GO:0071882 phospholipase C-activating adrenergic receptor signaling pathway		G-protein coupled receptors:GPCRs excl olfactory receptors; Transporters; FDA approved drug targets:Small molecule drugs		Tramadol; Bethanidine; Ziprasidone; Cabergoline; Dihydroergotamine; Amitriptyline; Clozapine; Norepinephrine; Mirtazapine; Phenylpropanolamine; Loxapine; Pramipexole; Prochlorperazine; Dipivefrin; Prazosin; Chlorpromazine; Brimonidine; Haloperidol; Nortriptyline; Amoxapine; Lamotrigine; Clonidine; Lisuride; Guanabenz; Dexmedetomidine; Trazodone; Epinephrine; Phentolamine; Ergotamine; Tizanidine; …			1.0	0.0	1.0	0.0	0.0	0.0	1.0	0.0	1.0	0.0	1.0	0.0	0.0	0.0	1.0	1.0	1.0	0.0	1.0	0.0
ZHX3	23051	symbol	H. sapiens	23051	H. sapiens	ZHX3	zinc fingers and homeoboxes 3	GO:0045669 positive regulation of osteoblast differentiation;GO:0045667 regulation of osteoblast differentiation;GO:0045597 positive regulation of cell differentiation		Transcription factors:Helix-turn-helix domains; Predicted intracellular proteins	Nucleoplasm (Supported)				0.0	0.0	0.0	0.0	0.0	0.0	0.0	0.0	0.0	0.0	0.0	0.0	0.0	0.0	0.0	0.0	0.0	0.0	0.0	0.0
GPRC5B	51704	symbol	H. sapiens	51704	H. sapiens	GPRC5B	G protein-coupled receptor class C group 5 member B	GO:0060907 positive regulation of macrophage cytokine production;GO:0010935 regulation of macrophage cytokine production;GO:0061081 positive regulation of myeloid leukocyte cytokine production involved in immune response		G-protein coupled receptors:GPCRs excl olfactory receptors; G-protein coupled receptors:Family 3 (C) receptors; Predicted intracellular proteins	Vesicles (Supported); Additional: Nucleoli;Nucleoplasm			(M5953)HALLMARK KRAS SIGNALING UP	0.0	0.0	0.0	0.0	0.0	0.0	0.0	0.0	0.0	0.0	0.0	0.0	0.0	0.0	1.0	0.0	0.0	0.0	0.0	0.0
LEP	3952	symbol	H. sapiens	3952	H. sapiens	LEP	leptin	GO:0071298 cellular response to L-ascorbic acid;GO:1904651 positive regulation of fat cell apoptotic process;GO:2000486 negative regulation of glutamine transport		Candidate cardiovascular disease genes; Cancer-related genes:Candidate cancer biomarkers; Predicted secreted proteins; Human disease related genes:Endocrine and metabolic diseases:Other endocrine and metabolic diseases; Disease related genes			(M50)PID PTP1B PATHWAY; (M255)PID HIF1 TFPATHWAY; (M5883)NABA SECRETED FACTORS	(M5905)HALLMARK ADIPOGENESIS	1.0	0.0	0.0	0.0	1.0	1.0	0.0	0.0	0.0	0.0	1.0	0.0	0.0	0.0	0.0	0.0	0.0	0.0	1.0	1.0
MILR1	284021	symbol	H. sapiens	284021	H. sapiens	MILR1	mast cell immunoglobulin like receptor 1	GO:0033004 negative regulation of mast cell activation;GO:0002279 mast cell activation involved in immune response;GO:0043303 mast cell degranulation		Predicted intracellular proteins					0.0	0.0	0.0	0.0	0.0	0.0	0.0	0.0	0.0	0.0	1.0	0.0	0.0	0.0	0.0	0.0	0.0	0.0	0.0	0.0
LOC101927204	101927204	Gene_ID	H. sapiens	101927204	H. sapiens	FAM111A-DT	FAM111A divergent transcript								0.0	0.0	0.0	0.0	0.0	0.0	0.0	0.0	0.0	0.0	0.0	0.0	0.0	0.0	0.0	0.0	0.0	0.0	0.0	0.0
CD72	971	symbol	H. sapiens	971	H. sapiens	CD72	CD72 molecule	GO:0007155 cell adhesion;GO:0022610 biological adhesion;GO:0009987 cellular process		Predicted intracellular proteins; CD markers	Mitochondria;Nucleoplasm (Approved)		(M10)PID BCR 5PATHWAY		0.0	0.0	0.0	0.0	0.0	1.0	0.0	0.0	0.0	0.0	0.0	0.0	0.0	0.0	0.0	0.0	0.0	0.0	0.0	0.0
LIPC	3990	symbol	H. sapiens	3990	H. sapiens	LIPC	lipase C, hepatic type	GO:0034373 intermediate-density lipoprotein particle remodeling;GO:0034382 chylomicron remnant clearance;GO:0071830 triglyceride-rich lipoprotein particle clearance		ENZYME proteins:Hydrolases; Predicted secreted proteins; Human disease related genes:Congenital disorders of metabolism:Congenital disorders of lipid/glycolipid metabolism; Disease related genes; Potential drug targets; Enzymes					0.0	0.0	0.0	0.0	0.0	0.0	0.0	0.0	0.0	0.0	0.0	0.0	0.0	0.0	0.0	0.0	0.0	0.0	0.0	0.0
PQLC2L	152078	gene_synonym	H. sapiens	152078	H. sapiens	SLC66A1L	solute carrier family 66 member 1 like	GO:1903826 L-arginine transmembrane transport;GO:1902022 L-lysine transport;GO:1903401 L-lysine transmembrane transport							0.0	0.0	0.0	0.0	0.0	0.0	0.0	0.0	0.0	0.0	0.0	0.0	0.0	0.0	0.0	0.0	0.0	0.0	0.0	0.0
CFL2	1073	symbol	H. sapiens	1073	H. sapiens	CFL2	cofilin 2	GO:0030043 actin filament fragmentation;GO:0030042 actin filament depolymerization;GO:0030836 positive regulation of actin filament depolymerization		Predicted intracellular proteins; Human disease related genes:Musculoskeletal diseases:Muscular diseases; Disease related genes	Cytosol;Nucleoplasm (Approved); Additional: Plasma membrane		(M16801)SIG REGULATION OF THE ACTIN CYTOSKELETON BY RHO GTPASES; (M5193)SIG CHEMOTAXIS; (M220)PID CASPASE PATHWAY		0.0	0.0	0.0	0.0	0.0	1.0	0.0	0.0	1.0	0.0	0.0	0.0	0.0	0.0	0.0	0.0	1.0	0.0	0.0	0.0
RAC1	5879	symbol	H. sapiens	5879	H. sapiens	RAC1	Rac family small GTPase 1	GO:0032707 negative regulation of interleukin-23 production;GO:0010764 negative regulation of fibroblast migration;GO:0032667 regulation of interleukin-23 production		Cancer-related genes:Mutated cancer genes; Human disease related genes:Other diseases:Mental and behavioural disorders; Cancer-related genes:Candidate cancer biomarkers; ENZYME proteins:Hydrolases; Cancer-related genes:Mutational cancer driver genes; Disease related genes; Potential drug targets; Enzymes; RAS pathway related proteins; Predicted intracellular proteins	Cytosol;Nucleoplasm (Approved); Additional: Nucleoli	Azathioprine; Guanosine-5'-Diphosphate	(M120)PID ARF6 DOWNSTREAM PATHWAY; (M243)PID ARF 3PATHWAY; (M273)PID EPHA2 FWD PATHWAY	(M5923)HALLMARK PI3K AKT MTOR SIGNALING; (M5946)HALLMARK COAGULATION	1.0	0.0	0.0	1.0	0.0	1.0	1.0	1.0	1.0	1.0	1.0	1.0	0.0	1.0	1.0	0.0	1.0	1.0	0.0	0.0
NDRG2	57447	symbol	H. sapiens	57447	H. sapiens	NDRG2	NDRG family member 2	GO:0090361 regulation of platelet-derived growth factor production;GO:0021762 substantia nigra development;GO:0010574 regulation of vascular endothelial growth factor production		Predicted intracellular proteins	Centriolar satellite (Approved); Additional: Cytosol;Nucleoplasm		(M254)PID MYC REPRESS PATHWAY	(M5934)HALLMARK XENOBIOTIC METABOLISM	0.0	0.0	0.0	0.0	0.0	0.0	0.0	0.0	0.0	0.0	0.0	0.0	0.0	0.0	0.0	0.0	0.0	0.0	0.0	0.0
KCNA4	3739	symbol	H. sapiens	3739	H. sapiens	KCNA4	potassium voltage-gated channel subfamily A member 4	GO:0071805 potassium ion transmembrane transport;GO:0006813 potassium ion transport;GO:0051260 protein homooligomerization		FDA approved drug targets:Small molecule drugs; Human disease related genes:Congenital malformations:Congenital malformations of the nervous system; Voltage-gated ion channels:Voltage-Gated Potassium Channels; Disease related genes; Transporters:Transporter channels and pores		Arginineamide; Dalfampridine			1.0	0.0	0.0	0.0	0.0	0.0	0.0	0.0	0.0	0.0	0.0	0.0	0.0	0.0	0.0	0.0	0.0	0.0	0.0	0.0
PLEKHO2	80301	symbol	H. sapiens	80301	H. sapiens	PLEKHO2	pleckstrin homology domain containing O2	GO:0071888 macrophage apoptotic process;GO:0033028 myeloid cell apoptotic process;GO:0006925 inflammatory cell apoptotic process		Predicted intracellular proteins	Cytosol;Plasma membrane (Approved); Additional: Nucleoplasm				0.0	0.0	0.0	0.0	0.0	0.0	0.0	0.0	0.0	0.0	0.0	0.0	0.0	0.0	0.0	0.0	0.0	1.0	0.0	0.0
LINC00856	100132987	symbol	H. sapiens	100132987	H. sapiens	LINC00856	long intergenic non-protein coding RNA 856								0.0	0.0	0.0	0.0	0.0	0.0	0.0	0.0	0.0	0.0	0.0	0.0	0.0	0.0	0.0	0.0	0.0	0.0	0.0	0.0
10-Sep						None	None	None	None	None	None	None	None	None	nan	nan	nan	nan	nan	nan	nan	nan	nan	nan	nan	nan	nan	nan	nan	nan	nan	nan	nan	nan
PTGIS	5740	symbol	H. sapiens	5740	H. sapiens	PTGIS	prostaglandin I2 synthase	GO:1900119 positive regulation of execution phase of apoptosis;GO:0035360 positive regulation of peroxisome proliferator activated receptor signaling pathway;GO:0019371 cyclooxygenase pathway		FDA approved drug targets:Small molecule drugs; ENZYME proteins:Lyases; Disease related genes; Enzymes; ENZYME proteins:Isomerase	Endoplasmic reticulum (Approved)	Phenylbutazone; Epoprostenol; (5Z)-7-{(1R,4S,5R,6R)-6-[(1E)-1-Octen-1-yl]-2,3-diazabicyclo[2.2.1]hept-2-en-5-yl}-5-heptenoic acid		(M5909)HALLMARK MYOGENESIS	0.0	0.0	0.0	0.0	0.0	0.0	0.0	0.0	0.0	0.0	0.0	0.0	0.0	0.0	0.0	0.0	0.0	0.0	0.0	0.0
PAM	5066	symbol	H. sapiens	5066	H. sapiens	PAM	peptidylglycine alpha-amidating monooxygenase	GO:0018032 protein amidation;GO:0062112 fatty acid primary amide biosynthetic process;GO:0062126 fatty acid primary amide metabolic process		ENZYME proteins:Oxidoreductases; Predicted secreted proteins; ENZYME proteins:Lyases; Enzymes; Predicted intracellular proteins	Cytosol;Golgi apparatus (Approved)	Ascorbic acid; N-Alpha-Acetyl-3,5-Diiodotyrosylglycine; N-alpha-Acetyl-3,5-diiodotyrosyl-D-threonine		(M5910)HALLMARK PROTEIN SECRETION; (M5891)HALLMARK HYPOXIA; (M5937)HALLMARK GLYCOLYSIS	0.0	0.0	0.0	0.0	0.0	0.0	0.0	0.0	0.0	0.0	1.0	0.0	0.0	0.0	0.0	0.0	0.0	0.0	1.0	0.0
PPP1R21	129285	symbol	H. sapiens	129285	H. sapiens	PPP1R21	protein phosphatase 1 regulatory subunit 21			Predicted intracellular proteins; Disease related genes	Vesicles (Approved); Additional: Nucleoplasm				0.0	0.0	0.0	0.0	0.0	0.0	0.0	0.0	0.0	0.0	0.0	0.0	0.0	0.0	0.0	0.0	0.0	0.0	0.0	0.0
DCHS2	54798	symbol	H. sapiens	54798	H. sapiens	DCHS2	dachsous cadherin-related 2	GO:0072137 condensed mesenchymal cell proliferation;GO:0010463 mesenchymal cell proliferation;GO:0072006 nephron development			Plasma membrane;Vesicles (Approved)				0.0	0.0	0.0	0.0	0.0	0.0	0.0	0.0	0.0	0.0	0.0	0.0	0.0	0.0	0.0	0.0	0.0	0.0	0.0	0.0
IL22RA1	58985	symbol	H. sapiens	58985	H. sapiens	IL22RA1	interleukin 22 receptor subunit alpha 1	GO:0050829 defense response to Gram-negative bacterium;GO:0042742 defense response to bacterium;GO:0019221 cytokine-mediated signaling pathway							0.0	1.0	0.0	0.0	0.0	1.0	0.0	0.0	0.0	0.0	0.0	0.0	0.0	0.0	0.0	0.0	0.0	0.0	0.0	0.0
TAB3	257397	symbol	H. sapiens	257397	H. sapiens	TAB3	TGF-beta activated kinase 1 (MAP3K7) binding protein 3	GO:0010507 negative regulation of autophagy;GO:0043123 positive regulation of I-kappaB kinase/NF-kappaB signaling;GO:0043122 regulation of I-kappaB kinase/NF-kappaB signaling		Predicted intracellular proteins	Cytosol;Nuclear speckles (Approved)				0.0	1.0	0.0	0.0	0.0	1.0	0.0	0.0	0.0	0.0	0.0	0.0	0.0	0.0	0.0	0.0	0.0	0.0	0.0	0.0
MOXD1	26002	symbol	H. sapiens	26002	H. sapiens	MOXD1	monooxygenase DBH like 1	GO:0006589 octopamine biosynthetic process;GO:0046333 octopamine metabolic process;GO:0042439 ethanolamine-containing compound metabolic process		Predicted intracellular proteins	Cytosol (Approved)				0.0	0.0	1.0	0.0	0.0	0.0	0.0	0.0	0.0	0.0	0.0	0.0	0.0	0.0	0.0	0.0	0.0	0.0	0.0	0.0
PRLR	5618	symbol	H. sapiens	5618	H. sapiens	PRLR	prolactin receptor	GO:0038161 prolactin signaling pathway;GO:0042976 activation of Janus kinase activity;GO:0038165 oncostatin-M-mediated signaling pathway		Human disease related genes:Endocrine and metabolic diseases:Hypothalamus and pituitary gland diseases; FDA approved drug targets:Biotech drugs; Predicted intracellular proteins; Disease related genes		Somatotropin	(M13)PID ERBB4 PATHWAY; (M50)PID PTP1B PATHWAY	(M5907)HALLMARK ESTROGEN RESPONSE LATE	0.0	1.0	0.0	0.0	0.0	1.0	0.0	1.0	0.0	0.0	0.0	0.0	0.0	0.0	0.0	0.0	0.0	0.0	1.0	0.0
LPXN	9404	symbol	H. sapiens	9404	H. sapiens	LPXN	leupaxin	GO:0050859 negative regulation of B cell receptor signaling pathway;GO:0050855 regulation of B cell receptor signaling pathway;GO:0050858 negative regulation of antigen receptor-mediated signaling pathway		Predicted intracellular proteins	Focal adhesion sites (Supported); Additional: Cytosol;Nuclear speckles				0.0	0.0	0.0	0.0	0.0	0.0	0.0	1.0	0.0	0.0	0.0	0.0	1.0	0.0	0.0	0.0	0.0	0.0	0.0	0.0
INPP1	3628	symbol	H. sapiens	3628	H. sapiens	INPP1	inositol polyphosphate-1-phosphatase	GO:0046838 phosphorylated carbohydrate dephosphorylation;GO:0046855 inositol phosphate dephosphorylation;GO:0071545 inositol phosphate catabolic process		Enzymes; ENZYME proteins:Hydrolases; Predicted intracellular proteins	Centriolar satellite (Approved); Additional: Cytosol				0.0	0.0	1.0	0.0	0.0	0.0	0.0	0.0	0.0	0.0	0.0	0.0	0.0	0.0	0.0	0.0	0.0	0.0	0.0	0.0
RAET1G	353091	symbol	H. sapiens	353091	H. sapiens	RAET1G	retinoic acid early transcript 1G	GO:0002729 positive regulation of natural killer cell cytokine production;GO:0002727 regulation of natural killer cell cytokine production;GO:0042267 natural killer cell mediated cytotoxicity		Predicted secreted proteins	Plasma membrane;Vesicles (Supported)				0.0	0.0	0.0	0.0	0.0	0.0	0.0	0.0	0.0	0.0	0.0	0.0	0.0	0.0	1.0	0.0	0.0	0.0	0.0	0.0
FMOD	2331	symbol	H. sapiens	2331	H. sapiens	FMOD	fibromodulin	GO:0007181 transforming growth factor beta receptor complex assembly;GO:0030199 collagen fibril organization;GO:0007179 transforming growth factor beta receptor signaling pathway		Predicted secreted proteins; Predicted intracellular proteins			(M5882)NABA PROTEOGLYCANS; (M5884)NABA CORE MATRISOME; (M5889)NABA MATRISOME	(M5930)HALLMARK EPITHELIAL MESENCHYMAL TRANSITION	0.0	0.0	0.0	0.0	0.0	0.0	0.0	1.0	0.0	0.0	0.0	0.0	1.0	0.0	0.0	0.0	1.0	0.0	0.0	0.0
PARP4	143	symbol	H. sapiens	143	H. sapiens	PARP4	poly(ADP-ribose) polymerase family member 4	GO:0140289 protein mono-ADP-ribosylation;GO:0006471 protein ADP-ribosylation;GO:0051972 regulation of telomerase activity		Predicted intracellular proteins	Nucleoplasm (Supported); Additional: Cytosol				0.0	0.0	0.0	0.0	0.0	0.0	0.0	0.0	0.0	0.0	0.0	0.0	0.0	0.0	0.0	0.0	0.0	0.0	0.0	0.0
LOC653602	151354	Gene_ID	H. sapiens	151354	H. sapiens	LRATD1	LRAT domain containing 1	GO:0000902 cell morphogenesis;GO:0048870 cell motility;GO:0051674 localization of cell		Predicted intracellular proteins	Nucleoplasm (Approved)				0.0	0.0	0.0	0.0	0.0	0.0	0.0	0.0	0.0	0.0	0.0	0.0	0.0	0.0	0.0	0.0	0.0	0.0	0.0	0.0
DPP4	1803	symbol	H. sapiens	1803	H. sapiens	DPP4	dipeptidyl peptidase 4	GO:0120116 glucagon processing;GO:0036343 psychomotor behavior;GO:0010716 negative regulation of extracellular matrix disassembly		FDA approved drug targets:Small molecule drugs; CD markers; ENZYME proteins:Hydrolases; Predicted secreted proteins; Enzymes; Predicted intracellular proteins; Peptidases:Serine-type peptidases		Atorvastatin; Sitagliptin; 2-Amino-3-Methyl-1-Pyrrolidin-1-Yl-Butan-1-One; 5-(Aminomethyl)-6-(2,4-Dichlorophenyl)-2-(3,5-Dimethoxyphenyl)Pyrimidin-4-Amine; (2s)-Pyrrolidin-2-Ylmethylamine; 4-Iodo-L-phenylalanine; Diisopropylphosphono Group; 1-(1-phenylcyclopentyl)methylamine; (S)-2-[(R)-3-amino-4-(2-fluorophenyl)butyryl]-1,2,3,4-tetrahydroisoquinoline-3-carboxamide; Vildagliptin; PSN9301; AMG-222…		(M5957)HALLMARK PANCREAS BETA CELLS; (M5946)HALLMARK COAGULATION; (M5921)HALLMARK COMPLEMENT	0.0	0.0	0.0	0.0	0.0	0.0	0.0	0.0	0.0	0.0	0.0	0.0	0.0	0.0	1.0	0.0	0.0	0.0	0.0	0.0
APLP2	334	symbol	H. sapiens	334	H. sapiens	APLP2	amyloid beta precursor like protein 2	GO:0010951 negative regulation of endopeptidase activity;GO:0010466 negative regulation of peptidase activity;GO:0007409 axonogenesis		Predicted intracellular proteins	Vesicles (Approved)	Zinc; Zinc acetate; Zinc chloride; Zinc sulfate, unspecified form		(M5905)HALLMARK ADIPOGENESIS	0.0	0.0	0.0	0.0	0.0	0.0	1.0	0.0	0.0	0.0	0.0	0.0	0.0	0.0	0.0	1.0	0.0	0.0	0.0	0.0
CMYA5	202333	symbol	H. sapiens	202333	H. sapiens	CMYA5	cardiomyopathy associated 5			Predicted intracellular proteins	Cytosol;Nuclear speckles (Approved); Additional: Plasma membrane;Vesicles				0.0	0.0	0.0	0.0	0.0	0.0	0.0	0.0	0.0	0.0	0.0	0.0	0.0	0.0	0.0	0.0	0.0	0.0	0.0	0.0
TSHZ2	128553	symbol	H. sapiens	128553	H. sapiens	TSHZ2	teashirt zinc finger homeobox 2	GO:0006357 regulation of transcription by RNA polymerase II;GO:0006355 regulation of transcription, DNA-templated;GO:1903506 regulation of nucleic acid-templated transcription		Transcription factors:Helix-turn-helix domains; Predicted intracellular proteins	Golgi apparatus (Approved); Additional: Nucleoplasm				0.0	0.0	0.0	0.0	0.0	0.0	0.0	0.0	0.0	0.0	0.0	0.0	0.0	0.0	0.0	0.0	0.0	0.0	0.0	0.0
CERKL	375298	symbol	H. sapiens	375298	H. sapiens	CERKL	ceramide kinase like	GO:0046834 lipid phosphorylation;GO:0030148 sphingolipid biosynthetic process;GO:0046467 membrane lipid biosynthetic process		Human disease related genes:Nervous system diseases:Eye disease; Predicted intracellular proteins; Disease related genes	Cytosol;Nucleoplasm (Approved)				0.0	0.0	0.0	0.0	0.0	0.0	0.0	0.0	0.0	0.0	0.0	0.0	0.0	0.0	0.0	0.0	0.0	0.0	0.0	0.0
PITPNA	5306	symbol	H. sapiens	5306	H. sapiens	PITPNA	phosphatidylinositol transfer protein alpha	GO:0120009 intermembrane lipid transfer;GO:0015914 phospholipid transport;GO:0015748 organophosphate ester transport		Predicted intracellular proteins	Cytosol (Approved); Additional: Vesicles	1,2-diacyl-sn-glycero-3-phosphoinositol; (Z,Z)-4-Hydroxy-N,N,N-Trimethyl-10-Oxo-7-[(1-Oxo-9-Octadecenyl)Oxy]-3,5,9-Trioxa-4-Phosphaheptacos-18-En-1-Aminium-4-Oxide	(M108)PID NETRIN PATHWAY		0.0	1.0	0.0	0.0	0.0	1.0	0.0	0.0	0.0	0.0	0.0	0.0	0.0	0.0	0.0	0.0	0.0	0.0	0.0	0.0
LOC101928370	101928370	Gene_ID	H. sapiens	101928370	H. sapiens	S1PR1-DT	S1PR1 divergent transcript								0.0	0.0	0.0	0.0	0.0	0.0	0.0	0.0	0.0	0.0	0.0	0.0	0.0	0.0	0.0	0.0	0.0	0.0	0.0	0.0
BCAS1	8537	symbol	H. sapiens	8537	H. sapiens	BCAS1	brain enriched myelin associated protein 1	GO:0042552 myelination;GO:0007272 ensheathment of neurons;GO:0008366 axon ensheathment		Predicted intracellular proteins	Vesicles (Approved)				0.0	0.0	0.0	0.0	0.0	0.0	0.0	0.0	0.0	0.0	0.0	0.0	0.0	0.0	0.0	0.0	0.0	0.0	0.0	0.0
RGN	9104	symbol	H. sapiens	9104	H. sapiens	RGN	regucalcin	GO:1903011 negative regulation of bone development;GO:1903611 negative regulation of calcium-dependent ATPase activity;GO:1903627 regulation of dUTP diphosphatase activity		Enzymes; ENZYME proteins:Hydrolases; Predicted intracellular proteins	Cytosol (Approved)	Calcium citrate; Calcium Phosphate; Calcium phosphate dihydrate		(M5946)HALLMARK COAGULATION	1.0	0.0	0.0	0.0	0.0	0.0	0.0	0.0	0.0	0.0	0.0	0.0	0.0	0.0	0.0	1.0	0.0	0.0	0.0	0.0
ECM1	1893	symbol	H. sapiens	1893	H. sapiens	ECM1	extracellular matrix protein 1	GO:0030502 negative regulation of bone mineralization;GO:0002063 chondrocyte development;GO:0003416 endochondral bone growth		Predicted secreted proteins; Human disease related genes:Congenital disorders of metabolism:Congenital disorders of lipid/glycolipid metabolism; Disease related genes	Cytosol (Approved); Additional: Nucleoplasm		(M3008)NABA ECM GLYCOPROTEINS; (M5884)NABA CORE MATRISOME; (M5889)NABA MATRISOME	(M5947)HALLMARK IL2 STAT5 SIGNALING; (M5930)HALLMARK EPITHELIAL MESENCHYMAL TRANSITION	0.0	0.0	0.0	0.0	1.0	0.0	1.0	0.0	0.0	0.0	0.0	0.0	0.0	0.0	1.0	1.0	0.0	0.0	0.0	1.0
CTSB	1508	symbol	H. sapiens	1508	H. sapiens	CTSB	cathepsin B	GO:0006590 thyroid hormone generation;GO:0097067 cellular response to thyroid hormone stimulus;GO:0042403 thyroid hormone metabolic process		Candidate cardiovascular disease genes; Cancer-related genes:Candidate cancer biomarkers; Human disease related genes:Digestive system diseases:Pancreas diseases; ENZYME proteins:Hydrolases; Predicted secreted proteins; Peptidases:Cysteine-type peptidases; Disease related genes; Potential drug targets; Enzymes; Predicted intracellular proteins	Vesicles (Supported); Additional: Nucleoli	2-Aminoethanimidic Acid; 3-Amino-4-Oxybenzyl-2-Butanone; 3-Methylphenylalanine; N-(3-Propylcarbamoyloxirane-2-Carbonyl)-Isoleucyl-Proline; 2-Pyridinethiol; Diphenylacetic acid; N-[1-Hydroxycarboxyethyl-Carbonyl]Leucylamino-2-Methyl-Butane; N-{[(2S,3S)-3-(Ethoxycarbonyl)-2-oxiranyl]carbonyl}-L-threonyl-L-isoleucine; N-{[(2S,3S)-3-(ETHOXYCARBONYL)OXIRAN-2-YL]CARBONYL}-L-ISOLEUCINE; BENZYL N-({(2S,3…	(M3468)NABA ECM REGULATORS; (M5885)NABA MATRISOME ASSOCIATED; (M5889)NABA MATRISOME	(M5946)HALLMARK COAGULATION; (M5921)HALLMARK COMPLEMENT; (M5945)HALLMARK HEME METABOLISM	0.0	0.0	0.0	0.0	0.0	1.0	0.0	0.0	0.0	0.0	0.0	0.0	0.0	0.0	0.0	1.0	0.0	1.0	1.0	0.0
SPATA18	132671	symbol	H. sapiens	132671	H. sapiens	SPATA18	spermatogenesis associated 18	GO:0035695 mitophagy by induced vacuole formation;GO:0035694 mitochondrial protein catabolic process;GO:0000422 autophagy of mitochondrion		Predicted intracellular proteins	Mitochondria (Supported)		(M256)PID TAP63 PATHWAY		0.0	0.0	0.0	0.0	0.0	0.0	0.0	0.0	0.0	0.0	0.0	0.0	0.0	0.0	0.0	0.0	0.0	0.0	0.0	0.0
CCDC80	151887	symbol	H. sapiens	151887	H. sapiens	CCDC80	coiled-coil domain containing 80	GO:0010811 positive regulation of cell-substrate adhesion;GO:0010810 regulation of cell-substrate adhesion;GO:0030198 extracellular matrix organization		Predicted secreted proteins; Predicted intracellular proteins					0.0	0.0	0.0	0.0	0.0	0.0	0.0	0.0	0.0	0.0	0.0	0.0	0.0	0.0	0.0	0.0	0.0	0.0	0.0	0.0
ZC3H7A	29066	symbol	H. sapiens	29066	H. sapiens	ZC3H7A	zinc finger CCCH-type containing 7A	GO:0035196 production of miRNAs involved in gene silencing by miRNA;GO:0031050 dsRNA processing;GO:0070918 production of small RNA involved in gene silencing by RNA		Predicted intracellular proteins	Cytosol (Supported)				0.0	0.0	0.0	0.0	0.0	0.0	0.0	0.0	0.0	0.0	0.0	0.0	0.0	0.0	0.0	0.0	0.0	0.0	0.0	0.0
HOXC8	3224	symbol	H. sapiens	3224	H. sapiens	HOXC8	homeobox C8	GO:0009952 anterior/posterior pattern specification;GO:0048705 skeletal system morphogenesis;GO:0003002 regionalization		Transcription factors:Helix-turn-helix domains; Predicted intracellular proteins	Nucleoplasm (Supported); Additional: Microtubules				0.0	0.0	0.0	0.0	0.0	0.0	0.0	0.0	0.0	0.0	0.0	0.0	0.0	0.0	0.0	0.0	0.0	0.0	0.0	1.0
FKBP1A	2280	symbol	H. sapiens	2280	H. sapiens	FKBP1A	FKBP prolyl isomerase 1A	GO:0007183 SMAD protein complex assembly;GO:0022417 protein maturation by protein folding;GO:0060347 heart trabecula formation		FDA approved drug targets:Small molecule drugs; Transporters:Accessory Factors Involved in Transport; Enzymes; ENZYME proteins:Isomerase; Predicted intracellular proteins		Pimecrolimus; Tacrolimus; Sirolimus; (3R)-4-(p-toluenesulfonyl)-1,4-thiazane-3-carboxylicacid-L-phenylalanine ethyl ester; {3-[3-(3,4-Dimethoxy-Phenyl)-1-(1-{1-[2-(3,4,5-Trimethoxy-Phenyl)-Butyryl]-Piperidin-2yl}-Vinyloxy)-Propyl]-Phenoxy}-Acetic Acid; Gpi-1046; Methyl Methylsulfinylmethyl Sulfide; FKB-001; Heptyl glucoside; L-709,587; (3r)-4-(P-Toluenesulfonyl)-1,4-Thiazane-3-Carboxylicacid-L-Le…	(M203)PID ALK2 PATHWAY; (M185)PID ALK1 PATHWAY; (M235)PID TCR CALCIUM PATHWAY	(M5896)HALLMARK TGF BETA SIGNALING	1.0	0.0	0.0	1.0	0.0	0.0	0.0	1.0	0.0	0.0	0.0	0.0	1.0	0.0	0.0	0.0	1.0	0.0	0.0	0.0
MAPK14	1432	symbol	H. sapiens	1432	H. sapiens	MAPK14	mitogen-activated protein kinase 14	GO:0099179 regulation of synaptic membrane adhesion;GO:0090400 stress-induced premature senescence;GO:0070391 response to lipoteichoic acid	CMGC Ser/Thr protein kinase family	Cancer-related genes:Candidate cancer biomarkers; Kinases:CMGC Ser/Thr protein kinases; Enzymes; Predicted intracellular proteins; ENZYME proteins:Transferases	Nuclear speckles (Supported); Additional: Cytosol	Dasatinib; 4-[5-[2-(1-phenyl-ethylamino)-pyrimidin-4-yl]-1-methyl-4-(3-trifluoromethylphenyl)-1H-imidazol-2-yl]-piperidine; N-[(3Z)-5-Tert-butyl-2-phenyl-1,2-dihydro-3H-pyrazol-3-ylidene]-N'-(4-chlorophenyl)urea; 1-(2,6-Dichlorophenyl)-5-(2,4-Difluorophenyl)-7-Piperidin-4-Yl-3,4-Dihydroquinolin-2(1h)-One; Inhibitor of P38 Kinase; 6((S)-3-Benzylpiperazin-1-Yl)-3-(Naphthalen-2-Yl)-4-(Pyridin-4-Yl)P…	(M26)PID NFKAPPAB ATYPICAL PATHWAY; (M199)PID P38 MK2 PATHWAY; (M268)PID S1P S1P2 PATHWAY	(M5942)HALLMARK UV RESPONSE DN; (M5901)HALLMARK G2M CHECKPOINT; (M5915)HALLMARK APICAL JUNCTION	1.0	1.0	0.0	1.0	1.0	1.0	1.0	1.0	1.0	1.0	0.0	0.0	1.0	0.0	0.0	0.0	0.0	1.0	0.0	1.0
TRPV3	162514	symbol	H. sapiens	162514	H. sapiens	TRPV3	transient receptor potential cation channel subfamily V member 3	GO:0042636 negative regulation of hair cycle;GO:0098703 calcium ion import across plasma membrane;GO:1902656 calcium ion import into cytosol		Human disease related genes:Congenital malformations:Congenital malformations of skin; FDA approved drug targets:Small molecule drugs; Disease related genes; Transporters:Transporter channels and pores	Plasma membrane (Approved); Additional: Centrosome;Cytosol	Levomenthol; Camphor; Cannabidiol; Eugenol; (S)-camphor; Medical Cannabis; Nabiximols			1.0	0.0	0.0	0.0	0.0	1.0	0.0	0.0	0.0	0.0	0.0	0.0	0.0	0.0	0.0	0.0	0.0	0.0	0.0	0.0
DSTYK	25778	symbol	H. sapiens	25778	H. sapiens	DSTYK	dual serine/threonine and tyrosine protein kinase	GO:0045743 positive regulation of fibroblast growth factor receptor signaling pathway;GO:0040036 regulation of fibroblast growth factor receptor signaling pathway;GO:0044344 cellular response to fibroblast growth factor stimulus	Other	Human disease related genes:Nervous system diseases:Other nervous and sensory system diseases; Human disease related genes:Congenital malformations:Congenital malformations of the urinary system; Disease related genes; Potential drug targets; Enzymes; Kinases; Predicted intracellular proteins; ENZYME proteins:Transferases					0.0	0.0	0.0	0.0	0.0	0.0	0.0	0.0	0.0	0.0	0.0	0.0	1.0	0.0	0.0	0.0	0.0	0.0	0.0	0.0
NAAA	27163	symbol	H. sapiens	27163	H. sapiens	NAAA	N-acylethanolamine acid amidase	GO:0070291 N-acylethanolamine metabolic process;GO:0042439 ethanolamine-containing compound metabolic process;GO:0070292 N-acylphosphatidylethanolamine metabolic process		Enzymes; ENZYME proteins:Hydrolases; Predicted intracellular proteins		Cannabidiol; Medical Cannabis; Nabiximols			0.0	0.0	0.0	0.0	0.0	0.0	0.0	0.0	0.0	0.0	0.0	0.0	0.0	0.0	0.0	0.0	0.0	0.0	0.0	0.0
FOXO1	2308	symbol	H. sapiens	2308	H. sapiens	FOXO1	forkhead box O1	GO:0071455 cellular response to hyperoxia;GO:0010616 negative regulation of cardiac muscle adaptation;GO:1903243 negative regulation of cardiac muscle hypertrophy in response to stress		Transcription factors:Helix-turn-helix domains; Cancer-related genes:Candidate cancer biomarkers; Human disease related genes:Cancers:Cancers of soft tissues and bone; Human disease related genes:Cancers:Cancers of haematopoietic and lymphoid tissues; Disease related genes; Predicted intracellular proteins	Cytosol;Nucleoplasm (Supported)		(M32)PID HDAC CLASSIII PATHWAY; (M249)PID PI3KCI AKT PATHWAY; (M183)PID IL6 7 PATHWAY	(M5957)HALLMARK PANCREAS BETA CELLS	0.0	1.0	0.0	1.0	1.0	1.0	0.0	1.0	0.0	1.0	0.0	0.0	0.0	0.0	0.0	0.0	0.0	0.0	0.0	0.0
OSBPL3	26031	symbol	H. sapiens	26031	H. sapiens	OSBPL3	oxysterol binding protein like 3	GO:0006699 bile acid biosynthetic process;GO:0008206 bile acid metabolic process;GO:0015918 sterol transport		Predicted intracellular proteins	Cytosol (Supported); Additional: Nucleoli				0.0	0.0	0.0	0.0	0.0	0.0	0.0	0.0	0.0	0.0	0.0	0.0	0.0	0.0	0.0	0.0	0.0	0.0	0.0	0.0
PREX2	80243	symbol	H. sapiens	80243	H. sapiens	PREX2	phosphatidylinositol-3,4,5-trisphosphate dependent Rac exchange factor 2	GO:0014065 phosphatidylinositol 3-kinase signaling;GO:0048813 dendrite morphogenesis;GO:0048015 phosphatidylinositol-mediated signaling		Predicted intracellular proteins; Cancer-related genes	Endoplasmic reticulum (Approved)		(M241)PID RAC1 REG PATHWAY		0.0	0.0	0.0	0.0	0.0	0.0	0.0	0.0	0.0	0.0	0.0	0.0	0.0	0.0	0.0	0.0	0.0	0.0	0.0	0.0
ENPP4	22875	symbol	H. sapiens	22875	H. sapiens	ENPP4	ectonucleotide pyrophosphatase/phosphodiesterase 4	GO:0046130 purine ribonucleoside catabolic process;GO:0006152 purine nucleoside catabolic process;GO:0042454 ribonucleoside catabolic process		Enzymes; ENZYME proteins:Hydrolases					0.0	0.0	0.0	0.0	0.0	0.0	0.0	0.0	0.0	0.0	0.0	0.0	0.0	0.0	0.0	0.0	0.0	1.0	0.0	0.0
MX2	4600	symbol	H. sapiens	4600	H. sapiens	MX2	MX dynamin like GTPase 2	GO:0035455 response to interferon-alpha;GO:0046822 regulation of nucleocytoplasmic transport;GO:0051028 mRNA transport		Transporters:Transporter channels and pores; Predicted intracellular proteins				(M5913)HALLMARK INTERFERON GAMMA RESPONSE	0.0	1.0	0.0	0.0	0.0	1.0	0.0	0.0	0.0	0.0	0.0	0.0	0.0	0.0	0.0	0.0	0.0	0.0	0.0	0.0
MTURN	222166	symbol	H. sapiens	222166	H. sapiens	MTURN	maturin, neural progenitor differentiation regulator homolog	GO:0045654 positive regulation of megakaryocyte differentiation;GO:0045652 regulation of megakaryocyte differentiation;GO:0032088 negative regulation of NF-kappaB transcription factor activity		Predicted intracellular proteins	Cytosol (Approved)				0.0	0.0	0.0	0.0	0.0	0.0	0.0	0.0	0.0	0.0	0.0	0.0	0.0	0.0	0.0	0.0	0.0	0.0	0.0	0.0
NEK11	79858	symbol	H. sapiens	79858	H. sapiens	NEK11	NIMA related kinase 11	GO:0031573 mitotic intra-S DNA damage checkpoint signaling;GO:0016572 histone phosphorylation;GO:0044773 mitotic DNA damage checkpoint signaling	NEK Ser/Thr protein kinase family	Enzymes; Predicted intracellular proteins; ENZYME proteins:Transferases; Kinases:NEK Ser/Thr protein kinases	Nucleoplasm (Supported)	Dabrafenib; Fostamatinib			0.0	0.0	0.0	0.0	0.0	0.0	0.0	0.0	0.0	0.0	0.0	0.0	0.0	0.0	0.0	0.0	0.0	0.0	0.0	0.0
SLC2A9	56606	symbol	H. sapiens	56606	H. sapiens	SLC2A9	solute carrier family 2 member 9	GO:0015747 urate transport;GO:0046415 urate metabolic process;GO:1904659 glucose transmembrane transport		Human disease related genes:Urinary system diseases:Kidney diseases; Transporters:Electrochemical Potential-driven transporters; Disease related genes; Potential drug targets					0.0	0.0	0.0	0.0	0.0	0.0	0.0	0.0	0.0	0.0	0.0	0.0	0.0	0.0	0.0	0.0	0.0	0.0	0.0	0.0
SGCB	6443	symbol	H. sapiens	6443	H. sapiens	SGCB	sarcoglycan beta	GO:0097084 vascular associated smooth muscle cell development;GO:0035886 vascular associated smooth muscle cell differentiation;GO:0051145 smooth muscle cell differentiation		Human disease related genes:Musculoskeletal diseases:Muscular diseases; Disease related genes	Cytosol (Approved)			(M5930)HALLMARK EPITHELIAL MESENCHYMAL TRANSITION	0.0	0.0	0.0	0.0	1.0	0.0	0.0	0.0	0.0	0.0	0.0	0.0	0.0	1.0	0.0	0.0	0.0	0.0	0.0	0.0
TMEM30B	161291	symbol	H. sapiens	161291	H. sapiens	TMEM30B	transmembrane protein 30B	GO:0140331 aminophospholipid translocation;GO:0015917 aminophospholipid transport;GO:0070863 positive regulation of protein exit from endoplasmic reticulum		Transporters:Accessory Factors Involved in Transport					0.0	0.0	0.0	0.0	0.0	0.0	0.0	0.0	0.0	0.0	0.0	0.0	0.0	0.0	0.0	0.0	0.0	0.0	0.0	0.0
GAS6-AS2	100506394	gene_synonym	H. sapiens	100506394	H. sapiens	GAS6-DT	GAS6 divergent transcript								0.0	0.0	0.0	0.0	0.0	0.0	0.0	0.0	0.0	0.0	0.0	0.0	0.0	0.0	0.0	0.0	0.0	0.0	0.0	0.0
KCNB1	3745	symbol	H. sapiens	3745	H. sapiens	KCNB1	potassium voltage-gated channel subfamily B member 1	GO:0010701 positive regulation of norepinephrine secretion;GO:2000671 regulation of motor neuron apoptotic process;GO:1900454 positive regulation of long-term synaptic depression		Human disease related genes:Nervous system diseases:Epilepsy; FDA approved drug targets:Small molecule drugs; Voltage-gated ion channels:Voltage-Gated Potassium Channels; Disease related genes; Transporters:Transporter channels and pores; Predicted intracellular proteins		Dalfampridine			1.0	0.0	0.0	0.0	0.0	0.0	0.0	0.0	0.0	0.0	1.0	0.0	0.0	0.0	0.0	0.0	0.0	0.0	0.0	0.0
ZEB1	6935	symbol	H. sapiens	6935	H. sapiens	ZEB1	zinc finger E-box binding homeobox 1	GO:0048752 semicircular canal morphogenesis;GO:0060872 semicircular canal development;GO:0045602 negative regulation of endothelial cell differentiation		Human disease related genes:Nervous system diseases:Eye disease; Predicted intracellular proteins; Disease related genes; Transcription factors:Helix-turn-helix domains	Nucleoplasm (Supported); Additional: Nucleoli		(M71)PID ILK PATHWAY	(M5921)HALLMARK COMPLEMENT	0.0	1.0	0.0	0.0	1.0	1.0	0.0	0.0	0.0	0.0	0.0	0.0	1.0	0.0	0.0	0.0	0.0	0.0	1.0	1.0
GALNT12	79695	symbol	H. sapiens	79695	H. sapiens	GALNT12	polypeptide N-acetylgalactosaminyltransferase 12	GO:0016266 O-glycan processing;GO:0006493 protein O-linked glycosylation;GO:0006486 protein glycosylation		Human disease related genes:Cancers:Cancers of the digestive system; Disease related genes; Potential drug targets; Enzymes; Predicted intracellular proteins; ENZYME proteins:Transferases	Plasma membrane (Approved); Additional: Cell Junctions;Nucleoplasm				0.0	0.0	0.0	0.0	0.0	0.0	0.0	0.0	0.0	0.0	0.0	0.0	0.0	0.0	0.0	0.0	0.0	0.0	0.0	0.0
TDRD7	23424	symbol	H. sapiens	23424	H. sapiens	TDRD7	tudor domain containing 7	GO:0007314 oocyte anterior/posterior axis specification;GO:0007315 pole plasm assembly;GO:0008358 maternal determination of anterior/posterior axis, embryo		Human disease related genes:Nervous system diseases:Eye disease; Predicted intracellular proteins; Disease related genes	Cytoplasmic bodies (Supported); Additional: Nucleoplasm		(M242)PID AURORA A PATHWAY	(M5911)HALLMARK INTERFERON ALPHA RESPONSE; (M5913)HALLMARK INTERFERON GAMMA RESPONSE	0.0	0.0	0.0	0.0	1.0	0.0	0.0	0.0	0.0	0.0	0.0	0.0	0.0	0.0	0.0	0.0	0.0	0.0	0.0	1.0
ANXA7	310	symbol	H. sapiens	310	H. sapiens	ANXA7	annexin A7	GO:0006914 autophagy;GO:0061919 process utilizing autophagic mechanism;GO:0030855 epithelial cell differentiation		Predicted intracellular proteins; Cancer-related genes:Candidate cancer biomarkers	Nucleoplasm (Uncertain); Additional: Cytosol		(M5880)NABA ECM AFFILIATED; (M5885)NABA MATRISOME ASSOCIATED; (M5889)NABA MATRISOME		0.0	0.0	0.0	0.0	0.0	0.0	0.0	0.0	0.0	0.0	0.0	0.0	0.0	0.0	0.0	0.0	0.0	0.0	0.0	0.0
GSTM5	2949	symbol	H. sapiens	2949	H. sapiens	GSTM5	glutathione S-transferase mu 5	GO:0006749 glutathione metabolic process;GO:0006575 cellular modified amino acid metabolic process;GO:0006790 sulfur compound metabolic process		Enzymes; Predicted intracellular proteins; ENZYME proteins:Transferases	Cytosol (Uncertain); Additional: Cytokinetic bridge	Glutathione			0.0	0.0	0.0	0.0	0.0	1.0	0.0	0.0	0.0	0.0	0.0	0.0	0.0	0.0	0.0	0.0	0.0	0.0	0.0	0.0
PLA2G4C	8605	symbol	H. sapiens	8605	H. sapiens	PLA2G4C	phospholipase A2 group IVC	GO:0006663 platelet activating factor biosynthetic process;GO:0046469 platelet activating factor metabolic process;GO:0036152 phosphatidylethanolamine acyl-chain remodeling		Enzymes; ENZYME proteins:Hydrolases; RAS pathway related proteins; Predicted intracellular proteins	Cytosol (Approved)				0.0	0.0	0.0	1.0	0.0	1.0	0.0	0.0	1.0	0.0	0.0	0.0	0.0	0.0	0.0	0.0	0.0	0.0	1.0	0.0
LAMA4	3910	symbol	H. sapiens	3910	H. sapiens	LAMA4	laminin subunit alpha 4	GO:0120163 negative regulation of cold-induced thermogenesis;GO:0045995 regulation of embryonic development;GO:0120161 regulation of cold-induced thermogenesis		Predicted intracellular proteins; Predicted secreted proteins; Human disease related genes:Cardiovascular diseases:Cardiac diseases; Disease related genes	Cytosol;Plasma membrane (Approved)		(M5887)NABA BASEMENT MEMBRANES; (M176)PID FOXM1 PATHWAY; (M53)PID INTEGRIN3 PATHWAY	(M5905)HALLMARK ADIPOGENESIS	0.0	0.0	0.0	1.0	0.0	1.0	0.0	0.0	0.0	0.0	0.0	0.0	0.0	0.0	0.0	0.0	0.0	0.0	0.0	0.0
OAS2	4939	symbol	H. sapiens	4939	H. sapiens	OAS2	2'-5'-oligoadenylate synthetase 2	GO:1903487 regulation of lactation;GO:0070106 interleukin-27-mediated signaling pathway;GO:0060700 regulation of ribonuclease activity		Enzymes; Predicted intracellular proteins; ENZYME proteins:Transferases	Centrosome (Approved)			(M5913)HALLMARK INTERFERON GAMMA RESPONSE	0.0	1.0	0.0	0.0	0.0	1.0	0.0	0.0	0.0	0.0	1.0	0.0	0.0	0.0	0.0	0.0	0.0	0.0	0.0	0.0
NECAP2	55707	symbol	H. sapiens	55707	H. sapiens	NECAP2	NECAP endocytosis associated 2	GO:0006897 endocytosis;GO:0015031 protein transport;GO:0045184 establishment of protein localization		Predicted intracellular proteins	Endoplasmic reticulum (Approved)				0.0	0.0	0.0	0.0	0.0	0.0	0.0	0.0	0.0	0.0	0.0	0.0	0.0	0.0	0.0	0.0	0.0	0.0	0.0	0.0
C8orf46	254778	gene_synonym	H. sapiens	254778	H. sapiens	VXN	vexin	GO:0030182 neuron differentiation;GO:0048699 generation of neurons;GO:0022008 neurogenesis		Predicted intracellular proteins	Nuclear speckles (Approved)				0.0	0.0	0.0	0.0	0.0	0.0	0.0	0.0	0.0	0.0	0.0	0.0	0.0	0.0	0.0	0.0	0.0	0.0	0.0	0.0
PITPNM3	83394	symbol	H. sapiens	83394	H. sapiens	PITPNM3	PITPNM family member 3	GO:0120009 intermembrane lipid transfer;GO:0015914 phospholipid transport;GO:0006661 phosphatidylinositol biosynthetic process		Human disease related genes:Nervous system diseases:Eye disease; Predicted intracellular proteins; Disease related genes	Plasma membrane (Approved)				0.0	0.0	0.0	0.0	0.0	0.0	0.0	0.0	0.0	0.0	0.0	0.0	0.0	0.0	0.0	0.0	0.0	0.0	0.0	0.0
PXYLP1	92370	symbol	H. sapiens	92370	H. sapiens	PXYLP1	2-phosphoxylose phosphatase 1	GO:0010909 positive regulation of heparan sulfate proteoglycan biosynthetic process;GO:0010908 regulation of heparan sulfate proteoglycan biosynthetic process;GO:1902730 positive regulation of proteoglycan biosynthetic process		Predicted intracellular proteins					0.0	0.0	0.0	0.0	0.0	0.0	0.0	0.0	0.0	0.0	0.0	0.0	0.0	0.0	0.0	0.0	0.0	0.0	0.0	0.0
ZNF137P	7696	symbol	H. sapiens	7696	H. sapiens	ZNF137P	zinc finger protein 137, pseudogene								0.0	0.0	0.0	0.0	0.0	0.0	0.0	0.0	0.0	0.0	0.0	0.0	0.0	0.0	0.0	0.0	0.0	0.0	0.0	0.0
ABCB4	5244	symbol	H. sapiens	5244	H. sapiens	ABCB4	ATP binding cassette subfamily B member 4	GO:1901557 response to fenofibrate;GO:0061092 positive regulation of phospholipid translocation;GO:1903412 response to bile acid		Human disease related genes:Digestive system diseases:Liver diseases; ENZYME proteins; Disease related genes; Potential drug targets; Enzymes; Transporters:Primary Active Transporters; Predicted intracellular proteins	Actin filaments;Nucleoplasm;Plasma membrane (Approved); Additional: Focal adhesion sites			(M5949)HALLMARK PEROXISOME	0.0	0.0	0.0	0.0	0.0	0.0	0.0	0.0	0.0	0.0	0.0	0.0	0.0	0.0	0.0	0.0	0.0	0.0	0.0	0.0
PTPN12	5782	symbol	H. sapiens	5782	H. sapiens	PTPN12	protein tyrosine phosphatase non-receptor type 12	GO:2000587 negative regulation of platelet-derived growth factor receptor-beta signaling pathway;GO:2000586 regulation of platelet-derived growth factor receptor-beta signaling pathway;GO:0010642 negative regulation of platelet-derived growth factor receptor signaling pathway		Enzymes; ENZYME proteins:Hydrolases; Predicted intracellular proteins	Cytosol;Plasma membrane (Approved)	Tiludronic acid			0.0	1.0	0.0	1.0	0.0	0.0	0.0	0.0	0.0	0.0	0.0	0.0	1.0	0.0	0.0	0.0	0.0	0.0	0.0	0.0
FAM134B	54463	gene_synonym	H. sapiens	54463	H. sapiens	RETREG1	reticulophagy regulator 1	GO:0061709 reticulophagy;GO:0000423 mitophagy;GO:0050872 white fat cell differentiation		Potential drug targets; Transporters; Disease related genes; Human disease related genes:Nervous system diseases:Other nervous and sensory system diseases	Endoplasmic reticulum (Supported)			(M5906)HALLMARK ESTROGEN RESPONSE EARLY	0.0	0.0	0.0	0.0	0.0	0.0	0.0	0.0	0.0	0.0	0.0	0.0	0.0	0.0	0.0	0.0	0.0	0.0	0.0	0.0
EXOC1	55763	symbol	H. sapiens	55763	H. sapiens	EXOC1	exocyst complex component 1	GO:0006893 Golgi to plasma membrane transport;GO:0048015 phosphatidylinositol-mediated signaling;GO:0048017 inositol lipid-mediated signaling		Transporters:Transporter channels and pores; Predicted intracellular proteins	Plasma membrane (Approved); Additional: Cytosol;Microtubules		(M16)PID INSULIN PATHWAY; (M67)PID ARF6 TRAFFICKING PATHWAY		0.0	0.0	0.0	0.0	0.0	0.0	0.0	0.0	0.0	0.0	1.0	0.0	0.0	0.0	0.0	0.0	0.0	0.0	0.0	0.0
CNKSR2	22866	symbol	H. sapiens	22866	H. sapiens	CNKSR2	connector enhancer of kinase suppressor of Ras 2	GO:0099173 postsynapse organization;GO:0050808 synapse organization;GO:0034330 cell junction organization		Predicted intracellular proteins; Human disease related genes:Other diseases:Mental and behavioural disorders; Disease related genes	Golgi apparatus;Plasma membrane (Approved)				0.0	0.0	0.0	1.0	0.0	0.0	0.0	0.0	0.0	0.0	0.0	0.0	0.0	0.0	0.0	0.0	0.0	0.0	0.0	0.0
LINC01443	400644	symbol	H. sapiens	400644	H. sapiens	LINC01443	long intergenic non-protein coding RNA 1443								0.0	0.0	0.0	0.0	0.0	0.0	0.0	0.0	0.0	0.0	0.0	0.0	0.0	0.0	0.0	0.0	0.0	0.0	0.0	0.0
AGO4	192670	symbol	H. sapiens	192670	H. sapiens	AGO4	argonaute RISC component 4	GO:0035280 miRNA loading onto RISC involved in gene silencing by miRNA;GO:0010501 RNA secondary structure unwinding;GO:0070922 small RNA loading onto RISC		Predicted intracellular proteins	Cytoplasmic bodies (Supported); Additional: Cytosol			(M5898)HALLMARK DNA REPAIR	0.0	0.0	0.0	1.0	0.0	0.0	0.0	0.0	0.0	0.0	0.0	0.0	0.0	0.0	0.0	0.0	0.0	0.0	0.0	0.0
HADHA	3030	symbol	H. sapiens	3030	H. sapiens	HADHA	hydroxyacyl-CoA dehydrogenase trifunctional multienzyme complex subunit alpha	GO:0035965 cardiolipin acyl-chain remodeling;GO:0032048 cardiolipin metabolic process;GO:0046471 phosphatidylglycerol metabolic process		ENZYME proteins:Oxidoreductases; Human disease related genes:Congenital disorders of metabolism:Congenital disorders of lipid/glycolipid metabolism; ENZYME proteins:Lyases; Disease related genes; Potential drug targets; Enzymes; Predicted intracellular proteins; Human disease related genes:Congenital disorders of metabolism:Mitochondrial diseases	Mitochondria (Enhanced)	NADH		(M5936)HALLMARK OXIDATIVE PHOSPHORYLATION	0.0	0.0	1.0	0.0	0.0	0.0	0.0	0.0	0.0	0.0	0.0	0.0	0.0	0.0	0.0	0.0	0.0	0.0	0.0	0.0
COLGALT2	23127	symbol	H. sapiens	23127	H. sapiens	COLGALT2	collagen beta(1-O)galactosyltransferase 2	GO:0030199 collagen fibril organization;GO:0030198 extracellular matrix organization;GO:0043062 extracellular structure organization		Enzymes; Predicted intracellular proteins; ENZYME proteins:Transferases	Nucleoplasm (Approved); Additional: Vesicles				0.0	0.0	0.0	0.0	0.0	0.0	0.0	0.0	0.0	0.0	0.0	0.0	0.0	0.0	0.0	0.0	1.0	0.0	0.0	0.0
ACSL5	51703	symbol	H. sapiens	51703	H. sapiens	ACSL5	acyl-CoA synthetase long chain family member 5	GO:0010747 positive regulation of long-chain fatty acid import across plasma membrane;GO:0140214 positive regulation of long-chain fatty acid import into cell;GO:0010746 regulation of long-chain fatty acid import across plasma membrane		Enzymes; ENZYME proteins:Ligase	Mitochondria (Supported); Additional: Nucleoplasm			(M5949)HALLMARK PEROXISOME; (M5948)HALLMARK BILE ACID METABOLISM; (M5935)HALLMARK FATTY ACID METABOLISM	1.0	0.0	0.0	0.0	0.0	0.0	0.0	0.0	0.0	0.0	0.0	0.0	0.0	0.0	0.0	0.0	0.0	0.0	0.0	0.0
NIPAL2	79815	symbol	H. sapiens	79815	H. sapiens	NIPAL2	NIPA like domain containing 2	GO:1903830 magnesium ion transmembrane transport;GO:0015693 magnesium ion transport;GO:0098662 inorganic cation transmembrane transport							0.0	0.0	0.0	0.0	0.0	0.0	0.0	0.0	0.0	0.0	0.0	0.0	0.0	0.0	0.0	0.0	0.0	0.0	0.0	0.0
CDKL1	8814	symbol	H. sapiens	8814	H. sapiens	CDKL1	cyclin dependent kinase like 1	GO:1902017 regulation of cilium assembly;GO:0120032 regulation of plasma membrane bounded cell projection assembly;GO:0060491 regulation of cell projection assembly	CMGC Ser/Thr protein kinase family	Enzymes; Kinases:CMGC Ser/Thr protein kinases; Predicted intracellular proteins; ENZYME proteins:Transferases	Nucleoplasm (Enhanced); Additional: Vesicles	Fostamatinib			0.0	0.0	0.0	0.0	0.0	0.0	0.0	0.0	0.0	0.0	0.0	0.0	0.0	0.0	0.0	0.0	0.0	0.0	0.0	0.0
PSG5	5673	symbol	H. sapiens	5673	H. sapiens	PSG5	pregnancy specific beta-1-glycoprotein 5	GO:0007565 female pregnancy;GO:0044706 multi-multicellular organism process;GO:0044703 multi-organism reproductive process		Predicted secreted proteins		Alitretinoin			0.0	0.0	0.0	0.0	0.0	0.0	1.0	0.0	0.0	0.0	0.0	0.0	0.0	0.0	0.0	0.0	0.0	0.0	1.0	0.0
CD68	968	symbol	H. sapiens	968	H. sapiens	CD68	CD68 molecule	GO:0002605 negative regulation of dendritic cell antigen processing and presentation;GO:0002578 negative regulation of antigen processing and presentation;GO:0002604 regulation of dendritic cell antigen processing and presentation		Predicted intracellular proteins; CD markers	Golgi apparatus;Vesicles (Supported)				0.0	0.0	0.0	0.0	0.0	0.0	0.0	0.0	0.0	0.0	0.0	0.0	0.0	0.0	0.0	0.0	0.0	1.0	0.0	0.0
CBX7	23492	symbol	H. sapiens	23492	H. sapiens	CBX7	chromobox 7	GO:0032968 positive regulation of transcription elongation from RNA polymerase II promoter;GO:0032786 positive regulation of DNA-templated transcription, elongation;GO:0034243 regulation of transcription elongation from RNA polymerase II promoter		Predicted intracellular proteins	Nucleoplasm (Supported); Additional: Cytosol				0.0	0.0	0.0	0.0	0.0	0.0	0.0	0.0	0.0	0.0	0.0	0.0	0.0	0.0	0.0	0.0	0.0	0.0	0.0	0.0
PCNXL4	64430	gene_synonym	H. sapiens	64430	H. sapiens	PCNX4	pecanex 4			Predicted intracellular proteins	Cytosol (Approved)				0.0	0.0	0.0	0.0	0.0	0.0	0.0	0.0	0.0	0.0	0.0	0.0	0.0	0.0	0.0	0.0	0.0	0.0	0.0	0.0
WNK1	65125	symbol	H. sapiens	65125	H. sapiens	WNK1	WNK lysine deficient protein kinase 1	GO:0033633 negative regulation of cell-cell adhesion mediated by integrin;GO:0038116 chemokine (C-C motif) ligand 21 signaling pathway;GO:0097022 lymphocyte migration into lymph node	Other	Human disease related genes:Nervous system diseases:Other nervous and sensory system diseases; Kinases; Disease related genes; Potential drug targets; Enzymes; Human disease related genes:Urinary system diseases:Kidney diseases; Predicted intracellular proteins; ENZYME proteins:Transferases	Cytosol (Supported)				1.0	0.0	0.0	0.0	0.0	1.0	0.0	0.0	0.0	0.0	1.0	0.0	0.0	0.0	1.0	0.0	0.0	0.0	1.0	0.0
ZADH2	284273	symbol	H. sapiens	284273	H. sapiens	ZADH2	zinc binding alcohol dehydrogenase domain containing 2	GO:0006692 prostanoid metabolic process;GO:0006693 prostaglandin metabolic process;GO:0045599 negative regulation of fat cell differentiation		Enzymes; Predicted intracellular proteins; ENZYME proteins:Oxidoreductases	Vesicles (Approved); Additional: Golgi apparatus;Nucleoplasm				0.0	0.0	0.0	0.0	0.0	0.0	0.0	0.0	0.0	0.0	0.0	0.0	0.0	0.0	0.0	0.0	0.0	0.0	0.0	0.0
KIAA1324L	222223	gene_synonym	H. sapiens	222223	H. sapiens	ELAPOR2	endosome-lysosome associated apoptosis and autophagy regulator family member 2	GO:0045684 positive regulation of epidermis development;GO:0030513 positive regulation of BMP signaling pathway;GO:0045682 regulation of epidermis development		Predicted intracellular proteins	Endoplasmic reticulum (Approved)				0.0	0.0	0.0	0.0	0.0	0.0	0.0	0.0	0.0	0.0	0.0	0.0	0.0	0.0	0.0	0.0	0.0	0.0	0.0	0.0
NFASC	23114	symbol	H. sapiens	23114	H. sapiens	NFASC	neurofascin	GO:0019226 transmission of nerve impulse;GO:0007422 peripheral nervous system development;GO:0042552 myelination		Predicted intracellular proteins; Human disease related genes:Other diseases:Mental and behavioural disorders; Disease related genes				(M5915)HALLMARK APICAL JUNCTION	0.0	0.0	0.0	0.0	0.0	0.0	0.0	0.0	0.0	0.0	0.0	0.0	0.0	0.0	0.0	0.0	0.0	1.0	0.0	0.0
IL16	3603	symbol	H. sapiens	3603	H. sapiens	IL16	interleukin 16	GO:0032730 positive regulation of interleukin-1 alpha production;GO:0032650 regulation of interleukin-1 alpha production;GO:0050930 induction of positive chemotaxis		Human disease related genes:Immune system diseases:Allergies and autoimmune diseases; Cancer-related genes:Candidate cancer biomarkers; Predicted secreted proteins; Human disease related genes:Skin diseases:Skin and soft tissue diseases; Predicted intracellular proteins	Nuclear speckles (Supported); Additional: Cytosol;Plasma membrane		(M5883)NABA SECRETED FACTORS; (M5885)NABA MATRISOME ASSOCIATED; (M5889)NABA MATRISOME	(M5950)HALLMARK ALLOGRAFT REJECTION	1.0	1.0	0.0	0.0	0.0	0.0	0.0	0.0	0.0	0.0	0.0	0.0	0.0	0.0	1.0	0.0	0.0	0.0	0.0	0.0
VPS35	55737	symbol	H. sapiens	55737	H. sapiens	VPS35	VPS35 retromer complex component	GO:0032460 negative regulation of protein oligomerization;GO:0032463 negative regulation of protein homooligomerization;GO:0090326 positive regulation of locomotion involved in locomotory behavior		Transporters; Disease related genes; Potential drug targets; Human disease related genes:Nervous system diseases:Neurodegenerative diseases; Predicted intracellular proteins	Endosomes;Lysosomes (Supported)				1.0	0.0	0.0	0.0	0.0	0.0	0.0	0.0	0.0	0.0	1.0	0.0	0.0	0.0	1.0	0.0	0.0	0.0	0.0	0.0
GGH	8836	symbol	H. sapiens	8836	H. sapiens	GGH	gamma-glutamyl hydrolase	GO:0046900 tetrahydrofolylpolyglutamate metabolic process;GO:0006760 folic acid-containing compound metabolic process;GO:0042558 pteridine-containing compound metabolic process		Enzymes; ENZYME proteins:Hydrolases; Predicted intracellular proteins; Peptidases:Cysteine-type peptidases				(M5941)HALLMARK UV RESPONSE UP	0.0	0.0	0.0	0.0	0.0	0.0	0.0	0.0	0.0	0.0	0.0	0.0	0.0	0.0	0.0	0.0	0.0	1.0	0.0	0.0
PARP3	10039	symbol	H. sapiens	10039	H. sapiens	PARP3	poly(ADP-ribose) polymerase family member 3	GO:1905662 negative regulation of telomerase RNA reverse transcriptase activity;GO:0030592 DNA ADP-ribosylation;GO:1905661 regulation of telomerase RNA reverse transcriptase activity		FDA approved drug targets:Small molecule drugs; Predicted intracellular proteins	Nuclear bodies;Nucleoplasm (Supported)	2-methyl-3,5,7,8-tetrahydro-4H-thiopyrano[4,3-d]pyrimidin-4-one; 4-[3-(1,4-diazepan-1-ylcarbonyl)-4-fluorobenzyl]phthalazin-1(2H)-one; N~2~,N~2~-DIMETHYL-N~1~-(6-OXO-5,6-DIHYDROPHENANTHRIDIN-2-YL)GLYCINAMIDE; Olaparib; Rucaparib			0.0	0.0	0.0	0.0	0.0	0.0	0.0	0.0	0.0	0.0	0.0	0.0	0.0	0.0	0.0	0.0	0.0	0.0	0.0	0.0
CDADC1	81602	symbol	H. sapiens	81602	H. sapiens	CDADC1	cytidine and dCMP deaminase domain containing 1	GO:0070383 DNA cytosine deamination;GO:0006216 cytidine catabolic process;GO:0009972 cytidine deamination		Enzymes; ENZYME proteins:Hydrolases; Predicted intracellular proteins	Nucleoplasm (Approved)			(M5953)HALLMARK KRAS SIGNALING UP	0.0	0.0	0.0	0.0	0.0	0.0	0.0	0.0	0.0	0.0	0.0	0.0	0.0	0.0	0.0	0.0	0.0	0.0	0.0	0.0
CCDC125	202243	symbol	H. sapiens	202243	H. sapiens	CCDC125	coiled-coil domain containing 125	GO:0035024 negative regulation of Rho protein signal transduction;GO:0046580 negative regulation of Ras protein signal transduction;GO:0051058 negative regulation of small GTPase mediated signal transduction		Predicted intracellular proteins	Intermediate filaments;Nuclear membrane (Uncertain); Additional: Nucleoplasm				0.0	0.0	0.0	0.0	0.0	0.0	0.0	0.0	0.0	0.0	0.0	0.0	0.0	0.0	0.0	1.0	0.0	0.0	0.0	0.0
SERPINB1	1992	symbol	H. sapiens	1992	H. sapiens	SERPINB1	serpin family B member 1	GO:0044342 type B pancreatic cell proliferation;GO:0032691 negative regulation of interleukin-1 beta production;GO:0032692 negative regulation of interleukin-1 production		Predicted secreted proteins; Predicted intracellular proteins	Cytoplasmic bodies (Supported)		(M3468)NABA ECM REGULATORS; (M5885)NABA MATRISOME ASSOCIATED; (M5889)NABA MATRISOME		0.0	0.0	0.0	0.0	0.0	0.0	0.0	0.0	0.0	0.0	0.0	0.0	0.0	0.0	0.0	1.0	0.0	1.0	0.0	0.0
NLRP1	22861	symbol	H. sapiens	22861	H. sapiens	NLRP1	NLR family pyrin domain containing 1	GO:1904784 NLRP1 inflammasome complex assembly;GO:0140632 inflammasome complex assembly;GO:0097264 self proteolysis		Human disease related genes:Skin diseases:Skin and soft tissue diseases; Predicted intracellular proteins; Disease related genes	Cytosol;Nucleoplasm (Supported)		(M267)PID ANTHRAX PATHWAY		0.0	0.0	0.0	0.0	0.0	1.0	0.0	0.0	0.0	0.0	0.0	0.0	0.0	0.0	1.0	1.0	0.0	0.0	0.0	0.0
CAPN3	825	symbol	H. sapiens	825	H. sapiens	CAPN3	calpain 3	GO:1990092 calcium-dependent self proteolysis;GO:0014718 positive regulation of satellite cell activation involved in skeletal muscle regeneration;GO:0014717 regulation of satellite cell activation involved in skeletal muscle regeneration		ENZYME proteins:Hydrolases; Human disease related genes:Musculoskeletal diseases:Muscular diseases; Peptidases:Cysteine-type peptidases; Disease related genes; Potential drug targets; Enzymes; Predicted intracellular proteins		L-aminocarnityl-succinyl-leucyl-argininal-diethylacetal		(M5947)HALLMARK IL2 STAT5 SIGNALING	1.0	0.0	0.0	1.0	0.0	0.0	0.0	0.0	0.0	1.0	0.0	0.0	0.0	0.0	0.0	1.0	1.0	0.0	1.0	0.0
FBLN5	10516	symbol	H. sapiens	10516	H. sapiens	FBLN5	fibulin 5	GO:2000121 regulation of removal of superoxide radicals;GO:0048251 elastic fiber assembly;GO:0034394 protein localization to cell surface		Human disease related genes:Congenital malformations:Congenital malformations of skin; Human disease related genes:Nervous system diseases:Eye disease; Predicted secreted proteins; Disease related genes	Plasma membrane (Uncertain)		(M3008)NABA ECM GLYCOPROTEINS; (M5884)NABA CORE MATRISOME; (M5889)NABA MATRISOME	(M5942)HALLMARK UV RESPONSE DN; (M5930)HALLMARK EPITHELIAL MESENCHYMAL TRANSITION	0.0	0.0	0.0	0.0	0.0	0.0	0.0	0.0	0.0	0.0	0.0	0.0	0.0	0.0	0.0	0.0	1.0	0.0	0.0	0.0
BBS10	79738	symbol	H. sapiens	79738	H. sapiens	BBS10	Bardet-Biedl syndrome 10	GO:0051131 chaperone-mediated protein complex assembly;GO:0045494 photoreceptor cell maintenance;GO:1905515 non-motile cilium assembly		Predicted intracellular proteins; Disease related genes; Human disease related genes:Congenital disorders of metabolism:Other congenital disorders of metabolism					0.0	0.0	0.0	0.0	0.0	0.0	0.0	0.0	0.0	0.0	0.0	1.0	0.0	0.0	0.0	0.0	0.0	0.0	0.0	0.0
S1PR1	1901	symbol	H. sapiens	1901	H. sapiens	S1PR1	sphingosine-1-phosphate receptor 1	GO:0003245 cardiac muscle tissue growth involved in heart morphogenesis;GO:0003241 growth involved in heart morphogenesis;GO:0001955 blood vessel maturation		Transporters; FDA approved drug targets:Small molecule drugs; G-protein coupled receptors:Lysolipids receptors; CD markers; Cancer-related genes:Candidate cancer biomarkers; FDA approved drug targets:Biotech drugs; G-protein coupled receptors:GPCRs excl olfactory receptors	Vesicles (Supported)	Fingolimod; Asfotase alfa; Siponimod; Ozanimod	(M103)PID S1P S1P1 PATHWAY; (M155)PID S1P META PATHWAY; (M55)PID S1P S1P3 PATHWAY		0.0	1.0	0.0	1.0	1.0	1.0	0.0	0.0	0.0	1.0	0.0	1.0	0.0	0.0	1.0	1.0	1.0	0.0	0.0	0.0
CNTN3	5067	symbol	H. sapiens	5067	H. sapiens	CNTN3	contactin 3	GO:0007155 cell adhesion;GO:0022610 biological adhesion;GO:0009987 cellular process		Predicted intracellular proteins					0.0	0.0	0.0	0.0	0.0	0.0	0.0	0.0	0.0	0.0	0.0	0.0	0.0	0.0	0.0	0.0	0.0	0.0	0.0	0.0
ERICH2	285141	symbol	H. sapiens	285141	H. sapiens	ERICH2	glutamate rich 2			Predicted intracellular proteins	Nucleoli fibrillar center (Approved); Additional: Vesicles				0.0	0.0	0.0	0.0	0.0	0.0	0.0	0.0	0.0	0.0	0.0	0.0	0.0	0.0	0.0	0.0	0.0	0.0	0.0	0.0
USP54	159195	symbol	H. sapiens	159195	H. sapiens	USP54	ubiquitin specific peptidase 54	GO:0016579 protein deubiquitination;GO:0070646 protein modification by small protein removal;GO:0070647 protein modification by small protein conjugation or removal		Enzymes; Predicted intracellular proteins; Peptidases:Cysteine-type peptidases	Mitochondria (Approved)				0.0	0.0	0.0	0.0	0.0	0.0	0.0	0.0	0.0	0.0	0.0	0.0	0.0	0.0	0.0	0.0	0.0	0.0	0.0	0.0
TRIM25	7706	symbol	H. sapiens	7706	H. sapiens	TRIM25	tripartite motif containing 25	GO:0044790 suppression of viral release by host;GO:0046597 negative regulation of viral entry into host cell;GO:1903901 negative regulation of viral life cycle		ENZYME proteins:Ligase; Cancer-related genes:Candidate cancer biomarkers; Enzymes; Predicted intracellular proteins; ENZYME proteins:Transferases	Cytosol;Nucleoplasm (Approved); Additional: Nuclear bodies			(M5911)HALLMARK INTERFERON ALPHA RESPONSE; (M5913)HALLMARK INTERFERON GAMMA RESPONSE	0.0	1.0	0.0	0.0	0.0	1.0	0.0	0.0	0.0	0.0	0.0	0.0	0.0	0.0	0.0	0.0	0.0	0.0	0.0	0.0
CEP162	22832	symbol	H. sapiens	22832	H. sapiens	CEP162	centrosomal protein 162	GO:0060271 cilium assembly;GO:0044782 cilium organization;GO:0120031 plasma membrane bounded cell projection assembly		Predicted intracellular proteins	Centriolar satellite;Cytosol;Nucleoplasm (Approved)				0.0	0.0	0.0	0.0	0.0	0.0	0.0	0.0	0.0	0.0	0.0	1.0	0.0	0.0	0.0	0.0	0.0	0.0	0.0	0.0
CACNA2D4	93589	symbol	H. sapiens	93589	H. sapiens	CACNA2D4	calcium voltage-gated channel auxiliary subunit alpha2delta 4	GO:0050908 detection of light stimulus involved in visual perception;GO:0050962 detection of light stimulus involved in sensory perception;GO:0009584 detection of visible light		FDA approved drug targets:Small molecule drugs; Transporters:Accessory Factors Involved in Transport; Human disease related genes:Nervous system diseases:Eye disease; Disease related genes; Predicted intracellular proteins					1.0	0.0	0.0	0.0	0.0	1.0	0.0	0.0	0.0	0.0	0.0	0.0	0.0	1.0	0.0	0.0	0.0	0.0	0.0	0.0
YWHAB	7529	symbol	H. sapiens	7529	H. sapiens	YWHAB	tyrosine 3-monooxygenase/tryptophan 5-monooxygenase activation protein beta	GO:0051220 cytoplasmic sequestering of protein;GO:0035308 negative regulation of protein dephosphorylation;GO:0035305 negative regulation of dephosphorylation		Predicted intracellular proteins; Cancer-related genes:Candidate cancer biomarkers	Cytosol (Supported)	Copper; Phenethyl Isothiocyanate	(M199)PID P38 MK2 PATHWAY; (M247)PID INSULIN GLUCOSE PATHWAY; (M30)PID HDAC CLASSII PATHWAY	(M5923)HALLMARK PI3K AKT MTOR SIGNALING	0.0	0.0	0.0	1.0	0.0	1.0	0.0	0.0	0.0	0.0	0.0	0.0	0.0	0.0	0.0	0.0	0.0	0.0	0.0	0.0
C1QTNF3	114899	symbol	H. sapiens	114899	H. sapiens	C1QTNF3	C1q and TNF related 3	GO:0070165 positive regulation of adiponectin secretion;GO:0071638 negative regulation of monocyte chemotactic protein-1 production;GO:0070163 regulation of adiponectin secretion		Predicted secreted proteins	Golgi apparatus (Approved)		(M5880)NABA ECM AFFILIATED; (M5885)NABA MATRISOME ASSOCIATED; (M5889)NABA MATRISOME		0.0	0.0	0.0	0.0	0.0	0.0	0.0	0.0	0.0	0.0	1.0	0.0	0.0	0.0	0.0	0.0	0.0	0.0	0.0	0.0
VAMP3	9341	symbol	H. sapiens	9341	H. sapiens	VAMP3	vesicle associated membrane protein 3	GO:0001921 positive regulation of receptor recycling;GO:0035493 SNARE complex assembly;GO:0001919 regulation of receptor recycling		Transporters:Transporter channels and pores; Cancer-related genes:Candidate cancer biomarkers			(M67)PID ARF6 TRAFFICKING PATHWAY	(M5910)HALLMARK PROTEIN SECRETION	1.0	0.0	0.0	0.0	0.0	0.0	0.0	0.0	0.0	0.0	1.0	0.0	0.0	0.0	0.0	0.0	0.0	0.0	0.0	0.0
RHOU	58480	symbol	H. sapiens	58480	H. sapiens	RHOU	ras homolog family member U	GO:0032488 Cdc42 protein signal transduction;GO:0016601 Rac protein signal transduction;GO:1903955 positive regulation of protein targeting to mitochondrion		Predicted intracellular proteins			(M5493)WNT SIGNALING		0.0	1.0	0.0	0.0	0.0	0.0	0.0	0.0	1.0	0.0	0.0	1.0	0.0	0.0	0.0	0.0	1.0	0.0	0.0	0.0
MAPK9	5601	symbol	H. sapiens	5601	H. sapiens	MAPK9	mitogen-activated protein kinase 9	GO:0061833 protein localization to tricellular tight junction;GO:1901483 regulation of transcription factor catabolic process;GO:1901485 positive regulation of transcription factor catabolic process	CMGC Ser/Thr protein kinase family	Kinases:CMGC Ser/Thr protein kinases; Enzymes; RAS pathway related proteins; Predicted intracellular proteins; ENZYME proteins:Transferases	Cytosol;Plasma membrane (Approved); Additional: Nuclear speckles	N-{3-[5-(1H-1,2,4-triazol-3-yl)-1H-indazol-3-yl]phenyl}furan-2-carboxamide; Fostamatinib	(M45)PID CD40 PATHWAY; (M193)PID NEPHRIN NEPH1 PATHWAY; (M23)PID WNT NONCANONICAL PATHWAY	(M5923)HALLMARK PI3K AKT MTOR SIGNALING	0.0	1.0	0.0	1.0	0.0	1.0	0.0	0.0	1.0	1.0	0.0	0.0	0.0	0.0	0.0	1.0	0.0	0.0	0.0	0.0
CLIC2	1193	symbol	H. sapiens	1193	H. sapiens	CLIC2	chloride intracellular channel 2	GO:0060315 negative regulation of ryanodine-sensitive calcium-release channel activity;GO:0051280 negative regulation of release of sequestered calcium ion into cytosol;GO:0051284 positive regulation of sequestering of calcium ion		Human disease related genes:Other diseases:Mental and behavioural disorders; Disease related genes; Potential drug targets; Transporters:Transporter channels and pores; Predicted intracellular proteins	Cytosol;Plasma membrane (Supported); Additional: Nucleoplasm			(M5945)HALLMARK HEME METABOLISM	1.0	0.0	0.0	0.0	0.0	0.0	0.0	0.0	0.0	0.0	0.0	0.0	0.0	0.0	0.0	0.0	0.0	0.0	1.0	0.0
TC2N	123036	symbol	H. sapiens	123036	H. sapiens	TC2N	tandem C2 domains, nuclear			Predicted intracellular proteins	Nuclear bodies;Nucleoplasm (Approved)				0.0	0.0	0.0	0.0	0.0	0.0	0.0	0.0	0.0	0.0	0.0	0.0	0.0	0.0	0.0	0.0	0.0	0.0	0.0	0.0
CAPG	822	symbol	H. sapiens	822	H. sapiens	CAPG	capping actin protein, gelsolin like	GO:0051014 actin filament severing;GO:0051016 barbed-end actin filament capping;GO:0051693 actin filament capping		Predicted intracellular proteins	Nucleoplasm (Enhanced)			(M5947)HALLMARK IL2 STAT5 SIGNALING; (M5930)HALLMARK EPITHELIAL MESENCHYMAL TRANSITION; (M5950)HALLMARK ALLOGRAFT REJECTION	0.0	0.0	0.0	0.0	0.0	0.0	0.0	0.0	1.0	0.0	0.0	1.0	0.0	0.0	0.0	0.0	1.0	0.0	0.0	0.0
CASC2	255082	symbol	H. sapiens	255082	H. sapiens	CASC2	cancer susceptibility 2	GO:0002357 defense response to tumor cell;GO:0002347 response to tumor cell;GO:0043280 positive regulation of cysteine-type endopeptidase activity involved in apoptotic process							0.0	0.0	0.0	0.0	0.0	0.0	0.0	0.0	0.0	0.0	0.0	0.0	0.0	0.0	0.0	1.0	0.0	0.0	0.0	0.0
SYPL1	6856	symbol	H. sapiens	6856	H. sapiens	SYPL1	synaptophysin like 1	GO:0007268 chemical synaptic transmission;GO:0098916 anterograde trans-synaptic signaling;GO:0099537 trans-synaptic signaling							0.0	0.0	0.0	0.0	0.0	0.0	0.0	0.0	0.0	0.0	0.0	0.0	0.0	0.0	0.0	0.0	0.0	0.0	0.0	0.0
MAOB	4129	symbol	H. sapiens	4129	H. sapiens	MAOB	monoamine oxidase B	GO:0010044 response to aluminum ion;GO:0014063 negative regulation of serotonin secretion;GO:0045915 positive regulation of catecholamine metabolic process		Enzymes; FDA approved drug targets:Small molecule drugs; ENZYME proteins:Oxidoreductases		Amphetamine; Phentermine; Tranylcypromine; Phenelzine; Zonisamide; Selegiline; Pioglitazone; Moclobemide; Isocarboxazid; Ephedra sinica root; Rasagiline; MMDA; 4-Methoxyamphetamine; Metamfetamine; Pargyline; Isatin; (R)-N-methyl-N-2-propynyl-1-indanamine; Farnesol; N-Dodecyl-N,N-Dimethyl-3-Ammonio-1-Propanesulfonate; Flavin adenine dinucleotide; N-Propargyl-1(S)-Aminoindan; Dodecyldimethylamine N…	(M275)PID ALPHA SYNUCLEIN PATHWAY	(M5936)HALLMARK OXIDATIVE PHOSPHORYLATION	1.0	0.0	1.0	0.0	0.0	0.0	0.0	0.0	0.0	0.0	1.0	0.0	0.0	0.0	0.0	0.0	0.0	0.0	0.0	0.0
LINC01119	100134259	symbol	H. sapiens	100134259	H. sapiens	LINC01119	long intergenic non-protein coding RNA 1119								0.0	0.0	0.0	0.0	0.0	0.0	0.0	0.0	0.0	0.0	0.0	0.0	0.0	0.0	0.0	0.0	0.0	0.0	0.0	0.0
STAU1	6780	symbol	H. sapiens	6780	H. sapiens	STAU1	staufen double-stranded RNA binding protein 1	GO:0046726 positive regulation by virus of viral protein levels in host cell;GO:0046719 regulation by virus of viral protein levels in host cell;GO:0099010 modification of postsynaptic structure		Predicted intracellular proteins	Cytosol (Enhanced)			(M5893)HALLMARK MITOTIC SPINDLE	0.0	0.0	0.0	0.0	0.0	0.0	0.0	0.0	0.0	1.0	0.0	0.0	0.0	0.0	0.0	0.0	0.0	0.0	0.0	0.0
LRRC2	79442	symbol	H. sapiens	79442	H. sapiens	LRRC2	leucine rich repeat containing 2	GO:0006470 protein dephosphorylation;GO:0016311 dephosphorylation;GO:0006796 phosphate-containing compound metabolic process		Predicted intracellular proteins	Nucleoplasm (Approved); Additional: Cytosol;Nuclear bodies				0.0	0.0	0.0	0.0	0.0	0.0	0.0	0.0	0.0	0.0	0.0	0.0	0.0	0.0	0.0	0.0	0.0	0.0	0.0	0.0
HOXC6	3223	symbol	H. sapiens	3223	H. sapiens	HOXC6	homeobox C6	GO:0048706 embryonic skeletal system development;GO:0009952 anterior/posterior pattern specification;GO:0003002 regionalization		Transcription factors:Helix-turn-helix domains; Predicted intracellular proteins	Nucleoplasm (Supported); Additional: Cytosol				0.0	0.0	0.0	0.0	0.0	0.0	0.0	0.0	0.0	0.0	0.0	0.0	0.0	0.0	0.0	0.0	0.0	0.0	0.0	1.0
FNDC1	84624	symbol	H. sapiens	84624	H. sapiens	FNDC1	fibronectin type III domain containing 1			Predicted secreted proteins; Predicted intracellular proteins	Nuclear speckles (Approved)		(M3008)NABA ECM GLYCOPROTEINS; (M5884)NABA CORE MATRISOME; (M5889)NABA MATRISOME		0.0	0.0	0.0	0.0	0.0	0.0	0.0	0.0	0.0	0.0	0.0	0.0	0.0	0.0	0.0	0.0	0.0	0.0	0.0	0.0
FAM13B	51306	symbol	H. sapiens	51306	H. sapiens	FAM13B	family with sequence similarity 13 member B	GO:0051056 regulation of small GTPase mediated signal transduction;GO:1902531 regulation of intracellular signal transduction;GO:0050790 regulation of catalytic activity		Predicted intracellular proteins	Nucleoplasm (Approved)				0.0	0.0	0.0	0.0	0.0	0.0	0.0	0.0	0.0	0.0	0.0	0.0	0.0	0.0	0.0	0.0	0.0	0.0	0.0	0.0
ZNF217	7764	symbol	H. sapiens	7764	H. sapiens	ZNF217	zinc finger protein 217	GO:0000122 negative regulation of transcription by RNA polymerase II;GO:0045892 negative regulation of transcription, DNA-templated;GO:1903507 negative regulation of nucleic acid-templated transcription		Predicted intracellular proteins; Transcription factors:Zinc-coordinating DNA-binding domains	Nuclear speckles (Enhanced)				0.0	0.0	0.0	0.0	0.0	0.0	0.0	0.0	0.0	0.0	0.0	0.0	0.0	0.0	0.0	0.0	0.0	0.0	0.0	0.0
LOC101927811	101927811	Gene_ID	H. sapiens	101927811	H. sapiens	ITGB8-AS1	ITGB8 antisense RNA 1								0.0	0.0	0.0	0.0	0.0	0.0	0.0	0.0	0.0	0.0	0.0	0.0	0.0	0.0	0.0	0.0	0.0	0.0	0.0	0.0
ITFG2	55846	symbol	H. sapiens	55846	H. sapiens	ITFG2	integrin alpha FG-GAP repeat containing 2	GO:0002314 germinal center B cell differentiation;GO:1904262 negative regulation of TORC1 signaling;GO:0002313 mature B cell differentiation involved in immune response		Predicted intracellular proteins	Endoplasmic reticulum (Uncertain)				0.0	0.0	0.0	0.0	0.0	0.0	0.0	0.0	0.0	0.0	0.0	0.0	0.0	0.0	0.0	0.0	0.0	0.0	0.0	0.0
ACVRL1	94	symbol	H. sapiens	94	H. sapiens	ACVRL1	activin A receptor like type 1	GO:0002043 blood vessel endothelial cell proliferation involved in sprouting angiogenesis;GO:0060836 lymphatic endothelial cell differentiation;GO:0001955 blood vessel maturation	TKL Ser/Thr protein kinase family	Kinases:TKL Ser/Thr protein kinases; Human disease related genes:Congenital malformations:Congenital malformations of the circulatory system; Predicted intracellular proteins; Disease related genes; Potential drug targets; Enzymes; Human disease related genes:Cardiovascular diseases:Hypertensive diseases; ENZYME proteins:Transferases		ATP	(M185)PID ALK1 PATHWAY	(M5897)HALLMARK IL6 JAK STAT3 SIGNALING	0.0	0.0	0.0	0.0	1.0	0.0	0.0	1.0	0.0	0.0	0.0	0.0	1.0	0.0	0.0	0.0	0.0	0.0	1.0	1.0
LINC01272	100506115	gene_synonym	H. sapiens	100506115	H. sapiens	PELATON	plaque enriched lncRNA in atherosclerotic and inflammatory bowel macrophage regulation								0.0	0.0	0.0	0.0	0.0	0.0	0.0	0.0	0.0	0.0	0.0	0.0	0.0	0.0	0.0	0.0	0.0	0.0	0.0	0.0
LINC01279	151887	gene_synonym	H. sapiens	151887	H. sapiens	CCDC80	coiled-coil domain containing 80	GO:0010811 positive regulation of cell-substrate adhesion;GO:0010810 regulation of cell-substrate adhesion;GO:0030198 extracellular matrix organization		Predicted secreted proteins; Predicted intracellular proteins					0.0	0.0	0.0	0.0	0.0	0.0	0.0	0.0	0.0	0.0	0.0	0.0	0.0	0.0	0.0	0.0	0.0	0.0	0.0	0.0
APPL2	55198	symbol	H. sapiens	55198	H. sapiens	APPL2	adaptor protein, phosphotyrosine interacting with PH domain and leucine zipper 2	GO:1905303 positive regulation of macropinocytosis;GO:0009631 cold acclimation;GO:1905451 positive regulation of Fc-gamma receptor signaling pathway involved in phagocytosis		Predicted intracellular proteins; Disease related genes					1.0	0.0	0.0	0.0	0.0	0.0	0.0	1.0	0.0	0.0	1.0	0.0	1.0	0.0	0.0	0.0	0.0	0.0	0.0	0.0
FAM13A-AS1	285512	symbol	H. sapiens	285512	H. sapiens	FAM13A-AS1	FAM13A antisense RNA 1								0.0	0.0	0.0	0.0	0.0	0.0	0.0	0.0	0.0	0.0	0.0	0.0	0.0	0.0	0.0	0.0	0.0	0.0	0.0	0.0
KIF3B	9371	symbol	H. sapiens	9371	H. sapiens	KIF3B	kinesin family member 3B	GO:0036372 opsin transport;GO:0098971 anterograde dendritic transport of neurotransmitter receptor complex;GO:0072383 plus-end-directed vesicle transport along microtubule		Human disease related genes:Nervous system diseases:Eye disease; Predicted intracellular proteins				(M5893)HALLMARK MITOTIC SPINDLE	0.0	0.0	0.0	0.0	0.0	0.0	1.0	0.0	0.0	0.0	0.0	1.0	0.0	0.0	0.0	0.0	0.0	0.0	0.0	1.0
MOB3B	79817	symbol	H. sapiens	79817	H. sapiens	MOB3B	MOB kinase activator 3B	GO:0035330 regulation of hippo signaling;GO:0032147 activation of protein kinase activity;GO:0045860 positive regulation of protein kinase activity		Predicted intracellular proteins	Cytosol;Intermediate filaments (Uncertain)				0.0	0.0	0.0	0.0	0.0	0.0	0.0	0.0	0.0	0.0	0.0	0.0	0.0	0.0	0.0	0.0	0.0	0.0	0.0	0.0
RAP1A	5906	symbol	H. sapiens	5906	H. sapiens	RAP1A	RAP1A, member of RAS oncogene family	GO:2000301 negative regulation of synaptic vesicle exocytosis;GO:0098696 regulation of neurotransmitter receptor localization to postsynaptic specialization membrane;GO:0046929 negative regulation of neurotransmitter secretion		Enzymes; ENZYME proteins:Hydrolases; RAS pathway related proteins; Predicted intracellular proteins			(M69)PID REELIN PATHWAY; (M72)PID NECTIN PATHWAY; (M233)PID EPO PATHWAY		1.0	0.0	1.0	1.0	0.0	1.0	1.0	0.0	1.0	1.0	1.0	0.0	1.0	0.0	0.0	1.0	0.0	1.0	0.0	0.0
MED14	9282	symbol	H. sapiens	9282	H. sapiens	MED14	mediator complex subunit 14	GO:0060261 positive regulation of transcription initiation from RNA polymerase II promoter;GO:2000144 positive regulation of DNA-templated transcription, initiation;GO:0060260 regulation of transcription initiation from RNA polymerase II promoter		Predicted intracellular proteins	Nucleoplasm (Approved)				0.0	0.0	0.0	0.0	0.0	0.0	0.0	0.0	0.0	0.0	0.0	0.0	0.0	0.0	0.0	0.0	0.0	0.0	0.0	0.0
PDCD6IP	10015	symbol	H. sapiens	10015	H. sapiens	PDCD6IP	programmed cell death 6 interacting protein	GO:1903553 positive regulation of extracellular exosome assembly;GO:0000912 assembly of actomyosin apparatus involved in cytokinesis;GO:0000915 actomyosin contractile ring assembly		Predicted intracellular proteins	Vesicles (Approved); Additional: Centrosome				0.0	0.0	0.0	0.0	0.0	0.0	0.0	0.0	0.0	0.0	1.0	0.0	0.0	0.0	0.0	0.0	1.0	0.0	0.0	0.0
ALDH9A1	223	symbol	H. sapiens	223	H. sapiens	ALDH9A1	aldehyde dehydrogenase 9 family member A1	GO:0045329 carnitine biosynthetic process;GO:0006578 amino-acid betaine biosynthetic process;GO:0009437 carnitine metabolic process		Enzymes; Predicted intracellular proteins; ENZYME proteins:Oxidoreductases	Cytosol (Approved)	NADH	(M254)PID MYC REPRESS PATHWAY	(M5949)HALLMARK PEROXISOME; (M5948)HALLMARK BILE ACID METABOLISM; (M5935)HALLMARK FATTY ACID METABOLISM	0.0	0.0	1.0	0.0	0.0	1.0	0.0	0.0	0.0	0.0	0.0	0.0	0.0	0.0	0.0	0.0	0.0	0.0	0.0	0.0
CEP112	201134	symbol	H. sapiens	201134	H. sapiens	CEP112	centrosomal protein 112	GO:0097120 receptor localization to synapse;GO:0031503 protein-containing complex localization;GO:0051179 localization		Predicted intracellular proteins	Centrosome;Nucleoplasm (Approved); Additional: Cytosol;Midbody ring				0.0	0.0	0.0	0.0	0.0	0.0	0.0	0.0	0.0	0.0	0.0	0.0	0.0	0.0	0.0	0.0	0.0	0.0	0.0	0.0
DPT	1805	symbol	H. sapiens	1805	H. sapiens	DPT	dermatopontin	GO:0030199 collagen fibril organization;GO:0030198 extracellular matrix organization;GO:0043062 extracellular structure organization		Predicted secreted proteins	Vesicles (Approved)		(M3008)NABA ECM GLYCOPROTEINS; (M5884)NABA CORE MATRISOME; (M5889)NABA MATRISOME		0.0	0.0	0.0	0.0	0.0	0.0	0.0	0.0	0.0	0.0	0.0	0.0	0.0	0.0	0.0	0.0	1.0	0.0	0.0	0.0
P2RY1	5028	symbol	H. sapiens	5028	H. sapiens	P2RY1	purinergic receptor P2Y1	GO:0010700 negative regulation of norepinephrine secretion;GO:0060406 positive regulation of penile erection;GO:0032962 positive regulation of inositol trisphosphate biosynthetic process		G-protein coupled receptors:GPCRs excl olfactory receptors; Transporters; G-protein coupled receptors:Adenosine and adenine nucleotide receptors				(M5946)HALLMARK COAGULATION	1.0	0.0	1.0	1.0	0.0	0.0	1.0	0.0	0.0	0.0	1.0	0.0	1.0	0.0	0.0	0.0	0.0	0.0	1.0	0.0
NOSTRIN	115677	symbol	H. sapiens	115677	H. sapiens	NOSTRIN	nitric oxide synthase trafficking	GO:0016191 synaptic vesicle uncoating;GO:0072318 clathrin coat disassembly;GO:0072319 vesicle uncoating		Predicted intracellular proteins	Cytosol (Approved); Additional: Vesicles				0.0	0.0	0.0	0.0	0.0	0.0	0.0	0.0	0.0	0.0	0.0	0.0	0.0	0.0	0.0	0.0	0.0	0.0	0.0	0.0
PINLYP	390940	symbol	H. sapiens	390940	H. sapiens	PINLYP	phospholipase A2 inhibitor and LY6/PLAUR domain containing	GO:0043086 negative regulation of catalytic activity;GO:0044092 negative regulation of molecular function;GO:0050790 regulation of catalytic activity		Predicted secreted proteins; Predicted intracellular proteins	Vesicles (Approved)				0.0	0.0	0.0	0.0	0.0	0.0	0.0	0.0	0.0	0.0	0.0	0.0	0.0	0.0	0.0	0.0	0.0	0.0	0.0	0.0
CLEC2B	9976	symbol	H. sapiens	9976	H. sapiens	CLEC2B	C-type lectin domain family 2 member B			Predicted intracellular proteins			(M5880)NABA ECM AFFILIATED; (M5885)NABA MATRISOME ASSOCIATED; (M5889)NABA MATRISOME		0.0	0.0	0.0	0.0	0.0	0.0	0.0	0.0	0.0	0.0	0.0	0.0	0.0	0.0	0.0	0.0	0.0	0.0	0.0	0.0
AP3S1	1176	symbol	H. sapiens	1176	H. sapiens	AP3S1	adaptor related protein complex 3 subunit sigma 1	GO:0048490 anterograde synaptic vesicle transport;GO:0099514 synaptic vesicle cytoskeletal transport;GO:0099517 synaptic vesicle transport along microtubule		Predicted intracellular proteins	Vesicles (Approved)			(M5910)HALLMARK PROTEIN SECRETION; (M5926)HALLMARK MYC TARGETS V1	0.0	0.0	0.0	0.0	0.0	0.0	0.0	1.0	0.0	0.0	0.0	0.0	0.0	0.0	0.0	0.0	0.0	0.0	0.0	0.0
BEND7	222389	symbol	H. sapiens	222389	H. sapiens	BEND7	BEN domain containing 7			Predicted intracellular proteins	Nucleoli fibrillar center;Nucleoplasm;Vesicles (Approved)				0.0	0.0	0.0	0.0	0.0	0.0	0.0	0.0	0.0	0.0	0.0	0.0	0.0	0.0	0.0	0.0	0.0	0.0	0.0	0.0
GANC	2595	symbol	H. sapiens	2595	H. sapiens	GANC	glucosidase alpha, neutral C	GO:0000023 maltose metabolic process;GO:0005984 disaccharide metabolic process;GO:0006491 N-glycan processing		Enzymes; ENZYME proteins:Hydrolases; FDA approved drug targets:Small molecule drugs; Predicted intracellular proteins	Cytosol (Approved)	Miglitol			0.0	0.0	0.0	0.0	0.0	0.0	0.0	0.0	0.0	0.0	0.0	0.0	0.0	0.0	0.0	0.0	0.0	0.0	0.0	0.0
ZDHHC6	64429	symbol	H. sapiens	64429	H. sapiens	ZDHHC6	zinc finger DHHC-type palmitoyltransferase 6	GO:0140438 protein stearoylation;GO:0010636 positive regulation of mitochondrial fusion;GO:0010635 regulation of mitochondrial fusion		Enzymes; ENZYME proteins:Transferases					0.0	0.0	0.0	0.0	0.0	0.0	0.0	0.0	0.0	0.0	0.0	0.0	0.0	0.0	0.0	0.0	0.0	0.0	0.0	0.0
CYP26B1	56603	symbol	H. sapiens	56603	H. sapiens	CYP26B1	cytochrome P450 family 26 subfamily B member 1	GO:2001035 regulation of tongue muscle cell differentiation;GO:2001037 positive regulation of tongue muscle cell differentiation;GO:1902811 positive regulation of skeletal muscle fiber differentiation		Predicted intracellular proteins; Disease related genes	Cytosol (Approved)	Tretinoin		(M5906)HALLMARK ESTROGEN RESPONSE EARLY; (M5907)HALLMARK ESTROGEN RESPONSE LATE	0.0	0.0	0.0	0.0	0.0	0.0	0.0	0.0	0.0	0.0	0.0	0.0	0.0	0.0	0.0	0.0	0.0	0.0	0.0	1.0
FEZ1	9638	symbol	H. sapiens	9638	H. sapiens	FEZ1	fasciculation and elongation protein zeta 1	GO:0061880 regulation of anterograde axonal transport of mitochondrion;GO:0061881 positive regulation of anterograde axonal transport of mitochondrion;GO:1902513 regulation of organelle transport along microtubule		Predicted intracellular proteins	Cytosol;Microtubules (Approved)			(M5902)HALLMARK APOPTOSIS	0.0	0.0	0.0	0.0	0.0	0.0	0.0	0.0	0.0	0.0	0.0	0.0	1.0	0.0	1.0	0.0	0.0	0.0	0.0	0.0
CYB5A	1528	symbol	H. sapiens	1528	H. sapiens	CYB5A	cytochrome b5 type A	GO:1902600 proton transmembrane transport;GO:0022900 electron transport chain;GO:0006091 generation of precursor metabolites and energy		Human disease related genes:Cardiovascular diseases:Hematologic diseases; Predicted intracellular proteins; Disease related genes	Cytosol;Vesicles (Enhanced)	Dimethyl Propionate Ester Heme; Chromium; Chromic citrate; Chromic nitrate; Chromium gluconate; Chromium nicotinate; Chromous sulfate		(M5934)HALLMARK XENOBIOTIC METABOLISM; (M5936)HALLMARK OXIDATIVE PHOSPHORYLATION; (M5937)HALLMARK GLYCOLYSIS	0.0	0.0	0.0	0.0	0.0	0.0	0.0	0.0	0.0	0.0	0.0	0.0	0.0	0.0	0.0	0.0	0.0	0.0	0.0	0.0
C15orf59	388135	gene_synonym	H. sapiens	388135	H. sapiens	INSYN1	inhibitory synaptic factor 1	GO:0060080 inhibitory postsynaptic potential;GO:0099565 chemical synaptic transmission, postsynaptic;GO:0060078 regulation of postsynaptic membrane potential		Predicted intracellular proteins	Cytosol;Nucleoplasm (Approved)				0.0	0.0	0.0	0.0	0.0	0.0	0.0	0.0	0.0	0.0	0.0	0.0	0.0	0.0	0.0	0.0	0.0	0.0	0.0	0.0
ASAP1	50807	symbol	H. sapiens	50807	H. sapiens	ASAP1	ArfGAP with SH3 domain, ankyrin repeat and PH domain 1	GO:1903527 positive regulation of membrane tubulation;GO:1903525 regulation of membrane tubulation;GO:0071803 positive regulation of podosome assembly		Predicted intracellular proteins	Centrosome;Cytosol;Plasma membrane (Approved)		(M243)PID ARF 3PATHWAY; (M281)PID FAK PATHWAY		0.0	0.0	0.0	1.0	0.0	0.0	0.0	0.0	1.0	0.0	0.0	1.0	0.0	0.0	0.0	1.0	0.0	0.0	0.0	0.0
PRTFDC1	56952	symbol	H. sapiens	56952	H. sapiens	PRTFDC1	phosphoribosyl transferase domain containing 1	GO:0006166 purine ribonucleoside salvage;GO:0043174 nucleoside salvage;GO:0042451 purine nucleoside biosynthetic process		Predicted intracellular proteins	Nucleoplasm (Approved); Additional: Cytosol;Golgi apparatus				0.0	0.0	0.0	0.0	0.0	0.0	0.0	0.0	0.0	0.0	0.0	0.0	0.0	0.0	0.0	0.0	0.0	0.0	0.0	0.0
CBLL1	79872	symbol	H. sapiens	79872	H. sapiens	CBLL1	Cbl proto-oncogene like 1	GO:0080009 mRNA methylation;GO:0016556 mRNA modification;GO:0001510 RNA methylation		Enzymes; Predicted intracellular proteins; ENZYME proteins:Transferases	Nuclear speckles (Supported)		(M142)PID AJDISS 2PATHWAY		0.0	0.0	0.0	0.0	0.0	0.0	0.0	0.0	0.0	0.0	1.0	0.0	0.0	0.0	1.0	0.0	0.0	0.0	0.0	0.0
ZHX2	22882	symbol	H. sapiens	22882	H. sapiens	ZHX2	zinc fingers and homeoboxes 2	GO:0060040 retinal bipolar neuron differentiation;GO:1905962 glutamatergic neuron differentiation;GO:0035019 somatic stem cell population maintenance		Transcription factors:Helix-turn-helix domains; Predicted intracellular proteins	Nucleoplasm (Enhanced)				0.0	0.0	0.0	0.0	0.0	0.0	0.0	0.0	0.0	0.0	0.0	0.0	0.0	0.0	0.0	0.0	0.0	0.0	0.0	0.0
PLCE1	51196	symbol	H. sapiens	51196	H. sapiens	PLCE1	phospholipase C epsilon 1	GO:0006651 diacylglycerol biosynthetic process;GO:0048016 inositol phosphate-mediated signaling;GO:0046339 diacylglycerol metabolic process		ENZYME proteins:Hydrolases; Disease related genes; Potential drug targets; Enzymes; Human disease related genes:Urinary system diseases:Kidney diseases; RAS pathway related proteins; Predicted intracellular proteins	Cytosol (Supported)		(M269)PID RAS PATHWAY		0.0	0.0	0.0	1.0	0.0	1.0	0.0	1.0	1.0	0.0	0.0	0.0	0.0	0.0	0.0	0.0	0.0	0.0	0.0	0.0
C8orf33	65265	symbol	H. sapiens	65265	H. sapiens	C8orf33	chromosome 8 open reading frame 33			Predicted intracellular proteins	Nucleoplasm;Plasma membrane (Uncertain)				0.0	0.0	0.0	0.0	0.0	0.0	0.0	0.0	0.0	0.0	0.0	0.0	0.0	0.0	0.0	0.0	0.0	0.0	0.0	0.0
SLC9A8	23315	symbol	H. sapiens	23315	H. sapiens	SLC9A8	solute carrier family 9 member A8	GO:0051453 regulation of intracellular pH;GO:0030641 regulation of cellular pH;GO:0006885 regulation of pH		Transporters:Electrochemical Potential-driven transporters					0.0	0.0	0.0	0.0	0.0	0.0	0.0	0.0	0.0	0.0	0.0	0.0	0.0	0.0	0.0	0.0	0.0	0.0	0.0	0.0
LOC105375734	105375734	Gene_ID	H. sapiens	105375734	H. sapiens	SMILR	smooth muscle induced lncRNA, enhancer of proliferation								0.0	0.0	0.0	0.0	0.0	0.0	0.0	0.0	0.0	0.0	0.0	0.0	0.0	0.0	0.0	0.0	0.0	0.0	0.0	0.0
RALA	5898	symbol	H. sapiens	5898	H. sapiens	RALA	RAS like proto-oncogene A	GO:0051665 membrane raft localization;GO:0090141 positive regulation of mitochondrial fission;GO:0051491 positive regulation of filopodium assembly		Enzymes; ENZYME proteins:Hydrolases; RAS pathway related proteins; Predicted intracellular proteins	Plasma membrane (Supported); Additional: Focal adhesion sites	Guanosine-5'-Diphosphate	(M76)PID P38 ALPHA BETA PATHWAY; (M67)PID ARF6 TRAFFICKING PATHWAY; (M136)PID FOXO PATHWAY	(M5898)HALLMARK DNA REPAIR	0.0	1.0	0.0	1.0	1.0	1.0	0.0	0.0	1.0	0.0	1.0	0.0	0.0	0.0	0.0	0.0	1.0	0.0	0.0	0.0
MYH1	4619	symbol	H. sapiens	4619	H. sapiens	MYH1	myosin heavy chain 1	GO:0006936 muscle contraction;GO:0003012 muscle system process;GO:0003008 system process		Predicted intracellular proteins	Focal adhesion sites (Uncertain)			(M5909)HALLMARK MYOGENESIS	0.0	0.0	0.0	0.0	0.0	0.0	0.0	0.0	0.0	0.0	0.0	0.0	0.0	0.0	0.0	0.0	0.0	0.0	0.0	0.0
ZNF572	137209	symbol	H. sapiens	137209	H. sapiens	ZNF572	zinc finger protein 572	GO:0000122 negative regulation of transcription by RNA polymerase II;GO:0045892 negative regulation of transcription, DNA-templated;GO:1903507 negative regulation of nucleic acid-templated transcription		Predicted intracellular proteins; Transcription factors:Zinc-coordinating DNA-binding domains	Nuclear speckles (Approved)				0.0	0.0	0.0	0.0	0.0	0.0	0.0	0.0	0.0	0.0	0.0	0.0	0.0	0.0	0.0	0.0	0.0	0.0	0.0	0.0
USP25	29761	symbol	H. sapiens	29761	H. sapiens	USP25	ubiquitin specific peptidase 25	GO:1904293 negative regulation of ERAD pathway;GO:1904292 regulation of ERAD pathway;GO:0070536 protein K63-linked deubiquitination		Enzymes; ENZYME proteins:Hydrolases; Predicted intracellular proteins; Peptidases:Cysteine-type peptidases	Cytosol (Supported)				0.0	0.0	0.0	0.0	0.0	1.0	0.0	0.0	0.0	0.0	0.0	0.0	0.0	0.0	0.0	1.0	0.0	0.0	0.0	0.0
ATP1A3	478	symbol	H. sapiens	478	H. sapiens	ATP1A3	ATPase Na+/K+ transporting subunit alpha 3	GO:1903416 response to glycoside;GO:0010248 establishment or maintenance of transmembrane electrochemical gradient;GO:0060075 regulation of resting membrane potential		Human disease related genes:Congenital malformations:Congenital malformations of the nervous system; Human disease related genes:Nervous system diseases:Other nervous and sensory system diseases; ENZYME proteins; Disease related genes; Potential drug targets; Enzymes; Transporters:Primary Active Transporters; Predicted intracellular proteins		Ouabain		(M5915)HALLMARK APICAL JUNCTION	0.0	0.0	0.0	0.0	0.0	0.0	0.0	0.0	0.0	0.0	0.0	0.0	0.0	0.0	0.0	0.0	0.0	0.0	1.0	0.0
SLC31A2	1318	symbol	H. sapiens	1318	H. sapiens	SLC31A2	solute carrier family 31 member 2	GO:1902311 regulation of copper ion transmembrane transport;GO:0035434 copper ion transmembrane transport;GO:0006878 cellular copper ion homeostasis		Transporters:Transporter channels and pores	Nuclear speckles (Approved); Additional: Intermediate filaments;Plasma membrane			(M5932)HALLMARK INFLAMMATORY RESPONSE	1.0	0.0	0.0	0.0	0.0	0.0	0.0	0.0	0.0	0.0	0.0	0.0	0.0	0.0	0.0	0.0	0.0	0.0	0.0	0.0
ZNF41	7592	symbol	H. sapiens	7592	H. sapiens	ZNF41	zinc finger protein 41	GO:0006357 regulation of transcription by RNA polymerase II;GO:0006355 regulation of transcription, DNA-templated;GO:1903506 regulation of nucleic acid-templated transcription		Transcription factors:Zinc-coordinating DNA-binding domains; Predicted intracellular proteins; Disease related genes	Nucleoplasm (Approved)				0.0	0.0	0.0	0.0	0.0	0.0	0.0	0.0	0.0	0.0	0.0	0.0	0.0	0.0	0.0	0.0	0.0	0.0	0.0	0.0
VPS26A	9559	symbol	H. sapiens	9559	H. sapiens	VPS26A	VPS26, retromer complex component A	GO:0032456 endocytic recycling;GO:0042147 retrograde transport, endosome to Golgi;GO:0098876 vesicle-mediated transport to the plasma membrane		Transporters; Predicted intracellular proteins	Endosomes;Lysosomes (Enhanced)				0.0	0.0	0.0	0.0	0.0	0.0	0.0	0.0	0.0	0.0	0.0	0.0	0.0	0.0	0.0	0.0	0.0	0.0	0.0	0.0
BCL2L2	599	symbol	H. sapiens	599	H. sapiens	BCL2L2	BCL2 like 2	GO:1905430 cellular response to glycine;GO:1905429 response to glycine;GO:0060011 Sertoli cell proliferation		Transporters:Transporter channels and pores; Predicted intracellular proteins; Cancer-related genes:Candidate cancer biomarkers	Nucleoplasm (Uncertain)	Navitoclax	(M145)PID P53 DOWNSTREAM PATHWAY	(M5902)HALLMARK APOPTOSIS	0.0	0.0	0.0	0.0	0.0	0.0	0.0	0.0	0.0	0.0	0.0	0.0	0.0	0.0	0.0	0.0	0.0	0.0	0.0	0.0
PEA15	8682	symbol	H. sapiens	8682	H. sapiens	PEA15	proliferation and apoptosis adaptor protein 15	GO:1902043 positive regulation of extrinsic apoptotic signaling pathway via death domain receptors;GO:0046325 negative regulation of glucose import;GO:0010829 negative regulation of glucose transmembrane transport		Predicted intracellular proteins	Cytosol (Supported); Additional: Nucleoplasm		(M19)PID P73PATHWAY	(M5902)HALLMARK APOPTOSIS	1.0	0.0	0.0	1.0	0.0	0.0	0.0	0.0	0.0	0.0	0.0	0.0	0.0	0.0	0.0	0.0	0.0	0.0	0.0	0.0
TDRD6	221400	symbol	H. sapiens	221400	H. sapiens	TDRD6	tudor domain containing 6	GO:0007314 oocyte anterior/posterior axis specification;GO:0007315 pole plasm assembly;GO:0008358 maternal determination of anterior/posterior axis, embryo		Predicted intracellular proteins; Cancer-related genes:Candidate cancer biomarkers	Cytokinetic bridge;Microtubules;Mitotic spindle (Approved); Additional: Vesicles				0.0	0.0	0.0	0.0	1.0	0.0	0.0	0.0	0.0	0.0	0.0	0.0	0.0	0.0	0.0	0.0	0.0	0.0	0.0	1.0
DNM3	26052	symbol	H. sapiens	26052	H. sapiens	DNM3	dynamin 3	GO:0098884 postsynaptic neurotransmitter receptor internalization;GO:0140239 postsynaptic endocytosis;GO:0061002 negative regulation of dendritic spine morphogenesis		Enzymes; ENZYME proteins:Hydrolases; Predicted intracellular proteins	Golgi apparatus (Approved)				0.0	0.0	0.0	1.0	0.0	1.0	0.0	0.0	0.0	0.0	0.0	1.0	0.0	0.0	0.0	0.0	0.0	0.0	0.0	0.0
HOXB5	3215	symbol	H. sapiens	3215	H. sapiens	HOXB5	homeobox B5	GO:0045446 endothelial cell differentiation;GO:0003158 endothelium development;GO:0048704 embryonic skeletal system morphogenesis		Transcription factors:Helix-turn-helix domains; Predicted intracellular proteins	Nucleoplasm (Supported); Additional: Cytosol;Nucleoli fibrillar center				0.0	0.0	0.0	0.0	0.0	0.0	0.0	0.0	0.0	0.0	0.0	0.0	0.0	0.0	0.0	0.0	0.0	0.0	0.0	1.0
CLK1	1195	symbol	H. sapiens	1195	H. sapiens	CLK1	CDC like kinase 1	GO:0018107 peptidyl-threonine phosphorylation;GO:0018210 peptidyl-threonine modification;GO:0018108 peptidyl-tyrosine phosphorylation	CMGC Ser/Thr protein kinase family	Enzymes; Kinases:CMGC Ser/Thr protein kinases; Predicted intracellular proteins; ENZYME proteins:Transferases	Nuclear membrane;Nucleoplasm (Supported)	Debromohymenialdisine; CHGN111; ethyl 3-[(E)-2-amino-1-cyanoethenyl]-6,7-dichloro-1-methyl-1H-indole-2-carboxylate; Fostamatinib			0.0	0.0	0.0	0.0	0.0	1.0	0.0	0.0	0.0	0.0	0.0	0.0	0.0	0.0	0.0	0.0	0.0	0.0	0.0	0.0
PSG2	5670	symbol	H. sapiens	5670	H. sapiens	PSG2	pregnancy specific beta-1-glycoprotein 2	GO:0007565 female pregnancy;GO:0044706 multi-multicellular organism process;GO:0016477 cell migration		Predicted secreted proteins; Predicted intracellular proteins					0.0	0.0	0.0	0.0	0.0	0.0	1.0	0.0	0.0	0.0	0.0	0.0	0.0	0.0	0.0	0.0	0.0	0.0	1.0	0.0
C11orf63	79864	gene_synonym	H. sapiens	79864	H. sapiens	JHY	junctional cadherin complex regulator	GO:0090660 cerebrospinal fluid circulation;GO:0003351 epithelial cilium movement involved in extracellular fluid movement;GO:0006858 extracellular transport		Predicted intracellular proteins	Nucleoplasm (Supported); Additional: Golgi apparatus				0.0	0.0	0.0	0.0	0.0	0.0	0.0	0.0	0.0	0.0	0.0	1.0	0.0	0.0	0.0	0.0	0.0	0.0	0.0	0.0
PDK4	5166	symbol	H. sapiens	5166	H. sapiens	PDK4	pyruvate dehydrogenase kinase 4	GO:0010510 regulation of acetyl-CoA biosynthetic process from pyruvate;GO:0050812 regulation of acyl-CoA biosynthetic process;GO:0042762 regulation of sulfur metabolic process	Atypical: PDK/BCKDK protein kinase family	Enzymes; Predicted intracellular proteins; Kinases:Atypical kinases; ENZYME proteins:Transferases		Tretinoin; 4-[4-(4-methoxyphenyl)-5-methyl-1H-pyrazol-3-yl]benzene-1,3-diol		(M5934)HALLMARK XENOBIOTIC METABOLISM; (M5936)HALLMARK OXIDATIVE PHOSPHORYLATION	0.0	0.0	0.0	0.0	0.0	0.0	0.0	1.0	0.0	0.0	0.0	0.0	0.0	0.0	0.0	0.0	0.0	0.0	0.0	0.0
CYP39A1	51302	symbol	H. sapiens	51302	H. sapiens	CYP39A1	cytochrome P450 family 39 subfamily A member 1	GO:0006707 cholesterol catabolic process;GO:0016127 sterol catabolic process;GO:0006699 bile acid biosynthetic process		Enzymes; ENZYME proteins:Oxidoreductases				(M5948)HALLMARK BILE ACID METABOLISM; (M5956)HALLMARK KRAS SIGNALING DN	0.0	0.0	1.0	0.0	0.0	0.0	0.0	0.0	0.0	0.0	0.0	0.0	0.0	0.0	0.0	0.0	0.0	0.0	0.0	0.0
PSTPIP1	9051	symbol	H. sapiens	9051	H. sapiens	PSTPIP1	proline-serine-threonine phosphatase interacting protein 1	GO:0030041 actin filament polymerization;GO:0008154 actin polymerization or depolymerization;GO:0051258 protein polymerization		Predicted intracellular proteins; Disease related genes; Human disease related genes:Immune system diseases:Other immune system diseases	Cytosol;Plasma membrane (Supported)				0.0	0.0	0.0	0.0	0.0	1.0	0.0	0.0	1.0	0.0	0.0	0.0	0.0	0.0	0.0	0.0	1.0	0.0	0.0	0.0
FAM20A	54757	symbol	H. sapiens	54757	H. sapiens	FAM20A	FAM20A golgi associated secretory pathway pseudokinase	GO:0044691 tooth eruption;GO:0070166 enamel mineralization;GO:0034505 tooth mineralization		Predicted secreted proteins; Human disease related genes:Digestive system diseases:Mouth and dental diseases; Predicted intracellular proteins; Disease related genes			(M3468)NABA ECM REGULATORS; (M5885)NABA MATRISOME ASSOCIATED; (M5889)NABA MATRISOME		0.0	0.0	0.0	0.0	0.0	0.0	0.0	0.0	0.0	0.0	0.0	0.0	0.0	0.0	0.0	0.0	0.0	0.0	0.0	0.0
PHF11	51131	symbol	H. sapiens	51131	H. sapiens	PHF11	PHD finger protein 11			Predicted intracellular proteins	Nucleoplasm (Supported); Additional: Nuclear membrane		(M1315)SIG PIP3 SIGNALING IN B LYMPHOCYTES		0.0	0.0	0.0	0.0	0.0	0.0	0.0	0.0	0.0	0.0	0.0	0.0	0.0	0.0	0.0	0.0	0.0	0.0	0.0	0.0
SUSD1	64420	symbol	H. sapiens	64420	H. sapiens	SUSD1	sushi domain containing 1			Predicted intracellular proteins	Nucleoplasm (Approved)				0.0	0.0	0.0	0.0	0.0	0.0	0.0	0.0	0.0	0.0	0.0	0.0	0.0	0.0	0.0	0.0	0.0	0.0	0.0	0.0
MACROD2	140733	symbol	H. sapiens	140733	H. sapiens	MACROD2	mono-ADP ribosylhydrolase 2	GO:0140291 peptidyl-glutamate ADP-deribosylation;GO:0051725 protein de-ADP-ribosylation;GO:0042278 purine nucleoside metabolic process		Predicted intracellular proteins	Nucleoli;Nucleoplasm (Supported)				0.0	0.0	0.0	0.0	0.0	0.0	0.0	0.0	0.0	0.0	0.0	0.0	0.0	0.0	0.0	0.0	0.0	0.0	0.0	0.0
SNAPC1	6617	symbol	H. sapiens	6617	H. sapiens	SNAPC1	small nuclear RNA activating complex polypeptide 1	GO:0042796 snRNA transcription by RNA polymerase III;GO:0042795 snRNA transcription by RNA polymerase II;GO:0009301 snRNA transcription		Predicted intracellular proteins	Nucleoli (Enhanced); Additional: Nucleoplasm				0.0	0.0	0.0	0.0	0.0	0.0	0.0	0.0	0.0	0.0	0.0	0.0	0.0	0.0	0.0	0.0	0.0	0.0	0.0	0.0
CPOX	1371	symbol	H. sapiens	1371	H. sapiens	CPOX	coproporphyrinogen oxidase	GO:0051597 response to methylmercury;GO:0017085 response to insecticide;GO:0006782 protoporphyrinogen IX biosynthetic process		Human disease related genes:Congenital disorders of metabolism:Congenital disorders of cofactor/vitamin metabolism; ENZYME proteins:Oxidoreductases; Disease related genes; Potential drug targets; Enzymes	Mitochondria (Supported)			(M5935)HALLMARK FATTY ACID METABOLISM; (M5945)HALLMARK HEME METABOLISM	0.0	0.0	0.0	0.0	0.0	0.0	0.0	0.0	0.0	0.0	0.0	0.0	0.0	0.0	0.0	0.0	0.0	0.0	0.0	0.0
FASTKD1	79675	symbol	H. sapiens	79675	H. sapiens	FASTKD1	FAST kinase domains 1	GO:0044528 regulation of mitochondrial mRNA stability;GO:0000963 mitochondrial RNA processing;GO:0000959 mitochondrial RNA metabolic process		Predicted intracellular proteins					0.0	0.0	0.0	0.0	0.0	0.0	0.0	0.0	0.0	0.0	0.0	0.0	0.0	0.0	0.0	0.0	0.0	0.0	0.0	0.0
RNF19A	25897	symbol	H. sapiens	25897	H. sapiens	RNF19A	ring finger protein 19A, RBR E3 ubiquitin protein ligase	GO:0099576 regulation of protein catabolic process at postsynapse, modulating synaptic transmission;GO:0099170 postsynaptic modulation of chemical synaptic transmission;GO:0032436 positive regulation of proteasomal ubiquitin-dependent protein catabolic process		Enzymes; Predicted intracellular proteins; ENZYME proteins:Transferases				(M5945)HALLMARK HEME METABOLISM	0.0	0.0	0.0	0.0	0.0	0.0	0.0	0.0	0.0	0.0	0.0	0.0	0.0	0.0	0.0	1.0	0.0	0.0	0.0	0.0
CCDC82	79780	symbol	H. sapiens	79780	H. sapiens	CCDC82	coiled-coil domain containing 82			Predicted intracellular proteins	Nucleoplasm (Approved); Additional: Cytosol;Nuclear bodies				0.0	0.0	0.0	0.0	0.0	0.0	0.0	0.0	0.0	0.0	0.0	0.0	0.0	0.0	0.0	0.0	0.0	0.0	0.0	0.0
CCNDBP1	23582	symbol	H. sapiens	23582	H. sapiens	CCNDBP1	cyclin D1 binding protein 1	GO:0051726 regulation of cell cycle;GO:0007049 cell cycle;GO:0050794 regulation of cellular process		Predicted intracellular proteins	Nucleoplasm (Enhanced); Additional: Nuclear bodies				0.0	0.0	0.0	0.0	0.0	0.0	0.0	0.0	0.0	0.0	0.0	0.0	0.0	0.0	0.0	0.0	0.0	0.0	0.0	0.0
CEP126	57562	symbol	H. sapiens	57562	H. sapiens	CEP126	centrosomal protein 126	GO:1905515 non-motile cilium assembly;GO:0031122 cytoplasmic microtubule organization;GO:0007052 mitotic spindle organization		Predicted intracellular proteins	Cytosol;Nucleoplasm (Uncertain)				0.0	0.0	0.0	0.0	0.0	0.0	0.0	0.0	0.0	0.0	0.0	1.0	0.0	0.0	0.0	0.0	1.0	0.0	0.0	0.0
FBXO36	130888	symbol	H. sapiens	130888	H. sapiens	FBXO36	F-box protein 36			Predicted intracellular proteins	Nucleoli;Nucleoplasm (Approved)				0.0	0.0	0.0	0.0	0.0	0.0	0.0	0.0	0.0	0.0	0.0	0.0	0.0	0.0	0.0	0.0	0.0	0.0	0.0	0.0
FUCA2	2519	symbol	H. sapiens	2519	H. sapiens	FUCA2	alpha-L-fucosidase 2	GO:2000535 regulation of entry of bacterium into host cell;GO:0016139 glycoside catabolic process;GO:0006004 fucose metabolic process		Enzymes; ENZYME proteins:Hydrolases; Predicted secreted proteins; Predicted intracellular proteins					0.0	0.0	0.0	0.0	0.0	0.0	0.0	0.0	0.0	0.0	0.0	0.0	0.0	0.0	0.0	0.0	0.0	1.0	0.0	0.0
FASTKD3	79072	symbol	H. sapiens	79072	H. sapiens	FASTKD3	FAST kinase domains 3	GO:0044528 regulation of mitochondrial mRNA stability;GO:0070131 positive regulation of mitochondrial translation;GO:0000963 mitochondrial RNA processing		Predicted intracellular proteins	Mitochondria;Nucleoplasm (Supported)				0.0	0.0	0.0	0.0	0.0	0.0	0.0	0.0	0.0	0.0	0.0	0.0	0.0	0.0	0.0	0.0	0.0	0.0	0.0	0.0
PSMD5	5711	symbol	H. sapiens	5711	H. sapiens	PSMD5	proteasome 26S subunit, non-ATPase 5	GO:0070682 proteasome regulatory particle assembly;GO:0043248 proteasome assembly;GO:0034622 cellular protein-containing complex assembly		Predicted intracellular proteins	Cytosol (Approved); Additional: Nucleoplasm				0.0	1.0	0.0	1.0	0.0	1.0	0.0	0.0	0.0	0.0	0.0	0.0	0.0	0.0	0.0	0.0	0.0	0.0	0.0	0.0
ABLIM3	22885	symbol	H. sapiens	22885	H. sapiens	ABLIM3	actin binding LIM protein family member 3	GO:1903955 positive regulation of protein targeting to mitochondrion;GO:0030032 lamellipodium assembly;GO:1903749 positive regulation of establishment of protein localization to mitochondrion		Predicted intracellular proteins	Nucleoplasm;Plasma membrane (Approved); Additional: Cell Junctions				0.0	0.0	0.0	0.0	0.0	1.0	0.0	0.0	0.0	0.0	0.0	1.0	0.0	0.0	0.0	0.0	1.0	0.0	0.0	0.0
DKK2	27123	symbol	H. sapiens	27123	H. sapiens	DKK2	dickkopf WNT signaling pathway inhibitor 2	GO:2000272 negative regulation of signaling receptor activity;GO:0090263 positive regulation of canonical Wnt signaling pathway;GO:0090090 negative regulation of canonical Wnt signaling pathway		Predicted secreted proteins; Predicted intracellular proteins	Golgi apparatus (Supported)		(M70)PID PS1 PATHWAY		0.0	0.0	0.0	1.0	0.0	0.0	0.0	0.0	0.0	0.0	0.0	0.0	0.0	0.0	0.0	0.0	0.0	0.0	0.0	0.0
PRKG2	5593	symbol	H. sapiens	5593	H. sapiens	PRKG2	protein kinase cGMP-dependent 2	GO:2001226 negative regulation of chloride transport;GO:0036289 peptidyl-serine autophosphorylation;GO:0046146 tetrahydrobiopterin metabolic process	AGC Ser/Thr protein kinase family	Enzymes; Kinases:AGC Ser/Thr protein kinases; Predicted intracellular proteins; ENZYME proteins:Transferases		Fostamatinib		(M5953)HALLMARK KRAS SIGNALING UP	1.0	0.0	0.0	1.0	0.0	1.0	1.0	0.0	0.0	0.0	0.0	0.0	0.0	0.0	0.0	0.0	0.0	0.0	0.0	0.0
CD109	135228	symbol	H. sapiens	135228	H. sapiens	CD109	CD109 molecule	GO:0072675 osteoclast fusion;GO:0072674 multinuclear osteoclast differentiation;GO:0010839 negative regulation of keratinocyte proliferation		CD markers	Plasma membrane (Supported); Additional: Cytosol		(M3468)NABA ECM REGULATORS; (M5885)NABA MATRISOME ASSOCIATED; (M5889)NABA MATRISOME		0.0	0.0	0.0	0.0	0.0	0.0	1.0	0.0	0.0	0.0	0.0	0.0	0.0	0.0	0.0	1.0	0.0	0.0	0.0	0.0
MYOC	4653	symbol	H. sapiens	4653	H. sapiens	MYOC	myocilin	GO:0014734 skeletal muscle hypertrophy;GO:0038133 ERBB2-ERBB3 signaling pathway;GO:0038129 ERBB3 signaling pathway		Human disease related genes:Nervous system diseases:Eye disease; Predicted secreted proteins; Disease related genes					0.0	0.0	0.0	0.0	1.0	0.0	0.0	1.0	0.0	0.0	0.0	0.0	0.0	0.0	1.0	0.0	0.0	0.0	0.0	1.0
ZC2HC1A	51101	symbol	H. sapiens	51101	H. sapiens	ZC2HC1A	zinc finger C2HC-type containing 1A			Predicted intracellular proteins	Cytosol (Approved); Additional: Actin filaments				0.0	0.0	0.0	0.0	0.0	0.0	0.0	0.0	0.0	0.0	0.0	0.0	0.0	0.0	0.0	0.0	0.0	0.0	0.0	0.0
MTMR11	10903	symbol	H. sapiens	10903	H. sapiens	MTMR11	myotubularin related protein 11	GO:0046856 phosphatidylinositol dephosphorylation;GO:0046839 phospholipid dephosphorylation;GO:0046488 phosphatidylinositol metabolic process		Predicted intracellular proteins	Centrosome (Approved)				0.0	0.0	0.0	0.0	0.0	0.0	0.0	0.0	0.0	0.0	0.0	0.0	0.0	0.0	0.0	0.0	0.0	0.0	0.0	0.0
LINC01550	388011	symbol	H. sapiens	388011	H. sapiens	LINC01550	long intergenic non-protein coding RNA 1550								0.0	0.0	0.0	0.0	0.0	0.0	0.0	0.0	0.0	0.0	0.0	0.0	0.0	0.0	0.0	0.0	0.0	0.0	0.0	0.0
HP1BP3	50809	symbol	H. sapiens	50809	H. sapiens	HP1BP3	heterochromatin protein 1 binding protein 3	GO:0097298 regulation of nucleus size;GO:0070828 heterochromatin organization;GO:0006334 nucleosome assembly		Predicted intracellular proteins	Nuclear speckles (Supported)	Artenimol			0.0	0.0	0.0	0.0	0.0	0.0	0.0	0.0	0.0	0.0	0.0	0.0	0.0	0.0	0.0	0.0	0.0	0.0	0.0	0.0
PIAS1	8554	symbol	H. sapiens	8554	H. sapiens	PIAS1	protein inhibitor of activated STAT 1	GO:0033235 positive regulation of protein sumoylation;GO:0033233 regulation of protein sumoylation;GO:0016925 protein sumoylation		Predicted intracellular proteins	Microtubules (Approved)		(M140)PID RANBP2 PATHWAY; (M161)PID IFNG PATHWAY; (M91)PID TCPTP PATHWAY	(M5908)HALLMARK ANDROGEN RESPONSE	0.0	1.0	0.0	0.0	0.0	1.0	0.0	0.0	0.0	0.0	0.0	0.0	0.0	0.0	0.0	1.0	0.0	0.0	0.0	0.0
CELF2	10659	symbol	H. sapiens	10659	H. sapiens	CELF2	CUGBP Elav-like family member 2	GO:0006376 mRNA splice site selection;GO:0000381 regulation of alternative mRNA splicing, via spliceosome;GO:0000245 spliceosomal complex assembly		Predicted intracellular proteins	Nucleoplasm (Supported); Additional: Midbody ring;Vesicles			(M5942)HALLMARK UV RESPONSE DN	0.0	0.0	0.0	0.0	0.0	0.0	0.0	0.0	0.0	0.0	0.0	0.0	0.0	0.0	0.0	0.0	0.0	0.0	1.0	0.0
ARL2BP	23568	symbol	H. sapiens	23568	H. sapiens	ARL2BP	ADP ribosylation factor like GTPase 2 binding protein	GO:0051457 maintenance of protein location in nucleus;GO:0072595 maintenance of protein localization in organelle;GO:0032507 maintenance of protein location in cell		Human disease related genes:Nervous system diseases:Eye disease; Predicted intracellular proteins; Disease related genes	Cytosol;Nucleoplasm (Supported)			(M5945)HALLMARK HEME METABOLISM	0.0	0.0	0.0	0.0	0.0	0.0	0.0	0.0	0.0	0.0	0.0	0.0	0.0	0.0	0.0	0.0	0.0	0.0	0.0	0.0
CTSZ	1522	symbol	H. sapiens	1522	H. sapiens	CTSZ	cathepsin Z	GO:0010757 negative regulation of plasminogen activation;GO:0002002 regulation of angiotensin levels in blood;GO:0002003 angiotensin maturation		Enzymes; ENZYME proteins:Hydrolases; Predicted intracellular proteins; Peptidases:Cysteine-type peptidases	Vesicles (Supported)		(M3468)NABA ECM REGULATORS; (M5885)NABA MATRISOME ASSOCIATED; (M5889)NABA MATRISOME	(M5947)HALLMARK IL2 STAT5 SIGNALING	0.0	0.0	0.0	0.0	1.0	0.0	0.0	0.0	0.0	0.0	0.0	0.0	0.0	0.0	0.0	1.0	0.0	1.0	1.0	0.0
BRINP1	1620	symbol	H. sapiens	1620	H. sapiens	BRINP1	BMP/retinoic acid inducible neural specific 1	GO:0042711 maternal behavior;GO:0007614 short-term memory;GO:0060746 parental behavior		Transporters:Transporter channels and pores; Predicted intracellular proteins	Microtubules (Uncertain)				0.0	0.0	0.0	0.0	0.0	0.0	0.0	0.0	0.0	0.0	0.0	0.0	0.0	0.0	0.0	0.0	0.0	0.0	0.0	0.0
SRGAP2	23380	symbol	H. sapiens	23380	H. sapiens	SRGAP2	SLIT-ROBO Rho GTPase activating protein 2	GO:0003363 lamellipodium assembly involved in ameboidal cell migration;GO:0021816 extension of a leading process involved in cell motility in cerebral cortex radial glia guided migration;GO:0031269 pseudopodium assembly		Predicted intracellular proteins; Disease related genes	Cytosol (Approved); Additional: Nucleoplasm				0.0	0.0	0.0	0.0	0.0	0.0	0.0	0.0	0.0	0.0	0.0	1.0	0.0	0.0	0.0	1.0	1.0	0.0	0.0	0.0
SGMS1	259230	symbol	H. sapiens	259230	H. sapiens	SGMS1	sphingomyelin synthase 1	GO:0006686 sphingomyelin biosynthetic process;GO:0006684 sphingomyelin metabolic process;GO:0046513 ceramide biosynthetic process		Enzymes; Predicted intracellular proteins; ENZYME proteins:Transferases	Nucleoplasm (Approved); Additional: Cytosol;Golgi apparatus;Nucleoli fibrillar center		(M143)PID IL2 PI3K PATHWAY	(M5910)HALLMARK PROTEIN SECRETION	0.0	0.0	0.0	0.0	0.0	1.0	0.0	0.0	0.0	0.0	0.0	0.0	0.0	0.0	0.0	0.0	0.0	0.0	0.0	0.0
GPX7	2882	symbol	H. sapiens	2882	H. sapiens	GPX7	glutathione peroxidase 7	GO:0098869 cellular oxidant detoxification;GO:1990748 cellular detoxification;GO:0097237 cellular response to toxic substance		ENZYME proteins:Oxidoreductases; Predicted secreted proteins; Disease related genes; Potential drug targets; Enzymes		Glutathione		(M5930)HALLMARK EPITHELIAL MESENCHYMAL TRANSITION	0.0	0.0	0.0	0.0	0.0	0.0	0.0	0.0	0.0	1.0	0.0	0.0	0.0	0.0	0.0	0.0	0.0	0.0	0.0	0.0
FUT8	2530	symbol	H. sapiens	2530	H. sapiens	FUT8	fucosyltransferase 8	GO:0033578 protein glycosylation in Golgi;GO:0036071 N-glycan fucosylation;GO:0046368 GDP-L-fucose metabolic process		Human disease related genes:Congenital disorders of metabolism:Congenital disorders of carbohydrate metabolism; Disease related genes; Potential drug targets; Enzymes; Predicted intracellular proteins; ENZYME proteins:Transferases	Golgi apparatus (Approved); Additional: Cytosol;Nucleoplasm			(M5937)HALLMARK GLYCOLYSIS	0.0	0.0	0.0	0.0	0.0	0.0	0.0	1.0	0.0	0.0	0.0	0.0	1.0	0.0	0.0	0.0	0.0	0.0	0.0	0.0
CALU	813	symbol	H. sapiens	813	H. sapiens	CALU	calumenin	GO:0008150 biological_process		Predicted intracellular proteins	Endoplasmic reticulum (Supported)			(M5930)HALLMARK EPITHELIAL MESENCHYMAL TRANSITION	0.0	0.0	0.0	0.0	0.0	0.0	1.0	0.0	0.0	1.0	0.0	0.0	0.0	0.0	0.0	0.0	0.0	0.0	0.0	0.0
GGNBP2	79893	symbol	H. sapiens	79893	H. sapiens	GGNBP2	gametogenetin binding protein 2	GO:0033140 negative regulation of peptidyl-serine phosphorylation of STAT protein;GO:0042532 negative regulation of tyrosine phosphorylation of STAT protein;GO:0060716 labyrinthine layer blood vessel development		Predicted intracellular proteins	Endoplasmic reticulum (Approved)				0.0	0.0	0.0	0.0	1.0	0.0	0.0	0.0	0.0	0.0	0.0	0.0	0.0	0.0	0.0	0.0	0.0	0.0	0.0	0.0
ANTXR1	84168	symbol	H. sapiens	84168	H. sapiens	ANTXR1	ANTXR cell adhesion molecule 1	GO:1901202 negative regulation of extracellular matrix assembly;GO:1905050 positive regulation of metallopeptidase activity;GO:1903054 negative regulation of extracellular matrix organization		Human disease related genes:Cardiovascular diseases:Vascular diseases; Predicted intracellular proteins; Disease related genes	Vesicles (Uncertain)	MDX-1303	(M267)PID ANTHRAX PATHWAY		0.0	0.0	0.0	0.0	1.0	1.0	0.0	0.0	0.0	0.0	0.0	0.0	0.0	0.0	0.0	1.0	1.0	0.0	0.0	0.0
HUNK	30811	symbol	H. sapiens	30811	H. sapiens	HUNK	hormonally up-regulated Neu-associated kinase	GO:0006468 protein phosphorylation;GO:0016310 phosphorylation;GO:0035556 intracellular signal transduction	CAMK Ser/Thr protein kinase family	Enzymes; Kinases:CAMK Ser/Thr protein kinases; Predicted intracellular proteins; ENZYME proteins:Transferases	Nucleoplasm;Plasma membrane (Approved)				0.0	0.0	0.0	0.0	0.0	0.0	0.0	0.0	0.0	0.0	0.0	0.0	0.0	0.0	0.0	0.0	0.0	0.0	0.0	0.0
DYNC1I1	1780	symbol	H. sapiens	1780	H. sapiens	DYNC1I1	dynein cytoplasmic 1 intermediate chain 1	GO:0047496 vesicle transport along microtubule;GO:0099518 vesicle cytoskeletal trafficking;GO:0072384 organelle transport along microtubule		Predicted intracellular proteins					0.0	0.0	0.0	0.0	0.0	1.0	0.0	0.0	0.0	0.0	0.0	0.0	0.0	0.0	0.0	0.0	0.0	0.0	0.0	0.0
GLIPR1	11010	symbol	H. sapiens	11010	H. sapiens	GLIPR1	GLI pathogenesis related 1			Transporters:Accessory Factors Involved in Transport; Predicted intracellular proteins		SOT-107		(M5930)HALLMARK EPITHELIAL MESENCHYMAL TRANSITION	0.0	0.0	0.0	0.0	0.0	0.0	0.0	0.0	0.0	0.0	0.0	0.0	0.0	0.0	0.0	0.0	0.0	1.0	0.0	0.0
MCOLN3	55283	symbol	H. sapiens	55283	H. sapiens	MCOLN3	mucolipin TRP cation channel 3	GO:0042491 inner ear auditory receptor cell differentiation;GO:0035315 hair cell differentiation;GO:0051209 release of sequestered calcium ion into cytosol		Transporters:Transporter channels and pores; Voltage-gated ion channels:Transient Receptor Potential Channels	Cytosol;Nucleoli (Approved)				0.0	0.0	0.0	0.0	0.0	0.0	0.0	0.0	0.0	0.0	0.0	0.0	0.0	0.0	0.0	0.0	0.0	0.0	0.0	0.0
DRAM2	128338	symbol	H. sapiens	128338	H. sapiens	DRAM2	DNA damage regulated autophagy modulator 2	GO:0045494 photoreceptor cell maintenance;GO:0001895 retina homeostasis;GO:0007601 visual perception		Potential drug targets; Human disease related genes:Nervous system diseases:Eye disease; Disease related genes; Transporters:Accessory Factors Involved in Transport	Golgi apparatus;Vesicles (Enhanced)			(M5905)HALLMARK ADIPOGENESIS	0.0	0.0	0.0	0.0	0.0	0.0	0.0	0.0	0.0	0.0	0.0	0.0	0.0	0.0	0.0	0.0	0.0	0.0	0.0	0.0
RAB14	51552	symbol	H. sapiens	51552	H. sapiens	RAB14	RAB14, member RAS oncogene family	GO:0090386 phagosome maturation involved in apoptotic cell clearance;GO:0090387 phagolysosome assembly involved in apoptotic cell clearance;GO:0006895 Golgi to endosome transport		Predicted intracellular proteins	Vesicles (Supported)			(M5910)HALLMARK PROTEIN SECRETION	0.0	0.0	0.0	0.0	0.0	0.0	0.0	1.0	0.0	0.0	0.0	0.0	1.0	0.0	0.0	0.0	0.0	1.0	0.0	0.0
CA9	768	symbol	H. sapiens	768	H. sapiens	CA9	carbonic anhydrase 9	GO:0006730 one-carbon metabolic process;GO:0033574 response to testosterone;GO:1901654 response to ketone		FDA approved drug targets:Small molecule drugs; Transporters:Accessory Factors Involved in Transport; ENZYME proteins:Lyases; Enzymes; Predicted intracellular proteins	Plasma membrane (Supported)	Benzthiazide; Hydroflumethiazide; Zonisamide; Girentuximab; Ellagic acid; Sodium carbonate	(M255)PID HIF1 TFPATHWAY		0.0	0.0	0.0	0.0	0.0	0.0	0.0	0.0	0.0	0.0	0.0	0.0	0.0	0.0	0.0	0.0	0.0	0.0	0.0	0.0
CA13	377677	symbol	H. sapiens	377677	H. sapiens	CA13	carbonic anhydrase 13	GO:0006730 one-carbon metabolic process;GO:0044281 small molecule metabolic process;GO:0044237 cellular metabolic process		Enzymes; FDA approved drug targets:Small molecule drugs; ENZYME proteins:Lyases; Predicted intracellular proteins	Nucleoli (Approved); Additional: Nucleoplasm;Vesicles	Zonisamide; N-(4-chlorobenzyl)-N-methylbenzene-1,4-disulfonamide			0.0	0.0	0.0	0.0	0.0	0.0	0.0	0.0	0.0	0.0	0.0	0.0	0.0	0.0	0.0	0.0	0.0	0.0	0.0	0.0
TTC7A	57217	symbol	H. sapiens	57217	H. sapiens	TTC7A	tetratricopeptide repeat domain 7A	GO:0006879 cellular iron ion homeostasis;GO:0046854 phosphatidylinositol phosphate biosynthetic process;GO:0055072 iron ion homeostasis		Human disease related genes:Congenital malformations:Congenital malformations of the digestive system; Predicted intracellular proteins; Disease related genes					0.0	0.0	0.0	0.0	0.0	0.0	0.0	0.0	0.0	0.0	0.0	0.0	0.0	0.0	0.0	0.0	0.0	0.0	0.0	0.0
ZNF385D	79750	symbol	H. sapiens	79750	H. sapiens	ZNF385D	zinc finger protein 385D			Predicted intracellular proteins					0.0	0.0	0.0	0.0	0.0	0.0	0.0	0.0	0.0	0.0	0.0	0.0	0.0	0.0	0.0	0.0	0.0	0.0	0.0	0.0
PHACTR3	116154	symbol	H. sapiens	116154	H. sapiens	PHACTR3	phosphatase and actin regulator 3	GO:0030036 actin cytoskeleton organization;GO:0030029 actin filament-based process;GO:0043086 negative regulation of catalytic activity		Predicted intracellular proteins	Nucleoplasm (Enhanced)				0.0	0.0	0.0	0.0	0.0	0.0	0.0	0.0	0.0	0.0	0.0	0.0	0.0	0.0	0.0	0.0	1.0	0.0	0.0	0.0
KIAA1644	85352	gene_synonym	H. sapiens	85352	H. sapiens	SHISAL1	shisa like 1				Cytosol;Vesicles (Approved)				0.0	0.0	0.0	0.0	0.0	0.0	0.0	0.0	0.0	0.0	0.0	0.0	0.0	0.0	0.0	0.0	0.0	0.0	0.0	0.0
ZBED6CL	113763	gene_synonym	H. sapiens	113763	H. sapiens	ZBED10P	zinc finger BED-type containing 10, pseudogene			Predicted intracellular proteins	Nuclear membrane (Approved); Additional: Vesicles				0.0	0.0	0.0	0.0	0.0	0.0	0.0	0.0	0.0	0.0	0.0	0.0	0.0	0.0	0.0	0.0	0.0	0.0	0.0	0.0
LRRFIP2	9209	symbol	H. sapiens	9209	H. sapiens	LRRFIP2	LRR binding FLII interacting protein 2	GO:0016055 Wnt signaling pathway;GO:0198738 cell-cell signaling by wnt;GO:1905114 cell surface receptor signaling pathway involved in cell-cell signaling		Predicted intracellular proteins; Transcription factors:Yet undefined DNA-binding domains	Actin filaments;Plasma membrane (Approved)				0.0	0.0	0.0	0.0	0.0	0.0	0.0	0.0	0.0	1.0	0.0	0.0	0.0	0.0	0.0	0.0	0.0	0.0	0.0	0.0
CLK4	57396	symbol	H. sapiens	57396	H. sapiens	CLK4	CDC like kinase 4	GO:0018108 peptidyl-tyrosine phosphorylation;GO:0018212 peptidyl-tyrosine modification;GO:0043484 regulation of RNA splicing	CMGC Ser/Thr protein kinase family	Enzymes; Kinases:CMGC Ser/Thr protein kinases; Predicted intracellular proteins; ENZYME proteins:Transferases	Actin filaments (Approved)	Fostamatinib			0.0	0.0	0.0	0.0	0.0	0.0	0.0	0.0	0.0	0.0	0.0	0.0	0.0	0.0	0.0	0.0	0.0	0.0	0.0	0.0
GAD1	2571	symbol	H. sapiens	2571	H. sapiens	GAD1	glutamate decarboxylase 1	GO:0018352 protein-pyridoxal-5-phosphate linkage;GO:0006540 glutamate decarboxylation to succinate;GO:0006538 glutamate catabolic process		Human disease related genes:Nervous system diseases:Other nervous and sensory system diseases; ENZYME proteins:Lyases; Disease related genes; Potential drug targets; Enzymes; Predicted intracellular proteins	Cytosol;Plasma membrane;Vesicles (Approved)	Pyridoxal phosphate; Glutamic acid		(M5951)HALLMARK SPERMATOGENESIS; (M5934)HALLMARK XENOBIOTIC METABOLISM	0.0	0.0	1.0	0.0	0.0	0.0	0.0	0.0	0.0	0.0	0.0	0.0	0.0	0.0	0.0	0.0	0.0	0.0	0.0	0.0
CDON	50937	symbol	H. sapiens	50937	H. sapiens	CDON	cell adhesion associated, oncogene regulated	GO:0045663 positive regulation of myoblast differentiation;GO:0045661 regulation of myoblast differentiation;GO:0007224 smoothened signaling pathway		Human disease related genes:Congenital malformations:Congenital malformations of the nervous system; Predicted intracellular proteins; Disease related genes			(M211)PID HEDGEHOG 2PATHWAY	(M5942)HALLMARK UV RESPONSE DN	0.0	0.0	0.0	0.0	0.0	0.0	0.0	0.0	0.0	0.0	0.0	0.0	0.0	0.0	0.0	0.0	0.0	0.0	0.0	0.0
FAM107A	11170	symbol	H. sapiens	11170	H. sapiens	FAM107A	family with sequence similarity 107 member A	GO:1900272 negative regulation of long-term synaptic potentiation;GO:0051895 negative regulation of focal adhesion assembly;GO:0150118 negative regulation of cell-substrate junction organization		Predicted intracellular proteins	Nuclear speckles (Supported)				0.0	0.0	0.0	0.0	0.0	0.0	0.0	0.0	1.0	0.0	0.0	0.0	0.0	0.0	1.0	0.0	1.0	0.0	0.0	0.0
SGCD	6444	symbol	H. sapiens	6444	H. sapiens	SGCD	sarcoglycan delta	GO:0060977 coronary vasculature morphogenesis;GO:0086003 cardiac muscle cell contraction;GO:0060976 coronary vasculature development		Human disease related genes:Musculoskeletal diseases:Muscular diseases; Human disease related genes:Cardiovascular diseases:Cardiac diseases; Disease related genes				(M5909)HALLMARK MYOGENESIS; (M5930)HALLMARK EPITHELIAL MESENCHYMAL TRANSITION	0.0	0.0	0.0	0.0	1.0	0.0	0.0	0.0	0.0	0.0	0.0	0.0	0.0	1.0	0.0	0.0	1.0	0.0	1.0	0.0
ACSS3	79611	symbol	H. sapiens	79611	H. sapiens	ACSS3	acyl-CoA synthetase short chain family member 3	GO:0046951 ketone body biosynthetic process;GO:0046950 cellular ketone body metabolic process;GO:1902224 ketone body metabolic process		Enzymes; ENZYME proteins:Ligase	Mitochondria (Supported)				0.0	0.0	0.0	0.0	0.0	0.0	0.0	0.0	0.0	0.0	0.0	0.0	0.0	0.0	0.0	0.0	0.0	0.0	0.0	0.0
RHBDL2	54933	symbol	H. sapiens	54933	H. sapiens	RHBDL2	rhomboid like 2	GO:0006508 proteolysis;GO:0019538 protein metabolic process;GO:1901564 organonitrogen compound metabolic process		Enzymes; ENZYME proteins:Hydrolases; Peptidases:Serine-type peptidases					0.0	0.0	0.0	0.0	0.0	0.0	0.0	0.0	0.0	0.0	0.0	0.0	0.0	0.0	0.0	0.0	0.0	0.0	0.0	0.0
NFATC2IP	84901	symbol	H. sapiens	84901	H. sapiens	NFATC2IP	nuclear factor of activated T cells 2 interacting protein	GO:0001816 cytokine production;GO:0045944 positive regulation of transcription by RNA polymerase II;GO:0045893 positive regulation of transcription, DNA-templated		Predicted intracellular proteins	Nucleoplasm (Approved)				0.0	0.0	0.0	0.0	0.0	0.0	0.0	0.0	0.0	0.0	0.0	0.0	0.0	0.0	0.0	0.0	0.0	0.0	0.0	0.0
FOXJ2	55810	symbol	H. sapiens	55810	H. sapiens	FOXJ2	forkhead box J2	GO:0110059 negative regulation of blood vessel endothelial cell differentiation;GO:0110057 regulation of blood vessel endothelial cell differentiation;GO:0045602 negative regulation of endothelial cell differentiation		Transcription factors:Helix-turn-helix domains; Predicted intracellular proteins	Nucleoplasm (Supported); Additional: Nucleoli fibrillar center			(M5945)HALLMARK HEME METABOLISM	0.0	0.0	0.0	0.0	0.0	0.0	0.0	0.0	0.0	0.0	0.0	0.0	0.0	0.0	0.0	0.0	0.0	0.0	0.0	0.0
RSRP1	57035	symbol	H. sapiens	57035	H. sapiens	RSRP1	arginine and serine rich protein 1			Predicted intracellular proteins	Nucleoplasm (Approved)				0.0	0.0	0.0	0.0	0.0	0.0	0.0	0.0	0.0	0.0	0.0	0.0	0.0	0.0	0.0	0.0	0.0	0.0	0.0	0.0
MAPK13	5603	symbol	H. sapiens	5603	H. sapiens	MAPK13	mitogen-activated protein kinase 13	GO:0072740 cellular response to anisomycin;GO:0072739 response to anisomycin;GO:0072709 cellular response to sorbitol	CMGC Ser/Thr protein kinase family	Enzymes; Kinases:CMGC Ser/Thr protein kinases; Predicted intracellular proteins; ENZYME proteins:Transferases	Cytosol;Nucleoli;Nucleoli rim;Nucleoplasm (Approved)	KC706; Fostamatinib	(M209)PID P38 GAMMA DELTA PATHWAY; (M12705)SIG CD40PATHWAYMAP	(M5907)HALLMARK ESTROGEN RESPONSE LATE; (M5915)HALLMARK APICAL JUNCTION	0.0	0.0	0.0	1.0	0.0	1.0	0.0	0.0	1.0	1.0	0.0	0.0	0.0	0.0	1.0	0.0	0.0	0.0	0.0	0.0
LVCAT1	100506827	gene_synonym	H. sapiens	100506827	H. sapiens	LINC02475	long intergenic non-protein coding RNA 2475								0.0	0.0	0.0	0.0	0.0	0.0	0.0	0.0	0.0	0.0	0.0	0.0	0.0	0.0	0.0	0.0	0.0	0.0	0.0	0.0
GYPE	2996	symbol	H. sapiens	2996	H. sapiens	GYPE	glycophorin E (MNS blood group)							(M5945)HALLMARK HEME METABOLISM	0.0	0.0	0.0	0.0	0.0	0.0	0.0	0.0	0.0	0.0	0.0	0.0	0.0	0.0	0.0	0.0	0.0	0.0	0.0	0.0
TDRD10	126668	symbol	H. sapiens	126668	H. sapiens	TDRD10	tudor domain containing 10	GO:0007314 oocyte anterior/posterior axis specification;GO:0007315 pole plasm assembly;GO:0008358 maternal determination of anterior/posterior axis, embryo		Predicted intracellular proteins; Cancer-related genes:Mutated cancer genes	Vesicles (Approved)				0.0	0.0	0.0	0.0	1.0	0.0	0.0	0.0	0.0	0.0	0.0	0.0	0.0	0.0	0.0	0.0	0.0	0.0	0.0	1.0
USPL1	10208	symbol	H. sapiens	10208	H. sapiens	USPL1	ubiquitin specific peptidase like 1	GO:0030576 Cajal body organization;GO:0016926 protein desumoylation;GO:0009301 snRNA transcription		Enzymes; Predicted intracellular proteins; Peptidases:Cysteine-type peptidases					0.0	0.0	0.0	0.0	0.0	0.0	0.0	0.0	0.0	0.0	0.0	0.0	0.0	0.0	0.0	0.0	0.0	0.0	0.0	0.0
CPN2	1370	symbol	H. sapiens	1370	H. sapiens	CPN2	carboxypeptidase N subunit 2	GO:0050821 protein stabilization;GO:0031647 regulation of protein stability;GO:0050790 regulation of catalytic activity		Predicted secreted proteins		Zinc; ORE-1001; Zinc acetate; Zinc chloride; Zinc sulfate, unspecified form	(M3468)NABA ECM REGULATORS; (M5885)NABA MATRISOME ASSOCIATED; (M5889)NABA MATRISOME		0.0	0.0	0.0	0.0	0.0	0.0	0.0	0.0	0.0	0.0	0.0	0.0	0.0	0.0	0.0	0.0	0.0	0.0	0.0	0.0
TAF1B	9014	symbol	H. sapiens	9014	H. sapiens	TAF1B	TATA-box binding protein associated factor, RNA polymerase I subunit B	GO:0042790 nucleolar large rRNA transcription by RNA polymerase I;GO:0001188 RNA polymerase I preinitiation complex assembly;GO:0006361 transcription initiation from RNA polymerase I promoter		Predicted intracellular proteins	Nucleoli (Supported); Additional: Nucleoplasm				0.0	0.0	0.0	0.0	0.0	0.0	0.0	0.0	0.0	0.0	0.0	0.0	0.0	0.0	0.0	0.0	0.0	0.0	0.0	0.0
STAT6	6778	symbol	H. sapiens	6778	H. sapiens	STAT6	signal transducer and activator of transcription 6	GO:0002296 T-helper 1 cell lineage commitment;GO:0035771 interleukin-4-mediated signaling pathway;GO:0048295 positive regulation of isotype switching to IgE isotypes		Transcription factors:Immunoglobulin fold; Predicted intracellular proteins; Cancer-related genes	Cytosol (Supported); Additional: Nucleoplasm		(M1718)SIG IL4RECEPTOR IN B LYPHOCYTES; (M91)PID TCPTP PATHWAY; (M54)PID IL12 2PATHWAY		0.0	1.0	0.0	1.0	0.0	1.0	0.0	1.0	0.0	1.0	0.0	0.0	0.0	0.0	0.0	0.0	0.0	0.0	0.0	0.0
FEZ2	9637	symbol	H. sapiens	9637	H. sapiens	FEZ2	fasciculation and elongation protein zeta 2	GO:1902902 negative regulation of autophagosome assembly;GO:0016242 negative regulation of macroautophagy;GO:1902116 negative regulation of organelle assembly		Predicted intracellular proteins	Nucleoli;Nucleoli rim (Approved); Additional: Cytosol;Golgi apparatus				0.0	0.0	0.0	0.0	0.0	0.0	0.0	0.0	0.0	0.0	0.0	0.0	0.0	0.0	0.0	0.0	0.0	0.0	0.0	0.0
ZFP3	124961	symbol	H. sapiens	124961	H. sapiens	ZFP3	ZFP3 zinc finger protein	GO:0006357 regulation of transcription by RNA polymerase II;GO:0006355 regulation of transcription, DNA-templated;GO:1903506 regulation of nucleic acid-templated transcription		Predicted intracellular proteins; Transcription factors:Zinc-coordinating DNA-binding domains	Cytosol;Nucleoplasm (Approved)				0.0	0.0	0.0	0.0	0.0	0.0	0.0	0.0	0.0	0.0	0.0	0.0	0.0	0.0	0.0	0.0	0.0	0.0	0.0	0.0
BACE1	23621	symbol	H. sapiens	23621	H. sapiens	BACE1	beta-secretase 1	GO:0034205 amyloid-beta formation;GO:0060134 prepulse inhibition;GO:0071287 cellular response to manganese ion		ENZYME proteins:Hydrolases; Transporters:Accessory Factors Involved in Transport; Peptidases:Aspartic-type peptidases; Enzymes; Predicted intracellular proteins	Plasma membrane (Supported)	MMI-175; CTS-21166; N-[amino(imino)methyl]-2-(2,5-diphenyl-1H-pyrrol-1-yl)acetamide; N-[(5R,14R)-5-AMINO-5,14-DIMETHYL-4-OXO-3-OXA-18-AZATRICYCLO[15.3.1.1~7,11~]DOCOSA-1(21),7(22),8,10,17,19-HEXAEN-19-YL]-N-METHYLMETHANESULFONAMIDE; N-[amino(imino)methyl]-2-[2-(2-chlorophenyl)-4-(4-propoxyphenyl)-3-thienyl]acetamide; 4-(4-FLUOROBENZYL)PIPERIDINE; N-{2-methyl-5-[(6-phenylpyrimidin-4-yl)amino]pheny…			0.0	0.0	1.0	0.0	0.0	0.0	0.0	0.0	0.0	0.0	1.0	0.0	0.0	0.0	0.0	0.0	1.0	0.0	0.0	0.0
TGOLN2	10618	symbol	H. sapiens	10618	H. sapiens	TGOLN2	trans-golgi network protein 2				Golgi apparatus (Enhanced); Additional: Nucleoplasm				0.0	0.0	0.0	0.0	0.0	0.0	0.0	0.0	0.0	0.0	0.0	0.0	0.0	0.0	0.0	0.0	0.0	0.0	0.0	0.0
AGAP11	119385	symbol	H. sapiens	119385	H. sapiens	AGAP11	ArfGAP with GTPase domain, ankyrin repeat and PH domain 11	GO:0050790 regulation of catalytic activity;GO:0065009 regulation of molecular function;GO:0065007 biological regulation							0.0	0.0	0.0	0.0	0.0	0.0	0.0	0.0	0.0	0.0	0.0	0.0	0.0	0.0	0.0	0.0	0.0	0.0	0.0	0.0
PDE8B	8622	symbol	H. sapiens	8622	H. sapiens	PDE8B	phosphodiesterase 8B	GO:0006198 cAMP catabolic process;GO:0009214 cyclic nucleotide catabolic process;GO:0046058 cAMP metabolic process		ENZYME proteins:Hydrolases; Predicted intracellular proteins; Human disease related genes:Endocrine and metabolic diseases:Adrenal gland diseases; Disease related genes; Enzymes; Human disease related genes:Nervous system diseases:Neurodegenerative diseases	Cytosol;Nucleoplasm (Approved)				0.0	0.0	0.0	0.0	0.0	0.0	0.0	0.0	0.0	0.0	0.0	0.0	0.0	0.0	0.0	0.0	0.0	0.0	0.0	0.0
CADM3	57863	symbol	H. sapiens	57863	H. sapiens	CADM3	cell adhesion molecule 3	GO:0007157 heterophilic cell-cell adhesion via plasma membrane cell adhesion molecules;GO:0007156 homophilic cell adhesion via plasma membrane adhesion molecules;GO:0098742 cell-cell adhesion via plasma-membrane adhesion molecules		Predicted intracellular proteins				(M5915)HALLMARK APICAL JUNCTION	0.0	0.0	0.0	0.0	0.0	0.0	0.0	0.0	0.0	0.0	0.0	0.0	0.0	0.0	0.0	0.0	0.0	0.0	0.0	0.0
ADAM10	102	symbol	H. sapiens	102	H. sapiens	ADAM10	ADAM metallopeptidase domain 10	GO:0051089 constitutive protein ectodomain proteolysis;GO:0098696 regulation of neurotransmitter receptor localization to postsynaptic specialization membrane;GO:0042117 monocyte activation		CD markers; ENZYME proteins:Hydrolases; Transporters:Accessory Factors Involved in Transport; Cancer-related genes:Mutational cancer driver genes; Disease related genes; Potential drug targets; Enzymes; Predicted intracellular proteins	Plasma membrane;Vesicles (Supported)	XL784	(M70)PID PS1 PATHWAY; (M142)PID AJDISS 2PATHWAY; (M17)PID NOTCH PATHWAY	(M5916)HALLMARK APICAL SURFACE; (M5910)HALLMARK PROTEIN SECRETION	0.0	0.0	0.0	1.0	0.0	1.0	0.0	0.0	0.0	1.0	0.0	0.0	0.0	0.0	1.0	0.0	0.0	1.0	0.0	0.0
ZNF596	169270	symbol	H. sapiens	169270	H. sapiens	ZNF596	zinc finger protein 596	GO:0000122 negative regulation of transcription by RNA polymerase II;GO:0045892 negative regulation of transcription, DNA-templated;GO:1903507 negative regulation of nucleic acid-templated transcription		Predicted intracellular proteins; Transcription factors:Zinc-coordinating DNA-binding domains	Mitochondria;Nucleoli (Approved)				0.0	0.0	0.0	0.0	0.0	0.0	0.0	0.0	0.0	0.0	0.0	0.0	0.0	0.0	0.0	0.0	0.0	0.0	0.0	0.0
NAT1	9	symbol	H. sapiens	9	H. sapiens	NAT1	N-acetyltransferase 1	GO:0006805 xenobiotic metabolic process;GO:0071466 cellular response to xenobiotic stimulus;GO:0009410 response to xenobiotic stimulus		Enzymes; Predicted intracellular proteins; ENZYME proteins:Transferases				(M5941)HALLMARK UV RESPONSE UP	0.0	0.0	0.0	0.0	0.0	0.0	0.0	0.0	0.0	0.0	0.0	0.0	0.0	0.0	0.0	0.0	0.0	0.0	0.0	0.0
RBM47	54502	symbol	H. sapiens	54502	H. sapiens	RBM47	RNA binding motif protein 47	GO:0016554 cytidine to uridine editing;GO:0016553 base conversion or substitution editing;GO:0002244 hematopoietic progenitor cell differentiation		Predicted intracellular proteins	Cytosol;Nucleoplasm (Approved)				0.0	0.0	0.0	0.0	0.0	0.0	0.0	0.0	0.0	0.0	0.0	0.0	0.0	0.0	0.0	0.0	0.0	0.0	0.0	0.0
ZMYND12	84217	symbol	H. sapiens	84217	H. sapiens	ZMYND12	zinc finger MYND-type containing 12			Predicted intracellular proteins					0.0	0.0	0.0	0.0	0.0	0.0	0.0	0.0	0.0	0.0	0.0	0.0	0.0	0.0	0.0	0.0	0.0	0.0	0.0	0.0
MAPK1	5594	symbol	H. sapiens	5594	H. sapiens	MAPK1	mitogen-activated protein kinase 1	GO:0019858 cytosine metabolic process;GO:0090170 regulation of Golgi inheritance;GO:0072584 caveolin-mediated endocytosis	CMGC Ser/Thr protein kinase family	FDA approved drug targets:Small molecule drugs; Cancer-related genes:Candidate cancer biomarkers; Human disease related genes:Congenital malformations:Other congenital malformations; Kinases:CMGC Ser/Thr protein kinases; Enzymes; RAS pathway related proteins; Predicted intracellular proteins; ENZYME proteins:Transferases	Cytosol (Supported); Additional: Nuclear speckles	Acetylsalicylic acid; Minocycline; Isoprenaline; Arsenic trioxide; Olomoucine; Phosphonothreonine; Purvalanol; SB220025; Seliciclib; Perifosine; N,N-DIMETHYL-4-(4-PHENYL-1H-PYRAZOL-3-YL)-1H-PYRROLE-2-CARBOXAMIDE; N-BENZYL-4-[4-(3-CHLOROPHENYL)-1H-PYRAZOL-3-YL]-1H-PYRROLE-2-CARBOXAMIDE; (S)-N-(1-(3-CHLORO-4-FLUOROPHENYL)-2-HYDROXYETHYL)-4-(4-(3-CHLOROPHENYL)-1H-PYRAZOL-3-YL)-1H-PYRROLE-2-CARBOXAMI…	(M64)PID S1P S1P4 PATHWAY; (M134)PID TCR RAS PATHWAY; (M120)PID ARF6 DOWNSTREAM PATHWAY	(M5910)HALLMARK PROTEIN SECRETION; (M5923)HALLMARK PI3K AKT MTOR SIGNALING	0.0	1.0	0.0	1.0	1.0	1.0	1.0	1.0	1.0	1.0	1.0	0.0	1.0	1.0	1.0	0.0	0.0	1.0	0.0	0.0
RFX8	731220	symbol	H. sapiens	731220	H. sapiens	RFX8	regulatory factor X8	GO:0006357 regulation of transcription by RNA polymerase II;GO:0006355 regulation of transcription, DNA-templated;GO:1903506 regulation of nucleic acid-templated transcription		Transcription factors:Helix-turn-helix domains; Predicted intracellular proteins	Nucleoplasm (Approved); Additional: Nuclear bodies				0.0	0.0	0.0	0.0	0.0	0.0	0.0	0.0	0.0	0.0	0.0	0.0	0.0	0.0	0.0	0.0	0.0	0.0	0.0	0.0
MMP2	4313	symbol	H. sapiens	4313	H. sapiens	MMP2	matrix metallopeptidase 2	GO:0014012 peripheral nervous system axon regeneration;GO:0001957 intramembranous ossification;GO:0036072 direct ossification		Candidate cardiovascular disease genes; Cancer-related genes:Candidate cancer biomarkers; ENZYME proteins:Hydrolases; Predicted secreted proteins; Human disease related genes:Cancers:Cancers of male genital organs; Cancer-related genes:Mutational cancer driver genes; Peptidases:Metallopeptidases; Human disease related genes:Cancers:Cancers of the breast and female genital organs; Human disease re…	Vesicles (Approved)	Marimastat; Captopril; SC-74020; Halofuginone; AE-941; Endostatin	(M63)PID AVB3 OPN PATHWAY; (M240)PID SYNDECAN 2 PATHWAY; (M65)PID FRA PATHWAY	(M5946)HALLMARK COAGULATION; (M5902)HALLMARK APOPTOSIS; (M5915)HALLMARK APICAL JUNCTION	0.0	1.0	0.0	0.0	1.0	1.0	0.0	1.0	0.0	1.0	0.0	0.0	0.0	0.0	1.0	0.0	0.0	0.0	1.0	1.0
SYNJ1	8867	symbol	H. sapiens	8867	H. sapiens	SYNJ1	synaptojanin 1	GO:1904980 positive regulation of endosome organization;GO:1904978 regulation of endosome organization;GO:0016191 synaptic vesicle uncoating		Human disease related genes:Nervous system diseases:Epilepsy; ENZYME proteins:Hydrolases; Predicted intracellular proteins; Disease related genes; Potential drug targets; Enzymes; Human disease related genes:Nervous system diseases:Neurodegenerative diseases	Cytosol;Nucleoplasm (Approved); Additional: Centrosome		(M62)PID EPHB FWD PATHWAY; (M214)PID ERBB1 INTERNALIZATION PATHWAY	(M5945)HALLMARK HEME METABOLISM	0.0	0.0	1.0	1.0	0.0	0.0	0.0	0.0	0.0	1.0	1.0	0.0	0.0	0.0	0.0	0.0	0.0	0.0	0.0	0.0
CCDC69	26112	symbol	H. sapiens	26112	H. sapiens	CCDC69	coiled-coil domain containing 69	GO:0051255 spindle midzone assembly;GO:0051225 spindle assembly;GO:0007051 spindle organization		Predicted intracellular proteins	Plasma membrane (Approved); Additional: Actin filaments;Golgi apparatus				0.0	0.0	0.0	0.0	0.0	0.0	0.0	0.0	0.0	0.0	0.0	0.0	0.0	0.0	0.0	0.0	0.0	0.0	0.0	0.0
VPS54	51542	symbol	H. sapiens	51542	H. sapiens	VPS54	VPS54 subunit of GARP complex	GO:0060052 neurofilament cytoskeleton organization;GO:0006896 Golgi to vacuole transport;GO:0048873 homeostasis of number of cells within a tissue		Predicted intracellular proteins	Golgi apparatus (Enhanced); Additional: Nucleoplasm				0.0	0.0	0.0	0.0	0.0	0.0	0.0	0.0	0.0	0.0	0.0	0.0	0.0	0.0	0.0	0.0	0.0	0.0	0.0	0.0
IL13RA2	3598	symbol	H. sapiens	3598	H. sapiens	IL13RA2	interleukin 13 receptor subunit alpha 2	GO:0043305 negative regulation of mast cell degranulation;GO:0033007 negative regulation of mast cell activation involved in immune response;GO:0002638 negative regulation of immunoglobulin production		CD markers; Cancer-related genes:Candidate cancer biomarkers	Cell Junctions;Plasma membrane (Approved); Additional: Nucleoplasm;Vesicles	AER001	(M28)PID IL4 2PATHWAY	(M5951)HALLMARK SPERMATOGENESIS	1.0	1.0	0.0	0.0	0.0	0.0	0.0	0.0	0.0	0.0	1.0	0.0	0.0	0.0	0.0	0.0	0.0	0.0	0.0	0.0
PMP22	5376	symbol	H. sapiens	5376	H. sapiens	PMP22	peripheral myelin protein 22	GO:0032060 bleb assembly;GO:0032288 myelin assembly;GO:0007422 peripheral nervous system development		Human disease related genes:Nervous system diseases:Other nervous and sensory system diseases; Cancer-related genes:Candidate cancer biomarkers; Predicted intracellular proteins; Disease related genes; Potential drug targets; Transporters:Transporter channels and pores; Human disease related genes:Nervous system diseases:Neurodegenerative diseases			(M239)PID A6B1 A6B4 INTEGRIN PATHWAY	(M5942)HALLMARK UV RESPONSE DN; (M5930)HALLMARK EPITHELIAL MESENCHYMAL TRANSITION	0.0	0.0	0.0	0.0	0.0	0.0	0.0	0.0	0.0	0.0	0.0	1.0	0.0	0.0	0.0	0.0	0.0	0.0	0.0	0.0
ARFGEF1	10565	symbol	H. sapiens	10565	H. sapiens	ARFGEF1	ADP ribosylation factor guanine nucleotide exchange factor 1	GO:0090284 positive regulation of protein glycosylation in Golgi;GO:0090283 regulation of protein glycosylation in Golgi;GO:0060050 positive regulation of protein glycosylation		Predicted intracellular proteins	Golgi apparatus (Enhanced); Additional: Cytosol;Nucleoplasm			(M5910)HALLMARK PROTEIN SECRETION; (M5893)HALLMARK MITOTIC SPINDLE	0.0	0.0	0.0	0.0	0.0	0.0	0.0	0.0	0.0	0.0	0.0	0.0	0.0	0.0	0.0	0.0	0.0	0.0	0.0	0.0
TOB1	10140	symbol	H. sapiens	10140	H. sapiens	TOB1	transducer of ERBB2, 1	GO:0060212 negative regulation of nuclear-transcribed mRNA poly(A) tail shortening;GO:1900152 negative regulation of nuclear-transcribed mRNA catabolic process, deadenylation-dependent decay;GO:0060213 positive regulation of nuclear-transcribed mRNA poly(A) tail shortening		Predicted intracellular proteins	Nucleoplasm (Approved); Additional: Vesicles			(M5905)HALLMARK ADIPOGENESIS; (M5906)HALLMARK ESTROGEN RESPONSE EARLY; (M5907)HALLMARK ESTROGEN RESPONSE LATE	0.0	0.0	0.0	0.0	0.0	0.0	0.0	0.0	0.0	0.0	0.0	0.0	0.0	0.0	0.0	0.0	0.0	0.0	0.0	0.0
PPL	5493	symbol	H. sapiens	5493	H. sapiens	PPL	periplakin	GO:0031424 keratinization;GO:0045104 intermediate filament cytoskeleton organization;GO:0045103 intermediate filament-based process		Predicted intracellular proteins	Plasma membrane (Approved); Additional: Cytosol;Nucleoplasm				0.0	0.0	0.0	0.0	0.0	0.0	0.0	0.0	0.0	0.0	0.0	0.0	0.0	0.0	0.0	0.0	0.0	0.0	0.0	0.0
TNFAIP2	7127	symbol	H. sapiens	7127	H. sapiens	TNFAIP2	TNF alpha induced protein 2	GO:0051601 exocyst localization;GO:0031503 protein-containing complex localization;GO:0006887 exocytosis		Transporters:Transporter channels and pores; Predicted intracellular proteins; Cancer-related genes:Candidate cancer biomarkers	Cytosol;Golgi apparatus (Approved); Additional: Nuclear membrane;Nucleoplasm			(M5890)HALLMARK TNFA SIGNALING VIA NFKB; (M5913)HALLMARK INTERFERON GAMMA RESPONSE	0.0	0.0	0.0	0.0	1.0	0.0	0.0	0.0	0.0	0.0	0.0	0.0	0.0	0.0	0.0	0.0	0.0	0.0	0.0	0.0
C4orf3	401152	symbol	H. sapiens	401152	H. sapiens	C4orf3	chromosome 4 open reading frame 3	GO:1901876 regulation of calcium ion binding;GO:1901877 negative regulation of calcium ion binding;GO:1901895 negative regulation of ATPase-coupled calcium transmembrane transporter activity		Transporters:Transporter channels and pores	Endoplasmic reticulum (Approved)				1.0	0.0	0.0	0.0	0.0	0.0	0.0	0.0	0.0	0.0	0.0	0.0	0.0	0.0	0.0	0.0	0.0	0.0	0.0	0.0
HTRA1	5654	symbol	H. sapiens	5654	H. sapiens	HTRA1	HtrA serine peptidase 1	GO:0060718 chorionic trophoblast cell differentiation;GO:0097187 dentinogenesis;GO:0060717 chorion development		Human disease related genes:Congenital malformations:Congenital malformations of the nervous system; Predicted secreted proteins; Human disease related genes:Nervous system diseases:Eye disease; Disease related genes; Potential drug targets; Enzymes; Predicted intracellular proteins; Peptidases:Serine-type peptidases	Plasma membrane (Supported)		(M3468)NABA ECM REGULATORS; (M5885)NABA MATRISOME ASSOCIATED; (M5889)NABA MATRISOME	(M5946)HALLMARK COAGULATION; (M5930)HALLMARK EPITHELIAL MESENCHYMAL TRANSITION	0.0	0.0	0.0	0.0	0.0	0.0	0.0	0.0	0.0	1.0	0.0	0.0	0.0	0.0	0.0	0.0	0.0	0.0	0.0	0.0
SNX3	8724	symbol	H. sapiens	8724	H. sapiens	SNX3	sorting nexin 3	GO:0070676 intralumenal vesicle formation;GO:2000642 negative regulation of early endosome to late endosome transport;GO:1903650 negative regulation of cytoplasmic transport		Transporters; Predicted intracellular proteins; Disease related genes; Potential drug targets		S,S-(2-Hydroxyethyl)Thiocysteine			1.0	0.0	0.0	0.0	0.0	0.0	0.0	0.0	0.0	0.0	1.0	0.0	0.0	0.0	0.0	0.0	0.0	0.0	0.0	0.0
PBX1	5087	symbol	H. sapiens	5087	H. sapiens	PBX1	PBX homeobox 1	GO:0001779 natural killer cell differentiation;GO:0035162 embryonic hemopoiesis;GO:0030325 adrenal gland development		Transcription factors:Helix-turn-helix domains; Human disease related genes:Cancers:Cancers of haematopoietic and lymphoid tissues; Human disease related genes:Congenital malformations:Congenital malformations of the urinary system; Disease related genes; Predicted intracellular proteins; Cancer-related genes	Nucleoplasm (Enhanced); Additional: Cytosol;Nuclear bodies		(M115)PID REG GR PATHWAY		0.0	0.0	0.0	0.0	1.0	0.0	0.0	0.0	0.0	0.0	0.0	0.0	0.0	0.0	0.0	0.0	0.0	0.0	0.0	1.0
ZFP91	80829	symbol	H. sapiens	80829	H. sapiens	ZFP91	ZFP91 zinc finger protein, atypical E3 ubiquitin ligase	GO:0007250 activation of NF-kappaB-inducing kinase activity;GO:0038061 NIK/NF-kappaB signaling;GO:0070534 protein K63-linked ubiquitination		Enzymes; Transcription factors:Zinc-coordinating DNA-binding domains; Predicted intracellular proteins; ENZYME proteins:Transferases	Nucleoli;Nucleoplasm (Supported)		(M5883)NABA SECRETED FACTORS; (M5885)NABA MATRISOME ASSOCIATED; (M5889)NABA MATRISOME		0.0	0.0	0.0	0.0	0.0	0.0	0.0	0.0	0.0	0.0	0.0	0.0	0.0	0.0	0.0	0.0	0.0	0.0	0.0	0.0
KIAA0430	9665	gene_synonym	H. sapiens	9665	H. sapiens	MARF1	meiosis regulator and mRNA stability factor 1	GO:0007143 female meiotic nuclear division;GO:0048477 oogenesis;GO:0007292 female gamete generation		Predicted intracellular proteins	Golgi apparatus;Vesicles (Approved)				0.0	0.0	0.0	0.0	0.0	0.0	0.0	0.0	0.0	0.0	0.0	0.0	0.0	0.0	0.0	0.0	0.0	0.0	0.0	0.0
APOL1	8542	symbol	H. sapiens	8542	H. sapiens	APOL1	apolipoprotein L1	GO:0051838 cytolysis by host of symbiont cells;GO:0051873 killing by host of symbiont cells;GO:1902476 chloride transmembrane transport		Candidate cardiovascular disease genes; Predicted secreted proteins; Disease related genes; Potential drug targets; Human disease related genes:Urinary system diseases:Kidney diseases; Transporters:Transporter channels and pores		Zinc; Zinc acetate; Zinc chloride; Zinc sulfate, unspecified form			0.0	0.0	0.0	0.0	0.0	0.0	0.0	0.0	0.0	0.0	0.0	0.0	0.0	0.0	0.0	0.0	0.0	0.0	0.0	0.0
APH1B	83464	symbol	H. sapiens	83464	H. sapiens	APH1B	aph-1 homolog B, gamma-secretase subunit	GO:0034205 amyloid-beta formation;GO:0007220 Notch receptor processing;GO:0042987 amyloid precursor protein catabolic process		Transporters:Transporter channels and pores			(M251)PID SYNDECAN 3 PATHWAY; (M70)PID PS1 PATHWAY; (M17)PID NOTCH PATHWAY		0.0	0.0	0.0	1.0	0.0	0.0	0.0	0.0	0.0	0.0	0.0	0.0	0.0	0.0	0.0	1.0	0.0	0.0	0.0	0.0
EFCAB14	9813	symbol	H. sapiens	9813	H. sapiens	EFCAB14	EF-hand calcium binding domain 14				Cytosol (Approved); Additional: Golgi apparatus;Nucleoli				0.0	0.0	0.0	0.0	0.0	0.0	0.0	0.0	0.0	0.0	0.0	0.0	0.0	0.0	0.0	0.0	0.0	0.0	0.0	0.0
8-Sep						None	None	None	None	None	None	None	None	None	nan	nan	nan	nan	nan	nan	nan	nan	nan	nan	nan	nan	nan	nan	nan	nan	nan	nan	nan	nan
RECK	8434	symbol	H. sapiens	8434	H. sapiens	RECK	reversion inducing cysteine rich protein with kazal motifs	GO:0090210 regulation of establishment of blood-brain barrier;GO:0001955 blood vessel maturation;GO:1904684 negative regulation of metalloendopeptidase activity			Plasma membrane (Supported)				0.0	0.0	0.0	0.0	1.0	0.0	0.0	0.0	0.0	0.0	0.0	0.0	0.0	0.0	0.0	1.0	0.0	0.0	1.0	0.0
TAB2	23118	symbol	H. sapiens	23118	H. sapiens	TAB2	TGF-beta activated kinase 1 (MAP3K7) binding protein 2	GO:0010507 negative regulation of autophagy;GO:0043123 positive regulation of I-kappaB kinase/NF-kappaB signaling;GO:0043122 regulation of I-kappaB kinase/NF-kappaB signaling		Human disease related genes:Congenital malformations:Congenital malformations of the circulatory system; Predicted intracellular proteins; Disease related genes			(M20)PID P38 MKK3 6PATHWAY; (M23)PID WNT NONCANONICAL PATHWAY; (M110)PID IL1 PATHWAY		0.0	1.0	0.0	1.0	0.0	1.0	0.0	0.0	0.0	0.0	0.0	0.0	0.0	0.0	0.0	0.0	0.0	0.0	0.0	0.0
ITGB8	3696	symbol	H. sapiens	3696	H. sapiens	ITGB8	integrin subunit beta 8	GO:0061520 Langerhans cell differentiation;GO:0060022 hard palate development;GO:1901388 regulation of transforming growth factor beta activation		Cancer-related genes:Candidate cancer biomarkers	Cytosol;Plasma membrane (Approved)		(M212)PID INTEGRIN5 PATHWAY; (M47)PID INTEGRIN CS PATHWAY	(M5932)HALLMARK INFLAMMATORY RESPONSE	0.0	0.0	0.0	1.0	1.0	0.0	0.0	1.0	0.0	0.0	0.0	0.0	1.0	1.0	0.0	0.0	0.0	0.0	0.0	1.0
RNF185	91445	symbol	H. sapiens	91445	H. sapiens	RNF185	ring finger protein 185	GO:0044314 protein K27-linked ubiquitination;GO:0071712 ER-associated misfolded protein catabolic process;GO:1904294 positive regulation of ERAD pathway		Enzymes; Predicted intracellular proteins; ENZYME proteins:Transferases					0.0	0.0	0.0	0.0	0.0	0.0	0.0	0.0	0.0	0.0	0.0	0.0	0.0	0.0	1.0	1.0	0.0	0.0	0.0	0.0
SMOC1	64093	symbol	H. sapiens	64093	H. sapiens	SMOC1	SPARC related modular calcium binding 1	GO:0045667 regulation of osteoblast differentiation;GO:0048736 appendage development;GO:0060173 limb development		Human disease related genes:Congenital malformations:Other congenital malformations; Predicted secreted proteins; Disease related genes	Plasma membrane (Approved)		(M3008)NABA ECM GLYCOPROTEINS; (M5884)NABA CORE MATRISOME; (M5889)NABA MATRISOME		0.0	0.0	0.0	0.0	0.0	0.0	0.0	0.0	0.0	0.0	0.0	0.0	0.0	0.0	0.0	0.0	0.0	0.0	0.0	0.0
GLTSCR1L	23506	gene_synonym	H. sapiens	23506	H. sapiens	BICRAL	BICRA like chromatin remodeling complex associated protein	GO:0045893 positive regulation of transcription, DNA-templated;GO:1903508 positive regulation of nucleic acid-templated transcription;GO:1902680 positive regulation of RNA biosynthetic process		Predicted intracellular proteins	Nucleoplasm (Supported)				0.0	0.0	0.0	0.0	0.0	0.0	0.0	0.0	0.0	0.0	0.0	0.0	0.0	0.0	0.0	0.0	0.0	0.0	0.0	0.0
HSPB7	27129	symbol	H. sapiens	27129	H. sapiens	HSPB7	heat shock protein family B (small) member 7	GO:0006986 response to unfolded protein;GO:0035966 response to topologically incorrect protein;GO:0008016 regulation of heart contraction		Predicted intracellular proteins	Nucleoplasm (Approved)				0.0	0.0	0.0	0.0	0.0	0.0	0.0	0.0	0.0	0.0	0.0	0.0	0.0	0.0	0.0	0.0	0.0	0.0	1.0	0.0
ZNF331	55422	symbol	H. sapiens	55422	H. sapiens	ZNF331	zinc finger protein 331	GO:0006357 regulation of transcription by RNA polymerase II;GO:0006355 regulation of transcription, DNA-templated;GO:1903506 regulation of nucleic acid-templated transcription		Transcription factors:Zinc-coordinating DNA-binding domains; Predicted intracellular proteins; Cancer-related genes	Nucleoplasm (Approved)				0.0	0.0	0.0	0.0	0.0	0.0	0.0	0.0	0.0	0.0	0.0	0.0	0.0	0.0	0.0	0.0	0.0	0.0	0.0	0.0
KPRP	448834	symbol	H. sapiens	448834	H. sapiens	KPRP	keratinocyte proline rich protein			Predicted intracellular proteins					0.0	0.0	0.0	0.0	0.0	0.0	0.0	0.0	0.0	0.0	0.0	0.0	0.0	0.0	0.0	0.0	0.0	0.0	0.0	0.0
ARHGAP29	9411	symbol	H. sapiens	9411	H. sapiens	ARHGAP29	Rho GTPase activating protein 29	GO:0007266 Rho protein signal transduction;GO:0090630 activation of GTPase activity;GO:0007265 Ras protein signal transduction		Predicted intracellular proteins	Centrosome;Nucleoplasm (Approved); Additional: Cytosol;Plasma membrane			(M5893)HALLMARK MITOTIC SPINDLE	0.0	0.0	0.0	0.0	0.0	0.0	0.0	0.0	1.0	0.0	0.0	0.0	0.0	0.0	0.0	1.0	0.0	0.0	0.0	0.0
LINC01252	338817	symbol	H. sapiens	338817	H. sapiens	LINC01252	long intergenic non-protein coding RNA 1252								0.0	0.0	0.0	0.0	0.0	0.0	0.0	0.0	0.0	0.0	0.0	0.0	0.0	0.0	0.0	0.0	0.0	0.0	0.0	0.0
KLF11	8462	symbol	H. sapiens	8462	H. sapiens	KLF11	Kruppel like factor 11	GO:0000083 regulation of transcription involved in G1/S transition of mitotic cell cycle;GO:0000082 G1/S transition of mitotic cell cycle;GO:0044843 cell cycle G1/S phase transition		Transcription factors:Zinc-coordinating DNA-binding domains; Human disease related genes:Endocrine and metabolic diseases:Diabetes; Predicted intracellular proteins; Disease related genes	Nucleoplasm (Supported); Additional: Cytosol;Focal adhesion sites;Nuclear bodies				0.0	0.0	0.0	0.0	0.0	1.0	0.0	0.0	0.0	0.0	0.0	0.0	0.0	0.0	0.0	0.0	0.0	0.0	0.0	0.0
ATP2B1	490	symbol	H. sapiens	490	H. sapiens	ATP2B1	ATPase plasma membrane Ca2+ transporting 1	GO:0071386 cellular response to corticosterone stimulus;GO:1990034 calcium ion export across plasma membrane;GO:1901660 calcium ion export		Enzymes; Transporters:Primary Active Transporters; ENZYME proteins; FDA approved drug targets:Small molecule drugs	Plasma membrane (Supported)	Halothane	(M195)PID CMYB PATHWAY	(M5942)HALLMARK UV RESPONSE DN; (M5890)HALLMARK TNFA SIGNALING VIA NFKB; (M5932)HALLMARK INFLAMMATORY RESPONSE	1.0	0.0	0.0	0.0	0.0	0.0	1.0	0.0	0.0	0.0	0.0	0.0	0.0	0.0	0.0	0.0	0.0	0.0	1.0	0.0
DRICH1	51233	symbol	H. sapiens	51233	H. sapiens	DRICH1	aspartate rich 1			Predicted intracellular proteins	Nucleoli;Nucleoplasm (Approved)				0.0	0.0	0.0	0.0	0.0	0.0	0.0	0.0	0.0	0.0	0.0	0.0	0.0	0.0	0.0	0.0	0.0	0.0	0.0	0.0
C1orf21	81563	symbol	H. sapiens	81563	H. sapiens	C1orf21	chromosome 1 open reading frame 21			Predicted intracellular proteins	Cytosol;Nucleoplasm (Approved)				0.0	0.0	0.0	0.0	0.0	0.0	0.0	0.0	0.0	0.0	0.0	0.0	0.0	0.0	0.0	0.0	0.0	0.0	0.0	0.0
TLR5	7100	symbol	H. sapiens	7100	H. sapiens	TLR5	toll like receptor 5	GO:0034146 toll-like receptor 5 signaling pathway;GO:0002755 MyD88-dependent toll-like receptor signaling pathway;GO:0034123 positive regulation of toll-like receptor signaling pathway		Predicted intracellular proteins; Disease related genes; Human disease related genes:Immune system diseases:Allergies and autoimmune diseases	Golgi apparatus (Approved); Additional: Cytosol;Nucleoplasm				0.0	0.0	0.0	0.0	0.0	1.0	0.0	0.0	0.0	0.0	0.0	0.0	0.0	1.0	0.0	0.0	0.0	0.0	0.0	0.0
FBXW7	55294	symbol	H. sapiens	55294	H. sapiens	FBXW7	F-box and WD repeat domain containing 7	GO:1903378 positive regulation of oxidative stress-induced neuron intrinsic apoptotic signaling pathway;GO:2000639 negative regulation of SREBP signaling pathway;GO:2000346 negative regulation of hepatocyte proliferation		Predicted intracellular proteins; Cancer-related genes:Mutational cancer driver genes; Cancer-related genes:Mutated cancer genes	Nucleoplasm;Vesicles (Supported)		(M139)PID MYC PATHWAY; (M236)PID DELTA NP63 PATHWAY; (M17)PID NOTCH PATHWAY	(M5939)HALLMARK P53 PATHWAY	0.0	0.0	0.0	1.0	1.0	0.0	0.0	0.0	0.0	0.0	0.0	0.0	0.0	0.0	0.0	1.0	0.0	0.0	0.0	0.0
FBXW2	26190	symbol	H. sapiens	26190	H. sapiens	FBXW2	F-box and WD repeat domain containing 2	GO:0016567 protein ubiquitination;GO:0032446 protein modification by small protein conjugation;GO:0070647 protein modification by small protein conjugation or removal		Predicted intracellular proteins	Nucleoplasm (Approved)		(M5493)WNT SIGNALING		0.0	0.0	0.0	0.0	0.0	0.0	0.0	0.0	0.0	0.0	0.0	0.0	0.0	0.0	0.0	0.0	0.0	0.0	0.0	0.0
TBX19	9095	symbol	H. sapiens	9095	H. sapiens	TBX19	T-box transcription factor 19	GO:0021983 pituitary gland development;GO:0001707 mesoderm formation;GO:0048332 mesoderm morphogenesis		Human disease related genes:Endocrine and metabolic diseases:Hypothalamus and pituitary gland diseases; Transcription factors:Immunoglobulin fold; Predicted intracellular proteins; Disease related genes	Nuclear speckles (Approved)				0.0	0.0	0.0	0.0	0.0	1.0	0.0	0.0	0.0	0.0	0.0	0.0	0.0	0.0	0.0	0.0	0.0	0.0	0.0	0.0
UBE2F	140739	symbol	H. sapiens	140739	H. sapiens	UBE2F	ubiquitin conjugating enzyme E2 F (putative)	GO:0045116 protein neddylation;GO:0043687 post-translational protein modification;GO:0032446 protein modification by small protein conjugation		Enzymes; Predicted intracellular proteins; ENZYME proteins:Transferases	Cytosol (Approved)				0.0	0.0	0.0	0.0	0.0	1.0	0.0	0.0	0.0	0.0	0.0	0.0	0.0	0.0	0.0	0.0	0.0	0.0	0.0	0.0
SMOC2	64094	symbol	H. sapiens	64094	H. sapiens	SMOC2	SPARC related modular calcium binding 2	GO:0035470 positive regulation of vascular wound healing;GO:1900748 positive regulation of vascular endothelial growth factor signaling pathway;GO:0045743 positive regulation of fibroblast growth factor receptor signaling pathway		Predicted secreted proteins; Human disease related genes:Digestive system diseases:Mouth and dental diseases; Predicted intracellular proteins; Disease related genes			(M3008)NABA ECM GLYCOPROTEINS; (M5884)NABA CORE MATRISOME; (M5889)NABA MATRISOME		0.0	0.0	0.0	0.0	0.0	0.0	0.0	0.0	0.0	0.0	0.0	0.0	0.0	0.0	1.0	0.0	0.0	0.0	0.0	0.0
SERPINB9P1	221756	symbol	H. sapiens	221756	H. sapiens	SERPINB9P1	serpin family B member 9 pseudogene 1								0.0	0.0	0.0	0.0	0.0	0.0	0.0	0.0	0.0	0.0	0.0	0.0	0.0	0.0	0.0	0.0	0.0	0.0	0.0	0.0
MANBAL	63905	symbol	H. sapiens	63905	H. sapiens	MANBAL	mannosidase beta like				Mitochondria (Approved); Additional: Nucleoplasm				0.0	0.0	0.0	0.0	0.0	0.0	0.0	0.0	0.0	0.0	0.0	0.0	0.0	0.0	0.0	0.0	0.0	0.0	0.0	0.0
USP43	124739	symbol	H. sapiens	124739	H. sapiens	USP43	ubiquitin specific peptidase 43	GO:0019985 translesion synthesis;GO:0006301 postreplication repair;GO:0000731 DNA synthesis involved in DNA repair		Enzymes; ENZYME proteins:Hydrolases; Predicted intracellular proteins; Peptidases:Cysteine-type peptidases	Nuclear speckles;Nucleoplasm (Approved)				0.0	0.0	0.0	0.0	0.0	0.0	0.0	0.0	0.0	0.0	0.0	0.0	0.0	0.0	0.0	0.0	0.0	0.0	0.0	0.0
PGR	5241	symbol	H. sapiens	5241	H. sapiens	PGR	progesterone receptor	GO:0060748 tertiary branching involved in mammary gland duct morphogenesis;GO:0060745 mammary gland branching involved in pregnancy;GO:0038001 paracrine signaling		Transporters; FDA approved drug targets:Small molecule drugs; Cancer-related genes:Candidate cancer biomarkers; Transcription factors:Zinc-coordinating DNA-binding domains; Nuclear receptors; Predicted intracellular proteins		Etonogestrel; Desogestrel; Megestrol acetate; Levonorgestrel; Dydrogesterone; Progesterone; Spironolactone; Lindane; Fluticasone propionate; Medroxyprogesterone acetate; Mitotane; Norethisterone; Mometasone; Ethynodiol diacetate; Mifepristone; Norgestimate; Drospirenone; Danazol; Oxybenzone; Allylestrenol; Phthalic Acid; Metribolone; Tanaproget; Telapristone acetate; Asoprisnil; Norelgestromin; G…	(M267)PID ANTHRAX PATHWAY; (M200)PID ERA GENOMIC PATHWAY	(M5906)HALLMARK ESTROGEN RESPONSE EARLY; (M5907)HALLMARK ESTROGEN RESPONSE LATE	0.0	0.0	0.0	1.0	1.0	1.0	0.0	0.0	0.0	0.0	0.0	0.0	0.0	0.0	0.0	0.0	0.0	0.0	1.0	0.0
CLEC12A	160364	symbol	H. sapiens	160364	H. sapiens	CLEC12A	C-type lectin domain family 12 member A			Predicted intracellular proteins; CD markers			(M5880)NABA ECM AFFILIATED; (M5885)NABA MATRISOME ASSOCIATED; (M5889)NABA MATRISOME		0.0	0.0	0.0	0.0	0.0	0.0	0.0	0.0	0.0	0.0	0.0	0.0	0.0	0.0	0.0	0.0	0.0	1.0	0.0	0.0
WDR82	80335	symbol	H. sapiens	80335	H. sapiens	WDR82	WD repeat domain 82	GO:0080182 histone H3-K4 trimethylation;GO:0018023 peptidyl-lysine trimethylation;GO:0051568 histone H3-K4 methylation		Predicted intracellular proteins	Nucleoli rim (Supported)				0.0	0.0	0.0	0.0	0.0	0.0	0.0	0.0	0.0	0.0	0.0	0.0	0.0	0.0	0.0	0.0	0.0	0.0	0.0	0.0
WASF1	8936	symbol	H. sapiens	8936	H. sapiens	WASF1	WASP family member 1	GO:0098939 dendritic transport of mitochondrion;GO:0098885 modification of postsynaptic actin cytoskeleton;GO:0051388 positive regulation of neurotrophin TRK receptor signaling pathway		Predicted intracellular proteins; Human disease related genes:Other diseases:Mental and behavioural disorders; Disease related genes			(M16801)SIG REGULATION OF THE ACTIN CYTOSKELETON BY RHO GTPASES; (M5193)SIG CHEMOTAXIS; (M278)PID RAC1 PATHWAY	(M5893)HALLMARK MITOTIC SPINDLE	0.0	0.0	0.0	1.0	0.0	1.0	0.0	0.0	1.0	1.0	0.0	1.0	1.0	0.0	0.0	0.0	1.0	0.0	0.0	0.0
CACNA1G	8913	symbol	H. sapiens	8913	H. sapiens	CACNA1G	calcium voltage-gated channel subunit alpha1 G	GO:0010045 response to nickel cation;GO:0086046 membrane depolarization during SA node cell action potential;GO:0086045 membrane depolarization during AV node cell action potential		Voltage-gated ion channels:Voltage-Gated Calcium Channels; FDA approved drug targets:Small molecule drugs; Human disease related genes:Nervous system diseases:Neurodegenerative diseases; Disease related genes		Trimethadione; Cinnarizine; Ethosuximide; Verapamil; Zonisamide; Nifedipine; Mibefradil; Flunarizine; Methsuximide; Cannabidiol; Trimebutine; Benidipine; Manidipine; Bioallethrin; Medical Cannabis; Nabiximols	(M223)PID BETA CATENIN NUC PATHWAY		1.0	0.0	0.0	0.0	0.0	1.0	0.0	0.0	0.0	0.0	1.0	0.0	0.0	0.0	0.0	0.0	1.0	0.0	1.0	0.0
NCOA4	8031	symbol	H. sapiens	8031	H. sapiens	NCOA4	nuclear receptor coactivator 4	GO:0071394 cellular response to testosterone stimulus;GO:0071391 cellular response to estrogen stimulus;GO:0030520 intracellular estrogen receptor signaling pathway		Human disease related genes:Cancers:Cancers of endocrine organs; Predicted intracellular proteins; Cancer-related genes:Mutational cancer driver genes; Disease related genes	Nucleoli (Approved); Additional: Cytosol;Golgi apparatus		(M58)PID AR PATHWAY	(M5908)HALLMARK ANDROGEN RESPONSE; (M5945)HALLMARK HEME METABOLISM	0.0	0.0	0.0	0.0	0.0	0.0	0.0	0.0	0.0	0.0	0.0	0.0	0.0	0.0	0.0	0.0	0.0	0.0	0.0	0.0
GABRE	2564	symbol	H. sapiens	2564	H. sapiens	GABRE	gamma-aminobutyric acid type A receptor subunit epsilon	GO:2001226 negative regulation of chloride transport;GO:2001225 regulation of chloride transport;GO:0051932 synaptic transmission, GABAergic		FDA approved drug targets:Small molecule drugs		Ethanol; Fludiazepam			1.0	0.0	0.0	0.0	0.0	0.0	0.0	0.0	0.0	0.0	0.0	0.0	0.0	0.0	0.0	0.0	0.0	0.0	0.0	0.0
VAMP4	8674	symbol	H. sapiens	8674	H. sapiens	VAMP4	vesicle associated membrane protein 4	GO:0016189 synaptic vesicle to endosome fusion;GO:0099532 synaptic vesicle endosomal processing;GO:0035493 SNARE complex assembly			Golgi apparatus (Approved)			(M5910)HALLMARK PROTEIN SECRETION	0.0	0.0	0.0	0.0	0.0	0.0	0.0	0.0	0.0	0.0	1.0	0.0	0.0	0.0	0.0	0.0	0.0	0.0	0.0	0.0
PLA2G5	5322	symbol	H. sapiens	5322	H. sapiens	PLA2G5	phospholipase A2 group V	GO:1905164 positive regulation of phagosome maturation;GO:0090265 positive regulation of immune complex clearance by monocytes and macrophages;GO:1905162 regulation of phagosome maturation		ENZYME proteins:Hydrolases; Predicted secreted proteins; Human disease related genes:Nervous system diseases:Eye disease; Disease related genes; Potential drug targets; Enzymes; RAS pathway related proteins					0.0	0.0	0.0	1.0	0.0	0.0	0.0	0.0	0.0	1.0	1.0	0.0	0.0	0.0	1.0	1.0	0.0	0.0	0.0	0.0

## Sheet: Enrichment
GroupID	Category	Term	Description	LogP	Log(q-value)	InTerm_InList	Genes	Symbols
1_Summary	GO Biological Processes	GO:0051051	negative regulation of transport	-6.89025	-2.54357	22/463	150,347,1193,2564,3598,3745,3952,4129,5028,5593,5879,5906,7009,8682,8724,9341,10681,27342,55198,55737,65125,401152,490,825,1318,2280,3603,3739,8913,9104,93589,162514,1432,51703	ADRA2A,APOD,CLIC2,GABRE,IL13RA2,KCNB1,LEP,MAOB,P2RY1,PRKG2,RAC1,RAP1A,TMBIM6,PEA15,SNX3,VAMP3,GNB5,RABGEF1,APPL2,VPS35,WNK1,C4orf3,ATP2B1,CAPN3,SLC31A2,FKBP1A,IL16,KCNA4,CACNA1G,RGN,CACNA2D4,TRPV3,MAPK14,ACSL5
1_Member	GO Biological Processes	GO:0051051	negative regulation of transport	-6.89025	-2.54357	22/463	150,347,1193,2564,3598,3745,3952,4129,5028,5593,5879,5906,7009,8682,8724,9341,10681,27342,55198,55737,65125,401152	ADRA2A,APOD,CLIC2,GABRE,IL13RA2,KCNB1,LEP,MAOB,P2RY1,PRKG2,RAC1,RAP1A,TMBIM6,PEA15,SNX3,VAMP3,GNB5,RABGEF1,APPL2,VPS35,WNK1,C4orf3
1_Member	GO Biological Processes	GO:0043271	negative regulation of ion transport	-4.54185	-1.55689	10/155	150,1193,2564,3952,4129,5593,7009,10681,65125,401152	ADRA2A,CLIC2,GABRE,LEP,MAOB,PRKG2,TMBIM6,GNB5,WNK1,C4orf3
1_Member	GO Biological Processes	GO:0043269	regulation of ion transport	-4.1769	-1.37973	22/685	150,490,825,1193,1318,2280,2564,3603,3739,3745,3952,4129,5028,5593,7009,8913,9104,10681,65125,93589,162514,401152	ADRA2A,ATP2B1,CAPN3,CLIC2,SLC31A2,FKBP1A,GABRE,IL16,KCNA4,KCNB1,LEP,MAOB,P2RY1,PRKG2,TMBIM6,CACNA1G,RGN,GNB5,WNK1,CACNA2D4,TRPV3,C4orf3
1_Member	GO Biological Processes	GO:0051924	regulation of calcium ion transport	-3.43364	-1.15563	11/251	150,490,825,1193,2280,3603,7009,9104,10681,162514,401152	ADRA2A,ATP2B1,CAPN3,CLIC2,FKBP1A,IL16,TMBIM6,RGN,GNB5,TRPV3,C4orf3
1_Member	GO Biological Processes	GO:0034762	regulation of transmembrane transport	-3.34359	-1.13397	18/580	150,825,1193,1318,1432,2280,3739,3745,3952,8682,8913,9104,10681,51703,55198,65125,93589,401152	ADRA2A,CAPN3,CLIC2,SLC31A2,MAPK14,FKBP1A,KCNA4,KCNB1,LEP,PEA15,CACNA1G,RGN,GNB5,ACSL5,APPL2,WNK1,CACNA2D4,C4orf3
1_Member	GO Biological Processes	GO:1901019	regulation of calcium ion transmembrane transporter activity	-2.98587	-0.963471	6/91	150,1193,2280,9104,10681,401152	ADRA2A,CLIC2,FKBP1A,RGN,GNB5,C4orf3
1_Member	GO Biological Processes	GO:1901020	negative regulation of calcium ion transmembrane transporter activity	-2.84425	-0.87778	4/39	150,1193,10681,401152	ADRA2A,CLIC2,GNB5,C4orf3
1_Member	GO Biological Processes	GO:0051926	negative regulation of calcium ion transport	-2.80595	-0.855769	5/67	150,1193,7009,10681,401152	ADRA2A,CLIC2,TMBIM6,GNB5,C4orf3
1_Member	GO Biological Processes	GO:0010959	regulation of metal ion transport	-2.7111	-0.810016	13/403	150,490,825,1193,1318,2280,3603,7009,9104,10681,65125,162514,401152	ADRA2A,ATP2B1,CAPN3,CLIC2,SLC31A2,FKBP1A,IL16,TMBIM6,RGN,GNB5,WNK1,TRPV3,C4orf3
1_Member	GO Biological Processes	GO:0034763	negative regulation of transmembrane transport	-2.67558	-0.789795	7/141	150,1193,3952,8682,10681,55198,401152	ADRA2A,CLIC2,LEP,PEA15,GNB5,APPL2,C4orf3
1_Member	GO Biological Processes	GO:1903170	negative regulation of calcium ion transmembrane transport	-2.6119	-0.746657	4/45	150,1193,10681,401152	ADRA2A,CLIC2,GNB5,C4orf3
1_Member	GO Biological Processes	GO:1903169	regulation of calcium ion transmembrane transport	-2.4309	-0.634439	7/156	150,825,1193,2280,9104,10681,401152	ADRA2A,CAPN3,CLIC2,FKBP1A,RGN,GNB5,C4orf3
1_Member	GO Biological Processes	GO:0034765	regulation of ion transmembrane transport	-2.06002	-0.416628	13/483	150,825,1193,1318,2280,3739,3745,8913,9104,10681,65125,93589,401152	ADRA2A,CAPN3,CLIC2,SLC31A2,FKBP1A,KCNA4,KCNB1,CACNA1G,RGN,GNB5,WNK1,CACNA2D4,C4orf3
2_Summary	Reactome Gene Sets	R-HSA-449147	Signaling by Interleukins	-6.28888	-2.24323	21/462	1432,1901,2308,3598,3603,4128,4313,5306,5594,5601,5711,5782,5898,6778,6935,11213,23118,53833,58480,58985,257397,4600,4939,5618,7706,8554	MAPK14,S1PR1,FOXO1,IL13RA2,IL16,MAOA,MMP2,PITPNA,MAPK1,MAPK9,PSMD5,PTPN12,RALA,STAT6,ZEB1,IRAK3,TAB2,IL20RB,RHOU,IL22RA1,TAB3,MX2,OAS2,PRLR,TRIM25,PIAS1
2_Member	Reactome Gene Sets	R-HSA-449147	Signaling by Interleukins	-6.28888	-2.24323	21/462	1432,1901,2308,3598,3603,4128,4313,5306,5594,5601,5711,5782,5898,6778,6935,11213,23118,53833,58480,58985,257397	MAPK14,S1PR1,FOXO1,IL13RA2,IL16,MAOA,MMP2,PITPNA,MAPK1,MAPK9,PSMD5,PTPN12,RALA,STAT6,ZEB1,IRAK3,TAB2,IL20RB,RHOU,IL22RA1,TAB3
2_Member	Reactome Gene Sets	R-HSA-1280215	Cytokine Signaling in Immune system	-5.79194	-2.21206	26/715	1432,1901,2308,3598,3603,4128,4313,4600,4939,5306,5594,5601,5618,5711,5782,5898,6778,6935,7706,8554,11213,23118,53833,58480,58985,257397	MAPK14,S1PR1,FOXO1,IL13RA2,IL16,MAOA,MMP2,MX2,OAS2,PITPNA,MAPK1,MAPK9,PRLR,PSMD5,PTPN12,RALA,STAT6,ZEB1,TRIM25,PIAS1,IRAK3,TAB2,IL20RB,RHOU,IL22RA1,TAB3
2_Member	Reactome Gene Sets	R-HSA-6785807	Interleukin-4 and Interleukin-13 signaling	-4.16358	-1.37973	8/108	1901,2308,3598,4128,4313,6778,6935,58480	S1PR1,FOXO1,IL13RA2,MAOA,MMP2,STAT6,ZEB1,RHOU
3_Summary	GO Biological Processes	GO:0042133	neurotransmitter metabolic process	-5.94499	-2.21206	6/28	223,2571,4128,4129,26002,145270,150,5028,5906,8867,23621,443,1962,3030,3628,51302	ALDH9A1,GAD1,MAOA,MAOB,MOXD1,PRIMA1,ADRA2A,P2RY1,RAP1A,SYNJ1,BACE1,ASPA,EHHADH,HADHA,INPP1,CYP39A1
3_Member	GO Biological Processes	GO:0042133	neurotransmitter metabolic process	-5.94499	-2.21206	6/28	223,2571,4128,4129,26002,145270	ALDH9A1,GAD1,MAOA,MAOB,MOXD1,PRIMA1
3_Member	GO Biological Processes	GO:0001505	regulation of neurotransmitter levels	-4.08869	-1.37973	11/211	150,223,2571,4128,4129,5028,5906,8867,23621,26002,145270	ADRA2A,ALDH9A1,GAD1,MAOA,MAOB,P2RY1,RAP1A,SYNJ1,BACE1,MOXD1,PRIMA1
3_Member	KEGG Pathway	hsa00340	Histidine metabolism	-3.82207	-1.28412	4/22	223,443,4128,4129	ALDH9A1,ASPA,MAOA,MAOB
3_Member	KEGG Pathway	hsa00380	Tryptophan metabolism	-3.74975	-1.26643	5/42	223,1962,3030,4128,4129	ALDH9A1,EHHADH,HADHA,MAOA,MAOB
3_Member	GO Biological Processes	GO:0019614	catechol-containing compound catabolic process	-3.65389	-1.24042	3/10	4128,4129,26002	MAOA,MAOB,MOXD1
3_Member	GO Biological Processes	GO:0042420	dopamine catabolic process	-3.65389	-1.24042	3/10	4128,4129,26002	MAOA,MAOB,MOXD1
3_Member	GO Biological Processes	GO:0042424	catecholamine catabolic process	-3.65389	-1.24042	3/10	4128,4129,26002	MAOA,MAOB,MOXD1
3_Member	GO Biological Processes	GO:0042135	neurotransmitter catabolic process	-3.51966	-1.18838	3/11	4128,4129,145270	MAOA,MAOB,PRIMA1
3_Member	GO Biological Processes	GO:1901616	organic hydroxy compound catabolic process	-3.3408	-1.13397	6/78	3628,4128,4129,8867,26002,51302	INPP1,MAOA,MAOB,SYNJ1,MOXD1,CYP39A1
3_Member	GO Biological Processes	GO:0019336	phenol-containing compound catabolic process	-3.2889	-1.10657	3/13	4128,4129,26002	MAOA,MAOB,MOXD1
3_Member	GO Biological Processes	GO:0009310	amine catabolic process	-2.29054	-0.54374	3/28	4128,4129,26002	MAOA,MAOB,MOXD1
3_Member	GO Biological Processes	GO:0042402	cellular biogenic amine catabolic process	-2.29054	-0.54374	3/28	4128,4129,26002	MAOA,MAOB,MOXD1
3_Member	GO Biological Processes	GO:0042417	dopamine metabolic process	-2.2054	-0.494197	3/30	4128,4129,26002	MAOA,MAOB,MOXD1
4_Summary	WikiPathways	WP437	EGF/EGFR signaling pathway	-5.93351	-2.21206	12/163	1432,2308,5594,5601,5782,5879,5898,5906,8867,10006,50807,51196,5603,7529,22866,54518,102,2254,3910,5241,6778,8936,23118,26052,83464,5028,5593,8605,2280,5711,27123,55294,5322,10681,8682,192670,1901,825,3676,3696	MAPK14,FOXO1,MAPK1,MAPK9,PTPN12,RAC1,RALA,RAP1A,SYNJ1,ABI1,ASAP1,PLCE1,MAPK13,YWHAB,CNKSR2,APBB1IP,ADAM10,FGF9,LAMA4,PGR,STAT6,WASF1,TAB2,DNM3,APH1B,P2RY1,PRKG2,PLA2G4C,FKBP1A,PSMD5,DKK2,FBXW7,PLA2G5,GNB5,PEA15,AGO4,S1PR1,CAPN3,ITGA4,ITGB8
4_Member	WikiPathways	WP437	EGF/EGFR signaling pathway	-5.93351	-2.21206	12/163	1432,2308,5594,5601,5782,5879,5898,5906,8867,10006,50807,51196	MAPK14,FOXO1,MAPK1,MAPK9,PTPN12,RAC1,RALA,RAP1A,SYNJ1,ABI1,ASAP1,PLCE1
4_Member	Reactome Gene Sets	R-HSA-187687	Signalling to ERKs	-5.42001	-1.93974	6/34	1432,5594,5603,5898,5906,7529	MAPK14,MAPK1,MAPK13,RALA,RAP1A,YWHAB
4_Member	Reactome Gene Sets	R-HSA-6802948	Signaling by high-kinase activity BRAF mutants	-4.07633	-1.37973	5/36	5594,5906,7529,22866,54518	MAPK1,RAP1A,YWHAB,CNKSR2,APBB1IP
4_Member	Reactome Gene Sets	R-HSA-9006934	Signaling by Receptor Tyrosine Kinases	-3.90492	-1.33638	18/521	102,1432,2254,3910,5241,5594,5603,5782,5879,5898,5906,6778,7529,8936,10006,23118,26052,83464	ADAM10,MAPK14,FGF9,LAMA4,PGR,MAPK1,MAPK13,PTPN12,RAC1,RALA,RAP1A,STAT6,YWHAB,WASF1,ABI1,TAB2,DNM3,APH1B
4_Member	Reactome Gene Sets	R-HSA-5674135	MAP2K and MAPK activation	-3.85233	-1.30499	5/40	5594,5906,7529,22866,54518	MAPK1,RAP1A,YWHAB,CNKSR2,APBB1IP
4_Member	KEGG Pathway	hsa04611	Platelet activation	-3.74388	-1.26643	8/124	1432,5028,5593,5594,5603,5906,8605,54518	MAPK14,P2RY1,PRKG2,MAPK1,MAPK13,RAP1A,PLA2G4C,APBB1IP
4_Member	Reactome Gene Sets	R-HSA-9656223	Signaling by RAF1 mutants	-3.70053	-1.25147	5/43	5594,5906,7529,22866,54518	MAPK1,RAP1A,YWHAB,CNKSR2,APBB1IP
4_Member	Reactome Gene Sets	R-HSA-6802946	Signaling by moderate kinase activity BRAF mutants	-3.51603	-1.18838	5/47	5594,5906,7529,22866,54518	MAPK1,RAP1A,YWHAB,CNKSR2,APBB1IP
4_Member	Reactome Gene Sets	R-HSA-6802949	Signaling by RAS mutants	-3.51603	-1.18838	5/47	5594,5906,7529,22866,54518	MAPK1,RAP1A,YWHAB,CNKSR2,APBB1IP
4_Member	Reactome Gene Sets	R-HSA-6802955	Paradoxical activation of RAF signaling by kinase inactive BRAF	-3.51603	-1.18838	5/47	5594,5906,7529,22866,54518	MAPK1,RAP1A,YWHAB,CNKSR2,APBB1IP
4_Member	Reactome Gene Sets	R-HSA-9649948	Signaling downstream of RAS mutants	-3.51603	-1.18838	5/47	5594,5906,7529,22866,54518	MAPK1,RAP1A,YWHAB,CNKSR2,APBB1IP
4_Member	Reactome Gene Sets	R-HSA-166520	Signaling by NTRKs	-3.51388	-1.18838	8/134	1432,5594,5603,5879,5898,5906,7529,26052	MAPK14,MAPK1,MAPK13,RAC1,RALA,RAP1A,YWHAB,DNM3
4_Member	KEGG Pathway	hsa04015	Rap1 signaling pathway	-3.4526	-1.16661	10/210	1432,2254,5028,5594,5603,5879,5898,5906,51196,54518	MAPK14,FGF9,P2RY1,MAPK1,MAPK13,RAC1,RALA,RAP1A,PLCE1,APBB1IP
4_Member	Reactome Gene Sets	R-HSA-170968	Frs2-mediated activation	-3.39878	-1.142	3/12	5594,5906,7529	MAPK1,RAP1A,YWHAB
4_Member	Reactome Gene Sets	R-HSA-5663202	Diseases of signal transduction by growth factor receptors and second messengers	-3.36009	-1.13397	15/433	102,2254,2280,2308,5594,5711,5782,5879,5906,7529,22866,27123,54518,55294,83464	ADAM10,FGF9,FKBP1A,FOXO1,MAPK1,PSMD5,PTPN12,RAC1,RAP1A,YWHAB,CNKSR2,DKK2,APBB1IP,FBXW7,APH1B
4_Member	WikiPathways	WP4223	Ras signaling	-3.22801	-1.07662	9/185	5322,5594,5601,5879,5898,5906,8605,10681,51196	PLA2G5,MAPK1,MAPK9,RAC1,RALA,RAP1A,PLA2G4C,GNB5,PLCE1
4_Member	Reactome Gene Sets	R-HSA-187037	Signaling by NTRK1 (TRKA)	-3.19018	-1.07662	7/115	1432,5594,5603,5898,5906,7529,26052	MAPK14,MAPK1,MAPK13,RALA,RAP1A,YWHAB,DNM3
4_Member	Reactome Gene Sets	R-HSA-169893	Prolonged ERK activation events	-3.18823	-1.07662	3/14	5594,5906,7529	MAPK1,RAP1A,YWHAB
4_Member	KEGG Pathway	hsa04014	Ras signaling pathway	-3.11595	-1.02934	10/232	2254,5322,5594,5601,5879,5898,5906,8605,10681,51196	FGF9,PLA2G5,MAPK1,MAPK9,RAC1,RALA,RAP1A,PLA2G4C,GNB5,PLCE1
4_Member	Canonical Pathways	M281	PID FAK PATHWAY	-3.05577	-1.00134	5/59	5594,5601,5879,5906,50807	MAPK1,MAPK9,RAC1,RAP1A,ASAP1
4_Member	Reactome Gene Sets	R-HSA-5683057	MAPK family signaling cascades	-3.03258	-0.98507	12/325	2254,2308,5593,5594,5711,5879,5906,7529,8682,22866,54518,192670	FGF9,FOXO1,PRKG2,MAPK1,PSMD5,RAC1,RAP1A,YWHAB,PEA15,CNKSR2,APBB1IP,AGO4
4_Member	Canonical Pathways	M186	PID PDGFRB PATHWAY	-2.89681	-0.912222	7/129	1901,5594,5601,5879,5906,7529,10006	S1PR1,MAPK1,MAPK9,RAC1,RAP1A,YWHAB,ABI1
4_Member	Reactome Gene Sets	R-HSA-6802952	Signaling by BRAF and RAF1 fusions	-2.80595	-0.855769	5/67	5594,5906,7529,22866,54518	MAPK1,RAP1A,YWHAB,CNKSR2,APBB1IP
4_Member	Canonical Pathways	M62	PID EPHB FWD PATHWAY	-2.80278	-0.855769	4/40	5594,5879,5906,8867	MAPK1,RAC1,RAP1A,SYNJ1
4_Member	WikiPathways	WP185	Integrin-mediated cell adhesion	-2.68766	-0.797345	6/104	825,3676,3696,5594,5879,5906	CAPN3,ITGA4,ITGB8,MAPK1,RAC1,RAP1A
4_Member	Canonical Pathways	M164	PID ERBB1 DOWNSTREAM PATHWAY	-2.66664	-0.783851	6/105	5594,5601,5879,5898,7529,10006	MAPK1,MAPK9,RAC1,RALA,YWHAB,ABI1
4_Member	Reactome Gene Sets	R-HSA-6802957	Oncogenic MAPK signaling	-2.37644	-0.59796	5/84	5594,5906,7529,22866,54518	MAPK1,RAP1A,YWHAB,CNKSR2,APBB1IP
4_Member	Reactome Gene Sets	R-HSA-5673001	RAF/MAP kinase cascade	-2.02609	-0.396369	9/280	2254,5593,5594,5711,5906,7529,8682,22866,54518	FGF9,PRKG2,MAPK1,PSMD5,RAP1A,YWHAB,PEA15,CNKSR2,APBB1IP
5_Summary	GO Biological Processes	GO:0001955	blood vessel maturation	-5.7806	-2.21206	4/8	94,1901,4313,8434,347,1432,1893,2254,2308,3696,3952,5594,6423,6443,6444,7127,55294,57007,79893,84168,1522,2018,5087,5241,5898,6935,4653,23424,126668,221400	ACVRL1,S1PR1,MMP2,RECK,APOD,MAPK14,ECM1,FGF9,FOXO1,ITGB8,LEP,MAPK1,SFRP2,SGCB,SGCD,TNFAIP2,FBXW7,ACKR3,GGNBP2,ANTXR1,CTSZ,EMX2,PBX1,PGR,RALA,ZEB1,MYOC,TDRD7,TDRD10,TDRD6
5_Member	GO Biological Processes	GO:0001955	blood vessel maturation	-5.7806	-2.21206	4/8	94,1901,4313,8434	ACVRL1,S1PR1,MMP2,RECK
5_Member	GO Biological Processes	GO:0001944	vasculature development	-4.86086	-1.66249	20/526	94,347,1432,1893,1901,2254,2308,3696,3952,4313,5594,6423,6443,6444,7127,8434,55294,57007,79893,84168	ACVRL1,APOD,MAPK14,ECM1,S1PR1,FGF9,FOXO1,ITGB8,LEP,MMP2,MAPK1,SFRP2,SGCB,SGCD,TNFAIP2,RECK,FBXW7,ACKR3,GGNBP2,ANTXR1
5_Member	GO Biological Processes	GO:0001568	blood vessel development	-4.60753	-1.56188	19/503	94,347,1432,1893,1901,2254,2308,3696,3952,4313,5594,6423,6444,7127,8434,55294,57007,79893,84168	ACVRL1,APOD,MAPK14,ECM1,S1PR1,FGF9,FOXO1,ITGB8,LEP,MMP2,MAPK1,SFRP2,SGCD,TNFAIP2,RECK,FBXW7,ACKR3,GGNBP2,ANTXR1
5_Member	GO Biological Processes	GO:0035239	tube morphogenesis	-3.94729	-1.3691	21/661	94,347,1432,1522,1893,1901,2018,2254,3696,3952,4313,5087,5241,5898,6423,6444,6935,7127,8434,55294,57007	ACVRL1,APOD,MAPK14,CTSZ,ECM1,S1PR1,EMX2,FGF9,ITGB8,LEP,MMP2,PBX1,PGR,RALA,SFRP2,SGCD,ZEB1,TNFAIP2,RECK,FBXW7,ACKR3
5_Member	GO Biological Processes	GO:0048514	blood vessel morphogenesis	-3.50935	-1.18797	15/419	94,347,1432,1893,1901,2254,3696,3952,4313,6423,6444,7127,8434,55294,57007	ACVRL1,APOD,MAPK14,ECM1,S1PR1,FGF9,ITGB8,LEP,MMP2,SFRP2,SGCD,TNFAIP2,RECK,FBXW7,ACKR3
5_Member	GO Biological Processes	GO:0071695	anatomical structure maturation	-3.4526	-1.16661	10/210	94,1901,3952,4313,4653,5241,8434,23424,126668,221400	ACVRL1,S1PR1,LEP,MMP2,MYOC,PGR,RECK,TDRD7,TDRD10,TDRD6
5_Member	GO Biological Processes	GO:0001525	angiogenesis	-3.07895	-1.00872	12/321	94,347,1432,1893,1901,2254,3952,4313,6423,7127,8434,57007	ACVRL1,APOD,MAPK14,ECM1,S1PR1,FGF9,LEP,MMP2,SFRP2,TNFAIP2,RECK,ACKR3
5_Member	GO Biological Processes	GO:0021700	developmental maturation	-2.92333	-0.93075	10/246	94,1901,3952,4313,4653,5241,8434,23424,126668,221400	ACVRL1,S1PR1,LEP,MMP2,MYOC,PGR,RECK,TDRD7,TDRD10,TDRD6
6_Summary	KEGG Pathway	hsa04621	NOD-like receptor signaling pathway	-5.38334	-1.93974	12/184	1432,1508,4939,5594,5601,5603,9051,22861,23118,84168,84674,257397,1366,5879,7009,7100,8936,10006,2308,4313,51196,710,717,1073,11213,26052,29761,8605,2254,5906,8913,93589,1780,5898,3952,5306,22885,223,53833,58985,843,3676,6778,7529,1901,259230,7706,6935,8462,8554,5618,102,1195,5593,11329,65125,3910,140739,10681,9095,5711,162514,971,2949,4600,5241	MAPK14,CTSB,OAS2,MAPK1,MAPK9,MAPK13,PSTPIP1,NLRP1,TAB2,ANTXR1,CARD6,TAB3,CLDN7,RAC1,TMBIM6,TLR5,WASF1,ABI1,FOXO1,MMP2,PLCE1,SERPING1,C2,CFL2,IRAK3,DNM3,USP25,PLA2G4C,FGF9,RAP1A,CACNA1G,CACNA2D4,DYNC1I1,RALA,LEP,PITPNA,ABLIM3,ALDH9A1,IL20RB,IL22RA1,CASP10,ITGA4,STAT6,YWHAB,S1PR1,SGMS1,TRIM25,ZEB1,KLF11,PIAS1,PRLR,ADAM10,CLK1,PRKG2,STK38,WNK1,LAMA4,UBE2F,GNB5,TBX19,PSMD5,TRPV3,CD72,GSTM5,MX2,PGR
6_Member	KEGG Pathway	hsa04621	NOD-like receptor signaling pathway	-5.38334	-1.93974	12/184	1432,1508,4939,5594,5601,5603,9051,22861,23118,84168,84674,257397	MAPK14,CTSB,OAS2,MAPK1,MAPK9,MAPK13,PSTPIP1,NLRP1,TAB2,ANTXR1,CARD6,TAB3
6_Member	KEGG Pathway	hsa05130	Pathogenic Escherichia coli infection	-5.08017	-1.73349	12/197	1366,1432,5594,5601,5603,5879,7009,7100,8936,10006,23118,257397	CLDN7,MAPK14,MAPK1,MAPK9,MAPK13,RAC1,TMBIM6,TLR5,WASF1,ABI1,TAB2,TAB3
6_Member	WikiPathways	WP3303	RAC1/PAK1/p38/MMP2 pathway	-4.58471	-1.56024	7/69	1432,2308,4313,5594,5601,5603,5879	MAPK14,FOXO1,MMP2,MAPK1,MAPK9,MAPK13,RAC1
6_Member	KEGG Pathway	hsa04933	AGE-RAGE signaling pathway in diabetic complications	-4.40264	-1.45389	8/100	1432,2308,4313,5594,5601,5603,5879,51196	MAPK14,FOXO1,MMP2,MAPK1,MAPK9,MAPK13,RAC1,PLCE1
6_Member	KEGG Pathway	hsa05133	Pertussis	-4.3107	-1.41117	7/76	710,717,1073,1432,5594,5601,5603	SERPING1,C2,CFL2,MAPK14,MAPK1,MAPK9,MAPK13
6_Member	WikiPathways	WP75	Toll-like receptor signaling pathway	-4.28036	-1.41094	8/104	1432,5594,5601,5603,5879,7100,23118,257397	MAPK14,MAPK1,MAPK9,MAPK13,RAC1,TLR5,TAB2,TAB3
6_Member	Reactome Gene Sets	R-HSA-168643	Nucleotide-binding domain, leucine rich repeat containing receptor (NLR) signaling pathways	-4.09466	-1.37973	6/57	1432,5603,9051,22861,23118,257397	MAPK14,MAPK13,PSTPIP1,NLRP1,TAB2,TAB3
6_Member	WikiPathways	WP195	IL-1 signaling pathway	-4.09466	-1.37973	6/57	1432,5594,5601,11213,23118,257397	MAPK14,MAPK1,MAPK9,IRAK3,TAB2,TAB3
6_Member	WikiPathways	WP1449	Regulation of toll-like receptor signaling pathway	-4.01431	-1.37825	9/145	1432,5594,5601,5603,5879,7100,11213,23118,257397	MAPK14,MAPK1,MAPK9,MAPK13,RAC1,TLR5,IRAK3,TAB2,TAB3
6_Member	Reactome Gene Sets	R-HSA-168898	Toll-like Receptor Cascades	-3.75209	-1.26643	9/157	1432,1508,5594,5601,7100,11213,23118,26052,257397	MAPK14,CTSB,MAPK1,MAPK9,TLR5,IRAK3,TAB2,DNM3,TAB3
6_Member	WikiPathways	WP2324	AGE/RAGE pathway	-3.73728	-1.26566	6/66	1432,2308,4313,5594,5601,5879	MAPK14,FOXO1,MMP2,MAPK1,MAPK9,RAC1
6_Member	KEGG Pathway	hsa04657	IL-17 signaling pathway	-3.72414	-1.26528	7/94	1432,5594,5601,5603,23118,29761,257397	MAPK14,MAPK1,MAPK9,MAPK13,TAB2,USP25,TAB3
6_Member	KEGG Pathway	hsa04664	Fc epsilon RI signaling pathway	-3.66557	-1.24042	6/68	1432,5594,5601,5603,5879,8605	MAPK14,MAPK1,MAPK9,MAPK13,RAC1,PLA2G4C
6_Member	Reactome Gene Sets	R-HSA-450341	Activation of the AP-1 family of transcription factors	-3.65389	-1.24042	3/10	1432,5594,5601	MAPK14,MAPK1,MAPK9
6_Member	WikiPathways	WP4341	Non-genomic actions of 1,25 dihydroxyvitamin D3	-3.56252	-1.2005	6/71	1432,4939,5594,5601,5603,51196	MAPK14,OAS2,MAPK1,MAPK9,MAPK13,PLCE1
6_Member	Reactome Gene Sets	R-HSA-376172	DSCAM interactions	-3.51966	-1.18838	3/11	1432,5603,5879	MAPK14,MAPK13,RAC1
6_Member	KEGG Pathway	hsa05131	Shigellosis	-3.49271	-1.17541	11/247	1432,2308,5594,5601,5603,5879,7100,8936,23118,51196,257397	MAPK14,FOXO1,MAPK1,MAPK9,MAPK13,RAC1,TLR5,WASF1,TAB2,PLCE1,TAB3
6_Member	WikiPathways	WP4767	FGFR3 signaling in chondrocyte proliferation and terminal differentiation	-3.46357	-1.16661	4/27	1432,2254,5594,5603	MAPK14,FGF9,MAPK1,MAPK13
6_Member	WikiPathways	WP382	MAPK signaling pathway	-3.46302	-1.16661	11/249	1432,2254,5594,5601,5603,5879,5906,8605,8913,23118,93589	MAPK14,FGF9,MAPK1,MAPK9,MAPK13,RAC1,RAP1A,PLA2G4C,CACNA1G,TAB2,CACNA2D4
6_Member	KEGG Pathway	hsa05132	Salmonella infection	-3.46302	-1.16661	11/249	1432,1780,5594,5601,5603,5879,5898,7100,10006,23118,257397	MAPK14,DYNC1I1,MAPK1,MAPK9,MAPK13,RAC1,RALA,TLR5,ABI1,TAB2,TAB3
6_Member	KEGG Pathway	hsa04620	Toll-like receptor signaling pathway	-3.45353	-1.16661	7/104	1432,5594,5601,5603,5879,7100,23118	MAPK14,MAPK1,MAPK9,MAPK13,RAC1,TLR5,TAB2
6_Member	Canonical Pathways	M92	PID ANGIOPOIETIN RECEPTOR PATHWAY	-3.43044	-1.15563	5/49	1432,2308,4313,5594,5879	MAPK14,FOXO1,MMP2,MAPK1,RAC1
6_Member	WikiPathways	WP2034	Leptin signaling pathway	-3.40167	-1.142	6/76	1073,1432,2308,3952,5594,5879	CFL2,MAPK14,FOXO1,LEP,MAPK1,RAC1
6_Member	Reactome Gene Sets	R-HSA-373752	Netrin-1 signaling	-3.38914	-1.13956	5/50	1432,5306,5603,5879,22885	MAPK14,PITPNA,MAPK13,RAC1,ABLIM3
6_Member	WikiPathways	WP2637	Interleukin-1 (IL-1) structural pathway	-3.38914	-1.13956	5/50	1432,5594,5601,23118,257397	MAPK14,MAPK1,MAPK9,TAB2,TAB3
6_Member	KEGG Pathway	hsa04936	Alcoholic liver disease	-3.34472	-1.13397	8/142	223,717,1432,2308,5601,5603,23118,257397	ALDH9A1,C2,MAPK14,FOXO1,MAPK9,MAPK13,TAB2,TAB3
6_Member	WikiPathways	WP2643	Nanoparticle-mediated activation of receptor signaling	-3.34077	-1.13397	4/29	1432,5594,5601,5603	MAPK14,MAPK1,MAPK9,MAPK13
6_Member	WikiPathways	WP3869	Cannabinoid receptor signaling	-3.34077	-1.13397	4/29	1432,5594,5601,5603	MAPK14,MAPK1,MAPK9,MAPK13
6_Member	WikiPathways	WP4538	Regulatory circuits of the STAT3 signaling pathway	-3.31106	-1.12274	6/79	1432,5594,5601,5603,53833,58985	MAPK14,MAPK1,MAPK9,MAPK13,IL20RB,IL22RA1
6_Member	Reactome Gene Sets	R-HSA-171007	p38MAPK events	-3.2889	-1.10657	3/13	1432,5603,5898	MAPK14,MAPK13,RALA
6_Member	KEGG Pathway	hsa04668	TNF signaling pathway	-3.25884	-1.08706	7/112	843,1432,5594,5601,5603,23118,257397	CASP10,MAPK14,MAPK1,MAPK9,MAPK13,TAB2,TAB3
6_Member	KEGG Pathway	hsa04670	Leukocyte transendothelial migration	-3.21282	-1.07662	7/114	1366,1432,3676,4313,5603,5879,5906	CLDN7,MAPK14,ITGA4,MMP2,MAPK13,RAC1,RAP1A
6_Member	WikiPathways	WP2018	RANKL/RANK signaling pathway	-3.19607	-1.07662	5/55	1432,5594,5601,5879,23118	MAPK14,MAPK1,MAPK9,RAC1,TAB2
6_Member	Reactome Gene Sets	R-HSA-168142	Toll Like Receptor 10 (TLR10) Cascade	-3.14157	-1.04774	6/85	1432,5594,5601,7100,23118,257397	MAPK14,MAPK1,MAPK9,TLR5,TAB2,TAB3
6_Member	Reactome Gene Sets	R-HSA-168176	Toll Like Receptor 5 (TLR5) Cascade	-3.14157	-1.04774	6/85	1432,5594,5601,7100,23118,257397	MAPK14,MAPK1,MAPK9,TLR5,TAB2,TAB3
6_Member	Reactome Gene Sets	R-HSA-975871	MyD88 cascade initiated on plasma membrane	-3.14157	-1.04774	6/85	1432,5594,5601,7100,23118,257397	MAPK14,MAPK1,MAPK9,TLR5,TAB2,TAB3
6_Member	WikiPathways	WP4666	Hepatitis B infection	-3.11229	-1.02805	8/154	843,1432,5594,5601,5603,6778,7529,23118	CASP10,MAPK14,MAPK1,MAPK9,MAPK13,STAT6,YWHAB,TAB2
6_Member	KEGG Pathway	hsa04071	Sphingolipid signaling pathway	-3.102	-1.02248	7/119	1432,1901,5594,5601,5603,5879,259230	MAPK14,S1PR1,MAPK1,MAPK9,MAPK13,RAC1,SGMS1
6_Member	KEGG Pathway	hsa04722	Neurotrophin signaling pathway	-3.102	-1.02248	7/119	1432,5594,5601,5603,5879,5906,11213	MAPK14,MAPK1,MAPK9,MAPK13,RAC1,RAP1A,IRAK3
6_Member	Canonical Pathways	M12705	SIG CD40PATHWAYMAP	-3.07165	-1.00372	4/34	1432,5594,5601,5603	MAPK14,MAPK1,MAPK9,MAPK13
6_Member	KEGG Pathway	hsa04370	VEGF signaling pathway	-3.05577	-1.00134	5/59	1432,5594,5603,5879,8605	MAPK14,MAPK1,MAPK13,RAC1,PLA2G4C
6_Member	WikiPathways	WP3865	Novel intracellular components of RIG-I-like receptor (RLR) pathway	-2.98973	-0.965262	5/61	843,1432,5601,5603,7706	CASP10,MAPK14,MAPK9,MAPK13,TRIM25
6_Member	WikiPathways	WP4542	Overview of leukocyte-intrinsic Hippo pathway functions	-2.97638	-0.96093	4/36	1432,2308,5879,5906	MAPK14,FOXO1,RAC1,RAP1A
6_Member	WikiPathways	WP4877	Host-pathogen interaction of human coronaviruses - MAPK signaling	-2.97638	-0.96093	4/36	1432,5594,5601,5603	MAPK14,MAPK1,MAPK9,MAPK13
6_Member	KEGG Pathway	hsa05161	Hepatitis B	-2.9698	-0.957573	8/162	843,1432,5594,5601,5603,6778,7529,23118	CASP10,MAPK14,MAPK1,MAPK9,MAPK13,STAT6,YWHAB,TAB2
6_Member	KEGG Pathway	hsa04912	GnRH signaling pathway	-2.93672	-0.931681	6/93	1432,4313,5594,5601,5603,8605	MAPK14,MMP2,MAPK1,MAPK9,MAPK13,PLA2G4C
6_Member	Reactome Gene Sets	R-HSA-168638	NOD1/2 Signaling Pathway	-2.93098	-0.931681	4/37	1432,5603,23118,257397	MAPK14,MAPK13,TAB2,TAB3
6_Member	Reactome Gene Sets	R-HSA-450294	MAP kinase activation	-2.8953	-0.912222	5/64	1432,5594,5601,23118,257397	MAPK14,MAPK1,MAPK9,TAB2,TAB3
6_Member	KEGG Pathway	hsa04010	MAPK signaling pathway	-2.8705	-0.894879	11/294	1432,2254,5594,5601,5603,5879,5906,8605,8913,23118,93589	MAPK14,FGF9,MAPK1,MAPK9,MAPK13,RAC1,RAP1A,PLA2G4C,CACNA1G,TAB2,CACNA2D4
6_Member	WikiPathways	WP366	TGF-beta signaling pathway	-2.82025	-0.861742	7/133	1432,5594,5601,5879,6935,8462,8554	MAPK14,MAPK1,MAPK9,RAC1,ZEB1,KLF11,PIAS1
6_Member	WikiPathways	WP23	B cell receptor signaling pathway	-2.81926	-0.861742	6/98	1432,2308,5594,5601,5879,8462	MAPK14,FOXO1,MAPK1,MAPK9,RAC1,KLF11
6_Member	Reactome Gene Sets	R-HSA-166016	Toll Like Receptor 4 (TLR4) Cascade	-2.78306	-0.844619	7/135	1432,5594,5601,11213,23118,26052,257397	MAPK14,MAPK1,MAPK9,IRAK3,TAB2,DNM3,TAB3
6_Member	Reactome Gene Sets	R-HSA-166058	MyD88:MAL(TIRAP) cascade initiated on plasma membrane	-2.75226	-0.825721	6/101	1432,5594,5601,11213,23118,257397	MAPK14,MAPK1,MAPK9,IRAK3,TAB2,TAB3
6_Member	Reactome Gene Sets	R-HSA-168188	Toll Like Receptor TLR6:TLR2 Cascade	-2.75226	-0.825721	6/101	1432,5594,5601,11213,23118,257397	MAPK14,MAPK1,MAPK9,IRAK3,TAB2,TAB3
6_Member	KEGG Pathway	hsa05135	Yersinia infection	-2.74657	-0.82313	7/137	1432,3676,5594,5601,5603,5879,23118	MAPK14,ITGA4,MAPK1,MAPK9,MAPK13,RAC1,TAB2
6_Member	WikiPathways	WP2036	TNF-related weak inducer of apoptosis (TWEAK) signaling pathway	-2.7233	-0.814083	4/42	1432,5594,5601,5879	MAPK14,MAPK1,MAPK9,RAC1
6_Member	KEGG Pathway	hsa04622	RIG-I-like receptor signaling pathway	-2.72122	-0.814083	5/70	843,1432,5601,5603,7706	CASP10,MAPK14,MAPK9,MAPK13,TRIM25
6_Member	KEGG Pathway	hsa04917	Prolactin signaling pathway	-2.72122	-0.814083	5/70	1432,5594,5601,5603,5618	MAPK14,MAPK1,MAPK9,MAPK13,PRLR
6_Member	KEGG Pathway	hsa05120	Epithelial cell signaling in Helicobacter pylori infection	-2.72122	-0.814083	5/70	102,1432,5601,5603,5879	ADAM10,MAPK14,MAPK9,MAPK13,RAC1
6_Member	Reactome Gene Sets	R-HSA-167044	Signalling to RAS	-2.71672	-0.814083	3/20	1432,5603,5898	MAPK14,MAPK13,RALA
6_Member	Reactome Gene Sets	R-HSA-168179	Toll Like Receptor TLR1:TLR2 Cascade	-2.68766	-0.797345	6/104	1432,5594,5601,11213,23118,257397	MAPK14,MAPK1,MAPK9,IRAK3,TAB2,TAB3
6_Member	Reactome Gene Sets	R-HSA-181438	Toll Like Receptor 2 (TLR2) Cascade	-2.68766	-0.797345	6/104	1432,5594,5601,11213,23118,257397	MAPK14,MAPK1,MAPK9,IRAK3,TAB2,TAB3
6_Member	Reactome Gene Sets	R-HSA-448424	Interleukin-17 signaling	-2.66711	-0.783851	5/72	1432,5594,5601,23118,257397	MAPK14,MAPK1,MAPK9,TAB2,TAB3
6_Member	Canonical Pathways	M103	PID S1P S1P1 PATHWAY	-2.65382	-0.776954	3/21	1901,5594,5879	S1PR1,MAPK1,RAC1
6_Member	GO Biological Processes	GO:0018105	peptidyl-serine phosphorylation	-2.63564	-0.761716	8/183	1195,1432,5593,5594,5601,5603,11329,65125	CLK1,MAPK14,PRKG2,MAPK1,MAPK9,MAPK13,STK38,WNK1
6_Member	WikiPathways	WP2037	Prolactin signaling pathway	-2.5641	-0.72061	5/76	1432,5594,5601,5618,5879	MAPK14,MAPK1,MAPK9,PRLR,RAC1
6_Member	Canonical Pathways	M183	PID IL6 7 PATHWAY	-2.54231	-0.705388	4/47	1432,2308,5879,8554	MAPK14,FOXO1,RAC1,PIAS1
6_Member	WikiPathways	WP2203	Thymic stromal lymphopoietin (TSLP) signaling pathway	-2.54231	-0.705388	4/47	1432,5594,5601,6778	MAPK14,MAPK1,MAPK9,STAT6
6_Member	KEGG Pathway	hsa05140	Leishmaniasis	-2.53936	-0.705388	5/77	1432,3676,5594,5603,23118	MAPK14,ITGA4,MAPK1,MAPK13,TAB2
6_Member	Reactome Gene Sets	R-HSA-450321	JNK (c-Jun kinases) phosphorylation and activation mediated by activated human TAK1	-2.53753	-0.705388	3/23	5601,23118,257397	MAPK9,TAB2,TAB3
6_Member	WikiPathways	WP712	Estrogen signaling pathway	-2.53753	-0.705388	3/23	1432,5594,5601	MAPK14,MAPK1,MAPK9
6_Member	KEGG Pathway	hsa05145	Toxoplasmosis	-2.52616	-0.699304	6/112	1432,3910,5594,5601,5603,23118	MAPK14,LAMA4,MAPK1,MAPK9,MAPK13,TAB2
6_Member	Canonical Pathways	M268	PID S1P S1P2 PATHWAY	-2.48357	-0.669636	3/24	1432,5594,5879	MAPK14,MAPK1,RAC1
6_Member	Reactome Gene Sets	R-HSA-450302	activated TAK1 mediates p38 MAPK activation	-2.48357	-0.669636	3/24	1432,23118,257397	MAPK14,TAB2,TAB3
6_Member	Reactome Gene Sets	R-HSA-5668599	RHO GTPases Activate NADPH Oxidases	-2.48357	-0.669636	3/24	1432,5594,5879	MAPK14,MAPK1,RAC1
6_Member	WikiPathways	WP1984	Integrated breast cancer pathway	-2.44624	-0.639881	7/155	2308,5594,5879,5898,5906,8554,140739	FOXO1,MAPK1,RAC1,RALA,RAP1A,PIAS1,UBE2F
6_Member	Canonical Pathways	M274	PID LYMPH ANGIOGENESIS PATHWAY	-2.43208	-0.634439	3/25	1432,3676,5594	MAPK14,ITGA4,MAPK1
6_Member	WikiPathways	WP1528	Physiological and pathological hypertrophy of the heart	-2.43208	-0.634439	3/25	1432,5594,5879	MAPK14,MAPK1,RAC1
6_Member	Canonical Pathways	M20	PID P38 MKK3 6PATHWAY	-2.38286	-0.603205	3/26	1432,5879,23118	MAPK14,RAC1,TAB2
6_Member	WikiPathways	WP2035	Follicle stimulating hormone (FSH) signaling pathway	-2.33574	-0.570221	3/27	1432,2308,5594	MAPK14,FOXO1,MAPK1
6_Member	GO Biological Processes	GO:0018209	peptidyl-serine modification	-2.32385	-0.565503	8/206	1195,1432,5593,5594,5601,5603,11329,65125	CLK1,MAPK14,PRKG2,MAPK1,MAPK9,MAPK13,STK38,WNK1
6_Member	WikiPathways	WP585	Interferon type I signaling pathways	-2.29489	-0.54374	4/55	1432,5879,5906,8554	MAPK14,RAC1,RAP1A,PIAS1
6_Member	KEGG Pathway	hsa05170	Human immunodeficiency virus 1 infection	-2.25028	-0.517705	8/212	1073,1432,5594,5601,5603,5879,10681,23118	CFL2,MAPK14,MAPK1,MAPK9,MAPK13,RAC1,GNB5,TAB2
6_Member	Canonical Pathways	M55	PID S1P S1P3 PATHWAY	-2.24714	-0.517453	3/29	1901,5594,5879	S1PR1,MAPK1,RAC1
6_Member	KEGG Pathway	hsa04380	Osteoclast differentiation	-2.24296	-0.515368	6/128	1432,5594,5601,5603,5879,23118	MAPK14,MAPK1,MAPK9,MAPK13,RAC1,TAB2
6_Member	Reactome Gene Sets	R-HSA-975138	TRAF6 mediated induction of NFkB and MAP kinases upon TLR7/8 or 9 activation	-2.22935	-0.506923	5/91	1432,5594,5601,23118,257397	MAPK14,MAPK1,MAPK9,TAB2,TAB3
6_Member	KEGG Pathway	hsa04926	Relaxin signaling pathway	-2.22678	-0.506436	6/129	1432,4313,5594,5601,5603,10681	MAPK14,MMP2,MAPK1,MAPK9,MAPK13,GNB5
6_Member	Reactome Gene Sets	R-HSA-975155	MyD88 dependent cascade initiated on endosome	-2.20948	-0.495254	5/92	1432,5594,5601,23118,257397	MAPK14,MAPK1,MAPK9,TAB2,TAB3
6_Member	KEGG Pathway	hsa04658	Th1 and Th2 cell differentiation	-2.20948	-0.495254	5/92	1432,5594,5601,5603,6778	MAPK14,MAPK1,MAPK9,MAPK13,STAT6
6_Member	Canonical Pathways	M76	PID P38 ALPHA BETA PATHWAY	-2.2054	-0.494197	3/30	1432,5879,5898	MAPK14,RAC1,RALA
6_Member	KEGG Pathway	hsa04068	FoxO signaling pathway	-2.19491	-0.48571	6/131	1432,1901,2308,5594,5601,5603	MAPK14,S1PR1,FOXO1,MAPK1,MAPK9,MAPK13
6_Member	Reactome Gene Sets	R-HSA-168181	Toll Like Receptor 7/8 (TLR7/8) Cascade	-2.18988	-0.48268	5/93	1432,5594,5601,23118,257397	MAPK14,MAPK1,MAPK9,TAB2,TAB3
6_Member	WikiPathways	WP2355	Corticotropin-releasing hormone signaling pathway	-2.18988	-0.48268	5/93	1432,5594,5601,9095,10681	MAPK14,MAPK1,MAPK9,TBX19,GNB5
6_Member	Canonical Pathways	M166	PID ATF2 PATHWAY	-2.18658	-0.482364	4/59	1432,4313,5594,5601	MAPK14,MMP2,MAPK1,MAPK9
6_Member	Reactome Gene Sets	R-HSA-168164	Toll Like Receptor 3 (TLR3) Cascade	-2.17054	-0.47211	5/94	1432,5594,5601,23118,257397	MAPK14,MAPK1,MAPK9,TAB2,TAB3
6_Member	WikiPathways	WP231	TNF-alpha signaling pathway	-2.17054	-0.47211	5/94	5594,5601,5879,23118,257397	MAPK1,MAPK9,RAC1,TAB2,TAB3
6_Member	Canonical Pathways	M63	PID AVB3 OPN PATHWAY	-2.16521	-0.47211	3/31	4313,5594,5879	MMP2,MAPK1,RAC1
6_Member	Reactome Gene Sets	R-HSA-450282	MAPK targets/ Nuclear events mediated by MAP kinases	-2.16521	-0.47211	3/31	1432,5594,5601	MAPK14,MAPK1,MAPK9
6_Member	Reactome Gene Sets	R-HSA-2454202	Fc epsilon receptor (FCERI) signaling	-2.14826	-0.463389	6/134	5594,5601,5711,5879,23118,257397	MAPK1,MAPK9,PSMD5,RAC1,TAB2,TAB3
6_Member	Reactome Gene Sets	R-HSA-168138	Toll Like Receptor 9 (TLR9) Cascade	-2.13261	-0.456275	5/96	1432,5594,5601,23118,257397	MAPK14,MAPK1,MAPK9,TAB2,TAB3
6_Member	Canonical Pathways	M108	PID NETRIN PATHWAY	-2.12647	-0.456275	3/32	5306,5594,5879	PITPNA,MAPK1,RAC1
6_Member	Canonical Pathways	M23	PID WNT NONCANONICAL PATHWAY	-2.12647	-0.456275	3/32	5601,5879,23118	MAPK9,RAC1,TAB2
6_Member	Reactome Gene Sets	R-HSA-2871796	FCERI mediated MAPK activation	-2.12647	-0.456275	3/32	5594,5601,5879	MAPK1,MAPK9,RAC1
6_Member	KEGG Pathway	hsa01522	Endocrine resistance	-2.09567	-0.434726	5/98	1432,4313,5594,5601,5603	MAPK14,MMP2,MAPK1,MAPK9,MAPK13
6_Member	KEGG Pathway	hsa04750	Inflammatory mediator regulation of TRP channels	-2.09567	-0.434726	5/98	1432,5601,5603,8605,162514	MAPK14,MAPK9,MAPK13,PLA2G4C,TRPV3
6_Member	WikiPathways	WP4481	Resistin as a regulator of inflammation	-2.08909	-0.433728	3/33	1432,5594,51196	MAPK14,MAPK1,PLCE1
6_Member	Canonical Pathways	M10	PID BCR 5PATHWAY	-2.08669	-0.433728	4/63	971,1432,5594,5879	CD72,MAPK14,MAPK1,RAC1
6_Member	Reactome Gene Sets	R-HSA-166166	MyD88-independent TLR4 cascade	-2.07755	-0.428966	5/99	1432,5594,5601,23118,257397	MAPK14,MAPK1,MAPK9,TAB2,TAB3
6_Member	Reactome Gene Sets	R-HSA-937061	TRIF(TICAM1)-mediated TLR4 signaling	-2.07755	-0.428966	5/99	1432,5594,5601,23118,257397	MAPK14,MAPK1,MAPK9,TAB2,TAB3
6_Member	KEGG Pathway	hsa05418	Fluid shear stress and atherosclerosis	-2.07348	-0.426636	6/139	1432,2949,4313,5601,5603,5879	MAPK14,GSTM5,MMP2,MAPK9,MAPK13,RAC1
6_Member	GO Biological Processes	GO:0051403	stress-activated MAPK cascade	-2.0629	-0.418641	4/64	1432,5594,5601,5603	MAPK14,MAPK1,MAPK9,MAPK13
6_Member	Canonical Pathways	M270	PID MAPK TRK PATHWAY	-2.05298	-0.413863	3/34	1432,5594,5906	MAPK14,MAPK1,RAP1A
6_Member	KEGG Pathway	hsa05171	Coronavirus disease - COVID-19	-2.02472	-0.396369	8/232	717,1432,4600,4939,5594,5601,5603,23118	C2,MAPK14,MX2,OAS2,MAPK1,MAPK9,MAPK13,TAB2
6_Member	KEGG Pathway	hsa04914	Progesterone-mediated oocyte maturation	-2.02455	-0.396369	5/102	1432,5241,5594,5601,5603	MAPK14,PGR,MAPK1,MAPK9,MAPK13
6_Member	WikiPathways	WP244	Alpha 6 beta 4 signaling pathway	-2.01807	-0.39585	3/35	1432,5594,5879	MAPK14,MAPK1,RAC1
7_Summary	Reactome Gene Sets	R-HSA-76002	Platelet activation, signaling and aggregation	-5.14943	-1.75699	14/263	150,334,710,813,1432,1893,2157,5028,5594,5879,5906,10681,54518,135228,490,3676,5593,5670,5673,9371	ADRA2A,APLP2,SERPING1,CALU,MAPK14,ECM1,F8,P2RY1,MAPK1,RAC1,RAP1A,GNB5,APBB1IP,CD109,ATP2B1,ITGA4,PRKG2,PSG2,PSG5,KIF3B
7_Member	Reactome Gene Sets	R-HSA-76002	Platelet activation, signaling and aggregation	-5.14943	-1.75699	14/263	150,334,710,813,1432,1893,2157,5028,5594,5879,5906,10681,54518,135228	ADRA2A,APLP2,SERPING1,CALU,MAPK14,ECM1,F8,P2RY1,MAPK1,RAC1,RAP1A,GNB5,APBB1IP,CD109
7_Member	Reactome Gene Sets	R-HSA-109582	Hemostasis	-3.86414	-1.30984	20/621	150,334,490,710,813,1432,1893,2157,3676,5028,5593,5594,5670,5673,5879,5906,9371,10681,54518,135228	ADRA2A,APLP2,ATP2B1,SERPING1,CALU,MAPK14,ECM1,F8,ITGA4,P2RY1,PRKG2,MAPK1,PSG2,PSG5,RAC1,RAP1A,KIF3B,GNB5,APBB1IP,CD109
7_Member	Reactome Gene Sets	R-HSA-114608	Platelet degranulation	-2.22678	-0.506436	6/129	334,710,813,1893,2157,135228	APLP2,SERPING1,CALU,ECM1,F8,CD109
7_Member	Reactome Gene Sets	R-HSA-76005	Response to elevated platelet cytosolic Ca2+	-2.14826	-0.463389	6/134	334,710,813,1893,2157,135228	APLP2,SERPING1,CALU,ECM1,F8,CD109
8_Summary	GO Biological Processes	GO:0007167	enzyme linked receptor protein signaling pathway	-5.03138	-1.72609	22/601	94,1176,1432,2254,2280,2308,2331,2530,2660,3696,4313,4653,5166,5594,5618,5879,6778,9404,10006,51196,51552,55198	ACVRL1,AP3S1,MAPK14,FGF9,FKBP1A,FOXO1,FMOD,FUT8,MSTN,ITGB8,MMP2,MYOC,PDK4,MAPK1,PRLR,RAC1,STAT6,LPXN,ABI1,PLCE1,RAB14,APPL2
8_Member	GO Biological Processes	GO:0007167	enzyme linked receptor protein signaling pathway	-5.03138	-1.72609	22/601	94,1176,1432,2254,2280,2308,2331,2530,2660,3696,4313,4653,5166,5594,5618,5879,6778,9404,10006,51196,51552,55198	ACVRL1,AP3S1,MAPK14,FGF9,FKBP1A,FOXO1,FMOD,FUT8,MSTN,ITGB8,MMP2,MYOC,PDK4,MAPK1,PRLR,RAC1,STAT6,LPXN,ABI1,PLCE1,RAB14,APPL2
8_Member	GO Biological Processes	GO:0007169	transmembrane receptor protein tyrosine kinase signaling pathway	-3.18499	-1.07662	14/403	1176,1432,2254,2308,4313,4653,5166,5594,5618,5879,6778,10006,51196,51552	AP3S1,MAPK14,FGF9,FOXO1,MMP2,MYOC,PDK4,MAPK1,PRLR,RAC1,STAT6,ABI1,PLCE1,RAB14
9_Summary	GO Biological Processes	GO:0008154	actin polymerization or depolymerization	-4.94052	-1.67302	7/61	822,1073,5879,8936,9051,10006,11170,1432,5601,3676,4620,5594,8605,50807,150,5898,5906,9411,51196,58480,5603	CAPG,CFL2,RAC1,WASF1,PSTPIP1,ABI1,FAM107A,MAPK14,MAPK9,ITGA4,MYH2,MAPK1,PLA2G4C,ASAP1,ADRA2A,RALA,RAP1A,ARHGAP29,PLCE1,RHOU,MAPK13
9_Member	GO Biological Processes	GO:0008154	actin polymerization or depolymerization	-4.94052	-1.67302	7/61	822,1073,5879,8936,9051,10006,11170	CAPG,CFL2,RAC1,WASF1,PSTPIP1,ABI1,FAM107A
9_Member	Canonical Pathways	M278	PID RAC1 PATHWAY	-3.23301	-1.07662	5/54	1432,5601,5879,8936,10006	MAPK14,MAPK9,RAC1,WASF1,ABI1
9_Member	Canonical Pathways	M277	PID INTEGRIN A4B1 PATHWAY	-3.12172	-1.03271	4/33	3676,4620,5879,10006	ITGA4,MYH2,RAC1,ABI1
9_Member	Reactome Gene Sets	R-HSA-9664407	Parasite infection	-3.05577	-1.00134	5/59	4620,5594,5879,8936,10006	MYH2,MAPK1,RAC1,WASF1,ABI1
9_Member	Reactome Gene Sets	R-HSA-9664417	Leishmania phagocytosis	-3.05577	-1.00134	5/59	4620,5594,5879,8936,10006	MYH2,MAPK1,RAC1,WASF1,ABI1
9_Member	Reactome Gene Sets	R-HSA-9664422	FCGR3A-mediated phagocytosis	-3.05577	-1.00134	5/59	4620,5594,5879,8936,10006	MYH2,MAPK1,RAC1,WASF1,ABI1
9_Member	GO Biological Processes	GO:0030041	actin filament polymerization	-3.02324	-0.984052	4/35	5879,8936,9051,11170	RAC1,WASF1,PSTPIP1,FAM107A
9_Member	Reactome Gene Sets	R-HSA-2029482	Regulation of actin dynamics for phagocytic cup formation	-2.98973	-0.965262	5/61	4620,5594,5879,8936,10006	MYH2,MAPK1,RAC1,WASF1,ABI1
9_Member	Reactome Gene Sets	R-HSA-5663213	RHO GTPases Activate WASPs and WAVEs	-2.97638	-0.96093	4/36	5594,5879,8936,10006	MAPK1,RAC1,WASF1,ABI1
9_Member	KEGG Pathway	hsa04666	Fc gamma R-mediated phagocytosis	-2.84216	-0.877489	6/97	1073,5594,5879,8605,8936,50807	CFL2,MAPK1,RAC1,PLA2G4C,WASF1,ASAP1
9_Member	GO Biological Processes	GO:0007265	Ras protein signal transduction	-2.56351	-0.72061	8/188	150,5879,5898,5906,8936,9411,51196,58480	ADRA2A,RAC1,RALA,RAP1A,WASF1,ARHGAP29,PLCE1,RHOU
9_Member	GO Biological Processes	GO:0016601	Rac protein signal transduction	-2.53753	-0.705388	3/23	5879,8936,58480	RAC1,WASF1,RHOU
9_Member	Reactome Gene Sets	R-HSA-2029480	Fcgamma receptor (FCGR) dependent phagocytosis	-2.33292	-0.569433	5/86	4620,5594,5879,8936,10006	MYH2,MAPK1,RAC1,WASF1,ABI1
9_Member	KEGG Pathway	hsa05231	Choline metabolism in cancer	-2.09567	-0.434726	5/98	5594,5601,5879,8605,8936	MAPK1,MAPK9,RAC1,PLA2G4C,WASF1
9_Member	Reactome Gene Sets	R-HSA-4420097	VEGFA-VEGFR2 Pathway	-2.07755	-0.428966	5/99	1432,5603,5879,8936,10006	MAPK14,MAPK13,RAC1,WASF1,ABI1
9_Member	Canonical Pathways	M16801	SIG REGULATION OF THE ACTIN CYTOSKELETON BY RHO GTPASES	-2.01807	-0.39585	3/35	1073,4620,8936	CFL2,MYH2,WASF1
10_Summary	WikiPathways	WP3888	VEGFA-VEGFR2 signaling pathway	-4.86341	-1.66249	18/439	102,813,1432,1901,2308,4313,5322,5594,5601,5654,5879,5906,6778,8867,8936,9209,57007,84952,825,2882,5603,6780	ADAM10,CALU,MAPK14,S1PR1,FOXO1,MMP2,PLA2G5,MAPK1,MAPK9,HTRA1,RAC1,RAP1A,STAT6,SYNJ1,WASF1,LRRFIP2,ACKR3,CGNL1,CAPN3,GPX7,MAPK13,STAU1
10_Member	WikiPathways	WP3888	VEGFA-VEGFR2 signaling pathway	-4.86341	-1.66249	18/439	102,813,1432,1901,2308,4313,5322,5594,5601,5654,5879,5906,6778,8867,8936,9209,57007,84952	ADAM10,CALU,MAPK14,S1PR1,FOXO1,MMP2,PLA2G5,MAPK1,MAPK9,HTRA1,RAC1,RAP1A,STAT6,SYNJ1,WASF1,LRRFIP2,ACKR3,CGNL1
10_Member	GO Biological Processes	GO:0062197	cellular response to chemical stress	-2.23708	-0.512608	9/259	825,2308,2882,4313,5594,5601,5603,6778,6780	CAPN3,FOXO1,GPX7,MMP2,MAPK1,MAPK9,MAPK13,STAT6,STAU1
10_Member	GO Biological Processes	GO:0034599	cellular response to oxidative stress	-2.17955	-0.476958	8/218	2308,2882,4313,5594,5601,5603,6778,6780	FOXO1,GPX7,MMP2,MAPK1,MAPK9,MAPK13,STAT6,STAU1
11_Summary	GO Biological Processes	GO:0060627	regulation of vesicle-mediated transport	-4.8254	-1.66249	20/529	150,717,3598,3745,5028,5322,5594,5879,5898,5906,8674,8724,8867,8913,10015,23086,23621,27342,55198,79872,3952,4129,9341,65125,4939,5066,55737,55763,114899,284021	ADRA2A,C2,IL13RA2,KCNB1,P2RY1,PLA2G5,MAPK1,RAC1,RALA,RAP1A,VAMP4,SNX3,SYNJ1,CACNA1G,PDCD6IP,EXPH5,BACE1,RABGEF1,APPL2,CBLL1,LEP,MAOB,VAMP3,WNK1,OAS2,PAM,VPS35,EXOC1,C1QTNF3,MILR1
11_Member	GO Biological Processes	GO:0060627	regulation of vesicle-mediated transport	-4.8254	-1.66249	20/529	150,717,3598,3745,5028,5322,5594,5879,5898,5906,8674,8724,8867,8913,10015,23086,23621,27342,55198,79872	ADRA2A,C2,IL13RA2,KCNB1,P2RY1,PLA2G5,MAPK1,RAC1,RALA,RAP1A,VAMP4,SNX3,SYNJ1,CACNA1G,PDCD6IP,EXPH5,BACE1,RABGEF1,APPL2,CBLL1
11_Member	GO Biological Processes	GO:0051048	negative regulation of secretion	-4.26626	-1.41094	10/167	150,3598,3745,3952,4129,5028,5906,9341,27342,65125	ADRA2A,IL13RA2,KCNB1,LEP,MAOB,P2RY1,RAP1A,VAMP3,RABGEF1,WNK1
11_Member	GO Biological Processes	GO:0017157	regulation of exocytosis	-4.22007	-1.37973	11/204	150,3598,3745,5028,5898,5906,8913,10015,23086,23621,27342	ADRA2A,IL13RA2,KCNB1,P2RY1,RALA,RAP1A,CACNA1G,PDCD6IP,EXPH5,BACE1,RABGEF1
11_Member	GO Biological Processes	GO:1903531	negative regulation of secretion by cell	-4.06064	-1.37825	9/143	150,3598,3745,3952,4129,5028,5906,9341,27342	ADRA2A,IL13RA2,KCNB1,LEP,MAOB,P2RY1,RAP1A,VAMP3,RABGEF1
11_Member	GO Biological Processes	GO:0051046	regulation of secretion	-4.00573	-1.37825	20/606	150,3598,3745,3952,4129,4939,5028,5066,5898,5906,8913,9341,10015,23086,23621,27342,55737,55763,65125,114899	ADRA2A,IL13RA2,KCNB1,LEP,MAOB,OAS2,P2RY1,PAM,RALA,RAP1A,CACNA1G,VAMP3,PDCD6IP,EXPH5,BACE1,RABGEF1,VPS35,EXOC1,WNK1,C1QTNF3
11_Member	GO Biological Processes	GO:1903530	regulation of secretion by cell	-3.627	-1.22977	18/549	150,3598,3745,3952,4129,5028,5066,5898,5906,8913,9341,10015,23086,23621,27342,55737,55763,114899	ADRA2A,IL13RA2,KCNB1,LEP,MAOB,P2RY1,PAM,RALA,RAP1A,CACNA1G,VAMP3,PDCD6IP,EXPH5,BACE1,RABGEF1,VPS35,EXOC1,C1QTNF3
11_Member	GO Biological Processes	GO:1903306	negative regulation of regulated secretory pathway	-3.59714	-1.21893	4/25	150,3598,5906,27342	ADRA2A,IL13RA2,RAP1A,RABGEF1
11_Member	GO Biological Processes	GO:1903305	regulation of regulated secretory pathway	-3.38587	-1.13956	8/140	150,3598,3745,5028,5906,8913,23621,27342	ADRA2A,IL13RA2,KCNB1,P2RY1,RAP1A,CACNA1G,BACE1,RABGEF1
11_Member	GO Biological Processes	GO:0014061	regulation of norepinephrine secretion	-3.18823	-1.07662	3/14	150,3745,5028	ADRA2A,KCNB1,P2RY1
11_Member	GO Biological Processes	GO:0033004	negative regulation of mast cell activation	-3.18823	-1.07662	3/14	3598,27342,284021	IL13RA2,RABGEF1,MILR1
11_Member	GO Biological Processes	GO:0045920	negative regulation of exocytosis	-3.02324	-0.984052	4/35	150,3598,5906,27342	ADRA2A,IL13RA2,RAP1A,RABGEF1
11_Member	GO Biological Processes	GO:0051953	negative regulation of amine transport	-2.33574	-0.570221	3/27	150,3952,5028	ADRA2A,LEP,P2RY1
11_Member	GO Biological Processes	GO:2000300	regulation of synaptic vesicle exocytosis	-2.26696	-0.526654	4/56	150,5028,5906,23621	ADRA2A,P2RY1,RAP1A,BACE1
11_Member	GO Biological Processes	GO:1903532	positive regulation of secretion by cell	-2.08393	-0.431853	9/274	3745,3952,5028,8913,10015,23086,55737,55763,114899	KCNB1,LEP,P2RY1,CACNA1G,PDCD6IP,EXPH5,VPS35,EXOC1,C1QTNF3
12_Summary	GO Biological Processes	GO:0097581	lamellipodium organization	-4.80506	-1.66249	6/43	1901,5879,8936,10006,22885,23380,822,5376,9371,22832,23322,23639,26052,50807,57562,58480,79738,79864	S1PR1,RAC1,WASF1,ABI1,ABLIM3,SRGAP2,CAPG,PMP22,KIF3B,CEP162,RPGRIP1L,DNAAF11,DNM3,ASAP1,CEP126,RHOU,BBS10,JHY
12_Member	GO Biological Processes	GO:0097581	lamellipodium organization	-4.80506	-1.66249	6/43	1901,5879,8936,10006,22885,23380	S1PR1,RAC1,WASF1,ABI1,ABLIM3,SRGAP2
12_Member	GO Biological Processes	GO:0030031	cell projection assembly	-4.0732	-1.37973	16/415	822,1901,5376,5879,9371,22832,22885,23322,23380,23639,26052,50807,57562,58480,79738,79864	CAPG,S1PR1,PMP22,RAC1,KIF3B,CEP162,ABLIM3,RPGRIP1L,SRGAP2,DNAAF11,DNM3,ASAP1,CEP126,RHOU,BBS10,JHY
12_Member	GO Biological Processes	GO:0120031	plasma membrane bounded cell projection assembly	-3.22717	-1.07662	14/399	1901,5376,5879,9371,22832,22885,23322,23380,23639,26052,50807,57562,79738,79864	S1PR1,PMP22,RAC1,KIF3B,CEP162,ABLIM3,RPGRIP1L,SRGAP2,DNAAF11,DNM3,ASAP1,CEP126,BBS10,JHY
12_Member	GO Biological Processes	GO:0030032	lamellipodium assembly	-3.02324	-0.984052	4/35	1901,5879,22885,23380	S1PR1,RAC1,ABLIM3,SRGAP2
13_Summary	GO Biological Processes	GO:0070848	response to growth factor	-4.72686	-1.62129	19/493	94,1432,2254,2331,2530,2660,3696,5028,5594,5782,5906,6935,8936,9404,9638,11075,25778,51552,55198,2280	ACVRL1,MAPK14,FGF9,FMOD,FUT8,MSTN,ITGB8,P2RY1,MAPK1,PTPN12,RAP1A,ZEB1,WASF1,LPXN,FEZ1,STMN2,DSTYK,RAB14,APPL2,FKBP1A
13_Member	GO Biological Processes	GO:0070848	response to growth factor	-4.72686	-1.62129	19/493	94,1432,2254,2331,2530,2660,3696,5028,5594,5782,5906,6935,8936,9404,9638,11075,25778,51552,55198	ACVRL1,MAPK14,FGF9,FMOD,FUT8,MSTN,ITGB8,P2RY1,MAPK1,PTPN12,RAP1A,ZEB1,WASF1,LPXN,FEZ1,STMN2,DSTYK,RAB14,APPL2
13_Member	GO Biological Processes	GO:0071363	cellular response to growth factor stimulus	-4.02226	-1.37825	17/464	94,1432,2254,2331,2530,2660,3696,5782,5906,6935,8936,9404,9638,11075,25778,51552,55198	ACVRL1,MAPK14,FGF9,FMOD,FUT8,MSTN,ITGB8,PTPN12,RAP1A,ZEB1,WASF1,LPXN,FEZ1,STMN2,DSTYK,RAB14,APPL2
13_Member	GO Biological Processes	GO:0007179	transforming growth factor beta receptor signaling pathway	-3.72414	-1.26528	7/94	94,2331,2530,2660,3696,9404,55198	ACVRL1,FMOD,FUT8,MSTN,ITGB8,LPXN,APPL2
13_Member	GO Biological Processes	GO:0007178	transmembrane receptor protein serine/threonine kinase signaling pathway	-3.21121	-1.07662	9/186	94,1432,2280,2331,2530,2660,3696,9404,55198	ACVRL1,MAPK14,FKBP1A,FMOD,FUT8,MSTN,ITGB8,LPXN,APPL2
13_Member	GO Biological Processes	GO:0071560	cellular response to transforming growth factor beta stimulus	-3.18714	-1.07662	8/150	94,2331,2530,2660,3696,6935,9404,55198	ACVRL1,FMOD,FUT8,MSTN,ITGB8,ZEB1,LPXN,APPL2
13_Member	GO Biological Processes	GO:0071559	response to transforming growth factor beta	-3.05777	-1.00134	8/157	94,2331,2530,2660,3696,6935,9404,55198	ACVRL1,FMOD,FUT8,MSTN,ITGB8,ZEB1,LPXN,APPL2
14_Summary	CORUM	CORUM:343	Sarcoglycan-sarcospan complex SG-SPN	-4.7127	-1.62129	3/5	6443,6444,6445,3676,3696,93589,5594,7100,5879	SGCB,SGCD,SGCG,ITGA4,ITGB8,CACNA2D4,MAPK1,TLR5,RAC1
14_Member	CORUM	CORUM:343	Sarcoglycan-sarcospan complex SG-SPN	-4.7127	-1.62129	3/5	6443,6444,6445	SGCB,SGCD,SGCG
14_Member	WikiPathways	WP2118	Arrhythmogenic right ventricular cardiomyopathy	-3.40167	-1.142	6/76	3676,3696,6443,6444,6445,93589	ITGA4,ITGB8,SGCB,SGCD,SGCG,CACNA2D4
14_Member	KEGG Pathway	hsa05412	Arrhythmogenic right ventricular cardiomyopathy	-3.371	-1.13397	6/77	3676,3696,6443,6444,6445,93589	ITGA4,ITGB8,SGCB,SGCD,SGCG,CACNA2D4
14_Member	KEGG Pathway	hsa05410	Hypertrophic cardiomyopathy	-3.01095	-0.974318	6/90	3676,3696,6443,6444,6445,93589	ITGA4,ITGB8,SGCB,SGCD,SGCG,CACNA2D4
14_Member	KEGG Pathway	hsa05414	Dilated cardiomyopathy	-2.86534	-0.893446	6/96	3676,3696,6443,6444,6445,93589	ITGA4,ITGB8,SGCB,SGCD,SGCG,CACNA2D4
14_Member	WikiPathways	WP4298	Acute viral myocarditis	-2.31162	-0.556	5/87	5594,6443,6444,6445,7100	MAPK1,SGCB,SGCD,SGCG,TLR5
14_Member	KEGG Pathway	hsa05416	Viral myocarditis	-2.16087	-0.471238	4/60	5879,6443,6444,6445	RAC1,SGCB,SGCD,SGCG
15_Summary	GO Biological Processes	GO:0002685	regulation of leukocyte migration	-4.63992	-1.57199	12/218	102,347,1803,1893,2660,3676,5594,5879,7499,27342,65125,158747,1901,3603,64094,5322,5603,22861,51704,91445,135250,353091,150,2254,4313,4653,11170,55737,57007,79872,9638	ADAM10,APOD,DPP4,ECM1,MSTN,ITGA4,MAPK1,RAC1,XG,RABGEF1,WNK1,MOSPD2,S1PR1,IL16,SMOC2,PLA2G5,MAPK13,NLRP1,GPRC5B,RNF185,RAET1E,RAET1G,ADRA2A,FGF9,MMP2,MYOC,FAM107A,VPS35,ACKR3,CBLL1,FEZ1
15_Member	GO Biological Processes	GO:0002685	regulation of leukocyte migration	-4.63992	-1.57199	12/218	102,347,1803,1893,2660,3676,5594,5879,7499,27342,65125,158747	ADAM10,APOD,DPP4,ECM1,MSTN,ITGA4,MAPK1,RAC1,XG,RABGEF1,WNK1,MOSPD2
15_Member	GO Biological Processes	GO:0050921	positive regulation of chemotaxis	-4.13166	-1.37973	9/140	102,1901,2660,3603,5594,5879,64094,65125,158747	ADAM10,S1PR1,MSTN,IL16,MAPK1,RAC1,SMOC2,WNK1,MOSPD2
15_Member	GO Biological Processes	GO:0071675	regulation of mononuclear cell migration	-3.94493	-1.3691	8/116	102,347,1893,2660,3676,5594,65125,158747	ADAM10,APOD,ECM1,MSTN,ITGA4,MAPK1,WNK1,MOSPD2
15_Member	GO Biological Processes	GO:0032103	positive regulation of response to external stimulus	-3.75995	-1.26643	16/442	102,1901,2660,3603,5322,5594,5603,5879,22861,51704,64094,65125,91445,135250,158747,353091	ADAM10,S1PR1,MSTN,IL16,PLA2G5,MAPK1,MAPK13,RAC1,NLRP1,GPRC5B,SMOC2,WNK1,RNF185,RAET1E,MOSPD2,RAET1G
15_Member	GO Biological Processes	GO:2000404	regulation of T cell migration	-3.65261	-1.24042	5/44	102,347,1893,3676,65125	ADAM10,APOD,ECM1,ITGA4,WNK1
15_Member	GO Biological Processes	GO:0040017	positive regulation of locomotion	-3.6161	-1.22845	19/599	102,150,1901,2254,2660,3603,3676,4313,4653,5594,5879,7499,11170,55737,57007,64094,65125,79872,158747	ADAM10,ADRA2A,S1PR1,FGF9,MSTN,IL16,ITGA4,MMP2,MYOC,MAPK1,RAC1,XG,FAM107A,VPS35,ACKR3,SMOC2,WNK1,CBLL1,MOSPD2
15_Member	GO Biological Processes	GO:0002687	positive regulation of leukocyte migration	-3.3652	-1.13397	8/141	102,2660,3676,5594,5879,7499,65125,158747	ADAM10,MSTN,ITGA4,MAPK1,RAC1,XG,WNK1,MOSPD2
15_Member	GO Biological Processes	GO:0071622	regulation of granulocyte chemotaxis	-3.34878	-1.13397	5/51	1803,2660,5594,5879,158747	DPP4,MSTN,MAPK1,RAC1,MOSPD2
15_Member	GO Biological Processes	GO:0050920	regulation of chemotaxis	-3.21828	-1.07662	10/225	102,1803,1901,2660,3603,5594,5879,64094,65125,158747	ADAM10,DPP4,S1PR1,MSTN,IL16,MAPK1,RAC1,SMOC2,WNK1,MOSPD2
15_Member	GO Biological Processes	GO:0051272	positive regulation of cellular component movement	-3.20643	-1.07662	18/596	102,150,1901,2254,2660,3676,4313,4653,5594,5879,7499,9638,11170,57007,64094,65125,79872,158747	ADAM10,ADRA2A,S1PR1,FGF9,MSTN,ITGA4,MMP2,MYOC,MAPK1,RAC1,XG,FEZ1,FAM107A,ACKR3,SMOC2,WNK1,CBLL1,MOSPD2
15_Member	GO Biological Processes	GO:0030335	positive regulation of cell migration	-3.08331	-1.01078	17/560	102,150,1901,2254,2660,3676,4313,4653,5594,5879,7499,11170,57007,64094,65125,79872,158747	ADAM10,ADRA2A,S1PR1,FGF9,MSTN,ITGA4,MMP2,MYOC,MAPK1,RAC1,XG,FAM107A,ACKR3,SMOC2,WNK1,CBLL1,MOSPD2
15_Member	GO Biological Processes	GO:0002688	regulation of leukocyte chemotaxis	-2.99681	-0.96819	7/124	102,1803,2660,5594,5879,65125,158747	ADAM10,DPP4,MSTN,MAPK1,RAC1,WNK1,MOSPD2
15_Member	GO Biological Processes	GO:2000401	regulation of lymphocyte migration	-2.92618	-0.931681	5/63	102,347,1893,3676,65125	ADAM10,APOD,ECM1,ITGA4,WNK1
15_Member	GO Biological Processes	GO:0002690	positive regulation of leukocyte chemotaxis	-2.91262	-0.923867	6/94	102,2660,5594,5879,65125,158747	ADAM10,MSTN,MAPK1,RAC1,WNK1,MOSPD2
15_Member	GO Biological Processes	GO:2000147	positive regulation of cell motility	-2.88672	-0.907387	17/584	102,150,1901,2254,2660,3676,4313,4653,5594,5879,7499,11170,57007,64094,65125,79872,158747	ADAM10,ADRA2A,S1PR1,FGF9,MSTN,ITGA4,MMP2,MYOC,MAPK1,RAC1,XG,FAM107A,ACKR3,SMOC2,WNK1,CBLL1,MOSPD2
15_Member	GO Biological Processes	GO:2000406	positive regulation of T cell migration	-2.16521	-0.47211	3/31	102,3676,65125	ADAM10,ITGA4,WNK1
15_Member	GO Biological Processes	GO:0071677	positive regulation of mononuclear cell migration	-2.01663	-0.39585	4/66	102,3676,65125,158747	ADAM10,ITGA4,WNK1,MOSPD2
16_Summary	GO Biological Processes	GO:0030162	regulation of proteolysis	-4.54549	-1.55689	24/743	150,334,710,825,843,1508,1522,1893,1992,5601,6423,8434,8554,9104,22861,25897,29761,54103,55294,83464,84168,91445,135228,255082,1901,5322,5906,9411,10681,23380,50807,202243	ADRA2A,APLP2,SERPING1,CAPN3,CASP10,CTSB,CTSZ,ECM1,SERPINB1,MAPK9,SFRP2,RECK,PIAS1,RGN,NLRP1,RNF19A,USP25,GSAP,FBXW7,APH1B,ANTXR1,RNF185,CD109,CASC2,S1PR1,PLA2G5,RAP1A,ARHGAP29,GNB5,SRGAP2,ASAP1,CCDC125
16_Member	GO Biological Processes	GO:0030162	regulation of proteolysis	-4.54549	-1.55689	24/743	150,334,710,825,843,1508,1522,1893,1992,5601,6423,8434,8554,9104,22861,25897,29761,54103,55294,83464,84168,91445,135228,255082	ADRA2A,APLP2,SERPING1,CAPN3,CASP10,CTSB,CTSZ,ECM1,SERPINB1,MAPK9,SFRP2,RECK,PIAS1,RGN,NLRP1,RNF19A,USP25,GSAP,FBXW7,APH1B,ANTXR1,RNF185,CD109,CASC2
16_Member	GO Biological Processes	GO:0045862	positive regulation of proteolysis	-3.56445	-1.2005	14/369	150,825,843,5601,6423,8554,9104,22861,25897,55294,83464,84168,91445,255082	ADRA2A,CAPN3,CASP10,MAPK9,SFRP2,PIAS1,RGN,NLRP1,RNF19A,FBXW7,APH1B,ANTXR1,RNF185,CASC2
16_Member	GO Biological Processes	GO:0052547	regulation of peptidase activity	-2.25922	-0.521065	13/456	334,710,843,1508,1893,1992,6423,8434,22861,83464,84168,135228,255082	APLP2,SERPING1,CASP10,CTSB,ECM1,SERPINB1,SFRP2,RECK,NLRP1,APH1B,ANTXR1,CD109,CASC2
16_Member	GO Biological Processes	GO:0051345	positive regulation of hydrolase activity	-2.16388	-0.47211	15/577	843,1901,5322,5906,6423,9104,9411,10681,22861,23380,50807,83464,84168,202243,255082	CASP10,S1PR1,PLA2G5,RAP1A,SFRP2,RGN,ARHGAP29,GNB5,NLRP1,SRGAP2,ASAP1,APH1B,ANTXR1,CCDC125,CASC2
17_Summary	GO Biological Processes	GO:0030029	actin filament-based process	-4.52172	-1.55524	21/602	150,822,825,1073,1901,4620,5879,5898,6444,8913,8936,9051,10006,10015,11170,22885,23380,58480,84168,84952,116154,1805,2280,2331,6423,10516,11075,23127,23621,57562	ADRA2A,CAPG,CAPN3,CFL2,S1PR1,MYH2,RAC1,RALA,SGCD,CACNA1G,WASF1,PSTPIP1,ABI1,PDCD6IP,FAM107A,ABLIM3,SRGAP2,RHOU,ANTXR1,CGNL1,PHACTR3,DPT,FKBP1A,FMOD,SFRP2,FBLN5,STMN2,COLGALT2,BACE1,CEP126
17_Member	GO Biological Processes	GO:0030029	actin filament-based process	-4.52172	-1.55524	21/602	150,822,825,1073,1901,4620,5879,5898,6444,8913,8936,9051,10006,10015,11170,22885,23380,58480,84168,84952,116154	ADRA2A,CAPG,CAPN3,CFL2,S1PR1,MYH2,RAC1,RALA,SGCD,CACNA1G,WASF1,PSTPIP1,ABI1,PDCD6IP,FAM107A,ABLIM3,SRGAP2,RHOU,ANTXR1,CGNL1,PHACTR3
17_Member	GO Biological Processes	GO:0097435	supramolecular fiber organization	-3.89461	-1.33325	18/522	822,825,1073,1805,2280,2331,5879,6423,8936,9051,10006,10516,11075,11170,23127,23621,57562,84952	CAPG,CAPN3,CFL2,DPT,FKBP1A,FMOD,RAC1,SFRP2,WASF1,PSTPIP1,ABI1,FBLN5,STMN2,FAM107A,COLGALT2,BACE1,CEP126,CGNL1
17_Member	GO Biological Processes	GO:0030036	actin cytoskeleton organization	-3.25766	-1.08706	17/540	150,822,825,1073,1901,5879,5898,8936,9051,10006,10015,11170,22885,58480,84168,84952,116154	ADRA2A,CAPG,CAPN3,CFL2,S1PR1,RAC1,RALA,WASF1,PSTPIP1,ABI1,PDCD6IP,FAM107A,ABLIM3,RHOU,ANTXR1,CGNL1,PHACTR3
18_Summary	Reactome Gene Sets	R-HSA-6798695	Neutrophil degranulation	-4.35459	-1.42288	18/480	102,968,1432,1508,1522,1992,2519,5594,5879,5906,8836,11010,22875,23114,51552,80301,158747,160364	ADAM10,CD68,MAPK14,CTSB,CTSZ,SERPINB1,FUCA2,MAPK1,RAC1,RAP1A,GGH,GLIPR1,ENPP4,NFASC,RAB14,PLEKHO2,MOSPD2,CLEC12A
18_Member	Reactome Gene Sets	R-HSA-6798695	Neutrophil degranulation	-4.35459	-1.42288	18/480	102,968,1432,1508,1522,1992,2519,5594,5879,5906,8836,11010,22875,23114,51552,80301,158747,160364	ADAM10,CD68,MAPK14,CTSB,CTSZ,SERPINB1,FUCA2,MAPK1,RAC1,RAP1A,GGH,GLIPR1,ENPP4,NFASC,RAB14,PLEKHO2,MOSPD2,CLEC12A
19_Summary	GO Biological Processes	GO:0044706	multi-multicellular organism process	-4.33736	-1.42204	11/198	150,1508,3952,4313,5066,5241,5618,5670,5673,8434,8605,2660,825,6935,94,490,710,1522,5028,6444,6445,8913,65125,478,1193,10659,27129	ADRA2A,CTSB,LEP,MMP2,PAM,PGR,PRLR,PSG2,PSG5,RECK,PLA2G4C,MSTN,CAPN3,ZEB1,ACVRL1,ATP2B1,SERPING1,CTSZ,P2RY1,SGCD,SGCG,CACNA1G,WNK1,ATP1A3,CLIC2,CELF2,HSPB7
19_Member	GO Biological Processes	GO:0044706	multi-multicellular organism process	-4.33736	-1.42204	11/198	150,1508,3952,4313,5066,5241,5618,5670,5673,8434,8605	ADRA2A,CTSB,LEP,MMP2,PAM,PGR,PRLR,PSG2,PSG5,RECK,PLA2G4C
19_Member	GO Biological Processes	GO:0007565	female pregnancy	-4.2012	-1.37973	10/170	150,1508,3952,4313,5066,5241,5618,5670,5673,8434	ADRA2A,CTSB,LEP,MMP2,PAM,PGR,PRLR,PSG2,PSG5,RECK
19_Member	GO Biological Processes	GO:0001542	ovulation from ovarian follicle	-3.65389	-1.24042	3/10	3952,4313,5241	LEP,MMP2,PGR
19_Member	GO Biological Processes	GO:0022602	ovulation cycle process	-3.56041	-1.2005	5/46	2660,3952,4313,5066,5241	MSTN,LEP,MMP2,PAM,PGR
19_Member	GO Biological Processes	GO:0014823	response to activity	-2.86497	-0.893446	5/65	825,2660,3952,4313,6935	CAPN3,MSTN,LEP,MMP2,ZEB1
19_Member	GO Biological Processes	GO:0042698	ovulation cycle	-2.80595	-0.855769	5/67	2660,3952,4313,5066,5241	MSTN,LEP,MMP2,PAM,PGR
19_Member	GO Biological Processes	GO:0030728	ovulation	-2.78326	-0.844619	3/19	3952,4313,5241	LEP,MMP2,PGR
19_Member	GO Biological Processes	GO:0008015	blood circulation	-2.29425	-0.54374	12/400	94,150,490,710,1522,3952,4313,5028,6444,6445,8913,65125	ACVRL1,ADRA2A,ATP2B1,SERPING1,CTSZ,LEP,MMP2,P2RY1,SGCD,SGCG,CACNA1G,WNK1
19_Member	GO Biological Processes	GO:1903522	regulation of blood circulation	-2.26926	-0.526805	9/256	150,478,490,1193,3952,4313,8913,10659,27129	ADRA2A,ATP1A3,ATP2B1,CLIC2,LEP,MMP2,CACNA1G,CELF2,HSPB7
19_Member	GO Biological Processes	GO:0019229	regulation of vasoconstriction	-2.0629	-0.418641	4/64	150,490,3952,4313	ADRA2A,ATP2B1,LEP,MMP2
20_Summary	GO Biological Processes	GO:0007389	pattern specification process	-4.26698	-1.41094	17/443	94,2018,3215,3223,3224,5087,6423,6935,9371,10006,23322,23424,23639,56603,79365,126668,221400,1432,1893,2254,3696,3952,4313,4653	ACVRL1,EMX2,HOXB5,HOXC6,HOXC8,PBX1,SFRP2,ZEB1,KIF3B,ABI1,RPGRIP1L,TDRD7,DNAAF11,CYP26B1,BHLHE41,TDRD10,TDRD6,MAPK14,ECM1,FGF9,ITGB8,LEP,MMP2,MYOC
20_Member	GO Biological Processes	GO:0007389	pattern specification process	-4.26698	-1.41094	17/443	94,2018,3215,3223,3224,5087,6423,6935,9371,10006,23322,23424,23639,56603,79365,126668,221400	ACVRL1,EMX2,HOXB5,HOXC6,HOXC8,PBX1,SFRP2,ZEB1,KIF3B,ABI1,RPGRIP1L,TDRD7,DNAAF11,CYP26B1,BHLHE41,TDRD10,TDRD6
20_Member	GO Biological Processes	GO:0009952	anterior/posterior pattern specification	-4.10711	-1.37973	11/210	2018,3215,3223,3224,5087,6423,10006,23424,79365,126668,221400	EMX2,HOXB5,HOXC6,HOXC8,PBX1,SFRP2,ABI1,TDRD7,BHLHE41,TDRD10,TDRD6
20_Member	GO Biological Processes	GO:0003002	regionalization	-4.03847	-1.37825	14/332	94,2018,3215,3223,3224,5087,6423,10006,23322,23424,56603,79365,126668,221400	ACVRL1,EMX2,HOXB5,HOXC6,HOXC8,PBX1,SFRP2,ABI1,RPGRIP1L,TDRD7,CYP26B1,BHLHE41,TDRD10,TDRD6
20_Member	GO Biological Processes	GO:0001501	skeletal system development	-2.77739	-0.843829	15/495	1432,1893,2254,3215,3223,3224,3696,3952,4313,4653,5087,6423,6935,10006,56603	MAPK14,ECM1,FGF9,HOXB5,HOXC6,HOXC8,ITGB8,LEP,MMP2,MYOC,PBX1,SFRP2,ZEB1,ABI1,CYP26B1
