# Supplementary material for: Transcriptional profiling of Hutchinson-Gilford Progeria syndrome fibroblasts reveals deficits in mesenchymal stem cell commitment to differentiation related to early events in endochondral ossification
Source: eLife journal article supplement (doi:10.7554/elife.81290), 2022-12-29
Supplement: table2-data1 [file metascape_result.xlsx]

## Sheet: Annotation
MyList	Gene ID	Type	Tax ID	Homologene Gene ID	Homologene Gene Tax ID	Gene Symbol	Description	Biological Process (GO)	Kinase Class (UniProt)	Protein Function (Protein Atlas)	Subcellular Location (Protein Atlas)	Drug (DrugBank)	Canonical Pathways	Hallmark Gene Sets	GO:0001934 positive regulation of protein	GO:0030155 regulation of cell adhesion	GO:0040017 positive regulation of locomot	GO:0071396 cellular response to lipid	R-HSA-382551 Transport of small molecules	M5885 NABA MATRISOME ASSOCIATED	WP4313 Ferroptosis	WP437 EGF/EGFR signaling pathway	GO:1901615 organic hydroxy compound metab	GO:0001944 vasculature development	GO:0070848 response to growth factor	GO:0050801 ion homeostasis	hsa04010 MAPK signaling pathway	GO:0007162 negative regulation of cell ad	GO:0048608 reproductive structure develop	hsa04015 Rap1 signaling pathway	R-HSA-449147 Signaling by Interleukins	GO:0006935 chemotaxis	GO:0009611 response to wounding	GO:0002685 regulation of leukocyte migrat
DOK6	220164	symbol	H. sapiens	220164	H. sapiens	DOK6	docking protein 6	GO:0007169 transmembrane receptor protein tyrosine kinase signaling pathway;GO:0043410 positive regulation of MAPK cascade;GO:0007167 enzyme linked receptor protein signaling pathway		Predicted intracellular proteins	Cytosol;Focal adhesion sites (Approved)		(M82)PID RET PATHWAY		1.0	0.0	0.0	0.0	0.0	0.0	0.0	1.0	0.0	0.0	0.0	0.0	1.0	0.0	0.0	0.0	0.0	1.0	0.0	0.0
CASP10	843	symbol	H. sapiens	843	H. sapiens	CASP10	caspase 10	GO:0097194 execution phase of apoptosis;GO:0006919 activation of cysteine-type endopeptidase activity involved in apoptotic process;GO:0043280 positive regulation of cysteine-type endopeptidase activity involved in apoptotic process		Human disease related genes:Immune system diseases:Primary immunodeficiency; Cancer-related genes:Candidate cancer biomarkers; ENZYME proteins:Hydrolases; Peptidases:Cysteine-type peptidases; Disease related genes; Potential drug targets; Enzymes; Predicted intracellular proteins	Golgi apparatus (Approved); Additional: Vesicles		(M7997)SA CASPASE CASCADE; (M79)PID TRAIL PATHWAY; (M94)PID FAS PATHWAY	(M5921)HALLMARK COMPLEMENT	0.0	0.0	0.0	0.0	0.0	1.0	0.0	1.0	0.0	0.0	0.0	0.0	0.0	0.0	0.0	0.0	0.0	0.0	0.0	0.0
FGF13	2258	symbol	H. sapiens	2258	H. sapiens	FGF13	fibroblast growth factor 13	GO:0045196 establishment or maintenance of neuroblast polarity;GO:0045200 establishment of neuroblast polarity;GO:0055059 asymmetric neuroblast division		Predicted intracellular proteins	Cytosol (Supported)		(M5883)NABA SECRETED FACTORS; (M5885)NABA MATRISOME ASSOCIATED; (M5889)NABA MATRISOME	(M5939)HALLMARK P53 PATHWAY	1.0	0.0	0.0	0.0	0.0	1.0	0.0	1.0	0.0	0.0	0.0	1.0	1.0	0.0	0.0	0.0	0.0	0.0	0.0	0.0
IL13RA2	3598	symbol	H. sapiens	3598	H. sapiens	IL13RA2	interleukin 13 receptor subunit alpha 2	GO:0043305 negative regulation of mast cell degranulation;GO:0033007 negative regulation of mast cell activation involved in immune response;GO:0002638 negative regulation of immunoglobulin production		CD markers; Cancer-related genes:Candidate cancer biomarkers	Cell Junctions;Plasma membrane (Approved); Additional: Nucleoplasm;Vesicles	AER001	(M28)PID IL4 2PATHWAY	(M5951)HALLMARK SPERMATOGENESIS	0.0	1.0	0.0	0.0	0.0	0.0	0.0	0.0	0.0	0.0	0.0	0.0	0.0	1.0	0.0	0.0	1.0	0.0	0.0	0.0
KCNS3	3790	symbol	H. sapiens	3790	H. sapiens	KCNS3	potassium voltage-gated channel modifier subfamily S member 3	GO:0071805 potassium ion transmembrane transport;GO:0006813 potassium ion transport;GO:0051260 protein homooligomerization		Predicted intracellular proteins; Transporters:Transporter channels and pores; Voltage-gated ion channels:Voltage-Gated Potassium Channels	Cytosol (Supported); Additional: Golgi apparatus;Plasma membrane				0.0	0.0	0.0	0.0	0.0	0.0	0.0	0.0	0.0	0.0	0.0	0.0	0.0	0.0	0.0	0.0	0.0	0.0	0.0	0.0
NFASC	23114	symbol	H. sapiens	23114	H. sapiens	NFASC	neurofascin	GO:0019226 transmission of nerve impulse;GO:0007422 peripheral nervous system development;GO:0042552 myelination		Predicted intracellular proteins; Human disease related genes:Other diseases:Mental and behavioural disorders; Disease related genes				(M5915)HALLMARK APICAL JUNCTION	0.0	0.0	0.0	0.0	0.0	0.0	0.0	0.0	0.0	0.0	0.0	0.0	0.0	0.0	0.0	0.0	0.0	1.0	0.0	0.0
LINC00856	100132987	symbol	H. sapiens	100132987	H. sapiens	LINC00856	long intergenic non-protein coding RNA 856								0.0	0.0	0.0	0.0	0.0	0.0	0.0	0.0	0.0	0.0	0.0	0.0	0.0	0.0	0.0	0.0	0.0	0.0	0.0	0.0
CPNE8	144402	symbol	H. sapiens	144402	H. sapiens	CPNE8	copine 8	GO:0071277 cellular response to calcium ion;GO:0051592 response to calcium ion;GO:0071248 cellular response to metal ion		Predicted intracellular proteins					0.0	0.0	0.0	0.0	0.0	0.0	0.0	0.0	0.0	0.0	0.0	0.0	0.0	0.0	0.0	0.0	0.0	0.0	0.0	0.0
CLGN	1047	symbol	H. sapiens	1047	H. sapiens	CLGN	calmegin	GO:0007339 binding of sperm to zona pellucida;GO:0035036 sperm-egg recognition;GO:0009988 cell-cell recognition		Predicted intracellular proteins	Endoplasmic reticulum (Supported)			(M5951)HALLMARK SPERMATOGENESIS	0.0	0.0	0.0	0.0	0.0	0.0	0.0	0.0	0.0	0.0	0.0	0.0	0.0	0.0	0.0	0.0	0.0	0.0	0.0	0.0
ADD2	119	symbol	H. sapiens	119	H. sapiens	ADD2	adducin 2	GO:0051016 barbed-end actin filament capping;GO:0050901 leukocyte tethering or rolling;GO:0061756 leukocyte adhesion to vascular endothelial cell		Predicted intracellular proteins	Cytosol;Nucleoplasm (Approved); Additional: Plasma membrane			(M5945)HALLMARK HEME METABOLISM	0.0	0.0	0.0	0.0	1.0	0.0	0.0	0.0	0.0	0.0	0.0	0.0	0.0	0.0	0.0	0.0	0.0	0.0	0.0	0.0
AKR1C2	1646	symbol	H. sapiens	1646	H. sapiens	AKR1C2	aldo-keto reductase family 1 member C2	GO:0009753 response to jasmonic acid;GO:0071395 cellular response to jasmonic acid stimulus;GO:0071798 response to prostaglandin D		FDA approved drug targets:Small molecule drugs; Human disease related genes:Reproductive system diseases:Reproductive system diseases; ENZYME proteins:Oxidoreductases; Disease related genes; Enzymes; Predicted intracellular proteins	Cytosol;Nucleoplasm (Approved); Additional: Endoplasmic reticulum;Nucleoli fibrillar center	NADH; Ursodeoxycholic acid; Nicotinamide adenine dinucleotide phosphate; Chenodeoxycholic acid; Epitestosterone		(M5934)HALLMARK XENOBIOTIC METABOLISM	0.0	0.0	0.0	1.0	0.0	0.0	1.0	0.0	1.0	0.0	0.0	0.0	0.0	0.0	0.0	0.0	0.0	0.0	0.0	0.0
KBTBD11	9920	symbol	H. sapiens	9920	H. sapiens	KBTBD11	kelch repeat and BTB domain containing 11			Predicted intracellular proteins	Intermediate filaments (Approved)				0.0	0.0	0.0	0.0	0.0	0.0	0.0	0.0	0.0	0.0	0.0	0.0	0.0	0.0	0.0	0.0	0.0	0.0	0.0	0.0
CACNA1G	8913	symbol	H. sapiens	8913	H. sapiens	CACNA1G	calcium voltage-gated channel subunit alpha1 G	GO:0010045 response to nickel cation;GO:0086046 membrane depolarization during SA node cell action potential;GO:0086045 membrane depolarization during AV node cell action potential		Voltage-gated ion channels:Voltage-Gated Calcium Channels; FDA approved drug targets:Small molecule drugs; Human disease related genes:Nervous system diseases:Neurodegenerative diseases; Disease related genes		Trimethadione; Cinnarizine; Ethosuximide; Verapamil; Zonisamide; Nifedipine; Mibefradil; Flunarizine; Methsuximide; Cannabidiol; Trimebutine; Benidipine; Manidipine; Bioallethrin; Medical Cannabis; Nabiximols	(M223)PID BETA CATENIN NUC PATHWAY		0.0	0.0	0.0	0.0	0.0	0.0	0.0	0.0	0.0	1.0	0.0	1.0	1.0	0.0	0.0	0.0	0.0	1.0	0.0	0.0
NINJ2	4815	symbol	H. sapiens	4815	H. sapiens	NINJ2	ninjurin 2	GO:0007158 neuron cell-cell adhesion;GO:0042246 tissue regeneration;GO:0031099 regeneration			Endoplasmic reticulum (Approved); Additional: Centriolar satellite;Cytosol;Nucleoplasm;Plasma membrane				0.0	0.0	0.0	0.0	0.0	0.0	0.0	0.0	0.0	0.0	0.0	0.0	0.0	0.0	0.0	0.0	0.0	0.0	0.0	0.0
FEZ1	9638	symbol	H. sapiens	9638	H. sapiens	FEZ1	fasciculation and elongation protein zeta 1	GO:0061880 regulation of anterograde axonal transport of mitochondrion;GO:0061881 positive regulation of anterograde axonal transport of mitochondrion;GO:1902513 regulation of organelle transport along microtubule		Predicted intracellular proteins	Cytosol;Microtubules (Approved)			(M5902)HALLMARK APOPTOSIS	0.0	0.0	1.0	0.0	0.0	0.0	0.0	0.0	0.0	0.0	1.0	0.0	0.0	0.0	0.0	0.0	0.0	1.0	0.0	0.0
AKR1C1	1645	symbol	H. sapiens	1645	H. sapiens	AKR1C1	aldo-keto reductase family 1 member C1	GO:0009753 response to jasmonic acid;GO:0071395 cellular response to jasmonic acid stimulus;GO:0044597 daunorubicin metabolic process		Enzymes; Predicted intracellular proteins; ENZYME proteins:Oxidoreductases	Cytosol;Endoplasmic reticulum (Enhanced)	NADH; Salicylic acid; Acetylsalicylic acid; Nicotinamide adenine dinucleotide phosphate; Naringenin; 2-HYDROXY-3,5-DIIODOBENZOIC ACID; Epitestosterone; Hexestrol			0.0	0.0	0.0	1.0	0.0	0.0	1.0	0.0	1.0	0.0	0.0	0.0	0.0	0.0	0.0	0.0	0.0	0.0	0.0	0.0
C10orf11	83938	gene_synonym	H. sapiens	83938	H. sapiens	LRMDA	leucine rich melanocyte differentiation associated	GO:0030318 melanocyte differentiation;GO:0050931 pigment cell differentiation;GO:0048066 developmental pigmentation		Human disease related genes:Congenital disorders of metabolism:Congenital disorders of amino acid metabolism; Predicted intracellular proteins; Disease related genes	Nucleoplasm (Supported); Additional: Cytosol				0.0	0.0	0.0	0.0	0.0	0.0	0.0	0.0	0.0	0.0	0.0	0.0	0.0	0.0	0.0	0.0	0.0	0.0	0.0	0.0
ITIH5	80760	symbol	H. sapiens	80760	H. sapiens	ITIH5	inter-alpha-trypsin inhibitor heavy chain 5	GO:0030212 hyaluronan metabolic process;GO:1903510 mucopolysaccharide metabolic process;GO:0030203 glycosaminoglycan metabolic process		Predicted secreted proteins; Predicted intracellular proteins	Golgi apparatus (Approved); Additional: Vesicles		(M3468)NABA ECM REGULATORS; (M5885)NABA MATRISOME ASSOCIATED; (M5889)NABA MATRISOME	(M5947)HALLMARK IL2 STAT5 SIGNALING; (M5905)HALLMARK ADIPOGENESIS	0.0	0.0	0.0	0.0	0.0	1.0	0.0	0.0	0.0	0.0	0.0	0.0	0.0	0.0	0.0	0.0	0.0	0.0	0.0	0.0
STEAP2	261729	symbol	H. sapiens	261729	H. sapiens	STEAP2	STEAP2 metalloreductase	GO:0015679 plasma membrane copper ion transport;GO:0098705 copper ion import across plasma membrane;GO:0098711 iron ion import across plasma membrane		Transporters:Transport Electron Carriers; Predicted intracellular proteins	Vesicles (Supported)				0.0	0.0	0.0	1.0	1.0	0.0	1.0	0.0	0.0	0.0	0.0	1.0	0.0	0.0	0.0	0.0	0.0	0.0	0.0	0.0
HECW1	23072	symbol	H. sapiens	23072	H. sapiens	HECW1	HECT, C2 and WW domain containing E3 ubiquitin protein ligase 1	GO:2000650 negative regulation of sodium ion transmembrane transporter activity;GO:1902306 negative regulation of sodium ion transmembrane transport;GO:0010766 negative regulation of sodium ion transport		Enzymes; Predicted intracellular proteins; ENZYME proteins:Transferases	Cytosol (Supported)				0.0	0.0	0.0	0.0	0.0	0.0	0.0	0.0	0.0	0.0	0.0	1.0	0.0	0.0	0.0	0.0	0.0	0.0	0.0	0.0
SYBU	55638	symbol	H. sapiens	55638	H. sapiens	SYBU	syntabulin	GO:0060074 synapse maturation;GO:0019896 axonal transport of mitochondrion;GO:0034643 establishment of mitochondrion localization, microtubule-mediated		Predicted intracellular proteins	Vesicles (Supported)			(M5906)HALLMARK ESTROGEN RESPONSE EARLY	0.0	0.0	0.0	0.0	0.0	0.0	0.0	0.0	0.0	0.0	0.0	0.0	0.0	0.0	0.0	0.0	0.0	0.0	0.0	0.0
PRLR	5618	symbol	H. sapiens	5618	H. sapiens	PRLR	prolactin receptor	GO:0038161 prolactin signaling pathway;GO:0042976 activation of Janus kinase activity;GO:0038165 oncostatin-M-mediated signaling pathway		Human disease related genes:Endocrine and metabolic diseases:Hypothalamus and pituitary gland diseases; FDA approved drug targets:Biotech drugs; Predicted intracellular proteins; Disease related genes		Somatotropin	(M13)PID ERBB4 PATHWAY; (M50)PID PTP1B PATHWAY	(M5907)HALLMARK ESTROGEN RESPONSE LATE	1.0	1.0	0.0	1.0	0.0	0.0	0.0	1.0	1.0	0.0	0.0	0.0	1.0	0.0	1.0	1.0	1.0	0.0	1.0	0.0
SPON1	10418	symbol	H. sapiens	10418	H. sapiens	SPON1	spondin 1	GO:1902993 positive regulation of amyloid precursor protein catabolic process;GO:0010954 positive regulation of protein processing;GO:1903319 positive regulation of protein maturation		Predicted secreted proteins	Microtubule ends;Nucleoli (Approved); Additional: Actin filaments;Cytokinetic bridge;Nucleoplasm		(M3008)NABA ECM GLYCOPROTEINS; (M5884)NABA CORE MATRISOME; (M5889)NABA MATRISOME	(M5953)HALLMARK KRAS SIGNALING UP	0.0	0.0	0.0	0.0	0.0	0.0	0.0	0.0	0.0	0.0	0.0	0.0	0.0	0.0	0.0	0.0	0.0	0.0	0.0	0.0
DSTYK	25778	symbol	H. sapiens	25778	H. sapiens	DSTYK	dual serine/threonine and tyrosine protein kinase	GO:0045743 positive regulation of fibroblast growth factor receptor signaling pathway;GO:0040036 regulation of fibroblast growth factor receptor signaling pathway;GO:0044344 cellular response to fibroblast growth factor stimulus	Other	Human disease related genes:Nervous system diseases:Other nervous and sensory system diseases; Human disease related genes:Congenital malformations:Congenital malformations of the urinary system; Disease related genes; Potential drug targets; Enzymes; Kinases; Predicted intracellular proteins; ENZYME proteins:Transferases					1.0	0.0	0.0	0.0	0.0	0.0	0.0	0.0	0.0	0.0	1.0	0.0	0.0	0.0	0.0	0.0	0.0	0.0	0.0	0.0
ZEB1	6935	symbol	H. sapiens	6935	H. sapiens	ZEB1	zinc finger E-box binding homeobox 1	GO:0048752 semicircular canal morphogenesis;GO:0060872 semicircular canal development;GO:0045602 negative regulation of endothelial cell differentiation		Human disease related genes:Nervous system diseases:Eye disease; Predicted intracellular proteins; Disease related genes; Transcription factors:Helix-turn-helix domains	Nucleoplasm (Supported); Additional: Nucleoli		(M71)PID ILK PATHWAY	(M5921)HALLMARK COMPLEMENT	0.0	1.0	0.0	0.0	0.0	0.0	0.0	1.0	0.0	1.0	1.0	0.0	0.0	0.0	0.0	1.0	1.0	0.0	0.0	0.0
ENPP4	22875	symbol	H. sapiens	22875	H. sapiens	ENPP4	ectonucleotide pyrophosphatase/phosphodiesterase 4	GO:0046130 purine ribonucleoside catabolic process;GO:0006152 purine nucleoside catabolic process;GO:0042454 ribonucleoside catabolic process		Enzymes; ENZYME proteins:Hydrolases					0.0	0.0	0.0	0.0	0.0	0.0	0.0	0.0	0.0	0.0	0.0	0.0	0.0	0.0	0.0	0.0	0.0	0.0	1.0	0.0
SHE	126669	symbol	H. sapiens	126669	H. sapiens	SHE	Src homology 2 domain containing E			Predicted secreted proteins; Predicted intracellular proteins	Nucleoplasm (Approved); Additional: Cytosol			(M5951)HALLMARK SPERMATOGENESIS; (M5947)HALLMARK IL2 STAT5 SIGNALING	0.0	0.0	0.0	0.0	0.0	0.0	0.0	0.0	0.0	0.0	0.0	0.0	0.0	0.0	0.0	0.0	0.0	0.0	0.0	0.0
NTN1	9423	symbol	H. sapiens	9423	H. sapiens	NTN1	netrin 1	GO:0061643 chemorepulsion of axon;GO:0032488 Cdc42 protein signal transduction;GO:0033564 anterior/posterior axon guidance		Human disease related genes:Nervous system diseases:Other nervous and sensory system diseases; Cancer-related genes:Candidate cancer biomarkers; Predicted secreted proteins; Disease related genes; Predicted intracellular proteins	Cytosol (Approved); Additional: Actin filaments;Nucleoplasm		(M108)PID NETRIN PATHWAY; (M5887)NABA BASEMENT MEMBRANES; (M3008)NABA ECM GLYCOPROTEINS		0.0	0.0	1.0	0.0	0.0	0.0	0.0	1.0	0.0	1.0	0.0	0.0	0.0	0.0	0.0	1.0	0.0	1.0	0.0	0.0
PHACTR1	221692	symbol	H. sapiens	221692	H. sapiens	PHACTR1	phosphatase and actin regulator 1	GO:0140059 dendrite arborization;GO:0140058 neuron projection arborization;GO:0030038 contractile actin filament bundle assembly		Human disease related genes:Nervous system diseases:Epilepsy; Predicted intracellular proteins; Disease related genes	Plasma membrane (Uncertain)				0.0	0.0	0.0	0.0	0.0	0.0	0.0	0.0	0.0	0.0	0.0	0.0	0.0	0.0	0.0	0.0	0.0	1.0	0.0	0.0
AKR1C3	8644	symbol	H. sapiens	8644	H. sapiens	AKR1C3	aldo-keto reductase family 1 member C3	GO:0006714 sesquiterpenoid metabolic process;GO:0016107 sesquiterpenoid catabolic process;GO:0016487 farnesol metabolic process		Enzymes; Predicted intracellular proteins; ENZYME proteins:Oxidoreductases	Cytosol;Nucleoplasm (Approved); Additional: Endoplasmic reticulum;Nucleoli fibrillar center	NADH; Indomethacin; Androstenedione; Rutin; Prostaglandin D2; Flufenamic acid; Nicotinamide adenine dinucleotide phosphate; 3-carboxamido-1,3,5(10)-estratrien-17(R)-spiro-2'(5',5'-dimethyl-6'oxo)tetrahydropyran		(M5934)HALLMARK XENOBIOTIC METABOLISM	0.0	0.0	0.0	1.0	0.0	0.0	1.0	0.0	1.0	0.0	0.0	0.0	0.0	0.0	1.0	0.0	0.0	0.0	0.0	0.0
PAMR1	25891	symbol	H. sapiens	25891	H. sapiens	PAMR1	peptidase domain containing associated with muscle regeneration 1			Enzymes; Predicted secreted proteins; Predicted intracellular proteins; Peptidases:Serine-type peptidases			(M3468)NABA ECM REGULATORS; (M5885)NABA MATRISOME ASSOCIATED; (M5889)NABA MATRISOME		0.0	0.0	0.0	0.0	0.0	1.0	0.0	0.0	0.0	0.0	0.0	0.0	0.0	0.0	0.0	0.0	0.0	0.0	0.0	0.0
ASPA	443	symbol	H. sapiens	443	H. sapiens	ASPA	aspartoacylase	GO:0006533 aspartate catabolic process;GO:0006531 aspartate metabolic process;GO:0009068 aspartate family amino acid catabolic process		ENZYME proteins:Hydrolases; Predicted intracellular proteins; Human disease related genes:Congenital disorders of metabolism:Congenital disorders of amino acid metabolism; Disease related genes; Potential drug targets; Enzymes; Human disease related genes:Nervous system diseases:Neurodegenerative diseases	Cytosol (Supported)	Aspartic acid; Zinc; Zinc acetate; Zinc chloride; Zinc sulfate, unspecified form			0.0	0.0	0.0	0.0	0.0	0.0	0.0	0.0	0.0	0.0	0.0	0.0	0.0	0.0	0.0	0.0	0.0	1.0	0.0	0.0
WISP2	8839	gene_synonym	H. sapiens	8839	H. sapiens	CCN5	cellular communication network factor 5	GO:0007155 cell adhesion;GO:0022610 biological adhesion;GO:0007267 cell-cell signaling		Predicted secreted proteins			(M3008)NABA ECM GLYCOPROTEINS; (M5884)NABA CORE MATRISOME; (M5889)NABA MATRISOME	(M5891)HALLMARK HYPOXIA; (M5906)HALLMARK ESTROGEN RESPONSE EARLY; (M5907)HALLMARK ESTROGEN RESPONSE LATE	0.0	0.0	0.0	0.0	0.0	0.0	0.0	0.0	0.0	0.0	0.0	0.0	0.0	0.0	0.0	0.0	0.0	0.0	0.0	0.0
KCNQ3	3786	symbol	H. sapiens	3786	H. sapiens	KCNQ3	potassium voltage-gated channel subfamily Q member 3	GO:0060081 membrane hyperpolarization;GO:0071805 potassium ion transmembrane transport;GO:0006813 potassium ion transport		Human disease related genes:Nervous system diseases:Epilepsy; Voltage-gated ion channels:Voltage-Gated Potassium Channels; Disease related genes; Potential drug targets; Transporters:Transporter channels and pores		Amitriptyline; Meclofenamic acid; Gabapentin; Ezogabine; ICA-105665			0.0	0.0	0.0	0.0	0.0	0.0	0.0	0.0	0.0	0.0	0.0	0.0	0.0	0.0	0.0	0.0	0.0	1.0	0.0	0.0
CTSS	1520	symbol	H. sapiens	1520	H. sapiens	CTSS	cathepsin S	GO:0034769 basement membrane disassembly;GO:0097067 cellular response to thyroid hormone stimulus;GO:0071711 basement membrane organization		Enzymes; ENZYME proteins:Hydrolases; Predicted intracellular proteins; Peptidases:Cysteine-type peptidases	Vesicles (Approved)	Morpholine-4-Carboxylic Acid [1s-(2-Benzyloxy-1r-Cyano-Ethylcarbamoyl)-3-Methyl-Butyl]Amide; Morpholine-4-Carboxylic Acid (1-(3-Benzenesulfonyl-1-Phenethylallylcarbamoyl)-3-Methylbutyl)-Amide; Morpholine-4-Carboxylic Acid [1-(2-Benzylsulfanyl-1-Formyl-Ethylcarbamoyl)-2-Phenyl-Ethyl]-Amide; N-[1-(AMINOMETHYL)CYCLOPROPYL]-3-(MORPHOLIN-4-YLSULFONYL)-N~2~-[(1S)-2,2,2-TRIFLUORO-1-(4-FLUOROPHENYL)ETHYL…	(M3468)NABA ECM REGULATORS; (M5885)NABA MATRISOME ASSOCIATED; (M5889)NABA MATRISOME	(M5921)HALLMARK COMPLEMENT; (M5950)HALLMARK ALLOGRAFT REJECTION; (M5953)HALLMARK KRAS SIGNALING UP	0.0	0.0	0.0	1.0	0.0	1.0	0.0	1.0	0.0	0.0	0.0	1.0	0.0	0.0	0.0	0.0	0.0	0.0	0.0	0.0
STEAP1	26872	symbol	H. sapiens	26872	H. sapiens	STEAP1	STEAP family member 1	GO:0055072 iron ion homeostasis;GO:0055076 transition metal ion homeostasis;GO:0055065 metal ion homeostasis		Transporters:Transport Electron Carriers; Cancer-related genes:Candidate cancer biomarkers					0.0	0.0	0.0	0.0	0.0	0.0	1.0	0.0	0.0	0.0	0.0	1.0	0.0	0.0	0.0	0.0	0.0	0.0	0.0	0.0
ACSL5	51703	symbol	H. sapiens	51703	H. sapiens	ACSL5	acyl-CoA synthetase long chain family member 5	GO:0010747 positive regulation of long-chain fatty acid import across plasma membrane;GO:0140214 positive regulation of long-chain fatty acid import into cell;GO:0010746 regulation of long-chain fatty acid import across plasma membrane		Enzymes; ENZYME proteins:Ligase	Mitochondria (Supported); Additional: Nucleoplasm			(M5949)HALLMARK PEROXISOME; (M5948)HALLMARK BILE ACID METABOLISM; (M5935)HALLMARK FATTY ACID METABOLISM	0.0	0.0	0.0	0.0	0.0	0.0	1.0	0.0	1.0	0.0	0.0	0.0	0.0	0.0	0.0	0.0	0.0	0.0	0.0	0.0
C1orf109	54955	symbol	H. sapiens	54955	H. sapiens	C1orf109	chromosome 1 open reading frame 109			Predicted intracellular proteins	Cytosol (Supported); Additional: Nucleoli;Nucleoplasm				0.0	0.0	0.0	0.0	0.0	0.0	0.0	0.0	0.0	0.0	0.0	0.0	0.0	0.0	0.0	0.0	0.0	0.0	0.0	0.0
CARD6	84674	symbol	H. sapiens	84674	H. sapiens	CARD6	caspase recruitment domain family member 6	GO:0006915 apoptotic process;GO:0012501 programmed cell death;GO:0008219 cell death		Predicted intracellular proteins					0.0	0.0	0.0	0.0	0.0	0.0	0.0	0.0	0.0	0.0	0.0	0.0	0.0	0.0	0.0	0.0	0.0	0.0	0.0	0.0
ZNF536	9745	symbol	H. sapiens	9745	H. sapiens	ZNF536	zinc finger protein 536	GO:0048387 negative regulation of retinoic acid receptor signaling pathway;GO:0048385 regulation of retinoic acid receptor signaling pathway;GO:0045665 negative regulation of neuron differentiation		Predicted intracellular proteins; Transcription factors:Zinc-coordinating DNA-binding domains	Cell Junctions;Nucleoplasm (Approved)				0.0	0.0	0.0	0.0	0.0	0.0	0.0	0.0	0.0	0.0	0.0	0.0	0.0	0.0	0.0	0.0	0.0	0.0	0.0	0.0
ENPP5	59084	symbol	H. sapiens	59084	H. sapiens	ENPP5	ectonucleotide pyrophosphatase/phosphodiesterase family member 5	GO:0007154 cell communication;GO:0009987 cellular process;GO:0008150 biological_process			Cytosol (Approved); Additional: Nucleoplasm				0.0	0.0	0.0	0.0	0.0	0.0	0.0	0.0	0.0	0.0	0.0	0.0	0.0	0.0	0.0	0.0	0.0	0.0	0.0	0.0
ABCB4	5244	symbol	H. sapiens	5244	H. sapiens	ABCB4	ATP binding cassette subfamily B member 4	GO:1901557 response to fenofibrate;GO:0061092 positive regulation of phospholipid translocation;GO:1903412 response to bile acid		Human disease related genes:Digestive system diseases:Liver diseases; ENZYME proteins; Disease related genes; Potential drug targets; Enzymes; Transporters:Primary Active Transporters; Predicted intracellular proteins	Actin filaments;Nucleoplasm;Plasma membrane (Approved); Additional: Focal adhesion sites			(M5949)HALLMARK PEROXISOME	0.0	0.0	0.0	1.0	1.0	0.0	0.0	0.0	1.0	0.0	0.0	0.0	0.0	0.0	0.0	0.0	0.0	0.0	0.0	0.0
PVRL3	25945	gene_synonym	H. sapiens	25945	H. sapiens	NECTIN3	nectin cell adhesion molecule 3	GO:0002089 lens morphogenesis in camera-type eye;GO:0007157 heterophilic cell-cell adhesion via plasma membrane cell adhesion molecules;GO:0061951 establishment of protein localization to plasma membrane		Predicted intracellular proteins; CD markers	Cytosol (Approved); Additional: Cell Junctions		(M72)PID NECTIN PATHWAY	(M5915)HALLMARK APICAL JUNCTION	0.0	0.0	0.0	0.0	0.0	0.0	0.0	1.0	0.0	0.0	0.0	0.0	0.0	0.0	0.0	0.0	0.0	0.0	0.0	0.0
MAP4K4	9448	symbol	H. sapiens	9448	H. sapiens	MAP4K4	mitogen-activated protein kinase kinase kinase kinase 4	GO:0032014 positive regulation of ARF protein signal transduction;GO:0120182 regulation of focal adhesion disassembly;GO:0120183 positive regulation of focal adhesion disassembly	STE Ser/Thr protein kinase family	Enzymes; Kinases:STE Ser/Thr protein kinases; Predicted intracellular proteins; ENZYME proteins:Transferases		Fostamatinib	(M62)PID EPHB FWD PATHWAY; (M144)PID CERAMIDE PATHWAY; (M128)PID TNF PATHWAY		1.0	1.0	1.0	0.0	0.0	0.0	0.0	1.0	0.0	0.0	0.0	0.0	1.0	1.0	0.0	0.0	0.0	1.0	0.0	0.0
ATP8B4	79895	symbol	H. sapiens	79895	H. sapiens	ATP8B4	ATPase phospholipid transporting 8B4 (putative)	GO:0045332 phospholipid translocation;GO:0034204 lipid translocation;GO:0097035 regulation of membrane lipid distribution		Enzymes; ENZYME proteins; Predicted intracellular proteins	Nucleoplasm;Vesicles (Uncertain); Additional: Cytosol				0.0	0.0	0.0	0.0	1.0	0.0	0.0	0.0	0.0	0.0	0.0	0.0	0.0	0.0	0.0	0.0	0.0	0.0	0.0	0.0
EMX2OS	196047	symbol	H. sapiens	196047	H. sapiens	EMX2OS	EMX2 opposite strand/antisense RNA								0.0	0.0	0.0	0.0	0.0	0.0	0.0	0.0	0.0	0.0	0.0	0.0	0.0	0.0	0.0	0.0	0.0	0.0	0.0	0.0
MAN1A1	4121	symbol	H. sapiens	4121	H. sapiens	MAN1A1	mannosidase alpha class 1A member 1	GO:1904381 Golgi apparatus mannose trimming;GO:0035977 protein deglycosylation involved in glycoprotein catabolic process;GO:0097466 ubiquitin-dependent glycoprotein ERAD pathway		Enzymes; ENZYME proteins:Hydrolases	Golgi apparatus (Supported)			(M5934)HALLMARK XENOBIOTIC METABOLISM	0.0	0.0	0.0	0.0	0.0	0.0	0.0	0.0	0.0	0.0	0.0	0.0	0.0	0.0	0.0	0.0	0.0	0.0	0.0	0.0
CTSK	1513	symbol	H. sapiens	1513	H. sapiens	CTSK	cathepsin K	GO:0001957 intramembranous ossification;GO:0036072 direct ossification;GO:0006590 thyroid hormone generation		Human disease related genes:Congenital disorders of metabolism:Lysosomal storage diseases; ENZYME proteins:Hydrolases; Peptidases:Cysteine-type peptidases; Human disease related genes:Congenital malformations:Congenital malformations of skin; Disease related genes; Potential drug targets; Enzymes; Predicted intracellular proteins	Vesicles (Supported)	[1-(4-Fluorobenzyl)Cyclobutyl]Methyl (1s)-1-[Oxo(1h-Pyrazol-5-Ylamino)Acetyl]Pentylcarbamate; Cyanamide; 3-amino-5-phenylpentane; N2-[(Benzyloxy)carbonyl]-N-[(3R)-1-{N-[(benzyloxy)carbonyl]-L-leucyl}-4-oxo-3-pyrrolidinyl]-L-leucinamide; N2-[(benzyloxy)carbonyl]-n1-[(3S)-1-cyanopyrrolidin-3-yl]-l-leucinamide; N-[(2S)-4-Methyl-1-oxo-1-{[(4S)-3-oxo-1-(2-pyridinylsulfonyl)-4-azepanyl]amino}-2-pentany…	(M3468)NABA ECM REGULATORS; (M5885)NABA MATRISOME ASSOCIATED; (M5889)NABA MATRISOME	(M5946)HALLMARK COAGULATION	0.0	0.0	0.0	0.0	0.0	1.0	0.0	1.0	1.0	0.0	0.0	0.0	0.0	0.0	0.0	0.0	0.0	0.0	0.0	0.0
PQLC2L	152078	gene_synonym	H. sapiens	152078	H. sapiens	SLC66A1L	solute carrier family 66 member 1 like	GO:1903826 L-arginine transmembrane transport;GO:1902022 L-lysine transport;GO:1903401 L-lysine transmembrane transport							0.0	0.0	0.0	0.0	0.0	0.0	0.0	0.0	0.0	0.0	0.0	0.0	0.0	0.0	0.0	0.0	0.0	0.0	0.0	0.0
RNF144A	9781	symbol	H. sapiens	9781	H. sapiens	RNF144A	ring finger protein 144A	GO:0032436 positive regulation of proteasomal ubiquitin-dependent protein catabolic process;GO:2000060 positive regulation of ubiquitin-dependent protein catabolic process;GO:1901800 positive regulation of proteasomal protein catabolic process		Enzymes; Predicted intracellular proteins; ENZYME proteins:Transferases	Vesicles (Supported)				0.0	0.0	0.0	0.0	0.0	0.0	0.0	0.0	0.0	0.0	0.0	0.0	0.0	0.0	0.0	0.0	0.0	0.0	0.0	0.0
SLC35F2	54733	symbol	H. sapiens	54733	H. sapiens	SLC35F2	solute carrier family 35 member F2	GO:0055085 transmembrane transport;GO:0006810 transport;GO:0051234 establishment of localization		Transporters:Electrochemical Potential-driven transporters	Golgi apparatus (Approved)				0.0	0.0	0.0	0.0	0.0	0.0	0.0	0.0	0.0	0.0	0.0	0.0	0.0	0.0	0.0	0.0	0.0	0.0	0.0	0.0
PXMP4	11264	symbol	H. sapiens	11264	H. sapiens	PXMP4	peroxisomal membrane protein 4	GO:0008150 biological_process		Transporters:Transporter channels and pores; Predicted intracellular proteins	Peroxisomes (Approved); Additional: Nucleoli fibrillar center				0.0	0.0	0.0	0.0	0.0	0.0	0.0	0.0	0.0	0.0	0.0	0.0	0.0	0.0	0.0	0.0	0.0	0.0	0.0	0.0
ABHD5	51099	symbol	H. sapiens	51099	H. sapiens	ABHD5	abhydrolase domain containing 5, lysophosphatidic acid acyltransferase	GO:0010891 negative regulation of sequestering of triglyceride;GO:0010898 positive regulation of triglyceride catabolic process;GO:0051006 positive regulation of lipoprotein lipase activity		Peptidases:Serine-type peptidases; Human disease related genes:Congenital disorders of metabolism:Congenital disorders of lipid/glycolipid metabolism; Disease related genes; Potential drug targets; Enzymes; Predicted intracellular proteins; ENZYME proteins:Transferases	Cytosol;Vesicles (Supported); Additional: Nucleoplasm				0.0	0.0	0.0	0.0	0.0	0.0	0.0	0.0	1.0	0.0	0.0	0.0	0.0	0.0	0.0	0.0	0.0	0.0	0.0	0.0
CCDC93	54520	symbol	H. sapiens	54520	H. sapiens	CCDC93	coiled-coil domain containing 93	GO:0006893 Golgi to plasma membrane transport;GO:0032456 endocytic recycling;GO:0006892 post-Golgi vesicle-mediated transport		Transporters; Predicted intracellular proteins	Vesicles (Enhanced); Additional: Plasma membrane				0.0	0.0	0.0	0.0	0.0	0.0	0.0	0.0	0.0	0.0	0.0	0.0	0.0	0.0	0.0	0.0	0.0	0.0	0.0	0.0
SLC25A43	203427	symbol	H. sapiens	203427	H. sapiens	SLC25A43	solute carrier family 25 member 43	GO:0055085 transmembrane transport;GO:0006810 transport;GO:0051234 establishment of localization		Transporters:Electrochemical Potential-driven transporters	Cytosol (Approved)				0.0	0.0	0.0	0.0	0.0	0.0	0.0	0.0	0.0	0.0	0.0	0.0	0.0	0.0	0.0	0.0	0.0	0.0	0.0	0.0
FUT8	2530	symbol	H. sapiens	2530	H. sapiens	FUT8	fucosyltransferase 8	GO:0033578 protein glycosylation in Golgi;GO:0036071 N-glycan fucosylation;GO:0046368 GDP-L-fucose metabolic process		Human disease related genes:Congenital disorders of metabolism:Congenital disorders of carbohydrate metabolism; Disease related genes; Potential drug targets; Enzymes; Predicted intracellular proteins; ENZYME proteins:Transferases	Golgi apparatus (Approved); Additional: Cytosol;Nucleoplasm			(M5937)HALLMARK GLYCOLYSIS	0.0	0.0	0.0	0.0	0.0	0.0	0.0	0.0	0.0	0.0	1.0	0.0	1.0	0.0	0.0	0.0	0.0	0.0	0.0	0.0
KIAA1324L	222223	gene_synonym	H. sapiens	222223	H. sapiens	ELAPOR2	endosome-lysosome associated apoptosis and autophagy regulator family member 2	GO:0045684 positive regulation of epidermis development;GO:0030513 positive regulation of BMP signaling pathway;GO:0045682 regulation of epidermis development		Predicted intracellular proteins	Endoplasmic reticulum (Approved)				0.0	0.0	0.0	0.0	0.0	0.0	0.0	0.0	0.0	0.0	0.0	0.0	0.0	0.0	0.0	0.0	0.0	0.0	0.0	0.0
ANXA5	308	symbol	H. sapiens	308	H. sapiens	ANXA5	annexin A5	GO:0050819 negative regulation of coagulation;GO:0050818 regulation of coagulation;GO:0007596 blood coagulation		Transporters:Transporter channels and pores; FDA approved drug targets:Small molecule drugs; Predicted intracellular proteins; Disease related genes	Nuclear membrane (Approved)	Fluocinolone acetonide; L-Alpha-Glycerophosphorylserine; L-thioproline; K201 free base; sn-glycero-3-phosphoethanolamine; 1,4-Dideoxy-O2-Sulfo-Glucuronic Acid; N,O6-Disulfo-Glucosamine; 1,4-Dideoxy-5-Dehydro-O2-Sulfo-Glucuronic Acid; Copper	(M5880)NABA ECM AFFILIATED; (M5885)NABA MATRISOME ASSOCIATED; (M5889)NABA MATRISOME	(M5892)HALLMARK CHOLESTEROL HOMEOSTASIS; (M5921)HALLMARK COMPLEMENT	0.0	0.0	0.0	0.0	0.0	1.0	0.0	0.0	0.0	0.0	0.0	0.0	0.0	0.0	0.0	0.0	0.0	0.0	1.0	0.0
LOC101927204	101927204	Gene_ID	H. sapiens	101927204	H. sapiens	FAM111A-DT	FAM111A divergent transcript								0.0	0.0	0.0	0.0	0.0	0.0	0.0	0.0	0.0	0.0	0.0	0.0	0.0	0.0	0.0	0.0	0.0	0.0	0.0	0.0
PROS1	5627	symbol	H. sapiens	5627	H. sapiens	PROS1	protein S	GO:0042730 fibrinolysis;GO:0030195 negative regulation of blood coagulation;GO:1900047 negative regulation of hemostasis		Human disease related genes:Cardiovascular diseases:Vascular diseases; FDA approved drug targets:Small molecule drugs; Candidate cardiovascular disease genes; Human disease related genes:Cardiovascular diseases:Hematologic diseases; Predicted secreted proteins; Disease related genes; Predicted intracellular proteins		Drotrecogin alfa; Menadione; Sodium tetradecyl sulfate; Kappadione		(M5946)HALLMARK COAGULATION; (M5934)HALLMARK XENOBIOTIC METABOLISM	0.0	0.0	0.0	0.0	0.0	0.0	0.0	0.0	0.0	0.0	0.0	0.0	0.0	0.0	0.0	0.0	0.0	0.0	1.0	0.0
IRX5	10265	symbol	H. sapiens	10265	H. sapiens	IRX5	iroquois homeobox 5	GO:0048701 embryonic cranial skeleton morphogenesis;GO:1904888 cranial skeletal system development;GO:0048704 embryonic skeletal system morphogenesis		Human disease related genes:Congenital malformations:Other congenital malformations; Predicted intracellular proteins; Disease related genes; Transcription factors:Helix-turn-helix domains	Nuclear speckles (Approved); Additional: Cytosol;Microtubules				0.0	0.0	0.0	0.0	0.0	0.0	0.0	0.0	0.0	0.0	0.0	0.0	0.0	0.0	1.0	0.0	0.0	0.0	0.0	0.0
ADTRP	84830	symbol	H. sapiens	84830	H. sapiens	ADTRP	androgen dependent TFPI regulating protein	GO:0003332 negative regulation of extracellular matrix constituent secretion;GO:0042758 long-chain fatty acid catabolic process;GO:0003330 regulation of extracellular matrix constituent secretion			Nucleoli (Uncertain)				1.0	1.0	0.0	1.0	0.0	0.0	0.0	0.0	0.0	1.0	0.0	0.0	0.0	1.0	0.0	0.0	0.0	0.0	1.0	1.0
APOD	347	symbol	H. sapiens	347	H. sapiens	APOD	apolipoprotein D	GO:0034443 negative regulation of lipoprotein oxidation;GO:0060588 negative regulation of lipoprotein lipid oxidation;GO:0034442 regulation of lipoprotein oxidation		Predicted secreted proteins; Candidate cardiovascular disease genes; Cancer-related genes:Candidate cancer biomarkers	Plasma membrane (Approved)	Vitamin A; Copper		(M5909)HALLMARK MYOGENESIS; (M5953)HALLMARK KRAS SIGNALING UP	0.0	1.0	0.0	0.0	1.0	0.0	0.0	0.0	0.0	1.0	0.0	0.0	0.0	1.0	0.0	0.0	0.0	1.0	1.0	1.0
KIAA1644	85352	gene_synonym	H. sapiens	85352	H. sapiens	SHISAL1	shisa like 1				Cytosol;Vesicles (Approved)				0.0	0.0	0.0	0.0	0.0	0.0	0.0	0.0	0.0	0.0	0.0	0.0	0.0	0.0	0.0	0.0	0.0	0.0	0.0	0.0
HMOX1	3162	symbol	H. sapiens	3162	H. sapiens	HMOX1	heme oxygenase 1	GO:0032764 negative regulation of mast cell cytokine production;GO:0006788 heme oxidation;GO:0014806 smooth muscle hyperplasia		ENZYME proteins:Oxidoreductases; Cancer-related genes:Candidate cancer biomarkers; Human disease related genes:Respiratory diseases:Lung diseases; Disease related genes; Potential drug targets; Enzymes; Predicted intracellular proteins	Golgi apparatus;Plasma membrane (Uncertain)	NADH; Formic acid; Biliverdine IX Alpha; 12-Phenylheme; 2-Phenylheme; Verdoheme; Stannsoporfin; 1-({2-[2-(4-CHLOROPHENYL)ETHYL]-1,3-DIOXOLAN-2-YL}METHYL)-1H-IMIDAZOLE; 1-(adamantan-1-yl)-2-(1H-imidazol-1-yl)ethanone	(M65)PID FRA PATHWAY; (M255)PID HIF1 TFPATHWAY	(M5897)HALLMARK IL6 JAK STAT3 SIGNALING; (M5941)HALLMARK UV RESPONSE UP; (M5902)HALLMARK APOPTOSIS	0.0	1.0	1.0	1.0	1.0	0.0	1.0	1.0	0.0	1.0	0.0	1.0	1.0	1.0	0.0	0.0	1.0	0.0	1.0	1.0
TMEM132B	114795	symbol	H. sapiens	114795	H. sapiens	TMEM132B	transmembrane protein 132B	GO:0008150 biological_process							0.0	0.0	0.0	0.0	0.0	0.0	0.0	0.0	0.0	0.0	0.0	0.0	0.0	0.0	0.0	0.0	0.0	0.0	0.0	0.0
C2	717	symbol	H. sapiens	717	H. sapiens	C2	complement C2	GO:2000427 positive regulation of apoptotic cell clearance;GO:2000425 regulation of apoptotic cell clearance;GO:0097066 response to thyroid hormone		Human disease related genes:Immune system diseases:Primary immunodeficiency; Human disease related genes:Immune system diseases:Allergies and autoimmune diseases; ENZYME proteins:Hydrolases; Predicted secreted proteins; Human disease related genes:Nervous system diseases:Eye disease; Disease related genes; Potential drug targets; Enzymes; Predicted intracellular proteins; Peptidases:Serine-type p…				(M5946)HALLMARK COAGULATION; (M5921)HALLMARK COMPLEMENT; (M5950)HALLMARK ALLOGRAFT REJECTION	0.0	0.0	0.0	1.0	0.0	1.0	0.0	0.0	0.0	0.0	0.0	0.0	0.0	0.0	0.0	0.0	0.0	0.0	0.0	0.0
RBM47	54502	symbol	H. sapiens	54502	H. sapiens	RBM47	RNA binding motif protein 47	GO:0016554 cytidine to uridine editing;GO:0016553 base conversion or substitution editing;GO:0002244 hematopoietic progenitor cell differentiation		Predicted intracellular proteins	Cytosol;Nucleoplasm (Approved)				0.0	0.0	0.0	0.0	0.0	0.0	0.0	0.0	0.0	0.0	0.0	0.0	0.0	0.0	0.0	0.0	0.0	0.0	0.0	0.0
CLIC2	1193	symbol	H. sapiens	1193	H. sapiens	CLIC2	chloride intracellular channel 2	GO:0060315 negative regulation of ryanodine-sensitive calcium-release channel activity;GO:0051280 negative regulation of release of sequestered calcium ion into cytosol;GO:0051284 positive regulation of sequestering of calcium ion		Human disease related genes:Other diseases:Mental and behavioural disorders; Disease related genes; Potential drug targets; Transporters:Transporter channels and pores; Predicted intracellular proteins	Cytosol;Plasma membrane (Supported); Additional: Nucleoplasm			(M5945)HALLMARK HEME METABOLISM	0.0	0.0	0.0	0.0	1.0	0.0	0.0	0.0	0.0	0.0	0.0	1.0	0.0	0.0	0.0	0.0	0.0	0.0	0.0	0.0
TRIM25	7706	symbol	H. sapiens	7706	H. sapiens	TRIM25	tripartite motif containing 25	GO:0044790 suppression of viral release by host;GO:0046597 negative regulation of viral entry into host cell;GO:1903901 negative regulation of viral life cycle		ENZYME proteins:Ligase; Cancer-related genes:Candidate cancer biomarkers; Enzymes; Predicted intracellular proteins; ENZYME proteins:Transferases	Cytosol;Nucleoplasm (Approved); Additional: Nuclear bodies			(M5911)HALLMARK INTERFERON ALPHA RESPONSE; (M5913)HALLMARK INTERFERON GAMMA RESPONSE	0.0	0.0	0.0	1.0	0.0	0.0	0.0	1.0	0.0	0.0	0.0	0.0	0.0	0.0	0.0	0.0	1.0	0.0	0.0	0.0
BRINP1	1620	symbol	H. sapiens	1620	H. sapiens	BRINP1	BMP/retinoic acid inducible neural specific 1	GO:0042711 maternal behavior;GO:0007614 short-term memory;GO:0060746 parental behavior		Transporters:Transporter channels and pores; Predicted intracellular proteins	Microtubules (Uncertain)				0.0	0.0	0.0	1.0	0.0	0.0	0.0	0.0	0.0	0.0	0.0	0.0	0.0	0.0	0.0	0.0	0.0	0.0	0.0	0.0
FGF9	2254	symbol	H. sapiens	2254	H. sapiens	FGF9	fibroblast growth factor 9	GO:1900240 negative regulation of phenotypic switching;GO:1905916 negative regulation of cell differentiation involved in phenotypic switching;GO:1905931 negative regulation of vascular associated smooth muscle cell differentiation involved in phenotypic switching		Cancer-related genes:Candidate cancer biomarkers; Predicted secreted proteins; Human disease related genes:Congenital malformations:Congenital malformations of the musculoskeletal system; Disease related genes; RAS pathway related proteins; Predicted intracellular proteins			(M276)PID FGF PATHWAY; (M5883)NABA SECRETED FACTORS; (M5885)NABA MATRISOME ASSOCIATED	(M5953)HALLMARK KRAS SIGNALING UP	1.0	0.0	1.0	0.0	0.0	1.0	0.0	1.0	0.0	1.0	1.0	0.0	1.0	0.0	1.0	1.0	0.0	0.0	0.0	0.0
EML6	400954	symbol	H. sapiens	400954	H. sapiens	EML6	EMAP like 6			Predicted intracellular proteins	Mitochondria (Approved); Additional: Vesicles				0.0	0.0	0.0	0.0	0.0	0.0	0.0	0.0	0.0	0.0	0.0	0.0	0.0	0.0	0.0	0.0	0.0	0.0	0.0	0.0
FAM134B	54463	gene_synonym	H. sapiens	54463	H. sapiens	RETREG1	reticulophagy regulator 1	GO:0061709 reticulophagy;GO:0000423 mitophagy;GO:0050872 white fat cell differentiation		Potential drug targets; Transporters; Disease related genes; Human disease related genes:Nervous system diseases:Other nervous and sensory system diseases	Endoplasmic reticulum (Supported)			(M5906)HALLMARK ESTROGEN RESPONSE EARLY	0.0	0.0	0.0	0.0	0.0	0.0	0.0	0.0	0.0	0.0	0.0	0.0	0.0	0.0	0.0	0.0	0.0	0.0	0.0	0.0
LNX1	84708	symbol	H. sapiens	84708	H. sapiens	LNX1	ligand of numb-protein X 1	GO:0006511 ubiquitin-dependent protein catabolic process;GO:0019941 modification-dependent protein catabolic process;GO:0043632 modification-dependent macromolecule catabolic process		Enzymes; Predicted intracellular proteins; ENZYME proteins:Transferases	Cell Junctions (Supported); Additional: Cytosol		(M17)PID NOTCH PATHWAY		0.0	0.0	0.0	0.0	0.0	0.0	0.0	0.0	0.0	0.0	0.0	0.0	0.0	0.0	0.0	0.0	0.0	0.0	0.0	0.0
TSPAN11	441631	symbol	H. sapiens	441631	H. sapiens	TSPAN11	tetraspanin 11	GO:0016477 cell migration;GO:0048870 cell motility;GO:0051674 localization of cell			Vesicles (Approved)				0.0	0.0	0.0	0.0	0.0	0.0	0.0	0.0	0.0	0.0	0.0	0.0	0.0	0.0	0.0	0.0	0.0	0.0	0.0	0.0
FAM13A-AS1	285512	symbol	H. sapiens	285512	H. sapiens	FAM13A-AS1	FAM13A antisense RNA 1								0.0	0.0	0.0	0.0	0.0	0.0	0.0	0.0	0.0	0.0	0.0	0.0	0.0	0.0	0.0	0.0	0.0	0.0	0.0	0.0
FGF7	2252	symbol	H. sapiens	2252	H. sapiens	FGF7	fibroblast growth factor 7	GO:0060665 regulation of branching involved in salivary gland morphogenesis by mesenchymal-epithelial signaling;GO:0061033 secretion by lung epithelial cell involved in lung growth;GO:0060501 positive regulation of epithelial cell proliferation involved in lung morphogenesis		RAS pathway related proteins; Predicted secreted proteins; Predicted intracellular proteins; Cancer-related genes:Candidate cancer biomarkers	Nucleoli;Nucleoplasm (Approved)		(M5883)NABA SECRETED FACTORS; (M5885)NABA MATRISOME ASSOCIATED; (M5889)NABA MATRISOME		1.0	0.0	1.0	0.0	0.0	1.0	0.0	1.0	0.0	0.0	1.0	0.0	1.0	0.0	0.0	1.0	0.0	1.0	1.0	0.0
PBX1	5087	symbol	H. sapiens	5087	H. sapiens	PBX1	PBX homeobox 1	GO:0001779 natural killer cell differentiation;GO:0035162 embryonic hemopoiesis;GO:0030325 adrenal gland development		Transcription factors:Helix-turn-helix domains; Human disease related genes:Cancers:Cancers of haematopoietic and lymphoid tissues; Human disease related genes:Congenital malformations:Congenital malformations of the urinary system; Disease related genes; Predicted intracellular proteins; Cancer-related genes	Nucleoplasm (Enhanced); Additional: Cytosol;Nuclear bodies		(M115)PID REG GR PATHWAY		0.0	0.0	0.0	0.0	0.0	0.0	0.0	1.0	1.0	1.0	0.0	0.0	0.0	0.0	1.0	0.0	0.0	0.0	0.0	0.0
GCLM	2730	symbol	H. sapiens	2730	H. sapiens	GCLM	glutamate-cysteine ligase modifier subunit	GO:0035227 regulation of glutamate-cysteine ligase activity;GO:0035229 positive regulation of glutamate-cysteine ligase activity;GO:0097069 cellular response to thyroxine stimulus		Predicted intracellular proteins; Cancer-related genes:Candidate cancer biomarkers	Cytosol;Nucleoplasm (Approved); Additional: Plasma membrane	Glutamic acid; Cysteine		(M5938)HALLMARK REACTIVE OXYGEN SPECIES PATHWAY; (M5948)HALLMARK BILE ACID METABOLISM; (M5945)HALLMARK HEME METABOLISM	0.0	0.0	0.0	1.0	0.0	1.0	1.0	0.0	0.0	0.0	1.0	1.0	0.0	0.0	0.0	0.0	1.0	0.0	0.0	0.0
ANKRD29	147463	symbol	H. sapiens	147463	H. sapiens	ANKRD29	ankyrin repeat domain 29			Predicted intracellular proteins	Nuclear bodies;Nucleoplasm (Approved)				0.0	0.0	0.0	0.0	0.0	0.0	0.0	0.0	0.0	0.0	0.0	0.0	0.0	0.0	0.0	0.0	0.0	0.0	0.0	0.0
DNM3	26052	symbol	H. sapiens	26052	H. sapiens	DNM3	dynamin 3	GO:0098884 postsynaptic neurotransmitter receptor internalization;GO:0140239 postsynaptic endocytosis;GO:0061002 negative regulation of dendritic spine morphogenesis		Enzymes; ENZYME proteins:Hydrolases; Predicted intracellular proteins	Golgi apparatus (Approved)				0.0	0.0	0.0	0.0	0.0	1.0	0.0	0.0	0.0	0.0	0.0	0.0	1.0	0.0	0.0	1.0	0.0	1.0	0.0	0.0
ALDH1A3	220	symbol	H. sapiens	220	H. sapiens	ALDH1A3	aldehyde dehydrogenase 1 family member A3	GO:0021768 nucleus accumbens development;GO:0060166 olfactory pit development;GO:0070384 Harderian gland development		Human disease related genes:Congenital malformations:Congenital malformations of eye; ENZYME proteins:Oxidoreductases; Disease related genes; Potential drug targets; Enzymes; Predicted intracellular proteins	Nucleoplasm (Supported); Additional: Cytosol	NADH; Vitamin A		(M5908)HALLMARK ANDROGEN RESPONSE; (M5953)HALLMARK KRAS SIGNALING UP	0.0	0.0	0.0	0.0	0.0	0.0	0.0	0.0	1.0	0.0	0.0	0.0	0.0	0.0	0.0	0.0	0.0	0.0	0.0	0.0
TAF4B	6875	symbol	H. sapiens	6875	H. sapiens	TAF4B	TATA-box binding protein associated factor 4b	GO:0042789 mRNA transcription by RNA polymerase II;GO:0009299 mRNA transcription;GO:0060261 positive regulation of transcription initiation from RNA polymerase II promoter		Predicted intracellular proteins; Disease related genes; Human disease related genes:Reproductive system diseases:Reproductive system diseases	Nucleoplasm (Supported); Additional: Nucleoli fibrillar center		(M66)PID MYC ACTIV PATHWAY		0.0	0.0	0.0	0.0	0.0	0.0	0.0	0.0	0.0	0.0	0.0	0.0	0.0	0.0	0.0	0.0	0.0	0.0	0.0	0.0
LINC01252	338817	symbol	H. sapiens	338817	H. sapiens	LINC01252	long intergenic non-protein coding RNA 1252								0.0	0.0	0.0	0.0	0.0	0.0	0.0	0.0	0.0	0.0	0.0	0.0	0.0	0.0	0.0	0.0	0.0	0.0	0.0	0.0
MOB3B	79817	symbol	H. sapiens	79817	H. sapiens	MOB3B	MOB kinase activator 3B	GO:0035330 regulation of hippo signaling;GO:0032147 activation of protein kinase activity;GO:0045860 positive regulation of protein kinase activity		Predicted intracellular proteins	Cytosol;Intermediate filaments (Uncertain)				1.0	0.0	0.0	0.0	0.0	0.0	0.0	0.0	0.0	0.0	0.0	0.0	0.0	0.0	0.0	0.0	0.0	0.0	0.0	0.0
PRIMA1	145270	symbol	H. sapiens	145270	H. sapiens	PRIMA1	proline rich membrane anchor 1	GO:0042135 neurotransmitter catabolic process;GO:0042133 neurotransmitter metabolic process;GO:0001505 regulation of neurotransmitter levels			Plasma membrane (Approved); Additional: Cytosol;Nucleoli				0.0	0.0	0.0	0.0	0.0	0.0	0.0	0.0	0.0	0.0	0.0	0.0	0.0	0.0	0.0	0.0	0.0	0.0	0.0	0.0
CLEC2B	9976	symbol	H. sapiens	9976	H. sapiens	CLEC2B	C-type lectin domain family 2 member B			Predicted intracellular proteins			(M5880)NABA ECM AFFILIATED; (M5885)NABA MATRISOME ASSOCIATED; (M5889)NABA MATRISOME		0.0	0.0	0.0	0.0	0.0	1.0	0.0	1.0	0.0	0.0	0.0	0.0	0.0	0.0	0.0	0.0	0.0	0.0	0.0	0.0
FAM84A	151354	gene_synonym	H. sapiens	151354	H. sapiens	LRATD1	LRAT domain containing 1	GO:0000902 cell morphogenesis;GO:0048870 cell motility;GO:0051674 localization of cell		Predicted intracellular proteins	Nucleoplasm (Approved)				0.0	0.0	0.0	0.0	0.0	0.0	0.0	0.0	0.0	0.0	0.0	0.0	0.0	0.0	0.0	0.0	0.0	1.0	0.0	0.0
MIR497HG	100506755	symbol	H. sapiens	100506755	H. sapiens	MIR497HG	mir-497-195 cluster host gene								0.0	0.0	0.0	0.0	0.0	0.0	0.0	0.0	0.0	0.0	0.0	0.0	0.0	0.0	0.0	0.0	0.0	0.0	0.0	0.0
S1PR1	1901	symbol	H. sapiens	1901	H. sapiens	S1PR1	sphingosine-1-phosphate receptor 1	GO:0003245 cardiac muscle tissue growth involved in heart morphogenesis;GO:0003241 growth involved in heart morphogenesis;GO:0001955 blood vessel maturation		Transporters; FDA approved drug targets:Small molecule drugs; G-protein coupled receptors:Lysolipids receptors; CD markers; Cancer-related genes:Candidate cancer biomarkers; FDA approved drug targets:Biotech drugs; G-protein coupled receptors:GPCRs excl olfactory receptors	Vesicles (Supported)	Fingolimod; Asfotase alfa; Siponimod; Ozanimod	(M103)PID S1P S1P1 PATHWAY; (M155)PID S1P META PATHWAY; (M55)PID S1P S1P3 PATHWAY		0.0	1.0	1.0	0.0	0.0	0.0	0.0	1.0	0.0	1.0	0.0	1.0	0.0	0.0	0.0	0.0	1.0	1.0	0.0	0.0
ELK3	2004	symbol	H. sapiens	2004	H. sapiens	ELK3	ETS transcription factor ELK3	GO:0001525 angiogenesis;GO:0042060 wound healing;GO:0048514 blood vessel morphogenesis		Transcription factors:Helix-turn-helix domains; Predicted intracellular proteins; Cancer-related genes:Candidate cancer biomarkers	Nucleoplasm (Supported); Additional: Mitochondria				0.0	0.0	0.0	0.0	0.0	0.0	0.0	0.0	0.0	1.0	0.0	0.0	0.0	0.0	0.0	0.0	0.0	0.0	1.0	0.0
NABP1	64859	symbol	H. sapiens	64859	H. sapiens	NABP1	nucleic acid binding protein 1	GO:0044818 mitotic G2/M transition checkpoint;GO:0010972 negative regulation of G2/M transition of mitotic cell cycle;GO:1902750 negative regulation of cell cycle G2/M phase transition		Predicted intracellular proteins	Nucleoplasm (Enhanced); Additional: Cytosol			(M5922)HALLMARK UNFOLDED PROTEIN RESPONSE; (M5905)HALLMARK ADIPOGENESIS	0.0	0.0	0.0	0.0	0.0	0.0	0.0	0.0	0.0	0.0	0.0	0.0	0.0	0.0	0.0	0.0	0.0	0.0	0.0	0.0
DGAT2	84649	symbol	H. sapiens	84649	H. sapiens	DGAT2	diacylglycerol O-acyltransferase 2	GO:0071400 cellular response to oleic acid;GO:0034201 response to oleic acid;GO:0060613 fat pad development		FDA approved drug targets:Small molecule drugs; FDA approved drug targets:Biotech drugs; Enzymes; Predicted intracellular proteins; ENZYME proteins:Transferases	Cytosol;Vesicles (Approved)	Omega-3-carboxylic acids; Fish oil			0.0	0.0	0.0	1.0	0.0	0.0	0.0	0.0	1.0	0.0	0.0	1.0	0.0	0.0	0.0	0.0	0.0	0.0	0.0	0.0
IL22RA1	58985	symbol	H. sapiens	58985	H. sapiens	IL22RA1	interleukin 22 receptor subunit alpha 1	GO:0050829 defense response to Gram-negative bacterium;GO:0042742 defense response to bacterium;GO:0019221 cytokine-mediated signaling pathway							0.0	0.0	0.0	0.0	0.0	0.0	0.0	0.0	0.0	0.0	0.0	0.0	0.0	0.0	0.0	0.0	1.0	0.0	0.0	0.0
SERPINF1	5176	symbol	H. sapiens	5176	H. sapiens	SERPINF1	serpin family F member 1	GO:0071279 cellular response to cobalt ion;GO:0060770 negative regulation of epithelial cell proliferation involved in prostate gland development;GO:0060768 regulation of epithelial cell proliferation involved in prostate gland development		Cancer-related genes:Candidate cancer biomarkers; Predicted secreted proteins; Human disease related genes:Congenital malformations:Congenital malformations of the musculoskeletal system; Disease related genes; Predicted intracellular proteins		Copper	(M3468)NABA ECM REGULATORS; (M5885)NABA MATRISOME ASSOCIATED; (M5889)NABA MATRISOME		0.0	0.0	0.0	1.0	0.0	1.0	0.0	0.0	0.0	0.0	0.0	1.0	1.0	0.0	0.0	0.0	0.0	1.0	0.0	0.0
LPXN	9404	symbol	H. sapiens	9404	H. sapiens	LPXN	leupaxin	GO:0050859 negative regulation of B cell receptor signaling pathway;GO:0050855 regulation of B cell receptor signaling pathway;GO:0050858 negative regulation of antigen receptor-mediated signaling pathway		Predicted intracellular proteins	Focal adhesion sites (Supported); Additional: Cytosol;Nuclear speckles				0.0	1.0	0.0	0.0	0.0	0.0	0.0	0.0	0.0	0.0	1.0	0.0	1.0	1.0	0.0	0.0	0.0	1.0	0.0	1.0
OLFM1	10439	symbol	H. sapiens	10439	H. sapiens	OLFM1	olfactomedin 1	GO:0023041 neuronal signal transduction;GO:0003190 atrioventricular valve formation;GO:0003188 heart valve formation		Predicted secreted proteins; Predicted intracellular proteins	Nucleoli (Approved); Additional: Cytosol;Nucleoplasm			(M5941)HALLMARK UV RESPONSE UP; (M5906)HALLMARK ESTROGEN RESPONSE EARLY; (M5907)HALLMARK ESTROGEN RESPONSE LATE	0.0	0.0	0.0	0.0	0.0	0.0	0.0	0.0	0.0	1.0	0.0	0.0	0.0	0.0	0.0	0.0	0.0	0.0	0.0	0.0
B3GLCT	145173	symbol	H. sapiens	145173	H. sapiens	B3GLCT	beta 3-glucosyltransferase	GO:0036066 protein O-linked fucosylation;GO:0006004 fucose metabolic process;GO:0036065 fucosylation		Human disease related genes:Congenital malformations:Congenital malformations of eye; Predicted intracellular proteins; Disease related genes					0.0	0.0	0.0	0.0	0.0	0.0	0.0	0.0	0.0	0.0	0.0	0.0	0.0	0.0	0.0	0.0	0.0	0.0	0.0	0.0
IRAK3	11213	symbol	H. sapiens	11213	H. sapiens	IRAK3	interleukin 1 receptor associated kinase 3	GO:0010932 regulation of macrophage tolerance induction;GO:0010933 positive regulation of macrophage tolerance induction;GO:0010936 negative regulation of macrophage cytokine production	TKL Ser/Thr protein kinase family	Kinases:TKL Ser/Thr protein kinases; Disease related genes; Potential drug targets; Enzymes; Predicted intracellular proteins; ENZYME proteins:Transferases	Vesicles (Approved)	Fostamatinib	(M110)PID IL1 PATHWAY		1.0	0.0	0.0	0.0	0.0	0.0	0.0	1.0	0.0	0.0	0.0	0.0	0.0	1.0	0.0	0.0	1.0	0.0	0.0	0.0
MMP12	4321	symbol	H. sapiens	4321	H. sapiens	MMP12	matrix metallopeptidase 12	GO:1904905 negative regulation of endothelial cell-matrix adhesion via fibronectin;GO:0060309 elastin catabolic process;GO:0060435 bronchiole development		Cancer-related genes:Candidate cancer biomarkers; ENZYME proteins:Hydrolases; Predicted secreted proteins; Peptidases:Metallopeptidases; Enzymes		Acetohydroxamic acid; Marimastat; CP-271485; PF-00356231; Batimastat; 2-[2-(1,3-Dioxo-1,3-Dihydro-2h-Isoindol-2-Yl)Ethyl]-4-(4'-Ethoxy-1,1'-Biphenyl-4-Yl)-4-Oxobutanoic Acid; AE-941; (1S,5S,7R)-N~7~-(BIPHENYL-4-YLMETHYL)-N~3~-HYDROXY-6,8-DIOXA-3-AZABICYCLO[3.2.1]OCTANE-3,7-DICARBOXAMIDE; N-(biphenyl-4-ylsulfonyl)-D-leucine; CGS-27023; N-(dibenzo[b,d]thiophen-3-ylsulfonyl)-L-valine; N-oxo-2-[(4-ph…	(M174)PID UPA UPAR PATHWAY; (M3468)NABA ECM REGULATORS; (M5885)NABA MATRISOME ASSOCIATED	(M5921)HALLMARK COMPLEMENT	0.0	1.0	1.0	0.0	0.0	1.0	0.0	1.0	0.0	0.0	0.0	0.0	0.0	1.0	0.0	0.0	0.0	0.0	1.0	0.0
METTL7A	25840	symbol	H. sapiens	25840	H. sapiens	METTL7A	methyltransferase like 7A	GO:0032259 methylation;GO:0008152 metabolic process;GO:0008150 biological_process			Lipid droplets (Supported)				0.0	0.0	0.0	0.0	0.0	0.0	0.0	0.0	0.0	0.0	0.0	0.0	0.0	0.0	0.0	0.0	0.0	0.0	0.0	0.0
APBB1IP	54518	symbol	H. sapiens	54518	H. sapiens	APBB1IP	amyloid beta precursor protein binding family B member 1 interacting protein	GO:0002291 T cell activation via T cell receptor contact with antigen bound to MHC molecule on antigen presenting cell;GO:0002286 T cell activation involved in immune response;GO:0002285 lymphocyte activation involved in immune response		Predicted intracellular proteins	Cytosol;Plasma membrane (Enhanced)				0.0	1.0	0.0	0.0	0.0	0.0	0.0	0.0	0.0	0.0	0.0	0.0	1.0	0.0	0.0	1.0	0.0	0.0	1.0	0.0
MAOA	4128	symbol	H. sapiens	4128	H. sapiens	MAOA	monoamine oxidase A	GO:0019614 catechol-containing compound catabolic process;GO:0042420 dopamine catabolic process;GO:0042424 catecholamine catabolic process		FDA approved drug targets:Small molecule drugs; Human disease related genes:Other diseases:Mental and behavioural disorders; ENZYME proteins:Oxidoreductases; Human disease related genes:Congenital disorders of metabolism:Congenital disorders of amino acid metabolism; Disease related genes; Enzymes	Mitochondria (Supported); Additional: Cytosol	Amphetamine; Phentermine; Procaine; Tranylcypromine; Phenelzine; Minaprine; Zonisamide; Selegiline; Procarbazine; Moclobemide; Isocarboxazid; Ephedra sinica root; MMDA; 4-Methoxyamphetamine; Metamfetamine; Pargyline; Flavin adenine dinucleotide; Clorgiline; Nialamide; Nomifensine; Zimelidine; Posizolid; CX157; Decyl(dimethyl)phosphine oxide; Harmine; Pirlindole; Toloxatone; Brofaromine; Flortauci…		(M5935)HALLMARK FATTY ACID METABOLISM; (M5941)HALLMARK UV RESPONSE UP; (M5934)HALLMARK XENOBIOTIC METABOLISM	0.0	0.0	0.0	0.0	0.0	0.0	0.0	0.0	1.0	0.0	0.0	0.0	0.0	0.0	0.0	0.0	1.0	0.0	0.0	0.0
STC1	6781	symbol	H. sapiens	6781	H. sapiens	STC1	stanniocalcin 1	GO:0003421 growth plate cartilage axis specification;GO:1903402 regulation of renal phosphate excretion;GO:1903403 negative regulation of renal phosphate excretion		Predicted secreted proteins; Predicted intracellular proteins				(M5944)HALLMARK ANGIOGENESIS; (M5891)HALLMARK HYPOXIA; (M5924)HALLMARK MTORC1 SIGNALING	0.0	0.0	0.0	1.0	0.0	0.0	0.0	0.0	0.0	0.0	0.0	1.0	0.0	0.0	1.0	0.0	0.0	1.0	0.0	0.0
ABI1	10006	symbol	H. sapiens	10006	H. sapiens	ABI1	abl interactor 1	GO:0072673 lamellipodium morphogenesis;GO:0035855 megakaryocyte development;GO:0030219 megakaryocyte differentiation		Predicted intracellular proteins; Cancer-related genes; Disease related genes	Cell Junctions;Plasma membrane (Approved)		(M277)PID INTEGRIN A4B1 PATHWAY; (M241)PID RAC1 REG PATHWAY; (M156)PID ECADHERIN NASCENT AJ PATHWAY	(M5893)HALLMARK MITOTIC SPINDLE; (M5932)HALLMARK INFLAMMATORY RESPONSE; (M5950)HALLMARK ALLOGRAFT REJECTION	1.0	0.0	0.0	0.0	0.0	0.0	0.0	1.0	0.0	0.0	0.0	0.0	1.0	0.0	0.0	0.0	0.0	1.0	0.0	0.0
RPGRIP1L	23322	symbol	H. sapiens	23322	H. sapiens	RPGRIP1L	RPGRIP1 like	GO:0046548 retinal rod cell development;GO:0060221 retinal rod cell differentiation;GO:0021670 lateral ventricle development		Human disease related genes:Congenital malformations:Congenital malformations of the nervous system; Predicted intracellular proteins; Disease related genes; Human disease related genes:Congenital malformations:Congenital malformations of the urinary system	Cytosol;Plasma membrane (Approved)				0.0	0.0	0.0	0.0	0.0	0.0	0.0	0.0	0.0	1.0	0.0	0.0	0.0	0.0	0.0	0.0	0.0	0.0	0.0	0.0
METTL9	51108	symbol	H. sapiens	51108	H. sapiens	METTL9	methyltransferase like 9	GO:0032259 methylation;GO:0008152 metabolic process;GO:0008150 biological_process		Predicted intracellular proteins	Cell Junctions;Nucleoplasm (Approved); Additional: Cytosol				0.0	0.0	0.0	0.0	0.0	0.0	0.0	0.0	0.0	0.0	0.0	0.0	0.0	0.0	0.0	0.0	0.0	0.0	0.0	0.0
KDR	3791	symbol	H. sapiens	3791	H. sapiens	KDR	kinase insert domain receptor	GO:1904881 cellular response to hydrogen sulfide;GO:0048597 post-embryonic camera-type eye morphogenesis;GO:1904880 response to hydrogen sulfide	Tyr protein kinase family	Human disease related genes:Cardiovascular diseases:Vascular diseases; FDA approved drug targets:Small molecule drugs; CD markers; Cancer-related genes:Candidate cancer biomarkers; FDA approved drug targets:Biotech drugs; Kinases:Tyr protein kinases; Disease related genes; Enzymes; RAS pathway related proteins; ENZYME proteins:Transferases	Vesicles (Approved); Additional: Nuclear membrane	Sorafenib; Sunitinib; 1-{4-[4-Amino-6-(4-methoxyphenyl)furo[2,3-d]pyrimidin-5-yl]phenyl}-3-[2-fluoro-5-(trifluoromethyl)phenyl]urea; Cediranib; Vatalanib; XL999; TG-100801; XL820; CYC116; Ramucirumab; Pegdinetanib; RAF-265; ABT-869; IMC-1C11; Semaxanib; Pazopanib; Midostaurin; Axitinib; 4-[[2-[[4-chloro-3-(trifluoromethyl)phenyl]amino]-3H-benzimidazol-5-yl]oxy]-N-methyl-pyridine-2-carboxamide; N-…	(M137)PID VEGF VEGFR PATHWAY; (M103)PID S1P S1P1 PATHWAY; (M44)PID HIF2PATHWAY		1.0	1.0	1.0	0.0	0.0	1.0	0.0	1.0	0.0	1.0	1.0	1.0	1.0	0.0	1.0	1.0	0.0	0.0	1.0	0.0
C8orf33	65265	symbol	H. sapiens	65265	H. sapiens	C8orf33	chromosome 8 open reading frame 33			Predicted intracellular proteins	Nucleoplasm;Plasma membrane (Uncertain)				0.0	0.0	0.0	0.0	0.0	0.0	0.0	0.0	0.0	0.0	0.0	0.0	0.0	0.0	0.0	0.0	0.0	0.0	0.0	0.0
FOXO1	2308	symbol	H. sapiens	2308	H. sapiens	FOXO1	forkhead box O1	GO:0071455 cellular response to hyperoxia;GO:0010616 negative regulation of cardiac muscle adaptation;GO:1903243 negative regulation of cardiac muscle hypertrophy in response to stress		Transcription factors:Helix-turn-helix domains; Cancer-related genes:Candidate cancer biomarkers; Human disease related genes:Cancers:Cancers of soft tissues and bone; Human disease related genes:Cancers:Cancers of haematopoietic and lymphoid tissues; Disease related genes; Predicted intracellular proteins	Cytosol;Nucleoplasm (Supported)		(M32)PID HDAC CLASSIII PATHWAY; (M249)PID PI3KCI AKT PATHWAY; (M183)PID IL6 7 PATHWAY	(M5957)HALLMARK PANCREAS BETA CELLS	1.0	0.0	0.0	1.0	0.0	0.0	1.0	1.0	0.0	1.0	0.0	1.0	1.0	0.0	0.0	0.0	1.0	0.0	0.0	0.0
GPR68	8111	symbol	H. sapiens	8111	H. sapiens	GPR68	G protein-coupled receptor 68	GO:2001206 positive regulation of osteoclast development;GO:0045656 negative regulation of monocyte differentiation;GO:2001204 regulation of osteoclast development		G-protein coupled receptors:GPCRs excl olfactory receptors; Human disease related genes:Digestive system diseases:Mouth and dental diseases; Disease related genes; Potential drug targets					0.0	0.0	0.0	0.0	0.0	0.0	0.0	0.0	0.0	0.0	0.0	0.0	0.0	1.0	0.0	0.0	0.0	1.0	0.0	0.0
CD109	135228	symbol	H. sapiens	135228	H. sapiens	CD109	CD109 molecule	GO:0072675 osteoclast fusion;GO:0072674 multinuclear osteoclast differentiation;GO:0010839 negative regulation of keratinocyte proliferation		CD markers	Plasma membrane (Supported); Additional: Cytosol		(M3468)NABA ECM REGULATORS; (M5885)NABA MATRISOME ASSOCIATED; (M5889)NABA MATRISOME		0.0	0.0	0.0	0.0	0.0	1.0	0.0	0.0	0.0	0.0	0.0	0.0	0.0	0.0	0.0	0.0	0.0	0.0	1.0	0.0
JAM3	83700	symbol	H. sapiens	83700	H. sapiens	JAM3	junctional adhesion molecule 3	GO:0090138 regulation of actin cytoskeleton organization by cell-cell adhesion;GO:0033624 negative regulation of integrin activation;GO:0002318 myeloid progenitor cell differentiation		Predicted secreted proteins; Predicted intracellular proteins; Disease related genes; Human disease related genes:Nervous system diseases:Other nervous and sensory system diseases	Golgi apparatus (Enhanced)		(M169)PID INTEGRIN2 PATHWAY; (M159)PID AMB2 NEUTROPHILS PATHWAY	(M5951)HALLMARK SPERMATOGENESIS; (M5915)HALLMARK APICAL JUNCTION	0.0	1.0	1.0	0.0	0.0	1.0	0.0	1.0	0.0	1.0	0.0	0.0	0.0	1.0	0.0	0.0	0.0	0.0	1.0	1.0
MMP2	4313	symbol	H. sapiens	4313	H. sapiens	MMP2	matrix metallopeptidase 2	GO:0014012 peripheral nervous system axon regeneration;GO:0001957 intramembranous ossification;GO:0036072 direct ossification		Candidate cardiovascular disease genes; Cancer-related genes:Candidate cancer biomarkers; ENZYME proteins:Hydrolases; Predicted secreted proteins; Human disease related genes:Cancers:Cancers of male genital organs; Cancer-related genes:Mutational cancer driver genes; Peptidases:Metallopeptidases; Human disease related genes:Cancers:Cancers of the breast and female genital organs; Human disease re…	Vesicles (Approved)	Marimastat; Captopril; SC-74020; Halofuginone; AE-941; Endostatin	(M63)PID AVB3 OPN PATHWAY; (M240)PID SYNDECAN 2 PATHWAY; (M65)PID FRA PATHWAY	(M5946)HALLMARK COAGULATION; (M5902)HALLMARK APOPTOSIS; (M5915)HALLMARK APICAL JUNCTION	0.0	1.0	1.0	1.0	0.0	1.0	0.0	1.0	0.0	1.0	0.0	1.0	1.0	1.0	1.0	0.0	1.0	1.0	1.0	0.0
ENPP2	5168	symbol	H. sapiens	5168	H. sapiens	ENPP2	ectonucleotide pyrophosphatase/phosphodiesterase 2	GO:2000394 positive regulation of lamellipodium morphogenesis;GO:2000392 regulation of lamellipodium morphogenesis;GO:0034638 phosphatidylcholine catabolic process		Cancer-related genes:Candidate cancer biomarkers; ENZYME proteins:Hydrolases; Predicted secreted proteins; Enzymes; Predicted intracellular proteins	Golgi apparatus;Nucleoplasm (Approved); Additional: Actin filaments			(M5905)HALLMARK ADIPOGENESIS	1.0	0.0	1.0	0.0	0.0	0.0	0.0	0.0	0.0	0.0	0.0	0.0	0.0	0.0	0.0	0.0	0.0	1.0	0.0	0.0
KCNJ15	3772	symbol	H. sapiens	3772	H. sapiens	KCNJ15	potassium inwardly rectifying channel subfamily J member 15	GO:1990573 potassium ion import across plasma membrane;GO:0098659 inorganic cation import across plasma membrane;GO:0099587 inorganic ion import across plasma membrane		Voltage-gated ion channels:Inwardly Rectifying Potassium Channels; FDA approved drug targets:Small molecule drugs; Predicted intracellular proteins	Plasma membrane (Approved); Additional: Cytosol;Vesicles		(M118)PID INTEGRIN A9B1 PATHWAY		0.0	0.0	0.0	0.0	0.0	0.0	1.0	0.0	0.0	0.0	0.0	0.0	0.0	0.0	0.0	0.0	0.0	0.0	0.0	0.0
MSTN	2660	symbol	H. sapiens	2660	H. sapiens	MSTN	myostatin	GO:0048632 negative regulation of skeletal muscle tissue growth;GO:0014839 myoblast migration involved in skeletal muscle regeneration;GO:0014859 negative regulation of skeletal muscle cell proliferation		Predicted secreted proteins; Human disease related genes:Musculoskeletal diseases:Muscular diseases; Disease related genes		MYO-029	(M5883)NABA SECRETED FACTORS; (M5885)NABA MATRISOME ASSOCIATED; (M5889)NABA MATRISOME		1.0	0.0	1.0	1.0	0.0	1.0	0.0	0.0	0.0	0.0	1.0	1.0	1.0	0.0	0.0	0.0	1.0	0.0	0.0	1.0
SRPX	8406	symbol	H. sapiens	8406	H. sapiens	SRPX	sushi repeat containing protein X-linked	GO:0060244 negative regulation of cell proliferation involved in contact inhibition;GO:0060242 contact inhibition;GO:0060245 detection of cell density		Predicted secreted proteins			(M3008)NABA ECM GLYCOPROTEINS; (M5884)NABA CORE MATRISOME; (M5889)NABA MATRISOME	(M5916)HALLMARK APICAL SURFACE; (M5891)HALLMARK HYPOXIA	0.0	0.0	0.0	0.0	0.0	0.0	0.0	0.0	0.0	0.0	0.0	0.0	0.0	0.0	0.0	0.0	0.0	0.0	0.0	0.0
LOC285043	285043	Gene_ID	H. sapiens	285043	H. sapiens	LINC01936	long intergenic non-protein coding RNA 1936								0.0	0.0	0.0	0.0	0.0	0.0	0.0	0.0	0.0	0.0	0.0	0.0	0.0	0.0	0.0	0.0	0.0	0.0	0.0	0.0
GPNMB	10457	symbol	H. sapiens	10457	H. sapiens	GPNMB	glycoprotein nmb	GO:0031954 positive regulation of protein autophosphorylation;GO:0031952 regulation of protein autophosphorylation;GO:0050918 positive chemotaxis		Human disease related genes:Skin diseases:Skin and soft tissue diseases; Predicted intracellular proteins; Disease related genes		Glembatumumab vedotin		(M5953)HALLMARK KRAS SIGNALING UP	1.0	1.0	1.0	0.0	0.0	0.0	0.0	0.0	0.0	0.0	0.0	0.0	0.0	1.0	0.0	0.0	0.0	1.0	0.0	0.0
LINC00702	100652988	symbol	H. sapiens	100652988	H. sapiens	LINC00702	long intergenic non-protein coding RNA 702								0.0	0.0	0.0	0.0	0.0	0.0	0.0	0.0	0.0	0.0	0.0	0.0	0.0	0.0	0.0	0.0	0.0	0.0	0.0	0.0
MAPK14	1432	symbol	H. sapiens	1432	H. sapiens	MAPK14	mitogen-activated protein kinase 14	GO:0099179 regulation of synaptic membrane adhesion;GO:0090400 stress-induced premature senescence;GO:0070391 response to lipoteichoic acid	CMGC Ser/Thr protein kinase family	Cancer-related genes:Candidate cancer biomarkers; Kinases:CMGC Ser/Thr protein kinases; Enzymes; Predicted intracellular proteins; ENZYME proteins:Transferases	Nuclear speckles (Supported); Additional: Cytosol	Dasatinib; 4-[5-[2-(1-phenyl-ethylamino)-pyrimidin-4-yl]-1-methyl-4-(3-trifluoromethylphenyl)-1H-imidazol-2-yl]-piperidine; N-[(3Z)-5-Tert-butyl-2-phenyl-1,2-dihydro-3H-pyrazol-3-ylidene]-N'-(4-chlorophenyl)urea; 1-(2,6-Dichlorophenyl)-5-(2,4-Difluorophenyl)-7-Piperidin-4-Yl-3,4-Dihydroquinolin-2(1h)-One; Inhibitor of P38 Kinase; 6((S)-3-Benzylpiperazin-1-Yl)-3-(Naphthalen-2-Yl)-4-(Pyridin-4-Yl)P…	(M26)PID NFKAPPAB ATYPICAL PATHWAY; (M199)PID P38 MK2 PATHWAY; (M268)PID S1P S1P2 PATHWAY	(M5942)HALLMARK UV RESPONSE DN; (M5901)HALLMARK G2M CHECKPOINT; (M5915)HALLMARK APICAL JUNCTION	0.0	1.0	0.0	1.0	0.0	0.0	0.0	1.0	0.0	1.0	1.0	0.0	1.0	1.0	1.0	1.0	1.0	1.0	1.0	0.0
ATP2B1	490	symbol	H. sapiens	490	H. sapiens	ATP2B1	ATPase plasma membrane Ca2+ transporting 1	GO:0071386 cellular response to corticosterone stimulus;GO:1990034 calcium ion export across plasma membrane;GO:1901660 calcium ion export		Enzymes; Transporters:Primary Active Transporters; ENZYME proteins; FDA approved drug targets:Small molecule drugs	Plasma membrane (Supported)	Halothane	(M195)PID CMYB PATHWAY	(M5942)HALLMARK UV RESPONSE DN; (M5890)HALLMARK TNFA SIGNALING VIA NFKB; (M5932)HALLMARK INFLAMMATORY RESPONSE	0.0	0.0	0.0	1.0	1.0	0.0	1.0	1.0	0.0	0.0	0.0	1.0	0.0	1.0	0.0	0.0	0.0	0.0	1.0	0.0
IQCK	124152	symbol	H. sapiens	124152	H. sapiens	IQCK	IQ motif containing K			Predicted intracellular proteins	Nuclear speckles (Approved); Additional: Cytosol				0.0	0.0	0.0	0.0	0.0	0.0	0.0	0.0	0.0	0.0	0.0	0.0	0.0	0.0	0.0	0.0	0.0	0.0	0.0	0.0
RGCC	28984	symbol	H. sapiens	28984	H. sapiens	RGCC	regulator of cell cycle	GO:0001100 negative regulation of exit from mitosis;GO:0003331 positive regulation of extracellular matrix constituent secretion;GO:0090272 negative regulation of fibroblast growth factor production		Predicted intracellular proteins	Nucleoplasm (Supported); Additional: Nucleoli		(M145)PID P53 DOWNSTREAM PATHWAY		1.0	1.0	0.0	0.0	0.0	0.0	0.0	0.0	0.0	0.0	0.0	0.0	0.0	1.0	0.0	0.0	0.0	0.0	0.0	0.0
TSHZ2	128553	symbol	H. sapiens	128553	H. sapiens	TSHZ2	teashirt zinc finger homeobox 2	GO:0006357 regulation of transcription by RNA polymerase II;GO:0006355 regulation of transcription, DNA-templated;GO:1903506 regulation of nucleic acid-templated transcription		Transcription factors:Helix-turn-helix domains; Predicted intracellular proteins	Golgi apparatus (Approved); Additional: Nucleoplasm				0.0	0.0	0.0	0.0	0.0	0.0	0.0	0.0	0.0	0.0	0.0	0.0	0.0	0.0	0.0	0.0	0.0	0.0	0.0	0.0
ZNF331	55422	symbol	H. sapiens	55422	H. sapiens	ZNF331	zinc finger protein 331	GO:0006357 regulation of transcription by RNA polymerase II;GO:0006355 regulation of transcription, DNA-templated;GO:1903506 regulation of nucleic acid-templated transcription		Transcription factors:Zinc-coordinating DNA-binding domains; Predicted intracellular proteins; Cancer-related genes	Nucleoplasm (Approved)				0.0	0.0	0.0	0.0	0.0	0.0	0.0	0.0	0.0	0.0	0.0	0.0	0.0	0.0	0.0	0.0	0.0	0.0	0.0	0.0
ABLIM3	22885	symbol	H. sapiens	22885	H. sapiens	ABLIM3	actin binding LIM protein family member 3	GO:1903955 positive regulation of protein targeting to mitochondrion;GO:0030032 lamellipodium assembly;GO:1903749 positive regulation of establishment of protein localization to mitochondrion		Predicted intracellular proteins	Nucleoplasm;Plasma membrane (Approved); Additional: Cell Junctions				0.0	0.0	0.0	0.0	0.0	0.0	0.0	0.0	0.0	0.0	0.0	0.0	0.0	0.0	0.0	0.0	0.0	1.0	0.0	0.0
MASP1	5648	symbol	H. sapiens	5648	H. sapiens	MASP1	MBL associated serine protease 1	GO:0001867 complement activation, lectin pathway;GO:0006956 complement activation;GO:0006959 humoral immune response		Predicted secreted proteins; Human disease related genes:Congenital malformations:Other congenital malformations; Disease related genes; Potential drug targets; Enzymes; Predicted intracellular proteins; Peptidases:Serine-type peptidases	Cytosol;Nucleoplasm (Enhanced)		(M3468)NABA ECM REGULATORS; (M5885)NABA MATRISOME ASSOCIATED; (M5889)NABA MATRISOME		0.0	0.0	0.0	0.0	0.0	1.0	0.0	0.0	0.0	0.0	0.0	0.0	0.0	0.0	0.0	0.0	0.0	0.0	0.0	0.0
EMX2	2018	symbol	H. sapiens	2018	H. sapiens	EMX2	empty spiracles homeobox 2	GO:0072197 ureter morphogenesis;GO:0021796 cerebral cortex regionalization;GO:0021978 telencephalon regionalization		Transcription factors:Helix-turn-helix domains; Human disease related genes:Congenital malformations:Congenital malformations of the nervous system; Predicted intracellular proteins; Disease related genes	Nucleoplasm (Approved)				0.0	0.0	0.0	0.0	0.0	0.0	0.0	0.0	0.0	1.0	0.0	0.0	0.0	0.0	0.0	0.0	0.0	0.0	0.0	0.0
AK5	26289	symbol	H. sapiens	26289	H. sapiens	AK5	adenylate kinase 5	GO:0006173 dADP biosynthetic process;GO:0009183 purine deoxyribonucleoside diphosphate biosynthetic process;GO:0046056 dADP metabolic process		Enzymes; Predicted intracellular proteins; ENZYME proteins:Transferases	Cytosol (Supported); Additional: Centriolar satellite				0.0	0.0	0.0	0.0	0.0	0.0	0.0	0.0	0.0	0.0	0.0	0.0	0.0	0.0	0.0	0.0	0.0	0.0	0.0	0.0
CYP26B1	56603	symbol	H. sapiens	56603	H. sapiens	CYP26B1	cytochrome P450 family 26 subfamily B member 1	GO:2001035 regulation of tongue muscle cell differentiation;GO:2001037 positive regulation of tongue muscle cell differentiation;GO:1902811 positive regulation of skeletal muscle fiber differentiation		Predicted intracellular proteins; Disease related genes	Cytosol (Approved)	Tretinoin		(M5906)HALLMARK ESTROGEN RESPONSE EARLY; (M5907)HALLMARK ESTROGEN RESPONSE LATE	0.0	1.0	0.0	1.0	0.0	0.0	0.0	0.0	1.0	0.0	0.0	0.0	0.0	0.0	0.0	0.0	0.0	0.0	1.0	0.0
DPT	1805	symbol	H. sapiens	1805	H. sapiens	DPT	dermatopontin	GO:0030199 collagen fibril organization;GO:0030198 extracellular matrix organization;GO:0043062 extracellular structure organization		Predicted secreted proteins	Vesicles (Approved)		(M3008)NABA ECM GLYCOPROTEINS; (M5884)NABA CORE MATRISOME; (M5889)NABA MATRISOME		0.0	0.0	0.0	0.0	0.0	1.0	0.0	0.0	0.0	0.0	0.0	0.0	0.0	0.0	0.0	0.0	0.0	0.0	0.0	0.0
SH3D19	152503	symbol	H. sapiens	152503	H. sapiens	SH3D19	SH3 domain containing 19	GO:0051044 positive regulation of membrane protein ectodomain proteolysis;GO:0051043 regulation of membrane protein ectodomain proteolysis;GO:0045732 positive regulation of protein catabolic process		Predicted intracellular proteins	Cytosol;Nucleoplasm (Supported)				0.0	0.0	0.0	0.0	0.0	0.0	0.0	0.0	0.0	0.0	0.0	0.0	0.0	0.0	0.0	0.0	0.0	0.0	0.0	0.0
TMBIM6	7009	symbol	H. sapiens	7009	H. sapiens	TMBIM6	transmembrane BAX inhibitor motif containing 6	GO:0060701 negative regulation of ribonuclease activity;GO:0060702 negative regulation of endoribonuclease activity;GO:0060699 regulation of endoribonuclease activity		Transporters:Transporter channels and pores; Predicted intracellular proteins				(M5941)HALLMARK UV RESPONSE UP; (M5934)HALLMARK XENOBIOTIC METABOLISM	0.0	0.0	0.0	0.0	0.0	0.0	0.0	0.0	0.0	0.0	0.0	1.0	0.0	1.0	0.0	0.0	0.0	0.0	0.0	0.0
ZADH2	284273	symbol	H. sapiens	284273	H. sapiens	ZADH2	zinc binding alcohol dehydrogenase domain containing 2	GO:0006692 prostanoid metabolic process;GO:0006693 prostaglandin metabolic process;GO:0045599 negative regulation of fat cell differentiation		Enzymes; Predicted intracellular proteins; ENZYME proteins:Oxidoreductases	Vesicles (Approved); Additional: Golgi apparatus;Nucleoplasm				0.0	0.0	0.0	0.0	0.0	0.0	0.0	0.0	0.0	0.0	0.0	0.0	0.0	0.0	0.0	0.0	0.0	0.0	0.0	0.0
HTRA1	5654	symbol	H. sapiens	5654	H. sapiens	HTRA1	HtrA serine peptidase 1	GO:0060718 chorionic trophoblast cell differentiation;GO:0097187 dentinogenesis;GO:0060717 chorion development		Human disease related genes:Congenital malformations:Congenital malformations of the nervous system; Predicted secreted proteins; Human disease related genes:Nervous system diseases:Eye disease; Disease related genes; Potential drug targets; Enzymes; Predicted intracellular proteins; Peptidases:Serine-type peptidases	Plasma membrane (Supported)		(M3468)NABA ECM REGULATORS; (M5885)NABA MATRISOME ASSOCIATED; (M5889)NABA MATRISOME	(M5946)HALLMARK COAGULATION; (M5930)HALLMARK EPITHELIAL MESENCHYMAL TRANSITION	0.0	0.0	0.0	0.0	0.0	1.0	0.0	1.0	0.0	0.0	0.0	0.0	0.0	0.0	1.0	0.0	0.0	0.0	0.0	0.0
HIP1	3092	symbol	H. sapiens	3092	H. sapiens	HIP1	huntingtin interacting protein 1	GO:2000588 positive regulation of platelet-derived growth factor receptor-beta signaling pathway;GO:0010641 positive regulation of platelet-derived growth factor receptor signaling pathway;GO:2000586 regulation of platelet-derived growth factor receptor-beta signaling pathway		Predicted intracellular proteins; Cancer-related genes; Disease related genes	Vesicles (Supported)		(M58)PID AR PATHWAY		0.0	0.0	0.0	0.0	0.0	0.0	0.0	0.0	0.0	0.0	0.0	0.0	1.0	0.0	0.0	0.0	0.0	0.0	0.0	0.0
LOC100287846	100287846	Gene_ID	H. sapiens	100287846	H. sapiens	LOC100287846	uncharacterized LOC100287846								0.0	0.0	0.0	0.0	0.0	0.0	0.0	0.0	0.0	0.0	0.0	0.0	0.0	0.0	0.0	0.0	0.0	0.0	0.0	0.0
LOC101928370	101928370	Gene_ID	H. sapiens	101928370	H. sapiens	S1PR1-DT	S1PR1 divergent transcript								0.0	0.0	0.0	0.0	0.0	0.0	0.0	0.0	0.0	0.0	0.0	0.0	0.0	0.0	0.0	0.0	0.0	0.0	0.0	0.0
CD68	968	symbol	H. sapiens	968	H. sapiens	CD68	CD68 molecule	GO:0002605 negative regulation of dendritic cell antigen processing and presentation;GO:0002578 negative regulation of antigen processing and presentation;GO:0002604 regulation of dendritic cell antigen processing and presentation		Predicted intracellular proteins; CD markers	Golgi apparatus;Vesicles (Supported)				0.0	0.0	0.0	1.0	0.0	1.0	0.0	0.0	0.0	0.0	0.0	0.0	0.0	1.0	0.0	0.0	0.0	0.0	0.0	0.0
DPP4	1803	symbol	H. sapiens	1803	H. sapiens	DPP4	dipeptidyl peptidase 4	GO:0120116 glucagon processing;GO:0036343 psychomotor behavior;GO:0010716 negative regulation of extracellular matrix disassembly		FDA approved drug targets:Small molecule drugs; CD markers; ENZYME proteins:Hydrolases; Predicted secreted proteins; Enzymes; Predicted intracellular proteins; Peptidases:Serine-type peptidases		Atorvastatin; Sitagliptin; 2-Amino-3-Methyl-1-Pyrrolidin-1-Yl-Butan-1-One; 5-(Aminomethyl)-6-(2,4-Dichlorophenyl)-2-(3,5-Dimethoxyphenyl)Pyrimidin-4-Amine; (2s)-Pyrrolidin-2-Ylmethylamine; 4-Iodo-L-phenylalanine; Diisopropylphosphono Group; 1-(1-phenylcyclopentyl)methylamine; (S)-2-[(R)-3-amino-4-(2-fluorophenyl)butyryl]-1,2,3,4-tetrahydroisoquinoline-3-carboxamide; Vildagliptin; PSN9301; AMG-222…		(M5957)HALLMARK PANCREAS BETA CELLS; (M5946)HALLMARK COAGULATION; (M5921)HALLMARK COMPLEMENT	0.0	1.0	1.0	0.0	0.0	0.0	1.0	0.0	0.0	0.0	0.0	0.0	0.0	1.0	0.0	0.0	0.0	1.0	0.0	1.0
ESYT3	83850	symbol	H. sapiens	83850	H. sapiens	ESYT3	extended synaptotagmin 3	GO:0061817 endoplasmic reticulum-plasma membrane tethering;GO:0051643 endoplasmic reticulum localization;GO:0140056 organelle localization by membrane tethering		Transporters					0.0	0.0	0.0	0.0	0.0	0.0	0.0	0.0	1.0	0.0	0.0	0.0	0.0	0.0	0.0	0.0	0.0	0.0	0.0	0.0
SLC9B2	133308	symbol	H. sapiens	133308	H. sapiens	SLC9B2	solute carrier family 9 member B2	GO:2001206 positive regulation of osteoclast development;GO:2001204 regulation of osteoclast development;GO:0045672 positive regulation of osteoclast differentiation		Transporters:Electrochemical Potential-driven transporters	Cell Junctions;Nucleoplasm (Approved)				0.0	0.0	0.0	0.0	1.0	0.0	0.0	0.0	0.0	0.0	0.0	0.0	0.0	0.0	0.0	0.0	0.0	1.0	0.0	0.0
PDPN	10630	symbol	H. sapiens	10630	H. sapiens	PDPN	podoplanin	GO:1904328 regulation of myofibroblast contraction;GO:0060838 lymphatic endothelial cell fate commitment;GO:0060839 endothelial cell fate commitment			Plasma membrane (Supported); Additional: Cell Junctions;Mitochondria			(M5932)HALLMARK INFLAMMATORY RESPONSE	0.0	1.0	1.0	0.0	0.0	0.0	0.0	0.0	0.0	1.0	0.0	0.0	0.0	0.0	0.0	0.0	0.0	1.0	1.0	0.0
FOXP2	93986	symbol	H. sapiens	93986	H. sapiens	FOXP2	forkhead box P2	GO:0021757 caudate nucleus development;GO:0021758 putamen development;GO:0021756 striatum development		Transcription factors:Helix-turn-helix domains; Predicted intracellular proteins; Human disease related genes:Other diseases:Mental and behavioural disorders; Disease related genes	Nucleoplasm (Enhanced)				0.0	0.0	0.0	0.0	0.0	0.0	0.0	0.0	0.0	0.0	0.0	0.0	0.0	0.0	0.0	0.0	0.0	0.0	0.0	0.0
MILR1	284021	symbol	H. sapiens	284021	H. sapiens	MILR1	mast cell immunoglobulin like receptor 1	GO:0033004 negative regulation of mast cell activation;GO:0002279 mast cell activation involved in immune response;GO:0043303 mast cell degranulation		Predicted intracellular proteins					0.0	1.0	0.0	0.0	0.0	0.0	0.0	0.0	0.0	0.0	0.0	0.0	0.0	1.0	0.0	0.0	0.0	0.0	0.0	0.0
RPGR	6103	symbol	H. sapiens	6103	H. sapiens	RPGR	retinitis pigmentosa GTPase regulator	GO:0042073 intraciliary transport;GO:0031503 protein-containing complex localization;GO:0010970 transport along microtubule		Human disease related genes:Nervous system diseases:Eye disease; Predicted intracellular proteins; Cancer-related genes:Mutational cancer driver genes; Disease related genes	Golgi apparatus (Supported)				0.0	0.0	0.0	0.0	0.0	0.0	0.0	0.0	0.0	0.0	0.0	0.0	0.0	0.0	0.0	0.0	0.0	0.0	0.0	0.0
SNX24	28966	symbol	H. sapiens	28966	H. sapiens	SNX24	sorting nexin 24	GO:0015031 protein transport;GO:0045184 establishment of protein localization;GO:0071705 nitrogen compound transport		Predicted intracellular proteins	Vesicles (Approved)			(M5906)HALLMARK ESTROGEN RESPONSE EARLY	0.0	0.0	0.0	0.0	0.0	0.0	0.0	0.0	0.0	0.0	0.0	0.0	0.0	0.0	0.0	0.0	0.0	0.0	0.0	0.0
10-Sep						None	None	None	None	None	None	None	None	None	nan	nan	nan	nan	nan	nan	nan	nan	nan	nan	nan	nan	nan	nan	nan	nan	nan	nan	nan	nan
CEP44	80817	symbol	H. sapiens	80817	H. sapiens	CEP44	centrosomal protein 44	GO:0010457 centriole-centriole cohesion;GO:0007099 centriole replication;GO:0098534 centriole assembly		Predicted intracellular proteins					0.0	0.0	0.0	0.0	0.0	0.0	0.0	0.0	0.0	0.0	0.0	0.0	0.0	0.0	0.0	0.0	0.0	0.0	0.0	0.0
CDON	50937	symbol	H. sapiens	50937	H. sapiens	CDON	cell adhesion associated, oncogene regulated	GO:0045663 positive regulation of myoblast differentiation;GO:0045661 regulation of myoblast differentiation;GO:0007224 smoothened signaling pathway		Human disease related genes:Congenital malformations:Congenital malformations of the nervous system; Predicted intracellular proteins; Disease related genes			(M211)PID HEDGEHOG 2PATHWAY	(M5942)HALLMARK UV RESPONSE DN	0.0	0.0	0.0	0.0	0.0	0.0	0.0	0.0	0.0	0.0	0.0	0.0	0.0	0.0	0.0	0.0	0.0	0.0	0.0	0.0
LOC653602	151354	Gene_ID	H. sapiens	151354	H. sapiens	LRATD1	LRAT domain containing 1	GO:0000902 cell morphogenesis;GO:0048870 cell motility;GO:0051674 localization of cell		Predicted intracellular proteins	Nucleoplasm (Approved)				0.0	0.0	0.0	0.0	0.0	0.0	0.0	0.0	0.0	0.0	0.0	0.0	0.0	0.0	0.0	0.0	0.0	1.0	0.0	0.0
FAM149A	25854	symbol	H. sapiens	25854	H. sapiens	FAM149A	family with sequence similarity 149 member A			Predicted intracellular proteins	Golgi apparatus (Approved)				0.0	0.0	0.0	0.0	0.0	0.0	0.0	0.0	0.0	0.0	0.0	0.0	0.0	0.0	0.0	0.0	0.0	0.0	0.0	0.0
IL21-AS1	100996941	symbol	H. sapiens	100996941	H. sapiens	IL21-AS1	IL21 antisense RNA 1								0.0	0.0	0.0	0.0	0.0	0.0	0.0	0.0	0.0	0.0	0.0	0.0	0.0	0.0	0.0	0.0	0.0	0.0	0.0	0.0
C18orf65	400658	gene_synonym	H. sapiens	400658	H. sapiens	ZNF516-DT	ZNF516 divergent transcript								0.0	0.0	0.0	0.0	0.0	0.0	0.0	0.0	0.0	0.0	0.0	0.0	0.0	0.0	0.0	0.0	0.0	0.0	0.0	0.0
FAM49A	81553	gene_synonym	H. sapiens	81553	H. sapiens	CYRIA	CYFIP related Rac1 interactor A	GO:0030833 regulation of actin filament polymerization;GO:0008064 regulation of actin polymerization or depolymerization;GO:0030832 regulation of actin filament length		Predicted intracellular proteins	Nucleoplasm (Approved)				0.0	0.0	0.0	0.0	0.0	0.0	0.0	0.0	0.0	0.0	0.0	0.0	0.0	0.0	0.0	0.0	0.0	0.0	0.0	0.0
MTURN	222166	symbol	H. sapiens	222166	H. sapiens	MTURN	maturin, neural progenitor differentiation regulator homolog	GO:0045654 positive regulation of megakaryocyte differentiation;GO:0045652 regulation of megakaryocyte differentiation;GO:0032088 negative regulation of NF-kappaB transcription factor activity		Predicted intracellular proteins	Cytosol (Approved)				1.0	0.0	0.0	0.0	0.0	0.0	0.0	0.0	0.0	0.0	0.0	0.0	0.0	0.0	0.0	0.0	0.0	0.0	0.0	0.0
SFRP2	6423	symbol	H. sapiens	6423	H. sapiens	SFRP2	secreted frizzled related protein 2	GO:0061185 negative regulation of dermatome development;GO:2000040 regulation of planar cell polarity pathway involved in axis elongation;GO:2000041 negative regulation of planar cell polarity pathway involved in axis elongation		Predicted secreted proteins	Intermediate filaments (Approved)		(M5883)NABA SECRETED FACTORS; (M5885)NABA MATRISOME ASSOCIATED; (M5889)NABA MATRISOME		1.0	1.0	0.0	0.0	0.0	1.0	0.0	0.0	0.0	1.0	0.0	0.0	1.0	0.0	1.0	0.0	0.0	0.0	0.0	1.0
NUMB	8650	symbol	H. sapiens	8650	H. sapiens	NUMB	NUMB endocytic adaptor protein	GO:0021849 neuroblast division in subventricular zone;GO:0099149 regulation of postsynaptic neurotransmitter receptor internalization;GO:0021670 lateral ventricle development		Predicted intracellular proteins; Cancer-related genes:Candidate cancer biomarkers	Cell Junctions (Enhanced)		(M17)PID NOTCH PATHWAY; (M48)PID MET PATHWAY	(M5895)HALLMARK WNT BETA CATENIN SIGNALING	0.0	0.0	1.0	0.0	0.0	0.0	0.0	1.0	0.0	0.0	0.0	0.0	0.0	0.0	0.0	0.0	0.0	1.0	0.0	0.0
PDK4	5166	symbol	H. sapiens	5166	H. sapiens	PDK4	pyruvate dehydrogenase kinase 4	GO:0010510 regulation of acetyl-CoA biosynthetic process from pyruvate;GO:0050812 regulation of acyl-CoA biosynthetic process;GO:0042762 regulation of sulfur metabolic process	Atypical: PDK/BCKDK protein kinase family	Enzymes; Predicted intracellular proteins; Kinases:Atypical kinases; ENZYME proteins:Transferases		Tretinoin; 4-[4-(4-methoxyphenyl)-5-methyl-1H-pyrazol-3-yl]benzene-1,3-diol		(M5934)HALLMARK XENOBIOTIC METABOLISM; (M5936)HALLMARK OXIDATIVE PHOSPHORYLATION	0.0	0.0	0.0	1.0	0.0	0.0	0.0	0.0	0.0	0.0	0.0	1.0	1.0	0.0	0.0	0.0	0.0	0.0	0.0	0.0
BST2	684	symbol	H. sapiens	684	H. sapiens	BST2	bone marrow stromal cell antigen 2	GO:0002736 regulation of plasmacytoid dendritic cell cytokine production;GO:0002737 negative regulation of plasmacytoid dendritic cell cytokine production;GO:0002731 negative regulation of dendritic cell cytokine production		Transporters:Transporter channels and pores; CD markers	Golgi apparatus;Vesicles (Supported)			(M5911)HALLMARK INTERFERON ALPHA RESPONSE; (M5913)HALLMARK INTERFERON GAMMA RESPONSE; (M5932)HALLMARK INFLAMMATORY RESPONSE	0.0	0.0	0.0	0.0	0.0	0.0	0.0	1.0	0.0	0.0	0.0	0.0	0.0	1.0	0.0	0.0	1.0	0.0	0.0	0.0
PTPN22	26191	symbol	H. sapiens	26191	H. sapiens	PTPN22	protein tyrosine phosphatase non-receptor type 22	GO:0035644 phosphoanandamide dephosphorylation;GO:0071661 regulation of granzyme B production;GO:0071663 positive regulation of granzyme B production		Human disease related genes:Cardiovascular diseases:Vascular diseases; Human disease related genes:Immune system diseases:Other immune system diseases; Human disease related genes:Immune system diseases:Allergies and autoimmune diseases; ENZYME proteins:Hydrolases; Human disease related genes:Skin diseases:Skin and soft tissue diseases; Disease related genes; Potential drug targets; Enzymes; Huma…	Nucleoplasm (Uncertain); Additional: Plasma membrane;Vesicles				1.0	1.0	0.0	1.0	0.0	0.0	0.0	0.0	0.0	0.0	0.0	0.0	0.0	1.0	0.0	0.0	0.0	0.0	0.0	0.0
ACSS3	79611	symbol	H. sapiens	79611	H. sapiens	ACSS3	acyl-CoA synthetase short chain family member 3	GO:0046951 ketone body biosynthetic process;GO:0046950 cellular ketone body metabolic process;GO:1902224 ketone body metabolic process		Enzymes; ENZYME proteins:Ligase	Mitochondria (Supported)				0.0	0.0	0.0	0.0	0.0	0.0	0.0	0.0	1.0	0.0	0.0	0.0	0.0	0.0	0.0	0.0	0.0	0.0	0.0	0.0
PAM	5066	symbol	H. sapiens	5066	H. sapiens	PAM	peptidylglycine alpha-amidating monooxygenase	GO:0018032 protein amidation;GO:0062112 fatty acid primary amide biosynthetic process;GO:0062126 fatty acid primary amide metabolic process		ENZYME proteins:Oxidoreductases; Predicted secreted proteins; ENZYME proteins:Lyases; Enzymes; Predicted intracellular proteins	Cytosol;Golgi apparatus (Approved)	Ascorbic acid; N-Alpha-Acetyl-3,5-Diiodotyrosylglycine; N-alpha-Acetyl-3,5-diiodotyrosyl-D-threonine		(M5910)HALLMARK PROTEIN SECRETION; (M5891)HALLMARK HYPOXIA; (M5937)HALLMARK GLYCOLYSIS	0.0	0.0	0.0	1.0	0.0	0.0	0.0	0.0	1.0	1.0	0.0	0.0	0.0	0.0	0.0	1.0	0.0	0.0	1.0	0.0
FKBP1A	2280	symbol	H. sapiens	2280	H. sapiens	FKBP1A	FKBP prolyl isomerase 1A	GO:0007183 SMAD protein complex assembly;GO:0022417 protein maturation by protein folding;GO:0060347 heart trabecula formation		FDA approved drug targets:Small molecule drugs; Transporters:Accessory Factors Involved in Transport; Enzymes; ENZYME proteins:Isomerase; Predicted intracellular proteins		Pimecrolimus; Tacrolimus; Sirolimus; (3R)-4-(p-toluenesulfonyl)-1,4-thiazane-3-carboxylicacid-L-phenylalanine ethyl ester; {3-[3-(3,4-Dimethoxy-Phenyl)-1-(1-{1-[2-(3,4,5-Trimethoxy-Phenyl)-Butyryl]-Piperidin-2yl}-Vinyloxy)-Propyl]-Phenoxy}-Acetic Acid; Gpi-1046; Methyl Methylsulfinylmethyl Sulfide; FKB-001; Heptyl glucoside; L-709,587; (3r)-4-(P-Toluenesulfonyl)-1,4-Thiazane-3-Carboxylicacid-L-Le…	(M203)PID ALK2 PATHWAY; (M185)PID ALK1 PATHWAY; (M235)PID TCR CALCIUM PATHWAY	(M5896)HALLMARK TGF BETA SIGNALING	0.0	0.0	0.0	0.0	0.0	0.0	0.0	1.0	0.0	1.0	0.0	1.0	1.0	0.0	0.0	0.0	0.0	0.0	0.0	0.0
SORCS2	57537	symbol	H. sapiens	57537	H. sapiens	SORCS2	sortilin related VPS10 domain containing receptor 2	GO:0060292 long-term synaptic depression;GO:0050805 negative regulation of synaptic transmission;GO:0007218 neuropeptide signaling pathway			Cytosol;Vesicles (Approved)				0.0	0.0	0.0	0.0	0.0	0.0	0.0	0.0	0.0	0.0	0.0	0.0	0.0	0.0	0.0	0.0	0.0	0.0	0.0	0.0
TPK1	27010	symbol	H. sapiens	27010	H. sapiens	TPK1	thiamin pyrophosphokinase 1	GO:0009229 thiamine diphosphate biosynthetic process;GO:0042724 thiamine-containing compound biosynthetic process;GO:0042357 thiamine diphosphate metabolic process		FDA approved drug targets:Small molecule drugs; Disease related genes; Human disease related genes:Congenital disorders of metabolism:Congenital disorders of cofactor/vitamin metabolism; Enzymes; Predicted intracellular proteins; ENZYME proteins:Transferases	Vesicles (Approved)	Thiamine; Pyrithiamine Pyrophosphate			0.0	0.0	0.0	0.0	0.0	0.0	0.0	0.0	1.0	0.0	0.0	0.0	0.0	0.0	0.0	0.0	0.0	0.0	0.0	0.0
KCNJ6	3763	symbol	H. sapiens	3763	H. sapiens	KCNJ6	potassium inwardly rectifying channel subfamily J member 6	GO:1990573 potassium ion import across plasma membrane;GO:0098659 inorganic cation import across plasma membrane;GO:0099587 inorganic ion import across plasma membrane		Voltage-gated ion channels:Inwardly Rectifying Potassium Channels; Disease related genes; Potential drug targets; Transporters:Transporter channels and pores; Human disease related genes:Congenital disorders of metabolism:Other congenital disorders of metabolism		Ethanol; Halothane; Isavuconazole			0.0	0.0	0.0	0.0	0.0	0.0	1.0	0.0	0.0	0.0	0.0	0.0	0.0	0.0	0.0	0.0	0.0	0.0	0.0	0.0
MIR4697HG	22997	gene_synonym	H. sapiens	22997	H. sapiens	IGSF9B	immunoglobulin superfamily member 9B	GO:0007155 cell adhesion;GO:0022610 biological adhesion;GO:0007399 nervous system development		Predicted intracellular proteins	Cell Junctions;Golgi apparatus (Approved)				0.0	0.0	0.0	0.0	0.0	0.0	0.0	0.0	0.0	0.0	0.0	0.0	0.0	0.0	0.0	0.0	0.0	0.0	0.0	0.0
PRTFDC1	56952	symbol	H. sapiens	56952	H. sapiens	PRTFDC1	phosphoribosyl transferase domain containing 1	GO:0006166 purine ribonucleoside salvage;GO:0043174 nucleoside salvage;GO:0042451 purine nucleoside biosynthetic process		Predicted intracellular proteins	Nucleoplasm (Approved); Additional: Cytosol;Golgi apparatus				0.0	0.0	0.0	0.0	0.0	0.0	0.0	0.0	0.0	0.0	0.0	0.0	0.0	0.0	0.0	0.0	0.0	0.0	0.0	0.0
TDRD7	23424	symbol	H. sapiens	23424	H. sapiens	TDRD7	tudor domain containing 7	GO:0007314 oocyte anterior/posterior axis specification;GO:0007315 pole plasm assembly;GO:0008358 maternal determination of anterior/posterior axis, embryo		Human disease related genes:Nervous system diseases:Eye disease; Predicted intracellular proteins; Disease related genes	Cytoplasmic bodies (Supported); Additional: Nucleoplasm		(M242)PID AURORA A PATHWAY	(M5911)HALLMARK INTERFERON ALPHA RESPONSE; (M5913)HALLMARK INTERFERON GAMMA RESPONSE	0.0	0.0	0.0	0.0	0.0	0.0	0.0	0.0	0.0	0.0	0.0	0.0	0.0	0.0	0.0	0.0	0.0	0.0	0.0	0.0
CAMK2N1	55450	symbol	H. sapiens	55450	H. sapiens	CAMK2N1	calcium/calmodulin dependent protein kinase II inhibitor 1	GO:0007616 long-term memory;GO:0007613 memory;GO:0050729 positive regulation of inflammatory response		Predicted intracellular proteins					1.0	0.0	1.0	0.0	0.0	0.0	0.0	0.0	0.0	0.0	0.0	0.0	0.0	0.0	0.0	0.0	0.0	0.0	0.0	0.0
CLK1	1195	symbol	H. sapiens	1195	H. sapiens	CLK1	CDC like kinase 1	GO:0018107 peptidyl-threonine phosphorylation;GO:0018210 peptidyl-threonine modification;GO:0018108 peptidyl-tyrosine phosphorylation	CMGC Ser/Thr protein kinase family	Enzymes; Kinases:CMGC Ser/Thr protein kinases; Predicted intracellular proteins; ENZYME proteins:Transferases	Nuclear membrane;Nucleoplasm (Supported)	Debromohymenialdisine; CHGN111; ethyl 3-[(E)-2-amino-1-cyanoethenyl]-6,7-dichloro-1-methyl-1H-indole-2-carboxylate; Fostamatinib			0.0	0.0	0.0	0.0	0.0	0.0	0.0	1.0	0.0	0.0	0.0	0.0	0.0	0.0	0.0	0.0	0.0	0.0	0.0	0.0
LRRC15	131578	symbol	H. sapiens	131578	H. sapiens	LRRC15	leucine rich repeat containing 15	GO:0046813 receptor-mediated virion attachment to host cell;GO:0019062 virion attachment to host cell;GO:0044650 adhesion of symbiont to host cell		Transporters:Accessory Factors Involved in Transport	Vesicles (Approved); Additional: Plasma membrane			(M5930)HALLMARK EPITHELIAL MESENCHYMAL TRANSITION	0.0	0.0	1.0	0.0	0.0	0.0	0.0	0.0	0.0	0.0	0.0	0.0	0.0	0.0	0.0	0.0	0.0	0.0	0.0	0.0
PDGFD	80310	symbol	H. sapiens	80310	H. sapiens	PDGFD	platelet derived growth factor D	GO:0071673 positive regulation of smooth muscle cell chemotaxis;GO:2000439 positive regulation of monocyte extravasation;GO:2000437 regulation of monocyte extravasation		RAS pathway related proteins; Predicted secreted proteins; Predicted intracellular proteins	Golgi apparatus;Vesicles (Approved)	CR002; Tandutinib	(M174)PID UPA UPAR PATHWAY; (M5883)NABA SECRETED FACTORS; (M5885)NABA MATRISOME ASSOCIATED		1.0	0.0	1.0	0.0	0.0	1.0	0.0	1.0	0.0	0.0	1.0	0.0	1.0	0.0	0.0	1.0	0.0	0.0	0.0	1.0
FBLN5	10516	symbol	H. sapiens	10516	H. sapiens	FBLN5	fibulin 5	GO:2000121 regulation of removal of superoxide radicals;GO:0048251 elastic fiber assembly;GO:0034394 protein localization to cell surface		Human disease related genes:Congenital malformations:Congenital malformations of skin; Human disease related genes:Nervous system diseases:Eye disease; Predicted secreted proteins; Disease related genes	Plasma membrane (Uncertain)		(M3008)NABA ECM GLYCOPROTEINS; (M5884)NABA CORE MATRISOME; (M5889)NABA MATRISOME	(M5942)HALLMARK UV RESPONSE DN; (M5930)HALLMARK EPITHELIAL MESENCHYMAL TRANSITION	0.0	0.0	0.0	0.0	0.0	1.0	0.0	0.0	0.0	0.0	0.0	0.0	0.0	0.0	0.0	0.0	0.0	0.0	0.0	0.0
PTGS1	5742	symbol	H. sapiens	5742	H. sapiens	PTGS1	prostaglandin-endoperoxide synthase 1	GO:0019371 cyclooxygenase pathway;GO:0001516 prostaglandin biosynthetic process;GO:0046457 prostanoid biosynthetic process		FDA approved drug targets:Small molecule drugs; ENZYME proteins:Oxidoreductases; Cancer-related genes:Candidate cancer biomarkers; Enzymes; Predicted intracellular proteins	Golgi apparatus (Supported); Additional: Vesicles	Dihomo-gamma-linolenic acid; Icosapent; Mesalazine; Acetaminophen; Indomethacin; Minoxidil; Nabumetone; Ketorolac; Tenoxicam; Tolmetin; Piroxicam; Fenoprofen; Diclofenac; Sulindac; Diethylcarbamazine; Flurbiprofen; Etodolac; Mefenamic acid; Naproxen; Sulfasalazine; Phenylbutazone; Meloxicam; Carprofen; Diflunisal; Suprofen; Salicylic acid; Meclofenamic acid; Acetylsalicylic acid; Bromfenac; Oxapr…			0.0	0.0	0.0	0.0	0.0	0.0	0.0	0.0	1.0	0.0	0.0	0.0	0.0	0.0	0.0	1.0	0.0	0.0	0.0	0.0
LAMA4	3910	symbol	H. sapiens	3910	H. sapiens	LAMA4	laminin subunit alpha 4	GO:0120163 negative regulation of cold-induced thermogenesis;GO:0045995 regulation of embryonic development;GO:0120161 regulation of cold-induced thermogenesis		Predicted intracellular proteins; Predicted secreted proteins; Human disease related genes:Cardiovascular diseases:Cardiac diseases; Disease related genes	Cytosol;Plasma membrane (Approved)		(M5887)NABA BASEMENT MEMBRANES; (M176)PID FOXM1 PATHWAY; (M53)PID INTEGRIN3 PATHWAY	(M5905)HALLMARK ADIPOGENESIS	0.0	1.0	0.0	0.0	0.0	1.0	0.0	1.0	0.0	0.0	0.0	0.0	1.0	0.0	0.0	0.0	0.0	0.0	0.0	0.0
PITPNA	5306	symbol	H. sapiens	5306	H. sapiens	PITPNA	phosphatidylinositol transfer protein alpha	GO:0120009 intermembrane lipid transfer;GO:0015914 phospholipid transport;GO:0015748 organophosphate ester transport		Predicted intracellular proteins	Cytosol (Approved); Additional: Vesicles	1,2-diacyl-sn-glycero-3-phosphoinositol; (Z,Z)-4-Hydroxy-N,N,N-Trimethyl-10-Oxo-7-[(1-Oxo-9-Octadecenyl)Oxy]-3,5,9-Trioxa-4-Phosphaheptacos-18-En-1-Aminium-4-Oxide	(M108)PID NETRIN PATHWAY		0.0	0.0	0.0	0.0	0.0	0.0	0.0	1.0	0.0	0.0	0.0	0.0	0.0	0.0	0.0	0.0	1.0	1.0	0.0	0.0
COLGALT2	23127	symbol	H. sapiens	23127	H. sapiens	COLGALT2	collagen beta(1-O)galactosyltransferase 2	GO:0030199 collagen fibril organization;GO:0030198 extracellular matrix organization;GO:0043062 extracellular structure organization		Enzymes; Predicted intracellular proteins; ENZYME proteins:Transferases	Nucleoplasm (Approved); Additional: Vesicles				0.0	0.0	0.0	0.0	0.0	1.0	0.0	0.0	0.0	0.0	0.0	0.0	0.0	0.0	0.0	0.0	0.0	0.0	0.0	0.0
PLIN2	123	symbol	H. sapiens	123	H. sapiens	PLIN2	perilipin 2	GO:0010890 positive regulation of sequestering of triglyceride;GO:0010889 regulation of sequestering of triglyceride;GO:0010884 positive regulation of lipid storage		Predicted intracellular proteins	Lipid droplets (Supported)		(M255)PID HIF1 TFPATHWAY	(M5947)HALLMARK IL2 STAT5 SIGNALING; (M5891)HALLMARK HYPOXIA; (M5905)HALLMARK ADIPOGENESIS	0.0	0.0	0.0	0.0	0.0	0.0	0.0	0.0	1.0	0.0	0.0	0.0	0.0	0.0	0.0	0.0	0.0	0.0	0.0	0.0
PXYLP1	92370	symbol	H. sapiens	92370	H. sapiens	PXYLP1	2-phosphoxylose phosphatase 1	GO:0010909 positive regulation of heparan sulfate proteoglycan biosynthetic process;GO:0010908 regulation of heparan sulfate proteoglycan biosynthetic process;GO:1902730 positive regulation of proteoglycan biosynthetic process		Predicted intracellular proteins					0.0	0.0	0.0	0.0	0.0	0.0	0.0	0.0	0.0	0.0	0.0	0.0	0.0	0.0	0.0	0.0	0.0	0.0	0.0	0.0
STXBP5-AS1	729178	symbol	H. sapiens	729178	H. sapiens	STXBP5-AS1	STXBP5 antisense RNA 1								0.0	0.0	0.0	0.0	0.0	0.0	0.0	0.0	0.0	0.0	0.0	0.0	0.0	0.0	0.0	0.0	0.0	0.0	0.0	0.0
UHRF1BP1L	23074	symbol	H. sapiens	23074	H. sapiens	UHRF1BP1L	UHRF1 binding protein 1 like			Predicted intracellular proteins; Cancer-related genes:Mutational cancer driver genes	Nucleoplasm (Uncertain); Additional: Cytosol;Vesicles				0.0	0.0	0.0	0.0	0.0	0.0	0.0	0.0	0.0	0.0	0.0	0.0	0.0	0.0	0.0	0.0	0.0	0.0	0.0	0.0
SLCO3A1	28232	symbol	H. sapiens	28232	H. sapiens	SLCO3A1	solute carrier organic anion transporter family member 3A1	GO:0015732 prostaglandin transport;GO:0043252 sodium-independent organic anion transport;GO:0071715 icosanoid transport		Transporters:Electrochemical Potential-driven transporters					1.0	0.0	0.0	0.0	1.0	0.0	0.0	0.0	0.0	0.0	0.0	0.0	0.0	0.0	0.0	0.0	0.0	0.0	0.0	0.0
KIF3B	9371	symbol	H. sapiens	9371	H. sapiens	KIF3B	kinesin family member 3B	GO:0036372 opsin transport;GO:0098971 anterograde dendritic transport of neurotransmitter receptor complex;GO:0072383 plus-end-directed vesicle transport along microtubule		Human disease related genes:Nervous system diseases:Eye disease; Predicted intracellular proteins				(M5893)HALLMARK MITOTIC SPINDLE	0.0	0.0	0.0	0.0	0.0	1.0	0.0	0.0	0.0	0.0	0.0	0.0	1.0	0.0	0.0	0.0	0.0	0.0	1.0	0.0
FAM13B	51306	symbol	H. sapiens	51306	H. sapiens	FAM13B	family with sequence similarity 13 member B	GO:0051056 regulation of small GTPase mediated signal transduction;GO:1902531 regulation of intracellular signal transduction;GO:0050790 regulation of catalytic activity		Predicted intracellular proteins	Nucleoplasm (Approved)				0.0	0.0	0.0	0.0	0.0	0.0	0.0	0.0	0.0	0.0	0.0	0.0	0.0	0.0	0.0	0.0	0.0	0.0	0.0	0.0
HTR2A	3356	symbol	H. sapiens	3356	H. sapiens	HTR2A	5-hydroxytryptamine receptor 2A	GO:0007208 phospholipase C-activating serotonin receptor signaling pathway;GO:0010513 positive regulation of phosphatidylinositol biosynthetic process;GO:0010511 regulation of phosphatidylinositol biosynthetic process		G-protein coupled receptors:GPCRs excl olfactory receptors; G-protein coupled receptors:Serotonin receptors; FDA approved drug targets:Small molecule drugs; Human disease related genes:Other diseases:Mental and behavioural disorders		Ziprasidone; Methysergide; Cabergoline; Zolmitriptan; Amitriptyline; Olanzapine; Clozapine; Mirtazapine; Loxapine; Remoxipride; Promazine; Cyproheptadine; Imipramine; Chlorpromazine; Haloperidol; Nortriptyline; Amoxapine; Lamotrigine; Fenfluramine; Lisuride; Cisapride; Fluphenazine; Trazodone; Thioridazine; Ergotamine; Apomorphine; Paroxetine; Trimipramine; Risperidone; Epinastine; Propiomazine; …			1.0	0.0	0.0	1.0	0.0	0.0	0.0	1.0	0.0	0.0	0.0	1.0	0.0	0.0	0.0	0.0	0.0	0.0	0.0	0.0
SGCG	6445	symbol	H. sapiens	6445	H. sapiens	SGCG	sarcoglycan gamma	GO:0060047 heart contraction;GO:0003015 heart process;GO:0048738 cardiac muscle tissue development		Human disease related genes:Musculoskeletal diseases:Muscular diseases; Disease related genes				(M5909)HALLMARK MYOGENESIS; (M5930)HALLMARK EPITHELIAL MESENCHYMAL TRANSITION	0.0	0.0	0.0	0.0	0.0	0.0	0.0	0.0	0.0	1.0	0.0	0.0	0.0	0.0	0.0	0.0	0.0	0.0	0.0	0.0
CDADC1	81602	symbol	H. sapiens	81602	H. sapiens	CDADC1	cytidine and dCMP deaminase domain containing 1	GO:0070383 DNA cytosine deamination;GO:0006216 cytidine catabolic process;GO:0009972 cytidine deamination		Enzymes; ENZYME proteins:Hydrolases; Predicted intracellular proteins	Nucleoplasm (Approved)			(M5953)HALLMARK KRAS SIGNALING UP	0.0	0.0	0.0	0.0	0.0	0.0	0.0	0.0	0.0	0.0	0.0	0.0	0.0	0.0	0.0	0.0	0.0	0.0	0.0	0.0
SEC22C	9117	symbol	H. sapiens	9117	H. sapiens	SEC22C	SEC22 homolog C, vesicle trafficking protein	GO:0006888 endoplasmic reticulum to Golgi vesicle-mediated transport;GO:0048193 Golgi vesicle transport;GO:0015031 protein transport		Predicted intracellular proteins	Golgi apparatus (Approved); Additional: Nucleoplasm				0.0	0.0	0.0	0.0	0.0	0.0	0.0	0.0	0.0	0.0	0.0	0.0	0.0	0.0	0.0	0.0	0.0	0.0	0.0	0.0
SOD3	6649	symbol	H. sapiens	6649	H. sapiens	SOD3	superoxide dismutase 3	GO:0019430 removal of superoxide radicals;GO:0071450 cellular response to oxygen radical;GO:0071451 cellular response to superoxide		Enzymes; Predicted secreted proteins; ENZYME proteins:Oxidoreductases				(M5909)HALLMARK MYOGENESIS	0.0	0.0	0.0	0.0	0.0	0.0	1.0	0.0	0.0	0.0	0.0	0.0	0.0	0.0	0.0	0.0	0.0	0.0	0.0	0.0
RMDN1	51115	symbol	H. sapiens	51115	H. sapiens	RMDN1	regulator of microtubule dynamics 1	GO:0051315 attachment of mitotic spindle microtubules to kinetochore;GO:0008608 attachment of spindle microtubules to kinetochore;GO:0007080 mitotic metaphase plate congression		Predicted intracellular proteins	Centrosome (Supported); Additional: Actin filaments				0.0	0.0	0.0	0.0	0.0	0.0	0.0	0.0	0.0	0.0	0.0	0.0	0.0	0.0	0.0	0.0	0.0	0.0	0.0	0.0
RRAGC	64121	symbol	H. sapiens	64121	H. sapiens	RRAGC	Ras related GTP binding C	GO:1903432 regulation of TORC1 signaling;GO:0034198 cellular response to amino acid starvation;GO:0032008 positive regulation of TOR signaling		Predicted intracellular proteins; Disease related genes	Nucleoplasm;Vesicles (Supported)		(M121)PID MTOR 4PATHWAY		0.0	0.0	0.0	0.0	0.0	0.0	0.0	1.0	0.0	0.0	0.0	0.0	1.0	0.0	0.0	0.0	0.0	0.0	0.0	0.0
KCNA4	3739	symbol	H. sapiens	3739	H. sapiens	KCNA4	potassium voltage-gated channel subfamily A member 4	GO:0071805 potassium ion transmembrane transport;GO:0006813 potassium ion transport;GO:0051260 protein homooligomerization		FDA approved drug targets:Small molecule drugs; Human disease related genes:Congenital malformations:Congenital malformations of the nervous system; Voltage-gated ion channels:Voltage-Gated Potassium Channels; Disease related genes; Transporters:Transporter channels and pores		Arginineamide; Dalfampridine			0.0	0.0	0.0	0.0	0.0	0.0	0.0	0.0	0.0	0.0	0.0	0.0	0.0	0.0	0.0	0.0	0.0	0.0	0.0	0.0
MTDH	92140	symbol	H. sapiens	92140	H. sapiens	MTDH	metadherin	GO:0031663 lipopolysaccharide-mediated signaling pathway;GO:0051897 positive regulation of protein kinase B signaling;GO:0010508 positive regulation of autophagy		Predicted intracellular proteins	Endoplasmic reticulum (Enhanced)		(M66)PID MYC ACTIV PATHWAY		0.0	0.0	0.0	1.0	0.0	0.0	0.0	0.0	0.0	0.0	0.0	0.0	0.0	0.0	0.0	0.0	0.0	0.0	0.0	0.0
SMOC2	64094	symbol	H. sapiens	64094	H. sapiens	SMOC2	SPARC related modular calcium binding 2	GO:0035470 positive regulation of vascular wound healing;GO:1900748 positive regulation of vascular endothelial growth factor signaling pathway;GO:0045743 positive regulation of fibroblast growth factor receptor signaling pathway		Predicted secreted proteins; Human disease related genes:Digestive system diseases:Mouth and dental diseases; Predicted intracellular proteins; Disease related genes			(M3008)NABA ECM GLYCOPROTEINS; (M5884)NABA CORE MATRISOME; (M5889)NABA MATRISOME		0.0	0.0	1.0	0.0	0.0	1.0	0.0	0.0	0.0	0.0	0.0	0.0	0.0	0.0	0.0	0.0	0.0	0.0	0.0	0.0
THRB	7068	symbol	H. sapiens	7068	H. sapiens	THRB	thyroid hormone receptor beta	GO:0097474 retinal cone cell apoptotic process;GO:0002157 positive regulation of thyroid hormone mediated signaling pathway;GO:0008050 female courtship behavior		FDA approved drug targets:Small molecule drugs; Cancer-related genes:Candidate cancer biomarkers; Human disease related genes:Endocrine and metabolic diseases:Thyroid gland diseases; Transcription factors:Zinc-coordinating DNA-binding domains; Disease related genes; Nuclear receptors; Predicted intracellular proteins	Nuclear bodies (Supported)	Liothyronine; Levothyroxine; Dextrothyroxine; Liotrix; [3,5-Dibromo-4-(4-Hydroxy-3-Phenethylcarbamoyl-Phenoxy)-Phenyl]-Acetic Acid; KB-141; 2-[4-(4-Hydroxy-3-Isopropyl-Phenoxy)-3,5-Dimethyl-Phenyl]-2h-[1,2,4]Triazine-3,5-Dione; Tiratricol; GC-24; Eprotirome; MB07811; Sobetirome; 1-(4-HEXYLPHENYL)PROP-2-EN-1-ONE; Thyroid, porcine	(M162)PID RXR VDR PATHWAY	(M5956)HALLMARK KRAS SIGNALING DN	0.0	0.0	0.0	1.0	0.0	1.0	0.0	1.0	0.0	0.0	0.0	1.0	0.0	0.0	0.0	0.0	0.0	0.0	0.0	0.0
ANK2	287	symbol	H. sapiens	287	H. sapiens	ANK2	ankyrin 2	GO:0036309 protein localization to M-band;GO:0036371 protein localization to T-tubule;GO:0098907 regulation of SA node cell action potential		Transporters:Accessory Factors Involved in Transport; Human disease related genes:Cardiovascular diseases:Cardiac diseases; Disease related genes; Potential drug targets; Predicted intracellular proteins	Plasma membrane (Supported)				0.0	0.0	0.0	0.0	0.0	0.0	0.0	0.0	0.0	1.0	0.0	1.0	0.0	0.0	0.0	0.0	0.0	1.0	0.0	0.0
GSAP	54103	symbol	H. sapiens	54103	H. sapiens	GSAP	gamma-secretase activating protein	GO:1902004 positive regulation of amyloid-beta formation;GO:1902993 positive regulation of amyloid precursor protein catabolic process;GO:1902003 regulation of amyloid-beta formation		Predicted intracellular proteins	Vesicles (Approved)				0.0	0.0	0.0	0.0	0.0	0.0	0.0	0.0	0.0	0.0	0.0	0.0	0.0	0.0	0.0	0.0	0.0	0.0	0.0	0.0
MOCOS	55034	symbol	H. sapiens	55034	H. sapiens	MOCOS	molybdenum cofactor sulfurase	GO:0032324 molybdopterin cofactor biosynthetic process;GO:0006777 Mo-molybdopterin cofactor biosynthetic process;GO:0019720 Mo-molybdopterin cofactor metabolic process		Human disease related genes:Congenital disorders of metabolism:Congenital disorders of nucleotide metabolism; Disease related genes; Potential drug targets; Enzymes; Predicted intracellular proteins; ENZYME proteins:Transferases	Mitochondria (Supported); Additional: Cytosol	Pyridoxal phosphate		(M5945)HALLMARK HEME METABOLISM	0.0	0.0	0.0	0.0	0.0	0.0	0.0	0.0	0.0	0.0	0.0	0.0	0.0	0.0	0.0	0.0	0.0	0.0	0.0	0.0
CNTN3	5067	symbol	H. sapiens	5067	H. sapiens	CNTN3	contactin 3	GO:0007155 cell adhesion;GO:0022610 biological adhesion;GO:0009987 cellular process		Predicted intracellular proteins					0.0	0.0	0.0	0.0	0.0	0.0	0.0	0.0	0.0	0.0	0.0	0.0	0.0	0.0	0.0	0.0	0.0	0.0	0.0	0.0
ZCCHC14	23174	symbol	H. sapiens	23174	H. sapiens	ZCCHC14	zinc finger CCHC-type containing 14			Predicted intracellular proteins	Nuclear membrane (Uncertain)				0.0	0.0	0.0	0.0	0.0	0.0	0.0	0.0	0.0	0.0	0.0	0.0	0.0	0.0	0.0	0.0	0.0	0.0	0.0	0.0
SLC26A2	1836	symbol	H. sapiens	1836	H. sapiens	SLC26A2	solute carrier family 26 member 2	GO:0034036 purine ribonucleoside bisphosphate biosynthetic process;GO:0050428 3'-phosphoadenosine 5'-phosphosulfate biosynthetic process;GO:0019532 oxalate transport		Human disease related genes:Congenital malformations:Congenital malformations of the musculoskeletal system; Disease related genes; Potential drug targets; Transporters:Electrochemical Potential-driven transporters; Predicted intracellular proteins	Vesicles (Approved)			(M5908)HALLMARK ANDROGEN RESPONSE; (M5906)HALLMARK ESTROGEN RESPONSE EARLY; (M5907)HALLMARK ESTROGEN RESPONSE LATE	0.0	0.0	0.0	0.0	1.0	0.0	0.0	0.0	0.0	0.0	0.0	0.0	0.0	0.0	0.0	0.0	0.0	0.0	0.0	0.0
COL6A6	131873	symbol	H. sapiens	131873	H. sapiens	COL6A6	collagen type VI alpha 6 chain	GO:0030198 extracellular matrix organization;GO:0043062 extracellular structure organization;GO:0045229 external encapsulating structure organization		Predicted secreted proteins; Predicted intracellular proteins			(M5887)NABA BASEMENT MEMBRANES; (M3005)NABA COLLAGENS; (M5884)NABA CORE MATRISOME		0.0	0.0	0.0	0.0	0.0	1.0	0.0	1.0	0.0	0.0	0.0	0.0	1.0	0.0	0.0	0.0	0.0	1.0	0.0	0.0
SPATA18	132671	symbol	H. sapiens	132671	H. sapiens	SPATA18	spermatogenesis associated 18	GO:0035695 mitophagy by induced vacuole formation;GO:0035694 mitochondrial protein catabolic process;GO:0000422 autophagy of mitochondrion		Predicted intracellular proteins	Mitochondria (Supported)		(M256)PID TAP63 PATHWAY		0.0	0.0	0.0	0.0	0.0	0.0	0.0	0.0	0.0	0.0	0.0	0.0	0.0	0.0	0.0	0.0	0.0	0.0	0.0	0.0
SIAE	54414	symbol	H. sapiens	54414	H. sapiens	SIAE	sialic acid acetylesterase	GO:0005975 carbohydrate metabolic process;GO:0002682 regulation of immune system process;GO:0044238 primary metabolic process		ENZYME proteins:Hydrolases; Disease related genes; Potential drug targets; Enzymes; Predicted intracellular proteins					0.0	0.0	0.0	0.0	0.0	0.0	0.0	0.0	0.0	0.0	0.0	0.0	0.0	0.0	0.0	0.0	0.0	0.0	0.0	0.0
LVCAT1	100506827	gene_synonym	H. sapiens	100506827	H. sapiens	LINC02475	long intergenic non-protein coding RNA 2475								0.0	0.0	0.0	0.0	0.0	0.0	0.0	0.0	0.0	0.0	0.0	0.0	0.0	0.0	0.0	0.0	0.0	0.0	0.0	0.0
SEMA4D	10507	symbol	H. sapiens	10507	H. sapiens	SEMA4D	semaphorin 4D	GO:1900220 semaphorin-plexin signaling pathway involved in bone trabecula morphogenesis;GO:1905704 positive regulation of inhibitory synapse assembly;GO:0010693 negative regulation of alkaline phosphatase activity		Predicted intracellular proteins; CD markers			(M5880)NABA ECM AFFILIATED; (M5885)NABA MATRISOME ASSOCIATED; (M5889)NABA MATRISOME	(M5932)HALLMARK INFLAMMATORY RESPONSE	1.0	1.0	1.0	0.0	0.0	1.0	0.0	0.0	0.0	0.0	0.0	0.0	0.0	1.0	0.0	0.0	0.0	1.0	0.0	0.0
CTAGE7P	119437	symbol	H. sapiens	119437	H. sapiens	CTAGE7P	CTAGE family member 7, pseudogene								0.0	0.0	0.0	0.0	0.0	0.0	0.0	0.0	0.0	0.0	0.0	0.0	0.0	0.0	0.0	0.0	0.0	0.0	0.0	0.0
NR3C1	2908	symbol	H. sapiens	2908	H. sapiens	NR3C1	nuclear receptor subfamily 3 group C member 1	GO:0043402 glucocorticoid mediated signaling pathway;GO:0042921 glucocorticoid receptor signaling pathway;GO:0031958 corticosteroid receptor signaling pathway		FDA approved drug targets:Small molecule drugs; Transcription factors:Zinc-coordinating DNA-binding domains; Human disease related genes:Musculoskeletal diseases:Skeletal diseases; Human disease related genes:Endocrine and metabolic diseases:Adrenal gland diseases; Disease related genes; Nuclear receptors; Predicted intracellular proteins	Cytosol;Nucleoplasm (Supported); Additional: Mitochondria	Flunisolide; Diflorasone; Alclometasone; Medrysone; Amcinonide; Fluorometholone; Megestrol acetate; Levonorgestrel; Beclomethasone dipropionate; Progesterone; Spironolactone; Betamethasone; Desoximetasone; Fluticasone propionate; Fluocinolone acetonide; Ulobetasol; Triamcinolone; Prednisone; Flumethasone; Fludrocortisone; Norethisterone; Hydrocortisone; Mometasone; Hydrocortamate; Mifepristone; C…	(M30)PID HDAC CLASSII PATHWAY; (M106)PID HNF3B PATHWAY; (M151)PID AR TF PATHWAY	(M5942)HALLMARK UV RESPONSE DN; (M5891)HALLMARK HYPOXIA; (M5945)HALLMARK HEME METABOLISM	0.0	0.0	0.0	1.0	0.0	0.0	0.0	1.0	0.0	0.0	1.0	0.0	0.0	0.0	0.0	1.0	0.0	0.0	0.0	0.0
CLEC2A	387836	symbol	H. sapiens	387836	H. sapiens	CLEC2A	C-type lectin domain family 2 member A	GO:0042267 natural killer cell mediated cytotoxicity;GO:0002228 natural killer cell mediated immunity;GO:0001909 leukocyte mediated cytotoxicity			Plasma membrane (Uncertain)		(M5880)NABA ECM AFFILIATED; (M5885)NABA MATRISOME ASSOCIATED; (M5889)NABA MATRISOME		0.0	0.0	0.0	0.0	0.0	1.0	0.0	0.0	0.0	0.0	0.0	0.0	0.0	0.0	0.0	0.0	0.0	0.0	0.0	0.0
PIK3IP1	113791	symbol	H. sapiens	113791	H. sapiens	PIK3IP1	phosphoinositide-3-kinase interacting protein 1	GO:0043553 negative regulation of phosphatidylinositol 3-kinase activity;GO:0090219 negative regulation of lipid kinase activity;GO:0014067 negative regulation of phosphatidylinositol 3-kinase signaling		Predicted intracellular proteins			(M5883)NABA SECRETED FACTORS; (M5885)NABA MATRISOME ASSOCIATED; (M5889)NABA MATRISOME		1.0	0.0	0.0	0.0	0.0	1.0	0.0	0.0	0.0	0.0	0.0	0.0	1.0	0.0	0.0	0.0	0.0	0.0	0.0	0.0
NCALD	83988	symbol	H. sapiens	83988	H. sapiens	NCALD	neurocalcin delta	GO:0003073 regulation of systemic arterial blood pressure;GO:0019722 calcium-mediated signaling;GO:0008217 regulation of blood pressure		Predicted intracellular proteins					0.0	0.0	0.0	0.0	0.0	0.0	0.0	0.0	0.0	0.0	0.0	0.0	0.0	0.0	0.0	0.0	0.0	0.0	0.0	0.0
RAB31	11031	symbol	H. sapiens	11031	H. sapiens	RAB31	RAB31, member RAS oncogene family	GO:0060100 positive regulation of phagocytosis, engulfment;GO:1905155 positive regulation of membrane invagination;GO:0060099 regulation of phagocytosis, engulfment		Predicted intracellular proteins				(M5896)HALLMARK TGF BETA SIGNALING; (M5906)HALLMARK ESTROGEN RESPONSE EARLY; (M5907)HALLMARK ESTROGEN RESPONSE LATE	0.0	0.0	0.0	1.0	0.0	0.0	0.0	0.0	0.0	0.0	0.0	0.0	0.0	0.0	0.0	0.0	0.0	0.0	0.0	0.0
XPNPEP2	7512	symbol	H. sapiens	7512	H. sapiens	XPNPEP2	X-prolyl aminopeptidase 2	GO:0006508 proteolysis;GO:0019538 protein metabolic process;GO:1901564 organonitrogen compound metabolic process		ENZYME proteins:Hydrolases; Peptidases:Metallopeptidases; Disease related genes; Potential drug targets; Enzymes; Predicted intracellular proteins	Cytosol;Plasma membrane (Approved)				0.0	0.0	0.0	0.0	0.0	0.0	0.0	0.0	0.0	0.0	0.0	0.0	0.0	0.0	0.0	0.0	0.0	0.0	0.0	0.0
BCL6B	255877	symbol	H. sapiens	255877	H. sapiens	BCL6B	BCL6B transcription repressor	GO:0042092 type 2 immune response;GO:0050727 regulation of inflammatory response;GO:0031347 regulation of defense response		Predicted intracellular proteins; Transcription factors:Zinc-coordinating DNA-binding domains	Nucleoplasm (Approved); Additional: Plasma membrane;Vesicles				0.0	0.0	0.0	0.0	0.0	0.0	0.0	0.0	0.0	0.0	0.0	0.0	0.0	0.0	0.0	0.0	0.0	0.0	0.0	0.0
ZNF41	7592	symbol	H. sapiens	7592	H. sapiens	ZNF41	zinc finger protein 41	GO:0006357 regulation of transcription by RNA polymerase II;GO:0006355 regulation of transcription, DNA-templated;GO:1903506 regulation of nucleic acid-templated transcription		Transcription factors:Zinc-coordinating DNA-binding domains; Predicted intracellular proteins; Disease related genes	Nucleoplasm (Approved)				0.0	0.0	0.0	0.0	0.0	0.0	0.0	0.0	0.0	0.0	0.0	0.0	0.0	0.0	0.0	0.0	0.0	0.0	0.0	0.0
BCAP29	55973	symbol	H. sapiens	55973	H. sapiens	BCAP29	B cell receptor associated protein 29	GO:0070973 protein localization to endoplasmic reticulum exit site;GO:0070972 protein localization to endoplasmic reticulum;GO:0006888 endoplasmic reticulum to Golgi vesicle-mediated transport		Transporters:Primary Active Transporters; Predicted intracellular proteins	Cytosol (Approved)				0.0	0.0	0.0	0.0	0.0	0.0	0.0	0.0	0.0	0.0	0.0	0.0	0.0	0.0	0.0	0.0	0.0	0.0	0.0	0.0
FLRT2	23768	symbol	H. sapiens	23768	H. sapiens	FLRT2	fibronectin leucine rich transmembrane protein 2	GO:0061343 cell adhesion involved in heart morphogenesis;GO:0071711 basement membrane organization;GO:2001222 regulation of neuron migration							0.0	0.0	0.0	0.0	0.0	1.0	0.0	0.0	0.0	1.0	1.0	0.0	1.0	0.0	0.0	0.0	0.0	1.0	0.0	0.0
IL20RB	53833	symbol	H. sapiens	53833	H. sapiens	IL20RB	interleukin 20 receptor subunit beta	GO:0001808 negative regulation of type IV hypersensitivity;GO:0002884 negative regulation of hypersensitivity;GO:0001807 regulation of type IV hypersensitivity			Vesicles (Approved); Additional: Cytosol				0.0	1.0	0.0	0.0	0.0	0.0	0.0	0.0	0.0	0.0	0.0	0.0	0.0	1.0	0.0	0.0	1.0	0.0	0.0	0.0
RALA	5898	symbol	H. sapiens	5898	H. sapiens	RALA	RAS like proto-oncogene A	GO:0051665 membrane raft localization;GO:0090141 positive regulation of mitochondrial fission;GO:0051491 positive regulation of filopodium assembly		Enzymes; ENZYME proteins:Hydrolases; RAS pathway related proteins; Predicted intracellular proteins	Plasma membrane (Supported); Additional: Focal adhesion sites	Guanosine-5'-Diphosphate	(M76)PID P38 ALPHA BETA PATHWAY; (M67)PID ARF6 TRAFFICKING PATHWAY; (M136)PID FOXO PATHWAY	(M5898)HALLMARK DNA REPAIR	0.0	0.0	0.0	0.0	0.0	0.0	0.0	1.0	0.0	1.0	0.0	0.0	1.0	0.0	0.0	1.0	1.0	1.0	0.0	0.0
CCL28	56477	symbol	H. sapiens	56477	H. sapiens	CCL28	C-C motif chemokine ligand 28	GO:1903237 negative regulation of leukocyte tethering or rolling;GO:0002692 negative regulation of cellular extravasation;GO:1904995 negative regulation of leukocyte adhesion to vascular endothelial cell		Predicted secreted proteins; Predicted intracellular proteins			(M5883)NABA SECRETED FACTORS; (M5885)NABA MATRISOME ASSOCIATED; (M5889)NABA MATRISOME		0.0	1.0	0.0	0.0	0.0	1.0	0.0	0.0	0.0	0.0	0.0	1.0	1.0	1.0	0.0	0.0	1.0	1.0	0.0	1.0
CLEC12A	160364	symbol	H. sapiens	160364	H. sapiens	CLEC12A	C-type lectin domain family 12 member A			Predicted intracellular proteins; CD markers			(M5880)NABA ECM AFFILIATED; (M5885)NABA MATRISOME ASSOCIATED; (M5889)NABA MATRISOME		0.0	0.0	0.0	0.0	0.0	1.0	0.0	0.0	0.0	0.0	0.0	0.0	0.0	0.0	0.0	0.0	0.0	0.0	0.0	0.0
LINC00673	100499467	symbol	H. sapiens	100499467	H. sapiens	LINC00673	long intergenic non-protein coding RNA 673								0.0	0.0	0.0	0.0	0.0	0.0	0.0	0.0	0.0	0.0	0.0	0.0	0.0	0.0	0.0	0.0	0.0	0.0	0.0	0.0
BMPR1B	658	symbol	H. sapiens	658	H. sapiens	BMPR1B	bone morphogenetic protein receptor type 1B	GO:0001550 ovarian cumulus expansion;GO:0048165 fused antrum stage;GO:1902731 negative regulation of chondrocyte proliferation	TKL Ser/Thr protein kinase family	Kinases:TKL Ser/Thr protein kinases; CD markers; Human disease related genes:Congenital malformations:Congenital malformations of the musculoskeletal system; Disease related genes; Potential drug targets; Enzymes; Predicted intracellular proteins; ENZYME proteins:Transferases		Fostamatinib	(M181)PID BMP PATHWAY	(M5908)HALLMARK ANDROGEN RESPONSE; (M5935)HALLMARK FATTY ACID METABOLISM; (M5956)HALLMARK KRAS SIGNALING DN	1.0	0.0	0.0	0.0	0.0	0.0	0.0	1.0	0.0	0.0	1.0	0.0	1.0	0.0	1.0	0.0	1.0	1.0	0.0	0.0
C20orf194	25943	gene_synonym	H. sapiens	25943	H. sapiens	DNAAF9	dynein axonemal assembly factor 9	GO:0008150 biological_process		Predicted intracellular proteins	Cytosol;Nucleoli fibrillar center (Approved)				0.0	0.0	0.0	0.0	0.0	0.0	0.0	0.0	0.0	0.0	0.0	0.0	0.0	0.0	0.0	0.0	0.0	0.0	0.0	0.0
ARHGAP21	57584	symbol	H. sapiens	57584	H. sapiens	ARHGAP21	Rho GTPase activating protein 21	GO:0051684 maintenance of Golgi location;GO:0051683 establishment of Golgi localization;GO:0051657 maintenance of organelle location		Predicted intracellular proteins	Actin filaments;Cell Junctions (Supported); Additional: Plasma membrane				0.0	0.0	0.0	0.0	0.0	0.0	0.0	0.0	0.0	0.0	0.0	0.0	0.0	0.0	0.0	0.0	0.0	0.0	0.0	0.0
F8	2157	symbol	H. sapiens	2157	H. sapiens	F8	coagulation factor VIII	GO:0007597 blood coagulation, intrinsic pathway;GO:0072378 blood coagulation, fibrin clot formation;GO:0072376 protein activation cascade		Candidate cardiovascular disease genes; Human disease related genes:Cardiovascular diseases:Hematologic diseases; Predicted secreted proteins; FDA approved drug targets:Biotech drugs; Disease related genes; Predicted intracellular proteins		Drotrecogin alfa; Coagulation Factor IX (Recombinant); TB-402; Thrombin; Protein C; Human thrombin; Thrombin alfa; Vonicog Alfa; Von Willebrand Factor Human; Anti-inhibitor coagulant complex; Coagulation Factor IX Human; Nonacog beta pegol; Damoctocog alfa pegol		(M5946)HALLMARK COAGULATION; (M5921)HALLMARK COMPLEMENT	0.0	0.0	0.0	0.0	0.0	0.0	0.0	0.0	0.0	0.0	0.0	0.0	0.0	0.0	0.0	0.0	0.0	0.0	1.0	0.0
NRP1	8829	symbol	H. sapiens	8829	H. sapiens	NRP1	neuropilin 1	GO:0060301 positive regulation of cytokine activity;GO:1902378 VEGF-activated neuropilin signaling pathway involved in axon guidance;GO:1905040 otic placode development		CD markers; Cancer-related genes:Candidate cancer biomarkers; Transporters:Accessory Factors Involved in Transport; Predicted secreted proteins; Predicted intracellular proteins		Palifermin; Pegaptanib	(M137)PID VEGF VEGFR PATHWAY; (M226)PID VEGFR1 PATHWAY	(M5919)HALLMARK HEDGEHOG SIGNALING; (M5944)HALLMARK ANGIOGENESIS; (M5942)HALLMARK UV RESPONSE DN	1.0	1.0	1.0	0.0	0.0	0.0	0.0	1.0	0.0	1.0	1.0	0.0	1.0	0.0	0.0	0.0	0.0	1.0	0.0	0.0
C1QTNF1	114897	symbol	H. sapiens	114897	H. sapiens	C1QTNF1	C1q and TNF related 1	GO:2000857 positive regulation of mineralocorticoid secretion;GO:2000860 positive regulation of aldosterone secretion;GO:2000855 regulation of mineralocorticoid secretion		Predicted secreted proteins; Predicted intracellular proteins	Cytosol;Nucleoplasm (Approved)		(M5880)NABA ECM AFFILIATED; (M5885)NABA MATRISOME ASSOCIATED; (M5889)NABA MATRISOME		1.0	1.0	0.0	0.0	0.0	1.0	0.0	0.0	0.0	0.0	0.0	1.0	0.0	1.0	0.0	0.0	0.0	0.0	1.0	0.0
RSPO3	84870	symbol	H. sapiens	84870	H. sapiens	RSPO3	R-spondin 3	GO:2000096 positive regulation of Wnt signaling pathway, planar cell polarity pathway;GO:0060670 branching involved in labyrinthine layer morphogenesis;GO:2000052 positive regulation of non-canonical Wnt signaling pathway		Predicted secreted proteins; Cancer-related genes			(M3008)NABA ECM GLYCOPROTEINS; (M5884)NABA CORE MATRISOME; (M5889)NABA MATRISOME		0.0	0.0	0.0	0.0	0.0	0.0	0.0	0.0	0.0	1.0	0.0	0.0	0.0	0.0	1.0	0.0	0.0	0.0	0.0	0.0
SLC2A9	56606	symbol	H. sapiens	56606	H. sapiens	SLC2A9	solute carrier family 2 member 9	GO:0015747 urate transport;GO:0046415 urate metabolic process;GO:1904659 glucose transmembrane transport		Human disease related genes:Urinary system diseases:Kidney diseases; Transporters:Electrochemical Potential-driven transporters; Disease related genes; Potential drug targets					0.0	0.0	0.0	0.0	1.0	0.0	0.0	0.0	0.0	0.0	0.0	0.0	0.0	0.0	0.0	0.0	0.0	0.0	0.0	0.0
PGR	5241	symbol	H. sapiens	5241	H. sapiens	PGR	progesterone receptor	GO:0060748 tertiary branching involved in mammary gland duct morphogenesis;GO:0060745 mammary gland branching involved in pregnancy;GO:0038001 paracrine signaling		Transporters; FDA approved drug targets:Small molecule drugs; Cancer-related genes:Candidate cancer biomarkers; Transcription factors:Zinc-coordinating DNA-binding domains; Nuclear receptors; Predicted intracellular proteins		Etonogestrel; Desogestrel; Megestrol acetate; Levonorgestrel; Dydrogesterone; Progesterone; Spironolactone; Lindane; Fluticasone propionate; Medroxyprogesterone acetate; Mitotane; Norethisterone; Mometasone; Ethynodiol diacetate; Mifepristone; Norgestimate; Drospirenone; Danazol; Oxybenzone; Allylestrenol; Phthalic Acid; Metribolone; Tanaproget; Telapristone acetate; Asoprisnil; Norelgestromin; G…	(M267)PID ANTHRAX PATHWAY; (M200)PID ERA GENOMIC PATHWAY	(M5906)HALLMARK ESTROGEN RESPONSE EARLY; (M5907)HALLMARK ESTROGEN RESPONSE LATE	0.0	0.0	0.0	1.0	0.0	0.0	0.0	0.0	0.0	1.0	0.0	0.0	1.0	0.0	1.0	1.0	0.0	0.0	0.0	0.0
DCUN1D2	55208	symbol	H. sapiens	55208	H. sapiens	DCUN1D2	defective in cullin neddylation 1 domain containing 2	GO:2000436 positive regulation of protein neddylation;GO:2000434 regulation of protein neddylation;GO:0045116 protein neddylation		Predicted intracellular proteins	Cytosol;Plasma membrane (Approved)				1.0	0.0	0.0	0.0	0.0	0.0	0.0	0.0	0.0	0.0	0.0	0.0	0.0	0.0	0.0	0.0	0.0	0.0	0.0	0.0
PDGFB	5155	symbol	H. sapiens	5155	H. sapiens	PDGFB	platelet derived growth factor subunit B	GO:0072255 metanephric glomerular mesangial cell development;GO:0072209 metanephric mesangial cell differentiation;GO:0072254 metanephric glomerular mesangial cell differentiation		Candidate cardiovascular disease genes; Human disease related genes:Cancers:Cancers of eye, brain, and central nervous system; Cancer-related genes:Candidate cancer biomarkers; Predicted secreted proteins; Predicted intracellular proteins; Disease related genes; Human disease related genes:Cancers:Cancers of the lung and pleura; RAS pathway related proteins; Human disease related genes:Nervous sy…	Vesicles (Approved)	Pegpleranib	(M103)PID S1P S1P1 PATHWAY; (M55)PID S1P S1P3 PATHWAY; (M72)PID NECTIN PATHWAY	(M5946)HALLMARK COAGULATION; (M5891)HALLMARK HYPOXIA; (M5921)HALLMARK COMPLEMENT	1.0	1.0	1.0	1.0	0.0	1.0	0.0	1.0	0.0	1.0	1.0	1.0	1.0	1.0	1.0	1.0	1.0	1.0	1.0	0.0
JAK2	3717	symbol	H. sapiens	3717	H. sapiens	JAK2	Janus kinase 2	GO:0031959 mineralocorticoid receptor signaling pathway;GO:0034050 programmed cell death induced by symbiont;GO:0035406 histone-tyrosine phosphorylation	Tyr protein kinase family	Human disease related genes:Cardiovascular diseases:Vascular diseases; FDA approved drug targets:Small molecule drugs; Human disease related genes:Cancers:Cancers of haematopoietic and lymphoid tissues; Human disease related genes:Cardiovascular diseases:Hematologic diseases; Cancer-related genes:Mutational cancer driver genes; Kinases:Tyr protein kinases; Disease related genes; Enzymes; Predicte…	Nucleoplasm (Supported); Additional: Focal adhesion sites;Plasma membrane	2-tert-butyl-9-fluoro-1,6-dihydrobenzo[h]imidazo[4,5-f]isoquinolin-7-one; XL019; 5-phenyl-1H-indazol-3-amine; 4-(3-amino-1H-indazol-5-yl)-N-tert-butylbenzenesulfonamide; 4-[(2-{4-[(CYCLOPROPYLCARBAMOYL)AMINO]-1H-PYRAZOL-3-YL}-1H-BENZIMIDAZOL-6-YL)METHYL]MORPHOLIN-4-IUM; Ruxolitinib; Tofacitinib; Baricitinib; Entrectinib; Fostamatinib; Fedratinib; Zanubrutinib	(M135)PID IL5 PATHWAY; (M36)PID IL27 PATHWAY; (M182)PID IL3 PATHWAY	(M5906)HALLMARK ESTROGEN RESPONSE EARLY; (M5907)HALLMARK ESTROGEN RESPONSE LATE; (M5913)HALLMARK INTERFERON GAMMA RESPONSE	1.0	1.0	1.0	1.0	0.0	0.0	0.0	1.0	0.0	0.0	0.0	1.0	1.0	1.0	0.0	1.0	1.0	1.0	1.0	0.0
SMPDL3A	10924	symbol	H. sapiens	10924	H. sapiens	SMPDL3A	sphingomyelin phosphodiesterase acid like 3A	GO:0009143 nucleoside triphosphate catabolic process;GO:1901292 nucleoside phosphate catabolic process;GO:0009141 nucleoside triphosphate metabolic process		Predicted secreted proteins; Predicted intracellular proteins	Mitochondria;Nucleoli;Nucleoplasm (Approved)			(M5947)HALLMARK IL2 STAT5 SIGNALING	0.0	0.0	0.0	0.0	0.0	0.0	0.0	0.0	0.0	0.0	0.0	0.0	0.0	0.0	0.0	0.0	0.0	0.0	0.0	0.0
AKAP7	9465	symbol	H. sapiens	9465	H. sapiens	AKAP7	A-kinase anchoring protein 7	GO:0010738 regulation of protein kinase A signaling;GO:0050804 modulation of chemical synaptic transmission;GO:0099177 regulation of trans-synaptic signaling		Predicted intracellular proteins	Vesicles (Approved)			(M5916)HALLMARK APICAL SURFACE	0.0	0.0	0.0	0.0	0.0	0.0	0.0	0.0	0.0	0.0	0.0	0.0	0.0	0.0	0.0	0.0	0.0	0.0	0.0	0.0
CUBN	8029	symbol	H. sapiens	8029	H. sapiens	CUBN	cubilin	GO:0015889 cobalamin transport;GO:0009235 cobalamin metabolic process;GO:0042953 lipoprotein transport		Human disease related genes:Cardiovascular diseases:Hematologic diseases; Predicted intracellular proteins; Disease related genes		Hydroxocobalamin			0.0	0.0	0.0	0.0	1.0	0.0	0.0	0.0	1.0	0.0	0.0	0.0	0.0	0.0	0.0	0.0	0.0	0.0	0.0	0.0
LINC00607	646324	symbol	H. sapiens	646324	H. sapiens	LINC00607	long intergenic non-protein coding RNA 607								0.0	0.0	0.0	0.0	0.0	0.0	0.0	0.0	0.0	0.0	0.0	0.0	0.0	0.0	0.0	0.0	0.0	0.0	0.0	0.0
TC2N	123036	symbol	H. sapiens	123036	H. sapiens	TC2N	tandem C2 domains, nuclear			Predicted intracellular proteins	Nuclear bodies;Nucleoplasm (Approved)				0.0	0.0	0.0	0.0	0.0	0.0	0.0	0.0	0.0	0.0	0.0	0.0	0.0	0.0	0.0	0.0	0.0	0.0	0.0	0.0
HSPB7	27129	symbol	H. sapiens	27129	H. sapiens	HSPB7	heat shock protein family B (small) member 7	GO:0006986 response to unfolded protein;GO:0035966 response to topologically incorrect protein;GO:0008016 regulation of heart contraction		Predicted intracellular proteins	Nucleoplasm (Approved)				0.0	0.0	0.0	0.0	0.0	0.0	0.0	0.0	0.0	1.0	0.0	1.0	0.0	0.0	0.0	0.0	0.0	0.0	0.0	0.0
ODF2L	57489	symbol	H. sapiens	57489	H. sapiens	ODF2L	outer dense fiber of sperm tails 2 like	GO:1902018 negative regulation of cilium assembly;GO:0120033 negative regulation of plasma membrane bounded cell projection assembly;GO:1902116 negative regulation of organelle assembly		Predicted intracellular proteins					0.0	0.0	0.0	0.0	0.0	0.0	0.0	0.0	0.0	0.0	0.0	0.0	0.0	0.0	0.0	0.0	0.0	0.0	0.0	0.0
ARL2BP	23568	symbol	H. sapiens	23568	H. sapiens	ARL2BP	ADP ribosylation factor like GTPase 2 binding protein	GO:0051457 maintenance of protein location in nucleus;GO:0072595 maintenance of protein localization in organelle;GO:0032507 maintenance of protein location in cell		Human disease related genes:Nervous system diseases:Eye disease; Predicted intracellular proteins; Disease related genes	Cytosol;Nucleoplasm (Supported)			(M5945)HALLMARK HEME METABOLISM	1.0	0.0	0.0	0.0	1.0	0.0	0.0	0.0	0.0	0.0	0.0	0.0	0.0	0.0	0.0	0.0	0.0	0.0	0.0	0.0
BVES	11149	symbol	H. sapiens	11149	H. sapiens	BVES	blood vessel epicardial substance	GO:0060931 sinoatrial node cell development;GO:0060921 sinoatrial node cell differentiation;GO:0060926 cardiac pacemaker cell development		Transporters:Accessory Factors Involved in Transport; Human disease related genes:Musculoskeletal diseases:Muscular diseases; Disease related genes; Potential drug targets	Cell Junctions;Plasma membrane (Supported)				0.0	0.0	1.0	0.0	0.0	0.0	0.0	0.0	0.0	1.0	0.0	1.0	0.0	0.0	0.0	0.0	0.0	1.0	0.0	0.0
DNM1	1759	symbol	H. sapiens	1759	H. sapiens	DNM1	dynamin 1	GO:0016185 synaptic vesicle budding from presynaptic endocytic zone membrane;GO:0070142 synaptic vesicle budding;GO:0048489 synaptic vesicle transport		Human disease related genes:Nervous system diseases:Epilepsy; ENZYME proteins:Hydrolases; Disease related genes; Potential drug targets; Enzymes; Predicted intracellular proteins			(M252)PID IL8 CXCR1 PATHWAY; (M257)PID EPHRINB REV PATHWAY; (M210)PID IL8 CXCR2 PATHWAY		0.0	0.0	0.0	0.0	0.0	1.0	0.0	1.0	0.0	0.0	0.0	0.0	1.0	0.0	0.0	1.0	0.0	1.0	0.0	0.0
ARHGAP12	94134	symbol	H. sapiens	94134	H. sapiens	ARHGAP12	Rho GTPase activating protein 12	GO:0002011 morphogenesis of an epithelial sheet;GO:0051058 negative regulation of small GTPase mediated signal transduction;GO:0006911 phagocytosis, engulfment		Predicted intracellular proteins					0.0	0.0	0.0	0.0	0.0	0.0	0.0	0.0	0.0	0.0	0.0	0.0	0.0	0.0	0.0	0.0	0.0	0.0	0.0	0.0
CYP3A5	1577	symbol	H. sapiens	1577	H. sapiens	CYP3A5	cytochrome P450 family 3 subfamily A member 5	GO:0009822 alkaloid catabolic process;GO:0002933 lipid hydroxylation;GO:0043385 mycotoxin metabolic process		ENZYME proteins:Oxidoreductases; Enzymes; Predicted intracellular proteins; Cancer-related genes:Candidate cancer biomarkers	Cytosol (Approved); Additional: Vesicles	Cannabidiol; Nabiximols			0.0	0.0	0.0	0.0	0.0	0.0	0.0	0.0	1.0	0.0	0.0	0.0	0.0	0.0	0.0	0.0	0.0	0.0	0.0	0.0
OSBPL3	26031	symbol	H. sapiens	26031	H. sapiens	OSBPL3	oxysterol binding protein like 3	GO:0006699 bile acid biosynthetic process;GO:0008206 bile acid metabolic process;GO:0015918 sterol transport		Predicted intracellular proteins	Cytosol (Supported); Additional: Nucleoli				0.0	0.0	0.0	0.0	0.0	0.0	0.0	0.0	1.0	0.0	0.0	0.0	0.0	0.0	0.0	0.0	0.0	0.0	0.0	0.0
LOC105375734	105375734	Gene_ID	H. sapiens	105375734	H. sapiens	SMILR	smooth muscle induced lncRNA, enhancer of proliferation								0.0	0.0	0.0	0.0	0.0	0.0	0.0	0.0	0.0	0.0	0.0	0.0	0.0	0.0	0.0	0.0	0.0	0.0	0.0	0.0
PARP4	143	symbol	H. sapiens	143	H. sapiens	PARP4	poly(ADP-ribose) polymerase family member 4	GO:0140289 protein mono-ADP-ribosylation;GO:0006471 protein ADP-ribosylation;GO:0051972 regulation of telomerase activity		Predicted intracellular proteins	Nucleoplasm (Supported); Additional: Cytosol				0.0	0.0	0.0	0.0	0.0	1.0	0.0	0.0	0.0	0.0	0.0	0.0	0.0	0.0	0.0	0.0	0.0	0.0	0.0	0.0
C15orf59	388135	gene_synonym	H. sapiens	388135	H. sapiens	INSYN1	inhibitory synaptic factor 1	GO:0060080 inhibitory postsynaptic potential;GO:0099565 chemical synaptic transmission, postsynaptic;GO:0060078 regulation of postsynaptic membrane potential		Predicted intracellular proteins	Cytosol;Nucleoplasm (Approved)				0.0	0.0	0.0	0.0	0.0	0.0	0.0	0.0	0.0	0.0	0.0	0.0	0.0	0.0	0.0	0.0	0.0	0.0	0.0	0.0
CYBRD1	79901	symbol	H. sapiens	79901	H. sapiens	CYBRD1	cytochrome b reductase 1	GO:0033215 reductive iron assimilation;GO:0140576 ascorbate homeostasis;GO:0033212 iron import into cell		Enzymes; ENZYME proteins; Transporters:Transport Electron Carriers	Plasma membrane (Supported)				0.0	0.0	0.0	0.0	1.0	0.0	1.0	0.0	0.0	0.0	0.0	1.0	0.0	0.0	0.0	0.0	0.0	0.0	0.0	0.0
LOC105747689	105747689	Gene_ID	H. sapiens	105747689	H. sapiens	NABP1-OT1	NABP1 3'UTR overlapping transcript 1								0.0	0.0	0.0	0.0	0.0	0.0	0.0	0.0	0.0	0.0	0.0	0.0	0.0	0.0	0.0	0.0	0.0	0.0	0.0	0.0
LIPC	3990	symbol	H. sapiens	3990	H. sapiens	LIPC	lipase C, hepatic type	GO:0034373 intermediate-density lipoprotein particle remodeling;GO:0034382 chylomicron remnant clearance;GO:0071830 triglyceride-rich lipoprotein particle clearance		ENZYME proteins:Hydrolases; Predicted secreted proteins; Human disease related genes:Congenital disorders of metabolism:Congenital disorders of lipid/glycolipid metabolism; Disease related genes; Potential drug targets; Enzymes					0.0	0.0	0.0	0.0	1.0	0.0	0.0	0.0	1.0	0.0	0.0	0.0	0.0	0.0	0.0	0.0	0.0	0.0	0.0	0.0
ZC3H12B	340554	symbol	H. sapiens	340554	H. sapiens	ZC3H12B	zinc finger CCCH-type containing 12B	GO:0090502 RNA phosphodiester bond hydrolysis, endonucleolytic;GO:0090501 RNA phosphodiester bond hydrolysis;GO:0090305 nucleic acid phosphodiester bond hydrolysis		Predicted intracellular proteins	Endoplasmic reticulum (Approved); Additional: Golgi apparatus;Vesicles				0.0	0.0	0.0	0.0	0.0	0.0	0.0	0.0	0.0	0.0	0.0	0.0	0.0	0.0	0.0	0.0	0.0	0.0	0.0	0.0
ABCC3	8714	symbol	H. sapiens	8714	H. sapiens	ABCC3	ATP binding cassette subfamily C member 3	GO:0015779 glucuronoside transport;GO:1901656 glycoside transport;GO:0006855 xenobiotic transmembrane transport		Cancer-related genes:Candidate cancer biomarkers; ENZYME proteins; Enzymes; Transporters:Primary Active Transporters; Predicted intracellular proteins	Plasma membrane (Supported)			(M5934)HALLMARK XENOBIOTIC METABOLISM	0.0	0.0	0.0	0.0	1.0	0.0	0.0	0.0	1.0	0.0	0.0	0.0	0.0	0.0	0.0	0.0	0.0	0.0	0.0	0.0
SH3KBP1	30011	symbol	H. sapiens	30011	H. sapiens	SH3KBP1	SH3 domain containing kinase binding protein 1	GO:0008360 regulation of cell shape;GO:0050871 positive regulation of B cell activation;GO:0050864 regulation of B cell activation		Predicted intracellular proteins; Disease related genes	Cytosol (Supported)		(M214)PID ERBB1 INTERNALIZATION PATHWAY; (M48)PID MET PATHWAY		0.0	1.0	0.0	0.0	0.0	0.0	0.0	1.0	0.0	0.0	0.0	0.0	1.0	0.0	0.0	0.0	0.0	1.0	0.0	0.0
RAC1	5879	symbol	H. sapiens	5879	H. sapiens	RAC1	Rac family small GTPase 1	GO:0032707 negative regulation of interleukin-23 production;GO:0010764 negative regulation of fibroblast migration;GO:0032667 regulation of interleukin-23 production		Cancer-related genes:Mutated cancer genes; Human disease related genes:Other diseases:Mental and behavioural disorders; Cancer-related genes:Candidate cancer biomarkers; ENZYME proteins:Hydrolases; Cancer-related genes:Mutational cancer driver genes; Disease related genes; Potential drug targets; Enzymes; RAS pathway related proteins; Predicted intracellular proteins	Cytosol;Nucleoplasm (Approved); Additional: Nucleoli	Azathioprine; Guanosine-5'-Diphosphate	(M120)PID ARF6 DOWNSTREAM PATHWAY; (M243)PID ARF 3PATHWAY; (M273)PID EPHA2 FWD PATHWAY	(M5923)HALLMARK PI3K AKT MTOR SIGNALING; (M5946)HALLMARK COAGULATION	1.0	1.0	1.0	0.0	0.0	0.0	0.0	1.0	0.0	0.0	0.0	0.0	1.0	1.0	0.0	1.0	0.0	1.0	1.0	1.0
MAP3K4	4216	symbol	H. sapiens	4216	H. sapiens	MAP3K4	mitogen-activated protein kinase kinase kinase 4	GO:0007542 primary sex determination, germ-line;GO:0018992 germ-line sex determination;GO:0019100 male germ-line sex determination	STE Ser/Thr protein kinase family	Cancer-related genes:Mutational cancer driver genes; Enzymes; Kinases:STE Ser/Thr protein kinases; Predicted intracellular proteins; ENZYME proteins:Transferases	Cytosol (Approved)	Fostamatinib	(M20)PID P38 MKK3 6PATHWAY		1.0	0.0	0.0	0.0	0.0	0.0	0.0	1.0	0.0	0.0	0.0	0.0	1.0	0.0	1.0	0.0	0.0	0.0	0.0	0.0
CMYA5	202333	symbol	H. sapiens	202333	H. sapiens	CMYA5	cardiomyopathy associated 5			Predicted intracellular proteins	Cytosol;Nuclear speckles (Approved); Additional: Plasma membrane;Vesicles				0.0	0.0	0.0	0.0	0.0	0.0	0.0	0.0	0.0	0.0	0.0	0.0	0.0	0.0	0.0	0.0	0.0	0.0	0.0	0.0
PRKD3	23683	symbol	H. sapiens	23683	H. sapiens	PRKD3	protein kinase D3	GO:0089700 protein kinase D signaling;GO:0007205 protein kinase C-activating G protein-coupled receptor signaling pathway;GO:0030148 sphingolipid biosynthetic process	CAMK Ser/Thr protein kinase family	Enzymes; Kinases:CAMK Ser/Thr protein kinases; Predicted intracellular proteins; ENZYME proteins:Transferases	Cytosol;Nucleoplasm (Approved)				0.0	0.0	0.0	0.0	0.0	0.0	0.0	0.0	1.0	0.0	0.0	0.0	0.0	0.0	0.0	1.0	0.0	0.0	0.0	0.0
RAET1G	353091	symbol	H. sapiens	353091	H. sapiens	RAET1G	retinoic acid early transcript 1G	GO:0002729 positive regulation of natural killer cell cytokine production;GO:0002727 regulation of natural killer cell cytokine production;GO:0042267 natural killer cell mediated cytotoxicity		Predicted secreted proteins	Plasma membrane;Vesicles (Supported)				0.0	0.0	1.0	0.0	0.0	0.0	0.0	0.0	0.0	0.0	0.0	0.0	0.0	0.0	0.0	0.0	0.0	0.0	0.0	0.0
SLC9A9	285195	symbol	H. sapiens	285195	H. sapiens	SLC9A9	solute carrier family 9 member A9	GO:0098719 sodium ion import across plasma membrane;GO:0051453 regulation of intracellular pH;GO:0030641 regulation of cellular pH		Transporters:Electrochemical Potential-driven transporters; Human disease related genes:Other diseases:Mental and behavioural disorders; Disease related genes; Potential drug targets					0.0	0.0	0.0	0.0	1.0	0.0	1.0	0.0	0.0	0.0	0.0	1.0	0.0	0.0	0.0	0.0	0.0	0.0	0.0	0.0
MAML3	55534	symbol	H. sapiens	55534	H. sapiens	MAML3	mastermind like transcriptional coactivator 3	GO:0007221 positive regulation of transcription of Notch receptor target;GO:0007219 Notch signaling pathway;GO:0045944 positive regulation of transcription by RNA polymerase II		Predicted intracellular proteins	Nuclear speckles (Supported)				0.0	0.0	0.0	0.0	0.0	0.0	0.0	1.0	0.0	0.0	0.0	0.0	1.0	0.0	0.0	0.0	0.0	0.0	0.0	0.0
AGPAT9	79888	gene_synonym	H. sapiens	79888	H. sapiens	LPCAT1	lysophosphatidylcholine acyltransferase 1	GO:2001246 negative regulation of phosphatidylcholine biosynthetic process;GO:0150174 negative regulation of phosphatidylcholine metabolic process;GO:2001245 regulation of phosphatidylcholine biosynthetic process		Enzymes; ENZYME proteins:Transferases	Endoplasmic reticulum (Supported); Additional: Lipid droplets				0.0	0.0	0.0	0.0	0.0	0.0	0.0	0.0	1.0	0.0	0.0	0.0	0.0	0.0	0.0	0.0	0.0	0.0	0.0	0.0
TPST1	8460	symbol	H. sapiens	8460	H. sapiens	TPST1	tyrosylprotein sulfotransferase 1	GO:0006478 peptidyl-tyrosine sulfation;GO:0006477 protein sulfation;GO:0034035 purine ribonucleoside bisphosphate metabolic process		Enzymes; Predicted intracellular proteins; ENZYME proteins:Transferases	Golgi apparatus (Supported)			(M5934)HALLMARK XENOBIOTIC METABOLISM; (M5937)HALLMARK GLYCOLYSIS	0.0	0.0	0.0	0.0	0.0	0.0	0.0	0.0	0.0	0.0	0.0	0.0	0.0	0.0	0.0	0.0	0.0	0.0	0.0	0.0
DCDC5	341019	gene_synonym	H. sapiens	341019	H. sapiens	DCDC1	doublecortin domain containing 1	GO:1902412 regulation of mitotic cytokinesis;GO:0032465 regulation of cytokinesis;GO:0051302 regulation of cell division		Predicted intracellular proteins					0.0	0.0	0.0	0.0	0.0	0.0	0.0	0.0	0.0	0.0	0.0	0.0	1.0	0.0	0.0	0.0	0.0	0.0	0.0	0.0
CYP7B1	9420	symbol	H. sapiens	9420	H. sapiens	CYP7B1	cytochrome P450 family 7 subfamily B member 1	GO:0035754 B cell chemotaxis;GO:0033147 negative regulation of intracellular estrogen receptor signaling pathway;GO:0060740 prostate gland epithelium morphogenesis		Human disease related genes:Nervous system diseases:Other nervous and sensory system diseases; ENZYME proteins:Oxidoreductases; Human disease related genes:Congenital disorders of metabolism:Congenital disorders of lipid/glycolipid metabolism; Disease related genes; Potential drug targets; Enzymes				(M5948)HALLMARK BILE ACID METABOLISM	0.0	0.0	0.0	0.0	0.0	0.0	0.0	0.0	1.0	0.0	0.0	0.0	0.0	0.0	1.0	0.0	0.0	1.0	0.0	0.0
TGFA	7039	symbol	H. sapiens	7039	H. sapiens	TGFA	transforming growth factor alpha	GO:0072574 hepatocyte proliferation;GO:0072575 epithelial cell proliferation involved in liver morphogenesis;GO:0072576 liver morphogenesis		Human disease related genes:Cancers:Cancers of the digestive system; RAS pathway related proteins; Predicted secreted proteins; Cancer-related genes:Candidate cancer biomarkers	Vesicles (Approved)		(M201)PID ERBB NETWORK PATHWAY; (M176)PID FOXM1 PATHWAY; (M145)PID P53 DOWNSTREAM PATHWAY	(M5937)HALLMARK GLYCOLYSIS; (M5939)HALLMARK P53 PATHWAY	1.0	0.0	0.0	0.0	0.0	1.0	0.0	1.0	0.0	1.0	0.0	0.0	1.0	0.0	0.0	1.0	0.0	0.0	1.0	0.0
TGFBR2	7048	symbol	H. sapiens	7048	H. sapiens	TGFBR2	transforming growth factor beta receptor 2	GO:0002649 regulation of tolerance induction to self antigen;GO:0002651 positive regulation of tolerance induction to self antigen;GO:1905317 inferior endocardial cushion morphogenesis	TKL Ser/Thr protein kinase family	Human disease related genes:Cardiovascular diseases:Vascular diseases; Human disease related genes:Cancers:Cancers of the digestive system; Cancer-related genes:Mutated cancer genes; Kinases:TKL Ser/Thr protein kinases; Human disease related genes:Congenital malformations:Congenital malformations of the circulatory system; Cancer-related genes:Mutational cancer driver genes; FDA approved drug tar…	Plasma membrane (Supported)	Foreskin fibroblast (neonatal); Foreskin keratinocyte (neonatal); Fostamatinib	(M185)PID ALK1 PATHWAY; (M33)PID GLYPICAN 1PATHWAY; (M53)PID INTEGRIN3 PATHWAY	(M5942)HALLMARK UV RESPONSE DN	1.0	1.0	1.0	1.0	0.0	0.0	0.0	1.0	0.0	1.0	1.0	0.0	1.0	0.0	0.0	1.0	1.0	0.0	1.0	0.0
RNF128	79589	symbol	H. sapiens	79589	H. sapiens	RNF128	ring finger protein 128	GO:1904352 positive regulation of protein catabolic process in the vacuole;GO:1904350 regulation of protein catabolic process in the vacuole;GO:0061462 protein localization to lysosome		Enzymes; ENZYME proteins:Transferases			(M60)PID NFAT TFPATHWAY		0.0	0.0	0.0	0.0	0.0	0.0	0.0	0.0	0.0	0.0	0.0	0.0	0.0	1.0	0.0	0.0	0.0	0.0	0.0	0.0
LINC01021	643401	gene_synonym	H. sapiens	643401	H. sapiens	PURPL	p53 upregulated regulator of p53 levels								0.0	0.0	0.0	0.0	0.0	0.0	0.0	0.0	0.0	0.0	0.0	0.0	0.0	0.0	0.0	0.0	0.0	0.0	0.0	0.0
PHACTR3	116154	symbol	H. sapiens	116154	H. sapiens	PHACTR3	phosphatase and actin regulator 3	GO:0030036 actin cytoskeleton organization;GO:0030029 actin filament-based process;GO:0043086 negative regulation of catalytic activity		Predicted intracellular proteins	Nucleoplasm (Enhanced)				0.0	0.0	0.0	0.0	0.0	0.0	0.0	0.0	0.0	0.0	0.0	0.0	0.0	0.0	0.0	0.0	0.0	0.0	0.0	0.0
EXOC1	55763	symbol	H. sapiens	55763	H. sapiens	EXOC1	exocyst complex component 1	GO:0006893 Golgi to plasma membrane transport;GO:0048015 phosphatidylinositol-mediated signaling;GO:0048017 inositol lipid-mediated signaling		Transporters:Transporter channels and pores; Predicted intracellular proteins	Plasma membrane (Approved); Additional: Cytosol;Microtubules		(M16)PID INSULIN PATHWAY; (M67)PID ARF6 TRAFFICKING PATHWAY		0.0	0.0	0.0	0.0	0.0	0.0	0.0	0.0	0.0	0.0	0.0	0.0	0.0	0.0	0.0	0.0	0.0	0.0	0.0	0.0
GAB3	139716	symbol	H. sapiens	139716	H. sapiens	GAB3	GRB2 associated binding protein 3	GO:0030225 macrophage differentiation;GO:0002573 myeloid leukocyte differentiation;GO:0030099 myeloid cell differentiation		Predicted intracellular proteins	Nuclear speckles (Approved); Additional: Cytosol;Nucleoplasm				0.0	0.0	0.0	0.0	0.0	0.0	0.0	0.0	0.0	0.0	0.0	0.0	0.0	0.0	0.0	0.0	0.0	0.0	0.0	0.0
FTO	79068	symbol	H. sapiens	79068	H. sapiens	FTO	FTO alpha-ketoglutarate dependent dioxygenase	GO:0042245 RNA repair;GO:0070350 regulation of white fat cell proliferation;GO:0035552 oxidative single-stranded DNA demethylation		ENZYME proteins:Oxidoreductases; Human disease related genes:Endocrine and metabolic diseases:Other endocrine and metabolic diseases; Human disease related genes:Congenital malformations:Other congenital malformations; Disease related genes; Potential drug targets; Enzymes; Human disease related genes:Endocrine and metabolic diseases:Diabetes; Predicted intracellular proteins	Cytosol (Supported); Additional: Vesicles	Artenimol			0.0	0.0	0.0	0.0	0.0	0.0	0.0	0.0	0.0	0.0	0.0	1.0	0.0	0.0	0.0	0.0	0.0	0.0	0.0	0.0
ZFP36L1	677	symbol	H. sapiens	677	H. sapiens	ZFP36L1	ZFP36 ring finger protein like 1	GO:0097403 cellular response to raffinose;GO:1901545 response to raffinose;GO:0003342 proepicardium development		Predicted intracellular proteins; Cancer-related genes:Mutational cancer driver genes			(M254)PID MYC REPRESS PATHWAY	(M5939)HALLMARK P53 PATHWAY	0.0	1.0	0.0	1.0	0.0	0.0	0.0	1.0	0.0	1.0	1.0	0.0	0.0	0.0	1.0	0.0	1.0	0.0	1.0	0.0
TMEM140	55281	symbol	H. sapiens	55281	H. sapiens	TMEM140	transmembrane protein 140							(M5911)HALLMARK INTERFERON ALPHA RESPONSE	0.0	0.0	0.0	0.0	0.0	0.0	0.0	0.0	0.0	0.0	0.0	0.0	0.0	0.0	0.0	0.0	0.0	0.0	0.0	0.0
GREM2	64388	symbol	H. sapiens	64388	H. sapiens	GREM2	gremlin 2, DAN family BMP antagonist	GO:0060300 regulation of cytokine activity;GO:0038098 sequestering of BMP from receptor via BMP binding;GO:0010172 embryonic body morphogenesis		Predicted secreted proteins; Human disease related genes:Digestive system diseases:Mouth and dental diseases; Disease related genes					0.0	0.0	0.0	0.0	0.0	0.0	0.0	0.0	0.0	0.0	0.0	0.0	0.0	0.0	0.0	0.0	1.0	0.0	0.0	0.0
C1QTNF3	114899	symbol	H. sapiens	114899	H. sapiens	C1QTNF3	C1q and TNF related 3	GO:0070165 positive regulation of adiponectin secretion;GO:0071638 negative regulation of monocyte chemotactic protein-1 production;GO:0070163 regulation of adiponectin secretion		Predicted secreted proteins	Golgi apparatus (Approved)		(M5880)NABA ECM AFFILIATED; (M5885)NABA MATRISOME ASSOCIATED; (M5889)NABA MATRISOME		0.0	0.0	0.0	0.0	0.0	1.0	0.0	0.0	0.0	0.0	0.0	1.0	0.0	1.0	0.0	0.0	0.0	0.0	0.0	0.0
LGI2	55203	symbol	H. sapiens	55203	H. sapiens	LGI2	leucine rich repeat LGI family member 2	GO:1904862 inhibitory synapse assembly;GO:0007416 synapse assembly;GO:0034329 cell junction assembly		Predicted secreted proteins	Centrosome (Uncertain)		(M3008)NABA ECM GLYCOPROTEINS; (M5884)NABA CORE MATRISOME; (M5889)NABA MATRISOME		0.0	0.0	0.0	0.0	0.0	0.0	0.0	0.0	0.0	0.0	0.0	0.0	0.0	0.0	0.0	0.0	0.0	0.0	0.0	0.0
WNK1	65125	symbol	H. sapiens	65125	H. sapiens	WNK1	WNK lysine deficient protein kinase 1	GO:0033633 negative regulation of cell-cell adhesion mediated by integrin;GO:0038116 chemokine (C-C motif) ligand 21 signaling pathway;GO:0097022 lymphocyte migration into lymph node	Other	Human disease related genes:Nervous system diseases:Other nervous and sensory system diseases; Kinases; Disease related genes; Potential drug targets; Enzymes; Human disease related genes:Urinary system diseases:Kidney diseases; Predicted intracellular proteins; ENZYME proteins:Transferases	Cytosol (Supported)				1.0	1.0	1.0	0.0	1.0	0.0	0.0	1.0	0.0	0.0	0.0	1.0	0.0	1.0	0.0	0.0	1.0	0.0	1.0	1.0
C4orf32	132720	gene_synonym	H. sapiens	132720	H. sapiens	FAM241A	family with sequence similarity 241 member A				Golgi apparatus (Enhanced)				0.0	0.0	0.0	0.0	0.0	0.0	0.0	0.0	0.0	0.0	0.0	0.0	0.0	0.0	0.0	0.0	0.0	0.0	0.0	0.0
FAM107A	11170	symbol	H. sapiens	11170	H. sapiens	FAM107A	family with sequence similarity 107 member A	GO:1900272 negative regulation of long-term synaptic potentiation;GO:0051895 negative regulation of focal adhesion assembly;GO:0150118 negative regulation of cell-substrate junction organization		Predicted intracellular proteins	Nuclear speckles (Supported)				0.0	1.0	1.0	1.0	0.0	0.0	0.0	0.0	0.0	0.0	0.0	0.0	0.0	1.0	0.0	0.0	0.0	0.0	0.0	0.0
NCOA4	8031	symbol	H. sapiens	8031	H. sapiens	NCOA4	nuclear receptor coactivator 4	GO:0071394 cellular response to testosterone stimulus;GO:0071391 cellular response to estrogen stimulus;GO:0030520 intracellular estrogen receptor signaling pathway		Human disease related genes:Cancers:Cancers of endocrine organs; Predicted intracellular proteins; Cancer-related genes:Mutational cancer driver genes; Disease related genes	Nucleoli (Approved); Additional: Cytosol;Golgi apparatus		(M58)PID AR PATHWAY	(M5908)HALLMARK ANDROGEN RESPONSE; (M5945)HALLMARK HEME METABOLISM	0.0	0.0	0.0	1.0	0.0	0.0	1.0	0.0	0.0	0.0	0.0	1.0	1.0	0.0	1.0	0.0	0.0	0.0	0.0	0.0
AUH	549	symbol	H. sapiens	549	H. sapiens	AUH	AU RNA binding methylglutaconyl-CoA hydratase	GO:0006552 leucine catabolic process;GO:0006551 leucine metabolic process;GO:0009083 branched-chain amino acid catabolic process		Human disease related genes:Congenital disorders of metabolism:Congenital disorders of amino acid metabolism; ENZYME proteins:Lyases; Disease related genes; Potential drug targets; Enzymes; Predicted intracellular proteins				(M5935)HALLMARK FATTY ACID METABOLISM	0.0	0.0	0.0	0.0	0.0	0.0	0.0	0.0	0.0	0.0	0.0	0.0	0.0	0.0	0.0	0.0	0.0	0.0	0.0	0.0
IL1R1	3554	symbol	H. sapiens	3554	H. sapiens	IL1R1	interleukin 1 receptor type 1	GO:2000661 positive regulation of interleukin-1-mediated signaling pathway;GO:2000391 positive regulation of neutrophil extravasation;GO:2000389 regulation of neutrophil extravasation		CD markers; Cancer-related genes:Candidate cancer biomarkers; Human disease related genes:Immune system diseases:Allergies and autoimmune diseases; ENZYME proteins:Hydrolases; Transporters:Accessory Factors Involved in Transport; Human disease related genes:Skin diseases:Skin and soft tissue diseases; Predicted secreted proteins; FDA approved drug targets:Biotech drugs; Enzymes	Nucleoplasm;Vesicles (Approved); Additional: Cytosol;Plasma membrane	Anakinra; SD118; OMS-103HP; Foreskin fibroblast (neonatal)	(M110)PID IL1 PATHWAY; (M54)PID IL12 2PATHWAY	(M5897)HALLMARK IL6 JAK STAT3 SIGNALING; (M5932)HALLMARK INFLAMMATORY RESPONSE; (M5934)HALLMARK XENOBIOTIC METABOLISM	0.0	0.0	1.0	0.0	0.0	0.0	0.0	1.0	0.0	0.0	0.0	0.0	1.0	0.0	0.0	0.0	1.0	0.0	0.0	1.0
LINC01137	728431	gene_synonym	H. sapiens	728431	H. sapiens	ZC3H12A-DT	ZC3H12A divergent transcript								0.0	0.0	0.0	0.0	0.0	0.0	0.0	0.0	0.0	0.0	0.0	0.0	0.0	0.0	0.0	0.0	0.0	0.0	0.0	0.0
ITGA4	3676	symbol	H. sapiens	3676	H. sapiens	ITGA4	integrin subunit alpha 4	GO:0043496 regulation of protein homodimerization activity;GO:0090074 negative regulation of protein homodimerization activity;GO:1990771 clathrin-dependent extracellular exosome endocytosis		FDA approved drug targets:Biotech drugs; Predicted intracellular proteins; CD markers; Cancer-related genes:Candidate cancer biomarkers	Plasma membrane (Approved)	Natalizumab; ATL1102; CDP323; R1295; R411; Tinzaparin; Vedolizumab	(M212)PID INTEGRIN5 PATHWAY; (M274)PID LYMPH ANGIOGENESIS PATHWAY; (M47)PID INTEGRIN CS PATHWAY	(M5897)HALLMARK IL6 JAK STAT3 SIGNALING	0.0	1.0	1.0	0.0	0.0	1.0	1.0	1.0	0.0	0.0	0.0	0.0	1.0	0.0	0.0	0.0	1.0	1.0	1.0	1.0
ACKR4	51554	symbol	H. sapiens	51554	H. sapiens	ACKR4	atypical chemokine receptor 4	GO:0070098 chemokine-mediated signaling pathway;GO:1990868 response to chemokine;GO:1990869 cellular response to chemokine		G-protein coupled receptors:GPCRs excl olfactory receptors; G-protein coupled receptors:Chemokines and chemotactic factors receptors	Mitochondria;Vesicles (Approved)				0.0	0.0	0.0	0.0	0.0	0.0	0.0	0.0	0.0	0.0	0.0	1.0	0.0	0.0	0.0	0.0	1.0	1.0	0.0	0.0
LINC01550	388011	symbol	H. sapiens	388011	H. sapiens	LINC01550	long intergenic non-protein coding RNA 1550								0.0	0.0	0.0	0.0	0.0	0.0	0.0	0.0	0.0	0.0	0.0	0.0	0.0	0.0	0.0	0.0	0.0	0.0	0.0	0.0
HERC3	8916	symbol	H. sapiens	8916	H. sapiens	HERC3	HECT and RLD domain containing E3 ubiquitin protein ligase 3	GO:0016567 protein ubiquitination;GO:0032446 protein modification by small protein conjugation;GO:0070647 protein modification by small protein conjugation or removal		Enzymes; Predicted intracellular proteins; ENZYME proteins:Transferases	Cytosol (Supported, Approved)			(M5908)HALLMARK ANDROGEN RESPONSE	0.0	0.0	0.0	0.0	0.0	0.0	0.0	0.0	0.0	0.0	0.0	0.0	0.0	0.0	0.0	0.0	0.0	0.0	0.0	0.0
TUBD1	51174	symbol	H. sapiens	51174	H. sapiens	TUBD1	tubulin delta 1	GO:0045880 positive regulation of smoothened signaling pathway;GO:0008589 regulation of smoothened signaling pathway;GO:0000226 microtubule cytoskeleton organization		FDA approved drug targets:Small molecule drugs; Predicted intracellular proteins	Cytosol;Nucleoplasm (Approved)	Vinblastine		(M5893)HALLMARK MITOTIC SPINDLE	0.0	0.0	0.0	0.0	0.0	0.0	0.0	0.0	0.0	0.0	0.0	0.0	0.0	0.0	0.0	0.0	0.0	0.0	0.0	0.0
HSD17B11	51170	symbol	H. sapiens	51170	H. sapiens	HSD17B11	hydroxysteroid 17-beta dehydrogenase 11	GO:0006710 androgen catabolic process;GO:0006703 estrogen biosynthetic process;GO:0042447 hormone catabolic process		Enzymes; Predicted intracellular proteins; ENZYME proteins:Oxidoreductases	Lipid droplets (Supported)	Aetiocholanolone		(M5949)HALLMARK PEROXISOME; (M5948)HALLMARK BILE ACID METABOLISM; (M5935)HALLMARK FATTY ACID METABOLISM	0.0	0.0	0.0	0.0	0.0	0.0	0.0	0.0	1.0	0.0	0.0	0.0	0.0	0.0	0.0	0.0	0.0	0.0	0.0	0.0
EGFL6	25975	symbol	H. sapiens	25975	H. sapiens	EGFL6	EGF like domain multiple 6	GO:0010811 positive regulation of cell-substrate adhesion;GO:0010810 regulation of cell-substrate adhesion;GO:0030198 extracellular matrix organization		Predicted secreted proteins			(M5883)NABA SECRETED FACTORS; (M5885)NABA MATRISOME ASSOCIATED; (M5889)NABA MATRISOME		0.0	1.0	0.0	0.0	0.0	1.0	0.0	0.0	0.0	0.0	0.0	0.0	1.0	0.0	0.0	0.0	0.0	0.0	0.0	0.0
SETD7	80854	symbol	H. sapiens	80854	H. sapiens	SETD7	SET domain containing 7, histone lysine methyltransferase	GO:0018026 peptidyl-lysine monomethylation;GO:0018027 peptidyl-lysine dimethylation;GO:0051570 regulation of histone H3-K9 methylation		Enzymes; Predicted intracellular proteins; ENZYME proteins:Transferases	Nucleoli;Nucleoli rim (Enhanced); Additional: Mitotic chromosome	S-adenosyl-L-homocysteine	(M261)PID P53 REGULATION PATHWAY		0.0	0.0	0.0	0.0	0.0	0.0	0.0	1.0	0.0	0.0	0.0	0.0	0.0	0.0	0.0	0.0	1.0	0.0	0.0	0.0
ZNF503-AS1	253264	symbol	H. sapiens	253264	H. sapiens	ZNF503-AS1	ZNF503 antisense RNA 1								0.0	0.0	0.0	0.0	0.0	0.0	0.0	0.0	0.0	0.0	0.0	0.0	0.0	0.0	0.0	0.0	0.0	0.0	0.0	0.0
SLC6A15	55117	symbol	H. sapiens	55117	H. sapiens	SLC6A15	solute carrier family 6 member 15	GO:0015820 leucine transport;GO:0015824 proline transport;GO:0015803 branched-chain amino acid transport		Transporters:Electrochemical Potential-driven transporters; Predicted intracellular proteins	Nucleoli (Approved); Additional: Vesicles				0.0	0.0	0.0	0.0	1.0	0.0	0.0	0.0	0.0	0.0	0.0	0.0	0.0	0.0	0.0	0.0	0.0	0.0	0.0	0.0
GLIS3	169792	symbol	H. sapiens	169792	H. sapiens	GLIS3	GLIS family zinc finger 3	GO:0006366 transcription by RNA polymerase II;GO:0006351 transcription, DNA-templated;GO:0097659 nucleic acid-templated transcription		Transcription factors:Zinc-coordinating DNA-binding domains; Human disease related genes:Endocrine and metabolic diseases:Diabetes; Predicted intracellular proteins; Disease related genes	Nucleoplasm (Supported)				0.0	0.0	0.0	0.0	0.0	0.0	0.0	0.0	0.0	0.0	0.0	0.0	0.0	0.0	0.0	0.0	0.0	0.0	0.0	0.0
STRN	6801	symbol	H. sapiens	6801	H. sapiens	STRN	striatin	GO:0070830 bicellular tight junction assembly;GO:0120192 tight junction assembly;GO:0043297 apical junction assembly		Predicted intracellular proteins; Cancer-related genes	Cytosol (Approved); Additional: Nucleoplasm		(M41)PID ER NONGENOMIC PATHWAY	(M5953)HALLMARK KRAS SIGNALING UP	0.0	0.0	0.0	0.0	0.0	0.0	0.0	1.0	0.0	0.0	0.0	0.0	1.0	0.0	0.0	0.0	0.0	1.0	0.0	0.0
SVEP1	79987	symbol	H. sapiens	79987	H. sapiens	SVEP1	sushi, von Willebrand factor type A, EGF and pentraxin domain containing 1	GO:0003017 lymph circulation;GO:0048014 Tie signaling pathway;GO:0036303 lymph vessel morphogenesis		Predicted intracellular proteins			(M3008)NABA ECM GLYCOPROTEINS; (M5884)NABA CORE MATRISOME; (M5889)NABA MATRISOME		0.0	0.0	0.0	0.0	0.0	0.0	0.0	0.0	0.0	1.0	0.0	0.0	1.0	0.0	0.0	0.0	0.0	0.0	0.0	0.0
POLR3C	10623	symbol	H. sapiens	10623	H. sapiens	POLR3C	RNA polymerase III subunit C	GO:0006359 regulation of transcription by RNA polymerase III;GO:0032728 positive regulation of interferon-beta production;GO:0032648 regulation of interferon-beta production		Predicted intracellular proteins; RNA polymerase related proteins	Nucleoplasm (Enhanced)			(M5898)HALLMARK DNA REPAIR	0.0	0.0	1.0	0.0	0.0	0.0	0.0	0.0	0.0	0.0	0.0	0.0	0.0	0.0	0.0	0.0	0.0	0.0	0.0	0.0
DMKN	93099	symbol	H. sapiens	93099	H. sapiens	DMKN	dermokine	GO:1903575 cornified envelope assembly;GO:0071709 membrane assembly;GO:0044091 membrane biogenesis		Predicted secreted proteins; Predicted intracellular proteins	Cytosol;Nucleoplasm (Approved)				0.0	0.0	0.0	0.0	0.0	0.0	0.0	0.0	0.0	0.0	0.0	0.0	0.0	0.0	0.0	0.0	0.0	0.0	0.0	0.0
DCAF12	25853	symbol	H. sapiens	25853	H. sapiens	DCAF12	DDB1 and CUL4 associated factor 12	GO:0140627 ubiquitin-dependent protein catabolic process via the C-end degron rule pathway;GO:0043161 proteasome-mediated ubiquitin-dependent protein catabolic process;GO:0010506 regulation of autophagy		Predicted intracellular proteins					0.0	0.0	0.0	0.0	0.0	0.0	0.0	0.0	0.0	0.0	0.0	0.0	0.0	0.0	0.0	0.0	0.0	0.0	0.0	0.0
INPP1	3628	symbol	H. sapiens	3628	H. sapiens	INPP1	inositol polyphosphate-1-phosphatase	GO:0046838 phosphorylated carbohydrate dephosphorylation;GO:0046855 inositol phosphate dephosphorylation;GO:0071545 inositol phosphate catabolic process		Enzymes; ENZYME proteins:Hydrolases; Predicted intracellular proteins	Centriolar satellite (Approved); Additional: Cytosol				0.0	0.0	0.0	0.0	0.0	0.0	0.0	0.0	1.0	0.0	0.0	0.0	0.0	0.0	0.0	0.0	0.0	0.0	0.0	0.0
MALT1	10892	symbol	H. sapiens	10892	H. sapiens	MALT1	MALT1 paracaspase	GO:0001923 B-1 B cell differentiation;GO:2000321 positive regulation of T-helper 17 cell differentiation;GO:2000318 positive regulation of T-helper 17 type immune response		Human disease related genes:Immune system diseases:Primary immunodeficiency; Peptidases:Cysteine-type peptidases; Disease related genes; Potential drug targets; Enzymes; Predicted intracellular proteins; Cancer-related genes	Nucleoli fibrillar center (Approved); Additional: Cytosol		(M37)PID NFKAPPAB CANONICAL PATHWAY; (M88)PID CD8 TCR PATHWAY; (M10)PID BCR 5PATHWAY		1.0	1.0	0.0	1.0	0.0	0.0	0.0	1.0	0.0	0.0	0.0	0.0	0.0	0.0	0.0	0.0	0.0	0.0	0.0	0.0
SLC11A2	4891	symbol	H. sapiens	4891	H. sapiens	SLC11A2	solute carrier family 11 member 2	GO:0015692 lead ion transport;GO:0015675 nickel cation transport;GO:0035444 nickel cation transmembrane transport		Human disease related genes:Cardiovascular diseases:Hematologic diseases; Disease related genes; Potential drug targets; Transporters:Electrochemical Potential-driven transporters; Predicted intracellular proteins	Mitochondria (Supported)	Ferric maltol	(M44)PID HIF2PATHWAY	(M5932)HALLMARK INFLAMMATORY RESPONSE; (M5945)HALLMARK HEME METABOLISM	0.0	0.0	0.0	0.0	1.0	1.0	1.0	0.0	0.0	0.0	0.0	1.0	0.0	0.0	0.0	0.0	0.0	1.0	0.0	0.0
AQP9	366	symbol	H. sapiens	366	H. sapiens	AQP9	aquaporin 9	GO:0015722 canalicular bile acid transport;GO:1904823 purine nucleobase transmembrane transport;GO:0015855 pyrimidine nucleobase transport		Transporters:Transporter channels and pores				(M5948)HALLMARK BILE ACID METABOLISM; (M5932)HALLMARK INFLAMMATORY RESPONSE; (M5934)HALLMARK XENOBIOTIC METABOLISM	0.0	0.0	0.0	1.0	1.0	0.0	0.0	0.0	0.0	0.0	0.0	0.0	0.0	0.0	0.0	0.0	0.0	0.0	0.0	0.0
FAR1	84188	symbol	H. sapiens	84188	H. sapiens	FAR1	fatty acyl-CoA reductase 1	GO:0010025 wax biosynthetic process;GO:0010166 wax metabolic process;GO:0008611 ether lipid biosynthetic process		ENZYME proteins:Oxidoreductases; Human disease related genes:Congenital malformations:Congenital malformations of the musculoskeletal system; Disease related genes; Potential drug targets; Enzymes; Human disease related genes:Congenital disorders of metabolism:Peroxisomal diseases; Predicted intracellular proteins	Peroxisomes (Supported)				0.0	0.0	0.0	0.0	0.0	0.0	0.0	0.0	1.0	0.0	0.0	0.0	0.0	0.0	0.0	0.0	0.0	0.0	0.0	0.0
TDRD10	126668	symbol	H. sapiens	126668	H. sapiens	TDRD10	tudor domain containing 10	GO:0007314 oocyte anterior/posterior axis specification;GO:0007315 pole plasm assembly;GO:0008358 maternal determination of anterior/posterior axis, embryo		Predicted intracellular proteins; Cancer-related genes:Mutated cancer genes	Vesicles (Approved)				0.0	0.0	0.0	0.0	0.0	0.0	0.0	0.0	0.0	0.0	0.0	0.0	0.0	0.0	0.0	0.0	0.0	0.0	0.0	0.0
ZC3H7A	29066	symbol	H. sapiens	29066	H. sapiens	ZC3H7A	zinc finger CCCH-type containing 7A	GO:0035196 production of miRNAs involved in gene silencing by miRNA;GO:0031050 dsRNA processing;GO:0070918 production of small RNA involved in gene silencing by RNA		Predicted intracellular proteins	Cytosol (Supported)				0.0	0.0	0.0	0.0	0.0	0.0	0.0	0.0	0.0	0.0	0.0	0.0	0.0	0.0	0.0	0.0	0.0	0.0	0.0	0.0
MAN1C1	57134	symbol	H. sapiens	57134	H. sapiens	MAN1C1	mannosidase alpha class 1C member 1	GO:1904381 Golgi apparatus mannose trimming;GO:0036507 protein demannosylation;GO:0036508 protein alpha-1,2-demannosylation		Enzymes; ENZYME proteins:Hydrolases; Predicted intracellular proteins	Nucleoplasm;Vesicles (Uncertain)				0.0	0.0	0.0	0.0	0.0	0.0	0.0	0.0	0.0	0.0	0.0	0.0	0.0	0.0	0.0	0.0	0.0	0.0	0.0	0.0
PCNXL4	64430	gene_synonym	H. sapiens	64430	H. sapiens	PCNX4	pecanex 4			Predicted intracellular proteins	Cytosol (Approved)				0.0	0.0	0.0	0.0	0.0	0.0	0.0	0.0	0.0	0.0	0.0	0.0	0.0	0.0	0.0	0.0	0.0	0.0	0.0	0.0
RAP1A	5906	symbol	H. sapiens	5906	H. sapiens	RAP1A	RAP1A, member of RAS oncogene family	GO:2000301 negative regulation of synaptic vesicle exocytosis;GO:0098696 regulation of neurotransmitter receptor localization to postsynaptic specialization membrane;GO:0046929 negative regulation of neurotransmitter secretion		Enzymes; ENZYME proteins:Hydrolases; RAS pathway related proteins; Predicted intracellular proteins			(M69)PID REELIN PATHWAY; (M72)PID NECTIN PATHWAY; (M233)PID EPO PATHWAY		1.0	0.0	0.0	1.0	0.0	0.0	0.0	1.0	0.0	0.0	1.0	0.0	1.0	0.0	0.0	1.0	0.0	0.0	1.0	0.0
ZHX3	23051	symbol	H. sapiens	23051	H. sapiens	ZHX3	zinc fingers and homeoboxes 3	GO:0045669 positive regulation of osteoblast differentiation;GO:0045667 regulation of osteoblast differentiation;GO:0045597 positive regulation of cell differentiation		Transcription factors:Helix-turn-helix domains; Predicted intracellular proteins	Nucleoplasm (Supported)				0.0	0.0	0.0	0.0	0.0	0.0	0.0	0.0	0.0	0.0	0.0	0.0	0.0	0.0	0.0	0.0	0.0	0.0	0.0	0.0
MMD	23531	symbol	H. sapiens	23531	H. sapiens	MMD	monocyte to macrophage differentiation associated	GO:0019835 cytolysis;GO:0045666 positive regulation of neuron differentiation;GO:0045664 regulation of neuron differentiation		Transporters:Transporter channels and pores	Vesicles (Approved)			(M5953)HALLMARK KRAS SIGNALING UP	1.0	0.0	0.0	0.0	0.0	0.0	0.0	0.0	0.0	0.0	0.0	0.0	0.0	0.0	0.0	0.0	0.0	0.0	0.0	0.0
SOAT1	6646	symbol	H. sapiens	6646	H. sapiens	SOAT1	sterol O-acyltransferase 1	GO:0010878 cholesterol storage;GO:0034433 steroid esterification;GO:0034434 sterol esterification		Enzymes; FDA approved drug targets:Small molecule drugs; ENZYME proteins:Transferases	Endoplasmic reticulum (Enhanced)	Ezetimibe; Hesperetin			0.0	0.0	0.0	0.0	1.0	0.0	0.0	0.0	1.0	0.0	0.0	0.0	0.0	0.0	0.0	0.0	0.0	0.0	0.0	0.0
USP12	219333	symbol	H. sapiens	219333	H. sapiens	USP12	ubiquitin specific peptidase 12	GO:0016579 protein deubiquitination;GO:0070646 protein modification by small protein removal;GO:0006511 ubiquitin-dependent protein catabolic process		Enzymes; ENZYME proteins:Hydrolases; Predicted intracellular proteins; Peptidases:Cysteine-type peptidases	Nucleoplasm (Approved)			(M5953)HALLMARK KRAS SIGNALING UP	0.0	0.0	0.0	0.0	0.0	0.0	0.0	0.0	0.0	0.0	0.0	0.0	0.0	0.0	0.0	0.0	0.0	0.0	0.0	0.0
CHI3L2	1117	symbol	H. sapiens	1117	H. sapiens	CHI3L2	chitinase 3 like 2	GO:0006030 chitin metabolic process;GO:0006032 chitin catabolic process;GO:1901072 glucosamine-containing compound catabolic process		Predicted secreted proteins; Predicted intracellular proteins					0.0	0.0	0.0	0.0	0.0	0.0	0.0	0.0	0.0	0.0	0.0	0.0	0.0	0.0	0.0	0.0	0.0	0.0	0.0	0.0
ADPGK	83440	symbol	H. sapiens	83440	H. sapiens	ADPGK	ADP dependent glucokinase	GO:0061615 glycolytic process through fructose-6-phosphate;GO:0061620 glycolytic process through glucose-6-phosphate;GO:0006096 glycolytic process		Enzymes; Predicted intracellular proteins; ENZYME proteins:Transferases	Centrosome (Approved)				0.0	0.0	0.0	0.0	0.0	0.0	0.0	0.0	0.0	0.0	0.0	0.0	0.0	0.0	0.0	0.0	0.0	0.0	0.0	0.0
ANXA7	310	symbol	H. sapiens	310	H. sapiens	ANXA7	annexin A7	GO:0006914 autophagy;GO:0061919 process utilizing autophagic mechanism;GO:0030855 epithelial cell differentiation		Predicted intracellular proteins; Cancer-related genes:Candidate cancer biomarkers	Nucleoplasm (Uncertain); Additional: Cytosol		(M5880)NABA ECM AFFILIATED; (M5885)NABA MATRISOME ASSOCIATED; (M5889)NABA MATRISOME		0.0	0.0	0.0	0.0	0.0	1.0	0.0	0.0	0.0	0.0	0.0	0.0	0.0	0.0	0.0	0.0	0.0	0.0	0.0	0.0
NIPA2	81614	symbol	H. sapiens	81614	H. sapiens	NIPA2	NIPA magnesium transporter 2	GO:1903830 magnesium ion transmembrane transport;GO:0015693 magnesium ion transport;GO:0098662 inorganic cation transmembrane transport		Transporters:Electrochemical Potential-driven transporters	Golgi apparatus (Approved)				0.0	0.0	0.0	0.0	1.0	0.0	0.0	0.0	0.0	0.0	0.0	0.0	0.0	0.0	0.0	0.0	0.0	0.0	0.0	0.0
PKIA	5569	symbol	H. sapiens	5569	H. sapiens	PKIA	cAMP-dependent protein kinase inhibitor alpha	GO:2000480 negative regulation of cAMP-dependent protein kinase activity;GO:0042308 negative regulation of protein import into nucleus;GO:1904590 negative regulation of protein import		Predicted intracellular proteins		3,5-Diiodotyrosine; Hydroxyfasudil; (2S)-1-(3H-Indol-3-yl)-3-{[5-(6-isoquinolinyl)-3-pyridinyl]oxy}-2-propanamine; (1S)-2-(1H-INDOL-3-YL)-1-[({5-[(E)-2-PYRIDIN-4-YLVINYL]PYRIDIN-3-YL}OXY)METHYL]ETHYLAMINE; (1S)-1-(1H-INDOL-3-YLMETHYL)-2-(2-PYRIDIN-4-YL-[1,7]NAPHTYRIDIN-5-YLOXY)-EHYLAMINE; (4R,2S)-5'-(4-(4-CHLOROBENZYLOXY)PYRROLIDIN-2-YLMETHANESULFONYL)ISOQUINOLINE; N-METHYL-1-[4-(9H-PURIN-6-YL)PH…		(M5909)HALLMARK MYOGENESIS	1.0	0.0	0.0	0.0	0.0	0.0	0.0	1.0	0.0	0.0	0.0	0.0	0.0	0.0	0.0	0.0	0.0	0.0	0.0	0.0
MSC-AS1	100132891	symbol	H. sapiens	100132891	H. sapiens	MSC-AS1	MSC antisense RNA 1								0.0	0.0	0.0	0.0	0.0	0.0	0.0	0.0	0.0	0.0	0.0	0.0	0.0	0.0	0.0	0.0	0.0	0.0	0.0	0.0
CLK4	57396	symbol	H. sapiens	57396	H. sapiens	CLK4	CDC like kinase 4	GO:0018108 peptidyl-tyrosine phosphorylation;GO:0018212 peptidyl-tyrosine modification;GO:0043484 regulation of RNA splicing	CMGC Ser/Thr protein kinase family	Enzymes; Kinases:CMGC Ser/Thr protein kinases; Predicted intracellular proteins; ENZYME proteins:Transferases	Actin filaments (Approved)	Fostamatinib			0.0	0.0	0.0	0.0	0.0	0.0	0.0	0.0	0.0	0.0	0.0	0.0	0.0	0.0	0.0	0.0	0.0	0.0	0.0	0.0
MOXD1	26002	symbol	H. sapiens	26002	H. sapiens	MOXD1	monooxygenase DBH like 1	GO:0006589 octopamine biosynthetic process;GO:0046333 octopamine metabolic process;GO:0042439 ethanolamine-containing compound metabolic process		Predicted intracellular proteins	Cytosol (Approved)				0.0	0.0	0.0	0.0	0.0	0.0	0.0	0.0	1.0	0.0	0.0	0.0	0.0	0.0	0.0	0.0	0.0	0.0	0.0	0.0
KY	339855	symbol	H. sapiens	339855	H. sapiens	KY	kyphoscoliosis peptidase	GO:0006508 proteolysis;GO:0019538 protein metabolic process;GO:1901564 organonitrogen compound metabolic process		Predicted intracellular proteins; Human disease related genes:Musculoskeletal diseases:Muscular diseases; Disease related genes	Nucleoplasm (Approved)		(M3468)NABA ECM REGULATORS; (M5885)NABA MATRISOME ASSOCIATED; (M5889)NABA MATRISOME		0.0	0.0	0.0	0.0	0.0	1.0	0.0	0.0	0.0	0.0	0.0	0.0	0.0	0.0	0.0	0.0	0.0	0.0	0.0	0.0
LINC01279	151887	gene_synonym	H. sapiens	151887	H. sapiens	CCDC80	coiled-coil domain containing 80	GO:0010811 positive regulation of cell-substrate adhesion;GO:0010810 regulation of cell-substrate adhesion;GO:0030198 extracellular matrix organization		Predicted secreted proteins; Predicted intracellular proteins					0.0	1.0	0.0	0.0	0.0	1.0	0.0	0.0	0.0	0.0	0.0	0.0	0.0	0.0	0.0	0.0	0.0	0.0	0.0	0.0
SRGAP1	57522	symbol	H. sapiens	57522	H. sapiens	SRGAP1	SLIT-ROBO Rho GTPase activating protein 1	GO:0030336 negative regulation of cell migration;GO:2000146 negative regulation of cell motility;GO:0051271 negative regulation of cellular component movement		Predicted intracellular proteins; Disease related genes	Cytosol (Approved)		(M68)PID RHOA REG PATHWAY		0.0	0.0	0.0	0.0	0.0	0.0	0.0	0.0	0.0	0.0	0.0	0.0	0.0	0.0	0.0	0.0	0.0	1.0	0.0	0.0
CCDC80	151887	symbol	H. sapiens	151887	H. sapiens	CCDC80	coiled-coil domain containing 80	GO:0010811 positive regulation of cell-substrate adhesion;GO:0010810 regulation of cell-substrate adhesion;GO:0030198 extracellular matrix organization		Predicted secreted proteins; Predicted intracellular proteins					0.0	1.0	0.0	0.0	0.0	1.0	0.0	0.0	0.0	0.0	0.0	0.0	0.0	0.0	0.0	0.0	0.0	0.0	0.0	0.0
FBXW7	55294	symbol	H. sapiens	55294	H. sapiens	FBXW7	F-box and WD repeat domain containing 7	GO:1903378 positive regulation of oxidative stress-induced neuron intrinsic apoptotic signaling pathway;GO:2000639 negative regulation of SREBP signaling pathway;GO:2000346 negative regulation of hepatocyte proliferation		Predicted intracellular proteins; Cancer-related genes:Mutational cancer driver genes; Cancer-related genes:Mutated cancer genes	Nucleoplasm;Vesicles (Supported)		(M139)PID MYC PATHWAY; (M236)PID DELTA NP63 PATHWAY; (M17)PID NOTCH PATHWAY	(M5939)HALLMARK P53 PATHWAY	1.0	0.0	0.0	0.0	0.0	0.0	0.0	0.0	0.0	1.0	0.0	0.0	1.0	1.0	0.0	0.0	0.0	0.0	0.0	0.0
VPS35	55737	symbol	H. sapiens	55737	H. sapiens	VPS35	VPS35 retromer complex component	GO:0032460 negative regulation of protein oligomerization;GO:0032463 negative regulation of protein homooligomerization;GO:0090326 positive regulation of locomotion involved in locomotory behavior		Transporters; Disease related genes; Potential drug targets; Human disease related genes:Nervous system diseases:Neurodegenerative diseases; Predicted intracellular proteins	Endosomes;Lysosomes (Supported)				0.0	0.0	1.0	0.0	0.0	0.0	0.0	0.0	0.0	0.0	0.0	0.0	0.0	0.0	0.0	0.0	0.0	0.0	0.0	0.0
ABCA6	23460	symbol	H. sapiens	23460	H. sapiens	ABCA6	ATP binding cassette subfamily A member 6	GO:0006869 lipid transport;GO:0010876 lipid localization;GO:0055085 transmembrane transport		Transporters:Primary Active Transporters; Predicted intracellular proteins	Nucleoplasm (Enhanced)			(M5948)HALLMARK BILE ACID METABOLISM	0.0	0.0	0.0	0.0	1.0	0.0	0.0	0.0	0.0	0.0	0.0	0.0	0.0	0.0	0.0	0.0	0.0	0.0	0.0	0.0
CYGB	114757	symbol	H. sapiens	114757	H. sapiens	CYGB	cytoglobin	GO:2000490 negative regulation of hepatic stellate cell activation;GO:2000489 regulation of hepatic stellate cell activation;GO:0010764 negative regulation of fibroblast migration		Transporters:Transporter channels and pores; Predicted intracellular proteins	Nuclear speckles (Supported); Additional: Cytosol				0.0	1.0	0.0	0.0	1.0	0.0	0.0	0.0	0.0	0.0	0.0	0.0	0.0	1.0	0.0	0.0	0.0	0.0	0.0	0.0
IL1RL2	8808	symbol	H. sapiens	8808	H. sapiens	IL1RL2	interleukin 1 receptor like 2	GO:0070498 interleukin-1-mediated signaling pathway;GO:0006968 cellular defense response;GO:0045582 positive regulation of T cell differentiation		Enzymes; ENZYME proteins:Hydrolases; Predicted intracellular proteins				(M5953)HALLMARK KRAS SIGNALING UP	0.0	1.0	0.0	0.0	0.0	0.0	0.0	0.0	0.0	0.0	0.0	0.0	0.0	0.0	0.0	0.0	1.0	0.0	0.0	0.0
STX18	53407	symbol	H. sapiens	53407	H. sapiens	STX18	syntaxin 18	GO:1902953 positive regulation of ER to Golgi vesicle-mediated transport;GO:0090158 endoplasmic reticulum membrane organization;GO:0060628 regulation of ER to Golgi vesicle-mediated transport		Predicted intracellular proteins	Endoplasmic reticulum;Plasma membrane (Supported)				0.0	0.0	0.0	0.0	0.0	0.0	0.0	0.0	0.0	0.0	0.0	0.0	0.0	0.0	0.0	0.0	0.0	0.0	0.0	0.0
ARIH2	10425	symbol	H. sapiens	10425	H. sapiens	ARIH2	ariadne RBR E3 ubiquitin protein ligase 2	GO:0071425 hematopoietic stem cell proliferation;GO:0072089 stem cell proliferation;GO:1903955 positive regulation of protein targeting to mitochondrion		Enzymes; Predicted intracellular proteins; ENZYME proteins:Transferases	Nucleoplasm (Enhanced)				0.0	0.0	0.0	0.0	0.0	0.0	0.0	0.0	0.0	0.0	0.0	0.0	0.0	0.0	0.0	0.0	0.0	0.0	0.0	0.0
RPP14	11102	symbol	H. sapiens	11102	H. sapiens	RPP14	ribonuclease P/MRP subunit p14	GO:0001682 tRNA 5'-leader removal;GO:0099116 tRNA 5'-end processing;GO:0034471 ncRNA 5'-end processing		Enzymes; ENZYME proteins:Hydrolases; Predicted intracellular proteins	Cytosol;Nucleoplasm (Approved)				0.0	0.0	0.0	0.0	0.0	0.0	0.0	0.0	0.0	0.0	0.0	0.0	0.0	0.0	0.0	0.0	0.0	0.0	0.0	0.0
FAM126A	84668	symbol	H. sapiens	84668	H. sapiens	FAM126A	family with sequence similarity 126 member A	GO:0046854 phosphatidylinositol phosphate biosynthetic process;GO:0042552 myelination;GO:0007272 ensheathment of neurons		Human disease related genes:Congenital disorders of metabolism:Congenital disorders of lipid/glycolipid metabolism; Predicted intracellular proteins; Disease related genes	Cytosol;Plasma membrane (Supported)				0.0	0.0	0.0	0.0	0.0	0.0	0.0	0.0	1.0	0.0	0.0	0.0	0.0	0.0	0.0	0.0	0.0	0.0	0.0	0.0
LINC00595	414243	symbol	H. sapiens	414243	H. sapiens	LINC00595	long intergenic non-protein coding RNA 595								0.0	0.0	0.0	0.0	0.0	0.0	0.0	0.0	0.0	0.0	0.0	0.0	0.0	0.0	0.0	0.0	0.0	0.0	0.0	0.0
CACNB2	783	symbol	H. sapiens	783	H. sapiens	CACNB2	calcium voltage-gated channel auxiliary subunit beta 2	GO:0098912 membrane depolarization during atrial cardiac muscle cell action potential;GO:0099533 positive regulation of presynaptic cytosolic calcium concentration;GO:0099703 induction of synaptic vesicle exocytosis by positive regulation of presynaptic cytosolic calcium ion concentration		FDA approved drug targets:Small molecule drugs; Transporters:Accessory Factors Involved in Transport; Human disease related genes:Cardiovascular diseases:Cardiac diseases; Disease related genes; Predicted intracellular proteins		Isradipine; Nimodipine; Nisoldipine; Nicardipine; Felodipine; Nitrendipine; Nifedipine; Mibefradil; Dronedarone; Nilvadipine			0.0	0.0	0.0	0.0	0.0	0.0	0.0	0.0	0.0	0.0	0.0	1.0	1.0	0.0	0.0	0.0	0.0	1.0	0.0	0.0
ZC2HC1A	51101	symbol	H. sapiens	51101	H. sapiens	ZC2HC1A	zinc finger C2HC-type containing 1A			Predicted intracellular proteins	Cytosol (Approved); Additional: Actin filaments				0.0	0.0	0.0	0.0	0.0	0.0	0.0	0.0	0.0	0.0	0.0	0.0	0.0	0.0	0.0	0.0	0.0	0.0	0.0	0.0
RFTN2	130132	symbol	H. sapiens	130132	H. sapiens	RFTN2	raftlin family member 2	GO:0033227 dsRNA transport;GO:0043330 response to exogenous dsRNA;GO:0043331 response to dsRNA		Predicted intracellular proteins	Plasma membrane (Approved)				0.0	0.0	0.0	0.0	0.0	0.0	0.0	0.0	0.0	0.0	0.0	0.0	0.0	0.0	0.0	0.0	0.0	0.0	0.0	0.0
CD55	1604	symbol	H. sapiens	1604	H. sapiens	CD55	CD55 molecule (Cromer blood group)	GO:2000563 positive regulation of CD4-positive, alpha-beta T cell proliferation;GO:0045959 negative regulation of complement activation, classical pathway;GO:1903659 regulation of complement-dependent cytotoxicity		Human disease related genes:Immune system diseases:Primary immunodeficiency; CD markers; Predicted secreted proteins; Disease related genes; Blood group antigen proteins; Predicted intracellular proteins		Chloramphenicol		(M5921)HALLMARK COMPLEMENT; (M5932)HALLMARK INFLAMMATORY RESPONSE	0.0	1.0	0.0	0.0	0.0	0.0	0.0	0.0	0.0	0.0	0.0	1.0	0.0	1.0	0.0	0.0	0.0	0.0	0.0	0.0
GRIA3	2892	symbol	H. sapiens	2892	H. sapiens	GRIA3	glutamate ionotropic receptor AMPA type subunit 3	GO:0035235 ionotropic glutamate receptor signaling pathway;GO:0007215 glutamate receptor signaling pathway;GO:0060078 regulation of postsynaptic membrane potential		Human disease related genes:Other diseases:Mental and behavioural disorders; Disease related genes; Potential drug targets; Transporters:Transporter channels and pores; Predicted intracellular proteins		Glutamic acid; Butabarbital; Ethanol; Lithium cation; Aniracetam; Talampanel; CX717; Fluciclovine (18F); Lithium citrate; Lithium succinate; Lithium carbonate			0.0	0.0	0.0	0.0	0.0	0.0	0.0	1.0	0.0	0.0	0.0	0.0	0.0	0.0	0.0	0.0	0.0	0.0	0.0	0.0
TMBIM4	51643	symbol	H. sapiens	51643	H. sapiens	TMBIM4	transmembrane BAX inhibitor motif containing 4	GO:0050848 regulation of calcium-mediated signaling;GO:0043066 negative regulation of apoptotic process;GO:0006915 apoptotic process		Transporters:Transporter channels and pores; Predicted intracellular proteins	Golgi apparatus (Supported)				0.0	0.0	0.0	0.0	0.0	0.0	0.0	0.0	0.0	0.0	0.0	0.0	0.0	0.0	0.0	0.0	0.0	0.0	0.0	0.0
GPRC5B	51704	symbol	H. sapiens	51704	H. sapiens	GPRC5B	G protein-coupled receptor class C group 5 member B	GO:0060907 positive regulation of macrophage cytokine production;GO:0010935 regulation of macrophage cytokine production;GO:0061081 positive regulation of myeloid leukocyte cytokine production involved in immune response		G-protein coupled receptors:GPCRs excl olfactory receptors; G-protein coupled receptors:Family 3 (C) receptors; Predicted intracellular proteins	Vesicles (Supported); Additional: Nucleoli;Nucleoplasm			(M5953)HALLMARK KRAS SIGNALING UP	1.0	0.0	1.0	0.0	0.0	0.0	0.0	0.0	0.0	0.0	0.0	0.0	0.0	0.0	0.0	0.0	0.0	0.0	0.0	0.0
RNF157	114804	symbol	H. sapiens	114804	H. sapiens	RNF157	ring finger protein 157	GO:0043951 negative regulation of cAMP-mediated signaling;GO:1903861 positive regulation of dendrite extension;GO:1903859 regulation of dendrite extension		Enzymes; Predicted intracellular proteins; ENZYME proteins:Transferases	Golgi apparatus (Approved); Additional: Vesicles				0.0	0.0	0.0	0.0	0.0	0.0	0.0	0.0	0.0	0.0	0.0	0.0	0.0	0.0	0.0	0.0	0.0	0.0	0.0	0.0
MAPK9	5601	symbol	H. sapiens	5601	H. sapiens	MAPK9	mitogen-activated protein kinase 9	GO:0061833 protein localization to tricellular tight junction;GO:1901483 regulation of transcription factor catabolic process;GO:1901485 positive regulation of transcription factor catabolic process	CMGC Ser/Thr protein kinase family	Kinases:CMGC Ser/Thr protein kinases; Enzymes; RAS pathway related proteins; Predicted intracellular proteins; ENZYME proteins:Transferases	Cytosol;Plasma membrane (Approved); Additional: Nuclear speckles	N-{3-[5-(1H-1,2,4-triazol-3-yl)-1H-indazol-3-yl]phenyl}furan-2-carboxamide; Fostamatinib	(M45)PID CD40 PATHWAY; (M193)PID NEPHRIN NEPH1 PATHWAY; (M23)PID WNT NONCANONICAL PATHWAY	(M5923)HALLMARK PI3K AKT MTOR SIGNALING	0.0	0.0	0.0	0.0	0.0	1.0	0.0	1.0	0.0	0.0	0.0	0.0	1.0	0.0	0.0	0.0	1.0	0.0	0.0	0.0
GNG2	54331	symbol	H. sapiens	54331	H. sapiens	GNG2	G protein subunit gamma 2	GO:0007191 adenylate cyclase-activating dopamine receptor signaling pathway;GO:0071380 cellular response to prostaglandin E stimulus;GO:0071379 cellular response to prostaglandin stimulus		RAS pathway related proteins; Predicted intracellular proteins	Plasma membrane (Approved); Additional: Vesicles	Halothane	(M138)PID THROMBIN PAR4 PATHWAY; (M252)PID IL8 CXCR1 PATHWAY; (M213)PID AR NONGENOMIC PATHWAY	(M5921)HALLMARK COMPLEMENT	0.0	0.0	0.0	1.0	1.0	0.0	0.0	1.0	0.0	0.0	0.0	0.0	1.0	0.0	0.0	1.0	0.0	0.0	1.0	0.0
ABCA1	19	symbol	H. sapiens	19	H. sapiens	ABCA1	ATP binding cassette subfamily A member 1	GO:0090108 positive regulation of high-density lipoprotein particle assembly;GO:0090107 regulation of high-density lipoprotein particle assembly;GO:0099039 sphingolipid translocation		Human disease related genes:Cardiovascular diseases:Vascular diseases; FDA approved drug targets:Small molecule drugs; ENZYME proteins; Human disease related genes:Congenital disorders of metabolism:Congenital disorders of lipid/glycolipid metabolism; Disease related genes; Enzymes; Transporters:Primary Active Transporters; Predicted intracellular proteins	Nucleoplasm;Vesicles (Approved)	ATP; Glyburide; Probucol	(M162)PID RXR VDR PATHWAY	(M5910)HALLMARK PROTEIN SECRETION; (M5948)HALLMARK BILE ACID METABOLISM; (M5890)HALLMARK TNFA SIGNALING VIA NFKB	0.0	0.0	0.0	1.0	1.0	0.0	0.0	0.0	1.0	0.0	0.0	0.0	0.0	0.0	0.0	0.0	0.0	0.0	0.0	0.0
CYP39A1	51302	symbol	H. sapiens	51302	H. sapiens	CYP39A1	cytochrome P450 family 39 subfamily A member 1	GO:0006707 cholesterol catabolic process;GO:0016127 sterol catabolic process;GO:0006699 bile acid biosynthetic process		Enzymes; ENZYME proteins:Oxidoreductases				(M5948)HALLMARK BILE ACID METABOLISM; (M5956)HALLMARK KRAS SIGNALING DN	0.0	0.0	0.0	0.0	0.0	0.0	0.0	0.0	1.0	0.0	0.0	0.0	0.0	0.0	0.0	0.0	0.0	0.0	0.0	0.0
NLRP1	22861	symbol	H. sapiens	22861	H. sapiens	NLRP1	NLR family pyrin domain containing 1	GO:1904784 NLRP1 inflammasome complex assembly;GO:0140632 inflammasome complex assembly;GO:0097264 self proteolysis		Human disease related genes:Skin diseases:Skin and soft tissue diseases; Predicted intracellular proteins; Disease related genes	Cytosol;Nucleoplasm (Supported)		(M267)PID ANTHRAX PATHWAY		0.0	0.0	1.0	0.0	0.0	0.0	0.0	0.0	0.0	0.0	0.0	0.0	0.0	0.0	0.0	0.0	0.0	0.0	0.0	0.0
IL6R	3570	symbol	H. sapiens	3570	H. sapiens	IL6R	interleukin 6 receptor	GO:0002384 hepatic immune response;GO:0038154 interleukin-11-mediated signaling pathway;GO:0070120 ciliary neurotrophic factor-mediated signaling pathway		Candidate cardiovascular disease genes; CD markers; Cancer-related genes:Candidate cancer biomarkers; Predicted secreted proteins; FDA approved drug targets:Biotech drugs; Predicted intracellular proteins		Tocilizumab; Sarilumab	(M11736)SA MMP CYTOKINE CONNECTION; (M183)PID IL6 7 PATHWAY; (M100)PID SHP2 PATHWAY		1.0	0.0	1.0	0.0	0.0	0.0	0.0	1.0	0.0	0.0	0.0	0.0	1.0	0.0	0.0	1.0	1.0	1.0	0.0	1.0
TNFAIP2	7127	symbol	H. sapiens	7127	H. sapiens	TNFAIP2	TNF alpha induced protein 2	GO:0051601 exocyst localization;GO:0031503 protein-containing complex localization;GO:0006887 exocytosis		Transporters:Transporter channels and pores; Predicted intracellular proteins; Cancer-related genes:Candidate cancer biomarkers	Cytosol;Golgi apparatus (Approved); Additional: Nuclear membrane;Nucleoplasm			(M5890)HALLMARK TNFA SIGNALING VIA NFKB; (M5913)HALLMARK INTERFERON GAMMA RESPONSE	0.0	0.0	0.0	0.0	0.0	0.0	0.0	0.0	0.0	1.0	0.0	0.0	0.0	0.0	0.0	0.0	0.0	0.0	0.0	0.0
TPTEP1	387590	symbol	H. sapiens	387590	H. sapiens	TPTEP1	TPTE pseudogene 1								0.0	0.0	0.0	0.0	0.0	0.0	0.0	0.0	0.0	0.0	0.0	0.0	0.0	0.0	0.0	0.0	0.0	0.0	0.0	0.0
SBSN	374897	symbol	H. sapiens	374897	H. sapiens	SBSN	suprabasin	GO:0008150 biological_process		Predicted secreted proteins; Predicted intracellular proteins	Vesicles (Approved)				0.0	0.0	0.0	0.0	0.0	0.0	0.0	0.0	0.0	0.0	0.0	0.0	0.0	0.0	0.0	0.0	0.0	0.0	0.0	0.0
TRPA1	8989	symbol	H. sapiens	8989	H. sapiens	TRPA1	transient receptor potential cation channel subfamily A member 1	GO:0050968 detection of chemical stimulus involved in sensory perception of pain;GO:0050955 thermoception;GO:0050966 detection of mechanical stimulus involved in sensory perception of pain		FDA approved drug targets:Small molecule drugs; Voltage-gated ion channels:Transient Receptor Potential Channels; Disease related genes; Transporters:Transporter channels and pores; Human disease related genes:Musculoskeletal diseases:Other musculoskeletal diseases		Levomenthol; Camphor; Cannabidiol; Butamben; (S)-camphor; Tetrahydrocannabivarin; Medical Cannabis; Nabiximols; Cannabidivarin			0.0	0.0	0.0	0.0	1.0	0.0	0.0	1.0	0.0	0.0	0.0	1.0	0.0	0.0	0.0	0.0	0.0	0.0	0.0	0.0
DNAH5	1767	symbol	H. sapiens	1767	H. sapiens	DNAH5	dynein axonemal heavy chain 5	GO:0021670 lateral ventricle development;GO:0036158 outer dynein arm assembly;GO:0021591 ventricular system development		Predicted intracellular proteins; Human disease related genes:Respiratory diseases:Tracheobronchial diseases; Disease related genes					0.0	0.0	0.0	0.0	0.0	0.0	0.0	0.0	0.0	1.0	0.0	0.0	0.0	0.0	0.0	0.0	0.0	0.0	0.0	0.0
HOXC8	3224	symbol	H. sapiens	3224	H. sapiens	HOXC8	homeobox C8	GO:0009952 anterior/posterior pattern specification;GO:0048705 skeletal system morphogenesis;GO:0003002 regionalization		Transcription factors:Helix-turn-helix domains; Predicted intracellular proteins	Nucleoplasm (Supported); Additional: Microtubules				0.0	0.0	0.0	0.0	0.0	0.0	0.0	0.0	0.0	0.0	0.0	0.0	0.0	0.0	0.0	0.0	0.0	0.0	0.0	0.0
SYNJ1	8867	symbol	H. sapiens	8867	H. sapiens	SYNJ1	synaptojanin 1	GO:1904980 positive regulation of endosome organization;GO:1904978 regulation of endosome organization;GO:0016191 synaptic vesicle uncoating		Human disease related genes:Nervous system diseases:Epilepsy; ENZYME proteins:Hydrolases; Predicted intracellular proteins; Disease related genes; Potential drug targets; Enzymes; Human disease related genes:Nervous system diseases:Neurodegenerative diseases	Cytosol;Nucleoplasm (Approved); Additional: Centrosome		(M62)PID EPHB FWD PATHWAY; (M214)PID ERBB1 INTERNALIZATION PATHWAY	(M5945)HALLMARK HEME METABOLISM	0.0	0.0	0.0	0.0	0.0	0.0	0.0	1.0	1.0	0.0	0.0	0.0	0.0	0.0	0.0	0.0	1.0	1.0	0.0	0.0
UST	10090	symbol	H. sapiens	10090	H. sapiens	UST	uronyl 2-sulfotransferase	GO:0030208 dermatan sulfate biosynthetic process;GO:0030205 dermatan sulfate metabolic process;GO:0006477 protein sulfation							0.0	0.0	0.0	0.0	0.0	0.0	0.0	0.0	0.0	0.0	0.0	0.0	0.0	0.0	0.0	0.0	0.0	0.0	0.0	0.0
TRPC3	7222	symbol	H. sapiens	7222	H. sapiens	TRPC3	transient receptor potential cation channel subfamily C member 3	GO:0010615 positive regulation of cardiac muscle adaptation;GO:1903244 positive regulation of cardiac muscle hypertrophy in response to stress;GO:0014744 positive regulation of muscle adaptation		Predicted intracellular proteins; Voltage-gated ion channels:Transient Receptor Potential Channels; Disease related genes; Potential drug targets; Transporters:Transporter channels and pores; Human disease related genes:Nervous system diseases:Neurodegenerative diseases			(M271)PID PI3K PLC TRK PATHWAY		0.0	0.0	0.0	0.0	1.0	0.0	1.0	1.0	0.0	0.0	0.0	1.0	0.0	0.0	0.0	0.0	0.0	1.0	1.0	0.0
ANTXR1	84168	symbol	H. sapiens	84168	H. sapiens	ANTXR1	ANTXR cell adhesion molecule 1	GO:1901202 negative regulation of extracellular matrix assembly;GO:1905050 positive regulation of metallopeptidase activity;GO:1903054 negative regulation of extracellular matrix organization		Human disease related genes:Cardiovascular diseases:Vascular diseases; Predicted intracellular proteins; Disease related genes	Vesicles (Uncertain)	MDX-1303	(M267)PID ANTHRAX PATHWAY		0.0	0.0	0.0	0.0	0.0	0.0	0.0	0.0	0.0	1.0	0.0	0.0	0.0	0.0	0.0	0.0	0.0	1.0	0.0	0.0
GINM1	116254	symbol	H. sapiens	116254	H. sapiens	GINM1	glycoprotein integral membrane 1			Predicted intracellular proteins	Nucleoli fibrillar center;Plasma membrane (Approved)				0.0	0.0	0.0	0.0	0.0	0.0	0.0	0.0	0.0	0.0	0.0	0.0	0.0	0.0	0.0	0.0	0.0	0.0	0.0	0.0
PCOLCE2	26577	symbol	H. sapiens	26577	H. sapiens	PCOLCE2	procollagen C-endopeptidase enhancer 2	GO:1990830 cellular response to leukemia inhibitory factor;GO:1990823 response to leukemia inhibitory factor;GO:0010952 positive regulation of peptidase activity		Predicted secreted proteins	Cytosol;Nucleoplasm (Approved)		(M3008)NABA ECM GLYCOPROTEINS; (M5884)NABA CORE MATRISOME; (M5889)NABA MATRISOME	(M5930)HALLMARK EPITHELIAL MESENCHYMAL TRANSITION	0.0	0.0	0.0	0.0	0.0	1.0	0.0	0.0	0.0	0.0	0.0	0.0	0.0	0.0	0.0	0.0	1.0	0.0	0.0	0.0
CTSB	1508	symbol	H. sapiens	1508	H. sapiens	CTSB	cathepsin B	GO:0006590 thyroid hormone generation;GO:0097067 cellular response to thyroid hormone stimulus;GO:0042403 thyroid hormone metabolic process		Candidate cardiovascular disease genes; Cancer-related genes:Candidate cancer biomarkers; Human disease related genes:Digestive system diseases:Pancreas diseases; ENZYME proteins:Hydrolases; Predicted secreted proteins; Peptidases:Cysteine-type peptidases; Disease related genes; Potential drug targets; Enzymes; Predicted intracellular proteins	Vesicles (Supported); Additional: Nucleoli	2-Aminoethanimidic Acid; 3-Amino-4-Oxybenzyl-2-Butanone; 3-Methylphenylalanine; N-(3-Propylcarbamoyloxirane-2-Carbonyl)-Isoleucyl-Proline; 2-Pyridinethiol; Diphenylacetic acid; N-[1-Hydroxycarboxyethyl-Carbonyl]Leucylamino-2-Methyl-Butane; N-{[(2S,3S)-3-(Ethoxycarbonyl)-2-oxiranyl]carbonyl}-L-threonyl-L-isoleucine; N-{[(2S,3S)-3-(ETHOXYCARBONYL)OXIRAN-2-YL]CARBONYL}-L-ISOLEUCINE; BENZYL N-({(2S,3…	(M3468)NABA ECM REGULATORS; (M5885)NABA MATRISOME ASSOCIATED; (M5889)NABA MATRISOME	(M5946)HALLMARK COAGULATION; (M5921)HALLMARK COMPLEMENT; (M5945)HALLMARK HEME METABOLISM	0.0	0.0	0.0	1.0	0.0	1.0	0.0	0.0	1.0	0.0	0.0	0.0	0.0	0.0	1.0	0.0	0.0	0.0	0.0	0.0
STARD5	80765	symbol	H. sapiens	80765	H. sapiens	STARD5	StAR related lipid transfer domain containing 5	GO:0035376 sterol import;GO:0070508 cholesterol import;GO:0120009 intermembrane lipid transfer		Predicted intracellular proteins	Vesicles (Approved); Additional: Cytosol				0.0	0.0	0.0	0.0	0.0	0.0	0.0	0.0	1.0	0.0	0.0	0.0	0.0	0.0	0.0	0.0	0.0	0.0	0.0	0.0
PRKG2	5593	symbol	H. sapiens	5593	H. sapiens	PRKG2	protein kinase cGMP-dependent 2	GO:2001226 negative regulation of chloride transport;GO:0036289 peptidyl-serine autophosphorylation;GO:0046146 tetrahydrobiopterin metabolic process	AGC Ser/Thr protein kinase family	Enzymes; Kinases:AGC Ser/Thr protein kinases; Predicted intracellular proteins; ENZYME proteins:Transferases		Fostamatinib		(M5953)HALLMARK KRAS SIGNALING UP	0.0	0.0	0.0	0.0	0.0	0.0	0.0	1.0	1.0	0.0	0.0	0.0	1.0	0.0	0.0	1.0	0.0	0.0	1.0	0.0
ASAP1	50807	symbol	H. sapiens	50807	H. sapiens	ASAP1	ArfGAP with SH3 domain, ankyrin repeat and PH domain 1	GO:1903527 positive regulation of membrane tubulation;GO:1903525 regulation of membrane tubulation;GO:0071803 positive regulation of podosome assembly		Predicted intracellular proteins	Centrosome;Cytosol;Plasma membrane (Approved)		(M243)PID ARF 3PATHWAY; (M281)PID FAK PATHWAY		0.0	0.0	0.0	0.0	0.0	0.0	0.0	1.0	0.0	0.0	0.0	0.0	0.0	0.0	0.0	0.0	0.0	0.0	0.0	0.0
EPB41L3	23136	symbol	H. sapiens	23136	H. sapiens	EPB41L3	erythrocyte membrane protein band 4.1 like 3	GO:0002175 protein localization to paranode region of axon;GO:0071205 protein localization to juxtaparanode region of axon;GO:0030913 paranodal junction assembly		Predicted intracellular proteins	Cell Junctions;Plasma membrane (Enhanced)			(M5953)HALLMARK KRAS SIGNALING UP	0.0	0.0	0.0	0.0	0.0	0.0	0.0	0.0	0.0	0.0	0.0	0.0	0.0	0.0	0.0	0.0	0.0	1.0	0.0	0.0
IL15RA	3601	symbol	H. sapiens	3601	H. sapiens	IL15RA	interleukin 15 receptor subunit alpha	GO:0035723 interleukin-15-mediated signaling pathway;GO:0071350 cellular response to interleukin-15;GO:0032825 positive regulation of natural killer cell differentiation		Predicted secreted proteins; Predicted intracellular proteins; CD markers				(M5897)HALLMARK IL6 JAK STAT3 SIGNALING; (M5890)HALLMARK TNFA SIGNALING VIA NFKB; (M5913)HALLMARK INTERFERON GAMMA RESPONSE	0.0	1.0	0.0	0.0	0.0	0.0	0.0	1.0	0.0	0.0	0.0	0.0	1.0	0.0	0.0	0.0	1.0	0.0	0.0	0.0
IL17RA	23765	symbol	H. sapiens	23765	H. sapiens	IL17RA	interleukin 17 receptor A	GO:2000340 positive regulation of chemokine (C-X-C motif) ligand 1 production;GO:0072537 fibroblast activation;GO:2000338 regulation of chemokine (C-X-C motif) ligand 1 production		Predicted secreted proteins; Human disease related genes:Immune system diseases:Other immune system diseases; CD markers; Disease related genes	Cytosol;Nucleoplasm (Approved)			(M5897)HALLMARK IL6 JAK STAT3 SIGNALING	0.0	0.0	1.0	0.0	0.0	0.0	0.0	1.0	0.0	0.0	0.0	0.0	0.0	0.0	0.0	1.0	1.0	1.0	0.0	0.0
TMED5	50999	symbol	H. sapiens	50999	H. sapiens	TMED5	transmembrane p24 trafficking protein 5	GO:0090161 Golgi ribbon formation;GO:0006888 endoplasmic reticulum to Golgi vesicle-mediated transport;GO:0007030 Golgi organization		Predicted intracellular proteins					0.0	0.0	0.0	0.0	0.0	0.0	0.0	0.0	0.0	0.0	0.0	0.0	0.0	0.0	0.0	0.0	0.0	0.0	0.0	0.0
KIAA1328	57536	symbol	H. sapiens	57536	H. sapiens	KIAA1328	KIAA1328			Predicted intracellular proteins	Nuclear speckles (Approved); Additional: Lipid droplets;Vesicles				0.0	0.0	0.0	0.0	0.0	0.0	0.0	0.0	0.0	0.0	0.0	0.0	0.0	0.0	0.0	0.0	0.0	0.0	0.0	0.0
ZNF266	10781	symbol	H. sapiens	10781	H. sapiens	ZNF266	zinc finger protein 266	GO:0000122 negative regulation of transcription by RNA polymerase II;GO:0045892 negative regulation of transcription, DNA-templated;GO:1903507 negative regulation of nucleic acid-templated transcription		Predicted intracellular proteins; Transcription factors:Zinc-coordinating DNA-binding domains	Vesicles (Supported); Additional: Nucleoplasm;Rods & Rings				0.0	0.0	0.0	0.0	0.0	0.0	0.0	0.0	0.0	0.0	0.0	0.0	0.0	0.0	0.0	0.0	0.0	0.0	0.0	0.0
ARHGEF3	50650	symbol	H. sapiens	50650	H. sapiens	ARHGEF3	Rho guanine nucleotide exchange factor 3	GO:0035025 positive regulation of Rho protein signal transduction;GO:0007266 Rho protein signal transduction;GO:0046579 positive regulation of Ras protein signal transduction		Predicted intracellular proteins	Cytosol (Approved)		(M68)PID RHOA REG PATHWAY	(M5893)HALLMARK MITOTIC SPINDLE	0.0	0.0	0.0	0.0	0.0	0.0	0.0	0.0	0.0	0.0	0.0	0.0	0.0	0.0	0.0	0.0	0.0	0.0	0.0	0.0
GLDN	342035	symbol	H. sapiens	342035	H. sapiens	GLDN	gliomedin	GO:0045162 clustering of voltage-gated sodium channels;GO:0045161 neuronal ion channel clustering;GO:0032528 microvillus organization		Human disease related genes:Congenital malformations:Congenital malformations of the musculoskeletal system; Predicted secreted proteins; Predicted intracellular proteins; Disease related genes	Plasma membrane;Vesicles (Supported)		(M3008)NABA ECM GLYCOPROTEINS; (M5884)NABA CORE MATRISOME; (M5889)NABA MATRISOME		0.0	0.0	0.0	0.0	0.0	0.0	0.0	0.0	0.0	0.0	0.0	0.0	0.0	0.0	0.0	0.0	0.0	0.0	0.0	0.0
MAOB	4129	symbol	H. sapiens	4129	H. sapiens	MAOB	monoamine oxidase B	GO:0010044 response to aluminum ion;GO:0014063 negative regulation of serotonin secretion;GO:0045915 positive regulation of catecholamine metabolic process		Enzymes; FDA approved drug targets:Small molecule drugs; ENZYME proteins:Oxidoreductases		Amphetamine; Phentermine; Tranylcypromine; Phenelzine; Zonisamide; Selegiline; Pioglitazone; Moclobemide; Isocarboxazid; Ephedra sinica root; Rasagiline; MMDA; 4-Methoxyamphetamine; Metamfetamine; Pargyline; Isatin; (R)-N-methyl-N-2-propynyl-1-indanamine; Farnesol; N-Dodecyl-N,N-Dimethyl-3-Ammonio-1-Propanesulfonate; Flavin adenine dinucleotide; N-Propargyl-1(S)-Aminoindan; Dodecyldimethylamine N…	(M275)PID ALPHA SYNUCLEIN PATHWAY	(M5936)HALLMARK OXIDATIVE PHOSPHORYLATION	0.0	0.0	0.0	1.0	0.0	0.0	0.0	0.0	1.0	0.0	0.0	0.0	0.0	0.0	0.0	0.0	0.0	0.0	0.0	0.0
CTSF	8722	symbol	H. sapiens	8722	H. sapiens	CTSF	cathepsin F	GO:0019886 antigen processing and presentation of exogenous peptide antigen via MHC class II;GO:0002495 antigen processing and presentation of peptide antigen via MHC class II;GO:0002504 antigen processing and presentation of peptide or polysaccharide antigen via MHC class II		Human disease related genes:Congenital disorders of metabolism:Lysosomal storage diseases; ENZYME proteins:Hydrolases; Human disease related genes:Congenital disorders of metabolism:Congenital disorders of lipid/glycolipid metabolism; Peptidases:Cysteine-type peptidases; Disease related genes; Potential drug targets; Enzymes; Predicted intracellular proteins	Vesicles (Supported); Additional: Endoplasmic reticulum;Plasma membrane	[1-(1-Methyl-4,5-Dioxo-Pent-2-Enylcarbamoyl)-2-Phenyl-Ethyl]-Carbamic Acid Benzyl Ester; [1-(1-Benzyl-3-Hydroxy-2-Oxo-Propylcarbamoyl)-2-Phenyl-Ethyl]-Carbamic Acid Benzyl Ester; 4-Morpholin-4-Yl-Piperidine-1-Carboxylic Acid [1-(3-Benzenesulfonyl-1-Propyl-Allylcarbamoyl)-2-Phenylethyl]-Amide; Benzyl N-[(2S)-5-(diaminomethylamino)-1-[[(2S)-4-fluoro-3-oxobutan-2-yl]amino]-1-oxopentan-2-yl]carbamate…	(M3468)NABA ECM REGULATORS; (M5885)NABA MATRISOME ASSOCIATED; (M5889)NABA MATRISOME	(M5939)HALLMARK P53 PATHWAY	0.0	0.0	0.0	0.0	0.0	1.0	0.0	0.0	0.0	0.0	0.0	0.0	0.0	0.0	0.0	0.0	0.0	0.0	0.0	0.0
USP25	29761	symbol	H. sapiens	29761	H. sapiens	USP25	ubiquitin specific peptidase 25	GO:1904293 negative regulation of ERAD pathway;GO:1904292 regulation of ERAD pathway;GO:0070536 protein K63-linked deubiquitination		Enzymes; ENZYME proteins:Hydrolases; Predicted intracellular proteins; Peptidases:Cysteine-type peptidases	Cytosol (Supported)				0.0	0.0	0.0	0.0	0.0	0.0	0.0	1.0	0.0	0.0	0.0	0.0	0.0	0.0	0.0	0.0	0.0	0.0	0.0	0.0
ADCY7	113	symbol	H. sapiens	113	H. sapiens	ADCY7	adenylate cyclase 7	GO:0006171 cAMP biosynthetic process;GO:0071285 cellular response to lithium ion;GO:0071361 cellular response to ethanol		Enzymes; ENZYME proteins:Lyases; Predicted intracellular proteins	Cytosol (Approved)		(M56)PID LPA4 PATHWAY; (M8)PID ENDOTHELIN PATHWAY; (M15)PID LYSOPHOSPHOLIPID PATHWAY		0.0	0.0	0.0	0.0	1.0	0.0	0.0	1.0	0.0	0.0	0.0	0.0	1.0	1.0	0.0	1.0	0.0	0.0	0.0	0.0
MAPK1	5594	symbol	H. sapiens	5594	H. sapiens	MAPK1	mitogen-activated protein kinase 1	GO:0019858 cytosine metabolic process;GO:0090170 regulation of Golgi inheritance;GO:0072584 caveolin-mediated endocytosis	CMGC Ser/Thr protein kinase family	FDA approved drug targets:Small molecule drugs; Cancer-related genes:Candidate cancer biomarkers; Human disease related genes:Congenital malformations:Other congenital malformations; Kinases:CMGC Ser/Thr protein kinases; Enzymes; RAS pathway related proteins; Predicted intracellular proteins; ENZYME proteins:Transferases	Cytosol (Supported); Additional: Nuclear speckles	Acetylsalicylic acid; Minocycline; Isoprenaline; Arsenic trioxide; Olomoucine; Phosphonothreonine; Purvalanol; SB220025; Seliciclib; Perifosine; N,N-DIMETHYL-4-(4-PHENYL-1H-PYRAZOL-3-YL)-1H-PYRROLE-2-CARBOXAMIDE; N-BENZYL-4-[4-(3-CHLOROPHENYL)-1H-PYRAZOL-3-YL]-1H-PYRROLE-2-CARBOXAMIDE; (S)-N-(1-(3-CHLORO-4-FLUOROPHENYL)-2-HYDROXYETHYL)-4-(4-(3-CHLOROPHENYL)-1H-PYRAZOL-3-YL)-1H-PYRROLE-2-CARBOXAMI…	(M64)PID S1P S1P4 PATHWAY; (M134)PID TCR RAS PATHWAY; (M120)PID ARF6 DOWNSTREAM PATHWAY	(M5910)HALLMARK PROTEIN SECRETION; (M5923)HALLMARK PI3K AKT MTOR SIGNALING	1.0	0.0	1.0	1.0	0.0	1.0	0.0	1.0	0.0	1.0	1.0	1.0	1.0	0.0	1.0	1.0	1.0	1.0	1.0	1.0
PLA2R1	22925	symbol	H. sapiens	22925	H. sapiens	PLA2R1	phospholipase A2 receptor 1	GO:1900139 negative regulation of arachidonic acid secretion;GO:1904633 regulation of glomerular visceral epithelial cell apoptotic process;GO:1904635 positive regulation of glomerular visceral epithelial cell apoptotic process		Predicted secreted proteins	Cytosol (Approved)				0.0	0.0	0.0	0.0	0.0	0.0	0.0	1.0	1.0	0.0	0.0	1.0	0.0	0.0	0.0	0.0	0.0	0.0	0.0	0.0
NEK1	4750	symbol	H. sapiens	4750	H. sapiens	NEK1	NIMA related kinase 1	GO:0018108 peptidyl-tyrosine phosphorylation;GO:0018212 peptidyl-tyrosine modification;GO:0060271 cilium assembly	NEK Ser/Thr protein kinase family	Kinases:NEK Ser/Thr protein kinases; Human disease related genes:Congenital malformations:Congenital malformations of the musculoskeletal system; Disease related genes; Potential drug targets; Enzymes; Predicted intracellular proteins; ENZYME proteins:Transferases	Cytosol (Supported); Additional: Centriolar satellite;Nucleoplasm	Fostamatinib	(M10154)SA G2 AND M PHASES		0.0	0.0	0.0	0.0	0.0	0.0	0.0	0.0	0.0	0.0	0.0	0.0	0.0	0.0	0.0	0.0	0.0	0.0	0.0	0.0
P2RY1	5028	symbol	H. sapiens	5028	H. sapiens	P2RY1	purinergic receptor P2Y1	GO:0010700 negative regulation of norepinephrine secretion;GO:0060406 positive regulation of penile erection;GO:0032962 positive regulation of inositol trisphosphate biosynthetic process		G-protein coupled receptors:GPCRs excl olfactory receptors; Transporters; G-protein coupled receptors:Adenosine and adenine nucleotide receptors				(M5946)HALLMARK COAGULATION	1.0	0.0	0.0	1.0	0.0	0.0	0.0	0.0	0.0	0.0	1.0	1.0	0.0	0.0	0.0	1.0	0.0	0.0	1.0	0.0
SLC40A1	30061	symbol	H. sapiens	30061	H. sapiens	SLC40A1	solute carrier family 40 member 1	GO:0060345 spleen trabecula formation;GO:1903988 iron ion export across plasma membrane;GO:0034395 regulation of transcription from RNA polymerase II promoter in response to iron		Human disease related genes:Congenital disorders of metabolism:Congenital disorders of ion transport and metabolism; Disease related genes; Potential drug targets; Transporters:Electrochemical Potential-driven transporters; Predicted intracellular proteins	Cytosol;Plasma membrane (Approved); Additional: Nucleoplasm				0.0	0.0	0.0	0.0	1.0	0.0	1.0	0.0	0.0	0.0	0.0	1.0	0.0	0.0	0.0	0.0	0.0	0.0	0.0	0.0
HADHA	3030	symbol	H. sapiens	3030	H. sapiens	HADHA	hydroxyacyl-CoA dehydrogenase trifunctional multienzyme complex subunit alpha	GO:0035965 cardiolipin acyl-chain remodeling;GO:0032048 cardiolipin metabolic process;GO:0046471 phosphatidylglycerol metabolic process		ENZYME proteins:Oxidoreductases; Human disease related genes:Congenital disorders of metabolism:Congenital disorders of lipid/glycolipid metabolism; ENZYME proteins:Lyases; Disease related genes; Potential drug targets; Enzymes; Predicted intracellular proteins; Human disease related genes:Congenital disorders of metabolism:Mitochondrial diseases	Mitochondria (Enhanced)	NADH		(M5936)HALLMARK OXIDATIVE PHOSPHORYLATION	0.0	0.0	0.0	1.0	0.0	0.0	0.0	0.0	1.0	0.0	0.0	0.0	0.0	0.0	0.0	0.0	0.0	0.0	0.0	0.0
PDE8A	5151	symbol	H. sapiens	5151	H. sapiens	PDE8A	phosphodiesterase 8A	GO:0006198 cAMP catabolic process;GO:0009214 cyclic nucleotide catabolic process;GO:1903206 negative regulation of hydrogen peroxide-induced cell death		Enzymes; ENZYME proteins:Hydrolases; Predicted intracellular proteins	Golgi apparatus (Approved)	3-isobutyl-1-methyl-7H-xanthine			1.0	0.0	0.0	0.0	0.0	0.0	0.0	0.0	0.0	0.0	1.0	0.0	0.0	0.0	0.0	0.0	0.0	0.0	0.0	0.0
ATG12	9140	symbol	H. sapiens	9140	H. sapiens	ATG12	autophagy related 12	GO:1904971 regulation of viral translation;GO:1904973 positive regulation of viral translation;GO:0006501 C-terminal protein lipidation		Transporters; Predicted intracellular proteins	Nucleoplasm;Vesicles (Approved)				0.0	0.0	0.0	0.0	0.0	0.0	0.0	1.0	0.0	0.0	0.0	0.0	0.0	0.0	0.0	0.0	0.0	0.0	0.0	0.0

## Sheet: Enrichment
GroupID	Category	Term	Description	LogP	Log(q-value)	InTerm_InList	Genes	Symbols
1_Summary	GO Biological Processes	GO:0001934	positive regulation of protein phosphorylation	-11.3477	-7.00097	36/722	658,2252,2254,2258,2660,3356,3570,3717,3791,4216,5028,5151,5155,5168,5594,5618,5879,5906,6423,7039,7048,8829,10006,10457,10507,10892,23531,23568,28232,28984,51704,55294,65125,79817,80310,84830,5569,11213,25778,26191,55450,113791,55208,222166,2308,9448,114897,220164	BMPR1B,FGF7,FGF9,FGF13,MSTN,HTR2A,IL6R,JAK2,KDR,MAP3K4,P2RY1,PDE8A,PDGFB,ENPP2,MAPK1,PRLR,RAC1,RAP1A,SFRP2,TGFA,TGFBR2,NRP1,ABI1,GPNMB,SEMA4D,MALT1,MMD,ARL2BP,SLCO3A1,RGCC,GPRC5B,FBXW7,WNK1,MOB3B,PDGFD,ADTRP,PKIA,IRAK3,DSTYK,PTPN22,CAMK2N1,PIK3IP1,DCUN1D2,MTURN,FOXO1,MAP4K4,C1QTNF1,DOK6
1_Member	GO Biological Processes	GO:0001934	positive regulation of protein phosphorylation	-11.3477	-7.00097	36/722	658,2252,2254,2258,2660,3356,3570,3717,3791,4216,5028,5151,5155,5168,5594,5618,5879,5906,6423,7039,7048,8829,10006,10457,10507,10892,23531,23568,28232,28984,51704,55294,65125,79817,80310,84830	BMPR1B,FGF7,FGF9,FGF13,MSTN,HTR2A,IL6R,JAK2,KDR,MAP3K4,P2RY1,PDE8A,PDGFB,ENPP2,MAPK1,PRLR,RAC1,RAP1A,SFRP2,TGFA,TGFBR2,NRP1,ABI1,GPNMB,SEMA4D,MALT1,MMD,ARL2BP,SLCO3A1,RGCC,GPRC5B,FBXW7,WNK1,MOB3B,PDGFD,ADTRP
1_Member	GO Biological Processes	GO:0045860	positive regulation of protein kinase activity	-6.6796	-3.63394	20/393	658,2258,3356,3570,3717,4216,5155,5618,5906,7039,7048,10006,10892,23531,28984,51704,55294,65125,79817,80310	BMPR1B,FGF13,HTR2A,IL6R,JAK2,MAP3K4,PDGFB,PRLR,RAP1A,TGFA,TGFBR2,ABI1,MALT1,MMD,RGCC,GPRC5B,FBXW7,WNK1,MOB3B,PDGFD
1_Member	GO Biological Processes	GO:0043549	regulation of kinase activity	-6.6515	-3.62703	29/763	658,2258,2660,3356,3570,3717,3791,4216,5155,5569,5618,5906,6423,7039,7048,10006,10892,11213,23531,25778,26191,28984,51704,55294,55450,65125,79817,80310,113791	BMPR1B,FGF13,MSTN,HTR2A,IL6R,JAK2,KDR,MAP3K4,PDGFB,PKIA,PRLR,RAP1A,SFRP2,TGFA,TGFBR2,ABI1,MALT1,IRAK3,MMD,DSTYK,PTPN22,RGCC,GPRC5B,FBXW7,CAMK2N1,WNK1,MOB3B,PDGFD,PIK3IP1
1_Member	GO Biological Processes	GO:0033674	positive regulation of kinase activity	-6.61451	-3.61025	22/473	658,2258,3356,3570,3717,3791,4216,5155,5618,5906,7039,7048,10006,10892,23531,25778,28984,51704,55294,65125,79817,80310	BMPR1B,FGF13,HTR2A,IL6R,JAK2,KDR,MAP3K4,PDGFB,PRLR,RAP1A,TGFA,TGFBR2,ABI1,MALT1,MMD,DSTYK,RGCC,GPRC5B,FBXW7,WNK1,MOB3B,PDGFD
1_Member	GO Biological Processes	GO:0051347	positive regulation of transferase activity	-6.52848	-3.57302	24/559	658,2258,3356,3570,3717,3791,4216,5155,5594,5618,5906,7039,7048,10006,10892,23531,25778,28984,51704,55208,55294,65125,79817,80310	BMPR1B,FGF13,HTR2A,IL6R,JAK2,KDR,MAP3K4,PDGFB,MAPK1,PRLR,RAP1A,TGFA,TGFBR2,ABI1,MALT1,MMD,DSTYK,RGCC,GPRC5B,DCUN1D2,FBXW7,WNK1,MOB3B,PDGFD
1_Member	GO Biological Processes	GO:0045859	regulation of protein kinase activity	-5.96101	-3.28642	25/645	658,2258,3356,3570,3717,4216,5155,5569,5618,5906,6423,7039,7048,10006,10892,11213,23531,26191,28984,51704,55294,55450,65125,79817,80310	BMPR1B,FGF13,HTR2A,IL6R,JAK2,MAP3K4,PDGFB,PKIA,PRLR,RAP1A,SFRP2,TGFA,TGFBR2,ABI1,MALT1,IRAK3,MMD,PTPN22,RGCC,GPRC5B,FBXW7,CAMK2N1,WNK1,MOB3B,PDGFD
1_Member	GO Biological Processes	GO:0050731	positive regulation of peptidyl-tyrosine phosphorylation	-5.941	-3.27556	13/190	2252,3356,3570,3717,5155,5168,7039,8829,10006,10507,23568,51704,55294	FGF7,HTR2A,IL6R,JAK2,PDGFB,ENPP2,TGFA,NRP1,ABI1,SEMA4D,ARL2BP,GPRC5B,FBXW7
1_Member	GO Biological Processes	GO:0050730	regulation of peptidyl-tyrosine phosphorylation	-5.80141	-3.17073	15/261	2252,3356,3570,3717,5155,5168,6423,7039,8829,10006,10507,23568,51704,55294,80310	FGF7,HTR2A,IL6R,JAK2,PDGFB,ENPP2,SFRP2,TGFA,NRP1,ABI1,SEMA4D,ARL2BP,GPRC5B,FBXW7,PDGFD
1_Member	GO Biological Processes	GO:0070374	positive regulation of ERK1 and ERK2 cascade	-5.23715	-2.76552	13/220	3356,3791,5028,5151,5155,5906,8829,10457,25778,26191,55294,80310,222166	HTR2A,KDR,P2RY1,PDE8A,PDGFB,RAP1A,NRP1,GPNMB,DSTYK,PTPN22,FBXW7,PDGFD,MTURN
1_Member	GO Biological Processes	GO:0032147	activation of protein kinase activity	-5.0924	-2.64796	10/132	2258,3717,5155,5618,7048,10892,28984,51704,65125,79817	FGF13,JAK2,PDGFB,PRLR,TGFBR2,MALT1,RGCC,GPRC5B,WNK1,MOB3B
1_Member	GO Biological Processes	GO:0043408	regulation of MAPK cascade	-4.52208	-2.28143	23/686	2308,3356,3717,3791,4216,5028,5151,5155,5594,5906,6423,7039,8829,9448,10457,11213,25778,26191,55294,80310,114897,220164,222166	FOXO1,HTR2A,JAK2,KDR,MAP3K4,P2RY1,PDE8A,PDGFB,MAPK1,RAP1A,SFRP2,TGFA,NRP1,MAP4K4,GPNMB,IRAK3,DSTYK,PTPN22,FBXW7,PDGFD,C1QTNF1,DOK6,MTURN
1_Member	GO Biological Processes	GO:0043410	positive regulation of MAPK cascade	-4.15311	-2.03687	18/490	3356,3717,3791,4216,5028,5151,5155,5906,7039,8829,10457,25778,26191,55294,80310,114897,220164,222166	HTR2A,JAK2,KDR,MAP3K4,P2RY1,PDE8A,PDGFB,RAP1A,TGFA,NRP1,GPNMB,DSTYK,PTPN22,FBXW7,PDGFD,C1QTNF1,DOK6,MTURN
1_Member	GO Biological Processes	GO:0070372	regulation of ERK1 and ERK2 cascade	-3.68726	-1.70607	13/311	3356,3791,5028,5151,5155,5906,8829,10457,25778,26191,55294,80310,222166	HTR2A,KDR,P2RY1,PDE8A,PDGFB,RAP1A,NRP1,GPNMB,DSTYK,PTPN22,FBXW7,PDGFD,MTURN
1_Member	GO Biological Processes	GO:0061098	positive regulation of protein tyrosine kinase activity	-3.16545	-1.37143	5/55	5155,7039,10006,51704,55294	PDGFB,TGFA,ABI1,GPRC5B,FBXW7
1_Member	GO Biological Processes	GO:0043405	regulation of MAP kinase activity	-2.59392	-0.980435	8/183	3356,4216,5155,6423,7039,11213,26191,80310	HTR2A,MAP3K4,PDGFB,SFRP2,TGFA,IRAK3,PTPN22,PDGFD
1_Member	GO Biological Processes	GO:0061097	regulation of protein tyrosine kinase activity	-2.2213	-0.751991	5/90	5155,7039,10006,51704,55294	PDGFB,TGFA,ABI1,GPRC5B,FBXW7
1_Member	GO Biological Processes	GO:0071900	regulation of protein serine/threonine kinase activity	-2.05337	-0.641187	11/372	658,3356,4216,5155,5569,6423,7039,11213,26191,28984,80310	BMPR1B,HTR2A,MAP3K4,PDGFB,PKIA,SFRP2,TGFA,IRAK3,PTPN22,RGCC,PDGFD
2_Summary	GO Biological Processes	GO:0030155	regulation of cell adhesion	-10.7163	-6.67068	36/760	347,1432,1604,1803,1901,3676,3717,3791,3910,4313,4321,5155,5618,5879,6423,7048,8808,8829,9404,9448,10457,10507,10630,10892,11170,25975,26191,28984,53833,54518,56477,65125,83700,84830,114897,151887,677,3162,3598,3601,6935,30011,56603,114757,284021	APOD,MAPK14,CD55,DPP4,S1PR1,ITGA4,JAK2,KDR,LAMA4,MMP2,MMP12,PDGFB,PRLR,RAC1,SFRP2,TGFBR2,IL1RL2,NRP1,LPXN,MAP4K4,GPNMB,SEMA4D,PDPN,MALT1,FAM107A,EGFL6,PTPN22,RGCC,IL20RB,APBB1IP,CCL28,WNK1,JAM3,ADTRP,C1QTNF1,CCDC80,ZFP36L1,HMOX1,IL13RA2,IL15RA,ZEB1,SH3KBP1,CYP26B1,CYGB,MILR1
2_Member	GO Biological Processes	GO:0030155	regulation of cell adhesion	-10.7163	-6.67068	36/760	347,1432,1604,1803,1901,3676,3717,3791,3910,4313,4321,5155,5618,5879,6423,7048,8808,8829,9404,9448,10457,10507,10630,10892,11170,25975,26191,28984,53833,54518,56477,65125,83700,84830,114897,151887	APOD,MAPK14,CD55,DPP4,S1PR1,ITGA4,JAK2,KDR,LAMA4,MMP2,MMP12,PDGFB,PRLR,RAC1,SFRP2,TGFBR2,IL1RL2,NRP1,LPXN,MAP4K4,GPNMB,SEMA4D,PDPN,MALT1,FAM107A,EGFL6,PTPN22,RGCC,IL20RB,APBB1IP,CCL28,WNK1,JAM3,ADTRP,C1QTNF1,CCDC80
2_Member	GO Biological Processes	GO:0045785	positive regulation of cell adhesion	-5.24006	-2.76552	19/446	1604,1803,3676,3717,3791,5155,5879,6423,7048,8808,8829,9448,10630,10892,25975,26191,54518,56477,151887	CD55,DPP4,ITGA4,JAK2,KDR,PDGFB,RAC1,SFRP2,TGFBR2,IL1RL2,NRP1,MAP4K4,PDPN,MALT1,EGFL6,PTPN22,APBB1IP,CCL28,CCDC80
2_Member	GO Biological Processes	GO:0022407	regulation of cell-cell adhesion	-4.0311	-1.96028	17/456	1432,1604,1803,3676,3717,7048,8808,10457,10630,10892,26191,28984,53833,56477,65125,84830,114897	MAPK14,CD55,DPP4,ITGA4,JAK2,TGFBR2,IL1RL2,GPNMB,PDPN,MALT1,PTPN22,RGCC,IL20RB,CCL28,WNK1,ADTRP,C1QTNF1
2_Member	GO Biological Processes	GO:0046641	positive regulation of alpha-beta T cell proliferation	-3.71741	-1.72675	4/23	1604,3717,7048,26191	CD55,JAK2,TGFBR2,PTPN22
2_Member	GO Biological Processes	GO:0050865	regulation of cell activation	-3.6778	-1.70033	21/681	677,1604,1803,3162,3598,3601,3717,5155,6935,7048,8808,10457,10630,10892,26191,30011,53833,56603,114757,114897,284021	ZFP36L1,CD55,DPP4,HMOX1,IL13RA2,IL15RA,JAK2,PDGFB,ZEB1,TGFBR2,IL1RL2,GPNMB,PDPN,MALT1,PTPN22,SH3KBP1,IL20RB,CYP26B1,CYGB,C1QTNF1,MILR1
2_Member	GO Biological Processes	GO:1903037	regulation of leukocyte cell-cell adhesion	-3.27012	-1.4316	13/344	1604,1803,3676,3717,7048,8808,10457,10892,26191,53833,56477,65125,84830	CD55,DPP4,ITGA4,JAK2,TGFBR2,IL1RL2,GPNMB,MALT1,PTPN22,IL20RB,CCL28,WNK1,ADTRP
2_Member	GO Biological Processes	GO:0046640	regulation of alpha-beta T cell proliferation	-2.90593	-1.19271	4/37	1604,3717,7048,26191	CD55,JAK2,TGFBR2,PTPN22
2_Member	GO Biological Processes	GO:0046635	positive regulation of alpha-beta T cell activation	-2.74751	-1.08656	5/68	1604,3717,7048,10892,26191	CD55,JAK2,TGFBR2,MALT1,PTPN22
2_Member	GO Biological Processes	GO:0002694	regulation of leukocyte activation	-2.48265	-0.918439	17/629	677,1604,1803,3162,3598,3601,3717,6935,7048,8808,10457,10892,26191,30011,53833,56603,284021	ZFP36L1,CD55,DPP4,HMOX1,IL13RA2,IL15RA,JAK2,ZEB1,TGFBR2,IL1RL2,GPNMB,MALT1,PTPN22,SH3KBP1,IL20RB,CYP26B1,MILR1
2_Member	GO Biological Processes	GO:0050863	regulation of T cell activation	-2.31574	-0.815394	11/342	1604,1803,3717,6935,7048,8808,10457,10892,26191,53833,56603	CD55,DPP4,JAK2,ZEB1,TGFBR2,IL1RL2,GPNMB,MALT1,PTPN22,IL20RB,CYP26B1
2_Member	GO Biological Processes	GO:0051249	regulation of lymphocyte activation	-2.04146	-0.631982	14/532	677,1604,1803,3601,3717,6935,7048,8808,10457,10892,26191,30011,53833,56603	ZFP36L1,CD55,DPP4,IL15RA,JAK2,ZEB1,TGFBR2,IL1RL2,GPNMB,MALT1,PTPN22,SH3KBP1,IL20RB,CYP26B1
3_Summary	GO Biological Processes	GO:0040017	positive regulation of locomotion	-10.2321	-6.36252	31/599	1901,2252,2254,2660,3162,3554,3570,3676,3717,3791,4313,5155,5168,5594,5879,7048,8650,8829,9423,9448,10457,10507,10630,11149,11170,55737,64094,65125,80310,83700,131578,9638,1803,4321,10623,22861,23765,51704,55450,353091	S1PR1,FGF7,FGF9,MSTN,HMOX1,IL1R1,IL6R,ITGA4,JAK2,KDR,MMP2,PDGFB,ENPP2,MAPK1,RAC1,TGFBR2,NUMB,NRP1,NTN1,MAP4K4,GPNMB,SEMA4D,PDPN,BVES,FAM107A,VPS35,SMOC2,WNK1,PDGFD,JAM3,LRRC15,FEZ1,DPP4,MMP12,POLR3C,NLRP1,IL17RA,GPRC5B,CAMK2N1,RAET1G
3_Member	GO Biological Processes	GO:0040017	positive regulation of locomotion	-10.2321	-6.36252	31/599	1901,2252,2254,2660,3162,3554,3570,3676,3717,3791,4313,5155,5168,5594,5879,7048,8650,8829,9423,9448,10457,10507,10630,11149,11170,55737,64094,65125,80310,83700,131578	S1PR1,FGF7,FGF9,MSTN,HMOX1,IL1R1,IL6R,ITGA4,JAK2,KDR,MMP2,PDGFB,ENPP2,MAPK1,RAC1,TGFBR2,NUMB,NRP1,NTN1,MAP4K4,GPNMB,SEMA4D,PDPN,BVES,FAM107A,VPS35,SMOC2,WNK1,PDGFD,JAM3,LRRC15
3_Member	GO Biological Processes	GO:0051272	positive regulation of cellular component movement	-9.62871	-5.88408	30/596	1901,2252,2254,2660,3162,3554,3570,3676,3717,3791,4313,5155,5168,5594,5879,7048,8650,8829,9423,9448,9638,10457,10507,10630,11170,64094,65125,80310,83700,131578	S1PR1,FGF7,FGF9,MSTN,HMOX1,IL1R1,IL6R,ITGA4,JAK2,KDR,MMP2,PDGFB,ENPP2,MAPK1,RAC1,TGFBR2,NUMB,NRP1,NTN1,MAP4K4,FEZ1,GPNMB,SEMA4D,PDPN,FAM107A,SMOC2,WNK1,PDGFD,JAM3,LRRC15
3_Member	GO Biological Processes	GO:2000147	positive regulation of cell motility	-9.18897	-5.66078	29/584	1901,2252,2254,2660,3162,3554,3570,3676,3717,3791,4313,5155,5168,5594,5879,7048,8650,8829,9423,9448,10457,10507,10630,11170,64094,65125,80310,83700,131578	S1PR1,FGF7,FGF9,MSTN,HMOX1,IL1R1,IL6R,ITGA4,JAK2,KDR,MMP2,PDGFB,ENPP2,MAPK1,RAC1,TGFBR2,NUMB,NRP1,NTN1,MAP4K4,GPNMB,SEMA4D,PDPN,FAM107A,SMOC2,WNK1,PDGFD,JAM3,LRRC15
3_Member	GO Biological Processes	GO:0030335	positive regulation of cell migration	-8.95601	-5.51241	28/560	1901,2252,2254,2660,3162,3554,3570,3676,3717,3791,4313,5155,5168,5594,5879,7048,8650,8829,9448,10457,10507,10630,11170,64094,65125,80310,83700,131578	S1PR1,FGF7,FGF9,MSTN,HMOX1,IL1R1,IL6R,ITGA4,JAK2,KDR,MMP2,PDGFB,ENPP2,MAPK1,RAC1,TGFBR2,NUMB,NRP1,MAP4K4,GPNMB,SEMA4D,PDPN,FAM107A,SMOC2,WNK1,PDGFD,JAM3,LRRC15
3_Member	GO Biological Processes	GO:0050920	regulation of chemotaxis	-5.85826	-3.21054	14/225	1803,1901,2660,3570,3791,5155,5594,5879,8829,10507,64094,65125,80310,83700	DPP4,S1PR1,MSTN,IL6R,KDR,PDGFB,MAPK1,RAC1,NRP1,SEMA4D,SMOC2,WNK1,PDGFD,JAM3
3_Member	GO Biological Processes	GO:0050921	positive regulation of chemotaxis	-5.69885	-3.09253	11/140	1901,2660,3570,3791,5155,5594,5879,8829,64094,65125,80310	S1PR1,MSTN,IL6R,KDR,PDGFB,MAPK1,RAC1,NRP1,SMOC2,WNK1,PDGFD
3_Member	GO Biological Processes	GO:0032103	positive regulation of response to external stimulus	-5.29583	-2.79424	19/442	1901,2660,3570,3717,3791,4321,5155,5594,5879,8829,10623,22861,23765,51704,55450,64094,65125,80310,353091	S1PR1,MSTN,IL6R,JAK2,KDR,MMP12,PDGFB,MAPK1,RAC1,NRP1,POLR3C,NLRP1,IL17RA,GPRC5B,CAMK2N1,SMOC2,WNK1,PDGFD,RAET1G
4_Summary	GO Biological Processes	GO:0071396	cellular response to lipid	-9.3981	-5.75039	27/499	19,490,677,968,1432,1620,1645,1646,2660,2908,3717,4313,5166,5176,5241,5244,5594,6781,8031,8644,10892,11170,26191,56603,84649,84830,92140,717,1508,1520,2308,2730,3030,3162,4129,5066,5618,7048,7068,7706,11031,54331,261729,366,3356,5028,5155,5906	ABCA1,ATP2B1,ZFP36L1,CD68,MAPK14,BRINP1,AKR1C1,AKR1C2,MSTN,NR3C1,JAK2,MMP2,PDK4,SERPINF1,PGR,ABCB4,MAPK1,STC1,NCOA4,AKR1C3,MALT1,FAM107A,PTPN22,CYP26B1,DGAT2,ADTRP,MTDH,C2,CTSB,CTSS,FOXO1,GCLM,HADHA,HMOX1,MAOB,PAM,PRLR,TGFBR2,THRB,TRIM25,RAB31,GNG2,STEAP2,AQP9,HTR2A,P2RY1,PDGFB,RAP1A
4_Member	GO Biological Processes	GO:0071396	cellular response to lipid	-9.3981	-5.75039	27/499	19,490,677,968,1432,1620,1645,1646,2660,2908,3717,4313,5166,5176,5241,5244,5594,6781,8031,8644,10892,11170,26191,56603,84649,84830,92140	ABCA1,ATP2B1,ZFP36L1,CD68,MAPK14,BRINP1,AKR1C1,AKR1C2,MSTN,NR3C1,JAK2,MMP2,PDK4,SERPINF1,PGR,ABCB4,MAPK1,STC1,NCOA4,AKR1C3,MALT1,FAM107A,PTPN22,CYP26B1,DGAT2,ADTRP,MTDH
4_Member	GO Biological Processes	GO:0009725	response to hormone	-9.16237	-5.66078	33/742	490,677,717,1432,1508,1520,1645,1646,2308,2660,2730,2908,3030,3162,3717,4129,4313,5066,5166,5176,5241,5618,6781,7048,7068,7706,8031,8644,11031,11170,54331,84830,261729	ATP2B1,ZFP36L1,C2,MAPK14,CTSB,CTSS,AKR1C1,AKR1C2,FOXO1,MSTN,GCLM,NR3C1,HADHA,HMOX1,JAK2,MAOB,MMP2,PAM,PDK4,SERPINF1,PGR,PRLR,STC1,TGFBR2,THRB,TRIM25,NCOA4,AKR1C3,RAB31,FAM107A,GNG2,ADTRP,STEAP2
4_Member	GO Biological Processes	GO:0032870	cellular response to hormone stimulus	-7.28503	-4.08448	23/470	490,677,1508,1520,1645,1646,2308,2660,2730,2908,3717,5166,5176,5241,5618,6781,7068,8031,8644,11031,11170,54331,84830	ATP2B1,ZFP36L1,CTSB,CTSS,AKR1C1,AKR1C2,FOXO1,MSTN,GCLM,NR3C1,JAK2,PDK4,SERPINF1,PGR,PRLR,STC1,THRB,NCOA4,AKR1C3,RAB31,FAM107A,GNG2,ADTRP
4_Member	GO Biological Processes	GO:0071384	cellular response to corticosteroid stimulus	-7.2281	-4.05751	9/59	490,677,2660,2908,3717,5176,6781,8644,11170	ATP2B1,ZFP36L1,MSTN,NR3C1,JAK2,SERPINF1,STC1,AKR1C3,FAM107A
4_Member	GO Biological Processes	GO:0071383	cellular response to steroid hormone stimulus	-6.50473	-3.57302	12/142	490,677,2660,2908,3717,5176,5241,6781,8031,8644,11170,84830	ATP2B1,ZFP36L1,MSTN,NR3C1,JAK2,SERPINF1,PGR,STC1,NCOA4,AKR1C3,FAM107A,ADTRP
4_Member	GO Biological Processes	GO:0071385	cellular response to glucocorticoid stimulus	-6.45041	-3.55042	8/53	490,677,2660,2908,3717,5176,6781,11170	ATP2B1,ZFP36L1,MSTN,NR3C1,JAK2,SERPINF1,STC1,FAM107A
4_Member	GO Biological Processes	GO:0071407	cellular response to organic cyclic compound	-6.15095	-3.37771	22/504	366,490,677,2660,2730,2908,3356,3717,4313,5028,5155,5176,5241,5244,5594,5906,6781,8031,8644,11170,54331,84830	AQP9,ATP2B1,ZFP36L1,MSTN,GCLM,NR3C1,HTR2A,JAK2,MMP2,P2RY1,PDGFB,SERPINF1,PGR,ABCB4,MAPK1,RAP1A,STC1,NCOA4,AKR1C3,FAM107A,GNG2,ADTRP
4_Member	GO Biological Processes	GO:0048545	response to steroid hormone	-5.58017	-2.98936	15/272	490,677,2660,2908,3717,4129,5066,5176,5241,6781,7048,8031,8644,11170,84830	ATP2B1,ZFP36L1,MSTN,NR3C1,JAK2,MAOB,PAM,SERPINF1,PGR,STC1,TGFBR2,NCOA4,AKR1C3,FAM107A,ADTRP
4_Member	GO Biological Processes	GO:1901655	cellular response to ketone	-5.50998	-2.93026	9/93	490,1646,2660,2908,3717,5176,8031,8644,54331	ATP2B1,AKR1C2,MSTN,NR3C1,JAK2,SERPINF1,NCOA4,AKR1C3,GNG2
4_Member	GO Biological Processes	GO:0031960	response to corticosteroid	-5.21579	-2.75559	11/157	490,677,2660,2908,3717,4129,5066,5176,6781,8644,11170	ATP2B1,ZFP36L1,MSTN,NR3C1,JAK2,MAOB,PAM,SERPINF1,STC1,AKR1C3,FAM107A
4_Member	GO Biological Processes	GO:0051384	response to glucocorticoid	-4.89444	-2.54339	10/139	490,677,2660,2908,3717,4129,5066,5176,6781,11170	ATP2B1,ZFP36L1,MSTN,NR3C1,JAK2,MAOB,PAM,SERPINF1,STC1,FAM107A
4_Member	GO Biological Processes	GO:1901654	response to ketone	-4.46024	-2.24066	11/189	490,1646,2660,2908,3717,4129,5176,5244,8031,8644,54331	ATP2B1,AKR1C2,MSTN,NR3C1,JAK2,MAOB,SERPINF1,ABCB4,NCOA4,AKR1C3,GNG2
4_Member	GO Biological Processes	GO:0071549	cellular response to dexamethasone stimulus	-3.50309	-1.59863	4/26	2660,2908,3717,5176	MSTN,NR3C1,JAK2,SERPINF1
4_Member	GO Biological Processes	GO:0071548	response to dexamethasone	-2.7377	-1.07998	4/41	2660,2908,3717,5176	MSTN,NR3C1,JAK2,SERPINF1
5_Summary	Reactome Gene Sets	R-HSA-382551	Transport of small molecules	-8.76059	-5.36814	32/729	19,113,119,347,366,490,1193,1836,3162,3990,4891,5244,6646,7222,8029,8714,8989,23460,23568,28232,30061,54331,55117,56606,65125,79895,79901,81614,114757,133308,261729,285195	ABCA1,ADCY7,ADD2,APOD,AQP9,ATP2B1,CLIC2,SLC26A2,HMOX1,LIPC,SLC11A2,ABCB4,SOAT1,TRPC3,CUBN,ABCC3,TRPA1,ABCA6,ARL2BP,SLCO3A1,SLC40A1,GNG2,SLC6A15,SLC2A9,WNK1,ATP8B4,CYBRD1,NIPA2,CYGB,SLC9B2,STEAP2,SLC9A9
5_Member	Reactome Gene Sets	R-HSA-382551	Transport of small molecules	-8.76059	-5.36814	32/729	19,113,119,347,366,490,1193,1836,3162,3990,4891,5244,6646,7222,8029,8714,8989,23460,23568,28232,30061,54331,55117,56606,65125,79895,79901,81614,114757,133308,261729,285195	ABCA1,ADCY7,ADD2,APOD,AQP9,ATP2B1,CLIC2,SLC26A2,HMOX1,LIPC,SLC11A2,ABCB4,SOAT1,TRPC3,CUBN,ABCC3,TRPA1,ABCA6,ARL2BP,SLCO3A1,SLC40A1,GNG2,SLC6A15,SLC2A9,WNK1,ATP8B4,CYBRD1,NIPA2,CYGB,SLC9B2,STEAP2,SLC9A9
5_Member	Reactome Gene Sets	R-HSA-425407	SLC-mediated transmembrane transport	-2.29175	-0.79876	9/250	347,1836,4891,23568,28232,30061,55117,56606,285195	APOD,SLC26A2,SLC11A2,ARL2BP,SLCO3A1,SLC40A1,SLC6A15,SLC2A9,SLC9A9
5_Member	Reactome Gene Sets	R-HSA-5619115	Disorders of transmembrane transporters	-2.11357	-0.679211	7/176	19,1836,4891,5244,30061,56606,285195	ABCA1,SLC26A2,SLC11A2,ABCB4,SLC40A1,SLC2A9,SLC9A9
5_Member	Reactome Gene Sets	R-HSA-5619102	SLC transporter disorders	-2.06803	-0.651782	5/98	1836,4891,30061,56606,285195	SLC26A2,SLC11A2,SLC40A1,SLC2A9,SLC9A9
6_Summary	Canonical Pathways	M5885	NABA MATRISOME ASSOCIATED	-8.4492	-5.10252	32/751	308,310,1508,1513,1520,2252,2254,2258,2660,4313,4321,5155,5176,5648,5654,6423,7039,8722,9976,10507,25891,25975,56477,80310,80760,113791,114897,114899,135228,160364,339855,387836,3676,3791,3910,10516,23127,26577,83700,131873,717,2730,7068,1805,23768,64094,151887,143,843,5594,5601,1759,9371,26052,968,4891	ANXA5,ANXA7,CTSB,CTSK,CTSS,FGF7,FGF9,FGF13,MSTN,MMP2,MMP12,PDGFB,SERPINF1,MASP1,HTRA1,SFRP2,TGFA,CTSF,CLEC2B,SEMA4D,PAMR1,EGFL6,CCL28,PDGFD,ITIH5,PIK3IP1,C1QTNF1,C1QTNF3,CD109,CLEC12A,KY,CLEC2A,ITGA4,KDR,LAMA4,FBLN5,COLGALT2,PCOLCE2,JAM3,COL6A6,C2,GCLM,THRB,DPT,FLRT2,SMOC2,CCDC80,PARP4,CASP10,MAPK1,MAPK9,DNM1,KIF3B,DNM3,CD68,SLC11A2
6_Member	Canonical Pathways	M5885	NABA MATRISOME ASSOCIATED	-8.4492	-5.10252	32/751	308,310,1508,1513,1520,2252,2254,2258,2660,4313,4321,5155,5176,5648,5654,6423,7039,8722,9976,10507,25891,25975,56477,80310,80760,113791,114897,114899,135228,160364,339855,387836	ANXA5,ANXA7,CTSB,CTSK,CTSS,FGF7,FGF9,FGF13,MSTN,MMP2,MMP12,PDGFB,SERPINF1,MASP1,HTRA1,SFRP2,TGFA,CTSF,CLEC2B,SEMA4D,PAMR1,EGFL6,CCL28,PDGFD,ITIH5,PIK3IP1,C1QTNF1,C1QTNF3,CD109,CLEC12A,KY,CLEC2A
6_Member	Reactome Gene Sets	R-HSA-1474244	Extracellular matrix organization	-5.04843	-2.6319	15/301	1508,1513,1520,3676,3791,3910,4313,4321,5155,5654,10516,23127,26577,83700,131873	CTSB,CTSK,CTSS,ITGA4,KDR,LAMA4,MMP2,MMP12,PDGFB,HTRA1,FBLN5,COLGALT2,PCOLCE2,JAM3,COL6A6
6_Member	Canonical Pathways	M3468	NABA ECM REGULATORS	-4.87046	-2.53194	13/238	1508,1513,1520,4313,4321,5176,5648,5654,8722,25891,80760,135228,339855	CTSB,CTSK,CTSS,MMP2,MMP12,SERPINF1,MASP1,HTRA1,CTSF,PAMR1,ITIH5,CD109,KY
6_Member	GO Biological Processes	GO:0097066	response to thyroid hormone	-4.51417	-2.28143	5/29	717,1508,1520,2730,7068	C2,CTSB,CTSS,GCLM,THRB
6_Member	GO Biological Processes	GO:0030198	extracellular matrix organization	-4.36591	-2.17758	13/266	1513,1520,1805,4313,4321,6423,10516,23127,23768,25975,64094,131873,151887	CTSK,CTSS,DPT,MMP2,MMP12,SFRP2,FBLN5,COLGALT2,FLRT2,EGFL6,SMOC2,COL6A6,CCDC80
6_Member	GO Biological Processes	GO:0043062	extracellular structure organization	-4.34919	-2.16982	13/267	1513,1520,1805,4313,4321,6423,10516,23127,23768,25975,64094,131873,151887	CTSK,CTSS,DPT,MMP2,MMP12,SFRP2,FBLN5,COLGALT2,FLRT2,EGFL6,SMOC2,COL6A6,CCDC80
6_Member	GO Biological Processes	GO:0045229	external encapsulating structure organization	-4.31599	-2.14249	13/269	1513,1520,1805,4313,4321,6423,10516,23127,23768,25975,64094,131873,151887	CTSK,CTSS,DPT,MMP2,MMP12,SFRP2,FBLN5,COLGALT2,FLRT2,EGFL6,SMOC2,COL6A6,CCDC80
6_Member	GO Biological Processes	GO:0097067	cellular response to thyroid hormone stimulus	-4.26169	-2.10988	4/17	1508,1520,2730,7068	CTSB,CTSS,GCLM,THRB
6_Member	GO Biological Processes	GO:0030574	collagen catabolic process	-3.92914	-1.88565	5/38	1508,1513,1520,4313,4321	CTSB,CTSK,CTSS,MMP2,MMP12
6_Member	KEGG Pathway	hsa04210	Apoptosis	-3.42524	-1.53945	8/136	143,843,1508,1513,1520,5594,5601,8722	PARP4,CASP10,CTSB,CTSK,CTSS,MAPK1,MAPK9,CTSF
6_Member	Reactome Gene Sets	R-HSA-1679131	Trafficking and processing of endosomal TLR	-3.26909	-1.4316	3/13	1508,1513,1520	CTSB,CTSK,CTSS
6_Member	GO Biological Processes	GO:0032963	collagen metabolic process	-3.05937	-1.29702	5/58	1508,1513,1520,4313,4321	CTSB,CTSK,CTSS,MMP2,MMP12
6_Member	Reactome Gene Sets	R-HSA-2132295	MHC class II antigen presentation	-2.97808	-1.24418	7/123	1508,1513,1520,1759,8722,9371,26052	CTSB,CTSK,CTSS,DNM1,CTSF,KIF3B,DNM3
6_Member	Reactome Gene Sets	R-HSA-1442490	Collagen degradation	-2.86531	-1.16404	5/64	1508,1513,4313,4321,131873	CTSB,CTSK,MMP2,MMP12,COL6A6
6_Member	Reactome Gene Sets	R-HSA-1474228	Degradation of the extracellular matrix	-2.65498	-1.02263	7/140	1508,1513,1520,4313,4321,5654,131873	CTSB,CTSK,CTSS,MMP2,MMP12,HTRA1,COL6A6
6_Member	GO Biological Processes	GO:0022617	extracellular matrix disassembly	-2.55222	-0.959069	4/46	1513,1520,4313,4321	CTSK,CTSS,MMP2,MMP12
6_Member	Reactome Gene Sets	R-HSA-1474290	Collagen formation	-2.2213	-0.751991	5/90	1508,1520,23127,26577,131873	CTSB,CTSS,COLGALT2,PCOLCE2,COL6A6
6_Member	KEGG Pathway	hsa04142	Lysosome	-2.14724	-0.702404	6/132	968,1508,1513,1520,4891,8722	CD68,CTSB,CTSK,CTSS,SLC11A2,CTSF
7_Summary	WikiPathways	WP4313	Ferroptosis	-7.93825	-4.63296	10/66	1645,1646,1803,2730,3162,4891,8031,8644,30061,51703,490,26872,79901,261729,2308,6649,3676,3763,3772,285195,7222	AKR1C1,AKR1C2,DPP4,GCLM,HMOX1,SLC11A2,NCOA4,AKR1C3,SLC40A1,ACSL5,ATP2B1,STEAP1,CYBRD1,STEAP2,FOXO1,SOD3,ITGA4,KCNJ6,KCNJ15,SLC9A9,TRPC3
7_Member	WikiPathways	WP4313	Ferroptosis	-7.93825	-4.63296	10/66	1645,1646,1803,2730,3162,4891,8031,8644,30061,51703	AKR1C1,AKR1C2,DPP4,GCLM,HMOX1,SLC11A2,NCOA4,AKR1C3,SLC40A1,ACSL5
7_Member	KEGG Pathway	hsa04978	Mineral absorption	-4.94479	-2.57582	7/60	490,3162,4891,26872,30061,79901,261729	ATP2B1,HMOX1,SLC11A2,STEAP1,SLC40A1,CYBRD1,STEAP2
7_Member	KEGG Pathway	hsa04216	Ferroptosis	-4.88957	-2.54289	6/41	2730,3162,4891,8031,30061,51703	GCLM,HMOX1,SLC11A2,NCOA4,SLC40A1,ACSL5
7_Member	GO Biological Processes	GO:0055072	iron ion homeostasis	-4.05604	-1.97417	7/82	3162,4891,8031,26872,30061,79901,261729	HMOX1,SLC11A2,NCOA4,STEAP1,SLC40A1,CYBRD1,STEAP2
7_Member	GO Biological Processes	GO:0033212	iron import into cell	-3.95661	-1.90218	3/8	4891,79901,261729	SLC11A2,CYBRD1,STEAP2
7_Member	GO Biological Processes	GO:0006879	cellular iron ion homeostasis	-3.81287	-1.79252	6/63	3162,4891,8031,30061,79901,261729	HMOX1,SLC11A2,NCOA4,SLC40A1,CYBRD1,STEAP2
7_Member	WikiPathways	WP3286	Copper homeostasis	-3.20232	-1.38665	5/54	2308,4891,6649,26872,261729	FOXO1,SLC11A2,SOD3,STEAP1,STEAP2
7_Member	GO Biological Processes	GO:0010039	response to iron ion	-3.20177	-1.38665	4/31	3162,4891,30061,79901	HMOX1,SLC11A2,SLC40A1,CYBRD1
7_Member	Reactome Gene Sets	R-HSA-917937	Iron uptake and transport	-3.05937	-1.29702	5/58	3162,4891,30061,79901,261729	HMOX1,SLC11A2,SLC40A1,CYBRD1,STEAP2
7_Member	GO Biological Processes	GO:0034755	iron ion transmembrane transport	-2.98963	-1.25466	3/16	4891,30061,261729	SLC11A2,SLC40A1,STEAP2
7_Member	GO Biological Processes	GO:0055076	transition metal ion homeostasis	-2.78164	-1.10618	7/133	3162,4891,8031,26872,30061,79901,261729	HMOX1,SLC11A2,NCOA4,STEAP1,SLC40A1,CYBRD1,STEAP2
7_Member	GO Biological Processes	GO:0046916	cellular transition metal ion homeostasis	-2.5714	-0.969785	6/108	3162,4891,8031,30061,79901,261729	HMOX1,SLC11A2,NCOA4,SLC40A1,CYBRD1,STEAP2
7_Member	GO Biological Processes	GO:0006826	iron ion transport	-2.32861	-0.81977	4/53	4891,30061,79901,261729	SLC11A2,SLC40A1,CYBRD1,STEAP2
7_Member	GO Biological Processes	GO:0098657	import into cell	-2.07523	-0.652311	7/179	3676,3763,3772,4891,79901,261729,285195	ITGA4,KCNJ6,KCNJ15,SLC11A2,CYBRD1,STEAP2,SLC9A9
7_Member	GO Biological Processes	GO:0000041	transition metal ion transport	-2.03216	-0.627975	5/100	4891,7222,30061,79901,261729	SLC11A2,TRPC3,SLC40A1,CYBRD1,STEAP2
8_Summary	WikiPathways	WP437	EGF/EGFR signaling pathway	-7.57856	-4.31106	14/163	1432,1759,2308,3717,4216,5594,5601,5879,5898,5906,8867,10006,30011,50807,1901,3791,5155,9448,4313,7048,2252,2254,7039,54331,80310,658,3162,3554,684,3676,3910,131873,9140,80854,3570,9423,5618,113,25945,1513,5306,11213,843,7706,220164,7068,10892,3356,8989,4321,6935,1520,22925,8829,677,2258,1195,5593,65125,2892,8650,83700,9976,5569,2908,5087,490,2280,5654,7222,64121,3601,55534,6801,23765,29761	MAPK14,DNM1,FOXO1,JAK2,MAP3K4,MAPK1,MAPK9,RAC1,RALA,RAP1A,SYNJ1,ABI1,SH3KBP1,ASAP1,S1PR1,KDR,PDGFB,MAP4K4,MMP2,TGFBR2,FGF7,FGF9,TGFA,GNG2,PDGFD,BMPR1B,HMOX1,IL1R1,BST2,ITGA4,LAMA4,COL6A6,ATG12,SETD7,IL6R,NTN1,PRLR,ADCY7,NECTIN3,CTSK,PITPNA,IRAK3,CASP10,TRIM25,DOK6,THRB,MALT1,HTR2A,TRPA1,MMP12,ZEB1,CTSS,PLA2R1,NRP1,ZFP36L1,FGF13,CLK1,PRKG2,WNK1,GRIA3,NUMB,JAM3,CLEC2B,PKIA,NR3C1,PBX1,ATP2B1,FKBP1A,…
8_Member	WikiPathways	WP437	EGF/EGFR signaling pathway	-7.57856	-4.31106	14/163	1432,1759,2308,3717,4216,5594,5601,5879,5898,5906,8867,10006,30011,50807	MAPK14,DNM1,FOXO1,JAK2,MAP3K4,MAPK1,MAPK9,RAC1,RALA,RAP1A,SYNJ1,ABI1,SH3KBP1,ASAP1
8_Member	Canonical Pathways	M103	PID S1P S1P1 PATHWAY	-5.24377	-2.76552	5/21	1901,3791,5155,5594,5879	S1PR1,KDR,PDGFB,MAPK1,RAC1
8_Member	Canonical Pathways	M62	PID EPHB FWD PATHWAY	-4.95361	-2.58006	6/40	1759,5594,5879,5906,8867,9448	DNM1,MAPK1,RAC1,RAP1A,SYNJ1,MAP4K4
8_Member	CORUM	CORUM:6799	VEGFR2-S1PR1-ERK1/2-PKC-alpha complex	-4.69237	-2.3949	3/5	1901,3791,5594	S1PR1,KDR,MAPK1
8_Member	WikiPathways	WP2324	AGE/RAGE pathway	-4.6687	-2.38271	7/66	1432,2308,3717,4313,5594,5601,5879	MAPK14,FOXO1,JAK2,MMP2,MAPK1,MAPK9,RAC1
8_Member	Canonical Pathways	M55	PID S1P S1P3 PATHWAY	-4.51417	-2.28143	5/29	1901,3717,5155,5594,5879	S1PR1,JAK2,PDGFB,MAPK1,RAC1
8_Member	KEGG Pathway	hsa04933	AGE-RAGE signaling pathway in diabetic complications	-4.35475	-2.17242	8/100	1432,2308,3717,4313,5594,5601,5879,7048	MAPK14,FOXO1,JAK2,MMP2,MAPK1,MAPK9,RAC1,TGFBR2
8_Member	KEGG Pathway	hsa04014	Ras signaling pathway	-4.31	-2.13941	12/232	2252,2254,3791,5155,5594,5601,5879,5898,5906,7039,54331,80310	FGF7,FGF9,KDR,PDGFB,MAPK1,MAPK9,RAC1,RALA,RAP1A,TGFA,GNG2,PDGFD
8_Member	KEGG Pathway	hsa05418	Fluid shear stress and atherosclerosis	-4.10392	-1.99981	9/139	658,1432,3162,3554,3791,4313,5155,5601,5879	BMPR1B,MAPK14,HMOX1,IL1R1,KDR,MMP2,PDGFB,MAPK9,RAC1
8_Member	WikiPathways	WP4877	Host-pathogen interaction of human coronaviruses - MAPK signaling	-4.04437	-1.96952	5/36	684,1432,4216,5594,5601	BST2,MAPK14,MAP3K4,MAPK1,MAPK9
8_Member	WikiPathways	WP1539	Angiogenesis	-3.64261	-1.68687	4/24	1432,3791,5155,5594	MAPK14,KDR,PDGFB,MAPK1
8_Member	Reactome Gene Sets	R-HSA-450341	Activation of the AP-1 family of transcription factors	-3.63388	-1.68687	3/10	1432,5594,5601	MAPK14,MAPK1,MAPK9
8_Member	WikiPathways	WP3303	RAC1/PAK1/p38/MMP2 pathway	-3.59419	-1.65866	6/69	1432,2308,4313,5594,5601,5879	MAPK14,FOXO1,MMP2,MAPK1,MAPK9,RAC1
8_Member	Canonical Pathways	M186	PID PDGFRB PATHWAY	-3.58041	-1.65037	8/129	1901,3717,5155,5594,5601,5879,5906,10006	S1PR1,JAK2,PDGFB,MAPK1,MAPK9,RAC1,RAP1A,ABI1
8_Member	KEGG Pathway	hsa04510	Focal adhesion	-3.55007	-1.62663	10/201	3676,3791,3910,5155,5594,5601,5879,5906,80310,131873	ITGA4,KDR,LAMA4,PDGFB,MAPK1,MAPK9,RAC1,RAP1A,PDGFD,COL6A6
8_Member	KEGG Pathway	hsa04068	FoxO signaling pathway	-3.53503	-1.61557	8/131	1432,1901,2308,5594,5601,7048,9140,80854	MAPK14,S1PR1,FOXO1,MAPK1,MAPK9,TGFBR2,ATG12,SETD7
8_Member	Canonical Pathways	M183	PID IL6 7 PATHWAY	-3.48484	-1.58995	5/47	1432,2308,3570,3717,5879	MAPK14,FOXO1,IL6R,JAK2,RAC1
8_Member	WikiPathways	WP4216	Chromosomal and microsatellite instability in colorectal cancer	-3.42838	-1.53962	6/74	5594,5601,5879,5898,7048,9423	MAPK1,MAPK9,RAC1,RALA,TGFBR2,NTN1
8_Member	Canonical Pathways	M92	PID ANGIOPOIETIN RECEPTOR PATHWAY	-3.39939	-1.52105	5/49	1432,2308,4313,5594,5879	MAPK14,FOXO1,MMP2,MAPK1,RAC1
8_Member	WikiPathways	WP2037	Prolactin signaling pathway	-3.36573	-1.49471	6/76	1432,3717,5594,5601,5618,5879	MAPK14,JAK2,MAPK1,MAPK9,PRLR,RAC1
8_Member	KEGG Pathway	hsa05212	Pancreatic cancer	-3.36573	-1.49471	6/76	5594,5601,5879,5898,7039,7048	MAPK1,MAPK9,RAC1,RALA,TGFA,TGFBR2
8_Member	WikiPathways	WP3869	Cannabinoid receptor signaling	-3.31518	-1.45845	4/29	113,1432,5594,5601	ADCY7,MAPK14,MAPK1,MAPK9
8_Member	KEGG Pathway	hsa04659	Th17 cell differentiation	-3.31355	-1.45822	7/108	1432,3554,3570,3717,5594,5601,7048	MAPK14,IL1R1,IL6R,JAK2,MAPK1,MAPK9,TGFBR2
8_Member	WikiPathways	WP4747	Netrin-UNC5B signaling pathway	-3.2785	-1.43425	5/52	1432,3791,5594,5879,9423	MAPK14,KDR,MAPK1,RAC1,NTN1
8_Member	Canonical Pathways	M72	PID NECTIN PATHWAY	-3.2574	-1.4226	4/30	5155,5879,5906,25945	PDGFB,RAC1,RAP1A,NECTIN3
8_Member	WikiPathways	WP2018	RANKL/RANK signaling pathway	-3.16545	-1.37143	5/55	1432,1513,5594,5601,5879	MAPK14,CTSK,MAPK1,MAPK9,RAC1
8_Member	Canonical Pathways	M108	PID NETRIN PATHWAY	-3.14814	-1.35897	4/32	5306,5594,5879,9423	PITPNA,MAPK1,RAC1,NTN1
8_Member	WikiPathways	WP195	IL-1 signaling pathway	-3.094	-1.31567	5/57	1432,3554,5594,5601,11213	MAPK14,IL1R1,MAPK1,MAPK9,IRAK3
8_Member	KEGG Pathway	hsa05210	Colorectal cancer	-3.07949	-1.30537	6/86	5594,5601,5879,5898,7039,7048	MAPK1,MAPK9,RAC1,RALA,TGFA,TGFBR2
8_Member	Canonical Pathways	M281	PID FAK PATHWAY	-3.02543	-1.27644	5/59	5594,5601,5879,5906,50807	MAPK1,MAPK9,RAC1,RAP1A,ASAP1
8_Member	WikiPathways	WP4263	Pancreatic adenocarcinoma pathway	-3.00135	-1.25889	6/89	5594,5601,5879,5898,7039,7048	MAPK1,MAPK9,RAC1,RALA,TGFA,TGFBR2
8_Member	WikiPathways	WP3865	Novel intracellular components of RIG-I-like receptor (RLR) pathway	-2.95953	-1.22996	5/61	843,1432,5601,7706,9140	CASP10,MAPK14,MAPK9,TRIM25,ATG12
8_Member	WikiPathways	WP4542	Overview of leukocyte-intrinsic Hippo pathway functions	-2.95126	-1.22575	4/36	1432,2308,5879,5906	MAPK14,FOXO1,RAC1,RAP1A
8_Member	WikiPathways	WP306	Focal adhesion	-2.91048	-1.19271	9/202	3676,3791,3910,5155,5594,5601,5879,5906,80310	ITGA4,KDR,LAMA4,PDGFB,MAPK1,MAPK9,RAC1,RAP1A,PDGFD
8_Member	WikiPathways	WP3874	Canonical and non-canonical TGF-B signaling	-2.90942	-1.19271	3/17	1432,5601,7048	MAPK14,MAPK9,TGFBR2
8_Member	WikiPathways	WP4331	Neovascularisation processes	-2.90593	-1.19271	4/37	3791,5155,5594,5601	KDR,PDGFB,MAPK1,MAPK9
8_Member	KEGG Pathway	hsa04912	GnRH signaling pathway	-2.902	-1.1908	6/93	113,1432,4216,4313,5594,5601	ADCY7,MAPK14,MAP3K4,MMP2,MAPK1,MAPK9
8_Member	Canonical Pathways	M8	PID ENDOTHELIN PATHWAY	-2.89613	-1.18852	5/63	113,1432,3717,5594,5879	ADCY7,MAPK14,JAK2,MAPK1,RAC1
8_Member	KEGG Pathway	hsa04380	Osteoclast differentiation	-2.87744	-1.17223	7/128	1432,1513,3554,5594,5601,5879,7048	MAPK14,CTSK,IL1R1,MAPK1,MAPK9,RAC1,TGFBR2
8_Member	KEGG Pathway	hsa04926	Relaxin signaling pathway	-2.85791	-1.15762	7/129	113,1432,4313,5594,5601,7048,54331	ADCY7,MAPK14,MMP2,MAPK1,MAPK9,TGFBR2,GNG2
8_Member	Canonical Pathways	M82	PID RET PATHWAY	-2.81934	-1.12779	4/39	5594,5879,5906,220164	MAPK1,RAC1,RAP1A,DOK6
8_Member	WikiPathways	WP3915	Angiopoietin-like protein 8 regulatory pathway	-2.80043	-1.11556	7/132	1432,2308,4216,5594,5601,7068,9448	MAPK14,FOXO1,MAP3K4,MAPK1,MAPK9,THRB,MAP4K4
8_Member	WikiPathways	WP23	B cell receptor signaling pathway	-2.7849	-1.10618	6/98	1432,2308,5594,5601,5879,10892	MAPK14,FOXO1,MAPK1,MAPK9,RAC1,MALT1
8_Member	KEGG Pathway	hsa04750	Inflammatory mediator regulation of TRP channels	-2.7849	-1.10618	6/98	113,1432,3356,3554,5601,8989	ADCY7,MAPK14,HTR2A,IL1R1,MAPK9,TRPA1
8_Member	WikiPathways	WP366	TGF-beta signaling pathway	-2.78164	-1.10618	7/133	1432,4321,5594,5601,5879,6935,7048	MAPK14,MMP12,MAPK1,MAPK9,RAC1,ZEB1,TGFBR2
8_Member	KEGG Pathway	hsa05211	Renal cell carcinoma	-2.71934	-1.06462	5/69	5155,5594,5879,5906,7039	PDGFB,MAPK1,RAC1,RAP1A,TGFA
8_Member	WikiPathways	WP2036	TNF-related weak inducer of apoptosis (TWEAK) signaling pathway	-2.69858	-1.04928	4/42	1432,5594,5601,5879	MAPK14,MAPK1,MAPK9,RAC1
8_Member	KEGG Pathway	hsa04622	RIG-I-like receptor signaling pathway	-2.69166	-1.04567	5/70	843,1432,5601,7706,9140	CASP10,MAPK14,MAPK9,TRIM25,ATG12
8_Member	KEGG Pathway	hsa04917	Prolactin signaling pathway	-2.69166	-1.04567	5/70	1432,3717,5594,5601,5618	MAPK14,JAK2,MAPK1,MAPK9,PRLR
8_Member	KEGG Pathway	hsa05152	Tuberculosis	-2.63826	-1.00964	8/180	843,1432,1520,3717,5594,5601,10892,22925	CASP10,MAPK14,CTSS,JAK2,MAPK1,MAPK9,MALT1,PLA2R1
8_Member	Reactome Gene Sets	R-HSA-445144	Signal transduction by L1	-2.63452	-1.00964	3/21	5594,5879,8829	MAPK1,RAC1,NRP1
8_Member	Canonical Pathways	M175	PID ERBB2 ERBB3 PATHWAY	-2.62347	-1.00106	4/44	3717,5594,5601,5879	JAK2,MAPK1,MAPK9,RAC1
8_Member	GO Biological Processes	GO:0000165	MAPK cascade	-2.60859	-0.991883	8/182	677,1432,2258,3791,4216,5594,5601,9448	ZFP36L1,MAPK14,FGF13,KDR,MAP3K4,MAPK1,MAPK9,MAP4K4
8_Member	GO Biological Processes	GO:0018105	peptidyl-serine phosphorylation	-2.59392	-0.980435	8/183	1195,1432,5155,5593,5594,5601,7048,65125	CLK1,MAPK14,PDGFB,PRKG2,MAPK1,MAPK9,TGFBR2,WNK1
8_Member	WikiPathways	WP2380	Brain-derived neurotrophic factor (BDNF) signaling pathway	-2.5862	-0.978298	7/144	1432,2892,3717,5594,5601,5879,5906	MAPK14,GRIA3,JAK2,MAPK1,MAPK9,RAC1,RAP1A
8_Member	WikiPathways	WP2034	Leptin signaling pathway	-2.53494	-0.945655	5/76	1432,2308,3717,5594,5879	MAPK14,FOXO1,JAK2,MAPK1,RAC1
8_Member	WikiPathways	WP712	Estrogen signaling pathway	-2.51835	-0.941356	3/23	1432,5594,5601	MAPK14,MAPK1,MAPK9
8_Member	WikiPathways	WP2203	Thymic stromal lymphopoietin (TSLP) signaling pathway	-2.51793	-0.941356	4/47	1432,3717,5594,5601	MAPK14,JAK2,MAPK1,MAPK9
8_Member	Canonical Pathways	M268	PID S1P S1P2 PATHWAY	-2.46446	-0.90594	3/24	1432,5594,5879	MAPK14,MAPK1,RAC1
8_Member	Reactome Gene Sets	R-HSA-5668599	RHO GTPases Activate NADPH Oxidases	-2.46446	-0.90594	3/24	1432,5594,5879	MAPK14,MAPK1,RAC1
8_Member	Canonical Pathways	M48	PID MET PATHWAY	-2.46209	-0.904982	5/79	5594,5879,5906,8650,30011	MAPK1,RAC1,RAP1A,NUMB,SH3KBP1
8_Member	WikiPathways	WP4659	Gastrin signaling pathway	-2.45481	-0.899813	6/114	1432,2308,3717,5594,5601,5879	MAPK14,FOXO1,JAK2,MAPK1,MAPK9,RAC1
8_Member	KEGG Pathway	hsa04670	Leukocyte transendothelial migration	-2.45481	-0.899813	6/114	1432,3676,4313,5879,5906,83700	MAPK14,ITGA4,MMP2,RAC1,RAP1A,JAM3
8_Member	KEGG Pathway	hsa05167	Kaposi sarcoma-associated herpesvirus infection	-2.43935	-0.888544	8/194	1432,3717,5155,5594,5601,5879,9976,54331	MAPK14,JAK2,PDGFB,MAPK1,MAPK9,RAC1,CLEC2B,GNG2
8_Member	WikiPathways	WP2637	Interleukin-1 (IL-1) structural pathway	-2.41994	-0.872599	4/50	1432,3554,5594,5601	MAPK14,IL1R1,MAPK1,MAPK9
8_Member	Canonical Pathways	M274	PID LYMPH ANGIOGENESIS PATHWAY	-2.41303	-0.872015	3/25	1432,3676,5594	MAPK14,ITGA4,MAPK1
8_Member	WikiPathways	WP1528	Physiological and pathological hypertrophy of the heart	-2.41303	-0.872015	3/25	1432,5594,5879	MAPK14,MAPK1,RAC1
8_Member	WikiPathways	WP3668	Hypothesized pathways in pathogenesis of cardiovascular disease	-2.41303	-0.872015	3/25	1432,5594,7048	MAPK14,MAPK1,TGFBR2
8_Member	WikiPathways	WP1984	Integrated breast cancer pathway	-2.40921	-0.870739	7/155	2308,5569,5594,5879,5898,5906,7048	FOXO1,PKIA,MAPK1,RAC1,RALA,RAP1A,TGFBR2
8_Member	Canonical Pathways	M115	PID REG GR PATHWAY	-2.39252	-0.856736	5/82	1432,2908,5087,5594,5601	MAPK14,NR3C1,PBX1,MAPK1,MAPK9
8_Member	GO Biological Processes	GO:0030278	regulation of ossification	-2.38131	-0.850344	6/118	490,658,1432,1901,5087,5594	ATP2B1,BMPR1B,MAPK14,S1PR1,PBX1,MAPK1
8_Member	Canonical Pathways	M20	PID P38 MKK3 6PATHWAY	-2.36388	-0.846046	3/26	1432,4216,5879	MAPK14,MAP3K4,RAC1
8_Member	KEGG Pathway	hsa04722	Neurotrophin signaling pathway	-2.36343	-0.846046	6/119	1432,5594,5601,5879,5906,11213	MAPK14,MAPK1,MAPK9,RAC1,RAP1A,IRAK3
8_Member	WikiPathways	WP2431	Spinal cord injury	-2.34574	-0.8322	6/120	2280,3554,4321,5594,5879,9423	FKBP1A,IL1R1,MMP12,MAPK1,RAC1,NTN1
8_Member	WikiPathways	WP3888	VEGFA-VEGFR2 signaling pathway	-2.33844	-0.826177	13/439	1432,1901,2308,3791,4313,5594,5601,5654,5879,5906,7222,8650,8867	MAPK14,S1PR1,FOXO1,KDR,MMP2,MAPK1,MAPK9,HTRA1,RAC1,RAP1A,TRPC3,NUMB,SYNJ1
8_Member	KEGG Pathway	hsa05131	Shigellosis	-2.3254	-0.81977	9/247	1432,2308,3554,5594,5601,5879,9140,10892,64121	MAPK14,FOXO1,IL1R1,MAPK1,MAPK9,RAC1,ATG12,MALT1,RRAGC
8_Member	WikiPathways	WP481	Insulin signaling	-2.3195	-0.815849	7/161	1432,2308,4216,5594,5601,5879,9448	MAPK14,FOXO1,MAP3K4,MAPK1,MAPK9,RAC1,MAP4K4
8_Member	WikiPathways	WP2035	Follicle stimulating hormone (FSH) signaling pathway	-2.31682	-0.815849	3/27	1432,2308,5594	MAPK14,FOXO1,MAPK1
8_Member	Canonical Pathways	M278	PID RAC1 PATHWAY	-2.29951	-0.805309	4/54	1432,5601,5879,10006	MAPK14,MAPK9,RAC1,ABI1
8_Member	GO Biological Processes	GO:0018209	peptidyl-serine modification	-2.2838	-0.793874	8/206	1195,1432,5155,5593,5594,5601,7048,65125	CLK1,MAPK14,PDGFB,PRKG2,MAPK1,MAPK9,TGFBR2,WNK1
8_Member	WikiPathways	WP2643	Nanoparticle-mediated activation of receptor signaling	-2.22834	-0.75672	3/29	1432,5594,5601	MAPK14,MAPK1,MAPK9
8_Member	WikiPathways	WP69	T-cell receptor (TCR) signaling pathway	-2.20123	-0.73707	5/91	1432,3601,5594,5601,10892	MAPK14,IL15RA,MAPK1,MAPK9,MALT1
8_Member	Canonical Pathways	M76	PID P38 ALPHA BETA PATHWAY	-2.18667	-0.729844	3/30	1432,5879,5898	MAPK14,RAC1,RALA
8_Member	KEGG Pathway	hsa04658	Th1 and Th2 cell differentiation	-2.18143	-0.725166	5/92	1432,3717,5594,5601,55534	MAPK14,JAK2,MAPK1,MAPK9,MAML3
8_Member	Canonical Pathways	M166	PID ATF2 PATHWAY	-2.16301	-0.712715	4/59	1432,4313,5594,5601	MAPK14,MMP2,MAPK1,MAPK9
8_Member	WikiPathways	WP4205	MET in type 1 papillary renal cell carcinoma	-2.16301	-0.712715	4/59	5594,5879,5906,6801	MAPK1,RAC1,RAP1A,STRN
8_Member	KEGG Pathway	hsa04370	VEGF signaling pathway	-2.16301	-0.712715	4/59	1432,3791,5594,5879	MAPK14,KDR,MAPK1,RAC1
8_Member	Canonical Pathways	M213	PID AR NONGENOMIC PATHWAY	-2.14654	-0.702404	3/31	5594,5879,54331	MAPK1,RAC1,GNG2
8_Member	Canonical Pathways	M63	PID AVB3 OPN PATHWAY	-2.14654	-0.702404	3/31	4313,5594,5879	MMP2,MAPK1,RAC1
8_Member	Reactome Gene Sets	R-HSA-450282	MAPK targets/ Nuclear events mediated by MAP kinases	-2.14654	-0.702404	3/31	1432,5594,5601	MAPK14,MAPK1,MAPK9
8_Member	KEGG Pathway	hsa04657	IL-17 signaling pathway	-2.14262	-0.69957	5/94	1432,5594,5601,23765,29761	MAPK14,MAPK1,MAPK9,IL17RA,USP25
8_Member	WikiPathways	WP4746	Thyroid hormones production and peripheral downstream signaling effects	-2.12361	-0.684375	5/95	1432,2308,5593,5594,7068	MAPK14,FOXO1,PRKG2,MAPK1,THRB
8_Member	Canonical Pathways	M187	PID TRKR PATHWAY	-2.11221	-0.679211	4/61	1759,5594,5879,5906	DNM1,MAPK1,RAC1,RAP1A
8_Member	Reactome Gene Sets	R-HSA-2871796	FCERI mediated MAPK activation	-2.10787	-0.679211	3/32	5594,5601,5879	MAPK1,MAPK9,RAC1
8_Member	KEGG Pathway	hsa01522	Endocrine resistance	-2.06803	-0.651782	5/98	113,1432,4313,5594,5601	ADCY7,MAPK14,MMP2,MAPK1,MAPK9
8_Member	KEGG Pathway	hsa05231	Choline metabolism in cancer	-2.06803	-0.651782	5/98	5155,5594,5601,5879,80310	PDGFB,MAPK1,MAPK9,RAC1,PDGFD
8_Member	Canonical Pathways	M10	PID BCR 5PATHWAY	-2.06337	-0.649668	4/63	1432,5594,5879,10892	MAPK14,MAPK1,RAC1,MALT1
8_Member	GO Biological Processes	GO:0051403	stress-activated MAPK cascade	-2.03965	-0.631982	4/64	677,1432,5594,5601	ZFP36L1,MAPK14,MAPK1,MAPK9
8_Member	Canonical Pathways	M12705	SIG CD40PATHWAYMAP	-2.0345	-0.629325	3/34	1432,5594,5601	MAPK14,MAPK1,MAPK9
8_Member	WikiPathways	WP4223	Ras signaling	-2.00116	-0.605812	7/185	3791,5594,5601,5879,5898,5906,54331	KDR,MAPK1,MAPK9,RAC1,RALA,RAP1A,GNG2
9_Summary	GO Biological Processes	GO:1901615	organic hydroxy compound metabolic process	-7.3354	-4.10266	23/467	19,220,1508,1513,1577,1645,1646,3628,3990,4128,4129,5593,6646,8029,8644,8867,9420,26002,26031,27010,51302,56603,84649,8714,80765,5087,5618,51170,123,3030,5244,5742,22925,23683,51099,51703,79611,79888,83850,84188,5066,84668	ABCA1,ALDH1A3,CTSB,CTSK,CYP3A5,AKR1C1,AKR1C2,INPP1,LIPC,MAOA,MAOB,PRKG2,SOAT1,CUBN,AKR1C3,SYNJ1,CYP7B1,MOXD1,OSBPL3,TPK1,CYP39A1,CYP26B1,DGAT2,ABCC3,STARD5,PBX1,PRLR,HSD17B11,PLIN2,HADHA,ABCB4,PTGS1,PLA2R1,PRKD3,ABHD5,ACSL5,ACSS3,LPCAT1,ESYT3,FAR1,PAM,FAM126A
9_Member	GO Biological Processes	GO:1901615	organic hydroxy compound metabolic process	-7.3354	-4.10266	23/467	19,220,1508,1513,1577,1645,1646,3628,3990,4128,4129,5593,6646,8029,8644,8867,9420,26002,26031,27010,51302,56603,84649	ABCA1,ALDH1A3,CTSB,CTSK,CYP3A5,AKR1C1,AKR1C2,INPP1,LIPC,MAOA,MAOB,PRKG2,SOAT1,CUBN,AKR1C3,SYNJ1,CYP7B1,MOXD1,OSBPL3,TPK1,CYP39A1,CYP26B1,DGAT2
9_Member	Reactome Gene Sets	R-HSA-194068	Bile acid and bile salt metabolism	-7.02577	-3.89373	8/45	1645,1646,8644,8714,9420,26031,51302,80765	AKR1C1,AKR1C2,AKR1C3,ABCC3,CYP7B1,OSBPL3,CYP39A1,STARD5
9_Member	GO Biological Processes	GO:0006066	alcohol metabolic process	-6.09604	-3.36214	17/316	19,220,1577,1645,1646,3628,3990,5593,6646,8029,8644,8867,9420,26002,27010,51302,84649	ABCA1,ALDH1A3,CYP3A5,AKR1C1,AKR1C2,INPP1,LIPC,PRKG2,SOAT1,CUBN,AKR1C3,SYNJ1,CYP7B1,MOXD1,TPK1,CYP39A1,DGAT2
9_Member	GO Biological Processes	GO:0008202	steroid metabolic process	-5.96992	-3.28642	15/253	19,1577,1645,1646,3990,5087,5618,6646,8029,8644,9420,26031,51170,51302,56603	ABCA1,CYP3A5,AKR1C1,AKR1C2,LIPC,PBX1,PRLR,SOAT1,CUBN,AKR1C3,CYP7B1,OSBPL3,HSD17B11,CYP39A1,CYP26B1
9_Member	Reactome Gene Sets	R-HSA-192105	Synthesis of bile acids and bile salts	-5.381	-2.84722	6/34	1645,1646,8644,9420,26031,51302	AKR1C1,AKR1C2,AKR1C3,CYP7B1,OSBPL3,CYP39A1
9_Member	Reactome Gene Sets	R-HSA-556833	Metabolism of lipids	-4.90259	-2.54713	25/742	19,123,1645,1646,3030,5244,5742,8029,8644,8714,8867,9420,22925,23683,26031,51099,51170,51302,51703,79611,79888,80765,83850,84188,84649	ABCA1,PLIN2,AKR1C1,AKR1C2,HADHA,ABCB4,PTGS1,CUBN,AKR1C3,ABCC3,SYNJ1,CYP7B1,PLA2R1,PRKD3,OSBPL3,ABHD5,HSD17B11,CYP39A1,ACSL5,ACSS3,LPCAT1,STARD5,ESYT3,FAR1,DGAT2
9_Member	Reactome Gene Sets	R-HSA-8957322	Metabolism of steroids	-4.5327	-2.28638	10/153	1645,1646,8029,8644,8714,9420,26031,51170,51302,80765	AKR1C1,AKR1C2,CUBN,AKR1C3,ABCC3,CYP7B1,OSBPL3,HSD17B11,CYP39A1,STARD5
9_Member	GO Biological Processes	GO:0008610	lipid biosynthetic process	-4.27408	-2.11492	20/570	220,3628,3990,5066,5087,5618,5742,8644,8867,9420,23683,26031,51099,51170,51302,51703,79888,84188,84649,84668	ALDH1A3,INPP1,LIPC,PAM,PBX1,PRLR,PTGS1,AKR1C3,SYNJ1,CYP7B1,PRKD3,OSBPL3,ABHD5,HSD17B11,CYP39A1,ACSL5,LPCAT1,FAR1,DGAT2,FAM126A
9_Member	GO Biological Processes	GO:0006694	steroid biosynthetic process	-3.17282	-1.37143	7/114	5087,5618,8644,9420,26031,51170,51302	PBX1,PRLR,AKR1C3,CYP7B1,OSBPL3,HSD17B11,CYP39A1
9_Member	GO Biological Processes	GO:0008206	bile acid metabolic process	-2.90593	-1.19271	4/37	1645,9420,26031,51302	AKR1C1,CYP7B1,OSBPL3,CYP39A1
9_Member	GO Biological Processes	GO:0006699	bile acid biosynthetic process	-2.41303	-0.872015	3/25	9420,26031,51302	CYP7B1,OSBPL3,CYP39A1
9_Member	GO Biological Processes	GO:0072330	monocarboxylic acid biosynthetic process	-2.3195	-0.815849	7/161	220,3990,5742,8644,9420,26031,51302	ALDH1A3,LIPC,PTGS1,AKR1C3,CYP7B1,OSBPL3,CYP39A1
10_Summary	GO Biological Processes	GO:0001944	vasculature development	-7.00997	-3.89373	24/526	347,677,1432,1901,2004,2254,2308,3162,3791,4313,5155,5594,6423,7039,7048,7127,8829,10630,55294,79987,83700,84168,84830,84870,2018,5087,5241,5898,6935,9423,287,1767,2280,5066,6445,8913,10439,11149,23322,23768,27129	APOD,ZFP36L1,MAPK14,S1PR1,ELK3,FGF9,FOXO1,HMOX1,KDR,MMP2,PDGFB,MAPK1,SFRP2,TGFA,TGFBR2,TNFAIP2,NRP1,PDPN,FBXW7,SVEP1,JAM3,ANTXR1,ADTRP,RSPO3,EMX2,PBX1,PGR,RALA,ZEB1,NTN1,ANK2,DNAH5,FKBP1A,PAM,SGCG,CACNA1G,OLFM1,BVES,RPGRIP1L,FLRT2,HSPB7
10_Member	GO Biological Processes	GO:0001944	vasculature development	-7.00997	-3.89373	24/526	347,677,1432,1901,2004,2254,2308,3162,3791,4313,5155,5594,6423,7039,7048,7127,8829,10630,55294,79987,83700,84168,84830,84870	APOD,ZFP36L1,MAPK14,S1PR1,ELK3,FGF9,FOXO1,HMOX1,KDR,MMP2,PDGFB,MAPK1,SFRP2,TGFA,TGFBR2,TNFAIP2,NRP1,PDPN,FBXW7,SVEP1,JAM3,ANTXR1,ADTRP,RSPO3
10_Member	GO Biological Processes	GO:0001568	blood vessel development	-6.16529	-3.37771	22/503	347,677,1432,1901,2004,2254,2308,3162,3791,4313,5155,5594,6423,7039,7048,7127,8829,55294,83700,84168,84830,84870	APOD,ZFP36L1,MAPK14,S1PR1,ELK3,FGF9,FOXO1,HMOX1,KDR,MMP2,PDGFB,MAPK1,SFRP2,TGFA,TGFBR2,TNFAIP2,NRP1,FBXW7,JAM3,ANTXR1,ADTRP,RSPO3
10_Member	GO Biological Processes	GO:0001525	angiogenesis	-5.34689	-2.82628	16/321	347,1432,1901,2004,2254,3162,3791,4313,6423,7039,7048,7127,8829,83700,84830,84870	APOD,MAPK14,S1PR1,ELK3,FGF9,HMOX1,KDR,MMP2,SFRP2,TGFA,TGFBR2,TNFAIP2,NRP1,JAM3,ADTRP,RSPO3
10_Member	GO Biological Processes	GO:0035239	tube morphogenesis	-5.26246	-2.76703	24/661	347,677,1432,1901,2004,2018,2254,3162,3791,4313,5087,5241,5898,6423,6935,7039,7048,7127,8829,9423,55294,83700,84830,84870	APOD,ZFP36L1,MAPK14,S1PR1,ELK3,EMX2,FGF9,HMOX1,KDR,MMP2,PBX1,PGR,RALA,SFRP2,ZEB1,TGFA,TGFBR2,TNFAIP2,NRP1,NTN1,FBXW7,JAM3,ADTRP,RSPO3
10_Member	GO Biological Processes	GO:0048514	blood vessel morphogenesis	-5.04409	-2.6319	18/419	347,677,1432,1901,2004,2254,3162,3791,4313,6423,7039,7048,7127,8829,55294,83700,84830,84870	APOD,ZFP36L1,MAPK14,S1PR1,ELK3,FGF9,HMOX1,KDR,MMP2,SFRP2,TGFA,TGFBR2,TNFAIP2,NRP1,FBXW7,JAM3,ADTRP,RSPO3
10_Member	GO Biological Processes	GO:0007507	heart development	-4.57843	-2.31093	20/542	287,677,1767,1901,2280,3791,4313,5066,5155,5594,6423,6445,7048,8829,8913,10439,11149,23322,23768,27129	ANK2,ZFP36L1,DNAH5,S1PR1,FKBP1A,KDR,MMP2,PAM,PDGFB,MAPK1,SFRP2,SGCG,TGFBR2,NRP1,CACNA1G,OLFM1,BVES,RPGRIP1L,FLRT2,HSPB7
11_Summary	GO Biological Processes	GO:0070848	response to growth factor	-6.91264	-3.82123	23/493	658,677,1432,2252,2254,2530,2660,2730,2908,3791,5028,5151,5155,5594,5906,6935,7048,8829,9404,9638,23768,25778,80310	BMPR1B,ZFP36L1,MAPK14,FGF7,FGF9,FUT8,MSTN,GCLM,NR3C1,KDR,P2RY1,PDE8A,PDGFB,MAPK1,RAP1A,ZEB1,TGFBR2,NRP1,LPXN,FEZ1,FLRT2,DSTYK,PDGFD
11_Member	GO Biological Processes	GO:0070848	response to growth factor	-6.91264	-3.82123	23/493	658,677,1432,2252,2254,2530,2660,2730,2908,3791,5028,5151,5155,5594,5906,6935,7048,8829,9404,9638,23768,25778,80310	BMPR1B,ZFP36L1,MAPK14,FGF7,FGF9,FUT8,MSTN,GCLM,NR3C1,KDR,P2RY1,PDE8A,PDGFB,MAPK1,RAP1A,ZEB1,TGFBR2,NRP1,LPXN,FEZ1,FLRT2,DSTYK,PDGFD
11_Member	GO Biological Processes	GO:0071363	cellular response to growth factor stimulus	-6.14846	-3.37771	21/464	658,677,1432,2252,2254,2530,2660,2730,2908,3791,5151,5155,5906,6935,7048,8829,9404,9638,23768,25778,80310	BMPR1B,ZFP36L1,MAPK14,FGF7,FGF9,FUT8,MSTN,GCLM,NR3C1,KDR,PDE8A,PDGFB,RAP1A,ZEB1,TGFBR2,NRP1,LPXN,FEZ1,FLRT2,DSTYK,PDGFD
11_Member	GO Biological Processes	GO:0071560	cellular response to transforming growth factor beta stimulus	-3.14299	-1.35501	8/150	677,2530,2660,2908,6935,7048,9404,80310	ZFP36L1,FUT8,MSTN,NR3C1,ZEB1,TGFBR2,LPXN,PDGFD
11_Member	GO Biological Processes	GO:0071559	response to transforming growth factor beta	-3.01413	-1.26842	8/157	677,2530,2660,2908,6935,7048,9404,80310	ZFP36L1,FUT8,MSTN,NR3C1,ZEB1,TGFBR2,LPXN,PDGFD
12_Summary	GO Biological Processes	GO:0050801	ion homeostasis	-6.75835	-3.69042	29/754	287,490,783,1604,1901,2730,3162,3356,3717,3791,4891,5028,5166,5594,6781,7009,7222,8031,8913,8989,26872,30061,51554,56477,65125,79901,114897,261729,285195,2308,5176,84649,114899,1193,2258,4313,7068,11149,27129,2660,5155,79068,2280,23072,1520,22925	ANK2,ATP2B1,CACNB2,CD55,S1PR1,GCLM,HMOX1,HTR2A,JAK2,KDR,SLC11A2,P2RY1,PDK4,MAPK1,STC1,TMBIM6,TRPC3,NCOA4,CACNA1G,TRPA1,STEAP1,SLC40A1,ACKR4,CCL28,WNK1,CYBRD1,C1QTNF1,STEAP2,SLC9A9,FOXO1,SERPINF1,DGAT2,C1QTNF3,CLIC2,FGF13,MMP2,THRB,BVES,HSPB7,MSTN,PDGFB,FTO,FKBP1A,HECW1,CTSS,PLA2R1
12_Member	GO Biological Processes	GO:0050801	ion homeostasis	-6.75835	-3.69042	29/754	287,490,783,1604,1901,2730,3162,3356,3717,3791,4891,5028,5166,5594,6781,7009,7222,8031,8913,8989,26872,30061,51554,56477,65125,79901,114897,261729,285195	ANK2,ATP2B1,CACNB2,CD55,S1PR1,GCLM,HMOX1,HTR2A,JAK2,KDR,SLC11A2,P2RY1,PDK4,MAPK1,STC1,TMBIM6,TRPC3,NCOA4,CACNA1G,TRPA1,STEAP1,SLC40A1,ACKR4,CCL28,WNK1,CYBRD1,C1QTNF1,STEAP2,SLC9A9
12_Member	GO Biological Processes	GO:0055080	cation homeostasis	-6.44995	-3.55042	27/692	287,490,783,1604,1901,3162,3356,3717,3791,4891,5028,5166,5594,6781,7009,7222,8031,8989,26872,30061,51554,56477,65125,79901,114897,261729,285195	ANK2,ATP2B1,CACNB2,CD55,S1PR1,HMOX1,HTR2A,JAK2,KDR,SLC11A2,P2RY1,PDK4,MAPK1,STC1,TMBIM6,TRPC3,NCOA4,TRPA1,STEAP1,SLC40A1,ACKR4,CCL28,WNK1,CYBRD1,C1QTNF1,STEAP2,SLC9A9
12_Member	GO Biological Processes	GO:0055082	cellular chemical homeostasis	-6.33179	-3.4475	28/746	287,490,783,1604,1901,2308,2730,3162,3356,3717,4891,5028,5176,5594,6781,7009,7222,8031,8989,30061,51554,56477,79901,84649,114897,114899,261729,285195	ANK2,ATP2B1,CACNB2,CD55,S1PR1,FOXO1,GCLM,HMOX1,HTR2A,JAK2,SLC11A2,P2RY1,SERPINF1,MAPK1,STC1,TMBIM6,TRPC3,NCOA4,TRPA1,SLC40A1,ACKR4,CCL28,CYBRD1,DGAT2,C1QTNF1,C1QTNF3,STEAP2,SLC9A9
12_Member	GO Biological Processes	GO:0098771	inorganic ion homeostasis	-5.81197	-3.17286	26/702	287,490,783,1604,1901,3162,3356,3717,3791,4891,5028,5166,5594,6781,7009,7222,8031,8989,26872,30061,51554,56477,79901,114897,261729,285195	ANK2,ATP2B1,CACNB2,CD55,S1PR1,HMOX1,HTR2A,JAK2,KDR,SLC11A2,P2RY1,PDK4,MAPK1,STC1,TMBIM6,TRPC3,NCOA4,TRPA1,STEAP1,SLC40A1,ACKR4,CCL28,CYBRD1,C1QTNF1,STEAP2,SLC9A9
12_Member	GO Biological Processes	GO:0055065	metal ion homeostasis	-5.23986	-2.76552	23/618	287,490,783,1604,1901,3162,3356,3717,3791,4891,5028,6781,7009,7222,8031,8989,26872,30061,51554,56477,79901,114897,261729	ANK2,ATP2B1,CACNB2,CD55,S1PR1,HMOX1,HTR2A,JAK2,KDR,SLC11A2,P2RY1,STC1,TMBIM6,TRPC3,NCOA4,TRPA1,STEAP1,SLC40A1,ACKR4,CCL28,CYBRD1,C1QTNF1,STEAP2
12_Member	GO Biological Processes	GO:0030003	cellular cation homeostasis	-5.21709	-2.75559	23/620	287,490,783,1604,1901,3162,3356,3717,4891,5028,5594,6781,7009,7222,8031,8989,30061,51554,56477,79901,114897,261729,285195	ANK2,ATP2B1,CACNB2,CD55,S1PR1,HMOX1,HTR2A,JAK2,SLC11A2,P2RY1,MAPK1,STC1,TMBIM6,TRPC3,NCOA4,TRPA1,SLC40A1,ACKR4,CCL28,CYBRD1,C1QTNF1,STEAP2,SLC9A9
12_Member	GO Biological Processes	GO:0006873	cellular ion homeostasis	-5.04968	-2.6319	23/635	287,490,783,1604,1901,3162,3356,3717,4891,5028,5594,6781,7009,7222,8031,8989,30061,51554,56477,79901,114897,261729,285195	ANK2,ATP2B1,CACNB2,CD55,S1PR1,HMOX1,HTR2A,JAK2,SLC11A2,P2RY1,MAPK1,STC1,TMBIM6,TRPC3,NCOA4,TRPA1,SLC40A1,ACKR4,CCL28,CYBRD1,C1QTNF1,STEAP2,SLC9A9
12_Member	GO Biological Processes	GO:0006875	cellular metal ion homeostasis	-4.99959	-2.59739	21/550	287,490,783,1604,1901,3162,3356,3717,4891,5028,6781,7009,7222,8031,8989,30061,51554,56477,79901,114897,261729	ANK2,ATP2B1,CACNB2,CD55,S1PR1,HMOX1,HTR2A,JAK2,SLC11A2,P2RY1,STC1,TMBIM6,TRPC3,NCOA4,TRPA1,SLC40A1,ACKR4,CCL28,CYBRD1,C1QTNF1,STEAP2
12_Member	GO Biological Processes	GO:1903522	regulation of blood circulation	-4.5378	-2.28803	13/256	287,490,783,1193,2258,3356,3717,4313,6781,7068,8913,11149,27129	ANK2,ATP2B1,CACNB2,CLIC2,FGF13,HTR2A,JAK2,MMP2,STC1,THRB,CACNA1G,BVES,HSPB7
12_Member	GO Biological Processes	GO:0044057	regulation of system process	-4.24279	-2.09476	20/573	287,490,783,1193,2258,2308,2660,3356,3717,4313,5155,6781,7068,7222,8913,11149,27129,65125,79068,114897	ANK2,ATP2B1,CACNB2,CLIC2,FGF13,FOXO1,MSTN,HTR2A,JAK2,MMP2,PDGFB,STC1,THRB,TRPC3,CACNA1G,BVES,HSPB7,WNK1,FTO,C1QTNF1
12_Member	GO Biological Processes	GO:0008016	regulation of heart contraction	-4.10266	-1.99981	11/207	287,490,783,1193,2258,3717,6781,7068,8913,11149,27129	ANK2,ATP2B1,CACNB2,CLIC2,FGF13,JAK2,STC1,THRB,CACNA1G,BVES,HSPB7
12_Member	GO Biological Processes	GO:0055074	calcium ion homeostasis	-3.76128	-1.75702	16/435	287,490,783,1604,1901,3356,3717,3791,5028,6781,7009,7222,8989,51554,56477,114897	ANK2,ATP2B1,CACNB2,CD55,S1PR1,HTR2A,JAK2,KDR,P2RY1,STC1,TMBIM6,TRPC3,TRPA1,ACKR4,CCL28,C1QTNF1
12_Member	GO Biological Processes	GO:0006874	cellular calcium ion homeostasis	-3.40547	-1.52268	15/422	287,490,783,1604,1901,3356,3717,5028,6781,7009,7222,8989,51554,56477,114897	ANK2,ATP2B1,CACNB2,CD55,S1PR1,HTR2A,JAK2,P2RY1,STC1,TMBIM6,TRPC3,TRPA1,ACKR4,CCL28,C1QTNF1
12_Member	GO Biological Processes	GO:0072507	divalent inorganic cation homeostasis	-3.30954	-1.45562	16/478	287,490,783,1604,1901,3356,3717,3791,5028,6781,7009,7222,8989,51554,56477,114897	ANK2,ATP2B1,CACNB2,CD55,S1PR1,HTR2A,JAK2,KDR,P2RY1,STC1,TMBIM6,TRPC3,TRPA1,ACKR4,CCL28,C1QTNF1
12_Member	GO Biological Processes	GO:0051480	regulation of cytosolic calcium ion concentration	-3.07918	-1.30537	12/316	490,783,1604,1901,3356,3717,5028,7222,8989,51554,56477,114897	ATP2B1,CACNB2,CD55,S1PR1,HTR2A,JAK2,P2RY1,TRPC3,TRPA1,ACKR4,CCL28,C1QTNF1
12_Member	GO Biological Processes	GO:0072503	cellular divalent inorganic cation homeostasis	-3.06123	-1.29702	15/456	287,490,783,1604,1901,3356,3717,5028,6781,7009,7222,8989,51554,56477,114897	ANK2,ATP2B1,CACNB2,CD55,S1PR1,HTR2A,JAK2,P2RY1,STC1,TMBIM6,TRPC3,TRPA1,ACKR4,CCL28,C1QTNF1
12_Member	GO Biological Processes	GO:0007204	positive regulation of cytosolic calcium ion concentration	-2.97331	-1.24152	11/281	783,1604,1901,3356,3717,5028,7222,8989,51554,56477,114897	CACNB2,CD55,S1PR1,HTR2A,JAK2,P2RY1,TRPC3,TRPA1,ACKR4,CCL28,C1QTNF1
12_Member	GO Biological Processes	GO:0010959	regulation of metal ion transport	-2.65204	-1.02136	13/403	287,490,783,1193,2258,2280,3356,5155,6781,7009,7222,23072,65125	ANK2,ATP2B1,CACNB2,CLIC2,FGF13,FKBP1A,HTR2A,PDGFB,STC1,TMBIM6,TRPC3,HECW1,WNK1
12_Member	GO Biological Processes	GO:0043270	positive regulation of ion transport	-2.5429	-0.95285	10/273	287,490,783,1520,5028,5155,6781,7222,22925,65125	ANK2,ATP2B1,CACNB2,CTSS,P2RY1,PDGFB,STC1,TRPC3,PLA2R1,WNK1
12_Member	GO Biological Processes	GO:0051928	positive regulation of calcium ion transport	-2.36343	-0.846046	6/119	287,490,783,5155,6781,7222	ANK2,ATP2B1,CACNB2,PDGFB,STC1,TRPC3
12_Member	GO Biological Processes	GO:0051924	regulation of calcium ion transport	-2.28066	-0.791909	9/251	287,490,783,1193,2280,5155,6781,7009,7222	ANK2,ATP2B1,CACNB2,CLIC2,FKBP1A,PDGFB,STC1,TMBIM6,TRPC3
13_Summary	KEGG Pathway	hsa04010	MAPK signaling pathway	-6.5328	-3.57302	17/294	783,1432,2252,2254,3554,3791,4216,5155,5594,5601,5879,5906,7039,7048,8913,9448,80310,658,2280,2308,2530,2660,3717,4313,5166,5618,8829,9404,10006,23768,79987,220164,2258,1759,3910,5241,5898,26052,30011,131873,3570,3676,54331,113791,5176,6423,3092,6801,54518,55294,55534,113,3162,3601,8031,9371,5593,341019,25975,56477,64121	CACNB2,MAPK14,FGF7,FGF9,IL1R1,KDR,MAP3K4,PDGFB,MAPK1,MAPK9,RAC1,RAP1A,TGFA,TGFBR2,CACNA1G,MAP4K4,PDGFD,BMPR1B,FKBP1A,FOXO1,FUT8,MSTN,JAK2,MMP2,PDK4,PRLR,NRP1,LPXN,ABI1,FLRT2,SVEP1,DOK6,FGF13,DNM1,LAMA4,PGR,RALA,DNM3,SH3KBP1,COL6A6,IL6R,ITGA4,GNG2,PIK3IP1,SERPINF1,SFRP2,HIP1,STRN,APBB1IP,FBXW7,MAML3,ADCY7,HMOX1,IL15RA,NCOA4,KIF3B,PRKG2,DCDC1,EGFL6,CCL28,RRAGC
13_Member	KEGG Pathway	hsa04010	MAPK signaling pathway	-6.5328	-3.57302	17/294	783,1432,2252,2254,3554,3791,4216,5155,5594,5601,5879,5906,7039,7048,8913,9448,80310	CACNB2,MAPK14,FGF7,FGF9,IL1R1,KDR,MAP3K4,PDGFB,MAPK1,MAPK9,RAC1,RAP1A,TGFA,TGFBR2,CACNA1G,MAP4K4,PDGFD
13_Member	GO Biological Processes	GO:0007167	enzyme linked receptor protein signaling pathway	-6.52117	-3.57302	25/601	658,1432,2252,2254,2280,2308,2530,2660,3717,3791,4313,5155,5166,5594,5618,5879,7039,7048,8829,9404,10006,23768,79987,80310,220164	BMPR1B,MAPK14,FGF7,FGF9,FKBP1A,FOXO1,FUT8,MSTN,JAK2,KDR,MMP2,PDGFB,PDK4,MAPK1,PRLR,RAC1,TGFA,TGFBR2,NRP1,LPXN,ABI1,FLRT2,SVEP1,PDGFD,DOK6
13_Member	WikiPathways	WP382	MAPK signaling pathway	-6.05674	-3.3535	15/249	783,1432,2252,2254,2258,3554,4216,5155,5594,5601,5879,5906,7048,8913,9448	CACNB2,MAPK14,FGF7,FGF9,FGF13,IL1R1,MAP3K4,PDGFB,MAPK1,MAPK9,RAC1,RAP1A,TGFBR2,CACNA1G,MAP4K4
13_Member	GO Biological Processes	GO:0007169	transmembrane receptor protein tyrosine kinase signaling pathway	-5.87856	-3.22207	19/403	1432,2252,2254,2308,3717,3791,4313,5155,5166,5594,5618,5879,7039,8829,10006,23768,79987,80310,220164	MAPK14,FGF7,FGF9,FOXO1,JAK2,KDR,MMP2,PDGFB,PDK4,MAPK1,PRLR,RAC1,TGFA,NRP1,ABI1,FLRT2,SVEP1,PDGFD,DOK6
13_Member	Reactome Gene Sets	R-HSA-9006934	Signaling by Receptor Tyrosine Kinases	-5.35697	-2.82982	21/521	1432,1759,2252,2254,3717,3791,3910,5155,5241,5594,5879,5898,5906,7039,8829,10006,23768,26052,30011,80310,131873	MAPK14,DNM1,FGF7,FGF9,JAK2,KDR,LAMA4,PDGFB,PGR,MAPK1,RAC1,RALA,RAP1A,TGFA,NRP1,ABI1,FLRT2,DNM3,SH3KBP1,PDGFD,COL6A6
13_Member	WikiPathways	WP4172	PI3K-Akt signaling pathway	-4.95437	-2.58006	16/345	2252,2254,2258,3570,3676,3717,3791,3910,5155,5594,5618,5879,7039,54331,80310,131873	FGF7,FGF9,FGF13,IL6R,ITGA4,JAK2,KDR,LAMA4,PDGFB,MAPK1,PRLR,RAC1,TGFA,GNG2,PDGFD,COL6A6
13_Member	WikiPathways	WP3932	Focal adhesion: PI3K-Akt-mTOR-signaling pathway	-4.91345	-2.55354	15/309	2252,2254,2258,2308,3570,3676,3717,3791,3910,5155,5594,5618,54331,80310,113791	FGF7,FGF9,FGF13,FOXO1,IL6R,ITGA4,JAK2,KDR,LAMA4,PDGFB,MAPK1,PRLR,GNG2,PDGFD,PIK3IP1
13_Member	WikiPathways	WP5087	Malignant pleural mesothelioma	-4.66878	-2.38271	18/447	1432,2252,2254,2258,2308,3676,3791,3910,4216,4313,5155,5176,5594,5601,6423,7039,9448,80310	MAPK14,FGF7,FGF9,FGF13,FOXO1,ITGA4,KDR,LAMA4,MAP3K4,MMP2,PDGFB,SERPINF1,MAPK1,MAPK9,SFRP2,TGFA,MAP4K4,PDGFD
13_Member	Reactome Gene Sets	R-HSA-5663202	Diseases of signal transduction by growth factor receptors and second messengers	-4.30514	-2.13743	17/433	2252,2254,2280,2308,3092,3717,3791,5155,5594,5879,5906,6801,7039,7048,54518,55294,55534	FGF7,FGF9,FKBP1A,FOXO1,HIP1,JAK2,KDR,PDGFB,MAPK1,RAC1,RAP1A,STRN,TGFA,TGFBR2,APBB1IP,FBXW7,MAML3
13_Member	KEGG Pathway	hsa04151	PI3K-Akt signaling pathway	-4.23298	-2.08769	15/354	2252,2254,3570,3676,3717,3791,3910,5155,5594,5618,5879,7039,54331,80310,131873	FGF7,FGF9,IL6R,ITGA4,JAK2,KDR,LAMA4,PDGFB,MAPK1,PRLR,RAC1,TGFA,GNG2,PDGFD,COL6A6
13_Member	KEGG Pathway	hsa05200	Pathways in cancer	-4.20047	-2.0633	19/531	113,2252,2254,2308,3162,3570,3601,3717,3910,4313,5155,5594,5601,5879,5898,7039,7048,8031,54331	ADCY7,FGF7,FGF9,FOXO1,HMOX1,IL6R,IL15RA,JAK2,LAMA4,MMP2,PDGFB,MAPK1,MAPK9,RAC1,RALA,TGFA,TGFBR2,NCOA4,GNG2
13_Member	Reactome Gene Sets	R-HSA-2219528	PI3K/AKT Signaling in Cancer	-3.4128	-1.52851	7/104	2252,2254,2308,5155,5879,6801,7039	FGF7,FGF9,FOXO1,PDGFB,RAC1,STRN,TGFA
13_Member	Reactome Gene Sets	R-HSA-6811558	PI5P, PP2A and IER3 Regulate PI3K/AKT Signaling	-3.3626	-1.49448	7/106	2252,2254,5155,5594,5879,6801,7039	FGF7,FGF9,PDGFB,MAPK1,RAC1,STRN,TGFA
13_Member	Reactome Gene Sets	R-HSA-2219530	Constitutive Signaling by Aberrant PI3K in Cancer	-3.30501	-1.45386	6/78	2252,2254,5155,5879,6801,7039	FGF7,FGF9,PDGFB,RAC1,STRN,TGFA
13_Member	Reactome Gene Sets	R-HSA-199418	Negative regulation of the PI3K/AKT network	-3.19563	-1.38424	7/113	2252,2254,5155,5594,5879,6801,7039	FGF7,FGF9,PDGFB,MAPK1,RAC1,STRN,TGFA
13_Member	GO Biological Processes	GO:0051781	positive regulation of cell division	-3.00135	-1.25889	6/89	2252,2254,5155,7039,9371,80310	FGF7,FGF9,PDGFB,TGFA,KIF3B,PDGFD
13_Member	Reactome Gene Sets	R-HSA-5683057	MAPK family signaling cascades	-2.97438	-1.24154	12/325	2252,2254,2308,3570,3717,5155,5593,5594,5879,5906,7039,54518	FGF7,FGF9,FOXO1,IL6R,JAK2,PDGFB,PRKG2,MAPK1,RAC1,RAP1A,TGFA,APBB1IP
13_Member	WikiPathways	WP4872	MAP3K1 role in promoting and blocking gonadal determination	-2.90942	-1.19271	3/17	2254,4216,5594	FGF9,MAP3K4,MAPK1
13_Member	KEGG Pathway	hsa05218	Melanoma	-2.63768	-1.00964	5/72	2252,2254,5155,5594,80310	FGF7,FGF9,PDGFB,MAPK1,PDGFD
13_Member	GO Biological Processes	GO:0051302	regulation of cell division	-2.55055	-0.958973	8/186	2252,2254,5155,6423,7039,9371,80310,341019	FGF7,FGF9,PDGFB,SFRP2,TGFA,KIF3B,PDGFD,DCDC1
13_Member	Reactome Gene Sets	R-HSA-5684996	MAPK1/MAPK3 signaling	-2.4002	-0.863078	10/286	2252,2254,3570,3717,5155,5593,5594,5906,7039,54518	FGF7,FGF9,IL6R,JAK2,PDGFB,PRKG2,MAPK1,RAP1A,TGFA,APBB1IP
13_Member	WikiPathways	WP3931	Embryonic stem cell pluripotency pathways	-2.36343	-0.846046	6/119	658,2252,2254,2258,5155,5594	BMPR1B,FGF7,FGF9,FGF13,PDGFB,MAPK1
13_Member	WikiPathways	WP4787	Osteoblast differentiation and related diseases	-2.34574	-0.8322	6/120	658,1432,2252,2254,5594,5601	BMPR1B,MAPK14,FGF7,FGF9,MAPK1,MAPK9
13_Member	WikiPathways	WP4767	FGFR3 signaling in chondrocyte proliferation and terminal differentiation	-2.31682	-0.815849	3/27	1432,2254,5594	MAPK14,FGF9,MAPK1
13_Member	Canonical Pathways	M5883	NABA SECRETED FACTORS	-2.30643	-0.807933	11/343	2252,2254,2258,2660,5155,6423,7039,25975,56477,80310,113791	FGF7,FGF9,FGF13,MSTN,PDGFB,SFRP2,TGFA,EGFL6,CCL28,PDGFD,PIK3IP1
13_Member	Reactome Gene Sets	R-HSA-9006925	Intracellular signaling by second messengers	-2.1697	-0.714549	10/309	113,2252,2254,2308,5155,5594,5879,6801,7039,64121	ADCY7,FGF7,FGF9,FOXO1,PDGFB,MAPK1,RAC1,STRN,TGFA,RRAGC
13_Member	Reactome Gene Sets	R-HSA-1257604	PIP3 activates AKT signaling	-2.11153	-0.679211	9/267	2252,2254,2308,5155,5594,5879,6801,7039,64121	FGF7,FGF9,FOXO1,PDGFB,MAPK1,RAC1,STRN,TGFA,RRAGC
13_Member	Reactome Gene Sets	R-HSA-5654727	Negative regulation of FGFR2 signaling	-2.0345	-0.629325	3/34	2252,2254,5594	FGF7,FGF9,MAPK1
14_Summary	GO Biological Processes	GO:0007162	negative regulation of cell adhesion	-6.30936	-3.43979	17/305	347,3717,4313,4321,9404,9448,10457,10507,11170,26191,28984,53833,56477,65125,83700,84830,114897,684,968,1432,1604,1803,3162,3598,7009,8111,11213,55294,284021,113,490,5879,79589,114899,5155,114757	APOD,JAK2,MMP2,MMP12,LPXN,MAP4K4,GPNMB,SEMA4D,FAM107A,PTPN22,RGCC,IL20RB,CCL28,WNK1,JAM3,ADTRP,C1QTNF1,BST2,CD68,MAPK14,CD55,DPP4,HMOX1,IL13RA2,TMBIM6,GPR68,IRAK3,FBXW7,MILR1,ADCY7,ATP2B1,RAC1,RNF128,C1QTNF3,PDGFB,CYGB
14_Member	GO Biological Processes	GO:0007162	negative regulation of cell adhesion	-6.30936	-3.43979	17/305	347,3717,4313,4321,9404,9448,10457,10507,11170,26191,28984,53833,56477,65125,83700,84830,114897	APOD,JAK2,MMP2,MMP12,LPXN,MAP4K4,GPNMB,SEMA4D,FAM107A,PTPN22,RGCC,IL20RB,CCL28,WNK1,JAM3,ADTRP,C1QTNF1
14_Member	GO Biological Processes	GO:0002683	negative regulation of immune system process	-6.14461	-3.37771	20/425	347,684,968,1432,1604,1803,3162,3598,4321,7009,8111,9404,10457,11213,26191,53833,55294,56477,84830,284021	APOD,BST2,CD68,MAPK14,CD55,DPP4,HMOX1,IL13RA2,MMP12,TMBIM6,GPR68,LPXN,GPNMB,IRAK3,PTPN22,IL20RB,FBXW7,CCL28,ADTRP,MILR1
14_Member	GO Biological Processes	GO:0001818	negative regulation of cytokine production	-3.05496	-1.29374	13/363	113,347,490,684,3162,5879,10457,11213,26191,28984,53833,79589,114899	ADCY7,APOD,ATP2B1,BST2,HMOX1,RAC1,GPNMB,IRAK3,PTPN22,RGCC,IL20RB,RNF128,C1QTNF3
14_Member	GO Biological Processes	GO:0022408	negative regulation of cell-cell adhesion	-2.95575	-1.2292	9/199	3717,10457,26191,28984,53833,56477,65125,84830,114897	JAK2,GPNMB,PTPN22,RGCC,IL20RB,CCL28,WNK1,ADTRP,C1QTNF1
14_Member	GO Biological Processes	GO:0050866	negative regulation of cell activation	-2.71059	-1.05676	9/216	3162,3598,5155,10457,26191,53833,114757,114897,284021	HMOX1,IL13RA2,PDGFB,GPNMB,PTPN22,IL20RB,CYGB,C1QTNF1,MILR1
15_Summary	GO Biological Processes	GO:0048608	reproductive structure development	-6.24075	-3.38542	20/419	658,677,1432,1508,2254,3791,4216,4313,5155,5241,5594,5618,5654,6423,6781,8031,8644,9420,10265,84870,5087	BMPR1B,ZFP36L1,MAPK14,CTSB,FGF9,KDR,MAP3K4,MMP2,PDGFB,PGR,MAPK1,PRLR,HTRA1,SFRP2,STC1,NCOA4,AKR1C3,CYP7B1,IRX5,RSPO3,PBX1
15_Member	GO Biological Processes	GO:0048608	reproductive structure development	-6.24075	-3.38542	20/419	658,677,1432,1508,2254,3791,4216,4313,5155,5241,5594,5618,5654,6423,6781,8031,8644,9420,10265,84870	BMPR1B,ZFP36L1,MAPK14,CTSB,FGF9,KDR,MAP3K4,MMP2,PDGFB,PGR,MAPK1,PRLR,HTRA1,SFRP2,STC1,NCOA4,AKR1C3,CYP7B1,IRX5,RSPO3
15_Member	GO Biological Processes	GO:0061458	reproductive system development	-6.19245	-3.37771	20/422	658,677,1432,1508,2254,3791,4216,4313,5155,5241,5594,5618,5654,6423,6781,8031,8644,9420,10265,84870	BMPR1B,ZFP36L1,MAPK14,CTSB,FGF9,KDR,MAP3K4,MMP2,PDGFB,PGR,MAPK1,PRLR,HTRA1,SFRP2,STC1,NCOA4,AKR1C3,CYP7B1,IRX5,RSPO3
15_Member	GO Biological Processes	GO:0001890	placenta development	-3.94015	-1.89013	9/146	677,1432,1508,4216,5155,5594,5654,6781,84870	ZFP36L1,MAPK14,CTSB,MAP3K4,PDGFB,MAPK1,HTRA1,STC1,RSPO3
15_Member	GO Biological Processes	GO:0008406	gonad development	-2.69699	-1.04928	9/217	658,2254,3791,4313,5241,6423,8031,8644,10265	BMPR1B,FGF9,KDR,MMP2,PGR,SFRP2,NCOA4,AKR1C3,IRX5
15_Member	GO Biological Processes	GO:0045137	development of primary sexual characteristics	-2.63025	-1.00702	9/222	658,2254,3791,4313,5241,6423,8031,8644,10265	BMPR1B,FGF9,KDR,MMP2,PGR,SFRP2,NCOA4,AKR1C3,IRX5
15_Member	GO Biological Processes	GO:0007548	sex differentiation	-2.5429	-0.95285	10/273	658,2254,3791,4313,5087,5241,6423,8031,8644,10265	BMPR1B,FGF9,KDR,MMP2,PBX1,PGR,SFRP2,NCOA4,AKR1C3,IRX5
16_Summary	KEGG Pathway	hsa04015	Rap1 signaling pathway	-6.21595	-3.37771	14/210	113,1432,2252,2254,3791,5028,5155,5594,5879,5898,5906,23683,54518,80310,3570,3717,5066,5241,5618,7039,7048,9423,5593,5742,6935,2908,1759,26052,54331,23765	ADCY7,MAPK14,FGF7,FGF9,KDR,P2RY1,PDGFB,MAPK1,RAC1,RALA,RAP1A,PRKD3,APBB1IP,PDGFD,IL6R,JAK2,PAM,PGR,PRLR,TGFA,TGFBR2,NTN1,PRKG2,PTGS1,ZEB1,NR3C1,DNM1,DNM3,GNG2,IL17RA
16_Member	KEGG Pathway	hsa04015	Rap1 signaling pathway	-6.21595	-3.37771	14/210	113,1432,2252,2254,3791,5028,5155,5594,5879,5898,5906,23683,54518,80310	ADCY7,MAPK14,FGF7,FGF9,KDR,P2RY1,PDGFB,MAPK1,RAC1,RALA,RAP1A,PRKD3,APBB1IP,PDGFD
16_Member	Reactome Gene Sets	R-HSA-112411	MAPK1 (ERK2) activation	-3.78465	-1.77041	3/9	3570,3717,5594	IL6R,JAK2,MAPK1
16_Member	GO Biological Processes	GO:0030879	mammary gland development	-3.72197	-1.72747	8/123	3717,5066,5241,5594,5618,7039,7048,9423	JAK2,PAM,PGR,MAPK1,PRLR,TGFA,TGFBR2,NTN1
16_Member	KEGG Pathway	hsa04611	Platelet activation	-3.69779	-1.71466	8/124	113,1432,5028,5593,5594,5742,5906,54518	ADCY7,MAPK14,P2RY1,PRKG2,MAPK1,PTGS1,RAP1A,APBB1IP
16_Member	GO Biological Processes	GO:0061180	mammary gland epithelium development	-3.094	-1.31567	5/57	3717,5241,5594,5618,9423	JAK2,PGR,MAPK1,PRLR,NTN1
16_Member	Reactome Gene Sets	R-HSA-187687	Signalling to ERKs	-3.0464	-1.293	4/34	1432,5594,5898,5906	MAPK14,MAPK1,RALA,RAP1A
16_Member	WikiPathways	WP4337	ncRNAs involved in STAT3 signaling in hepatocellular carcinoma	-2.90942	-1.19271	3/17	3570,3717,6935	IL6R,JAK2,ZEB1
16_Member	WikiPathways	WP734	Serotonin receptor 4/6/7 and NR3C signaling	-2.76383	-1.09759	3/19	2908,5594,5906	NR3C1,MAPK1,RAP1A
16_Member	Reactome Gene Sets	R-HSA-166520	Signaling by NTRKs	-2.76303	-1.09759	7/134	1432,1759,5594,5879,5898,5906,26052	MAPK14,DNM1,MAPK1,RAC1,RALA,RAP1A,DNM3
16_Member	WikiPathways	WP2032	Thyroid stimulating hormone (TSH) signaling pathway	-2.74751	-1.08656	5/68	1432,3717,5594,5906,54331	MAPK14,JAK2,MAPK1,RAP1A,GNG2
16_Member	Reactome Gene Sets	R-HSA-9656223	Signaling by RAF1 mutants	-2.66052	-1.0248	4/43	3717,5594,5906,54518	JAK2,MAPK1,RAP1A,APBB1IP
16_Member	WikiPathways	WP364	IL-6 signaling pathway	-2.66052	-1.0248	4/43	3570,3717,5594,5879	IL6R,JAK2,MAPK1,RAC1
16_Member	Reactome Gene Sets	R-HSA-112409	RAF-independent MAPK1/3 activation	-2.51835	-0.941356	3/23	3570,3717,5594	IL6R,JAK2,MAPK1
16_Member	Reactome Gene Sets	R-HSA-6802946	Signaling by moderate kinase activity BRAF mutants	-2.51793	-0.941356	4/47	3717,5594,5906,54518	JAK2,MAPK1,RAP1A,APBB1IP
16_Member	Reactome Gene Sets	R-HSA-6802949	Signaling by RAS mutants	-2.51793	-0.941356	4/47	3717,5594,5906,54518	JAK2,MAPK1,RAP1A,APBB1IP
16_Member	Reactome Gene Sets	R-HSA-6802955	Paradoxical activation of RAF signaling by kinase inactive BRAF	-2.51793	-0.941356	4/47	3717,5594,5906,54518	JAK2,MAPK1,RAP1A,APBB1IP
16_Member	Reactome Gene Sets	R-HSA-9649948	Signaling downstream of RAS mutants	-2.51793	-0.941356	4/47	3717,5594,5906,54518	JAK2,MAPK1,RAP1A,APBB1IP
16_Member	Reactome Gene Sets	R-HSA-982772	Growth hormone receptor signaling	-2.46446	-0.90594	3/24	3717,5594,5618	JAK2,MAPK1,PRLR
16_Member	Reactome Gene Sets	R-HSA-187037	Signaling by NTRK1 (TRKA)	-2.43613	-0.886711	6/115	1432,1759,5594,5898,5906,26052	MAPK14,DNM1,MAPK1,RALA,RAP1A,DNM3
16_Member	WikiPathways	WP2112	IL-17 signaling pathway	-2.10787	-0.679211	3/32	3717,5594,23765	JAK2,MAPK1,IL17RA
16_Member	Canonical Pathways	M233	PID EPO PATHWAY	-2.07055	-0.652257	3/33	1432,3717,5906	MAPK14,JAK2,RAP1A
16_Member	Canonical Pathways	M270	PID MAPK TRK PATHWAY	-2.0345	-0.629325	3/34	1432,5594,5906	MAPK14,MAPK1,RAP1A
17_Summary	Reactome Gene Sets	R-HSA-449147	Signaling by Interleukins	-6.17865	-3.37771	21/462	1432,1901,2308,3162,3554,3570,3598,3601,3717,4128,4313,5306,5594,5601,5898,6935,8808,11213,23765,53833,58985,80854,684,5618,7706,658,2660,7048,51554,56477,677,2730,3676,5155,8867,26577,64388,65125	MAPK14,S1PR1,FOXO1,HMOX1,IL1R1,IL6R,IL13RA2,IL15RA,JAK2,MAOA,MMP2,PITPNA,MAPK1,MAPK9,RALA,ZEB1,IL1RL2,IRAK3,IL17RA,IL20RB,IL22RA1,SETD7,BST2,PRLR,TRIM25,BMPR1B,MSTN,TGFBR2,ACKR4,CCL28,ZFP36L1,GCLM,ITGA4,PDGFB,SYNJ1,PCOLCE2,GREM2,WNK1
17_Member	Reactome Gene Sets	R-HSA-449147	Signaling by Interleukins	-6.17865	-3.37771	21/462	1432,1901,2308,3162,3554,3570,3598,3601,3717,4128,4313,5306,5594,5601,5898,6935,8808,11213,23765,53833,58985	MAPK14,S1PR1,FOXO1,HMOX1,IL1R1,IL6R,IL13RA2,IL15RA,JAK2,MAOA,MMP2,PITPNA,MAPK1,MAPK9,RALA,ZEB1,IL1RL2,IRAK3,IL17RA,IL20RB,IL22RA1
17_Member	WikiPathways	WP4538	Regulatory circuits of the STAT3 signaling pathway	-6.11141	-3.36679	9/79	1432,3570,3601,3717,5594,5601,53833,58985,80854	MAPK14,IL6R,IL15RA,JAK2,MAPK1,MAPK9,IL20RB,IL22RA1,SETD7
17_Member	Reactome Gene Sets	R-HSA-1280215	Cytokine Signaling in Immune system	-4.70245	-2.40108	24/715	684,1432,1901,2308,3162,3554,3570,3598,3601,3717,4128,4313,5306,5594,5601,5618,5898,6935,7706,8808,11213,23765,53833,58985	BST2,MAPK14,S1PR1,FOXO1,HMOX1,IL1R1,IL6R,IL13RA2,IL15RA,JAK2,MAOA,MMP2,PITPNA,MAPK1,MAPK9,PRLR,RALA,ZEB1,TRIM25,IL1RL2,IRAK3,IL17RA,IL20RB,IL22RA1
17_Member	KEGG Pathway	hsa04060	Cytokine-cytokine receptor interaction	-4.51693	-2.28143	14/295	658,2660,3554,3570,3598,3601,5618,7048,8808,23765,51554,53833,56477,58985	BMPR1B,MSTN,IL1R1,IL6R,IL13RA2,IL15RA,PRLR,TGFBR2,IL1RL2,IL17RA,ACKR4,IL20RB,CCL28,IL22RA1
17_Member	GO Biological Processes	GO:0034097	response to cytokine	-4.37393	-2.18258	25/799	677,684,1432,2730,3554,3570,3598,3601,3676,3717,4313,5155,5594,5618,7706,8808,8867,11213,23765,26577,51554,53833,58985,64388,65125	ZFP36L1,BST2,MAPK14,GCLM,IL1R1,IL6R,IL13RA2,IL15RA,ITGA4,JAK2,MMP2,PDGFB,MAPK1,PRLR,TRIM25,IL1RL2,SYNJ1,IRAK3,IL17RA,PCOLCE2,ACKR4,IL20RB,IL22RA1,GREM2,WNK1
17_Member	GO Biological Processes	GO:0071345	cellular response to cytokine stimulus	-4.35931	-2.17399	23/703	677,1432,2730,3554,3570,3598,3601,3676,3717,4313,5155,5594,5618,7706,8808,11213,23765,26577,51554,53833,58985,64388,65125	ZFP36L1,MAPK14,GCLM,IL1R1,IL6R,IL13RA2,IL15RA,ITGA4,JAK2,MMP2,PDGFB,MAPK1,PRLR,TRIM25,IL1RL2,IRAK3,IL17RA,PCOLCE2,ACKR4,IL20RB,IL22RA1,GREM2,WNK1
17_Member	GO Biological Processes	GO:0019221	cytokine-mediated signaling pathway	-4.26067	-2.10988	15/352	3554,3570,3598,3601,3717,5155,5618,8808,11213,23765,51554,53833,58985,64388,65125	IL1R1,IL6R,IL13RA2,IL15RA,JAK2,PDGFB,PRLR,IL1RL2,IRAK3,IL17RA,ACKR4,IL20RB,IL22RA1,GREM2,WNK1
17_Member	KEGG Pathway	hsa04630	JAK-STAT signaling pathway	-2.92654	-1.20311	8/162	3570,3598,3601,3717,5155,5618,53833,58985	IL6R,IL13RA2,IL15RA,JAK2,PDGFB,PRLR,IL20RB,IL22RA1
17_Member	Reactome Gene Sets	R-HSA-8854691	Interleukin-20 family signaling	-2.41303	-0.872015	3/25	3717,53833,58985	JAK2,IL20RB,IL22RA1
17_Member	KEGG Pathway	hsa04061	Viral protein interaction with cytokine and cytokine receptor	-2.03216	-0.627975	5/100	3570,51554,53833,56477,58985	IL6R,ACKR4,IL20RB,CCL28,IL22RA1
18_Summary	GO Biological Processes	GO:0006935	chemotaxis	-6.12239	-3.36679	22/506	658,1432,1803,1901,2252,3570,5155,5168,5594,5879,5898,8829,9420,9423,9638,10457,10507,23114,23765,23768,51554,56477,287,783,1759,3786,4313,5306,7222,8650,8913,22885,26052,30011,57522,131873,220164,3676,4891,6781,9404,9448,10006,10630,11149,23136,84168,151354,221692,347,3717,6801,443,5176,8111,8867,133308	BMPR1B,MAPK14,DPP4,S1PR1,FGF7,IL6R,PDGFB,ENPP2,MAPK1,RAC1,RALA,NRP1,CYP7B1,NTN1,FEZ1,GPNMB,SEMA4D,NFASC,IL17RA,FLRT2,ACKR4,CCL28,ANK2,CACNB2,DNM1,KCNQ3,MMP2,PITPNA,TRPC3,NUMB,CACNA1G,ABLIM3,DNM3,SH3KBP1,SRGAP1,COL6A6,DOK6,ITGA4,SLC11A2,STC1,LPXN,MAP4K4,ABI1,PDPN,BVES,EPB41L3,ANTXR1,LRATD1,PHACTR1,APOD,JAK2,STRN,ASPA,SERPINF1,GPR68,SYNJ1,SLC9B2
18_Member	GO Biological Processes	GO:0006935	chemotaxis	-6.12239	-3.36679	22/506	658,1432,1803,1901,2252,3570,5155,5168,5594,5879,5898,8829,9420,9423,9638,10457,10507,23114,23765,23768,51554,56477	BMPR1B,MAPK14,DPP4,S1PR1,FGF7,IL6R,PDGFB,ENPP2,MAPK1,RAC1,RALA,NRP1,CYP7B1,NTN1,FEZ1,GPNMB,SEMA4D,NFASC,IL17RA,FLRT2,ACKR4,CCL28
18_Member	GO Biological Processes	GO:0042330	taxis	-6.06574	-3.3535	22/510	658,1432,1803,1901,2252,3570,5155,5168,5594,5879,5898,8829,9420,9423,9638,10457,10507,23114,23765,23768,51554,56477	BMPR1B,MAPK14,DPP4,S1PR1,FGF7,IL6R,PDGFB,ENPP2,MAPK1,RAC1,RALA,NRP1,CYP7B1,NTN1,FEZ1,GPNMB,SEMA4D,NFASC,IL17RA,FLRT2,ACKR4,CCL28
18_Member	Reactome Gene Sets	R-HSA-422475	Axon guidance	-5.50609	-2.93026	22/552	287,783,1432,1759,3786,4313,5306,5594,5879,7222,8650,8829,8913,9423,10507,22885,23114,26052,30011,57522,131873,220164	ANK2,CACNB2,MAPK14,DNM1,KCNQ3,MMP2,PITPNA,MAPK1,RAC1,TRPC3,NUMB,NRP1,CACNA1G,NTN1,SEMA4D,ABLIM3,NFASC,DNM3,SH3KBP1,SRGAP1,COL6A6,DOK6
18_Member	Reactome Gene Sets	R-HSA-9675108	Nervous system development	-5.20088	-2.74629	22/577	287,783,1432,1759,3786,4313,5306,5594,5879,7222,8650,8829,8913,9423,10507,22885,23114,26052,30011,57522,131873,220164	ANK2,CACNB2,MAPK14,DNM1,KCNQ3,MMP2,PITPNA,MAPK1,RAC1,TRPC3,NUMB,NRP1,CACNA1G,NTN1,SEMA4D,ABLIM3,NFASC,DNM3,SH3KBP1,SRGAP1,COL6A6,DOK6
18_Member	GO Biological Processes	GO:0000902	cell morphogenesis	-4.18884	-2.05699	22/673	658,1432,3676,4891,5879,6781,8650,8829,9404,9423,9448,9638,10006,10507,10630,11149,23114,23136,23768,84168,151354,221692	BMPR1B,MAPK14,ITGA4,SLC11A2,RAC1,STC1,NUMB,NRP1,LPXN,NTN1,MAP4K4,FEZ1,ABI1,SEMA4D,PDPN,BVES,NFASC,EPB41L3,FLRT2,ANTXR1,LRATD1,PHACTR1
18_Member	GO Biological Processes	GO:0000904	cell morphogenesis involved in differentiation	-3.34617	-1.48093	17/522	658,3676,4891,5879,6781,8650,8829,9404,9423,9638,10006,10507,11149,23114,23768,84168,221692	BMPR1B,ITGA4,SLC11A2,RAC1,STC1,NUMB,NRP1,LPXN,NTN1,FEZ1,ABI1,SEMA4D,BVES,NFASC,FLRT2,ANTXR1,PHACTR1
18_Member	KEGG Pathway	hsa04360	Axon guidance	-3.23055	-1.405	9/182	658,5594,5879,7222,8829,9423,10507,22885,57522	BMPR1B,MAPK1,RAC1,TRPC3,NRP1,NTN1,SEMA4D,ABLIM3,SRGAP1
18_Member	GO Biological Processes	GO:0031175	neuron projection development	-3.1901	-1.37997	19/639	347,658,3676,3717,4313,4891,5879,6801,8650,8829,9423,9448,9638,10006,10507,23114,23136,23768,221692	APOD,BMPR1B,ITGA4,JAK2,MMP2,SLC11A2,RAC1,STRN,NUMB,NRP1,NTN1,MAP4K4,FEZ1,ABI1,SEMA4D,NFASC,EPB41L3,FLRT2,PHACTR1
18_Member	GO Biological Processes	GO:0048812	neuron projection morphogenesis	-3.07079	-1.3016	15/455	658,3676,4891,5879,8650,8829,9423,9448,9638,10006,10507,23114,23136,23768,221692	BMPR1B,ITGA4,SLC11A2,RAC1,NUMB,NRP1,NTN1,MAP4K4,FEZ1,ABI1,SEMA4D,NFASC,EPB41L3,FLRT2,PHACTR1
18_Member	GO Biological Processes	GO:0120039	plasma membrane bounded cell projection morphogenesis	-3.03272	-1.28043	15/459	658,3676,4891,5879,8650,8829,9423,9448,9638,10006,10507,23114,23136,23768,221692	BMPR1B,ITGA4,SLC11A2,RAC1,NUMB,NRP1,NTN1,MAP4K4,FEZ1,ABI1,SEMA4D,NFASC,EPB41L3,FLRT2,PHACTR1
18_Member	GO Biological Processes	GO:0048858	cell projection morphogenesis	-2.99515	-1.25484	15/463	658,3676,4891,5879,8650,8829,9423,9448,9638,10006,10507,23114,23136,23768,221692	BMPR1B,ITGA4,SLC11A2,RAC1,NUMB,NRP1,NTN1,MAP4K4,FEZ1,ABI1,SEMA4D,NFASC,EPB41L3,FLRT2,PHACTR1
18_Member	GO Biological Processes	GO:0061564	axon development	-2.87597	-1.17175	13/380	347,658,3676,3717,4313,5879,8650,8829,9423,9638,10507,23114,23768	APOD,BMPR1B,ITGA4,JAK2,MMP2,RAC1,NUMB,NRP1,NTN1,FEZ1,SEMA4D,NFASC,FLRT2
18_Member	GO Biological Processes	GO:0032990	cell part morphogenesis	-2.82333	-1.13083	15/482	658,3676,4891,5879,8650,8829,9423,9448,9638,10006,10507,23114,23136,23768,221692	BMPR1B,ITGA4,SLC11A2,RAC1,NUMB,NRP1,NTN1,MAP4K4,FEZ1,ABI1,SEMA4D,NFASC,EPB41L3,FLRT2,PHACTR1
18_Member	GO Biological Processes	GO:0048667	cell morphogenesis involved in neuron differentiation	-2.57866	-0.972557	13/411	658,3676,4891,5879,8650,8829,9423,9638,10006,10507,23114,23768,221692	BMPR1B,ITGA4,SLC11A2,RAC1,NUMB,NRP1,NTN1,FEZ1,ABI1,SEMA4D,NFASC,FLRT2,PHACTR1
18_Member	GO Biological Processes	GO:0032989	cellular component morphogenesis	-2.50336	-0.932083	16/573	287,658,3676,4891,5879,8650,8829,9423,9448,9638,10006,10507,23114,23136,23768,221692	ANK2,BMPR1B,ITGA4,SLC11A2,RAC1,NUMB,NRP1,NTN1,MAP4K4,FEZ1,ABI1,SEMA4D,NFASC,EPB41L3,FLRT2,PHACTR1
18_Member	GO Biological Processes	GO:0010720	positive regulation of cell development	-2.28666	-0.794885	10/297	443,5176,5879,8111,8650,8829,8867,9423,10507,133308	ASPA,SERPINF1,RAC1,GPR68,NUMB,NRP1,SYNJ1,NTN1,SEMA4D,SLC9B2
18_Member	GO Biological Processes	GO:0007411	axon guidance	-2.03991	-0.631982	8/227	658,5879,8829,9423,9638,10507,23114,23768	BMPR1B,RAC1,NRP1,NTN1,FEZ1,SEMA4D,NFASC,FLRT2
18_Member	GO Biological Processes	GO:0097485	neuron projection guidance	-2.0291	-0.625765	8/228	658,5879,8829,9423,9638,10507,23114,23768	BMPR1B,RAC1,NRP1,NTN1,FEZ1,SEMA4D,NFASC,FLRT2
19_Summary	GO Biological Processes	GO:0009611	response to wounding	-6.06589	-3.3535	20/430	308,347,677,1432,2004,2157,2252,3162,3717,3791,4313,4321,5028,5155,5627,5879,7039,7048,10630,22875,5594,5906,7222,54331,54518,135228,490,3676,5593,9371,83700,5066,5618,56603,65125,84830,114897	ANXA5,APOD,ZFP36L1,MAPK14,ELK3,F8,FGF7,HMOX1,JAK2,KDR,MMP2,MMP12,P2RY1,PDGFB,PROS1,RAC1,TGFA,TGFBR2,PDPN,ENPP4,MAPK1,RAP1A,TRPC3,GNG2,APBB1IP,CD109,ATP2B1,ITGA4,PRKG2,KIF3B,JAM3,PAM,PRLR,CYP26B1,WNK1,ADTRP,C1QTNF1
19_Member	GO Biological Processes	GO:0009611	response to wounding	-6.06589	-3.3535	20/430	308,347,677,1432,2004,2157,2252,3162,3717,3791,4313,4321,5028,5155,5627,5879,7039,7048,10630,22875	ANXA5,APOD,ZFP36L1,MAPK14,ELK3,F8,FGF7,HMOX1,JAK2,KDR,MMP2,MMP12,P2RY1,PDGFB,PROS1,RAC1,TGFA,TGFBR2,PDPN,ENPP4
19_Member	Reactome Gene Sets	R-HSA-76002	Platelet activation, signaling and aggregation	-5.07257	-2.6397	14/263	308,1432,2157,5028,5155,5594,5627,5879,5906,7222,10630,54331,54518,135228	ANXA5,MAPK14,F8,P2RY1,PDGFB,MAPK1,PROS1,RAC1,RAP1A,TRPC3,PDPN,GNG2,APBB1IP,CD109
19_Member	Reactome Gene Sets	R-HSA-109582	Hemostasis	-3.77388	-1.76239	20/621	308,490,1432,2157,3676,3717,5028,5155,5593,5594,5627,5879,5906,7222,9371,10630,54331,54518,83700,135228	ANXA5,ATP2B1,MAPK14,F8,ITGA4,JAK2,P2RY1,PDGFB,PRKG2,MAPK1,PROS1,RAC1,RAP1A,TRPC3,KIF3B,PDPN,GNG2,APBB1IP,JAM3,CD109
19_Member	GO Biological Processes	GO:0050878	regulation of body fluid levels	-3.5316	-1.61557	14/366	308,1432,2157,5028,5066,5155,5618,5627,10630,22875,56603,65125,84830,114897	ANXA5,MAPK14,F8,P2RY1,PAM,PDGFB,PRLR,PROS1,PDPN,ENPP4,CYP26B1,WNK1,ADTRP,C1QTNF1
19_Member	GO Biological Processes	GO:0042060	wound healing	-3.49029	-1.59385	13/326	308,1432,2004,2157,3162,3791,4321,5028,5627,7039,7048,10630,22875	ANXA5,MAPK14,ELK3,F8,HMOX1,KDR,MMP12,P2RY1,PROS1,TGFA,TGFBR2,PDPN,ENPP4
19_Member	GO Biological Processes	GO:0007596	blood coagulation	-2.16609	-0.712715	7/172	308,1432,2157,5028,5627,10630,22875	ANXA5,MAPK14,F8,P2RY1,PROS1,PDPN,ENPP4
19_Member	GO Biological Processes	GO:0050817	coagulation	-2.13963	-0.697115	7/174	308,1432,2157,5028,5627,10630,22875	ANXA5,MAPK14,F8,P2RY1,PROS1,PDPN,ENPP4
19_Member	GO Biological Processes	GO:0007599	hemostasis	-2.10069	-0.67413	7/177	308,1432,2157,5028,5627,10630,22875	ANXA5,MAPK14,F8,P2RY1,PROS1,PDPN,ENPP4
20_Summary	GO Biological Processes	GO:0002685	regulation of leukocyte migration	-6.02136	-3.32789	14/218	347,1803,2660,3162,3554,3570,3676,5594,5879,56477,65125,80310,83700,84830,6423,9404	APOD,DPP4,MSTN,HMOX1,IL1R1,IL6R,ITGA4,MAPK1,RAC1,CCL28,WNK1,PDGFD,JAM3,ADTRP,SFRP2,LPXN
20_Member	GO Biological Processes	GO:0002685	regulation of leukocyte migration	-6.02136	-3.32789	14/218	347,1803,2660,3162,3554,3570,3676,5594,5879,56477,65125,80310,83700,84830	APOD,DPP4,MSTN,HMOX1,IL1R1,IL6R,ITGA4,MAPK1,RAC1,CCL28,WNK1,PDGFD,JAM3,ADTRP
20_Member	GO Biological Processes	GO:0002687	positive regulation of leukocyte migration	-4.05611	-1.97417	9/141	2660,3554,3570,3676,5594,5879,65125,80310,83700	MSTN,IL1R1,IL6R,ITGA4,MAPK1,RAC1,WNK1,PDGFD,JAM3
20_Member	GO Biological Processes	GO:0033628	regulation of cell adhesion mediated by integrin	-3.4416	-1.54976	5/48	1803,6423,9404,65125,83700	DPP4,SFRP2,LPXN,WNK1,JAM3
20_Member	GO Biological Processes	GO:0071622	regulation of granulocyte chemotaxis	-3.31788	-1.45845	5/51	1803,2660,5594,5879,83700	DPP4,MSTN,MAPK1,RAC1,JAM3
20_Member	GO Biological Processes	GO:0002688	regulation of leukocyte chemotaxis	-2.95755	-1.22996	7/124	1803,2660,3570,5594,5879,65125,83700	DPP4,MSTN,IL6R,MAPK1,RAC1,WNK1,JAM3
20_Member	GO Biological Processes	GO:1902622	regulation of neutrophil migration	-2.58739	-0.978298	4/45	1803,3554,5879,83700	DPP4,IL1R1,RAC1,JAM3
20_Member	GO Biological Processes	GO:0002690	positive regulation of leukocyte chemotaxis	-2.14262	-0.69957	5/94	2660,3570,5594,5879,65125	MSTN,IL6R,MAPK1,RAC1,WNK1
20_Member	GO Biological Processes	GO:0090022	regulation of neutrophil chemotaxis	-2.07055	-0.652257	3/33	1803,5879,83700	DPP4,RAC1,JAM3
