# Supplementary material for: Transcriptional profiling of Hutchinson-Gilford Progeria syndrome fibroblasts reveals deficits in mesenchymal stem cell commitment to differentiation related to early events in endochondral ossification
Source: eLife journal article supplement (doi:10.7554/elife.81290), 2022-12-29
Supplement: table2-data1 [file metascape_result.xlsx]

## Sheet: Annotation
MyList	Gene ID	Type	Tax ID	Homologene Gene ID	Homologene Gene Tax ID	Gene Symbol	Description	Biological Process (GO)	Kinase Class (UniProt)	Protein Function (Protein Atlas)	Subcellular Location (Protein Atlas)	Drug (DrugBank)	Canonical Pathways	Hallmark Gene Sets	R-HSA-3214815 HDACs deacetylate histones	R-HSA-5689901 Metalloprotease DUBs	R-HSA-1266695 Interleukin-7 signaling	R-HSA-8866654 E3 ubiquitin ligases ubiquitin	R-HSA-140342 Apoptosis induced DNA fragment	hsa05200 Pathways in cancer	GO:0048858 cell projection morphogenesis	R-HSA-422475 Axon guidance	GO:0007169 transmembrane receptor protein	hsa04390 Hippo signaling pathway	R-HSA-8939243 RUNX1 interacts with co-factor	GO:0001503 ossification	M5887 NABA BASEMENT MEMBRANES	GO:0070493 thrombin-activated receptor si	GO:0001775 cell activation	R-HSA-5683057 MAPK family signaling cascades	WP2839 Hair follicle development: org	GO:0048514 blood vessel morphogenesis	GO:0034765 regulation of ion transmembran	GO:0048640 negative regulation of develop
RMRP	6023	symbol	H. sapiens	6023	H. sapiens	RMRP	RNA component of mitochondrial RNA processing endoribonuclease	GO:0062103 double-stranded RNA biosynthetic process;GO:1903704 negative regulation of production of siRNA involved in RNA interference;GO:1900369 negative regulation of RNA interference							1.0	0.0	0.0	0.0	0.0	0.0	0.0	0.0	0.0	0.0	0.0	0.0	0.0	0.0	0.0	0.0	0.0	0.0	0.0	0.0
RPPH1	85495	symbol	H. sapiens	85495	H. sapiens	RPPH1	ribonuclease P RNA component H1	GO:0090502 RNA phosphodiester bond hydrolysis, endonucleolytic;GO:0008033 tRNA processing;GO:0090501 RNA phosphodiester bond hydrolysis							0.0	0.0	0.0	0.0	0.0	0.0	0.0	0.0	0.0	0.0	0.0	0.0	0.0	0.0	0.0	0.0	0.0	0.0	0.0	0.0
LOC728392	728392	Gene_ID	H. sapiens	728392	H. sapiens	LOC728392	uncharacterized LOC728392								0.0	0.0	0.0	0.0	0.0	0.0	0.0	0.0	0.0	0.0	0.0	0.0	0.0	0.0	0.0	0.0	0.0	0.0	0.0	0.0
HIST1H3E	8353	gene_synonym	H. sapiens	8353	H. sapiens	H3C6	H3 clustered histone 6	GO:0006335 DNA replication-dependent chromatin assembly;GO:0034723 DNA replication-dependent chromatin organization;GO:0032200 telomere organization		Predicted intracellular proteins; Disease related genes					1.0	0.0	1.0	0.0	0.0	0.0	0.0	0.0	0.0	0.0	0.0	0.0	0.0	0.0	0.0	0.0	0.0	0.0	0.0	0.0
HIST1H2BC	3017	gene_synonym	H. sapiens	3017	H. sapiens	H2BC5	H2B clustered histone 5	GO:0006334 nucleosome assembly;GO:0031497 chromatin assembly;GO:0034728 nucleosome organization		Predicted intracellular proteins	Nucleoplasm (Approved); Additional: Cytosol				1.0	1.0	0.0	1.0	0.0	0.0	0.0	0.0	0.0	0.0	0.0	0.0	0.0	0.0	0.0	0.0	0.0	0.0	0.0	0.0
SNORA48	652965	symbol	H. sapiens	652965	H. sapiens	SNORA48	small nucleolar RNA, H/ACA box 48	GO:0006396 RNA processing;GO:0016070 RNA metabolic process;GO:0010467 gene expression							0.0	0.0	0.0	0.0	0.0	0.0	0.0	0.0	0.0	0.0	0.0	0.0	0.0	0.0	0.0	0.0	0.0	0.0	0.0	0.0
HIST2H3D	653604	gene_synonym	H. sapiens	653604	H. sapiens	H3C13	H3 clustered histone 13	GO:0006334 nucleosome assembly;GO:0031497 chromatin assembly;GO:0034728 nucleosome organization		Predicted intracellular proteins					1.0	0.0	1.0	0.0	0.0	0.0	0.0	0.0	0.0	0.0	0.0	0.0	0.0	0.0	0.0	0.0	0.0	0.0	0.0	0.0
BMP8B	656	symbol	H. sapiens	656	H. sapiens	BMP8B	bone morphogenetic protein 8b	GO:0010862 positive regulation of pathway-restricted SMAD protein phosphorylation;GO:0060395 SMAD protein signal transduction;GO:0060393 regulation of pathway-restricted SMAD protein phosphorylation		Predicted secreted proteins	Vesicles (Approved)		(M5883)NABA SECRETED FACTORS; (M5885)NABA MATRISOME ASSOCIATED; (M5889)NABA MATRISOME		0.0	0.0	0.0	0.0	0.0	0.0	0.0	0.0	1.0	1.0	0.0	1.0	0.0	0.0	0.0	1.0	0.0	0.0	0.0	0.0
SNORA73B	26768	symbol	H. sapiens	26768	H. sapiens	SNORA73B	small nucleolar RNA, H/ACA box 73B	GO:0006396 RNA processing;GO:0016070 RNA metabolic process;GO:0010467 gene expression							0.0	0.0	0.0	0.0	0.0	0.0	0.0	0.0	0.0	0.0	0.0	0.0	0.0	0.0	0.0	0.0	0.0	0.0	0.0	0.0
HIST1H4H	8365	gene_synonym	H. sapiens	8365	H. sapiens	H4C8	H4 clustered histone 8	GO:0045653 negative regulation of megakaryocyte differentiation;GO:0006335 DNA replication-dependent chromatin assembly;GO:0034723 DNA replication-dependent chromatin organization		Predicted intracellular proteins; Disease related genes					1.0	0.0	0.0	0.0	0.0	0.0	0.0	0.0	0.0	0.0	0.0	0.0	0.0	0.0	0.0	0.0	0.0	0.0	0.0	0.0
HIST2H2AB	317772	gene_synonym	H. sapiens	317772	H. sapiens	H2AC21	H2A clustered histone 21	GO:0008150 biological_process		Predicted intracellular proteins	Nucleoplasm (Supported)				1.0	1.0	0.0	0.0	0.0	0.0	0.0	0.0	0.0	0.0	0.0	0.0	0.0	0.0	0.0	0.0	0.0	0.0	0.0	0.0
HIST1H2BJ	8970	gene_synonym	H. sapiens	8970	H. sapiens	H2BC11	H2B clustered histone 11	GO:0002227 innate immune response in mucosa;GO:0010804 negative regulation of tumor necrosis factor-mediated signaling pathway;GO:0002385 mucosal immune response		Predicted intracellular proteins	Nucleoplasm (Approved); Additional: Cytosol				1.0	1.0	0.0	1.0	0.0	0.0	0.0	0.0	0.0	0.0	0.0	0.0	0.0	0.0	0.0	0.0	0.0	0.0	0.0	0.0
SNORA63	6043	symbol	H. sapiens	6043	H. sapiens	SNORA63	small nucleolar RNA, H/ACA box 63	GO:0006396 RNA processing;GO:0016070 RNA metabolic process;GO:0010467 gene expression							0.0	0.0	0.0	0.0	0.0	0.0	0.0	0.0	0.0	0.0	0.0	0.0	0.0	0.0	0.0	0.0	0.0	0.0	0.0	0.0
LONRF2	164832	symbol	H. sapiens	164832	H. sapiens	LONRF2	LON peptidase N-terminal domain and ring finger 2			Predicted intracellular proteins	Nucleoplasm (Approved)				0.0	0.0	0.0	0.0	0.0	0.0	0.0	0.0	0.0	0.0	0.0	0.0	0.0	0.0	0.0	0.0	0.0	0.0	0.0	0.0
HIST1H2AE	3012	gene_synonym	H. sapiens	3012	H. sapiens	H2AC8	H2A clustered histone 8	GO:0008285 negative regulation of cell population proliferation;GO:0042127 regulation of cell population proliferation;GO:0048523 negative regulation of cellular process		Predicted intracellular proteins	Nucleoplasm (Supported)				1.0	1.0	0.0	0.0	0.0	0.0	0.0	0.0	0.0	0.0	0.0	0.0	0.0	0.0	0.0	0.0	0.0	0.0	0.0	0.0
SNORD17	692086	symbol	H. sapiens	692086	H. sapiens	SNORD17	small nucleolar RNA, C/D box 17	GO:0006396 RNA processing;GO:0016070 RNA metabolic process;GO:0010467 gene expression							0.0	0.0	0.0	0.0	0.0	0.0	0.0	0.0	0.0	0.0	0.0	0.0	0.0	0.0	0.0	0.0	0.0	0.0	0.0	0.0
HIST1H3H	8357	gene_synonym	H. sapiens	8357	H. sapiens	H3C10	H3 clustered histone 10	GO:0006335 DNA replication-dependent chromatin assembly;GO:0034723 DNA replication-dependent chromatin organization;GO:0032200 telomere organization		Predicted intracellular proteins; Disease related genes					1.0	0.0	1.0	0.0	0.0	0.0	0.0	0.0	0.0	0.0	0.0	0.0	0.0	0.0	0.0	0.0	0.0	0.0	0.0	0.0
HIST1H4A	8359	gene_synonym	H. sapiens	8359	H. sapiens	H4C1	H4 clustered histone 1	GO:0045653 negative regulation of megakaryocyte differentiation;GO:0006335 DNA replication-dependent chromatin assembly;GO:0034723 DNA replication-dependent chromatin organization		Predicted intracellular proteins; Disease related genes					1.0	0.0	0.0	0.0	0.0	0.0	0.0	0.0	0.0	0.0	0.0	0.0	0.0	0.0	0.0	0.0	0.0	0.0	0.0	0.0
SNORA57	692158	symbol	H. sapiens	692158	H. sapiens	SNORA57	small nucleolar RNA, H/ACA box 57	GO:0006396 RNA processing;GO:0016070 RNA metabolic process;GO:0010467 gene expression							0.0	0.0	0.0	0.0	0.0	0.0	0.0	0.0	0.0	0.0	0.0	0.0	0.0	0.0	0.0	0.0	0.0	0.0	0.0	0.0
HIST1H1A	3024	gene_synonym	H. sapiens	3024	H. sapiens	H1-1	H1.1 linker histone, cluster member	GO:0016584 nucleosome positioning;GO:0030261 chromosome condensation;GO:0045910 negative regulation of DNA recombination		Predicted intracellular proteins	Nucleoplasm (Supported)				1.0	0.0	0.0	0.0	1.0	0.0	0.0	0.0	0.0	0.0	0.0	0.0	0.0	0.0	0.0	0.0	0.0	0.0	0.0	0.0
HMX3	340784	symbol	H. sapiens	340784	H. sapiens	HMX3	H6 family homeobox 3	GO:0007566 embryo implantation;GO:0050885 neuromuscular process controlling balance;GO:0060135 maternal process involved in female pregnancy		Transcription factors:Helix-turn-helix domains; Predicted intracellular proteins	Nucleoplasm (Approved); Additional: Centriolar satellite				0.0	0.0	0.0	0.0	0.0	0.0	0.0	0.0	0.0	0.0	0.0	0.0	0.0	0.0	0.0	0.0	0.0	0.0	0.0	0.0
NRK	203447	symbol	H. sapiens	203447	H. sapiens	NRK	Nik related kinase	GO:0031532 actin cytoskeleton reorganization;GO:0000165 MAPK cascade;GO:0048812 neuron projection morphogenesis	STE Ser/Thr protein kinase family	Enzymes; Kinases:STE Ser/Thr protein kinases; Predicted intracellular proteins; ENZYME proteins:Transferases	Cytosol;Nucleoplasm (Approved)		(M128)PID TNF PATHWAY		0.0	0.0	0.0	0.0	0.0	0.0	1.0	0.0	0.0	0.0	0.0	0.0	0.0	0.0	0.0	0.0	0.0	0.0	0.0	0.0
SNORA84	100124534	symbol	H. sapiens	100124534	H. sapiens	SNORA84	small nucleolar RNA, H/ACA box 84	GO:0006396 RNA processing;GO:0016070 RNA metabolic process;GO:0010467 gene expression							0.0	0.0	0.0	0.0	0.0	0.0	0.0	0.0	0.0	0.0	0.0	0.0	0.0	0.0	0.0	0.0	0.0	0.0	0.0	0.0
HIST1H4K	8362	gene_synonym	H. sapiens	8362	H. sapiens	H4C12	H4 clustered histone 12	GO:0045653 negative regulation of megakaryocyte differentiation;GO:0006335 DNA replication-dependent chromatin assembly;GO:0034723 DNA replication-dependent chromatin organization		Predicted intracellular proteins; Disease related genes					1.0	0.0	0.0	0.0	0.0	0.0	0.0	0.0	0.0	0.0	0.0	0.0	0.0	0.0	0.0	0.0	0.0	0.0	0.0	0.0
SCARNA12	677777	symbol	H. sapiens	677777	H. sapiens	SCARNA12	small Cajal body-specific RNA 12	GO:0006396 RNA processing;GO:0016070 RNA metabolic process;GO:0010467 gene expression							0.0	0.0	0.0	0.0	0.0	0.0	0.0	0.0	0.0	0.0	0.0	0.0	0.0	0.0	0.0	0.0	0.0	0.0	0.0	0.0
HIST1H1B	3009	gene_synonym	H. sapiens	3009	H. sapiens	H1-5	H1.5 linker histone, cluster member	GO:0071169 establishment of protein localization to chromatin;GO:0051574 positive regulation of histone H3-K9 methylation;GO:0070199 establishment of protein localization to chromosome		Predicted intracellular proteins	Nucleoplasm (Supported)				1.0	0.0	0.0	0.0	1.0	0.0	0.0	0.0	0.0	0.0	0.0	0.0	0.0	0.0	0.0	0.0	0.0	0.0	0.0	1.0
HIST1H2AM	8336	gene_synonym	H. sapiens	8336	H. sapiens	H2AC17	H2A clustered histone 17	GO:0008150 biological_process		Predicted intracellular proteins	Nucleoplasm (Approved)				1.0	1.0	0.0	0.0	0.0	0.0	0.0	0.0	0.0	0.0	0.0	0.0	0.0	0.0	0.0	0.0	0.0	0.0	0.0	0.0
GCAT	23464	symbol	H. sapiens	23464	H. sapiens	GCAT	glycine C-acetyltransferase	GO:0019518 L-threonine catabolic process to glycine;GO:0006567 threonine catabolic process;GO:0006566 threonine metabolic process		Enzymes; Predicted intracellular proteins; ENZYME proteins:Transferases	Nucleoplasm (Supported); Additional: Mitochondria;Nuclear speckles	Pyridoxal phosphate; Glycine			0.0	0.0	0.0	0.0	0.0	0.0	0.0	1.0	0.0	0.0	0.0	0.0	0.0	0.0	0.0	0.0	0.0	0.0	0.0	0.0
EIF6	3692	symbol	H. sapiens	3692	H. sapiens	EIF6	eukaryotic translation initiation factor 6	GO:1902626 assembly of large subunit precursor of preribosome;GO:0042256 mature ribosome assembly;GO:0000054 ribosomal subunit export from nucleus		Predicted intracellular proteins	Nucleoplasm (Supported)	Copper			1.0	0.0	0.0	0.0	0.0	0.0	0.0	1.0	0.0	0.0	0.0	0.0	0.0	0.0	0.0	0.0	0.0	0.0	0.0	0.0
SNORA54	677833	symbol	H. sapiens	677833	H. sapiens	SNORA54	small nucleolar RNA, H/ACA box 54	GO:0006396 RNA processing;GO:0016070 RNA metabolic process;GO:0010467 gene expression							0.0	0.0	0.0	0.0	0.0	0.0	0.0	0.0	0.0	0.0	0.0	0.0	0.0	0.0	0.0	0.0	0.0	0.0	0.0	0.0
HIST1H2AK	8330	gene_synonym	H. sapiens	8330	H. sapiens	H2AC15	H2A clustered histone 15	GO:0008150 biological_process		Predicted intracellular proteins	Nucleoplasm (Approved)				1.0	1.0	0.0	0.0	0.0	0.0	0.0	0.0	0.0	0.0	0.0	0.0	0.0	0.0	0.0	0.0	0.0	0.0	0.0	0.0
HIST1H2BG	3017	gene_synonym	H. sapiens	3017	H. sapiens	H2BC5	H2B clustered histone 5	GO:0006334 nucleosome assembly;GO:0031497 chromatin assembly;GO:0034728 nucleosome organization		Predicted intracellular proteins	Nucleoplasm (Approved); Additional: Cytosol				1.0	1.0	0.0	1.0	0.0	0.0	0.0	0.0	0.0	0.0	0.0	0.0	0.0	0.0	0.0	0.0	0.0	0.0	0.0	0.0
HIST1H3B	8358	gene_synonym	H. sapiens	8358	H. sapiens	H3C2	H3 clustered histone 2	GO:0006335 DNA replication-dependent chromatin assembly;GO:0034723 DNA replication-dependent chromatin organization;GO:0032200 telomere organization		Predicted intracellular proteins; Cancer-related genes; Disease related genes					1.0	0.0	1.0	0.0	0.0	0.0	0.0	0.0	0.0	0.0	0.0	0.0	0.0	0.0	0.0	0.0	0.0	0.0	0.0	0.0
HIST1H3C	8352	gene_synonym	H. sapiens	8352	H. sapiens	H3C3	H3 clustered histone 3	GO:0006335 DNA replication-dependent chromatin assembly;GO:0034723 DNA replication-dependent chromatin organization;GO:0032200 telomere organization		Predicted intracellular proteins; Disease related genes					1.0	0.0	1.0	0.0	0.0	0.0	0.0	0.0	0.0	0.0	0.0	0.0	0.0	0.0	0.0	0.0	0.0	0.0	0.0	0.0
HIST1H2AG	8969	gene_synonym	H. sapiens	8969	H. sapiens	H2AC11	H2A clustered histone 11	GO:0008150 biological_process		Predicted intracellular proteins	Nucleoplasm (Approved)				1.0	1.0	0.0	0.0	0.0	0.0	0.0	0.0	0.0	0.0	0.0	0.0	0.0	0.0	0.0	0.0	0.0	0.0	0.0	0.0
HIST1H1E	3008	gene_synonym	H. sapiens	3008	H. sapiens	H1-4	H1.4 linker histone, cluster member	GO:0098532 histone H3-K27 trimethylation;GO:0070734 histone H3-K27 methylation;GO:0016584 nucleosome positioning		Predicted intracellular proteins; Disease related genes	Nuclear speckles (Supported)	Copper	(M32)PID HDAC CLASSIII PATHWAY		1.0	0.0	0.0	1.0	1.0	0.0	0.0	0.0	0.0	0.0	0.0	0.0	0.0	0.0	0.0	0.0	0.0	0.0	0.0	0.0
ANKRD30BL	554226	symbol	H. sapiens	554226	H. sapiens	ANKRD30BL	ankyrin repeat domain 30B like			Predicted intracellular proteins					0.0	0.0	0.0	0.0	0.0	0.0	0.0	0.0	0.0	0.0	0.0	0.0	0.0	0.0	0.0	0.0	0.0	0.0	0.0	0.0
HIST1H3D	8351	gene_synonym	H. sapiens	8351	H. sapiens	H3C4	H3 clustered histone 4	GO:0006335 DNA replication-dependent chromatin assembly;GO:0034723 DNA replication-dependent chromatin organization;GO:0032200 telomere organization		Predicted intracellular proteins; Disease related genes					1.0	0.0	1.0	1.0	0.0	0.0	0.0	0.0	0.0	0.0	0.0	0.0	0.0	0.0	0.0	0.0	0.0	0.0	0.0	0.0
HIST1H3G	8355	gene_synonym	H. sapiens	8355	H. sapiens	H3C8	H3 clustered histone 8	GO:0006335 DNA replication-dependent chromatin assembly;GO:0034723 DNA replication-dependent chromatin organization;GO:0032200 telomere organization		Predicted intracellular proteins; Disease related genes					1.0	0.0	1.0	0.0	0.0	0.0	0.0	0.0	0.0	0.0	0.0	0.0	0.0	0.0	0.0	0.0	0.0	0.0	0.0	0.0
SNORA52	619565	symbol	H. sapiens	619565	H. sapiens	SNORA52	small nucleolar RNA, H/ACA box 52	GO:0006396 RNA processing;GO:0016070 RNA metabolic process;GO:0010467 gene expression							0.0	0.0	0.0	0.0	0.0	0.0	0.0	0.0	0.0	0.0	0.0	0.0	0.0	0.0	0.0	0.0	0.0	0.0	0.0	0.0
SUSD5	26032	symbol	H. sapiens	26032	H. sapiens	SUSD5	sushi domain containing 5	GO:0007219 Notch signaling pathway;GO:0007155 cell adhesion;GO:0022610 biological adhesion		Predicted intracellular proteins	Golgi apparatus;Vesicles (Uncertain)				0.0	0.0	0.0	0.0	0.0	0.0	0.0	0.0	0.0	0.0	0.0	0.0	0.0	0.0	0.0	0.0	0.0	0.0	0.0	0.0
GGT5	2687	symbol	H. sapiens	2687	H. sapiens	GGT5	gamma-glutamyltransferase 5	GO:1901748 leukotriene D4 metabolic process;GO:1901750 leukotriene D4 biosynthetic process;GO:0006751 glutathione catabolic process		Enzymes; ENZYME proteins:Hydrolases; Predicted intracellular proteins; ENZYME proteins:Transferases	Nucleoli fibrillar center (Approved)				0.0	0.0	0.0	0.0	0.0	0.0	0.0	1.0	0.0	0.0	0.0	0.0	0.0	0.0	0.0	0.0	0.0	0.0	0.0	0.0
HIST1H4E	8367	gene_synonym	H. sapiens	8367	H. sapiens	H4C5	H4 clustered histone 5	GO:0045653 negative regulation of megakaryocyte differentiation;GO:0006335 DNA replication-dependent chromatin assembly;GO:0034723 DNA replication-dependent chromatin organization		Predicted intracellular proteins; Disease related genes					1.0	0.0	0.0	0.0	0.0	0.0	0.0	0.0	0.0	0.0	0.0	0.0	0.0	0.0	0.0	0.0	0.0	0.0	0.0	0.0
ZBTB46	140685	symbol	H. sapiens	140685	H. sapiens	ZBTB46	zinc finger and BTB domain containing 46	GO:2001200 positive regulation of dendritic cell differentiation;GO:2001199 negative regulation of dendritic cell differentiation;GO:0045650 negative regulation of macrophage differentiation		Predicted intracellular proteins; Transcription factors:Zinc-coordinating DNA-binding domains	Nucleoplasm (Approved)				1.0	0.0	0.0	0.0	0.0	0.0	0.0	0.0	0.0	0.0	0.0	0.0	0.0	0.0	0.0	0.0	0.0	0.0	0.0	0.0
GPR183	1880	symbol	H. sapiens	1880	H. sapiens	GPR183	G protein-coupled receptor 183	GO:0036145 dendritic cell homeostasis;GO:2000458 regulation of astrocyte chemotaxis;GO:0061470 T follicular helper cell differentiation		G-protein coupled receptors:GPCRs excl olfactory receptors				(M5890)HALLMARK TNFA SIGNALING VIA NFKB; (M5932)HALLMARK INFLAMMATORY RESPONSE	0.0	0.0	0.0	0.0	0.0	0.0	1.0	0.0	0.0	0.0	0.0	0.0	0.0	0.0	1.0	0.0	0.0	0.0	0.0	0.0
HIST1H2AI	8329	gene_synonym	H. sapiens	8329	H. sapiens	H2AC13	H2A clustered histone 13	GO:0008150 biological_process		Predicted intracellular proteins	Nucleoplasm (Approved)				1.0	1.0	0.0	0.0	0.0	0.0	0.0	0.0	0.0	0.0	0.0	0.0	0.0	0.0	0.0	0.0	0.0	0.0	0.0	0.0
HIST1H4C	8364	gene_synonym	H. sapiens	8364	H. sapiens	H4C3	H4 clustered histone 3	GO:0045653 negative regulation of megakaryocyte differentiation;GO:0006335 DNA replication-dependent chromatin assembly;GO:0034723 DNA replication-dependent chromatin organization		Predicted intracellular proteins; Disease related genes				(M5945)HALLMARK HEME METABOLISM	1.0	0.0	0.0	0.0	0.0	0.0	0.0	0.0	0.0	0.0	0.0	0.0	0.0	0.0	0.0	0.0	0.0	0.0	0.0	0.0
SCARNA2	677766	symbol	H. sapiens	677766	H. sapiens	SCARNA2	small Cajal body-specific RNA 2	GO:0006396 RNA processing;GO:0016070 RNA metabolic process;GO:0010467 gene expression							0.0	0.0	0.0	0.0	0.0	0.0	0.0	0.0	0.0	0.0	0.0	0.0	0.0	0.0	0.0	0.0	0.0	0.0	0.0	0.0
HIST1H2AC	8334	gene_synonym	H. sapiens	8334	H. sapiens	H2AC6	H2A clustered histone 6	GO:0008285 negative regulation of cell population proliferation;GO:0042127 regulation of cell population proliferation;GO:0048523 negative regulation of cellular process		Predicted intracellular proteins; Cancer-related genes:Candidate cancer biomarkers	Nucleoplasm (Approved)				1.0	1.0	0.0	0.0	0.0	0.0	0.0	0.0	0.0	0.0	0.0	0.0	0.0	0.0	0.0	0.0	0.0	0.0	0.0	0.0
FAM46B	115572	gene_synonym	H. sapiens	115572	H. sapiens	TENT5B	terminal nucleotidyltransferase 5B	GO:0048255 mRNA stabilization;GO:0043489 RNA stabilization;GO:1902373 negative regulation of mRNA catabolic process		Predicted intracellular proteins					0.0	0.0	0.0	0.0	0.0	0.0	0.0	0.0	0.0	0.0	0.0	0.0	0.0	0.0	0.0	0.0	0.0	0.0	0.0	0.0
HIST1H2BD	3017	gene_synonym	H. sapiens	3017	H. sapiens	H2BC5	H2B clustered histone 5	GO:0006334 nucleosome assembly;GO:0031497 chromatin assembly;GO:0034728 nucleosome organization		Predicted intracellular proteins	Nucleoplasm (Approved); Additional: Cytosol				1.0	1.0	0.0	1.0	0.0	0.0	0.0	0.0	0.0	0.0	0.0	0.0	0.0	0.0	0.0	0.0	0.0	0.0	0.0	0.0
HIST2H2AC	8338	gene_synonym	H. sapiens	8338	H. sapiens	H2AC20	H2A clustered histone 20	GO:0008150 biological_process		Predicted intracellular proteins	Nucleoplasm (Approved)				1.0	1.0	0.0	0.0	0.0	0.0	0.0	0.0	0.0	0.0	0.0	0.0	0.0	0.0	0.0	0.0	0.0	0.0	0.0	0.0
ZFHX3	463	symbol	H. sapiens	463	H. sapiens	ZFHX3	zinc finger homeobox 3	GO:1904059 regulation of locomotor rhythm;GO:0050795 regulation of behavior;GO:0032922 circadian regulation of gene expression		Transcription factors:Helix-turn-helix domains; Predicted intracellular proteins; Cancer-related genes:Mutational cancer driver genes; Cancer-related genes:Mutated cancer genes	Nucleoplasm (Supported)		(M195)PID CMYB PATHWAY		0.0	0.0	0.0	0.0	0.0	0.0	0.0	0.0	0.0	0.0	0.0	0.0	0.0	0.0	0.0	0.0	0.0	0.0	0.0	0.0
SNORD10	652966	symbol	H. sapiens	652966	H. sapiens	SNORD10	small nucleolar RNA, C/D box 10	GO:0006396 RNA processing;GO:0016070 RNA metabolic process;GO:0010467 gene expression							0.0	0.0	0.0	0.0	0.0	0.0	0.0	0.0	0.0	0.0	0.0	0.0	0.0	0.0	0.0	0.0	0.0	0.0	0.0	0.0
F2RL2	2151	symbol	H. sapiens	2151	H. sapiens	F2RL2	coagulation factor II thrombin receptor like 2	GO:0070493 thrombin-activated receptor signaling pathway;GO:0051482 positive regulation of cytosolic calcium ion concentration involved in phospholipase C-activating G protein-coupled signaling pathway;GO:0035025 positive regulation of Rho protein signal transduction		G-protein coupled receptors:GPCRs excl olfactory receptors			(M138)PID THROMBIN PAR4 PATHWAY; (M193)PID NEPHRIN NEPH1 PATHWAY; (M238)PID THROMBIN PAR1 PATHWAY	(M5946)HALLMARK COAGULATION; (M5947)HALLMARK IL2 STAT5 SIGNALING	0.0	0.0	1.0	0.0	0.0	0.0	0.0	0.0	0.0	0.0	0.0	0.0	0.0	1.0	1.0	0.0	0.0	0.0	0.0	0.0
HIST1H1D	3007	gene_synonym	H. sapiens	3007	H. sapiens	H1-3	H1.3 linker histone, cluster member	GO:0098532 histone H3-K27 trimethylation;GO:0070734 histone H3-K27 methylation;GO:0016584 nucleosome positioning		Predicted intracellular proteins					1.0	0.0	0.0	0.0	1.0	0.0	0.0	1.0	0.0	0.0	0.0	0.0	0.0	0.0	0.0	0.0	0.0	0.0	0.0	0.0
HIST1H4D	8360	gene_synonym	H. sapiens	8360	H. sapiens	H4C4	H4 clustered histone 4	GO:0045653 negative regulation of megakaryocyte differentiation;GO:0006335 DNA replication-dependent chromatin assembly;GO:0034723 DNA replication-dependent chromatin organization		Predicted intracellular proteins; Disease related genes					1.0	0.0	0.0	0.0	0.0	0.0	0.0	0.0	0.0	0.0	0.0	0.0	0.0	0.0	0.0	0.0	0.0	0.0	0.0	0.0
SNORA70	26778	symbol	H. sapiens	26778	H. sapiens	SNORA70	small nucleolar RNA, H/ACA box 70	GO:0006396 RNA processing;GO:0016070 RNA metabolic process;GO:0010467 gene expression							0.0	0.0	0.0	0.0	0.0	0.0	0.0	0.0	0.0	0.0	0.0	0.0	0.0	0.0	0.0	0.0	0.0	0.0	0.0	0.0
HIST1H3J	8356	gene_synonym	H. sapiens	8356	H. sapiens	H3C12	H3 clustered histone 12	GO:0006335 DNA replication-dependent chromatin assembly;GO:0034723 DNA replication-dependent chromatin organization;GO:0032200 telomere organization		Predicted intracellular proteins; Disease related genes					1.0	0.0	1.0	0.0	0.0	0.0	0.0	0.0	0.0	0.0	0.0	0.0	0.0	0.0	0.0	0.0	0.0	0.0	0.0	0.0
ALX4	60529	symbol	H. sapiens	60529	H. sapiens	ALX4	ALX homeobox 4	GO:0035116 embryonic hindlimb morphogenesis;GO:0035115 embryonic forelimb morphogenesis;GO:0035137 hindlimb morphogenesis		Transcription factors:Helix-turn-helix domains; Human disease related genes:Congenital malformations:Congenital malformations of the musculoskeletal system; Human disease related genes:Congenital malformations:Other congenital malformations; Disease related genes; Predicted intracellular proteins	Nucleoplasm (Supported)				0.0	0.0	0.0	0.0	0.0	0.0	0.0	0.0	0.0	0.0	0.0	0.0	0.0	0.0	0.0	0.0	0.0	0.0	0.0	0.0
HIST1H2BL	8340	gene_synonym	H. sapiens	8340	H. sapiens	H2BC13	H2B clustered histone 13	GO:0006334 nucleosome assembly;GO:0031497 chromatin assembly;GO:0034728 nucleosome organization		Predicted intracellular proteins	Nucleoplasm (Approved); Additional: Cytosol				1.0	1.0	0.0	1.0	0.0	0.0	0.0	0.0	0.0	0.0	0.0	0.0	0.0	0.0	0.0	0.0	0.0	0.0	0.0	0.0
RABEPK	10244	symbol	H. sapiens	10244	H. sapiens	RABEPK	Rab9 effector protein with kelch motifs	GO:0006904 vesicle docking involved in exocytosis;GO:0048278 vesicle docking;GO:0140029 exocytic process		Predicted intracellular proteins	Plasma membrane (Uncertain)			(M5928)HALLMARK MYC TARGETS V2	0.0	0.0	0.0	0.0	0.0	0.0	0.0	0.0	0.0	0.0	0.0	0.0	0.0	0.0	0.0	0.0	0.0	0.0	0.0	0.0
KCNK3	3777	symbol	H. sapiens	3777	H. sapiens	KCNK3	potassium two pore domain channel subfamily K member 3	GO:0051481 negative regulation of cytosolic calcium ion concentration;GO:0030322 stabilization of membrane potential;GO:0071294 cellular response to zinc ion		FDA approved drug targets:Small molecule drugs; Voltage-gated ion channels:Two-P Potassium Channels; Disease related genes; Transporters:Transporter channels and pores; Human disease related genes:Cardiovascular diseases:Hypertensive diseases		Doxapram; Halothane			0.0	0.0	0.0	0.0	0.0	0.0	0.0	0.0	0.0	0.0	0.0	0.0	0.0	0.0	0.0	0.0	0.0	0.0	0.0	0.0
SNORD97	692223	symbol	H. sapiens	692223	H. sapiens	SNORD97	small nucleolar RNA, C/D box 97	GO:0006396 RNA processing;GO:0016070 RNA metabolic process;GO:0010467 gene expression							0.0	0.0	0.0	0.0	0.0	0.0	0.0	0.0	0.0	0.0	0.0	0.0	0.0	0.0	0.0	0.0	0.0	0.0	0.0	0.0
HIST1H1C	3006	gene_synonym	H. sapiens	3006	H. sapiens	H1-2	H1.2 linker histone, cluster member	GO:0098532 histone H3-K27 trimethylation;GO:0070734 histone H3-K27 methylation;GO:0016584 nucleosome positioning		Predicted intracellular proteins	Nucleoli rim;Nucleoplasm (Supported)			(M5939)HALLMARK P53 PATHWAY	1.0	0.0	0.0	0.0	1.0	0.0	0.0	0.0	0.0	0.0	0.0	0.0	0.0	0.0	0.0	0.0	0.0	0.0	0.0	0.0
SNORA24	677809	symbol	H. sapiens	677809	H. sapiens	SNORA24	small nucleolar RNA, H/ACA box 24	GO:0006396 RNA processing;GO:0016070 RNA metabolic process;GO:0010467 gene expression							0.0	0.0	0.0	0.0	0.0	0.0	0.0	0.0	0.0	0.0	0.0	0.0	0.0	0.0	0.0	0.0	0.0	0.0	0.0	0.0
LIF	3976	symbol	H. sapiens	3976	H. sapiens	LIF	LIF interleukin 6 family cytokine	GO:1901676 positive regulation of histone H3-K27 acetylation;GO:1901674 regulation of histone H3-K27 acetylation;GO:0072108 positive regulation of mesenchymal to epithelial transition involved in metanephros morphogenesis		Predicted secreted proteins; Predicted intracellular proteins; Cancer-related genes:Candidate cancer biomarkers	Cytosol (Supported)		(M65)PID FRA PATHWAY; (M145)PID P53 DOWNSTREAM PATHWAY; (M5883)NABA SECRETED FACTORS	(M5947)HALLMARK IL2 STAT5 SIGNALING; (M5890)HALLMARK TNFA SIGNALING VIA NFKB; (M5932)HALLMARK INFLAMMATORY RESPONSE	1.0	0.0	1.0	0.0	0.0	0.0	1.0	0.0	1.0	0.0	0.0	0.0	0.0	0.0	0.0	1.0	1.0	1.0	0.0	0.0
HIST1H2AH	85235	gene_synonym	H. sapiens	85235	H. sapiens	H2AC12	H2A clustered histone 12	GO:0008150 biological_process		Predicted intracellular proteins	Nucleoplasm (Approved)				1.0	1.0	0.0	0.0	0.0	0.0	0.0	0.0	0.0	0.0	0.0	0.0	0.0	0.0	0.0	0.0	0.0	0.0	0.0	0.0
XKR6	286046	symbol	H. sapiens	286046	H. sapiens	XKR6	XK related 6	GO:0070782 phosphatidylserine exposure on apoptotic cell surface;GO:0043652 engulfment of apoptotic cell;GO:0017121 plasma membrane phospholipid scrambling			Actin filaments (Approved)				0.0	0.0	0.0	0.0	0.0	0.0	0.0	0.0	0.0	0.0	0.0	0.0	0.0	0.0	0.0	0.0	0.0	0.0	0.0	0.0
HIST1H2BN	8341	gene_synonym	H. sapiens	8341	H. sapiens	H2BC15	H2B clustered histone 15	GO:0006334 nucleosome assembly;GO:0031497 chromatin assembly;GO:0034728 nucleosome organization		Predicted intracellular proteins	Nucleoplasm (Approved); Additional: Cytosol				1.0	1.0	0.0	1.0	0.0	0.0	0.0	0.0	0.0	0.0	0.0	0.0	0.0	0.0	0.0	0.0	0.0	0.0	0.0	0.0
HIST1H3F	8968	gene_synonym	H. sapiens	8968	H. sapiens	H3C7	H3 clustered histone 7	GO:0006335 DNA replication-dependent chromatin assembly;GO:0034723 DNA replication-dependent chromatin organization;GO:0032200 telomere organization		Predicted intracellular proteins; Disease related genes					1.0	0.0	1.0	0.0	0.0	0.0	0.0	0.0	0.0	0.0	0.0	0.0	0.0	0.0	0.0	0.0	0.0	0.0	0.0	0.0
ZNF460	10794	symbol	H. sapiens	10794	H. sapiens	ZNF460	zinc finger protein 460	GO:0006357 regulation of transcription by RNA polymerase II;GO:0006355 regulation of transcription, DNA-templated;GO:1903506 regulation of nucleic acid-templated transcription		Predicted intracellular proteins; Transcription factors:Zinc-coordinating DNA-binding domains	Nucleoplasm (Approved)				0.0	0.0	0.0	0.0	0.0	0.0	0.0	0.0	0.0	0.0	0.0	0.0	0.0	0.0	0.0	0.0	0.0	0.0	0.0	0.0
HIST1H2AL	8332	gene_synonym	H. sapiens	8332	H. sapiens	H2AC16	H2A clustered histone 16	GO:0008150 biological_process		Predicted intracellular proteins	Nucleoplasm (Approved)				1.0	1.0	0.0	0.0	0.0	0.0	0.0	0.0	0.0	0.0	0.0	0.0	0.0	0.0	0.0	0.0	0.0	0.0	0.0	0.0
HIST1H2BH	8345	gene_synonym	H. sapiens	8345	H. sapiens	H2BC9	H2B clustered histone 9	GO:0006334 nucleosome assembly;GO:0031497 chromatin assembly;GO:0034728 nucleosome organization		Predicted intracellular proteins	Nucleoplasm (Approved); Additional: Cytosol				1.0	1.0	0.0	1.0	0.0	0.0	0.0	0.0	0.0	0.0	0.0	0.0	0.0	0.0	0.0	0.0	0.0	0.0	0.0	0.0
IL11	3589	symbol	H. sapiens	3589	H. sapiens	IL11	interleukin 11	GO:0030219 megakaryocyte differentiation;GO:0046888 negative regulation of hormone secretion;GO:0045444 fat cell differentiation		Predicted secreted proteins; Predicted intracellular proteins; Cancer-related genes:Candidate cancer biomarkers			(M5883)NABA SECRETED FACTORS; (M5885)NABA MATRISOME ASSOCIATED; (M5889)NABA MATRISOME	(M5950)HALLMARK ALLOGRAFT REJECTION	0.0	0.0	1.0	0.0	0.0	0.0	0.0	0.0	0.0	0.0	0.0	0.0	0.0	0.0	1.0	1.0	0.0	0.0	0.0	0.0
FZD9	8326	symbol	H. sapiens	8326	H. sapiens	FZD9	frizzled class receptor 9	GO:1903910 negative regulation of receptor clustering;GO:1904394 negative regulation of skeletal muscle acetylcholine-gated channel clustering;GO:1990523 bone regeneration		G-protein coupled receptors:GPCRs excl olfactory receptors; Human disease related genes:Other congenital disorders:Chromosomal abnormalities; CD markers; G-protein coupled receptors:Family fz/smo receptors			(M77)PID WNT SIGNALING PATHWAY		0.0	0.0	0.0	0.0	0.0	1.0	0.0	0.0	1.0	1.0	0.0	1.0	0.0	0.0	1.0	0.0	0.0	0.0	0.0	0.0
COL4A1	1282	symbol	H. sapiens	1282	H. sapiens	COL4A1	collagen type IV alpha 1 chain	GO:0061304 retinal blood vessel morphogenesis;GO:0061299 retina vasculature morphogenesis in camera-type eye;GO:0038063 collagen-activated tyrosine kinase receptor signaling pathway		Human disease related genes:Cardiovascular diseases:Vascular diseases; Human disease related genes:Congenital malformations:Congenital malformations of the nervous system; Human disease related genes:Congenital malformations:Congenital malformations of the circulatory system; Predicted secreted proteins; Disease related genes; Predicted intracellular proteins			(M5887)NABA BASEMENT MEMBRANES; (M53)PID INTEGRIN3 PATHWAY; (M3005)NABA COLLAGENS	(M5905)HALLMARK ADIPOGENESIS; (M5930)HALLMARK EPITHELIAL MESENCHYMAL TRANSITION	0.0	0.0	0.0	0.0	0.0	1.0	0.0	1.0	1.0	0.0	0.0	0.0	1.0	0.0	0.0	0.0	0.0	1.0	0.0	0.0
KRT18	3875	symbol	H. sapiens	3875	H. sapiens	KRT18	keratin 18	GO:0043000 Golgi to plasma membrane CFTR protein transport;GO:0097284 hepatocyte apoptotic process;GO:0043001 Golgi to plasma membrane protein transport		Human disease related genes:Digestive system diseases:Liver diseases; Predicted intracellular proteins; Disease related genes; Cancer-related genes:Candidate cancer biomarkers	Cytosol (Supported)		(M220)PID CASPASE PATHWAY	(M5910)HALLMARK PROTEIN SECRETION; (M5902)HALLMARK APOPTOSIS; (M5906)HALLMARK ESTROGEN RESPONSE EARLY	0.0	0.0	0.0	0.0	0.0	0.0	0.0	0.0	0.0	0.0	0.0	0.0	0.0	0.0	0.0	0.0	0.0	0.0	0.0	0.0
RPS17	6218	symbol	H. sapiens	6218	H. sapiens	RPS17	ribosomal protein S17	GO:0006413 translational initiation;GO:0042274 ribosomal small subunit biogenesis;GO:0034101 erythrocyte homeostasis		Human disease related genes:Other congenital disorders:Ribosomopathies; Human disease related genes:Cardiovascular diseases:Hematologic diseases; Ribosomal proteins; Disease related genes; Predicted intracellular proteins	Cytosol;Endoplasmic reticulum (Approved); Additional: Nucleoli	Artenimol			1.0	0.0	0.0	0.0	0.0	0.0	0.0	1.0	0.0	0.0	0.0	0.0	0.0	0.0	0.0	0.0	0.0	0.0	0.0	0.0
RBMXL2	27288	symbol	H. sapiens	27288	H. sapiens	RBMXL2	RBMX like 2	GO:0000377 RNA splicing, via transesterification reactions with bulged adenosine as nucleophile;GO:0000398 mRNA splicing, via spliceosome;GO:0000375 RNA splicing, via transesterification reactions		Predicted intracellular proteins					0.0	0.0	0.0	0.0	0.0	0.0	0.0	0.0	0.0	0.0	0.0	0.0	0.0	0.0	0.0	0.0	0.0	0.0	0.0	0.0
LOC100507156	100507156	Gene_ID	H. sapiens	100507156	H. sapiens	LOC100507156	uncharacterized LOC100507156								0.0	0.0	0.0	0.0	0.0	0.0	0.0	0.0	0.0	0.0	0.0	0.0	0.0	0.0	0.0	0.0	0.0	0.0	0.0	0.0
HIST1H2BO	8348	gene_synonym	H. sapiens	8348	H. sapiens	H2BC17	H2B clustered histone 17	GO:0006334 nucleosome assembly;GO:0031497 chromatin assembly;GO:0034728 nucleosome organization		Predicted intracellular proteins	Nucleoplasm (Approved); Additional: Cytosol				1.0	1.0	0.0	1.0	0.0	0.0	0.0	0.0	0.0	0.0	0.0	0.0	0.0	0.0	0.0	0.0	0.0	0.0	0.0	0.0
SLC7A5P2	387254	symbol	H. sapiens	387254	H. sapiens	SLC7A5P2	solute carrier family 7 member 5 pseudogene 2	GO:1902475 L-alpha-amino acid transmembrane transport;GO:0015807 L-amino acid transport;GO:0003333 amino acid transmembrane transport							0.0	0.0	0.0	0.0	0.0	0.0	0.0	0.0	0.0	0.0	0.0	0.0	0.0	0.0	0.0	0.0	0.0	0.0	0.0	0.0
SYNE3	161176	symbol	H. sapiens	161176	H. sapiens	SYNE3	spectrin repeat containing nuclear envelope family member 3	GO:0007097 nuclear migration;GO:0051647 nucleus localization;GO:0008360 regulation of cell shape		Predicted intracellular proteins	Nuclear membrane (Supported)				0.0	0.0	0.0	0.0	0.0	0.0	0.0	0.0	0.0	0.0	0.0	0.0	0.0	0.0	0.0	0.0	0.0	0.0	0.0	0.0
SNORA67	26781	symbol	H. sapiens	26781	H. sapiens	SNORA67	small nucleolar RNA, H/ACA box 67	GO:0006396 RNA processing;GO:0016070 RNA metabolic process;GO:0010467 gene expression							0.0	0.0	0.0	0.0	0.0	0.0	0.0	0.0	0.0	0.0	0.0	0.0	0.0	0.0	0.0	0.0	0.0	0.0	0.0	0.0
NUTM2D	728130	symbol	H. sapiens	728130	H. sapiens	NUTM2D	NUT family member 2D			Predicted intracellular proteins; Cancer-related genes	Nuclear bodies (Approved)				0.0	0.0	0.0	0.0	0.0	0.0	0.0	0.0	0.0	0.0	0.0	0.0	0.0	0.0	0.0	0.0	0.0	0.0	0.0	0.0
RTL1	388015	symbol	H. sapiens	388015	H. sapiens	RTL1	retrotransposon Gag like 1				Cytosol (Approved)				0.0	0.0	0.0	0.0	0.0	0.0	0.0	0.0	0.0	0.0	0.0	0.0	0.0	0.0	0.0	0.0	0.0	0.0	0.0	0.0
DSCAM	1826	symbol	H. sapiens	1826	H. sapiens	DSCAM	DS cell adhesion molecule	GO:0060060 post-embryonic retina morphogenesis in camera-type eye;GO:0048842 positive regulation of axon extension involved in axon guidance;GO:0038007 netrin-activated signaling pathway			Golgi apparatus (Approved)		(M285)PID HNF3A PATHWAY; (M200)PID ERA GENOMIC PATHWAY		0.0	0.0	0.0	0.0	0.0	0.0	1.0	1.0	0.0	0.0	0.0	0.0	0.0	0.0	0.0	0.0	0.0	0.0	0.0	1.0
SCARNA10	692148	symbol	H. sapiens	692148	H. sapiens	SCARNA10	small Cajal body-specific RNA 10	GO:0006396 RNA processing;GO:0016070 RNA metabolic process;GO:0010467 gene expression							0.0	0.0	0.0	0.0	0.0	0.0	0.0	0.0	0.0	0.0	0.0	0.0	0.0	0.0	0.0	0.0	0.0	0.0	0.0	0.0
ELMSAN1	91748	gene_synonym	H. sapiens	91748	H. sapiens	MIDEAS	mitotic deacetylase associated SANT domain protein	GO:0016575 histone deacetylation;GO:0006476 protein deacetylation;GO:0035601 protein deacylation		Transcription factors:Helix-turn-helix domains; Predicted intracellular proteins	Nucleoplasm (Enhanced)				0.0	0.0	0.0	0.0	0.0	0.0	0.0	0.0	0.0	0.0	0.0	0.0	0.0	0.0	0.0	0.0	0.0	0.0	0.0	0.0
CENPV	201161	symbol	H. sapiens	201161	H. sapiens	CENPV	centromere protein V	GO:0031508 pericentric heterochromatin assembly;GO:0140462 pericentric heterochromatin organization;GO:0031048 heterochromatin assembly by small RNA		Predicted intracellular proteins	Nucleoplasm (Approved); Additional: Cytosol;Midbody				1.0	0.0	1.0	0.0	0.0	0.0	0.0	0.0	0.0	0.0	0.0	0.0	0.0	0.0	0.0	0.0	0.0	1.0	0.0	0.0
LIMD1	8994	symbol	H. sapiens	8994	H. sapiens	LIMD1	LIM domain containing 1	GO:0035331 negative regulation of hippo signaling;GO:0033962 P-body assembly;GO:0002076 osteoblast development		Predicted intracellular proteins	Focal adhesion sites;Nucleoplasm (Supported)				1.0	0.0	0.0	0.0	0.0	0.0	0.0	0.0	1.0	1.0	0.0	1.0	0.0	0.0	0.0	0.0	0.0	0.0	0.0	0.0
MRPS24	64951	symbol	H. sapiens	64951	H. sapiens	MRPS24	mitochondrial ribosomal protein S24	GO:0032543 mitochondrial translation;GO:0140053 mitochondrial gene expression;GO:0006412 translation		Ribosomal proteins; Predicted intracellular proteins					0.0	0.0	0.0	0.0	0.0	0.0	0.0	1.0	0.0	0.0	0.0	0.0	0.0	0.0	0.0	0.0	0.0	0.0	0.0	0.0
ADAMTS15	170689	symbol	H. sapiens	170689	H. sapiens	ADAMTS15	ADAM metallopeptidase with thrombospondin type 1 motif 15	GO:0007520 myoblast fusion;GO:0000768 syncytium formation by plasma membrane fusion;GO:0140253 cell-cell fusion		Predicted secreted proteins	Cytosol (Approved)		(M3468)NABA ECM REGULATORS; (M5885)NABA MATRISOME ASSOCIATED; (M5889)NABA MATRISOME		0.0	0.0	0.0	0.0	0.0	0.0	0.0	0.0	0.0	0.0	0.0	0.0	0.0	0.0	0.0	0.0	0.0	0.0	0.0	0.0
SUSD2	56241	symbol	H. sapiens	56241	H. sapiens	SUSD2	sushi domain containing 2	GO:0051782 negative regulation of cell division;GO:1902807 negative regulation of cell cycle G1/S phase transition;GO:0051302 regulation of cell division			Plasma membrane (Approved)				0.0	0.0	0.0	0.0	0.0	0.0	0.0	0.0	0.0	0.0	0.0	0.0	0.0	0.0	0.0	0.0	0.0	0.0	0.0	0.0
HIST1H4B	8366	gene_synonym	H. sapiens	8366	H. sapiens	H4C2	H4 clustered histone 2	GO:0045653 negative regulation of megakaryocyte differentiation;GO:0006335 DNA replication-dependent chromatin assembly;GO:0034723 DNA replication-dependent chromatin organization		Predicted intracellular proteins; Disease related genes					1.0	0.0	0.0	0.0	0.0	0.0	0.0	0.0	0.0	0.0	0.0	0.0	0.0	0.0	0.0	0.0	0.0	0.0	0.0	0.0
FZD2	2535	symbol	H. sapiens	2535	H. sapiens	FZD2	frizzled class receptor 2	GO:0003150 muscular septum morphogenesis;GO:0003149 membranous septum morphogenesis;GO:0060022 hard palate development		Cancer-related genes:Candidate cancer biomarkers; Human disease related genes:Congenital malformations:Congenital malformations of the musculoskeletal system; G-protein coupled receptors:Family fz/smo receptors; Disease related genes; G-protein coupled receptors:GPCRs excl olfactory receptors; Potential drug targets	Nuclear bodies;Nucleoplasm (Approved); Additional: Cell Junctions		(M77)PID WNT SIGNALING PATHWAY; (M23)PID WNT NONCANONICAL PATHWAY; (M5493)WNT SIGNALING	(M5942)HALLMARK UV RESPONSE DN	1.0	0.0	0.0	0.0	0.0	1.0	0.0	0.0	1.0	1.0	0.0	0.0	0.0	0.0	0.0	0.0	0.0	1.0	0.0	0.0
FOXE3	2301	symbol	H. sapiens	2301	H. sapiens	FOXE3	forkhead box E3	GO:0002930 trabecular meshwork development;GO:2001109 regulation of lens epithelial cell proliferation;GO:2001111 positive regulation of lens epithelial cell proliferation		Human disease related genes:Cardiovascular diseases:Vascular diseases; Human disease related genes:Congenital malformations:Congenital malformations of eye; Transcription factors:Helix-turn-helix domains; Human disease related genes:Nervous system diseases:Eye disease; Disease related genes; Predicted intracellular proteins					1.0	0.0	0.0	0.0	0.0	0.0	0.0	0.0	0.0	0.0	0.0	0.0	0.0	0.0	0.0	0.0	0.0	0.0	0.0	0.0
HIST1H3A	8350	gene_synonym	H. sapiens	8350	H. sapiens	H3C1	H3 clustered histone 1	GO:0006335 DNA replication-dependent chromatin assembly;GO:0034723 DNA replication-dependent chromatin organization;GO:0032200 telomere organization		Predicted intracellular proteins; Disease related genes					1.0	0.0	1.0	0.0	0.0	0.0	0.0	0.0	0.0	0.0	0.0	0.0	0.0	0.0	0.0	0.0	0.0	0.0	0.0	0.0
RASL10B	91608	symbol	H. sapiens	91608	H. sapiens	RASL10B	RAS like family 10 member B	GO:0003050 regulation of systemic arterial blood pressure by atrial natriuretic peptide;GO:0001990 regulation of systemic arterial blood pressure by hormone;GO:0003044 regulation of systemic arterial blood pressure mediated by a chemical signal		Enzymes; ENZYME proteins:Hydrolases; Predicted intracellular proteins	Vesicles (Approved)				0.0	0.0	0.0	0.0	0.0	0.0	0.0	0.0	0.0	0.0	0.0	0.0	0.0	0.0	0.0	0.0	0.0	0.0	0.0	0.0
JAG2	3714	symbol	H. sapiens	3714	H. sapiens	JAG2	jagged canonical Notch ligand 2	GO:1990134 epithelial cell apoptotic process involved in palatal shelf morphogenesis;GO:0009912 auditory receptor cell fate commitment;GO:0060120 inner ear receptor cell fate commitment			Vesicles (Supported); Additional: Cytosol		(M17)PID NOTCH PATHWAY; (M19)PID P73PATHWAY	(M5944)HALLMARK ANGIOGENESIS; (M5895)HALLMARK WNT BETA CATENIN SIGNALING; (M5939)HALLMARK P53 PATHWAY	1.0	0.0	0.0	0.0	0.0	1.0	0.0	0.0	0.0	0.0	0.0	0.0	0.0	0.0	1.0	0.0	1.0	0.0	0.0	0.0
HIST2H2BF	440689	gene_synonym	H. sapiens	440689	H. sapiens	H2BC18	H2B clustered histone 18	GO:0006334 nucleosome assembly;GO:0031497 chromatin assembly;GO:0034728 nucleosome organization		Predicted intracellular proteins	Nucleoplasm (Approved); Additional: Cytosol				1.0	1.0	0.0	0.0	0.0	0.0	0.0	0.0	0.0	0.0	0.0	0.0	0.0	0.0	0.0	0.0	0.0	0.0	0.0	0.0
LZTS1	11178	symbol	H. sapiens	11178	H. sapiens	LZTS1	leucine zipper tumor suppressor 1	GO:0016242 negative regulation of macroautophagy;GO:0048814 regulation of dendrite morphogenesis;GO:0010507 negative regulation of autophagy		Predicted intracellular proteins; Disease related genes	Plasma membrane (Approved); Additional: Nucleoli				0.0	0.0	0.0	0.0	0.0	0.0	0.0	0.0	0.0	0.0	0.0	0.0	0.0	0.0	0.0	0.0	0.0	0.0	0.0	0.0
TERC	7012	symbol	H. sapiens	7012	H. sapiens	TERC	telomerase RNA component	GO:2000773 negative regulation of cellular senescence;GO:0007004 telomere maintenance via telomerase;GO:0090344 negative regulation of cell aging							1.0	0.0	0.0	0.0	0.0	1.0	0.0	0.0	0.0	0.0	0.0	0.0	0.0	0.0	0.0	0.0	0.0	0.0	0.0	0.0
CELSR2	1952	symbol	H. sapiens	1952	H. sapiens	CELSR2	cadherin EGF LAG seven-pass G-type receptor 2	GO:0021999 neural plate anterior/posterior regionalization;GO:0033326 cerebrospinal fluid secretion;GO:0060897 neural plate regionalization		G-protein coupled receptors:GPCRs excl olfactory receptors; G-protein coupled receptors:Family 2 (B) receptors	Cytosol (Approved)			(M5906)HALLMARK ESTROGEN RESPONSE EARLY; (M5907)HALLMARK ESTROGEN RESPONSE LATE; (M5956)HALLMARK KRAS SIGNALING DN	0.0	0.0	0.0	0.0	0.0	0.0	1.0	0.0	0.0	1.0	0.0	0.0	0.0	0.0	0.0	0.0	0.0	0.0	0.0	0.0
HIST2H2BE	8349	gene_synonym	H. sapiens	8349	H. sapiens	H2BC21	H2B clustered histone 21	GO:0002227 innate immune response in mucosa;GO:0002385 mucosal immune response;GO:0002251 organ or tissue specific immune response		Predicted intracellular proteins	Nucleoplasm (Approved); Additional: Cytosol				1.0	1.0	0.0	0.0	0.0	0.0	0.0	0.0	0.0	0.0	0.0	0.0	0.0	0.0	0.0	0.0	0.0	0.0	0.0	0.0
HIST1H2BI	3017	gene_synonym	H. sapiens	3017	H. sapiens	H2BC5	H2B clustered histone 5	GO:0006334 nucleosome assembly;GO:0031497 chromatin assembly;GO:0034728 nucleosome organization		Predicted intracellular proteins	Nucleoplasm (Approved); Additional: Cytosol				1.0	1.0	0.0	1.0	0.0	0.0	0.0	0.0	0.0	0.0	0.0	0.0	0.0	0.0	0.0	0.0	0.0	0.0	0.0	0.0
SOCS3	9021	symbol	H. sapiens	9021	H. sapiens	SOCS3	suppressor of cytokine signaling 3	GO:0060670 branching involved in labyrinthine layer morphogenesis;GO:0060707 trophoblast giant cell differentiation;GO:0042532 negative regulation of tyrosine phosphorylation of STAT protein		Predicted intracellular proteins; Disease related genes	Cytosol (Approved); Additional: Plasma membrane		(M233)PID EPO PATHWAY; (M196)PID IL23 PATHWAY; (M183)PID IL6 7 PATHWAY	(M5897)HALLMARK IL6 JAK STAT3 SIGNALING; (M5890)HALLMARK TNFA SIGNALING VIA NFKB; (M5913)HALLMARK INTERFERON GAMMA RESPONSE	1.0	0.0	1.0	0.0	0.0	0.0	0.0	0.0	0.0	0.0	0.0	0.0	0.0	0.0	0.0	1.0	0.0	1.0	0.0	1.0
WLS	79971	symbol	H. sapiens	79971	H. sapiens	WLS	Wnt ligand secretion mediator	GO:0061355 Wnt protein secretion;GO:0061357 positive regulation of Wnt protein secretion;GO:0061356 regulation of Wnt protein secretion		Transporters:Accessory Factors Involved in Transport; Predicted intracellular proteins	Cytosol;Endoplasmic reticulum (Supported)			(M5947)HALLMARK IL2 STAT5 SIGNALING	1.0	0.0	0.0	0.0	0.0	0.0	0.0	0.0	0.0	1.0	0.0	0.0	0.0	0.0	0.0	0.0	0.0	0.0	0.0	0.0
HIST1H2BF	3017	gene_synonym	H. sapiens	3017	H. sapiens	H2BC5	H2B clustered histone 5	GO:0006334 nucleosome assembly;GO:0031497 chromatin assembly;GO:0034728 nucleosome organization		Predicted intracellular proteins	Nucleoplasm (Approved); Additional: Cytosol				1.0	1.0	0.0	1.0	0.0	0.0	0.0	0.0	0.0	0.0	0.0	0.0	0.0	0.0	0.0	0.0	0.0	0.0	0.0	0.0
TMEM2	23670	gene_synonym	H. sapiens	23670	H. sapiens	CEMIP2	cell migration inducing hyaluronidase 2	GO:0030214 hyaluronan catabolic process;GO:0030212 hyaluronan metabolic process;GO:0006027 glycosaminoglycan catabolic process		Enzymes; ENZYME proteins:Hydrolases; Predicted intracellular proteins	Plasma membrane (Supported); Additional: Cytosol;Vesicles				0.0	0.0	0.0	0.0	0.0	0.0	0.0	0.0	0.0	0.0	0.0	0.0	0.0	0.0	0.0	0.0	0.0	1.0	0.0	0.0
SLC25A29	123096	symbol	H. sapiens	123096	H. sapiens	SLC25A29	solute carrier family 25 member 29	GO:1990575 mitochondrial L-ornithine transmembrane transport;GO:0006844 acyl carnitine transport;GO:1903826 L-arginine transmembrane transport		Transporters:Electrochemical Potential-driven transporters; Predicted intracellular proteins		Levocarnitine			0.0	0.0	0.0	0.0	0.0	0.0	0.0	0.0	0.0	0.0	0.0	0.0	0.0	0.0	0.0	0.0	0.0	0.0	0.0	0.0
HCN2	610	symbol	H. sapiens	610	H. sapiens	HCN2	hyperpolarization activated cyclic nucleotide gated potassium and sodium channel 2	GO:0071321 cellular response to cGMP;GO:0070305 response to cGMP;GO:0086012 membrane depolarization during cardiac muscle cell action potential		Transporters:Transporter channels and pores; Voltage-gated ion channels:Cyclic Nucleotide-Regulated Channels		Cyclic GMP; Cyclic adenosine monophosphate; Ivabradine			0.0	0.0	0.0	0.0	0.0	0.0	0.0	0.0	0.0	0.0	0.0	0.0	0.0	0.0	0.0	0.0	0.0	0.0	0.0	0.0
KRT8	3856	symbol	H. sapiens	3856	H. sapiens	KRT8	keratin 8			Human disease related genes:Digestive system diseases:Liver diseases; Predicted intracellular proteins; Disease related genes; Cancer-related genes:Candidate cancer biomarkers	Intermediate filaments (Supported)	Tenecteplase; Lanoteplase; Copper	(M229)PID P38 ALPHA BETA DOWNSTREAM PATHWAY	(M5908)HALLMARK ANDROGEN RESPONSE; (M5906)HALLMARK ESTROGEN RESPONSE EARLY	0.0	0.0	0.0	0.0	0.0	0.0	0.0	0.0	0.0	0.0	0.0	0.0	0.0	0.0	0.0	0.0	0.0	0.0	0.0	0.0
PELI1	57162	symbol	H. sapiens	57162	H. sapiens	PELI1	pellino E3 ubiquitin protein ligase 1	GO:0008592 regulation of Toll signaling pathway;GO:0034141 positive regulation of toll-like receptor 3 signaling pathway;GO:0034139 regulation of toll-like receptor 3 signaling pathway		Enzymes; Predicted intracellular proteins; ENZYME proteins:Transferases	Intermediate filaments;Nucleoli;Nucleoplasm (Approved)			(M5913)HALLMARK INTERFERON GAMMA RESPONSE	0.0	0.0	1.0	0.0	1.0	0.0	0.0	0.0	0.0	0.0	0.0	0.0	0.0	0.0	0.0	0.0	0.0	0.0	0.0	0.0
POMK	84197	symbol	H. sapiens	84197	H. sapiens	POMK	protein O-mannose kinase	GO:0046835 carbohydrate phosphorylation;GO:0019233 sensory perception of pain;GO:0006493 protein O-linked glycosylation	Other	ENZYME proteins:Transferases; Disease related genes; Potential drug targets; Enzymes; Kinases; Predicted intracellular proteins; Human disease related genes:Congenital disorders of metabolism:Congenital disorders of glycan/glycoprotein metabolism					0.0	0.0	0.0	0.0	0.0	0.0	0.0	0.0	0.0	0.0	0.0	0.0	0.0	0.0	0.0	0.0	0.0	0.0	0.0	0.0
NEXN-AS1	374987	symbol	H. sapiens	374987	H. sapiens	NEXN-AS1	NEXN antisense RNA 1								0.0	0.0	0.0	0.0	0.0	0.0	0.0	0.0	0.0	0.0	0.0	0.0	0.0	0.0	0.0	0.0	0.0	0.0	0.0	0.0
BCAM	4059	symbol	H. sapiens	4059	H. sapiens	BCAM	basal cell adhesion molecule (Lutheran blood group)	GO:0007160 cell-matrix adhesion;GO:0031589 cell-substrate adhesion;GO:0007155 cell adhesion		Blood group antigen proteins; Predicted intracellular proteins; CD markers	Nucleoli fibrillar center (Approved)			(M5898)HALLMARK DNA REPAIR; (M5945)HALLMARK HEME METABOLISM	0.0	0.0	0.0	0.0	0.0	0.0	0.0	0.0	0.0	0.0	0.0	0.0	0.0	0.0	0.0	0.0	0.0	0.0	0.0	0.0
MIR663AHG	284801	symbol	H. sapiens	284801	H. sapiens	MIR663AHG	MIR663A host gene								0.0	0.0	0.0	0.0	0.0	0.0	0.0	0.0	0.0	0.0	0.0	0.0	0.0	0.0	0.0	0.0	0.0	0.0	0.0	0.0
SCARNA6	677772	symbol	H. sapiens	677772	H. sapiens	SCARNA6	small Cajal body-specific RNA 6	GO:0006396 RNA processing;GO:0016070 RNA metabolic process;GO:0010467 gene expression							0.0	0.0	0.0	0.0	0.0	0.0	0.0	0.0	0.0	0.0	0.0	0.0	0.0	0.0	0.0	0.0	0.0	0.0	0.0	0.0
COL4A2	1284	symbol	H. sapiens	1284	H. sapiens	COL4A2	collagen type IV alpha 2 chain	GO:0038063 collagen-activated tyrosine kinase receptor signaling pathway;GO:0038065 collagen-activated signaling pathway;GO:0035987 endodermal cell differentiation		Human disease related genes:Cardiovascular diseases:Vascular diseases; Human disease related genes:Congenital malformations:Congenital malformations of the nervous system; Cancer-related genes:Candidate cancer biomarkers; Predicted secreted proteins; Disease related genes; Predicted intracellular proteins	Vesicles (Supported)		(M5887)NABA BASEMENT MEMBRANES; (M3005)NABA COLLAGENS; (M5884)NABA CORE MATRISOME	(M5909)HALLMARK MYOGENESIS; (M5921)HALLMARK COMPLEMENT; (M5930)HALLMARK EPITHELIAL MESENCHYMAL TRANSITION	1.0	0.0	0.0	0.0	0.0	1.0	0.0	1.0	1.0	0.0	0.0	0.0	1.0	0.0	0.0	0.0	0.0	1.0	0.0	0.0
ADGRG2	10149	symbol	H. sapiens	10149	H. sapiens	ADGRG2	adhesion G protein-coupled receptor G2	GO:0007189 adenylate cyclase-activating G protein-coupled receptor signaling pathway;GO:0007188 adenylate cyclase-modulating G protein-coupled receptor signaling pathway;GO:0007283 spermatogenesis		Transporters; G-protein coupled receptors:Family 2 (B) receptors; Human disease related genes:Congenital malformations:Congenital malformations of genital organs; Disease related genes; Potential drug targets; G-protein coupled receptors:GPCRs excl olfactory receptors	Cytosol;Plasma membrane (Approved)				0.0	0.0	0.0	0.0	0.0	0.0	0.0	0.0	0.0	0.0	0.0	0.0	0.0	0.0	0.0	0.0	0.0	0.0	0.0	0.0
HIST1H2BE	3017	gene_synonym	H. sapiens	3017	H. sapiens	H2BC5	H2B clustered histone 5	GO:0006334 nucleosome assembly;GO:0031497 chromatin assembly;GO:0034728 nucleosome organization		Predicted intracellular proteins	Nucleoplasm (Approved); Additional: Cytosol				1.0	1.0	0.0	1.0	0.0	0.0	0.0	0.0	0.0	0.0	0.0	0.0	0.0	0.0	0.0	0.0	0.0	0.0	0.0	0.0
RNF152	220441	symbol	H. sapiens	220441	H. sapiens	RNF152	ring finger protein 152	GO:1904262 negative regulation of TORC1 signaling;GO:1903432 regulation of TORC1 signaling;GO:0070534 protein K63-linked ubiquitination		Enzymes; Predicted intracellular proteins; ENZYME proteins:Transferases					0.0	0.0	0.0	1.0	0.0	0.0	0.0	0.0	0.0	0.0	0.0	0.0	0.0	0.0	0.0	0.0	0.0	0.0	0.0	0.0
TMEM120B	144404	symbol	H. sapiens	144404	H. sapiens	TMEM120B	transmembrane protein 120B	GO:0051291 protein heterooligomerization;GO:0045444 fat cell differentiation;GO:0051259 protein complex oligomerization		Predicted intracellular proteins	Nucleoli fibrillar center (Approved); Additional: Cytosol				0.0	0.0	0.0	0.0	0.0	0.0	0.0	0.0	0.0	0.0	0.0	0.0	0.0	0.0	0.0	0.0	0.0	0.0	0.0	0.0
FAM60A	58516	gene_synonym	H. sapiens	58516	H. sapiens	SINHCAF	SIN3-HDAC complex associated factor	GO:0030336 negative regulation of cell migration;GO:2000146 negative regulation of cell motility;GO:0051271 negative regulation of cellular component movement		Predicted intracellular proteins	Nucleoplasm (Approved); Additional: Cytosol				1.0	0.0	0.0	0.0	0.0	0.0	0.0	0.0	0.0	0.0	0.0	0.0	0.0	0.0	0.0	0.0	0.0	0.0	0.0	0.0
CACNG8	59283	symbol	H. sapiens	59283	H. sapiens	CACNG8	calcium voltage-gated channel auxiliary subunit gamma 8	GO:0098943 neurotransmitter receptor transport, postsynaptic endosome to lysosome;GO:0098953 receptor diffusion trapping;GO:0098970 postsynaptic neurotransmitter receptor diffusion trapping		Transporters:Accessory Factors Involved in Transport; FDA approved drug targets:Small molecule drugs					0.0	0.0	0.0	0.0	0.0	0.0	0.0	0.0	0.0	0.0	0.0	0.0	0.0	0.0	0.0	1.0	0.0	0.0	1.0	0.0
HIST4H4	121504	gene_synonym	H. sapiens	121504	H. sapiens	H4-16	H4 histone 16	GO:0045653 negative regulation of megakaryocyte differentiation;GO:0006335 DNA replication-dependent chromatin assembly;GO:0034723 DNA replication-dependent chromatin organization		Predicted intracellular proteins; Disease related genes	Nucleoplasm (Supported)				1.0	0.0	0.0	0.0	0.0	0.0	0.0	0.0	0.0	0.0	0.0	0.0	0.0	0.0	0.0	0.0	0.0	0.0	0.0	0.0
COX20	116228	symbol	H. sapiens	116228	H. sapiens	COX20	cytochrome c oxidase assembly factor COX20	GO:0033617 mitochondrial cytochrome c oxidase assembly;GO:0008535 respiratory chain complex IV assembly;GO:0017004 cytochrome complex assembly		Disease related genes; Human disease related genes:Congenital disorders of metabolism:Mitochondrial diseases	Mitochondria (Enhanced)				1.0	0.0	0.0	0.0	0.0	0.0	0.0	0.0	0.0	0.0	0.0	0.0	0.0	0.0	0.0	0.0	0.0	0.0	0.0	0.0
ACTG2	72	symbol	H. sapiens	72	H. sapiens	ACTG2	actin gamma 2, smooth muscle	GO:0090131 mesenchyme migration;GO:0072132 mesenchyme morphogenesis;GO:0090130 tissue migration		Human disease related genes:Congenital malformations:Congenital malformations of the digestive system; Predicted intracellular proteins; Disease related genes			(M16801)SIG REGULATION OF THE ACTIN CYTOSKELETON BY RHO GTPASES	(M5915)HALLMARK APICAL JUNCTION	0.0	0.0	0.0	0.0	0.0	0.0	0.0	1.0	1.0	0.0	0.0	0.0	0.0	0.0	0.0	0.0	0.0	0.0	0.0	0.0
MOB4	25843	symbol	H. sapiens	25843	H. sapiens	MOB4	MOB family member 4, phocein			Predicted intracellular proteins					0.0	0.0	0.0	0.0	0.0	0.0	0.0	0.0	0.0	0.0	0.0	0.0	0.0	0.0	0.0	0.0	0.0	0.0	0.0	0.0
MT1E	4493	symbol	H. sapiens	4493	H. sapiens	MT1E	metallothionein 1E	GO:0010273 detoxification of copper ion;GO:1990169 stress response to copper ion;GO:0061687 detoxification of inorganic compound		Predicted intracellular proteins	Nucleoplasm (Approved)			(M5942)HALLMARK UV RESPONSE DN; (M5891)HALLMARK HYPOXIA	1.0	0.0	0.0	0.0	0.0	0.0	0.0	0.0	0.0	0.0	0.0	0.0	0.0	0.0	0.0	0.0	0.0	0.0	0.0	1.0
SNORD15B	114599	symbol	H. sapiens	114599	H. sapiens	SNORD15B	small nucleolar RNA, C/D box 15B	GO:0006396 RNA processing;GO:0016070 RNA metabolic process;GO:0010467 gene expression							0.0	0.0	0.0	0.0	0.0	0.0	0.0	0.0	0.0	0.0	0.0	0.0	0.0	0.0	0.0	0.0	0.0	0.0	0.0	0.0
SIK1	150094	symbol	H. sapiens	150094	H. sapiens	SIK1	salt inducible kinase 1	GO:0010868 negative regulation of triglyceride biosynthetic process;GO:0032792 negative regulation of CREB transcription factor activity;GO:2000210 positive regulation of anoikis	CAMK Ser/Thr protein kinase family	Human disease related genes:Nervous system diseases:Epilepsy; Kinases:CAMK Ser/Thr protein kinases; Disease related genes; Potential drug targets; Enzymes; Predicted intracellular proteins; ENZYME proteins:Transferases	Nucleoplasm (Approved); Additional: Vesicles	Dabrafenib; Fostamatinib	(M87)PID LKB1 PATHWAY	(M5890)HALLMARK TNFA SIGNALING VIA NFKB	0.0	0.0	0.0	0.0	0.0	0.0	0.0	0.0	0.0	0.0	0.0	0.0	0.0	0.0	0.0	0.0	0.0	0.0	1.0	0.0
ANK3	288	symbol	H. sapiens	288	H. sapiens	ANK3	ankyrin 3	GO:1900827 positive regulation of membrane depolarization during cardiac muscle cell action potential;GO:0072658 maintenance of protein location in membrane;GO:0072660 maintenance of protein location in plasma membrane		Predicted intracellular proteins; Human disease related genes:Other diseases:Mental and behavioural disorders; Cancer-related genes:Mutated cancer genes; Disease related genes	Plasma membrane (Supported)				0.0	0.0	0.0	0.0	0.0	0.0	1.0	1.0	0.0	0.0	0.0	0.0	0.0	0.0	0.0	0.0	0.0	0.0	1.0	0.0
SNORA23	677808	symbol	H. sapiens	677808	H. sapiens	SNORA23	small nucleolar RNA, H/ACA box 23	GO:0006396 RNA processing;GO:0016070 RNA metabolic process;GO:0010467 gene expression							0.0	0.0	0.0	0.0	0.0	0.0	0.0	0.0	0.0	0.0	0.0	0.0	0.0	0.0	0.0	0.0	0.0	0.0	0.0	0.0
FLRT1	23769	symbol	H. sapiens	23769	H. sapiens	FLRT1	fibronectin leucine rich transmembrane protein 1	GO:0008543 fibroblast growth factor receptor signaling pathway;GO:1990138 neuron projection extension;GO:0044344 cellular response to fibroblast growth factor stimulus							0.0	0.0	0.0	0.0	0.0	0.0	1.0	0.0	1.0	0.0	0.0	1.0	0.0	0.0	0.0	0.0	0.0	0.0	0.0	0.0
UBE2V1	7335	symbol	H. sapiens	7335	H. sapiens	UBE2V1	ubiquitin conjugating enzyme E2 V1	GO:1902523 positive regulation of protein K63-linked ubiquitination;GO:1900044 regulation of protein K63-linked ubiquitination;GO:1902916 positive regulation of protein polyubiquitination		Predicted intracellular proteins	Nucleoplasm (Enhanced)		(M110)PID IL1 PATHWAY		0.0	0.0	1.0	0.0	0.0	0.0	0.0	0.0	0.0	0.0	0.0	0.0	0.0	0.0	0.0	0.0	0.0	0.0	0.0	0.0
SNORA8	654320	symbol	H. sapiens	654320	H. sapiens	SNORA8	small nucleolar RNA, H/ACA box 8	GO:0006396 RNA processing;GO:0016070 RNA metabolic process;GO:0010467 gene expression							0.0	0.0	0.0	0.0	0.0	0.0	0.0	0.0	0.0	0.0	0.0	0.0	0.0	0.0	0.0	0.0	0.0	0.0	0.0	0.0
MAP3K5	4217	symbol	H. sapiens	4217	H. sapiens	MAP3K5	mitogen-activated protein kinase kinase kinase 5	GO:0072577 endothelial cell apoptotic process;GO:0038066 p38MAPK cascade;GO:0010663 positive regulation of striated muscle cell apoptotic process	STE Ser/Thr protein kinase family	Enzymes; Kinases:STE Ser/Thr protein kinases; Predicted intracellular proteins; ENZYME proteins:Transferases	Cytosol (Supported)		(M20)PID P38 MKK3 6PATHWAY; (M197)PID HIV NEF PATHWAY; (M249)PID PI3KCI AKT PATHWAY		1.0	0.0	0.0	0.0	0.0	0.0	0.0	0.0	1.0	0.0	0.0	0.0	0.0	1.0	0.0	1.0	0.0	0.0	0.0	0.0
PCDH10	57575	symbol	H. sapiens	57575	H. sapiens	PCDH10	protocadherin 10	GO:0007156 homophilic cell adhesion via plasma membrane adhesion molecules;GO:0098742 cell-cell adhesion via plasma-membrane adhesion molecules;GO:0098609 cell-cell adhesion			Golgi apparatus (Approved); Additional: Nucleoplasm;Vesicles				0.0	0.0	0.0	0.0	0.0	0.0	0.0	0.0	0.0	0.0	0.0	0.0	0.0	0.0	0.0	0.0	0.0	0.0	0.0	0.0
PDGFA	5154	symbol	H. sapiens	5154	H. sapiens	PDGFA	platelet derived growth factor subunit A	GO:0060683 regulation of branching involved in salivary gland morphogenesis by epithelial-mesenchymal signaling;GO:0010512 negative regulation of phosphatidylinositol biosynthetic process;GO:1990401 embryonic lung development		Candidate cardiovascular disease genes; Human disease related genes:Cancers:Cancers of eye, brain, and central nervous system; Cancer-related genes:Candidate cancer biomarkers; Predicted secreted proteins; Human disease related genes:Cancers:Cancers of the lung and pleura; RAS pathway related proteins; Predicted intracellular proteins	Golgi apparatus (Approved)		(M144)PID CERAMIDE PATHWAY; (M5883)NABA SECRETED FACTORS; (M5885)NABA MATRISOME ASSOCIATED	(M5944)HALLMARK ANGIOGENESIS; (M5939)HALLMARK P53 PATHWAY	0.0	0.0	1.0	0.0	0.0	1.0	1.0	0.0	1.0	0.0	1.0	0.0	1.0	1.0	1.0	1.0	1.0	1.0	0.0	0.0
FENDRR	400550	symbol	H. sapiens	400550	H. sapiens	FENDRR	FOXF1 adjacent non-coding developmental regulatory RNA								0.0	0.0	0.0	0.0	0.0	0.0	0.0	0.0	0.0	0.0	0.0	0.0	0.0	0.0	0.0	0.0	0.0	0.0	0.0	0.0
FLJ16779	100192386	symbol	H. sapiens	100192386	H. sapiens	FLJ16779	uncharacterized LOC100192386								0.0	0.0	0.0	0.0	0.0	0.0	0.0	0.0	0.0	0.0	0.0	0.0	0.0	0.0	0.0	0.0	0.0	0.0	0.0	0.0
BRSK1	84446	symbol	H. sapiens	84446	H. sapiens	BRSK1	BR serine/threonine kinase 1	GO:0090176 microtubule cytoskeleton organization involved in establishment of planar polarity;GO:2000807 regulation of synaptic vesicle clustering;GO:0001736 establishment of planar polarity	CAMK Ser/Thr protein kinase family	Enzymes; Kinases:CAMK Ser/Thr protein kinases; Predicted intracellular proteins; ENZYME proteins:Transferases	Nucleoplasm (Supported); Additional: Cell Junctions		(M87)PID LKB1 PATHWAY		0.0	0.0	0.0	0.0	0.0	0.0	1.0	0.0	0.0	0.0	0.0	0.0	0.0	0.0	0.0	0.0	0.0	0.0	0.0	0.0
ITGA10	8515	symbol	H. sapiens	8515	H. sapiens	ITGA10	integrin subunit alpha 10	GO:0033627 cell adhesion mediated by integrin;GO:0007229 integrin-mediated signaling pathway;GO:0007160 cell-matrix adhesion					(M47)PID INTEGRIN CS PATHWAY; (M67)PID ARF6 TRAFFICKING PATHWAY; (M18)PID INTEGRIN1 PATHWAY	(M5915)HALLMARK APICAL JUNCTION	0.0	0.0	1.0	0.0	0.0	1.0	0.0	1.0	1.0	0.0	0.0	0.0	1.0	0.0	0.0	0.0	0.0	0.0	0.0	0.0
EGLN2	112398	symbol	H. sapiens	112398	H. sapiens	EGLN2	egl-9 family hypoxia inducible factor 2	GO:0018401 peptidyl-proline hydroxylation to 4-hydroxy-L-proline;GO:0019511 peptidyl-proline hydroxylation;GO:0030520 intracellular estrogen receptor signaling pathway		Enzymes; Predicted intracellular proteins; ENZYME proteins:Oxidoreductases	Nucleoplasm (Supported)	Ascorbic acid; Roxadustat	(M180)PID HIF1A PATHWAY; (M44)PID HIF2PATHWAY; (M3468)NABA ECM REGULATORS	(M5938)HALLMARK REACTIVE OXYGEN SPECIES PATHWAY	1.0	0.0	0.0	0.0	0.0	1.0	0.0	0.0	0.0	0.0	0.0	0.0	0.0	0.0	0.0	0.0	0.0	0.0	0.0	1.0
WBP1	23559	symbol	H. sapiens	23559	H. sapiens	WBP1	WW domain binding protein 1	GO:0008150 biological_process			Cytosol (Approved)				0.0	0.0	0.0	0.0	0.0	0.0	0.0	0.0	0.0	0.0	0.0	0.0	0.0	0.0	0.0	0.0	0.0	0.0	0.0	0.0
LRRTM2	26045	symbol	H. sapiens	26045	H. sapiens	LRRTM2	leucine rich repeat transmembrane neuronal 2	GO:0099151 regulation of postsynaptic density assembly;GO:0099150 regulation of postsynaptic specialization assembly;GO:1904889 regulation of excitatory synapse assembly		Predicted intracellular proteins					0.0	0.0	0.0	0.0	0.0	0.0	1.0	0.0	0.0	0.0	0.0	0.0	0.0	0.0	0.0	0.0	0.0	0.0	0.0	0.0
SARDH	1757	symbol	H. sapiens	1757	H. sapiens	SARDH	sarcosine dehydrogenase	GO:1901053 sarcosine catabolic process;GO:1901052 sarcosine metabolic process;GO:0042219 cellular modified amino acid catabolic process		ENZYME proteins:Oxidoreductases; Disease related genes; Potential drug targets; Enzymes; Predicted intracellular proteins	Mitochondria (Approved)				0.0	0.0	0.0	0.0	0.0	0.0	0.0	1.0	0.0	0.0	0.0	0.0	0.0	0.0	0.0	0.0	0.0	0.0	0.0	0.0
PAM16	51025	symbol	H. sapiens	51025	H. sapiens	PAM16	presequence translocase associated motor 16	GO:0030150 protein import into mitochondrial matrix;GO:0032780 negative regulation of ATP-dependent activity;GO:0044743 protein transmembrane import into intracellular organelle		Human disease related genes:Congenital malformations:Congenital malformations of the musculoskeletal system; Predicted intracellular proteins; Disease related genes	Mitochondria;Nucleoplasm (Approved); Additional: Microtubules				0.0	0.0	0.0	0.0	0.0	0.0	0.0	0.0	0.0	0.0	0.0	1.0	0.0	0.0	0.0	0.0	0.0	0.0	0.0	0.0
PLAT	5327	symbol	H. sapiens	5327	H. sapiens	PLAT	plasminogen activator, tissue type	GO:0060279 positive regulation of ovulation;GO:0060278 regulation of ovulation;GO:0099183 trans-synaptic signaling by BDNF, modulating synaptic transmission		FDA approved drug targets:Small molecule drugs; Candidate cardiovascular disease genes; Cancer-related genes:Candidate cancer biomarkers; ENZYME proteins:Hydrolases; Predicted secreted proteins; FDA approved drug targets:Biotech drugs; Disease related genes; Enzymes; Peptidases:Serine-type peptidases	Actin filaments (Approved)	Aminocaproic acid; Iloprost; Human C1-esterase inhibitor; 5-(DIMETHYLAMINO)-2-NAPHTHALENESULFONIC ACID; Dexibuprofen; Conestat alfa	(M169)PID INTEGRIN2 PATHWAY; (M159)PID AMB2 NEUTROPHILS PATHWAY; (M3468)NABA ECM REGULATORS	(M5946)HALLMARK COAGULATION; (M5902)HALLMARK APOPTOSIS; (M5921)HALLMARK COMPLEMENT	0.0	0.0	1.0	0.0	0.0	0.0	0.0	0.0	1.0	0.0	0.0	0.0	1.0	1.0	1.0	0.0	0.0	0.0	0.0	0.0
SCARNA7	677767	symbol	H. sapiens	677767	H. sapiens	SCARNA7	small Cajal body-specific RNA 7	GO:0006396 RNA processing;GO:0016070 RNA metabolic process;GO:0010467 gene expression							0.0	0.0	0.0	0.0	0.0	0.0	0.0	0.0	0.0	0.0	0.0	0.0	0.0	0.0	0.0	0.0	0.0	0.0	0.0	0.0
SLC3A2	6520	symbol	H. sapiens	6520	H. sapiens	SLC3A2	solute carrier family 3 member 2	GO:0015823 phenylalanine transport;GO:1904273 L-alanine import across plasma membrane;GO:0098713 leucine import across plasma membrane		CD markers; Cancer-related genes:Candidate cancer biomarkers; Transporters:Accessory Factors Involved in Transport; Transporters:Electrochemical Potential-driven transporters; Predicted intracellular proteins	Nucleoplasm;Plasma membrane (Approved)		(M60)PID NFAT TFPATHWAY	(M5939)HALLMARK P53 PATHWAY	0.0	0.0	1.0	0.0	0.0	0.0	0.0	1.0	1.0	0.0	0.0	0.0	1.0	0.0	0.0	0.0	0.0	0.0	0.0	0.0
APBA2	321	symbol	H. sapiens	321	H. sapiens	APBA2	amyloid beta precursor protein binding family A member 2	GO:0007268 chemical synaptic transmission;GO:0098916 anterograde trans-synaptic signaling;GO:0099537 trans-synaptic signaling		Transporters:Accessory Factors Involved in Transport; Predicted intracellular proteins	Golgi apparatus (Enhanced)				0.0	0.0	0.0	0.0	0.0	0.0	0.0	0.0	0.0	0.0	0.0	0.0	0.0	0.0	0.0	0.0	0.0	0.0	0.0	0.0
SCARNA17	677769	symbol	H. sapiens	677769	H. sapiens	SCARNA17	small Cajal body-specific RNA 17	GO:0006396 RNA processing;GO:0016070 RNA metabolic process;GO:0010467 gene expression							0.0	0.0	0.0	0.0	0.0	0.0	0.0	0.0	0.0	0.0	0.0	0.0	0.0	0.0	0.0	0.0	0.0	0.0	0.0	0.0
MFHAS1	9258	symbol	H. sapiens	9258	H. sapiens	MFHAS1	multifunctional ROCO family signaling regulator 1	GO:0034137 positive regulation of toll-like receptor 2 signaling pathway;GO:0034136 negative regulation of toll-like receptor 2 signaling pathway;GO:0034135 regulation of toll-like receptor 2 signaling pathway		Predicted intracellular proteins; Disease related genes	Nucleoplasm (Approved); Additional: Cytosol			(M5945)HALLMARK HEME METABOLISM	0.0	0.0	0.0	0.0	0.0	0.0	0.0	0.0	0.0	0.0	0.0	0.0	0.0	0.0	1.0	0.0	0.0	0.0	0.0	0.0
NRXN3	9369	symbol	H. sapiens	9369	H. sapiens	NRXN3	neurexin 3	GO:0007158 neuron cell-cell adhesion;GO:0071625 vocalization behavior;GO:0035176 social behavior		Predicted intracellular proteins					0.0	0.0	0.0	0.0	0.0	0.0	1.0	0.0	0.0	0.0	0.0	0.0	0.0	0.0	0.0	0.0	0.0	0.0	0.0	0.0
HIST1H2AB	8335	gene_synonym	H. sapiens	8335	H. sapiens	H2AC4	H2A clustered histone 4	GO:0008285 negative regulation of cell population proliferation;GO:0042127 regulation of cell population proliferation;GO:0048523 negative regulation of cellular process		Predicted intracellular proteins	Nucleoplasm (Approved)				1.0	1.0	0.0	0.0	0.0	0.0	0.0	0.0	0.0	0.0	0.0	0.0	0.0	0.0	0.0	0.0	0.0	0.0	0.0	0.0
NBL1	4681	symbol	H. sapiens	4681	H. sapiens	NBL1	NBL1, DAN family BMP antagonist	GO:0038098 sequestering of BMP from receptor via BMP binding;GO:0035582 sequestering of BMP in extracellular matrix;GO:0048263 determination of dorsal identity		Predicted secreted proteins; Predicted intracellular proteins				(M5906)HALLMARK ESTROGEN RESPONSE EARLY; (M5907)HALLMARK ESTROGEN RESPONSE LATE	0.0	0.0	0.0	0.0	0.0	0.0	1.0	0.0	0.0	0.0	0.0	0.0	0.0	0.0	0.0	0.0	0.0	0.0	0.0	0.0
HES4	57801	symbol	H. sapiens	57801	H. sapiens	HES4	hes family bHLH transcription factor 4	GO:0009952 anterior/posterior pattern specification;GO:0003002 regionalization;GO:0007389 pattern specification process		Transcription factors:Basic domains; Predicted intracellular proteins	Nucleoplasm (Approved); Additional: Cytosol;Vesicles				0.0	0.0	0.0	0.0	0.0	1.0	0.0	0.0	0.0	0.0	0.0	0.0	0.0	0.0	0.0	0.0	0.0	0.0	0.0	0.0
TMEM101	84336	symbol	H. sapiens	84336	H. sapiens	TMEM101	transmembrane protein 101	GO:0043123 positive regulation of I-kappaB kinase/NF-kappaB signaling;GO:0043122 regulation of I-kappaB kinase/NF-kappaB signaling;GO:1902533 positive regulation of intracellular signal transduction		Transporters; Predicted intracellular proteins	Nucleoplasm;Plasma membrane (Approved)				0.0	0.0	0.0	0.0	0.0	0.0	0.0	0.0	0.0	0.0	0.0	0.0	0.0	0.0	0.0	0.0	0.0	0.0	0.0	0.0
B4GALNT4	338707	symbol	H. sapiens	338707	H. sapiens	B4GALNT4	beta-1,4-N-acetyl-galactosaminyltransferase 4			Enzymes; Predicted intracellular proteins; ENZYME proteins:Transferases	Cytosol;Nucleoplasm (Uncertain); Additional: Vesicles				0.0	0.0	0.0	0.0	0.0	0.0	0.0	0.0	0.0	0.0	0.0	0.0	0.0	0.0	0.0	0.0	0.0	0.0	0.0	0.0
DCC	1630	symbol	H. sapiens	1630	H. sapiens	DCC	DCC netrin 1 receptor	GO:0033563 dorsal/ventral axon guidance;GO:0021965 spinal cord ventral commissure morphogenesis;GO:2000171 negative regulation of dendrite development		Human disease related genes:Cancers:Cancers of the digestive system; Human disease related genes:Nervous system diseases:Other nervous and sensory system diseases; Cancer-related genes:Candidate cancer biomarkers; Disease related genes; Predicted intracellular proteins	Golgi apparatus (Approved)		(M108)PID NETRIN PATHWAY	(M5951)HALLMARK SPERMATOGENESIS; (M5956)HALLMARK KRAS SIGNALING DN	1.0	0.0	0.0	0.0	1.0	1.0	1.0	1.0	0.0	0.0	0.0	0.0	0.0	0.0	0.0	0.0	0.0	0.0	0.0	1.0
FOXE1	2304	symbol	H. sapiens	2304	H. sapiens	FOXE1	forkhead box E1	GO:0060465 pharynx development;GO:0060023 soft palate development;GO:0060022 hard palate development		Human disease related genes:Endocrine and metabolic diseases:Thyroid gland diseases; Transcription factors:Helix-turn-helix domains; Predicted intracellular proteins; Disease related genes					0.0	0.0	0.0	0.0	0.0	0.0	0.0	0.0	0.0	0.0	0.0	0.0	0.0	0.0	1.0	0.0	0.0	0.0	0.0	0.0
SNORA71A	26777	symbol	H. sapiens	26777	H. sapiens	SNORA71A	small nucleolar RNA, H/ACA box 71A	GO:0006396 RNA processing;GO:0016070 RNA metabolic process;GO:0010467 gene expression							0.0	0.0	0.0	0.0	0.0	0.0	0.0	0.0	0.0	0.0	0.0	0.0	0.0	0.0	0.0	0.0	0.0	0.0	0.0	0.0
CACNA1H	8912	symbol	H. sapiens	8912	H. sapiens	CACNA1H	calcium voltage-gated channel subunit alpha1 H	GO:0032342 aldosterone biosynthetic process;GO:0034651 cortisol biosynthetic process;GO:1902645 tertiary alcohol biosynthetic process		Voltage-gated ion channels:Voltage-Gated Calcium Channels; Human disease related genes:Nervous system diseases:Epilepsy; FDA approved drug targets:Small molecule drugs; Human disease related genes:Endocrine and metabolic diseases:Adrenal gland diseases; Disease related genes; Transporters:Transporter channels and pores	Nucleoplasm;Vesicles (Approved)	Isradipine; Cinnarizine; Verapamil; Zonisamide; Felodipine; Nitrendipine; Bepridil; Mibefradil; Flunarizine; Cannabidiol; Medical Cannabis; Nabiximols		(M5909)HALLMARK MYOGENESIS; (M5937)HALLMARK GLYCOLYSIS	0.0	0.0	0.0	0.0	0.0	0.0	0.0	1.0	0.0	0.0	0.0	0.0	1.0	0.0	0.0	1.0	0.0	0.0	1.0	0.0
AFAP1-AS1	84740	symbol	H. sapiens	84740	H. sapiens	AFAP1-AS1	AFAP1 antisense RNA 1								0.0	0.0	0.0	0.0	0.0	0.0	0.0	0.0	0.0	0.0	0.0	0.0	0.0	0.0	0.0	0.0	0.0	0.0	0.0	0.0
HIST3H2A	92815	gene_synonym	H. sapiens	92815	H. sapiens	H2AW	H2A.W histone	GO:0070914 UV-damage excision repair;GO:0006337 nucleosome disassembly;GO:0031498 chromatin disassembly		Predicted intracellular proteins	Nucleoplasm (Approved)			(M5939)HALLMARK P53 PATHWAY	1.0	1.0	0.0	0.0	0.0	0.0	0.0	0.0	0.0	0.0	0.0	0.0	0.0	0.0	0.0	0.0	0.0	0.0	0.0	0.0
MALAT1	378938	symbol	H. sapiens	378938	H. sapiens	MALAT1	metastasis associated lung adenocarcinoma transcript 1	GO:0110024 positive regulation of cardiac muscle myoblast proliferation;GO:0110022 regulation of cardiac muscle myoblast proliferation;GO:2000288 positive regulation of myoblast proliferation							0.0	0.0	0.0	0.0	0.0	0.0	0.0	0.0	0.0	0.0	0.0	0.0	0.0	0.0	0.0	0.0	0.0	0.0	0.0	0.0
FHOD1	29109	symbol	H. sapiens	29109	H. sapiens	FHOD1	formin homology 2 domain containing 1	GO:0051660 establishment of centrosome localization;GO:0051639 actin filament network formation;GO:0007097 nuclear migration		Predicted intracellular proteins	Cytosol (Supported)				0.0	0.0	0.0	0.0	0.0	0.0	0.0	0.0	0.0	0.0	0.0	0.0	0.0	0.0	0.0	0.0	0.0	0.0	0.0	0.0
RPL41	6171	symbol	H. sapiens	6171	H. sapiens	RPL41	ribosomal protein L41	GO:0002181 cytoplasmic translation;GO:0006412 translation;GO:0043043 peptide biosynthetic process		Ribosomal proteins; Predicted intracellular proteins	Endoplasmic reticulum (Supported)				1.0	0.0	0.0	0.0	0.0	0.0	0.0	1.0	0.0	0.0	0.0	0.0	0.0	0.0	0.0	0.0	0.0	0.0	0.0	0.0
RELN	5649	symbol	H. sapiens	5649	H. sapiens	RELN	reelin	GO:1902076 regulation of lateral motor column neuron migration;GO:1902078 positive regulation of lateral motor column neuron migration;GO:1905483 regulation of motor neuron migration		Predicted secreted proteins; Human disease related genes:Nervous system diseases:Epilepsy; Human disease related genes:Congenital malformations:Congenital malformations of the nervous system; Disease related genes	Golgi apparatus (Approved); Additional: Vesicles		(M69)PID REELIN PATHWAY; (M163)PID LIS1 PATHWAY; (M3008)NABA ECM GLYCOPROTEINS	(M5953)HALLMARK KRAS SIGNALING UP	0.0	0.0	0.0	0.0	0.0	1.0	1.0	1.0	1.0	0.0	0.0	0.0	1.0	1.0	0.0	1.0	0.0	0.0	1.0	0.0
COL25A1	84570	symbol	H. sapiens	84570	H. sapiens	COL25A1	collagen type XXV alpha 1 chain			Human disease related genes:Nervous system diseases:Eye disease; Predicted intracellular proteins; Disease related genes	Cytosol;Vesicles (Approved); Additional: Endoplasmic reticulum		(M3005)NABA COLLAGENS; (M5884)NABA CORE MATRISOME; (M5889)NABA MATRISOME		0.0	0.0	0.0	0.0	0.0	0.0	0.0	0.0	0.0	0.0	0.0	0.0	1.0	0.0	0.0	0.0	0.0	0.0	0.0	0.0
KCNN2	3781	symbol	H. sapiens	3781	H. sapiens	KCNN2	potassium calcium-activated channel subfamily N member 2	GO:0098914 membrane repolarization during atrial cardiac muscle cell action potential;GO:0099624 atrial cardiac muscle cell membrane repolarization;GO:0086014 atrial cardiac muscle cell action potential		Voltage-gated ion channels:Calcium-Activated Potassium Channels; FDA approved drug targets:Small molecule drugs; Transporters:Transporter channels and pores	Nucleoplasm;Plasma membrane (Uncertain)				0.0	0.0	0.0	0.0	0.0	0.0	0.0	0.0	0.0	0.0	0.0	0.0	0.0	0.0	0.0	0.0	0.0	0.0	1.0	0.0
RASGRP1	10125	symbol	H. sapiens	10125	H. sapiens	RASGRP1	RAS guanyl releasing protein 1	GO:0032825 positive regulation of natural killer cell differentiation;GO:0033089 positive regulation of T cell differentiation in thymus;GO:0032252 secretory granule localization		RAS pathway related proteins; Predicted intracellular proteins; Disease related genes	Cytosol (Supported); Additional: Plasma membrane		(M269)PID RAS PATHWAY; (M88)PID CD8 TCR PATHWAY; (M34)PID TCR PATHWAY	(M5941)HALLMARK UV RESPONSE UP; (M5906)HALLMARK ESTROGEN RESPONSE EARLY; (M5921)HALLMARK COMPLEMENT	1.0	0.0	1.0	0.0	0.0	1.0	0.0	0.0	0.0	0.0	0.0	0.0	0.0	1.0	1.0	1.0	0.0	0.0	0.0	0.0
ARL17A	51326	symbol	H. sapiens	51326	H. sapiens	ARL17A	ADP ribosylation factor like GTPase 17A			Predicted intracellular proteins					0.0	0.0	0.0	0.0	0.0	0.0	0.0	0.0	0.0	0.0	0.0	0.0	0.0	0.0	0.0	0.0	0.0	0.0	0.0	0.0
SNORA10	574042	symbol	H. sapiens	574042	H. sapiens	SNORA10	small nucleolar RNA, H/ACA box 10	GO:0006396 RNA processing;GO:0016070 RNA metabolic process;GO:0010467 gene expression							0.0	0.0	0.0	0.0	0.0	0.0	0.0	0.0	0.0	0.0	0.0	0.0	0.0	0.0	0.0	0.0	0.0	0.0	0.0	0.0
LOC100499194	100499194	Gene_ID	H. sapiens	100499194	H. sapiens	LOC100499194	uncharacterized LOC100499194								0.0	0.0	0.0	0.0	0.0	0.0	0.0	0.0	0.0	0.0	0.0	0.0	0.0	0.0	0.0	0.0	0.0	0.0	0.0	0.0
LRRC17	10234	symbol	H. sapiens	10234	H. sapiens	LRRC17	leucine rich repeat containing 17	GO:0048539 bone marrow development;GO:0045671 negative regulation of osteoclast differentiation;GO:0002762 negative regulation of myeloid leukocyte differentiation		Predicted secreted proteins	Vesicles (Approved); Additional: Cytokinetic bridge				1.0	0.0	0.0	0.0	0.0	0.0	0.0	0.0	0.0	0.0	0.0	0.0	0.0	0.0	1.0	0.0	0.0	0.0	0.0	0.0
SNHG24	79104	gene_synonym	H. sapiens	79104	H. sapiens	MEG8	maternally expressed 8, small nucleolar RNA host gene								0.0	0.0	0.0	0.0	0.0	0.0	0.0	0.0	0.0	0.0	0.0	0.0	0.0	0.0	0.0	0.0	0.0	0.0	0.0	0.0
ERBB3	2065	symbol	H. sapiens	2065	H. sapiens	ERBB3	erb-b2 receptor tyrosine kinase 3	GO:0055025 positive regulation of cardiac muscle tissue development;GO:0055024 regulation of cardiac muscle tissue development;GO:0070886 positive regulation of calcineurin-NFAT signaling cascade	Tyr protein kinase family	Cancer-related genes:Mutated cancer genes; Cancer-related genes:Candidate cancer biomarkers; Predicted secreted proteins; Human disease related genes:Congenital malformations:Congenital malformations of the musculoskeletal system; Kinases:Tyr protein kinases; Disease related genes; Potential drug targets; Enzymes; Human disease related genes:Endocrine and metabolic diseases:Diabetes; Predicted in…	Plasma membrane (Supported); Additional: Actin filaments	Tucatinib	(M201)PID ERBB NETWORK PATHWAY; (M175)PID ERBB2 ERBB3 PATHWAY; (M239)PID A6B1 A6B4 INTEGRIN PATHWAY	(M5902)HALLMARK APOPTOSIS; (M5909)HALLMARK MYOGENESIS	0.0	0.0	0.0	0.0	0.0	0.0	0.0	0.0	1.0	0.0	1.0	0.0	0.0	1.0	0.0	1.0	0.0	0.0	0.0	0.0
KCNG2	26251	symbol	H. sapiens	26251	H. sapiens	KCNG2	potassium voltage-gated channel modifier subfamily G member 2	GO:0071805 potassium ion transmembrane transport;GO:0006813 potassium ion transport;GO:0051260 protein homooligomerization		Voltage-gated ion channels:Voltage-Gated Potassium Channels					0.0	0.0	0.0	0.0	0.0	0.0	0.0	0.0	0.0	0.0	0.0	0.0	0.0	0.0	0.0	0.0	0.0	0.0	1.0	0.0
TBX2	6909	symbol	H. sapiens	6909	H. sapiens	TBX2	T-box transcription factor 2	GO:1901208 negative regulation of heart looping;GO:1901210 regulation of cardiac chamber formation;GO:1901211 negative regulation of cardiac chamber formation		Transcription factors:Immunoglobulin fold; Predicted intracellular proteins; Disease related genes	Nucleoplasm (Approved); Additional: Cytosol				0.0	0.0	0.0	0.0	0.0	0.0	0.0	0.0	1.0	0.0	0.0	1.0	0.0	0.0	0.0	0.0	1.0	1.0	0.0	1.0
TEAD4	7004	symbol	H. sapiens	7004	H. sapiens	TEAD4	TEA domain transcription factor 4	GO:0001830 trophectodermal cell fate commitment;GO:1902459 positive regulation of stem cell population maintenance;GO:0001829 trophectodermal cell differentiation		Transcription factors:Helix-turn-helix domains; Predicted intracellular proteins	Nucleoplasm (Supported)			(M5909)HALLMARK MYOGENESIS	1.0	0.0	0.0	0.0	0.0	0.0	0.0	0.0	1.0	1.0	0.0	0.0	0.0	0.0	0.0	0.0	0.0	0.0	0.0	0.0
COX16	51241	symbol	H. sapiens	51241	H. sapiens	COX16	cytochrome c oxidase assembly factor COX16	GO:0033617 mitochondrial cytochrome c oxidase assembly;GO:0008535 respiratory chain complex IV assembly;GO:0017004 cytochrome complex assembly		Transporters:Primary Active Transporters; Predicted intracellular proteins	Mitochondria (Supported)				1.0	0.0	0.0	0.0	0.0	0.0	0.0	0.0	0.0	0.0	0.0	0.0	0.0	0.0	0.0	0.0	0.0	0.0	0.0	0.0
NPM3	10360	symbol	H. sapiens	10360	H. sapiens	NPM3	nucleophosmin/nucleoplasmin 3	GO:0009303 rRNA transcription;GO:0098781 ncRNA transcription;GO:0006364 rRNA processing		Predicted intracellular proteins	Actin filaments;Cytosol;Nucleoli (Approved)				1.0	0.0	0.0	0.0	0.0	0.0	0.0	0.0	0.0	0.0	0.0	0.0	0.0	0.0	0.0	0.0	0.0	0.0	0.0	0.0
PHC2	1912	symbol	H. sapiens	1912	H. sapiens	PHC2	polyhomeotic homolog 2	GO:0045892 negative regulation of transcription, DNA-templated;GO:1903507 negative regulation of nucleic acid-templated transcription;GO:1902679 negative regulation of RNA biosynthetic process		Predicted intracellular proteins	Nucleoplasm (Supported)				1.0	0.0	0.0	0.0	0.0	0.0	0.0	0.0	0.0	0.0	1.0	0.0	0.0	0.0	0.0	0.0	0.0	0.0	0.0	0.0
ABCB9	23457	symbol	H. sapiens	23457	H. sapiens	ABCB9	ATP binding cassette subfamily B member 9	GO:0035672 oligopeptide transmembrane transport;GO:0006857 oligopeptide transport;GO:0019885 antigen processing and presentation of endogenous peptide antigen via MHC class I		Transporters:Primary Active Transporters; Predicted intracellular proteins	Vesicles (Supported)			(M5949)HALLMARK PEROXISOME	0.0	0.0	0.0	0.0	0.0	0.0	0.0	1.0	0.0	0.0	0.0	0.0	0.0	0.0	0.0	0.0	0.0	0.0	0.0	0.0
TIMM17B	10245	symbol	H. sapiens	10245	H. sapiens	TIMM17B	translocase of inner mitochondrial membrane 17B	GO:0030150 protein import into mitochondrial matrix;GO:0044743 protein transmembrane import into intracellular organelle;GO:0065002 intracellular protein transmembrane transport		Predicted intracellular proteins	Microtubules (Approved); Additional: Mitochondria				0.0	0.0	0.0	0.0	0.0	0.0	0.0	0.0	0.0	0.0	0.0	0.0	0.0	0.0	0.0	0.0	0.0	0.0	0.0	0.0
HIST1H4I	8294	gene_synonym	H. sapiens	8294	H. sapiens	H4C9	H4 clustered histone 9	GO:0045653 negative regulation of megakaryocyte differentiation;GO:0006335 DNA replication-dependent chromatin assembly;GO:0034723 DNA replication-dependent chromatin organization		Predicted intracellular proteins; Cancer-related genes; Disease related genes			(M32)PID HDAC CLASSIII PATHWAY		1.0	0.0	0.0	0.0	0.0	0.0	0.0	0.0	0.0	0.0	0.0	0.0	0.0	0.0	0.0	0.0	0.0	0.0	0.0	0.0
MDP1	145553	symbol	H. sapiens	145553	H. sapiens	MDP1	magnesium dependent phosphatase 1	GO:0035335 peptidyl-tyrosine dephosphorylation;GO:0006470 protein dephosphorylation;GO:0016311 dephosphorylation		Enzymes; ENZYME proteins:Hydrolases; Predicted intracellular proteins	Nucleoplasm (Approved)				0.0	0.0	0.0	0.0	0.0	0.0	0.0	0.0	0.0	0.0	0.0	0.0	0.0	0.0	0.0	0.0	0.0	0.0	0.0	0.0
SMO	6608	symbol	H. sapiens	6608	H. sapiens	SMO	smoothened, frizzled class receptor	GO:0007371 ventral midline determination;GO:0072036 mesenchymal to epithelial transition involved in renal vesicle formation;GO:0072285 mesenchymal to epithelial transition involved in metanephric renal vesicle formation		Transporters; FDA approved drug targets:Small molecule drugs; Human disease related genes:Cancers:Cancers of eye, brain, and central nervous system; G-protein coupled receptors:Family fz/smo receptors; Disease related genes; G-protein coupled receptors:GPCRs excl olfactory receptors; Cancer-related genes; Human disease related genes:Cancers:Skin cancers		Fluocinonide; Halcinonide; Vismodegib; Sonidegib; Glasdegib	(M211)PID HEDGEHOG 2PATHWAY; (M219)PID HEDGEHOG GLI PATHWAY		1.0	0.0	0.0	0.0	0.0	1.0	1.0	0.0	0.0	1.0	0.0	1.0	0.0	0.0	1.0	0.0	1.0	1.0	0.0	1.0
FAM96B	51647	gene_synonym	H. sapiens	51647	H. sapiens	CIAO2B	cytosolic iron-sulfur assembly component 2B	GO:0106035 protein maturation by [4Fe-4S] cluster transfer;GO:0097428 protein maturation by iron-sulfur cluster transfer;GO:0016226 iron-sulfur cluster assembly		Predicted intracellular proteins	Cytosol;Nucleoplasm (Supported)				0.0	0.0	0.0	0.0	0.0	0.0	0.0	0.0	0.0	0.0	0.0	0.0	0.0	0.0	0.0	0.0	0.0	0.0	0.0	0.0
DACT2	168002	symbol	H. sapiens	168002	H. sapiens	DACT2	dishevelled binding antagonist of beta catenin 2	GO:0072061 inner medullary collecting duct development;GO:1900108 negative regulation of nodal signaling pathway;GO:1900107 regulation of nodal signaling pathway		Predicted intracellular proteins			(M286)PID TGFBR PATHWAY		0.0	0.0	0.0	0.0	0.0	0.0	1.0	0.0	0.0	0.0	0.0	0.0	0.0	0.0	1.0	0.0	0.0	0.0	0.0	0.0
TPBG	7162	symbol	H. sapiens	7162	H. sapiens	TPBG	trophoblast glycoprotein	GO:0008355 olfactory learning;GO:0090497 mesenchymal cell migration;GO:0042048 olfactory behavior			Nucleoplasm (Approved)			(M5891)HALLMARK HYPOXIA; (M5906)HALLMARK ESTROGEN RESPONSE EARLY; (M5907)HALLMARK ESTROGEN RESPONSE LATE	0.0	0.0	0.0	0.0	0.0	0.0	1.0	0.0	0.0	1.0	0.0	0.0	0.0	0.0	0.0	0.0	0.0	1.0	0.0	0.0
BSCL2	26580	symbol	H. sapiens	26580	H. sapiens	BSCL2	BSCL2 lipid droplet biogenesis associated, seipin	GO:0140042 lipid droplet formation;GO:0050995 negative regulation of lipid catabolic process;GO:0034389 lipid droplet organization		Human disease related genes:Nervous system diseases:Other nervous and sensory system diseases; Predicted intracellular proteins; Disease related genes; Potential drug targets; Transporters:Transporter channels and pores; Human disease related genes:Nervous system diseases:Neurodegenerative diseases; Human disease related genes:Congenital disorders of metabolism:Other congenital disorders of metab…					0.0	0.0	0.0	0.0	0.0	0.0	0.0	0.0	0.0	0.0	0.0	0.0	0.0	0.0	0.0	0.0	0.0	0.0	0.0	0.0
SNORA16A	692073	symbol	H. sapiens	692073	H. sapiens	SNORA16A	small nucleolar RNA, H/ACA box 16A	GO:0006396 RNA processing;GO:0016070 RNA metabolic process;GO:0010467 gene expression							0.0	0.0	0.0	0.0	0.0	0.0	0.0	0.0	0.0	0.0	0.0	0.0	0.0	0.0	0.0	0.0	0.0	0.0	0.0	0.0
LYPD1	116372	symbol	H. sapiens	116372	H. sapiens	LYPD1	LY6/PLAUR domain containing 1	GO:1903077 negative regulation of protein localization to plasma membrane;GO:0007271 synaptic transmission, cholinergic;GO:0001662 behavioral fear response		Predicted intracellular proteins	Nucleoplasm (Approved); Additional: Plasma membrane;Vesicles				0.0	0.0	0.0	0.0	0.0	0.0	0.0	0.0	0.0	0.0	0.0	0.0	0.0	0.0	0.0	0.0	0.0	0.0	1.0	0.0
EPHB4	2050	symbol	H. sapiens	2050	H. sapiens	EPHB4	EPH receptor B4	GO:0002042 cell migration involved in sprouting angiogenesis;GO:0043534 blood vessel endothelial cell migration;GO:0048013 ephrin receptor signaling pathway	Tyr protein kinase family	Cancer-related genes:Candidate cancer biomarkers; Transporters:Accessory Factors Involved in Transport; Human disease related genes:Congenital malformations:Congenital malformations of the circulatory system; Human disease related genes:Congenital malformations:Congenital malformations of skin; Kinases:Tyr protein kinases; Disease related genes; Potential drug targets; Enzymes; Predicted intracel…		Dasatinib; N-(5-chloro-1,3-benzodioxol-4-yl)-6-methoxy-7-(3-piperidin-1-ylpropoxy)quinazolin-4-amine; N'-(5-CHLORO-1,3-BENZODIOXOL-4-YL)-N-(3,4,5- TRIMETHOXYPHENYL)PYRIMIDINE-2,4-DIAMINE; N'-(3-CHLORO-4-METHOXY-PHENYL)-N-(3,4,5-TRIMETHOXYPHENYL)-1,3,5-TRIAZINE-2,4-DIAMINE; 3-({4-[(5-chloro-1,3-benzodioxol-4-yl)amino]pyrimidin-2-yl}amino)benzenesulfonamide; N'-(5-chloro-1,3-benzodioxol-4-yl)-N-(3-…	(M257)PID EPHRINB REV PATHWAY; (M62)PID EPHB FWD PATHWAY	(M5916)HALLMARK APICAL SURFACE	0.0	0.0	0.0	0.0	0.0	0.0	1.0	1.0	1.0	0.0	0.0	0.0	0.0	0.0	0.0	1.0	0.0	1.0	0.0	0.0
GPR63	81491	symbol	H. sapiens	81491	H. sapiens	GPR63	G protein-coupled receptor 63	GO:0007186 G protein-coupled receptor signaling pathway;GO:0007165 signal transduction;GO:0023052 signaling		G-protein coupled receptors:GPCRs excl olfactory receptors	Cytosol;Nucleoplasm;Plasma membrane (Approved)				0.0	0.0	0.0	0.0	0.0	0.0	0.0	0.0	0.0	0.0	0.0	0.0	0.0	0.0	0.0	0.0	0.0	0.0	0.0	0.0
PANO1	101927423	symbol	H. sapiens	101927423	H. sapiens	PANO1	proapoptotic nucleolar protein 1	GO:0032435 negative regulation of proteasomal ubiquitin-dependent protein catabolic process;GO:2000059 negative regulation of ubiquitin-dependent protein catabolic process;GO:1901799 negative regulation of proteasomal protein catabolic process		Predicted intracellular proteins					0.0	0.0	0.0	0.0	0.0	0.0	0.0	0.0	0.0	0.0	0.0	0.0	0.0	0.0	0.0	0.0	0.0	0.0	0.0	0.0
F2RL1	2150	symbol	H. sapiens	2150	H. sapiens	F2RL1	F2R like trypsin receptor 1	GO:0070962 positive regulation of neutrophil mediated killing of bacterium;GO:0070963 positive regulation of neutrophil mediated killing of gram-negative bacterium;GO:0070960 positive regulation of neutrophil mediated cytotoxicity		G-protein coupled receptors:GPCRs excl olfactory receptors; Transporters	Plasma membrane (Approved)			(M5890)HALLMARK TNFA SIGNALING VIA NFKB; (M5953)HALLMARK KRAS SIGNALING UP	0.0	0.0	0.0	0.0	0.0	0.0	0.0	0.0	0.0	0.0	0.0	0.0	0.0	1.0	1.0	0.0	0.0	0.0	0.0	1.0
LOC100134868	100134868	Gene_ID	H. sapiens	100134868	H. sapiens	LOC100134868	uncharacterized LOC100134868								0.0	0.0	0.0	0.0	0.0	0.0	0.0	0.0	0.0	0.0	0.0	0.0	0.0	0.0	0.0	0.0	0.0	0.0	0.0	0.0
SLC7A5P1	81893	symbol	H. sapiens	81893	H. sapiens	SLC7A5P1	solute carrier family 7 member 5 pseudogene 1	GO:1902475 L-alpha-amino acid transmembrane transport;GO:0015807 L-amino acid transport;GO:0003333 amino acid transmembrane transport							0.0	0.0	0.0	0.0	0.0	0.0	0.0	0.0	0.0	0.0	0.0	0.0	0.0	0.0	0.0	0.0	0.0	0.0	0.0	0.0
SLITRK1	114798	symbol	H. sapiens	114798	H. sapiens	SLITRK1	SLIT and NTRK like family member 1	GO:0099560 synaptic membrane adhesion;GO:0099174 regulation of presynapse organization;GO:1905606 regulation of presynapse assembly		Predicted secreted proteins; Human disease related genes:Other diseases:Mental and behavioural disorders; Disease related genes					0.0	0.0	0.0	0.0	0.0	0.0	1.0	0.0	0.0	0.0	0.0	1.0	0.0	0.0	0.0	0.0	0.0	0.0	0.0	0.0
GLRX5	51218	symbol	H. sapiens	51218	H. sapiens	GLRX5	glutaredoxin 5	GO:0106034 protein maturation by [2Fe-2S] cluster transfer;GO:0044571 [2Fe-2S] cluster assembly;GO:0106035 protein maturation by [4Fe-4S] cluster transfer		Human disease related genes:Cardiovascular diseases:Hematologic diseases; Predicted intracellular proteins; Disease related genes	Mitochondria (Supported)			(M5945)HALLMARK HEME METABOLISM	0.0	0.0	0.0	0.0	0.0	0.0	0.0	0.0	0.0	0.0	0.0	0.0	0.0	0.0	1.0	0.0	0.0	0.0	0.0	0.0
NME2	4831	symbol	H. sapiens	4831	H. sapiens	NME2	NME/NM23 nucleoside diphosphate kinase 2	GO:0018106 peptidyl-histidine phosphorylation;GO:0006228 UTP biosynthetic process;GO:0006183 GTP biosynthetic process		Enzymes; Predicted intracellular proteins; ENZYME proteins:Transferases; Cancer-related genes:Candidate cancer biomarkers	Cytosol (Supported); Additional: Midbody ring;Plasma membrane		(M66)PID MYC ACTIV PATHWAY		1.0	0.0	0.0	0.0	0.0	0.0	0.0	0.0	0.0	0.0	0.0	0.0	0.0	0.0	0.0	0.0	0.0	0.0	0.0	0.0
CTB-113P19.1						None	None	None	None	None	None	None	None	None	nan	nan	nan	nan	nan	nan	nan	nan	nan	nan	nan	nan	nan	nan	nan	nan	nan	nan	nan	nan
ELAVL2	1993	symbol	H. sapiens	1993	H. sapiens	ELAVL2	ELAV like RNA binding protein 2	GO:0006355 regulation of transcription, DNA-templated;GO:1903506 regulation of nucleic acid-templated transcription;GO:2001141 regulation of RNA biosynthetic process		Predicted intracellular proteins	Nucleoplasm (Approved); Additional: Cytosol				0.0	0.0	0.0	0.0	0.0	0.0	0.0	0.0	0.0	0.0	0.0	0.0	0.0	0.0	0.0	0.0	0.0	0.0	0.0	0.0
SYNGR3	9143	symbol	H. sapiens	9143	H. sapiens	SYNGR3	synaptogyrin 3	GO:0001504 neurotransmitter uptake;GO:0021762 substantia nigra development;GO:0048857 neural nucleus development		Predicted intracellular proteins	Plasma membrane (Approved)				0.0	0.0	0.0	0.0	0.0	0.0	0.0	0.0	0.0	0.0	0.0	0.0	0.0	0.0	0.0	0.0	0.0	0.0	0.0	0.0
AGO2	27161	symbol	H. sapiens	27161	H. sapiens	AGO2	argonaute RISC catalytic component 2	GO:0090625 mRNA destabilization-mediated gene silencing by siRNA;GO:0045974 regulation of translation, ncRNA-mediated;GO:0045975 positive regulation of translation, ncRNA-mediated		Enzymes; ENZYME proteins:Hydrolases; Predicted intracellular proteins	Cytoplasmic bodies (Supported); Additional: Cytosol			(M5941)HALLMARK UV RESPONSE UP	1.0	0.0	0.0	0.0	0.0	0.0	0.0	1.0	0.0	0.0	1.0	0.0	0.0	0.0	0.0	1.0	0.0	0.0	0.0	0.0
PPM1H	57460	symbol	H. sapiens	57460	H. sapiens	PPM1H	protein phosphatase, Mg2+/Mn2+ dependent 1H	GO:0006470 protein dephosphorylation;GO:0016311 dephosphorylation;GO:0006796 phosphate-containing compound metabolic process		Enzymes; ENZYME proteins:Hydrolases; Predicted intracellular proteins	Nucleoplasm (Supported)				0.0	0.0	0.0	0.0	0.0	0.0	0.0	0.0	0.0	0.0	0.0	0.0	0.0	0.0	0.0	0.0	0.0	0.0	0.0	0.0
SARM1	23098	symbol	H. sapiens	23098	H. sapiens	SARM1	sterile alpha and TIR motif containing 1	GO:0034128 negative regulation of MyD88-independent toll-like receptor signaling pathway;GO:0034127 regulation of MyD88-independent toll-like receptor signaling pathway;GO:0019677 NAD catabolic process		Enzymes; ENZYME proteins:Hydrolases; Predicted intracellular proteins	Mitochondria (Supported)				0.0	0.0	0.0	0.0	0.0	0.0	0.0	0.0	0.0	0.0	0.0	0.0	0.0	1.0	0.0	0.0	0.0	0.0	0.0	0.0
SOX11	6664	symbol	H. sapiens	6664	H. sapiens	SOX11	SRY-box transcription factor 11	GO:2001109 regulation of lens epithelial cell proliferation;GO:2001111 positive regulation of lens epithelial cell proliferation;GO:0061386 closure of optic fissure		Human disease related genes:Other diseases:Mental and behavioural disorders; Human disease related genes:Congenital malformations:Other congenital malformations; Disease related genes; Transcription factors:Other all-alpha-helical DNA-binding domains; Predicted intracellular proteins	Nucleoplasm (Supported); Additional: Plasma membrane				1.0	0.0	0.0	0.0	0.0	0.0	1.0	0.0	0.0	0.0	0.0	0.0	0.0	0.0	0.0	0.0	0.0	1.0	0.0	0.0
MYB	4602	symbol	H. sapiens	4602	H. sapiens	MYB	MYB proto-oncogene, transcription factor	GO:0051574 positive regulation of histone H3-K9 methylation;GO:1901533 negative regulation of hematopoietic progenitor cell differentiation;GO:0045624 positive regulation of T-helper cell differentiation		Transcription factors:Helix-turn-helix domains; Human disease related genes:Cancers:Head and neck cancers; Cancer-related genes:Mutated cancer genes; Cancer-related genes:Mutational cancer driver genes; Predicted intracellular proteins	Nucleoplasm (Supported); Additional: Cytosol		(M143)PID IL2 PI3K PATHWAY; (M288)PID HES HEY PATHWAY; (M28)PID IL4 2PATHWAY	(M5906)HALLMARK ESTROGEN RESPONSE EARLY; (M5907)HALLMARK ESTROGEN RESPONSE LATE	1.0	0.0	1.0	0.0	0.0	0.0	0.0	0.0	1.0	0.0	0.0	0.0	0.0	0.0	0.0	0.0	0.0	0.0	0.0	0.0
ECE2	9718	symbol	H. sapiens	9718	H. sapiens	ECE2	endothelin converting enzyme 2	GO:0016486 peptide hormone processing;GO:0140448 signaling receptor ligand precursor processing;GO:0016485 protein processing		Enzymes; ENZYME proteins:Hydrolases; Peptidases:Metallopeptidases					0.0	0.0	0.0	0.0	0.0	0.0	0.0	1.0	0.0	0.0	0.0	0.0	0.0	0.0	0.0	0.0	0.0	0.0	0.0	0.0
PPM1L	151742	symbol	H. sapiens	151742	H. sapiens	PPM1L	protein phosphatase, Mg2+/Mn2+ dependent 1L	GO:0030148 sphingolipid biosynthetic process;GO:0046467 membrane lipid biosynthetic process;GO:0006665 sphingolipid metabolic process		Enzymes; ENZYME proteins:Hydrolases; Predicted intracellular proteins	Cytosol (Approved); Additional: Nucleoplasm				0.0	0.0	0.0	0.0	0.0	0.0	0.0	0.0	1.0	0.0	0.0	0.0	0.0	0.0	0.0	0.0	0.0	0.0	0.0	0.0
SCARNA22	677770	symbol	H. sapiens	677770	H. sapiens	SCARNA22	small Cajal body-specific RNA 22	GO:0006396 RNA processing;GO:0016070 RNA metabolic process;GO:0010467 gene expression							0.0	0.0	0.0	0.0	0.0	0.0	0.0	0.0	0.0	0.0	0.0	0.0	0.0	0.0	0.0	0.0	0.0	0.0	0.0	0.0
AARSD1	80755	symbol	H. sapiens	80755	H. sapiens	AARSD1	alanyl-tRNA synthetase domain containing 1	GO:0006419 alanyl-tRNA aminoacylation;GO:0106074 aminoacyl-tRNA metabolism involved in translational fidelity;GO:0006450 regulation of translational fidelity		Predicted intracellular proteins	Cytosol;Nuclear membrane (Approved)				0.0	0.0	0.0	0.0	0.0	0.0	0.0	1.0	0.0	0.0	0.0	0.0	0.0	0.0	0.0	0.0	0.0	0.0	0.0	0.0
ZNF121	7675	symbol	H. sapiens	7675	H. sapiens	ZNF121	zinc finger protein 121	GO:0006357 regulation of transcription by RNA polymerase II;GO:0006355 regulation of transcription, DNA-templated;GO:1903506 regulation of nucleic acid-templated transcription		Predicted intracellular proteins; Transcription factors:Zinc-coordinating DNA-binding domains	Centrosome;Nucleoplasm (Approved); Additional: Nucleoli				0.0	0.0	0.0	0.0	0.0	0.0	0.0	0.0	0.0	0.0	0.0	0.0	0.0	0.0	0.0	0.0	0.0	0.0	0.0	0.0
SCARNA9	619383	symbol	H. sapiens	619383	H. sapiens	SCARNA9	small Cajal body-specific RNA 9	GO:0006396 RNA processing;GO:0016070 RNA metabolic process;GO:0010467 gene expression							0.0	0.0	0.0	0.0	0.0	0.0	0.0	0.0	0.0	0.0	0.0	0.0	0.0	0.0	0.0	0.0	0.0	0.0	0.0	0.0
TSPAN7	7102	symbol	H. sapiens	7102	H. sapiens	TSPAN7	tetraspanin 7			Human disease related genes:Other diseases:Mental and behavioural disorders; CD markers; Transporters:Accessory Factors Involved in Transport; Disease related genes; Potential drug targets				(M5953)HALLMARK KRAS SIGNALING UP	0.0	0.0	1.0	0.0	0.0	0.0	0.0	0.0	0.0	0.0	0.0	0.0	0.0	0.0	0.0	0.0	0.0	0.0	0.0	0.0
CSRP1	1465	symbol	H. sapiens	1465	H. sapiens	CSRP1	cysteine and glycine rich protein 1	GO:0045214 sarcomere organization;GO:0070527 platelet aggregation;GO:0034109 homotypic cell-cell adhesion		Predicted intracellular proteins		Artenimol		(M5946)HALLMARK COAGULATION; (M5921)HALLMARK COMPLEMENT	1.0	0.0	0.0	0.0	0.0	0.0	1.0	0.0	0.0	0.0	0.0	0.0	0.0	1.0	1.0	0.0	0.0	0.0	0.0	0.0
SNORD94	692225	symbol	H. sapiens	692225	H. sapiens	SNORD94	small nucleolar RNA, C/D box 94	GO:0006396 RNA processing;GO:0016070 RNA metabolic process;GO:0010467 gene expression							0.0	0.0	0.0	0.0	0.0	0.0	0.0	0.0	0.0	0.0	0.0	0.0	0.0	0.0	0.0	0.0	0.0	0.0	0.0	0.0
TXNDC5	81567	symbol	H. sapiens	81567	H. sapiens	TXNDC5	thioredoxin domain containing 5	GO:0043277 apoptotic cell clearance;GO:0006909 phagocytosis;GO:0043066 negative regulation of apoptotic process		Predicted intracellular proteins	Endoplasmic reticulum (Approved)				0.0	0.0	0.0	0.0	0.0	0.0	0.0	0.0	0.0	0.0	0.0	0.0	0.0	0.0	0.0	0.0	0.0	0.0	0.0	0.0
TMPPE	643853	symbol	H. sapiens	643853	H. sapiens	TMPPE	transmembrane protein with metallophosphoesterase domain			Predicted intracellular proteins	Mitochondria;Nucleoplasm (Approved)				0.0	0.0	0.0	0.0	0.0	0.0	0.0	0.0	0.0	0.0	0.0	0.0	0.0	0.0	0.0	0.0	0.0	0.0	0.0	0.0
LOC100133091	100133091	Gene_ID	H. sapiens	100133091	H. sapiens	LOC100133091	uncharacterized LOC100133091								0.0	0.0	0.0	0.0	0.0	0.0	0.0	0.0	0.0	0.0	0.0	0.0	0.0	0.0	0.0	0.0	0.0	0.0	0.0	0.0
HIST1H4L	8368	gene_synonym	H. sapiens	8368	H. sapiens	H4C13	H4 clustered histone 13	GO:0045653 negative regulation of megakaryocyte differentiation;GO:0006335 DNA replication-dependent chromatin assembly;GO:0034723 DNA replication-dependent chromatin organization		Predicted intracellular proteins; Disease related genes					1.0	0.0	0.0	0.0	0.0	0.0	0.0	0.0	0.0	0.0	0.0	0.0	0.0	0.0	0.0	0.0	0.0	0.0	0.0	0.0
ZNF850	342892	symbol	H. sapiens	342892	H. sapiens	ZNF850	zinc finger protein 850	GO:0045944 positive regulation of transcription by RNA polymerase II;GO:0045893 positive regulation of transcription, DNA-templated;GO:1903508 positive regulation of nucleic acid-templated transcription		Predicted intracellular proteins	Nucleoplasm (Approved)				0.0	0.0	0.0	0.0	0.0	0.0	0.0	0.0	0.0	0.0	0.0	0.0	0.0	0.0	0.0	0.0	0.0	0.0	0.0	0.0
LOC389906	389906	Gene_ID	H. sapiens	389906	H. sapiens	LOC389906	zinc finger protein 839 pseudogene								0.0	0.0	0.0	0.0	0.0	0.0	0.0	0.0	0.0	0.0	0.0	0.0	0.0	0.0	0.0	0.0	0.0	0.0	0.0	0.0
MRPL14	64928	symbol	H. sapiens	64928	H. sapiens	MRPL14	mitochondrial ribosomal protein L14			Ribosomal proteins; Predicted intracellular proteins	Mitochondria (Supported)				0.0	0.0	0.0	0.0	0.0	0.0	0.0	1.0	0.0	0.0	0.0	0.0	0.0	0.0	0.0	0.0	0.0	0.0	0.0	0.0
ITPRIP	85450	symbol	H. sapiens	85450	H. sapiens	ITPRIP	inositol 1,4,5-trisphosphate receptor interacting protein	GO:1902042 negative regulation of extrinsic apoptotic signaling pathway via death domain receptors;GO:1902041 regulation of extrinsic apoptotic signaling pathway via death domain receptors;GO:2001237 negative regulation of extrinsic apoptotic signaling pathway			Vesicles (Uncertain)				0.0	0.0	0.0	0.0	0.0	0.0	0.0	0.0	0.0	0.0	0.0	0.0	0.0	0.0	0.0	0.0	0.0	0.0	0.0	0.0
ZNF771	51333	symbol	H. sapiens	51333	H. sapiens	ZNF771	zinc finger protein 771	GO:0006357 regulation of transcription by RNA polymerase II;GO:0006355 regulation of transcription, DNA-templated;GO:1903506 regulation of nucleic acid-templated transcription		Predicted intracellular proteins; Transcription factors:Zinc-coordinating DNA-binding domains	Nucleoli;Nucleoplasm (Enhanced)				0.0	0.0	0.0	0.0	0.0	0.0	0.0	0.0	0.0	0.0	0.0	0.0	0.0	0.0	0.0	0.0	0.0	0.0	0.0	0.0
CDC42EP5	148170	symbol	H. sapiens	148170	H. sapiens	CDC42EP5	CDC42 effector protein 5	GO:0031272 regulation of pseudopodium assembly;GO:0031274 positive regulation of pseudopodium assembly;GO:0007254 JNK cascade		Predicted intracellular proteins					1.0	0.0	0.0	0.0	0.0	0.0	0.0	0.0	0.0	0.0	1.0	0.0	0.0	0.0	0.0	1.0	0.0	0.0	0.0	1.0
SNHG16	100507246	symbol	H. sapiens	100507246	H. sapiens	SNHG16	small nucleolar RNA host gene 16								0.0	0.0	0.0	0.0	0.0	0.0	0.0	0.0	0.0	0.0	0.0	0.0	0.0	0.0	0.0	0.0	0.0	0.0	0.0	0.0
RPL13AP20	387841	symbol	H. sapiens	387841	H. sapiens	RPL13AP20	ribosomal protein L13a pseudogene 20								0.0	0.0	0.0	0.0	0.0	0.0	0.0	0.0	0.0	0.0	0.0	0.0	0.0	0.0	0.0	0.0	0.0	0.0	0.0	0.0
GCSH	2653	symbol	H. sapiens	2653	H. sapiens	GCSH	glycine cleavage system protein H	GO:0006546 glycine catabolic process;GO:0019464 glycine decarboxylation via glycine cleavage system;GO:0009249 protein lipoylation		Human disease related genes:Congenital disorders of metabolism:Congenital disorders of amino acid metabolism; Predicted intracellular proteins; Disease related genes	Vesicles (Approved)	6-(Hydroxyethyldithio)-8-(Aminomethylthio)Octanoic Acid; Dihydrolipoic Acid			0.0	0.0	0.0	0.0	0.0	0.0	0.0	1.0	0.0	0.0	0.0	0.0	0.0	0.0	0.0	0.0	0.0	0.0	0.0	0.0
BATF3	55509	symbol	H. sapiens	55509	H. sapiens	BATF3	basic leucine zipper ATF-like transcription factor 3	GO:0043011 myeloid dendritic cell differentiation;GO:0001773 myeloid dendritic cell activation;GO:0097028 dendritic cell differentiation		Transcription factors:Basic domains; Predicted intracellular proteins	Nucleoli (Supported); Additional: Cytosol;Nucleoplasm		(M235)PID TCR CALCIUM PATHWAY; (M60)PID NFAT TFPATHWAY	(M5947)HALLMARK IL2 STAT5 SIGNALING	0.0	0.0	0.0	0.0	0.0	0.0	0.0	0.0	0.0	0.0	0.0	0.0	0.0	0.0	1.0	0.0	0.0	0.0	0.0	0.0
DCAKD	79877	symbol	H. sapiens	79877	H. sapiens	DCAKD	dephospho-CoA kinase domain containing	GO:0015937 coenzyme A biosynthetic process;GO:0015936 coenzyme A metabolic process;GO:0033866 nucleoside bisphosphate biosynthetic process		Predicted intracellular proteins	Nucleoplasm (Approved)				1.0	0.0	0.0	0.0	0.0	0.0	0.0	0.0	0.0	0.0	0.0	0.0	0.0	0.0	0.0	0.0	0.0	0.0	0.0	0.0
SNORA64	26784	symbol	H. sapiens	26784	H. sapiens	SNORA64	small nucleolar RNA, H/ACA box 64	GO:0006396 RNA processing;GO:0016070 RNA metabolic process;GO:0010467 gene expression							0.0	0.0	0.0	0.0	0.0	0.0	0.0	0.0	0.0	0.0	0.0	0.0	0.0	0.0	0.0	0.0	0.0	0.0	0.0	0.0
LAMA5	3911	symbol	H. sapiens	3911	H. sapiens	LAMA5	laminin subunit alpha 5	GO:0060445 branching involved in salivary gland morphogenesis;GO:0007435 salivary gland morphogenesis;GO:0007431 salivary gland development		Predicted secreted proteins; Predicted intracellular proteins	Vesicles (Approved)	Lanoteplase	(M158)PID INTEGRIN4 PATHWAY; (M5887)NABA BASEMENT MEMBRANES; (M198)PID SYNDECAN 1 PATHWAY		0.0	0.0	1.0	0.0	0.0	1.0	1.0	0.0	1.0	0.0	0.0	0.0	1.0	0.0	0.0	0.0	1.0	1.0	0.0	0.0
PRR26	414235	gene_synonym	H. sapiens	414235	H. sapiens	DIP2C-AS1	DIP2C antisense RNA 1								0.0	0.0	0.0	0.0	0.0	0.0	0.0	0.0	0.0	0.0	0.0	0.0	0.0	0.0	0.0	0.0	0.0	0.0	0.0	0.0
AP3S2	10239	symbol	H. sapiens	10239	H. sapiens	AP3S2	adaptor related protein complex 3 subunit sigma 2	GO:0048490 anterograde synaptic vesicle transport;GO:0099514 synaptic vesicle cytoskeletal transport;GO:0099517 synaptic vesicle transport along microtubule		Predicted intracellular proteins	Vesicles (Approved)				0.0	0.0	0.0	0.0	0.0	0.0	0.0	0.0	0.0	0.0	0.0	0.0	0.0	0.0	0.0	0.0	0.0	0.0	0.0	0.0
GCHFR	2644	symbol	H. sapiens	2644	H. sapiens	GCHFR	GTP cyclohydrolase I feedback regulator	GO:0043095 regulation of GTP cyclohydrolase I activity;GO:0043105 negative regulation of GTP cyclohydrolase I activity;GO:0006809 nitric oxide biosynthetic process		Predicted intracellular proteins	Nucleoplasm (Supported)				0.0	0.0	0.0	0.0	0.0	0.0	0.0	0.0	0.0	0.0	0.0	0.0	0.0	0.0	0.0	0.0	0.0	0.0	0.0	0.0
IQGAP2	10788	symbol	H. sapiens	10788	H. sapiens	IQGAP2	IQ motif containing GTPase activating protein 2	GO:0070493 thrombin-activated receptor signaling pathway;GO:0034314 Arp2/3 complex-mediated actin nucleation;GO:0045010 actin nucleation		Predicted intracellular proteins	Plasma membrane;Vesicles (Approved)			(M5908)HALLMARK ANDROGEN RESPONSE	1.0	0.0	0.0	0.0	0.0	0.0	0.0	0.0	0.0	0.0	0.0	0.0	0.0	1.0	0.0	0.0	0.0	0.0	0.0	0.0
MPP4	58538	symbol	H. sapiens	58538	H. sapiens	MPP4	MAGUK p55 scaffold protein 4	GO:0035418 protein localization to synapse;GO:1902414 protein localization to cell junction;GO:0008104 protein localization		Predicted intracellular proteins	Cytosol (Supported); Additional: Actin filaments				0.0	0.0	0.0	0.0	0.0	0.0	0.0	0.0	0.0	0.0	0.0	0.0	0.0	0.0	0.0	0.0	0.0	0.0	0.0	0.0
POU3F3	5455	symbol	H. sapiens	5455	H. sapiens	POU3F3	POU class 3 homeobox 3	GO:0072024 macula densa development;GO:0072051 juxtaglomerular apparatus development;GO:0072206 metanephric juxtaglomerular apparatus development		Transcription factors:Helix-turn-helix domains; Predicted intracellular proteins; Human disease related genes:Other diseases:Mental and behavioural disorders; Disease related genes	Nucleoplasm (Enhanced)				0.0	0.0	0.0	0.0	0.0	0.0	0.0	0.0	0.0	0.0	0.0	0.0	0.0	0.0	0.0	0.0	1.0	0.0	0.0	0.0
GLIS1	148979	symbol	H. sapiens	148979	H. sapiens	GLIS1	GLIS family zinc finger 1	GO:0000122 negative regulation of transcription by RNA polymerase II;GO:0045944 positive regulation of transcription by RNA polymerase II;GO:0045892 negative regulation of transcription, DNA-templated		Predicted intracellular proteins; Transcription factors:Zinc-coordinating DNA-binding domains	Nucleoplasm (Approved); Additional: Cytosol;Mitochondria				0.0	0.0	0.0	0.0	0.0	0.0	0.0	0.0	0.0	0.0	0.0	0.0	0.0	0.0	0.0	0.0	0.0	0.0	0.0	0.0
TBC1D24	57465	symbol	H. sapiens	57465	H. sapiens	TBC1D24	TBC1 domain family member 24	GO:0036475 neuron death in response to oxidative stress;GO:0036473 cell death in response to oxidative stress;GO:0070997 neuron death		Human disease related genes:Nervous system diseases:Epilepsy; Human disease related genes:Nervous system diseases:Ear disease; Human disease related genes:Congenital malformations:Other congenital malformations; Disease related genes; Predicted intracellular proteins	Cell Junctions;Plasma membrane (Supported)				0.0	0.0	0.0	0.0	0.0	0.0	1.0	0.0	0.0	0.0	0.0	0.0	0.0	0.0	0.0	0.0	0.0	0.0	0.0	0.0
NEFM	4741	symbol	H. sapiens	4741	H. sapiens	NEFM	neurofilament medium chain	GO:0033693 neurofilament bundle assembly;GO:0045110 intermediate filament bundle assembly;GO:0045109 intermediate filament organization		Predicted intracellular proteins	Intermediate filaments (Enhanced)				0.0	0.0	0.0	0.0	0.0	0.0	0.0	0.0	0.0	0.0	0.0	0.0	0.0	0.0	0.0	0.0	0.0	0.0	0.0	0.0
AATK	9625	symbol	H. sapiens	9625	H. sapiens	AATK	apoptosis associated tyrosine kinase	GO:0038083 peptidyl-tyrosine autophosphorylation;GO:0018108 peptidyl-tyrosine phosphorylation;GO:0018212 peptidyl-tyrosine modification	Tyr protein kinase family	Transporters:Accessory Factors Involved in Transport; Kinases:Tyr protein kinases; Enzymes; Predicted intracellular proteins; ENZYME proteins:Transferases	Mitochondria (Uncertain)				0.0	0.0	0.0	0.0	0.0	0.0	0.0	0.0	0.0	0.0	0.0	0.0	0.0	0.0	0.0	0.0	0.0	0.0	0.0	0.0
RPS29	6235	symbol	H. sapiens	6235	H. sapiens	RPS29	ribosomal protein S29	GO:0002181 cytoplasmic translation;GO:0006412 translation;GO:0043043 peptide biosynthetic process		Human disease related genes:Other congenital disorders:Ribosomopathies; Human disease related genes:Cardiovascular diseases:Hematologic diseases; Ribosomal proteins; Disease related genes; Predicted intracellular proteins	Cytosol;Endoplasmic reticulum (Supported)				1.0	0.0	0.0	0.0	0.0	0.0	0.0	1.0	0.0	0.0	0.0	0.0	0.0	0.0	0.0	0.0	0.0	0.0	0.0	0.0
TSPAN14	81619	symbol	H. sapiens	81619	H. sapiens	TSPAN14	tetraspanin 14	GO:0045747 positive regulation of Notch signaling pathway;GO:0008593 regulation of Notch signaling pathway;GO:0072659 protein localization to plasma membrane		Transporters:Accessory Factors Involved in Transport	Vesicles (Supported)				1.0	0.0	0.0	0.0	0.0	0.0	0.0	0.0	0.0	0.0	0.0	0.0	0.0	0.0	0.0	0.0	0.0	0.0	0.0	0.0
HAS2-AS1	594842	symbol	H. sapiens	594842	H. sapiens	HAS2-AS1	HAS2 antisense RNA 1								0.0	0.0	0.0	0.0	0.0	0.0	0.0	0.0	0.0	0.0	0.0	0.0	0.0	0.0	0.0	0.0	0.0	0.0	0.0	0.0
ZNF70	7621	symbol	H. sapiens	7621	H. sapiens	ZNF70	zinc finger protein 70	GO:0006357 regulation of transcription by RNA polymerase II;GO:0006355 regulation of transcription, DNA-templated;GO:1903506 regulation of nucleic acid-templated transcription		Predicted intracellular proteins; Transcription factors:Zinc-coordinating DNA-binding domains	Cytosol (Approved)				0.0	0.0	0.0	0.0	0.0	0.0	0.0	0.0	0.0	0.0	0.0	0.0	0.0	0.0	0.0	0.0	0.0	0.0	0.0	0.0
AFAP1	60312	symbol	H. sapiens	60312	H. sapiens	AFAP1	actin filament associated protein 1	GO:0051493 regulation of cytoskeleton organization;GO:0033043 regulation of organelle organization;GO:0051128 regulation of cellular component organization		Predicted intracellular proteins	Actin filaments;Cytosol (Supported); Additional: Focal adhesion sites				0.0	0.0	0.0	0.0	0.0	0.0	0.0	0.0	0.0	0.0	0.0	0.0	0.0	0.0	0.0	0.0	0.0	0.0	0.0	0.0
NXPH4	11247	symbol	H. sapiens	11247	H. sapiens	NXPH4	neurexophilin 4	GO:0007218 neuropeptide signaling pathway;GO:0007186 G protein-coupled receptor signaling pathway;GO:0007165 signal transduction		Predicted secreted proteins					0.0	0.0	0.0	0.0	0.0	0.0	0.0	0.0	0.0	0.0	0.0	0.0	0.0	0.0	0.0	0.0	0.0	0.0	0.0	0.0
LOC439994	439994	Gene_ID	H. sapiens	439994	H. sapiens	LINC00863	long intergenic non-protein coding RNA 863								0.0	0.0	0.0	0.0	0.0	0.0	0.0	0.0	0.0	0.0	0.0	0.0	0.0	0.0	0.0	0.0	0.0	0.0	0.0	0.0
HIST1H3I	8354	gene_synonym	H. sapiens	8354	H. sapiens	H3C11	H3 clustered histone 11	GO:0006335 DNA replication-dependent chromatin assembly;GO:0034723 DNA replication-dependent chromatin organization;GO:0032200 telomere organization		Predicted intracellular proteins; Disease related genes					1.0	0.0	1.0	0.0	0.0	0.0	0.0	0.0	0.0	0.0	0.0	0.0	0.0	0.0	0.0	0.0	0.0	0.0	0.0	0.0
B3GALT6	126792	symbol	H. sapiens	126792	H. sapiens	B3GALT6	beta-1,3-galactosyltransferase 6	GO:0030206 chondroitin sulfate biosynthetic process;GO:0015012 heparan sulfate proteoglycan biosynthetic process;GO:0050650 chondroitin sulfate proteoglycan biosynthetic process		Human disease related genes:Congenital malformations:Congenital malformations of skin; Human disease related genes:Congenital malformations:Congenital malformations of the musculoskeletal system; Disease related genes; Potential drug targets; Enzymes; Predicted intracellular proteins; ENZYME proteins:Transferases				(M5891)HALLMARK HYPOXIA; (M5937)HALLMARK GLYCOLYSIS	0.0	0.0	0.0	0.0	0.0	0.0	0.0	0.0	0.0	0.0	0.0	0.0	0.0	0.0	0.0	0.0	0.0	0.0	0.0	0.0
ZNF747	65988	symbol	H. sapiens	65988	H. sapiens	ZNF747	zinc finger protein 747	GO:0006355 regulation of transcription, DNA-templated;GO:1903506 regulation of nucleic acid-templated transcription;GO:2001141 regulation of RNA biosynthetic process		Predicted intracellular proteins	Centrosome;Cytosol (Approved)				0.0	0.0	0.0	0.0	0.0	0.0	0.0	0.0	0.0	0.0	0.0	0.0	0.0	0.0	0.0	0.0	0.0	0.0	0.0	0.0
CNKSR3	154043	symbol	H. sapiens	154043	H. sapiens	CNKSR3	CNKSR family member 3	GO:2000651 positive regulation of sodium ion transmembrane transporter activity;GO:1902307 positive regulation of sodium ion transmembrane transport;GO:0033137 negative regulation of peptidyl-serine phosphorylation		Predicted intracellular proteins	Cytosol (Supported); Additional: Mitochondria				0.0	0.0	0.0	0.0	0.0	0.0	0.0	0.0	0.0	0.0	0.0	0.0	0.0	0.0	0.0	0.0	0.0	0.0	1.0	0.0
MT1F	4494	symbol	H. sapiens	4494	H. sapiens	MT1F	metallothionein 1F	GO:0010273 detoxification of copper ion;GO:1990169 stress response to copper ion;GO:0061687 detoxification of inorganic compound		Predicted intracellular proteins					1.0	0.0	0.0	0.0	0.0	0.0	0.0	0.0	0.0	0.0	0.0	0.0	0.0	0.0	0.0	0.0	0.0	0.0	0.0	1.0
RNF215	200312	symbol	H. sapiens	200312	H. sapiens	RNF215	ring finger protein 215	GO:0006896 Golgi to vacuole transport;GO:0006623 protein targeting to vacuole;GO:0072666 establishment of protein localization to vacuole		Predicted intracellular proteins	Microtubules (Approved); Additional: Nucleoli				0.0	0.0	0.0	0.0	0.0	0.0	0.0	0.0	0.0	0.0	0.0	0.0	0.0	0.0	0.0	0.0	0.0	0.0	0.0	0.0
GDF15	9518	symbol	H. sapiens	9518	H. sapiens	GDF15	growth differentiation factor 15	GO:0060400 negative regulation of growth hormone receptor signaling pathway;GO:0060398 regulation of growth hormone receptor signaling pathway;GO:0002023 reduction of food intake in response to dietary excess		Predicted secreted proteins; Predicted intracellular proteins; Disease related genes; Cancer-related genes:Candidate cancer biomarkers	Golgi apparatus (Enhanced)		(M256)PID TAP63 PATHWAY; (M19)PID P73PATHWAY; (M145)PID P53 DOWNSTREAM PATHWAY		0.0	0.0	0.0	0.0	0.0	1.0	0.0	0.0	1.0	0.0	0.0	0.0	0.0	0.0	0.0	1.0	0.0	0.0	0.0	1.0
AGRN	375790	symbol	H. sapiens	375790	H. sapiens	AGRN	agrin	GO:0045887 positive regulation of synaptic assembly at neuromuscular junction;GO:1904398 positive regulation of neuromuscular junction development;GO:0008582 regulation of synaptic assembly at neuromuscular junction		Human disease related genes:Nervous system diseases:Other nervous and sensory system diseases; Transporters:Accessory Factors Involved in Transport; Predicted secreted proteins; Disease related genes; Potential drug targets; Predicted intracellular proteins	Cytosol (Approved); Additional: Plasma membrane		(M5887)NABA BASEMENT MEMBRANES; (M3008)NABA ECM GLYCOPROTEINS; (M5884)NABA CORE MATRISOME	(M5909)HALLMARK MYOGENESIS; (M5937)HALLMARK GLYCOLYSIS	0.0	0.0	0.0	0.0	0.0	0.0	1.0	1.0	0.0	0.0	0.0	0.0	1.0	0.0	0.0	0.0	0.0	0.0	0.0	1.0
AHCTF1P1	285116	symbol	H. sapiens	285116	H. sapiens	AHCTF1P1	AT-hook containing transcription factor 1 pseudogene 1								0.0	0.0	0.0	0.0	0.0	0.0	0.0	0.0	0.0	0.0	0.0	0.0	0.0	0.0	0.0	0.0	0.0	0.0	0.0	0.0
IFT27	11020	symbol	H. sapiens	11020	H. sapiens	IFT27	intraflagellar transport 27	GO:0060122 inner ear receptor cell stereocilium organization;GO:0042073 intraciliary transport;GO:0060119 inner ear receptor cell development		Predicted intracellular proteins; Disease related genes; Human disease related genes:Congenital disorders of metabolism:Other congenital disorders of metabolism					0.0	0.0	0.0	0.0	0.0	0.0	1.0	0.0	0.0	0.0	0.0	0.0	0.0	0.0	0.0	0.0	0.0	0.0	0.0	0.0
LUC7L2	51631	symbol	H. sapiens	51631	H. sapiens	LUC7L2	LUC7 like 2, pre-mRNA splicing factor	GO:0006376 mRNA splice site selection;GO:0000245 spliceosomal complex assembly;GO:0022618 ribonucleoprotein complex assembly		Predicted intracellular proteins	Nucleoplasm (Approved)				0.0	0.0	0.0	0.0	0.0	0.0	0.0	1.0	0.0	0.0	0.0	0.0	0.0	0.0	0.0	0.0	0.0	0.0	0.0	0.0
HDGFRP3	50810	gene_synonym	H. sapiens	50810	H. sapiens	HDGFL3	HDGF like 3	GO:0007026 negative regulation of microtubule depolymerization;GO:0031114 regulation of microtubule depolymerization;GO:0046785 microtubule polymerization		Predicted intracellular proteins	Nucleoplasm (Supported)				0.0	0.0	0.0	0.0	0.0	0.0	1.0	0.0	0.0	0.0	0.0	0.0	0.0	0.0	0.0	0.0	0.0	0.0	0.0	0.0
ISG15	9636	symbol	H. sapiens	9636	H. sapiens	ISG15	ISG15 ubiquitin like modifier	GO:0032461 positive regulation of protein oligomerization;GO:0032459 regulation of protein oligomerization;GO:0032020 ISG15-protein conjugation		Human disease related genes:Immune system diseases:Primary immunodeficiency; Predicted secreted proteins; Predicted intracellular proteins; Disease related genes				(M5911)HALLMARK INTERFERON ALPHA RESPONSE; (M5913)HALLMARK INTERFERON GAMMA RESPONSE	1.0	0.0	1.0	0.0	0.0	1.0	0.0	1.0	0.0	0.0	0.0	0.0	0.0	0.0	0.0	0.0	0.0	0.0	0.0	0.0
LOC100289580	100289580	Gene_ID	H. sapiens	100289580	H. sapiens	LOC100289580	uncharacterized LOC100289580								0.0	0.0	0.0	0.0	0.0	0.0	0.0	0.0	0.0	0.0	0.0	0.0	0.0	0.0	0.0	0.0	0.0	0.0	0.0	0.0
SNORA7B	677797	symbol	H. sapiens	677797	H. sapiens	SNORA7B	small nucleolar RNA, H/ACA box 7B	GO:0006396 RNA processing;GO:0016070 RNA metabolic process;GO:0010467 gene expression							0.0	0.0	0.0	0.0	0.0	0.0	0.0	0.0	0.0	0.0	0.0	0.0	0.0	0.0	0.0	0.0	0.0	0.0	0.0	0.0
COL4A5	1287	symbol	H. sapiens	1287	H. sapiens	COL4A5	collagen type IV alpha 5 chain	GO:0038063 collagen-activated tyrosine kinase receptor signaling pathway;GO:0038065 collagen-activated signaling pathway;GO:0007528 neuromuscular junction development		Human disease related genes:Reproductive system diseases:Reproductive system diseases; Cancer-related genes:Candidate cancer biomarkers; Predicted secreted proteins; Human disease related genes:Congenital malformations:Other congenital malformations; Disease related genes; Predicted intracellular proteins	Plasma membrane (Approved); Additional: Vesicles		(M5887)NABA BASEMENT MEMBRANES; (M53)PID INTEGRIN3 PATHWAY; (M3005)NABA COLLAGENS		0.0	0.0	0.0	0.0	0.0	1.0	0.0	1.0	1.0	0.0	0.0	0.0	1.0	0.0	0.0	0.0	0.0	0.0	0.0	0.0
GLRX2	51022	symbol	H. sapiens	51022	H. sapiens	GLRX2	glutaredoxin 2	GO:0042262 DNA protection;GO:0051775 response to redox state;GO:0071450 cellular response to oxygen radical		Predicted intracellular proteins	Nucleoplasm (Supported); Additional: Vesicles	Glutathione		(M5938)HALLMARK REACTIVE OXYGEN SPECIES PATHWAY	0.0	0.0	0.0	0.0	0.0	0.0	0.0	1.0	0.0	0.0	0.0	0.0	0.0	0.0	0.0	0.0	0.0	0.0	0.0	0.0
SLC7A5	8140	symbol	H. sapiens	8140	H. sapiens	SLC7A5	solute carrier family 7 member 5	GO:0015823 phenylalanine transport;GO:1904556 L-tryptophan transmembrane transport;GO:0098713 leucine import across plasma membrane		Transporters:Electrochemical Potential-driven transporters	Cytosol;Plasma membrane (Supported); Additional: Vesicles			(M5922)HALLMARK UNFOLDED PROTEIN RESPONSE; (M5901)HALLMARK G2M CHECKPOINT; (M5906)HALLMARK ESTROGEN RESPONSE EARLY	0.0	0.0	1.0	0.0	0.0	0.0	0.0	1.0	1.0	0.0	0.0	0.0	0.0	0.0	0.0	0.0	0.0	0.0	0.0	0.0
SNORA53	677832	symbol	H. sapiens	677832	H. sapiens	SNORA53	small nucleolar RNA, H/ACA box 53	GO:0006396 RNA processing;GO:0016070 RNA metabolic process;GO:0010467 gene expression							0.0	0.0	0.0	0.0	0.0	0.0	0.0	0.0	0.0	0.0	0.0	0.0	0.0	0.0	0.0	0.0	0.0	0.0	0.0	0.0
GOLGA3	2802	symbol	H. sapiens	2802	H. sapiens	GOLGA3	golgin A3	GO:0007283 spermatogenesis;GO:0048232 male gamete generation;GO:0007276 gamete generation		Predicted intracellular proteins	Golgi apparatus (Supported); Additional: Nucleoplasm				1.0	0.0	0.0	0.0	0.0	0.0	0.0	0.0	0.0	0.0	0.0	0.0	0.0	0.0	0.0	0.0	0.0	0.0	0.0	0.0
CACNA2D3	55799	symbol	H. sapiens	55799	H. sapiens	CACNA2D3	calcium voltage-gated channel auxiliary subunit alpha2delta 3	GO:0070588 calcium ion transmembrane transport;GO:0006816 calcium ion transport;GO:0034765 regulation of ion transmembrane transport		Transporters:Accessory Factors Involved in Transport; FDA approved drug targets:Small molecule drugs; Predicted intracellular proteins	Nucleoplasm (Uncertain)	Amlodipine; Nilvadipine			0.0	0.0	0.0	0.0	0.0	0.0	0.0	0.0	0.0	0.0	0.0	0.0	0.0	0.0	0.0	1.0	0.0	0.0	1.0	0.0
SYNGR2	9144	symbol	H. sapiens	9144	H. sapiens	SYNGR2	synaptogyrin 2	GO:0048499 synaptic vesicle membrane organization;GO:0045055 regulated exocytosis;GO:0006887 exocytosis		Predicted intracellular proteins	Golgi apparatus (Approved)			(M5947)HALLMARK IL2 STAT5 SIGNALING; (M5909)HALLMARK MYOGENESIS	0.0	0.0	0.0	0.0	0.0	0.0	0.0	0.0	0.0	0.0	0.0	0.0	0.0	0.0	0.0	0.0	0.0	0.0	0.0	0.0
EPHA5	2044	symbol	H. sapiens	2044	H. sapiens	EPHA5	EPH receptor A5	GO:0032793 positive regulation of CREB transcription factor activity;GO:0019933 cAMP-mediated signaling;GO:0019935 cyclic-nucleotide-mediated signaling	Tyr protein kinase family	Enzymes; Kinases:Tyr protein kinases; ENZYME proteins:Transferases		Dasatinib; Fostamatinib	(M177)PID EPHA FWDPATHWAY	(M5956)HALLMARK KRAS SIGNALING DN	0.0	0.0	0.0	0.0	0.0	0.0	1.0	1.0	1.0	0.0	0.0	0.0	0.0	0.0	0.0	1.0	0.0	0.0	0.0	0.0
CBWD5	220869	symbol	H. sapiens	220869	H. sapiens	CBWD5	COBW domain containing 5			Predicted intracellular proteins	Plasma membrane (Approved)				0.0	0.0	0.0	0.0	0.0	0.0	0.0	0.0	0.0	0.0	0.0	0.0	0.0	0.0	0.0	0.0	0.0	0.0	0.0	0.0
PYCR1	5831	symbol	H. sapiens	5831	H. sapiens	PYCR1	pyrroline-5-carboxylate reductase 1	GO:0006561 proline biosynthetic process;GO:0055129 L-proline biosynthetic process;GO:0006560 proline metabolic process		ENZYME proteins:Oxidoreductases; Human disease related genes:Congenital malformations:Congenital malformations of skin; Disease related genes; Potential drug targets; Enzymes; Predicted intracellular proteins		NADH; Proline		(M5934)HALLMARK XENOBIOTIC METABOLISM	1.0	0.0	0.0	0.0	0.0	0.0	0.0	1.0	0.0	0.0	0.0	0.0	0.0	0.0	0.0	0.0	0.0	0.0	0.0	0.0
ENDOV	284131	symbol	H. sapiens	284131	H. sapiens	ENDOV	endonuclease V	GO:0090502 RNA phosphodiester bond hydrolysis, endonucleolytic;GO:0090501 RNA phosphodiester bond hydrolysis;GO:0090305 nucleic acid phosphodiester bond hydrolysis		Predicted intracellular proteins					0.0	0.0	0.0	0.0	0.0	0.0	0.0	0.0	0.0	0.0	0.0	0.0	0.0	0.0	0.0	0.0	0.0	0.0	0.0	0.0
HDAC4	9759	symbol	H. sapiens	9759	H. sapiens	HDAC4	histone deacetylase 4	GO:0014877 response to muscle inactivity involved in regulation of muscle adaptation;GO:0014894 response to denervation involved in regulation of muscle adaptation;GO:0034983 peptidyl-lysine deacetylation		FDA approved drug targets:Small molecule drugs; ENZYME proteins:Hydrolases; Disease related genes; Enzymes; Human disease related genes:Other congenital disorders:Chromosomal abnormalities; Predicted intracellular proteins	Nuclear speckles (Supported); Additional: Cytosol;Nucleoplasm	Zinc; Romidepsin; N-hydroxy-5-[(3-phenyl-5,6-dihydroimidazo[1,2-a]pyrazin-7(8H)-yl)carbonyl]thiophene-2-carboxamide; 2,2,2-TRIFLUORO-1-{5-[(3-PHENYL-5,6-DIHYDROIMIDAZO[1,2-A]PYRAZIN-7(8H)-YL)CARBONYL]THIOPHEN-2-YL}ETHANE-1,1-DIOL; Zinc acetate; Zinc chloride; Zinc sulfate, unspecified form	(M140)PID RANBP2 PATHWAY; (M32)PID HDAC CLASSIII PATHWAY; (M30)PID HDAC CLASSII PATHWAY		1.0	0.0	1.0	0.0	0.0	0.0	0.0	0.0	0.0	0.0	0.0	0.0	0.0	0.0	1.0	0.0	0.0	0.0	0.0	0.0
LOC221946	221946	Gene_ID	H. sapiens	221946	H. sapiens	LOC221946	uncharacterized LOC221946								0.0	0.0	0.0	0.0	0.0	0.0	0.0	0.0	0.0	0.0	0.0	0.0	0.0	0.0	0.0	0.0	0.0	0.0	0.0	0.0
NOS1	4842	symbol	H. sapiens	4842	H. sapiens	NOS1	nitric oxide synthase 1	GO:0098923 retrograde trans-synaptic signaling by soluble gas;GO:0098924 retrograde trans-synaptic signaling by nitric oxide;GO:0051581 negative regulation of neurotransmitter uptake		FDA approved drug targets:Small molecule drugs; ENZYME proteins:Oxidoreductases; Cancer-related genes:Candidate cancer biomarkers; Enzymes; Predicted intracellular proteins	Plasma membrane (Supported); Additional: Nucleoplasm	Citrulline; Donepezil; Ketamine; L-N(omega)-Nitroarginine-2,4-L-diaminobutyric amide; Formic acid; 3-Bromo-7-Nitroindazole; N-{(4S)-4-Amino-5-[(2-aminoethyl)amino]pentyl}-N'-nitroguanidine; N-[3-(aminomethyl)benzyl]acetamidine; L-N(omega)-nitroarginine-(4R)-amino-L-proline amide; 1-hydroxy-2-isopropylguanidine; N-omega-propyl-L-arginine; 2-butyl-1-hydroxyguanidine; S-Ethyl-N-[4-(Trifluoromethyl)P…		(M5951)HALLMARK SPERMATOGENESIS; (M5909)HALLMARK MYOGENESIS; (M5956)HALLMARK KRAS SIGNALING DN	0.0	0.0	1.0	0.0	0.0	0.0	0.0	0.0	1.0	0.0	0.0	0.0	1.0	0.0	0.0	1.0	0.0	0.0	1.0	1.0
SOBP	55084	symbol	H. sapiens	55084	H. sapiens	SOBP	sine oculis binding protein homolog	GO:0090102 cochlea development;GO:0042472 inner ear morphogenesis;GO:0042471 ear morphogenesis		Predicted intracellular proteins; Human disease related genes:Other diseases:Mental and behavioural disorders; Disease related genes	Nucleoplasm (Approved); Additional: Vesicles				0.0	0.0	0.0	0.0	0.0	0.0	0.0	0.0	0.0	0.0	0.0	0.0	0.0	0.0	0.0	0.0	0.0	0.0	0.0	0.0
GPR135	64582	symbol	H. sapiens	64582	H. sapiens	GPR135	G protein-coupled receptor 135	GO:0007186 G protein-coupled receptor signaling pathway;GO:0007165 signal transduction;GO:0023052 signaling		G-protein coupled receptors:GPCRs excl olfactory receptors					0.0	0.0	0.0	0.0	0.0	0.0	0.0	0.0	0.0	0.0	0.0	0.0	0.0	0.0	0.0	0.0	0.0	0.0	0.0	0.0
MLLT11	10962	symbol	H. sapiens	10962	H. sapiens	MLLT11	MLLT11 transcription factor 7 cofactor	GO:0051901 positive regulation of mitochondrial depolarization;GO:1904181 positive regulation of membrane depolarization;GO:0051900 regulation of mitochondrial depolarization		Predicted intracellular proteins; Disease related genes; Cancer-related genes:Candidate cancer biomarkers	Cytosol;Nucleoplasm (Supported)			(M5924)HALLMARK MTORC1 SIGNALING	0.0	0.0	0.0	0.0	0.0	0.0	0.0	0.0	0.0	0.0	0.0	0.0	0.0	0.0	0.0	0.0	0.0	0.0	0.0	0.0
DLG3	1741	symbol	H. sapiens	1741	H. sapiens	DLG3	discs large MAGUK scaffold protein 3	GO:0001736 establishment of planar polarity;GO:0007164 establishment of tissue polarity;GO:0099072 regulation of postsynaptic membrane neurotransmitter receptor levels		Predicted intracellular proteins; Human disease related genes:Other diseases:Mental and behavioural disorders; Disease related genes	Nucleoli;Nucleoplasm (Approved)				0.0	0.0	0.0	0.0	0.0	1.0	0.0	1.0	0.0	1.0	0.0	0.0	0.0	0.0	0.0	1.0	0.0	0.0	0.0	0.0
SLC7A11-AS1	641364	symbol	H. sapiens	641364	H. sapiens	SLC7A11-AS1	SLC7A11 antisense RNA 1								0.0	0.0	0.0	0.0	0.0	0.0	0.0	0.0	0.0	0.0	0.0	0.0	0.0	0.0	0.0	0.0	0.0	0.0	0.0	0.0
BCL11A	53335	symbol	H. sapiens	53335	H. sapiens	BCL11A	BAF chromatin remodeling complex subunit BCL11A	GO:1904799 regulation of neuron remodeling;GO:1904800 negative regulation of neuron remodeling;GO:2000173 negative regulation of branching morphogenesis of a nerve		Human disease related genes:Other diseases:Mental and behavioural disorders; Cancer-related genes:Candidate cancer biomarkers; Transcription factors:Zinc-coordinating DNA-binding domains; Disease related genes; Predicted intracellular proteins	Nucleoplasm (Supported); Additional: Nuclear bodies				1.0	0.0	0.0	0.0	0.0	0.0	0.0	0.0	0.0	0.0	0.0	0.0	0.0	0.0	0.0	0.0	1.0	0.0	0.0	1.0
HIST1H2BK	85236	gene_synonym	H. sapiens	85236	H. sapiens	H2BC12	H2B clustered histone 12	GO:0002227 innate immune response in mucosa;GO:0002385 mucosal immune response;GO:0031640 killing of cells of other organism		Predicted intracellular proteins	Nucleoplasm (Approved); Additional: Cytosol			(M5901)HALLMARK G2M CHECKPOINT	1.0	1.0	0.0	1.0	0.0	0.0	0.0	0.0	0.0	0.0	0.0	0.0	0.0	0.0	0.0	0.0	0.0	0.0	0.0	0.0
SNORA71C	677839	symbol	H. sapiens	677839	H. sapiens	SNORA71C	small nucleolar RNA, H/ACA box 71C	GO:0006396 RNA processing;GO:0016070 RNA metabolic process;GO:0010467 gene expression							0.0	0.0	0.0	0.0	0.0	0.0	0.0	0.0	0.0	0.0	0.0	0.0	0.0	0.0	0.0	0.0	0.0	0.0	0.0	0.0
MAFG-AS1	92659	gene_synonym	H. sapiens	92659	H. sapiens	MAFG-DT	MAFG divergent transcript								0.0	0.0	0.0	0.0	0.0	0.0	0.0	0.0	0.0	0.0	0.0	0.0	0.0	0.0	0.0	0.0	0.0	0.0	0.0	0.0
MEG9	100507257	symbol	H. sapiens	100507257	H. sapiens	MEG9	maternally expressed 9								0.0	0.0	0.0	0.0	0.0	0.0	0.0	0.0	0.0	0.0	0.0	0.0	0.0	0.0	0.0	0.0	0.0	0.0	0.0	0.0
HIST1H2AJ	8331	gene_synonym	H. sapiens	8331	H. sapiens	H2AC14	H2A clustered histone 14			Predicted intracellular proteins	Nucleoplasm (Approved)				1.0	1.0	0.0	0.0	0.0	0.0	0.0	0.0	0.0	0.0	0.0	0.0	0.0	0.0	0.0	0.0	0.0	0.0	0.0	0.0
HIST1H2BM	8342	gene_synonym	H. sapiens	8342	H. sapiens	H2BC14	H2B clustered histone 14	GO:0006334 nucleosome assembly;GO:0031497 chromatin assembly;GO:0034728 nucleosome organization		Predicted intracellular proteins	Nucleoplasm (Approved); Additional: Cytosol				1.0	1.0	0.0	1.0	0.0	0.0	0.0	1.0	0.0	0.0	0.0	0.0	0.0	0.0	0.0	0.0	0.0	0.0	0.0	0.0
SNORA68	26780	symbol	H. sapiens	26780	H. sapiens	SNORA68	small nucleolar RNA, H/ACA box 68	GO:0006396 RNA processing;GO:0016070 RNA metabolic process;GO:0010467 gene expression							0.0	0.0	0.0	0.0	0.0	0.0	0.0	0.0	0.0	0.0	0.0	0.0	0.0	0.0	0.0	0.0	0.0	0.0	0.0	0.0
IGF2BP3	10643	symbol	H. sapiens	10643	H. sapiens	IGF2BP3	insulin like growth factor 2 mRNA binding protein 3	GO:0051028 mRNA transport;GO:0050657 nucleic acid transport;GO:0050658 RNA transport		Predicted intracellular proteins	Cytosol (Supported)				0.0	0.0	0.0	0.0	0.0	0.0	0.0	1.0	0.0	0.0	0.0	0.0	0.0	0.0	0.0	0.0	0.0	0.0	0.0	0.0
SPSB4	92369	symbol	H. sapiens	92369	H. sapiens	SPSB4	splA/ryanodine receptor domain and SOCS box containing 4	GO:1902916 positive regulation of protein polyubiquitination;GO:1902914 regulation of protein polyubiquitination;GO:0042752 regulation of circadian rhythm		Predicted intracellular proteins	Golgi apparatus;Nucleoplasm (Approved)				0.0	0.0	0.0	0.0	0.0	0.0	0.0	0.0	0.0	0.0	0.0	0.0	0.0	0.0	0.0	0.0	0.0	0.0	0.0	0.0
SMARCD3	6604	symbol	H. sapiens	6604	H. sapiens	SMARCD3	SWI/SNF related, matrix associated, actin dependent regulator of chromatin, subfamily d, member 3	GO:0003219 cardiac right ventricle formation;GO:0003211 cardiac ventricle formation;GO:0003139 secondary heart field specification		Predicted intracellular proteins	Nucleoplasm (Enhanced)		(M87)PID LKB1 PATHWAY; (M256)PID TAP63 PATHWAY		1.0	0.0	0.0	0.0	0.0	1.0	1.0	0.0	0.0	0.0	1.0	0.0	0.0	0.0	0.0	0.0	0.0	0.0	0.0	0.0
SNORD33	26818	symbol	H. sapiens	26818	H. sapiens	SNORD33	small nucleolar RNA, C/D box 33	GO:0006396 RNA processing;GO:0016070 RNA metabolic process;GO:0010467 gene expression							0.0	0.0	0.0	0.0	0.0	0.0	0.0	0.0	0.0	0.0	0.0	0.0	0.0	0.0	0.0	0.0	0.0	0.0	0.0	0.0
AQP3	360	symbol	H. sapiens	360	H. sapiens	AQP3	aquaporin 3 (Gill blood group)	GO:0070295 renal water absorption;GO:0003097 renal water transport;GO:0090650 cellular response to oxygen-glucose deprivation		Blood group antigen proteins	Plasma membrane (Supported)	Sennosides	(M232)PID ECADHERIN STABILIZATION PATHWAY	(M5941)HALLMARK UV RESPONSE UP; (M5906)HALLMARK ESTROGEN RESPONSE EARLY; (M5945)HALLMARK HEME METABOLISM	0.0	0.0	0.0	0.0	0.0	0.0	0.0	0.0	0.0	0.0	0.0	0.0	0.0	0.0	0.0	0.0	0.0	0.0	0.0	0.0
SLFNL1-AS1	100507178	symbol	H. sapiens	100507178	H. sapiens	SLFNL1-AS1	SLFNL1 antisense RNA 1								0.0	0.0	0.0	0.0	0.0	0.0	0.0	0.0	0.0	0.0	0.0	0.0	0.0	0.0	0.0	0.0	0.0	0.0	0.0	0.0
PGAM1P5	100132594	symbol	H. sapiens	100132594	H. sapiens	PGAM1P5	phosphoglycerate mutase 1 pseudogene 5								0.0	0.0	0.0	0.0	0.0	0.0	0.0	0.0	0.0	0.0	0.0	0.0	0.0	0.0	0.0	0.0	0.0	0.0	0.0	0.0
SNORA44	677825	symbol	H. sapiens	677825	H. sapiens	SNORA44	small nucleolar RNA, H/ACA box 44	GO:0006396 RNA processing;GO:0016070 RNA metabolic process;GO:0010467 gene expression							0.0	0.0	0.0	0.0	0.0	0.0	0.0	0.0	0.0	0.0	0.0	0.0	0.0	0.0	0.0	0.0	0.0	0.0	0.0	0.0
ZYG11A	440590	symbol	H. sapiens	440590	H. sapiens	ZYG11A	zyg-11 family member A, cell cycle regulator			Predicted intracellular proteins	Nucleoplasm (Approved)				0.0	0.0	0.0	0.0	0.0	0.0	0.0	0.0	0.0	0.0	0.0	0.0	0.0	0.0	0.0	0.0	0.0	0.0	0.0	0.0
STAG3L3	442578	symbol	H. sapiens	442578	H. sapiens	STAG3L3	stromal antigen 3-like 3 (pseudogene)	GO:0007062 sister chromatid cohesion;GO:0000819 sister chromatid segregation;GO:0098813 nuclear chromosome segregation							0.0	0.0	0.0	0.0	0.0	0.0	0.0	0.0	0.0	0.0	0.0	0.0	0.0	0.0	0.0	0.0	0.0	0.0	0.0	0.0
NOCT	25819	symbol	H. sapiens	25819	H. sapiens	NOCT	nocturnin	GO:0000290 deadenylation-dependent decapping of nuclear-transcribed mRNA;GO:0110156 methylguanosine-cap decapping;GO:0033962 P-body assembly		Predicted intracellular proteins	Nuclear bodies (Supported); Additional: Cytosol;Nucleoplasm			(M5891)HALLMARK HYPOXIA	1.0	0.0	0.0	0.0	0.0	0.0	0.0	0.0	0.0	0.0	0.0	0.0	0.0	0.0	0.0	0.0	0.0	0.0	0.0	0.0
SLC25A25	114789	symbol	H. sapiens	114789	H. sapiens	SLC25A25	solute carrier family 25 member 25	GO:0015867 ATP transport;GO:0032094 response to food;GO:0051503 adenine nucleotide transport		Transporters:Electrochemical Potential-driven transporters; Predicted intracellular proteins	Mitochondria;Vesicles (Supported)				0.0	0.0	0.0	0.0	0.0	0.0	0.0	0.0	0.0	0.0	0.0	1.0	0.0	0.0	0.0	0.0	0.0	0.0	0.0	0.0
CGA	1081	symbol	H. sapiens	1081	H. sapiens	CGA	glycoprotein hormones, alpha polypeptide	GO:0046884 follicle-stimulating hormone secretion;GO:0032275 luteinizing hormone secretion;GO:0032274 gonadotropin secretion		Predicted secreted proteins; Cancer-related genes:Candidate cancer biomarkers			(M115)PID REG GR PATHWAY		0.0	0.0	0.0	0.0	0.0	0.0	0.0	1.0	0.0	0.0	0.0	1.0	0.0	0.0	0.0	0.0	0.0	0.0	1.0	1.0
NUDT3	11165	symbol	H. sapiens	11165	H. sapiens	NUDT3	nudix hydrolase 3	GO:0071544 diphosphoinositol polyphosphate catabolic process;GO:0071543 diphosphoinositol polyphosphate metabolic process;GO:1901906 diadenosine pentaphosphate metabolic process		Enzymes; ENZYME proteins:Hydrolases; Predicted intracellular proteins	Cytosol (Approved)				0.0	0.0	0.0	0.0	0.0	0.0	0.0	0.0	0.0	0.0	0.0	0.0	0.0	0.0	0.0	0.0	0.0	0.0	0.0	0.0
TIMM8B	26521	symbol	H. sapiens	26521	H. sapiens	TIMM8B	translocase of inner mitochondrial membrane 8 homolog B	GO:0045039 protein insertion into mitochondrial inner membrane;GO:0051204 protein insertion into mitochondrial membrane;GO:0090151 establishment of protein localization to mitochondrial membrane		Predicted intracellular proteins				(M5936)HALLMARK OXIDATIVE PHOSPHORYLATION	0.0	0.0	0.0	0.0	0.0	0.0	0.0	0.0	0.0	0.0	0.0	0.0	0.0	0.0	0.0	0.0	0.0	0.0	0.0	0.0
PYCR2	29920	symbol	H. sapiens	29920	H. sapiens	PYCR2	pyrroline-5-carboxylate reductase 2	GO:0006561 proline biosynthetic process;GO:0055129 L-proline biosynthetic process;GO:0006560 proline metabolic process		ENZYME proteins:Oxidoreductases; Human disease related genes:Congenital disorders of metabolism:Congenital disorders of lipid/glycolipid metabolism; Disease related genes; Potential drug targets; Enzymes; Predicted intracellular proteins	Mitochondria (Approved)	NADH; Proline			1.0	0.0	0.0	0.0	0.0	0.0	0.0	1.0	0.0	0.0	0.0	0.0	0.0	0.0	0.0	0.0	0.0	0.0	0.0	0.0
PRMT1	3276	symbol	H. sapiens	3276	H. sapiens	PRMT1	protein arginine methyltransferase 1	GO:0019919 peptidyl-arginine methylation, to asymmetrical-dimethyl arginine;GO:0046985 positive regulation of hemoglobin biosynthetic process;GO:0043985 histone H4-R3 methylation		Enzymes; Predicted intracellular proteins; ENZYME proteins:Transferases	Nucleoplasm (Supported)	S-adenosyl-L-homocysteine	(M145)PID P53 DOWNSTREAM PATHWAY		1.0	0.0	0.0	0.0	0.0	0.0	1.0	0.0	0.0	0.0	0.0	0.0	0.0	0.0	0.0	0.0	0.0	0.0	0.0	0.0
SHC4	399694	symbol	H. sapiens	399694	H. sapiens	SHC4	SHC adaptor protein 4	GO:0048863 stem cell differentiation;GO:0007169 transmembrane receptor protein tyrosine kinase signaling pathway;GO:0007167 enzyme linked receptor protein signaling pathway		RAS pathway related proteins; Predicted intracellular proteins	Cytosol (Approved)				1.0	0.0	0.0	0.0	0.0	1.0	0.0	0.0	1.0	0.0	0.0	0.0	1.0	0.0	0.0	1.0	0.0	0.0	0.0	0.0
SYNM	23336	symbol	H. sapiens	23336	H. sapiens	SYNM	synemin	GO:0031443 fast-twitch skeletal muscle fiber contraction;GO:0003010 voluntary skeletal muscle contraction;GO:0014721 twitch skeletal muscle contraction		Predicted intracellular proteins	Intermediate filaments (Supported)				0.0	0.0	0.0	0.0	0.0	0.0	0.0	0.0	0.0	0.0	0.0	0.0	0.0	0.0	0.0	0.0	0.0	0.0	0.0	0.0
CCDC28B	79140	symbol	H. sapiens	79140	H. sapiens	CCDC28B	coiled-coil domain containing 28B	GO:0060271 cilium assembly;GO:0044782 cilium organization;GO:0120031 plasma membrane bounded cell projection assembly		Predicted intracellular proteins; Disease related genes					0.0	0.0	0.0	0.0	0.0	0.0	0.0	0.0	0.0	0.0	0.0	0.0	0.0	0.0	0.0	0.0	0.0	0.0	0.0	0.0
FOXK1	221937	symbol	H. sapiens	221937	H. sapiens	FOXK1	forkhead box K1	GO:0006735 NADH regeneration;GO:0061621 canonical glycolysis;GO:0061718 glucose catabolic process to pyruvate		Transcription factors:Helix-turn-helix domains; Predicted intracellular proteins	Nucleoplasm (Supported); Additional: Nucleoli fibrillar center				0.0	1.0	0.0	0.0	0.0	0.0	0.0	0.0	0.0	0.0	0.0	0.0	0.0	0.0	0.0	0.0	0.0	0.0	0.0	0.0
HIST1H4F	8361	gene_synonym	H. sapiens	8361	H. sapiens	H4C6	H4 clustered histone 6	GO:0045653 negative regulation of megakaryocyte differentiation;GO:0006335 DNA replication-dependent chromatin assembly;GO:0034723 DNA replication-dependent chromatin organization		Predicted intracellular proteins; Disease related genes					1.0	0.0	0.0	0.0	0.0	0.0	0.0	0.0	0.0	0.0	0.0	0.0	0.0	0.0	0.0	0.0	0.0	0.0	0.0	0.0
NDUFB11	54539	symbol	H. sapiens	54539	H. sapiens	NDUFB11	NADH:ubiquinone oxidoreductase subunit B11	GO:0010257 NADH dehydrogenase complex assembly;GO:0032981 mitochondrial respiratory chain complex I assembly;GO:0033108 mitochondrial respiratory chain complex assembly		Human disease related genes:Congenital malformations:Other congenital malformations; Disease related genes; Human disease related genes:Congenital disorders of metabolism:Mitochondrial diseases	Mitochondria (Approved)				0.0	0.0	0.0	0.0	0.0	0.0	0.0	0.0	0.0	0.0	0.0	0.0	0.0	0.0	0.0	0.0	0.0	0.0	0.0	0.0
RBM15	64783	symbol	H. sapiens	64783	H. sapiens	RBM15	RNA binding motif protein 15	GO:0038163 thrombopoietin-mediated signaling pathway;GO:0007221 positive regulation of transcription of Notch receptor target;GO:0009048 dosage compensation by inactivation of X chromosome		Predicted intracellular proteins; Cancer-related genes; Disease related genes	Nucleoplasm (Enhanced)				1.0	0.0	1.0	0.0	0.0	0.0	0.0	0.0	0.0	0.0	0.0	0.0	0.0	0.0	1.0	0.0	0.0	1.0	0.0	0.0
HID1	283987	symbol	H. sapiens	283987	H. sapiens	HID1	HID1 domain containing			Predicted intracellular proteins	Cytosol;Golgi apparatus (Supported)				0.0	0.0	0.0	0.0	0.0	0.0	0.0	0.0	0.0	0.0	0.0	0.0	0.0	0.0	0.0	0.0	0.0	0.0	0.0	0.0
ZNF518B	85460	symbol	H. sapiens	85460	H. sapiens	ZNF518B	zinc finger protein 518B	GO:0006325 chromatin organization;GO:0051276 chromosome organization;GO:0006357 regulation of transcription by RNA polymerase II		Predicted intracellular proteins; Transcription factors:Zinc-coordinating DNA-binding domains	Nucleoplasm (Approved)				1.0	0.0	0.0	0.0	0.0	0.0	0.0	0.0	0.0	0.0	0.0	0.0	0.0	0.0	0.0	0.0	0.0	0.0	0.0	0.0
SCARNA16	677781	symbol	H. sapiens	677781	H. sapiens	SCARNA16	small Cajal body-specific RNA 16	GO:0006396 RNA processing;GO:0016070 RNA metabolic process;GO:0010467 gene expression							0.0	0.0	0.0	0.0	0.0	0.0	0.0	0.0	0.0	0.0	0.0	0.0	0.0	0.0	0.0	0.0	0.0	0.0	0.0	0.0
PRSS3	5646	symbol	H. sapiens	5646	H. sapiens	PRSS3	serine protease 3	GO:0031638 zymogen activation;GO:0043542 endothelial cell migration;GO:0010631 epithelial cell migration		ENZYME proteins:Hydrolases; Predicted secreted proteins; Enzymes; Predicted intracellular proteins; Peptidases:Serine-type peptidases	Vesicles (Approved); Additional: Endoplasmic reticulum	4-(1,3,2-Dioxaborolan-2-Yloxy)Butan-1-Aminium; 4-Hydroxybutan-1-Aminium; 4-(Hydroxymethyl)Benzamidine; Benzamidine; Diamino-N-[3-(1,3,2-dioxaborolan-2-yloxy)propyl]methaniminium; Guanidine-3-propanol; [4-(1,3,2-Dioxaborolan-2-Yloxy)Methyl]Benzamidine; 1,3,2-Dioxaborolan-2-Ol	(M3468)NABA ECM REGULATORS; (M5885)NABA MATRISOME ASSOCIATED; (M5889)NABA MATRISOME	(M5921)HALLMARK COMPLEMENT	0.0	0.0	0.0	0.0	0.0	0.0	0.0	0.0	0.0	0.0	0.0	0.0	1.0	0.0	0.0	0.0	0.0	1.0	0.0	0.0
FOXP1	27086	symbol	H. sapiens	27086	H. sapiens	FOXP1	forkhead box P1	GO:0032745 positive regulation of interleukin-21 production;GO:0061470 T follicular helper cell differentiation;GO:1901509 regulation of endothelial tube morphogenesis		Transcription factors:Helix-turn-helix domains; Predicted intracellular proteins; Cancer-related genes; Disease related genes	Nucleoplasm (Supported)				1.0	0.0	0.0	0.0	0.0	0.0	0.0	0.0	0.0	0.0	0.0	0.0	0.0	0.0	1.0	0.0	1.0	0.0	0.0	0.0
SELPLG	6404	symbol	H. sapiens	6404	H. sapiens	SELPLG	selectin P ligand	GO:0050902 leukocyte adhesive activation;GO:0050901 leukocyte tethering or rolling;GO:0061756 leukocyte adhesion to vascular endothelial cell		Candidate cardiovascular disease genes; CD markers	Vesicles (Approved)		(M159)PID AMB2 NEUTROPHILS PATHWAY		1.0	0.0	1.0	0.0	0.0	0.0	0.0	0.0	0.0	0.0	0.0	0.0	0.0	0.0	1.0	0.0	0.0	0.0	0.0	0.0
SNORD89	692205	symbol	H. sapiens	692205	H. sapiens	SNORD89	small nucleolar RNA, C/D box 89	GO:0006396 RNA processing;GO:0016070 RNA metabolic process;GO:0010467 gene expression							0.0	0.0	0.0	0.0	0.0	0.0	0.0	0.0	0.0	0.0	0.0	0.0	0.0	0.0	0.0	0.0	0.0	0.0	0.0	0.0
SNORA21	619505	symbol	H. sapiens	619505	H. sapiens	SNORA21	small nucleolar RNA, H/ACA box 21	GO:0006396 RNA processing;GO:0016070 RNA metabolic process;GO:0010467 gene expression							0.0	0.0	0.0	0.0	0.0	0.0	0.0	0.0	0.0	0.0	0.0	0.0	0.0	0.0	0.0	0.0	0.0	0.0	0.0	0.0
SNORA45A	619562	gene_synonym	H. sapiens	619562	H. sapiens	SNORA3A	small nucleolar RNA, H/ACA box 3A	GO:0006396 RNA processing;GO:0016070 RNA metabolic process;GO:0010467 gene expression							0.0	0.0	0.0	0.0	0.0	0.0	0.0	0.0	0.0	0.0	0.0	0.0	0.0	0.0	0.0	0.0	0.0	0.0	0.0	0.0
SNORA76C	677842	gene_synonym	H. sapiens	677842	H. sapiens	SNORA50C	small nucleolar RNA, H/ACA box 50C	GO:0006396 RNA processing;GO:0016070 RNA metabolic process;GO:0010467 gene expression							0.0	0.0	0.0	0.0	0.0	0.0	0.0	0.0	0.0	0.0	0.0	0.0	0.0	0.0	0.0	0.0	0.0	0.0	0.0	0.0
FAXC	84553	symbol	H. sapiens	84553	H. sapiens	FAXC	failed axon connections homolog, metaxin like GST domain containing			Predicted intracellular proteins	Nucleoplasm (Approved)				0.0	0.0	0.0	0.0	0.0	0.0	0.0	0.0	0.0	0.0	0.0	0.0	0.0	0.0	0.0	0.0	0.0	0.0	0.0	0.0
MOGS	7841	symbol	H. sapiens	7841	H. sapiens	MOGS	mannosyl-oligosaccharide glucosidase	GO:0019082 viral protein processing;GO:0019080 viral gene expression;GO:0009311 oligosaccharide metabolic process		ENZYME proteins:Hydrolases; Disease related genes; Potential drug targets; Enzymes; Predicted intracellular proteins; Human disease related genes:Congenital disorders of metabolism:Congenital disorders of glycan/glycoprotein metabolism	Endoplasmic reticulum (Supported)				0.0	0.0	0.0	0.0	0.0	0.0	0.0	0.0	0.0	0.0	0.0	0.0	0.0	0.0	0.0	0.0	0.0	0.0	0.0	0.0
PDE4D	5144	symbol	H. sapiens	5144	H. sapiens	PDE4D	phosphodiesterase 4D	GO:0086024 adenylate cyclase-activating adrenergic receptor signaling pathway involved in positive regulation of heart rate;GO:1901898 negative regulation of relaxation of cardiac muscle;GO:0140200 adenylate cyclase-activating adrenergic receptor signaling pathway involved in regulation of heart rate		FDA approved drug targets:Small molecule drugs; ENZYME proteins:Hydrolases; Human disease related genes:Congenital malformations:Congenital malformations of the musculoskeletal system; Disease related genes; Enzymes; Predicted intracellular proteins	Plasma membrane (Supported); Additional: Cytosol	Adenosine phosphate; Dyphylline; Iloprost; Roflumilast; Piclamilast; Rolipram; 3,5-Dimethyl-1-(3-Nitrophenyl)-1h-Pyrazole-4-Carboxylic Acid Ethyl Ester; 2-[3-(2-Hydroxy-1,1-Dihydroxymethyl-Ethylamino)-Propylamino]-2-Hydroxymethyl-Propane-1,3-Diol; Zardaverine; 1-(4-Aminophenyl)-3,5-Dimethyl-1h-Pyrazole-4-Carboxylic Acid Ethyl Ester; (S)-Rolipram; Cilomilast; (R)-Rolipram; 3,5-Dimethyl-1h-Pyrazole…			0.0	0.0	0.0	0.0	0.0	0.0	0.0	0.0	0.0	0.0	0.0	0.0	0.0	0.0	0.0	0.0	0.0	0.0	1.0	0.0
PMAIP1	5366	symbol	H. sapiens	5366	H. sapiens	PMAIP1	phorbol-12-myristate-13-acetate-induced protein 1	GO:1902237 positive regulation of endoplasmic reticulum stress-induced intrinsic apoptotic signaling pathway;GO:0010917 negative regulation of mitochondrial membrane potential;GO:0045837 negative regulation of membrane potential		Predicted intracellular proteins	Vesicles (Uncertain)		(M256)PID TAP63 PATHWAY; (M66)PID MYC ACTIV PATHWAY; (M145)PID P53 DOWNSTREAM PATHWAY	(M5902)HALLMARK APOPTOSIS; (M5906)HALLMARK ESTROGEN RESPONSE EARLY	1.0	0.0	0.0	0.0	1.0	1.0	0.0	0.0	0.0	0.0	0.0	0.0	0.0	0.0	0.0	0.0	0.0	0.0	0.0	0.0
NKD2	85409	symbol	H. sapiens	85409	H. sapiens	NKD2	NKD inhibitor of WNT signaling pathway 2	GO:0048210 Golgi vesicle fusion to target membrane;GO:0010954 positive regulation of protein processing;GO:1903319 positive regulation of protein maturation		Predicted intracellular proteins			(M90)PID WNT CANONICAL PATHWAY		0.0	0.0	0.0	0.0	0.0	0.0	0.0	0.0	0.0	1.0	0.0	0.0	0.0	0.0	0.0	0.0	0.0	0.0	0.0	0.0
FJX1	24147	symbol	H. sapiens	24147	H. sapiens	FJX1	four-jointed box kinase 1	GO:0010842 retina layer formation;GO:0060042 retina morphogenesis in camera-type eye;GO:0003407 neural retina development		Predicted intracellular proteins	Vesicles (Approved)			(M5890)HALLMARK TNFA SIGNALING VIA NFKB	0.0	0.0	0.0	0.0	0.0	0.0	0.0	0.0	0.0	0.0	0.0	0.0	0.0	0.0	0.0	0.0	0.0	0.0	0.0	0.0
BEND3	57673	symbol	H. sapiens	57673	H. sapiens	BEND3	BEN domain containing 3	GO:0036124 histone H3-K9 trimethylation;GO:0098532 histone H3-K27 trimethylation;GO:0000183 rDNA heterochromatin assembly		Predicted intracellular proteins	Nucleoplasm (Approved)				1.0	0.0	1.0	0.0	1.0	0.0	0.0	0.0	0.0	0.0	0.0	0.0	0.0	0.0	0.0	0.0	0.0	0.0	0.0	0.0
RFXANK	8625	symbol	H. sapiens	8625	H. sapiens	RFXANK	regulatory factor X associated ankyrin containing protein	GO:0007265 Ras protein signal transduction;GO:0007264 small GTPase mediated signal transduction;GO:0045944 positive regulation of transcription by RNA polymerase II		Human disease related genes:Immune system diseases:Primary immunodeficiency; Predicted intracellular proteins; Transcription factors:Yet undefined DNA-binding domains; Disease related genes	Nucleoplasm (Enhanced)		(M30)PID HDAC CLASSII PATHWAY		0.0	0.0	0.0	0.0	0.0	0.0	0.0	0.0	0.0	0.0	0.0	0.0	0.0	0.0	0.0	0.0	0.0	0.0	0.0	0.0
TBX2-AS1	103689912	symbol	H. sapiens	103689912	H. sapiens	TBX2-AS1	TBX2 antisense RNA 1								0.0	0.0	0.0	0.0	0.0	0.0	0.0	0.0	0.0	0.0	0.0	0.0	0.0	0.0	0.0	0.0	0.0	0.0	0.0	0.0
TMC6	11322	symbol	H. sapiens	11322	H. sapiens	TMC6	transmembrane channel like 6	GO:0034220 ion transmembrane transport;GO:0055085 transmembrane transport;GO:0006811 ion transport		Human disease related genes:Skin diseases:Skin and soft tissue diseases; Disease related genes; Potential drug targets; Transporters:Transporter channels and pores; Predicted intracellular proteins					0.0	0.0	0.0	0.0	0.0	0.0	0.0	0.0	0.0	0.0	0.0	0.0	0.0	0.0	0.0	0.0	0.0	0.0	0.0	0.0
TMEM261	90871	gene_synonym	H. sapiens	90871	H. sapiens	DMAC1	distal membrane arm assembly component 1	GO:0010257 NADH dehydrogenase complex assembly;GO:0032981 mitochondrial respiratory chain complex I assembly;GO:0033108 mitochondrial respiratory chain complex assembly							0.0	0.0	0.0	0.0	0.0	0.0	0.0	0.0	0.0	0.0	0.0	0.0	0.0	0.0	0.0	0.0	0.0	0.0	0.0	0.0
KCNMA1	3778	symbol	H. sapiens	3778	H. sapiens	KCNMA1	potassium calcium-activated channel subfamily M alpha 1	GO:0060083 smooth muscle contraction involved in micturition;GO:0034465 response to carbon monoxide;GO:0045794 negative regulation of cell volume		Voltage-gated ion channels:Calcium-Activated Potassium Channels; Human disease related genes:Nervous system diseases:Epilepsy; FDA approved drug targets:Small molecule drugs; Disease related genes; Transporters:Transporter channels and pores; Predicted intracellular proteins		Chlorzoxazone; Bendroflumethiazide; Procaine; Hydroflumethiazide; Hydrochlorothiazide; Miconazole; Diazoxide; Halothane; Dequalinium; Trimebutine		(M5942)HALLMARK UV RESPONSE DN	0.0	0.0	1.0	0.0	0.0	0.0	0.0	0.0	0.0	0.0	0.0	0.0	0.0	0.0	0.0	0.0	0.0	0.0	1.0	1.0
ADAMTS7	11173	symbol	H. sapiens	11173	H. sapiens	ADAMTS7	ADAM metallopeptidase with thrombospondin type 1 motif 7	GO:0043931 ossification involved in bone maturation;GO:0070977 bone maturation;GO:0032331 negative regulation of chondrocyte differentiation		Predicted secreted proteins	Vesicles (Supported)		(M3468)NABA ECM REGULATORS; (M5885)NABA MATRISOME ASSOCIATED; (M5889)NABA MATRISOME		1.0	0.0	0.0	0.0	0.0	0.0	0.0	0.0	0.0	0.0	0.0	1.0	0.0	0.0	0.0	0.0	0.0	0.0	0.0	0.0
IRGQ	126298	symbol	H. sapiens	126298	H. sapiens	IRGQ	immunity related GTPase Q			Predicted intracellular proteins	Vesicles (Approved)				0.0	0.0	0.0	0.0	0.0	0.0	0.0	0.0	0.0	0.0	0.0	0.0	0.0	0.0	0.0	0.0	0.0	0.0	0.0	0.0
SCNM1	79005	symbol	H. sapiens	79005	H. sapiens	SCNM1	sodium channel modifier 1	GO:0000380 alternative mRNA splicing, via spliceosome;GO:0000377 RNA splicing, via transesterification reactions with bulged adenosine as nucleophile;GO:0000398 mRNA splicing, via spliceosome		Predicted intracellular proteins	Nucleoplasm (Approved)				0.0	0.0	0.0	0.0	0.0	0.0	0.0	0.0	0.0	0.0	0.0	0.0	0.0	0.0	0.0	0.0	0.0	0.0	0.0	0.0
HNRNPH2	3188	symbol	H. sapiens	3188	H. sapiens	HNRNPH2	heterogeneous nuclear ribonucleoprotein H2	GO:0043484 regulation of RNA splicing;GO:0051252 regulation of RNA metabolic process;GO:0019219 regulation of nucleobase-containing compound metabolic process		Predicted intracellular proteins; Human disease related genes:Other diseases:Mental and behavioural disorders; Disease related genes	Nucleoplasm (Enhanced)				0.0	0.0	0.0	0.0	0.0	0.0	0.0	0.0	0.0	0.0	0.0	0.0	0.0	0.0	0.0	0.0	0.0	0.0	0.0	0.0
LINC00273	649159	symbol	H. sapiens	649159	H. sapiens	LINC00273	long intergenic non-protein coding RNA 273								0.0	0.0	0.0	0.0	0.0	0.0	0.0	0.0	0.0	0.0	0.0	0.0	0.0	0.0	0.0	0.0	0.0	0.0	0.0	0.0
RPS23	6228	symbol	H. sapiens	6228	H. sapiens	RPS23	ribosomal protein S23	GO:1990145 maintenance of translational fidelity;GO:0034063 stress granule assembly;GO:0002181 cytoplasmic translation		Ribosomal proteins; Predicted intracellular proteins; Disease related genes	Cytosol;Endoplasmic reticulum (Enhanced)				1.0	0.0	0.0	0.0	0.0	0.0	0.0	1.0	0.0	0.0	0.0	0.0	0.0	0.0	0.0	0.0	0.0	0.0	0.0	0.0
FOXS1	2307	symbol	H. sapiens	2307	H. sapiens	FOXS1	forkhead box S1	GO:0040018 positive regulation of multicellular organism growth;GO:0050885 neuromuscular process controlling balance;GO:0040014 regulation of multicellular organism growth		Transcription factors:Helix-turn-helix domains; Predicted intracellular proteins	Cytosol;Nucleoplasm (Approved)				0.0	0.0	0.0	0.0	0.0	0.0	0.0	0.0	0.0	0.0	0.0	0.0	0.0	0.0	0.0	0.0	0.0	1.0	0.0	1.0
SFXN2	118980	symbol	H. sapiens	118980	H. sapiens	SFXN2	sideroflexin 2	GO:0140300 serine import into mitochondrion;GO:0032329 serine transport;GO:0043090 amino acid import		Transporters:Electrochemical Potential-driven transporters; Predicted intracellular proteins	Mitochondria (Approved)				0.0	0.0	0.0	0.0	0.0	0.0	0.0	0.0	0.0	0.0	0.0	0.0	0.0	0.0	0.0	0.0	0.0	0.0	0.0	0.0
SNORA22	677807	symbol	H. sapiens	677807	H. sapiens	SNORA22	small nucleolar RNA, H/ACA box 22	GO:0006396 RNA processing;GO:0016070 RNA metabolic process;GO:0010467 gene expression							0.0	0.0	0.0	0.0	0.0	0.0	0.0	0.0	0.0	0.0	0.0	0.0	0.0	0.0	0.0	0.0	0.0	0.0	0.0	0.0
RTKN2	219790	symbol	H. sapiens	219790	H. sapiens	RTKN2	rhotekin 2	GO:1901224 positive regulation of NIK/NF-kappaB signaling;GO:2001243 negative regulation of intrinsic apoptotic signaling pathway;GO:1901222 regulation of NIK/NF-kappaB signaling		Predicted intracellular proteins	Nucleoplasm (Approved); Additional: Mitochondria				0.0	0.0	0.0	0.0	0.0	0.0	0.0	0.0	0.0	0.0	0.0	0.0	0.0	0.0	1.0	0.0	0.0	0.0	0.0	0.0
LINC00473	90632	symbol	H. sapiens	90632	H. sapiens	LINC00473	long intergenic non-protein coding RNA 473	GO:0006351 transcription, DNA-templated;GO:0097659 nucleic acid-templated transcription;GO:0032774 RNA biosynthetic process							1.0	0.0	0.0	0.0	0.0	0.0	0.0	0.0	0.0	0.0	0.0	0.0	0.0	0.0	0.0	0.0	0.0	0.0	0.0	0.0
PDXK	8566	symbol	H. sapiens	8566	H. sapiens	PDXK	pyridoxal kinase	GO:0009443 pyridoxal 5'-phosphate salvage;GO:0042823 pyridoxal phosphate biosynthetic process;GO:0042819 vitamin B6 biosynthetic process		FDA approved drug targets:Small molecule drugs; Disease related genes; Enzymes; Predicted intracellular proteins; ENZYME proteins:Transferases	Nucleoplasm (Enhanced)	Pyridoxal; Pyridoxine; Adenosine-5'-[Beta, Gamma-Methylene]Triphosphate; O6-(R)-ROSCOVITINE, R-2-(6-BENZYLOXY-9-ISOPROPYL-9H-PURIN-2-YLAMINO)-BUTAN-1-OL; (2R)-2-({6-[benzyl(methyl)amino]-9-isopropyl-9H-purin-2-yl}amino)butan-1-ol			1.0	0.0	0.0	0.0	0.0	0.0	0.0	0.0	0.0	0.0	0.0	0.0	0.0	0.0	0.0	0.0	0.0	0.0	0.0	0.0
RASGRF2	5924	symbol	H. sapiens	5924	H. sapiens	RASGRF2	Ras protein specific guanine nucleotide releasing factor 2	GO:2000310 regulation of NMDA receptor activity;GO:0060291 long-term synaptic potentiation;GO:0099601 regulation of neurotransmitter receptor activity		RAS pathway related proteins; Predicted intracellular proteins	Endoplasmic reticulum (Supported)		(M269)PID RAS PATHWAY; (M241)PID RAC1 REG PATHWAY		1.0	0.0	0.0	0.0	0.0	0.0	0.0	0.0	0.0	0.0	0.0	0.0	0.0	1.0	0.0	1.0	0.0	0.0	1.0	0.0
SRA1	10011	symbol	H. sapiens	10011	H. sapiens	SRA1	steroid receptor RNA activator 1	GO:0071391 cellular response to estrogen stimulus;GO:0045662 negative regulation of myoblast differentiation;GO:0045661 regulation of myoblast differentiation		Predicted intracellular proteins	Nucleoplasm (Supported); Additional: Cytokinetic bridge;Cytosol;Microtubules		(M200)PID ERA GENOMIC PATHWAY		1.0	0.0	0.0	0.0	0.0	0.0	0.0	0.0	0.0	0.0	0.0	0.0	0.0	0.0	0.0	0.0	0.0	0.0	0.0	0.0
HMGA2	8091	symbol	H. sapiens	8091	H. sapiens	HMGA2	high mobility group AT-hook 2	GO:0003131 mesodermal-endodermal cell signaling;GO:2000685 positive regulation of cellular response to X-ray;GO:2000683 regulation of cellular response to X-ray		Transcription factors:beta-Sheet binding to DNA; Human disease related genes:Reproductive system diseases:Reproductive system diseases; Cancer-related genes:Candidate cancer biomarkers; Disease related genes; Predicted intracellular proteins	Nucleoli;Nucleoli rim;Nucleoplasm (Supported)				1.0	0.0	1.0	0.0	1.0	0.0	0.0	0.0	0.0	0.0	0.0	0.0	0.0	0.0	0.0	1.0	0.0	0.0	0.0	1.0
TIMM44	10469	symbol	H. sapiens	10469	H. sapiens	TIMM44	translocase of inner mitochondrial membrane 44	GO:0030150 protein import into mitochondrial matrix;GO:0044743 protein transmembrane import into intracellular organelle;GO:0065002 intracellular protein transmembrane transport		Predicted intracellular proteins	Mitochondria (Enhanced)				0.0	0.0	0.0	0.0	0.0	0.0	0.0	0.0	0.0	0.0	0.0	0.0	0.0	0.0	0.0	0.0	0.0	0.0	0.0	0.0
IRS1	3667	symbol	H. sapiens	3667	H. sapiens	IRS1	insulin receptor substrate 1	GO:0032000 positive regulation of fatty acid beta-oxidation;GO:0048009 insulin-like growth factor receptor signaling pathway;GO:0045725 positive regulation of glycogen biosynthetic process		Predicted intracellular proteins; Disease related genes	Cytosol;Nucleoplasm (Supported); Additional: Plasma membrane	[4-({5-(AMINOCARBONYL)-4-[(3-METHYLPHENYL)AMINO]PYRIMIDIN-2-YL}AMINO)PHENYL]ACETIC ACID	(M268)PID S1P S1P2 PATHWAY; (M1718)SIG IL4RECEPTOR IN B LYPHOCYTES; (M125)PID IGF1 PATHWAY	(M5942)HALLMARK UV RESPONSE DN; (M5915)HALLMARK APICAL JUNCTION	0.0	0.0	1.0	0.0	0.0	0.0	0.0	0.0	1.0	0.0	1.0	0.0	0.0	0.0	0.0	1.0	0.0	0.0	1.0	0.0
NID2	22795	symbol	H. sapiens	22795	H. sapiens	NID2	nidogen 2	GO:0071711 basement membrane organization;GO:0007160 cell-matrix adhesion;GO:0031589 cell-substrate adhesion		Predicted secreted proteins; Predicted intracellular proteins	Plasma membrane (Enhanced)		(M5887)NABA BASEMENT MEMBRANES; (M3008)NABA ECM GLYCOPROTEINS; (M5884)NABA CORE MATRISOME	(M5930)HALLMARK EPITHELIAL MESENCHYMAL TRANSITION	0.0	0.0	0.0	0.0	0.0	0.0	0.0	0.0	0.0	0.0	0.0	0.0	1.0	0.0	0.0	0.0	0.0	0.0	0.0	0.0
OLFM2	93145	symbol	H. sapiens	93145	H. sapiens	OLFM2	olfactomedin 2	GO:1905174 regulation of vascular associated smooth muscle cell dedifferentiation;GO:0051152 positive regulation of smooth muscle cell differentiation;GO:0051150 regulation of smooth muscle cell differentiation		Predicted secreted proteins; Predicted intracellular proteins	Nucleoplasm (Approved)				0.0	0.0	0.0	0.0	0.0	0.0	0.0	0.0	0.0	0.0	0.0	0.0	0.0	0.0	0.0	0.0	0.0	0.0	0.0	0.0
SNORD32A	26819	symbol	H. sapiens	26819	H. sapiens	SNORD32A	small nucleolar RNA, C/D box 32A	GO:0006396 RNA processing;GO:0016070 RNA metabolic process;GO:0010467 gene expression							0.0	0.0	0.0	0.0	0.0	0.0	0.0	0.0	0.0	0.0	0.0	0.0	0.0	0.0	0.0	0.0	0.0	0.0	0.0	0.0
EDN2	1907	symbol	H. sapiens	1907	H. sapiens	EDN2	endothelin 2	GO:0003058 hormonal regulation of the force of heart contraction;GO:0009932 cell tip growth;GO:0003099 positive regulation of the force of heart contraction by chemical signal		Predicted secreted proteins	Cytosol (Approved)		(M8)PID ENDOTHELIN PATHWAY; (M145)PID P53 DOWNSTREAM PATHWAY	(M5891)HALLMARK HYPOXIA; (M5956)HALLMARK KRAS SIGNALING DN	0.0	0.0	0.0	0.0	0.0	0.0	1.0	0.0	0.0	0.0	0.0	1.0	0.0	0.0	1.0	0.0	0.0	1.0	0.0	1.0
UQCRH	7388	symbol	H. sapiens	7388	H. sapiens	UQCRH	ubiquinol-cytochrome c reductase hinge protein	GO:0006122 mitochondrial electron transport, ubiquinol to cytochrome c;GO:0019646 aerobic electron transport chain;GO:0042773 ATP synthesis coupled electron transport		Predicted intracellular proteins		2-Hexyloxy-6-Hydroxymethyl-Tetrahydro-Pyran-3,4,5-Triol; 6-Hydroxy-5-undecyl-4,7-benzothiazoledione; Azoxystrobin; (5S)-3-ANILINO-5-(2,4-DIFLUOROPHENYL)-5-METHYL-1,3-OXAZOLIDINE-2,4-DIONE; (S)-famoxadone; METHYL (2Z)-3-METHOXY-2-{2-[(E)-2-PHENYLVINYL]PHENYL}ACRYLATE; 2-Nonyl-4-quinolinol 1-oxide; Ubiquinone Q2		(M5936)HALLMARK OXIDATIVE PHOSPHORYLATION	0.0	0.0	0.0	0.0	0.0	0.0	0.0	0.0	0.0	0.0	0.0	0.0	0.0	0.0	0.0	0.0	0.0	0.0	0.0	0.0
AS3MT	57412	symbol	H. sapiens	57412	H. sapiens	AS3MT	arsenite methyltransferase	GO:0018872 arsonoacetate metabolic process;GO:0009404 toxin metabolic process;GO:0019748 secondary metabolic process		Enzymes; Predicted intracellular proteins; ENZYME proteins:Transferases	Mitochondria (Approved)	Ademetionine			0.0	0.0	0.0	0.0	0.0	0.0	0.0	0.0	0.0	0.0	0.0	0.0	0.0	0.0	0.0	0.0	0.0	0.0	0.0	0.0
RHOB	388	symbol	H. sapiens	388	H. sapiens	RHOB	ras homolog family member B	GO:0003159 morphogenesis of an endothelium;GO:0061154 endothelial tube morphogenesis;GO:0030865 cortical cytoskeleton organization		Predicted intracellular proteins; Cancer-related genes:Candidate cancer biomarkers		Botulinum toxin type A	(M153)PID P75 NTR PATHWAY; (M124)PID CXCR4 PATHWAY	(M5941)HALLMARK UV RESPONSE UP; (M5902)HALLMARK APOPTOSIS; (M5947)HALLMARK IL2 STAT5 SIGNALING	1.0	0.0	1.0	0.0	0.0	0.0	0.0	1.0	0.0	0.0	0.0	0.0	0.0	0.0	0.0	0.0	0.0	1.0	0.0	0.0
SNRPD2	6633	symbol	H. sapiens	6633	H. sapiens	SNRPD2	small nuclear ribonucleoprotein D2 polypeptide	GO:0000387 spliceosomal snRNP assembly;GO:0000245 spliceosomal complex assembly;GO:0022618 ribonucleoprotein complex assembly		Predicted intracellular proteins	Cytosol (Supported)	Artenimol		(M5926)HALLMARK MYC TARGETS V1	0.0	0.0	0.0	0.0	0.0	0.0	0.0	0.0	0.0	0.0	0.0	0.0	0.0	0.0	0.0	0.0	0.0	0.0	0.0	0.0
DFFA	1676	symbol	H. sapiens	1676	H. sapiens	DFFA	DNA fragmentation factor subunit alpha	GO:0032076 negative regulation of deoxyribonuclease activity;GO:1902511 negative regulation of apoptotic DNA fragmentation;GO:1903625 negative regulation of DNA catabolic process		Predicted intracellular proteins	Cytosol;Plasma membrane (Supported)		(M7997)SA CASPASE CASCADE; (M197)PID HIV NEF PATHWAY; (M220)PID CASPASE PATHWAY	(M5902)HALLMARK APOPTOSIS	0.0	0.0	0.0	0.0	1.0	0.0	0.0	0.0	0.0	0.0	0.0	0.0	0.0	0.0	0.0	0.0	0.0	0.0	0.0	0.0
L3HYPDH	112849	symbol	H. sapiens	112849	H. sapiens	L3HYPDH	trans-L-3-hydroxyproline dehydratase			Enzymes; ENZYME proteins:Lyases; Predicted intracellular proteins	Vesicles (Uncertain)	Proline			0.0	0.0	0.0	0.0	0.0	0.0	0.0	0.0	0.0	0.0	0.0	0.0	0.0	0.0	0.0	0.0	0.0	0.0	0.0	0.0
PCGF3	10336	symbol	H. sapiens	10336	H. sapiens	PCGF3	polycomb group ring finger 3	GO:0060819 inactivation of X chromosome by genetic imprinting;GO:0036353 histone H2A-K119 monoubiquitination;GO:0006349 regulation of gene expression by genetic imprinting		Predicted intracellular proteins	Nucleoplasm (Supported)				1.0	0.0	1.0	0.0	0.0	0.0	0.0	0.0	0.0	0.0	0.0	0.0	0.0	0.0	0.0	0.0	0.0	0.0	0.0	0.0
XYLT1	64131	symbol	H. sapiens	64131	H. sapiens	XYLT1	xylosyltransferase 1	GO:0030206 chondroitin sulfate biosynthetic process;GO:0043931 ossification involved in bone maturation;GO:0070977 bone maturation		Predicted secreted proteins; Human disease related genes:Congenital malformations:Congenital malformations of skin; Human disease related genes:Congenital malformations:Congenital malformations of the musculoskeletal system; Disease related genes; Potential drug targets; Enzymes; ENZYME proteins:Transferases	Plasma membrane (Approved); Additional: Endoplasmic reticulum				0.0	0.0	0.0	0.0	0.0	0.0	0.0	0.0	0.0	0.0	0.0	1.0	0.0	0.0	0.0	0.0	0.0	0.0	0.0	0.0
TALDO1	6888	symbol	H. sapiens	6888	H. sapiens	TALDO1	transaldolase 1	GO:0019682 glyceraldehyde-3-phosphate metabolic process;GO:0009052 pentose-phosphate shunt, non-oxidative branch;GO:0006002 fructose 6-phosphate metabolic process		Human disease related genes:Congenital disorders of metabolism:Congenital disorders of lipid/glycolipid metabolism; Disease related genes; Potential drug targets; Enzymes; Predicted intracellular proteins; ENZYME proteins:Transferases	Nucleoplasm (Approved); Additional: Cytosol			(M5951)HALLMARK SPERMATOGENESIS; (M5905)HALLMARK ADIPOGENESIS; (M5937)HALLMARK GLYCOLYSIS	0.0	0.0	1.0	0.0	0.0	0.0	0.0	0.0	0.0	0.0	0.0	0.0	0.0	0.0	0.0	0.0	0.0	0.0	0.0	0.0
LAGE3	8270	symbol	H. sapiens	8270	H. sapiens	LAGE3	L antigen family member 3	GO:0070525 tRNA threonylcarbamoyladenosine metabolic process;GO:0008033 tRNA processing;GO:0006399 tRNA metabolic process		Human disease related genes:Congenital malformations:Congenital malformations of the nervous system; Predicted intracellular proteins; Disease related genes	Nucleoplasm (Supported); Additional: Nuclear bodies				0.0	0.0	0.0	0.0	0.0	0.0	0.0	0.0	0.0	0.0	0.0	0.0	0.0	0.0	0.0	0.0	0.0	0.0	0.0	0.0
C6orf223	221416	symbol	H. sapiens	221416	H. sapiens	C6orf223	chromosome 6 open reading frame 223								0.0	0.0	0.0	0.0	0.0	0.0	0.0	0.0	0.0	0.0	0.0	0.0	0.0	0.0	0.0	0.0	0.0	0.0	0.0	0.0
ASH1L-AS1	645676	symbol	H. sapiens	645676	H. sapiens	ASH1L-AS1	ASH1L antisense RNA 1								0.0	0.0	0.0	0.0	0.0	0.0	0.0	0.0	0.0	0.0	0.0	0.0	0.0	0.0	0.0	0.0	0.0	0.0	0.0	0.0
NSUN5P1	155400	symbol	H. sapiens	155400	H. sapiens	NSUN5P1	NSUN5 pseudogene 1	GO:0070475 rRNA base methylation;GO:0031167 rRNA methylation;GO:0000154 rRNA modification							0.0	0.0	0.0	0.0	0.0	0.0	0.0	0.0	0.0	0.0	0.0	0.0	0.0	0.0	0.0	0.0	0.0	0.0	0.0	0.0
NUAK2	81788	symbol	H. sapiens	81788	H. sapiens	NUAK2	NUAK family kinase 2	GO:0042149 cellular response to glucose starvation;GO:0009267 cellular response to starvation;GO:0042594 response to starvation	CAMK Ser/Thr protein kinase family	Enzymes; Kinases:CAMK Ser/Thr protein kinases; ENZYME proteins:Transferases	Cytosol;Nucleoplasm (Approved)	Fostamatinib			0.0	0.0	0.0	0.0	0.0	0.0	0.0	0.0	0.0	0.0	0.0	0.0	0.0	0.0	0.0	0.0	0.0	0.0	0.0	0.0
RNF216	54476	symbol	H. sapiens	54476	H. sapiens	RNF216	ring finger protein 216	GO:0032480 negative regulation of type I interferon production;GO:0050691 regulation of defense response to virus by host;GO:0032648 regulation of interferon-beta production		Predicted intracellular proteins; Disease related genes; Potential drug targets; Enzymes; Human disease related genes:Nervous system diseases:Neurodegenerative diseases; ENZYME proteins:Transferases	Cytosol (Supported); Additional: Nucleoplasm				0.0	0.0	0.0	0.0	0.0	0.0	0.0	0.0	0.0	0.0	0.0	0.0	0.0	0.0	0.0	0.0	0.0	0.0	0.0	0.0
THRIL	102659353	symbol	H. sapiens	102659353	H. sapiens	THRIL	TNF and HNRNPL related immunoregulatory long non-coding RNA								0.0	0.0	0.0	0.0	0.0	0.0	0.0	0.0	0.0	0.0	0.0	0.0	0.0	0.0	0.0	0.0	0.0	0.0	0.0	0.0
FAM212B-AS1	100506343	gene_synonym	H. sapiens	100506343	H. sapiens	INKA2-AS1	INKA2 antisense RNA 1								0.0	0.0	0.0	0.0	0.0	0.0	0.0	0.0	0.0	0.0	0.0	0.0	0.0	0.0	0.0	0.0	0.0	0.0	0.0	0.0
SCN5A	6331	symbol	H. sapiens	6331	H. sapiens	SCN5A	sodium voltage-gated channel alpha subunit 5	GO:0098912 membrane depolarization during atrial cardiac muscle cell action potential;GO:0086048 membrane depolarization during bundle of His cell action potential;GO:0086017 Purkinje myocyte action potential		FDA approved drug targets:Small molecule drugs; Predicted intracellular proteins; Voltage-gated ion channels:Voltage-Gated Sodium Channels; Disease related genes; Transporters:Transporter channels and pores; Human disease related genes:Cardiovascular diseases:Cardiac diseases	Plasma membrane (Supported); Additional: Nucleoli;Nucleoplasm	Indecainide; Phenytoin; Disopyramide; Lidocaine; Mexiletine; Hexylcaine; Cinchocaine; Mephenytoin; Moricizine; Riluzole; Prilocaine; Ethotoin; Benzonatate; Quinidine; Zonisamide; Procainamide; Tocainide; Propafenone; Flecainide; Encainide; Fosphenytoin; Quinidine barbiturate; Ajmaline; Aprindine; Dronedarone; Vernakalant; Isavuconazole			0.0	0.0	0.0	0.0	0.0	0.0	0.0	1.0	0.0	0.0	0.0	0.0	0.0	0.0	0.0	0.0	1.0	0.0	1.0	0.0
CD302	9936	symbol	H. sapiens	9936	H. sapiens	CD302	CD302 molecule	GO:0006909 phagocytosis;GO:0016192 vesicle-mediated transport;GO:0006810 transport		CD markers				(M5905)HALLMARK ADIPOGENESIS	0.0	0.0	0.0	0.0	0.0	0.0	0.0	0.0	0.0	0.0	0.0	0.0	0.0	0.0	0.0	0.0	0.0	0.0	0.0	0.0
RAP1GAP2	23108	symbol	H. sapiens	23108	H. sapiens	RAP1GAP2	RAP1 GTPase activating protein 2	GO:0090630 activation of GTPase activity;GO:0008361 regulation of cell size;GO:0043547 positive regulation of GTPase activity		Predicted intracellular proteins	Cytosol;Nuclear membrane (Supported)				0.0	0.0	0.0	0.0	0.0	0.0	0.0	0.0	0.0	0.0	0.0	0.0	0.0	1.0	0.0	0.0	0.0	0.0	0.0	1.0
SLC35F6	54978	symbol	H. sapiens	54978	H. sapiens	SLC35F6	solute carrier family 35 member F6	GO:1901029 negative regulation of mitochondrial outer membrane permeabilization involved in apoptotic signaling pathway;GO:1901028 regulation of mitochondrial outer membrane permeabilization involved in apoptotic signaling pathway;GO:0010823 negative regulation of mitochondrion organization		Transporters:Electrochemical Potential-driven transporters	Vesicles (Approved); Additional: Cytosol;Nucleoplasm				0.0	0.0	0.0	0.0	0.0	0.0	0.0	0.0	0.0	0.0	0.0	0.0	0.0	0.0	0.0	0.0	0.0	0.0	0.0	0.0
G6PD	2539	symbol	H. sapiens	2539	H. sapiens	G6PD	glucose-6-phosphate dehydrogenase	GO:0010732 regulation of protein glutathionylation;GO:0010734 negative regulation of protein glutathionylation;GO:0019322 pentose biosynthetic process		Human disease related genes:Immune system diseases:Primary immunodeficiency; ENZYME proteins:Oxidoreductases; Cancer-related genes:Candidate cancer biomarkers; Human disease related genes:Cardiovascular diseases:Hematologic diseases; Human disease related genes:Congenital disorders of metabolism:Congenital disorders of amino acid metabolism; Disease related genes; Potential drug targets; Enzymes;…	Cytosol (Enhanced); Additional: Centriolar satellite	Glycolic acid; Nicotinamide adenine dinucleotide phosphate; 16-Bromoepiandrosterone; Artenimol		(M5938)HALLMARK REACTIVE OXYGEN SPECIES PATHWAY; (M5924)HALLMARK MTORC1 SIGNALING; (M5937)HALLMARK GLYCOLYSIS	1.0	0.0	0.0	0.0	0.0	0.0	0.0	1.0	0.0	0.0	0.0	0.0	0.0	0.0	1.0	0.0	0.0	0.0	1.0	1.0
F2R	2149	symbol	H. sapiens	2149	H. sapiens	F2R	coagulation factor II thrombin receptor	GO:1900134 negative regulation of renin secretion into blood stream;GO:0007529 establishment of synaptic specificity at neuromuscular junction;GO:0099552 trans-synaptic signaling by lipid, modulating synaptic transmission		G-protein coupled receptors:GPCRs excl olfactory receptors; FDA approved drug targets:Small molecule drugs; Predicted intracellular proteins		Streptokinase; SR-123781A; Vorapaxar; Thrombin	(M238)PID THROMBIN PAR1 PATHWAY	(M5902)HALLMARK APOPTOSIS; (M5939)HALLMARK P53 PATHWAY; (M5950)HALLMARK ALLOGRAFT REJECTION	0.0	0.0	1.0	0.0	0.0	1.0	0.0	0.0	1.0	0.0	0.0	0.0	0.0	1.0	1.0	0.0	0.0	0.0	1.0	1.0
IRF7	3665	symbol	H. sapiens	3665	H. sapiens	IRF7	interferon regulatory factor 7	GO:0019043 establishment of viral latency;GO:0034127 regulation of MyD88-independent toll-like receptor signaling pathway;GO:0019042 viral latency		Transcription factors:Helix-turn-helix domains; Predicted intracellular proteins; Disease related genes	Nucleoplasm (Supported); Additional: Cytosol		(M2)PID SMAD2 3NUCLEAR PATHWAY	(M5911)HALLMARK INTERFERON ALPHA RESPONSE; (M5913)HALLMARK INTERFERON GAMMA RESPONSE; (M5921)HALLMARK COMPLEMENT	1.0	0.0	1.0	0.0	0.0	0.0	0.0	0.0	0.0	0.0	0.0	0.0	0.0	0.0	0.0	0.0	0.0	0.0	0.0	0.0
UBASH3B	84959	symbol	H. sapiens	84959	H. sapiens	UBASH3B	ubiquitin associated and SH3 domain containing B	GO:0090331 negative regulation of platelet aggregation;GO:0038063 collagen-activated tyrosine kinase receptor signaling pathway;GO:0034111 negative regulation of homotypic cell-cell adhesion		Enzymes; ENZYME proteins:Hydrolases; Predicted intracellular proteins	Cytosol (Approved); Additional: Nuclear bodies;Nucleoplasm				1.0	0.0	0.0	0.0	0.0	0.0	0.0	0.0	1.0	0.0	0.0	0.0	1.0	1.0	1.0	1.0	0.0	0.0	1.0	0.0
PIK3C2B	5287	symbol	H. sapiens	5287	H. sapiens	PIK3C2B	phosphatidylinositol-4-phosphate 3-kinase catalytic subunit type 2 beta	GO:0036092 phosphatidylinositol-3-phosphate biosynthetic process;GO:0014065 phosphatidylinositol 3-kinase signaling;GO:0046854 phosphatidylinositol phosphate biosynthetic process		Enzymes; Predicted intracellular proteins; ENZYME proteins:Transferases	Nucleoplasm (Approved); Additional: Cytosol	Fostamatinib	(M231)PID KIT PATHWAY		0.0	0.0	0.0	0.0	0.0	1.0	0.0	0.0	1.0	0.0	0.0	0.0	0.0	0.0	0.0	0.0	0.0	0.0	0.0	0.0
RPS20	6224	symbol	H. sapiens	6224	H. sapiens	RPS20	ribosomal protein S20	GO:1904667 negative regulation of ubiquitin protein ligase activity;GO:0051444 negative regulation of ubiquitin-protein transferase activity;GO:1904666 regulation of ubiquitin protein ligase activity		Ribosomal proteins; Predicted intracellular proteins	Cytosol;Endoplasmic reticulum (Supported)				1.0	0.0	0.0	0.0	0.0	0.0	0.0	1.0	0.0	0.0	0.0	0.0	0.0	0.0	0.0	0.0	0.0	0.0	0.0	0.0
RNU11	26824	symbol	H. sapiens	26824	H. sapiens	RNU11	RNA, U11 small nuclear	GO:0000395 mRNA 5'-splice site recognition;GO:0045292 mRNA cis splicing, via spliceosome;GO:0006376 mRNA splice site selection							0.0	0.0	0.0	0.0	0.0	0.0	0.0	0.0	0.0	0.0	0.0	0.0	0.0	0.0	0.0	0.0	0.0	0.0	0.0	0.0
SYDE2	84144	symbol	H. sapiens	84144	H. sapiens	SYDE2	synapse defective Rho GTPase homolog 2	GO:0090630 activation of GTPase activity;GO:0043547 positive regulation of GTPase activity;GO:0051056 regulation of small GTPase mediated signal transduction		Predicted intracellular proteins	Golgi apparatus;Nucleoli;Nucleoli rim (Approved)				1.0	0.0	0.0	0.0	0.0	0.0	0.0	0.0	0.0	0.0	0.0	0.0	0.0	1.0	0.0	0.0	0.0	0.0	0.0	0.0
SMG1P3	100271836	symbol	H. sapiens	100271836	H. sapiens	SMG1P3	SMG1 pseudogene 3								0.0	0.0	0.0	0.0	0.0	0.0	0.0	0.0	0.0	0.0	0.0	0.0	0.0	0.0	0.0	0.0	0.0	0.0	0.0	0.0
WDR25	79446	symbol	H. sapiens	79446	H. sapiens	WDR25	WD repeat domain 25			Predicted secreted proteins; Predicted intracellular proteins	Nucleoplasm (Approved)				0.0	0.0	0.0	0.0	0.0	0.0	0.0	0.0	0.0	0.0	0.0	0.0	0.0	0.0	0.0	0.0	0.0	0.0	0.0	0.0
KIAA1875	340390	gene_synonym	H. sapiens	340390	H. sapiens	WDR97	WD repeat domain 97			Predicted intracellular proteins					0.0	0.0	0.0	0.0	0.0	0.0	0.0	0.0	0.0	0.0	0.0	0.0	0.0	0.0	0.0	0.0	0.0	0.0	0.0	0.0
NDUFB9	4715	symbol	H. sapiens	4715	H. sapiens	NDUFB9	NADH:ubiquinone oxidoreductase subunit B9	GO:0006120 mitochondrial electron transport, NADH to ubiquinone;GO:0010257 NADH dehydrogenase complex assembly;GO:0032981 mitochondrial respiratory chain complex I assembly		Predicted intracellular proteins; Disease related genes; Human disease related genes:Congenital disorders of metabolism:Mitochondrial diseases	Mitochondria (Supported)	NADH			0.0	0.0	0.0	0.0	0.0	0.0	0.0	0.0	0.0	0.0	0.0	0.0	0.0	0.0	0.0	0.0	0.0	0.0	0.0	0.0
PPP1R3F	89801	symbol	H. sapiens	89801	H. sapiens	PPP1R3F	protein phosphatase 1 regulatory subunit 3F	GO:2000465 regulation of glycogen (starch) synthase activity;GO:0005979 regulation of glycogen biosynthetic process;GO:0010962 regulation of glucan biosynthetic process		Predicted intracellular proteins	Nucleoplasm;Vesicles (Approved)				0.0	0.0	0.0	0.0	0.0	0.0	0.0	0.0	0.0	0.0	0.0	0.0	0.0	0.0	0.0	0.0	0.0	0.0	0.0	0.0
FAHD2B	151313	symbol	H. sapiens	151313	H. sapiens	FAHD2B	fumarylacetoacetate hydrolase domain containing 2B			Predicted intracellular proteins					0.0	0.0	0.0	0.0	0.0	0.0	0.0	0.0	0.0	0.0	0.0	0.0	0.0	0.0	0.0	0.0	0.0	0.0	0.0	0.0
LAT	27040	symbol	H. sapiens	27040	H. sapiens	LAT	linker for activation of T cells	GO:0002279 mast cell activation involved in immune response;GO:0043303 mast cell degranulation;GO:0002448 mast cell mediated immunity		RAS pathway related proteins; Predicted intracellular proteins; Disease related genes	Plasma membrane (Supported); Additional: Golgi apparatus		(M190)PID TCR JNK PATHWAY; (M141)PID PI3KCI PATHWAY; (M50)PID PTP1B PATHWAY		0.0	0.0	1.0	0.0	0.0	0.0	0.0	0.0	0.0	0.0	0.0	0.0	0.0	0.0	1.0	1.0	0.0	0.0	0.0	0.0
HIST1H2AD	3013	gene_synonym	H. sapiens	3013	H. sapiens	H2AC7	H2A clustered histone 7	GO:0008150 biological_process		Predicted intracellular proteins	Nucleoplasm (Approved)				1.0	1.0	0.0	0.0	0.0	0.0	0.0	0.0	0.0	0.0	0.0	0.0	0.0	0.0	0.0	0.0	0.0	0.0	0.0	0.0
TUSC1	286319	symbol	H. sapiens	286319	H. sapiens	TUSC1	tumor suppressor candidate 1			Predicted intracellular proteins	Vesicles (Approved); Additional: Nucleoplasm				0.0	0.0	0.0	0.0	0.0	0.0	0.0	0.0	0.0	0.0	0.0	0.0	0.0	0.0	0.0	0.0	0.0	0.0	0.0	0.0
RAB11FIP4	84440	symbol	H. sapiens	84440	H. sapiens	RAB11FIP4	RAB11 family interacting protein 4	GO:0032456 endocytic recycling;GO:0032465 regulation of cytokinesis;GO:0098876 vesicle-mediated transport to the plasma membrane		Predicted intracellular proteins					0.0	0.0	0.0	0.0	0.0	0.0	0.0	0.0	0.0	0.0	0.0	0.0	0.0	0.0	0.0	0.0	0.0	0.0	0.0	0.0
NPAP1	23742	symbol	H. sapiens	23742	H. sapiens	NPAP1	nuclear pore associated protein 1	GO:0006405 RNA export from nucleus;GO:0006606 protein import into nucleus;GO:0051170 import into nucleus		Transporters:Transporter channels and pores; Predicted intracellular proteins	Nucleoplasm (Supported); Additional: Plasma membrane;Vesicles				0.0	0.0	0.0	0.0	0.0	0.0	0.0	0.0	0.0	0.0	0.0	0.0	0.0	0.0	0.0	0.0	0.0	0.0	0.0	0.0
LOC100131315	100131315	Gene_ID	H. sapiens	100131315	H. sapiens	GREM1-AS1	GREM1 antisense RNA 1								0.0	0.0	0.0	0.0	0.0	0.0	0.0	0.0	0.0	0.0	0.0	0.0	0.0	0.0	0.0	0.0	0.0	0.0	0.0	0.0
HS3ST4	9951	symbol	H. sapiens	9951	H. sapiens	HS3ST4	heparan sulfate-glucosamine 3-sulfotransferase 4	GO:0030201 heparan sulfate proteoglycan metabolic process;GO:0006029 proteoglycan metabolic process;GO:0009100 glycoprotein metabolic process		Enzymes; ENZYME proteins:Transferases					0.0	0.0	0.0	0.0	0.0	0.0	0.0	0.0	0.0	0.0	0.0	0.0	0.0	0.0	0.0	0.0	0.0	0.0	0.0	0.0
LOC339059	339059	Gene_ID	H. sapiens	339059	H. sapiens	LOC339059	uncharacterized LOC339059								0.0	0.0	0.0	0.0	0.0	0.0	0.0	0.0	0.0	0.0	0.0	0.0	0.0	0.0	0.0	0.0	0.0	0.0	0.0	0.0
MSX2	4488	symbol	H. sapiens	4488	H. sapiens	MSX2	msh homeobox 2	GO:0060364 frontal suture morphogenesis;GO:2001055 positive regulation of mesenchymal cell apoptotic process;GO:0035880 embryonic nail plate morphogenesis		Transcription factors:Helix-turn-helix domains; Human disease related genes:Congenital malformations:Congenital malformations of the musculoskeletal system; Human disease related genes:Congenital malformations:Other congenital malformations; Disease related genes; Predicted intracellular proteins	Nuclear speckles (Supported)				1.0	0.0	0.0	0.0	0.0	0.0	0.0	0.0	1.0	0.0	0.0	1.0	0.0	1.0	0.0	0.0	1.0	1.0	0.0	0.0
HIST1H2BB	3018	gene_synonym	H. sapiens	3018	H. sapiens	H2BC3	H2B clustered histone 3	GO:0006334 nucleosome assembly;GO:0031497 chromatin assembly;GO:0034728 nucleosome organization		Predicted intracellular proteins	Nucleoplasm (Approved); Additional: Cytosol			(M5953)HALLMARK KRAS SIGNALING UP	1.0	1.0	0.0	1.0	0.0	0.0	0.0	0.0	0.0	0.0	0.0	0.0	0.0	0.0	0.0	0.0	0.0	0.0	0.0	0.0
POU5F1P5	100009667	symbol	H. sapiens	100009667	H. sapiens	POU5F1P5	POU class 5 homeobox 1 pseudogene 5								0.0	0.0	0.0	0.0	0.0	0.0	0.0	0.0	0.0	0.0	0.0	0.0	0.0	0.0	0.0	0.0	0.0	0.0	0.0	0.0
LRP5	4041	symbol	H. sapiens	4041	H. sapiens	LRP5	LDL receptor related protein 5	GO:0060764 cell-cell signaling involved in mammary gland development;GO:0110135 Norrin signaling pathway;GO:1902262 apoptotic process involved in blood vessel morphogenesis		Human disease related genes:Congenital malformations:Congenital malformations of the musculoskeletal system; Human disease related genes:Congenital malformations:Other congenital malformations; Human disease related genes:Nervous system diseases:Eye disease; Human disease related genes:Musculoskeletal diseases:Skeletal diseases; Disease related genes; Predicted intracellular proteins			(M77)PID WNT SIGNALING PATHWAY; (M266)PID NCADHERIN PATHWAY; (M5493)WNT SIGNALING		1.0	0.0	0.0	0.0	0.0	1.0	0.0	0.0	1.0	1.0	0.0	1.0	0.0	0.0	1.0	1.0	1.0	1.0	0.0	0.0
HES6	55502	symbol	H. sapiens	55502	H. sapiens	HES6	hes family bHLH transcription factor 6	GO:0043433 negative regulation of DNA-binding transcription factor activity;GO:0009952 anterior/posterior pattern specification;GO:0003002 regionalization		Transcription factors:Basic domains; Predicted intracellular proteins	Nuclear bodies (Approved); Additional: Cytosol		(M288)PID HES HEY PATHWAY	(M5934)HALLMARK XENOBIOTIC METABOLISM	0.0	0.0	0.0	0.0	0.0	1.0	1.0	0.0	0.0	0.0	0.0	0.0	0.0	0.0	0.0	0.0	0.0	0.0	0.0	0.0
MRPL2	51069	symbol	H. sapiens	51069	H. sapiens	MRPL2	mitochondrial ribosomal protein L2	GO:0032543 mitochondrial translation;GO:0140053 mitochondrial gene expression;GO:0006412 translation		Ribosomal proteins; Predicted intracellular proteins	Mitochondria (Supported); Additional: Nucleoplasm				0.0	0.0	0.0	0.0	0.0	0.0	0.0	1.0	0.0	0.0	0.0	0.0	0.0	0.0	0.0	0.0	0.0	0.0	0.0	0.0
EBI3	10148	symbol	H. sapiens	10148	H. sapiens	EBI3	Epstein-Barr virus induced 3	GO:0033210 leptin-mediated signaling pathway;GO:0044320 cellular response to leptin stimulus;GO:0042088 T-helper 1 type immune response		Predicted secreted proteins			(M36)PID IL27 PATHWAY; (M5883)NABA SECRETED FACTORS; (M5885)NABA MATRISOME ASSOCIATED	(M5897)HALLMARK IL6 JAK STAT3 SIGNALING; (M5932)HALLMARK INFLAMMATORY RESPONSE	0.0	0.0	1.0	0.0	0.0	0.0	0.0	0.0	0.0	0.0	0.0	0.0	0.0	0.0	1.0	0.0	0.0	0.0	0.0	0.0
ATF3	467	symbol	H. sapiens	467	H. sapiens	ATF3	activating transcription factor 3	GO:0061394 regulation of transcription from RNA polymerase II promoter in response to arsenic-containing substance;GO:1903984 positive regulation of TRAIL-activated apoptotic signaling pathway;GO:1903121 regulation of TRAIL-activated apoptotic signaling pathway		Transcription factors:Basic domains; Predicted intracellular proteins	Nucleoli;Nucleoplasm (Supported)		(M166)PID ATF2 PATHWAY; (M167)PID AP1 PATHWAY; (M2)PID SMAD2 3NUCLEAR PATHWAY	(M5892)HALLMARK CHOLESTEROL HOMEOSTASIS; (M5922)HALLMARK UNFOLDED PROTEIN RESPONSE; (M5941)HALLMARK UV RESPONSE UP	1.0	0.0	0.0	0.0	0.0	0.0	0.0	1.0	1.0	1.0	0.0	0.0	0.0	0.0	0.0	0.0	0.0	0.0	0.0	0.0
ZNF469	84627	symbol	H. sapiens	84627	H. sapiens	ZNF469	zinc finger protein 469	GO:1903053 regulation of extracellular matrix organization;GO:0000122 negative regulation of transcription by RNA polymerase II;GO:0045892 negative regulation of transcription, DNA-templated		Human disease related genes:Congenital malformations:Congenital malformations of skin; Transcription factors:Zinc-coordinating DNA-binding domains; Predicted intracellular proteins; Disease related genes	Nucleoplasm (Approved); Additional: Cell Junctions				0.0	0.0	0.0	0.0	0.0	0.0	0.0	0.0	0.0	0.0	0.0	0.0	0.0	0.0	0.0	0.0	0.0	0.0	0.0	0.0
HIST2H2BA	337875	gene_synonym	H. sapiens	337875	H. sapiens	H2BP1	H2B histone pseudogene 1								0.0	0.0	0.0	0.0	0.0	0.0	0.0	0.0	0.0	0.0	0.0	0.0	0.0	0.0	0.0	0.0	0.0	0.0	0.0	0.0
BAIAP3	8938	symbol	H. sapiens	8938	H. sapiens	BAIAP3	BAI1 associated protein 3	GO:1905413 regulation of dense core granule exocytosis;GO:0061792 secretory granule maturation;GO:1990502 dense core granule maturation		Predicted intracellular proteins					0.0	0.0	1.0	0.0	0.0	0.0	0.0	0.0	0.0	0.0	0.0	0.0	0.0	0.0	0.0	0.0	0.0	0.0	0.0	0.0
RPL39	6170	symbol	H. sapiens	6170	H. sapiens	RPL39	ribosomal protein L39	GO:0002227 innate immune response in mucosa;GO:0002385 mucosal immune response;GO:0002251 organ or tissue specific immune response		Ribosomal proteins; Predicted intracellular proteins				(M5950)HALLMARK ALLOGRAFT REJECTION	1.0	0.0	0.0	0.0	0.0	0.0	0.0	1.0	0.0	0.0	0.0	0.0	0.0	0.0	0.0	0.0	0.0	0.0	0.0	0.0
FOXC2	2303	symbol	H. sapiens	2303	H. sapiens	FOXC2	forkhead box C2	GO:1902257 negative regulation of apoptotic process involved in outflow tract morphogenesis;GO:0048342 paraxial mesodermal cell differentiation;GO:0048343 paraxial mesodermal cell fate commitment		Human disease related genes:Congenital malformations:Congenital malformations of skin; Transcription factors:Helix-turn-helix domains; Predicted intracellular proteins; Disease related genes	Nuclear bodies;Nucleoplasm (Supported)			(M5930)HALLMARK EPITHELIAL MESENCHYMAL TRANSITION	0.0	0.0	0.0	0.0	0.0	1.0	0.0	0.0	1.0	0.0	0.0	1.0	0.0	1.0	0.0	0.0	0.0	1.0	0.0	1.0
TSPAN5	10098	symbol	H. sapiens	10098	H. sapiens	TSPAN5	tetraspanin 5	GO:0045747 positive regulation of Notch signaling pathway;GO:0008593 regulation of Notch signaling pathway;GO:0072659 protein localization to plasma membrane						(M5945)HALLMARK HEME METABOLISM	1.0	0.0	0.0	0.0	0.0	0.0	0.0	0.0	0.0	0.0	0.0	0.0	0.0	0.0	0.0	0.0	0.0	0.0	0.0	0.0
AKR1A1	10327	symbol	H. sapiens	10327	H. sapiens	AKR1A1	aldo-keto reductase family 1 member A1	GO:0042839 D-glucuronate metabolic process;GO:0042840 D-glucuronate catabolic process;GO:0019853 L-ascorbic acid biosynthetic process		Enzymes; Predicted intracellular proteins; ENZYME proteins:Oxidoreductases	Cytosol (Supported); Additional: Nucleoplasm	Tolrestat; Nicotinamide adenine dinucleotide phosphate; Copper		(M5937)HALLMARK GLYCOLYSIS	1.0	0.0	0.0	0.0	0.0	0.0	0.0	0.0	0.0	0.0	0.0	0.0	0.0	0.0	0.0	0.0	0.0	0.0	0.0	0.0
FBN2	2201	symbol	H. sapiens	2201	H. sapiens	FBN2	fibrillin 2	GO:0035583 sequestering of TGFbeta in extracellular matrix;GO:0060346 bone trabecula formation;GO:0071694 maintenance of protein location in extracellular region		Predicted secreted proteins; Cancer-related genes:Mutational cancer driver genes; Human disease related genes:Congenital malformations:Congenital malformations of the musculoskeletal system; Human disease related genes:Congenital malformations:Other congenital malformations; Disease related genes; Predicted intracellular proteins	Cytosol (Approved); Additional: Nucleoplasm	Calcium citrate; Calcium Phosphate; Calcium phosphate dihydrate	(M3008)NABA ECM GLYCOPROTEINS; (M5884)NABA CORE MATRISOME; (M5889)NABA MATRISOME	(M5930)HALLMARK EPITHELIAL MESENCHYMAL TRANSITION	0.0	0.0	0.0	0.0	0.0	0.0	0.0	0.0	0.0	0.0	0.0	0.0	1.0	0.0	0.0	0.0	0.0	0.0	0.0	0.0
RPS25	6230	symbol	H. sapiens	6230	H. sapiens	RPS25	ribosomal protein S25	GO:0042274 ribosomal small subunit biogenesis;GO:0002181 cytoplasmic translation;GO:0006364 rRNA processing		Ribosomal proteins; Predicted intracellular proteins	Cytosol;Endoplasmic reticulum (Supported); Additional: Nucleoli				1.0	0.0	0.0	0.0	0.0	0.0	0.0	1.0	0.0	0.0	0.0	0.0	0.0	0.0	0.0	0.0	0.0	0.0	0.0	0.0
HBEGF	1839	symbol	H. sapiens	1839	H. sapiens	HBEGF	heparin binding EGF like growth factor	GO:0051543 regulation of elastin biosynthetic process;GO:0051545 negative regulation of elastin biosynthetic process;GO:0035313 wound healing, spreading of epidermal cells		Predicted secreted proteins			(M201)PID ERBB NETWORK PATHWAY; (M13)PID ERBB4 PATHWAY; (M41)PID ER NONGENOMIC PATHWAY	(M5890)HALLMARK TNFA SIGNALING VIA NFKB; (M5909)HALLMARK MYOGENESIS; (M5932)HALLMARK INFLAMMATORY RESPONSE	1.0	0.0	0.0	0.0	0.0	0.0	1.0	1.0	1.0	0.0	1.0	0.0	0.0	1.0	0.0	1.0	0.0	0.0	1.0	1.0
HYOU1	10525	symbol	H. sapiens	10525	H. sapiens	HYOU1	hypoxia up-regulated 1	GO:1903381 regulation of endoplasmic reticulum stress-induced neuron intrinsic apoptotic signaling pathway;GO:1903382 negative regulation of endoplasmic reticulum stress-induced neuron intrinsic apoptotic signaling pathway;GO:1903297 regulation of hypoxia-induced intrinsic apoptotic signaling pathway		Transporters:Primary Active Transporters; Predicted intracellular proteins; Disease related genes; Potential drug targets				(M5922)HALLMARK UNFOLDED PROTEIN RESPONSE	1.0	0.0	0.0	0.0	0.0	0.0	0.0	0.0	0.0	0.0	0.0	0.0	0.0	0.0	0.0	0.0	0.0	0.0	0.0	0.0
FOXC2-AS1	103752587	symbol	H. sapiens	103752587	H. sapiens	FOXC2-AS1	FOXC2 antisense RNA 1								0.0	0.0	0.0	0.0	0.0	0.0	0.0	0.0	0.0	0.0	0.0	0.0	0.0	0.0	0.0	0.0	0.0	0.0	0.0	0.0
NSUN5P2	260294	symbol	H. sapiens	260294	H. sapiens	NSUN5P2	NSUN5 pseudogene 2	GO:0070475 rRNA base methylation;GO:0031167 rRNA methylation;GO:0000154 rRNA modification							0.0	0.0	0.0	0.0	0.0	0.0	0.0	0.0	0.0	0.0	0.0	0.0	0.0	0.0	0.0	0.0	0.0	0.0	0.0	0.0
CBX2	84733	symbol	H. sapiens	84733	H. sapiens	CBX2	chromobox 2	GO:0045137 development of primary sexual characteristics;GO:0007548 sex differentiation;GO:0006325 chromatin organization		Predicted intracellular proteins; Disease related genes; Human disease related genes:Reproductive system diseases:Reproductive system diseases	Nucleoplasm (Supported)				1.0	0.0	0.0	0.0	0.0	0.0	0.0	0.0	0.0	0.0	1.0	0.0	0.0	0.0	0.0	0.0	0.0	0.0	0.0	0.0
TM4SF1	4071	symbol	H. sapiens	4071	H. sapiens	TM4SF1	transmembrane 4 L six family member 1	GO:0001825 blastocyst formation;GO:0001824 blastocyst development;GO:0001701 in utero embryonic development						(M5939)HALLMARK P53 PATHWAY	0.0	0.0	0.0	0.0	0.0	0.0	0.0	0.0	0.0	0.0	0.0	0.0	0.0	0.0	0.0	0.0	0.0	0.0	0.0	0.0
DBH-AS1	138948	symbol	H. sapiens	138948	H. sapiens	DBH-AS1	DBH antisense RNA 1								0.0	0.0	0.0	0.0	0.0	0.0	0.0	0.0	0.0	0.0	0.0	0.0	0.0	0.0	0.0	0.0	0.0	0.0	0.0	0.0
PLCXD2	257068	symbol	H. sapiens	257068	H. sapiens	PLCXD2	phosphatidylinositol specific phospholipase C X domain containing 2	GO:0016042 lipid catabolic process;GO:0006629 lipid metabolic process;GO:1901575 organic substance catabolic process		Predicted intracellular proteins	Nucleoplasm (Approved)				0.0	0.0	0.0	0.0	0.0	0.0	0.0	0.0	0.0	0.0	0.0	0.0	0.0	0.0	0.0	0.0	0.0	0.0	0.0	0.0
GNG10	2790	symbol	H. sapiens	2790	H. sapiens	GNG10	G protein subunit gamma 10	GO:0007186 G protein-coupled receptor signaling pathway;GO:0007165 signal transduction;GO:0023052 signaling		RAS pathway related proteins; Predicted intracellular proteins					1.0	0.0	1.0	0.0	0.0	1.0	0.0	0.0	1.0	0.0	0.0	0.0	1.0	0.0	0.0	1.0	0.0	0.0	0.0	0.0
BLID	414899	symbol	H. sapiens	414899	H. sapiens	BLID	BH3-like motif containing, cell death inducer	GO:0043280 positive regulation of cysteine-type endopeptidase activity involved in apoptotic process;GO:2001056 positive regulation of cysteine-type endopeptidase activity;GO:0010950 positive regulation of endopeptidase activity		Predicted intracellular proteins					0.0	0.0	0.0	0.0	0.0	0.0	0.0	0.0	0.0	0.0	0.0	0.0	0.0	0.0	0.0	0.0	0.0	0.0	0.0	0.0
KMT2E-AS1	100216545	symbol	H. sapiens	100216545	H. sapiens	KMT2E-AS1	KMT2E antisense RNA 1								0.0	0.0	0.0	0.0	0.0	0.0	0.0	0.0	0.0	0.0	0.0	0.0	0.0	0.0	0.0	0.0	0.0	0.0	0.0	0.0
RTN1	6252	symbol	H. sapiens	6252	H. sapiens	RTN1	reticulon 1	GO:1902430 negative regulation of amyloid-beta formation;GO:1902992 negative regulation of amyloid precursor protein catabolic process;GO:1902003 regulation of amyloid-beta formation		Transporters:Accessory Factors Involved in Transport	Endoplasmic reticulum (Supported); Additional: Nuclear bodies			(M5919)HALLMARK HEDGEHOG SIGNALING	0.0	0.0	0.0	0.0	0.0	0.0	0.0	0.0	0.0	0.0	0.0	0.0	0.0	0.0	0.0	0.0	0.0	0.0	0.0	0.0
SND1	27044	symbol	H. sapiens	27044	H. sapiens	SND1	staphylococcal nuclease and tudor domain containing 1	GO:0010587 miRNA catabolic process;GO:0010586 miRNA metabolic process;GO:0034661 ncRNA catabolic process		Enzymes; ENZYME proteins:Hydrolases; Predicted intracellular proteins; Cancer-related genes	Cytosol (Enhanced)		(M195)PID CMYB PATHWAY		1.0	0.0	0.0	0.0	0.0	0.0	0.0	0.0	0.0	0.0	0.0	1.0	0.0	0.0	0.0	0.0	0.0	0.0	0.0	0.0
PDCD2L	84306	symbol	H. sapiens	84306	H. sapiens	PDCD2L	programmed cell death 2 like	GO:0007049 cell cycle;GO:0009987 cellular process;GO:0008150 biological_process		Predicted intracellular proteins; Cancer-related genes:Mutated cancer genes	Mitochondria (Approved)			(M5947)HALLMARK IL2 STAT5 SIGNALING	0.0	0.0	0.0	0.0	0.0	0.0	0.0	0.0	0.0	0.0	0.0	0.0	0.0	0.0	0.0	0.0	0.0	0.0	0.0	0.0
GSG1L	146395	symbol	H. sapiens	146395	H. sapiens	GSG1L	GSG1 like	GO:0099149 regulation of postsynaptic neurotransmitter receptor internalization;GO:2000311 regulation of AMPA receptor activity;GO:0002090 regulation of receptor internalization		Transporters:Accessory Factors Involved in Transport					0.0	0.0	0.0	0.0	0.0	0.0	0.0	0.0	0.0	0.0	0.0	0.0	0.0	0.0	0.0	0.0	0.0	0.0	1.0	0.0
TINAGL1	64129	symbol	H. sapiens	64129	H. sapiens	TINAGL1	tubulointerstitial nephritis antigen like 1	GO:0016197 endosomal transport;GO:0016192 vesicle-mediated transport;GO:0046907 intracellular transport		Enzymes; Predicted secreted proteins; Predicted intracellular proteins; Peptidases:Cysteine-type peptidases			(M3008)NABA ECM GLYCOPROTEINS; (M5884)NABA CORE MATRISOME; (M5889)NABA MATRISOME		0.0	0.0	0.0	0.0	0.0	0.0	0.0	0.0	0.0	0.0	0.0	0.0	1.0	0.0	0.0	0.0	0.0	0.0	0.0	0.0
TULP4	56995	symbol	H. sapiens	56995	H. sapiens	TULP4	TUB like protein 4	GO:0016567 protein ubiquitination;GO:0032446 protein modification by small protein conjugation;GO:0070647 protein modification by small protein conjugation or removal		Predicted intracellular proteins					0.0	0.0	0.0	0.0	0.0	0.0	0.0	0.0	0.0	0.0	0.0	0.0	0.0	0.0	0.0	0.0	0.0	0.0	0.0	0.0
TNFSF15	9966	symbol	H. sapiens	9966	H. sapiens	TNFSF15	TNF superfamily member 15	GO:0007250 activation of NF-kappaB-inducing kinase activity;GO:0038061 NIK/NF-kappaB signaling;GO:0006919 activation of cysteine-type endopeptidase activity involved in apoptotic process		Predicted secreted proteins; Predicted intracellular proteins; Human disease related genes:Immune system diseases:Other immune system diseases	Nuclear membrane (Approved); Additional: Cytosol;Nucleoplasm		(M5883)NABA SECRETED FACTORS; (M5885)NABA MATRISOME ASSOCIATED; (M5889)NABA MATRISOME	(M5932)HALLMARK INFLAMMATORY RESPONSE	0.0	0.0	1.0	0.0	0.0	0.0	0.0	0.0	0.0	0.0	0.0	0.0	0.0	0.0	0.0	1.0	0.0	0.0	0.0	0.0
LRRC75A	388341	symbol	H. sapiens	388341	H. sapiens	LRRC75A	leucine rich repeat containing 75A			Predicted intracellular proteins	Nucleoplasm (Approved); Additional: Cytosol;Nucleoli				0.0	0.0	0.0	0.0	0.0	0.0	0.0	0.0	0.0	0.0	0.0	0.0	0.0	0.0	0.0	0.0	0.0	0.0	0.0	0.0
NDUFA2	4695	symbol	H. sapiens	4695	H. sapiens	NDUFA2	NADH:ubiquinone oxidoreductase subunit A2	GO:0001835 blastocyst hatching;GO:0035188 hatching;GO:0071684 organism emergence from protective structure		Predicted intracellular proteins; Disease related genes; Human disease related genes:Congenital disorders of metabolism:Mitochondrial diseases		NADH		(M5936)HALLMARK OXIDATIVE PHOSPHORYLATION	0.0	0.0	0.0	0.0	0.0	0.0	0.0	0.0	0.0	0.0	0.0	0.0	0.0	0.0	0.0	0.0	0.0	0.0	0.0	0.0
CBX4	8535	symbol	H. sapiens	8535	H. sapiens	CBX4	chromobox 4	GO:0016925 protein sumoylation;GO:0018205 peptidyl-lysine modification;GO:0006325 chromatin organization		Predicted intracellular proteins	Nucleoplasm (Enhanced); Additional: Nuclear bodies		(M279)PID RB 1PATHWAY; (M195)PID CMYB PATHWAY		1.0	0.0	0.0	0.0	0.0	0.0	0.0	0.0	0.0	0.0	1.0	0.0	0.0	0.0	0.0	0.0	0.0	0.0	0.0	0.0
MMP13	4322	symbol	H. sapiens	4322	H. sapiens	MMP13	matrix metallopeptidase 13	GO:0003417 growth plate cartilage development;GO:0003416 endochondral bone growth;GO:0001958 endochondral ossification		Cancer-related genes:Candidate cancer biomarkers; Predicted secreted proteins; Peptidases:Metallopeptidases; Human disease related genes:Congenital malformations:Congenital malformations of the musculoskeletal system; Disease related genes; Potential drug targets; Enzymes		Marimastat; 3-Methylpyridine; 2-{4-[4-(4-Chloro-Phenoxy)-Benzenesulfonyl]-Tetrahydro-Pyran-4-Yl}-N-Hydroxy-Acetamide; WAY-151693; Hydroxyaminovaline; 4-methoxybenzenesulfinate; PYRIMIDINE-4,6-DICARBOXYLIC ACID BIS-(3-METHYL-BENZYLAMIDE); PYRIMIDINE-4,6-DICARBOXYLIC ACID BIS-(4-FLUORO-3-METHYL-BENZYLAMIDE); PYRIMIDINE-4,6-DICARBOXYLIC ACID BIS-[(PYRIDIN-3-YLMETHYL)-AMIDE]; Endostatin; TERT-BUTYL 4…	(M174)PID UPA UPAR PATHWAY; (M3468)NABA ECM REGULATORS; (M5885)NABA MATRISOME ASSOCIATED	(M5921)HALLMARK COMPLEMENT	0.0	0.0	0.0	0.0	0.0	0.0	0.0	0.0	0.0	0.0	0.0	1.0	1.0	0.0	0.0	0.0	0.0	0.0	0.0	0.0
PWARSN	347746	symbol	H. sapiens	347746	H. sapiens	PWARSN	Prader Willi/Angelman region RNA, SNRPN neighbor	GO:0006396 RNA processing;GO:0016070 RNA metabolic process;GO:0010467 gene expression							0.0	0.0	0.0	0.0	0.0	0.0	0.0	0.0	0.0	0.0	0.0	0.0	0.0	0.0	0.0	0.0	0.0	0.0	0.0	0.0
ADGRL3	23284	symbol	H. sapiens	23284	H. sapiens	ADGRL3	adhesion G protein-coupled receptor L3	GO:0007416 synapse assembly;GO:0001764 neuron migration;GO:0007189 adenylate cyclase-activating G protein-coupled receptor signaling pathway		G-protein coupled receptors:GPCRs excl olfactory receptors; Transporters; G-protein coupled receptors:Family 2 (B) receptors					0.0	0.0	0.0	0.0	0.0	0.0	0.0	0.0	0.0	0.0	0.0	0.0	0.0	0.0	0.0	0.0	0.0	0.0	0.0	0.0
PLCH2	9651	symbol	H. sapiens	9651	H. sapiens	PLCH2	phospholipase C eta 2	GO:0048015 phosphatidylinositol-mediated signaling;GO:0048017 inositol lipid-mediated signaling;GO:0046488 phosphatidylinositol metabolic process		Enzymes; ENZYME proteins:Hydrolases; Predicted intracellular proteins					0.0	0.0	0.0	0.0	0.0	0.0	0.0	0.0	0.0	0.0	0.0	0.0	0.0	0.0	0.0	0.0	0.0	0.0	0.0	0.0
ANXA10	11199	symbol	H. sapiens	11199	H. sapiens	ANXA10	annexin A10			Predicted intracellular proteins	Nucleoli;Nucleoplasm (Approved); Additional: Vesicles		(M5880)NABA ECM AFFILIATED; (M5885)NABA MATRISOME ASSOCIATED; (M5889)NABA MATRISOME	(M5953)HALLMARK KRAS SIGNALING UP	0.0	0.0	0.0	0.0	0.0	0.0	0.0	0.0	0.0	0.0	0.0	0.0	0.0	0.0	0.0	0.0	0.0	0.0	0.0	0.0
CCR10	2826	symbol	H. sapiens	2826	H. sapiens	CCR10	C-C motif chemokine receptor 10	GO:0070098 chemokine-mediated signaling pathway;GO:1990868 response to chemokine;GO:1990869 cellular response to chemokine		G-protein coupled receptors:GPCRs excl olfactory receptors; G-protein coupled receptors:Chemokines and chemotactic factors receptors; Cancer-related genes:Candidate cancer biomarkers	Endoplasmic reticulum (Supported)				0.0	0.0	0.0	0.0	0.0	0.0	1.0	0.0	0.0	0.0	0.0	0.0	0.0	0.0	0.0	0.0	0.0	0.0	0.0	0.0
LINC01197	400456	gene_synonym	H. sapiens	400456	H. sapiens	LETR1	lymphatic endothelial transcriptional regulator lncRNA 1								0.0	0.0	0.0	0.0	0.0	0.0	0.0	0.0	0.0	0.0	0.0	0.0	0.0	0.0	0.0	0.0	0.0	0.0	0.0	0.0
NNAT	4826	symbol	H. sapiens	4826	H. sapiens	NNAT	neuronatin	GO:0009249 protein lipoylation;GO:0032024 positive regulation of insulin secretion;GO:0090277 positive regulation of peptide hormone secretion							0.0	0.0	0.0	0.0	0.0	0.0	0.0	0.0	0.0	0.0	0.0	0.0	0.0	0.0	0.0	0.0	0.0	0.0	0.0	0.0
KCNV2	169522	symbol	H. sapiens	169522	H. sapiens	KCNV2	potassium voltage-gated channel modifier subfamily V member 2	GO:0071805 potassium ion transmembrane transport;GO:0006813 potassium ion transport;GO:0051260 protein homooligomerization		Voltage-gated ion channels:Voltage-Gated Potassium Channels; Human disease related genes:Nervous system diseases:Eye disease; Disease related genes; Potential drug targets; Transporters:Transporter channels and pores					0.0	0.0	0.0	0.0	0.0	0.0	0.0	0.0	0.0	0.0	0.0	0.0	0.0	0.0	0.0	0.0	0.0	0.0	1.0	0.0
EREG	2069	symbol	H. sapiens	2069	H. sapiens	EREG	epiregulin	GO:0042700 luteinizing hormone signaling pathway;GO:0048160 primary follicle stage;GO:0001550 ovarian cumulus expansion		Human disease related genes:Cancers:Cancers of the digestive system; Predicted secreted proteins	Vesicles (Approved)		(M201)PID ERBB NETWORK PATHWAY; (M13)PID ERBB4 PATHWAY; (M5883)NABA SECRETED FACTORS	(M5902)HALLMARK APOPTOSIS; (M5932)HALLMARK INFLAMMATORY RESPONSE; (M5950)HALLMARK ALLOGRAFT REJECTION	1.0	0.0	0.0	0.0	0.0	0.0	0.0	0.0	1.0	0.0	1.0	1.0	0.0	1.0	0.0	1.0	0.0	1.0	1.0	0.0
KISS1	3814	symbol	H. sapiens	3814	H. sapiens	KISS1	KiSS-1 metastasis suppressor	GO:0060112 generation of ovulation cycle rhythm;GO:0033686 positive regulation of luteinizing hormone secretion;GO:0033684 regulation of luteinizing hormone secretion		Human disease related genes:Endocrine and metabolic diseases:Hypothalamus and pituitary gland diseases; Predicted secreted proteins; Disease related genes; Cancer-related genes:Candidate cancer biomarkers	Vesicles (Approved)				0.0	0.0	0.0	0.0	0.0	0.0	0.0	0.0	0.0	0.0	0.0	0.0	0.0	1.0	0.0	0.0	0.0	0.0	0.0	0.0
ZNF48	197407	symbol	H. sapiens	197407	H. sapiens	ZNF48	zinc finger protein 48	GO:0045944 positive regulation of transcription by RNA polymerase II;GO:0045893 positive regulation of transcription, DNA-templated;GO:1903508 positive regulation of nucleic acid-templated transcription		Predicted intracellular proteins; Transcription factors:Zinc-coordinating DNA-binding domains	Mitochondria (Approved)				0.0	0.0	0.0	0.0	0.0	0.0	0.0	0.0	0.0	0.0	0.0	0.0	0.0	0.0	0.0	0.0	0.0	0.0	0.0	0.0
DOCK10	55619	symbol	H. sapiens	55619	H. sapiens	DOCK10	dedicator of cytokinesis 10	GO:0002315 marginal zone B cell differentiation;GO:0060997 dendritic spine morphogenesis;GO:0002313 mature B cell differentiation involved in immune response		Predicted intracellular proteins	Cytosol;Nucleoplasm (Supported)		(M83)PID CDC42 REG PATHWAY	(M5921)HALLMARK COMPLEMENT	1.0	0.0	1.0	0.0	0.0	0.0	1.0	0.0	0.0	0.0	0.0	0.0	0.0	0.0	1.0	0.0	0.0	0.0	0.0	0.0
HHEX	3087	symbol	H. sapiens	3087	H. sapiens	HHEX	hematopoietically expressed homeobox	GO:0010621 negative regulation of transcription by transcription factor localization;GO:0010944 negative regulation of transcription by competitive promoter binding;GO:0030948 negative regulation of vascular endothelial growth factor receptor signaling pathway		Transcription factors:Helix-turn-helix domains; Human disease related genes:Endocrine and metabolic diseases:Diabetes; Predicted intracellular proteins	Nucleoplasm (Approved); Additional: Nuclear bodies			(M5938)HALLMARK REACTIVE OXYGEN SPECIES PATHWAY	1.0	0.0	1.0	0.0	0.0	0.0	0.0	0.0	0.0	1.0	0.0	0.0	0.0	0.0	1.0	1.0	0.0	0.0	0.0	0.0
PSMB4	5692	symbol	H. sapiens	5692	H. sapiens	PSMB4	proteasome 20S subunit beta 4	GO:0002862 negative regulation of inflammatory response to antigenic stimulus;GO:0002861 regulation of inflammatory response to antigenic stimulus;GO:0050777 negative regulation of immune response		Peptidases:Threonine-type peptidases; Disease related genes; Potential drug targets; Enzymes; Predicted intracellular proteins	Nucleoplasm (Uncertain); Additional: Mitochondria	(3AR,6R,6AS)-6-((S)-((S)-CYCLOHEX-2-ENYL)(HYDROXY)METHYL)-6A-METHYL-4-OXO-HEXAHYDRO-2H-FURO[3,2-C]PYRROLE-6-CARBALDEHYDE			1.0	1.0	1.0	0.0	1.0	0.0	0.0	1.0	0.0	0.0	1.0	0.0	0.0	0.0	0.0	1.0	0.0	0.0	0.0	0.0
RAB27B	5874	symbol	H. sapiens	5874	H. sapiens	RAB27B	RAB27B, member RAS oncogene family	GO:0099640 axo-dendritic protein transport;GO:0099641 anterograde axonal protein transport;GO:1905383 protein localization to presynapse		Enzymes; ENZYME proteins:Hydrolases; Predicted intracellular proteins	Golgi apparatus;Plasma membrane (Approved); Additional: Cytosol				0.0	0.0	1.0	0.0	0.0	0.0	0.0	0.0	0.0	0.0	0.0	0.0	0.0	0.0	0.0	0.0	0.0	0.0	0.0	0.0
PTENP1	11191	symbol	H. sapiens	11191	H. sapiens	PTENP1	phosphatase and tensin homolog pseudogene 1								0.0	0.0	0.0	0.0	0.0	0.0	0.0	0.0	0.0	0.0	0.0	0.0	0.0	0.0	0.0	0.0	0.0	0.0	0.0	0.0
TMEM184A	202915	symbol	H. sapiens	202915	H. sapiens	TMEM184A	transmembrane protein 184A	GO:0006810 transport;GO:0051234 establishment of localization;GO:0051179 localization		Transporters:Electrochemical Potential-driven transporters	Nucleoplasm (Uncertain)				0.0	0.0	0.0	0.0	0.0	0.0	0.0	0.0	0.0	0.0	0.0	0.0	0.0	0.0	0.0	0.0	0.0	0.0	0.0	0.0
CYP26C1	340665	symbol	H. sapiens	340665	H. sapiens	CYP26C1	cytochrome P450 family 26 subfamily C member 1	GO:0016103 diterpenoid catabolic process;GO:0034653 retinoic acid catabolic process;GO:0048387 negative regulation of retinoic acid receptor signaling pathway		Human disease related genes:Congenital malformations:Congenital malformations of skin; Disease related genes		Alitretinoin; Tretinoin			1.0	0.0	0.0	0.0	0.0	0.0	0.0	0.0	0.0	0.0	0.0	0.0	0.0	0.0	0.0	0.0	0.0	0.0	0.0	0.0
CDC26	246184	symbol	H. sapiens	246184	H. sapiens	CDC26	cell division cycle 26	GO:0070979 protein K11-linked ubiquitination;GO:0030071 regulation of mitotic metaphase/anaphase transition;GO:1902099 regulation of metaphase/anaphase transition of cell cycle		Predicted intracellular proteins	Nucleoplasm (Approved)				1.0	0.0	0.0	0.0	0.0	0.0	0.0	0.0	0.0	0.0	0.0	0.0	0.0	0.0	0.0	0.0	0.0	0.0	0.0	0.0
ACY1	95	symbol	H. sapiens	95	H. sapiens	ACY1	aminoacylase 1	GO:0006520 cellular amino acid metabolic process;GO:0019752 carboxylic acid metabolic process;GO:0043436 oxoacid metabolic process		ENZYME proteins:Hydrolases; Peptidases:Metallopeptidases; Human disease related genes:Congenital disorders of metabolism:Congenital disorders of amino acid metabolism; Disease related genes; Potential drug targets; Enzymes; Predicted intracellular proteins		Aspartic acid; Acetylcysteine; Copper			0.0	0.0	0.0	0.0	0.0	0.0	0.0	0.0	0.0	0.0	0.0	0.0	0.0	0.0	0.0	0.0	0.0	0.0	0.0	0.0
PLSCR3	57048	symbol	H. sapiens	57048	H. sapiens	PLSCR3	phospholipid scramblase 3	GO:0032049 cardiolipin biosynthetic process;GO:0006655 phosphatidylglycerol biosynthetic process;GO:0032048 cardiolipin metabolic process		Transporters; Predicted intracellular proteins	Mitochondria (Supported)				0.0	0.0	0.0	0.0	0.0	0.0	0.0	0.0	0.0	0.0	0.0	0.0	0.0	0.0	0.0	0.0	0.0	0.0	0.0	0.0
WNK3	65267	symbol	H. sapiens	65267	H. sapiens	WNK3	WNK lysine deficient protein kinase 3	GO:0007231 osmosensory signaling pathway;GO:1903288 positive regulation of potassium ion import across plasma membrane;GO:1903286 regulation of potassium ion import	Other	Enzymes; Kinases; Predicted intracellular proteins; ENZYME proteins:Transferases	Vesicles (Approved)				0.0	0.0	0.0	0.0	0.0	0.0	0.0	0.0	0.0	0.0	0.0	0.0	0.0	0.0	0.0	1.0	0.0	0.0	1.0	1.0
NETO2	81831	symbol	H. sapiens	81831	H. sapiens	NETO2	neuropilin and tolloid like 2	GO:2000312 regulation of kainate selective glutamate receptor activity;GO:2000649 regulation of sodium ion transmembrane transporter activity;GO:0099601 regulation of neurotransmitter receptor activity		Transporters:Accessory Factors Involved in Transport	Golgi apparatus (Approved)				0.0	0.0	0.0	0.0	0.0	0.0	0.0	0.0	0.0	0.0	0.0	0.0	0.0	0.0	0.0	0.0	0.0	0.0	1.0	0.0
FAM43A	131583	symbol	H. sapiens	131583	H. sapiens	FAM43A	family with sequence similarity 43 member A			Predicted intracellular proteins	Vesicles (Approved)				0.0	0.0	0.0	0.0	0.0	0.0	0.0	0.0	0.0	0.0	0.0	0.0	0.0	0.0	0.0	0.0	0.0	0.0	0.0	0.0
FOSB	2354	symbol	H. sapiens	2354	H. sapiens	FOSB	FosB proto-oncogene, AP-1 transcription factor subunit	GO:0051412 response to corticosterone;GO:0014072 response to isoquinoline alkaloid;GO:0043278 response to morphine		Transcription factors:Basic domains; Predicted intracellular proteins	Nucleoplasm (Supported); Additional: Vesicles		(M167)PID AP1 PATHWAY	(M5941)HALLMARK UV RESPONSE UP; (M5890)HALLMARK TNFA SIGNALING VIA NFKB	1.0	0.0	0.0	0.0	0.0	0.0	0.0	0.0	1.0	0.0	0.0	0.0	0.0	0.0	0.0	0.0	0.0	0.0	0.0	0.0
TMEM14E	645843	gene_synonym	H. sapiens	645843	H. sapiens	TMEM14EP	transmembrane protein 14E, pseudogene	GO:0070453 regulation of heme biosynthetic process;GO:1901463 regulation of tetrapyrrole biosynthetic process;GO:1901401 regulation of tetrapyrrole metabolic process							0.0	0.0	0.0	0.0	0.0	0.0	0.0	0.0	0.0	0.0	0.0	0.0	0.0	0.0	0.0	0.0	0.0	0.0	0.0	0.0
ACHE	43	symbol	H. sapiens	43	H. sapiens	ACHE	acetylcholinesterase (Cartwright blood group)	GO:0032223 negative regulation of synaptic transmission, cholinergic;GO:0001507 acetylcholine catabolic process in synaptic cleft;GO:0006581 acetylcholine catabolic process		FDA approved drug targets:Small molecule drugs; ENZYME proteins:Hydrolases; Enzymes; Blood group antigen proteins; Predicted intracellular proteins	Golgi apparatus (Approved); Additional: Vesicles	Choline; Tacrine; Carbamoylcholine; Dipivefrin; Gallamine triethiodide; Pyridostigmine; Galantamine; Isoflurophate; Pralidoxime; Minaprine; Donepezil; Ranitidine; Demecarium; Physostigmine; Rivastigmine; Edrophonium; Ambenonium; Tubocurarine; Decamethonium; Neostigmine; Monoisopropylphosphorylserine; Propidium; 3,8-Diamino-6-Phenyl-5-[6-[1-[2-[(1,2,3,4-Tetrahydro-9-Acridinyl)Amino]Ethyl]-1h-1,2,3…	(M166)PID ATF2 PATHWAY	(M5919)HALLMARK HEDGEHOG SIGNALING; (M5909)HALLMARK MYOGENESIS; (M5950)HALLMARK ALLOGRAFT REJECTION	0.0	0.0	0.0	0.0	0.0	0.0	0.0	0.0	0.0	0.0	0.0	1.0	0.0	0.0	0.0	0.0	0.0	0.0	0.0	0.0
EPHA2	1969	symbol	H. sapiens	1969	H. sapiens	EPHA2	EPH receptor A2	GO:0060034 notochord cell differentiation;GO:0060035 notochord cell development;GO:0014028 notochord formation	Tyr protein kinase family	FDA approved drug targets:Small molecule drugs; Cancer-related genes:Mutated cancer genes; Cancer-related genes:Candidate cancer biomarkers; Human disease related genes:Nervous system diseases:Eye disease; Kinases:Tyr protein kinases; Disease related genes; Enzymes; RAS pathway related proteins; ENZYME proteins:Transferases	Cell Junctions;Plasma membrane (Supported); Additional: Golgi apparatus;Nuclear speckles	Dasatinib; Phosphoaminophosphonic Acid-Adenylate Ester; Regorafenib; Fostamatinib	(M273)PID EPHA2 FWD PATHWAY; (M177)PID EPHA FWDPATHWAY; (M86)PID ARF6 PATHWAY	(M5934)HALLMARK XENOBIOTIC METABOLISM; (M5939)HALLMARK P53 PATHWAY	1.0	0.0	0.0	0.0	0.0	0.0	1.0	1.0	1.0	0.0	0.0	1.0	0.0	0.0	1.0	1.0	0.0	1.0	0.0	0.0
UPP1	7378	symbol	H. sapiens	7378	H. sapiens	UPP1	uridine phosphorylase 1	GO:0006218 uridine catabolic process;GO:0046108 uridine metabolic process;GO:0046074 dTMP catabolic process		Enzymes; Predicted intracellular proteins; ENZYME proteins:Transferases	Nucleoplasm (Enhanced)	5-Benzylacyclouridine		(M5913)HALLMARK INTERFERON GAMMA RESPONSE; (M5934)HALLMARK XENOBIOTIC METABOLISM; (M5939)HALLMARK P53 PATHWAY	1.0	0.0	0.0	0.0	0.0	0.0	0.0	0.0	0.0	0.0	0.0	0.0	0.0	0.0	0.0	0.0	0.0	0.0	0.0	0.0
LOC100288069	100288069	Gene_ID	H. sapiens	100288069	H. sapiens	LOC100288069	uncharacterized LOC100288069								0.0	0.0	0.0	0.0	0.0	0.0	0.0	0.0	0.0	0.0	0.0	0.0	0.0	0.0	0.0	0.0	0.0	0.0	0.0	0.0
EGLN3	112399	symbol	H. sapiens	112399	H. sapiens	EGLN3	egl-9 family hypoxia inducible factor 3	GO:0018401 peptidyl-proline hydroxylation to 4-hydroxy-L-proline;GO:0019511 peptidyl-proline hydroxylation;GO:0018126 protein hydroxylation		Enzymes; Predicted intracellular proteins; ENZYME proteins:Oxidoreductases	Cytosol (Supported)	Ascorbic acid; Roxadustat	(M180)PID HIF1A PATHWAY; (M44)PID HIF2PATHWAY; (M255)PID HIF1 TFPATHWAY	(M5924)HALLMARK MTORC1 SIGNALING; (M5937)HALLMARK GLYCOLYSIS	1.0	0.0	0.0	0.0	0.0	1.0	0.0	0.0	0.0	0.0	0.0	0.0	0.0	0.0	0.0	0.0	0.0	0.0	0.0	0.0
GAN	8139	symbol	H. sapiens	8139	H. sapiens	GAN	gigaxonin	GO:0016567 protein ubiquitination;GO:0032446 protein modification by small protein conjugation;GO:0070647 protein modification by small protein conjugation or removal		Predicted intracellular proteins; Human disease related genes:Nervous system diseases:Neurodegenerative diseases; Disease related genes	Microtubules (Supported)				0.0	0.0	0.0	0.0	0.0	0.0	0.0	0.0	0.0	0.0	0.0	0.0	0.0	0.0	0.0	0.0	0.0	0.0	0.0	0.0
DGKD	8527	symbol	H. sapiens	8527	H. sapiens	DGKD	diacylglycerol kinase delta	GO:0090038 negative regulation of protein kinase C signaling;GO:2000370 positive regulation of clathrin-dependent endocytosis;GO:0046834 lipid phosphorylation		Enzymes; Predicted intracellular proteins; ENZYME proteins:Transferases	Cytosol (Supported)	Phosphatidyl serine			0.0	0.0	1.0	0.0	0.0	0.0	0.0	0.0	1.0	0.0	0.0	0.0	0.0	1.0	1.0	0.0	0.0	0.0	0.0	0.0
SLC25A33	84275	symbol	H. sapiens	84275	H. sapiens	SLC25A33	solute carrier family 25 member 33	GO:0006864 pyrimidine nucleotide transport;GO:1990519 pyrimidine nucleotide import into mitochondrion;GO:0031930 mitochondria-nucleus signaling pathway		Transporters:Electrochemical Potential-driven transporters					1.0	0.0	0.0	0.0	0.0	0.0	0.0	0.0	0.0	0.0	0.0	0.0	0.0	0.0	0.0	0.0	0.0	0.0	0.0	1.0
RNF138P1	379013	symbol	H. sapiens	379013	H. sapiens	RNF138P1	ring finger protein 138 pseudogene 1								0.0	0.0	0.0	0.0	0.0	0.0	0.0	0.0	0.0	0.0	0.0	0.0	0.0	0.0	0.0	0.0	0.0	0.0	0.0	0.0
ATXN7L2	127002	symbol	H. sapiens	127002	H. sapiens	ATXN7L2	ataxin 7 like 2			Predicted intracellular proteins	Nucleoli rim (Approved); Additional: Cytosol;Vesicles				0.0	0.0	0.0	0.0	0.0	0.0	0.0	0.0	0.0	0.0	0.0	0.0	0.0	0.0	0.0	0.0	0.0	0.0	0.0	0.0
MEX3D	399664	symbol	H. sapiens	399664	H. sapiens	MEX3D	mex-3 RNA binding family member D	GO:0010609 mRNA localization resulting in posttranscriptional regulation of gene expression;GO:0008298 intracellular mRNA localization;GO:0061157 mRNA destabilization		Predicted intracellular proteins					0.0	0.0	0.0	0.0	0.0	0.0	0.0	0.0	0.0	0.0	0.0	0.0	0.0	0.0	0.0	0.0	0.0	0.0	0.0	0.0
ELFN1	392617	symbol	H. sapiens	392617	H. sapiens	ELFN1	extracellular leucine rich repeat and fibronectin type III domain containing 1	GO:0050808 synapse organization;GO:0034330 cell junction organization;GO:0043086 negative regulation of catalytic activity			Cell Junctions;Nucleoplasm (Approved)		(M5880)NABA ECM AFFILIATED; (M5885)NABA MATRISOME ASSOCIATED; (M5889)NABA MATRISOME		0.0	0.0	0.0	0.0	0.0	0.0	0.0	0.0	0.0	0.0	0.0	0.0	0.0	0.0	0.0	0.0	0.0	0.0	0.0	0.0
DHRS13	147015	symbol	H. sapiens	147015	H. sapiens	DHRS13	dehydrogenase/reductase 13	GO:0042574 retinal metabolic process;GO:0042572 retinol metabolic process;GO:0006081 cellular aldehyde metabolic process		Predicted secreted proteins; Predicted intracellular proteins	Vesicles (Approved)				0.0	0.0	0.0	0.0	0.0	0.0	0.0	0.0	0.0	0.0	0.0	0.0	0.0	0.0	0.0	0.0	0.0	0.0	0.0	0.0
POLR3D	661	symbol	H. sapiens	661	H. sapiens	POLR3D	RNA polymerase III subunit D	GO:0006383 transcription by RNA polymerase III;GO:0032728 positive regulation of interferon-beta production;GO:0032648 regulation of interferon-beta production		Predicted intracellular proteins; RNA polymerase related proteins	Nucleoplasm (Enhanced)		(M66)PID MYC ACTIV PATHWAY		1.0	0.0	0.0	0.0	0.0	0.0	0.0	0.0	0.0	0.0	0.0	0.0	0.0	0.0	0.0	0.0	0.0	0.0	0.0	0.0
TP53BP2	7159	symbol	H. sapiens	7159	H. sapiens	TP53BP2	tumor protein p53 binding protein 2	GO:1900119 positive regulation of execution phase of apoptosis;GO:1900117 regulation of execution phase of apoptosis;GO:0072332 intrinsic apoptotic signaling pathway by p53 class mediator		Predicted intracellular proteins; Cancer-related genes:Candidate cancer biomarkers	Cell Junctions;Cytosol (Enhanced)		(M145)PID P53 DOWNSTREAM PATHWAY		0.0	0.0	0.0	0.0	1.0	0.0	0.0	0.0	0.0	1.0	0.0	0.0	0.0	0.0	0.0	0.0	0.0	0.0	0.0	0.0
CDKN2A	1029	symbol	H. sapiens	1029	H. sapiens	CDKN2A	cyclin dependent kinase inhibitor 2A	GO:2000111 positive regulation of macrophage apoptotic process;GO:0033034 positive regulation of myeloid cell apoptotic process;GO:2000109 regulation of macrophage apoptotic process		Human disease related genes:Cancers:Cancers of the digestive system; Human disease related genes:Cancers:Head and neck cancers; Cancer-related genes:Mutated cancer genes; Cancer-related genes:Candidate cancer biomarkers; Human disease related genes:Cancers:Cancers of soft tissues and bone; Human disease related genes:Cancers:Cancers of eye, brain, and central nervous system; Human disease related…	Nucleoli (Supported)		(M3686)SA REG CASCADE OF CYCLIN EXPR; (M1529)SA G1 AND S PHASES; (M180)PID HIF1A PATHWAY	(M5925)HALLMARK E2F TARGETS; (M5939)HALLMARK P53 PATHWAY; (M5950)HALLMARK ALLOGRAFT REJECTION	1.0	0.0	0.0	0.0	1.0	1.0	0.0	0.0	1.0	0.0	0.0	0.0	0.0	0.0	0.0	1.0	0.0	0.0	0.0	1.0
RELL1	768211	symbol	H. sapiens	768211	H. sapiens	RELL1	RELT like 1	GO:1900745 positive regulation of p38MAPK cascade;GO:1900744 regulation of p38MAPK cascade;GO:0032874 positive regulation of stress-activated MAPK cascade			Microtubules;Plasma membrane (Supported)				0.0	0.0	0.0	0.0	0.0	0.0	0.0	0.0	0.0	0.0	0.0	0.0	0.0	0.0	0.0	0.0	0.0	0.0	0.0	0.0
CD93	22918	symbol	H. sapiens	22918	H. sapiens	CD93	CD93 molecule	GO:0042116 macrophage activation;GO:0002274 myeloid leukocyte activation;GO:0006909 phagocytosis		CD markers	Plasma membrane;Vesicles (Approved)				0.0	0.0	0.0	0.0	0.0	0.0	0.0	0.0	0.0	0.0	0.0	0.0	0.0	0.0	1.0	0.0	0.0	0.0	0.0	0.0
PTGES	9536	symbol	H. sapiens	9536	H. sapiens	PTGES	prostaglandin E synthase	GO:0031620 regulation of fever generation;GO:0031650 regulation of heat generation;GO:0032306 regulation of prostaglandin secretion		Enzymes; ENZYME proteins:Isomerase; ENZYME proteins:Transferases	Endoplasmic reticulum (Supported)			(M5906)HALLMARK ESTROGEN RESPONSE EARLY; (M5907)HALLMARK ESTROGEN RESPONSE LATE; (M5934)HALLMARK XENOBIOTIC METABOLISM	0.0	0.0	0.0	0.0	0.0	0.0	0.0	0.0	0.0	0.0	0.0	0.0	0.0	0.0	0.0	0.0	0.0	0.0	1.0	0.0
CCND2	894	symbol	H. sapiens	894	H. sapiens	CCND2	cyclin D2	GO:0045737 positive regulation of cyclin-dependent protein serine/threonine kinase activity;GO:1904031 positive regulation of cyclin-dependent protein kinase activity;GO:1900087 positive regulation of G1/S transition of mitotic cell cycle		Cancer-related genes:Candidate cancer biomarkers; Human disease related genes:Cancers:Cancers of male genital organs; Human disease related genes:Congenital malformations:Other congenital malformations; Disease related genes; Predicted intracellular proteins	Nucleoplasm (Enhanced)		(M234)PID IL2 STAT5 PATHWAY; (M279)PID RB 1PATHWAY; (M66)PID MYC ACTIV PATHWAY	(M5944)HALLMARK ANGIOGENESIS; (M5895)HALLMARK WNT BETA CATENIN SIGNALING; (M5902)HALLMARK APOPTOSIS	1.0	0.0	1.0	0.0	0.0	1.0	0.0	0.0	1.0	1.0	0.0	0.0	1.0	0.0	0.0	1.0	1.0	0.0	0.0	0.0
LY6K	54742	symbol	H. sapiens	54742	H. sapiens	LY6K	lymphocyte antigen 6 family member K	GO:0007339 binding of sperm to zona pellucida;GO:0035036 sperm-egg recognition;GO:0009988 cell-cell recognition		Predicted secreted proteins	Plasma membrane (Approved); Additional: Nucleoplasm				0.0	0.0	0.0	0.0	0.0	0.0	0.0	0.0	0.0	0.0	0.0	0.0	0.0	0.0	0.0	0.0	0.0	0.0	0.0	0.0
RNFT2	84900	symbol	H. sapiens	84900	H. sapiens	RNFT2	ring finger protein, transmembrane 2	GO:1904294 positive regulation of ERAD pathway;GO:1904292 regulation of ERAD pathway;GO:1905898 positive regulation of response to endoplasmic reticulum stress		Predicted intracellular proteins	Nucleoplasm (Approved); Additional: Cytosol				0.0	0.0	0.0	0.0	0.0	0.0	0.0	0.0	0.0	0.0	0.0	0.0	0.0	0.0	0.0	0.0	0.0	0.0	0.0	0.0
GPR162	27239	symbol	H. sapiens	27239	H. sapiens	GPR162	G protein-coupled receptor 162	GO:0007186 G protein-coupled receptor signaling pathway;GO:0007165 signal transduction;GO:0023052 signaling		G-protein coupled receptors:GPCRs excl olfactory receptors; Predicted intracellular proteins	Centriolar satellite (Approved)				0.0	0.0	0.0	0.0	0.0	0.0	0.0	0.0	0.0	0.0	0.0	0.0	0.0	0.0	0.0	0.0	0.0	0.0	0.0	0.0
VPS37D	155382	symbol	H. sapiens	155382	H. sapiens	VPS37D	VPS37D subunit of ESCRT-I	GO:0039702 viral budding via host ESCRT complex;GO:0046755 viral budding;GO:0036258 multivesicular body assembly		Human disease related genes:Other congenital disorders:Chromosomal abnormalities; Predicted intracellular proteins; Disease related genes	Vesicles (Approved)			(M5898)HALLMARK DNA REPAIR	1.0	0.0	0.0	0.0	0.0	0.0	0.0	0.0	0.0	0.0	0.0	0.0	0.0	0.0	0.0	0.0	0.0	0.0	0.0	0.0
JUNB	3726	symbol	H. sapiens	3726	H. sapiens	JUNB	JunB proto-oncogene, AP-1 transcription factor subunit	GO:0033687 osteoblast proliferation;GO:0060136 embryonic process involved in female pregnancy;GO:0001829 trophectodermal cell differentiation		Human disease related genes:Cancers:Cancers of haematopoietic and lymphoid tissues; Transcription factors:Basic domains; Predicted intracellular proteins; Human disease related genes:Cancers:Skin cancers	Nucleoplasm (Supported)		(M235)PID TCR CALCIUM PATHWAY; (M65)PID FRA PATHWAY; (M60)PID NFAT TFPATHWAY	(M5938)HALLMARK REACTIVE OXYGEN SPECIES PATHWAY; (M5896)HALLMARK TGF BETA SIGNALING; (M5941)HALLMARK UV RESPONSE UP	0.0	0.0	1.0	0.0	0.0	0.0	0.0	0.0	1.0	0.0	0.0	1.0	0.0	0.0	1.0	0.0	0.0	1.0	0.0	0.0
ARHGEF18	23370	symbol	H. sapiens	23370	H. sapiens	ARHGEF18	Rho/Rac guanine nucleotide exchange factor 18	GO:0150105 protein localization to cell-cell junction;GO:0051497 negative regulation of stress fiber assembly;GO:0032232 negative regulation of actin filament bundle assembly		Human disease related genes:Nervous system diseases:Eye disease; Predicted intracellular proteins; Disease related genes	Cytosol (Enhanced)		(M68)PID RHOA REG PATHWAY		1.0	0.0	0.0	0.0	0.0	0.0	0.0	0.0	0.0	0.0	0.0	0.0	0.0	1.0	0.0	0.0	0.0	0.0	0.0	0.0
CDHR5	53841	symbol	H. sapiens	53841	H. sapiens	CDHR5	cadherin related family member 5	GO:0090675 intermicrovillar adhesion;GO:1904970 brush border assembly;GO:0032532 regulation of microvillus length		Predicted intracellular proteins					0.0	0.0	0.0	0.0	0.0	0.0	0.0	0.0	0.0	0.0	0.0	0.0	0.0	0.0	0.0	0.0	0.0	0.0	0.0	1.0
CXCL8	3576	symbol	H. sapiens	3576	H. sapiens	CXCL8	C-X-C motif chemokine ligand 8	GO:2000535 regulation of entry of bacterium into host cell;GO:0050930 induction of positive chemotaxis;GO:0060354 negative regulation of cell adhesion molecule production		Predicted secreted proteins; Candidate cardiovascular disease genes; Cancer-related genes:Candidate cancer biomarkers	Golgi apparatus (Approved)	ABT-510; MDX-018; Rivanicline; Tapinarof	(M251)PID SYNDECAN 3 PATHWAY; (M252)PID IL8 CXCR1 PATHWAY; (M240)PID SYNDECAN 2 PATHWAY	(M5930)HALLMARK EPITHELIAL MESENCHYMAL TRANSITION; (M5932)HALLMARK INFLAMMATORY RESPONSE	1.0	0.0	1.0	0.0	0.0	1.0	1.0	1.0	0.0	0.0	0.0	0.0	0.0	0.0	1.0	0.0	0.0	1.0	0.0	0.0
FBXO2	26232	symbol	H. sapiens	26232	H. sapiens	FBXO2	F-box protein 2	GO:0006516 glycoprotein catabolic process;GO:0031146 SCF-dependent proteasomal ubiquitin-dependent protein catabolic process;GO:0030433 ubiquitin-dependent ERAD pathway		Predicted intracellular proteins	Cytosol;Nucleoplasm (Approved)				0.0	0.0	0.0	0.0	0.0	0.0	0.0	0.0	0.0	0.0	0.0	0.0	0.0	0.0	0.0	0.0	0.0	0.0	0.0	0.0
MB21D1	115004	gene_synonym	H. sapiens	115004	H. sapiens	CGAS	cyclic GMP-AMP synthase	GO:0038001 paracrine signaling;GO:0010753 positive regulation of cGMP-mediated signaling;GO:0043950 positive regulation of cAMP-mediated signaling		Enzymes; Predicted intracellular proteins; ENZYME proteins:Transferases	Nucleoplasm (Supported)				0.0	0.0	1.0	0.0	1.0	0.0	0.0	1.0	0.0	0.0	0.0	0.0	0.0	0.0	0.0	0.0	0.0	0.0	0.0	0.0
NAT14	57106	symbol	H. sapiens	57106	H. sapiens	NAT14	N-acetyltransferase 14 (putative)	GO:0006352 DNA-templated transcription, initiation;GO:0006351 transcription, DNA-templated;GO:0097659 nucleic acid-templated transcription		Predicted intracellular proteins	Mitochondria (Approved)				1.0	0.0	0.0	0.0	0.0	0.0	0.0	0.0	0.0	0.0	0.0	0.0	0.0	0.0	0.0	0.0	0.0	0.0	0.0	0.0
SCG2	7857	symbol	H. sapiens	7857	H. sapiens	SCG2	secretogranin II	GO:0050930 induction of positive chemotaxis;GO:0048245 eosinophil chemotaxis;GO:0072677 eosinophil migration		Predicted secreted proteins	Golgi apparatus (Approved); Additional: Vesicles			(M5919)HALLMARK HEDGEHOG SIGNALING; (M5930)HALLMARK EPITHELIAL MESENCHYMAL TRANSITION	0.0	0.0	0.0	0.0	0.0	0.0	1.0	0.0	0.0	0.0	0.0	0.0	0.0	0.0	0.0	0.0	0.0	1.0	0.0	0.0
LOC100287042	100287042	Gene_ID	H. sapiens	100287042	H. sapiens	MIF4GD-DT	MIF4GD divergent transcript								0.0	0.0	0.0	0.0	0.0	0.0	0.0	0.0	0.0	0.0	0.0	0.0	0.0	0.0	0.0	0.0	0.0	0.0	0.0	0.0
EIF3G	8666	symbol	H. sapiens	8666	H. sapiens	EIF3G	eukaryotic translation initiation factor 3 subunit G	GO:0075525 viral translational termination-reinitiation;GO:0019081 viral translation;GO:0019080 viral gene expression		Predicted intracellular proteins	Cytosol (Enhanced)				0.0	0.0	0.0	0.0	0.0	0.0	0.0	1.0	0.0	0.0	0.0	0.0	0.0	0.0	0.0	0.0	0.0	0.0	0.0	0.0
QSOX1	5768	symbol	H. sapiens	5768	H. sapiens	QSOX1	quiescin sulfhydryl oxidase 1	GO:0085029 extracellular matrix assembly;GO:0016242 negative regulation of macroautophagy;GO:0010507 negative regulation of autophagy		Enzymes; Predicted secreted proteins; Predicted intracellular proteins; ENZYME proteins:Oxidoreductases	Golgi apparatus (Supported); Additional: Vesicles			(M5930)HALLMARK EPITHELIAL MESENCHYMAL TRANSITION; (M5937)HALLMARK GLYCOLYSIS	0.0	0.0	1.0	0.0	0.0	0.0	0.0	0.0	0.0	0.0	0.0	0.0	0.0	0.0	0.0	0.0	0.0	0.0	0.0	0.0
CTNND1	1500	symbol	H. sapiens	1500	H. sapiens	CTNND1	catenin delta 1	GO:0044331 cell-cell adhesion mediated by cadherin;GO:0099072 regulation of postsynaptic membrane neurotransmitter receptor levels;GO:0007043 cell-cell junction assembly		Transporters:Accessory Factors Involved in Transport; Cancer-related genes:Mutational cancer driver genes; Human disease related genes:Congenital malformations:Congenital malformations of skin; Disease related genes; Potential drug targets; Predicted intracellular proteins	Plasma membrane (Enhanced)		(M184)PID ECADHERIN KERATINOCYTE PATHWAY; (M266)PID NCADHERIN PATHWAY; (M156)PID ECADHERIN NASCENT AJ PATHWAY	(M5915)HALLMARK APICAL JUNCTION	0.0	0.0	0.0	0.0	0.0	0.0	0.0	0.0	1.0	1.0	0.0	0.0	0.0	0.0	0.0	0.0	0.0	0.0	0.0	0.0
ARVCF	421	symbol	H. sapiens	421	H. sapiens	ARVCF	ARVCF delta catenin family member	GO:0016339 calcium-dependent cell-cell adhesion via plasma membrane cell adhesion molecules;GO:0007043 cell-cell junction assembly;GO:0045216 cell-cell junction organization		Predicted intracellular proteins	Cell Junctions;Plasma membrane (Enhanced)				0.0	0.0	0.0	0.0	0.0	0.0	0.0	0.0	0.0	0.0	0.0	0.0	0.0	0.0	0.0	0.0	0.0	0.0	0.0	0.0
PRRT3	285368	symbol	H. sapiens	285368	H. sapiens	PRRT3	proline rich transmembrane protein 3			Predicted intracellular proteins	Plasma membrane (Approved); Additional: Nucleoplasm				0.0	0.0	0.0	0.0	0.0	0.0	0.0	0.0	0.0	0.0	0.0	0.0	0.0	0.0	0.0	0.0	0.0	0.0	0.0	0.0
GTF2H2B	653238	symbol	H. sapiens	653238	H. sapiens	GTF2H2B	general transcription factor IIH subunit 2B (pseudogene)								0.0	0.0	0.0	0.0	0.0	0.0	0.0	0.0	0.0	0.0	0.0	0.0	0.0	0.0	0.0	0.0	0.0	0.0	0.0	0.0
NDUFA6	4700	symbol	H. sapiens	4700	H. sapiens	NDUFA6	NADH:ubiquinone oxidoreductase subunit A6	GO:0006120 mitochondrial electron transport, NADH to ubiquinone;GO:0010257 NADH dehydrogenase complex assembly;GO:0032981 mitochondrial respiratory chain complex I assembly		Predicted intracellular proteins; Disease related genes; Human disease related genes:Congenital disorders of metabolism:Mitochondrial diseases		NADH		(M5938)HALLMARK REACTIVE OXYGEN SPECIES PATHWAY; (M5936)HALLMARK OXIDATIVE PHOSPHORYLATION	0.0	0.0	0.0	0.0	0.0	0.0	0.0	0.0	0.0	0.0	0.0	0.0	0.0	0.0	0.0	0.0	0.0	0.0	0.0	0.0
NTRK1	4914	symbol	H. sapiens	4914	H. sapiens	NTRK1	neurotrophic receptor tyrosine kinase 1	GO:0061366 behavioral response to chemical pain;GO:0061368 behavioral response to formalin induced pain;GO:0021553 olfactory nerve development	Tyr protein kinase family	FDA approved drug targets:Small molecule drugs; Cancer-related genes:Candidate cancer biomarkers; Human disease related genes:Cancers:Cancers of eye, brain, and central nervous system; Human disease related genes:Cancers:Cancers of endocrine organs; Human disease related genes:Nervous system diseases:Other nervous and sensory system diseases; Kinases:Tyr protein kinases; Disease related genes; En…	Cytosol;Vesicles (Approved)	Amitriptyline; Imatinib; Regorafenib; Entrectinib; Fostamatinib; Cenegermin; Larotrectinib	(M18895)SA TRKA RECEPTOR; (M271)PID PI3K PLC TRK PATHWAY; (M100)PID SHP2 PATHWAY		0.0	0.0	1.0	0.0	0.0	1.0	1.0	0.0	1.0	0.0	0.0	0.0	0.0	1.0	1.0	1.0	0.0	0.0	0.0	0.0
SRSF9	8683	symbol	H. sapiens	8683	H. sapiens	SRSF9	serine and arginine rich splicing factor 9	GO:0048025 negative regulation of mRNA splicing, via spliceosome;GO:0000380 alternative mRNA splicing, via spliceosome;GO:0033119 negative regulation of RNA splicing		Predicted intracellular proteins	Nucleoplasm (Supported); Additional: Nucleoli				0.0	0.0	0.0	0.0	0.0	0.0	0.0	0.0	0.0	0.0	0.0	0.0	0.0	0.0	0.0	0.0	0.0	0.0	0.0	0.0
BOLA3-AS1	100507171	gene_synonym	H. sapiens	100507171	H. sapiens	BOLA3-DT	BOLA3 divergent transcript								0.0	0.0	0.0	0.0	0.0	0.0	0.0	0.0	0.0	0.0	0.0	0.0	0.0	0.0	0.0	0.0	0.0	0.0	0.0	0.0
GFER	2671	symbol	H. sapiens	2671	H. sapiens	GFER	growth factor, augmenter of liver regeneration	GO:0072717 cellular response to actinomycin D;GO:0072716 response to actinomycin D;GO:0071236 cellular response to antibiotic		ENZYME proteins:Oxidoreductases; Predicted secreted proteins; Disease related genes; Potential drug targets; Enzymes; Predicted intracellular proteins	Cytosol;Mitochondria (Enhanced)	Flavin adenine dinucleotide			0.0	0.0	0.0	0.0	0.0	0.0	0.0	0.0	0.0	0.0	0.0	0.0	0.0	0.0	0.0	0.0	0.0	0.0	0.0	0.0
LOC101929427	101929427	Gene_ID	H. sapiens	101929427	H. sapiens	LOC101929427	uncharacterized LOC101929427								0.0	0.0	0.0	0.0	0.0	0.0	0.0	0.0	0.0	0.0	0.0	0.0	0.0	0.0	0.0	0.0	0.0	0.0	0.0	0.0
APOA1BP	128240	gene_synonym	H. sapiens	128240	H. sapiens	NAXE	NAD(P)HX epimerase	GO:0031580 membrane raft distribution;GO:0051665 membrane raft localization;GO:0031579 membrane raft organization		Predicted secreted proteins; Disease related genes; Potential drug targets; Enzymes; ENZYME proteins:Isomerase; Human disease related genes:Nervous system diseases:Neurodegenerative diseases	Nucleoplasm (Approved); Additional: Cytosol;Vesicles				0.0	0.0	0.0	0.0	0.0	0.0	0.0	0.0	0.0	0.0	0.0	0.0	0.0	0.0	0.0	0.0	0.0	1.0	0.0	0.0
HIC1	3090	symbol	H. sapiens	3090	H. sapiens	HIC1	HIC ZBTB transcriptional repressor 1	GO:0043517 positive regulation of DNA damage response, signal transduction by p53 class mediator;GO:1901798 positive regulation of signal transduction by p53 class mediator;GO:0043516 regulation of DNA damage response, signal transduction by p53 class mediator		Predicted intracellular proteins; Transcription factors:Zinc-coordinating DNA-binding domains			(M40)PID E2F PATHWAY; (M145)PID P53 DOWNSTREAM PATHWAY		1.0	0.0	0.0	0.0	0.0	0.0	0.0	0.0	0.0	1.0	0.0	0.0	0.0	0.0	0.0	0.0	0.0	0.0	0.0	0.0
WTIP	126374	symbol	H. sapiens	126374	H. sapiens	WTIP	WT1 interacting protein	GO:0035331 negative regulation of hippo signaling;GO:0035330 regulation of hippo signaling;GO:2000637 positive regulation of gene silencing by miRNA		Predicted intracellular proteins					1.0	0.0	0.0	0.0	0.0	0.0	0.0	0.0	0.0	1.0	0.0	0.0	0.0	0.0	0.0	0.0	0.0	0.0	0.0	0.0
NABP2	79035	symbol	H. sapiens	79035	H. sapiens	NABP2	nucleic acid binding protein 2	GO:0070200 establishment of protein localization to telomere;GO:0070199 establishment of protein localization to chromosome;GO:0070198 protein localization to chromosome, telomeric region		Predicted intracellular proteins	Nucleoplasm (Enhanced)				0.0	0.0	0.0	0.0	0.0	0.0	0.0	0.0	0.0	0.0	0.0	0.0	0.0	0.0	0.0	0.0	0.0	0.0	0.0	0.0
TLE4	7091	symbol	H. sapiens	7091	H. sapiens	TLE4	TLE family member 4, transcriptional corepressor	GO:1990830 cellular response to leukemia inhibitory factor;GO:1990823 response to leukemia inhibitory factor;GO:0090090 negative regulation of canonical Wnt signaling pathway		Predicted intracellular proteins	Nucleoplasm (Supported)		(M223)PID BETA CATENIN NUC PATHWAY	(M5951)HALLMARK SPERMATOGENESIS	1.0	0.0	0.0	0.0	0.0	0.0	0.0	0.0	0.0	1.0	0.0	0.0	0.0	0.0	0.0	0.0	0.0	0.0	0.0	0.0
VWA1	64856	symbol	H. sapiens	64856	H. sapiens	VWA1	von Willebrand factor A domain containing 1	GO:0048266 behavioral response to pain;GO:0048265 response to pain;GO:0033555 multicellular organismal response to stress		Predicted secreted proteins; Predicted intracellular proteins			(M3008)NABA ECM GLYCOPROTEINS; (M5884)NABA CORE MATRISOME; (M5889)NABA MATRISOME		0.0	0.0	0.0	0.0	0.0	0.0	0.0	0.0	0.0	0.0	0.0	0.0	1.0	0.0	0.0	0.0	0.0	0.0	0.0	0.0
MIR4466	100616154	symbol	H. sapiens	100616154	H. sapiens	MIR4466	microRNA 4466								0.0	0.0	0.0	0.0	0.0	0.0	0.0	0.0	0.0	0.0	0.0	0.0	0.0	0.0	0.0	0.0	0.0	0.0	0.0	0.0
SOX2	6657	symbol	H. sapiens	6657	H. sapiens	SOX2	SRY-box transcription factor 2	GO:0001714 endodermal cell fate specification;GO:0021781 glial cell fate commitment;GO:0001711 endodermal cell fate commitment		Human disease related genes:Congenital malformations:Congenital malformations of eye; Human disease related genes:Congenital malformations:Congenital malformations of the nervous system; Disease related genes; Transcription factors:Other all-alpha-helical DNA-binding domains; Predicted intracellular proteins; Cancer-related genes	Nucleoplasm (Enhanced)				1.0	0.0	1.0	0.0	0.0	0.0	0.0	0.0	0.0	1.0	0.0	1.0	0.0	1.0	0.0	0.0	0.0	0.0	0.0	0.0
ZNF730	100129543	symbol	H. sapiens	100129543	H. sapiens	ZNF730	zinc finger protein 730	GO:0006357 regulation of transcription by RNA polymerase II;GO:0006355 regulation of transcription, DNA-templated;GO:1903506 regulation of nucleic acid-templated transcription		Predicted intracellular proteins; Transcription factors:Zinc-coordinating DNA-binding domains					0.0	0.0	0.0	0.0	0.0	0.0	0.0	0.0	0.0	0.0	0.0	0.0	0.0	0.0	0.0	0.0	0.0	0.0	0.0	0.0
OR1N1	138883	symbol	H. sapiens	138883	H. sapiens	OR1N1	olfactory receptor family 1 subfamily N member 1	GO:0050911 detection of chemical stimulus involved in sensory perception of smell;GO:0007608 sensory perception of smell;GO:0050907 detection of chemical stimulus involved in sensory perception		G-protein coupled receptors:Odorant/olfactory and gustatory receptors					0.0	0.0	0.0	0.0	0.0	0.0	0.0	0.0	0.0	0.0	0.0	0.0	0.0	0.0	0.0	0.0	0.0	0.0	0.0	0.0
TPBGL	100507050	symbol	H. sapiens	100507050	H. sapiens	TPBGL	trophoblast glycoprotein like	GO:0090090 negative regulation of canonical Wnt signaling pathway;GO:0030178 negative regulation of Wnt signaling pathway;GO:0060828 regulation of canonical Wnt signaling pathway							0.0	0.0	0.0	0.0	0.0	0.0	0.0	0.0	0.0	1.0	0.0	0.0	0.0	0.0	0.0	0.0	0.0	0.0	0.0	0.0
QRICH2	84074	symbol	H. sapiens	84074	H. sapiens	QRICH2	glutamine rich 2	GO:2000059 negative regulation of ubiquitin-dependent protein catabolic process;GO:1903051 negative regulation of proteolysis involved in cellular protein catabolic process;GO:1903363 negative regulation of cellular protein catabolic process		Predicted intracellular proteins; Disease related genes; Human disease related genes:Reproductive system diseases:Reproductive system diseases	Nuclear membrane;Nucleoplasm;Vesicles (Approved)				0.0	0.0	0.0	0.0	0.0	0.0	0.0	0.0	0.0	0.0	0.0	0.0	0.0	0.0	0.0	0.0	0.0	0.0	0.0	0.0
TSEN54	283989	symbol	H. sapiens	283989	H. sapiens	TSEN54	tRNA splicing endonuclease subunit 54	GO:0000379 tRNA-type intron splice site recognition and cleavage;GO:0006388 tRNA splicing, via endonucleolytic cleavage and ligation;GO:0000394 RNA splicing, via endonucleolytic cleavage and ligation		Human disease related genes:Congenital malformations:Congenital malformations of the nervous system; Predicted intracellular proteins; Disease related genes	Nucleoplasm (Approved)				0.0	0.0	0.0	0.0	0.0	0.0	0.0	0.0	0.0	0.0	0.0	0.0	0.0	0.0	0.0	0.0	0.0	0.0	0.0	0.0
SNORD46	94161	symbol	H. sapiens	94161	H. sapiens	SNORD46	small nucleolar RNA, C/D box 46	GO:0006396 RNA processing;GO:0016070 RNA metabolic process;GO:0010467 gene expression							0.0	0.0	0.0	0.0	0.0	0.0	0.0	0.0	0.0	0.0	0.0	0.0	0.0	0.0	0.0	0.0	0.0	0.0	0.0	0.0
BMI1	648	symbol	H. sapiens	648	H. sapiens	BMI1	BMI1 proto-oncogene, polycomb ring finger	GO:0036353 histone H2A-K119 monoubiquitination;GO:0007379 segment specification;GO:0035518 histone H2A monoubiquitination		Human disease related genes:Cancers:Cancers of male genital organs; Predicted intracellular proteins; Cancer-related genes:Candidate cancer biomarkers	Nuclear bodies;Nucleoplasm (Approved); Additional: Cytosol;Nucleoli		(M66)PID MYC ACTIV PATHWAY		1.0	0.0	1.0	0.0	0.0	0.0	0.0	0.0	1.0	0.0	1.0	0.0	0.0	0.0	1.0	1.0	0.0	0.0	0.0	0.0
WASH2P	375260	symbol	H. sapiens	375260	H. sapiens	WASH2P	WASP family homolog 2, pseudogene								0.0	0.0	0.0	0.0	0.0	0.0	0.0	0.0	0.0	0.0	0.0	0.0	0.0	0.0	0.0	0.0	0.0	0.0	0.0	0.0
HIPK2	28996	symbol	H. sapiens	28996	H. sapiens	HIPK2	homeodomain interacting protein kinase 2	GO:0060235 lens induction in camera-type eye;GO:0060059 embryonic retina morphogenesis in camera-type eye;GO:0030578 PML body organization	CMGC Ser/Thr protein kinase family	Enzymes; Kinases:CMGC Ser/Thr protein kinases; ENZYME proteins:Transferases	Nucleoplasm (Supported)	Fostamatinib	(M261)PID P53 REGULATION PATHWAY; (M195)PID CMYB PATHWAY	(M5896)HALLMARK TGF BETA SIGNALING; (M5947)HALLMARK IL2 STAT5 SIGNALING	1.0	0.0	0.0	0.0	0.0	0.0	0.0	0.0	1.0	0.0	1.0	0.0	0.0	0.0	1.0	1.0	0.0	0.0	0.0	0.0
BEGAIN	57596	symbol	H. sapiens	57596	H. sapiens	BEGAIN	brain enriched guanylate kinase associated	GO:0098962 regulation of postsynaptic neurotransmitter receptor activity;GO:0099601 regulation of neurotransmitter receptor activity;GO:0031644 regulation of nervous system process		Predicted intracellular proteins	Nucleoplasm (Approved); Additional: Cytosol;Golgi apparatus				0.0	0.0	0.0	0.0	0.0	0.0	0.0	0.0	0.0	0.0	0.0	0.0	0.0	0.0	0.0	0.0	0.0	0.0	1.0	0.0
APC2	10297	symbol	H. sapiens	10297	H. sapiens	APC2	APC regulator of WNT signaling pathway 2	GO:0007026 negative regulation of microtubule depolymerization;GO:0031114 regulation of microtubule depolymerization;GO:0031111 negative regulation of microtubule polymerization or depolymerization		Human disease related genes:Cancers:Cancers of the digestive system; Human disease related genes:Congenital malformations:Congenital malformations of the nervous system; Human disease related genes:Cancers:Cancers of eye, brain, and central nervous system; Human disease related genes:Congenital malformations:Other congenital malformations; Disease related genes; Predicted intracellular proteins	Cytokinetic bridge;Midbody (Supported); Additional: Cytosol				0.0	0.0	0.0	0.0	0.0	1.0	0.0	0.0	0.0	1.0	0.0	0.0	0.0	0.0	0.0	0.0	0.0	0.0	0.0	0.0
BMP4	652	symbol	H. sapiens	652	H. sapiens	BMP4	bone morphogenetic protein 4	GO:0048390 intermediate mesoderm morphogenesis;GO:0048391 intermediate mesoderm formation;GO:0048392 intermediate mesodermal cell differentiation		Human disease related genes:Congenital malformations:Congenital malformations of eye; Cancer-related genes:Candidate cancer biomarkers; Predicted secreted proteins; Disease related genes; Human disease related genes:Congenital malformations:Congenital malformations of face and neck; Predicted intracellular proteins		Calcium	(M181)PID BMP PATHWAY; (M5883)NABA SECRETED FACTORS; (M5885)NABA MATRISOME ASSOCIATED		1.0	0.0	0.0	0.0	0.0	1.0	1.0	0.0	1.0	1.0	0.0	1.0	1.0	0.0	1.0	1.0	1.0	1.0	0.0	1.0
P3H2	55214	symbol	H. sapiens	55214	H. sapiens	P3H2	prolyl 3-hydroxylase 2	GO:0019511 peptidyl-proline hydroxylation;GO:0018126 protein hydroxylation;GO:0032963 collagen metabolic process		ENZYME proteins:Oxidoreductases; Human disease related genes:Nervous system diseases:Eye disease; Disease related genes; Potential drug targets; Enzymes; Predicted intracellular proteins	Golgi apparatus (Supported); Additional: Cytosol;Nucleoplasm;Vesicles	Ascorbic acid; Proline	(M3468)NABA ECM REGULATORS; (M5885)NABA MATRISOME ASSOCIATED; (M5889)NABA MATRISOME		0.0	0.0	0.0	0.0	0.0	0.0	0.0	0.0	0.0	0.0	0.0	0.0	1.0	0.0	0.0	0.0	0.0	0.0	0.0	0.0
SLC35F3	148641	symbol	H. sapiens	148641	H. sapiens	SLC35F3	solute carrier family 35 member F3	GO:0015888 thiamine transport;GO:0015695 organic cation transport;GO:0051180 vitamin transport		Transporters:Electrochemical Potential-driven transporters	Golgi apparatus (Approved); Additional: Nucleoli				0.0	0.0	0.0	0.0	0.0	0.0	0.0	0.0	0.0	0.0	0.0	0.0	0.0	0.0	0.0	0.0	0.0	0.0	0.0	0.0
NTN4	59277	symbol	H. sapiens	59277	H. sapiens	NTN4	netrin 4	GO:0060668 regulation of branching involved in salivary gland morphogenesis by extracellular matrix-epithelial cell signaling;GO:0035426 extracellular matrix-cell signaling;GO:0060693 regulation of branching involved in salivary gland morphogenesis		Predicted intracellular proteins; Predicted secreted proteins; Cancer-related genes:Mutated cancer genes			(M5887)NABA BASEMENT MEMBRANES; (M3008)NABA ECM GLYCOPROTEINS; (M5884)NABA CORE MATRISOME		0.0	0.0	0.0	0.0	0.0	0.0	1.0	1.0	0.0	0.0	0.0	0.0	1.0	0.0	0.0	0.0	1.0	0.0	0.0	0.0
PLEKHG6	55200	symbol	H. sapiens	55200	H. sapiens	PLEKHG6	pleckstrin homology and RhoGEF domain containing G6	GO:0051056 regulation of small GTPase mediated signal transduction;GO:1902531 regulation of intracellular signal transduction;GO:0050790 regulation of catalytic activity		Predicted intracellular proteins	Cell Junctions (Supported); Additional: Centrosome		(M68)PID RHOA REG PATHWAY		1.0	0.0	0.0	0.0	0.0	0.0	0.0	0.0	0.0	0.0	0.0	0.0	0.0	1.0	0.0	0.0	0.0	0.0	0.0	0.0
ANOS1	3730	symbol	H. sapiens	3730	H. sapiens	ANOS1	anosmin 1	GO:0007411 axon guidance;GO:0097485 neuron projection guidance;GO:0010951 negative regulation of endopeptidase activity		Human disease related genes:Endocrine and metabolic diseases:Hypothalamus and pituitary gland diseases; Predicted secreted proteins; Disease related genes			(M3008)NABA ECM GLYCOPROTEINS; (M5884)NABA CORE MATRISOME; (M5889)NABA MATRISOME		0.0	0.0	0.0	0.0	0.0	0.0	1.0	0.0	1.0	0.0	0.0	0.0	1.0	0.0	0.0	0.0	0.0	0.0	0.0	0.0
SH3BP1	23616	symbol	H. sapiens	23616	H. sapiens	SH3BP1	SH3 domain binding protein 1	GO:0045198 establishment of epithelial cell apical/basal polarity;GO:0035020 regulation of Rac protein signal transduction;GO:0030859 polarized epithelial cell differentiation		Predicted intracellular proteins	Cytosol (Approved)				1.0	0.0	0.0	0.0	0.0	0.0	0.0	0.0	0.0	0.0	0.0	0.0	0.0	1.0	0.0	0.0	0.0	0.0	0.0	1.0
MEX3A	92312	symbol	H. sapiens	92312	H. sapiens	MEX3A	mex-3 RNA binding family member A			Predicted intracellular proteins	Cytosol (Supported)				0.0	0.0	0.0	0.0	0.0	0.0	0.0	0.0	0.0	0.0	0.0	0.0	0.0	0.0	0.0	0.0	0.0	0.0	0.0	0.0
FLJ42393	401105	symbol	H. sapiens	401105	H. sapiens	FLJ42393	uncharacterized LOC401105								0.0	0.0	0.0	0.0	0.0	0.0	0.0	0.0	0.0	0.0	0.0	0.0	0.0	0.0	0.0	0.0	0.0	0.0	0.0	0.0
FEM1A	55527	symbol	H. sapiens	55527	H. sapiens	FEM1A	fem-1 homolog A	GO:0140627 ubiquitin-dependent protein catabolic process via the C-end degron rule pathway;GO:0051438 regulation of ubiquitin-protein transferase activity;GO:0050729 positive regulation of inflammatory response		Predicted intracellular proteins	Golgi apparatus;Nucleoplasm (Supported); Additional: Cytosol				0.0	0.0	0.0	0.0	0.0	0.0	0.0	0.0	0.0	0.0	0.0	0.0	0.0	0.0	0.0	0.0	0.0	0.0	0.0	0.0
LDLR	3949	symbol	H. sapiens	3949	H. sapiens	LDLR	low density lipoprotein receptor	GO:0010899 regulation of phosphatidylcholine catabolic process;GO:0061771 response to caloric restriction;GO:0090118 receptor-mediated endocytosis involved in cholesterol transport		Human disease related genes:Cardiovascular diseases:Vascular diseases; Human disease related genes:Endocrine and metabolic diseases:Other endocrine and metabolic diseases; Human disease related genes:Congenital disorders of metabolism:Congenital disorders of lipid/glycolipid metabolism; Disease related genes; Predicted intracellular proteins; Human disease related genes:Congenital disorders of me…		Porfimer sodium		(M5892)HALLMARK CHOLESTEROL HOMEOSTASIS; (M5942)HALLMARK UV RESPONSE DN; (M5890)HALLMARK TNFA SIGNALING VIA NFKB	1.0	0.0	0.0	0.0	0.0	0.0	1.0	0.0	0.0	1.0	0.0	0.0	0.0	0.0	0.0	0.0	0.0	1.0	0.0	0.0
SYT16	83851	symbol	H. sapiens	83851	H. sapiens	SYT16	synaptotagmin 16	GO:0006887 exocytosis;GO:0032940 secretion by cell;GO:0140352 export from cell		Predicted intracellular proteins	Cytosol (Approved)				0.0	0.0	0.0	0.0	0.0	0.0	0.0	0.0	0.0	0.0	0.0	0.0	0.0	0.0	0.0	0.0	0.0	0.0	0.0	0.0
RPS5	6193	symbol	H. sapiens	6193	H. sapiens	RPS5	ribosomal protein S5	GO:0000028 ribosomal small subunit assembly;GO:0006450 regulation of translational fidelity;GO:0042255 ribosome assembly		Ribosomal proteins; Predicted intracellular proteins	Cytosol;Endoplasmic reticulum (Supported)	Artenimol		(M5926)HALLMARK MYC TARGETS V1	1.0	0.0	0.0	0.0	0.0	0.0	0.0	1.0	0.0	0.0	0.0	0.0	0.0	0.0	0.0	0.0	0.0	0.0	0.0	0.0
ZSWIM4	65249	symbol	H. sapiens	65249	H. sapiens	ZSWIM4	zinc finger SWIM-type containing 4			Predicted intracellular proteins					0.0	0.0	0.0	0.0	0.0	0.0	0.0	0.0	0.0	0.0	0.0	0.0	0.0	0.0	0.0	0.0	0.0	0.0	0.0	0.0
SNORA49	677829	symbol	H. sapiens	677829	H. sapiens	SNORA49	small nucleolar RNA, H/ACA box 49	GO:0006396 RNA processing;GO:0016070 RNA metabolic process;GO:0010467 gene expression							0.0	0.0	0.0	0.0	0.0	0.0	0.0	0.0	0.0	0.0	0.0	0.0	0.0	0.0	0.0	0.0	0.0	0.0	0.0	0.0
AMPD2	271	symbol	H. sapiens	271	H. sapiens	AMPD2	adenosine monophosphate deaminase 2	GO:0032264 IMP salvage;GO:0106380 purine ribonucleotide salvage;GO:0032261 purine nucleotide salvage		Human disease related genes:Congenital malformations:Congenital malformations of the nervous system; Human disease related genes:Nervous system diseases:Other nervous and sensory system diseases; ENZYME proteins:Hydrolases; Disease related genes; Potential drug targets; Enzymes; Predicted intracellular proteins	Cytosol (Enhanced)				1.0	0.0	0.0	0.0	0.0	0.0	0.0	0.0	0.0	0.0	0.0	0.0	0.0	0.0	0.0	0.0	0.0	0.0	0.0	0.0
GALNT2	2590	symbol	H. sapiens	2590	H. sapiens	GALNT2	polypeptide N-acetylgalactosaminyltransferase 2	GO:0018243 protein O-linked glycosylation via threonine;GO:0018242 protein O-linked glycosylation via serine;GO:0016266 O-glycan processing		ENZYME proteins:Transferases; Disease related genes; Potential drug targets; Enzymes; Predicted intracellular proteins; Human disease related genes:Congenital disorders of metabolism:Congenital disorders of glycan/glycoprotein metabolism	Golgi apparatus (Supported)				0.0	0.0	0.0	0.0	0.0	0.0	0.0	0.0	0.0	0.0	0.0	0.0	0.0	0.0	0.0	0.0	0.0	0.0	0.0	0.0
GK	2710	symbol	H. sapiens	2710	H. sapiens	GK	glycerol kinase	GO:0046167 glycerol-3-phosphate biosynthetic process;GO:0019563 glycerol catabolic process;GO:0019405 alditol catabolic process		Human disease related genes:Congenital disorders of metabolism:Congenital disorders of lipid/glycolipid metabolism; Disease related genes; Potential drug targets; Enzymes; Predicted intracellular proteins; ENZYME proteins:Transferases					0.0	0.0	0.0	0.0	0.0	0.0	0.0	0.0	0.0	0.0	0.0	0.0	0.0	0.0	0.0	0.0	0.0	0.0	0.0	0.0
EPPK1	83481	symbol	H. sapiens	83481	H. sapiens	EPPK1	epiplakin 1	GO:0051548 negative regulation of keratinocyte migration;GO:1905041 regulation of epithelium regeneration;GO:0045110 intermediate filament bundle assembly		Predicted intracellular proteins	Intermediate filaments (Enhanced)				0.0	0.0	0.0	0.0	0.0	0.0	0.0	0.0	0.0	0.0	0.0	0.0	0.0	1.0	0.0	0.0	0.0	0.0	0.0	1.0
LRRC56	115399	symbol	H. sapiens	115399	H. sapiens	LRRC56	leucine rich repeat containing 56	GO:0030030 cell projection organization;GO:0016043 cellular component organization;GO:0071840 cellular component organization or biogenesis		Predicted intracellular proteins; Human disease related genes:Respiratory diseases:Tracheobronchial diseases; Disease related genes					0.0	0.0	0.0	0.0	0.0	0.0	0.0	0.0	0.0	0.0	0.0	0.0	0.0	0.0	0.0	0.0	0.0	0.0	0.0	0.0
SNORA14B	677802	symbol	H. sapiens	677802	H. sapiens	SNORA14B	small nucleolar RNA, H/ACA box 14B	GO:0006396 RNA processing;GO:0016070 RNA metabolic process;GO:0010467 gene expression							0.0	0.0	0.0	0.0	0.0	0.0	0.0	0.0	0.0	0.0	0.0	0.0	0.0	0.0	0.0	0.0	0.0	0.0	0.0	0.0
CDK6	1021	symbol	H. sapiens	1021	H. sapiens	CDK6	cyclin dependent kinase 6	GO:0043696 dedifferentiation;GO:0043697 cell dedifferentiation;GO:0045656 negative regulation of monocyte differentiation	CMGC Ser/Thr protein kinase family	FDA approved drug targets:Small molecule drugs; Human disease related genes:Congenital malformations:Congenital malformations of the nervous system; Cancer-related genes:Candidate cancer biomarkers; Kinases:CMGC Ser/Thr protein kinases; Disease related genes; Enzymes; Predicted intracellular proteins; ENZYME proteins:Transferases	Nucleoplasm (Supported); Additional: Cytosol	Alvocidib; (2S)-2-({6-[(3-Amino-5-chlorophenyl)amino]-9-isopropyl-9H-purin-2-yl}amino)-3-methyl-1-butanol; Fisetin; Palbociclib; Ribociclib; Abemaciclib	(M234)PID IL2 STAT5 PATHWAY; (M58)PID AR PATHWAY; (M279)PID RB 1PATHWAY	(M5919)HALLMARK HEDGEHOG SIGNALING; (M5908)HALLMARK ANDROGEN RESPONSE	1.0	0.0	0.0	0.0	0.0	1.0	0.0	0.0	1.0	1.0	0.0	0.0	1.0	0.0	1.0	0.0	1.0	0.0	0.0	0.0
GPRASP2	114928	symbol	H. sapiens	114928	H. sapiens	GPRASP2	G protein-coupled receptor associated sorting protein 2			Predicted intracellular proteins; Disease related genes	Cytosol (Approved); Additional: Nucleoplasm				0.0	0.0	0.0	0.0	0.0	0.0	0.0	0.0	0.0	0.0	0.0	0.0	0.0	0.0	0.0	0.0	0.0	0.0	0.0	0.0
SNORA9	677798	symbol	H. sapiens	677798	H. sapiens	SNORA9	small nucleolar RNA, H/ACA box 9	GO:0006396 RNA processing;GO:0016070 RNA metabolic process;GO:0010467 gene expression							0.0	0.0	0.0	0.0	0.0	0.0	0.0	0.0	0.0	0.0	0.0	0.0	0.0	0.0	0.0	0.0	0.0	0.0	0.0	0.0
FOXD2	2306	symbol	H. sapiens	2306	H. sapiens	FOXD2	forkhead box D2	GO:0045944 positive regulation of transcription by RNA polymerase II;GO:0045893 positive regulation of transcription, DNA-templated;GO:1903508 positive regulation of nucleic acid-templated transcription		Transcription factors:Helix-turn-helix domains; Predicted intracellular proteins					0.0	0.0	0.0	0.0	0.0	0.0	0.0	0.0	0.0	0.0	0.0	0.0	0.0	0.0	0.0	0.0	0.0	0.0	0.0	0.0
ARRDC3-AS1	100129716	symbol	H. sapiens	100129716	H. sapiens	ARRDC3-AS1	ARRDC3 antisense RNA 1								0.0	0.0	0.0	0.0	0.0	0.0	0.0	0.0	0.0	0.0	0.0	0.0	0.0	0.0	0.0	0.0	0.0	0.0	0.0	0.0
NGF	4803	symbol	H. sapiens	4803	H. sapiens	NGF	nerve growth factor	GO:0048672 positive regulation of collateral sprouting;GO:0038180 nerve growth factor signaling pathway;GO:0048670 regulation of collateral sprouting		Candidate cardiovascular disease genes; Human disease related genes:Nervous system diseases:Other nervous and sensory system diseases; Cancer-related genes:Candidate cancer biomarkers; Predicted secreted proteins; Disease related genes; RAS pathway related proteins; Predicted intracellular proteins		Clenbuterol; RI 624; Polaprezinc	(M18895)SA TRKA RECEPTOR; (M271)PID PI3K PLC TRK PATHWAY; (M100)PID SHP2 PATHWAY	(M5923)HALLMARK PI3K AKT MTOR SIGNALING; (M5953)HALLMARK KRAS SIGNALING UP	0.0	0.0	0.0	0.0	0.0	0.0	1.0	0.0	1.0	0.0	0.0	0.0	0.0	1.0	0.0	1.0	0.0	0.0	0.0	1.0
HGH1	51236	symbol	H. sapiens	51236	H. sapiens	HGH1	HGH1 homolog	GO:0008150 biological_process		Predicted intracellular proteins	Cytosol;Nuclear bodies (Supported); Additional: Nucleoplasm				0.0	0.0	0.0	0.0	0.0	0.0	0.0	0.0	0.0	0.0	0.0	0.0	0.0	0.0	0.0	0.0	0.0	0.0	0.0	0.0
LOC283731	283731	Gene_ID	H. sapiens	283731	H. sapiens	LOC283731	uncharacterized LOC283731								0.0	0.0	0.0	0.0	0.0	0.0	0.0	0.0	0.0	0.0	0.0	0.0	0.0	0.0	0.0	0.0	0.0	0.0	0.0	0.0
RCOR3	55758	symbol	H. sapiens	55758	H. sapiens	RCOR3	REST corepressor 3	GO:0016575 histone deacetylation;GO:0006476 protein deacetylation;GO:0035601 protein deacylation		Transcription factors:Helix-turn-helix domains; Predicted intracellular proteins	Nucleoplasm (Enhanced); Additional: Cytosol				0.0	0.0	0.0	0.0	0.0	0.0	0.0	0.0	0.0	0.0	0.0	0.0	0.0	0.0	0.0	0.0	0.0	0.0	0.0	0.0
TPRA1	131601	symbol	H. sapiens	131601	H. sapiens	TPRA1	transmembrane protein adipocyte associated 1	GO:0040016 embryonic cleavage;GO:1901991 negative regulation of mitotic cell cycle phase transition;GO:0045930 negative regulation of mitotic cell cycle		Predicted intracellular proteins	Vesicles (Approved)				0.0	0.0	0.0	0.0	0.0	0.0	0.0	0.0	0.0	0.0	0.0	0.0	0.0	0.0	0.0	0.0	0.0	0.0	0.0	0.0
MDGA1	266727	symbol	H. sapiens	266727	H. sapiens	MDGA1	MAM domain containing glycosylphosphatidylinositol anchor 1	GO:0099179 regulation of synaptic membrane adhesion;GO:0021527 spinal cord association neuron differentiation;GO:0021516 dorsal spinal cord development		Predicted intracellular proteins	Plasma membrane (Supported); Additional: Golgi apparatus			(M5916)HALLMARK APICAL SURFACE	0.0	0.0	0.0	0.0	0.0	0.0	0.0	0.0	0.0	0.0	0.0	0.0	0.0	0.0	0.0	0.0	0.0	0.0	0.0	0.0
IGF2BP1	10642	symbol	H. sapiens	10642	H. sapiens	IGF2BP1	insulin like growth factor 2 mRNA binding protein 1	GO:0022013 pallium cell proliferation in forebrain;GO:0010610 regulation of mRNA stability involved in response to stress;GO:0070934 CRD-mediated mRNA stabilization		Predicted intracellular proteins	Cytosol (Supported)		(M223)PID BETA CATENIN NUC PATHWAY		0.0	0.0	0.0	0.0	0.0	0.0	1.0	1.0	0.0	0.0	1.0	0.0	0.0	0.0	0.0	1.0	0.0	0.0	0.0	0.0
UBB	7314	symbol	H. sapiens	7314	H. sapiens	UBB	ubiquitin B	GO:1902527 positive regulation of protein monoubiquitination;GO:1902525 regulation of protein monoubiquitination;GO:0021886 hypothalamus gonadotrophin-releasing hormone neuron differentiation		Predicted intracellular proteins		(4s)-5-Fluoro-L-Leucine			1.0	1.0	1.0	1.0	1.0	0.0	1.0	1.0	1.0	0.0	1.0	0.0	0.0	0.0	0.0	1.0	0.0	0.0	0.0	0.0
AMOTL2	51421	symbol	H. sapiens	51421	H. sapiens	AMOTL2	angiomotin like 2	GO:0003365 establishment of cell polarity involved in ameboidal cell migration;GO:0035329 hippo signaling;GO:0030010 establishment of cell polarity		Predicted intracellular proteins	Cell Junctions (Approved)				0.0	0.0	0.0	0.0	0.0	0.0	0.0	0.0	0.0	1.0	0.0	0.0	0.0	0.0	0.0	0.0	0.0	1.0	0.0	0.0
XKR5	389610	symbol	H. sapiens	389610	H. sapiens	XKR5	XK related 5	GO:0070782 phosphatidylserine exposure on apoptotic cell surface;GO:0043652 engulfment of apoptotic cell;GO:0017121 plasma membrane phospholipid scrambling		Transporters:Electrochemical Potential-driven transporters					0.0	0.0	0.0	0.0	0.0	0.0	0.0	0.0	0.0	0.0	0.0	0.0	0.0	0.0	0.0	0.0	0.0	0.0	0.0	0.0
SREBF1	6720	symbol	H. sapiens	6720	H. sapiens	SREBF1	sterol regulatory element binding transcription factor 1	GO:0003062 regulation of heart rate by chemical signal;GO:0032933 SREBP signaling pathway;GO:0045542 positive regulation of cholesterol biosynthetic process		Human disease related genes:Congenital malformations:Congenital malformations of skin; Transcription factors:Basic domains; Predicted intracellular proteins	Cytosol;Golgi apparatus;Nucleoplasm (Supported)	Doconexent; Omega-3-acid ethyl esters; Omega-3 fatty acids; Fish oil	(M7997)SA CASPASE CASCADE; (M162)PID RXR VDR PATHWAY; (M220)PID CASPASE PATHWAY		1.0	0.0	1.0	0.0	0.0	0.0	0.0	0.0	1.0	0.0	0.0	0.0	0.0	0.0	0.0	0.0	0.0	0.0	0.0	0.0
BCAS4	55653	symbol	H. sapiens	55653	H. sapiens	BCAS4	breast carcinoma amplified sequence 4			Predicted intracellular proteins; Disease related genes	Cytosol;Intermediate filaments (Approved)				0.0	0.0	0.0	0.0	0.0	0.0	0.0	0.0	0.0	0.0	0.0	0.0	0.0	0.0	0.0	0.0	0.0	0.0	0.0	0.0
ZNF808	388558	symbol	H. sapiens	388558	H. sapiens	ZNF808	zinc finger protein 808	GO:0045944 positive regulation of transcription by RNA polymerase II;GO:0045893 positive regulation of transcription, DNA-templated;GO:1903508 positive regulation of nucleic acid-templated transcription		Predicted intracellular proteins; Transcription factors:Zinc-coordinating DNA-binding domains					0.0	0.0	0.0	0.0	0.0	0.0	0.0	0.0	0.0	0.0	0.0	0.0	0.0	0.0	0.0	0.0	0.0	0.0	0.0	0.0
SNORA34	677815	gene_synonym	H. sapiens	677815	H. sapiens	SNORA2C	small nucleolar RNA, H/ACA box 2C	GO:0006396 RNA processing;GO:0016070 RNA metabolic process;GO:0010467 gene expression							0.0	0.0	0.0	0.0	0.0	0.0	0.0	0.0	0.0	0.0	0.0	0.0	0.0	0.0	0.0	0.0	0.0	0.0	0.0	0.0
SERINC5	256987	symbol	H. sapiens	256987	H. sapiens	SERINC5	serine incorporator 5	GO:1904217 regulation of CDP-diacylglycerol-serine O-phosphatidyltransferase activity;GO:1904219 positive regulation of CDP-diacylglycerol-serine O-phosphatidyltransferase activity;GO:1904222 positive regulation of serine C-palmitoyltransferase activity		Transporters	Cytosol;Plasma membrane (Supported); Additional: Centrosome;Vesicles				0.0	0.0	0.0	0.0	0.0	0.0	0.0	1.0	0.0	0.0	0.0	0.0	0.0	0.0	0.0	1.0	0.0	0.0	0.0	0.0
MAP2	4133	symbol	H. sapiens	4133	H. sapiens	MAP2	microtubule associated protein 2	GO:1901951 regulation of anterograde dense core granule transport;GO:1901953 positive regulation of anterograde dense core granule transport;GO:1904809 regulation of dense core granule transport		FDA approved drug targets:Small molecule drugs; Predicted intracellular proteins	Cytosol;Plasma membrane (Approved)	Estramustine; Paclitaxel; Docetaxel	(M87)PID LKB1 PATHWAY		1.0	0.0	0.0	0.0	0.0	0.0	1.0	0.0	0.0	0.0	0.0	0.0	0.0	0.0	0.0	0.0	0.0	0.0	0.0	1.0
RGS2	5997	symbol	H. sapiens	5997	H. sapiens	RGS2	regulator of G protein signaling 2	GO:0140194 negative regulation of adenylate cyclase-inhibiting adrenergic receptor signaling pathway involved in heart process;GO:0140193 regulation of adenylate cyclase-inhibiting adrenergic receptor signaling pathway involved in heart process;GO:1900923 regulation of glycine import across plasma membrane		Predicted intracellular proteins	Cytosol (Supported)				1.0	0.0	0.0	0.0	0.0	0.0	0.0	0.0	0.0	0.0	0.0	0.0	0.0	0.0	0.0	1.0	0.0	0.0	1.0	1.0
SMOX	54498	symbol	H. sapiens	54498	H. sapiens	SMOX	spermine oxidase	GO:0046208 spermine catabolic process;GO:0006598 polyamine catabolic process;GO:0008215 spermine metabolic process		Enzymes; Predicted intracellular proteins; ENZYME proteins:Oxidoreductases	Nucleoplasm (Supported); Additional: Cytosol;Nuclear membrane;Vesicles	Spermine; MDL72527		(M5934)HALLMARK XENOBIOTIC METABOLISM; (M5945)HALLMARK HEME METABOLISM	0.0	0.0	0.0	0.0	0.0	0.0	0.0	1.0	0.0	0.0	0.0	0.0	0.0	0.0	0.0	0.0	0.0	0.0	0.0	0.0
ZNF71	58491	symbol	H. sapiens	58491	H. sapiens	ZNF71	zinc finger protein 71	GO:0045944 positive regulation of transcription by RNA polymerase II;GO:0045893 positive regulation of transcription, DNA-templated;GO:1903508 positive regulation of nucleic acid-templated transcription		Predicted intracellular proteins; Transcription factors:Zinc-coordinating DNA-binding domains	Nucleoli (Approved); Additional: Nucleoplasm				0.0	0.0	0.0	0.0	0.0	0.0	0.0	0.0	0.0	0.0	0.0	0.0	0.0	0.0	0.0	0.0	0.0	0.0	0.0	0.0
AGO1	26523	symbol	H. sapiens	26523	H. sapiens	AGO1	argonaute RISC component 1	GO:0035280 miRNA loading onto RISC involved in gene silencing by miRNA;GO:0010501 RNA secondary structure unwinding;GO:0070922 small RNA loading onto RISC		Predicted intracellular proteins	Cytoplasmic bodies (Supported); Additional: Cytosol				1.0	0.0	0.0	0.0	0.0	0.0	0.0	0.0	0.0	0.0	1.0	0.0	0.0	0.0	0.0	1.0	0.0	0.0	0.0	0.0
DAGLA	747	symbol	H. sapiens	747	H. sapiens	DAGLA	diacylglycerol lipase alpha	GO:0071926 endocannabinoid signaling pathway;GO:0098920 retrograde trans-synaptic signaling by lipid;GO:0098921 retrograde trans-synaptic signaling by endocannabinoid		Disease related genes			(M266)PID NCADHERIN PATHWAY		0.0	0.0	1.0	0.0	0.0	0.0	0.0	0.0	0.0	0.0	0.0	0.0	0.0	0.0	0.0	0.0	0.0	0.0	0.0	0.0
PSMD8	5714	symbol	H. sapiens	5714	H. sapiens	PSMD8	proteasome 26S subunit, non-ATPase 8	GO:0043161 proteasome-mediated ubiquitin-dependent protein catabolic process;GO:0010498 proteasomal protein catabolic process;GO:0006511 ubiquitin-dependent protein catabolic process		Predicted intracellular proteins	Cytosol (Approved); Additional: Nuclear speckles			(M5926)HALLMARK MYC TARGETS V1	1.0	1.0	1.0	0.0	1.0	0.0	0.0	1.0	0.0	0.0	1.0	0.0	0.0	0.0	0.0	1.0	0.0	0.0	0.0	0.0
COL7A1	1294	symbol	H. sapiens	1294	H. sapiens	COL7A1	collagen type VII alpha 1 chain	GO:0035987 endodermal cell differentiation;GO:0001706 endoderm formation;GO:0007492 endoderm development		Predicted secreted proteins; Human disease related genes:Skin diseases:Skin and soft tissue diseases; Human disease related genes:Congenital malformations:Congenital malformations of skin; Disease related genes; Predicted intracellular proteins	Endoplasmic reticulum (Approved); Additional: Vesicles		(M3005)NABA COLLAGENS; (M198)PID SYNDECAN 1 PATHWAY; (M18)PID INTEGRIN1 PATHWAY	(M5930)HALLMARK EPITHELIAL MESENCHYMAL TRANSITION	0.0	0.0	0.0	0.0	0.0	0.0	0.0	0.0	0.0	0.0	0.0	0.0	1.0	0.0	0.0	0.0	0.0	0.0	0.0	0.0
H3F3B	3021	gene_synonym	H. sapiens	3021	H. sapiens	H3-3B	H3.3 histone B	GO:0031508 pericentric heterochromatin assembly;GO:0140462 pericentric heterochromatin organization;GO:1902340 negative regulation of chromosome condensation		Predicted intracellular proteins; Cancer-related genes; Disease related genes	Nucleoplasm (Enhanced)				1.0	0.0	1.0	0.0	0.0	0.0	0.0	0.0	0.0	0.0	0.0	1.0	0.0	0.0	0.0	0.0	0.0	0.0	0.0	1.0
ZNF579	163033	symbol	H. sapiens	163033	H. sapiens	ZNF579	zinc finger protein 579	GO:0006357 regulation of transcription by RNA polymerase II;GO:0006355 regulation of transcription, DNA-templated;GO:1903506 regulation of nucleic acid-templated transcription		Predicted intracellular proteins; Transcription factors:Zinc-coordinating DNA-binding domains	Nucleoplasm (Approved)				0.0	0.0	0.0	0.0	0.0	0.0	0.0	0.0	0.0	0.0	0.0	0.0	0.0	0.0	0.0	0.0	0.0	0.0	0.0	0.0
TMSB15A	11013	symbol	H. sapiens	11013	H. sapiens	TMSB15A	thymosin beta 15A	GO:0042989 sequestering of actin monomers;GO:0030837 negative regulation of actin filament polymerization;GO:0032507 maintenance of protein location in cell		Predicted intracellular proteins					0.0	0.0	0.0	0.0	0.0	0.0	0.0	0.0	0.0	0.0	0.0	0.0	0.0	0.0	0.0	0.0	0.0	0.0	0.0	1.0
CHSY3	337876	symbol	H. sapiens	337876	H. sapiens	CHSY3	chondroitin sulfate synthase 3	GO:0030206 chondroitin sulfate biosynthetic process;GO:0050650 chondroitin sulfate proteoglycan biosynthetic process;GO:0030204 chondroitin sulfate metabolic process		Enzymes; Predicted intracellular proteins; ENZYME proteins:Transferases					0.0	0.0	0.0	0.0	0.0	0.0	0.0	0.0	0.0	0.0	0.0	0.0	0.0	0.0	0.0	0.0	0.0	0.0	0.0	0.0
RNF216P1	441191	symbol	H. sapiens	441191	H. sapiens	RNF216P1	ring finger protein 216 pseudogene 1								0.0	0.0	0.0	0.0	0.0	0.0	0.0	0.0	0.0	0.0	0.0	0.0	0.0	0.0	0.0	0.0	0.0	0.0	0.0	0.0
RPLP0	6175	symbol	H. sapiens	6175	H. sapiens	RPLP0	ribosomal protein lateral stalk subunit P0	GO:0000027 ribosomal large subunit assembly;GO:0042255 ribosome assembly;GO:0042273 ribosomal large subunit biogenesis		Ribosomal proteins; Predicted intracellular proteins	Cytosol;Endoplasmic reticulum (Supported)			(M5926)HALLMARK MYC TARGETS V1	1.0	0.0	1.0	0.0	0.0	0.0	0.0	1.0	0.0	0.0	0.0	0.0	0.0	0.0	0.0	0.0	0.0	0.0	0.0	0.0
LOC100288162	100288162	Gene_ID	H. sapiens	100288162	H. sapiens	LOC100288162	uncharacterized LOC100288162								0.0	0.0	0.0	0.0	0.0	0.0	0.0	0.0	0.0	0.0	0.0	0.0	0.0	0.0	0.0	0.0	0.0	0.0	0.0	0.0
ZNRF3	84133	symbol	H. sapiens	84133	H. sapiens	ZNRF3	zinc and ring finger 3	GO:0038018 Wnt receptor catabolic process;GO:2000051 negative regulation of non-canonical Wnt signaling pathway;GO:2000095 regulation of Wnt signaling pathway, planar cell polarity pathway		Enzymes; ENZYME proteins:Transferases	Golgi apparatus (Uncertain)				1.0	0.0	0.0	0.0	0.0	0.0	0.0	0.0	0.0	1.0	0.0	0.0	0.0	0.0	0.0	0.0	0.0	0.0	0.0	0.0
C8orf82	414919	symbol	H. sapiens	414919	H. sapiens	C8orf82	chromosome 8 open reading frame 82			Predicted intracellular proteins	Nucleoplasm (Approved)				0.0	0.0	0.0	0.0	0.0	0.0	0.0	0.0	0.0	0.0	0.0	0.0	0.0	0.0	0.0	0.0	0.0	0.0	0.0	0.0
PTCH2	8643	symbol	H. sapiens	8643	H. sapiens	PTCH2	patched 2	GO:0009957 epidermal cell fate specification;GO:0045606 positive regulation of epidermal cell differentiation;GO:0045684 positive regulation of epidermis development		Cancer-related genes:Candidate cancer biomarkers; Human disease related genes:Skin diseases:Skin and soft tissue diseases; Disease related genes; Potential drug targets; Transporters:Electrochemical Potential-driven transporters; Predicted intracellular proteins	Plasma membrane (Supported); Additional: Nucleoli		(M211)PID HEDGEHOG 2PATHWAY		0.0	0.0	0.0	0.0	0.0	1.0	0.0	0.0	0.0	0.0	0.0	0.0	0.0	0.0	0.0	0.0	0.0	0.0	0.0	1.0
ZSCAN25	221785	symbol	H. sapiens	221785	H. sapiens	ZSCAN25	zinc finger and SCAN domain containing 25	GO:0006357 regulation of transcription by RNA polymerase II;GO:0006355 regulation of transcription, DNA-templated;GO:1903506 regulation of nucleic acid-templated transcription		Predicted intracellular proteins; Transcription factors:Zinc-coordinating DNA-binding domains	Nucleoli fibrillar center (Approved); Additional: Nucleoplasm				0.0	0.0	0.0	0.0	0.0	0.0	0.0	0.0	0.0	0.0	0.0	0.0	0.0	0.0	0.0	0.0	0.0	0.0	0.0	0.0
ARHGAP4	393	symbol	H. sapiens	393	H. sapiens	ARHGAP4	Rho GTPase activating protein 4	GO:0010764 negative regulation of fibroblast migration;GO:0010762 regulation of fibroblast migration;GO:0030517 negative regulation of axon extension		Predicted intracellular proteins	Cytosol (Supported)		(M5193)SIG CHEMOTAXIS; (M68)PID RHOA REG PATHWAY	(M5893)HALLMARK MITOTIC SPINDLE	1.0	0.0	0.0	0.0	0.0	0.0	1.0	0.0	0.0	0.0	0.0	0.0	0.0	1.0	0.0	0.0	0.0	0.0	0.0	1.0
RPP25L	138716	symbol	H. sapiens	138716	H. sapiens	RPP25L	ribonuclease P/MRP subunit p25 like	GO:0001682 tRNA 5'-leader removal;GO:0099116 tRNA 5'-end processing;GO:0034471 ncRNA 5'-end processing		Predicted intracellular proteins	Nucleoplasm (Supported)				0.0	0.0	0.0	0.0	0.0	0.0	0.0	0.0	0.0	0.0	0.0	0.0	0.0	0.0	0.0	0.0	0.0	0.0	0.0	0.0
LINC00597	81698	symbol	H. sapiens	81698	H. sapiens	LINC00597	long intergenic non-protein coding RNA 597								0.0	0.0	0.0	0.0	0.0	0.0	0.0	0.0	0.0	0.0	0.0	0.0	0.0	0.0	0.0	0.0	0.0	0.0	0.0	0.0
C1QBP	708	symbol	H. sapiens	708	H. sapiens	C1QBP	complement C1q binding protein	GO:0039534 negative regulation of MDA-5 signaling pathway;GO:0042256 mature ribosome assembly;GO:1901165 positive regulation of trophoblast cell migration		Transporters; Cancer-related genes:Candidate cancer biomarkers; Predicted secreted proteins; Disease related genes; Potential drug targets; Predicted intracellular proteins; Human disease related genes:Congenital disorders of metabolism:Mitochondrial diseases	Plasma membrane (Approved); Additional: Mitochondria	Hyaluronic acid; Copper		(M5926)HALLMARK MYC TARGETS V1	1.0	0.0	1.0	0.0	1.0	0.0	0.0	0.0	0.0	0.0	0.0	0.0	0.0	0.0	0.0	0.0	0.0	0.0	0.0	0.0
LINC01465	283416	symbol	H. sapiens	283416	H. sapiens	LINC01465	long intergenic non-protein coding RNA 1465								0.0	0.0	0.0	0.0	0.0	0.0	0.0	0.0	0.0	0.0	0.0	0.0	0.0	0.0	0.0	0.0	0.0	0.0	0.0	0.0
POLR3E	55718	symbol	H. sapiens	55718	H. sapiens	POLR3E	RNA polymerase III subunit E	GO:0051607 defense response to virus;GO:0140546 defense response to symbiont;GO:0009615 response to virus		Predicted intracellular proteins; RNA polymerase related proteins	Nucleoplasm (Enhanced)				1.0	0.0	0.0	0.0	0.0	0.0	0.0	0.0	0.0	0.0	0.0	0.0	0.0	0.0	0.0	0.0	0.0	0.0	0.0	0.0
SCAP	22937	symbol	H. sapiens	22937	H. sapiens	SCAP	SREBF chaperone	GO:0045541 negative regulation of cholesterol biosynthetic process;GO:0090206 negative regulation of cholesterol metabolic process;GO:0106119 negative regulation of sterol biosynthetic process					(M7997)SA CASPASE CASCADE		0.0	0.0	0.0	0.0	0.0	0.0	0.0	0.0	0.0	0.0	0.0	0.0	0.0	0.0	0.0	0.0	0.0	0.0	0.0	0.0
SH3TC1	54436	symbol	H. sapiens	54436	H. sapiens	SH3TC1	SH3 domain and tetratricopeptide repeats 1	GO:0008150 biological_process		Predicted intracellular proteins	Nucleoli;Nucleoli rim (Approved); Additional: Cytosol;Nucleoplasm				0.0	0.0	0.0	0.0	0.0	0.0	0.0	0.0	0.0	0.0	0.0	0.0	0.0	0.0	0.0	0.0	0.0	0.0	0.0	0.0
EIF3F	8665	symbol	H. sapiens	8665	H. sapiens	EIF3F	eukaryotic translation initiation factor 3 subunit F	GO:0075522 IRES-dependent viral translational initiation;GO:0019081 viral translation;GO:0019080 viral gene expression		Human disease related genes:Other diseases:Mental and behavioural disorders; ENZYME proteins:Hydrolases; Disease related genes; Potential drug targets; Enzymes; Predicted intracellular proteins		Quercetin			0.0	0.0	0.0	0.0	0.0	0.0	0.0	1.0	0.0	0.0	0.0	0.0	0.0	0.0	0.0	0.0	0.0	0.0	0.0	0.0
C9orf131	138724	symbol	H. sapiens	138724	H. sapiens	C9orf131	chromosome 9 open reading frame 131			Predicted intracellular proteins	Mitochondria (Approved)				0.0	0.0	0.0	0.0	0.0	0.0	0.0	0.0	0.0	0.0	0.0	0.0	0.0	0.0	0.0	0.0	0.0	0.0	0.0	0.0
MGAT3	4248	symbol	H. sapiens	4248	H. sapiens	MGAT3	beta-1,4-mannosyl-glycoprotein 4-beta-N-acetylglucosaminyltransferase	GO:1904351 negative regulation of protein catabolic process in the vacuole;GO:1905166 negative regulation of lysosomal protein catabolic process;GO:1902965 regulation of protein localization to early endosome		Enzymes; Predicted intracellular proteins; ENZYME proteins:Transferases			(M232)PID ECADHERIN STABILIZATION PATHWAY		0.0	0.0	0.0	0.0	0.0	0.0	0.0	1.0	0.0	0.0	0.0	0.0	0.0	0.0	0.0	0.0	0.0	0.0	0.0	0.0
MRPS18C	51023	symbol	H. sapiens	51023	H. sapiens	MRPS18C	mitochondrial ribosomal protein S18C	GO:0006412 translation;GO:0043043 peptide biosynthetic process;GO:0043604 amide biosynthetic process		Ribosomal proteins; Predicted intracellular proteins					0.0	0.0	0.0	0.0	0.0	0.0	0.0	1.0	0.0	0.0	0.0	0.0	0.0	0.0	0.0	0.0	0.0	0.0	0.0	0.0
CTGLF12P	414224	gene_synonym	H. sapiens	414224	H. sapiens	AGAP12P	ArfGAP with GTPase domain, ankyrin repeat and PH domain 12, pseudogene								0.0	0.0	0.0	0.0	0.0	0.0	0.0	0.0	0.0	0.0	0.0	0.0	0.0	0.0	0.0	0.0	0.0	0.0	0.0	0.0
FGF5	2250	symbol	H. sapiens	2250	H. sapiens	FGF5	fibroblast growth factor 5	GO:0023019 signal transduction involved in regulation of gene expression;GO:0008543 fibroblast growth factor receptor signaling pathway;GO:0044344 cellular response to fibroblast growth factor stimulus		RAS pathway related proteins; Human disease related genes:Skin diseases:Skin and soft tissue diseases; Predicted secreted proteins; Disease related genes	Nucleoli fibrillar center (Supported); Additional: Cytosol;Nucleoplasm		(M5883)NABA SECRETED FACTORS; (M5885)NABA MATRISOME ASSOCIATED; (M5889)NABA MATRISOME		0.0	0.0	0.0	0.0	0.0	1.0	0.0	0.0	1.0	0.0	1.0	0.0	0.0	0.0	0.0	1.0	0.0	0.0	0.0	0.0
SEMA4C	54910	symbol	H. sapiens	54910	H. sapiens	SEMA4C	semaphorin 4C	GO:0021535 cell migration in hindbrain;GO:0048843 negative regulation of axon extension involved in axon guidance;GO:0048841 regulation of axon extension involved in axon guidance		Predicted intracellular proteins			(M5880)NABA ECM AFFILIATED; (M5885)NABA MATRISOME ASSOCIATED; (M5889)NABA MATRISOME		1.0	0.0	0.0	0.0	0.0	0.0	1.0	0.0	0.0	0.0	0.0	0.0	0.0	0.0	0.0	0.0	0.0	1.0	0.0	1.0
ZBED9	114821	symbol	H. sapiens	114821	H. sapiens	ZBED9	zinc finger BED-type containing 9	GO:0015074 DNA integration;GO:0050679 positive regulation of epithelial cell proliferation;GO:0045787 positive regulation of cell cycle		Predicted intracellular proteins	Nucleoli (Approved); Additional: Golgi apparatus;Nucleoplasm				0.0	0.0	0.0	0.0	0.0	0.0	0.0	0.0	0.0	0.0	0.0	0.0	0.0	0.0	0.0	0.0	0.0	0.0	0.0	0.0
PTGER4	5734	symbol	H. sapiens	5734	H. sapiens	PTGER4	prostaglandin E receptor 4	GO:2000419 regulation of eosinophil extravasation;GO:2000420 negative regulation of eosinophil extravasation;GO:2000417 negative regulation of eosinophil migration		G-protein coupled receptors:GPCRs excl olfactory receptors; FDA approved drug targets:Small molecule drugs		Dinoprostone; Misoprostol; Limaprost; Castor oil; Grapiprant		(M5890)HALLMARK TNFA SIGNALING VIA NFKB; (M5932)HALLMARK INFLAMMATORY RESPONSE	0.0	0.0	0.0	1.0	0.0	1.0	0.0	0.0	0.0	0.0	0.0	0.0	0.0	0.0	1.0	0.0	0.0	0.0	0.0	0.0
TRAF4	9618	symbol	H. sapiens	9618	H. sapiens	TRAF4	TNF receptor associated factor 4	GO:0007250 activation of NF-kappaB-inducing kinase activity;GO:0038061 NIK/NF-kappaB signaling;GO:0007585 respiratory gaseous exchange by respiratory system		Predicted intracellular proteins; Cancer-related genes:Candidate cancer biomarkers	Nucleoli fibrillar center (Supported); Additional: Cytosol;Nucleoplasm		(M256)PID TAP63 PATHWAY	(M5939)HALLMARK P53 PATHWAY	0.0	0.0	0.0	0.0	0.0	1.0	0.0	0.0	0.0	0.0	0.0	0.0	1.0	0.0	0.0	1.0	0.0	0.0	0.0	0.0
KCNJ13	3769	symbol	H. sapiens	3769	H. sapiens	KCNJ13	potassium inwardly rectifying channel subfamily J member 13	GO:1990573 potassium ion import across plasma membrane;GO:0098659 inorganic cation import across plasma membrane;GO:0099587 inorganic ion import across plasma membrane		Voltage-gated ion channels:Inwardly Rectifying Potassium Channels; Human disease related genes:Nervous system diseases:Eye disease; Disease related genes; Potential drug targets; Transporters:Transporter channels and pores	Nuclear membrane (Approved)				0.0	0.0	0.0	0.0	0.0	0.0	0.0	0.0	0.0	0.0	0.0	0.0	1.0	0.0	0.0	0.0	0.0	0.0	1.0	0.0
KLHL26	55295	symbol	H. sapiens	55295	H. sapiens	KLHL26	kelch like family member 26			Predicted intracellular proteins					0.0	0.0	0.0	0.0	0.0	0.0	0.0	0.0	0.0	0.0	0.0	0.0	0.0	0.0	0.0	0.0	0.0	0.0	0.0	0.0
CPA4	51200	symbol	H. sapiens	51200	H. sapiens	CPA4	carboxypeptidase A4	GO:0016573 histone acetylation;GO:0018393 internal peptidyl-lysine acetylation;GO:0006475 internal protein amino acid acetylation		Enzymes; Predicted secreted proteins; Predicted intracellular proteins; Peptidases:Metallopeptidases	Nucleoplasm (Approved); Additional: Centrosome;Cytosol				0.0	0.0	0.0	0.0	0.0	0.0	0.0	0.0	0.0	0.0	0.0	0.0	0.0	0.0	0.0	0.0	0.0	0.0	0.0	0.0
C1orf53	388722	symbol	H. sapiens	388722	H. sapiens	C1orf53	chromosome 1 open reading frame 53			Predicted intracellular proteins	Vesicles (Approved); Additional: Aggresome				0.0	0.0	0.0	0.0	0.0	0.0	0.0	0.0	0.0	0.0	0.0	0.0	0.0	0.0	0.0	0.0	0.0	0.0	0.0	0.0
RPP21	79897	symbol	H. sapiens	79897	H. sapiens	RPP21	ribonuclease P/MRP subunit p21	GO:0001682 tRNA 5'-leader removal;GO:0099116 tRNA 5'-end processing;GO:0034471 ncRNA 5'-end processing		Enzymes; ENZYME proteins:Hydrolases; Predicted intracellular proteins					0.0	0.0	0.0	0.0	0.0	0.0	0.0	1.0	0.0	0.0	0.0	0.0	0.0	0.0	0.0	0.0	0.0	0.0	0.0	0.0
IRF2BPL	64207	symbol	H. sapiens	64207	H. sapiens	IRF2BPL	interferon regulatory factor 2 binding protein like	GO:0046543 development of secondary female sexual characteristics;GO:0045136 development of secondary sexual characteristics;GO:0016567 protein ubiquitination		Human disease related genes:Other diseases:Mental and behavioural disorders; Disease related genes; Potential drug targets; Enzymes; Predicted intracellular proteins; ENZYME proteins:Transferases	Nucleoplasm (Enhanced)				0.0	0.0	0.0	0.0	0.0	0.0	0.0	0.0	0.0	0.0	0.0	0.0	0.0	0.0	0.0	0.0	0.0	0.0	0.0	0.0
IGFBP7-AS1	255130	symbol	H. sapiens	255130	H. sapiens	IGFBP7-AS1	IGFBP7 antisense RNA 1								0.0	0.0	0.0	0.0	0.0	0.0	0.0	0.0	0.0	0.0	0.0	0.0	0.0	0.0	0.0	0.0	0.0	0.0	0.0	0.0
KCNG1	3755	symbol	H. sapiens	3755	H. sapiens	KCNG1	potassium voltage-gated channel modifier subfamily G member 1	GO:1902259 regulation of delayed rectifier potassium channel activity;GO:1901016 regulation of potassium ion transmembrane transporter activity;GO:1901379 regulation of potassium ion transmembrane transport		Predicted intracellular proteins; Transporters:Transporter channels and pores; Voltage-gated ion channels:Voltage-Gated Potassium Channels	Vesicles (Approved)				0.0	0.0	0.0	0.0	0.0	0.0	0.0	0.0	0.0	0.0	0.0	0.0	0.0	0.0	0.0	0.0	0.0	0.0	1.0	0.0
KDM5C	8242	symbol	H. sapiens	8242	H. sapiens	KDM5C	lysine demethylase 5C	GO:0034721 histone H3-K4 demethylation, trimethyl-H3-K4-specific;GO:0034720 histone H3-K4 demethylation;GO:0070076 histone lysine demethylation		Transcription factors:Helix-turn-helix domains; Cancer-related genes:Mutated cancer genes; Human disease related genes:Other diseases:Mental and behavioural disorders; ENZYME proteins:Oxidoreductases; Cancer-related genes:Mutational cancer driver genes; Disease related genes; Potential drug targets; Enzymes; Predicted intracellular proteins	Nucleoplasm (Enhanced); Additional: Cytosol				1.0	0.0	0.0	0.0	0.0	0.0	0.0	0.0	0.0	0.0	0.0	0.0	0.0	0.0	0.0	0.0	0.0	0.0	0.0	0.0
CCDC106	29903	symbol	H. sapiens	29903	H. sapiens	CCDC106	coiled-coil domain containing 106			Predicted intracellular proteins	Nucleoplasm (Supported); Additional: Cytosol			(M5956)HALLMARK KRAS SIGNALING DN	0.0	0.0	0.0	0.0	0.0	0.0	0.0	0.0	0.0	0.0	0.0	0.0	0.0	0.0	0.0	0.0	0.0	0.0	0.0	0.0
LINC01521	54944	symbol	H. sapiens	54944	H. sapiens	LINC01521	long intergenic non-protein coding RNA 1521								0.0	0.0	0.0	0.0	0.0	0.0	0.0	0.0	0.0	0.0	0.0	0.0	0.0	0.0	0.0	0.0	0.0	0.0	0.0	0.0
NOA1	84273	symbol	H. sapiens	84273	H. sapiens	NOA1	nitric oxide associated 1	GO:0043457 regulation of cellular respiration;GO:0032543 mitochondrial translation;GO:0140053 mitochondrial gene expression		Predicted intracellular proteins	Mitochondria (Supported)				0.0	0.0	0.0	0.0	0.0	0.0	0.0	1.0	0.0	0.0	0.0	0.0	0.0	0.0	0.0	0.0	0.0	0.0	0.0	0.0
CBX6	23466	symbol	H. sapiens	23466	H. sapiens	CBX6	chromobox 6	GO:0006325 chromatin organization;GO:0051276 chromosome organization;GO:0000122 negative regulation of transcription by RNA polymerase II		Predicted intracellular proteins	Mitochondria;Nucleoplasm (Approved)				1.0	0.0	0.0	0.0	0.0	0.0	0.0	0.0	0.0	0.0	1.0	0.0	0.0	0.0	0.0	0.0	0.0	0.0	0.0	0.0
DLG4	1742	symbol	H. sapiens	1742	H. sapiens	DLG4	discs large MAGUK scaffold protein 4	GO:1901628 positive regulation of postsynaptic membrane organization;GO:1904719 positive regulation of AMPA glutamate receptor clustering;GO:1901626 regulation of postsynaptic membrane organization		Transporters:Accessory Factors Involved in Transport; Predicted intracellular proteins; Disease related genes; Potential drug targets		Guanidine; Guanosine-5'-Monophosphate	(M13)PID ERBB4 PATHWAY	(M5949)HALLMARK PEROXISOME; (M5941)HALLMARK UV RESPONSE UP	1.0	0.0	0.0	0.0	0.0	0.0	1.0	1.0	1.0	1.0	0.0	0.0	0.0	0.0	0.0	1.0	0.0	0.0	1.0	0.0
SNRPG	6637	symbol	H. sapiens	6637	H. sapiens	SNRPG	small nuclear ribonucleoprotein polypeptide G	GO:0000387 spliceosomal snRNP assembly;GO:0000245 spliceosomal complex assembly;GO:0022618 ribonucleoprotein complex assembly		Predicted intracellular proteins	Nucleoplasm (Approved)			(M5926)HALLMARK MYC TARGETS V1	0.0	0.0	0.0	0.0	0.0	0.0	0.0	0.0	0.0	0.0	0.0	0.0	0.0	0.0	0.0	0.0	0.0	0.0	0.0	0.0
NUTM2G	441457	symbol	H. sapiens	441457	H. sapiens	NUTM2G	NUT family member 2G			Predicted intracellular proteins	Nuclear bodies (Approved)				0.0	0.0	0.0	0.0	0.0	0.0	0.0	0.0	0.0	0.0	0.0	0.0	0.0	0.0	0.0	0.0	0.0	0.0	0.0	0.0
SIL1	64374	symbol	H. sapiens	64374	H. sapiens	SIL1	SIL1 nucleotide exchange factor	GO:0006613 cotranslational protein targeting to membrane;GO:0006612 protein targeting to membrane;GO:0006457 protein folding		Predicted intracellular proteins; Human disease related genes:Nervous system diseases:Neurodegenerative diseases; Disease related genes					0.0	0.0	0.0	0.0	0.0	0.0	0.0	0.0	0.0	0.0	0.0	0.0	0.0	0.0	0.0	0.0	0.0	0.0	0.0	0.0
KIF26B	55083	symbol	H. sapiens	55083	H. sapiens	KIF26B	kinesin family member 26B	GO:0072092 ureteric bud invasion;GO:0072093 metanephric renal vesicle formation;GO:0072033 renal vesicle formation		Predicted intracellular proteins	Microtubules;Plasma membrane (Approved)				0.0	0.0	1.0	0.0	0.0	0.0	0.0	0.0	0.0	0.0	0.0	1.0	0.0	0.0	0.0	0.0	1.0	1.0	0.0	0.0
MDK	4192	symbol	H. sapiens	4192	H. sapiens	MDK	midkine	GO:0030421 defecation;GO:0106091 glial cell projection elongation;GO:1905555 positive regulation of blood vessel branching		Predicted secreted proteins; Cancer-related genes:Candidate cancer biomarkers	Vesicles (Approved)		(M165)PID SYNDECAN 4 PATHWAY; (M277)PID INTEGRIN A4B1 PATHWAY; (M18)PID INTEGRIN1 PATHWAY	(M5907)HALLMARK ESTROGEN RESPONSE LATE; (M5915)HALLMARK APICAL JUNCTION	1.0	0.0	0.0	0.0	0.0	0.0	1.0	0.0	1.0	1.0	0.0	1.0	1.0	1.0	1.0	0.0	1.0	0.0	0.0	0.0
MIR663A	724033	symbol	H. sapiens	724033	H. sapiens	MIR663A	microRNA 663a	GO:0035195 gene silencing by miRNA;GO:0035194 post-transcriptional gene silencing by RNA;GO:0016441 posttranscriptional gene silencing							0.0	0.0	0.0	0.0	0.0	0.0	0.0	0.0	0.0	0.0	0.0	0.0	0.0	0.0	0.0	0.0	0.0	0.0	0.0	0.0
FAM212B	55924	gene_synonym	H. sapiens	55924	H. sapiens	INKA2	inka box actin regulator 2	GO:0043086 negative regulation of catalytic activity;GO:0044092 negative regulation of molecular function;GO:0050790 regulation of catalytic activity		Predicted intracellular proteins	Nucleoplasm (Supported); Additional: Nucleoli;Vesicles				0.0	0.0	0.0	0.0	0.0	0.0	0.0	0.0	0.0	0.0	0.0	0.0	0.0	0.0	0.0	0.0	0.0	0.0	0.0	0.0
JAK3	3718	symbol	H. sapiens	3718	H. sapiens	JAK3	Janus kinase 3	GO:0045219 regulation of FasL production;GO:0045221 negative regulation of FasL production;GO:0002731 negative regulation of dendritic cell cytokine production	Tyr protein kinase family	Human disease related genes:Immune system diseases:Primary immunodeficiency; FDA approved drug targets:Small molecule drugs; Kinases:Tyr protein kinases; Cancer-related genes; Disease related genes; Enzymes; Predicted intracellular proteins; ENZYME proteins:Transferases	Cytosol;Plasma membrane (Approved)	2-tert-butyl-9-fluoro-1,6-dihydrobenzo[h]imidazo[4,5-f]isoquinolin-7-one; R-348; Tofacitinib; Baricitinib; Fostamatinib; Zanubrutinib	(M1718)SIG IL4RECEPTOR IN B LYPHOCYTES; (M234)PID IL2 STAT5 PATHWAY; (M45)PID CD40 PATHWAY		1.0	1.0	1.0	0.0	0.0	1.0	0.0	0.0	1.0	0.0	0.0	0.0	0.0	0.0	1.0	1.0	0.0	0.0	1.0	0.0
PIK3R3	8503	symbol	H. sapiens	8503	H. sapiens	PIK3R3	phosphoinositide-3-kinase regulatory subunit 3	GO:0002042 cell migration involved in sprouting angiogenesis;GO:0036092 phosphatidylinositol-3-phosphate biosynthetic process;GO:0043534 blood vessel endothelial cell migration		RAS pathway related proteins; Predicted intracellular proteins; Cancer-related genes:Candidate cancer biomarkers	Vesicles (Approved); Additional: Nucleoplasm	Isoprenaline; SF1126	(M79)PID TRAIL PATHWAY; (M193)PID NEPHRIN NEPH1 PATHWAY; (M127)PID ERBB1 RECEPTOR PROXIMAL PATHWAY	(M5923)HALLMARK PI3K AKT MTOR SIGNALING; (M5942)HALLMARK UV RESPONSE DN; (M5915)HALLMARK APICAL JUNCTION	1.0	0.0	1.0	0.0	0.0	1.0	0.0	1.0	1.0	0.0	1.0	0.0	1.0	0.0	0.0	1.0	0.0	1.0	0.0	0.0
SNORA40	677822	symbol	H. sapiens	677822	H. sapiens	SNORA40	small nucleolar RNA, H/ACA box 40	GO:0006396 RNA processing;GO:0016070 RNA metabolic process;GO:0010467 gene expression							0.0	0.0	0.0	0.0	0.0	0.0	0.0	0.0	0.0	0.0	0.0	0.0	0.0	0.0	0.0	0.0	0.0	0.0	0.0	0.0
PSPH	5723	symbol	H. sapiens	5723	H. sapiens	PSPH	phosphoserine phosphatase	GO:0006564 L-serine biosynthetic process;GO:0006563 L-serine metabolic process;GO:0009070 serine family amino acid biosynthetic process		ENZYME proteins:Hydrolases; Human disease related genes:Congenital disorders of metabolism:Congenital disorders of amino acid metabolism; Disease related genes; Potential drug targets; Enzymes; Predicted intracellular proteins	Cytosol (Approved)	Zinc; 3-Phosphono-D-alanine; Zinc acetate; Zinc chloride; Zinc sulfate, unspecified form		(M5924)HALLMARK MTORC1 SIGNALING	0.0	0.0	0.0	0.0	0.0	0.0	0.0	1.0	0.0	0.0	0.0	0.0	0.0	0.0	0.0	0.0	0.0	0.0	0.0	0.0
RAB26	25837	symbol	H. sapiens	25837	H. sapiens	RAB26	RAB26, member RAS oncogene family	GO:0099575 regulation of protein catabolic process at presynapse, modulating synaptic transmission;GO:0099171 presynaptic modulation of chemical synaptic transmission;GO:0043001 Golgi to plasma membrane protein transport		Predicted intracellular proteins	Plasma membrane;Vesicles (Uncertain); Additional: Centrosome				0.0	0.0	0.0	0.0	0.0	0.0	0.0	0.0	0.0	0.0	0.0	0.0	0.0	0.0	0.0	0.0	0.0	0.0	0.0	0.0
SLC26A6	65010	symbol	H. sapiens	65010	H. sapiens	SLC26A6	solute carrier family 26 member 6	GO:0015724 formate transport;GO:0015797 mannitol transport;GO:0046724 oxalic acid secretion		Transporters:Electrochemical Potential-driven transporters					0.0	0.0	0.0	0.0	0.0	0.0	0.0	0.0	0.0	0.0	0.0	0.0	0.0	0.0	0.0	0.0	0.0	0.0	1.0	0.0
NCDN	23154	symbol	H. sapiens	23154	H. sapiens	NCDN	neurochondrin	GO:0045453 bone resorption;GO:0046849 bone remodeling;GO:0048168 regulation of neuronal synaptic plasticity		Predicted intracellular proteins	Cytosol (Supported)				0.0	0.0	0.0	0.0	0.0	0.0	1.0	0.0	0.0	0.0	0.0	0.0	0.0	0.0	0.0	0.0	0.0	0.0	0.0	0.0

## Sheet: Enrichment
GroupID	Category	Term	Description	LogP	Log(q-value)	InTerm_InList	Genes	Symbols
1_Summary	Reactome Gene Sets	R-HSA-3214815	HDACs deacetylate histones	-53.2256	-48.8789	47/94	3012,3013,3017,3018,8294,8329,8330,8331,8332,8334,8335,8336,8338,8340,8341,8342,8345,8348,8349,8350,8351,8352,8353,8354,8355,8356,8357,8358,8359,8360,8361,8362,8364,8365,8366,8367,8368,8968,8969,8970,85235,85236,92815,121504,317772,440689,653604,3021,155382,648,1021,1029,1912,4217,7314,8535,23466,26523,84733,3006,3007,3008,3009,3024,3576,8091,246184,27161,2354,2790,9759,399694,4602,3276,7091,6604…	H2AC8,H2AC7,H2BC5,H2BC3,H4C9,H2AC13,H2AC15,H2AC14,H2AC16,H2AC6,H2AC4,H2AC17,H2AC20,H2BC13,H2BC15,H2BC14,H2BC9,H2BC17,H2BC21,H3C1,H3C4,H3C3,H3C6,H3C11,H3C8,H3C12,H3C10,H3C2,H4C1,H4C4,H4C6,H4C12,H4C3,H4C8,H4C2,H4C5,H4C13,H3C7,H2AC11,H2BC11,H2AC12,H2BC12,H2AW,H4-16,H2AC21,H2BC18,H3C13,H3-3B,VPS37D,BMI1,CDK6,CDKN2A,PHC2,MAP3K5,UBB,CBX4,CBX6,AGO1,CBX2,H1-2,H1-3,H1-4,H1-5,H1-1,CXCL8,HMGA2,CDC26,AGO2,FO…
1_Member	Reactome Gene Sets	R-HSA-3214815	HDACs deacetylate histones	-53.2256	-48.8789	47/94	3012,3013,3017,3018,8294,8329,8330,8331,8332,8334,8335,8336,8338,8340,8341,8342,8345,8348,8349,8350,8351,8352,8353,8354,8355,8356,8357,8358,8359,8360,8361,8362,8364,8365,8366,8367,8368,8968,8969,8970,85235,85236,92815,121504,317772,440689,653604	H2AC8,H2AC7,H2BC5,H2BC3,H4C9,H2AC13,H2AC15,H2AC14,H2AC16,H2AC6,H2AC4,H2AC17,H2AC20,H2BC13,H2BC15,H2BC14,H2BC9,H2BC17,H2BC21,H3C1,H3C4,H3C3,H3C6,H3C11,H3C8,H3C12,H3C10,H3C2,H4C1,H4C4,H4C6,H4C12,H4C3,H4C8,H4C2,H4C5,H4C13,H3C7,H2AC11,H2BC11,H2AC12,H2BC12,H2AW,H4-16,H2AC21,H2BC18,H3C13
1_Member	Reactome Gene Sets	R-HSA-73728	RNA Polymerase I Promoter Opening	-49.3175	-45.4165	39/63	3012,3013,3017,3018,3021,8294,8331,8334,8335,8338,8340,8341,8342,8345,8348,8349,8350,8351,8352,8353,8354,8355,8356,8357,8358,8359,8360,8361,8362,8364,8365,8366,8367,8368,8968,8970,85236,121504,653604	H2AC8,H2AC7,H2BC5,H2BC3,H3-3B,H4C9,H2AC14,H2AC6,H2AC4,H2AC20,H2BC13,H2BC15,H2BC14,H2BC9,H2BC17,H2BC21,H3C1,H3C4,H3C3,H3C6,H3C11,H3C8,H3C12,H3C10,H3C2,H4C1,H4C4,H4C6,H4C12,H4C3,H4C8,H4C2,H4C5,H4C13,H3C7,H2BC11,H2BC12,H4-16,H3C13
1_Member	Reactome Gene Sets	R-HSA-9610379	HCMV Late Events	-49.2861	-45.4165	48/116	3012,3013,3017,3018,8294,8329,8330,8331,8332,8334,8335,8336,8338,8340,8341,8342,8345,8348,8349,8350,8351,8352,8353,8354,8355,8356,8357,8358,8359,8360,8361,8362,8364,8365,8366,8367,8368,8968,8969,8970,85235,85236,92815,121504,155382,317772,440689,653604	H2AC8,H2AC7,H2BC5,H2BC3,H4C9,H2AC13,H2AC15,H2AC14,H2AC16,H2AC6,H2AC4,H2AC17,H2AC20,H2BC13,H2BC15,H2BC14,H2BC9,H2BC17,H2BC21,H3C1,H3C4,H3C3,H3C6,H3C11,H3C8,H3C12,H3C10,H3C2,H4C1,H4C4,H4C6,H4C12,H4C3,H4C8,H4C2,H4C5,H4C13,H3C7,H2AC11,H2BC11,H2AC12,H2BC12,H2AW,H4-16,VPS37D,H2AC21,H2BC18,H3C13
1_Member	Reactome Gene Sets	R-HSA-2559580	Oxidative Stress Induced Senescence	-48.8989	-45.1543	49/125	648,1021,1029,1912,3012,3013,3017,3018,3021,4217,7314,8294,8331,8334,8335,8338,8340,8341,8342,8345,8348,8349,8350,8351,8352,8353,8354,8355,8356,8357,8358,8359,8360,8361,8362,8364,8365,8366,8367,8368,8535,8968,8970,23466,26523,84733,85236,121504,653604	BMI1,CDK6,CDKN2A,PHC2,H2AC8,H2AC7,H2BC5,H2BC3,H3-3B,MAP3K5,UBB,H4C9,H2AC14,H2AC6,H2AC4,H2AC20,H2BC13,H2BC15,H2BC14,H2BC9,H2BC17,H2BC21,H3C1,H3C4,H3C3,H3C6,H3C11,H3C8,H3C12,H3C10,H3C2,H4C1,H4C4,H4C6,H4C12,H4C3,H4C8,H4C2,H4C5,H4C13,CBX4,H3C7,H2BC11,CBX6,AGO1,CBX2,H2BC12,H4-16,H3C13
1_Member	Reactome Gene Sets	R-HSA-5334118	DNA methylation	-48.5278	-44.8801	39/65	3012,3013,3017,3018,3021,8294,8331,8334,8335,8338,8340,8341,8342,8345,8348,8349,8350,8351,8352,8353,8354,8355,8356,8357,8358,8359,8360,8361,8362,8364,8365,8366,8367,8368,8968,8970,85236,121504,653604	H2AC8,H2AC7,H2BC5,H2BC3,H3-3B,H4C9,H2AC14,H2AC6,H2AC4,H2AC20,H2BC13,H2BC15,H2BC14,H2BC9,H2BC17,H2BC21,H3C1,H3C4,H3C3,H3C6,H3C11,H3C8,H3C12,H3C10,H3C2,H4C1,H4C4,H4C6,H4C12,H4C3,H4C8,H4C2,H4C5,H4C13,H3C7,H2BC11,H2BC12,H4-16,H3C13
1_Member	Reactome Gene Sets	R-HSA-2559583	Cellular Senescence	-48.1585	-44.59	57/197	648,1021,1029,1912,3006,3007,3008,3009,3012,3013,3017,3018,3021,3024,3576,4217,7314,8091,8294,8331,8334,8335,8338,8340,8341,8342,8345,8348,8349,8350,8351,8352,8353,8354,8355,8356,8357,8358,8359,8360,8361,8362,8364,8365,8366,8367,8368,8535,8968,8970,23466,26523,84733,85236,121504,246184,653604	BMI1,CDK6,CDKN2A,PHC2,H1-2,H1-3,H1-4,H1-5,H2AC8,H2AC7,H2BC5,H2BC3,H3-3B,H1-1,CXCL8,MAP3K5,UBB,HMGA2,H4C9,H2AC14,H2AC6,H2AC4,H2AC20,H2BC13,H2BC15,H2BC14,H2BC9,H2BC17,H2BC21,H3C1,H3C4,H3C3,H3C6,H3C11,H3C8,H3C12,H3C10,H3C2,H4C1,H4C4,H4C6,H4C12,H4C3,H4C8,H4C2,H4C5,H4C13,CBX4,H3C7,H2BC11,CBX6,AGO1,CBX2,H2BC12,H4-16,CDC26,H3C13
1_Member	Reactome Gene Sets	R-HSA-5625886	Activated PKN1 stimulates transcription of AR (androgen receptor) regulated genes KLK2 and KLK3	-47.7772	-44.2756	39/67	3012,3013,3017,3018,3021,8294,8331,8334,8335,8338,8340,8341,8342,8345,8348,8349,8350,8351,8352,8353,8354,8355,8356,8357,8358,8359,8360,8361,8362,8364,8365,8366,8367,8368,8968,8970,85236,121504,653604	H2AC8,H2AC7,H2BC5,H2BC3,H3-3B,H4C9,H2AC14,H2AC6,H2AC4,H2AC20,H2BC13,H2BC15,H2BC14,H2BC9,H2BC17,H2BC21,H3C1,H3C4,H3C3,H3C6,H3C11,H3C8,H3C12,H3C10,H3C2,H4C1,H4C4,H4C6,H4C12,H4C3,H4C8,H4C2,H4C5,H4C13,H3C7,H2BC11,H2BC12,H4-16,H3C13
1_Member	Reactome Gene Sets	R-HSA-427359	SIRT1 negatively regulates rRNA expression	-47.4153	-43.9717	39/68	3012,3013,3017,3018,3021,8294,8331,8334,8335,8338,8340,8341,8342,8345,8348,8349,8350,8351,8352,8353,8354,8355,8356,8357,8358,8359,8360,8361,8362,8364,8365,8366,8367,8368,8968,8970,85236,121504,653604	H2AC8,H2AC7,H2BC5,H2BC3,H3-3B,H4C9,H2AC14,H2AC6,H2AC4,H2AC20,H2BC13,H2BC15,H2BC14,H2BC9,H2BC17,H2BC21,H3C1,H3C4,H3C3,H3C6,H3C11,H3C8,H3C12,H3C10,H3C2,H4C1,H4C4,H4C6,H4C12,H4C3,H4C8,H4C2,H4C5,H4C13,H3C7,H2BC11,H2BC12,H4-16,H3C13
1_Member	Reactome Gene Sets	R-HSA-68616	Assembly of the ORC complex at the origin of replication	-47.0619	-43.6694	39/69	3012,3013,3017,3018,3021,8294,8331,8334,8335,8338,8340,8341,8342,8345,8348,8349,8350,8351,8352,8353,8354,8355,8356,8357,8358,8359,8360,8361,8362,8364,8365,8366,8367,8368,8968,8970,85236,121504,653604	H2AC8,H2AC7,H2BC5,H2BC3,H3-3B,H4C9,H2AC14,H2AC6,H2AC4,H2AC20,H2BC13,H2BC15,H2BC14,H2BC9,H2BC17,H2BC21,H3C1,H3C4,H3C3,H3C6,H3C11,H3C8,H3C12,H3C10,H3C2,H4C1,H4C4,H4C6,H4C12,H4C3,H4C8,H4C2,H4C5,H4C13,H3C7,H2BC11,H2BC12,H4-16,H3C13
1_Member	Reactome Gene Sets	R-HSA-212300	PRC2 methylates histones and DNA	-45.7244	-42.4191	39/73	3012,3013,3017,3018,3021,8294,8331,8334,8335,8338,8340,8341,8342,8345,8348,8349,8350,8351,8352,8353,8354,8355,8356,8357,8358,8359,8360,8361,8362,8364,8365,8366,8367,8368,8968,8970,85236,121504,653604	H2AC8,H2AC7,H2BC5,H2BC3,H3-3B,H4C9,H2AC14,H2AC6,H2AC4,H2AC20,H2BC13,H2BC15,H2BC14,H2BC9,H2BC17,H2BC21,H3C1,H3C4,H3C3,H3C6,H3C11,H3C8,H3C12,H3C10,H3C2,H4C1,H4C4,H4C6,H4C12,H4C3,H4C8,H4C2,H4C5,H4C13,H3C7,H2BC11,H2BC12,H4-16,H3C13
1_Member	Reactome Gene Sets	R-HSA-9710421	Defective pyroptosis	-45.7244	-42.4191	39/73	3012,3013,3017,3018,3021,8294,8331,8334,8335,8338,8340,8341,8342,8345,8348,8349,8350,8351,8352,8353,8354,8355,8356,8357,8358,8359,8360,8361,8362,8364,8365,8366,8367,8368,8968,8970,85236,121504,653604	H2AC8,H2AC7,H2BC5,H2BC3,H3-3B,H4C9,H2AC14,H2AC6,H2AC4,H2AC20,H2BC13,H2BC15,H2BC14,H2BC9,H2BC17,H2BC21,H3C1,H3C4,H3C3,H3C6,H3C11,H3C8,H3C12,H3C10,H3C2,H4C1,H4C4,H4C6,H4C12,H4C3,H4C8,H4C2,H4C5,H4C13,H3C7,H2BC11,H2BC12,H4-16,H3C13
1_Member	Reactome Gene Sets	R-HSA-2299718	Condensation of Prophase Chromosomes	-45.4074	-42.1399	39/74	3012,3013,3017,3018,3021,8294,8331,8334,8335,8338,8340,8341,8342,8345,8348,8349,8350,8351,8352,8353,8354,8355,8356,8357,8358,8359,8360,8361,8362,8364,8365,8366,8367,8368,8968,8970,85236,121504,653604	H2AC8,H2AC7,H2BC5,H2BC3,H3-3B,H4C9,H2AC14,H2AC6,H2AC4,H2AC20,H2BC13,H2BC15,H2BC14,H2BC9,H2BC17,H2BC21,H3C1,H3C4,H3C3,H3C6,H3C11,H3C8,H3C12,H3C10,H3C2,H4C1,H4C4,H4C6,H4C12,H4C3,H4C8,H4C2,H4C5,H4C13,H3C7,H2BC11,H2BC12,H4-16,H3C13
1_Member	KEGG Pathway	hsa05322	Systemic lupus erythematosus	-45.2906	-42.0579	48/136	3012,3013,3017,3018,3021,8294,8329,8330,8331,8332,8334,8335,8336,8338,8340,8341,8342,8345,8348,8349,8350,8351,8352,8353,8354,8355,8356,8357,8358,8359,8360,8361,8362,8364,8365,8366,8367,8368,8968,8969,8970,85235,85236,92815,121504,317772,440689,653604	H2AC8,H2AC7,H2BC5,H2BC3,H3-3B,H4C9,H2AC13,H2AC15,H2AC14,H2AC16,H2AC6,H2AC4,H2AC17,H2AC20,H2BC13,H2BC15,H2BC14,H2BC9,H2BC17,H2BC21,H3C1,H3C4,H3C3,H3C6,H3C11,H3C8,H3C12,H3C10,H3C2,H4C1,H4C4,H4C6,H4C12,H4C3,H4C8,H4C2,H4C5,H4C13,H3C7,H2AC11,H2BC11,H2AC12,H2BC12,H2AW,H4-16,H2AC21,H2BC18,H3C13
1_Member	Reactome Gene Sets	R-HSA-427389	ERCC6 (CSB) and EHMT2 (G9a) positively regulate rRNA expression	-44.7926	-41.592	39/76	3012,3013,3017,3018,3021,8294,8331,8334,8335,8338,8340,8341,8342,8345,8348,8349,8350,8351,8352,8353,8354,8355,8356,8357,8358,8359,8360,8361,8362,8364,8365,8366,8367,8368,8968,8970,85236,121504,653604	H2AC8,H2AC7,H2BC5,H2BC3,H3-3B,H4C9,H2AC14,H2AC6,H2AC4,H2AC20,H2BC13,H2BC15,H2BC14,H2BC9,H2BC17,H2BC21,H3C1,H3C4,H3C3,H3C6,H3C11,H3C8,H3C12,H3C10,H3C2,H4C1,H4C4,H4C6,H4C12,H4C3,H4C8,H4C2,H4C5,H4C13,H3C7,H2BC11,H2BC12,H4-16,H3C13
1_Member	Reactome Gene Sets	R-HSA-9609690	HCMV Early Events	-44.0232	-40.8526	47/135	3012,3013,3017,3018,8294,8329,8330,8331,8332,8334,8335,8336,8338,8340,8341,8342,8345,8348,8349,8350,8351,8352,8353,8354,8355,8356,8357,8358,8359,8360,8361,8362,8364,8365,8366,8367,8368,8968,8969,8970,85235,85236,92815,121504,317772,440689,653604	H2AC8,H2AC7,H2BC5,H2BC3,H4C9,H2AC13,H2AC15,H2AC14,H2AC16,H2AC6,H2AC4,H2AC17,H2AC20,H2BC13,H2BC15,H2BC14,H2BC9,H2BC17,H2BC21,H3C1,H3C4,H3C3,H3C6,H3C11,H3C8,H3C12,H3C10,H3C2,H4C1,H4C4,H4C6,H4C12,H4C3,H4C8,H4C2,H4C5,H4C13,H3C7,H2AC11,H2BC11,H2AC12,H2BC12,H2AW,H4-16,H2AC21,H2BC18,H3C13
1_Member	Reactome Gene Sets	R-HSA-2559582	Senescence-Associated Secretory Phenotype (SASP)	-43.9768	-40.8342	44/112	1021,1029,3012,3013,3017,3018,3021,3576,7314,8294,8331,8334,8335,8338,8340,8341,8342,8345,8348,8349,8350,8351,8352,8353,8354,8355,8356,8357,8358,8359,8360,8361,8362,8364,8365,8366,8367,8368,8968,8970,85236,121504,246184,653604	CDK6,CDKN2A,H2AC8,H2AC7,H2BC5,H2BC3,H3-3B,CXCL8,UBB,H4C9,H2AC14,H2AC6,H2AC4,H2AC20,H2BC13,H2BC15,H2BC14,H2BC9,H2BC17,H2BC21,H3C1,H3C4,H3C3,H3C6,H3C11,H3C8,H3C12,H3C10,H3C2,H4C1,H4C4,H4C6,H4C12,H4C3,H4C8,H4C2,H4C5,H4C13,H3C7,H2BC11,H2BC12,H4-16,CDC26,H3C13
1_Member	Reactome Gene Sets	R-HSA-1912408	Pre-NOTCH Transcription and Translation	-43.5405	-40.4242	41/93	3012,3013,3017,3018,3021,8294,8331,8334,8335,8338,8340,8341,8342,8345,8348,8349,8350,8351,8352,8353,8354,8355,8356,8357,8358,8359,8360,8361,8362,8364,8365,8366,8367,8368,8968,8970,26523,27161,85236,121504,653604	H2AC8,H2AC7,H2BC5,H2BC3,H3-3B,H4C9,H2AC14,H2AC6,H2AC4,H2AC20,H2BC13,H2BC15,H2BC14,H2BC9,H2BC17,H2BC21,H3C1,H3C4,H3C3,H3C6,H3C11,H3C8,H3C12,H3C10,H3C2,H4C1,H4C4,H4C6,H4C12,H4C3,H4C8,H4C2,H4C5,H4C13,H3C7,H2BC11,AGO1,AGO2,H2BC12,H4-16,H3C13
1_Member	KEGG Pathway	hsa05034	Alcoholism	-42.9401	-39.8487	52/187	2354,2790,3012,3013,3017,3018,3021,8294,8329,8330,8331,8332,8334,8335,8336,8338,8340,8341,8342,8345,8348,8349,8350,8351,8352,8353,8354,8355,8356,8357,8358,8359,8360,8361,8362,8364,8365,8366,8367,8368,8968,8969,8970,9759,85235,85236,92815,121504,317772,399694,440689,653604	FOSB,GNG10,H2AC8,H2AC7,H2BC5,H2BC3,H3-3B,H4C9,H2AC13,H2AC15,H2AC14,H2AC16,H2AC6,H2AC4,H2AC17,H2AC20,H2BC13,H2BC15,H2BC14,H2BC9,H2BC17,H2BC21,H3C1,H3C4,H3C3,H3C6,H3C11,H3C8,H3C12,H3C10,H3C2,H4C1,H4C4,H4C6,H4C12,H4C3,H4C8,H4C2,H4C5,H4C13,H3C7,H2AC11,H2BC11,HDAC4,H2AC12,H2BC12,H2AW,H4-16,H2AC21,SHC4,H2BC18,H3C13
1_Member	Reactome Gene Sets	R-HSA-3214847	HATs acetylate histones	-42.8256	-39.7576	47/142	3012,3013,3017,3018,8294,8329,8330,8331,8332,8334,8335,8336,8338,8340,8341,8342,8345,8348,8349,8350,8351,8352,8353,8354,8355,8356,8357,8358,8359,8360,8361,8362,8364,8365,8366,8367,8368,8968,8969,8970,85235,85236,92815,121504,317772,440689,653604	H2AC8,H2AC7,H2BC5,H2BC3,H4C9,H2AC13,H2AC15,H2AC14,H2AC16,H2AC6,H2AC4,H2AC17,H2AC20,H2BC13,H2BC15,H2BC14,H2BC9,H2BC17,H2BC21,H3C1,H3C4,H3C3,H3C6,H3C11,H3C8,H3C12,H3C10,H3C2,H4C1,H4C4,H4C6,H4C12,H4C3,H4C8,H4C2,H4C5,H4C13,H3C7,H2AC11,H2BC11,H2AC12,H2BC12,H2AW,H4-16,H2AC21,H2BC18,H3C13
1_Member	Reactome Gene Sets	R-HSA-9616222	Transcriptional regulation of granulopoiesis	-42.664	-39.6183	40/90	3012,3013,3017,3018,3021,4602,8294,8331,8334,8335,8338,8340,8341,8342,8345,8348,8349,8350,8351,8352,8353,8354,8355,8356,8357,8358,8359,8360,8361,8362,8364,8365,8366,8367,8368,8968,8970,85236,121504,653604	H2AC8,H2AC7,H2BC5,H2BC3,H3-3B,MYB,H4C9,H2AC14,H2AC6,H2AC4,H2AC20,H2BC13,H2BC15,H2BC14,H2BC9,H2BC17,H2BC21,H3C1,H3C4,H3C3,H3C6,H3C11,H3C8,H3C12,H3C10,H3C2,H4C1,H4C4,H4C6,H4C12,H4C3,H4C8,H4C2,H4C5,H4C13,H3C7,H2BC11,H2BC12,H4-16,H3C13
1_Member	Reactome Gene Sets	R-HSA-8936459	RUNX1 regulates genes involved in megakaryocyte differentiation and platelet function	-42.5988	-39.5743	41/97	3012,3013,3017,3018,3021,3276,8294,8331,8334,8335,8338,8340,8341,8342,8345,8348,8349,8350,8351,8352,8353,8354,8355,8356,8357,8358,8359,8360,8361,8362,8364,8365,8366,8367,8368,8968,8970,26523,85236,121504,653604	H2AC8,H2AC7,H2BC5,H2BC3,H3-3B,PRMT1,H4C9,H2AC14,H2AC6,H2AC4,H2AC20,H2BC13,H2BC15,H2BC14,H2BC9,H2BC17,H2BC21,H3C1,H3C4,H3C3,H3C6,H3C11,H3C8,H3C12,H3C10,H3C2,H4C1,H4C4,H4C6,H4C12,H4C3,H4C8,H4C2,H4C5,H4C13,H3C7,H2BC11,AGO1,H2BC12,H4-16,H3C13
1_Member	Reactome Gene Sets	R-HSA-201722	Formation of the beta-catenin:TCF transactivating complex	-42.4208	-39.4165	40/91	3012,3013,3017,3018,3021,7091,8294,8331,8334,8335,8338,8340,8341,8342,8345,8348,8349,8350,8351,8352,8353,8354,8355,8356,8357,8358,8359,8360,8361,8362,8364,8365,8366,8367,8368,8968,8970,85236,121504,653604	H2AC8,H2AC7,H2BC5,H2BC3,H3-3B,TLE4,H4C9,H2AC14,H2AC6,H2AC4,H2AC20,H2BC13,H2BC15,H2BC14,H2BC9,H2BC17,H2BC21,H3C1,H3C4,H3C3,H3C6,H3C11,H3C8,H3C12,H3C10,H3C2,H4C1,H4C4,H4C6,H4C12,H4C3,H4C8,H4C2,H4C5,H4C13,H3C7,H2BC11,H2BC12,H4-16,H3C13
1_Member	Reactome Gene Sets	R-HSA-3214858	RMTs methylate histone arginines	-42.2304	-39.2454	38/79	3012,3013,3276,6604,8294,8329,8330,8331,8332,8334,8335,8336,8338,8350,8351,8352,8353,8354,8355,8356,8357,8358,8359,8360,8361,8362,8364,8365,8366,8367,8368,8968,8969,85235,92815,121504,317772,653604	H2AC8,H2AC7,PRMT1,SMARCD3,H4C9,H2AC13,H2AC15,H2AC14,H2AC16,H2AC6,H2AC4,H2AC17,H2AC20,H3C1,H3C4,H3C3,H3C6,H3C11,H3C8,H3C12,H3C10,H3C2,H4C1,H4C4,H4C6,H4C12,H4C3,H4C8,H4C2,H4C5,H4C13,H3C7,H2AC11,H2AC12,H2AW,H4-16,H2AC21,H3C13
1_Member	Reactome Gene Sets	R-HSA-912446	Meiotic recombination	-42.0402	-39.0737	39/86	3012,3013,3017,3018,3021,8294,8331,8334,8335,8338,8340,8341,8342,8345,8348,8349,8350,8351,8352,8353,8354,8355,8356,8357,8358,8359,8360,8361,8362,8364,8365,8366,8367,8368,8968,8970,85236,121504,653604	H2AC8,H2AC7,H2BC5,H2BC3,H3-3B,H4C9,H2AC14,H2AC6,H2AC4,H2AC20,H2BC13,H2BC15,H2BC14,H2BC9,H2BC17,H2BC21,H3C1,H3C4,H3C3,H3C6,H3C11,H3C8,H3C12,H3C10,H3C2,H4C1,H4C4,H4C6,H4C12,H4C3,H4C8,H4C2,H4C5,H4C13,H3C7,H2BC11,H2BC12,H4-16,H3C13
1_Member	Reactome Gene Sets	R-HSA-8878171	Transcriptional regulation by RUNX1	-41.7507	-38.8019	56/239	648,894,1021,1912,3012,3013,3017,3018,3021,3276,4602,5692,5714,6604,7314,8294,8331,8334,8335,8338,8340,8341,8342,8345,8348,8349,8350,8351,8352,8353,8354,8355,8356,8357,8358,8359,8360,8361,8362,8364,8365,8366,8367,8368,8535,8968,8970,9021,23466,26523,27161,28996,84733,85236,121504,653604	BMI1,CCND2,CDK6,PHC2,H2AC8,H2AC7,H2BC5,H2BC3,H3-3B,PRMT1,MYB,PSMB4,PSMD8,SMARCD3,UBB,H4C9,H2AC14,H2AC6,H2AC4,H2AC20,H2BC13,H2BC15,H2BC14,H2BC9,H2BC17,H2BC21,H3C1,H3C4,H3C3,H3C6,H3C11,H3C8,H3C12,H3C10,H3C2,H4C1,H4C4,H4C6,H4C12,H4C3,H4C8,H4C2,H4C5,H4C13,CBX4,H3C7,H2BC11,SOCS3,CBX6,AGO1,AGO2,HIPK2,CBX2,H2BC12,H4-16,H3C13
1_Member	Reactome Gene Sets	R-HSA-5625740	RHO GTPases activate PKNs	-41.4837	-38.552	40/95	388,3012,3013,3017,3018,3021,8294,8331,8334,8335,8338,8340,8341,8342,8345,8348,8349,8350,8351,8352,8353,8354,8355,8356,8357,8358,8359,8360,8361,8362,8364,8365,8366,8367,8368,8968,8970,85236,121504,653604	RHOB,H2AC8,H2AC7,H2BC5,H2BC3,H3-3B,H4C9,H2AC14,H2AC6,H2AC4,H2AC20,H2BC13,H2BC15,H2BC14,H2BC9,H2BC17,H2BC21,H3C1,H3C4,H3C3,H3C6,H3C11,H3C8,H3C12,H3C10,H3C2,H4C1,H4C4,H4C6,H4C12,H4C3,H4C8,H4C2,H4C5,H4C13,H3C7,H2BC11,H2BC12,H4-16,H3C13
1_Member	Reactome Gene Sets	R-HSA-9609646	HCMV Infection	-41.4039	-38.4886	48/160	3012,3013,3017,3018,8294,8329,8330,8331,8332,8334,8335,8336,8338,8340,8341,8342,8345,8348,8349,8350,8351,8352,8353,8354,8355,8356,8357,8358,8359,8360,8361,8362,8364,8365,8366,8367,8368,8968,8969,8970,85235,85236,92815,121504,155382,317772,440689,653604	H2AC8,H2AC7,H2BC5,H2BC3,H4C9,H2AC13,H2AC15,H2AC14,H2AC16,H2AC6,H2AC4,H2AC17,H2AC20,H2BC13,H2BC15,H2BC14,H2BC9,H2BC17,H2BC21,H3C1,H3C4,H3C3,H3C6,H3C11,H3C8,H3C12,H3C10,H3C2,H4C1,H4C4,H4C6,H4C12,H4C3,H4C8,H4C2,H4C5,H4C13,H3C7,H2AC11,H2BC11,H2AC12,H2BC12,H2AW,H4-16,VPS37D,H2AC21,H2BC18,H3C13
1_Member	Reactome Gene Sets	R-HSA-9645723	Diseases of programmed cell death	-41.2816	-38.3821	41/103	708,1029,3012,3013,3017,3018,3021,8294,8331,8334,8335,8338,8340,8341,8342,8345,8348,8349,8350,8351,8352,8353,8354,8355,8356,8357,8358,8359,8360,8361,8362,8364,8365,8366,8367,8368,8968,8970,85236,121504,653604	C1QBP,CDKN2A,H2AC8,H2AC7,H2BC5,H2BC3,H3-3B,H4C9,H2AC14,H2AC6,H2AC4,H2AC20,H2BC13,H2BC15,H2BC14,H2BC9,H2BC17,H2BC21,H3C1,H3C4,H3C3,H3C6,H3C11,H3C8,H3C12,H3C10,H3C2,H4C1,H4C4,H4C6,H4C12,H4C3,H4C8,H4C2,H4C5,H4C13,H3C7,H2BC11,H2BC12,H4-16,H3C13
1_Member	KEGG Pathway	hsa04613	Neutrophil extracellular trap formation	-41.2585	-38.3742	51/190	3012,3013,3017,3018,3021,6404,8294,8329,8330,8331,8332,8334,8335,8336,8338,8340,8341,8342,8345,8348,8349,8350,8351,8352,8353,8354,8355,8356,8357,8358,8359,8360,8361,8362,8364,8365,8366,8367,8368,8503,8968,8969,8970,9759,85235,85236,92815,121504,317772,440689,653604	H2AC8,H2AC7,H2BC5,H2BC3,H3-3B,SELPLG,H4C9,H2AC13,H2AC15,H2AC14,H2AC16,H2AC6,H2AC4,H2AC17,H2AC20,H2BC13,H2BC15,H2BC14,H2BC9,H2BC17,H2BC21,H3C1,H3C4,H3C3,H3C6,H3C11,H3C8,H3C12,H3C10,H3C2,H4C1,H4C4,H4C6,H4C12,H4C3,H4C8,H4C2,H4C5,H4C13,PIK3R3,H3C7,H2AC11,H2BC11,HDAC4,H2AC12,H2BC12,H2AW,H4-16,H2AC21,H2BC18,H3C13
1_Member	Reactome Gene Sets	R-HSA-977225	Amyloid fiber formation	-41.163	-38.2934	42/111	3012,3013,3017,3018,3021,7314,8294,8331,8334,8335,8338,8340,8341,8342,8345,8348,8349,8350,8351,8352,8353,8354,8355,8356,8357,8358,8359,8360,8361,8362,8364,8365,8366,8367,8368,8968,8970,10098,81619,85236,121504,653604	H2AC8,H2AC7,H2BC5,H2BC3,H3-3B,UBB,H4C9,H2AC14,H2AC6,H2AC4,H2AC20,H2BC13,H2BC15,H2BC14,H2BC9,H2BC17,H2BC21,H3C1,H3C4,H3C3,H3C6,H3C11,H3C8,H3C12,H3C10,H3C2,H4C1,H4C4,H4C6,H4C12,H4C3,H4C8,H4C2,H4C5,H4C13,H3C7,H2BC11,TSPAN5,TSPAN14,H2BC12,H4-16,H3C13
1_Member	Reactome Gene Sets	R-HSA-5250924	B-WICH complex positively regulates rRNA expression	-40.8287	-37.9872	39/91	3012,3013,3017,3018,3021,8294,8331,8334,8335,8338,8340,8341,8342,8345,8348,8349,8350,8351,8352,8353,8354,8355,8356,8357,8358,8359,8360,8361,8362,8364,8365,8366,8367,8368,8968,8970,85236,121504,653604	H2AC8,H2AC7,H2BC5,H2BC3,H3-3B,H4C9,H2AC14,H2AC6,H2AC4,H2AC20,H2BC13,H2BC15,H2BC14,H2BC9,H2BC17,H2BC21,H3C1,H3C4,H3C3,H3C6,H3C11,H3C8,H3C12,H3C10,H3C2,H4C1,H4C4,H4C6,H4C12,H4C3,H4C8,H4C2,H4C5,H4C13,H3C7,H2BC11,H2BC12,H4-16,H3C13
1_Member	Reactome Gene Sets	R-HSA-73772	RNA Polymerase I Promoter Escape	-40.8287	-37.9872	39/91	3012,3013,3017,3018,3021,8294,8331,8334,8335,8338,8340,8341,8342,8345,8348,8349,8350,8351,8352,8353,8354,8355,8356,8357,8358,8359,8360,8361,8362,8364,8365,8366,8367,8368,8968,8970,85236,121504,653604	H2AC8,H2AC7,H2BC5,H2BC3,H3-3B,H4C9,H2AC14,H2AC6,H2AC4,H2AC20,H2BC13,H2BC15,H2BC14,H2BC9,H2BC17,H2BC21,H3C1,H3C4,H3C3,H3C6,H3C11,H3C8,H3C12,H3C10,H3C2,H4C1,H4C4,H4C6,H4C12,H4C3,H4C8,H4C2,H4C5,H4C13,H3C7,H2BC11,H2BC12,H4-16,H3C13
1_Member	Reactome Gene Sets	R-HSA-5578749	Transcriptional regulation by small RNAs	-40.6612	-37.833	41/106	3012,3013,3017,3018,3021,8294,8331,8334,8335,8338,8340,8341,8342,8345,8348,8349,8350,8351,8352,8353,8354,8355,8356,8357,8358,8359,8360,8361,8362,8364,8365,8366,8367,8368,8968,8970,26523,27161,85236,121504,653604	H2AC8,H2AC7,H2BC5,H2BC3,H3-3B,H4C9,H2AC14,H2AC6,H2AC4,H2AC20,H2BC13,H2BC15,H2BC14,H2BC9,H2BC17,H2BC21,H3C1,H3C4,H3C3,H3C6,H3C11,H3C8,H3C12,H3C10,H3C2,H4C1,H4C4,H4C6,H4C12,H4C3,H4C8,H4C2,H4C5,H4C13,H3C7,H2BC11,AGO1,AGO2,H2BC12,H4-16,H3C13
1_Member	Reactome Gene Sets	R-HSA-1912422	Pre-NOTCH Expression and Processing	-40.0638	-37.2486	41/109	3012,3013,3017,3018,3021,8294,8331,8334,8335,8338,8340,8341,8342,8345,8348,8349,8350,8351,8352,8353,8354,8355,8356,8357,8358,8359,8360,8361,8362,8364,8365,8366,8367,8368,8968,8970,26523,27161,85236,121504,653604	H2AC8,H2AC7,H2BC5,H2BC3,H3-3B,H4C9,H2AC14,H2AC6,H2AC4,H2AC20,H2BC13,H2BC15,H2BC14,H2BC9,H2BC17,H2BC21,H3C1,H3C4,H3C3,H3C6,H3C11,H3C8,H3C12,H3C10,H3C2,H4C1,H4C4,H4C6,H4C12,H4C3,H4C8,H4C2,H4C5,H4C13,H3C7,H2BC11,AGO1,AGO2,H2BC12,H4-16,H3C13
1_Member	Reactome Gene Sets	R-HSA-8939236	RUNX1 regulates transcription of genes involved in differentiation of HSCs	-39.1867	-36.3841	43/130	3012,3013,3017,3018,3021,4602,5692,5714,7314,8294,8331,8334,8335,8338,8340,8341,8342,8345,8348,8349,8350,8351,8352,8353,8354,8355,8356,8357,8358,8359,8360,8361,8362,8364,8365,8366,8367,8368,8968,8970,85236,121504,653604	H2AC8,H2AC7,H2BC5,H2BC3,H3-3B,MYB,PSMB4,PSMD8,UBB,H4C9,H2AC14,H2AC6,H2AC4,H2AC20,H2BC13,H2BC15,H2BC14,H2BC9,H2BC17,H2BC21,H3C1,H3C4,H3C3,H3C6,H3C11,H3C8,H3C12,H3C10,H3C2,H4C1,H4C4,H4C6,H4C12,H4C3,H4C8,H4C2,H4C5,H4C13,H3C7,H2BC11,H2BC12,H4-16,H3C13
1_Member	Reactome Gene Sets	R-HSA-68867	Assembly of the pre-replicative complex	-37.7899	-34.9995	42/130	3012,3013,3017,3018,3021,5692,5714,7314,8294,8331,8334,8335,8338,8340,8341,8342,8345,8348,8349,8350,8351,8352,8353,8354,8355,8356,8357,8358,8359,8360,8361,8362,8364,8365,8366,8367,8368,8968,8970,85236,121504,653604	H2AC8,H2AC7,H2BC5,H2BC3,H3-3B,PSMB4,PSMD8,UBB,H4C9,H2AC14,H2AC6,H2AC4,H2AC20,H2BC13,H2BC15,H2BC14,H2BC9,H2BC17,H2BC21,H3C1,H3C4,H3C3,H3C6,H3C11,H3C8,H3C12,H3C10,H3C2,H4C1,H4C4,H4C6,H4C12,H4C3,H4C8,H4C2,H4C5,H4C13,H3C7,H2BC11,H2BC12,H4-16,H3C13
1_Member	Reactome Gene Sets	R-HSA-5250913	Positive epigenetic regulation of rRNA expression	-37.6796	-34.9011	39/106	3012,3013,3017,3018,3021,8294,8331,8334,8335,8338,8340,8341,8342,8345,8348,8349,8350,8351,8352,8353,8354,8355,8356,8357,8358,8359,8360,8361,8362,8364,8365,8366,8367,8368,8968,8970,85236,121504,653604	H2AC8,H2AC7,H2BC5,H2BC3,H3-3B,H4C9,H2AC14,H2AC6,H2AC4,H2AC20,H2BC13,H2BC15,H2BC14,H2BC9,H2BC17,H2BC21,H3C1,H3C4,H3C3,H3C6,H3C11,H3C8,H3C12,H3C10,H3C2,H4C1,H4C4,H4C6,H4C12,H4C3,H4C8,H4C2,H4C5,H4C13,H3C7,H2BC11,H2BC12,H4-16,H3C13
1_Member	Reactome Gene Sets	R-HSA-9018519	Estrogen-dependent gene expression	-37.4924	-34.7353	44/150	2354,3012,3013,3017,3018,3021,3276,4602,8294,8331,8334,8335,8338,8340,8341,8342,8345,8348,8349,8350,8351,8352,8353,8354,8355,8356,8357,8358,8359,8360,8361,8362,8364,8365,8366,8367,8368,8968,8970,26523,27161,85236,121504,653604	FOSB,H2AC8,H2AC7,H2BC5,H2BC3,H3-3B,PRMT1,MYB,H4C9,H2AC14,H2AC6,H2AC4,H2AC20,H2BC13,H2BC15,H2BC14,H2BC9,H2BC17,H2BC21,H3C1,H3C4,H3C3,H3C6,H3C11,H3C8,H3C12,H3C10,H3C2,H4C1,H4C4,H4C6,H4C12,H4C3,H4C8,H4C2,H4C5,H4C13,H3C7,H2BC11,AGO1,AGO2,H2BC12,H4-16,H3C13
1_Member	Reactome Gene Sets	R-HSA-427413	NoRC negatively regulates rRNA expression	-37.4909	-34.7353	39/107	3012,3013,3017,3018,3021,8294,8331,8334,8335,8338,8340,8341,8342,8345,8348,8349,8350,8351,8352,8353,8354,8355,8356,8357,8358,8359,8360,8361,8362,8364,8365,8366,8367,8368,8968,8970,85236,121504,653604	H2AC8,H2AC7,H2BC5,H2BC3,H3-3B,H4C9,H2AC14,H2AC6,H2AC4,H2AC20,H2BC13,H2BC15,H2BC14,H2BC9,H2BC17,H2BC21,H3C1,H3C4,H3C3,H3C6,H3C11,H3C8,H3C12,H3C10,H3C2,H4C1,H4C4,H4C6,H4C12,H4C3,H4C8,H4C2,H4C5,H4C13,H3C7,H2BC11,H2BC12,H4-16,H3C13
1_Member	Reactome Gene Sets	R-HSA-5250941	Negative epigenetic regulation of rRNA expression	-36.9387	-34.2048	39/110	3012,3013,3017,3018,3021,8294,8331,8334,8335,8338,8340,8341,8342,8345,8348,8349,8350,8351,8352,8353,8354,8355,8356,8357,8358,8359,8360,8361,8362,8364,8365,8366,8367,8368,8968,8970,85236,121504,653604	H2AC8,H2AC7,H2BC5,H2BC3,H3-3B,H4C9,H2AC14,H2AC6,H2AC4,H2AC20,H2BC13,H2BC15,H2BC14,H2BC9,H2BC17,H2BC21,H3C1,H3C4,H3C3,H3C6,H3C11,H3C8,H3C12,H3C10,H3C2,H4C1,H4C4,H4C6,H4C12,H4C3,H4C8,H4C2,H4C5,H4C13,H3C7,H2BC11,H2BC12,H4-16,H3C13
1_Member	Reactome Gene Sets	R-HSA-73854	RNA Polymerase I Promoter Clearance	-36.9387	-34.2048	39/110	3012,3013,3017,3018,3021,8294,8331,8334,8335,8338,8340,8341,8342,8345,8348,8349,8350,8351,8352,8353,8354,8355,8356,8357,8358,8359,8360,8361,8362,8364,8365,8366,8367,8368,8968,8970,85236,121504,653604	H2AC8,H2AC7,H2BC5,H2BC3,H3-3B,H4C9,H2AC14,H2AC6,H2AC4,H2AC20,H2BC13,H2BC15,H2BC14,H2BC9,H2BC17,H2BC21,H3C1,H3C4,H3C3,H3C6,H3C11,H3C8,H3C12,H3C10,H3C2,H4C1,H4C4,H4C6,H4C12,H4C3,H4C8,H4C2,H4C5,H4C13,H3C7,H2BC11,H2BC12,H4-16,H3C13
1_Member	Reactome Gene Sets	R-HSA-73864	RNA Polymerase I Transcription	-36.5813	-33.8579	39/112	3012,3013,3017,3018,3021,8294,8331,8334,8335,8338,8340,8341,8342,8345,8348,8349,8350,8351,8352,8353,8354,8355,8356,8357,8358,8359,8360,8361,8362,8364,8365,8366,8367,8368,8968,8970,85236,121504,653604	H2AC8,H2AC7,H2BC5,H2BC3,H3-3B,H4C9,H2AC14,H2AC6,H2AC4,H2AC20,H2BC13,H2BC15,H2BC14,H2BC9,H2BC17,H2BC21,H3C1,H3C4,H3C3,H3C6,H3C11,H3C8,H3C12,H3C10,H3C2,H4C1,H4C4,H4C6,H4C12,H4C3,H4C8,H4C2,H4C5,H4C13,H3C7,H2BC11,H2BC12,H4-16,H3C13
1_Member	Reactome Gene Sets	R-HSA-1500620	Meiosis	-35.557	-32.8437	39/118	3012,3013,3017,3018,3021,8294,8331,8334,8335,8338,8340,8341,8342,8345,8348,8349,8350,8351,8352,8353,8354,8355,8356,8357,8358,8359,8360,8361,8362,8364,8365,8366,8367,8368,8968,8970,85236,121504,653604	H2AC8,H2AC7,H2BC5,H2BC3,H3-3B,H4C9,H2AC14,H2AC6,H2AC4,H2AC20,H2BC13,H2BC15,H2BC14,H2BC9,H2BC17,H2BC21,H3C1,H3C4,H3C3,H3C6,H3C11,H3C8,H3C12,H3C10,H3C2,H4C1,H4C4,H4C6,H4C12,H4C3,H4C8,H4C2,H4C5,H4C13,H3C7,H2BC11,H2BC12,H4-16,H3C13
1_Member	Reactome Gene Sets	R-HSA-69002	DNA Replication Pre-Initiation	-35.2689	-32.5657	42/147	3012,3013,3017,3018,3021,5692,5714,7314,8294,8331,8334,8335,8338,8340,8341,8342,8345,8348,8349,8350,8351,8352,8353,8354,8355,8356,8357,8358,8359,8360,8361,8362,8364,8365,8366,8367,8368,8968,8970,85236,121504,653604	H2AC8,H2AC7,H2BC5,H2BC3,H3-3B,PSMB4,PSMD8,UBB,H4C9,H2AC14,H2AC6,H2AC4,H2AC20,H2BC13,H2BC15,H2BC14,H2BC9,H2BC17,H2BC21,H3C1,H3C4,H3C3,H3C6,H3C11,H3C8,H3C12,H3C10,H3C2,H4C1,H4C4,H4C6,H4C12,H4C3,H4C8,H4C2,H4C5,H4C13,H3C7,H2BC11,H2BC12,H4-16,H3C13
1_Member	Reactome Gene Sets	R-HSA-211000	Gene Silencing by RNA	-35.2111	-32.5176	41/138	3012,3013,3017,3018,3021,8294,8331,8334,8335,8338,8340,8341,8342,8345,8348,8349,8350,8351,8352,8353,8354,8355,8356,8357,8358,8359,8360,8361,8362,8364,8365,8366,8367,8368,8968,8970,26523,27161,85236,121504,653604	H2AC8,H2AC7,H2BC5,H2BC3,H3-3B,H4C9,H2AC14,H2AC6,H2AC4,H2AC20,H2BC13,H2BC15,H2BC14,H2BC9,H2BC17,H2BC21,H3C1,H3C4,H3C3,H3C6,H3C11,H3C8,H3C12,H3C10,H3C2,H4C1,H4C4,H4C6,H4C12,H4C3,H4C8,H4C2,H4C5,H4C13,H3C7,H2BC11,AGO1,AGO2,H2BC12,H4-16,H3C13
1_Member	Reactome Gene Sets	R-HSA-5617472	Activation of anterior HOX genes in hindbrain development during early embryogenesis	-35.0696	-32.395	39/121	3012,3013,3017,3018,3021,8294,8331,8334,8335,8338,8340,8341,8342,8345,8348,8349,8350,8351,8352,8353,8354,8355,8356,8357,8358,8359,8360,8361,8362,8364,8365,8366,8367,8368,8968,8970,85236,121504,653604	H2AC8,H2AC7,H2BC5,H2BC3,H3-3B,H4C9,H2AC14,H2AC6,H2AC4,H2AC20,H2BC13,H2BC15,H2BC14,H2BC9,H2BC17,H2BC21,H3C1,H3C4,H3C3,H3C6,H3C11,H3C8,H3C12,H3C10,H3C2,H4C1,H4C4,H4C6,H4C12,H4C3,H4C8,H4C2,H4C5,H4C13,H3C7,H2BC11,H2BC12,H4-16,H3C13
1_Member	Reactome Gene Sets	R-HSA-5619507	Activation of HOX genes during differentiation	-35.0696	-32.395	39/121	3012,3013,3017,3018,3021,8294,8331,8334,8335,8338,8340,8341,8342,8345,8348,8349,8350,8351,8352,8353,8354,8355,8356,8357,8358,8359,8360,8361,8362,8364,8365,8366,8367,8368,8968,8970,85236,121504,653604	H2AC8,H2AC7,H2BC5,H2BC3,H3-3B,H4C9,H2AC14,H2AC6,H2AC4,H2AC20,H2BC13,H2BC15,H2BC14,H2BC9,H2BC17,H2BC21,H3C1,H3C4,H3C3,H3C6,H3C11,H3C8,H3C12,H3C10,H3C2,H4C1,H4C4,H4C6,H4C12,H4C3,H4C8,H4C2,H4C5,H4C13,H3C7,H2BC11,H2BC12,H4-16,H3C13
1_Member	GO Biological Processes	GO:0006334	nucleosome assembly	-34.4433	-31.7779	39/125	3006,3007,3008,3009,3017,3018,3021,3024,8294,8340,8341,8342,8345,8348,8349,8350,8351,8352,8353,8354,8355,8356,8357,8358,8359,8360,8361,8362,8364,8365,8366,8367,8368,8968,8970,85236,121504,440689,653604	H1-2,H1-3,H1-4,H1-5,H2BC5,H2BC3,H3-3B,H1-1,H4C9,H2BC13,H2BC15,H2BC14,H2BC9,H2BC17,H2BC21,H3C1,H3C4,H3C3,H3C6,H3C11,H3C8,H3C12,H3C10,H3C2,H4C1,H4C4,H4C6,H4C12,H4C3,H4C8,H4C2,H4C5,H4C13,H3C7,H2BC11,H2BC12,H4-16,H2BC18,H3C13
1_Member	Reactome Gene Sets	R-HSA-8939211	ESR-mediated signaling	-33.9509	-31.2944	48/223	1839,2069,2354,2790,3012,3013,3017,3018,3021,3276,4602,8294,8331,8334,8335,8338,8340,8341,8342,8345,8348,8349,8350,8351,8352,8353,8354,8355,8356,8357,8358,8359,8360,8361,8362,8364,8365,8366,8367,8368,8503,8968,8970,26523,27161,85236,121504,653604	HBEGF,EREG,FOSB,GNG10,H2AC8,H2AC7,H2BC5,H2BC3,H3-3B,PRMT1,MYB,H4C9,H2AC14,H2AC6,H2AC4,H2AC20,H2BC13,H2BC15,H2BC14,H2BC9,H2BC17,H2BC21,H3C1,H3C4,H3C3,H3C6,H3C11,H3C8,H3C12,H3C10,H3C2,H4C1,H4C4,H4C6,H4C12,H4C3,H4C8,H4C2,H4C5,H4C13,PIK3R3,H3C7,H2BC11,AGO1,AGO2,H2BC12,H4-16,H3C13
1_Member	Reactome Gene Sets	R-HSA-2559586	DNA Damage/Telomere Stress Induced Senescence	-33.9282	-31.2805	33/80	3006,3007,3008,3009,3012,3013,3017,3018,3024,8091,8294,8331,8334,8335,8338,8340,8341,8342,8345,8348,8349,8359,8360,8361,8362,8364,8365,8366,8367,8368,8970,85236,121504	H1-2,H1-3,H1-4,H1-5,H2AC8,H2AC7,H2BC5,H2BC3,H1-1,HMGA2,H4C9,H2AC14,H2AC6,H2AC4,H2AC20,H2BC13,H2BC15,H2BC14,H2BC9,H2BC17,H2BC21,H4C1,H4C4,H4C6,H4C12,H4C3,H4C8,H4C2,H4C5,H4C13,H2BC11,H2BC12,H4-16
1_Member	Reactome Gene Sets	R-HSA-157118	Signaling by NOTCH	-32.7354	-30.0963	48/236	3012,3013,3017,3018,3021,3714,4192,5692,5714,7091,7314,8294,8331,8334,8335,8338,8340,8341,8342,8345,8348,8349,8350,8351,8352,8353,8354,8355,8356,8357,8358,8359,8360,8361,8362,8364,8365,8366,8367,8368,8968,8970,9759,26523,27161,85236,121504,653604	H2AC8,H2AC7,H2BC5,H2BC3,H3-3B,JAG2,MDK,PSMB4,PSMD8,TLE4,UBB,H4C9,H2AC14,H2AC6,H2AC4,H2AC20,H2BC13,H2BC15,H2BC14,H2BC9,H2BC17,H2BC21,H3C1,H3C4,H3C3,H3C6,H3C11,H3C8,H3C12,H3C10,H3C2,H4C1,H4C4,H4C6,H4C12,H4C3,H4C8,H4C2,H4C5,H4C13,H3C7,H2BC11,HDAC4,AGO1,AGO2,H2BC12,H4-16,H3C13
1_Member	Reactome Gene Sets	R-HSA-8953897	Cellular responses to stimuli	-32.3918	-29.7611	80/771	467,648,1021,1029,1465,1912,3006,3007,3008,3009,3012,3013,3017,3018,3021,3024,3576,4217,4493,4494,5692,5714,6170,6171,6175,6193,6218,6224,6228,6230,6235,6604,7314,8091,8294,8331,8334,8335,8338,8340,8341,8342,8345,8348,8349,8350,8351,8352,8353,8354,8355,8356,8357,8358,8359,8360,8361,8362,8364,8365,8366,8367,8368,8535,8968,8970,8994,10525,23466,26523,51241,84733,85236,112398,112399,116228,121504,12…	ATF3,BMI1,CDK6,CDKN2A,CSRP1,PHC2,H1-2,H1-3,H1-4,H1-5,H2AC8,H2AC7,H2BC5,H2BC3,H3-3B,H1-1,CXCL8,MAP3K5,MT1E,MT1F,PSMB4,PSMD8,RPL39,RPL41,RPLP0,RPS5,RPS17,RPS20,RPS23,RPS25,RPS29,SMARCD3,UBB,HMGA2,H4C9,H2AC14,H2AC6,H2AC4,H2AC20,H2BC13,H2BC15,H2BC14,H2BC9,H2BC17,H2BC21,H3C1,H3C4,H3C3,H3C6,H3C11,H3C8,H3C12,H3C10,H3C2,H4C1,H4C4,H4C6,H4C12,H4C3,H4C8,H4C2,H4C5,H4C13,CBX4,H3C7,H2BC11,LIMD1,HYOU1,CBX6,AGO1…
1_Member	GO Biological Processes	GO:0006333	chromatin assembly or disassembly	-32.0822	-29.4598	44/195	3006,3007,3008,3009,3017,3018,3021,3024,6604,8091,8294,8340,8341,8342,8345,8348,8349,8350,8351,8352,8353,8354,8355,8356,8357,8358,8359,8360,8361,8362,8364,8365,8366,8367,8368,8968,8970,57673,85236,92815,121504,201161,440689,653604	H1-2,H1-3,H1-4,H1-5,H2BC5,H2BC3,H3-3B,H1-1,SMARCD3,HMGA2,H4C9,H2BC13,H2BC15,H2BC14,H2BC9,H2BC17,H2BC21,H3C1,H3C4,H3C3,H3C6,H3C11,H3C8,H3C12,H3C10,H3C2,H4C1,H4C4,H4C6,H4C12,H4C3,H4C8,H4C2,H4C5,H4C13,H3C7,H2BC11,BEND3,H2BC12,H2AW,H4-16,CENPV,H2BC18,H3C13
1_Member	Reactome Gene Sets	R-HSA-68875	Mitotic Prophase	-32.0394	-29.4251	39/142	3012,3013,3017,3018,3021,8294,8331,8334,8335,8338,8340,8341,8342,8345,8348,8349,8350,8351,8352,8353,8354,8355,8356,8357,8358,8359,8360,8361,8362,8364,8365,8366,8367,8368,8968,8970,85236,121504,653604	H2AC8,H2AC7,H2BC5,H2BC3,H3-3B,H4C9,H2AC14,H2AC6,H2AC4,H2AC20,H2BC13,H2BC15,H2BC14,H2BC9,H2BC17,H2BC21,H3C1,H3C4,H3C3,H3C6,H3C11,H3C8,H3C12,H3C10,H3C2,H4C1,H4C4,H4C6,H4C12,H4C3,H4C8,H4C2,H4C5,H4C13,H3C7,H2BC11,H2BC12,H4-16,H3C13
1_Member	Reactome Gene Sets	R-HSA-1474165	Reproduction	-31.9093	-29.303	39/143	3012,3013,3017,3018,3021,8294,8331,8334,8335,8338,8340,8341,8342,8345,8348,8349,8350,8351,8352,8353,8354,8355,8356,8357,8358,8359,8360,8361,8362,8364,8365,8366,8367,8368,8968,8970,85236,121504,653604	H2AC8,H2AC7,H2BC5,H2BC3,H3-3B,H4C9,H2AC14,H2AC6,H2AC4,H2AC20,H2BC13,H2BC15,H2BC14,H2BC9,H2BC17,H2BC21,H3C1,H3C4,H3C3,H3C6,H3C11,H3C8,H3C12,H3C10,H3C2,H4C1,H4C4,H4C6,H4C12,H4C3,H4C8,H4C2,H4C5,H4C13,H3C7,H2BC11,H2BC12,H4-16,H3C13
1_Member	Reactome Gene Sets	R-HSA-201681	TCF dependent signaling in response to WNT	-31.8863	-29.2878	47/233	2535,3012,3013,3017,3018,3021,4041,5692,5714,6657,7091,7314,8294,8331,8334,8335,8338,8340,8341,8342,8345,8348,8349,8350,8351,8352,8353,8354,8355,8356,8357,8358,8359,8360,8361,8362,8364,8365,8366,8367,8368,8968,8970,84133,85236,121504,653604	FZD2,H2AC8,H2AC7,H2BC5,H2BC3,H3-3B,LRP5,PSMB4,PSMD8,SOX2,TLE4,UBB,H4C9,H2AC14,H2AC6,H2AC4,H2AC20,H2BC13,H2BC15,H2BC14,H2BC9,H2BC17,H2BC21,H3C1,H3C4,H3C3,H3C6,H3C11,H3C8,H3C12,H3C10,H3C2,H4C1,H4C4,H4C6,H4C12,H4C3,H4C8,H4C2,H4C5,H4C13,H3C7,H2BC11,ZNRF3,H2BC12,H4-16,H3C13
1_Member	GO Biological Processes	GO:0031497	chromatin assembly	-31.8245	-29.2337	42/175	3006,3007,3008,3009,3017,3018,3021,3024,8091,8294,8340,8341,8342,8345,8348,8349,8350,8351,8352,8353,8354,8355,8356,8357,8358,8359,8360,8361,8362,8364,8365,8366,8367,8368,8968,8970,57673,85236,121504,201161,440689,653604	H1-2,H1-3,H1-4,H1-5,H2BC5,H2BC3,H3-3B,H1-1,HMGA2,H4C9,H2BC13,H2BC15,H2BC14,H2BC9,H2BC17,H2BC21,H3C1,H3C4,H3C3,H3C6,H3C11,H3C8,H3C12,H3C10,H3C2,H4C1,H4C4,H4C6,H4C12,H4C3,H4C8,H4C2,H4C5,H4C13,H3C7,H2BC11,BEND3,H2BC12,H4-16,CENPV,H2BC18,H3C13
1_Member	Reactome Gene Sets	R-HSA-3247509	Chromatin modifying enzymes	-31.7101	-29.1343	50/274	3012,3013,3017,3018,3276,6604,8242,8294,8329,8330,8331,8332,8334,8335,8336,8338,8340,8341,8342,8345,8348,8349,8350,8351,8352,8353,8354,8355,8356,8357,8358,8359,8360,8361,8362,8364,8365,8366,8367,8368,8968,8969,8970,85235,85236,92815,121504,317772,440689,653604	H2AC8,H2AC7,H2BC5,H2BC3,PRMT1,SMARCD3,KDM5C,H4C9,H2AC13,H2AC15,H2AC14,H2AC16,H2AC6,H2AC4,H2AC17,H2AC20,H2BC13,H2BC15,H2BC14,H2BC9,H2BC17,H2BC21,H3C1,H3C4,H3C3,H3C6,H3C11,H3C8,H3C12,H3C10,H3C2,H4C1,H4C4,H4C6,H4C12,H4C3,H4C8,H4C2,H4C5,H4C13,H3C7,H2AC11,H2BC11,H2AC12,H2BC12,H2AW,H4-16,H2AC21,H2BC18,H3C13
1_Member	Reactome Gene Sets	R-HSA-4839726	Chromatin organization	-31.7101	-29.1343	50/274	3012,3013,3017,3018,3276,6604,8242,8294,8329,8330,8331,8332,8334,8335,8336,8338,8340,8341,8342,8345,8348,8349,8350,8351,8352,8353,8354,8355,8356,8357,8358,8359,8360,8361,8362,8364,8365,8366,8367,8368,8968,8969,8970,85235,85236,92815,121504,317772,440689,653604	H2AC8,H2AC7,H2BC5,H2BC3,PRMT1,SMARCD3,KDM5C,H4C9,H2AC13,H2AC15,H2AC14,H2AC16,H2AC6,H2AC4,H2AC17,H2AC20,H2BC13,H2BC15,H2BC14,H2BC9,H2BC17,H2BC21,H3C1,H3C4,H3C3,H3C6,H3C11,H3C8,H3C12,H3C10,H3C2,H4C1,H4C4,H4C6,H4C12,H4C3,H4C8,H4C2,H4C5,H4C13,H3C7,H2AC11,H2BC11,H2AC12,H2BC12,H2AW,H4-16,H2AC21,H2BC18,H3C13
1_Member	Reactome Gene Sets	R-HSA-69306	DNA Replication	-31.4189	-28.8503	43/190	3012,3013,3017,3018,3021,5692,5714,7314,8294,8331,8334,8335,8338,8340,8341,8342,8345,8348,8349,8350,8351,8352,8353,8354,8355,8356,8357,8358,8359,8360,8361,8362,8364,8365,8366,8367,8368,8968,8970,85236,121504,246184,653604	H2AC8,H2AC7,H2BC5,H2BC3,H3-3B,PSMB4,PSMD8,UBB,H4C9,H2AC14,H2AC6,H2AC4,H2AC20,H2BC13,H2BC15,H2BC14,H2BC9,H2BC17,H2BC21,H3C1,H3C4,H3C3,H3C6,H3C11,H3C8,H3C12,H3C10,H3C2,H4C1,H4C4,H4C6,H4C12,H4C3,H4C8,H4C2,H4C5,H4C13,H3C7,H2BC11,H2BC12,H4-16,CDC26,H3C13
1_Member	Reactome Gene Sets	R-HSA-171306	Packaging Of Telomere Ends	-31.324	-28.7626	27/52	3012,3013,3017,3018,8294,8331,8334,8335,8338,8340,8341,8342,8345,8348,8349,8359,8360,8361,8362,8364,8365,8366,8367,8368,8970,85236,121504	H2AC8,H2AC7,H2BC5,H2BC3,H4C9,H2AC14,H2AC6,H2AC4,H2AC20,H2BC13,H2BC15,H2BC14,H2BC9,H2BC17,H2BC21,H4C1,H4C4,H4C6,H4C12,H4C3,H4C8,H4C2,H4C5,H4C13,H2BC11,H2BC12,H4-16
1_Member	Reactome Gene Sets	R-HSA-212165	Epigenetic regulation of gene expression	-31.1522	-28.5979	39/149	3012,3013,3017,3018,3021,8294,8331,8334,8335,8338,8340,8341,8342,8345,8348,8349,8350,8351,8352,8353,8354,8355,8356,8357,8358,8359,8360,8361,8362,8364,8365,8366,8367,8368,8968,8970,85236,121504,653604	H2AC8,H2AC7,H2BC5,H2BC3,H3-3B,H4C9,H2AC14,H2AC6,H2AC4,H2AC20,H2BC13,H2BC15,H2BC14,H2BC9,H2BC17,H2BC21,H3C1,H3C4,H3C3,H3C6,H3C11,H3C8,H3C12,H3C10,H3C2,H4C1,H4C4,H4C6,H4C12,H4C3,H4C8,H4C2,H4C5,H4C13,H3C7,H2BC11,H2BC12,H4-16,H3C13
1_Member	Reactome Gene Sets	R-HSA-2262752	Cellular responses to stress	-30.5729	-28.0255	77/757	467,648,1021,1029,1912,3006,3007,3008,3009,3012,3013,3017,3018,3021,3024,3576,4217,5692,5714,6170,6171,6175,6193,6218,6224,6228,6230,6235,6604,7314,8091,8294,8331,8334,8335,8338,8340,8341,8342,8345,8348,8349,8350,8351,8352,8353,8354,8355,8356,8357,8358,8359,8360,8361,8362,8364,8365,8366,8367,8368,8535,8968,8970,8994,10525,23466,26523,51241,84733,85236,112398,112399,116228,121504,126374,246184,653…	ATF3,BMI1,CDK6,CDKN2A,PHC2,H1-2,H1-3,H1-4,H1-5,H2AC8,H2AC7,H2BC5,H2BC3,H3-3B,H1-1,CXCL8,MAP3K5,PSMB4,PSMD8,RPL39,RPL41,RPLP0,RPS5,RPS17,RPS20,RPS23,RPS25,RPS29,SMARCD3,UBB,HMGA2,H4C9,H2AC14,H2AC6,H2AC4,H2AC20,H2BC13,H2BC15,H2BC14,H2BC9,H2BC17,H2BC21,H3C1,H3C4,H3C3,H3C6,H3C11,H3C8,H3C12,H3C10,H3C2,H4C1,H4C4,H4C6,H4C12,H4C3,H4C8,H4C2,H4C5,H4C13,CBX4,H3C7,H2BC11,LIMD1,HYOU1,CBX6,AGO1,COX16,CBX2,H2BC…
1_Member	GO Biological Processes	GO:0034728	nucleosome organization	-30.4085	-27.868	41/177	3006,3007,3008,3009,3017,3018,3021,3024,6604,8294,8340,8341,8342,8345,8348,8349,8350,8351,8352,8353,8354,8355,8356,8357,8358,8359,8360,8361,8362,8364,8365,8366,8367,8368,8968,8970,85236,92815,121504,440689,653604	H1-2,H1-3,H1-4,H1-5,H2BC5,H2BC3,H3-3B,H1-1,SMARCD3,H4C9,H2BC13,H2BC15,H2BC14,H2BC9,H2BC17,H2BC21,H3C1,H3C4,H3C3,H3C6,H3C11,H3C8,H3C12,H3C10,H3C2,H4C1,H4C4,H4C6,H4C12,H4C3,H4C8,H4C2,H4C5,H4C13,H3C7,H2BC11,H2BC12,H2AW,H4-16,H2BC18,H3C13
1_Member	Reactome Gene Sets	R-HSA-110330	Recognition and association of DNA glycosylase with site containing an affected purine	-30.1679	-27.6473	27/56	3012,3013,3017,3018,8294,8331,8334,8335,8338,8340,8341,8342,8345,8348,8349,8359,8360,8361,8362,8364,8365,8366,8367,8368,8970,85236,121504	H2AC8,H2AC7,H2BC5,H2BC3,H4C9,H2AC14,H2AC6,H2AC4,H2AC20,H2BC13,H2BC15,H2BC14,H2BC9,H2BC17,H2BC21,H4C1,H4C4,H4C6,H4C12,H4C3,H4C8,H4C2,H4C5,H4C13,H2BC11,H2BC12,H4-16
1_Member	Reactome Gene Sets	R-HSA-110331	Cleavage of the damaged purine	-30.1679	-27.6473	27/56	3012,3013,3017,3018,8294,8331,8334,8335,8338,8340,8341,8342,8345,8348,8349,8359,8360,8361,8362,8364,8365,8366,8367,8368,8970,85236,121504	H2AC8,H2AC7,H2BC5,H2BC3,H4C9,H2AC14,H2AC6,H2AC4,H2AC20,H2BC13,H2BC15,H2BC14,H2BC9,H2BC17,H2BC21,H4C1,H4C4,H4C6,H4C12,H4C3,H4C8,H4C2,H4C5,H4C13,H2BC11,H2BC12,H4-16
1_Member	Reactome Gene Sets	R-HSA-73927	Depurination	-30.1679	-27.6473	27/56	3012,3013,3017,3018,8294,8331,8334,8335,8338,8340,8341,8342,8345,8348,8349,8359,8360,8361,8362,8364,8365,8366,8367,8368,8970,85236,121504	H2AC8,H2AC7,H2BC5,H2BC3,H4C9,H2AC14,H2AC6,H2AC4,H2AC20,H2BC13,H2BC15,H2BC14,H2BC9,H2BC17,H2BC21,H4C1,H4C4,H4C6,H4C12,H4C3,H4C8,H4C2,H4C5,H4C13,H2BC11,H2BC12,H4-16
1_Member	Reactome Gene Sets	R-HSA-9006931	Signaling by Nuclear Receptors	-29.8348	-27.3206	50/299	1839,2069,2354,2790,3012,3013,3017,3018,3021,3276,4602,6720,8294,8331,8334,8335,8338,8340,8341,8342,8345,8348,8349,8350,8351,8352,8353,8354,8355,8356,8357,8358,8359,8360,8361,8362,8364,8365,8366,8367,8368,8503,8968,8970,26523,27161,85236,121504,340665,653604	HBEGF,EREG,FOSB,GNG10,H2AC8,H2AC7,H2BC5,H2BC3,H3-3B,PRMT1,MYB,SREBF1,H4C9,H2AC14,H2AC6,H2AC4,H2AC20,H2BC13,H2BC15,H2BC14,H2BC9,H2BC17,H2BC21,H3C1,H3C4,H3C3,H3C6,H3C11,H3C8,H3C12,H3C10,H3C2,H4C1,H4C4,H4C6,H4C12,H4C3,H4C8,H4C2,H4C5,H4C13,PIK3R3,H3C7,H2BC11,AGO1,AGO2,H2BC12,H4-16,CYP26C1,H3C13
1_Member	Reactome Gene Sets	R-HSA-110328	Recognition and association of DNA glycosylase with site containing an affected pyrimidine	-28.8796	-26.3841	27/61	3012,3013,3017,3018,8294,8331,8334,8335,8338,8340,8341,8342,8345,8348,8349,8359,8360,8361,8362,8364,8365,8366,8367,8368,8970,85236,121504	H2AC8,H2AC7,H2BC5,H2BC3,H4C9,H2AC14,H2AC6,H2AC4,H2AC20,H2BC13,H2BC15,H2BC14,H2BC9,H2BC17,H2BC21,H4C1,H4C4,H4C6,H4C12,H4C3,H4C8,H4C2,H4C5,H4C13,H2BC11,H2BC12,H4-16
1_Member	Reactome Gene Sets	R-HSA-110329	Cleavage of the damaged pyrimidine	-28.8796	-26.3841	27/61	3012,3013,3017,3018,8294,8331,8334,8335,8338,8340,8341,8342,8345,8348,8349,8359,8360,8361,8362,8364,8365,8366,8367,8368,8970,85236,121504	H2AC8,H2AC7,H2BC5,H2BC3,H4C9,H2AC14,H2AC6,H2AC4,H2AC20,H2BC13,H2BC15,H2BC14,H2BC9,H2BC17,H2BC21,H4C1,H4C4,H4C6,H4C12,H4C3,H4C8,H4C2,H4C5,H4C13,H2BC11,H2BC12,H4-16
1_Member	Reactome Gene Sets	R-HSA-73928	Depyrimidination	-28.8796	-26.3841	27/61	3012,3013,3017,3018,8294,8331,8334,8335,8338,8340,8341,8342,8345,8348,8349,8359,8360,8361,8362,8364,8365,8366,8367,8368,8970,85236,121504	H2AC8,H2AC7,H2BC5,H2BC3,H4C9,H2AC14,H2AC6,H2AC4,H2AC20,H2BC13,H2BC15,H2BC14,H2BC9,H2BC17,H2BC21,H4C1,H4C4,H4C6,H4C12,H4C3,H4C8,H4C2,H4C5,H4C13,H2BC11,H2BC12,H4-16
1_Member	Reactome Gene Sets	R-HSA-9670095	Inhibition of DNA recombination at telomere	-28.835	-26.3457	28/68	3012,3013,3017,3018,3021,8294,8331,8334,8335,8338,8340,8341,8342,8345,8348,8349,8359,8360,8361,8362,8364,8365,8366,8367,8368,8970,85236,121504	H2AC8,H2AC7,H2BC5,H2BC3,H3-3B,H4C9,H2AC14,H2AC6,H2AC4,H2AC20,H2BC13,H2BC15,H2BC14,H2BC9,H2BC17,H2BC21,H4C1,H4C4,H4C6,H4C12,H4C3,H4C8,H4C2,H4C5,H4C13,H2BC11,H2BC12,H4-16
1_Member	Reactome Gene Sets	R-HSA-195721	Signaling by WNT	-28.6028	-26.1194	51/332	2535,2790,3012,3013,3017,3018,3021,4041,5692,5714,6657,7091,7314,8294,8331,8334,8335,8338,8340,8341,8342,8345,8348,8349,8350,8351,8352,8353,8354,8355,8356,8357,8358,8359,8360,8361,8362,8364,8365,8366,8367,8368,8968,8970,26523,27161,79971,84133,85236,121504,653604	FZD2,GNG10,H2AC8,H2AC7,H2BC5,H2BC3,H3-3B,LRP5,PSMB4,PSMD8,SOX2,TLE4,UBB,H4C9,H2AC14,H2AC6,H2AC4,H2AC20,H2BC13,H2BC15,H2BC14,H2BC9,H2BC17,H2BC21,H3C1,H3C4,H3C3,H3C6,H3C11,H3C8,H3C12,H3C10,H3C2,H4C1,H4C4,H4C6,H4C12,H4C3,H4C8,H4C2,H4C5,H4C13,H3C7,H2BC11,AGO1,AGO2,WLS,ZNRF3,H2BC12,H4-16,H3C13
1_Member	Reactome Gene Sets	R-HSA-73929	Base-Excision Repair, AP Site Formation	-28.4048	-25.9274	27/63	3012,3013,3017,3018,8294,8331,8334,8335,8338,8340,8341,8342,8345,8348,8349,8359,8360,8361,8362,8364,8365,8366,8367,8368,8970,85236,121504	H2AC8,H2AC7,H2BC5,H2BC3,H4C9,H2AC14,H2AC6,H2AC4,H2AC20,H2BC13,H2BC15,H2BC14,H2BC9,H2BC17,H2BC21,H4C1,H4C4,H4C6,H4C12,H4C3,H4C8,H4C2,H4C5,H4C13,H2BC11,H2BC12,H4-16
1_Member	GO Biological Processes	GO:0065004	protein-DNA complex assembly	-28.2343	-25.7627	40/187	3006,3007,3008,3009,3017,3018,3021,3024,8294,8340,8341,8342,8345,8348,8349,8350,8351,8352,8353,8354,8355,8356,8357,8358,8359,8360,8361,8362,8364,8365,8366,8367,8368,8968,8970,85236,121504,201161,440689,653604	H1-2,H1-3,H1-4,H1-5,H2BC5,H2BC3,H3-3B,H1-1,H4C9,H2BC13,H2BC15,H2BC14,H2BC9,H2BC17,H2BC21,H3C1,H3C4,H3C3,H3C6,H3C11,H3C8,H3C12,H3C10,H3C2,H4C1,H4C4,H4C6,H4C12,H4C3,H4C8,H4C2,H4C5,H4C13,H3C7,H2BC11,H2BC12,H4-16,CENPV,H2BC18,H3C13
1_Member	GO Biological Processes	GO:0006338	chromatin remodeling	-28.0542	-25.5883	46/267	3006,3007,3008,3009,3017,3018,3021,3024,4602,6604,8242,8294,8340,8341,8342,8345,8348,8349,8350,8351,8352,8353,8354,8355,8356,8357,8358,8359,8360,8361,8362,8364,8365,8366,8367,8368,8968,8970,9759,10360,85236,92815,121504,201161,440689,653604	H1-2,H1-3,H1-4,H1-5,H2BC5,H2BC3,H3-3B,H1-1,MYB,SMARCD3,KDM5C,H4C9,H2BC13,H2BC15,H2BC14,H2BC9,H2BC17,H2BC21,H3C1,H3C4,H3C3,H3C6,H3C11,H3C8,H3C12,H3C10,H3C2,H4C1,H4C4,H4C6,H4C12,H4C3,H4C8,H4C2,H4C5,H4C13,H3C7,H2BC11,HDAC4,NPM3,H2BC12,H2AW,H4-16,CENPV,H2BC18,H3C13
1_Member	GO Biological Processes	GO:0006323	DNA packaging	-27.6782	-25.218	42/218	3006,3007,3008,3009,3017,3018,3021,3024,8091,8294,8340,8341,8342,8345,8348,8349,8350,8351,8352,8353,8354,8355,8356,8357,8358,8359,8360,8361,8362,8364,8365,8366,8367,8368,8968,8970,57673,85236,121504,201161,440689,653604	H1-2,H1-3,H1-4,H1-5,H2BC5,H2BC3,H3-3B,H1-1,HMGA2,H4C9,H2BC13,H2BC15,H2BC14,H2BC9,H2BC17,H2BC21,H3C1,H3C4,H3C3,H3C6,H3C11,H3C8,H3C12,H3C10,H3C2,H4C1,H4C4,H4C6,H4C12,H4C3,H4C8,H4C2,H4C5,H4C13,H3C7,H2BC11,BEND3,H2BC12,H4-16,CENPV,H2BC18,H3C13
1_Member	GO Biological Processes	GO:0006335	DNA replication-dependent chromatin assembly	-27.5549	-25.1058	21/32	8294,8350,8351,8352,8353,8354,8355,8356,8357,8358,8359,8360,8361,8362,8364,8365,8366,8367,8368,8968,121504	H4C9,H3C1,H3C4,H3C3,H3C6,H3C11,H3C8,H3C12,H3C10,H3C2,H4C1,H4C4,H4C6,H4C12,H4C3,H4C8,H4C2,H4C5,H4C13,H3C7,H4-16
1_Member	GO Biological Processes	GO:0034723	DNA replication-dependent chromatin organization	-27.5549	-25.1058	21/32	8294,8350,8351,8352,8353,8354,8355,8356,8357,8358,8359,8360,8361,8362,8364,8365,8366,8367,8368,8968,121504	H4C9,H3C1,H3C4,H3C3,H3C6,H3C11,H3C8,H3C12,H3C10,H3C2,H4C1,H4C4,H4C6,H4C12,H4C3,H4C8,H4C2,H4C5,H4C13,H3C7,H4-16
1_Member	Reactome Gene Sets	R-HSA-606279	Deposition of new CENPA-containing nucleosomes at the centromere	-26.1162	-23.678	27/74	3012,3013,3017,3018,8294,8331,8334,8335,8338,8340,8341,8342,8345,8348,8349,8359,8360,8361,8362,8364,8365,8366,8367,8368,8970,85236,121504	H2AC8,H2AC7,H2BC5,H2BC3,H4C9,H2AC14,H2AC6,H2AC4,H2AC20,H2BC13,H2BC15,H2BC14,H2BC9,H2BC17,H2BC21,H4C1,H4C4,H4C6,H4C12,H4C3,H4C8,H4C2,H4C5,H4C13,H2BC11,H2BC12,H4-16
1_Member	Reactome Gene Sets	R-HSA-774815	Nucleosome assembly	-26.1162	-23.678	27/74	3012,3013,3017,3018,8294,8331,8334,8335,8338,8340,8341,8342,8345,8348,8349,8359,8360,8361,8362,8364,8365,8366,8367,8368,8970,85236,121504	H2AC8,H2AC7,H2BC5,H2BC3,H4C9,H2AC14,H2AC6,H2AC4,H2AC20,H2BC13,H2BC15,H2BC14,H2BC9,H2BC17,H2BC21,H4C1,H4C4,H4C6,H4C12,H4C3,H4C8,H4C2,H4C5,H4C13,H2BC11,H2BC12,H4-16
1_Member	GO Biological Processes	GO:0071824	protein-DNA complex subunit organization	-25.9267	-23.4939	42/240	3006,3007,3008,3009,3017,3018,3021,3024,6604,8294,8340,8341,8342,8345,8348,8349,8350,8351,8352,8353,8354,8355,8356,8357,8358,8359,8360,8361,8362,8364,8365,8366,8367,8368,8968,8970,85236,92815,121504,201161,440689,653604	H1-2,H1-3,H1-4,H1-5,H2BC5,H2BC3,H3-3B,H1-1,SMARCD3,H4C9,H2BC13,H2BC15,H2BC14,H2BC9,H2BC17,H2BC21,H3C1,H3C4,H3C3,H3C6,H3C11,H3C8,H3C12,H3C10,H3C2,H4C1,H4C4,H4C6,H4C12,H4C3,H4C8,H4C2,H4C5,H4C13,H3C7,H2BC11,H2BC12,H2AW,H4-16,CENPV,H2BC18,H3C13
1_Member	Reactome Gene Sets	R-HSA-1221632	Meiotic synapsis	-25.2197	-22.7921	27/79	3012,3013,3017,3018,8294,8331,8334,8335,8338,8340,8341,8342,8345,8348,8349,8359,8360,8361,8362,8364,8365,8366,8367,8368,8970,85236,121504	H2AC8,H2AC7,H2BC5,H2BC3,H4C9,H2AC14,H2AC6,H2AC4,H2AC20,H2BC13,H2BC15,H2BC14,H2BC9,H2BC17,H2BC21,H4C1,H4C4,H4C6,H4C12,H4C3,H4C8,H4C2,H4C5,H4C13,H2BC11,H2BC12,H4-16
1_Member	Reactome Gene Sets	R-HSA-3214842	HDMs demethylate histones	-25.1693	-22.7469	23/50	8242,8294,8350,8351,8352,8353,8354,8355,8356,8357,8358,8359,8360,8361,8362,8364,8365,8366,8367,8368,8968,121504,653604	KDM5C,H4C9,H3C1,H3C4,H3C3,H3C6,H3C11,H3C8,H3C12,H3C10,H3C2,H4C1,H4C4,H4C6,H4C12,H4C3,H4C8,H4C2,H4C5,H4C13,H3C7,H4-16,H3C13
1_Member	Reactome Gene Sets	R-HSA-73884	Base Excision Repair	-23.1945	-20.7772	27/92	3012,3013,3017,3018,8294,8331,8334,8335,8338,8340,8341,8342,8345,8348,8349,8359,8360,8361,8362,8364,8365,8366,8367,8368,8970,85236,121504	H2AC8,H2AC7,H2BC5,H2BC3,H4C9,H2AC14,H2AC6,H2AC4,H2AC20,H2BC13,H2BC15,H2BC14,H2BC9,H2BC17,H2BC21,H4C1,H4C4,H4C6,H4C12,H4C3,H4C8,H4C2,H4C5,H4C13,H2BC11,H2BC12,H4-16
1_Member	GO Biological Processes	GO:0071103	DNA conformation change	-22.1314	-19.7192	43/314	3006,3007,3008,3009,3017,3018,3021,3024,3087,8091,8294,8340,8341,8342,8345,8348,8349,8350,8351,8352,8353,8354,8355,8356,8357,8358,8359,8360,8361,8362,8364,8365,8366,8367,8368,8968,8970,57673,85236,121504,201161,440689,653604	H1-2,H1-3,H1-4,H1-5,H2BC5,H2BC3,H3-3B,H1-1,HHEX,HMGA2,H4C9,H2BC13,H2BC15,H2BC14,H2BC9,H2BC17,H2BC21,H3C1,H3C4,H3C3,H3C6,H3C11,H3C8,H3C12,H3C10,H3C2,H4C1,H4C4,H4C6,H4C12,H4C3,H4C8,H4C2,H4C5,H4C13,H3C7,H2BC11,BEND3,H2BC12,H4-16,CENPV,H2BC18,H3C13
1_Member	Reactome Gene Sets	R-HSA-157579	Telomere Maintenance	-21.7936	-19.3864	28/113	3012,3013,3017,3018,3021,8294,8331,8334,8335,8338,8340,8341,8342,8345,8348,8349,8359,8360,8361,8362,8364,8365,8366,8367,8368,8970,85236,121504	H2AC8,H2AC7,H2BC5,H2BC3,H3-3B,H4C9,H2AC14,H2AC6,H2AC4,H2AC20,H2BC13,H2BC15,H2BC14,H2BC9,H2BC17,H2BC21,H4C1,H4C4,H4C6,H4C12,H4C3,H4C8,H4C2,H4C5,H4C13,H2BC11,H2BC12,H4-16
1_Member	GO Biological Processes	GO:0006325	chromatin organization	-21.5132	-19.111	56/569	648,3006,3007,3008,3009,3017,3018,3021,3024,4602,6604,6657,8091,8242,8294,8340,8341,8342,8345,8348,8349,8350,8351,8352,8353,8354,8355,8356,8357,8358,8359,8360,8361,8362,8364,8365,8366,8367,8368,8535,8968,8970,9759,10336,10360,23466,57673,64783,84733,85236,85460,92815,121504,201161,440689,653604	BMI1,H1-2,H1-3,H1-4,H1-5,H2BC5,H2BC3,H3-3B,H1-1,MYB,SMARCD3,SOX2,HMGA2,KDM5C,H4C9,H2BC13,H2BC15,H2BC14,H2BC9,H2BC17,H2BC21,H3C1,H3C4,H3C3,H3C6,H3C11,H3C8,H3C12,H3C10,H3C2,H4C1,H4C4,H4C6,H4C12,H4C3,H4C8,H4C2,H4C5,H4C13,CBX4,H3C7,H2BC11,HDAC4,PCGF3,NPM3,CBX6,BEND3,RBM15,CBX2,H2BC12,ZNF518B,H2AW,H4-16,CENPV,H2BC18,H3C13
1_Member	WikiPathways	WP2369	Histone modifications	-21.1161	-18.7188	23/70	3021,8294,8350,8351,8352,8353,8354,8355,8356,8357,8358,8359,8360,8361,8362,8364,8365,8366,8367,8368,8968,121504,653604	H3-3B,H4C9,H3C1,H3C4,H3C3,H3C6,H3C11,H3C8,H3C12,H3C10,H3C2,H4C1,H4C4,H4C6,H4C12,H4C3,H4C8,H4C2,H4C5,H4C13,H3C7,H4-16,H3C13
1_Member	Reactome Gene Sets	R-HSA-195258	RHO GTPase Effectors	-20.5419	-18.1495	42/327	388,1742,3012,3013,3017,3018,3021,8294,8331,8334,8335,8338,8340,8341,8342,8345,8348,8349,8350,8351,8352,8353,8354,8355,8356,8357,8358,8359,8360,8361,8362,8364,8365,8366,8367,8368,8968,8970,10788,85236,121504,653604	RHOB,DLG4,H2AC8,H2AC7,H2BC5,H2BC3,H3-3B,H4C9,H2AC14,H2AC6,H2AC4,H2AC20,H2BC13,H2BC15,H2BC14,H2BC9,H2BC17,H2BC21,H3C1,H3C4,H3C3,H3C6,H3C11,H3C8,H3C12,H3C10,H3C2,H4C1,H4C4,H4C6,H4C12,H4C3,H4C8,H4C2,H4C5,H4C13,H3C7,H2BC11,IQGAP2,H2BC12,H4-16,H3C13
1_Member	Reactome Gene Sets	R-HSA-3214841	PKMTs methylate histone lysines	-19.5887	-17.201	22/71	8294,8350,8351,8352,8353,8354,8355,8356,8357,8358,8359,8360,8361,8362,8364,8365,8366,8367,8368,8968,121504,653604	H4C9,H3C1,H3C4,H3C3,H3C6,H3C11,H3C8,H3C12,H3C10,H3C2,H4C1,H4C4,H4C6,H4C12,H4C3,H4C8,H4C2,H4C5,H4C13,H3C7,H4-16,H3C13
1_Member	Reactome Gene Sets	R-HSA-73886	Chromosome Maintenance	-18.9956	-16.6127	28/141	3012,3013,3017,3018,3021,8294,8331,8334,8335,8338,8340,8341,8342,8345,8348,8349,8359,8360,8361,8362,8364,8365,8366,8367,8368,8970,85236,121504	H2AC8,H2AC7,H2BC5,H2BC3,H3-3B,H4C9,H2AC14,H2AC6,H2AC4,H2AC20,H2BC13,H2BC15,H2BC14,H2BC9,H2BC17,H2BC21,H4C1,H4C4,H4C6,H4C12,H4C3,H4C8,H4C2,H4C5,H4C13,H2BC11,H2BC12,H4-16
1_Member	Reactome Gene Sets	R-HSA-5693565	Recruitment and ATM-mediated phosphorylation of repair and signaling proteins at DNA double strand breaks	-18.7259	-16.3477	22/77	3017,3018,7314,8294,8340,8341,8342,8345,8348,8349,8359,8360,8361,8362,8364,8365,8366,8367,8368,8970,85236,121504	H2BC5,H2BC3,UBB,H4C9,H2BC13,H2BC15,H2BC14,H2BC9,H2BC17,H2BC21,H4C1,H4C4,H4C6,H4C12,H4C3,H4C8,H4C2,H4C5,H4C13,H2BC11,H2BC12,H4-16
1_Member	Reactome Gene Sets	R-HSA-5693606	DNA Double Strand Break Response	-18.5903	-16.2167	22/78	3017,3018,7314,8294,8340,8341,8342,8345,8348,8349,8359,8360,8361,8362,8364,8365,8366,8367,8368,8970,85236,121504	H2BC5,H2BC3,UBB,H4C9,H2BC13,H2BC15,H2BC14,H2BC9,H2BC17,H2BC21,H4C1,H4C4,H4C6,H4C12,H4C3,H4C8,H4C2,H4C5,H4C13,H2BC11,H2BC12,H4-16
1_Member	Reactome Gene Sets	R-HSA-5693571	Nonhomologous End-Joining (NHEJ)	-18.5422	-16.1732	21/69	3017,3018,8294,8340,8341,8342,8345,8348,8349,8359,8360,8361,8362,8364,8365,8366,8367,8368,8970,85236,121504	H2BC5,H2BC3,H4C9,H2BC13,H2BC15,H2BC14,H2BC9,H2BC17,H2BC21,H4C1,H4C4,H4C6,H4C12,H4C3,H4C8,H4C2,H4C5,H4C13,H2BC11,H2BC12,H4-16
1_Member	KEGG Pathway	hsa05203	Viral carcinogenesis	-17.4211	-15.0567	31/204	894,1021,1029,3017,3018,3665,3718,5366,8294,8340,8341,8342,8345,8348,8349,8359,8360,8361,8362,8364,8365,8366,8367,8368,8503,8970,9759,27044,85236,121504,440689	CCND2,CDK6,CDKN2A,H2BC5,H2BC3,IRF7,JAK3,PMAIP1,H4C9,H2BC13,H2BC15,H2BC14,H2BC9,H2BC17,H2BC21,H4C1,H4C4,H4C6,H4C12,H4C3,H4C8,H4C2,H4C5,H4C13,PIK3R3,H2BC11,HDAC4,SND1,H2BC12,H4-16,H2BC18
1_Member	Reactome Gene Sets	R-HSA-68886	M Phase	-17.3106	-14.9507	43/418	3012,3013,3017,3018,3021,5692,5714,7314,8294,8331,8334,8335,8338,8340,8341,8342,8345,8348,8349,8350,8351,8352,8353,8354,8355,8356,8357,8358,8359,8360,8361,8362,8364,8365,8366,8367,8368,8968,8970,85236,121504,246184,653604	H2AC8,H2AC7,H2BC5,H2BC3,H3-3B,PSMB4,PSMD8,UBB,H4C9,H2AC14,H2AC6,H2AC4,H2AC20,H2BC13,H2BC15,H2BC14,H2BC9,H2BC17,H2BC21,H3C1,H3C4,H3C3,H3C6,H3C11,H3C8,H3C12,H3C10,H3C2,H4C1,H4C4,H4C6,H4C12,H4C3,H4C8,H4C2,H4C5,H4C13,H3C7,H2BC11,H2BC12,H4-16,CDC26,H3C13
1_Member	Reactome Gene Sets	R-HSA-5693607	Processing of DNA double-strand break ends	-16.2599	-13.9044	22/98	3017,3018,7314,8294,8340,8341,8342,8345,8348,8349,8359,8360,8361,8362,8364,8365,8366,8367,8368,8970,85236,121504	H2BC5,H2BC3,UBB,H4C9,H2BC13,H2BC15,H2BC14,H2BC9,H2BC17,H2BC21,H4C1,H4C4,H4C6,H4C12,H4C3,H4C8,H4C2,H4C5,H4C13,H2BC11,H2BC12,H4-16
1_Member	GO Biological Processes	GO:0032200	telomere organization	-16.2376	-13.8866	23/110	3021,7012,8294,8350,8351,8352,8353,8354,8355,8356,8357,8358,8359,8360,8361,8362,8364,8365,8366,8367,8368,8968,121504	H3-3B,TERC,H4C9,H3C1,H3C4,H3C3,H3C6,H3C11,H3C8,H3C12,H3C10,H3C2,H4C1,H4C4,H4C6,H4C12,H4C3,H4C8,H4C2,H4C5,H4C13,H3C7,H4-16
1_Member	GO Biological Processes	GO:0045653	negative regulation of megakaryocyte differentiation	-16.0707	-13.724	12/18	3276,8294,8359,8360,8361,8362,8364,8365,8366,8367,8368,121504	PRMT1,H4C9,H4C1,H4C4,H4C6,H4C12,H4C3,H4C8,H4C2,H4C5,H4C13,H4-16
1_Member	Reactome Gene Sets	R-HSA-194315	Signaling by Rho GTPases	-15.8372	-13.4948	54/707	388,393,708,1742,1969,2802,3012,3013,3017,3018,3021,5924,8294,8331,8334,8335,8338,8340,8341,8342,8345,8348,8349,8350,8351,8352,8353,8354,8355,8356,8357,8358,8359,8360,8361,8362,8364,8365,8366,8367,8368,8503,8968,8970,10788,23370,23616,55200,55619,84144,85236,121504,148170,653604	RHOB,ARHGAP4,C1QBP,DLG4,EPHA2,GOLGA3,H2AC8,H2AC7,H2BC5,H2BC3,H3-3B,RASGRF2,H4C9,H2AC14,H2AC6,H2AC4,H2AC20,H2BC13,H2BC15,H2BC14,H2BC9,H2BC17,H2BC21,H3C1,H3C4,H3C3,H3C6,H3C11,H3C8,H3C12,H3C10,H3C2,H4C1,H4C4,H4C6,H4C12,H4C3,H4C8,H4C2,H4C5,H4C13,PIK3R3,H3C7,H2BC11,IQGAP2,ARHGEF18,SH3BP1,PLEKHG6,DOCK10,SYDE2,H2BC12,H4-16,CDC42EP5,H3C13
1_Member	Reactome Gene Sets	R-HSA-9716542	Signaling by Rho GTPases, Miro GTPases and RHOBTB3	-15.4235	-13.0896	54/723	388,393,708,1742,1969,2802,3012,3013,3017,3018,3021,5924,8294,8331,8334,8335,8338,8340,8341,8342,8345,8348,8349,8350,8351,8352,8353,8354,8355,8356,8357,8358,8359,8360,8361,8362,8364,8365,8366,8367,8368,8503,8968,8970,10788,23370,23616,55200,55619,84144,85236,121504,148170,653604	RHOB,ARHGAP4,C1QBP,DLG4,EPHA2,GOLGA3,H2AC8,H2AC7,H2BC5,H2BC3,H3-3B,RASGRF2,H4C9,H2AC14,H2AC6,H2AC4,H2AC20,H2BC13,H2BC15,H2BC14,H2BC9,H2BC17,H2BC21,H3C1,H3C4,H3C3,H3C6,H3C11,H3C8,H3C12,H3C10,H3C2,H4C1,H4C4,H4C6,H4C12,H4C3,H4C8,H4C2,H4C5,H4C13,PIK3R3,H3C7,H2BC11,IQGAP2,ARHGEF18,SH3BP1,PLEKHG6,DOCK10,SYDE2,H2BC12,H4-16,CDC42EP5,H3C13
1_Member	Reactome Gene Sets	R-HSA-69473	G2/M DNA damage checkpoint	-15.4031	-13.0735	21/95	3017,3018,8294,8340,8341,8342,8345,8348,8349,8359,8360,8361,8362,8364,8365,8366,8367,8368,8970,85236,121504	H2BC5,H2BC3,H4C9,H2BC13,H2BC15,H2BC14,H2BC9,H2BC17,H2BC21,H4C1,H4C4,H4C6,H4C12,H4C3,H4C8,H4C2,H4C5,H4C13,H2BC11,H2BC12,H4-16
1_Member	Reactome Gene Sets	R-HSA-69278	Cell Cycle, Mitotic	-14.7104	-12.3849	46/560	894,1021,1029,3012,3013,3017,3018,3021,5692,5714,7314,8294,8331,8334,8335,8338,8340,8341,8342,8345,8348,8349,8350,8351,8352,8353,8354,8355,8356,8357,8358,8359,8360,8361,8362,8364,8365,8366,8367,8368,8968,8970,85236,121504,246184,653604	CCND2,CDK6,CDKN2A,H2AC8,H2AC7,H2BC5,H2BC3,H3-3B,PSMB4,PSMD8,UBB,H4C9,H2AC14,H2AC6,H2AC4,H2AC20,H2BC13,H2BC15,H2BC14,H2BC9,H2BC17,H2BC21,H3C1,H3C4,H3C3,H3C6,H3C11,H3C8,H3C12,H3C10,H3C2,H4C1,H4C4,H4C6,H4C12,H4C3,H4C8,H4C2,H4C5,H4C13,H3C7,H2BC11,H2BC12,H4-16,CDC26,H3C13
1_Member	GO Biological Processes	GO:0045652	regulation of megakaryocyte differentiation	-14.2833	-11.966	14/36	3276,3692,8294,8359,8360,8361,8362,8364,8365,8366,8367,8368,64783,121504	PRMT1,EIF6,H4C9,H4C1,H4C4,H4C6,H4C12,H4C3,H4C8,H4C2,H4C5,H4C13,RBM15,H4-16
1_Member	Reactome Gene Sets	R-HSA-5693567	HDR through Homologous Recombination (HRR) or Single Strand Annealing (SSA)	-13.3939	-11.0847	22/132	3017,3018,7314,8294,8340,8341,8342,8345,8348,8349,8359,8360,8361,8362,8364,8365,8366,8367,8368,8970,85236,121504	H2BC5,H2BC3,UBB,H4C9,H2BC13,H2BC15,H2BC14,H2BC9,H2BC17,H2BC21,H4C1,H4C4,H4C6,H4C12,H4C3,H4C8,H4C2,H4C5,H4C13,H2BC11,H2BC12,H4-16
1_Member	Reactome Gene Sets	R-HSA-69481	G2/M Checkpoints	-13.0731	-10.7678	24/167	3017,3018,5692,5714,7314,8294,8340,8341,8342,8345,8348,8349,8359,8360,8361,8362,8364,8365,8366,8367,8368,8970,85236,121504	H2BC5,H2BC3,PSMB4,PSMD8,UBB,H4C9,H2BC13,H2BC15,H2BC14,H2BC9,H2BC17,H2BC21,H4C1,H4C4,H4C6,H4C12,H4C3,H4C8,H4C2,H4C5,H4C13,H2BC11,H2BC12,H4-16
1_Member	Reactome Gene Sets	R-HSA-5693538	Homology Directed Repair	-12.982	-10.6807	22/138	3017,3018,7314,8294,8340,8341,8342,8345,8348,8349,8359,8360,8361,8362,8364,8365,8366,8367,8368,8970,85236,121504	H2BC5,H2BC3,UBB,H4C9,H2BC13,H2BC15,H2BC14,H2BC9,H2BC17,H2BC21,H4C1,H4C4,H4C6,H4C12,H4C3,H4C8,H4C2,H4C5,H4C13,H2BC11,H2BC12,H4-16
1_Member	Reactome Gene Sets	R-HSA-4551638	SUMOylation of chromatin organization proteins	-12.025	-9.73138	16/71	648,1912,8294,8359,8360,8361,8362,8364,8365,8366,8367,8368,8535,9759,84733,121504	BMI1,PHC2,H4C9,H4C1,H4C4,H4C6,H4C12,H4C3,H4C8,H4C2,H4C5,H4C13,CBX4,HDAC4,CBX2,H4-16
1_Member	GO Biological Processes	GO:0006336	DNA replication-independent chromatin assembly	-11.9116	-9.62182	12/33	3021,8294,8359,8360,8361,8362,8364,8365,8366,8367,8368,121504	H3-3B,H4C9,H4C1,H4C4,H4C6,H4C12,H4C3,H4C8,H4C2,H4C5,H4C13,H4-16
1_Member	GO Biological Processes	GO:0034724	DNA replication-independent chromatin organization	-11.7307	-9.4447	12/34	3021,8294,8359,8360,8361,8362,8364,8365,8366,8367,8368,121504	H3-3B,H4C9,H4C1,H4C4,H4C6,H4C12,H4C3,H4C8,H4C2,H4C5,H4C13,H4-16
1_Member	Reactome Gene Sets	R-HSA-1640170	Cell Cycle	-11.4358	-9.1573	46/691	894,1021,1029,3012,3013,3017,3018,3021,5692,5714,7314,8294,8331,8334,8335,8338,8340,8341,8342,8345,8348,8349,8350,8351,8352,8353,8354,8355,8356,8357,8358,8359,8360,8361,8362,8364,8365,8366,8367,8368,8968,8970,85236,121504,246184,653604	CCND2,CDK6,CDKN2A,H2AC8,H2AC7,H2BC5,H2BC3,H3-3B,PSMB4,PSMD8,UBB,H4C9,H2AC14,H2AC6,H2AC4,H2AC20,H2BC13,H2BC15,H2BC14,H2BC9,H2BC17,H2BC21,H3C1,H3C4,H3C3,H3C6,H3C11,H3C8,H3C12,H3C10,H3C2,H4C1,H4C4,H4C6,H4C12,H4C3,H4C8,H4C2,H4C5,H4C13,H3C7,H2BC11,H2BC12,H4-16,CDC26,H3C13
1_Member	GO Biological Processes	GO:0045638	negative regulation of myeloid cell differentiation	-11.3262	-9.05137	17/91	1021,3276,8294,8359,8360,8361,8362,8364,8365,8366,8367,8368,10234,64783,84959,121504,140685	CDK6,PRMT1,H4C9,H4C1,H4C4,H4C6,H4C12,H4C3,H4C8,H4C2,H4C5,H4C13,LRRC17,RBM15,UBASH3B,H4-16,ZBTB46
1_Member	Reactome Gene Sets	R-HSA-5693532	DNA Double-Strand Break Repair	-11.261	-8.98986	22/167	3017,3018,7314,8294,8340,8341,8342,8345,8348,8349,8359,8360,8361,8362,8364,8365,8366,8367,8368,8970,85236,121504	H2BC5,H2BC3,UBB,H4C9,H2BC13,H2BC15,H2BC14,H2BC9,H2BC17,H2BC21,H4C1,H4C4,H4C6,H4C12,H4C3,H4C8,H4C2,H4C5,H4C13,H2BC11,H2BC12,H4-16
1_Member	Reactome Gene Sets	R-HSA-73894	DNA Repair	-10.0167	-7.7634	29/335	3012,3013,3017,3018,7314,8294,8331,8334,8335,8338,8340,8341,8342,8345,8348,8349,8359,8360,8361,8362,8364,8365,8366,8367,8368,8970,9636,85236,121504	H2AC8,H2AC7,H2BC5,H2BC3,UBB,H4C9,H2AC14,H2AC6,H2AC4,H2AC20,H2BC13,H2BC15,H2BC14,H2BC9,H2BC17,H2BC21,H4C1,H4C4,H4C6,H4C12,H4C3,H4C8,H4C2,H4C5,H4C13,H2BC11,ISG15,H2BC12,H4-16
1_Member	GO Biological Processes	GO:0045596	negative regulation of cell differentiation	-9.38471	-7.13493	42/685	393,652,1021,1630,2069,2301,2539,3276,3718,3949,4041,4133,4192,4488,4602,5997,6608,6657,6664,8294,8359,8360,8361,8362,8364,8365,8366,8367,8368,8994,9759,10011,10234,11173,25819,53335,54910,58516,64783,84959,121504,140685	ARHGAP4,BMP4,CDK6,DCC,EREG,FOXE3,G6PD,PRMT1,JAK3,LDLR,LRP5,MAP2,MDK,MSX2,MYB,RGS2,SMO,SOX2,SOX11,H4C9,H4C1,H4C4,H4C6,H4C12,H4C3,H4C8,H4C2,H4C5,H4C13,LIMD1,HDAC4,SRA1,LRRC17,ADAMTS7,NOCT,BCL11A,SEMA4C,SINHCAF,RBM15,UBASH3B,H4-16,ZBTB46
1_Member	GO Biological Processes	GO:0045637	regulation of myeloid cell differentiation	-9.37551	-7.12919	22/208	1021,3276,3665,3692,3976,8294,8359,8360,8361,8362,8364,8365,8366,8367,8368,9636,10234,27086,64783,84959,121504,140685	CDK6,PRMT1,IRF7,EIF6,LIF,H4C9,H4C1,H4C4,H4C6,H4C12,H4C3,H4C8,H4C2,H4C5,H4C13,ISG15,LRRC17,FOXP1,RBM15,UBASH3B,H4-16,ZBTB46
1_Member	Reactome Gene Sets	R-HSA-69620	Cell Cycle Checkpoints	-9.27579	-7.03291	26/293	1029,3017,3018,5692,5714,7314,8294,8340,8341,8342,8345,8348,8349,8359,8360,8361,8362,8364,8365,8366,8367,8368,8970,85236,121504,246184	CDKN2A,H2BC5,H2BC3,PSMB4,PSMD8,UBB,H4C9,H2BC13,H2BC15,H2BC14,H2BC9,H2BC17,H2BC21,H4C1,H4C4,H4C6,H4C12,H4C3,H4C8,H4C2,H4C5,H4C13,H2BC11,H2BC12,H4-16,CDC26
1_Member	WikiPathways	WP5114	Nucleotide excision repair in xeroderma pigmentosum	-8.31705	-6.07758	13/76	3021,8294,8334,8359,8360,8361,8362,8364,8365,8366,8367,8368,121504	H3-3B,H4C9,H2AC6,H4C1,H4C4,H4C6,H4C12,H4C3,H4C8,H4C2,H4C5,H4C13,H4-16
1_Member	Reactome Gene Sets	R-HSA-3108232	SUMO E3 ligases SUMOylate target proteins	-8.09042	-5.85433	19/182	648,1029,1912,3090,8294,8359,8360,8361,8362,8364,8365,8366,8367,8368,8535,9759,28996,84733,121504	BMI1,CDKN2A,PHC2,HIC1,H4C9,H4C1,H4C4,H4C6,H4C12,H4C3,H4C8,H4C2,H4C5,H4C13,CBX4,HDAC4,HIPK2,CBX2,H4-16
1_Member	Reactome Gene Sets	R-HSA-2990846	SUMOylation	-7.85844	-5.6257	19/188	648,1029,1912,3090,8294,8359,8360,8361,8362,8364,8365,8366,8367,8368,8535,9759,28996,84733,121504	BMI1,CDKN2A,PHC2,HIC1,H4C9,H4C1,H4C4,H4C6,H4C12,H4C3,H4C8,H4C2,H4C5,H4C13,CBX4,HDAC4,HIPK2,CBX2,H4-16
1_Member	GO Biological Processes	GO:1903706	regulation of hemopoiesis	-7.74352	-5.51411	27/371	652,1021,3276,3665,3692,3718,3976,4192,4602,8294,8359,8360,8361,8362,8364,8365,8366,8367,8368,9636,10125,10234,27086,64783,84959,121504,140685	BMP4,CDK6,PRMT1,IRF7,EIF6,JAK3,LIF,MDK,MYB,H4C9,H4C1,H4C4,H4C6,H4C12,H4C3,H4C8,H4C2,H4C5,H4C13,ISG15,RASGRP1,LRRC17,FOXP1,RBM15,UBASH3B,H4-16,ZBTB46
1_Member	GO Biological Processes	GO:0006352	DNA-templated transcription, initiation	-6.22752	-4.02696	12/95	8294,8359,8360,8361,8362,8364,8365,8366,8367,8368,57106,121504	H4C9,H4C1,H4C4,H4C6,H4C12,H4C3,H4C8,H4C2,H4C5,H4C13,NAT14,H4-16
1_Member	GO Biological Processes	GO:0097659	nucleic acid-templated transcription	-6.21823	-4.02076	25/388	661,1284,2069,2301,2354,6023,6720,7004,8294,8359,8360,8361,8362,8364,8365,8366,8367,8368,10360,25819,55718,57106,84275,90632,121504	POLR3D,COL4A2,EREG,FOXE3,FOSB,RMRP,SREBF1,TEAD4,H4C9,H4C1,H4C4,H4C6,H4C12,H4C3,H4C8,H4C2,H4C5,H4C13,NPM3,NOCT,POLR3E,NAT14,SLC25A33,LINC00473,H4-16
1_Member	GO Biological Processes	GO:0032774	RNA biosynthetic process	-5.99637	-3.80502	25/399	661,1284,2069,2301,2354,6023,6720,7004,8294,8359,8360,8361,8362,8364,8365,8366,8367,8368,10360,25819,55718,57106,84275,90632,121504	POLR3D,COL4A2,EREG,FOXE3,FOSB,RMRP,SREBF1,TEAD4,H4C9,H4C1,H4C4,H4C6,H4C12,H4C3,H4C8,H4C2,H4C5,H4C13,NPM3,NOCT,POLR3E,NAT14,SLC25A33,LINC00473,H4-16
1_Member	GO Biological Processes	GO:0006351	transcription, DNA-templated	-5.72316	-3.55257	24/386	661,1284,2069,2301,2354,6720,7004,8294,8359,8360,8361,8362,8364,8365,8366,8367,8368,10360,25819,55718,57106,84275,90632,121504	POLR3D,COL4A2,EREG,FOXE3,FOSB,SREBF1,TEAD4,H4C9,H4C1,H4C4,H4C6,H4C12,H4C3,H4C8,H4C2,H4C5,H4C13,NPM3,NOCT,POLR3E,NAT14,SLC25A33,LINC00473,H4-16
1_Member	GO Biological Processes	GO:0018130	heterocycle biosynthetic process	-4.30383	-2.22665	34/790	271,661,1284,2069,2301,2354,4831,5831,6023,6720,7004,7012,7378,8294,8359,8360,8361,8362,8364,8365,8366,8367,8368,8566,10327,10360,25819,29920,55718,57106,79877,84275,90632,121504	AMPD2,POLR3D,COL4A2,EREG,FOXE3,FOSB,NME2,PYCR1,RMRP,SREBF1,TEAD4,TERC,UPP1,H4C9,H4C1,H4C4,H4C6,H4C12,H4C3,H4C8,H4C2,H4C5,H4C13,PDXK,AKR1A1,NPM3,NOCT,PYCR2,POLR3E,NAT14,DCAKD,SLC25A33,LINC00473,H4-16
1_Member	GO Biological Processes	GO:0034654	nucleobase-containing compound biosynthetic process	-3.64611	-1.66115	30/718	271,661,1284,2069,2301,2354,4831,6023,6720,7004,7012,7378,8294,8359,8360,8361,8362,8364,8365,8366,8367,8368,10360,25819,55718,57106,79877,84275,90632,121504	AMPD2,POLR3D,COL4A2,EREG,FOXE3,FOSB,NME2,RMRP,SREBF1,TEAD4,TERC,UPP1,H4C9,H4C1,H4C4,H4C6,H4C12,H4C3,H4C8,H4C2,H4C5,H4C13,NPM3,NOCT,POLR3E,NAT14,DCAKD,SLC25A33,LINC00473,H4-16
1_Member	GO Biological Processes	GO:0019438	aromatic compound biosynthetic process	-3.20432	-1.289	31/799	271,661,1284,2069,2301,2354,4831,6023,6720,7004,7012,7378,8294,8359,8360,8361,8362,8364,8365,8366,8367,8368,8566,10360,25819,55718,57106,79877,84275,90632,121504	AMPD2,POLR3D,COL4A2,EREG,FOXE3,FOSB,NME2,RMRP,SREBF1,TEAD4,TERC,UPP1,H4C9,H4C1,H4C4,H4C6,H4C12,H4C3,H4C8,H4C2,H4C5,H4C13,PDXK,NPM3,NOCT,POLR3E,NAT14,DCAKD,SLC25A33,LINC00473,H4-16
2_Summary	Reactome Gene Sets	R-HSA-5689901	Metalloprotease DUBs	-15.5885	-13.2504	15/37	3012,3013,7314,8329,8330,8331,8332,8334,8335,8336,8338,8969,85235,92815,317772,3017,3018,5692,5714,8340,8341,8342,8345,8348,8349,8970,85236,440689,221937,3718	H2AC8,H2AC7,UBB,H2AC13,H2AC15,H2AC14,H2AC16,H2AC6,H2AC4,H2AC17,H2AC20,H2AC11,H2AC12,H2AW,H2AC21,H2BC5,H2BC3,PSMB4,PSMD8,H2BC13,H2BC15,H2BC14,H2BC9,H2BC17,H2BC21,H2BC11,H2BC12,H2BC18,FOXK1,JAK3
2_Member	Reactome Gene Sets	R-HSA-5689901	Metalloprotease DUBs	-15.5885	-13.2504	15/37	3012,3013,7314,8329,8330,8331,8332,8334,8335,8336,8338,8969,85235,92815,317772	H2AC8,H2AC7,UBB,H2AC13,H2AC15,H2AC14,H2AC16,H2AC6,H2AC4,H2AC17,H2AC20,H2AC11,H2AC12,H2AW,H2AC21
2_Member	Reactome Gene Sets	R-HSA-5689880	Ub-specific processing proteases	-13.7747	-11.4614	28/220	3012,3013,3017,3018,5692,5714,7314,8329,8330,8331,8332,8334,8335,8336,8338,8340,8341,8342,8345,8348,8349,8969,8970,85235,85236,92815,317772,440689	H2AC8,H2AC7,H2BC5,H2BC3,PSMB4,PSMD8,UBB,H2AC13,H2AC15,H2AC14,H2AC16,H2AC6,H2AC4,H2AC17,H2AC20,H2BC13,H2BC15,H2BC14,H2BC9,H2BC17,H2BC21,H2AC11,H2BC11,H2AC12,H2BC12,H2AW,H2AC21,H2BC18
2_Member	Reactome Gene Sets	R-HSA-5689603	UCH proteinases	-11.5131	-9.23083	18/102	3012,3013,5692,5714,7314,8329,8330,8331,8332,8334,8335,8336,8338,8969,85235,92815,221937,317772	H2AC8,H2AC7,PSMB4,PSMD8,UBB,H2AC13,H2AC15,H2AC14,H2AC16,H2AC6,H2AC4,H2AC17,H2AC20,H2AC11,H2AC12,H2AW,FOXK1,H2AC21
2_Member	Reactome Gene Sets	R-HSA-5688426	Deubiquitination	-11.2521	-8.98464	29/298	3012,3013,3017,3018,5692,5714,7314,8329,8330,8331,8332,8334,8335,8336,8338,8340,8341,8342,8345,8348,8349,8969,8970,85235,85236,92815,221937,317772,440689	H2AC8,H2AC7,H2BC5,H2BC3,PSMB4,PSMD8,UBB,H2AC13,H2AC15,H2AC14,H2AC16,H2AC6,H2AC4,H2AC17,H2AC20,H2BC13,H2BC15,H2BC14,H2BC9,H2BC17,H2BC21,H2AC11,H2BC11,H2AC12,H2BC12,H2AW,FOXK1,H2AC21,H2BC18
2_Member	KEGG Pathway	hsa04217	Necroptosis	-5.95343	-3.77109	15/159	3012,3013,3718,8329,8330,8331,8332,8334,8335,8336,8338,8969,85235,92815,317772	H2AC8,H2AC7,JAK3,H2AC13,H2AC15,H2AC14,H2AC16,H2AC6,H2AC4,H2AC17,H2AC20,H2AC11,H2AC12,H2AW,H2AC21
3_Summary	Reactome Gene Sets	R-HSA-1266695	Interleukin-7 signaling	-14.2833	-11.966	14/36	3667,3718,8350,8351,8352,8353,8354,8355,8356,8357,8358,8503,8968,653604,3021,6720,648,8091,9759,10336,57673,64783,201161,894,3087,3576,4914,5154,5327,7102,8938,388,708,747,2149,2151,2790,3778,4602,4842,5768,5874,6404,6520,8140,8515,8527,10125,27040,55083,55619,3589,3726,3911,3976,5692,5714,6175,6657,6888,7314,7335,9021,10148,57162,115004,3665,9636,9966	IRS1,JAK3,H3C1,H3C4,H3C3,H3C6,H3C11,H3C8,H3C12,H3C10,H3C2,PIK3R3,H3C7,H3C13,H3-3B,SREBF1,BMI1,HMGA2,HDAC4,PCGF3,BEND3,RBM15,CENPV,CCND2,HHEX,CXCL8,NTRK1,PDGFA,PLAT,TSPAN7,BAIAP3,RHOB,C1QBP,DAGLA,F2R,F2RL2,GNG10,KCNMA1,MYB,NOS1,QSOX1,RAB27B,SELPLG,SLC3A2,SLC7A5,ITGA10,DGKD,RASGRP1,LAT,KIF26B,DOCK10,IL11,JUNB,LAMA5,LIF,PSMB4,PSMD8,RPLP0,SOX2,TALDO1,UBB,UBE2V1,SOCS3,EBI3,PELI1,CGAS,IRF7,ISG15,TNFSF15
3_Member	Reactome Gene Sets	R-HSA-1266695	Interleukin-7 signaling	-14.2833	-11.966	14/36	3667,3718,8350,8351,8352,8353,8354,8355,8356,8357,8358,8503,8968,653604	IRS1,JAK3,H3C1,H3C4,H3C3,H3C6,H3C11,H3C8,H3C12,H3C10,H3C2,PIK3R3,H3C7,H3C13
3_Member	WikiPathways	WP4320	Effect of progerin on genes involved in Hutchinson-Gilford progeria syndrome	-12.289	-9.99152	13/39	3021,6720,8350,8351,8352,8353,8354,8355,8356,8357,8358,8968,653604	H3-3B,SREBF1,H3C1,H3C4,H3C3,H3C6,H3C11,H3C8,H3C12,H3C10,H3C2,H3C7,H3C13
3_Member	WikiPathways	WP4553	FBXL10 enhancement of MAP/ERK signaling in diffuse large B-cell lymphoma	-11.0698	-8.80586	12/38	3021,8350,8351,8352,8353,8354,8355,8356,8357,8358,8968,653604	H3-3B,H3C1,H3C4,H3C3,H3C6,H3C11,H3C8,H3C12,H3C10,H3C2,H3C7,H3C13
3_Member	GO Biological Processes	GO:0040029	regulation of gene expression, epigenetic	-10.6002	-8.33985	18/115	648,3021,8091,8350,8351,8352,8353,8354,8355,8356,8357,8358,8968,9759,10336,57673,64783,201161	BMI1,H3-3B,HMGA2,H3C1,H3C4,H3C3,H3C6,H3C11,H3C8,H3C12,H3C10,H3C2,H3C7,HDAC4,PCGF3,BEND3,RBM15,CENPV
3_Member	KEGG Pathway	hsa05202	Transcriptional misregulation in cancer	-10.0507	-7.79394	22/192	648,894,3021,3087,3576,4914,5154,5327,7102,8091,8350,8351,8352,8353,8354,8355,8356,8357,8358,8938,8968,653604	BMI1,CCND2,H3-3B,HHEX,CXCL8,NTRK1,PDGFA,PLAT,TSPAN7,HMGA2,H3C1,H3C4,H3C3,H3C6,H3C11,H3C8,H3C12,H3C10,H3C2,BAIAP3,H3C7,H3C13
3_Member	Reactome Gene Sets	R-HSA-109582	Hemostasis	-7.50227	-5.27944	36/621	388,708,747,2149,2151,2790,3021,3778,4602,4842,5154,5327,5768,5874,6404,6520,7102,8140,8350,8351,8352,8353,8354,8355,8356,8357,8358,8503,8515,8527,8968,10125,27040,55083,55619,653604	RHOB,C1QBP,DAGLA,F2R,F2RL2,GNG10,H3-3B,KCNMA1,MYB,NOS1,PDGFA,PLAT,QSOX1,RAB27B,SELPLG,SLC3A2,TSPAN7,SLC7A5,H3C1,H3C4,H3C3,H3C6,H3C11,H3C8,H3C12,H3C10,H3C2,PIK3R3,ITGA10,DGKD,H3C7,RASGRP1,LAT,KIF26B,DOCK10,H3C13
3_Member	Reactome Gene Sets	R-HSA-449147	Signaling by Interleukins	-6.87358	-4.65723	29/462	3576,3589,3667,3718,3726,3911,3976,5692,5714,6175,6657,6888,7314,7335,8350,8351,8352,8353,8354,8355,8356,8357,8358,8503,8968,9021,10148,57162,653604	CXCL8,IL11,IRS1,JAK3,JUNB,LAMA5,LIF,PSMB4,PSMD8,RPLP0,SOX2,TALDO1,UBB,UBE2V1,H3C1,H3C4,H3C3,H3C6,H3C11,H3C8,H3C12,H3C10,H3C2,PIK3R3,H3C7,SOCS3,EBI3,PELI1,H3C13
3_Member	Reactome Gene Sets	R-HSA-983231	Factors involved in megakaryocyte development and platelet production	-5.65201	-3.4843	15/168	3021,4602,8350,8351,8352,8353,8354,8355,8356,8357,8358,8968,55083,55619,653604	H3-3B,MYB,H3C1,H3C4,H3C3,H3C6,H3C11,H3C8,H3C12,H3C10,H3C2,H3C7,KIF26B,DOCK10,H3C13
3_Member	KEGG Pathway	hsa05131	Shigellosis	-4.79081	-2.65631	17/247	3021,3576,7314,7335,8350,8351,8352,8353,8354,8355,8356,8357,8358,8503,8968,115004,653604	H3-3B,CXCL8,UBB,UBE2V1,H3C1,H3C4,H3C3,H3C6,H3C11,H3C8,H3C12,H3C10,H3C2,PIK3R3,H3C7,CGAS,H3C13
3_Member	Reactome Gene Sets	R-HSA-1280215	Cytokine Signaling in Immune system	-4.40329	-2.31906	32/715	3576,3589,3665,3667,3718,3726,3911,3976,5692,5714,6175,6657,6888,7314,7335,8350,8351,8352,8353,8354,8355,8356,8357,8358,8503,8968,9021,9636,9966,10148,57162,653604	CXCL8,IL11,IRF7,IRS1,JAK3,JUNB,LAMA5,LIF,PSMB4,PSMD8,RPLP0,SOX2,TALDO1,UBB,UBE2V1,H3C1,H3C4,H3C3,H3C6,H3C11,H3C8,H3C12,H3C10,H3C2,PIK3R3,H3C7,SOCS3,ISG15,TNFSF15,EBI3,PELI1,H3C13
4_Summary	Reactome Gene Sets	R-HSA-8866654	E3 ubiquitin ligases ubiquitinate target proteins	-7.53735	-5.31124	11/59	3017,3018,7314,8340,8341,8342,8345,8348,8970,85236,220441,3008,5734,8351	H2BC5,H2BC3,UBB,H2BC13,H2BC15,H2BC14,H2BC9,H2BC17,H2BC11,H2BC12,RNF152,H1-4,PTGER4,H3C4
4_Member	Reactome Gene Sets	R-HSA-8866654	E3 ubiquitin ligases ubiquitinate target proteins	-7.53735	-5.31124	11/59	3017,3018,7314,8340,8341,8342,8345,8348,8970,85236,220441	H2BC5,H2BC3,UBB,H2BC13,H2BC15,H2BC14,H2BC9,H2BC17,H2BC11,H2BC12,RNF152
4_Member	Reactome Gene Sets	R-HSA-8852135	Protein ubiquitination	-6.18956	-3.99516	11/79	3017,3018,7314,8340,8341,8342,8345,8348,8970,85236,220441	H2BC5,H2BC3,UBB,H2BC13,H2BC15,H2BC14,H2BC9,H2BC17,H2BC11,H2BC12,RNF152
4_Member	WikiPathways	WP4286	Genotoxicity pathway	-2.73193	-0.91158	6/63	3008,3018,5734,8341,8342,8351	H1-4,H2BC3,PTGER4,H2BC15,H2BC14,H3C4
5_Summary	Reactome Gene Sets	R-HSA-140342	Apoptosis induced DNA fragmentation	-6.9517	-4.73212	6/13	1676,3006,3007,3008,3009,3024,8091,57673,708,1029,1630,5366,5692,5714,7159,7314,57162,115004	DFFA,H1-2,H1-3,H1-4,H1-5,H1-1,HMGA2,BEND3,C1QBP,CDKN2A,DCC,PMAIP1,PSMB4,PSMD8,TP53BP2,UBB,PELI1,CGAS
5_Member	Reactome Gene Sets	R-HSA-140342	Apoptosis induced DNA fragmentation	-6.9517	-4.73212	6/13	1676,3006,3007,3008,3009,3024	DFFA,H1-2,H1-3,H1-4,H1-5,H1-1
5_Member	Reactome Gene Sets	R-HSA-2559584	Formation of Senescence-Associated Heterochromatin Foci (SAHF)	-6.30557	-4.09876	6/16	3006,3007,3008,3009,3024,8091	H1-2,H1-3,H1-4,H1-5,H1-1,HMGA2
5_Member	GO Biological Processes	GO:0098532	histone H3-K27 trimethylation	-5.59063	-3.42578	4/6	3006,3007,3008,57673	H1-2,H1-3,H1-4,BEND3
5_Member	GO Biological Processes	GO:0016584	nucleosome positioning	-4.73978	-2.61058	5/17	3006,3007,3008,3009,3024	H1-2,H1-3,H1-4,H1-5,H1-1
5_Member	GO Biological Processes	GO:0070734	histone H3-K27 methylation	-4.68777	-2.56897	4/9	3006,3007,3008,57673	H1-2,H1-3,H1-4,BEND3
5_Member	Reactome Gene Sets	R-HSA-109581	Apoptosis	-4.63157	-2.51789	14/180	708,1029,1630,1676,3006,3007,3008,3009,3024,5366,5692,5714,7159,7314	C1QBP,CDKN2A,DCC,DFFA,H1-2,H1-3,H1-4,H1-5,H1-1,PMAIP1,PSMB4,PSMD8,TP53BP2,UBB
5_Member	Reactome Gene Sets	R-HSA-5357801	Programmed Cell Death	-4.48386	-2.38515	15/210	708,1029,1630,1676,3006,3007,3008,3009,3024,5366,5692,5714,7159,7314,57162	C1QBP,CDKN2A,DCC,DFFA,H1-2,H1-3,H1-4,H1-5,H1-1,PMAIP1,PSMB4,PSMD8,TP53BP2,UBB,PELI1
5_Member	GO Biological Processes	GO:0030261	chromosome condensation	-3.62875	-1.64568	6/43	3006,3007,3008,3009,3024,8091	H1-2,H1-3,H1-4,H1-5,H1-1,HMGA2
5_Member	GO Biological Processes	GO:0045910	negative regulation of DNA recombination	-3.51802	-1.54973	6/45	3006,3007,3008,3009,3024,115004	H1-2,H1-3,H1-4,H1-5,H1-1,CGAS
5_Member	Reactome Gene Sets	R-HSA-75153	Apoptotic execution phase	-3.17285	-1.27177	6/52	1676,3006,3007,3008,3009,3024	DFFA,H1-2,H1-3,H1-4,H1-5,H1-1
5_Member	GO Biological Processes	GO:0080182	histone H3-K4 trimethylation	-3.01624	-1.14358	4/22	3006,3007,3008,57673	H1-2,H1-3,H1-4,BEND3
5_Member	GO Biological Processes	GO:0051053	negative regulation of DNA metabolic process	-2.40034	-0.68611	8/123	1676,3006,3007,3008,3009,3024,8091,115004	DFFA,H1-2,H1-3,H1-4,H1-5,H1-1,HMGA2,CGAS
5_Member	GO Biological Processes	GO:0018023	peptidyl-lysine trimethylation	-2.00834	-0.415889	4/41	3006,3007,3008,57673	H1-2,H1-3,H1-4,BEND3
5_Member	GO Biological Processes	GO:0051568	histone H3-K4 methylation	-2.00834	-0.415889	4/41	3006,3007,3008,57673	H1-2,H1-3,H1-4,BEND3
6_Summary	KEGG Pathway	hsa05200	Pathways in cancer	-6.60893	-4.39578	31/531	652,894,1021,1029,1282,1284,1287,1630,2149,2250,2535,2790,3576,3714,3718,3911,4041,4914,5154,5366,5734,6608,7012,8326,8503,8643,9618,10125,10297,112398,112399,5287,55502,1741,5649,8515,9636,57801,2303,9518,6604,399694	BMP4,CCND2,CDK6,CDKN2A,COL4A1,COL4A2,COL4A5,DCC,F2R,FGF5,FZD2,GNG10,CXCL8,JAG2,JAK3,LAMA5,LRP5,NTRK1,PDGFA,PMAIP1,PTGER4,SMO,TERC,FZD9,PIK3R3,PTCH2,TRAF4,RASGRP1,APC2,EGLN2,EGLN3,PIK3C2B,HES6,DLG3,RELN,ITGA10,ISG15,HES4,FOXC2,GDF15,SMARCD3,SHC4
6_Member	KEGG Pathway	hsa05200	Pathways in cancer	-6.60893	-4.39578	31/531	652,894,1021,1029,1282,1284,1287,1630,2149,2250,2535,2790,3576,3714,3718,3911,4041,4914,5154,5366,5734,6608,7012,8326,8503,8643,9618,10125,10297,112398,112399	BMP4,CCND2,CDK6,CDKN2A,COL4A1,COL4A2,COL4A5,DCC,F2R,FGF5,FZD2,GNG10,CXCL8,JAG2,JAK3,LAMA5,LRP5,NTRK1,PDGFA,PMAIP1,PTGER4,SMO,TERC,FZD9,PIK3R3,PTCH2,TRAF4,RASGRP1,APC2,EGLN2,EGLN3
6_Member	WikiPathways	WP4787	Osteoblast differentiation and related diseases	-3.71685	-1.72042	10/120	652,2250,2535,3714,4041,5287,6608,8326,8503,55502	BMP4,FGF5,FZD2,JAG2,LRP5,PIK3C2B,SMO,FZD9,PIK3R3,HES6
6_Member	KEGG Pathway	hsa05165	Human papillomavirus infection	-3.25294	-1.3295	17/331	894,1021,1282,1284,1287,1741,2535,3911,5649,5734,8326,8503,8515,9636,10297,55502,57801	CCND2,CDK6,COL4A1,COL4A2,COL4A5,DLG3,FZD2,LAMA5,RELN,PTGER4,FZD9,PIK3R3,ITGA10,ISG15,APC2,HES6,HES4
6_Member	WikiPathways	WP4239	Epithelial to mesenchymal transition in colorectal cancer	-2.64239	-0.853212	10/165	1282,1284,1287,2303,2535,3714,4041,8326,8503,9518	COL4A1,COL4A2,COL4A5,FOXC2,FZD2,JAG2,LRP5,FZD9,PIK3R3,GDF15
6_Member	KEGG Pathway	hsa05225	Hepatocellular carcinoma	-2.58549	-0.817448	10/168	1021,1029,2535,4041,6604,7012,8326,8503,10297,399694	CDK6,CDKN2A,FZD2,LRP5,SMARCD3,TERC,FZD9,PIK3R3,APC2,SHC4
6_Member	KEGG Pathway	hsa05224	Breast cancer	-2.45978	-0.729043	9/147	1021,2250,2535,3714,4041,8326,8503,10297,399694	CDK6,FGF5,FZD2,JAG2,LRP5,FZD9,PIK3R3,APC2,SHC4
6_Member	WikiPathways	WP4262	Breast cancer pathway	-2.2731	-0.590118	9/157	1021,2250,2535,3714,4041,8326,8503,10297,399694	CDK6,FGF5,FZD2,JAG2,LRP5,FZD9,PIK3R3,APC2,SHC4
7_Summary	GO Biological Processes	GO:0048858	cell projection morphogenesis	-6.33155	-4.12158	28/463	288,1630,1742,1826,1907,1952,1969,2044,2050,3730,3911,4133,4192,4681,4803,4914,5649,6608,7162,7314,9369,10642,23769,54910,55619,84446,114798,203447,3276,11020,23154,50810,57465,1465,59277,168002,652,1839,1880,2826,3576,5154,7857,393,3949,3976,6604,6664,26045,55502,375790	ANK3,DCC,DLG4,DSCAM,EDN2,CELSR2,EPHA2,EPHA5,EPHB4,ANOS1,LAMA5,MAP2,MDK,NBL1,NGF,NTRK1,RELN,SMO,TPBG,UBB,NRXN3,IGF2BP1,FLRT1,SEMA4C,DOCK10,BRSK1,SLITRK1,NRK,PRMT1,IFT27,NCDN,HDGFL3,TBC1D24,CSRP1,NTN4,DACT2,BMP4,HBEGF,GPR183,CCR10,CXCL8,PDGFA,SCG2,ARHGAP4,LDLR,LIF,SMARCD3,SOX11,LRRTM2,HES6,AGRN
7_Member	GO Biological Processes	GO:0048858	cell projection morphogenesis	-6.33155	-4.12158	28/463	288,1630,1742,1826,1907,1952,1969,2044,2050,3730,3911,4133,4192,4681,4803,4914,5649,6608,7162,7314,9369,10642,23769,54910,55619,84446,114798,203447	ANK3,DCC,DLG4,DSCAM,EDN2,CELSR2,EPHA2,EPHA5,EPHB4,ANOS1,LAMA5,MAP2,MDK,NBL1,NGF,NTRK1,RELN,SMO,TPBG,UBB,NRXN3,IGF2BP1,FLRT1,SEMA4C,DOCK10,BRSK1,SLITRK1,NRK
7_Member	GO Biological Processes	GO:0032990	cell part morphogenesis	-5.98598	-3.79765	28/482	288,1630,1742,1826,1907,1952,1969,2044,2050,3730,3911,4133,4192,4681,4803,4914,5649,6608,7162,7314,9369,10642,23769,54910,55619,84446,114798,203447	ANK3,DCC,DLG4,DSCAM,EDN2,CELSR2,EPHA2,EPHA5,EPHB4,ANOS1,LAMA5,MAP2,MDK,NBL1,NGF,NTRK1,RELN,SMO,TPBG,UBB,NRXN3,IGF2BP1,FLRT1,SEMA4C,DOCK10,BRSK1,SLITRK1,NRK
7_Member	GO Biological Processes	GO:0048812	neuron projection morphogenesis	-5.96961	-3.78429	27/455	288,1630,1742,1826,1907,1952,1969,2044,2050,3730,3911,4133,4681,4803,4914,5649,6608,7162,7314,9369,10642,23769,54910,55619,84446,114798,203447	ANK3,DCC,DLG4,DSCAM,EDN2,CELSR2,EPHA2,EPHA5,EPHB4,ANOS1,LAMA5,MAP2,NBL1,NGF,NTRK1,RELN,SMO,TPBG,UBB,NRXN3,IGF2BP1,FLRT1,SEMA4C,DOCK10,BRSK1,SLITRK1,NRK
7_Member	GO Biological Processes	GO:0120039	plasma membrane bounded cell projection morphogenesis	-5.89719	-3.72076	27/459	288,1630,1742,1826,1907,1952,1969,2044,2050,3730,3911,4133,4681,4803,4914,5649,6608,7162,7314,9369,10642,23769,54910,55619,84446,114798,203447	ANK3,DCC,DLG4,DSCAM,EDN2,CELSR2,EPHA2,EPHA5,EPHB4,ANOS1,LAMA5,MAP2,NBL1,NGF,NTRK1,RELN,SMO,TPBG,UBB,NRXN3,IGF2BP1,FLRT1,SEMA4C,DOCK10,BRSK1,SLITRK1,NRK
7_Member	GO Biological Processes	GO:0031175	neuron projection development	-5.36964	-3.21047	32/639	288,1630,1742,1826,1907,1952,1969,2044,2050,3276,3730,3911,4133,4681,4803,4914,5649,6608,7162,7314,9369,10642,11020,23154,23769,50810,54910,55619,57465,84446,114798,203447	ANK3,DCC,DLG4,DSCAM,EDN2,CELSR2,EPHA2,EPHA5,EPHB4,PRMT1,ANOS1,LAMA5,MAP2,NBL1,NGF,NTRK1,RELN,SMO,TPBG,UBB,NRXN3,IGF2BP1,IFT27,NCDN,FLRT1,HDGFL3,SEMA4C,DOCK10,TBC1D24,BRSK1,SLITRK1,NRK
7_Member	GO Biological Processes	GO:0032989	cellular component morphogenesis	-5.00826	-2.86023	29/573	288,1465,1630,1742,1826,1907,1952,1969,2044,2050,3730,3911,4133,4192,4681,4803,4914,5649,6608,7162,7314,9369,10642,23769,54910,55619,84446,114798,203447	ANK3,CSRP1,DCC,DLG4,DSCAM,EDN2,CELSR2,EPHA2,EPHA5,EPHB4,ANOS1,LAMA5,MAP2,MDK,NBL1,NGF,NTRK1,RELN,SMO,TPBG,UBB,NRXN3,IGF2BP1,FLRT1,SEMA4C,DOCK10,BRSK1,SLITRK1,NRK
7_Member	GO Biological Processes	GO:0048667	cell morphogenesis involved in neuron differentiation	-4.29839	-2.22594	22/411	288,1630,1742,1826,1907,1952,1969,2044,2050,3730,3911,4133,4914,5649,6608,7162,9369,10642,54910,55619,84446,114798	ANK3,DCC,DLG4,DSCAM,EDN2,CELSR2,EPHA2,EPHA5,EPHB4,ANOS1,LAMA5,MAP2,NTRK1,RELN,SMO,TPBG,NRXN3,IGF2BP1,SEMA4C,DOCK10,BRSK1,SLITRK1
7_Member	GO Biological Processes	GO:0000902	cell morphogenesis	-4.13388	-2.08166	30/673	288,1630,1742,1826,1907,1952,1969,2044,2050,3730,3911,4133,4192,4681,4803,4914,5649,6608,7162,7314,9369,10642,23769,54910,55619,59277,84446,114798,168002,203447	ANK3,DCC,DLG4,DSCAM,EDN2,CELSR2,EPHA2,EPHA5,EPHB4,ANOS1,LAMA5,MAP2,MDK,NBL1,NGF,NTRK1,RELN,SMO,TPBG,UBB,NRXN3,IGF2BP1,FLRT1,SEMA4C,DOCK10,NTN4,BRSK1,SLITRK1,DACT2,NRK
7_Member	GO Biological Processes	GO:0000904	cell morphogenesis involved in differentiation	-3.61893	-1.6396	24/522	288,1630,1742,1826,1907,1952,1969,2044,2050,3730,3911,4133,4914,5649,6608,7162,9369,10642,54910,55619,59277,84446,114798,168002	ANK3,DCC,DLG4,DSCAM,EDN2,CELSR2,EPHA2,EPHA5,EPHB4,ANOS1,LAMA5,MAP2,NTRK1,RELN,SMO,TPBG,NRXN3,IGF2BP1,SEMA4C,DOCK10,NTN4,BRSK1,SLITRK1,DACT2
7_Member	GO Biological Processes	GO:0006935	chemotaxis	-3.04669	-1.1624	22/506	652,1630,1826,1839,1880,1907,1969,2044,2050,2826,3576,3730,3911,4192,4914,5154,5649,6608,7162,7857,9369,54910	BMP4,DCC,DSCAM,HBEGF,GPR183,EDN2,EPHA2,EPHA5,EPHB4,CCR10,CXCL8,ANOS1,LAMA5,MDK,NTRK1,PDGFA,RELN,SMO,TPBG,SCG2,NRXN3,SEMA4C
7_Member	GO Biological Processes	GO:0042330	taxis	-3.00271	-1.1317	22/510	652,1630,1826,1839,1880,1907,1969,2044,2050,2826,3576,3730,3911,4192,4914,5154,5649,6608,7162,7857,9369,54910	BMP4,DCC,DSCAM,HBEGF,GPR183,EDN2,EPHA2,EPHA5,EPHB4,CCR10,CXCL8,ANOS1,LAMA5,MDK,NTRK1,PDGFA,RELN,SMO,TPBG,SCG2,NRXN3,SEMA4C
7_Member	GO Biological Processes	GO:0051960	regulation of nervous system development	-2.68655	-0.881446	19/439	393,1630,1826,3949,3976,4133,4192,4803,4914,5649,6604,6608,6664,7162,26045,54910,55502,114798,375790	ARHGAP4,DCC,DSCAM,LDLR,LIF,MAP2,MDK,NGF,NTRK1,RELN,SMARCD3,SMO,SOX11,TPBG,LRRTM2,SEMA4C,HES6,SLITRK1,AGRN
7_Member	GO Biological Processes	GO:0007409	axonogenesis	-2.6785	-0.874635	16/342	288,1630,1826,1907,1969,2044,2050,3730,3911,4914,5649,6608,9369,54910,84446,114798	ANK3,DCC,DSCAM,EDN2,EPHA2,EPHA5,EPHB4,ANOS1,LAMA5,NTRK1,RELN,SMO,NRXN3,SEMA4C,BRSK1,SLITRK1
7_Member	GO Biological Processes	GO:0007411	axon guidance	-2.56137	-0.802392	12/227	1630,1826,1969,2044,2050,3730,3911,4914,5649,6608,9369,54910	DCC,DSCAM,EPHA2,EPHA5,EPHB4,ANOS1,LAMA5,NTRK1,RELN,SMO,NRXN3,SEMA4C
7_Member	GO Biological Processes	GO:0097485	neuron projection guidance	-2.54583	-0.791325	12/228	1630,1826,1969,2044,2050,3730,3911,4914,5649,6608,9369,54910	DCC,DSCAM,EPHA2,EPHA5,EPHB4,ANOS1,LAMA5,NTRK1,RELN,SMO,NRXN3,SEMA4C
7_Member	GO Biological Processes	GO:0051962	positive regulation of nervous system development	-2.39498	-0.682776	13/269	1826,3976,4192,4803,4914,5649,6604,6608,6664,7162,26045,114798,375790	DSCAM,LIF,MDK,NGF,NTRK1,RELN,SMARCD3,SMO,SOX11,TPBG,LRRTM2,SLITRK1,AGRN
7_Member	GO Biological Processes	GO:0061564	axon development	-2.23742	-0.562828	16/380	288,1630,1826,1907,1969,2044,2050,3730,3911,4914,5649,6608,9369,54910,84446,114798	ANK3,DCC,DSCAM,EDN2,EPHA2,EPHA5,EPHB4,ANOS1,LAMA5,NTRK1,RELN,SMO,NRXN3,SEMA4C,BRSK1,SLITRK1
7_Member	GO Biological Processes	GO:0050767	regulation of neurogenesis	-2.08093	-0.458919	15/361	393,1630,1826,3949,3976,4133,4192,4803,5649,6604,6608,6664,54910,55502,114798	ARHGAP4,DCC,DSCAM,LDLR,LIF,MAP2,MDK,NGF,RELN,SMARCD3,SMO,SOX11,SEMA4C,HES6,SLITRK1
8_Summary	Reactome Gene Sets	R-HSA-422475	Axon guidance	-6.24656	-4.04289	31/552	288,388,1282,1284,1287,1630,1741,1742,1826,1969,2044,2050,5649,5692,5714,6170,6171,6175,6193,6218,6224,6228,6230,6235,6331,7314,8503,8515,8912,59277,375790,8665,8666,1081,1757,2653,5723,5831,6520,8140,23464,29920,54498,256987,2539,2687,3692,4248,9718,10643,23457,27161,51022,51023,51069,64951,80755,84273,467,72,3007,8342,10642,51631,64928,1839,3576,9636,115004,79897	ANK3,RHOB,COL4A1,COL4A2,COL4A5,DCC,DLG3,DLG4,DSCAM,EPHA2,EPHA5,EPHB4,RELN,PSMB4,PSMD8,RPL39,RPL41,RPLP0,RPS5,RPS17,RPS20,RPS23,RPS25,RPS29,SCN5A,UBB,PIK3R3,ITGA10,CACNA1H,NTN4,AGRN,EIF3F,EIF3G,CGA,SARDH,GCSH,PSPH,PYCR1,SLC3A2,SLC7A5,GCAT,PYCR2,SMOX,SERINC5,G6PD,GGT5,EIF6,MGAT3,ECE2,IGF2BP3,ABCB9,AGO2,GLRX2,MRPS18C,MRPL2,MRPS24,AARSD1,NOA1,ATF3,ACTG2,H1-3,H2BC14,IGF2BP1,LUC7L2,MRPL14,HBEGF,CXCL8,I…
8_Member	Reactome Gene Sets	R-HSA-422475	Axon guidance	-6.24656	-4.04289	31/552	288,388,1282,1284,1287,1630,1741,1742,1826,1969,2044,2050,5649,5692,5714,6170,6171,6175,6193,6218,6224,6228,6230,6235,6331,7314,8503,8515,8912,59277,375790	ANK3,RHOB,COL4A1,COL4A2,COL4A5,DCC,DLG3,DLG4,DSCAM,EPHA2,EPHA5,EPHB4,RELN,PSMB4,PSMD8,RPL39,RPL41,RPLP0,RPS5,RPS17,RPS20,RPS23,RPS25,RPS29,SCN5A,UBB,PIK3R3,ITGA10,CACNA1H,NTN4,AGRN
8_Member	Reactome Gene Sets	R-HSA-9675108	Nervous system development	-5.8419	-3.6684	31/577	288,388,1282,1284,1287,1630,1741,1742,1826,1969,2044,2050,5649,5692,5714,6170,6171,6175,6193,6218,6224,6228,6230,6235,6331,7314,8503,8515,8912,59277,375790	ANK3,RHOB,COL4A1,COL4A2,COL4A5,DCC,DLG3,DLG4,DSCAM,EPHA2,EPHA5,EPHB4,RELN,PSMB4,PSMD8,RPL39,RPL41,RPLP0,RPS5,RPS17,RPS20,RPS23,RPS25,RPS29,SCN5A,UBB,PIK3R3,ITGA10,CACNA1H,NTN4,AGRN
8_Member	Reactome Gene Sets	R-HSA-72689	Formation of a pool of free 40S subunits	-5.12127	-2.96771	11/101	6170,6171,6175,6193,6218,6224,6228,6230,6235,8665,8666	RPL39,RPL41,RPLP0,RPS5,RPS17,RPS20,RPS23,RPS25,RPS29,EIF3F,EIF3G
8_Member	Reactome Gene Sets	R-HSA-72695	Formation of the ternary complex, and subsequently, the 43S complex	-5.05034	-2.89955	8/51	6193,6218,6224,6228,6230,6235,8665,8666	RPS5,RPS17,RPS20,RPS23,RPS25,RPS29,EIF3F,EIF3G
8_Member	Reactome Gene Sets	R-HSA-71291	Metabolism of amino acids and derivatives	-4.91916	-2.77659	22/374	1081,1757,2653,5692,5714,5723,5831,6170,6171,6175,6193,6218,6224,6228,6230,6235,6520,8140,23464,29920,54498,256987	CGA,SARDH,GCSH,PSMB4,PSMD8,PSPH,PYCR1,RPL39,RPL41,RPLP0,RPS5,RPS17,RPS20,RPS23,RPS25,RPS29,SLC3A2,SLC7A5,GCAT,PYCR2,SMOX,SERINC5
8_Member	Reactome Gene Sets	R-HSA-156827	L13a-mediated translational silencing of Ceruloplasmin expression	-4.72767	-2.60109	11/111	6170,6171,6175,6193,6218,6224,6228,6230,6235,8665,8666	RPL39,RPL41,RPLP0,RPS5,RPS17,RPS20,RPS23,RPS25,RPS29,EIF3F,EIF3G
8_Member	Reactome Gene Sets	R-HSA-72706	GTP hydrolysis and joining of the 60S ribosomal subunit	-4.69079	-2.56897	11/112	6170,6171,6175,6193,6218,6224,6228,6230,6235,8665,8666	RPL39,RPL41,RPLP0,RPS5,RPS17,RPS20,RPS23,RPS25,RPS29,EIF3F,EIF3G
8_Member	Reactome Gene Sets	R-HSA-72649	Translation initiation complex formation	-4.62653	-2.51789	8/58	6193,6218,6224,6228,6230,6235,8665,8666	RPS5,RPS17,RPS20,RPS23,RPS25,RPS29,EIF3F,EIF3G
8_Member	Reactome Gene Sets	R-HSA-72702	Ribosomal scanning and start codon recognition	-4.62653	-2.51789	8/58	6193,6218,6224,6228,6230,6235,8665,8666	RPS5,RPS17,RPS20,RPS23,RPS25,RPS29,EIF3F,EIF3G
8_Member	Reactome Gene Sets	R-HSA-72662	Activation of the mRNA upon binding of the cap-binding complex and eIFs, and subsequent binding to 43S	-4.57107	-2.46742	8/59	6193,6218,6224,6228,6230,6235,8665,8666	RPS5,RPS17,RPS20,RPS23,RPS25,RPS29,EIF3F,EIF3G
8_Member	GO Biological Processes	GO:0006518	peptide metabolic process	-4.47197	-2.37571	25/489	2539,2687,3692,4248,6170,6171,6175,6193,6218,6224,6228,6230,6235,8665,8666,9718,10643,23457,27161,51022,51023,51069,64951,80755,84273	G6PD,GGT5,EIF6,MGAT3,RPL39,RPL41,RPLP0,RPS5,RPS17,RPS20,RPS23,RPS25,RPS29,EIF3F,EIF3G,ECE2,IGF2BP3,ABCB9,AGO2,GLRX2,MRPS18C,MRPL2,MRPS24,AARSD1,NOA1
8_Member	CORUM	CORUM:338	40S ribosomal subunit, cytoplasmic	-4.45605	-2.36222	6/31	6193,6218,6224,6228,6230,6235	RPS5,RPS17,RPS20,RPS23,RPS25,RPS29
8_Member	Reactome Gene Sets	R-HSA-72613	Eukaryotic Translation Initiation	-4.4439	-2.3549	11/119	6170,6171,6175,6193,6218,6224,6228,6230,6235,8665,8666	RPL39,RPL41,RPLP0,RPS5,RPS17,RPS20,RPS23,RPS25,RPS29,EIF3F,EIF3G
8_Member	Reactome Gene Sets	R-HSA-72737	Cap-dependent Translation Initiation	-4.4439	-2.3549	11/119	6170,6171,6175,6193,6218,6224,6228,6230,6235,8665,8666	RPL39,RPL41,RPLP0,RPS5,RPS17,RPS20,RPS23,RPS25,RPS29,EIF3F,EIF3G
8_Member	CORUM	CORUM:306	Ribosome, cytoplasmic	-4.40724	-2.32063	9/80	6170,6171,6175,6193,6218,6224,6228,6230,6235	RPL39,RPL41,RPLP0,RPS5,RPS17,RPS20,RPS23,RPS25,RPS29
8_Member	Reactome Gene Sets	R-HSA-9633012	Response of EIF2AK4 (GCN2) to amino acid deficiency	-4.34712	-2.2676	10/101	467,6170,6171,6175,6193,6218,6224,6228,6230,6235	ATF3,RPL39,RPL41,RPLP0,RPS5,RPS17,RPS20,RPS23,RPS25,RPS29
8_Member	CORUM	CORUM:305	40S ribosomal subunit, cytoplasmic	-4.29387	-2.22594	6/33	6193,6218,6224,6228,6230,6235	RPS5,RPS17,RPS20,RPS23,RPS25,RPS29
8_Member	Reactome Gene Sets	R-HSA-9010553	Regulation of expression of SLITs and ROBOs	-4.24097	-2.17758	13/171	1287,5692,5714,6170,6171,6175,6193,6218,6224,6228,6230,6235,7314	COL4A5,PSMB4,PSMD8,RPL39,RPL41,RPLP0,RPS5,RPS17,RPS20,RPS23,RPS25,RPS29,UBB
8_Member	CORUM	CORUM:3055	Nop56p-associated pre-rRNA complex	-4.2379	-2.17677	10/104	72,3007,6170,6175,6218,6228,6235,8342,10642,51631	ACTG2,H1-3,RPL39,RPLP0,RPS17,RPS23,RPS29,H2BC14,IGF2BP1,LUC7L2
8_Member	GO Biological Processes	GO:0043043	peptide biosynthetic process	-4.19838	-2.13949	20/359	2687,3692,6170,6171,6175,6193,6218,6224,6228,6230,6235,8665,8666,10643,27161,51023,51069,64951,80755,84273	GGT5,EIF6,RPL39,RPL41,RPLP0,RPS5,RPS17,RPS20,RPS23,RPS25,RPS29,EIF3F,EIF3G,IGF2BP3,AGO2,MRPS18C,MRPL2,MRPS24,AARSD1,NOA1
8_Member	GO Biological Processes	GO:0006412	translation	-4.17231	-2.11788	19/332	3692,6170,6171,6175,6193,6218,6224,6228,6230,6235,8665,8666,10643,27161,51023,51069,64951,80755,84273	EIF6,RPL39,RPL41,RPLP0,RPS5,RPS17,RPS20,RPS23,RPS25,RPS29,EIF3F,EIF3G,IGF2BP3,AGO2,MRPS18C,MRPL2,MRPS24,AARSD1,NOA1
8_Member	Reactome Gene Sets	R-HSA-156902	Peptide chain elongation	-4.04031	-2.00112	9/89	6170,6171,6175,6193,6218,6224,6228,6230,6235	RPL39,RPL41,RPLP0,RPS5,RPS17,RPS20,RPS23,RPS25,RPS29
8_Member	Reactome Gene Sets	R-HSA-192823	Viral mRNA Translation	-4.04031	-2.00112	9/89	6170,6171,6175,6193,6218,6224,6228,6230,6235	RPL39,RPL41,RPLP0,RPS5,RPS17,RPS20,RPS23,RPS25,RPS29
8_Member	WikiPathways	WP477	Cytoplasmic ribosomal proteins	-4.00242	-1.96749	9/90	6170,6171,6175,6193,6218,6224,6228,6230,6235	RPL39,RPL41,RPLP0,RPS5,RPS17,RPS20,RPS23,RPS25,RPS29
8_Member	KEGG Pathway	hsa03010	Ribosome	-3.95578	-1.92924	12/158	6170,6171,6175,6193,6218,6224,6228,6230,6235,51023,51069,64928	RPL39,RPL41,RPLP0,RPS5,RPS17,RPS20,RPS23,RPS25,RPS29,MRPS18C,MRPL2,MRPL14
8_Member	Reactome Gene Sets	R-HSA-156842	Eukaryotic Translation Elongation	-3.8919	-1.87563	9/93	6170,6171,6175,6193,6218,6224,6228,6230,6235	RPL39,RPL41,RPLP0,RPS5,RPS17,RPS20,RPS23,RPS25,RPS29
8_Member	Reactome Gene Sets	R-HSA-2408557	Selenocysteine synthesis	-3.8919	-1.87563	9/93	6170,6171,6175,6193,6218,6224,6228,6230,6235	RPL39,RPL41,RPLP0,RPS5,RPS17,RPS20,RPS23,RPS25,RPS29
8_Member	Reactome Gene Sets	R-HSA-72764	Eukaryotic Translation Termination	-3.8919	-1.87563	9/93	6170,6171,6175,6193,6218,6224,6228,6230,6235	RPL39,RPL41,RPLP0,RPS5,RPS17,RPS20,RPS23,RPS25,RPS29
8_Member	Reactome Gene Sets	R-HSA-975956	Nonsense Mediated Decay (NMD) independent of the Exon Junction Complex (EJC)	-3.82071	-1.81048	9/95	6170,6171,6175,6193,6218,6224,6228,6230,6235	RPL39,RPL41,RPLP0,RPS5,RPS17,RPS20,RPS23,RPS25,RPS29
8_Member	Reactome Gene Sets	R-HSA-376176	Signaling by ROBO receptors	-3.73504	-1.73471	14/218	1287,1630,5692,5714,6170,6171,6175,6193,6218,6224,6228,6230,6235,7314	COL4A5,DCC,PSMB4,PSMD8,RPL39,RPL41,RPLP0,RPS5,RPS17,RPS20,RPS23,RPS25,RPS29,UBB
8_Member	KEGG Pathway	hsa05171	Coronavirus disease - COVID-19	-3.45842	-1.49913	14/232	1839,3576,6170,6171,6175,6193,6218,6224,6228,6230,6235,8503,9636,115004	HBEGF,CXCL8,RPL39,RPL41,RPLP0,RPS5,RPS17,RPS20,RPS23,RPS25,RPS29,PIK3R3,ISG15,CGAS
8_Member	GO Biological Processes	GO:0002181	cytoplasmic translation	-3.2843	-1.35592	9/112	6170,6171,6175,6193,6218,6224,6228,6230,6235	RPL39,RPL41,RPLP0,RPS5,RPS17,RPS20,RPS23,RPS25,RPS29
8_Member	Reactome Gene Sets	R-HSA-1799339	SRP-dependent cotranslational protein targeting to membrane	-3.2843	-1.35592	9/112	6170,6171,6175,6193,6218,6224,6228,6230,6235	RPL39,RPL41,RPLP0,RPS5,RPS17,RPS20,RPS23,RPS25,RPS29
8_Member	Reactome Gene Sets	R-HSA-927802	Nonsense-Mediated Decay (NMD)	-3.20065	-1.28854	9/115	6170,6171,6175,6193,6218,6224,6228,6230,6235	RPL39,RPL41,RPLP0,RPS5,RPS17,RPS20,RPS23,RPS25,RPS29
8_Member	Reactome Gene Sets	R-HSA-975957	Nonsense Mediated Decay (NMD) enhanced by the Exon Junction Complex (EJC)	-3.20065	-1.28854	9/115	6170,6171,6175,6193,6218,6224,6228,6230,6235	RPL39,RPL41,RPLP0,RPS5,RPS17,RPS20,RPS23,RPS25,RPS29
8_Member	Reactome Gene Sets	R-HSA-2408522	Selenoamino acid metabolism	-3.11985	-1.22801	9/118	6170,6171,6175,6193,6218,6224,6228,6230,6235	RPL39,RPL41,RPLP0,RPS5,RPS17,RPS20,RPS23,RPS25,RPS29
8_Member	Reactome Gene Sets	R-HSA-72766	Translation	-2.95319	-1.08937	15/291	6170,6171,6175,6193,6218,6224,6228,6230,6235,8665,8666,51023,51069,64928,64951	RPL39,RPL41,RPLP0,RPS5,RPS17,RPS20,RPS23,RPS25,RPS29,EIF3F,EIF3G,MRPS18C,MRPL2,MRPL14,MRPS24
8_Member	Reactome Gene Sets	R-HSA-168255	Influenza Infection	-2.82234	-0.982158	10/156	6170,6171,6175,6193,6218,6224,6228,6230,6235,9636	RPL39,RPL41,RPLP0,RPS5,RPS17,RPS20,RPS23,RPS25,RPS29,ISG15
8_Member	Reactome Gene Sets	R-HSA-9711097	Cellular response to starvation	-2.82234	-0.982158	10/156	467,6170,6171,6175,6193,6218,6224,6228,6230,6235	ATF3,RPL39,RPL41,RPLP0,RPS5,RPS17,RPS20,RPS23,RPS25,RPS29
8_Member	GO Biological Processes	GO:0006413	translational initiation	-2.73193	-0.91158	6/63	3692,6193,6218,8665,8666,27161	EIF6,RPS5,RPS17,EIF3F,EIF3G,AGO2
8_Member	Reactome Gene Sets	R-HSA-168273	Influenza Viral RNA Transcription and Replication	-2.70909	-0.892606	9/135	6170,6171,6175,6193,6218,6224,6228,6230,6235	RPL39,RPL41,RPLP0,RPS5,RPS17,RPS20,RPS23,RPS25,RPS29
8_Member	GO Biological Processes	GO:0043604	amide biosynthetic process	-2.67014	-0.873688	20/474	2687,3692,6170,6171,6175,6193,6218,6224,6228,6230,6235,8665,8666,10643,27161,51023,51069,64951,80755,84273	GGT5,EIF6,RPL39,RPL41,RPLP0,RPS5,RPS17,RPS20,RPS23,RPS25,RPS29,EIF3F,EIF3G,IGF2BP3,AGO2,MRPS18C,MRPL2,MRPS24,AARSD1,NOA1
8_Member	Reactome Gene Sets	R-HSA-6791226	Major pathway of rRNA processing in the nucleolus and cytosol	-2.30528	-0.612301	10/184	6170,6171,6175,6193,6218,6224,6228,6230,6235,79897	RPL39,RPL41,RPLP0,RPS5,RPS17,RPS20,RPS23,RPS25,RPS29,RPP21
8_Member	Reactome Gene Sets	R-HSA-8868773	rRNA processing in the nucleus and cytosol	-2.14789	-0.501046	10/194	6170,6171,6175,6193,6218,6224,6228,6230,6235,79897	RPL39,RPL41,RPLP0,RPS5,RPS17,RPS20,RPS23,RPS25,RPS29,RPP21
8_Member	Reactome Gene Sets	R-HSA-72312	rRNA processing	-2.00244	-0.415889	10/204	6170,6171,6175,6193,6218,6224,6228,6230,6235,79897	RPL39,RPL41,RPLP0,RPS5,RPS17,RPS20,RPS23,RPS25,RPS29,RPP21
9_Summary	GO Biological Processes	GO:0007169	transmembrane receptor protein tyrosine kinase signaling pathway	-5.9179	-3.73853	25/403	1282,1284,1287,1839,1969,2044,2050,2065,2069,2250,2303,3667,3718,4803,4914,5154,5327,6720,6909,8503,8527,9518,23769,84959,399694,652,656,3976,4488,28996,151742,894,1021,2149,2790,3911,4602,5649,8515,72,467,648,1029,2535,4041,4192,4217,6520,7004,8140,8326,8994,1500,1742,2354,3726,3730,7314,4842,5287	COL4A1,COL4A2,COL4A5,HBEGF,EPHA2,EPHA5,EPHB4,ERBB3,EREG,FGF5,FOXC2,IRS1,JAK3,NGF,NTRK1,PDGFA,PLAT,SREBF1,TBX2,PIK3R3,DGKD,GDF15,FLRT1,UBASH3B,SHC4,BMP4,BMP8B,LIF,MSX2,HIPK2,PPM1L,CCND2,CDK6,F2R,GNG10,LAMA5,MYB,RELN,ITGA10,ACTG2,ATF3,BMI1,CDKN2A,FZD2,LRP5,MDK,MAP3K5,SLC3A2,TEAD4,SLC7A5,FZD9,LIMD1,CTNND1,DLG4,FOSB,JUNB,ANOS1,UBB,NOS1,PIK3C2B
9_Member	GO Biological Processes	GO:0007169	transmembrane receptor protein tyrosine kinase signaling pathway	-5.9179	-3.73853	25/403	1282,1284,1287,1839,1969,2044,2050,2065,2069,2250,2303,3667,3718,4803,4914,5154,5327,6720,6909,8503,8527,9518,23769,84959,399694	COL4A1,COL4A2,COL4A5,HBEGF,EPHA2,EPHA5,EPHB4,ERBB3,EREG,FGF5,FOXC2,IRS1,JAK3,NGF,NTRK1,PDGFA,PLAT,SREBF1,TBX2,PIK3R3,DGKD,GDF15,FLRT1,UBASH3B,SHC4
9_Member	GO Biological Processes	GO:0007167	enzyme linked receptor protein signaling pathway	-5.47853	-3.31653	31/601	652,656,1282,1284,1287,1839,1969,2044,2050,2065,2069,2250,2303,3667,3718,3976,4488,4803,4914,5154,5327,6720,6909,8503,8527,9518,23769,28996,84959,151742,399694	BMP4,BMP8B,COL4A1,COL4A2,COL4A5,HBEGF,EPHA2,EPHA5,EPHB4,ERBB3,EREG,FGF5,FOXC2,IRS1,JAK3,LIF,MSX2,NGF,NTRK1,PDGFA,PLAT,SREBF1,TBX2,PIK3R3,DGKD,GDF15,FLRT1,HIPK2,UBASH3B,PPM1L,SHC4
9_Member	KEGG Pathway	hsa04151	PI3K-Akt signaling pathway	-4.77789	-2.64605	21/354	894,1021,1282,1284,1287,1969,2065,2069,2149,2250,2790,3667,3718,3911,4602,4803,4914,5154,5649,8503,8515	CCND2,CDK6,COL4A1,COL4A2,COL4A5,EPHA2,ERBB3,EREG,F2R,FGF5,GNG10,IRS1,JAK3,LAMA5,MYB,NGF,NTRK1,PDGFA,RELN,PIK3R3,ITGA10
9_Member	WikiPathways	WP5087	Malignant pleural mesothelioma	-4.65533	-2.53909	24/447	72,467,648,894,1029,1282,1284,1287,1839,1969,2250,2535,3911,4041,4192,4217,4803,4914,5154,6520,7004,8140,8326,8994	ACTG2,ATF3,BMI1,CCND2,CDKN2A,COL4A1,COL4A2,COL4A5,HBEGF,EPHA2,FGF5,FZD2,LAMA5,LRP5,MDK,MAP3K5,NGF,NTRK1,PDGFA,SLC3A2,TEAD4,SLC7A5,FZD9,LIMD1
9_Member	WikiPathways	WP4172	PI3K-Akt signaling pathway	-3.95336	-1.9289	19/345	894,1021,1282,1284,1287,1969,2149,2250,2790,3667,3718,3911,4602,4803,4914,5154,5649,8503,8515	CCND2,CDK6,COL4A1,COL4A2,COL4A5,EPHA2,F2R,FGF5,GNG10,IRS1,JAK3,LAMA5,MYB,NGF,NTRK1,PDGFA,RELN,PIK3R3,ITGA10
9_Member	Reactome Gene Sets	R-HSA-9006934	Signaling by Receptor Tyrosine Kinases	-3.24862	-1.32682	23/521	1282,1284,1287,1500,1742,1839,2065,2069,2250,2354,3667,3718,3726,3730,3911,4192,4803,4914,5154,5327,7314,8503,23769	COL4A1,COL4A2,COL4A5,CTNND1,DLG4,HBEGF,ERBB3,EREG,FGF5,FOSB,IRS1,JAK3,JUNB,ANOS1,LAMA5,MDK,NGF,NTRK1,PDGFA,PLAT,UBB,PIK3R3,FLRT1
9_Member	WikiPathways	WP3932	Focal adhesion: PI3K-Akt-mTOR-signaling pathway	-2.69809	-0.887646	15/309	1282,1284,1969,2149,2790,3667,3718,3911,4803,4842,5154,5287,5649,6720,8515	COL4A1,COL4A2,EPHA2,F2R,GNG10,IRS1,JAK3,LAMA5,NGF,NOS1,PDGFA,PIK3C2B,RELN,SREBF1,ITGA10
10_Summary	KEGG Pathway	hsa04390	Hippo signaling pathway	-5.3097	-3.15335	14/157	652,656,894,1741,1742,2535,6657,7004,7159,8326,8994,10297,85409,126374,1500,4192,7091,7162,84133,100507050,3090,467,1021,4041,3949,1952,3087,51421,79971,6608	BMP4,BMP8B,CCND2,DLG3,DLG4,FZD2,SOX2,TEAD4,TP53BP2,FZD9,LIMD1,APC2,NKD2,WTIP,CTNND1,MDK,TLE4,TPBG,ZNRF3,TPBGL,HIC1,ATF3,CDK6,LRP5,LDLR,CELSR2,HHEX,AMOTL2,WLS,SMO
10_Member	KEGG Pathway	hsa04390	Hippo signaling pathway	-5.3097	-3.15335	14/157	652,656,894,1741,1742,2535,6657,7004,7159,8326,8994,10297,85409,126374	BMP4,BMP8B,CCND2,DLG3,DLG4,FZD2,SOX2,TEAD4,TP53BP2,FZD9,LIMD1,APC2,NKD2,WTIP
10_Member	GO Biological Processes	GO:0090090	negative regulation of canonical Wnt signaling pathway	-3.13326	-1.23807	10/142	1500,4192,6657,7091,7162,8994,10297,84133,85409,100507050	CTNND1,MDK,SOX2,TLE4,TPBG,LIMD1,APC2,ZNRF3,NKD2,TPBGL
10_Member	GO Biological Processes	GO:0030178	negative regulation of Wnt signaling pathway	-3.0007	-1.13113	11/174	1500,3090,4192,6657,7091,7162,8994,10297,84133,85409,100507050	CTNND1,HIC1,MDK,SOX2,TLE4,TPBG,LIMD1,APC2,ZNRF3,NKD2,TPBGL
10_Member	WikiPathways	WP4258	lncRNA in canonical Wnt signaling and colorectal cancer	-2.85583	-1.00883	8/104	467,894,1021,2535,4041,8326,10297,85409	ATF3,CCND2,CDK6,FZD2,LRP5,FZD9,APC2,NKD2
10_Member	WikiPathways	WP399	Wnt signaling pathway and pluripotency	-2.77675	-0.941952	8/107	894,1500,2535,3949,4041,6657,8326,85409	CCND2,CTNND1,FZD2,LDLR,LRP5,SOX2,FZD9,NKD2
10_Member	GO Biological Processes	GO:0016055	Wnt signaling pathway	-2.59212	-0.82067	13/255	1500,1952,2535,3087,3090,4041,7091,8326,10297,51421,79971,84133,85409	CTNND1,CELSR2,FZD2,HHEX,HIC1,LRP5,TLE4,FZD9,APC2,AMOTL2,WLS,ZNRF3,NKD2
10_Member	GO Biological Processes	GO:0198738	cell-cell signaling by wnt	-2.59212	-0.82067	13/255	1500,1952,2535,3087,3090,4041,7091,8326,10297,51421,79971,84133,85409	CTNND1,CELSR2,FZD2,HHEX,HIC1,LRP5,TLE4,FZD9,APC2,AMOTL2,WLS,ZNRF3,NKD2
10_Member	GO Biological Processes	GO:1905114	cell surface receptor signaling pathway involved in cell-cell signaling	-2.56643	-0.804683	15/319	652,1500,1952,2535,3087,3090,4041,6608,7091,8326,10297,51421,79971,84133,85409	BMP4,CTNND1,CELSR2,FZD2,HHEX,HIC1,LRP5,SMO,TLE4,FZD9,APC2,AMOTL2,WLS,ZNRF3,NKD2
10_Member	GO Biological Processes	GO:0060828	regulation of canonical Wnt signaling pathway	-2.50559	-0.757692	13/261	1500,3087,4192,6657,7091,7162,8326,8994,10297,79971,84133,85409,100507050	CTNND1,HHEX,MDK,SOX2,TLE4,TPBG,FZD9,LIMD1,APC2,WLS,ZNRF3,NKD2,TPBGL
11_Summary	Reactome Gene Sets	R-HSA-8939243	RUNX1 interacts with co-factors whose precise effect on RUNX1 targets is not known	-4.96353	-2.81825	7/38	648,1912,6604,8535,23466,28996,84733,1839,2065,2069,2250,3667,5154,5692,5714,7314,8503,26523,27161,10642,148170	BMI1,PHC2,SMARCD3,CBX4,CBX6,HIPK2,CBX2,HBEGF,ERBB3,EREG,FGF5,IRS1,PDGFA,PSMB4,PSMD8,UBB,PIK3R3,AGO1,AGO2,IGF2BP1,CDC42EP5
11_Member	Reactome Gene Sets	R-HSA-8939243	RUNX1 interacts with co-factors whose precise effect on RUNX1 targets is not known	-4.96353	-2.81825	7/38	648,1912,6604,8535,23466,28996,84733	BMI1,PHC2,SMARCD3,CBX4,CBX6,HIPK2,CBX2
11_Member	Reactome Gene Sets	R-HSA-1257604	PIP3 activates AKT signaling	-4.36109	-2.27922	17/267	648,1839,1912,2065,2069,2250,3667,5154,5692,5714,7314,8503,8535,23466,26523,27161,84733	BMI1,HBEGF,PHC2,ERBB3,EREG,FGF5,IRS1,PDGFA,PSMB4,PSMD8,UBB,PIK3R3,CBX4,CBX6,AGO1,AGO2,CBX2
11_Member	CORUM	CORUM:115	Polycomb repressive complex 1 (PRC1, hPRC-H)	-4.11491	-2.06926	4/12	648,1912,8535,84733	BMI1,PHC2,CBX4,CBX2
11_Member	CORUM	CORUM:116	Polycomb repressive complex 1 (PRC1, hPRC-H)	-3.96233	-1.93371	4/13	648,1912,8535,84733	BMI1,PHC2,CBX4,CBX2
11_Member	Reactome Gene Sets	R-HSA-9006925	Intracellular signaling by second messengers	-3.59451	-1.62074	17/309	648,1839,1912,2065,2069,2250,3667,5154,5692,5714,7314,8503,8535,23466,26523,27161,84733	BMI1,HBEGF,PHC2,ERBB3,EREG,FGF5,IRS1,PDGFA,PSMB4,PSMD8,UBB,PIK3R3,CBX4,CBX6,AGO1,AGO2,CBX2
11_Member	Reactome Gene Sets	R-HSA-4655427	SUMOylation of DNA methylation proteins	-3.46847	-1.50739	4/17	648,1912,8535,84733	BMI1,PHC2,CBX4,CBX2
11_Member	Reactome Gene Sets	R-HSA-6807070	PTEN Regulation	-3.18114	-1.27655	10/140	648,1912,5692,5714,7314,8535,23466,26523,27161,84733	BMI1,PHC2,PSMB4,PSMD8,UBB,CBX4,CBX6,AGO1,AGO2,CBX2
11_Member	Reactome Gene Sets	R-HSA-3899300	SUMOylation of transcription cofactors	-2.65015	-0.857345	5/45	648,1912,8535,28996,84733	BMI1,PHC2,CBX4,HIPK2,CBX2
11_Member	Reactome Gene Sets	R-HSA-5687128	MAPK6/MAPK4 signaling	-2.61743	-0.831843	7/89	5692,5714,7314,10642,26523,27161,148170	PSMB4,PSMD8,UBB,IGF2BP1,AGO1,AGO2,CDC42EP5
11_Member	Reactome Gene Sets	R-HSA-8943724	Regulation of PTEN gene transcription	-2.07888	-0.458919	5/61	648,1912,8535,23466,84733	BMI1,PHC2,CBX4,CBX6,CBX2
12_Summary	GO Biological Processes	GO:0001503	ossification	-4.82695	-2.68709	18/271	43,652,656,1969,2303,3021,3726,4041,4322,4488,6608,6657,8326,8994,11173,27044,51025,64131,1081,1907,2069,4192,6909,23769,55083,114789,114798	ACHE,BMP4,BMP8B,EPHA2,FOXC2,H3-3B,JUNB,LRP5,MMP13,MSX2,SMO,SOX2,FZD9,LIMD1,ADAMTS7,SND1,PAM16,XYLT1,CGA,EDN2,EREG,MDK,TBX2,FLRT1,KIF26B,SLC25A25,SLITRK1
12_Member	GO Biological Processes	GO:0001503	ossification	-4.82695	-2.68709	18/271	43,652,656,1969,2303,3021,3726,4041,4322,4488,6608,6657,8326,8994,11173,27044,51025,64131	ACHE,BMP4,BMP8B,EPHA2,FOXC2,H3-3B,JUNB,LRP5,MMP13,MSX2,SMO,SOX2,FZD9,LIMD1,ADAMTS7,SND1,PAM16,XYLT1
12_Member	GO Biological Processes	GO:0001649	osteoblast differentiation	-4.03168	-1.99462	11/132	43,652,1969,3021,3726,4041,4488,6608,6657,8994,27044	ACHE,BMP4,EPHA2,H3-3B,JUNB,LRP5,MSX2,SMO,SOX2,LIMD1,SND1
12_Member	GO Biological Processes	GO:0048589	developmental growth	-2.74058	-0.913822	17/369	652,1081,1907,2069,2303,3021,4192,4322,4488,6608,6657,6909,8326,23769,55083,114789,114798	BMP4,CGA,EDN2,EREG,FOXC2,H3-3B,MDK,MMP13,MSX2,SMO,SOX2,TBX2,FZD9,FLRT1,KIF26B,SLC25A25,SLITRK1
12_Member	GO Biological Processes	GO:0040007	growth	-2.71601	-0.898245	17/371	652,1081,1907,2069,2303,3021,4192,4322,4488,6608,6657,6909,8326,23769,55083,114789,114798	BMP4,CGA,EDN2,EREG,FOXC2,H3-3B,MDK,MMP13,MSX2,SMO,SOX2,TBX2,FZD9,FLRT1,KIF26B,SLC25A25,SLITRK1
13_Summary	Canonical Pathways	M5887	NABA BASEMENT MEMBRANES	-4.80953	-2.67236	7/40	1282,1284,1287,3911,22795,59277,375790,1294,84959,5154,3769,5646,6520,84570,652,2201,4322,8515,55214,8912,3730,5649,64129,64856,4192,1021,8503,9618,2790,4842,399694,5327,894	COL4A1,COL4A2,COL4A5,LAMA5,NID2,NTN4,AGRN,COL7A1,UBASH3B,PDGFA,KCNJ13,PRSS3,SLC3A2,COL25A1,BMP4,FBN2,MMP13,ITGA10,P3H2,CACNA1H,ANOS1,RELN,TINAGL1,VWA1,MDK,CDK6,PIK3R3,TRAF4,GNG10,NOS1,SHC4,PLAT,CCND2
13_Member	Canonical Pathways	M5887	NABA BASEMENT MEMBRANES	-4.80953	-2.67236	7/40	1282,1284,1287,3911,22795,59277,375790	COL4A1,COL4A2,COL4A5,LAMA5,NID2,NTN4,AGRN
13_Member	Reactome Gene Sets	R-HSA-3000157	Laminin interactions	-4.54189	-2.44072	6/30	1282,1284,1287,1294,3911,22795	COL4A1,COL4A2,COL4A5,COL7A1,LAMA5,NID2
13_Member	GO Biological Processes	GO:0038063	collagen-activated tyrosine kinase receptor signaling pathway	-4.11491	-2.06926	4/12	1282,1284,1287,84959	COL4A1,COL4A2,COL4A5,UBASH3B
13_Member	Reactome Gene Sets	R-HSA-2214320	Anchoring fibril formation	-3.69572	-1.70506	4/15	1282,1284,1287,1294	COL4A1,COL4A2,COL4A5,COL7A1
13_Member	Reactome Gene Sets	R-HSA-3000171	Non-integrin membrane-ECM interactions	-3.69346	-1.70471	7/59	1282,1284,1287,3911,5154,59277,375790	COL4A1,COL4A2,COL4A5,LAMA5,PDGFA,NTN4,AGRN
13_Member	GO Biological Processes	GO:0038065	collagen-activated signaling pathway	-3.46847	-1.50739	4/17	1282,1284,1287,84959	COL4A1,COL4A2,COL4A5,UBASH3B
13_Member	KEGG Pathway	hsa04974	Protein digestion and absorption	-2.88287	-1.03449	8/103	1282,1284,1287,1294,3769,5646,6520,84570	COL4A1,COL4A2,COL4A5,COL7A1,KCNJ13,PRSS3,SLC3A2,COL25A1
13_Member	Reactome Gene Sets	R-HSA-1474244	Extracellular matrix organization	-2.80847	-0.969641	15/301	652,1282,1284,1287,1294,2201,3911,4322,5154,8515,22795,55214,59277,84570,375790	BMP4,COL4A1,COL4A2,COL4A5,COL7A1,FBN2,LAMA5,MMP13,PDGFA,ITGA10,NID2,P3H2,NTN4,COL25A1,AGRN
13_Member	Reactome Gene Sets	R-HSA-419037	NCAM1 interactions	-2.78547	-0.949328	5/42	1282,1284,1287,8912,375790	COL4A1,COL4A2,COL4A5,CACNA1H,AGRN
13_Member	Canonical Pathways	M5884	NABA CORE MATRISOME	-2.74354	-0.915373	14/275	1282,1284,1287,1294,2201,3730,3911,5649,22795,59277,64129,64856,84570,375790	COL4A1,COL4A2,COL4A5,COL7A1,FBN2,ANOS1,LAMA5,RELN,NID2,NTN4,TINAGL1,VWA1,COL25A1,AGRN
13_Member	Reactome Gene Sets	R-HSA-1442490	Collagen degradation	-2.69665	-0.887646	6/64	1282,1284,1287,1294,4322,84570	COL4A1,COL4A2,COL4A5,COL7A1,MMP13,COL25A1
13_Member	Canonical Pathways	M3005	NABA COLLAGENS	-2.694	-0.887646	5/44	1282,1284,1287,1294,84570	COL4A1,COL4A2,COL4A5,COL7A1,COL25A1
13_Member	Reactome Gene Sets	R-HSA-8948216	Collagen chain trimerization	-2.694	-0.887646	5/44	1282,1284,1287,1294,84570	COL4A1,COL4A2,COL4A5,COL7A1,COL25A1
13_Member	KEGG Pathway	hsa04512	ECM-receptor interaction	-2.6454	-0.853808	7/88	1282,1284,1287,3911,5649,8515,375790	COL4A1,COL4A2,COL4A5,LAMA5,RELN,ITGA10,AGRN
13_Member	Canonical Pathways	M18	PID INTEGRIN1 PATHWAY	-2.62815	-0.841371	6/66	1282,1287,1294,3911,4192,8515	COL4A1,COL4A5,COL7A1,LAMA5,MDK,ITGA10
13_Member	Reactome Gene Sets	R-HSA-1650814	Collagen biosynthesis and modifying enzymes	-2.59487	-0.821061	6/67	1282,1284,1287,1294,55214,84570	COL4A1,COL4A2,COL4A5,COL7A1,P3H2,COL25A1
13_Member	Reactome Gene Sets	R-HSA-1474290	Collagen formation	-2.58986	-0.82067	7/90	1282,1284,1287,1294,4322,55214,84570	COL4A1,COL4A2,COL4A5,COL7A1,MMP13,P3H2,COL25A1
13_Member	KEGG Pathway	hsa05222	Small cell lung cancer	-2.53593	-0.782528	7/92	1021,1282,1284,1287,3911,8503,9618	CDK6,COL4A1,COL4A2,COL4A5,LAMA5,PIK3R3,TRAF4
13_Member	WikiPathways	WP4658	Small cell lung cancer	-2.38302	-0.671814	7/98	1021,1282,1284,1287,3911,8503,9618	CDK6,COL4A1,COL4A2,COL4A5,LAMA5,PIK3R3,TRAF4
13_Member	KEGG Pathway	hsa04926	Relaxin signaling pathway	-2.27612	-0.592196	8/129	1282,1284,1287,2790,4322,4842,8503,399694	COL4A1,COL4A2,COL4A5,GNG10,MMP13,NOS1,PIK3R3,SHC4
13_Member	Reactome Gene Sets	R-HSA-2243919	Crosslinking of collagen fibrils	-2.25159	-0.574218	3/18	1282,1284,1287	COL4A1,COL4A2,COL4A5
13_Member	Reactome Gene Sets	R-HSA-186797	Signaling by PDGF	-2.17056	-0.519357	5/58	1282,1284,1287,5154,5327	COL4A1,COL4A2,COL4A5,PDGFA,PLAT
13_Member	Reactome Gene Sets	R-HSA-216083	Integrin cell surface interactions	-2.08704	-0.460677	6/85	1282,1284,1287,1294,8515,375790	COL4A1,COL4A2,COL4A5,COL7A1,ITGA10,AGRN
13_Member	Reactome Gene Sets	R-HSA-2022090	Assembly of collagen fibrils and other multimeric structures	-2.07888	-0.458919	5/61	1282,1284,1287,1294,4322	COL4A1,COL4A2,COL4A5,COL7A1,MMP13
13_Member	Reactome Gene Sets	R-HSA-1474228	Degradation of the extracellular matrix	-2.06832	-0.450803	8/140	1282,1284,1287,1294,2201,3911,4322,84570	COL4A1,COL4A2,COL4A5,COL7A1,FBN2,LAMA5,MMP13,COL25A1
13_Member	KEGG Pathway	hsa04510	Focal adhesion	-2.0449	-0.444066	10/201	894,1282,1284,1287,3911,5154,5649,8503,8515,399694	CCND2,COL4A1,COL4A2,COL4A5,LAMA5,PDGFA,RELN,PIK3R3,ITGA10,SHC4
13_Member	Reactome Gene Sets	R-HSA-375165	NCAM signaling for neurite out-growth	-2.0209	-0.421624	5/63	1282,1284,1287,8912,375790	COL4A1,COL4A2,COL4A5,CACNA1H,AGRN
14_Summary	GO Biological Processes	GO:0070493	thrombin-activated receptor signaling pathway	-4.68777	-2.56897	4/9	2149,2150,2151,10788,4803,4914,5649,10125,1465,1839,2065,2069,4192,4217,4488,5154,5327,6657,8527,23098,83481,84959,393,5924,23108,23370,23616,55200,84144,3814,2303	F2R,F2RL1,F2RL2,IQGAP2,NGF,NTRK1,RELN,RASGRP1,CSRP1,HBEGF,ERBB3,EREG,MDK,MAP3K5,MSX2,PDGFA,PLAT,SOX2,DGKD,SARM1,EPPK1,UBASH3B,ARHGAP4,RASGRF2,RAP1GAP2,ARHGEF18,SH3BP1,PLEKHG6,SYDE2,KISS1,FOXC2
14_Member	GO Biological Processes	GO:0070493	thrombin-activated receptor signaling pathway	-4.68777	-2.56897	4/9	2149,2150,2151,10788	F2R,F2RL1,F2RL2,IQGAP2
14_Member	GO Biological Processes	GO:0051057	positive regulation of small GTPase mediated signal transduction	-3.23199	-1.31344	7/70	2149,2150,2151,4803,4914,5649,10125	F2R,F2RL1,F2RL2,NGF,NTRK1,RELN,RASGRP1
14_Member	GO Biological Processes	GO:0046579	positive regulation of Ras protein signal transduction	-2.76791	-0.934441	6/62	2149,2150,2151,4803,4914,10125	F2R,F2RL1,F2RL2,NGF,NTRK1,RASGRP1
14_Member	GO Biological Processes	GO:0009611	response to wounding	-2.42296	-0.69745	18/430	1465,1839,2065,2069,2149,2150,2151,4192,4217,4488,4914,5154,5327,6657,8527,23098,83481,84959	CSRP1,HBEGF,ERBB3,EREG,F2R,F2RL1,F2RL2,MDK,MAP3K5,MSX2,NTRK1,PDGFA,PLAT,SOX2,DGKD,SARM1,EPPK1,UBASH3B
14_Member	GO Biological Processes	GO:0051056	regulation of small GTPase mediated signal transduction	-2.41549	-0.691022	14/299	393,2149,2150,2151,4803,4914,5649,5924,10125,23108,23370,23616,55200,84144	ARHGAP4,F2R,F2RL1,F2RL2,NGF,NTRK1,RELN,RASGRF2,RASGRP1,RAP1GAP2,ARHGEF18,SH3BP1,PLEKHG6,SYDE2
14_Member	GO Biological Processes	GO:0051482	positive regulation of cytosolic calcium ion concentration involved in phospholipase C-activating G protein-coupled signaling pathway	-2.39507	-0.682776	4/32	2149,2150,2151,3814	F2R,F2RL1,F2RL2,KISS1
14_Member	GO Biological Processes	GO:0014068	positive regulation of phosphatidylinositol 3-kinase signaling	-2.23938	-0.563868	6/79	2065,2149,2150,4914,5154,5649	ERBB3,F2R,F2RL1,NTRK1,PDGFA,RELN
14_Member	GO Biological Processes	GO:0061041	regulation of wound healing	-2.19773	-0.535814	8/133	1839,2149,2150,2303,5154,5327,83481,84959	HBEGF,F2R,F2RL1,FOXC2,PDGFA,PLAT,EPPK1,UBASH3B
14_Member	GO Biological Processes	GO:1903034	regulation of response to wounding	-2.11929	-0.483572	9/166	1839,2149,2150,2303,4192,5154,5327,83481,84959	HBEGF,F2R,F2RL1,FOXC2,MDK,PDGFA,PLAT,EPPK1,UBASH3B
14_Member	GO Biological Processes	GO:0042060	wound healing	-2.09445	-0.464606	14/326	1465,1839,2065,2069,2149,2150,2151,4217,4488,5154,5327,8527,83481,84959	CSRP1,HBEGF,ERBB3,EREG,F2R,F2RL1,F2RL2,MAP3K5,MSX2,PDGFA,PLAT,DGKD,EPPK1,UBASH3B
14_Member	GO Biological Processes	GO:0014066	regulation of phosphatidylinositol 3-kinase signaling	-2.09124	-0.462519	7/111	2065,2149,2150,4914,5154,5649,10125	ERBB3,F2R,F2RL1,NTRK1,PDGFA,RELN,RASGRP1
15_Summary	GO Biological Processes	GO:0001775	cell activation	-4.58001	-2.47388	30/636	1021,1465,1880,1907,2149,2150,2151,3087,3576,3589,3714,3718,4192,4914,5154,5327,5734,6404,6608,8326,8527,9759,10125,10148,22918,27040,27086,55509,55619,84959,648,652,1969,2304,2539,3726,4041,9258,10234,28996,51218,64783,168002,219790	CDK6,CSRP1,GPR183,EDN2,F2R,F2RL1,F2RL2,HHEX,CXCL8,IL11,JAG2,JAK3,MDK,NTRK1,PDGFA,PLAT,PTGER4,SELPLG,SMO,FZD9,DGKD,HDAC4,RASGRP1,EBI3,CD93,LAT,FOXP1,BATF3,DOCK10,UBASH3B,BMI1,BMP4,EPHA2,FOXE1,G6PD,JUNB,LRP5,MFHAS1,LRRC17,HIPK2,GLRX5,RBM15,DACT2,RTKN2
15_Member	GO Biological Processes	GO:0001775	cell activation	-4.58001	-2.47388	30/636	1021,1465,1880,1907,2149,2150,2151,3087,3576,3589,3714,3718,4192,4914,5154,5327,5734,6404,6608,8326,8527,9759,10125,10148,22918,27040,27086,55509,55619,84959	CDK6,CSRP1,GPR183,EDN2,F2R,F2RL1,F2RL2,HHEX,CXCL8,IL11,JAG2,JAK3,MDK,NTRK1,PDGFA,PLAT,PTGER4,SELPLG,SMO,FZD9,DGKD,HDAC4,RASGRP1,EBI3,CD93,LAT,FOXP1,BATF3,DOCK10,UBASH3B
15_Member	GO Biological Processes	GO:0048534	hematopoietic or lymphoid organ development	-4.10354	-2.06005	29/643	648,652,1021,1880,1969,2150,2304,2539,3087,3589,3714,3718,3726,4041,4914,5734,6404,8326,9258,9759,10234,27086,28996,51218,55509,55619,64783,168002,219790	BMI1,BMP4,CDK6,GPR183,EPHA2,F2RL1,FOXE1,G6PD,HHEX,IL11,JAG2,JAK3,JUNB,LRP5,NTRK1,PTGER4,SELPLG,FZD9,MFHAS1,HDAC4,LRRC17,FOXP1,HIPK2,GLRX5,BATF3,DOCK10,RBM15,DACT2,RTKN2
15_Member	GO Biological Processes	GO:0002520	immune system development	-3.65882	-1.67197	29/683	648,652,1021,1880,1969,2150,2304,2539,3087,3589,3714,3718,3726,4041,4914,5734,6404,8326,9258,9759,10234,27086,28996,51218,55509,55619,64783,168002,219790	BMI1,BMP4,CDK6,GPR183,EPHA2,F2RL1,FOXE1,G6PD,HHEX,IL11,JAG2,JAK3,JUNB,LRP5,NTRK1,PTGER4,SELPLG,FZD9,MFHAS1,HDAC4,LRRC17,FOXP1,HIPK2,GLRX5,BATF3,DOCK10,RBM15,DACT2,RTKN2
15_Member	GO Biological Processes	GO:0030097	hemopoiesis	-3.17968	-1.27655	25/594	648,652,1021,1880,1969,2150,2539,3087,3589,3714,3718,3726,4914,5734,6404,8326,9258,9759,27086,28996,51218,55509,55619,168002,219790	BMI1,BMP4,CDK6,GPR183,EPHA2,F2RL1,G6PD,HHEX,IL11,JAG2,JAK3,JUNB,NTRK1,PTGER4,SELPLG,FZD9,MFHAS1,HDAC4,FOXP1,HIPK2,GLRX5,BATF3,DOCK10,DACT2,RTKN2
15_Member	GO Biological Processes	GO:0045321	leukocyte activation	-2.94859	-1.08905	22/515	1021,1880,1907,2150,3087,3576,3589,3714,3718,4192,4914,5734,6404,8326,9759,10125,10148,22918,27040,27086,55509,55619	CDK6,GPR183,EDN2,F2RL1,HHEX,CXCL8,IL11,JAG2,JAK3,MDK,NTRK1,PTGER4,SELPLG,FZD9,HDAC4,RASGRP1,EBI3,CD93,LAT,FOXP1,BATF3,DOCK10
15_Member	GO Biological Processes	GO:1903131	mononuclear cell differentiation	-2.93836	-1.08164	15/292	652,1021,1880,2150,3087,3589,3714,3718,4914,5734,8326,9759,27086,55509,55619	BMP4,CDK6,GPR183,F2RL1,HHEX,IL11,JAG2,JAK3,NTRK1,PTGER4,FZD9,HDAC4,FOXP1,BATF3,DOCK10
15_Member	GO Biological Processes	GO:0002521	leukocyte differentiation	-2.91894	-1.06502	17/355	652,1021,1880,1969,2150,3087,3589,3714,3718,3726,4914,5734,8326,9759,27086,55509,55619	BMP4,CDK6,GPR183,EPHA2,F2RL1,HHEX,IL11,JAG2,JAK3,JUNB,NTRK1,PTGER4,FZD9,HDAC4,FOXP1,BATF3,DOCK10
15_Member	GO Biological Processes	GO:0030183	B cell differentiation	-2.55631	-0.798509	8/116	1880,3087,3589,3718,4914,8326,9759,55619	GPR183,HHEX,IL11,JAK3,NTRK1,FZD9,HDAC4,DOCK10
15_Member	GO Biological Processes	GO:0030099	myeloid cell differentiation	-2.49986	-0.75518	12/231	652,1880,1969,2150,2539,3589,3718,3726,9258,27086,28996,55509	BMP4,GPR183,EPHA2,F2RL1,G6PD,IL11,JAK3,JUNB,MFHAS1,FOXP1,HIPK2,BATF3
15_Member	GO Biological Processes	GO:0046649	lymphocyte activation	-2.30938	-0.614938	17/407	1021,1880,2150,3087,3589,3714,3718,4192,4914,5734,8326,9759,10125,10148,27040,27086,55619	CDK6,GPR183,F2RL1,HHEX,IL11,JAG2,JAK3,MDK,NTRK1,PTGER4,FZD9,HDAC4,RASGRP1,EBI3,LAT,FOXP1,DOCK10
15_Member	GO Biological Processes	GO:0030098	lymphocyte differentiation	-2.17592	-0.519357	12/254	1021,1880,3087,3589,3714,3718,4914,5734,8326,9759,27086,55619	CDK6,GPR183,HHEX,IL11,JAG2,JAK3,NTRK1,PTGER4,FZD9,HDAC4,FOXP1,DOCK10
15_Member	GO Biological Processes	GO:0042113	B cell activation	-2.10297	-0.471447	9/167	1880,3087,3589,3718,4914,8326,9759,10125,55619	GPR183,HHEX,IL11,JAK3,NTRK1,FZD9,HDAC4,RASGRP1,DOCK10
16_Summary	Reactome Gene Sets	R-HSA-5683057	MAPK family signaling cascades	-4.29564	-2.22594	19/325	1741,1742,1839,2065,2069,2250,3667,3718,5154,5692,5714,5924,7314,10125,10642,26523,27040,27161,148170,652,656,894,3589,3976,4217,4803,4842,4914,5649,8091,8503,9518,9618,9966,28996,65267,1969,2044,2050,1029,3087,4041,5997,9021,84959,648,256987,8912,55799,59283,2790,399694	DLG3,DLG4,HBEGF,ERBB3,EREG,FGF5,IRS1,JAK3,PDGFA,PSMB4,PSMD8,RASGRF2,UBB,RASGRP1,IGF2BP1,AGO1,LAT,AGO2,CDC42EP5,BMP4,BMP8B,CCND2,IL11,LIF,MAP3K5,NGF,NOS1,NTRK1,RELN,HMGA2,PIK3R3,GDF15,TRAF4,TNFSF15,HIPK2,WNK3,EPHA2,EPHA5,EPHB4,CDKN2A,HHEX,LRP5,RGS2,SOCS3,UBASH3B,BMI1,SERINC5,CACNA1H,CACNA2D3,CACNG8,GNG10,SHC4
16_Member	Reactome Gene Sets	R-HSA-5683057	MAPK family signaling cascades	-4.29564	-2.22594	19/325	1741,1742,1839,2065,2069,2250,3667,3718,5154,5692,5714,5924,7314,10125,10642,26523,27040,27161,148170	DLG3,DLG4,HBEGF,ERBB3,EREG,FGF5,IRS1,JAK3,PDGFA,PSMB4,PSMD8,RASGRF2,UBB,RASGRP1,IGF2BP1,AGO1,LAT,AGO2,CDC42EP5
16_Member	Reactome Gene Sets	R-HSA-5673001	RAF/MAP kinase cascade	-3.12163	-1.22826	15/280	1741,1742,1839,2065,2069,2250,3667,3718,5154,5692,5714,5924,7314,10125,27040	DLG3,DLG4,HBEGF,ERBB3,EREG,FGF5,IRS1,JAK3,PDGFA,PSMB4,PSMD8,RASGRF2,UBB,RASGRP1,LAT
16_Member	Reactome Gene Sets	R-HSA-5684996	MAPK1/MAPK3 signaling	-3.02851	-1.15017	15/286	1741,1742,1839,2065,2069,2250,3667,3718,5154,5692,5714,5924,7314,10125,27040	DLG3,DLG4,HBEGF,ERBB3,EREG,FGF5,IRS1,JAK3,PDGFA,PSMB4,PSMD8,RASGRF2,UBB,RASGRP1,LAT
16_Member	GO Biological Processes	GO:0001934	positive regulation of protein phosphorylation	-2.34869	-0.643479	26/722	652,656,894,1741,1742,1839,2065,2069,2250,3589,3976,4217,4803,4842,4914,5154,5649,8091,8503,9518,9618,9966,10125,27040,28996,65267	BMP4,BMP8B,CCND2,DLG3,DLG4,HBEGF,ERBB3,EREG,FGF5,IL11,LIF,MAP3K5,NGF,NOS1,NTRK1,PDGFA,RELN,HMGA2,PIK3R3,GDF15,TRAF4,TNFSF15,RASGRP1,LAT,HIPK2,WNK3
16_Member	GO Biological Processes	GO:0033674	positive regulation of kinase activity	-2.33529	-0.636966	19/473	894,1741,1742,1839,1969,2044,2050,2065,2069,3667,4217,4914,5154,5649,8091,9618,9966,10125,27040	CCND2,DLG3,DLG4,HBEGF,EPHA2,EPHA5,EPHB4,ERBB3,EREG,IRS1,MAP3K5,NTRK1,PDGFA,RELN,HMGA2,TRAF4,TNFSF15,RASGRP1,LAT
16_Member	GO Biological Processes	GO:0043549	regulation of kinase activity	-2.31819	-0.622785	27/763	652,894,1029,1741,1742,1839,1969,2044,2050,2065,2069,3087,3667,4041,4217,4914,5154,5649,5997,8091,8503,9021,9618,9966,10125,27040,84959	BMP4,CCND2,CDKN2A,DLG3,DLG4,HBEGF,EPHA2,EPHA5,EPHB4,ERBB3,EREG,HHEX,IRS1,LRP5,MAP3K5,NTRK1,PDGFA,RELN,RGS2,HMGA2,PIK3R3,SOCS3,TRAF4,TNFSF15,RASGRP1,LAT,UBASH3B
16_Member	GO Biological Processes	GO:0051347	positive regulation of transferase activity	-2.1964	-0.53546	21/559	648,894,1741,1742,1839,1969,2044,2050,2065,2069,3667,4217,4914,5154,5649,8091,9618,9966,10125,27040,256987	BMI1,CCND2,DLG3,DLG4,HBEGF,EPHA2,EPHA5,EPHB4,ERBB3,EREG,IRS1,MAP3K5,NTRK1,PDGFA,RELN,HMGA2,TRAF4,TNFSF15,RASGRP1,LAT,SERINC5
16_Member	KEGG Pathway	hsa04010	MAPK signaling pathway	-2.08117	-0.458919	13/294	1969,2065,2069,2250,4217,4803,4914,5154,5924,8912,10125,55799,59283	EPHA2,ERBB3,EREG,FGF5,MAP3K5,NGF,NTRK1,PDGFA,RASGRF2,CACNA1H,RASGRP1,CACNA2D3,CACNG8
16_Member	KEGG Pathway	hsa04014	Ras signaling pathway	-2.04863	-0.444337	11/232	1969,2250,2790,4803,4914,5154,5924,8503,10125,27040,399694	EPHA2,FGF5,GNG10,NGF,NTRK1,PDGFA,RASGRF2,PIK3R3,RASGRP1,LAT,SHC4
17_Summary	WikiPathways	WP2839	Hair follicle development: organogenesis - part 2 of 3	-4.29387	-2.22594	6/33	652,894,3911,4041,5154,6608,3976,4192,6909,27086,59277,53335,55083,1021,5455,3714,4488,6331	BMP4,CCND2,LAMA5,LRP5,PDGFA,SMO,LIF,MDK,TBX2,FOXP1,NTN4,BCL11A,KIF26B,CDK6,POU3F3,JAG2,MSX2,SCN5A
17_Member	WikiPathways	WP2839	Hair follicle development: organogenesis - part 2 of 3	-4.29387	-2.22594	6/33	652,894,3911,4041,5154,6608	BMP4,CCND2,LAMA5,LRP5,PDGFA,SMO
17_Member	GO Biological Processes	GO:1905330	regulation of morphogenesis of an epithelium	-4.26074	-2.19509	8/65	652,3976,4192,5154,6608,6909,27086,59277	BMP4,LIF,MDK,PDGFA,SMO,TBX2,FOXP1,NTN4
17_Member	GO Biological Processes	GO:0060684	epithelial-mesenchymal cell signaling	-3.78237	-1.77613	3/6	652,5154,6608	BMP4,PDGFA,SMO
17_Member	GO Biological Processes	GO:0060688	regulation of morphogenesis of a branching structure	-3.21858	-1.30165	6/51	652,4192,5154,6608,53335,59277	BMP4,MDK,PDGFA,SMO,BCL11A,NTN4
[truncated: 35 more rows]
