# Supplementary material for: Transcriptional profiling of Hutchinson-Gilford Progeria syndrome fibroblasts reveals deficits in mesenchymal stem cell commitment to differentiation related to early events in endochondral ossification
Source: eLife journal article supplement (doi:10.7554/elife.81290), 2022-12-29
Supplement: table2-data1 [file metascape_result.xlsx]

## Sheet: Annotation
MyList	Gene ID	Type	Tax ID	Homologene Gene ID	Homologene Gene Tax ID	Gene Symbol	Description	Biological Process (GO)	Kinase Class (UniProt)	Protein Function (Protein Atlas)	Subcellular Location (Protein Atlas)	Drug (DrugBank)	Canonical Pathways	Hallmark Gene Sets	GO:0001503 ossification	GO:0051046 regulation of secretion	GO:0055074 calcium ion homeostasis	GO:0048568 embryonic organ development	GO:2000147 positive regulation of cell mo	GO:0110053 regulation of actin filament o	GO:0045446 endothelial cell differentiati	GO:0010721 negative regulation of cell de	R-HSA-1474244 Extracellular matrix organizat	GO:0051345 positive regulation of hydrola	GO:0010718 positive regulation of epithel	GO:0001525 angiogenesis	GO:0001649 osteoblast differentiation	GO:0046942 carboxylic acid transport	GO:0008277 regulation of G protein-couple	GO:0090305 nucleic acid phosphodiester bo	WP4754 IL-18 signaling pathway	GO:0006140 regulation of nucleotide metab	hsa04360 Axon guidance	GO:0051302 regulation of cell division
CYP24A1	1591	symbol	H. sapiens	1591	H. sapiens	CYP24A1	cytochrome P450 family 24 subfamily A member 1	GO:0070561 vitamin D receptor signaling pathway;GO:0042369 vitamin D catabolic process;GO:0010430 fatty acid omega-oxidation		ENZYME proteins:Oxidoreductases; Disease related genes; Potential drug targets; Enzymes; Predicted intracellular proteins; Human disease related genes:Congenital disorders of metabolism:Other congenital disorders of metabolism	Mitochondria;Nucleoplasm (Approved); Additional: Plasma membrane	CTA018			1	1	0	0	0	0	0	0	0	0	0	0	1	0	0	0	0	0	0	0
ADD2	119	symbol	H. sapiens	119	H. sapiens	ADD2	adducin 2	GO:0051016 barbed-end actin filament capping;GO:0050901 leukocyte tethering or rolling;GO:0061756 leukocyte adhesion to vascular endothelial cell		Predicted intracellular proteins	Cytosol;Nucleoplasm (Approved); Additional: Plasma membrane			(M5945)HALLMARK HEME METABOLISM	0	0	0	0	0	1	1	0	0	0	0	0	0	0	0	0	0	0	0	0
TGFB3	7043	symbol	H. sapiens	7043	H. sapiens	TGFB3	transforming growth factor beta 3	GO:0070483 detection of hypoxia;GO:0042704 uterine wall breakdown;GO:0060364 frontal suture morphogenesis		Cancer-related genes:Candidate cancer biomarkers; Human disease related genes:Immune system diseases:Allergies and autoimmune diseases; Human disease related genes:Congenital malformations:Congenital malformations of the circulatory system; Predicted secreted proteins; Human disease related genes:Congenital malformations:Other congenital malformations; Human disease related genes:Musculoskeletal …	Vesicles (Approved)	1,4-Dioxane	(M185)PID ALK1 PATHWAY; (M33)PID GLYPICAN 1PATHWAY; (M286)PID TGFBR PATHWAY	(M5891)HALLMARK HYPOXIA	1	1	0	1	1	1	0	0	1	0	1	0	0	0	0	0	0	0	0	1
NKD1	85407	symbol	H. sapiens	85407	H. sapiens	NKD1	NKD inhibitor of WNT signaling pathway 1	GO:1901229 regulation of non-canonical Wnt signaling pathway via JNK cascade;GO:1901231 positive regulation of non-canonical Wnt signaling pathway via JNK cascade;GO:1901232 regulation of convergent extension involved in axis elongation		Predicted intracellular proteins	Nucleoli fibrillar center (Approved)		(M70)PID PS1 PATHWAY; (M5493)WNT SIGNALING	(M5895)HALLMARK WNT BETA CATENIN SIGNALING	0	0	0	0	0	0	0	0	0	0	0	0	0	0	0	0	0	1	0	0
DOK6	220164	symbol	H. sapiens	220164	H. sapiens	DOK6	docking protein 6	GO:0007169 transmembrane receptor protein tyrosine kinase signaling pathway;GO:0043410 positive regulation of MAPK cascade;GO:0007167 enzyme linked receptor protein signaling pathway		Predicted intracellular proteins	Cytosol;Focal adhesion sites (Approved)		(M82)PID RET PATHWAY		0	0	0	0	1	0	0	0	0	0	0	0	0	0	0	0	0	0	0	0
RNF144A	9781	symbol	H. sapiens	9781	H. sapiens	RNF144A	ring finger protein 144A	GO:0032436 positive regulation of proteasomal ubiquitin-dependent protein catabolic process;GO:2000060 positive regulation of ubiquitin-dependent protein catabolic process;GO:1901800 positive regulation of proteasomal protein catabolic process		Enzymes; Predicted intracellular proteins; ENZYME proteins:Transferases	Vesicles (Supported)				0	0	0	0	0	0	0	0	0	0	0	0	0	0	0	0	1	1	0	0
TSPAN11	441631	symbol	H. sapiens	441631	H. sapiens	TSPAN11	tetraspanin 11	GO:0016477 cell migration;GO:0048870 cell motility;GO:0051674 localization of cell			Vesicles (Approved)				0	0	0	0	0	0	0	0	0	0	0	0	0	0	0	0	0	0	0	0
NKX3-1	4824	symbol	H. sapiens	4824	H. sapiens	NKX3-1	NK3 homeobox 1	GO:2000834 regulation of androgen secretion;GO:2000836 positive regulation of androgen secretion;GO:0060770 negative regulation of epithelial cell proliferation involved in prostate gland development		Transcription factors:Helix-turn-helix domains; Human disease related genes:Cancers:Cancers of male genital organs; Predicted intracellular proteins; Cancer-related genes:Candidate cancer biomarkers	Nucleoplasm (Supported); Additional: Cytosol		(M285)PID HNF3A PATHWAY; (M58)PID AR PATHWAY	(M5908)HALLMARK ANDROGEN RESPONSE	1	1	0	0	0	0	0	0	0	1	0	1	0	0	0	0	1	0	0	1
IL13RA2	3598	symbol	H. sapiens	3598	H. sapiens	IL13RA2	interleukin 13 receptor subunit alpha 2	GO:0043305 negative regulation of mast cell degranulation;GO:0033007 negative regulation of mast cell activation involved in immune response;GO:0002638 negative regulation of immunoglobulin production		CD markers; Cancer-related genes:Candidate cancer biomarkers	Cell Junctions;Plasma membrane (Approved); Additional: Nucleoplasm;Vesicles	AER001	(M28)PID IL4 2PATHWAY	(M5951)HALLMARK SPERMATOGENESIS	0	1	0	0	0	0	0	0	0	0	0	0	0	0	0	0	0	0	0	0
CLGN	1047	symbol	H. sapiens	1047	H. sapiens	CLGN	calmegin	GO:0007339 binding of sperm to zona pellucida;GO:0035036 sperm-egg recognition;GO:0009988 cell-cell recognition		Predicted intracellular proteins	Endoplasmic reticulum (Supported)			(M5951)HALLMARK SPERMATOGENESIS	0	0	0	0	0	0	0	0	0	0	0	0	0	0	0	0	0	0	0	0
STC1	6781	symbol	H. sapiens	6781	H. sapiens	STC1	stanniocalcin 1	GO:0003421 growth plate cartilage axis specification;GO:1903402 regulation of renal phosphate excretion;GO:1903403 negative regulation of renal phosphate excretion		Predicted secreted proteins; Predicted intracellular proteins				(M5944)HALLMARK ANGIOGENESIS; (M5891)HALLMARK HYPOXIA; (M5924)HALLMARK MTORC1 SIGNALING	1	1	1	0	0	1	1	0	0	0	0	0	0	0	0	0	0	0	0	0
LINC00152	112597	gene_synonym	H. sapiens	112597	H. sapiens	CYTOR	cytoskeleton regulator RNA								0	0	0	0	0	0	0	0	0	0	0	0	0	0	0	0	0	0	0	0
RGS16	6004	symbol	H. sapiens	6004	H. sapiens	RGS16	regulator of G protein signaling 16	GO:0008277 regulation of G protein-coupled receptor signaling pathway;GO:0007601 visual perception;GO:0050953 sensory perception of light stimulus		Predicted intracellular proteins	Cytosol (Approved)			(M5947)HALLMARK IL2 STAT5 SIGNALING; (M5932)HALLMARK INFLAMMATORY RESPONSE; (M5939)HALLMARK P53 PATHWAY	0	0	0	0	0	0	0	0	0	1	0	0	0	0	1	0	1	0	0	0
BMF	90427	symbol	H. sapiens	90427	H. sapiens	BMF	Bcl2 modifying factor	GO:0043276 anoikis;GO:0090200 positive regulation of release of cytochrome c from mitochondria;GO:0090199 regulation of release of cytochrome c from mitochondria		Predicted intracellular proteins	Nucleoplasm (Approved)			(M5902)HALLMARK APOPTOSIS	0	0	0	0	1	1	0	0	0	0	0	0	0	0	0	0	0	0	0	0
MIR4697HG	22997	gene_synonym	H. sapiens	22997	H. sapiens	IGSF9B	immunoglobulin superfamily member 9B	GO:0007155 cell adhesion;GO:0022610 biological adhesion;GO:0007399 nervous system development		Predicted intracellular proteins	Cell Junctions;Golgi apparatus (Approved)				0	0	0	0	0	0	0	0	0	0	0	0	0	0	0	0	0	0	0	0
ADGRA3	166647	symbol	H. sapiens	166647	H. sapiens	ADGRA3	adhesion G protein-coupled receptor A3	GO:0007186 G protein-coupled receptor signaling pathway;GO:0007166 cell surface receptor signaling pathway;GO:0007165 signal transduction		G-protein coupled receptors:GPCRs excl olfactory receptors; Predicted intracellular proteins; G-protein coupled receptors:Family 2 (B) receptors					0	0	0	0	0	0	0	0	0	0	0	0	0	0	0	0	0	0	0	0
SAT1	6303	symbol	H. sapiens	6303	H. sapiens	SAT1	spermidine/spermine N1-acetyltransferase 1	GO:0009447 putrescine catabolic process;GO:0032917 polyamine acetylation;GO:0032918 spermidine acetylation		Human disease related genes:Congenital malformations:Congenital malformations of skin; Disease related genes; Potential drug targets; Enzymes; Predicted intracellular proteins; ENZYME proteins:Transferases		N-ethyl-N-[3-(propylamino)propyl]propane-1,3-diamine	(M118)PID INTEGRIN A9B1 PATHWAY	(M5908)HALLMARK ANDROGEN RESPONSE; (M5902)HALLMARK APOPTOSIS; (M5890)HALLMARK TNFA SIGNALING VIA NFKB	0	0	0	0	0	0	0	0	0	0	0	1	0	0	0	0	0	0	0	0
C1QTNF3	114899	symbol	H. sapiens	114899	H. sapiens	C1QTNF3	C1q and TNF related 3	GO:0070165 positive regulation of adiponectin secretion;GO:0071638 negative regulation of monocyte chemotactic protein-1 production;GO:0070163 regulation of adiponectin secretion		Predicted secreted proteins	Golgi apparatus (Approved)		(M5880)NABA ECM AFFILIATED; (M5885)NABA MATRISOME ASSOCIATED; (M5889)NABA MATRISOME		0	1	1	0	0	0	0	0	1	0	0	0	0	0	0	0	0	0	0	0
SNAI1	6615	symbol	H. sapiens	6615	H. sapiens	SNAI1	snail family transcriptional repressor 1	GO:0060806 negative regulation of cell differentiation involved in embryonic placenta development;GO:0060800 regulation of cell differentiation involved in embryonic placenta development;GO:0010957 negative regulation of vitamin D biosynthetic process		Predicted intracellular proteins; Transcription factors:Zinc-coordinating DNA-binding domains	Nucleoplasm (Supported)		(M71)PID ILK PATHWAY; (M48)PID MET PATHWAY; (M66)PID MYC ACTIV PATHWAY		1	1	0	1	1	0	0	1	0	0	1	0	1	0	0	0	0	0	0	0
ADTRP	84830	symbol	H. sapiens	84830	H. sapiens	ADTRP	androgen dependent TFPI regulating protein	GO:0003332 negative regulation of extracellular matrix constituent secretion;GO:0042758 long-chain fatty acid catabolic process;GO:0003330 regulation of extracellular matrix constituent secretion			Nucleoli (Uncertain)				0	1	0	0	0	1	0	0	0	0	0	1	0	0	0	0	0	0	0	0
SPTB	6710	symbol	H. sapiens	6710	H. sapiens	SPTB	spectrin beta, erythrocytic	GO:0051693 actin filament capping;GO:0030835 negative regulation of actin filament depolymerization;GO:0030834 regulation of actin filament depolymerization		Human disease related genes:Cardiovascular diseases:Hematologic diseases; Predicted intracellular proteins; Disease related genes	Cytosol (Approved)			(M5945)HALLMARK HEME METABOLISM	0	0	0	0	0	1	0	0	0	0	0	0	0	0	0	0	0	0	0	0
TSHZ1	10194	symbol	H. sapiens	10194	H. sapiens	TSHZ1	teashirt zinc finger homeobox 1	GO:0060023 soft palate development;GO:0042474 middle ear morphogenesis;GO:0062009 secondary palate development		Transcription factors:Helix-turn-helix domains; Human disease related genes:Congenital malformations:Congenital malformations of ear; Predicted intracellular proteins; Disease related genes	Nucleoplasm (Approved)				1	0	0	1	0	0	0	0	0	0	1	0	0	0	0	0	1	0	0	0
AKR1C1	1645	symbol	H. sapiens	1645	H. sapiens	AKR1C1	aldo-keto reductase family 1 member C1	GO:0009753 response to jasmonic acid;GO:0071395 cellular response to jasmonic acid stimulus;GO:0044597 daunorubicin metabolic process		Enzymes; Predicted intracellular proteins; ENZYME proteins:Oxidoreductases	Cytosol;Endoplasmic reticulum (Enhanced)	NADH; Salicylic acid; Acetylsalicylic acid; Nicotinamide adenine dinucleotide phosphate; Naringenin; 2-HYDROXY-3,5-DIIODOBENZOIC ACID; Epitestosterone; Hexestrol			0	1	0	0	0	0	1	1	0	0	0	0	0	1	0	0	0	0	0	0
DIRAS3	9077	symbol	H. sapiens	9077	H. sapiens	DIRAS3	DIRAS family GTPase 3	GO:0006349 regulation of gene expression by genetic imprinting;GO:0071514 genetic imprinting;GO:0000079 regulation of cyclin-dependent protein serine/threonine kinase activity		Predicted intracellular proteins	Cytosol;Nuclear membrane (Approved)				0	0	0	0	0	0	0	0	0	0	0	0	0	0	0	0	0	0	0	0
C1orf109	54955	symbol	H. sapiens	54955	H. sapiens	C1orf109	chromosome 1 open reading frame 109			Predicted intracellular proteins	Cytosol (Supported); Additional: Nucleoli;Nucleoplasm				0	0	0	0	0	0	0	0	0	0	0	0	0	0	0	0	0	0	0	0
RASL11B	65997	symbol	H. sapiens	65997	H. sapiens	RASL11B	RAS like family 11 member B	GO:0030512 negative regulation of transforming growth factor beta receptor signaling pathway;GO:0017015 regulation of transforming growth factor beta receptor signaling pathway;GO:1903844 regulation of cellular response to transforming growth factor beta stimulus		Enzymes; ENZYME proteins:Hydrolases; Predicted intracellular proteins	Nuclear bodies (Approved)				0	0	0	0	0	0	0	0	0	0	0	0	0	0	0	0	0	0	0	0
GPER1	2852	symbol	H. sapiens	2852	H. sapiens	GPER1	G protein-coupled estrogen receptor 1	GO:0030264 nuclear fragmentation involved in apoptotic nuclear change;GO:2000724 positive regulation of cardiac vascular smooth muscle cell differentiation;GO:0030263 apoptotic chromosome condensation		G-protein coupled receptors:GPCRs excl olfactory receptors; Transporters; Predicted intracellular proteins	Nucleoli (Approved); Additional: Cytosol;Nucleoplasm;Vesicles	Estradiol; Genistein; MK-0354; Estradiol acetate; Estradiol benzoate; Estradiol cypionate; Estradiol dienanthate; Estradiol valerate		(M5907)HALLMARK ESTROGEN RESPONSE LATE	0	1	1	0	1	1	0	1	0	1	0	0	0	0	1	0	1	0	0	0
HS3ST2	9956	symbol	H. sapiens	9956	H. sapiens	HS3ST2	heparan sulfate-glucosamine 3-sulfotransferase 2	GO:0006024 glycosaminoglycan biosynthetic process;GO:0006023 aminoglycan biosynthetic process;GO:0030203 glycosaminoglycan metabolic process		Enzymes; Predicted intracellular proteins; ENZYME proteins:Transferases					0	0	0	0	0	0	0	0	0	0	0	0	0	0	0	0	0	0	0	0
SPON1	10418	symbol	H. sapiens	10418	H. sapiens	SPON1	spondin 1	GO:1902993 positive regulation of amyloid precursor protein catabolic process;GO:0010954 positive regulation of protein processing;GO:1903319 positive regulation of protein maturation		Predicted secreted proteins	Microtubule ends;Nucleoli (Approved); Additional: Actin filaments;Cytokinetic bridge;Nucleoplasm		(M3008)NABA ECM GLYCOPROTEINS; (M5884)NABA CORE MATRISOME; (M5889)NABA MATRISOME	(M5953)HALLMARK KRAS SIGNALING UP	0	0	0	0	0	0	0	0	0	0	0	0	0	0	0	0	1	0	0	0
B4GALNT1	2583	symbol	H. sapiens	2583	H. sapiens	B4GALNT1	beta-1,4-N-acetyl-galactosaminyltransferase 1	GO:0030259 lipid glycosylation;GO:0001574 ganglioside biosynthetic process;GO:0001573 ganglioside metabolic process		Human disease related genes:Nervous system diseases:Other nervous and sensory system diseases; Disease related genes; Potential drug targets; Enzymes; Predicted intracellular proteins; ENZYME proteins:Transferases					0	0	0	0	0	0	0	0	0	0	0	0	0	0	0	0	0	0	0	0
MIR31HG	554202	symbol	H. sapiens	554202	H. sapiens	MIR31HG	MIR31 host gene								0	0	0	0	0	0	0	0	0	0	0	0	0	0	0	0	0	0	0	0
DCUN1D2	55208	symbol	H. sapiens	55208	H. sapiens	DCUN1D2	defective in cullin neddylation 1 domain containing 2	GO:2000436 positive regulation of protein neddylation;GO:2000434 regulation of protein neddylation;GO:0045116 protein neddylation		Predicted intracellular proteins	Cytosol;Plasma membrane (Approved)				0	0	0	0	0	0	0	0	0	0	0	0	0	0	0	0	0	0	0	0
DFNB31	25861	gene_synonym	H. sapiens	25861	H. sapiens	WHRN	whirlin	GO:1990227 paranodal junction maintenance;GO:0021694 cerebellar Purkinje cell layer formation;GO:0050910 detection of mechanical stimulus involved in sensory perception of sound		Human disease related genes:Nervous system diseases:Eye disease; Human disease related genes:Nervous system diseases:Ear disease; Predicted intracellular proteins; Disease related genes					0	0	0	1	0	0	1	0	0	0	0	0	0	0	0	0	0	0	0	0
NTN1	9423	symbol	H. sapiens	9423	H. sapiens	NTN1	netrin 1	GO:0061643 chemorepulsion of axon;GO:0032488 Cdc42 protein signal transduction;GO:0033564 anterior/posterior axon guidance		Human disease related genes:Nervous system diseases:Other nervous and sensory system diseases; Cancer-related genes:Candidate cancer biomarkers; Predicted secreted proteins; Disease related genes; Predicted intracellular proteins	Cytosol (Approved); Additional: Actin filaments;Nucleoplasm		(M108)PID NETRIN PATHWAY; (M5887)NABA BASEMENT MEMBRANES; (M3008)NABA ECM GLYCOPROTEINS		1	0	0	1	1	1	1	1	0	0	0	1	0	0	0	0	0	0	1	1
SFXN5	94097	symbol	H. sapiens	94097	H. sapiens	SFXN5	sideroflexin 5	GO:0006842 tricarboxylic acid transport;GO:0015746 citrate transport;GO:1990542 mitochondrial transmembrane transport		Predicted intracellular proteins	Mitochondria;Nucleoplasm (Approved)				0	0	0	0	0	0	0	0	0	0	0	0	0	1	0	0	0	0	0	0
KCNS3	3790	symbol	H. sapiens	3790	H. sapiens	KCNS3	potassium voltage-gated channel modifier subfamily S member 3	GO:0071805 potassium ion transmembrane transport;GO:0006813 potassium ion transport;GO:0051260 protein homooligomerization		Predicted intracellular proteins; Transporters:Transporter channels and pores; Voltage-gated ion channels:Voltage-Gated Potassium Channels	Cytosol (Supported); Additional: Golgi apparatus;Plasma membrane				0	0	1	0	0	0	0	0	0	0	0	0	0	0	0	0	0	0	0	0
PGBD5	79605	symbol	H. sapiens	79605	H. sapiens	PGBD5	piggyBac transposable element derived 5	GO:0098038 non-replicative transposition, DNA-mediated;GO:0006313 transposition, DNA-mediated;GO:0032196 transposition		Predicted intracellular proteins; Disease related genes	Nucleoplasm (Supported)				0	0	0	0	0	0	0	0	0	0	1	0	0	0	0	1	0	0	0	0
GTF2IRD1	9569	symbol	H. sapiens	9569	H. sapiens	GTF2IRD1	GTF2I repeat domain containing 1	GO:0014886 transition between slow and fast fiber;GO:0014733 regulation of skeletal muscle adaptation;GO:0043502 regulation of muscle adaptation		Human disease related genes:Other congenital disorders:Chromosomal abnormalities; Predicted intracellular proteins; Disease related genes	Nucleoplasm (Supported); Additional: Cytosol				0	1	0	0	0	0	0	0	0	0	0	0	0	0	0	0	0	0	0	0
ADAP1	11033	symbol	H. sapiens	11033	H. sapiens	ADAP1	ArfGAP with dual PH domains 1	GO:0043547 positive regulation of GTPase activity;GO:0043087 regulation of GTPase activity;GO:0051345 positive regulation of hydrolase activity		Predicted intracellular proteins	Cytosol;Plasma membrane (Supported)		(M86)PID ARF6 PATHWAY; (M141)PID PI3KCI PATHWAY		0	0	0	0	0	0	0	0	0	1	0	0	0	0	0	0	0	0	0	0
IQCK	124152	symbol	H. sapiens	124152	H. sapiens	IQCK	IQ motif containing K			Predicted intracellular proteins	Nuclear speckles (Approved); Additional: Cytosol				0	0	0	0	0	0	0	0	0	0	0	0	0	0	0	0	0	0	0	0
SELK	58515	gene_synonym	H. sapiens	58515	H. sapiens	SELENOK	selenoprotein K	GO:0045728 respiratory burst after phagocytosis;GO:0010742 macrophage derived foam cell differentiation;GO:0090077 foam cell differentiation			Cytosol;Nucleoplasm (Approved)				0	1	1	0	1	0	0	0	0	0	0	0	0	0	0	0	0	0	0	0
MMP10	4319	symbol	H. sapiens	4319	H. sapiens	MMP10	matrix metallopeptidase 10	GO:0030574 collagen catabolic process;GO:0022617 extracellular matrix disassembly;GO:0032963 collagen metabolic process		Cancer-related genes:Candidate cancer biomarkers; ENZYME proteins:Hydrolases; Predicted secreted proteins; Peptidases:Metallopeptidases; Enzymes	Cytosol (Approved); Additional: Plasma membrane	Marimastat; N-ISOBUTYL-N-[4-METHOXYPHENYLSULFONYL]GLYCYL HYDROXAMIC ACID	(M3468)NABA ECM REGULATORS; (M5885)NABA MATRISOME ASSOCIATED; (M5889)NABA MATRISOME	(M5946)HALLMARK COAGULATION; (M5953)HALLMARK KRAS SIGNALING UP	0	0	0	0	0	0	0	0	1	0	0	0	0	0	0	0	0	0	0	0
RNF34	80196	symbol	H. sapiens	80196	H. sapiens	RNF34	ring finger protein 34	GO:2000374 regulation of oxygen metabolic process;GO:2001271 negative regulation of cysteine-type endopeptidase activity involved in execution phase of apoptosis;GO:2001270 regulation of cysteine-type endopeptidase activity involved in execution phase of apoptosis		Enzymes; Predicted intracellular proteins; ENZYME proteins:Transferases	Nucleoplasm (Supported); Additional: Nuclear bodies				0	1	0	0	0	0	0	0	0	0	0	0	0	0	0	0	0	0	0	0
RGS3	5998	symbol	H. sapiens	5998	H. sapiens	RGS3	regulator of G protein signaling 3	GO:0008277 regulation of G protein-coupled receptor signaling pathway;GO:0007186 G protein-coupled receptor signaling pathway;GO:0009968 negative regulation of signal transduction		Predicted intracellular proteins	Plasma membrane (Supported)		(M257)PID EPHRINB REV PATHWAY		0	0	0	0	0	0	0	0	0	0	0	0	0	0	1	0	0	0	1	0
LGI2	55203	symbol	H. sapiens	55203	H. sapiens	LGI2	leucine rich repeat LGI family member 2	GO:1904862 inhibitory synapse assembly;GO:0007416 synapse assembly;GO:0034329 cell junction assembly		Predicted secreted proteins	Centrosome (Uncertain)		(M3008)NABA ECM GLYCOPROTEINS; (M5884)NABA CORE MATRISOME; (M5889)NABA MATRISOME		0	0	0	0	0	0	0	0	0	0	0	0	0	0	0	0	0	0	0	0
HOXB9	3219	symbol	H. sapiens	3219	H. sapiens	HOXB9	homeobox B9	GO:0009954 proximal/distal pattern formation;GO:0048704 embryonic skeletal system morphogenesis;GO:0030879 mammary gland development		Transcription factors:Helix-turn-helix domains; Predicted intracellular proteins	Nucleoplasm (Supported)			(M5891)HALLMARK HYPOXIA	1	0	0	1	0	0	1	0	0	0	0	0	0	0	0	0	0	0	0	0
P4HA3	283208	symbol	H. sapiens	283208	H. sapiens	P4HA3	prolyl 4-hydroxylase subunit alpha 3	GO:0018401 peptidyl-proline hydroxylation to 4-hydroxy-L-proline;GO:0019511 peptidyl-proline hydroxylation;GO:0018126 protein hydroxylation		Enzymes; Predicted intracellular proteins; ENZYME proteins:Oxidoreductases			(M3468)NABA ECM REGULATORS; (M5885)NABA MATRISOME ASSOCIATED; (M5889)NABA MATRISOME		0	0	0	0	0	0	0	0	1	0	0	0	0	0	0	0	0	0	0	0
AUNIP	79000	symbol	H. sapiens	79000	H. sapiens	AUNIP	aurora kinase A and ninein interacting protein	GO:2001033 negative regulation of double-strand break repair via nonhomologous end joining;GO:2001032 regulation of double-strand break repair via nonhomologous end joining;GO:2000780 negative regulation of double-strand break repair		Predicted intracellular proteins	Centrosome (Supported)				0	0	0	0	0	0	0	0	0	0	0	0	0	0	0	1	0	0	0	0
E2F7	144455	symbol	H. sapiens	144455	H. sapiens	E2F7	E2F transcription factor 7	GO:0032877 positive regulation of DNA endoreduplication;GO:0071930 negative regulation of transcription involved in G1/S transition of mitotic cell cycle;GO:0032875 regulation of DNA endoreduplication		Transcription factors:Helix-turn-helix domains; Predicted intracellular proteins	Nuclear speckles (Supported)		(M40)PID E2F PATHWAY		1	0	0	1	0	0	1	0	0	0	0	1	0	0	0	0	0	0	0	1
CTAGE5	4253	gene_synonym	H. sapiens	4253	H. sapiens	MIA2	MIA SH3 domain ER export factor 2	GO:0035459 vesicle cargo loading;GO:0009306 protein secretion;GO:0035592 establishment of protein localization to extracellular region		Transporters; Predicted intracellular proteins; Disease related genes; Potential drug targets	Endoplasmic reticulum (Supported)				0	0	0	0	0	0	0	0	0	0	0	0	0	0	0	0	0	0	0	0
MPPED2	744	symbol	H. sapiens	744	H. sapiens	MPPED2	metallophosphoesterase domain containing 2			Predicted intracellular proteins	Nucleoli (Approved); Additional: Mitochondria;Vesicles			(M5906)HALLMARK ESTROGEN RESPONSE EARLY	0	0	0	0	0	0	0	0	0	0	0	0	0	0	0	0	0	0	0	0
MUC13	56667	symbol	H. sapiens	56667	H. sapiens	MUC13	mucin 13, cell surface associated	GO:0030277 maintenance of gastrointestinal epithelium;GO:0010669 epithelial structure maintenance;GO:0022600 digestive system process		Predicted secreted proteins			(M5880)NABA ECM AFFILIATED; (M5885)NABA MATRISOME ASSOCIATED; (M5889)NABA MATRISOME		0	0	0	0	0	0	0	0	1	0	0	0	0	0	0	0	0	0	0	0
CLK1	1195	symbol	H. sapiens	1195	H. sapiens	CLK1	CDC like kinase 1	GO:0018107 peptidyl-threonine phosphorylation;GO:0018210 peptidyl-threonine modification;GO:0018108 peptidyl-tyrosine phosphorylation	CMGC Ser/Thr protein kinase family	Enzymes; Kinases:CMGC Ser/Thr protein kinases; Predicted intracellular proteins; ENZYME proteins:Transferases	Nuclear membrane;Nucleoplasm (Supported)	Debromohymenialdisine; CHGN111; ethyl 3-[(E)-2-amino-1-cyanoethenyl]-6,7-dichloro-1-methyl-1H-indole-2-carboxylate; Fostamatinib			0	0	0	0	0	0	0	0	0	0	0	0	0	0	0	0	0	0	0	0
FAM219B	57184	symbol	H. sapiens	57184	H. sapiens	FAM219B	family with sequence similarity 219 member B			Predicted intracellular proteins	Nucleoplasm (Approved); Additional: Golgi apparatus				0	0	0	0	0	0	0	0	0	0	0	0	0	0	0	0	0	0	0	0
CCL26	10344	symbol	H. sapiens	10344	H. sapiens	CCL26	C-C motif chemokine ligand 26	GO:0010818 T cell chemotaxis;GO:0048245 eosinophil chemotaxis;GO:0072677 eosinophil migration		Predicted secreted proteins; Human disease related genes:Immune system diseases:Allergies and autoimmune diseases			(M28)PID IL4 2PATHWAY; (M5883)NABA SECRETED FACTORS; (M5885)NABA MATRISOME ASSOCIATED		0	1	0	0	1	1	1	0	1	1	0	0	0	0	0	0	0	0	0	0
PITPNC1	26207	symbol	H. sapiens	26207	H. sapiens	PITPNC1	phosphatidylinositol transfer protein cytoplasmic 1	GO:0120009 intermembrane lipid transfer;GO:0015914 phospholipid transport;GO:0015748 organophosphate ester transport		Predicted intracellular proteins	Cytosol (Approved); Additional: Nucleoplasm			(M5939)HALLMARK P53 PATHWAY	0	0	0	0	0	0	0	0	0	0	0	0	0	0	0	0	0	0	0	0
EDNRB	1910	symbol	H. sapiens	1910	H. sapiens	EDNRB	endothelin receptor type B	GO:0035645 enteric smooth muscle cell differentiation;GO:0097018 renal albumin absorption;GO:0007497 posterior midgut development		FDA approved drug targets:Small molecule drugs; Human disease related genes:Cancers:Head and neck cancers; Human disease related genes:Congenital malformations:Congenital malformations of the digestive system; Disease related genes; G-protein coupled receptors:GPCRs excl olfactory receptors; Human disease related genes:Other diseases:Others; Human disease related genes:Congenital disorders of met…	Plasma membrane (Supported); Additional: Cytosol	Bosentan; IRL-1620; Sitaxentan; Ambrisentan; Enrasentan; Tezosentan; Macitentan	(M67)PID ARF6 TRAFFICKING PATHWAY; (M8)PID ENDOTHELIN PATHWAY		0	1	1	0	0	1	1	1	0	0	0	0	0	0	1	0	0	0	0	0
MMP14	4323	symbol	H. sapiens	4323	H. sapiens	MMP14	matrix metallopeptidase 14	GO:1990834 response to odorant;GO:0043615 astrocyte cell migration;GO:0035988 chondrocyte proliferation		Cancer-related genes:Candidate cancer biomarkers; ENZYME proteins:Hydrolases; Transporters:Accessory Factors Involved in Transport; Predicted intracellular proteins; Peptidases:Metallopeptidases; Disease related genes; Potential drug targets; Enzymes; Human disease related genes:Musculoskeletal diseases:Other musculoskeletal diseases	Cytosol (Approved); Additional: Intermediate filaments	Marimastat	(M44)PID HIF2PATHWAY; (M281)PID FAK PATHWAY; (M3468)NABA ECM REGULATORS	(M5946)HALLMARK COAGULATION; (M5941)HALLMARK UV RESPONSE UP; (M5921)HALLMARK COMPLEMENT	1	1	0	1	1	1	0	1	1	0	0	1	1	0	0	0	1	0	0	0
ATG16L1	55054	symbol	H. sapiens	55054	H. sapiens	ATG16L1	autophagy related 16 like 1	GO:0039689 negative stranded viral RNA replication;GO:0061739 protein lipidation involved in autophagosome assembly;GO:0098792 xenophagy		Transporters; Human disease related genes:Immune system diseases:Other immune system diseases; Disease related genes; Potential drug targets; Predicted intracellular proteins	Cytosol (Approved)				0	0	0	0	0	0	0	1	0	0	0	0	0	0	0	0	0	1	0	0
TMEM132B	114795	symbol	H. sapiens	114795	H. sapiens	TMEM132B	transmembrane protein 132B	GO:0008150 biological_process							0	0	0	0	0	0	0	0	0	0	0	0	0	0	0	0	0	0	0	0
CCT5	22948	symbol	H. sapiens	22948	H. sapiens	CCT5	chaperonin containing TCP1 subunit 5	GO:1904851 positive regulation of establishment of protein localization to telomere;GO:0070203 regulation of establishment of protein localization to telomere;GO:1904869 regulation of protein localization to Cajal body		Predicted intracellular proteins; Disease related genes; Human disease related genes:Nervous system diseases:Other nervous and sensory system diseases				(M5926)HALLMARK MYC TARGETS V1	0	1	0	0	1	0	0	0	0	0	0	0	0	0	0	0	0	0	0	0
HPD	3242	symbol	H. sapiens	3242	H. sapiens	HPD	4-hydroxyphenylpyruvate dioxygenase	GO:0006572 tyrosine catabolic process;GO:0006559 L-phenylalanine catabolic process;GO:1902222 erythrose 4-phosphate/phosphoenolpyruvate family amino acid catabolic process		FDA approved drug targets:Small molecule drugs; ENZYME proteins:Oxidoreductases; Human disease related genes:Congenital disorders of metabolism:Congenital disorders of amino acid metabolism; Disease related genes; Enzymes; Predicted intracellular proteins	Nuclear speckles (Uncertain)	Nitisinone; DAS869			0	0	0	0	0	0	0	0	0	0	0	0	0	0	0	0	0	0	0	0
NCALD	83988	symbol	H. sapiens	83988	H. sapiens	NCALD	neurocalcin delta	GO:0003073 regulation of systemic arterial blood pressure;GO:0019722 calcium-mediated signaling;GO:0008217 regulation of blood pressure		Predicted intracellular proteins					0	0	1	0	0	0	0	0	0	0	0	0	0	0	0	0	0	0	0	0
EML6	400954	symbol	H. sapiens	400954	H. sapiens	EML6	EMAP like 6			Predicted intracellular proteins	Mitochondria (Approved); Additional: Vesicles				0	0	0	0	0	0	0	0	0	0	0	0	0	0	0	0	0	0	0	0
LIN52	91750	symbol	H. sapiens	91750	H. sapiens	LIN52	lin-52 DREAM MuvB core complex component	GO:0006351 transcription, DNA-templated;GO:0097659 nucleic acid-templated transcription;GO:0032774 RNA biosynthetic process		Predicted intracellular proteins	Nuclear speckles (Approved)				0	0	0	0	0	0	0	0	0	0	0	0	0	0	0	0	0	0	0	0
UFD1L	7353	gene_synonym	H. sapiens	7353	H. sapiens	UFD1	ubiquitin recognition factor in ER associated degradation 1	GO:0039536 negative regulation of RIG-I signaling pathway;GO:0039532 negative regulation of viral-induced cytoplasmic pattern recognition receptor signaling pathway;GO:0071712 ER-associated misfolded protein catabolic process		Transporters:Primary Active Transporters; Predicted intracellular proteins	Cytosol;Nucleoplasm (Approved); Additional: Nucleoli				1	1	0	0	0	0	0	0	0	0	0	0	0	0	0	0	0	0	0	0
GPATCH11	253635	symbol	H. sapiens	253635	H. sapiens	GPATCH11	G-patch domain containing 11			Predicted intracellular proteins	Nucleoplasm (Supported)				0	0	0	0	0	0	0	0	0	0	0	0	0	0	0	0	0	0	0	0
RASA3	22821	symbol	H. sapiens	22821	H. sapiens	RASA3	RAS p21 protein activator 3	GO:0051209 release of sequestered calcium ion into cytosol;GO:0046580 negative regulation of Ras protein signal transduction;GO:0051283 negative regulation of sequestering of calcium ion		RAS pathway related proteins; Predicted intracellular proteins					0	0	1	0	0	0	0	0	0	1	0	0	0	0	0	0	1	0	0	0
EFR3B	22979	symbol	H. sapiens	22979	H. sapiens	EFR3B	EFR3 homolog B	GO:0046854 phosphatidylinositol phosphate biosynthetic process;GO:0006661 phosphatidylinositol biosynthetic process;GO:0046488 phosphatidylinositol metabolic process		Predicted intracellular proteins	Plasma membrane (Supported); Additional: Actin filaments;Cytosol				0	0	0	0	0	0	0	0	0	0	0	0	0	0	0	0	0	0	0	0
CGB7	94027	symbol	H. sapiens	94027	H. sapiens	CGB7	chorionic gonadotropin subunit beta 7	GO:0007292 female gamete generation;GO:0007276 gamete generation;GO:0048609 multicellular organismal reproductive process		Predicted secreted proteins	Cytosol (Approved)				0	0	0	0	0	0	0	0	0	0	0	0	0	0	0	0	0	0	0	0
APCDD1L-AS1	149773	gene_synonym	H. sapiens	149773	H. sapiens	APCDD1L-DT	APCDD1L divergent transcript								0	0	0	0	0	0	0	0	0	0	0	0	0	0	0	0	0	0	0	0
ZNF331	55422	symbol	H. sapiens	55422	H. sapiens	ZNF331	zinc finger protein 331	GO:0006357 regulation of transcription by RNA polymerase II;GO:0006355 regulation of transcription, DNA-templated;GO:1903506 regulation of nucleic acid-templated transcription		Transcription factors:Zinc-coordinating DNA-binding domains; Predicted intracellular proteins; Cancer-related genes	Nucleoplasm (Approved)				0	0	0	0	0	0	0	0	0	0	0	0	0	0	0	0	0	0	0	0
HTR2A	3356	symbol	H. sapiens	3356	H. sapiens	HTR2A	5-hydroxytryptamine receptor 2A	GO:0007208 phospholipase C-activating serotonin receptor signaling pathway;GO:0010513 positive regulation of phosphatidylinositol biosynthetic process;GO:0010511 regulation of phosphatidylinositol biosynthetic process		G-protein coupled receptors:GPCRs excl olfactory receptors; G-protein coupled receptors:Serotonin receptors; FDA approved drug targets:Small molecule drugs; Human disease related genes:Other diseases:Mental and behavioural disorders		Ziprasidone; Methysergide; Cabergoline; Zolmitriptan; Amitriptyline; Olanzapine; Clozapine; Mirtazapine; Loxapine; Remoxipride; Promazine; Cyproheptadine; Imipramine; Chlorpromazine; Haloperidol; Nortriptyline; Amoxapine; Lamotrigine; Fenfluramine; Lisuride; Cisapride; Fluphenazine; Trazodone; Thioridazine; Ergotamine; Apomorphine; Paroxetine; Trimipramine; Risperidone; Epinastine; Propiomazine; …			0	1	1	0	1	1	0	0	0	1	0	0	0	0	1	0	0	1	0	0
DNASE1L3	1776	symbol	H. sapiens	1776	H. sapiens	DNASE1L3	deoxyribonuclease 1 like 3	GO:0070948 regulation of neutrophil mediated cytotoxicity;GO:0010623 programmed cell death involved in cell development;GO:0006309 apoptotic DNA fragmentation		Predicted secreted proteins; Predicted intracellular proteins; Disease related genes					0	1	0	0	0	0	0	0	0	0	0	0	0	0	0	1	0	0	0	0
FHOD3	80206	symbol	H. sapiens	80206	H. sapiens	FHOD3	formin homology 2 domain containing 3	GO:0051639 actin filament network formation;GO:0055003 cardiac myofibril assembly;GO:0045214 sarcomere organization		Predicted intracellular proteins					0	0	0	0	0	1	0	0	0	0	0	0	0	0	0	0	0	0	0	0
PQLC2L	152078	gene_synonym	H. sapiens	152078	H. sapiens	SLC66A1L	solute carrier family 66 member 1 like	GO:1903826 L-arginine transmembrane transport;GO:1902022 L-lysine transport;GO:1903401 L-lysine transmembrane transport							0	0	1	0	0	0	0	0	0	0	0	0	0	1	0	0	0	0	0	0
S1PR1	1901	symbol	H. sapiens	1901	H. sapiens	S1PR1	sphingosine-1-phosphate receptor 1	GO:0003245 cardiac muscle tissue growth involved in heart morphogenesis;GO:0003241 growth involved in heart morphogenesis;GO:0001955 blood vessel maturation		Transporters; FDA approved drug targets:Small molecule drugs; G-protein coupled receptors:Lysolipids receptors; CD markers; Cancer-related genes:Candidate cancer biomarkers; FDA approved drug targets:Biotech drugs; G-protein coupled receptors:GPCRs excl olfactory receptors	Vesicles (Supported)	Fingolimod; Asfotase alfa; Siponimod; Ozanimod	(M103)PID S1P S1P1 PATHWAY; (M155)PID S1P META PATHWAY; (M55)PID S1P S1P3 PATHWAY		1	1	1	0	1	1	1	0	0	1	1	1	0	0	1	0	0	0	0	0
SLC9B2	133308	symbol	H. sapiens	133308	H. sapiens	SLC9B2	solute carrier family 9 member B2	GO:2001206 positive regulation of osteoclast development;GO:2001204 regulation of osteoclast development;GO:0045672 positive regulation of osteoclast differentiation		Transporters:Electrochemical Potential-driven transporters	Cell Junctions;Nucleoplasm (Approved)				0	1	1	0	0	0	0	1	0	0	0	0	0	0	0	0	0	0	0	0
SLC6A17	388662	symbol	H. sapiens	388662	H. sapiens	SLC6A17	solute carrier family 6 member 17	GO:0015820 leucine transport;GO:0015824 proline transport;GO:0015803 branched-chain amino acid transport		Transporters:Electrochemical Potential-driven transporters; Human disease related genes:Other diseases:Mental and behavioural disorders; Disease related genes; Potential drug targets	Mitochondria (Approved)				0	0	1	0	0	0	0	0	0	0	0	0	0	1	0	0	0	0	0	0
ORC6	23594	symbol	H. sapiens	23594	H. sapiens	ORC6	origin recognition complex subunit 6	GO:0051782 negative regulation of cell division;GO:0006270 DNA replication initiation;GO:0006261 DNA-dependent DNA replication		Human disease related genes:Congenital malformations:Other congenital malformations; Predicted intracellular proteins; Disease related genes	Nucleoplasm (Approved); Additional: Nucleoli fibrillar center			(M5901)HALLMARK G2M CHECKPOINT; (M5925)HALLMARK E2F TARGETS	0	0	0	0	0	0	0	0	0	0	0	0	0	0	0	1	0	0	0	1
BMPR1B	658	symbol	H. sapiens	658	H. sapiens	BMPR1B	bone morphogenetic protein receptor type 1B	GO:0001550 ovarian cumulus expansion;GO:0048165 fused antrum stage;GO:1902731 negative regulation of chondrocyte proliferation	TKL Ser/Thr protein kinase family	Kinases:TKL Ser/Thr protein kinases; CD markers; Human disease related genes:Congenital malformations:Congenital malformations of the musculoskeletal system; Disease related genes; Potential drug targets; Enzymes; Predicted intracellular proteins; ENZYME proteins:Transferases		Fostamatinib	(M181)PID BMP PATHWAY	(M5908)HALLMARK ANDROGEN RESPONSE; (M5935)HALLMARK FATTY ACID METABOLISM; (M5956)HALLMARK KRAS SIGNALING DN	1	1	0	0	0	0	1	0	0	0	1	0	1	0	0	0	0	0	1	0
COL10A1	1300	symbol	H. sapiens	1300	H. sapiens	COL10A1	collagen type X alpha 1 chain	GO:0030198 extracellular matrix organization;GO:0043062 extracellular structure organization;GO:0045229 external encapsulating structure organization		Human disease related genes:Congenital malformations:Congenital malformations of the musculoskeletal system; Predicted secreted proteins; Disease related genes	Endoplasmic reticulum (Approved)		(M3005)NABA COLLAGENS; (M198)PID SYNDECAN 1 PATHWAY; (M160)PID AVB3 INTEGRIN PATHWAY		1	0	0	0	0	0	0	1	1	0	0	0	0	0	0	0	0	0	0	0
KDR	3791	symbol	H. sapiens	3791	H. sapiens	KDR	kinase insert domain receptor	GO:1904881 cellular response to hydrogen sulfide;GO:0048597 post-embryonic camera-type eye morphogenesis;GO:1904880 response to hydrogen sulfide	Tyr protein kinase family	Human disease related genes:Cardiovascular diseases:Vascular diseases; FDA approved drug targets:Small molecule drugs; CD markers; Cancer-related genes:Candidate cancer biomarkers; FDA approved drug targets:Biotech drugs; Kinases:Tyr protein kinases; Disease related genes; Enzymes; RAS pathway related proteins; ENZYME proteins:Transferases	Vesicles (Approved); Additional: Nuclear membrane	Sorafenib; Sunitinib; 1-{4-[4-Amino-6-(4-methoxyphenyl)furo[2,3-d]pyrimidin-5-yl]phenyl}-3-[2-fluoro-5-(trifluoromethyl)phenyl]urea; Cediranib; Vatalanib; XL999; TG-100801; XL820; CYC116; Ramucirumab; Pegdinetanib; RAF-265; ABT-869; IMC-1C11; Semaxanib; Pazopanib; Midostaurin; Axitinib; 4-[[2-[[4-chloro-3-(trifluoromethyl)phenyl]amino]-3H-benzimidazol-5-yl]oxy]-N-methyl-pyridine-2-carboxamide; N-…	(M137)PID VEGF VEGFR PATHWAY; (M103)PID S1P S1P1 PATHWAY; (M44)PID HIF2PATHWAY		1	1	1	1	1	0	1	0	1	0	1	1	0	0	0	0	0	1	0	0
DSN1	79980	symbol	H. sapiens	79980	H. sapiens	DSN1	DSN1 component of MIS12 kinetochore complex	GO:0000070 mitotic sister chromatid segregation;GO:0000819 sister chromatid segregation;GO:0140014 mitotic nuclear division		Predicted intracellular proteins	Nucleoplasm (Supported); Additional: Cytosol;Kinetochore;Nuclear bodies;Nucleoli fibrillar center				0	0	0	0	0	0	0	0	0	0	0	0	0	0	0	0	0	0	0	0
CDA	978	symbol	H. sapiens	978	H. sapiens	CDA	cytidine deaminase	GO:0071217 cellular response to external biotic stimulus;GO:0019858 cytosine metabolic process;GO:0046898 response to cycloheximide		Enzymes; ENZYME proteins:Hydrolases; FDA approved drug targets:Small molecule drugs; Predicted intracellular proteins	Nucleoplasm (Approved)	1-Beta-Ribofuranosyl-1,3-Diazepinone		(M5898)HALLMARK DNA REPAIR; (M5921)HALLMARK COMPLEMENT; (M5934)HALLMARK XENOBIOTIC METABOLISM	0	1	0	0	0	0	0	0	0	0	0	0	0	0	0	0	0	1	0	0
HAUS8	93323	symbol	H. sapiens	93323	H. sapiens	HAUS8	HAUS augmin like complex subunit 8	GO:0007098 centrosome cycle;GO:0051225 spindle assembly;GO:0031023 microtubule organizing center organization		Predicted intracellular proteins					0	0	0	0	0	0	0	0	0	0	0	0	0	0	0	0	0	0	0	0
IGF1	3479	symbol	H. sapiens	3479	H. sapiens	IGF1	insulin like growth factor 1	GO:0060283 negative regulation of oocyte development;GO:1904073 regulation of trophectodermal cell proliferation;GO:1904075 positive regulation of trophectodermal cell proliferation		Predicted secreted proteins; Human disease related genes:Endocrine and metabolic diseases:Hypothalamus and pituitary gland diseases; Disease related genes; Human disease related genes:Cancers:Cancers of the lung and pleura; RAS pathway related proteins		N,N-Bis(3-(D-gluconamido)propyl)deoxycholamide; N-Dodecyl-N,N-Dimethyl-3-Ammonio-1-Propanesulfonate	(M295)SIG PIP3 SIGNALING IN CARDIAC MYOCTES; (M5883)NABA SECRETED FACTORS; (M5885)NABA MATRISOME ASSOCIATED	(M5909)HALLMARK MYOGENESIS; (M5934)HALLMARK XENOBIOTIC METABOLISM	1	1	0	0	1	1	0	1	1	0	0	0	0	0	0	0	0	1	0	0
EXO1	9156	symbol	H. sapiens	9156	H. sapiens	EXO1	exonuclease 1	GO:0001325 formation of extrachromosomal circular DNA;GO:0090656 t-circle formation;GO:0090737 telomere maintenance via telomere trimming		Predicted intracellular proteins	Nucleoplasm (Enhanced); Additional: Nuclear bodies			(M5901)HALLMARK G2M CHECKPOINT	0	0	0	0	0	0	0	0	0	0	0	0	0	0	0	1	0	0	0	0
TEF	7008	symbol	H. sapiens	7008	H. sapiens	TEF	TEF transcription factor, PAR bZIP family member	GO:0048511 rhythmic process;GO:0045944 positive regulation of transcription by RNA polymerase II;GO:0045893 positive regulation of transcription, DNA-templated		Transcription factors:Basic domains; Predicted intracellular proteins					0	0	0	0	0	0	0	0	0	0	0	0	0	0	0	0	0	0	0	0
CALB2	794	symbol	H. sapiens	794	H. sapiens	CALB2	calbindin 2	GO:0099509 regulation of presynaptic cytosolic calcium ion concentration;GO:0070050 neuron cellular homeostasis;GO:1900271 regulation of long-term synaptic potentiation		Transporters:Accessory Factors Involved in Transport; Predicted intracellular proteins	Cytosol (Enhanced)	Calcium citrate; Calcium Phosphate; Calcium levulinate; Calcium phosphate dihydrate		(M5906)HALLMARK ESTROGEN RESPONSE EARLY; (M5915)HALLMARK APICAL JUNCTION	0	0	1	0	0	0	0	0	0	0	0	0	0	0	0	0	0	0	0	0
SLCO3A1	28232	symbol	H. sapiens	28232	H. sapiens	SLCO3A1	solute carrier organic anion transporter family member 3A1	GO:0015732 prostaglandin transport;GO:0043252 sodium-independent organic anion transport;GO:0071715 icosanoid transport		Transporters:Electrochemical Potential-driven transporters					0	1	1	0	0	0	0	0	0	0	0	0	0	1	0	0	0	0	0	0
MARCKSL1	65108	symbol	H. sapiens	65108	H. sapiens	MARCKSL1	MARCKS like 1	GO:0007015 actin filament organization;GO:0097435 supramolecular fiber organization;GO:0030036 actin cytoskeleton organization		Predicted intracellular proteins	Cytosol (Supported); Additional: Actin filaments;Nucleoplasm				0	0	0	0	0	0	0	0	0	0	0	0	0	0	0	0	0	0	0	0
GLIPR2	152007	symbol	H. sapiens	152007	H. sapiens	GLIPR2	GLI pathogenesis related 2	GO:0010718 positive regulation of epithelial to mesenchymal transition;GO:0010717 regulation of epithelial to mesenchymal transition;GO:0010634 positive regulation of epithelial cell migration		Predicted intracellular proteins	Vesicles (Uncertain); Additional: Microtubules	L-cysteic acid		(M5947)HALLMARK IL2 STAT5 SIGNALING	0	0	0	0	1	0	0	0	0	0	1	0	0	0	0	0	0	0	0	0
DYNLT1	6993	symbol	H. sapiens	6993	H. sapiens	DYNLT1	dynein light chain Tctex-type 1	GO:0075519 microtubule-dependent intracellular transport of viral material;GO:0075521 microtubule-dependent intracellular transport of viral material towards nucleus;GO:0075606 transport of viral material towards nucleus		Predicted intracellular proteins	Nucleoplasm (Approved)		(M163)PID LIS1 PATHWAY; (M187)PID TRKR PATHWAY		0	0	0	0	0	0	0	1	0	0	0	0	0	0	1	0	0	0	0	0
ABHD3	171586	symbol	H. sapiens	171586	H. sapiens	ABHD3	abhydrolase domain containing 3, phospholipase	GO:0051793 medium-chain fatty acid catabolic process;GO:0051792 medium-chain fatty acid biosynthetic process;GO:0051791 medium-chain fatty acid metabolic process		Enzymes; ENZYME proteins:Hydrolases; Predicted intracellular proteins	Nucleoplasm;Plasma membrane (Approved); Additional: Vesicles				0	0	0	0	0	0	0	0	0	0	0	0	0	0	0	0	0	0	0	0
FKBP11	51303	symbol	H. sapiens	51303	H. sapiens	FKBP11	FKBP prolyl isomerase 11	GO:0000413 protein peptidyl-prolyl isomerization;GO:0018208 peptidyl-proline modification;GO:0061077 chaperone-mediated protein folding		Enzymes; ENZYME proteins:Isomerase; Predicted intracellular proteins	Centrosome (Approved)				0	0	0	0	0	0	0	0	0	0	0	0	0	0	0	0	0	0	0	0
PTHLH	5744	symbol	H. sapiens	5744	H. sapiens	PTHLH	parathyroid hormone like hormone	GO:0061182 negative regulation of chondrocyte development;GO:0061181 regulation of chondrocyte development;GO:0002076 osteoblast development		Human disease related genes:Congenital malformations:Congenital malformations of the musculoskeletal system; Predicted secreted proteins; Disease related genes; Cancer-related genes:Candidate cancer biomarkers	Cytosol;Nucleoplasm (Supported); Additional: Golgi apparatus		(M211)PID HEDGEHOG 2PATHWAY	(M5930)HALLMARK EPITHELIAL MESENCHYMAL TRANSITION	1	0	0	0	0	0	0	1	0	0	0	0	1	0	1	0	0	0	0	0
CREM	1390	symbol	H. sapiens	1390	H. sapiens	CREM	cAMP responsive element modulator	GO:0048511 rhythmic process;GO:0007283 spermatogenesis;GO:0048232 male gamete generation		Transcription factors:Basic domains; Predicted intracellular proteins	Nucleoplasm (Supported); Additional: Vesicles				0	0	0	0	0	0	0	0	0	0	0	0	0	0	0	0	0	0	0	0
FEN1	2237	symbol	H. sapiens	2237	H. sapiens	FEN1	flap structure-specific endonuclease 1	GO:0043137 DNA replication, removal of RNA primer;GO:0032201 telomere maintenance via semi-conservative replication;GO:0045876 positive regulation of sister chromatid cohesion		Predicted intracellular proteins; Cancer-related genes:Candidate cancer biomarkers	Nucleoplasm (Enhanced); Additional: Nucleoli	Iron; Ferrous gluconate; Ferrous succinate; Ferrous ascorbate; Ferrous fumarate; Ferrous glycine sulfate		(M5898)HALLMARK DNA REPAIR; (M5941)HALLMARK UV RESPONSE UP	0	0	0	0	1	0	0	0	0	0	0	0	0	0	0	1	0	0	0	0
NGEF	25791	symbol	H. sapiens	25791	H. sapiens	NGEF	neuronal guanine nucleotide exchange factor	GO:0061002 negative regulation of dendritic spine morphogenesis;GO:0061000 negative regulation of dendritic spine development;GO:0061001 regulation of dendritic spine morphogenesis		Predicted intracellular proteins	Cytosol;Plasma membrane (Approved)		(M83)PID CDC42 REG PATHWAY; (M177)PID EPHA FWDPATHWAY; (M241)PID RAC1 REG PATHWAY		0	0	0	0	0	1	0	0	0	1	0	0	0	0	1	0	0	0	1	0
ARPC5L	81873	symbol	H. sapiens	81873	H. sapiens	ARPC5L	actin related protein 2/3 complex subunit 5 like	GO:0034314 Arp2/3 complex-mediated actin nucleation;GO:0045010 actin nucleation;GO:0030833 regulation of actin filament polymerization		Predicted intracellular proteins				(M5924)HALLMARK MTORC1 SIGNALING	0	0	0	0	0	1	0	0	0	0	0	0	0	0	0	0	0	0	0	0
EXO5	64789	symbol	H. sapiens	64789	H. sapiens	EXO5	exonuclease 5	GO:0036297 interstrand cross-link repair;GO:0090305 nucleic acid phosphodiester bond hydrolysis;GO:0006281 DNA repair		Predicted intracellular proteins	Nucleoplasm (Supported); Additional: Cytosol				0	0	0	0	0	0	0	0	0	0	0	0	0	0	0	1	0	0	0	0

## Sheet: Enrichment
GroupID	Category	Term	Description	LogP	Log(q-value)	InTerm_InList	Genes	Symbols
1_Summary	GO Biological Processes	GO:0001503	ossification	-5.39757	-1.33863	8/271	658,1591,3479,4323,5744,6615,6781,7043,1300,3219,7353,3791,4824,144455,1901,9423,10194	BMPR1B,CYP24A1,IGF1,MMP14,PTHLH,SNAI1,STC1,TGFB3,COL10A1,HOXB9,UFD1,KDR,NKX3-1,E2F7,S1PR1,NTN1,TSHZ1
1_Member	GO Biological Processes	GO:0001503	ossification	-5.39757	-1.33863	8/271	658,1591,3479,4323,5744,6615,6781,7043	BMPR1B,CYP24A1,IGF1,MMP14,PTHLH,SNAI1,STC1,TGFB3
1_Member	GO Biological Processes	GO:0001501	skeletal system development	-5.15116	-1.33863	10/495	658,1300,3219,3479,4323,5744,6615,6781,7043,7353	BMPR1B,COL10A1,HOXB9,IGF1,MMP14,PTHLH,SNAI1,STC1,TGFB3,UFD1
1_Member	GO Biological Processes	GO:0060349	bone morphogenesis	-3.4769	-0.636418	4/97	658,4323,6781,7043	BMPR1B,MMP14,STC1,TGFB3
1_Member	GO Biological Processes	GO:0048608	reproductive structure development	-3.25211	-0.550953	7/419	658,3791,4323,4824,6615,6781,144455	BMPR1B,KDR,MMP14,NKX3-1,SNAI1,STC1,E2F7
1_Member	GO Biological Processes	GO:0060348	bone development	-3.24235	-0.550953	5/198	658,3479,4323,6781,7043	BMPR1B,IGF1,MMP14,STC1,TGFB3
1_Member	GO Biological Processes	GO:0061458	reproductive system development	-3.23382	-0.550953	7/422	658,3791,4323,4824,6615,6781,144455	BMPR1B,KDR,MMP14,NKX3-1,SNAI1,STC1,E2F7
1_Member	GO Biological Processes	GO:0001541	ovarian follicle development	-3.11109	-0.49102	3/53	658,3791,4323	BMPR1B,KDR,MMP14
1_Member	GO Biological Processes	GO:0060350	endochondral bone morphogenesis	-3.04118	-0.435912	3/56	658,4323,6781	BMPR1B,MMP14,STC1
1_Member	GO Biological Processes	GO:0048705	skeletal system morphogenesis	-2.99316	-0.413246	5/225	658,3219,4323,6781,7043	BMPR1B,HOXB9,MMP14,STC1,TGFB3
1_Member	GO Biological Processes	GO:0048729	tissue morphogenesis	-2.55761	-0.233172	7/554	1901,3791,4323,4824,6615,6781,9423	S1PR1,KDR,MMP14,NKX3-1,SNAI1,STC1,NTN1
1_Member	GO Biological Processes	GO:0007389	pattern specification process	-2.40184	-0.132471	6/443	658,3219,4824,6615,6781,10194	BMPR1B,HOXB9,NKX3-1,SNAI1,STC1,TSHZ1
1_Member	GO Biological Processes	GO:0008585	female gonad development	-2.37131	-0.119104	3/96	658,3791,4323	BMPR1B,KDR,MMP14
1_Member	GO Biological Processes	GO:0046545	development of primary female sexual characteristics	-2.32179	-0.0799645	3/100	658,3791,4323	BMPR1B,KDR,MMP14
1_Member	GO Biological Processes	GO:1901888	regulation of cell junction assembly	-2.31296	-0.0780628	4/201	3791,4323,6615,9423	KDR,MMP14,SNAI1,NTN1
1_Member	GO Biological Processes	GO:0003002	regionalization	-2.26472	-0.0526306	5/332	658,3219,4824,6615,10194	BMPR1B,HOXB9,NKX3-1,SNAI1,TSHZ1
1_Member	GO Biological Processes	GO:0008406	gonad development	-2.19666	-0.00637193	4/217	658,3791,4323,4824	BMPR1B,KDR,MMP14,NKX3-1
1_Member	GO Biological Processes	GO:0045137	development of primary sexual characteristics	-2.16235	0	4/222	658,3791,4323,4824	BMPR1B,KDR,MMP14,NKX3-1
1_Member	GO Biological Processes	GO:0046660	female sex differentiation	-2.15376	0	3/115	658,3791,4323	BMPR1B,KDR,MMP14
2_Summary	GO Biological Processes	GO:0051046	regulation of secretion	-5.17941	-1.33863	11/606	1910,2852,3356,3479,3598,4824,6781,7043,84830,114899,133308,3791,658,28232,22948,58515,978,6615,1591,80196,1645,4323,1901,9569,1776,7353,10344	EDNRB,GPER1,HTR2A,IGF1,IL13RA2,NKX3-1,STC1,TGFB3,ADTRP,C1QTNF3,SLC9B2,KDR,BMPR1B,SLCO3A1,CCT5,SELENOK,CDA,SNAI1,CYP24A1,RNF34,AKR1C1,MMP14,S1PR1,GTF2IRD1,DNASE1L3,UFD1,CCL26
2_Member	GO Biological Processes	GO:0051046	regulation of secretion	-5.17941	-1.33863	11/606	1910,2852,3356,3479,3598,4824,6781,7043,84830,114899,133308	EDNRB,GPER1,HTR2A,IGF1,IL13RA2,NKX3-1,STC1,TGFB3,ADTRP,C1QTNF3,SLC9B2
2_Member	GO Biological Processes	GO:0043491	protein kinase B signaling	-5.08219	-1.33863	4/38	3479,3791,4824,84830	IGF1,KDR,NKX3-1,ADTRP
2_Member	GO Biological Processes	GO:1903530	regulation of secretion by cell	-3.98422	-0.838076	9/549	2852,3356,3479,3598,4824,7043,84830,114899,133308	GPER1,HTR2A,IGF1,IL13RA2,NKX3-1,TGFB3,ADTRP,C1QTNF3,SLC9B2
2_Member	GO Biological Processes	GO:0014068	positive regulation of phosphatidylinositol 3-kinase signaling	-3.81959	-0.774993	4/79	2852,3479,3791,4824	GPER1,IGF1,KDR,NKX3-1
2_Member	GO Biological Processes	GO:0001934	positive regulation of protein phosphorylation	-3.77324	-0.770034	10/722	658,1910,2852,3356,3479,3791,4824,7043,28232,84830	BMPR1B,EDNRB,GPER1,HTR2A,IGF1,KDR,NKX3-1,TGFB3,SLCO3A1,ADTRP
2_Member	GO Biological Processes	GO:0050708	regulation of protein secretion	-3.65953	-0.728873	6/252	2852,3479,7043,84830,114899,133308	GPER1,IGF1,TGFB3,ADTRP,C1QTNF3,SLC9B2
2_Member	GO Biological Processes	GO:0070201	regulation of establishment of protein localization	-3.41003	-0.595882	8/520	2852,3479,7043,22948,58515,84830,114899,133308	GPER1,IGF1,TGFB3,CCT5,SELENOK,ADTRP,C1QTNF3,SLC9B2
2_Member	GO Biological Processes	GO:0051047	positive regulation of secretion	-3.25737	-0.550953	6/300	1910,2852,3479,4824,7043,114899	EDNRB,GPER1,IGF1,NKX3-1,TGFB3,C1QTNF3
2_Member	GO Biological Processes	GO:0014066	regulation of phosphatidylinositol 3-kinase signaling	-3.25489	-0.550953	4/111	2852,3479,3791,4824	GPER1,IGF1,KDR,NKX3-1
2_Member	GO Biological Processes	GO:0050714	positive regulation of protein secretion	-3.02316	-0.425723	4/128	2852,3479,7043,114899	GPER1,IGF1,TGFB3,C1QTNF3
2_Member	GO Biological Processes	GO:0062012	regulation of small molecule metabolic process	-2.96247	-0.409234	6/342	978,2852,3356,3479,6615,114899	CDA,GPER1,HTR2A,IGF1,SNAI1,C1QTNF3
2_Member	GO Biological Processes	GO:2000242	negative regulation of reproductive process	-2.89248	-0.379363	3/63	3479,4824,6615	IGF1,NKX3-1,SNAI1
2_Member	GO Biological Processes	GO:0030522	intracellular receptor signaling pathway	-2.87911	-0.374658	4/140	1591,2852,4824,80196	CYP24A1,GPER1,NKX3-1,RNF34
2_Member	GO Biological Processes	GO:0071383	cellular response to steroid hormone stimulus	-2.85643	-0.374658	4/142	2852,4824,6781,84830	GPER1,NKX3-1,STC1,ADTRP
2_Member	GO Biological Processes	GO:0051223	regulation of protein transport	-2.83211	-0.367291	7/495	2852,3479,7043,58515,84830,114899,133308	GPER1,IGF1,TGFB3,SELENOK,ADTRP,C1QTNF3,SLC9B2
2_Member	GO Biological Processes	GO:0071396	cellular response to lipid	-2.81223	-0.364042	7/499	1591,1645,1910,2852,4824,6781,84830	CYP24A1,AKR1C1,EDNRB,GPER1,NKX3-1,STC1,ADTRP
2_Member	GO Biological Processes	GO:2001233	regulation of apoptotic signaling pathway	-2.80658	-0.364042	6/367	658,2852,3479,4824,6615,80196	BMPR1B,GPER1,IGF1,NKX3-1,SNAI1,RNF34
2_Member	GO Biological Processes	GO:2001236	regulation of extrinsic apoptotic signaling pathway	-2.73774	-0.311189	4/153	658,2852,3479,80196	BMPR1B,GPER1,IGF1,RNF34
2_Member	GO Biological Processes	GO:0045913	positive regulation of carbohydrate metabolic process	-2.642	-0.268465	3/77	2852,3356,3479	GPER1,HTR2A,IGF1
2_Member	GO Biological Processes	GO:0051149	positive regulation of muscle cell differentiation	-2.642	-0.268465	3/77	2852,3479,4323	GPER1,IGF1,MMP14
2_Member	GO Biological Processes	GO:0048545	response to steroid hormone	-2.63182	-0.268465	5/272	2852,4824,6781,7043,84830	GPER1,NKX3-1,STC1,TGFB3,ADTRP
2_Member	GO Biological Processes	GO:1903532	positive regulation of secretion by cell	-2.61809	-0.259533	5/274	2852,3479,4824,7043,114899	GPER1,IGF1,NKX3-1,TGFB3,C1QTNF3
2_Member	GO Biological Processes	GO:0048660	regulation of smooth muscle cell proliferation	-2.57191	-0.242339	4/170	1901,2852,3479,7043	S1PR1,GPER1,IGF1,TGFB3
2_Member	GO Biological Processes	GO:2000241	regulation of reproductive process	-2.51779	-0.201549	4/176	1910,3479,4824,6615	EDNRB,IGF1,NKX3-1,SNAI1
2_Member	GO Biological Processes	GO:1904705	regulation of vascular associated smooth muscle cell proliferation	-2.50568	-0.193477	3/86	2852,3479,7043	GPER1,IGF1,TGFB3
2_Member	GO Biological Processes	GO:0044057	regulation of system process	-2.477	-0.176697	7/573	1910,2852,3356,3479,4824,6781,9569	EDNRB,GPER1,HTR2A,IGF1,NKX3-1,STC1,GTF2IRD1
2_Member	GO Biological Processes	GO:0006109	regulation of carbohydrate metabolic process	-2.45725	-0.168522	4/183	2852,3356,3479,114899	GPER1,HTR2A,IGF1,C1QTNF3
2_Member	GO Biological Processes	GO:0009725	response to hormone	-2.4329	-0.154656	8/742	1645,1910,2852,4323,4824,6781,7043,84830	AKR1C1,EDNRB,GPER1,MMP14,NKX3-1,STC1,TGFB3,ADTRP
2_Member	GO Biological Processes	GO:1904951	positive regulation of establishment of protein localization	-2.39531	-0.132471	5/309	2852,3479,7043,22948,114899	GPER1,IGF1,TGFB3,CCT5,C1QTNF3
2_Member	GO Biological Processes	GO:0043255	regulation of carbohydrate biosynthetic process	-2.29784	-0.0760599	3/102	2852,3479,114899	GPER1,IGF1,C1QTNF3
2_Member	GO Biological Processes	GO:0031347	regulation of defense response	-2.18971	-0.0024393	7/648	1776,1910,2852,3479,7353,58515,114899	DNASE1L3,EDNRB,GPER1,IGF1,UFD1,SELENOK,C1QTNF3
2_Member	GO Biological Processes	GO:0010817	regulation of hormone levels	-2.1675	0	6/496	1645,1910,2852,4824,114899,133308	AKR1C1,EDNRB,GPER1,NKX3-1,C1QTNF3,SLC9B2
2_Member	GO Biological Processes	GO:0071407	cellular response to organic cyclic compound	-2.13489	0	6/504	1591,2852,3356,4824,6781,84830	CYP24A1,GPER1,HTR2A,NKX3-1,STC1,ADTRP
2_Member	GO Biological Processes	GO:0046883	regulation of hormone secretion	-2.10281	0	4/231	2852,4824,114899,133308	GPER1,NKX3-1,C1QTNF3,SLC9B2
2_Member	GO Biological Processes	GO:0046887	positive regulation of hormone secretion	-2.08347	0	3/122	2852,4824,114899	GPER1,NKX3-1,C1QTNF3
2_Member	GO Biological Processes	GO:0050678	regulation of epithelial cell proliferation	-2.02917	0	5/379	1910,3479,3791,4824,10344	EDNRB,IGF1,KDR,NKX3-1,CCL26
3_Summary	GO Biological Processes	GO:0055074	calcium ion homeostasis	-4.76425	-1.12903	9/435	794,1901,1910,2852,3356,3791,6781,22821,58515,114899,28232,388662,3790,133308,152078,83988	CALB2,S1PR1,EDNRB,GPER1,HTR2A,KDR,STC1,RASA3,SELENOK,C1QTNF3,SLCO3A1,SLC6A17,KCNS3,SLC9B2,SLC66A1L,NCALD
3_Member	GO Biological Processes	GO:0055074	calcium ion homeostasis	-4.76425	-1.12903	9/435	794,1901,1910,2852,3356,3791,6781,22821,58515	CALB2,S1PR1,EDNRB,GPER1,HTR2A,KDR,STC1,RASA3,SELENOK
3_Member	GO Biological Processes	GO:0072507	divalent inorganic cation homeostasis	-4.44432	-1.12903	9/478	794,1901,1910,2852,3356,3791,6781,22821,58515	CALB2,S1PR1,EDNRB,GPER1,HTR2A,KDR,STC1,RASA3,SELENOK
3_Member	GO Biological Processes	GO:0006874	cellular calcium ion homeostasis	-4.02368	-0.838076	8/422	794,1901,1910,2852,3356,6781,22821,58515	CALB2,S1PR1,EDNRB,GPER1,HTR2A,STC1,RASA3,SELENOK
3_Member	GO Biological Processes	GO:0072503	cellular divalent inorganic cation homeostasis	-3.79303	-0.770034	8/456	794,1901,1910,2852,3356,6781,22821,58515	CALB2,S1PR1,EDNRB,GPER1,HTR2A,STC1,RASA3,SELENOK
3_Member	GO Biological Processes	GO:0055065	metal ion homeostasis	-3.6013	-0.713517	9/618	794,1901,1910,2852,3356,3791,6781,22821,58515	CALB2,S1PR1,EDNRB,GPER1,HTR2A,KDR,STC1,RASA3,SELENOK
3_Member	GO Biological Processes	GO:0006875	cellular metal ion homeostasis	-3.24976	-0.550953	8/550	794,1901,1910,2852,3356,6781,22821,58515	CALB2,S1PR1,EDNRB,GPER1,HTR2A,STC1,RASA3,SELENOK
3_Member	GO Biological Processes	GO:0055080	cation homeostasis	-3.24551	-0.550953	9/692	794,1901,1910,2852,3356,3791,6781,22821,58515	CALB2,S1PR1,EDNRB,GPER1,HTR2A,KDR,STC1,RASA3,SELENOK
3_Member	GO Biological Processes	GO:0098771	inorganic ion homeostasis	-3.20112	-0.536737	9/702	794,1901,1910,2852,3356,3791,6781,22821,58515	CALB2,S1PR1,EDNRB,GPER1,HTR2A,KDR,STC1,RASA3,SELENOK
3_Member	GO Biological Processes	GO:0051480	regulation of cytosolic calcium ion concentration	-3.13963	-0.492968	6/316	794,1901,1910,2852,3356,22821	CALB2,S1PR1,EDNRB,GPER1,HTR2A,RASA3
3_Member	GO Biological Processes	GO:0055082	cellular chemical homeostasis	-3.01506	-0.425309	9/746	794,1901,1910,2852,3356,6781,22821,58515,114899	CALB2,S1PR1,EDNRB,GPER1,HTR2A,STC1,RASA3,SELENOK,C1QTNF3
3_Member	GO Biological Processes	GO:0050801	ion homeostasis	-2.98276	-0.413246	9/754	794,1901,1910,2852,3356,3791,6781,22821,58515	CALB2,S1PR1,EDNRB,GPER1,HTR2A,KDR,STC1,RASA3,SELENOK
3_Member	GO Biological Processes	GO:0030003	cellular cation homeostasis	-2.91469	-0.387721	8/620	794,1901,1910,2852,3356,6781,22821,58515	CALB2,S1PR1,EDNRB,GPER1,HTR2A,STC1,RASA3,SELENOK
3_Member	GO Biological Processes	GO:0006873	cellular ion homeostasis	-2.84908	-0.374658	8/635	794,1901,1910,2852,3356,6781,22821,58515	CALB2,S1PR1,EDNRB,GPER1,HTR2A,STC1,RASA3,SELENOK
3_Member	GO Biological Processes	GO:0003018	vascular process in circulatory system	-2.69512	-0.283989	5/263	1910,2852,3356,28232,388662	EDNRB,GPER1,HTR2A,SLCO3A1,SLC6A17
3_Member	GO Biological Processes	GO:0007204	positive regulation of cytosolic calcium ion concentration	-2.57093	-0.242339	5/281	1901,1910,2852,3356,22821	S1PR1,EDNRB,GPER1,HTR2A,RASA3
3_Member	GO Biological Processes	GO:0007200	phospholipase C-activating G protein-coupled receptor signaling pathway	-2.33396	-0.085245	3/99	1901,1910,3356	S1PR1,EDNRB,HTR2A
3_Member	GO Biological Processes	GO:0030001	metal ion transport	-2.32567	-0.0804097	7/611	1910,3356,3790,22821,58515,133308,388662	EDNRB,HTR2A,KCNS3,RASA3,SELENOK,SLC9B2,SLC6A17
3_Member	GO Biological Processes	GO:0098655	cation transmembrane transport	-2.21822	-0.0187179	7/640	1910,3356,3790,22821,133308,152078,388662	EDNRB,HTR2A,KCNS3,RASA3,SLC9B2,SLC66A1L,SLC6A17
3_Member	GO Biological Processes	GO:0003013	circulatory system process	-2.18405	0	6/492	1910,2852,3356,28232,83988,388662	EDNRB,GPER1,HTR2A,SLCO3A1,NCALD,SLC6A17
3_Member	GO Biological Processes	GO:0006816	calcium ion transport	-2.07722	0	4/235	1910,3356,22821,58515	EDNRB,HTR2A,RASA3,SELENOK
3_Member	GO Biological Processes	GO:0051282	regulation of sequestering of calcium ion	-2.06421	0	3/124	2852,3356,22821	GPER1,HTR2A,RASA3
4_Summary	GO Biological Processes	GO:0048568	embryonic organ development	-4.67899	-1.12903	9/446	3219,3791,4323,6615,7043,9423,10194,25861,144455	HOXB9,KDR,MMP14,SNAI1,TGFB3,NTN1,TSHZ1,WHRN,E2F7
4_Member	GO Biological Processes	GO:0048568	embryonic organ development	-4.67899	-1.12903	9/446	3219,3791,4323,6615,7043,9423,10194,25861,144455	HOXB9,KDR,MMP14,SNAI1,TGFB3,NTN1,TSHZ1,WHRN,E2F7
4_Member	GO Biological Processes	GO:0048562	embryonic organ morphogenesis	-3.31902	-0.550953	6/292	3219,4323,7043,9423,10194,25861	HOXB9,MMP14,TGFB3,NTN1,TSHZ1,WHRN
4_Member	GO Biological Processes	GO:0048598	embryonic morphogenesis	-2.46459	-0.172038	7/576	3219,4323,6615,7043,9423,10194,25861	HOXB9,MMP14,SNAI1,TGFB3,NTN1,TSHZ1,WHRN
4_Member	GO Biological Processes	GO:0048704	embryonic skeletal system morphogenesis	-2.39693	-0.132471	3/94	3219,4323,7043	HOXB9,MMP14,TGFB3
4_Member	GO Biological Processes	GO:0043583	ear development	-2.19666	-0.00637193	4/217	7043,9423,10194,25861	TGFB3,NTN1,TSHZ1,WHRN
4_Member	GO Biological Processes	GO:0042471	ear morphogenesis	-2.08347	0	3/122	9423,10194,25861	NTN1,TSHZ1,WHRN
4_Member	GO Biological Processes	GO:0030879	mammary gland development	-2.0738	0	3/123	3219,7043,9423	HOXB9,TGFB3,NTN1
4_Member	GO Biological Processes	GO:0048706	embryonic skeletal system development	-2.03597	0	3/127	3219,4323,7043	HOXB9,MMP14,TGFB3
5_Summary	GO Biological Processes	GO:2000147	positive regulation of cell motility	-4.53441	-1.12903	10/584	1901,2852,3479,3791,4323,6615,9423,10344,58515,152007,3356,2237,7043,22948,90427,220164	S1PR1,GPER1,IGF1,KDR,MMP14,SNAI1,NTN1,CCL26,SELENOK,GLIPR2,HTR2A,FEN1,TGFB3,CCT5,BMF,DOK6
5_Member	GO Biological Processes	GO:2000147	positive regulation of cell motility	-4.53441	-1.12903	10/584	1901,2852,3479,3791,4323,6615,9423,10344,58515,152007	S1PR1,GPER1,IGF1,KDR,MMP14,SNAI1,NTN1,CCL26,SELENOK,GLIPR2
5_Member	GO Biological Processes	GO:0051272	positive regulation of cellular component movement	-4.45987	-1.12903	10/596	1901,2852,3479,3791,4323,6615,9423,10344,58515,152007	S1PR1,GPER1,IGF1,KDR,MMP14,SNAI1,NTN1,CCL26,SELENOK,GLIPR2
5_Member	GO Biological Processes	GO:0040017	positive regulation of locomotion	-4.44152	-1.12903	10/599	1901,2852,3479,3791,4323,6615,9423,10344,58515,152007	S1PR1,GPER1,IGF1,KDR,MMP14,SNAI1,NTN1,CCL26,SELENOK,GLIPR2
5_Member	GO Biological Processes	GO:0070374	positive regulation of ERK1 and ERK2 cascade	-3.97958	-0.838076	6/220	2852,3356,3479,3791,10344,152007	GPER1,HTR2A,IGF1,KDR,CCL26,GLIPR2
5_Member	GO Biological Processes	GO:0030335	positive regulation of cell migration	-3.91936	-0.829	9/560	1901,2852,3479,3791,4323,6615,10344,58515,152007	S1PR1,GPER1,IGF1,KDR,MMP14,SNAI1,CCL26,SELENOK,GLIPR2
5_Member	GO Biological Processes	GO:0010638	positive regulation of organelle organization	-3.60592	-0.713517	8/486	2237,2852,3479,3791,7043,10344,22948,90427	FEN1,GPER1,IGF1,KDR,TGFB3,CCL26,CCT5,BMF
5_Member	GO Biological Processes	GO:0043410	positive regulation of MAPK cascade	-3.58202	-0.713517	8/490	2852,3356,3479,3791,7043,10344,152007,220164	GPER1,HTR2A,IGF1,KDR,TGFB3,CCL26,GLIPR2,DOK6
5_Member	GO Biological Processes	GO:0090199	regulation of release of cytochrome c from mitochondria	-3.29208	-0.550953	3/46	2852,3479,90427	GPER1,IGF1,BMF
5_Member	GO Biological Processes	GO:0070372	regulation of ERK1 and ERK2 cascade	-3.17566	-0.520228	6/311	2852,3356,3479,3791,10344,152007	GPER1,HTR2A,IGF1,KDR,CCL26,GLIPR2
5_Member	GO Biological Processes	GO:0010821	regulation of mitochondrion organization	-2.84522	-0.374658	4/143	2852,3479,3791,90427	GPER1,IGF1,KDR,BMF
5_Member	GO Biological Processes	GO:0010822	positive regulation of mitochondrion organization	-2.72539	-0.309178	3/72	2852,3791,90427	GPER1,KDR,BMF
5_Member	GO Biological Processes	GO:0043408	regulation of MAPK cascade	-2.64012	-0.268465	8/686	2852,3356,3479,3791,7043,10344,152007,220164	GPER1,HTR2A,IGF1,KDR,TGFB3,CCL26,GLIPR2,DOK6
6_Summary	GO Biological Processes	GO:0110053	regulation of actin filament organization	-4.43327	-1.12903	7/269	119,1901,6710,7043,10344,80206,81873,1910,2852,3356,9423,6781,3479,4323,25791,84830,90427	ADD2,S1PR1,SPTB,TGFB3,CCL26,FHOD3,ARPC5L,EDNRB,GPER1,HTR2A,NTN1,STC1,IGF1,MMP14,NGEF,ADTRP,BMF
6_Member	GO Biological Processes	GO:0110053	regulation of actin filament organization	-4.43327	-1.12903	7/269	119,1901,6710,7043,10344,80206,81873	ADD2,S1PR1,SPTB,TGFB3,CCL26,FHOD3,ARPC5L
6_Member	GO Biological Processes	GO:0090066	regulation of anatomical structure size	-4.38163	-1.11518	9/487	119,1910,2852,3356,6710,9423,10344,80206,81873	ADD2,EDNRB,GPER1,HTR2A,SPTB,NTN1,CCL26,FHOD3,ARPC5L
6_Member	GO Biological Processes	GO:0032970	regulation of actin filament-based process	-4.24616	-1.01447	8/392	119,1901,6710,6781,7043,10344,80206,81873	ADD2,S1PR1,SPTB,STC1,TGFB3,CCL26,FHOD3,ARPC5L
6_Member	GO Biological Processes	GO:0030833	regulation of actin filament polymerization	-3.95201	-0.836832	5/139	119,6710,10344,80206,81873	ADD2,SPTB,CCL26,FHOD3,ARPC5L
6_Member	GO Biological Processes	GO:0032956	regulation of actin cytoskeleton organization	-3.71394	-0.731501	7/351	119,1901,6710,7043,10344,80206,81873	ADD2,S1PR1,SPTB,TGFB3,CCL26,FHOD3,ARPC5L
6_Member	GO Biological Processes	GO:0008064	regulation of actin polymerization or depolymerization	-3.69191	-0.731501	5/158	119,6710,10344,80206,81873	ADD2,SPTB,CCL26,FHOD3,ARPC5L
6_Member	GO Biological Processes	GO:0030832	regulation of actin filament length	-3.67919	-0.731501	5/159	119,6710,10344,80206,81873	ADD2,SPTB,CCL26,FHOD3,ARPC5L
6_Member	GO Biological Processes	GO:1902903	regulation of supramolecular fiber organization	-3.53972	-0.68545	7/375	119,1901,6710,7043,10344,80206,81873	ADD2,S1PR1,SPTB,TGFB3,CCL26,FHOD3,ARPC5L
6_Member	GO Biological Processes	GO:0051129	negative regulation of cellular component organization	-3.28161	-0.550953	9/684	119,1901,3479,4323,6710,9423,25791,80206,84830	ADD2,S1PR1,IGF1,MMP14,SPTB,NTN1,NGEF,FHOD3,ADTRP
6_Member	GO Biological Processes	GO:0032271	regulation of protein polymerization	-3.21282	-0.539285	5/201	119,6710,10344,80206,81873	ADD2,SPTB,CCL26,FHOD3,ARPC5L
6_Member	GO Biological Processes	GO:0030837	negative regulation of actin filament polymerization	-2.95393	-0.407645	3/60	119,6710,80206	ADD2,SPTB,FHOD3
6_Member	GO Biological Processes	GO:0032535	regulation of cellular component size	-2.90483	-0.385275	6/351	119,6710,9423,10344,80206,81873	ADD2,SPTB,NTN1,CCL26,FHOD3,ARPC5L
6_Member	GO Biological Processes	GO:0051493	regulation of cytoskeleton organization	-2.68768	-0.283249	7/525	119,1901,6710,7043,10344,80206,81873	ADD2,S1PR1,SPTB,TGFB3,CCL26,FHOD3,ARPC5L
6_Member	GO Biological Processes	GO:0051494	negative regulation of cytoskeleton organization	-2.67695	-0.283249	4/159	119,1901,6710,80206	ADD2,S1PR1,SPTB,FHOD3
6_Member	GO Biological Processes	GO:0032272	negative regulation of protein polymerization	-2.67464	-0.283249	3/75	119,6710,80206	ADD2,SPTB,FHOD3
6_Member	GO Biological Processes	GO:1902904	negative regulation of supramolecular fiber organization	-2.63783	-0.268465	4/163	119,1901,6710,80206	ADD2,S1PR1,SPTB,FHOD3
6_Member	GO Biological Processes	GO:0043254	regulation of protein-containing complex assembly	-2.61394	-0.259533	6/401	119,6710,10344,80206,81873,90427	ADD2,SPTB,CCL26,FHOD3,ARPC5L,BMF
6_Member	GO Biological Processes	GO:0010639	negative regulation of organelle organization	-2.25388	-0.0488296	5/334	119,1901,3479,6710,80206	ADD2,S1PR1,IGF1,SPTB,FHOD3
7_Summary	GO Biological Processes	GO:0045446	endothelial cell differentiation	-3.86278	-0.795902	4/77	1901,1910,3791,6781,1645,25861,144455,3219,10344,658,9423,119	S1PR1,EDNRB,KDR,STC1,AKR1C1,WHRN,E2F7,HOXB9,CCL26,BMPR1B,NTN1,ADD2
7_Member	GO Biological Processes	GO:0045446	endothelial cell differentiation	-3.86278	-0.795902	4/77	1901,1910,3791,6781	S1PR1,EDNRB,KDR,STC1
7_Member	GO Biological Processes	GO:0003158	endothelium development	-3.58291	-0.713517	4/91	1901,1910,3791,6781	S1PR1,EDNRB,KDR,STC1
7_Member	GO Biological Processes	GO:0030855	epithelial cell differentiation	-2.57941	-0.242339	7/549	1645,1901,1910,3791,6781,25861,144455	AKR1C1,S1PR1,EDNRB,KDR,STC1,WHRN,E2F7
7_Member	GO Biological Processes	GO:0060326	cell chemotaxis	-2.26813	-0.0528355	4/207	1901,1910,3219,10344	S1PR1,EDNRB,HOXB9,CCL26
7_Member	GO Biological Processes	GO:0006935	chemotaxis	-2.12685	0	6/506	658,1901,1910,3219,9423,10344	BMPR1B,S1PR1,EDNRB,HOXB9,NTN1,CCL26
7_Member	GO Biological Processes	GO:0042330	taxis	-2.11088	0	6/510	658,1901,1910,3219,9423,10344	BMPR1B,S1PR1,EDNRB,HOXB9,NTN1,CCL26
7_Member	GO Biological Processes	GO:0050900	leukocyte migration	-2.09636	0	4/232	119,1901,1910,10344	ADD2,S1PR1,EDNRB,CCL26
8_Summary	GO Biological Processes	GO:0010721	negative regulation of cell development	-3.41978	-0.595882	5/181	1910,3479,5744,6993,9423,1300,4323,55054,2852,133308,1645,6615	EDNRB,IGF1,PTHLH,DYNLT1,NTN1,COL10A1,MMP14,ATG16L1,GPER1,SLC9B2,AKR1C1,SNAI1
8_Member	GO Biological Processes	GO:0010721	negative regulation of cell development	-3.41978	-0.595882	5/181	1910,3479,5744,6993,9423	EDNRB,IGF1,PTHLH,DYNLT1,NTN1
8_Member	WikiPathways	WP615	Senescence and autophagy in cancer	-3.2998	-0.550953	4/108	1300,3479,4323,55054	COL10A1,IGF1,MMP14,ATG16L1
8_Member	WikiPathways	WP474	Endochondral ossification	-2.85323	-0.374658	3/65	1300,3479,5744	COL10A1,IGF1,PTHLH
8_Member	WikiPathways	WP4808	Endochondral ossification with skeletal dysplasias	-2.85323	-0.374658	3/65	1300,3479,5744	COL10A1,IGF1,PTHLH
8_Member	GO Biological Processes	GO:0060284	regulation of cell development	-2.80729	-0.364042	7/500	1910,2852,3479,5744,6993,9423,133308	EDNRB,GPER1,IGF1,PTHLH,DYNLT1,NTN1,SLC9B2
8_Member	GO Biological Processes	GO:0034308	primary alcohol metabolic process	-2.38404	-0.124775	3/95	1645,1910,3479	AKR1C1,EDNRB,IGF1
8_Member	GO Biological Processes	GO:0045596	negative regulation of cell differentiation	-2.06371	0	7/685	1910,2852,3479,5744,6615,6993,9423	EDNRB,GPER1,IGF1,PTHLH,SNAI1,DYNLT1,NTN1
9_Summary	Reactome Gene Sets	R-HSA-1474244	Extracellular matrix organization	-3.2498	-0.550953	6/301	1300,3791,4319,4323,7043,283208,3479,10344,56667,114899	COL10A1,KDR,MMP10,MMP14,TGFB3,P4HA3,IGF1,CCL26,MUC13,C1QTNF3
9_Member	Reactome Gene Sets	R-HSA-1474244	Extracellular matrix organization	-3.2498	-0.550953	6/301	1300,3791,4319,4323,7043,283208	COL10A1,KDR,MMP10,MMP14,TGFB3,P4HA3
9_Member	Reactome Gene Sets	R-HSA-1442490	Collagen degradation	-2.87269	-0.374658	3/64	1300,4319,4323	COL10A1,MMP10,MMP14
9_Member	Canonical Pathways	M5885	NABA MATRISOME ASSOCIATED	-2.40153	-0.132471	8/751	3479,4319,4323,7043,10344,56667,114899,283208	IGF1,MMP10,MMP14,TGFB3,CCL26,MUC13,C1QTNF3,P4HA3
10_Summary	GO Biological Processes	GO:0051345	positive regulation of hydrolase activity	-3.1145	-0.49102	8/577	1901,2852,3356,4824,6004,10344,11033,25791,22821	S1PR1,GPER1,HTR2A,NKX3-1,RGS16,CCL26,ADAP1,NGEF,RASA3
10_Member	GO Biological Processes	GO:0051345	positive regulation of hydrolase activity	-3.1145	-0.49102	8/577	1901,2852,3356,4824,6004,10344,11033,25791	S1PR1,GPER1,HTR2A,NKX3-1,RGS16,CCL26,ADAP1,NGEF
10_Member	GO Biological Processes	GO:0043087	regulation of GTPase activity	-2.82461	-0.365469	6/364	1901,6004,10344,11033,22821,25791	S1PR1,RGS16,CCL26,ADAP1,RASA3,NGEF
10_Member	GO Biological Processes	GO:0043547	positive regulation of GTPase activity	-2.63182	-0.268465	5/272	1901,6004,10344,11033,25791	S1PR1,RGS16,CCL26,ADAP1,NGEF
11_Summary	GO Biological Processes	GO:0010718	positive regulation of epithelial to mesenchymal transition	-3.11109	-0.49102	3/53	6615,7043,152007,658,1901,3791,79605,10194	SNAI1,TGFB3,GLIPR2,BMPR1B,S1PR1,KDR,PGBD5,TSHZ1
11_Member	GO Biological Processes	GO:0010718	positive regulation of epithelial to mesenchymal transition	-3.11109	-0.49102	3/53	6615,7043,152007	SNAI1,TGFB3,GLIPR2
11_Member	GO Biological Processes	GO:0030500	regulation of bone mineralization	-2.57939	-0.242339	3/81	658,1901,7043	BMPR1B,S1PR1,TGFB3
11_Member	WikiPathways	WP4018	Clear cell renal cell carcinoma pathways	-2.4915	-0.183296	3/87	3791,7043,79605	KDR,TGFB3,PGBD5
11_Member	GO Biological Processes	GO:0060021	roof of mouth development	-2.43648	-0.154656	3/91	6615,7043,10194	SNAI1,TGFB3,TSHZ1
11_Member	GO Biological Processes	GO:0070167	regulation of biomineral tissue development	-2.30975	-0.0780628	3/101	658,1901,7043	BMPR1B,S1PR1,TGFB3
11_Member	GO Biological Processes	GO:0010717	regulation of epithelial to mesenchymal transition	-2.29784	-0.0760599	3/102	6615,7043,152007	SNAI1,TGFB3,GLIPR2
11_Member	GO Biological Processes	GO:0110149	regulation of biomineralization	-2.28605	-0.0675294	3/103	658,1901,7043	BMPR1B,S1PR1,TGFB3
11_Member	GO Biological Processes	GO:0030278	regulation of ossification	-2.12307	0	3/118	658,1901,7043	BMPR1B,S1PR1,TGFB3
12_Summary	GO Biological Processes	GO:0001525	angiogenesis	-3.10426	-0.49102	6/321	1901,3791,4323,6303,84830,144455,4824,9423	S1PR1,KDR,MMP14,SAT1,ADTRP,E2F7,NKX3-1,NTN1
12_Member	GO Biological Processes	GO:0001525	angiogenesis	-3.10426	-0.49102	6/321	1901,3791,4323,6303,84830,144455	S1PR1,KDR,MMP14,SAT1,ADTRP,E2F7
12_Member	GO Biological Processes	GO:0002040	sprouting angiogenesis	-2.97515	-0.413246	3/59	3791,84830,144455	KDR,ADTRP,E2F7
12_Member	GO Biological Processes	GO:0001568	blood vessel development	-2.79255	-0.355401	7/503	1901,3791,4323,4824,6303,84830,144455	S1PR1,KDR,MMP14,NKX3-1,SAT1,ADTRP,E2F7
12_Member	GO Biological Processes	GO:0035239	tube morphogenesis	-2.73994	-0.311189	8/661	1901,3791,4323,4824,6303,9423,84830,144455	S1PR1,KDR,MMP14,NKX3-1,SAT1,NTN1,ADTRP,E2F7
12_Member	GO Biological Processes	GO:0001944	vasculature development	-2.68305	-0.283249	7/526	1901,3791,4323,4824,6303,84830,144455	S1PR1,KDR,MMP14,NKX3-1,SAT1,ADTRP,E2F7
12_Member	GO Biological Processes	GO:0048514	blood vessel morphogenesis	-2.51983	-0.201549	6/419	1901,3791,4323,6303,84830,144455	S1PR1,KDR,MMP14,SAT1,ADTRP,E2F7
13_Summary	GO Biological Processes	GO:0001649	osteoblast differentiation	-2.97355	-0.413246	4/132	658,1591,5744,6615,4323	BMPR1B,CYP24A1,PTHLH,SNAI1,MMP14
13_Member	GO Biological Processes	GO:0001649	osteoblast differentiation	-2.97355	-0.413246	4/132	658,1591,5744,6615	BMPR1B,CYP24A1,PTHLH,SNAI1
13_Member	KEGG Pathway	hsa04928	Parathyroid hormone synthesis, secretion and action	-2.25144	-0.0488296	3/106	1591,4323,5744	CYP24A1,MMP14,PTHLH
14_Summary	GO Biological Processes	GO:0046942	carboxylic acid transport	-2.94241	-0.402958	5/231	1645,28232,94097,152078,388662	AKR1C1,SLCO3A1,SFXN5,SLC66A1L,SLC6A17
14_Member	GO Biological Processes	GO:0046942	carboxylic acid transport	-2.94241	-0.402958	5/231	1645,28232,94097,152078,388662	AKR1C1,SLCO3A1,SFXN5,SLC66A1L,SLC6A17
14_Member	GO Biological Processes	GO:0015711	organic anion transport	-2.37178	-0.119104	5/313	1645,28232,94097,152078,388662	AKR1C1,SLCO3A1,SFXN5,SLC66A1L,SLC6A17
14_Member	GO Biological Processes	GO:0006865	amino acid transport	-2.1332	0	3/117	94097,152078,388662	SFXN5,SLC66A1L,SLC6A17
15_Summary	GO Biological Processes	GO:0008277	regulation of G protein-coupled receptor signaling pathway	-2.91381	-0.387721	4/137	2852,5998,6004,6993,1901,1910,3356,5744,25791	GPER1,RGS3,RGS16,DYNLT1,S1PR1,EDNRB,HTR2A,PTHLH,NGEF
15_Member	GO Biological Processes	GO:0008277	regulation of G protein-coupled receptor signaling pathway	-2.91381	-0.387721	4/137	2852,5998,6004,6993	GPER1,RGS3,RGS16,DYNLT1
15_Member	Reactome Gene Sets	R-HSA-372790	Signaling by GPCR	-2.57114	-0.242339	8/704	1901,1910,2852,3356,5744,5998,6004,25791	S1PR1,EDNRB,GPER1,HTR2A,PTHLH,RGS3,RGS16,NGEF
15_Member	Reactome Gene Sets	R-HSA-388396	GPCR downstream signalling	-2.25821	-0.0492971	7/629	1910,2852,3356,5744,5998,6004,25791	EDNRB,GPER1,HTR2A,PTHLH,RGS3,RGS16,NGEF
15_Member	Reactome Gene Sets	R-HSA-416476	G alpha (q) signalling events	-2.20364	-0.0072278	4/216	1910,3356,5998,6004	EDNRB,HTR2A,RGS3,RGS16
16_Summary	GO Biological Processes	GO:0090305	nucleic acid phosphodiester bond hydrolysis	-2.73139	-0.310037	5/258	1776,2237,9156,64789,79605,79000,23594	DNASE1L3,FEN1,EXO1,EXO5,PGBD5,AUNIP,ORC6
16_Member	GO Biological Processes	GO:0090305	nucleic acid phosphodiester bond hydrolysis	-2.73139	-0.310037	5/258	1776,2237,9156,64789,79605	DNASE1L3,FEN1,EXO1,EXO5,PGBD5
16_Member	GO Biological Processes	GO:0006310	DNA recombination	-2.16914	0	4/221	2237,9156,79000,79605	FEN1,EXO1,AUNIP,PGBD5
16_Member	GO Biological Processes	GO:0006259	DNA metabolic process	-2.00569	0	7/703	1776,2237,9156,23594,64789,79000,79605	DNASE1L3,FEN1,EXO1,ORC6,EXO5,AUNIP,PGBD5
17_Summary	WikiPathways	WP4754	IL-18 signaling pathway	-2.58427	-0.242339	5/279	4323,6004,10194,10418,22821,2852,4824,9781	MMP14,RGS16,TSHZ1,SPON1,RASA3,GPER1,NKX3-1,RNF144A
17_Member	WikiPathways	WP4754	IL-18 signaling pathway	-2.58427	-0.242339	5/279	4323,6004,10194,10418,22821	MMP14,RGS16,TSHZ1,SPON1,RASA3
17_Member	GO Biological Processes	GO:0045862	positive regulation of proteolysis	-2.07616	0	5/369	2852,4323,4824,9781,10418	GPER1,MMP14,NKX3-1,RNF144A,SPON1
18_Summary	GO Biological Processes	GO:0006140	regulation of nucleotide metabolic process	-2.47749	-0.176697	3/88	978,3356,3479,3791,9781,55054,85407	CDA,HTR2A,IGF1,KDR,RNF144A,ATG16L1,NKD1
18_Member	GO Biological Processes	GO:0006140	regulation of nucleotide metabolic process	-2.47749	-0.176697	3/88	978,3356,3479	CDA,HTR2A,IGF1
18_Member	GO Biological Processes	GO:0009896	positive regulation of catabolic process	-2.13893	0	6/503	3356,3479,3791,9781,55054,85407	HTR2A,IGF1,KDR,RNF144A,ATG16L1,NKD1
19_Summary	KEGG Pathway	hsa04360	Axon guidance	-2.46573	-0.172038	4/182	658,5998,9423,25791	BMPR1B,RGS3,NTN1,NGEF
19_Member	KEGG Pathway	hsa04360	Axon guidance	-2.46573	-0.172038	4/182	658,5998,9423,25791	BMPR1B,RGS3,NTN1,NGEF
20_Summary	GO Biological Processes	GO:0051302	regulation of cell division	-2.4321	-0.154656	4/186	4824,7043,23594,144455,9423	NKX3-1,TGFB3,ORC6,E2F7,NTN1
20_Member	GO Biological Processes	GO:0051302	regulation of cell division	-2.4321	-0.154656	4/186	4824,7043,23594,144455	NKX3-1,TGFB3,ORC6,E2F7
20_Member	GO Biological Processes	GO:0022612	gland morphogenesis	-2.30975	-0.0780628	3/101	4824,7043,9423	NKX3-1,TGFB3,NTN1
