# Supplementary material for: Transcriptional profiling of Hutchinson-Gilford Progeria syndrome fibroblasts reveals deficits in mesenchymal stem cell commitment to differentiation related to early events in endochondral ossification
Source: eLife journal article supplement (doi:10.7554/elife.81290), 2022-12-29
Supplement: table2-data1 [file metascape_result.xlsx]

## Sheet: Annotation
MyList	Gene ID	Type	Tax ID	Homologene Gene ID	Homologene Gene Tax ID	Gene Symbol	Description	Biological Process (GO)	Kinase Class (UniProt)	Protein Function (Protein Atlas)	Subcellular Location (Protein Atlas)	Drug (DrugBank)	Canonical Pathways	Hallmark Gene Sets	M5885 NABA MATRISOME ASSOCIATED	WP98 Prostaglandin synthesis and re	GO:0009725 response to hormone	GO:0051272 positive regulation of cellula	GO:0090596 sensory organ morphogenesis	GO:0045596 negative regulation of cell di	GO:0051055 negative regulation of lipid b	GO:0007389 pattern specification process	GO:0002009 morphogenesis of an epithelium	R-HSA-6798695 Neutrophil degranulation	R-HSA-1474290 Collagen formation	GO:0045598 regulation of fat cell differe	GO:0048608 reproductive structure develop	GO:0032102 negative regulation of respons	GO:0010942 positive regulation of cell de	WP3286 Copper homeostasis	WP5087 Malignant pleural mesothelioma	R-HSA-449147 Signaling by Interleukins	GO:1901136 carbohydrate derivative catabo	R-HSA-6785807 Interleukin-4 and Interleukin-
DOK6	220164	symbol	H. sapiens	220164	H. sapiens	DOK6	docking protein 6	GO:0007169 transmembrane receptor protein tyrosine kinase signaling pathway;GO:0043410 positive regulation of MAPK cascade;GO:0007167 enzyme linked receptor protein signaling pathway		Predicted intracellular proteins	Cytosol;Focal adhesion sites (Approved)		(M82)PID RET PATHWAY		0.0	0.0	0.0	1.0	0.0	0.0	0.0	0.0	0.0	0.0	0.0	0.0	0.0	0.0	0.0	0.0	0.0	0.0	0.0	0.0
ABCB4	5244	symbol	H. sapiens	5244	H. sapiens	ABCB4	ATP binding cassette subfamily B member 4	GO:1901557 response to fenofibrate;GO:0061092 positive regulation of phospholipid translocation;GO:1903412 response to bile acid		Human disease related genes:Digestive system diseases:Liver diseases; ENZYME proteins; Disease related genes; Potential drug targets; Enzymes; Transporters:Primary Active Transporters; Predicted intracellular proteins	Actin filaments;Nucleoplasm;Plasma membrane (Approved); Additional: Focal adhesion sites			(M5949)HALLMARK PEROXISOME	0.0	1.0	1.0	0.0	0.0	0.0	0.0	0.0	0.0	0.0	0.0	0.0	0.0	0.0	0.0	0.0	0.0	0.0	0.0	0.0
KCNS3	3790	symbol	H. sapiens	3790	H. sapiens	KCNS3	potassium voltage-gated channel modifier subfamily S member 3	GO:0071805 potassium ion transmembrane transport;GO:0006813 potassium ion transport;GO:0051260 protein homooligomerization		Predicted intracellular proteins; Transporters:Transporter channels and pores; Voltage-gated ion channels:Voltage-Gated Potassium Channels	Cytosol (Supported); Additional: Golgi apparatus;Plasma membrane				0.0	0.0	0.0	0.0	0.0	0.0	0.0	0.0	0.0	0.0	0.0	0.0	0.0	0.0	0.0	0.0	0.0	0.0	0.0	0.0
ADD2	119	symbol	H. sapiens	119	H. sapiens	ADD2	adducin 2	GO:0051016 barbed-end actin filament capping;GO:0050901 leukocyte tethering or rolling;GO:0061756 leukocyte adhesion to vascular endothelial cell		Predicted intracellular proteins	Cytosol;Nucleoplasm (Approved); Additional: Plasma membrane			(M5945)HALLMARK HEME METABOLISM	0.0	0.0	0.0	0.0	0.0	1.0	0.0	0.0	0.0	0.0	0.0	0.0	0.0	0.0	0.0	0.0	0.0	0.0	0.0	0.0
FGF13	2258	symbol	H. sapiens	2258	H. sapiens	FGF13	fibroblast growth factor 13	GO:0045196 establishment or maintenance of neuroblast polarity;GO:0045200 establishment of neuroblast polarity;GO:0055059 asymmetric neuroblast division		Predicted intracellular proteins	Cytosol (Supported)		(M5883)NABA SECRETED FACTORS; (M5885)NABA MATRISOME ASSOCIATED; (M5889)NABA MATRISOME	(M5939)HALLMARK P53 PATHWAY	1.0	0.0	0.0	1.0	0.0	1.0	0.0	0.0	0.0	0.0	0.0	0.0	0.0	0.0	0.0	0.0	1.0	0.0	0.0	0.0
IL13RA2	3598	symbol	H. sapiens	3598	H. sapiens	IL13RA2	interleukin 13 receptor subunit alpha 2	GO:0043305 negative regulation of mast cell degranulation;GO:0033007 negative regulation of mast cell activation involved in immune response;GO:0002638 negative regulation of immunoglobulin production		CD markers; Cancer-related genes:Candidate cancer biomarkers	Cell Junctions;Plasma membrane (Approved); Additional: Nucleoplasm;Vesicles	AER001	(M28)PID IL4 2PATHWAY	(M5951)HALLMARK SPERMATOGENESIS	0.0	0.0	0.0	0.0	0.0	0.0	1.0	0.0	0.0	0.0	0.0	0.0	0.0	0.0	0.0	0.0	0.0	1.0	0.0	1.0
TSPAN11	441631	symbol	H. sapiens	441631	H. sapiens	TSPAN11	tetraspanin 11	GO:0016477 cell migration;GO:0048870 cell motility;GO:0051674 localization of cell			Vesicles (Approved)				0.0	0.0	0.0	0.0	0.0	0.0	0.0	0.0	0.0	0.0	0.0	0.0	0.0	0.0	0.0	0.0	0.0	0.0	0.0	0.0
FEZ1	9638	symbol	H. sapiens	9638	H. sapiens	FEZ1	fasciculation and elongation protein zeta 1	GO:0061880 regulation of anterograde axonal transport of mitochondrion;GO:0061881 positive regulation of anterograde axonal transport of mitochondrion;GO:1902513 regulation of organelle transport along microtubule		Predicted intracellular proteins	Cytosol;Microtubules (Approved)			(M5902)HALLMARK APOPTOSIS	0.0	0.0	0.0	1.0	0.0	1.0	0.0	0.0	0.0	0.0	0.0	0.0	0.0	0.0	0.0	0.0	0.0	0.0	0.0	0.0
CLGN	1047	symbol	H. sapiens	1047	H. sapiens	CLGN	calmegin	GO:0007339 binding of sperm to zona pellucida;GO:0035036 sperm-egg recognition;GO:0009988 cell-cell recognition		Predicted intracellular proteins	Endoplasmic reticulum (Supported)			(M5951)HALLMARK SPERMATOGENESIS	0.0	0.0	0.0	0.0	0.0	0.0	0.0	0.0	0.0	0.0	0.0	0.0	0.0	0.0	0.0	0.0	0.0	0.0	0.0	0.0
ATP8B4	79895	symbol	H. sapiens	79895	H. sapiens	ATP8B4	ATPase phospholipid transporting 8B4 (putative)	GO:0045332 phospholipid translocation;GO:0034204 lipid translocation;GO:0097035 regulation of membrane lipid distribution		Enzymes; ENZYME proteins; Predicted intracellular proteins	Nucleoplasm;Vesicles (Uncertain); Additional: Cytosol				0.0	0.0	0.0	0.0	0.0	0.0	0.0	0.0	0.0	1.0	0.0	0.0	0.0	0.0	0.0	0.0	0.0	0.0	0.0	0.0
AKR1C2	1646	symbol	H. sapiens	1646	H. sapiens	AKR1C2	aldo-keto reductase family 1 member C2	GO:0009753 response to jasmonic acid;GO:0071395 cellular response to jasmonic acid stimulus;GO:0071798 response to prostaglandin D		FDA approved drug targets:Small molecule drugs; Human disease related genes:Reproductive system diseases:Reproductive system diseases; ENZYME proteins:Oxidoreductases; Disease related genes; Enzymes; Predicted intracellular proteins	Cytosol;Nucleoplasm (Approved); Additional: Endoplasmic reticulum;Nucleoli fibrillar center	NADH; Ursodeoxycholic acid; Nicotinamide adenine dinucleotide phosphate; Chenodeoxycholic acid; Epitestosterone		(M5934)HALLMARK XENOBIOTIC METABOLISM	0.0	1.0	1.0	0.0	0.0	0.0	0.0	0.0	0.0	0.0	0.0	0.0	1.0	0.0	0.0	0.0	0.0	0.0	0.0	0.0
MMP12	4321	symbol	H. sapiens	4321	H. sapiens	MMP12	matrix metallopeptidase 12	GO:1904905 negative regulation of endothelial cell-matrix adhesion via fibronectin;GO:0060309 elastin catabolic process;GO:0060435 bronchiole development		Cancer-related genes:Candidate cancer biomarkers; ENZYME proteins:Hydrolases; Predicted secreted proteins; Peptidases:Metallopeptidases; Enzymes		Acetohydroxamic acid; Marimastat; CP-271485; PF-00356231; Batimastat; 2-[2-(1,3-Dioxo-1,3-Dihydro-2h-Isoindol-2-Yl)Ethyl]-4-(4'-Ethoxy-1,1'-Biphenyl-4-Yl)-4-Oxobutanoic Acid; AE-941; (1S,5S,7R)-N~7~-(BIPHENYL-4-YLMETHYL)-N~3~-HYDROXY-6,8-DIOXA-3-AZABICYCLO[3.2.1]OCTANE-3,7-DICARBOXAMIDE; N-(biphenyl-4-ylsulfonyl)-D-leucine; CGS-27023; N-(dibenzo[b,d]thiophen-3-ylsulfonyl)-L-valine; N-oxo-2-[(4-ph…	(M174)PID UPA UPAR PATHWAY; (M3468)NABA ECM REGULATORS; (M5885)NABA MATRISOME ASSOCIATED	(M5921)HALLMARK COMPLEMENT	1.0	0.0	0.0	1.0	1.0	0.0	0.0	0.0	1.0	0.0	0.0	1.0	0.0	1.0	0.0	0.0	0.0	0.0	1.0	0.0
CACNA1G	8913	symbol	H. sapiens	8913	H. sapiens	CACNA1G	calcium voltage-gated channel subunit alpha1 G	GO:0010045 response to nickel cation;GO:0086046 membrane depolarization during SA node cell action potential;GO:0086045 membrane depolarization during AV node cell action potential		Voltage-gated ion channels:Voltage-Gated Calcium Channels; FDA approved drug targets:Small molecule drugs; Human disease related genes:Nervous system diseases:Neurodegenerative diseases; Disease related genes		Trimethadione; Cinnarizine; Ethosuximide; Verapamil; Zonisamide; Nifedipine; Mibefradil; Flunarizine; Methsuximide; Cannabidiol; Trimebutine; Benidipine; Manidipine; Bioallethrin; Medical Cannabis; Nabiximols	(M223)PID BETA CATENIN NUC PATHWAY		0.0	0.0	0.0	0.0	0.0	0.0	0.0	0.0	1.0	0.0	0.0	0.0	0.0	0.0	0.0	1.0	0.0	0.0	0.0	0.0
BMF	90427	symbol	H. sapiens	90427	H. sapiens	BMF	Bcl2 modifying factor	GO:0043276 anoikis;GO:0090200 positive regulation of release of cytochrome c from mitochondria;GO:0090199 regulation of release of cytochrome c from mitochondria		Predicted intracellular proteins	Nucleoplasm (Approved)			(M5902)HALLMARK APOPTOSIS	0.0	0.0	0.0	0.0	0.0	0.0	1.0	0.0	0.0	0.0	0.0	0.0	0.0	0.0	1.0	0.0	0.0	0.0	0.0	0.0
COL23A1	91522	symbol	H. sapiens	91522	H. sapiens	COL23A1	collagen type XXIII alpha 1 chain	GO:0030198 extracellular matrix organization;GO:0043062 extracellular structure organization;GO:0045229 external encapsulating structure organization		Predicted intracellular proteins			(M3005)NABA COLLAGENS; (M5884)NABA CORE MATRISOME; (M5889)NABA MATRISOME		1.0	0.0	0.0	0.0	0.0	0.0	0.0	0.0	0.0	0.0	1.0	0.0	0.0	0.0	0.0	0.0	0.0	0.0	0.0	0.0
KDR	3791	symbol	H. sapiens	3791	H. sapiens	KDR	kinase insert domain receptor	GO:1904881 cellular response to hydrogen sulfide;GO:0048597 post-embryonic camera-type eye morphogenesis;GO:1904880 response to hydrogen sulfide	Tyr protein kinase family	Human disease related genes:Cardiovascular diseases:Vascular diseases; FDA approved drug targets:Small molecule drugs; CD markers; Cancer-related genes:Candidate cancer biomarkers; FDA approved drug targets:Biotech drugs; Kinases:Tyr protein kinases; Disease related genes; Enzymes; RAS pathway related proteins; ENZYME proteins:Transferases	Vesicles (Approved); Additional: Nuclear membrane	Sorafenib; Sunitinib; 1-{4-[4-Amino-6-(4-methoxyphenyl)furo[2,3-d]pyrimidin-5-yl]phenyl}-3-[2-fluoro-5-(trifluoromethyl)phenyl]urea; Cediranib; Vatalanib; XL999; TG-100801; XL820; CYC116; Ramucirumab; Pegdinetanib; RAF-265; ABT-869; IMC-1C11; Semaxanib; Pazopanib; Midostaurin; Axitinib; 4-[[2-[[4-chloro-3-(trifluoromethyl)phenyl]amino]-3H-benzimidazol-5-yl]oxy]-N-methyl-pyridine-2-carboxamide; N-…	(M137)PID VEGF VEGFR PATHWAY; (M103)PID S1P S1P1 PATHWAY; (M44)PID HIF2PATHWAY		1.0	0.0	0.0	1.0	1.0	1.0	1.0	0.0	1.0	0.0	0.0	0.0	1.0	1.0	0.0	1.0	1.0	0.0	0.0	0.0
C10orf11	83938	gene_synonym	H. sapiens	83938	H. sapiens	LRMDA	leucine rich melanocyte differentiation associated	GO:0030318 melanocyte differentiation;GO:0050931 pigment cell differentiation;GO:0048066 developmental pigmentation		Human disease related genes:Congenital disorders of metabolism:Congenital disorders of amino acid metabolism; Predicted intracellular proteins; Disease related genes	Nucleoplasm (Supported); Additional: Cytosol				0.0	0.0	0.0	0.0	0.0	0.0	0.0	0.0	0.0	0.0	0.0	0.0	0.0	0.0	0.0	0.0	0.0	0.0	0.0	0.0
SLC35F2	54733	symbol	H. sapiens	54733	H. sapiens	SLC35F2	solute carrier family 35 member F2	GO:0055085 transmembrane transport;GO:0006810 transport;GO:0051234 establishment of localization		Transporters:Electrochemical Potential-driven transporters	Golgi apparatus (Approved)				0.0	0.0	0.0	0.0	0.0	0.0	0.0	0.0	0.0	0.0	0.0	0.0	0.0	0.0	0.0	0.0	0.0	0.0	0.0	0.0
AKR1C1	1645	symbol	H. sapiens	1645	H. sapiens	AKR1C1	aldo-keto reductase family 1 member C1	GO:0009753 response to jasmonic acid;GO:0071395 cellular response to jasmonic acid stimulus;GO:0044597 daunorubicin metabolic process		Enzymes; Predicted intracellular proteins; ENZYME proteins:Oxidoreductases	Cytosol;Endoplasmic reticulum (Enhanced)	NADH; Salicylic acid; Acetylsalicylic acid; Nicotinamide adenine dinucleotide phosphate; Naringenin; 2-HYDROXY-3,5-DIIODOBENZOIC ACID; Epitestosterone; Hexestrol			0.0	1.0	1.0	0.0	0.0	0.0	0.0	0.0	0.0	0.0	0.0	0.0	1.0	0.0	0.0	0.0	0.0	0.0	0.0	0.0
ACSL5	51703	symbol	H. sapiens	51703	H. sapiens	ACSL5	acyl-CoA synthetase long chain family member 5	GO:0010747 positive regulation of long-chain fatty acid import across plasma membrane;GO:0140214 positive regulation of long-chain fatty acid import into cell;GO:0010746 regulation of long-chain fatty acid import across plasma membrane		Enzymes; ENZYME proteins:Ligase	Mitochondria (Supported); Additional: Nucleoplasm			(M5949)HALLMARK PEROXISOME; (M5948)HALLMARK BILE ACID METABOLISM; (M5935)HALLMARK FATTY ACID METABOLISM	0.0	1.0	0.0	0.0	0.0	0.0	0.0	0.0	0.0	0.0	0.0	0.0	0.0	0.0	0.0	0.0	0.0	0.0	0.0	0.0
SLC9B2	133308	symbol	H. sapiens	133308	H. sapiens	SLC9B2	solute carrier family 9 member B2	GO:2001206 positive regulation of osteoclast development;GO:2001204 regulation of osteoclast development;GO:0045672 positive regulation of osteoclast differentiation		Transporters:Electrochemical Potential-driven transporters	Cell Junctions;Nucleoplasm (Approved)				0.0	1.0	0.0	0.0	0.0	1.0	0.0	0.0	0.0	0.0	0.0	0.0	0.0	0.0	0.0	0.0	0.0	0.0	0.0	0.0
ITIH5	80760	symbol	H. sapiens	80760	H. sapiens	ITIH5	inter-alpha-trypsin inhibitor heavy chain 5	GO:0030212 hyaluronan metabolic process;GO:1903510 mucopolysaccharide metabolic process;GO:0030203 glycosaminoglycan metabolic process		Predicted secreted proteins; Predicted intracellular proteins	Golgi apparatus (Approved); Additional: Vesicles		(M3468)NABA ECM REGULATORS; (M5885)NABA MATRISOME ASSOCIATED; (M5889)NABA MATRISOME	(M5947)HALLMARK IL2 STAT5 SIGNALING; (M5905)HALLMARK ADIPOGENESIS	1.0	0.0	0.0	0.0	0.0	0.0	0.0	0.0	0.0	0.0	0.0	0.0	0.0	0.0	0.0	0.0	0.0	0.0	0.0	0.0
SFRP2	6423	symbol	H. sapiens	6423	H. sapiens	SFRP2	secreted frizzled related protein 2	GO:0061185 negative regulation of dermatome development;GO:2000040 regulation of planar cell polarity pathway involved in axis elongation;GO:2000041 negative regulation of planar cell polarity pathway involved in axis elongation		Predicted secreted proteins	Intermediate filaments (Approved)		(M5883)NABA SECRETED FACTORS; (M5885)NABA MATRISOME ASSOCIATED; (M5889)NABA MATRISOME		1.0	0.0	0.0	1.0	0.0	1.0	0.0	1.0	1.0	0.0	0.0	1.0	1.0	1.0	1.0	0.0	1.0	0.0	0.0	0.0
STC1	6781	symbol	H. sapiens	6781	H. sapiens	STC1	stanniocalcin 1	GO:0003421 growth plate cartilage axis specification;GO:1903402 regulation of renal phosphate excretion;GO:1903403 negative regulation of renal phosphate excretion		Predicted secreted proteins; Predicted intracellular proteins				(M5944)HALLMARK ANGIOGENESIS; (M5891)HALLMARK HYPOXIA; (M5924)HALLMARK MTORC1 SIGNALING	0.0	0.0	1.0	1.0	0.0	1.0	0.0	1.0	1.0	0.0	0.0	0.0	1.0	0.0	0.0	0.0	0.0	0.0	0.0	0.0
C2	717	symbol	H. sapiens	717	H. sapiens	C2	complement C2	GO:2000427 positive regulation of apoptotic cell clearance;GO:2000425 regulation of apoptotic cell clearance;GO:0097066 response to thyroid hormone		Human disease related genes:Immune system diseases:Primary immunodeficiency; Human disease related genes:Immune system diseases:Allergies and autoimmune diseases; ENZYME proteins:Hydrolases; Predicted secreted proteins; Human disease related genes:Nervous system diseases:Eye disease; Disease related genes; Potential drug targets; Enzymes; Predicted intracellular proteins; Peptidases:Serine-type p…				(M5946)HALLMARK COAGULATION; (M5921)HALLMARK COMPLEMENT; (M5950)HALLMARK ALLOGRAFT REJECTION	0.0	0.0	1.0	0.0	0.0	0.0	0.0	0.0	0.0	0.0	0.0	0.0	0.0	0.0	0.0	0.0	0.0	0.0	0.0	0.0
CLK1	1195	symbol	H. sapiens	1195	H. sapiens	CLK1	CDC like kinase 1	GO:0018107 peptidyl-threonine phosphorylation;GO:0018210 peptidyl-threonine modification;GO:0018108 peptidyl-tyrosine phosphorylation	CMGC Ser/Thr protein kinase family	Enzymes; Kinases:CMGC Ser/Thr protein kinases; Predicted intracellular proteins; ENZYME proteins:Transferases	Nuclear membrane;Nucleoplasm (Supported)	Debromohymenialdisine; CHGN111; ethyl 3-[(E)-2-amino-1-cyanoethenyl]-6,7-dichloro-1-methyl-1H-indole-2-carboxylate; Fostamatinib			0.0	0.0	0.0	0.0	0.0	0.0	0.0	0.0	0.0	0.0	0.0	0.0	0.0	0.0	0.0	0.0	0.0	0.0	0.0	0.0
C1QTNF1	114897	symbol	H. sapiens	114897	H. sapiens	C1QTNF1	C1q and TNF related 1	GO:2000857 positive regulation of mineralocorticoid secretion;GO:2000860 positive regulation of aldosterone secretion;GO:2000855 regulation of mineralocorticoid secretion		Predicted secreted proteins; Predicted intracellular proteins	Cytosol;Nucleoplasm (Approved)		(M5880)NABA ECM AFFILIATED; (M5885)NABA MATRISOME ASSOCIATED; (M5889)NABA MATRISOME		1.0	1.0	0.0	1.0	0.0	0.0	1.0	0.0	0.0	0.0	0.0	0.0	0.0	1.0	0.0	0.0	0.0	0.0	0.0	0.0
ALDH1A3	220	symbol	H. sapiens	220	H. sapiens	ALDH1A3	aldehyde dehydrogenase 1 family member A3	GO:0021768 nucleus accumbens development;GO:0060166 olfactory pit development;GO:0070384 Harderian gland development		Human disease related genes:Congenital malformations:Congenital malformations of eye; ENZYME proteins:Oxidoreductases; Disease related genes; Potential drug targets; Enzymes; Predicted intracellular proteins	Nucleoplasm (Supported); Additional: Cytosol	NADH; Vitamin A		(M5908)HALLMARK ANDROGEN RESPONSE; (M5953)HALLMARK KRAS SIGNALING UP	0.0	1.0	0.0	0.0	1.0	0.0	0.0	1.0	1.0	0.0	0.0	0.0	0.0	0.0	1.0	0.0	0.0	0.0	0.0	0.0
CPNE8	144402	symbol	H. sapiens	144402	H. sapiens	CPNE8	copine 8	GO:0071277 cellular response to calcium ion;GO:0051592 response to calcium ion;GO:0071248 cellular response to metal ion		Predicted intracellular proteins					0.0	0.0	0.0	0.0	0.0	0.0	0.0	0.0	0.0	0.0	0.0	0.0	0.0	0.0	0.0	1.0	0.0	0.0	0.0	0.0
LINC00856	100132987	symbol	H. sapiens	100132987	H. sapiens	LINC00856	long intergenic non-protein coding RNA 856								0.0	0.0	0.0	0.0	0.0	0.0	0.0	0.0	0.0	0.0	0.0	0.0	0.0	0.0	0.0	0.0	0.0	0.0	0.0	0.0
SYBU	55638	symbol	H. sapiens	55638	H. sapiens	SYBU	syntabulin	GO:0060074 synapse maturation;GO:0019896 axonal transport of mitochondrion;GO:0034643 establishment of mitochondrion localization, microtubule-mediated		Predicted intracellular proteins	Vesicles (Supported)			(M5906)HALLMARK ESTROGEN RESPONSE EARLY	0.0	0.0	0.0	0.0	0.0	0.0	0.0	0.0	0.0	0.0	0.0	0.0	0.0	0.0	0.0	0.0	0.0	0.0	0.0	0.0
SEMA4D	10507	symbol	H. sapiens	10507	H. sapiens	SEMA4D	semaphorin 4D	GO:1900220 semaphorin-plexin signaling pathway involved in bone trabecula morphogenesis;GO:1905704 positive regulation of inhibitory synapse assembly;GO:0010693 negative regulation of alkaline phosphatase activity		Predicted intracellular proteins; CD markers			(M5880)NABA ECM AFFILIATED; (M5885)NABA MATRISOME ASSOCIATED; (M5889)NABA MATRISOME	(M5932)HALLMARK INFLAMMATORY RESPONSE	1.0	0.0	0.0	1.0	0.0	1.0	1.0	0.0	0.0	0.0	0.0	0.0	1.0	1.0	0.0	0.0	0.0	0.0	0.0	0.0
SORCS2	57537	symbol	H. sapiens	57537	H. sapiens	SORCS2	sortilin related VPS10 domain containing receptor 2	GO:0060292 long-term synaptic depression;GO:0050805 negative regulation of synaptic transmission;GO:0007218 neuropeptide signaling pathway			Cytosol;Vesicles (Approved)				0.0	0.0	0.0	0.0	0.0	0.0	0.0	0.0	0.0	0.0	0.0	0.0	0.0	0.0	0.0	0.0	0.0	0.0	0.0	0.0
CASP10	843	symbol	H. sapiens	843	H. sapiens	CASP10	caspase 10	GO:0097194 execution phase of apoptosis;GO:0006919 activation of cysteine-type endopeptidase activity involved in apoptotic process;GO:0043280 positive regulation of cysteine-type endopeptidase activity involved in apoptotic process		Human disease related genes:Immune system diseases:Primary immunodeficiency; Cancer-related genes:Candidate cancer biomarkers; ENZYME proteins:Hydrolases; Peptidases:Cysteine-type peptidases; Disease related genes; Potential drug targets; Enzymes; Predicted intracellular proteins	Golgi apparatus (Approved); Additional: Vesicles		(M7997)SA CASPASE CASCADE; (M79)PID TRAIL PATHWAY; (M94)PID FAS PATHWAY	(M5921)HALLMARK COMPLEMENT	0.0	0.0	0.0	0.0	0.0	0.0	0.0	0.0	0.0	0.0	0.0	0.0	0.0	0.0	0.0	0.0	0.0	0.0	0.0	0.0
RNF144A	9781	symbol	H. sapiens	9781	H. sapiens	RNF144A	ring finger protein 144A	GO:0032436 positive regulation of proteasomal ubiquitin-dependent protein catabolic process;GO:2000060 positive regulation of ubiquitin-dependent protein catabolic process;GO:1901800 positive regulation of proteasomal protein catabolic process		Enzymes; Predicted intracellular proteins; ENZYME proteins:Transferases	Vesicles (Supported)				0.0	0.0	0.0	0.0	0.0	0.0	0.0	0.0	0.0	0.0	0.0	0.0	0.0	0.0	0.0	0.0	0.0	0.0	0.0	0.0
HIP1	3092	symbol	H. sapiens	3092	H. sapiens	HIP1	huntingtin interacting protein 1	GO:2000588 positive regulation of platelet-derived growth factor receptor-beta signaling pathway;GO:0010641 positive regulation of platelet-derived growth factor receptor signaling pathway;GO:2000586 regulation of platelet-derived growth factor receptor-beta signaling pathway		Predicted intracellular proteins; Cancer-related genes; Disease related genes	Vesicles (Supported)		(M58)PID AR PATHWAY		0.0	1.0	0.0	0.0	0.0	0.0	0.0	0.0	0.0	0.0	0.0	0.0	0.0	0.0	0.0	0.0	0.0	0.0	0.0	0.0
SGCG	6445	symbol	H. sapiens	6445	H. sapiens	SGCG	sarcoglycan gamma	GO:0060047 heart contraction;GO:0003015 heart process;GO:0048738 cardiac muscle tissue development		Human disease related genes:Musculoskeletal diseases:Muscular diseases; Disease related genes				(M5909)HALLMARK MYOGENESIS; (M5930)HALLMARK EPITHELIAL MESENCHYMAL TRANSITION	0.0	0.0	0.0	0.0	0.0	0.0	0.0	0.0	1.0	0.0	0.0	0.0	0.0	0.0	0.0	0.0	0.0	0.0	0.0	0.0
B3GLCT	145173	symbol	H. sapiens	145173	H. sapiens	B3GLCT	beta 3-glucosyltransferase	GO:0036066 protein O-linked fucosylation;GO:0006004 fucose metabolic process;GO:0036065 fucosylation		Human disease related genes:Congenital malformations:Congenital malformations of eye; Predicted intracellular proteins; Disease related genes					0.0	0.0	0.0	0.0	0.0	0.0	0.0	0.0	0.0	0.0	0.0	0.0	0.0	0.0	0.0	0.0	0.0	0.0	0.0	0.0
HECW1	23072	symbol	H. sapiens	23072	H. sapiens	HECW1	HECT, C2 and WW domain containing E3 ubiquitin protein ligase 1	GO:2000650 negative regulation of sodium ion transmembrane transporter activity;GO:1902306 negative regulation of sodium ion transmembrane transport;GO:0010766 negative regulation of sodium ion transport		Enzymes; Predicted intracellular proteins; ENZYME proteins:Transferases	Cytosol (Supported)				0.0	0.0	0.0	0.0	0.0	1.0	0.0	1.0	0.0	0.0	0.0	0.0	0.0	0.0	0.0	0.0	0.0	0.0	0.0	0.0
MMP3	4314	symbol	H. sapiens	4314	H. sapiens	MMP3	matrix metallopeptidase 3	GO:0010727 negative regulation of hydrogen peroxide metabolic process;GO:0071492 cellular response to UV-A;GO:0070141 response to UV-A		Human disease related genes:Cardiovascular diseases:Vascular diseases; Candidate cardiovascular disease genes; Cancer-related genes:Candidate cancer biomarkers; ENZYME proteins:Hydrolases; Predicted secreted proteins; Peptidases:Metallopeptidases; Disease related genes; Potential drug targets; Enzymes; Predicted intracellular proteins	Vesicles (Supported)	Marimastat; N-Hydroxy 1n(4-Methoxyphenyl)Sulfonyl-4-(Z,E-N-Methoxyimino)Pyrrolidine-2r-Carboxamide; 3-Methylpyridine; A Disubstituted Succinyl Caprolactam Hydroxymate Mmp3inhibitor; N-Hydroxy-4-[(4-Methoxylphenyl)Sulfonyl]-2,2-Dimethyl-Hexahydro-1,4-Thiazepine-3(S)-Carboxamide; (1n)-4-N-Butoxyphenylsulfonyl-(2r)-N-Hydroxycarboxamido-(4s)-Methanesulfonylamino-Pyrrolidine; 3-(1h-Indol-3-Yl)-2-[4-(4…	(M174)PID UPA UPAR PATHWAY; (M142)PID AJDISS 2PATHWAY; (M153)PID P75 NTR PATHWAY	(M5946)HALLMARK COAGULATION; (M5930)HALLMARK EPITHELIAL MESENCHYMAL TRANSITION	1.0	1.0	0.0	0.0	0.0	0.0	0.0	0.0	0.0	0.0	1.0	1.0	0.0	0.0	1.0	1.0	1.0	1.0	0.0	1.0
CCIN	881	symbol	H. sapiens	881	H. sapiens	CCIN	calicin	GO:0030036 actin cytoskeleton organization;GO:0007283 spermatogenesis;GO:0048232 male gamete generation		Predicted intracellular proteins					0.0	0.0	0.0	0.0	0.0	0.0	0.0	0.0	0.0	0.0	0.0	0.0	0.0	0.0	0.0	0.0	0.0	0.0	0.0	0.0
TAF4B	6875	symbol	H. sapiens	6875	H. sapiens	TAF4B	TATA-box binding protein associated factor 4b	GO:0042789 mRNA transcription by RNA polymerase II;GO:0009299 mRNA transcription;GO:0060261 positive regulation of transcription initiation from RNA polymerase II promoter		Predicted intracellular proteins; Disease related genes; Human disease related genes:Reproductive system diseases:Reproductive system diseases	Nucleoplasm (Supported); Additional: Nucleoli fibrillar center		(M66)PID MYC ACTIV PATHWAY		0.0	0.0	0.0	0.0	0.0	0.0	0.0	0.0	0.0	0.0	0.0	0.0	0.0	0.0	0.0	0.0	0.0	0.0	0.0	0.0
COL13A1	1305	symbol	H. sapiens	1305	H. sapiens	COL13A1	collagen type XIII alpha 1 chain	GO:0030903 notochord development;GO:0001958 endochondral ossification;GO:0036075 replacement ossification		Predicted intracellular proteins; Disease related genes; Human disease related genes:Nervous system diseases:Other nervous and sensory system diseases			(M3005)NABA COLLAGENS; (M198)PID SYNDECAN 1 PATHWAY; (M160)PID AVB3 INTEGRIN PATHWAY		1.0	0.0	0.0	0.0	1.0	0.0	0.0	0.0	1.0	0.0	1.0	0.0	1.0	0.0	0.0	0.0	0.0	0.0	0.0	0.0
LINC00673	100499467	symbol	H. sapiens	100499467	H. sapiens	LINC00673	long intergenic non-protein coding RNA 673								0.0	0.0	0.0	0.0	0.0	0.0	0.0	0.0	0.0	0.0	0.0	0.0	0.0	0.0	0.0	0.0	0.0	0.0	0.0	0.0
GPER1	2852	symbol	H. sapiens	2852	H. sapiens	GPER1	G protein-coupled estrogen receptor 1	GO:0030264 nuclear fragmentation involved in apoptotic nuclear change;GO:2000724 positive regulation of cardiac vascular smooth muscle cell differentiation;GO:0030263 apoptotic chromosome condensation		G-protein coupled receptors:GPCRs excl olfactory receptors; Transporters; Predicted intracellular proteins	Nucleoli (Approved); Additional: Cytosol;Nucleoplasm;Vesicles	Estradiol; Genistein; MK-0354; Estradiol acetate; Estradiol benzoate; Estradiol cypionate; Estradiol dienanthate; Estradiol valerate		(M5907)HALLMARK ESTROGEN RESPONSE LATE	1.0	1.0	1.0	1.0	0.0	1.0	1.0	0.0	0.0	0.0	0.0	1.0	0.0	1.0	1.0	0.0	0.0	0.0	0.0	0.0
MAML3	55534	symbol	H. sapiens	55534	H. sapiens	MAML3	mastermind like transcriptional coactivator 3	GO:0007221 positive regulation of transcription of Notch receptor target;GO:0007219 Notch signaling pathway;GO:0045944 positive regulation of transcription by RNA polymerase II		Predicted intracellular proteins	Nuclear speckles (Supported)				0.0	0.0	0.0	0.0	0.0	0.0	0.0	0.0	0.0	0.0	0.0	0.0	0.0	0.0	0.0	0.0	0.0	0.0	0.0	0.0
PHACTR1	221692	symbol	H. sapiens	221692	H. sapiens	PHACTR1	phosphatase and actin regulator 1	GO:0140059 dendrite arborization;GO:0140058 neuron projection arborization;GO:0030038 contractile actin filament bundle assembly		Human disease related genes:Nervous system diseases:Epilepsy; Predicted intracellular proteins; Disease related genes	Plasma membrane (Uncertain)				0.0	0.0	0.0	0.0	0.0	1.0	0.0	0.0	0.0	0.0	0.0	0.0	0.0	0.0	0.0	0.0	0.0	0.0	0.0	0.0
IQCK	124152	symbol	H. sapiens	124152	H. sapiens	IQCK	IQ motif containing K			Predicted intracellular proteins	Nuclear speckles (Approved); Additional: Cytosol				0.0	0.0	0.0	0.0	0.0	0.0	0.0	0.0	0.0	0.0	0.0	0.0	0.0	0.0	0.0	0.0	0.0	0.0	0.0	0.0
ZNF536	9745	symbol	H. sapiens	9745	H. sapiens	ZNF536	zinc finger protein 536	GO:0048387 negative regulation of retinoic acid receptor signaling pathway;GO:0048385 regulation of retinoic acid receptor signaling pathway;GO:0045665 negative regulation of neuron differentiation		Predicted intracellular proteins; Transcription factors:Zinc-coordinating DNA-binding domains	Cell Junctions;Nucleoplasm (Approved)				0.0	1.0	0.0	0.0	0.0	1.0	0.0	0.0	0.0	0.0	0.0	0.0	0.0	0.0	0.0	0.0	0.0	0.0	0.0	0.0
DIRAS3	9077	symbol	H. sapiens	9077	H. sapiens	DIRAS3	DIRAS family GTPase 3	GO:0006349 regulation of gene expression by genetic imprinting;GO:0071514 genetic imprinting;GO:0000079 regulation of cyclin-dependent protein serine/threonine kinase activity		Predicted intracellular proteins	Cytosol;Nuclear membrane (Approved)				0.0	0.0	0.0	0.0	0.0	0.0	0.0	0.0	0.0	0.0	0.0	0.0	0.0	0.0	0.0	0.0	0.0	0.0	0.0	0.0
IL21-AS1	100996941	symbol	H. sapiens	100996941	H. sapiens	IL21-AS1	IL21 antisense RNA 1								0.0	0.0	0.0	0.0	0.0	0.0	0.0	0.0	0.0	0.0	0.0	0.0	0.0	0.0	0.0	0.0	0.0	0.0	0.0	0.0
LINC00702	100652988	symbol	H. sapiens	100652988	H. sapiens	LINC00702	long intergenic non-protein coding RNA 702								0.0	0.0	0.0	0.0	0.0	0.0	0.0	0.0	0.0	0.0	0.0	0.0	0.0	0.0	0.0	0.0	0.0	0.0	0.0	0.0
SNAI1	6615	symbol	H. sapiens	6615	H. sapiens	SNAI1	snail family transcriptional repressor 1	GO:0060806 negative regulation of cell differentiation involved in embryonic placenta development;GO:0060800 regulation of cell differentiation involved in embryonic placenta development;GO:0010957 negative regulation of vitamin D biosynthetic process		Predicted intracellular proteins; Transcription factors:Zinc-coordinating DNA-binding domains	Nucleoplasm (Supported)		(M71)PID ILK PATHWAY; (M48)PID MET PATHWAY; (M66)PID MYC ACTIV PATHWAY		0.0	0.0	0.0	1.0	1.0	1.0	1.0	1.0	1.0	0.0	0.0	0.0	1.0	0.0	0.0	0.0	0.0	0.0	0.0	0.0
P4HA3	283208	symbol	H. sapiens	283208	H. sapiens	P4HA3	prolyl 4-hydroxylase subunit alpha 3	GO:0018401 peptidyl-proline hydroxylation to 4-hydroxy-L-proline;GO:0019511 peptidyl-proline hydroxylation;GO:0018126 protein hydroxylation		Enzymes; Predicted intracellular proteins; ENZYME proteins:Oxidoreductases			(M3468)NABA ECM REGULATORS; (M5885)NABA MATRISOME ASSOCIATED; (M5889)NABA MATRISOME		1.0	0.0	0.0	0.0	0.0	0.0	0.0	0.0	0.0	0.0	1.0	0.0	0.0	0.0	0.0	0.0	0.0	0.0	0.0	0.0
PDK4	5166	symbol	H. sapiens	5166	H. sapiens	PDK4	pyruvate dehydrogenase kinase 4	GO:0010510 regulation of acetyl-CoA biosynthetic process from pyruvate;GO:0050812 regulation of acyl-CoA biosynthetic process;GO:0042762 regulation of sulfur metabolic process	Atypical: PDK/BCKDK protein kinase family	Enzymes; Predicted intracellular proteins; Kinases:Atypical kinases; ENZYME proteins:Transferases		Tretinoin; 4-[4-(4-methoxyphenyl)-5-methyl-1H-pyrazol-3-yl]benzene-1,3-diol		(M5934)HALLMARK XENOBIOTIC METABOLISM; (M5936)HALLMARK OXIDATIVE PHOSPHORYLATION	0.0	1.0	1.0	1.0	0.0	0.0	1.0	0.0	0.0	0.0	0.0	1.0	0.0	0.0	0.0	0.0	0.0	0.0	0.0	0.0
SH3KBP1	30011	symbol	H. sapiens	30011	H. sapiens	SH3KBP1	SH3 domain containing kinase binding protein 1	GO:0008360 regulation of cell shape;GO:0050871 positive regulation of B cell activation;GO:0050864 regulation of B cell activation		Predicted intracellular proteins; Disease related genes	Cytosol (Supported)		(M214)PID ERBB1 INTERNALIZATION PATHWAY; (M48)PID MET PATHWAY		0.0	0.0	0.0	0.0	0.0	0.0	1.0	0.0	0.0	0.0	0.0	0.0	0.0	0.0	0.0	0.0	0.0	0.0	0.0	0.0
TNFAIP2	7127	symbol	H. sapiens	7127	H. sapiens	TNFAIP2	TNF alpha induced protein 2	GO:0051601 exocyst localization;GO:0031503 protein-containing complex localization;GO:0006887 exocytosis		Transporters:Transporter channels and pores; Predicted intracellular proteins; Cancer-related genes:Candidate cancer biomarkers	Cytosol;Golgi apparatus (Approved); Additional: Nuclear membrane;Nucleoplasm			(M5890)HALLMARK TNFA SIGNALING VIA NFKB; (M5913)HALLMARK INTERFERON GAMMA RESPONSE	0.0	0.0	0.0	0.0	0.0	0.0	0.0	0.0	1.0	0.0	0.0	0.0	0.0	0.0	0.0	0.0	0.0	0.0	0.0	0.0
CTAGE5	4253	gene_synonym	H. sapiens	4253	H. sapiens	MIA2	MIA SH3 domain ER export factor 2	GO:0035459 vesicle cargo loading;GO:0009306 protein secretion;GO:0035592 establishment of protein localization to extracellular region		Transporters; Predicted intracellular proteins; Disease related genes; Potential drug targets	Endoplasmic reticulum (Supported)				0.0	0.0	0.0	0.0	0.0	0.0	0.0	0.0	0.0	0.0	0.0	0.0	0.0	0.0	0.0	0.0	0.0	0.0	0.0	0.0
MOCOS	55034	symbol	H. sapiens	55034	H. sapiens	MOCOS	molybdenum cofactor sulfurase	GO:0032324 molybdopterin cofactor biosynthetic process;GO:0006777 Mo-molybdopterin cofactor biosynthetic process;GO:0019720 Mo-molybdopterin cofactor metabolic process		Human disease related genes:Congenital disorders of metabolism:Congenital disorders of nucleotide metabolism; Disease related genes; Potential drug targets; Enzymes; Predicted intracellular proteins; ENZYME proteins:Transferases	Mitochondria (Supported); Additional: Cytosol	Pyridoxal phosphate		(M5945)HALLMARK HEME METABOLISM	0.0	0.0	0.0	0.0	0.0	0.0	0.0	0.0	0.0	0.0	0.0	0.0	0.0	0.0	0.0	0.0	0.0	0.0	0.0	0.0
CCL26	10344	symbol	H. sapiens	10344	H. sapiens	CCL26	C-C motif chemokine ligand 26	GO:0010818 T cell chemotaxis;GO:0048245 eosinophil chemotaxis;GO:0072677 eosinophil migration		Predicted secreted proteins; Human disease related genes:Immune system diseases:Allergies and autoimmune diseases			(M28)PID IL4 2PATHWAY; (M5883)NABA SECRETED FACTORS; (M5885)NABA MATRISOME ASSOCIATED		1.0	0.0	0.0	1.0	0.0	1.0	0.0	0.0	0.0	0.0	0.0	0.0	0.0	0.0	0.0	0.0	0.0	1.0	0.0	0.0
RPGRIP1L	23322	symbol	H. sapiens	23322	H. sapiens	RPGRIP1L	RPGRIP1 like	GO:0046548 retinal rod cell development;GO:0060221 retinal rod cell differentiation;GO:0021670 lateral ventricle development		Human disease related genes:Congenital malformations:Congenital malformations of the nervous system; Predicted intracellular proteins; Disease related genes; Human disease related genes:Congenital malformations:Congenital malformations of the urinary system	Cytosol;Plasma membrane (Approved)				0.0	0.0	0.0	0.0	1.0	0.0	0.0	1.0	1.0	0.0	0.0	0.0	0.0	0.0	0.0	0.0	0.0	0.0	0.0	0.0
STXBP5-AS1	729178	symbol	H. sapiens	729178	H. sapiens	STXBP5-AS1	STXBP5 antisense RNA 1								0.0	0.0	0.0	0.0	0.0	0.0	0.0	0.0	0.0	0.0	0.0	0.0	0.0	0.0	0.0	0.0	0.0	0.0	0.0	0.0
PAMR1	25891	symbol	H. sapiens	25891	H. sapiens	PAMR1	peptidase domain containing associated with muscle regeneration 1			Enzymes; Predicted secreted proteins; Predicted intracellular proteins; Peptidases:Serine-type peptidases			(M3468)NABA ECM REGULATORS; (M5885)NABA MATRISOME ASSOCIATED; (M5889)NABA MATRISOME		1.0	0.0	0.0	0.0	0.0	0.0	0.0	0.0	0.0	0.0	0.0	0.0	0.0	0.0	0.0	0.0	0.0	0.0	0.0	0.0
SOX4	6659	symbol	H. sapiens	6659	H. sapiens	SOX4	SRY-box transcription factor 4	GO:2000759 regulation of N-terminal peptidyl-lysine acetylation;GO:2000761 positive regulation of N-terminal peptidyl-lysine acetylation;GO:0002328 pro-B cell differentiation		Human disease related genes:Congenital malformations:Other congenital malformations; Transcription factors:Other all-alpha-helical DNA-binding domains; Predicted intracellular proteins; Disease related genes	Nucleoplasm (Supported); Additional: Mitochondria				0.0	1.0	0.0	0.0	0.0	0.0	1.0	1.0	1.0	0.0	0.0	1.0	1.0	1.0	1.0	0.0	0.0	0.0	0.0	0.0
KBTBD11	9920	symbol	H. sapiens	9920	H. sapiens	KBTBD11	kelch repeat and BTB domain containing 11			Predicted intracellular proteins	Intermediate filaments (Approved)				0.0	0.0	0.0	0.0	0.0	0.0	0.0	0.0	0.0	0.0	0.0	0.0	0.0	0.0	0.0	0.0	0.0	0.0	0.0	0.0
STEAP2	261729	symbol	H. sapiens	261729	H. sapiens	STEAP2	STEAP2 metalloreductase	GO:0015679 plasma membrane copper ion transport;GO:0098705 copper ion import across plasma membrane;GO:0098711 iron ion import across plasma membrane		Transporters:Transport Electron Carriers; Predicted intracellular proteins	Vesicles (Supported)				0.0	0.0	1.0	0.0	0.0	0.0	0.0	0.0	0.0	0.0	0.0	0.0	0.0	0.0	0.0	1.0	0.0	0.0	0.0	0.0
KIF21A	55605	symbol	H. sapiens	55605	H. sapiens	KIF21A	kinesin family member 21A	GO:0007018 microtubule-based movement;GO:0007017 microtubule-based process;GO:0006928 movement of cell or subcellular component		Human disease related genes:Nervous system diseases:Eye disease; Predicted intracellular proteins; Disease related genes	Plasma membrane (Enhanced); Additional: Cytosol				0.0	0.0	0.0	0.0	0.0	0.0	0.0	0.0	0.0	0.0	0.0	0.0	0.0	0.0	0.0	0.0	0.0	0.0	0.0	0.0
GLIPR2	152007	symbol	H. sapiens	152007	H. sapiens	GLIPR2	GLI pathogenesis related 2	GO:0010718 positive regulation of epithelial to mesenchymal transition;GO:0010717 regulation of epithelial to mesenchymal transition;GO:0010634 positive regulation of epithelial cell migration		Predicted intracellular proteins	Vesicles (Uncertain); Additional: Microtubules	L-cysteic acid		(M5947)HALLMARK IL2 STAT5 SIGNALING	0.0	0.0	0.0	1.0	0.0	0.0	0.0	0.0	0.0	0.0	0.0	0.0	0.0	0.0	0.0	0.0	0.0	0.0	0.0	0.0
CUBN	8029	symbol	H. sapiens	8029	H. sapiens	CUBN	cubilin	GO:0015889 cobalamin transport;GO:0009235 cobalamin metabolic process;GO:0042953 lipoprotein transport		Human disease related genes:Cardiovascular diseases:Hematologic diseases; Predicted intracellular proteins; Disease related genes		Hydroxocobalamin			0.0	1.0	0.0	0.0	0.0	0.0	0.0	0.0	0.0	0.0	0.0	0.0	0.0	0.0	0.0	0.0	0.0	0.0	0.0	0.0
GPRC5B	51704	symbol	H. sapiens	51704	H. sapiens	GPRC5B	G protein-coupled receptor class C group 5 member B	GO:0060907 positive regulation of macrophage cytokine production;GO:0010935 regulation of macrophage cytokine production;GO:0061081 positive regulation of myeloid leukocyte cytokine production involved in immune response		G-protein coupled receptors:GPCRs excl olfactory receptors; G-protein coupled receptors:Family 3 (C) receptors; Predicted intracellular proteins	Vesicles (Supported); Additional: Nucleoli;Nucleoplasm			(M5953)HALLMARK KRAS SIGNALING UP	0.0	0.0	0.0	1.0	0.0	0.0	0.0	1.0	0.0	0.0	0.0	0.0	0.0	0.0	0.0	0.0	0.0	1.0	0.0	0.0
MLKL	197259	symbol	H. sapiens	197259	H. sapiens	MLKL	mixed lineage kinase domain like pseudokinase	GO:0097528 execution phase of necroptosis;GO:0097527 necroptotic signaling pathway;GO:0070207 protein homotrimerization	Other	Enzymes; Kinases; Transporters:Transporter channels and pores; Predicted intracellular proteins	Plasma membrane (Supported); Additional: Cell Junctions;Cytosol				0.0	0.0	0.0	0.0	0.0	0.0	0.0	0.0	0.0	0.0	0.0	0.0	0.0	0.0	0.0	0.0	0.0	0.0	0.0	0.0
NTN1	9423	symbol	H. sapiens	9423	H. sapiens	NTN1	netrin 1	GO:0061643 chemorepulsion of axon;GO:0032488 Cdc42 protein signal transduction;GO:0033564 anterior/posterior axon guidance		Human disease related genes:Nervous system diseases:Other nervous and sensory system diseases; Cancer-related genes:Candidate cancer biomarkers; Predicted secreted proteins; Disease related genes; Predicted intracellular proteins	Cytosol (Approved); Additional: Actin filaments;Nucleoplasm		(M108)PID NETRIN PATHWAY; (M5887)NABA BASEMENT MEMBRANES; (M3008)NABA ECM GLYCOPROTEINS		0.0	0.0	0.0	1.0	1.0	1.0	0.0	1.0	1.0	0.0	0.0	0.0	0.0	0.0	0.0	0.0	0.0	0.0	0.0	0.0
NRP1	8829	symbol	H. sapiens	8829	H. sapiens	NRP1	neuropilin 1	GO:0060301 positive regulation of cytokine activity;GO:1902378 VEGF-activated neuropilin signaling pathway involved in axon guidance;GO:1905040 otic placode development		CD markers; Cancer-related genes:Candidate cancer biomarkers; Transporters:Accessory Factors Involved in Transport; Predicted secreted proteins; Predicted intracellular proteins		Palifermin; Pegaptanib	(M137)PID VEGF VEGFR PATHWAY; (M226)PID VEGFR1 PATHWAY	(M5919)HALLMARK HEDGEHOG SIGNALING; (M5944)HALLMARK ANGIOGENESIS; (M5942)HALLMARK UV RESPONSE DN	0.0	0.0	0.0	1.0	1.0	1.0	0.0	1.0	1.0	0.0	0.0	0.0	1.0	1.0	1.0	0.0	0.0	0.0	0.0	0.0
RAB31	11031	symbol	H. sapiens	11031	H. sapiens	RAB31	RAB31, member RAS oncogene family	GO:0060100 positive regulation of phagocytosis, engulfment;GO:1905155 positive regulation of membrane invagination;GO:0060099 regulation of phagocytosis, engulfment		Predicted intracellular proteins				(M5896)HALLMARK TGF BETA SIGNALING; (M5906)HALLMARK ESTROGEN RESPONSE EARLY; (M5907)HALLMARK ESTROGEN RESPONSE LATE	0.0	0.0	1.0	0.0	0.0	0.0	0.0	0.0	0.0	1.0	0.0	1.0	0.0	0.0	0.0	0.0	0.0	0.0	0.0	0.0
MMP2	4313	symbol	H. sapiens	4313	H. sapiens	MMP2	matrix metallopeptidase 2	GO:0014012 peripheral nervous system axon regeneration;GO:0001957 intramembranous ossification;GO:0036072 direct ossification		Candidate cardiovascular disease genes; Cancer-related genes:Candidate cancer biomarkers; ENZYME proteins:Hydrolases; Predicted secreted proteins; Human disease related genes:Cancers:Cancers of male genital organs; Cancer-related genes:Mutational cancer driver genes; Peptidases:Metallopeptidases; Human disease related genes:Cancers:Cancers of the breast and female genital organs; Human disease re…	Vesicles (Approved)	Marimastat; Captopril; SC-74020; Halofuginone; AE-941; Endostatin	(M63)PID AVB3 OPN PATHWAY; (M240)PID SYNDECAN 2 PATHWAY; (M65)PID FRA PATHWAY	(M5946)HALLMARK COAGULATION; (M5902)HALLMARK APOPTOSIS; (M5915)HALLMARK APICAL JUNCTION	1.0	1.0	1.0	1.0	0.0	1.0	0.0	1.0	1.0	0.0	0.0	1.0	1.0	1.0	1.0	1.0	1.0	1.0	0.0	1.0
ALKBH8	91801	symbol	H. sapiens	91801	H. sapiens	ALKBH8	alkB homolog 8, tRNA methyltransferase	GO:0002098 tRNA wobble uridine modification;GO:0002097 tRNA wobble base modification;GO:0030488 tRNA methylation		Human disease related genes:Other diseases:Mental and behavioural disorders; Disease related genes; Potential drug targets; Enzymes; Predicted intracellular proteins; ENZYME proteins:Transferases	Nuclear bodies (Supported); Additional: Nucleoplasm				0.0	0.0	0.0	0.0	0.0	0.0	0.0	0.0	0.0	0.0	0.0	0.0	0.0	0.0	0.0	0.0	0.0	0.0	0.0	0.0
SMPDL3A	10924	symbol	H. sapiens	10924	H. sapiens	SMPDL3A	sphingomyelin phosphodiesterase acid like 3A	GO:0009143 nucleoside triphosphate catabolic process;GO:1901292 nucleoside phosphate catabolic process;GO:0009141 nucleoside triphosphate metabolic process		Predicted secreted proteins; Predicted intracellular proteins	Mitochondria;Nucleoli;Nucleoplasm (Approved)			(M5947)HALLMARK IL2 STAT5 SIGNALING	0.0	0.0	0.0	0.0	0.0	0.0	0.0	0.0	0.0	0.0	0.0	0.0	0.0	0.0	0.0	0.0	0.0	0.0	0.0	0.0
MIR4697HG	22997	gene_synonym	H. sapiens	22997	H. sapiens	IGSF9B	immunoglobulin superfamily member 9B	GO:0007155 cell adhesion;GO:0022610 biological adhesion;GO:0007399 nervous system development		Predicted intracellular proteins	Cell Junctions;Golgi apparatus (Approved)				0.0	0.0	0.0	0.0	0.0	0.0	0.0	0.0	0.0	0.0	0.0	0.0	0.0	0.0	0.0	0.0	0.0	0.0	0.0	0.0
ELF2	1998	symbol	H. sapiens	1998	H. sapiens	ELF2	E74 like ETS transcription factor 2	GO:0045893 positive regulation of transcription, DNA-templated;GO:1903508 positive regulation of nucleic acid-templated transcription;GO:1902680 positive regulation of RNA biosynthetic process		Transcription factors:Helix-turn-helix domains; Predicted intracellular proteins	Nucleoplasm (Supported); Additional: Nuclear bodies		(M92)PID ANGIOPOIETIN RECEPTOR PATHWAY		0.0	0.0	0.0	0.0	0.0	0.0	0.0	0.0	0.0	0.0	0.0	0.0	0.0	0.0	0.0	0.0	0.0	0.0	0.0	1.0
BST2	684	symbol	H. sapiens	684	H. sapiens	BST2	bone marrow stromal cell antigen 2	GO:0002736 regulation of plasmacytoid dendritic cell cytokine production;GO:0002737 negative regulation of plasmacytoid dendritic cell cytokine production;GO:0002731 negative regulation of dendritic cell cytokine production		Transporters:Transporter channels and pores; CD markers	Golgi apparatus;Vesicles (Supported)			(M5911)HALLMARK INTERFERON ALPHA RESPONSE; (M5913)HALLMARK INTERFERON GAMMA RESPONSE; (M5932)HALLMARK INFLAMMATORY RESPONSE	0.0	0.0	0.0	0.0	0.0	1.0	0.0	0.0	0.0	1.0	0.0	0.0	0.0	0.0	0.0	0.0	0.0	1.0	0.0	0.0
KIAA1324L	222223	gene_synonym	H. sapiens	222223	H. sapiens	ELAPOR2	endosome-lysosome associated apoptosis and autophagy regulator family member 2	GO:0045684 positive regulation of epidermis development;GO:0030513 positive regulation of BMP signaling pathway;GO:0045682 regulation of epidermis development		Predicted intracellular proteins	Endoplasmic reticulum (Approved)				0.0	0.0	0.0	0.0	0.0	1.0	0.0	0.0	0.0	0.0	0.0	0.0	0.0	0.0	0.0	0.0	0.0	0.0	0.0	0.0
USP43	124739	symbol	H. sapiens	124739	H. sapiens	USP43	ubiquitin specific peptidase 43	GO:0019985 translesion synthesis;GO:0006301 postreplication repair;GO:0000731 DNA synthesis involved in DNA repair		Enzymes; ENZYME proteins:Hydrolases; Predicted intracellular proteins; Peptidases:Cysteine-type peptidases	Nuclear speckles;Nucleoplasm (Approved)				0.0	0.0	0.0	0.0	0.0	0.0	0.0	0.0	0.0	0.0	0.0	0.0	0.0	0.0	0.0	0.0	0.0	0.0	0.0	0.0
FOXO1	2308	symbol	H. sapiens	2308	H. sapiens	FOXO1	forkhead box O1	GO:0071455 cellular response to hyperoxia;GO:0010616 negative regulation of cardiac muscle adaptation;GO:1903243 negative regulation of cardiac muscle hypertrophy in response to stress		Transcription factors:Helix-turn-helix domains; Cancer-related genes:Candidate cancer biomarkers; Human disease related genes:Cancers:Cancers of soft tissues and bone; Human disease related genes:Cancers:Cancers of haematopoietic and lymphoid tissues; Disease related genes; Predicted intracellular proteins	Cytosol;Nucleoplasm (Supported)		(M32)PID HDAC CLASSIII PATHWAY; (M249)PID PI3KCI AKT PATHWAY; (M183)PID IL6 7 PATHWAY	(M5957)HALLMARK PANCREAS BETA CELLS	0.0	1.0	1.0	1.0	0.0	1.0	1.0	1.0	1.0	0.0	0.0	1.0	0.0	0.0	1.0	1.0	1.0	1.0	0.0	1.0
IL22RA1	58985	symbol	H. sapiens	58985	H. sapiens	IL22RA1	interleukin 22 receptor subunit alpha 1	GO:0050829 defense response to Gram-negative bacterium;GO:0042742 defense response to bacterium;GO:0019221 cytokine-mediated signaling pathway							0.0	0.0	0.0	0.0	0.0	0.0	0.0	0.0	0.0	0.0	0.0	0.0	0.0	0.0	0.0	0.0	0.0	1.0	0.0	0.0
RNF144A-AS1	386597	gene_synonym	H. sapiens	386597	H. sapiens	GRASLND	glycosaminoglycan regulatory associated long non-coding RNA								0.0	0.0	0.0	0.0	0.0	0.0	0.0	0.0	0.0	0.0	0.0	0.0	0.0	0.0	0.0	0.0	0.0	0.0	0.0	0.0
HSD3B7	80270	symbol	H. sapiens	80270	H. sapiens	HSD3B7	hydroxy-delta-5-steroid dehydrogenase, 3 beta- and steroid delta-isomerase 7	GO:0035754 B cell chemotaxis;GO:0006699 bile acid biosynthetic process;GO:0008206 bile acid metabolic process		ENZYME proteins:Oxidoreductases; Human disease related genes:Congenital disorders of metabolism:Congenital disorders of lipid/glycolipid metabolism; Disease related genes; Potential drug targets; Enzymes; Predicted intracellular proteins	Lipid droplets (Enhanced)			(M5949)HALLMARK PEROXISOME; (M5948)HALLMARK BILE ACID METABOLISM	0.0	1.0	0.0	1.0	0.0	0.0	0.0	0.0	0.0	0.0	0.0	0.0	0.0	0.0	0.0	0.0	0.0	0.0	0.0	0.0
FAM49A	81553	gene_synonym	H. sapiens	81553	H. sapiens	CYRIA	CYFIP related Rac1 interactor A	GO:0030833 regulation of actin filament polymerization;GO:0008064 regulation of actin polymerization or depolymerization;GO:0030832 regulation of actin filament length		Predicted intracellular proteins	Nucleoplasm (Approved)				0.0	0.0	0.0	0.0	0.0	1.0	0.0	0.0	0.0	0.0	0.0	0.0	0.0	0.0	0.0	0.0	0.0	0.0	0.0	0.0
RASL11B	65997	symbol	H. sapiens	65997	H. sapiens	RASL11B	RAS like family 11 member B	GO:0030512 negative regulation of transforming growth factor beta receptor signaling pathway;GO:0017015 regulation of transforming growth factor beta receptor signaling pathway;GO:1903844 regulation of cellular response to transforming growth factor beta stimulus		Enzymes; ENZYME proteins:Hydrolases; Predicted intracellular proteins	Nuclear bodies (Approved)				0.0	0.0	0.0	0.0	0.0	0.0	0.0	0.0	0.0	0.0	0.0	0.0	0.0	0.0	0.0	0.0	0.0	0.0	0.0	0.0
LRRC15	131578	symbol	H. sapiens	131578	H. sapiens	LRRC15	leucine rich repeat containing 15	GO:0046813 receptor-mediated virion attachment to host cell;GO:0019062 virion attachment to host cell;GO:0044650 adhesion of symbiont to host cell		Transporters:Accessory Factors Involved in Transport	Vesicles (Approved); Additional: Plasma membrane			(M5930)HALLMARK EPITHELIAL MESENCHYMAL TRANSITION	0.0	0.0	0.0	1.0	0.0	0.0	0.0	0.0	0.0	0.0	0.0	0.0	0.0	0.0	0.0	0.0	0.0	0.0	0.0	0.0
STRN	6801	symbol	H. sapiens	6801	H. sapiens	STRN	striatin	GO:0070830 bicellular tight junction assembly;GO:0120192 tight junction assembly;GO:0043297 apical junction assembly		Predicted intracellular proteins; Cancer-related genes	Cytosol (Approved); Additional: Nucleoplasm		(M41)PID ER NONGENOMIC PATHWAY	(M5953)HALLMARK KRAS SIGNALING UP	0.0	1.0	0.0	0.0	0.0	1.0	0.0	0.0	0.0	0.0	0.0	0.0	0.0	0.0	1.0	0.0	0.0	0.0	0.0	0.0
SERPINF1	5176	symbol	H. sapiens	5176	H. sapiens	SERPINF1	serpin family F member 1	GO:0071279 cellular response to cobalt ion;GO:0060770 negative regulation of epithelial cell proliferation involved in prostate gland development;GO:0060768 regulation of epithelial cell proliferation involved in prostate gland development		Cancer-related genes:Candidate cancer biomarkers; Predicted secreted proteins; Human disease related genes:Congenital malformations:Congenital malformations of the musculoskeletal system; Disease related genes; Predicted intracellular proteins		Copper	(M3468)NABA ECM REGULATORS; (M5885)NABA MATRISOME ASSOCIATED; (M5889)NABA MATRISOME		1.0	1.0	1.0	1.0	1.0	1.0	0.0	1.0	0.0	0.0	0.0	1.0	0.0	1.0	1.0	1.0	1.0	0.0	0.0	0.0
CBLB	868	symbol	H. sapiens	868	H. sapiens	CBLB	Cbl proto-oncogene B	GO:2000583 regulation of platelet-derived growth factor receptor-alpha signaling pathway;GO:0002669 positive regulation of T cell anergy;GO:0002913 positive regulation of lymphocyte anergy		Enzymes; Predicted intracellular proteins; ENZYME proteins:Transferases; Cancer-related genes	Cytosol (Supported); Additional: Nucleoplasm		(M45)PID CD40 PATHWAY; (M214)PID ERBB1 INTERNALIZATION PATHWAY; (M60)PID NFAT TFPATHWAY	(M5921)HALLMARK COMPLEMENT	0.0	0.0	0.0	1.0	0.0	0.0	1.0	0.0	0.0	0.0	0.0	0.0	0.0	1.0	1.0	0.0	0.0	0.0	0.0	0.0
LGI2	55203	symbol	H. sapiens	55203	H. sapiens	LGI2	leucine rich repeat LGI family member 2	GO:1904862 inhibitory synapse assembly;GO:0007416 synapse assembly;GO:0034329 cell junction assembly		Predicted secreted proteins	Centrosome (Uncertain)		(M3008)NABA ECM GLYCOPROTEINS; (M5884)NABA CORE MATRISOME; (M5889)NABA MATRISOME		0.0	0.0	0.0	0.0	0.0	0.0	0.0	0.0	0.0	0.0	0.0	0.0	0.0	0.0	0.0	0.0	0.0	0.0	0.0	0.0
CHRNA9	55584	symbol	H. sapiens	55584	H. sapiens	CHRNA9	cholinergic receptor nicotinic alpha 9 subunit	GO:0050910 detection of mechanical stimulus involved in sensory perception of sound;GO:0010996 response to auditory stimulus;GO:0050974 detection of mechanical stimulus involved in sensory perception		Transporters:Transporter channels and pores		Nicotine; Ethanol; ATG003; Lobeline; RPI-78M; Tetraethylammonium			0.0	0.0	0.0	1.0	1.0	0.0	0.0	1.0	0.0	0.0	0.0	1.0	0.0	0.0	0.0	0.0	0.0	0.0	0.0	0.0
WISP2	8839	gene_synonym	H. sapiens	8839	H. sapiens	CCN5	cellular communication network factor 5	GO:0007155 cell adhesion;GO:0022610 biological adhesion;GO:0007267 cell-cell signaling		Predicted secreted proteins			(M3008)NABA ECM GLYCOPROTEINS; (M5884)NABA CORE MATRISOME; (M5889)NABA MATRISOME	(M5891)HALLMARK HYPOXIA; (M5906)HALLMARK ESTROGEN RESPONSE EARLY; (M5907)HALLMARK ESTROGEN RESPONSE LATE	0.0	0.0	0.0	0.0	0.0	0.0	0.0	0.0	0.0	0.0	0.0	0.0	0.0	0.0	0.0	0.0	0.0	0.0	0.0	0.0
GLIS3	169792	symbol	H. sapiens	169792	H. sapiens	GLIS3	GLIS family zinc finger 3	GO:0006366 transcription by RNA polymerase II;GO:0006351 transcription, DNA-templated;GO:0097659 nucleic acid-templated transcription		Transcription factors:Zinc-coordinating DNA-binding domains; Human disease related genes:Endocrine and metabolic diseases:Diabetes; Predicted intracellular proteins; Disease related genes	Nucleoplasm (Supported)				0.0	0.0	0.0	0.0	0.0	0.0	0.0	0.0	0.0	0.0	0.0	0.0	0.0	0.0	0.0	0.0	0.0	0.0	0.0	0.0
EML6	400954	symbol	H. sapiens	400954	H. sapiens	EML6	EMAP like 6			Predicted intracellular proteins	Mitochondria (Approved); Additional: Vesicles				0.0	0.0	0.0	0.0	0.0	0.0	0.0	0.0	0.0	0.0	0.0	0.0	0.0	0.0	0.0	0.0	0.0	0.0	0.0	0.0
GAB3	139716	symbol	H. sapiens	139716	H. sapiens	GAB3	GRB2 associated binding protein 3	GO:0030225 macrophage differentiation;GO:0002573 myeloid leukocyte differentiation;GO:0030099 myeloid cell differentiation		Predicted intracellular proteins	Nuclear speckles (Approved); Additional: Cytosol;Nucleoplasm				0.0	0.0	0.0	0.0	0.0	0.0	0.0	0.0	0.0	0.0	0.0	0.0	0.0	0.0	0.0	0.0	0.0	0.0	0.0	0.0
ANGPTL2	23452	symbol	H. sapiens	23452	H. sapiens	ANGPTL2	angiopoietin like 2	GO:0007275 multicellular organism development;GO:0048856 anatomical structure development;GO:0032502 developmental process		Predicted secreted proteins; Predicted intracellular proteins	Golgi apparatus (Approved)		(M16801)SIG REGULATION OF THE ACTIN CYTOSKELETON BY RHO GTPASES; (M5193)SIG CHEMOTAXIS; (M5883)NABA SECRETED FACTORS		1.0	0.0	0.0	0.0	0.0	0.0	0.0	0.0	0.0	0.0	0.0	0.0	0.0	0.0	0.0	0.0	0.0	0.0	0.0	0.0
EML1	2009	symbol	H. sapiens	2009	H. sapiens	EML1	EMAP like 1	GO:0007405 neuroblast proliferation;GO:0061351 neural precursor cell proliferation;GO:0007052 mitotic spindle organization		Predicted intracellular proteins; Disease related genes					0.0	0.0	0.0	0.0	0.0	0.0	0.0	0.0	0.0	0.0	0.0	0.0	0.0	0.0	0.0	0.0	0.0	0.0	0.0	0.0
RARRES2	5919	symbol	H. sapiens	5919	H. sapiens	RARRES2	retinoic acid receptor responder 2	GO:0019732 antifungal humoral response;GO:0061760 antifungal innate immune response;GO:0010759 positive regulation of macrophage chemotaxis		Predicted secreted proteins					0.0	1.0	1.0	1.0	1.0	0.0	1.0	0.0	0.0	0.0	0.0	1.0	0.0	0.0	0.0	0.0	0.0	0.0	0.0	0.0
E2F7	144455	symbol	H. sapiens	144455	H. sapiens	E2F7	E2F transcription factor 7	GO:0032877 positive regulation of DNA endoreduplication;GO:0071930 negative regulation of transcription involved in G1/S transition of mitotic cell cycle;GO:0032875 regulation of DNA endoreduplication		Transcription factors:Helix-turn-helix domains; Predicted intracellular proteins	Nuclear speckles (Supported)		(M40)PID E2F PATHWAY		0.0	0.0	0.0	0.0	1.0	0.0	0.0	0.0	1.0	0.0	0.0	0.0	1.0	0.0	1.0	0.0	0.0	0.0	0.0	0.0
IL33	90865	symbol	H. sapiens	90865	H. sapiens	IL33	interleukin 33	GO:0010185 regulation of cellular defense response;GO:0010186 positive regulation of cellular defense response;GO:0120042 negative regulation of macrophage proliferation		Predicted secreted proteins; Predicted intracellular proteins	Nucleoplasm (Supported); Additional: Vesicles			(M5953)HALLMARK KRAS SIGNALING UP	0.0	0.0	0.0	1.0	0.0	0.0	1.0	0.0	0.0	0.0	0.0	0.0	0.0	0.0	1.0	0.0	0.0	1.0	0.0	0.0
MAN1A1	4121	symbol	H. sapiens	4121	H. sapiens	MAN1A1	mannosidase alpha class 1A member 1	GO:1904381 Golgi apparatus mannose trimming;GO:0035977 protein deglycosylation involved in glycoprotein catabolic process;GO:0097466 ubiquitin-dependent glycoprotein ERAD pathway		Enzymes; ENZYME proteins:Hydrolases	Golgi apparatus (Supported)			(M5934)HALLMARK XENOBIOTIC METABOLISM	0.0	0.0	0.0	0.0	0.0	0.0	0.0	0.0	0.0	0.0	0.0	0.0	0.0	0.0	0.0	0.0	0.0	0.0	1.0	0.0
STEAP1	26872	symbol	H. sapiens	26872	H. sapiens	STEAP1	STEAP family member 1	GO:0055072 iron ion homeostasis;GO:0055076 transition metal ion homeostasis;GO:0055065 metal ion homeostasis		Transporters:Transport Electron Carriers; Cancer-related genes:Candidate cancer biomarkers					0.0	0.0	0.0	0.0	0.0	0.0	0.0	0.0	0.0	0.0	0.0	0.0	0.0	0.0	0.0	1.0	0.0	0.0	0.0	0.0
SYTL3	94120	symbol	H. sapiens	94120	H. sapiens	SYTL3	synaptotagmin like 3	GO:0006887 exocytosis;GO:0032940 secretion by cell;GO:0140352 export from cell		Predicted intracellular proteins	Nucleoli fibrillar center;Vesicles (Approved)				0.0	0.0	0.0	0.0	0.0	0.0	0.0	0.0	0.0	0.0	0.0	0.0	0.0	0.0	0.0	0.0	0.0	0.0	0.0	0.0
LVCAT1	100506827	gene_synonym	H. sapiens	100506827	H. sapiens	LINC02475	long intergenic non-protein coding RNA 2475								0.0	0.0	0.0	0.0	0.0	0.0	0.0	0.0	0.0	0.0	0.0	0.0	0.0	0.0	0.0	0.0	0.0	0.0	0.0	0.0
ANXA5	308	symbol	H. sapiens	308	H. sapiens	ANXA5	annexin A5	GO:0050819 negative regulation of coagulation;GO:0050818 regulation of coagulation;GO:0007596 blood coagulation		Transporters:Transporter channels and pores; FDA approved drug targets:Small molecule drugs; Predicted intracellular proteins; Disease related genes	Nuclear membrane (Approved)	Fluocinolone acetonide; L-Alpha-Glycerophosphorylserine; L-thioproline; K201 free base; sn-glycero-3-phosphoethanolamine; 1,4-Dideoxy-O2-Sulfo-Glucuronic Acid; N,O6-Disulfo-Glucosamine; 1,4-Dideoxy-5-Dehydro-O2-Sulfo-Glucuronic Acid; Copper	(M5880)NABA ECM AFFILIATED; (M5885)NABA MATRISOME ASSOCIATED; (M5889)NABA MATRISOME	(M5892)HALLMARK CHOLESTEROL HOMEOSTASIS; (M5921)HALLMARK COMPLEMENT	1.0	1.0	0.0	0.0	0.0	0.0	0.0	0.0	0.0	0.0	0.0	0.0	0.0	0.0	0.0	0.0	0.0	0.0	0.0	0.0
IL1RN	3557	symbol	H. sapiens	3557	H. sapiens	IL1RN	interleukin 1 receptor antagonist	GO:2000660 negative regulation of interleukin-1-mediated signaling pathway;GO:2000659 regulation of interleukin-1-mediated signaling pathway;GO:0034115 negative regulation of heterotypic cell-cell adhesion		Candidate cardiovascular disease genes; Human disease related genes:Immune system diseases:Allergies and autoimmune diseases; Cancer-related genes:Candidate cancer biomarkers; Predicted secreted proteins; Disease related genes; Predicted intracellular proteins	Nucleoplasm (Approved); Additional: Centrosome;Cytosol	Rilonacept	(M110)PID IL1 PATHWAY; (M5883)NABA SECRETED FACTORS; (M5885)NABA MATRISOME ASSOCIATED		1.0	1.0	1.0	0.0	0.0	0.0	0.0	0.0	0.0	0.0	0.0	0.0	0.0	1.0	0.0	0.0	0.0	1.0	0.0	0.0
PTGS1	5742	symbol	H. sapiens	5742	H. sapiens	PTGS1	prostaglandin-endoperoxide synthase 1	GO:0019371 cyclooxygenase pathway;GO:0001516 prostaglandin biosynthetic process;GO:0046457 prostanoid biosynthetic process		FDA approved drug targets:Small molecule drugs; ENZYME proteins:Oxidoreductases; Cancer-related genes:Candidate cancer biomarkers; Enzymes; Predicted intracellular proteins	Golgi apparatus (Supported); Additional: Vesicles	Dihomo-gamma-linolenic acid; Icosapent; Mesalazine; Acetaminophen; Indomethacin; Minoxidil; Nabumetone; Ketorolac; Tenoxicam; Tolmetin; Piroxicam; Fenoprofen; Diclofenac; Sulindac; Diethylcarbamazine; Flurbiprofen; Etodolac; Mefenamic acid; Naproxen; Sulfasalazine; Phenylbutazone; Meloxicam; Carprofen; Diflunisal; Suprofen; Salicylic acid; Meclofenamic acid; Acetylsalicylic acid; Bromfenac; Oxapr…			0.0	1.0	0.0	0.0	0.0	0.0	0.0	0.0	0.0	0.0	0.0	0.0	0.0	0.0	0.0	0.0	0.0	0.0	0.0	0.0
SERPINB8	5271	symbol	H. sapiens	5271	H. sapiens	SERPINB8	serpin family B member 8	GO:0090136 epithelial cell-cell adhesion;GO:0010951 negative regulation of endopeptidase activity;GO:0010466 negative regulation of peptidase activity		Human disease related genes:Congenital malformations:Congenital malformations of skin; Predicted intracellular proteins; Disease related genes	Nucleoplasm (Approved); Additional: Cytosol		(M3468)NABA ECM REGULATORS; (M5885)NABA MATRISOME ASSOCIATED; (M5889)NABA MATRISOME	(M5890)HALLMARK TNFA SIGNALING VIA NFKB	1.0	0.0	0.0	0.0	0.0	0.0	0.0	0.0	0.0	0.0	0.0	0.0	0.0	0.0	0.0	0.0	0.0	0.0	0.0	0.0
FGF7	2252	symbol	H. sapiens	2252	H. sapiens	FGF7	fibroblast growth factor 7	GO:0060665 regulation of branching involved in salivary gland morphogenesis by mesenchymal-epithelial signaling;GO:0061033 secretion by lung epithelial cell involved in lung growth;GO:0060501 positive regulation of epithelial cell proliferation involved in lung morphogenesis		RAS pathway related proteins; Predicted secreted proteins; Predicted intracellular proteins; Cancer-related genes:Candidate cancer biomarkers	Nucleoli;Nucleoplasm (Approved)		(M5883)NABA SECRETED FACTORS; (M5885)NABA MATRISOME ASSOCIATED; (M5889)NABA MATRISOME		1.0	0.0	0.0	1.0	1.0	0.0	0.0	0.0	1.0	0.0	0.0	0.0	0.0	0.0	0.0	0.0	1.0	0.0	0.0	0.0
PDGFB	5155	symbol	H. sapiens	5155	H. sapiens	PDGFB	platelet derived growth factor subunit B	GO:0072255 metanephric glomerular mesangial cell development;GO:0072209 metanephric mesangial cell differentiation;GO:0072254 metanephric glomerular mesangial cell differentiation		Candidate cardiovascular disease genes; Human disease related genes:Cancers:Cancers of eye, brain, and central nervous system; Cancer-related genes:Candidate cancer biomarkers; Predicted secreted proteins; Predicted intracellular proteins; Disease related genes; Human disease related genes:Cancers:Cancers of the lung and pleura; RAS pathway related proteins; Human disease related genes:Nervous sy…	Vesicles (Approved)	Pegpleranib	(M103)PID S1P S1P1 PATHWAY; (M55)PID S1P S1P3 PATHWAY; (M72)PID NECTIN PATHWAY	(M5946)HALLMARK COAGULATION; (M5891)HALLMARK HYPOXIA; (M5921)HALLMARK COMPLEMENT	1.0	1.0	0.0	1.0	1.0	1.0	1.0	1.0	1.0	0.0	0.0	0.0	1.0	1.0	0.0	0.0	1.0	1.0	0.0	1.0
KIAA1644	85352	gene_synonym	H. sapiens	85352	H. sapiens	SHISAL1	shisa like 1				Cytosol;Vesicles (Approved)				0.0	0.0	0.0	0.0	0.0	0.0	0.0	0.0	0.0	0.0	0.0	0.0	0.0	0.0	0.0	0.0	0.0	0.0	0.0	0.0
FAM84A	151354	gene_synonym	H. sapiens	151354	H. sapiens	LRATD1	LRAT domain containing 1	GO:0000902 cell morphogenesis;GO:0048870 cell motility;GO:0051674 localization of cell		Predicted intracellular proteins	Nucleoplasm (Approved)				0.0	0.0	0.0	0.0	0.0	1.0	0.0	0.0	0.0	0.0	0.0	0.0	0.0	0.0	0.0	0.0	0.0	0.0	0.0	0.0
CHI3L2	1117	symbol	H. sapiens	1117	H. sapiens	CHI3L2	chitinase 3 like 2	GO:0006030 chitin metabolic process;GO:0006032 chitin catabolic process;GO:1901072 glucosamine-containing compound catabolic process		Predicted secreted proteins; Predicted intracellular proteins					0.0	0.0	0.0	0.0	0.0	0.0	0.0	0.0	0.0	0.0	0.0	0.0	0.0	0.0	0.0	0.0	0.0	0.0	1.0	0.0
TSHZ1	10194	symbol	H. sapiens	10194	H. sapiens	TSHZ1	teashirt zinc finger homeobox 1	GO:0060023 soft palate development;GO:0042474 middle ear morphogenesis;GO:0062009 secondary palate development		Transcription factors:Helix-turn-helix domains; Human disease related genes:Congenital malformations:Congenital malformations of ear; Predicted intracellular proteins; Disease related genes	Nucleoplasm (Approved)				0.0	0.0	0.0	0.0	1.0	0.0	0.0	1.0	0.0	0.0	0.0	0.0	0.0	0.0	0.0	0.0	0.0	0.0	0.0	0.0
MASP1	5648	symbol	H. sapiens	5648	H. sapiens	MASP1	MBL associated serine protease 1	GO:0001867 complement activation, lectin pathway;GO:0006956 complement activation;GO:0006959 humoral immune response		Predicted secreted proteins; Human disease related genes:Congenital malformations:Other congenital malformations; Disease related genes; Potential drug targets; Enzymes; Predicted intracellular proteins; Peptidases:Serine-type peptidases	Cytosol;Nucleoplasm (Enhanced)		(M3468)NABA ECM REGULATORS; (M5885)NABA MATRISOME ASSOCIATED; (M5889)NABA MATRISOME		1.0	0.0	0.0	0.0	0.0	0.0	0.0	0.0	0.0	0.0	0.0	0.0	0.0	0.0	0.0	0.0	0.0	0.0	0.0	0.0
SPON1	10418	symbol	H. sapiens	10418	H. sapiens	SPON1	spondin 1	GO:1902993 positive regulation of amyloid precursor protein catabolic process;GO:0010954 positive regulation of protein processing;GO:1903319 positive regulation of protein maturation		Predicted secreted proteins	Microtubule ends;Nucleoli (Approved); Additional: Actin filaments;Cytokinetic bridge;Nucleoplasm		(M3008)NABA ECM GLYCOPROTEINS; (M5884)NABA CORE MATRISOME; (M5889)NABA MATRISOME	(M5953)HALLMARK KRAS SIGNALING UP	0.0	0.0	0.0	0.0	0.0	0.0	0.0	0.0	0.0	0.0	0.0	0.0	0.0	0.0	0.0	0.0	0.0	0.0	0.0	0.0
WDFY2	115825	symbol	H. sapiens	115825	H. sapiens	WDFY2	WD repeat and FYVE domain containing 2	GO:0045600 positive regulation of fat cell differentiation;GO:0045598 regulation of fat cell differentiation;GO:0001934 positive regulation of protein phosphorylation		Predicted intracellular proteins	Vesicles (Supported)				0.0	0.0	0.0	1.0	0.0	0.0	0.0	0.0	0.0	0.0	0.0	1.0	0.0	0.0	0.0	0.0	0.0	0.0	0.0	0.0
PLEK2	26499	symbol	H. sapiens	26499	H. sapiens	PLEK2	pleckstrin 2	GO:0031532 actin cytoskeleton reorganization;GO:0120034 positive regulation of plasma membrane bounded cell projection assembly;GO:0120032 regulation of plasma membrane bounded cell projection assembly		Predicted intracellular proteins	Vesicles (Uncertain); Additional: Cytosol			(M5953)HALLMARK KRAS SIGNALING UP	0.0	0.0	0.0	0.0	0.0	1.0	0.0	0.0	0.0	0.0	0.0	0.0	0.0	0.0	0.0	0.0	0.0	0.0	0.0	0.0
MSL3	10943	symbol	H. sapiens	10943	H. sapiens	MSL3	MSL complex subunit 3	GO:0043984 histone H4-K16 acetylation;GO:0043968 histone H2A acetylation;GO:0016575 histone deacetylation		Predicted intracellular proteins; Human disease related genes:Other diseases:Mental and behavioural disorders; Disease related genes	Nucleoplasm (Approved)				0.0	0.0	0.0	0.0	0.0	0.0	0.0	0.0	0.0	0.0	0.0	0.0	0.0	0.0	0.0	0.0	0.0	0.0	0.0	0.0
CNIH1	10175	symbol	H. sapiens	10175	H. sapiens	CNIH1	cornichon family AMPA receptor auxiliary protein 1	GO:0016192 vesicle-mediated transport;GO:0006955 immune response;GO:0002376 immune system process		Transporters:Accessory Factors Involved in Transport	Vesicles (Uncertain)				0.0	0.0	0.0	0.0	0.0	0.0	0.0	0.0	0.0	0.0	0.0	0.0	0.0	0.0	0.0	0.0	0.0	0.0	0.0	0.0
MMP10	4319	symbol	H. sapiens	4319	H. sapiens	MMP10	matrix metallopeptidase 10	GO:0030574 collagen catabolic process;GO:0022617 extracellular matrix disassembly;GO:0032963 collagen metabolic process		Cancer-related genes:Candidate cancer biomarkers; ENZYME proteins:Hydrolases; Predicted secreted proteins; Peptidases:Metallopeptidases; Enzymes	Cytosol (Approved); Additional: Plasma membrane	Marimastat; N-ISOBUTYL-N-[4-METHOXYPHENYLSULFONYL]GLYCYL HYDROXAMIC ACID	(M3468)NABA ECM REGULATORS; (M5885)NABA MATRISOME ASSOCIATED; (M5889)NABA MATRISOME	(M5946)HALLMARK COAGULATION; (M5953)HALLMARK KRAS SIGNALING UP	1.0	0.0	0.0	0.0	0.0	0.0	0.0	0.0	0.0	0.0	0.0	0.0	0.0	0.0	0.0	0.0	0.0	0.0	0.0	0.0
TRPA1	8989	symbol	H. sapiens	8989	H. sapiens	TRPA1	transient receptor potential cation channel subfamily A member 1	GO:0050968 detection of chemical stimulus involved in sensory perception of pain;GO:0050955 thermoception;GO:0050966 detection of mechanical stimulus involved in sensory perception of pain		FDA approved drug targets:Small molecule drugs; Voltage-gated ion channels:Transient Receptor Potential Channels; Disease related genes; Transporters:Transporter channels and pores; Human disease related genes:Musculoskeletal diseases:Other musculoskeletal diseases		Levomenthol; Camphor; Cannabidiol; Butamben; (S)-camphor; Tetrahydrocannabivarin; Medical Cannabis; Nabiximols; Cannabidivarin			0.0	0.0	0.0	0.0	0.0	0.0	0.0	0.0	0.0	0.0	0.0	0.0	0.0	0.0	0.0	1.0	0.0	0.0	0.0	0.0
LPCAT1	79888	symbol	H. sapiens	79888	H. sapiens	LPCAT1	lysophosphatidylcholine acyltransferase 1	GO:2001246 negative regulation of phosphatidylcholine biosynthetic process;GO:0150174 negative regulation of phosphatidylcholine metabolic process;GO:2001245 regulation of phosphatidylcholine biosynthetic process		Enzymes; ENZYME proteins:Transferases	Endoplasmic reticulum (Supported); Additional: Lipid droplets				0.0	1.0	0.0	0.0	1.0	0.0	1.0	0.0	0.0	1.0	0.0	0.0	0.0	1.0	0.0	0.0	0.0	0.0	0.0	0.0
CD109	135228	symbol	H. sapiens	135228	H. sapiens	CD109	CD109 molecule	GO:0072675 osteoclast fusion;GO:0072674 multinuclear osteoclast differentiation;GO:0010839 negative regulation of keratinocyte proliferation		CD markers	Plasma membrane (Supported); Additional: Cytosol		(M3468)NABA ECM REGULATORS; (M5885)NABA MATRISOME ASSOCIATED; (M5889)NABA MATRISOME		1.0	0.0	0.0	1.0	0.0	0.0	0.0	0.0	0.0	0.0	0.0	0.0	0.0	1.0	1.0	0.0	0.0	0.0	0.0	0.0
ACSS3	79611	symbol	H. sapiens	79611	H. sapiens	ACSS3	acyl-CoA synthetase short chain family member 3	GO:0046951 ketone body biosynthetic process;GO:0046950 cellular ketone body metabolic process;GO:1902224 ketone body metabolic process		Enzymes; ENZYME proteins:Ligase	Mitochondria (Supported)				0.0	1.0	0.0	0.0	0.0	0.0	0.0	0.0	0.0	0.0	0.0	0.0	0.0	0.0	0.0	0.0	0.0	0.0	0.0	0.0
CTSF	8722	symbol	H. sapiens	8722	H. sapiens	CTSF	cathepsin F	GO:0019886 antigen processing and presentation of exogenous peptide antigen via MHC class II;GO:0002495 antigen processing and presentation of peptide antigen via MHC class II;GO:0002504 antigen processing and presentation of peptide or polysaccharide antigen via MHC class II		Human disease related genes:Congenital disorders of metabolism:Lysosomal storage diseases; ENZYME proteins:Hydrolases; Human disease related genes:Congenital disorders of metabolism:Congenital disorders of lipid/glycolipid metabolism; Peptidases:Cysteine-type peptidases; Disease related genes; Potential drug targets; Enzymes; Predicted intracellular proteins	Vesicles (Supported); Additional: Endoplasmic reticulum;Plasma membrane	[1-(1-Methyl-4,5-Dioxo-Pent-2-Enylcarbamoyl)-2-Phenyl-Ethyl]-Carbamic Acid Benzyl Ester; [1-(1-Benzyl-3-Hydroxy-2-Oxo-Propylcarbamoyl)-2-Phenyl-Ethyl]-Carbamic Acid Benzyl Ester; 4-Morpholin-4-Yl-Piperidine-1-Carboxylic Acid [1-(3-Benzenesulfonyl-1-Propyl-Allylcarbamoyl)-2-Phenylethyl]-Amide; Benzyl N-[(2S)-5-(diaminomethylamino)-1-[[(2S)-4-fluoro-3-oxobutan-2-yl]amino]-1-oxopentan-2-yl]carbamate…	(M3468)NABA ECM REGULATORS; (M5885)NABA MATRISOME ASSOCIATED; (M5889)NABA MATRISOME	(M5939)HALLMARK P53 PATHWAY	1.0	0.0	0.0	0.0	0.0	0.0	0.0	0.0	0.0	0.0	0.0	0.0	0.0	0.0	0.0	0.0	0.0	0.0	0.0	0.0
CYP26B1	56603	symbol	H. sapiens	56603	H. sapiens	CYP26B1	cytochrome P450 family 26 subfamily B member 1	GO:2001035 regulation of tongue muscle cell differentiation;GO:2001037 positive regulation of tongue muscle cell differentiation;GO:1902811 positive regulation of skeletal muscle fiber differentiation		Predicted intracellular proteins; Disease related genes	Cytosol (Approved)	Tretinoin		(M5906)HALLMARK ESTROGEN RESPONSE EARLY; (M5907)HALLMARK ESTROGEN RESPONSE LATE	0.0	1.0	1.0	0.0	1.0	0.0	1.0	1.0	0.0	0.0	0.0	0.0	1.0	0.0	0.0	0.0	0.0	0.0	0.0	0.0
PVRL3	25945	gene_synonym	H. sapiens	25945	H. sapiens	NECTIN3	nectin cell adhesion molecule 3	GO:0002089 lens morphogenesis in camera-type eye;GO:0007157 heterophilic cell-cell adhesion via plasma membrane cell adhesion molecules;GO:0061951 establishment of protein localization to plasma membrane		Predicted intracellular proteins; CD markers	Cytosol (Approved); Additional: Cell Junctions		(M72)PID NECTIN PATHWAY	(M5915)HALLMARK APICAL JUNCTION	0.0	0.0	0.0	0.0	1.0	0.0	0.0	0.0	0.0	0.0	0.0	0.0	0.0	0.0	0.0	0.0	0.0	0.0	0.0	0.0
CTSS	1520	symbol	H. sapiens	1520	H. sapiens	CTSS	cathepsin S	GO:0034769 basement membrane disassembly;GO:0097067 cellular response to thyroid hormone stimulus;GO:0071711 basement membrane organization		Enzymes; ENZYME proteins:Hydrolases; Predicted intracellular proteins; Peptidases:Cysteine-type peptidases	Vesicles (Approved)	Morpholine-4-Carboxylic Acid [1s-(2-Benzyloxy-1r-Cyano-Ethylcarbamoyl)-3-Methyl-Butyl]Amide; Morpholine-4-Carboxylic Acid (1-(3-Benzenesulfonyl-1-Phenethylallylcarbamoyl)-3-Methylbutyl)-Amide; Morpholine-4-Carboxylic Acid [1-(2-Benzylsulfanyl-1-Formyl-Ethylcarbamoyl)-2-Phenyl-Ethyl]-Amide; N-[1-(AMINOMETHYL)CYCLOPROPYL]-3-(MORPHOLIN-4-YLSULFONYL)-N~2~-[(1S)-2,2,2-TRIFLUORO-1-(4-FLUOROPHENYL)ETHYL…	(M3468)NABA ECM REGULATORS; (M5885)NABA MATRISOME ASSOCIATED; (M5889)NABA MATRISOME	(M5921)HALLMARK COMPLEMENT; (M5950)HALLMARK ALLOGRAFT REJECTION; (M5953)HALLMARK KRAS SIGNALING UP	1.0	0.0	1.0	0.0	0.0	0.0	0.0	0.0	0.0	1.0	1.0	0.0	0.0	0.0	0.0	0.0	0.0	0.0	0.0	0.0
DYNLT1	6993	symbol	H. sapiens	6993	H. sapiens	DYNLT1	dynein light chain Tctex-type 1	GO:0075519 microtubule-dependent intracellular transport of viral material;GO:0075521 microtubule-dependent intracellular transport of viral material towards nucleus;GO:0075606 transport of viral material towards nucleus		Predicted intracellular proteins	Nucleoplasm (Approved)		(M163)PID LIS1 PATHWAY; (M187)PID TRKR PATHWAY		0.0	0.0	0.0	0.0	0.0	1.0	0.0	0.0	0.0	1.0	0.0	0.0	0.0	0.0	0.0	0.0	0.0	0.0	0.0	0.0
TMBIM4	51643	symbol	H. sapiens	51643	H. sapiens	TMBIM4	transmembrane BAX inhibitor motif containing 4	GO:0050848 regulation of calcium-mediated signaling;GO:0043066 negative regulation of apoptotic process;GO:0006915 apoptotic process		Transporters:Transporter channels and pores; Predicted intracellular proteins	Golgi apparatus (Supported)				0.0	0.0	0.0	0.0	0.0	0.0	0.0	0.0	0.0	0.0	0.0	0.0	0.0	0.0	0.0	0.0	0.0	0.0	0.0	0.0
AKR1C3	8644	symbol	H. sapiens	8644	H. sapiens	AKR1C3	aldo-keto reductase family 1 member C3	GO:0006714 sesquiterpenoid metabolic process;GO:0016107 sesquiterpenoid catabolic process;GO:0016487 farnesol metabolic process		Enzymes; Predicted intracellular proteins; ENZYME proteins:Oxidoreductases	Cytosol;Nucleoplasm (Approved); Additional: Endoplasmic reticulum;Nucleoli fibrillar center	NADH; Indomethacin; Androstenedione; Rutin; Prostaglandin D2; Flufenamic acid; Nicotinamide adenine dinucleotide phosphate; 3-carboxamido-1,3,5(10)-estratrien-17(R)-spiro-2'(5',5'-dimethyl-6'oxo)tetrahydropyran		(M5934)HALLMARK XENOBIOTIC METABOLISM	0.0	1.0	1.0	0.0	0.0	0.0	1.0	0.0	0.0	0.0	0.0	0.0	1.0	0.0	1.0	1.0	1.0	0.0	0.0	0.0
THRB	7068	symbol	H. sapiens	7068	H. sapiens	THRB	thyroid hormone receptor beta	GO:0097474 retinal cone cell apoptotic process;GO:0002157 positive regulation of thyroid hormone mediated signaling pathway;GO:0008050 female courtship behavior		FDA approved drug targets:Small molecule drugs; Cancer-related genes:Candidate cancer biomarkers; Human disease related genes:Endocrine and metabolic diseases:Thyroid gland diseases; Transcription factors:Zinc-coordinating DNA-binding domains; Disease related genes; Nuclear receptors; Predicted intracellular proteins	Nuclear bodies (Supported)	Liothyronine; Levothyroxine; Dextrothyroxine; Liotrix; [3,5-Dibromo-4-(4-Hydroxy-3-Phenethylcarbamoyl-Phenoxy)-Phenyl]-Acetic Acid; KB-141; 2-[4-(4-Hydroxy-3-Isopropyl-Phenoxy)-3,5-Dimethyl-Phenyl]-2h-[1,2,4]Triazine-3,5-Dione; Tiratricol; GC-24; Eprotirome; MB07811; Sobetirome; 1-(4-HEXYLPHENYL)PROP-2-EN-1-ONE; Thyroid, porcine	(M162)PID RXR VDR PATHWAY	(M5956)HALLMARK KRAS SIGNALING DN	0.0	0.0	1.0	0.0	1.0	0.0	0.0	0.0	0.0	0.0	0.0	0.0	1.0	0.0	0.0	0.0	0.0	0.0	0.0	0.0
AGPAT9	79888	gene_synonym	H. sapiens	79888	H. sapiens	LPCAT1	lysophosphatidylcholine acyltransferase 1	GO:2001246 negative regulation of phosphatidylcholine biosynthetic process;GO:0150174 negative regulation of phosphatidylcholine metabolic process;GO:2001245 regulation of phosphatidylcholine biosynthetic process		Enzymes; ENZYME proteins:Transferases	Endoplasmic reticulum (Supported); Additional: Lipid droplets				0.0	1.0	0.0	0.0	1.0	0.0	1.0	0.0	0.0	1.0	0.0	0.0	0.0	1.0	0.0	0.0	0.0	0.0	0.0	0.0
LPXN	9404	symbol	H. sapiens	9404	H. sapiens	LPXN	leupaxin	GO:0050859 negative regulation of B cell receptor signaling pathway;GO:0050855 regulation of B cell receptor signaling pathway;GO:0050858 negative regulation of antigen receptor-mediated signaling pathway		Predicted intracellular proteins	Focal adhesion sites (Supported); Additional: Cytosol;Nuclear speckles				0.0	0.0	0.0	1.0	0.0	1.0	0.0	0.0	1.0	0.0	0.0	0.0	0.0	1.0	0.0	0.0	0.0	0.0	0.0	0.0
PTGFR	5737	symbol	H. sapiens	5737	H. sapiens	PTGFR	prostaglandin F receptor	GO:0071798 response to prostaglandin D;GO:0071799 cellular response to prostaglandin D stimulus;GO:0007567 parturition		G-protein coupled receptors:GPCRs excl olfactory receptors; FDA approved drug targets:Small molecule drugs		Travoprost; Latanoprost; Bimatoprost; Dinoprost tromethamine; Tafluprost; Latanoprostene bunod		(M5942)HALLMARK UV RESPONSE DN; (M5956)HALLMARK KRAS SIGNALING DN	0.0	1.0	1.0	0.0	0.0	0.0	0.0	0.0	0.0	0.0	0.0	0.0	0.0	0.0	0.0	0.0	0.0	0.0	0.0	0.0
KDM7A	80853	symbol	H. sapiens	80853	H. sapiens	KDM7A	lysine demethylase 7A	GO:0035574 histone H4-K20 demethylation;GO:0071557 histone H3-K27 demethylation;GO:0070544 histone H3-K36 demethylation		Predicted intracellular proteins	Nucleoplasm (Approved); Additional: Nucleoli			(M5945)HALLMARK HEME METABOLISM	0.0	0.0	0.0	0.0	0.0	0.0	0.0	0.0	0.0	0.0	0.0	0.0	0.0	0.0	0.0	0.0	0.0	0.0	0.0	0.0
PDE8A	5151	symbol	H. sapiens	5151	H. sapiens	PDE8A	phosphodiesterase 8A	GO:0006198 cAMP catabolic process;GO:0009214 cyclic nucleotide catabolic process;GO:1903206 negative regulation of hydrogen peroxide-induced cell death		Enzymes; ENZYME proteins:Hydrolases; Predicted intracellular proteins	Golgi apparatus (Approved)	3-isobutyl-1-methyl-7H-xanthine			0.0	0.0	0.0	1.0	0.0	0.0	0.0	0.0	0.0	0.0	0.0	0.0	0.0	0.0	0.0	0.0	0.0	0.0	1.0	0.0
METTL7A	25840	symbol	H. sapiens	25840	H. sapiens	METTL7A	methyltransferase like 7A	GO:0032259 methylation;GO:0008152 metabolic process;GO:0008150 biological_process			Lipid droplets (Supported)				0.0	0.0	0.0	0.0	0.0	0.0	0.0	0.0	0.0	1.0	0.0	0.0	0.0	0.0	0.0	0.0	0.0	0.0	0.0	0.0
SOD3	6649	symbol	H. sapiens	6649	H. sapiens	SOD3	superoxide dismutase 3	GO:0019430 removal of superoxide radicals;GO:0071450 cellular response to oxygen radical;GO:0071451 cellular response to superoxide		Enzymes; Predicted secreted proteins; ENZYME proteins:Oxidoreductases				(M5909)HALLMARK MYOGENESIS	0.0	0.0	0.0	0.0	0.0	1.0	0.0	0.0	0.0	0.0	0.0	0.0	0.0	0.0	0.0	1.0	0.0	0.0	0.0	0.0
C10orf90	118611	symbol	H. sapiens	118611	H. sapiens	C10orf90	chromosome 10 open reading frame 90	GO:0046599 regulation of centriole replication;GO:0010824 regulation of centrosome duplication;GO:0046605 regulation of centrosome cycle		Predicted intracellular proteins	Cytosol;Nucleoplasm;Plasma membrane (Supported)				0.0	0.0	0.0	0.0	0.0	0.0	0.0	0.0	0.0	0.0	0.0	0.0	0.0	0.0	0.0	0.0	0.0	0.0	0.0	0.0
ABHD5	51099	symbol	H. sapiens	51099	H. sapiens	ABHD5	abhydrolase domain containing 5, lysophosphatidic acid acyltransferase	GO:0010891 negative regulation of sequestering of triglyceride;GO:0010898 positive regulation of triglyceride catabolic process;GO:0051006 positive regulation of lipoprotein lipase activity		Peptidases:Serine-type peptidases; Human disease related genes:Congenital disorders of metabolism:Congenital disorders of lipid/glycolipid metabolism; Disease related genes; Potential drug targets; Enzymes; Predicted intracellular proteins; ENZYME proteins:Transferases	Cytosol;Vesicles (Supported); Additional: Nucleoplasm				0.0	1.0	0.0	0.0	0.0	0.0	1.0	0.0	0.0	0.0	0.0	0.0	0.0	0.0	0.0	0.0	0.0	0.0	0.0	0.0
CARD6	84674	symbol	H. sapiens	84674	H. sapiens	CARD6	caspase recruitment domain family member 6	GO:0006915 apoptotic process;GO:0012501 programmed cell death;GO:0008219 cell death		Predicted intracellular proteins					0.0	0.0	0.0	0.0	0.0	0.0	0.0	0.0	0.0	0.0	0.0	0.0	0.0	0.0	0.0	0.0	0.0	0.0	0.0	0.0
PIGW	284098	symbol	H. sapiens	284098	H. sapiens	PIGW	phosphatidylinositol glycan anchor biosynthesis class W	GO:0016254 preassembly of GPI anchor in ER membrane;GO:0006506 GPI anchor biosynthetic process;GO:0006505 GPI anchor metabolic process		Human disease related genes:Congenital disorders of metabolism:Congenital disorders of lipid/glycolipid metabolism; Disease related genes	Plasma membrane (Approved)				0.0	1.0	0.0	0.0	0.0	0.0	0.0	0.0	0.0	0.0	0.0	0.0	0.0	0.0	0.0	0.0	0.0	0.0	0.0	0.0
RBM47	54502	symbol	H. sapiens	54502	H. sapiens	RBM47	RNA binding motif protein 47	GO:0016554 cytidine to uridine editing;GO:0016553 base conversion or substitution editing;GO:0002244 hematopoietic progenitor cell differentiation		Predicted intracellular proteins	Cytosol;Nucleoplasm (Approved)				0.0	0.0	0.0	0.0	0.0	0.0	0.0	0.0	0.0	0.0	0.0	0.0	0.0	0.0	0.0	0.0	0.0	0.0	0.0	0.0
BMPR1B	658	symbol	H. sapiens	658	H. sapiens	BMPR1B	bone morphogenetic protein receptor type 1B	GO:0001550 ovarian cumulus expansion;GO:0048165 fused antrum stage;GO:1902731 negative regulation of chondrocyte proliferation	TKL Ser/Thr protein kinase family	Kinases:TKL Ser/Thr protein kinases; CD markers; Human disease related genes:Congenital malformations:Congenital malformations of the musculoskeletal system; Disease related genes; Potential drug targets; Enzymes; Predicted intracellular proteins; ENZYME proteins:Transferases		Fostamatinib	(M181)PID BMP PATHWAY	(M5908)HALLMARK ANDROGEN RESPONSE; (M5935)HALLMARK FATTY ACID METABOLISM; (M5956)HALLMARK KRAS SIGNALING DN	0.0	0.0	0.0	1.0	1.0	1.0	0.0	1.0	0.0	0.0	0.0	0.0	1.0	0.0	1.0	0.0	1.0	1.0	0.0	0.0
SAT1	6303	symbol	H. sapiens	6303	H. sapiens	SAT1	spermidine/spermine N1-acetyltransferase 1	GO:0009447 putrescine catabolic process;GO:0032917 polyamine acetylation;GO:0032918 spermidine acetylation		Human disease related genes:Congenital malformations:Congenital malformations of skin; Disease related genes; Potential drug targets; Enzymes; Predicted intracellular proteins; ENZYME proteins:Transferases		N-ethyl-N-[3-(propylamino)propyl]propane-1,3-diamine	(M118)PID INTEGRIN A9B1 PATHWAY	(M5908)HALLMARK ANDROGEN RESPONSE; (M5902)HALLMARK APOPTOSIS; (M5890)HALLMARK TNFA SIGNALING VIA NFKB	0.0	1.0	0.0	0.0	0.0	0.0	0.0	0.0	1.0	0.0	0.0	0.0	0.0	0.0	0.0	0.0	0.0	0.0	0.0	0.0
ZEB1	6935	symbol	H. sapiens	6935	H. sapiens	ZEB1	zinc finger E-box binding homeobox 1	GO:0048752 semicircular canal morphogenesis;GO:0060872 semicircular canal development;GO:0045602 negative regulation of endothelial cell differentiation		Human disease related genes:Nervous system diseases:Eye disease; Predicted intracellular proteins; Disease related genes; Transcription factors:Helix-turn-helix domains	Nucleoplasm (Supported); Additional: Nucleoli		(M71)PID ILK PATHWAY	(M5921)HALLMARK COMPLEMENT	0.0	0.0	0.0	1.0	1.0	1.0	1.0	1.0	1.0	0.0	0.0	0.0	1.0	0.0	1.0	0.0	0.0	1.0	0.0	1.0
MOB3B	79817	symbol	H. sapiens	79817	H. sapiens	MOB3B	MOB kinase activator 3B	GO:0035330 regulation of hippo signaling;GO:0032147 activation of protein kinase activity;GO:0045860 positive regulation of protein kinase activity		Predicted intracellular proteins	Cytosol;Intermediate filaments (Uncertain)				0.0	0.0	0.0	1.0	0.0	0.0	0.0	0.0	0.0	0.0	0.0	0.0	0.0	0.0	0.0	0.0	0.0	0.0	0.0	0.0
ABCA13	154664	symbol	H. sapiens	154664	H. sapiens	ABCA13	ATP binding cassette subfamily A member 13	GO:1900244 positive regulation of synaptic vesicle endocytosis;GO:1903423 positive regulation of synaptic vesicle recycling;GO:1900242 regulation of synaptic vesicle endocytosis			Vesicles (Approved); Additional: Centrosome;Cytosol				0.0	0.0	0.0	0.0	0.0	0.0	0.0	0.0	0.0	1.0	0.0	0.0	0.0	0.0	0.0	0.0	0.0	0.0	0.0	0.0
ST3GAL1	6482	symbol	H. sapiens	6482	H. sapiens	ST3GAL1	ST3 beta-galactoside alpha-2,3-sialyltransferase 1	GO:0002319 memory B cell differentiation;GO:1905403 negative regulation of activated CD8-positive, alpha-beta T cell apoptotic process;GO:0090713 immunological memory process		Enzymes; Predicted intracellular proteins; ENZYME proteins:Transferases					0.0	1.0	0.0	0.0	0.0	0.0	0.0	0.0	0.0	0.0	0.0	0.0	0.0	0.0	0.0	0.0	0.0	0.0	0.0	0.0
HTRA1	5654	symbol	H. sapiens	5654	H. sapiens	HTRA1	HtrA serine peptidase 1	GO:0060718 chorionic trophoblast cell differentiation;GO:0097187 dentinogenesis;GO:0060717 chorion development		Human disease related genes:Congenital malformations:Congenital malformations of the nervous system; Predicted secreted proteins; Human disease related genes:Nervous system diseases:Eye disease; Disease related genes; Potential drug targets; Enzymes; Predicted intracellular proteins; Peptidases:Serine-type peptidases	Plasma membrane (Supported)		(M3468)NABA ECM REGULATORS; (M5885)NABA MATRISOME ASSOCIATED; (M5889)NABA MATRISOME	(M5946)HALLMARK COAGULATION; (M5930)HALLMARK EPITHELIAL MESENCHYMAL TRANSITION	1.0	0.0	0.0	1.0	0.0	0.0	0.0	0.0	0.0	0.0	0.0	0.0	1.0	1.0	1.0	0.0	0.0	0.0	0.0	0.0
KCNJ15	3772	symbol	H. sapiens	3772	H. sapiens	KCNJ15	potassium inwardly rectifying channel subfamily J member 15	GO:1990573 potassium ion import across plasma membrane;GO:0098659 inorganic cation import across plasma membrane;GO:0099587 inorganic ion import across plasma membrane		Voltage-gated ion channels:Inwardly Rectifying Potassium Channels; FDA approved drug targets:Small molecule drugs; Predicted intracellular proteins	Plasma membrane (Approved); Additional: Cytosol;Vesicles		(M118)PID INTEGRIN A9B1 PATHWAY		0.0	0.0	0.0	0.0	0.0	0.0	0.0	0.0	0.0	0.0	0.0	0.0	0.0	0.0	0.0	0.0	0.0	0.0	0.0	0.0
LRP4	4038	symbol	H. sapiens	4038	H. sapiens	LRP4	LDL receptor related protein 4	GO:1901629 regulation of presynaptic membrane organization;GO:1901631 positive regulation of presynaptic membrane organization;GO:0051124 synaptic assembly at neuromuscular junction		Transporters; Human disease related genes:Nervous system diseases:Other nervous and sensory system diseases; Human disease related genes:Congenital malformations:Congenital malformations of the musculoskeletal system; Disease related genes; Potential drug targets; Predicted intracellular proteins	Mitochondria;Nucleoli;Nucleoplasm (Uncertain)				1.0	0.0	0.0	1.0	0.0	1.0	0.0	1.0	0.0	0.0	0.0	0.0	0.0	0.0	0.0	0.0	0.0	0.0	0.0	0.0
PITPNC1	26207	symbol	H. sapiens	26207	H. sapiens	PITPNC1	phosphatidylinositol transfer protein cytoplasmic 1	GO:0120009 intermembrane lipid transfer;GO:0015914 phospholipid transport;GO:0015748 organophosphate ester transport		Predicted intracellular proteins	Cytosol (Approved); Additional: Nucleoplasm			(M5939)HALLMARK P53 PATHWAY	0.0	0.0	0.0	0.0	0.0	0.0	0.0	0.0	0.0	0.0	0.0	0.0	0.0	0.0	0.0	0.0	0.0	0.0	0.0	0.0
ZADH2	284273	symbol	H. sapiens	284273	H. sapiens	ZADH2	zinc binding alcohol dehydrogenase domain containing 2	GO:0006692 prostanoid metabolic process;GO:0006693 prostaglandin metabolic process;GO:0045599 negative regulation of fat cell differentiation		Enzymes; Predicted intracellular proteins; ENZYME proteins:Oxidoreductases	Vesicles (Approved); Additional: Golgi apparatus;Nucleoplasm				0.0	1.0	0.0	0.0	0.0	1.0	0.0	0.0	0.0	0.0	0.0	1.0	0.0	0.0	0.0	0.0	0.0	0.0	0.0	0.0
CLIC2	1193	symbol	H. sapiens	1193	H. sapiens	CLIC2	chloride intracellular channel 2	GO:0060315 negative regulation of ryanodine-sensitive calcium-release channel activity;GO:0051280 negative regulation of release of sequestered calcium ion into cytosol;GO:0051284 positive regulation of sequestering of calcium ion		Human disease related genes:Other diseases:Mental and behavioural disorders; Disease related genes; Potential drug targets; Transporters:Transporter channels and pores; Predicted intracellular proteins	Cytosol;Plasma membrane (Supported); Additional: Nucleoplasm			(M5945)HALLMARK HEME METABOLISM	0.0	0.0	0.0	0.0	0.0	0.0	0.0	0.0	0.0	0.0	0.0	0.0	0.0	0.0	0.0	0.0	0.0	0.0	0.0	0.0
TUBD1	51174	symbol	H. sapiens	51174	H. sapiens	TUBD1	tubulin delta 1	GO:0045880 positive regulation of smoothened signaling pathway;GO:0008589 regulation of smoothened signaling pathway;GO:0000226 microtubule cytoskeleton organization		FDA approved drug targets:Small molecule drugs; Predicted intracellular proteins	Cytosol;Nucleoplasm (Approved)	Vinblastine		(M5893)HALLMARK MITOTIC SPINDLE	0.0	0.0	0.0	0.0	0.0	0.0	0.0	0.0	0.0	0.0	0.0	0.0	0.0	0.0	0.0	0.0	0.0	0.0	0.0	0.0
ESYT3	83850	symbol	H. sapiens	83850	H. sapiens	ESYT3	extended synaptotagmin 3	GO:0061817 endoplasmic reticulum-plasma membrane tethering;GO:0051643 endoplasmic reticulum localization;GO:0140056 organelle localization by membrane tethering		Transporters					0.0	1.0	0.0	0.0	0.0	0.0	0.0	0.0	0.0	0.0	0.0	0.0	0.0	0.0	0.0	0.0	0.0	0.0	0.0	0.0
RTTN	25914	symbol	H. sapiens	25914	H. sapiens	RTTN	rotatin	GO:0032053 ciliary basal body organization;GO:0010457 centriole-centriole cohesion;GO:0007099 centriole replication		Human disease related genes:Congenital malformations:Congenital malformations of the nervous system; Predicted intracellular proteins; Disease related genes	Cytosol (Approved); Additional: Centrosome				0.0	0.0	0.0	0.0	0.0	0.0	0.0	1.0	0.0	0.0	0.0	0.0	0.0	0.0	0.0	0.0	0.0	0.0	0.0	0.0
FRAT2	23401	symbol	H. sapiens	23401	H. sapiens	FRAT2	FRAT regulator of WNT signaling pathway 2			Predicted intracellular proteins	Nucleoplasm (Approved); Additional: Mitochondria				0.0	0.0	0.0	0.0	0.0	0.0	0.0	0.0	0.0	0.0	0.0	0.0	0.0	0.0	0.0	0.0	1.0	0.0	0.0	0.0
CDA	978	symbol	H. sapiens	978	H. sapiens	CDA	cytidine deaminase	GO:0071217 cellular response to external biotic stimulus;GO:0019858 cytosine metabolic process;GO:0046898 response to cycloheximide		Enzymes; ENZYME proteins:Hydrolases; FDA approved drug targets:Small molecule drugs; Predicted intracellular proteins	Nucleoplasm (Approved)	1-Beta-Ribofuranosyl-1,3-Diazepinone		(M5898)HALLMARK DNA REPAIR; (M5921)HALLMARK COMPLEMENT; (M5934)HALLMARK XENOBIOTIC METABOLISM	0.0	1.0	0.0	0.0	0.0	1.0	1.0	0.0	0.0	1.0	0.0	0.0	0.0	1.0	0.0	0.0	0.0	0.0	1.0	0.0
DPY19L1	23333	symbol	H. sapiens	23333	H. sapiens	DPY19L1	dpy-19 like C-mannosyltransferase 1	GO:0018103 protein C-linked glycosylation;GO:0018211 peptidyl-tryptophan modification;GO:0018317 protein C-linked glycosylation via tryptophan		Predicted intracellular proteins	Vesicles (Approved)				0.0	0.0	0.0	0.0	0.0	0.0	0.0	0.0	0.0	0.0	0.0	0.0	0.0	0.0	0.0	0.0	0.0	0.0	0.0	0.0
SRRM3	222183	symbol	H. sapiens	222183	H. sapiens	SRRM3	serine/arginine repetitive matrix 3			Predicted intracellular proteins	Plasma membrane (Approved); Additional: Intermediate filaments;Microtubules				0.0	0.0	0.0	0.0	0.0	0.0	0.0	0.0	0.0	0.0	0.0	0.0	0.0	0.0	0.0	0.0	0.0	0.0	0.0	0.0
CLEC2A	387836	symbol	H. sapiens	387836	H. sapiens	CLEC2A	C-type lectin domain family 2 member A	GO:0042267 natural killer cell mediated cytotoxicity;GO:0002228 natural killer cell mediated immunity;GO:0001909 leukocyte mediated cytotoxicity			Plasma membrane (Uncertain)		(M5880)NABA ECM AFFILIATED; (M5885)NABA MATRISOME ASSOCIATED; (M5889)NABA MATRISOME		1.0	0.0	0.0	0.0	0.0	0.0	0.0	0.0	0.0	0.0	0.0	0.0	0.0	0.0	0.0	0.0	0.0	0.0	0.0	0.0
UHRF1BP1L	23074	symbol	H. sapiens	23074	H. sapiens	UHRF1BP1L	UHRF1 binding protein 1 like			Predicted intracellular proteins; Cancer-related genes:Mutational cancer driver genes	Nucleoplasm (Uncertain); Additional: Cytosol;Vesicles				0.0	0.0	0.0	0.0	0.0	0.0	0.0	0.0	0.0	0.0	0.0	0.0	0.0	0.0	0.0	0.0	0.0	0.0	0.0	0.0
LINC00704	100216001	gene_synonym	H. sapiens	100216001	H. sapiens	MANCR	mitotically associated long non coding RNA								0.0	0.0	0.0	0.0	0.0	0.0	0.0	0.0	0.0	0.0	0.0	0.0	0.0	0.0	0.0	0.0	0.0	0.0	0.0	0.0
ARHGEF3	50650	symbol	H. sapiens	50650	H. sapiens	ARHGEF3	Rho guanine nucleotide exchange factor 3	GO:0035025 positive regulation of Rho protein signal transduction;GO:0007266 Rho protein signal transduction;GO:0046579 positive regulation of Ras protein signal transduction		Predicted intracellular proteins	Cytosol (Approved)		(M68)PID RHOA REG PATHWAY	(M5893)HALLMARK MITOTIC SPINDLE	0.0	0.0	0.0	0.0	0.0	0.0	0.0	0.0	0.0	0.0	0.0	0.0	0.0	0.0	0.0	0.0	0.0	0.0	0.0	0.0
EPDR1	54749	symbol	H. sapiens	54749	H. sapiens	EPDR1	ependymin related 1	GO:1990764 myofibroblast contraction;GO:0070252 actin-mediated cell contraction;GO:0030048 actin filament-based movement		Predicted secreted proteins; Predicted intracellular proteins					0.0	0.0	0.0	0.0	0.0	0.0	0.0	0.0	0.0	0.0	0.0	0.0	0.0	0.0	0.0	0.0	0.0	0.0	0.0	0.0
ELK3	2004	symbol	H. sapiens	2004	H. sapiens	ELK3	ETS transcription factor ELK3	GO:0001525 angiogenesis;GO:0042060 wound healing;GO:0048514 blood vessel morphogenesis		Transcription factors:Helix-turn-helix domains; Predicted intracellular proteins; Cancer-related genes:Candidate cancer biomarkers	Nucleoplasm (Supported); Additional: Mitochondria				0.0	0.0	0.0	0.0	0.0	0.0	0.0	0.0	1.0	0.0	0.0	0.0	0.0	0.0	0.0	0.0	0.0	0.0	0.0	0.0
10-Sep						None	None	None	None	None	None	None	None	None	nan	nan	nan	nan	nan	nan	nan	nan	nan	nan	nan	nan	nan	nan	nan	nan	nan	nan	nan	nan
IRAK3	11213	symbol	H. sapiens	11213	H. sapiens	IRAK3	interleukin 1 receptor associated kinase 3	GO:0010932 regulation of macrophage tolerance induction;GO:0010933 positive regulation of macrophage tolerance induction;GO:0010936 negative regulation of macrophage cytokine production	TKL Ser/Thr protein kinase family	Kinases:TKL Ser/Thr protein kinases; Disease related genes; Potential drug targets; Enzymes; Predicted intracellular proteins; ENZYME proteins:Transferases	Vesicles (Approved)	Fostamatinib	(M110)PID IL1 PATHWAY		0.0	0.0	0.0	1.0	0.0	0.0	0.0	0.0	0.0	0.0	0.0	1.0	0.0	1.0	0.0	0.0	0.0	1.0	0.0	0.0
LOC653602	151354	Gene_ID	H. sapiens	151354	H. sapiens	LRATD1	LRAT domain containing 1	GO:0000902 cell morphogenesis;GO:0048870 cell motility;GO:0051674 localization of cell		Predicted intracellular proteins	Nucleoplasm (Approved)				0.0	0.0	0.0	0.0	0.0	1.0	0.0	0.0	0.0	0.0	0.0	0.0	0.0	0.0	0.0	0.0	0.0	0.0	0.0	0.0
BCL6B	255877	symbol	H. sapiens	255877	H. sapiens	BCL6B	BCL6B transcription repressor	GO:0042092 type 2 immune response;GO:0050727 regulation of inflammatory response;GO:0031347 regulation of defense response		Predicted intracellular proteins; Transcription factors:Zinc-coordinating DNA-binding domains	Nucleoplasm (Approved); Additional: Plasma membrane;Vesicles				0.0	0.0	0.0	0.0	0.0	0.0	0.0	0.0	0.0	0.0	0.0	0.0	0.0	0.0	0.0	0.0	0.0	0.0	0.0	0.0
SRPX	8406	symbol	H. sapiens	8406	H. sapiens	SRPX	sushi repeat containing protein X-linked	GO:0060244 negative regulation of cell proliferation involved in contact inhibition;GO:0060242 contact inhibition;GO:0060245 detection of cell density		Predicted secreted proteins			(M3008)NABA ECM GLYCOPROTEINS; (M5884)NABA CORE MATRISOME; (M5889)NABA MATRISOME	(M5916)HALLMARK APICAL SURFACE; (M5891)HALLMARK HYPOXIA	0.0	0.0	0.0	0.0	0.0	0.0	0.0	0.0	0.0	0.0	0.0	0.0	0.0	0.0	1.0	0.0	0.0	0.0	0.0	0.0
ABLIM3	22885	symbol	H. sapiens	22885	H. sapiens	ABLIM3	actin binding LIM protein family member 3	GO:1903955 positive regulation of protein targeting to mitochondrion;GO:0030032 lamellipodium assembly;GO:1903749 positive regulation of establishment of protein localization to mitochondrion		Predicted intracellular proteins	Nucleoplasm;Plasma membrane (Approved); Additional: Cell Junctions				0.0	0.0	0.0	0.0	0.0	1.0	0.0	0.0	0.0	0.0	0.0	0.0	0.0	0.0	0.0	0.0	0.0	0.0	0.0	0.0
CCDC74A	90557	symbol	H. sapiens	90557	H. sapiens	CCDC74A	coiled-coil domain containing 74A			Predicted intracellular proteins	Vesicles (Uncertain)				0.0	0.0	0.0	0.0	0.0	0.0	0.0	0.0	0.0	0.0	0.0	0.0	0.0	0.0	0.0	0.0	0.0	0.0	0.0	0.0
ENPP4	22875	symbol	H. sapiens	22875	H. sapiens	ENPP4	ectonucleotide pyrophosphatase/phosphodiesterase 4	GO:0046130 purine ribonucleoside catabolic process;GO:0006152 purine nucleoside catabolic process;GO:0042454 ribonucleoside catabolic process		Enzymes; ENZYME proteins:Hydrolases					0.0	1.0	0.0	0.0	0.0	0.0	0.0	0.0	0.0	1.0	0.0	0.0	0.0	0.0	0.0	0.0	0.0	0.0	1.0	0.0
NFATC2	4773	symbol	H. sapiens	4773	H. sapiens	NFATC2	nuclear factor of activated T cells 2	GO:0033173 calcineurin-NFAT signaling cascade;GO:1905064 negative regulation of vascular associated smooth muscle cell differentiation;GO:0097720 calcineurin-mediated signaling		Transcription factors:Immunoglobulin fold; Predicted intracellular proteins; Cancer-related genes	Cytosol;Nucleoplasm (Supported)		(M235)PID TCR CALCIUM PATHWAY; (M23)PID WNT NONCANONICAL PATHWAY; (M65)PID FRA PATHWAY		0.0	0.0	0.0	0.0	0.0	1.0	1.0	0.0	0.0	0.0	0.0	0.0	0.0	0.0	0.0	0.0	0.0	0.0	0.0	0.0
CLEC12A	160364	symbol	H. sapiens	160364	H. sapiens	CLEC12A	C-type lectin domain family 12 member A			Predicted intracellular proteins; CD markers			(M5880)NABA ECM AFFILIATED; (M5885)NABA MATRISOME ASSOCIATED; (M5889)NABA MATRISOME		1.0	0.0	0.0	0.0	0.0	0.0	0.0	0.0	0.0	1.0	0.0	0.0	0.0	0.0	0.0	0.0	0.0	0.0	0.0	0.0
IL1R1	3554	symbol	H. sapiens	3554	H. sapiens	IL1R1	interleukin 1 receptor type 1	GO:2000661 positive regulation of interleukin-1-mediated signaling pathway;GO:2000391 positive regulation of neutrophil extravasation;GO:2000389 regulation of neutrophil extravasation		CD markers; Cancer-related genes:Candidate cancer biomarkers; Human disease related genes:Immune system diseases:Allergies and autoimmune diseases; ENZYME proteins:Hydrolases; Transporters:Accessory Factors Involved in Transport; Human disease related genes:Skin diseases:Skin and soft tissue diseases; Predicted secreted proteins; FDA approved drug targets:Biotech drugs; Enzymes	Nucleoplasm;Vesicles (Approved); Additional: Cytosol;Plasma membrane	Anakinra; SD118; OMS-103HP; Foreskin fibroblast (neonatal)	(M110)PID IL1 PATHWAY; (M54)PID IL12 2PATHWAY	(M5897)HALLMARK IL6 JAK STAT3 SIGNALING; (M5932)HALLMARK INFLAMMATORY RESPONSE; (M5934)HALLMARK XENOBIOTIC METABOLISM	0.0	0.0	0.0	1.0	0.0	0.0	0.0	0.0	0.0	0.0	0.0	0.0	0.0	0.0	0.0	0.0	1.0	1.0	0.0	0.0

## Sheet: Enrichment
GroupID	Category	Term	Description	LogP	Log(q-value)	InTerm_InList	Genes	Symbols
1_Summary	Canonical Pathways	M5885	NABA MATRISOME ASSOCIATED	-12.3179	-7.9712	26/751	308,1520,2252,2258,3557,4313,4314,4319,4321,5155,5176,5271,5648,5654,6423,8722,10344,10507,23452,25891,80760,114897,135228,160364,283208,387836,1305,3791,4038,91522,2852	ANXA5,CTSS,FGF7,FGF13,IL1RN,MMP2,MMP3,MMP10,MMP12,PDGFB,SERPINF1,SERPINB8,MASP1,HTRA1,SFRP2,CTSF,CCL26,SEMA4D,ANGPTL2,PAMR1,ITIH5,C1QTNF1,CD109,CLEC12A,P4HA3,CLEC2A,COL13A1,KDR,LRP4,COL23A1,GPER1
1_Member	Canonical Pathways	M5885	NABA MATRISOME ASSOCIATED	-12.3179	-7.9712	26/751	308,1520,2252,2258,3557,4313,4314,4319,4321,5155,5176,5271,5648,5654,6423,8722,10344,10507,23452,25891,80760,114897,135228,160364,283208,387836	ANXA5,CTSS,FGF7,FGF13,IL1RN,MMP2,MMP3,MMP10,MMP12,PDGFB,SERPINF1,SERPINB8,MASP1,HTRA1,SFRP2,CTSF,CCL26,SEMA4D,ANGPTL2,PAMR1,ITIH5,C1QTNF1,CD109,CLEC12A,P4HA3,CLEC2A
1_Member	Canonical Pathways	M3468	NABA ECM REGULATORS	-9.74301	-5.69736	14/238	1520,4313,4314,4319,4321,5176,5271,5648,5654,8722,25891,80760,135228,283208	CTSS,MMP2,MMP3,MMP10,MMP12,SERPINF1,SERPINB8,MASP1,HTRA1,CTSF,PAMR1,ITIH5,CD109,P4HA3
1_Member	Reactome Gene Sets	R-HSA-1474244	Extracellular matrix organization	-6.5666	-2.82198	12/301	1305,1520,3791,4038,4313,4314,4319,4321,5155,5654,91522,283208	COL13A1,CTSS,KDR,LRP4,MMP2,MMP3,MMP10,MMP12,PDGFB,HTRA1,COL23A1,P4HA3
1_Member	Reactome Gene Sets	R-HSA-1474228	Degradation of the extracellular matrix	-5.70049	-2.41181	8/140	1305,1520,4313,4314,4319,4321,5654,91522	COL13A1,CTSS,MMP2,MMP3,MMP10,MMP12,HTRA1,COL23A1
1_Member	Reactome Gene Sets	R-HSA-1442490	Collagen degradation	-5.64921	-2.41181	6/64	1305,4313,4314,4319,4321,91522	COL13A1,MMP2,MMP3,MMP10,MMP12,COL23A1
1_Member	GO Biological Processes	GO:0030574	collagen catabolic process	-5.52907	-2.35564	5/38	1520,4313,4314,4319,4321	CTSS,MMP2,MMP3,MMP10,MMP12
1_Member	GO Biological Processes	GO:0022617	extracellular matrix disassembly	-5.10942	-2.08495	5/46	1520,4313,4314,4319,4321	CTSS,MMP2,MMP3,MMP10,MMP12
1_Member	GO Biological Processes	GO:0032963	collagen metabolic process	-4.61025	-1.76872	5/58	1520,4313,4314,4319,4321	CTSS,MMP2,MMP3,MMP10,MMP12
1_Member	WikiPathways	WP129	Matrix metalloproteinases	-4.53833	-1.74795	4/30	4313,4314,4319,4321	MMP2,MMP3,MMP10,MMP12
1_Member	GO Biological Processes	GO:0030198	extracellular matrix organization	-3.7021	-1.18947	8/266	1305,1520,4313,4314,4319,4321,6423,91522	COL13A1,CTSS,MMP2,MMP3,MMP10,MMP12,SFRP2,COL23A1
1_Member	GO Biological Processes	GO:0043062	extracellular structure organization	-3.69106	-1.18947	8/267	1305,1520,4313,4314,4319,4321,6423,91522	COL13A1,CTSS,MMP2,MMP3,MMP10,MMP12,SFRP2,COL23A1
1_Member	GO Biological Processes	GO:0045229	external encapsulating structure organization	-3.66912	-1.18711	8/269	1305,1520,4313,4314,4319,4321,6423,91522	COL13A1,CTSS,MMP2,MMP3,MMP10,MMP12,SFRP2,COL23A1
1_Member	Reactome Gene Sets	R-HSA-1592389	Activation of Matrix Metalloproteinases	-3.00917	-0.787885	3/33	4313,4314,4319	MMP2,MMP3,MMP10
1_Member	GO Biological Processes	GO:1904645	response to amyloid-beta	-2.36854	-0.390048	3/55	4313,4314,4321	MMP2,MMP3,MMP12
1_Member	GO Biological Processes	GO:0022411	cellular component disassembly	-2.11971	-0.260166	6/288	1520,2852,4313,4314,4319,4321	CTSS,GPER1,MMP2,MMP3,MMP10,MMP12
2_Summary	WikiPathways	WP98	Prostaglandin synthesis and regulation	-6.57277	-2.82198	6/45	308,1645,1646,5737,5742,8644,80270,284273,2308,5166,6303,51703,9745,56603,220,5919,978,22875,51099,2852,3557,6659,114897,133308,5176,5244,8029,79611,79888,83850,4314,5155,4313,6801,3092,6482,284098	ANXA5,AKR1C1,AKR1C2,PTGFR,PTGS1,AKR1C3,HSD3B7,ZADH2,FOXO1,PDK4,SAT1,ACSL5,ZNF536,CYP26B1,ALDH1A3,RARRES2,CDA,ENPP4,ABHD5,GPER1,IL1RN,SOX4,C1QTNF1,SLC9B2,SERPINF1,ABCB4,CUBN,ACSS3,LPCAT1,ESYT3,MMP3,PDGFB,MMP2,STRN,HIP1,ST3GAL1,PIGW
2_Member	WikiPathways	WP98	Prostaglandin synthesis and regulation	-6.57277	-2.82198	6/45	308,1645,1646,5737,5742,8644	ANXA5,AKR1C1,AKR1C2,PTGFR,PTGS1,AKR1C3
2_Member	GO Biological Processes	GO:0009753	response to jasmonic acid	-6.08905	-2.64545	3/4	1645,1646,8644	AKR1C1,AKR1C2,AKR1C3
2_Member	GO Biological Processes	GO:0071395	cellular response to jasmonic acid stimulus	-6.08905	-2.64545	3/4	1645,1646,8644	AKR1C1,AKR1C2,AKR1C3
2_Member	GO Biological Processes	GO:0071798	response to prostaglandin D	-6.08905	-2.64545	3/4	1646,5737,8644	AKR1C2,PTGFR,AKR1C3
2_Member	GO Biological Processes	GO:0071799	cellular response to prostaglandin D stimulus	-6.08905	-2.64545	3/4	1646,5737,8644	AKR1C2,PTGFR,AKR1C3
2_Member	Reactome Gene Sets	R-HSA-193775	Synthesis of bile acids and bile salts via 24-hydroxycholesterol	-5.94354	-2.5511	4/14	1645,1646,8644,80270	AKR1C1,AKR1C2,AKR1C3,HSD3B7
2_Member	Reactome Gene Sets	R-HSA-193807	Synthesis of bile acids and bile salts via 27-hydroxycholesterol	-5.81086	-2.46417	4/15	1645,1646,8644,80270	AKR1C1,AKR1C2,AKR1C3,HSD3B7
2_Member	GO Biological Processes	GO:0006692	prostanoid metabolic process	-5.47157	-2.35533	5/39	1645,1646,5742,8644,284273	AKR1C1,AKR1C2,PTGS1,AKR1C3,ZADH2
2_Member	GO Biological Processes	GO:0006693	prostaglandin metabolic process	-5.47157	-2.35533	5/39	1645,1646,5742,8644,284273	AKR1C1,AKR1C2,PTGS1,AKR1C3,ZADH2
2_Member	Reactome Gene Sets	R-HSA-193368	Synthesis of bile acids and bile salts via 7alpha-hydroxycholesterol	-4.93773	-1.95277	4/24	1645,1646,8644,80270	AKR1C1,AKR1C2,AKR1C3,HSD3B7
2_Member	GO Biological Processes	GO:0044597	daunorubicin metabolic process	-4.77633	-1.86101	3/9	1645,1646,8644	AKR1C1,AKR1C2,AKR1C3
2_Member	WikiPathways	WP696	Benzo(a)pyrene metabolism	-4.77633	-1.86101	3/9	1645,1646,8644	AKR1C1,AKR1C2,AKR1C3
2_Member	GO Biological Processes	GO:0030638	polyketide metabolic process	-4.62333	-1.76872	3/10	1645,1646,8644	AKR1C1,AKR1C2,AKR1C3
2_Member	GO Biological Processes	GO:0030647	aminoglycoside antibiotic metabolic process	-4.62333	-1.76872	3/10	1645,1646,8644	AKR1C1,AKR1C2,AKR1C3
2_Member	GO Biological Processes	GO:0044598	doxorubicin metabolic process	-4.62333	-1.76872	3/10	1645,1646,8644	AKR1C1,AKR1C2,AKR1C3
2_Member	GO Biological Processes	GO:0070542	response to fatty acid	-4.43482	-1.6792	5/63	1645,1646,2308,5166,8644	AKR1C1,AKR1C2,FOXO1,PDK4,AKR1C3
2_Member	WikiPathways	WP4313	Ferroptosis	-4.33674	-1.60284	5/66	1645,1646,6303,8644,51703	AKR1C1,AKR1C2,SAT1,AKR1C3,ACSL5
2_Member	Reactome Gene Sets	R-HSA-192105	Synthesis of bile acids and bile salts	-4.3179	-1.59446	4/34	1645,1646,8644,80270	AKR1C1,AKR1C2,AKR1C3,HSD3B7
2_Member	GO Biological Processes	GO:0071398	cellular response to fatty acid	-4.2672	-1.55398	4/35	1645,1646,5166,8644	AKR1C1,AKR1C2,PDK4,AKR1C3
2_Member	GO Biological Processes	GO:0042448	progesterone metabolic process	-4.25184	-1.5486	3/13	1645,1646,8644	AKR1C1,AKR1C2,AKR1C3
2_Member	GO Biological Processes	GO:1902644	tertiary alcohol metabolic process	-4.05398	-1.41487	3/15	1645,1646,8644	AKR1C1,AKR1C2,AKR1C3
2_Member	GO Biological Processes	GO:0048385	regulation of retinoic acid receptor signaling pathway	-3.9657	-1.35141	3/16	8644,9745,56603	AKR1C3,ZNF536,CYP26B1
2_Member	Reactome Gene Sets	R-HSA-5362517	Signaling by Retinoic Acid	-3.91089	-1.31316	4/43	220,5166,8644,56603	ALDH1A3,PDK4,AKR1C3,CYP26B1
2_Member	GO Biological Processes	GO:0001523	retinoid metabolic process	-3.86026	-1.28443	5/83	220,1645,5919,8644,56603	ALDH1A3,AKR1C1,RARRES2,AKR1C3,CYP26B1
2_Member	Reactome Gene Sets	R-HSA-194068	Bile acid and bile salt metabolism	-3.83308	-1.27086	4/45	1645,1646,8644,80270	AKR1C1,AKR1C2,AKR1C3,HSD3B7
2_Member	GO Biological Processes	GO:0016101	diterpenoid metabolic process	-3.78748	-1.23319	5/86	220,1645,5919,8644,56603	ALDH1A3,AKR1C1,RARRES2,AKR1C3,CYP26B1
2_Member	GO Biological Processes	GO:0042574	retinal metabolic process	-3.73325	-1.19948	3/19	220,1645,8644	ALDH1A3,AKR1C1,AKR1C3
2_Member	GO Biological Processes	GO:1901657	glycosyl compound metabolic process	-3.71747	-1.19244	5/89	978,1645,1646,8644,22875	CDA,AKR1C1,AKR1C2,AKR1C3,ENPP4
2_Member	GO Biological Processes	GO:0071379	cellular response to prostaglandin stimulus	-3.66456	-1.18711	3/20	1646,5737,8644	AKR1C2,PTGFR,AKR1C3
2_Member	GO Biological Processes	GO:0006721	terpenoid metabolic process	-3.54295	-1.12047	5/97	220,1645,5919,8644,56603	ALDH1A3,AKR1C1,RARRES2,AKR1C3,CYP26B1
2_Member	GO Biological Processes	GO:0016137	glycoside metabolic process	-3.53773	-1.12047	3/22	1645,1646,8644	AKR1C1,AKR1C2,AKR1C3
2_Member	Reactome Gene Sets	R-HSA-5365859	RA biosynthesis pathway	-3.53773	-1.12047	3/22	220,8644,56603	ALDH1A3,AKR1C3,CYP26B1
2_Member	GO Biological Processes	GO:0033559	unsaturated fatty acid metabolic process	-3.42233	-1.03469	5/103	1645,1646,5742,8644,284273	AKR1C1,AKR1C2,PTGS1,AKR1C3,ZADH2
2_Member	GO Biological Processes	GO:0008207	C21-steroid hormone metabolic process	-3.31785	-0.975483	3/26	1645,1646,8644	AKR1C1,AKR1C2,AKR1C3
2_Member	GO Biological Processes	GO:0006690	icosanoid metabolic process	-3.2733	-0.939447	5/111	1645,1646,5742,8644,284273	AKR1C1,AKR1C2,PTGS1,AKR1C3,ZADH2
2_Member	GO Biological Processes	GO:0006720	isoprenoid metabolic process	-3.20328	-0.87778	5/115	220,1645,5919,8644,56603	ALDH1A3,AKR1C1,RARRES2,AKR1C3,CYP26B1
2_Member	GO Biological Processes	GO:0032787	monocarboxylic acid metabolic process	-3.13325	-0.83578	10/491	220,1645,1646,5742,8644,51099,51703,56603,80270,284273	ALDH1A3,AKR1C1,AKR1C2,PTGS1,AKR1C3,ABHD5,ACSL5,CYP26B1,HSD3B7,ZADH2
2_Member	GO Biological Processes	GO:0010817	regulation of hormone levels	-3.09979	-0.819671	10/496	220,1645,1646,2852,3557,6659,8644,56603,114897,133308	ALDH1A3,AKR1C1,AKR1C2,GPER1,IL1RN,SOX4,AKR1C3,CYP26B1,C1QTNF1,SLC9B2
2_Member	GO Biological Processes	GO:0034694	response to prostaglandin	-3.08954	-0.819671	3/31	1646,5737,8644	AKR1C2,PTGFR,AKR1C3
2_Member	GO Biological Processes	GO:0034754	cellular hormone metabolic process	-3.02421	-0.787885	5/126	220,1645,1646,8644,56603	ALDH1A3,AKR1C1,AKR1C2,AKR1C3,CYP26B1
2_Member	GO Biological Processes	GO:1901654	response to ketone	-3.02205	-0.787885	6/189	978,1646,5176,5244,5737,8644	CDA,AKR1C2,SERPINF1,ABCB4,PTGFR,AKR1C3
2_Member	GO Biological Processes	GO:1901661	quinone metabolic process	-2.86316	-0.698319	3/37	1645,1646,8644	AKR1C1,AKR1C2,AKR1C3
2_Member	Reactome Gene Sets	R-HSA-556833	Metabolism of lipids	-2.78348	-0.643624	12/742	1645,1646,5244,5742,8029,8644,51099,51703,79611,79888,80270,83850	AKR1C1,AKR1C2,ABCB4,PTGS1,CUBN,AKR1C3,ABHD5,ACSL5,ACSS3,LPCAT1,HSD3B7,ESYT3
2_Member	GO Biological Processes	GO:0120254	olefinic compound metabolic process	-2.76687	-0.633852	5/144	220,1645,1646,5742,8644	ALDH1A3,AKR1C1,AKR1C2,PTGS1,AKR1C3
2_Member	GO Biological Processes	GO:2000377	regulation of reactive oxygen species metabolic process	-2.72763	-0.607197	5/147	1645,2308,4314,5155,8644	AKR1C1,FOXO1,MMP3,PDGFB,AKR1C3
2_Member	Reactome Gene Sets	R-HSA-9006931	Signaling by Nuclear Receptors	-2.674	-0.570348	7/299	220,4313,4314,5166,6801,8644,56603	ALDH1A3,MMP2,MMP3,PDK4,STRN,AKR1C3,CYP26B1
2_Member	Reactome Gene Sets	R-HSA-8957322	Metabolism of steroids	-2.6519	-0.560485	5/153	1645,1646,8029,8644,80270	AKR1C1,AKR1C2,CUBN,AKR1C3,HSD3B7
2_Member	GO Biological Processes	GO:1901655	cellular response to ketone	-2.63666	-0.556643	4/93	1646,5176,5737,8644	AKR1C2,SERPINF1,PTGFR,AKR1C3
2_Member	GO Biological Processes	GO:0034308	primary alcohol metabolic process	-2.60306	-0.535132	4/95	220,1645,1646,8644	ALDH1A3,AKR1C1,AKR1C2,AKR1C3
2_Member	GO Biological Processes	GO:0019748	secondary metabolic process	-2.51077	-0.472542	3/49	1645,1646,8644	AKR1C1,AKR1C2,AKR1C3
2_Member	GO Biological Processes	GO:0006631	fatty acid metabolic process	-2.47335	-0.450945	7/325	1645,1646,5742,8644,51099,51703,284273	AKR1C1,AKR1C2,PTGS1,AKR1C3,ABHD5,ACSL5,ZADH2
2_Member	GO Biological Processes	GO:0008202	steroid metabolic process	-2.38748	-0.396821	6/253	1645,1646,8029,8644,56603,80270	AKR1C1,AKR1C2,CUBN,AKR1C3,CYP26B1,HSD3B7
2_Member	GO Biological Processes	GO:0006081	cellular aldehyde metabolic process	-2.3037	-0.362968	3/58	220,1645,8644	ALDH1A3,AKR1C1,AKR1C3
2_Member	GO Biological Processes	GO:0051896	regulation of protein kinase B signaling	-2.28051	-0.356082	5/187	1646,2852,3092,8644,114897	AKR1C2,GPER1,HIP1,AKR1C3,C1QTNF1
2_Member	GO Biological Processes	GO:0051897	positive regulation of protein kinase B signaling	-2.25365	-0.346295	4/119	1646,3092,8644,114897	AKR1C2,HIP1,AKR1C3,C1QTNF1
2_Member	KEGG Pathway	hsa00140	Steroid hormone biosynthesis	-2.24248	-0.341395	3/61	1645,1646,8644	AKR1C1,AKR1C2,AKR1C3
2_Member	GO Biological Processes	GO:0042445	hormone metabolic process	-2.17753	-0.288302	5/198	220,1645,1646,8644,56603	ALDH1A3,AKR1C1,AKR1C2,AKR1C3,CYP26B1
2_Member	GO Biological Processes	GO:0008610	lipid biosynthetic process	-2.14506	-0.266724	9/570	220,5742,6482,8644,51099,51703,79888,80270,284098	ALDH1A3,PTGS1,ST3GAL1,AKR1C3,ABHD5,ACSL5,LPCAT1,HSD3B7,PIGW
2_Member	GO Biological Processes	GO:2000379	positive regulation of reactive oxygen species metabolic process	-2.06029	-0.220114	3/71	1645,5155,8644	AKR1C1,PDGFB,AKR1C3
3_Summary	GO Biological Processes	GO:0009725	response to hormone	-5.64455	-2.41181	17/742	717,1520,1645,1646,2308,2852,3557,4313,5166,5176,5737,5919,6781,7068,8644,11031,261729,5244,56603	C2,CTSS,AKR1C1,AKR1C2,FOXO1,GPER1,IL1RN,MMP2,PDK4,SERPINF1,PTGFR,RARRES2,STC1,THRB,AKR1C3,RAB31,STEAP2,ABCB4,CYP26B1
3_Member	GO Biological Processes	GO:0009725	response to hormone	-5.64455	-2.41181	17/742	717,1520,1645,1646,2308,2852,3557,4313,5166,5176,5737,5919,6781,7068,8644,11031,261729	C2,CTSS,AKR1C1,AKR1C2,FOXO1,GPER1,IL1RN,MMP2,PDK4,SERPINF1,PTGFR,RARRES2,STC1,THRB,AKR1C3,RAB31,STEAP2
3_Member	GO Biological Processes	GO:0032870	cellular response to hormone stimulus	-5.2935	-2.22557	13/470	1520,1645,1646,2308,2852,5166,5176,5737,5919,6781,7068,8644,11031	CTSS,AKR1C1,AKR1C2,FOXO1,GPER1,PDK4,SERPINF1,PTGFR,RARRES2,STC1,THRB,AKR1C3,RAB31
3_Member	GO Biological Processes	GO:0071384	cellular response to corticosteroid stimulus	-3.37613	-1.00717	4/59	2852,5176,6781,8644	GPER1,SERPINF1,STC1,AKR1C3
3_Member	GO Biological Processes	GO:0071396	cellular response to lipid	-3.07994	-0.816037	10/499	1645,1646,2852,4313,5166,5176,5244,6781,8644,56603	AKR1C1,AKR1C2,GPER1,MMP2,PDK4,SERPINF1,ABCB4,STC1,AKR1C3,CYP26B1
3_Member	GO Biological Processes	GO:0031960	response to corticosteroid	-2.60333	-0.535132	5/157	2852,3557,5176,6781,8644	GPER1,IL1RN,SERPINF1,STC1,AKR1C3
4_Summary	GO Biological Processes	GO:0051272	positive regulation of cellular component movement	-5.52623	-2.35564	15/596	2252,2852,3554,3791,4313,5155,5919,6615,8829,9423,9638,10344,10507,131578,152007,658,2258,4038,5151,6423,51704,79817,115825,4321,5176,5654,135228,868,2308,11213,55584,114897,220164,5166,80270,9404,6781,6935,90865	FGF7,GPER1,IL1R1,KDR,MMP2,PDGFB,RARRES2,SNAI1,NRP1,NTN1,FEZ1,CCL26,SEMA4D,LRRC15,GLIPR2,BMPR1B,FGF13,LRP4,PDE8A,SFRP2,GPRC5B,MOB3B,WDFY2,MMP12,SERPINF1,HTRA1,CD109,CBLB,FOXO1,IRAK3,CHRNA9,C1QTNF1,DOK6,PDK4,HSD3B7,LPXN,STC1,ZEB1,IL33
4_Member	GO Biological Processes	GO:0051272	positive regulation of cellular component movement	-5.52623	-2.35564	15/596	2252,2852,3554,3791,4313,5155,5919,6615,8829,9423,9638,10344,10507,131578,152007	FGF7,GPER1,IL1R1,KDR,MMP2,PDGFB,RARRES2,SNAI1,NRP1,NTN1,FEZ1,CCL26,SEMA4D,LRRC15,GLIPR2
4_Member	GO Biological Processes	GO:2000147	positive regulation of cell motility	-4.9539	-1.95277	14/584	2252,2852,3554,3791,4313,5155,5919,6615,8829,9423,10344,10507,131578,152007	FGF7,GPER1,IL1R1,KDR,MMP2,PDGFB,RARRES2,SNAI1,NRP1,NTN1,CCL26,SEMA4D,LRRC15,GLIPR2
4_Member	GO Biological Processes	GO:0040017	positive regulation of locomotion	-4.83135	-1.86488	14/599	2252,2852,3554,3791,4313,5155,5919,6615,8829,9423,10344,10507,131578,152007	FGF7,GPER1,IL1R1,KDR,MMP2,PDGFB,RARRES2,SNAI1,NRP1,NTN1,CCL26,SEMA4D,LRRC15,GLIPR2
4_Member	GO Biological Processes	GO:0001934	positive regulation of protein phosphorylation	-4.54377	-1.74795	15/722	658,2252,2258,2852,3791,4038,5151,5155,5919,6423,8829,10507,51704,79817,115825	BMPR1B,FGF7,FGF13,GPER1,KDR,LRP4,PDE8A,PDGFB,RARRES2,SFRP2,NRP1,SEMA4D,GPRC5B,MOB3B,WDFY2
4_Member	GO Biological Processes	GO:0030335	positive regulation of cell migration	-4.4925	-1.72559	13/560	2252,2852,3554,3791,4313,5155,5919,6615,8829,10344,10507,131578,152007	FGF7,GPER1,IL1R1,KDR,MMP2,PDGFB,RARRES2,SNAI1,NRP1,CCL26,SEMA4D,LRRC15,GLIPR2
4_Member	GO Biological Processes	GO:0050678	regulation of epithelial cell proliferation	-4.02376	-1.40135	10/379	2252,3791,4321,5155,5176,5654,6423,8829,10344,135228	FGF7,KDR,MMP12,PDGFB,SERPINF1,HTRA1,SFRP2,NRP1,CCL26,CD109
4_Member	GO Biological Processes	GO:0050730	regulation of peptidyl-tyrosine phosphorylation	-3.75809	-1.21074	8/261	868,2252,4038,5155,6423,8829,10507,51704	CBLB,FGF7,LRP4,PDGFB,SFRP2,NRP1,SEMA4D,GPRC5B
4_Member	GO Biological Processes	GO:0043408	regulation of MAPK cascade	-3.61511	-1.15492	13/686	2308,2852,3791,5151,5155,6423,8829,10344,11213,55584,114897,152007,220164	FOXO1,GPER1,KDR,PDE8A,PDGFB,SFRP2,NRP1,CCL26,IRAK3,CHRNA9,C1QTNF1,GLIPR2,DOK6
4_Member	GO Biological Processes	GO:0050679	positive regulation of epithelial cell proliferation	-3.58373	-1.13467	7/209	2252,3791,4321,5155,5654,8829,10344	FGF7,KDR,MMP12,PDGFB,HTRA1,NRP1,CCL26
4_Member	GO Biological Processes	GO:0070374	positive regulation of ERK1 and ERK2 cascade	-3.44914	-1.05604	7/220	2852,3791,5151,5155,8829,10344,152007	GPER1,KDR,PDE8A,PDGFB,NRP1,CCL26,GLIPR2
4_Member	GO Biological Processes	GO:0070372	regulation of ERK1 and ERK2 cascade	-3.24976	-0.920111	8/311	2852,3791,5151,5155,8829,10344,55584,152007	GPER1,KDR,PDE8A,PDGFB,NRP1,CCL26,CHRNA9,GLIPR2
4_Member	GO Biological Processes	GO:0007169	transmembrane receptor protein tyrosine kinase signaling pathway	-3.14939	-0.848032	9/403	2252,2308,3791,4313,5155,5166,5919,8829,220164	FGF7,FOXO1,KDR,MMP2,PDGFB,PDK4,RARRES2,NRP1,DOK6
4_Member	GO Biological Processes	GO:0006935	chemotaxis	-3.03422	-0.787885	10/506	658,2252,5155,5919,8829,9423,9638,10344,10507,80270	BMPR1B,FGF7,PDGFB,RARRES2,NRP1,NTN1,FEZ1,CCL26,SEMA4D,HSD3B7
4_Member	GO Biological Processes	GO:0007167	enzyme linked receptor protein signaling pathway	-3.01473	-0.787885	11/601	658,2252,2308,3791,4313,5155,5166,5919,8829,9404,220164	BMPR1B,FGF7,FOXO1,KDR,MMP2,PDGFB,PDK4,RARRES2,NRP1,LPXN,DOK6
4_Member	GO Biological Processes	GO:0050731	positive regulation of peptidyl-tyrosine phosphorylation	-3.01022	-0.787885	6/190	2252,4038,5155,8829,10507,51704	FGF7,LRP4,PDGFB,NRP1,SEMA4D,GPRC5B
4_Member	GO Biological Processes	GO:0042330	taxis	-3.00848	-0.787885	10/510	658,2252,5155,5919,8829,9423,9638,10344,10507,80270	BMPR1B,FGF7,PDGFB,RARRES2,NRP1,NTN1,FEZ1,CCL26,SEMA4D,HSD3B7
4_Member	GO Biological Processes	GO:0050921	positive regulation of chemotaxis	-2.8207	-0.66714	5/140	3791,5155,5919,8829,10344	KDR,PDGFB,RARRES2,NRP1,CCL26
4_Member	GO Biological Processes	GO:0010632	regulation of epithelial cell migration	-2.7487	-0.619494	7/290	2252,3791,5155,5176,6781,8829,152007	FGF7,KDR,PDGFB,SERPINF1,STC1,NRP1,GLIPR2
4_Member	GO Biological Processes	GO:0071363	cellular response to growth factor stimulus	-2.726	-0.607197	9/464	658,2252,3791,5151,5155,6935,8829,9404,9638	BMPR1B,FGF7,KDR,PDE8A,PDGFB,ZEB1,NRP1,LPXN,FEZ1
4_Member	GO Biological Processes	GO:0050920	regulation of chemotaxis	-2.63774	-0.556643	6/225	3791,5155,5919,8829,10344,10507	KDR,PDGFB,RARRES2,NRP1,CCL26,SEMA4D
4_Member	GO Biological Processes	GO:0050918	positive chemotaxis	-2.58925	-0.525914	3/46	2252,5155,8829	FGF7,PDGFB,NRP1
4_Member	GO Biological Processes	GO:0043410	positive regulation of MAPK cascade	-2.56752	-0.51087	9/490	2852,3791,5151,5155,8829,10344,114897,152007,220164	GPER1,KDR,PDE8A,PDGFB,NRP1,CCL26,C1QTNF1,GLIPR2,DOK6
4_Member	GO Biological Processes	GO:0070848	response to growth factor	-2.54997	-0.499954	9/493	658,2252,3791,5151,5155,6935,8829,9404,9638	BMPR1B,FGF7,KDR,PDE8A,PDGFB,ZEB1,NRP1,LPXN,FEZ1
4_Member	GO Biological Processes	GO:0010634	positive regulation of epithelial cell migration	-2.41216	-0.409863	5/174	2252,3791,5155,8829,152007	FGF7,KDR,PDGFB,NRP1,GLIPR2
4_Member	GO Biological Processes	GO:0001938	positive regulation of endothelial cell proliferation	-2.36033	-0.390048	4/111	3791,5155,8829,10344	KDR,PDGFB,NRP1,CCL26
4_Member	GO Biological Processes	GO:0032103	positive regulation of response to external stimulus	-2.29889	-0.360442	8/442	3791,4321,5155,5919,8829,10344,51704,90865	KDR,MMP12,PDGFB,RARRES2,NRP1,CCL26,GPRC5B,IL33
5_Summary	GO Biological Processes	GO:0090596	sensory organ morphogenesis	-5.40768	-2.31627	10/261	220,3791,6935,7068,9423,10194,23322,25945,55584,56603,658,5176,8829,79888,1305,5155,5919,6615,144455,2252,4321	ALDH1A3,KDR,ZEB1,THRB,NTN1,TSHZ1,RPGRIP1L,NECTIN3,CHRNA9,CYP26B1,BMPR1B,SERPINF1,NRP1,LPCAT1,COL13A1,PDGFB,RARRES2,SNAI1,E2F7,FGF7,MMP12
5_Member	GO Biological Processes	GO:0090596	sensory organ morphogenesis	-5.40768	-2.31627	10/261	220,3791,6935,7068,9423,10194,23322,25945,55584,56603	ALDH1A3,KDR,ZEB1,THRB,NTN1,TSHZ1,RPGRIP1L,NECTIN3,CHRNA9,CYP26B1
5_Member	GO Biological Processes	GO:0007423	sensory organ development	-5.23827	-2.19262	14/551	220,658,3791,5176,6935,7068,8829,9423,10194,23322,25945,55584,56603,79888	ALDH1A3,BMPR1B,KDR,SERPINF1,ZEB1,THRB,NRP1,NTN1,TSHZ1,RPGRIP1L,NECTIN3,CHRNA9,CYP26B1,LPCAT1
5_Member	GO Biological Processes	GO:0043010	camera-type eye development	-4.66171	-1.76872	10/318	220,658,3791,5176,6935,7068,8829,23322,25945,79888	ALDH1A3,BMPR1B,KDR,SERPINF1,ZEB1,THRB,NRP1,RPGRIP1L,NECTIN3,LPCAT1
5_Member	GO Biological Processes	GO:0060041	retina development in camera-type eye	-4.59678	-1.76861	7/144	658,5176,7068,8829,23322,25945,79888	BMPR1B,SERPINF1,THRB,NRP1,RPGRIP1L,NECTIN3,LPCAT1
5_Member	GO Biological Processes	GO:0001654	eye development	-4.16831	-1.47483	10/364	220,658,3791,5176,6935,7068,8829,23322,25945,79888	ALDH1A3,BMPR1B,KDR,SERPINF1,ZEB1,THRB,NRP1,RPGRIP1L,NECTIN3,LPCAT1
5_Member	GO Biological Processes	GO:0150063	visual system development	-4.12905	-1.4636	10/368	220,658,3791,5176,6935,7068,8829,23322,25945,79888	ALDH1A3,BMPR1B,KDR,SERPINF1,ZEB1,THRB,NRP1,RPGRIP1L,NECTIN3,LPCAT1
5_Member	GO Biological Processes	GO:0048568	embryonic organ development	-4.11199	-1.4555	11/446	220,1305,3791,5155,5919,6615,6935,9423,10194,55584,144455	ALDH1A3,COL13A1,KDR,PDGFB,RARRES2,SNAI1,ZEB1,NTN1,TSHZ1,CHRNA9,E2F7
5_Member	GO Biological Processes	GO:0048880	sensory system development	-4.07114	-1.42342	10/374	220,658,3791,5176,6935,7068,8829,23322,25945,79888	ALDH1A3,BMPR1B,KDR,SERPINF1,ZEB1,THRB,NRP1,RPGRIP1L,NECTIN3,LPCAT1
5_Member	GO Biological Processes	GO:0048593	camera-type eye morphogenesis	-4.04064	-1.40995	6/122	220,3791,6935,7068,23322,25945	ALDH1A3,KDR,ZEB1,THRB,RPGRIP1L,NECTIN3
5_Member	GO Biological Processes	GO:0048592	eye morphogenesis	-3.55121	-1.12047	6/150	220,3791,6935,7068,23322,25945	ALDH1A3,KDR,ZEB1,THRB,RPGRIP1L,NECTIN3
5_Member	GO Biological Processes	GO:0042471	ear morphogenesis	-3.08718	-0.819671	5/122	220,6935,9423,10194,55584	ALDH1A3,ZEB1,NTN1,TSHZ1,CHRNA9
5_Member	GO Biological Processes	GO:0060541	respiratory system development	-2.91817	-0.729843	6/198	220,2252,3791,4321,7068,23322	ALDH1A3,FGF7,KDR,MMP12,THRB,RPGRIP1L
5_Member	GO Biological Processes	GO:0043583	ear development	-2.71638	-0.60014	6/217	220,6935,9423,10194,23322,55584	ALDH1A3,ZEB1,NTN1,TSHZ1,RPGRIP1L,CHRNA9
5_Member	GO Biological Processes	GO:0042472	inner ear morphogenesis	-2.49152	-0.461314	4/102	220,6935,9423,55584	ALDH1A3,ZEB1,NTN1,CHRNA9
5_Member	GO Biological Processes	GO:0060042	retina morphogenesis in camera-type eye	-2.32489	-0.367571	3/57	7068,23322,25945	THRB,RPGRIP1L,NECTIN3
5_Member	GO Biological Processes	GO:0048839	inner ear development	-2.2517	-0.345927	5/190	220,6935,9423,23322,55584	ALDH1A3,ZEB1,NTN1,RPGRIP1L,CHRNA9
6_Summary	GO Biological Processes	GO:0045596	negative regulation of cell differentiation	-4.80757	-1.86101	15/685	2258,2308,2852,4038,4773,5155,6423,6615,6935,6993,8829,9423,9745,10507,284273,222223,684,978,6801,221692,119,4313,6649,10344,81553,658,22885,5176,9638,23072,133308,6781,9404,26499,3791,151354	FGF13,FOXO1,GPER1,LRP4,NFATC2,PDGFB,SFRP2,SNAI1,ZEB1,DYNLT1,NRP1,NTN1,ZNF536,SEMA4D,ZADH2,ELAPOR2,BST2,CDA,STRN,PHACTR1,ADD2,MMP2,SOD3,CCL26,CYRIA,BMPR1B,ABLIM3,SERPINF1,FEZ1,HECW1,SLC9B2,STC1,LPXN,PLEK2,KDR,LRATD1
6_Member	GO Biological Processes	GO:0045596	negative regulation of cell differentiation	-4.80757	-1.86101	15/685	2258,2308,2852,4038,4773,5155,6423,6615,6935,6993,8829,9423,9745,10507,284273	FGF13,FOXO1,GPER1,LRP4,NFATC2,PDGFB,SFRP2,SNAI1,ZEB1,DYNLT1,NRP1,NTN1,ZNF536,SEMA4D,ZADH2
6_Member	GO Biological Processes	GO:0051961	negative regulation of nervous system development	-4.57745	-1.76224	7/145	2258,4038,6993,8829,9423,10507,222223	FGF13,LRP4,DYNLT1,NRP1,NTN1,SEMA4D,ELAPOR2
6_Member	GO Biological Processes	GO:0050771	negative regulation of axonogenesis	-4.40157	-1.65694	5/64	2258,4038,8829,9423,10507	FGF13,LRP4,NRP1,NTN1,SEMA4D
6_Member	GO Biological Processes	GO:0030308	negative regulation of cell growth	-3.89433	-1.31108	7/186	684,978,2258,6423,8829,9423,10507	BST2,CDA,FGF13,SFRP2,NRP1,NTN1,SEMA4D
6_Member	GO Biological Processes	GO:0050768	negative regulation of neurogenesis	-3.71305	-1.19244	6/140	2258,4038,6993,8829,9423,10507	FGF13,LRP4,DYNLT1,NRP1,NTN1,SEMA4D
6_Member	GO Biological Processes	GO:0016358	dendrite development	-3.30939	-0.971303	5/109	4038,6801,8829,9423,221692	LRP4,STRN,NRP1,NTN1,PHACTR1
6_Member	GO Biological Processes	GO:0045926	negative regulation of growth	-3.17113	-0.857867	7/245	684,978,2258,6423,8829,9423,10507	BST2,CDA,FGF13,SFRP2,NRP1,NTN1,SEMA4D
6_Member	GO Biological Processes	GO:0090066	regulation of anatomical structure size	-3.16034	-0.854893	10/487	119,2258,2852,4313,6649,8829,9423,10344,10507,81553	ADD2,FGF13,GPER1,MMP2,SOD3,NRP1,NTN1,CCL26,SEMA4D,CYRIA
6_Member	GO Biological Processes	GO:0010721	negative regulation of cell development	-3.11946	-0.825857	6/181	2258,4038,6993,8829,9423,10507	FGF13,LRP4,DYNLT1,NRP1,NTN1,SEMA4D
6_Member	KEGG Pathway	hsa04360	Axon guidance	-3.10701	-0.820461	6/182	658,4773,8829,9423,10507,22885	BMPR1B,NFATC2,NRP1,NTN1,SEMA4D,ABLIM3
6_Member	GO Biological Processes	GO:0010975	regulation of neuron projection development	-2.94524	-0.744683	9/431	2258,4038,5176,6423,8829,9423,9638,10507,23072	FGF13,LRP4,SERPINF1,SFRP2,NRP1,NTN1,FEZ1,SEMA4D,HECW1
6_Member	GO Biological Processes	GO:0051960	regulation of nervous system development	-2.89009	-0.716587	9/439	2258,2852,4038,5176,6993,8829,9423,10507,222223	FGF13,GPER1,LRP4,SERPINF1,DYNLT1,NRP1,NTN1,SEMA4D,ELAPOR2
6_Member	GO Biological Processes	GO:0010977	negative regulation of neuron projection development	-2.87635	-0.708645	5/136	2258,4038,8829,9423,10507	FGF13,LRP4,NRP1,NTN1,SEMA4D
6_Member	GO Biological Processes	GO:0050767	regulation of neurogenesis	-2.83425	-0.675089	8/361	2258,2852,4038,5176,6993,8829,9423,10507	FGF13,GPER1,LRP4,SERPINF1,DYNLT1,NRP1,NTN1,SEMA4D
6_Member	GO Biological Processes	GO:0030517	negative regulation of axon extension	-2.64474	-0.556643	3/44	8829,9423,10507	NRP1,NTN1,SEMA4D
6_Member	GO Biological Processes	GO:0050770	regulation of axonogenesis	-2.63962	-0.556643	5/154	2258,4038,8829,9423,10507	FGF13,LRP4,NRP1,NTN1,SEMA4D
6_Member	GO Biological Processes	GO:0060284	regulation of cell development	-2.5096	-0.472542	9/500	2258,2852,4038,5176,6993,8829,9423,10507,133308	FGF13,GPER1,LRP4,SERPINF1,DYNLT1,NRP1,NTN1,SEMA4D,SLC9B2
6_Member	GO Biological Processes	GO:0061387	regulation of extent of cell growth	-2.40266	-0.406221	4/108	2258,8829,9423,10507	FGF13,NRP1,NTN1,SEMA4D
6_Member	GO Biological Processes	GO:0000904	cell morphogenesis involved in differentiation	-2.38763	-0.396821	9/522	658,4038,6781,8829,9404,9423,9638,10507,221692	BMPR1B,LRP4,STC1,NRP1,LPXN,NTN1,FEZ1,SEMA4D,PHACTR1
6_Member	GO Biological Processes	GO:0120035	regulation of plasma membrane bounded cell projection organization	-2.38402	-0.395786	10/622	2258,4038,5176,6423,8829,9423,9638,10507,23072,26499	FGF13,LRP4,SERPINF1,SFRP2,NRP1,NTN1,FEZ1,SEMA4D,HECW1,PLEK2
6_Member	GO Biological Processes	GO:0048640	negative regulation of developmental growth	-2.36033	-0.390048	4/111	2258,8829,9423,10507	FGF13,NRP1,NTN1,SEMA4D
6_Member	GO Biological Processes	GO:0031344	regulation of cell projection organization	-2.30311	-0.362968	10/639	2258,4038,5176,6423,8829,9423,9638,10507,23072,26499	FGF13,LRP4,SERPINF1,SFRP2,NRP1,NTN1,FEZ1,SEMA4D,HECW1,PLEK2
6_Member	GO Biological Processes	GO:0032535	regulation of cellular component size	-2.29247	-0.357406	7/351	119,2258,8829,9423,10344,10507,81553	ADD2,FGF13,NRP1,NTN1,CCL26,SEMA4D,CYRIA
6_Member	GO Biological Processes	GO:0031345	negative regulation of cell projection organization	-2.27084	-0.350671	5/188	2258,4038,8829,9423,10507	FGF13,LRP4,NRP1,NTN1,SEMA4D
6_Member	GO Biological Processes	GO:0048813	dendrite morphogenesis	-2.24248	-0.341395	3/61	4038,8829,221692	LRP4,NRP1,PHACTR1
6_Member	GO Biological Processes	GO:1901888	regulation of cell junction assembly	-2.15066	-0.267706	5/201	3791,6615,8829,9423,10507	KDR,SNAI1,NRP1,NTN1,SEMA4D
6_Member	GO Biological Processes	GO:0000902	cell morphogenesis	-2.15042	-0.267706	10/673	658,4038,6781,8829,9404,9423,9638,10507,151354,221692	BMPR1B,LRP4,STC1,NRP1,LPXN,NTN1,FEZ1,SEMA4D,LRATD1,PHACTR1
6_Member	GO Biological Processes	GO:0010720	positive regulation of cell development	-2.05757	-0.218741	6/297	2852,5176,8829,9423,10507,133308	GPER1,SERPINF1,NRP1,NTN1,SEMA4D,SLC9B2
6_Member	GO Biological Processes	GO:0032970	regulation of actin filament-based process	-2.04066	-0.204519	7/392	119,684,2258,6781,8829,10344,81553	ADD2,BST2,FGF13,STC1,NRP1,CCL26,CYRIA
7_Summary	GO Biological Processes	GO:0051055	negative regulation of lipid biosynthetic process	-4.5031	-1.72559	5/61	2852,5155,6615,8644,79888,4773,6935,5166,5919,51099,3791,10507,56603,868,3598,6659,30011,90865,114897,978,2308,90427	GPER1,PDGFB,SNAI1,AKR1C3,LPCAT1,NFATC2,ZEB1,PDK4,RARRES2,ABHD5,KDR,SEMA4D,CYP26B1,CBLB,IL13RA2,SOX4,SH3KBP1,IL33,C1QTNF1,CDA,FOXO1,BMF
7_Member	GO Biological Processes	GO:0051055	negative regulation of lipid biosynthetic process	-4.5031	-1.72559	5/61	2852,5155,6615,8644,79888	GPER1,PDGFB,SNAI1,AKR1C3,LPCAT1
7_Member	GO Biological Processes	GO:0051150	regulation of smooth muscle cell differentiation	-3.91089	-1.31316	4/43	2852,4773,5155,6935	GPER1,NFATC2,PDGFB,ZEB1
7_Member	GO Biological Processes	GO:0045833	negative regulation of lipid metabolic process	-3.38388	-1.00717	5/105	2852,5155,6615,8644,79888	GPER1,PDGFB,SNAI1,AKR1C3,LPCAT1
7_Member	GO Biological Processes	GO:1905063	regulation of vascular associated smooth muscle cell differentiation	-3.31785	-0.975483	3/26	2852,4773,5155	GPER1,NFATC2,PDGFB
7_Member	GO Biological Processes	GO:0046890	regulation of lipid biosynthetic process	-3.19593	-0.874548	6/175	2852,5155,5166,6615,8644,79888	GPER1,PDGFB,PDK4,SNAI1,AKR1C3,LPCAT1
7_Member	GO Biological Processes	GO:0019216	regulation of lipid metabolic process	-3.00747	-0.787885	8/339	2852,5155,5166,5919,6615,8644,51099,79888	GPER1,PDGFB,PDK4,RARRES2,SNAI1,AKR1C3,ABHD5,LPCAT1
7_Member	GO Biological Processes	GO:0014068	positive regulation of phosphatidylinositol 3-kinase signaling	-2.89735	-0.720925	4/79	2852,3791,5155,10507	GPER1,KDR,PDGFB,SEMA4D
7_Member	GO Biological Processes	GO:0051147	regulation of muscle cell differentiation	-2.6519	-0.560485	5/153	2852,4773,5155,6935,56603	GPER1,NFATC2,PDGFB,ZEB1,CYP26B1
7_Member	GO Biological Processes	GO:0050865	regulation of cell activation	-2.5888	-0.525914	11/681	868,2852,3598,4773,5155,6659,6935,30011,56603,90865,114897	CBLB,GPER1,IL13RA2,NFATC2,PDGFB,SOX4,ZEB1,SH3KBP1,CYP26B1,IL33,C1QTNF1
7_Member	GO Biological Processes	GO:0014066	regulation of phosphatidylinositol 3-kinase signaling	-2.36033	-0.390048	4/111	2852,3791,5155,10507	GPER1,KDR,PDGFB,SEMA4D
7_Member	GO Biological Processes	GO:0062012	regulation of small molecule metabolic process	-2.35304	-0.385155	7/342	978,2308,2852,5166,6615,8644,114897	CDA,FOXO1,GPER1,PDK4,SNAI1,AKR1C3,C1QTNF1
7_Member	GO Biological Processes	GO:0006109	regulation of carbohydrate metabolic process	-2.3198	-0.367571	5/183	2308,2852,5155,5166,114897	FOXO1,GPER1,PDGFB,PDK4,C1QTNF1
7_Member	GO Biological Processes	GO:2000351	regulation of endothelial cell apoptotic process	-2.28291	-0.356181	3/59	2852,3791,8644	GPER1,KDR,AKR1C3
7_Member	GO Biological Processes	GO:0010822	positive regulation of mitochondrion organization	-2.04368	-0.206194	3/72	2852,3791,90427	GPER1,KDR,BMF
7_Member	GO Biological Processes	GO:0050866	negative regulation of cell activation	-2.0234	-0.195225	5/216	868,2852,3598,5155,114897	CBLB,GPER1,IL13RA2,PDGFB,C1QTNF1
8_Summary	GO Biological Processes	GO:0007389	pattern specification process	-4.13797	-1.4636	11/443	658,4038,6423,6615,6781,6935,8829,10194,23322,25914,56603,220,4313,6659,9423,55584,5155,5176,2308,23072,51704	BMPR1B,LRP4,SFRP2,SNAI1,STC1,ZEB1,NRP1,TSHZ1,RPGRIP1L,RTTN,CYP26B1,ALDH1A3,MMP2,SOX4,NTN1,CHRNA9,PDGFB,SERPINF1,FOXO1,HECW1,GPRC5B
8_Member	GO Biological Processes	GO:0007389	pattern specification process	-4.13797	-1.4636	11/443	658,4038,6423,6615,6781,6935,8829,10194,23322,25914,56603	BMPR1B,LRP4,SFRP2,SNAI1,STC1,ZEB1,NRP1,TSHZ1,RPGRIP1L,RTTN,CYP26B1
8_Member	GO Biological Processes	GO:0048598	embryonic morphogenesis	-3.74772	-1.20721	12/576	220,4038,4313,6423,6615,6659,6935,9423,10194,23322,55584,56603	ALDH1A3,LRP4,MMP2,SFRP2,SNAI1,SOX4,ZEB1,NTN1,TSHZ1,RPGRIP1L,CHRNA9,CYP26B1
8_Member	GO Biological Processes	GO:0003002	regionalization	-3.06561	-0.808831	8/332	658,4038,6423,6615,8829,10194,23322,56603	BMPR1B,LRP4,SFRP2,SNAI1,NRP1,TSHZ1,RPGRIP1L,CYP26B1
8_Member	GO Biological Processes	GO:0001655	urogenital system development	-3.04884	-0.795577	8/334	4038,4313,5155,5176,6659,8829,23322,56603	LRP4,MMP2,PDGFB,SERPINF1,SOX4,NRP1,RPGRIP1L,CYP26B1
8_Member	GO Biological Processes	GO:0035107	appendage morphogenesis	-2.79356	-0.650999	5/142	4038,6423,6659,23322,56603	LRP4,SFRP2,SOX4,RPGRIP1L,CYP26B1
8_Member	GO Biological Processes	GO:0035108	limb morphogenesis	-2.79356	-0.650999	5/142	4038,6423,6659,23322,56603	LRP4,SFRP2,SOX4,RPGRIP1L,CYP26B1
8_Member	GO Biological Processes	GO:0001822	kidney development	-2.76569	-0.633852	7/288	4038,5155,5176,6659,8829,23322,56603	LRP4,PDGFB,SERPINF1,SOX4,NRP1,RPGRIP1L,CYP26B1
8_Member	GO Biological Processes	GO:0072001	renal system development	-2.69035	-0.582232	7/297	4038,5155,5176,6659,8829,23322,56603	LRP4,PDGFB,SERPINF1,SOX4,NRP1,RPGRIP1L,CYP26B1
8_Member	GO Biological Processes	GO:0048736	appendage development	-2.38074	-0.395786	5/177	4038,6423,6659,23322,56603	LRP4,SFRP2,SOX4,RPGRIP1L,CYP26B1
8_Member	GO Biological Processes	GO:0060173	limb development	-2.38074	-0.395786	5/177	4038,6423,6659,23322,56603	LRP4,SFRP2,SOX4,RPGRIP1L,CYP26B1
8_Member	GO Biological Processes	GO:0060828	regulation of canonical Wnt signaling pathway	-2.32228	-0.367571	6/261	2308,4038,6423,6659,23072,51704	FOXO1,LRP4,SFRP2,SOX4,HECW1,GPRC5B
8_Member	GO Biological Processes	GO:0030326	embryonic limb morphogenesis	-2.25365	-0.346295	4/119	4038,6423,23322,56603	LRP4,SFRP2,RPGRIP1L,CYP26B1
8_Member	GO Biological Processes	GO:0035113	embryonic appendage morphogenesis	-2.25365	-0.346295	4/119	4038,6423,23322,56603	LRP4,SFRP2,RPGRIP1L,CYP26B1
9_Summary	GO Biological Processes	GO:0002009	morphogenesis of an epithelium	-4.13797	-1.4636	11/443	220,2252,3791,4313,4321,6423,6615,6659,8829,9423,23322,6781,2004,2308,5155,6303,7127,144455,6445,8913,6935,1305,9404	ALDH1A3,FGF7,KDR,MMP2,MMP12,SFRP2,SNAI1,SOX4,NRP1,NTN1,RPGRIP1L,STC1,ELK3,FOXO1,PDGFB,SAT1,TNFAIP2,E2F7,SGCG,CACNA1G,ZEB1,COL13A1,LPXN
9_Member	GO Biological Processes	GO:0002009	morphogenesis of an epithelium	-4.13797	-1.4636	11/443	220,2252,3791,4313,4321,6423,6615,6659,8829,9423,23322	ALDH1A3,FGF7,KDR,MMP2,MMP12,SFRP2,SNAI1,SOX4,NRP1,NTN1,RPGRIP1L
9_Member	GO Biological Processes	GO:0048729	tissue morphogenesis	-3.90397	-1.31316	12/554	220,2252,3791,4313,4321,6423,6615,6659,6781,8829,9423,23322	ALDH1A3,FGF7,KDR,MMP2,MMP12,SFRP2,SNAI1,SOX4,STC1,NRP1,NTN1,RPGRIP1L
9_Member	GO Biological Processes	GO:0001568	blood vessel development	-3.65706	-1.18543	11/503	2004,2308,3791,4313,5155,6303,6423,6659,7127,8829,144455	ELK3,FOXO1,KDR,MMP2,PDGFB,SAT1,SFRP2,SOX4,TNFAIP2,NRP1,E2F7
9_Member	GO Biological Processes	GO:0001944	vasculature development	-3.49207	-1.08491	11/526	2004,2308,3791,4313,5155,6303,6423,6659,7127,8829,144455	ELK3,FOXO1,KDR,MMP2,PDGFB,SAT1,SFRP2,SOX4,TNFAIP2,NRP1,E2F7
9_Member	GO Biological Processes	GO:0001525	angiogenesis	-3.16019	-0.854893	8/321	2004,3791,4313,6303,6423,7127,8829,144455	ELK3,KDR,MMP2,SAT1,SFRP2,TNFAIP2,NRP1,E2F7
9_Member	GO Biological Processes	GO:0001569	branching involved in blood vessel morphogenesis	-3.08954	-0.819671	3/31	3791,6423,8829	KDR,SFRP2,NRP1
9_Member	GO Biological Processes	GO:0048514	blood vessel morphogenesis	-3.03055	-0.787885	9/419	2004,3791,4313,6303,6423,6659,7127,8829,144455	ELK3,KDR,MMP2,SAT1,SFRP2,SOX4,TNFAIP2,NRP1,E2F7
9_Member	GO Biological Processes	GO:0007507	heart development	-2.81192	-0.661153	10/542	3791,4313,5155,6423,6445,6615,6659,8829,8913,23322	KDR,MMP2,PDGFB,SFRP2,SGCG,SNAI1,SOX4,NRP1,CACNA1G,RPGRIP1L
9_Member	GO Biological Processes	GO:0035239	tube morphogenesis	-2.68837	-0.582232	11/661	2004,3791,4313,6303,6423,6659,6935,7127,8829,9423,144455	ELK3,KDR,MMP2,SAT1,SFRP2,SOX4,ZEB1,TNFAIP2,NRP1,NTN1,E2F7
9_Member	GO Biological Processes	GO:0001763	morphogenesis of a branching structure	-2.44423	-0.431995	5/171	1305,2252,3791,6423,8829	COL13A1,FGF7,KDR,SFRP2,NRP1
9_Member	GO Biological Processes	GO:0002040	sprouting angiogenesis	-2.28291	-0.356181	3/59	3791,8829,144455	KDR,NRP1,E2F7
9_Member	GO Biological Processes	GO:0043542	endothelial cell migration	-2.1295	-0.263832	3/67	3791,8829,9404	KDR,NRP1,LPXN
10_Summary	Reactome Gene Sets	R-HSA-6798695	Neutrophil degranulation	-3.83222	-1.27086	11/480	684,978,1520,6993,11031,22875,25840,79888,79895,154664,160364	BST2,CDA,CTSS,DYNLT1,RAB31,ENPP4,METTL7A,LPCAT1,ATP8B4,ABCA13,CLEC12A
10_Member	Reactome Gene Sets	R-HSA-6798695	Neutrophil degranulation	-3.83222	-1.27086	11/480	684,978,1520,6993,11031,22875,25840,79888,79895,154664,160364	BST2,CDA,CTSS,DYNLT1,RAB31,ENPP4,METTL7A,LPCAT1,ATP8B4,ABCA13,CLEC12A
11_Summary	Reactome Gene Sets	R-HSA-1474290	Collagen formation	-3.69471	-1.18947	5/90	1305,1520,4314,91522,283208	COL13A1,CTSS,MMP3,COL23A1,P4HA3
11_Member	Reactome Gene Sets	R-HSA-1474290	Collagen formation	-3.69471	-1.18947	5/90	1305,1520,4314,91522,283208	COL13A1,CTSS,MMP3,COL23A1,P4HA3
11_Member	Reactome Gene Sets	R-HSA-1650814	Collagen biosynthesis and modifying enzymes	-2.1295	-0.263832	3/67	1305,91522,283208	COL13A1,COL23A1,P4HA3
12_Summary	GO Biological Processes	GO:0045598	regulation of fat cell differentiation	-3.67964	-1.18711	6/142	2308,2852,5919,6423,115825,284273,4313,4314,4321,5166,5176,11031,6659,11213,55584	FOXO1,GPER1,RARRES2,SFRP2,WDFY2,ZADH2,MMP2,MMP3,MMP12,PDK4,SERPINF1,RAB31,SOX4,IRAK3,CHRNA9
12_Member	GO Biological Processes	GO:0045598	regulation of fat cell differentiation	-3.67964	-1.18711	6/142	2308,2852,5919,6423,115825,284273	FOXO1,GPER1,RARRES2,SFRP2,WDFY2,ZADH2
12_Member	GO Biological Processes	GO:1901652	response to peptide	-2.9244	-0.730003	9/434	2308,2852,4313,4314,4321,5166,5176,5919,11031	FOXO1,GPER1,MMP2,MMP3,MMP12,PDK4,SERPINF1,RARRES2,RAB31
12_Member	GO Biological Processes	GO:0001678	cellular glucose homeostasis	-2.43163	-0.423405	4/106	2308,2852,5176,6659	FOXO1,GPER1,SERPINF1,SOX4
12_Member	GO Biological Processes	GO:0043409	negative regulation of MAPK cascade	-2.36016	-0.390048	5/179	2308,2852,6423,11213,55584	FOXO1,GPER1,SFRP2,IRAK3,CHRNA9
12_Member	GO Biological Processes	GO:0045599	negative regulation of fat cell differentiation	-2.28291	-0.356181	3/59	2308,2852,284273	FOXO1,GPER1,ZADH2
12_Member	GO Biological Processes	GO:0008286	insulin receptor signaling pathway	-2.26251	-0.346295	3/60	2308,5166,5919	FOXO1,PDK4,RARRES2
12_Member	GO Biological Processes	GO:0042593	glucose homeostasis	-2.13302	-0.263832	5/203	2308,2852,5166,5176,6659	FOXO1,GPER1,PDK4,SERPINF1,SOX4
12_Member	GO Biological Processes	GO:0033500	carbohydrate homeostasis	-2.12428	-0.261898	5/204	2308,2852,5166,5176,6659	FOXO1,GPER1,PDK4,SERPINF1,SOX4
13_Summary	GO Biological Processes	GO:0048608	reproductive structure development	-3.67091	-1.18711	10/419	658,3791,4313,5155,5654,6423,6615,6781,8644,144455,1305,56603,6935,1645,1646,6659,7068,8829,10507	BMPR1B,KDR,MMP2,PDGFB,HTRA1,SFRP2,SNAI1,STC1,AKR1C3,E2F7,COL13A1,CYP26B1,ZEB1,AKR1C1,AKR1C2,SOX4,THRB,NRP1,SEMA4D
13_Member	GO Biological Processes	GO:0048608	reproductive structure development	-3.67091	-1.18711	10/419	658,3791,4313,5155,5654,6423,6615,6781,8644,144455	BMPR1B,KDR,MMP2,PDGFB,HTRA1,SFRP2,SNAI1,STC1,AKR1C3,E2F7
13_Member	GO Biological Processes	GO:0061458	reproductive system development	-3.64618	-1.18031	10/422	658,3791,4313,5155,5654,6423,6615,6781,8644,144455	BMPR1B,KDR,MMP2,PDGFB,HTRA1,SFRP2,SNAI1,STC1,AKR1C3,E2F7
13_Member	GO Biological Processes	GO:0060349	bone morphogenesis	-3.54295	-1.12047	5/97	658,1305,6423,6781,56603	BMPR1B,COL13A1,SFRP2,STC1,CYP26B1
13_Member	GO Biological Processes	GO:0048705	skeletal system morphogenesis	-3.39059	-1.00769	7/225	658,1305,4313,6423,6781,6935,56603	BMPR1B,COL13A1,MMP2,SFRP2,STC1,ZEB1,CYP26B1
13_Member	GO Biological Processes	GO:0030855	epithelial cell differentiation	-3.33638	-0.976666	11/549	1645,1646,3791,5155,6659,6781,7068,8644,8829,56603,144455	AKR1C1,AKR1C2,KDR,PDGFB,SOX4,STC1,THRB,AKR1C3,NRP1,CYP26B1,E2F7
13_Member	GO Biological Processes	GO:0001501	skeletal system development	-3.10645	-0.820461	10/495	658,1305,4313,6423,6615,6659,6781,6935,10507,56603	BMPR1B,COL13A1,MMP2,SFRP2,SNAI1,SOX4,STC1,ZEB1,SEMA4D,CYP26B1
13_Member	GO Biological Processes	GO:0060348	bone development	-2.91817	-0.729843	6/198	658,1305,6423,6781,10507,56603	BMPR1B,COL13A1,SFRP2,STC1,SEMA4D,CYP26B1
13_Member	GO Biological Processes	GO:0061448	connective tissue development	-2.80918	-0.661153	6/208	658,5155,6423,6615,6781,6935	BMPR1B,PDGFB,SFRP2,SNAI1,STC1,ZEB1
13_Member	GO Biological Processes	GO:0001890	placenta development	-2.74061	-0.616637	5/146	5155,5654,6615,6781,144455	PDGFB,HTRA1,SNAI1,STC1,E2F7
13_Member	GO Biological Processes	GO:0051216	cartilage development	-2.60333	-0.535132	5/157	658,6423,6615,6781,6935	BMPR1B,SFRP2,SNAI1,STC1,ZEB1
13_Member	GO Biological Processes	GO:0060350	endochondral bone morphogenesis	-2.3465	-0.385126	3/56	658,1305,6781	BMPR1B,COL13A1,STC1
13_Member	GO Biological Processes	GO:0001503	ossification	-2.24425	-0.341395	6/271	658,1305,4313,6615,6781,10507	BMPR1B,COL13A1,MMP2,SNAI1,STC1,SEMA4D
14_Summary	GO Biological Processes	GO:0032102	negative regulation of response to external stimulus	-3.60545	-1.15086	10/427	2852,4321,5155,5176,5654,8829,10507,11213,114897,135228,868,3557,3791,4313,6423,6659,9404,978,79888	GPER1,MMP12,PDGFB,SERPINF1,HTRA1,NRP1,SEMA4D,IRAK3,C1QTNF1,CD109,CBLB,IL1RN,KDR,MMP2,SFRP2,SOX4,LPXN,CDA,LPCAT1
14_Member	GO Biological Processes	GO:0032102	negative regulation of response to external stimulus	-3.60545	-1.15086	10/427	2852,4321,5155,5176,5654,8829,10507,11213,114897,135228	GPER1,MMP12,PDGFB,SERPINF1,HTRA1,NRP1,SEMA4D,IRAK3,C1QTNF1,CD109
14_Member	GO Biological Processes	GO:0030155	regulation of cell adhesion	-2.69734	-0.586182	12/760	868,3557,3791,4313,4321,5155,6423,6659,8829,9404,10507,114897	CBLB,IL1RN,KDR,MMP2,MMP12,PDGFB,SFRP2,SOX4,NRP1,LPXN,SEMA4D,C1QTNF1
14_Member	GO Biological Processes	GO:0007162	negative regulation of cell adhesion	-2.62576	-0.548589	7/305	868,3557,4313,4321,9404,10507,114897	CBLB,IL1RN,MMP2,MMP12,LPXN,SEMA4D,C1QTNF1
14_Member	GO Biological Processes	GO:0045936	negative regulation of phosphate metabolic process	-2.31048	-0.362968	8/440	868,978,5155,6423,10507,11213,79888,135228	CBLB,CDA,PDGFB,SFRP2,SEMA4D,IRAK3,LPCAT1,CD109
14_Member	GO Biological Processes	GO:0010563	negative regulation of phosphorus metabolic process	-2.30467	-0.362968	8/441	868,978,5155,6423,10507,11213,79888,135228	CBLB,CDA,PDGFB,SFRP2,SEMA4D,IRAK3,LPCAT1,CD109
14_Member	GO Biological Processes	GO:0050732	negative regulation of peptidyl-tyrosine phosphorylation	-2.3037	-0.362968	3/58	868,6423,10507	CBLB,SFRP2,SEMA4D
15_Summary	GO Biological Processes	GO:0010942	positive regulation of cell death	-3.55996	-1.12047	12/604	220,658,2308,2852,4313,4314,5654,6423,6659,8406,8644,90427,8829,868,5176,6801,6935,90865,135228,144455	ALDH1A3,BMPR1B,FOXO1,GPER1,MMP2,MMP3,HTRA1,SFRP2,SOX4,SRPX,AKR1C3,BMF,NRP1,CBLB,SERPINF1,STRN,ZEB1,IL33,CD109,E2F7
15_Member	GO Biological Processes	GO:0010942	positive regulation of cell death	-3.55996	-1.12047	12/604	220,658,2308,2852,4313,4314,5654,6423,6659,8406,8644,90427	ALDH1A3,BMPR1B,FOXO1,GPER1,MMP2,MMP3,HTRA1,SFRP2,SOX4,SRPX,AKR1C3,BMF
15_Member	GO Biological Processes	GO:0043065	positive regulation of apoptotic process	-3.47125	-1.06905	11/529	220,658,2308,2852,4313,5654,6423,6659,8406,8644,90427	ALDH1A3,BMPR1B,FOXO1,GPER1,MMP2,HTRA1,SFRP2,SOX4,SRPX,AKR1C3,BMF
15_Member	GO Biological Processes	GO:0043068	positive regulation of programmed cell death	-3.37614	-1.00717	11/543	220,658,2308,2852,4313,5654,6423,6659,8406,8644,90427	ALDH1A3,BMPR1B,FOXO1,GPER1,MMP2,HTRA1,SFRP2,SOX4,SRPX,AKR1C3,BMF
15_Member	GO Biological Processes	GO:2001236	regulation of extrinsic apoptotic signaling pathway	-2.6519	-0.560485	5/153	658,2852,6423,8406,8829	BMPR1B,GPER1,SFRP2,SRPX,NRP1
15_Member	GO Biological Processes	GO:0008285	negative regulation of cell population proliferation	-2.58704	-0.525914	12/784	658,868,2852,5176,6423,6659,6801,6935,8406,90865,135228,144455	BMPR1B,CBLB,GPER1,SERPINF1,SFRP2,SOX4,STRN,ZEB1,SRPX,IL33,CD109,E2F7
15_Member	GO Biological Processes	GO:2001238	positive regulation of extrinsic apoptotic signaling pathway	-2.48578	-0.461314	3/50	658,2852,8406	BMPR1B,GPER1,SRPX
16_Summary	WikiPathways	WP3286	Copper homeostasis	-3.52424	-1.11205	4/54	2308,6649,26872,261729,3791,4313,4314,5176,8644,8913,8989,144402	FOXO1,SOD3,STEAP1,STEAP2,KDR,MMP2,MMP3,SERPINF1,AKR1C3,CACNA1G,TRPA1,CPNE8
16_Member	WikiPathways	WP3286	Copper homeostasis	-3.52424	-1.11205	4/54	2308,6649,26872,261729	FOXO1,SOD3,STEAP1,STEAP2
16_Member	GO Biological Processes	GO:0010035	response to inorganic substance	-2.98935	-0.772995	10/513	2308,3791,4313,4314,5176,6649,8644,8913,8989,144402	FOXO1,KDR,MMP2,MMP3,SERPINF1,SOD3,AKR1C3,CACNA1G,TRPA1,CPNE8
16_Member	GO Biological Processes	GO:0034614	cellular response to reactive oxygen species	-2.27952	-0.356082	4/117	4313,6649,8644,8989	MMP2,SOD3,AKR1C3,TRPA1
16_Member	GO Biological Processes	GO:0034599	cellular response to oxidative stress	-2.00726	-0.181716	5/218	2308,4313,6649,8644,8989	FOXO1,MMP2,SOD3,AKR1C3,TRPA1
17_Summary	WikiPathways	WP5087	Malignant pleural mesothelioma	-3.44848	-1.05604	10/447	2252,2258,2308,3791,4313,4314,5155,5176,6423,23401,658,3554,8644	FGF7,FGF13,FOXO1,KDR,MMP2,MMP3,PDGFB,SERPINF1,SFRP2,FRAT2,BMPR1B,IL1R1,AKR1C3
17_Member	WikiPathways	WP5087	Malignant pleural mesothelioma	-3.44848	-1.05604	10/447	2252,2258,2308,3791,4313,4314,5155,5176,6423,23401	FGF7,FGF13,FOXO1,KDR,MMP2,MMP3,PDGFB,SERPINF1,SFRP2,FRAT2
17_Member	KEGG Pathway	hsa05418	Fluid shear stress and atherosclerosis	-2.83444	-0.675089	5/139	658,3554,3791,4313,5155	BMPR1B,IL1R1,KDR,MMP2,PDGFB
17_Member	GO Biological Processes	GO:0001541	ovarian follicle development	-2.41397	-0.409863	3/53	658,3791,4313	BMPR1B,KDR,MMP2
17_Member	WikiPathways	WP5055	Burn wound healing	-2.37429	-0.391221	4/110	3791,4313,4314,6423	KDR,MMP2,MMP3,SFRP2
17_Member	GO Biological Processes	GO:0042698	ovulation cycle	-2.1295	-0.263832	3/67	658,4313,5176	BMPR1B,MMP2,SERPINF1
17_Member	GO Biological Processes	GO:0008406	gonad development	-2.01531	-0.188449	5/217	658,3791,4313,6423,8644	BMPR1B,KDR,MMP2,SFRP2,AKR1C3
18_Summary	Reactome Gene Sets	R-HSA-449147	Signaling by Interleukins	-3.3366	-0.976666	10/462	2308,3554,3557,3598,4313,4314,6935,11213,58985,90865,684,658,10344,51704,5155	FOXO1,IL1R1,IL1RN,IL13RA2,MMP2,MMP3,ZEB1,IRAK3,IL22RA1,IL33,BST2,BMPR1B,CCL26,GPRC5B,PDGFB
18_Member	Reactome Gene Sets	R-HSA-449147	Signaling by Interleukins	-3.3366	-0.976666	10/462	2308,3554,3557,3598,4313,4314,6935,11213,58985,90865	FOXO1,IL1R1,IL1RN,IL13RA2,MMP2,MMP3,ZEB1,IRAK3,IL22RA1,IL33
18_Member	Canonical Pathways	M110	PID IL1 PATHWAY	-2.97093	-0.764128	3/34	3554,3557,11213	IL1R1,IL1RN,IRAK3
18_Member	WikiPathways	WP4496	Signal transduction through IL1R	-2.9339	-0.736436	3/35	3554,3557,11213	IL1R1,IL1RN,IRAK3
18_Member	GO Biological Processes	GO:0002701	negative regulation of production of molecular mediator of immune response	-2.82933	-0.672976	3/38	684,3598,11213	BST2,IL13RA2,IRAK3
18_Member	KEGG Pathway	hsa04060	Cytokine-cytokine receptor interaction	-2.70684	-0.593151	7/295	658,3554,3557,3598,10344,58985,90865	BMPR1B,IL1R1,IL1RN,IL13RA2,CCL26,IL22RA1,IL33
18_Member	GO Biological Processes	GO:0002718	regulation of cytokine production involved in immune response	-2.55415	-0.501928	4/98	684,3554,11213,51704	BST2,IL1R1,IRAK3,GPRC5B
18_Member	GO Biological Processes	GO:0071347	cellular response to interleukin-1	-2.49152	-0.461314	4/102	3554,4313,10344,11213	IL1R1,MMP2,CCL26,IRAK3
18_Member	GO Biological Processes	GO:0002700	regulation of production of molecular mediator of immune response	-2.48805	-0.461314	5/167	684,3554,3598,11213,51704	BST2,IL1R1,IL13RA2,IRAK3,GPRC5B
18_Member	Reactome Gene Sets	R-HSA-1280215	Cytokine Signaling in Immune system	-2.42895	-0.422708	11/715	684,2308,3554,3557,3598,4313,4314,6935,11213,58985,90865	BST2,FOXO1,IL1R1,IL1RN,IL13RA2,MMP2,MMP3,ZEB1,IRAK3,IL22RA1,IL33
18_Member	GO Biological Processes	GO:0019221	cytokine-mediated signaling pathway	-2.28587	-0.356181	7/352	3554,3598,5155,10344,11213,58985,90865	IL1R1,IL13RA2,PDGFB,CCL26,IRAK3,IL22RA1,IL33
18_Member	WikiPathways	WP5095	Overview of proinflammatory and profibrotic mediators	-2.13149	-0.263832	4/129	3557,4314,10344,90865	IL1RN,MMP3,CCL26,IL33
18_Member	GO Biological Processes	GO:0070555	response to interleukin-1	-2.097	-0.245856	4/132	3554,4313,10344,11213	IL1R1,MMP2,CCL26,IRAK3
19_Summary	GO Biological Processes	GO:1901136	carbohydrate derivative catabolic process	-3.33048	-0.976666	6/165	978,1117,4121,4321,5151,22875	CDA,CHI3L2,MAN1A1,MMP12,PDE8A,ENPP4
19_Member	GO Biological Processes	GO:1901136	carbohydrate derivative catabolic process	-3.33048	-0.976666	6/165	978,1117,4121,4321,5151,22875	CDA,CHI3L2,MAN1A1,MMP12,PDE8A,ENPP4
20_Summary	Reactome Gene Sets	R-HSA-6785807	Interleukin-4 and Interleukin-13 signaling	-3.32772	-0.976666	5/108	2308,3598,4313,4314,6935,5155,1998	FOXO1,IL13RA2,MMP2,MMP3,ZEB1,PDGFB,ELF2
20_Member	Reactome Gene Sets	R-HSA-6785807	Interleukin-4 and Interleukin-13 signaling	-3.32772	-0.976666	5/108	2308,3598,4313,4314,6935	FOXO1,IL13RA2,MMP2,MMP3,ZEB1
20_Member	KEGG Pathway	hsa05215	Prostate cancer	-2.57026	-0.511377	4/97	2308,4314,5155,6935	FOXO1,MMP3,PDGFB,ZEB1
20_Member	Canonical Pathways	M92	PID ANGIOPOIETIN RECEPTOR PATHWAY	-2.51077	-0.472542	3/49	1998,2308,4313	ELF2,FOXO1,MMP2
