# Supplementary figures and images for: Transcriptional profiling of Hutchinson-Gilford Progeria syndrome fibroblasts reveals deficits in mesenchymal stem cell commitment to differentiation related to early events in endochondral ossification (part 1 of 2)
Source: eLife journal article supplement (doi:10.7554/elife.81290), 2022-12-29

A

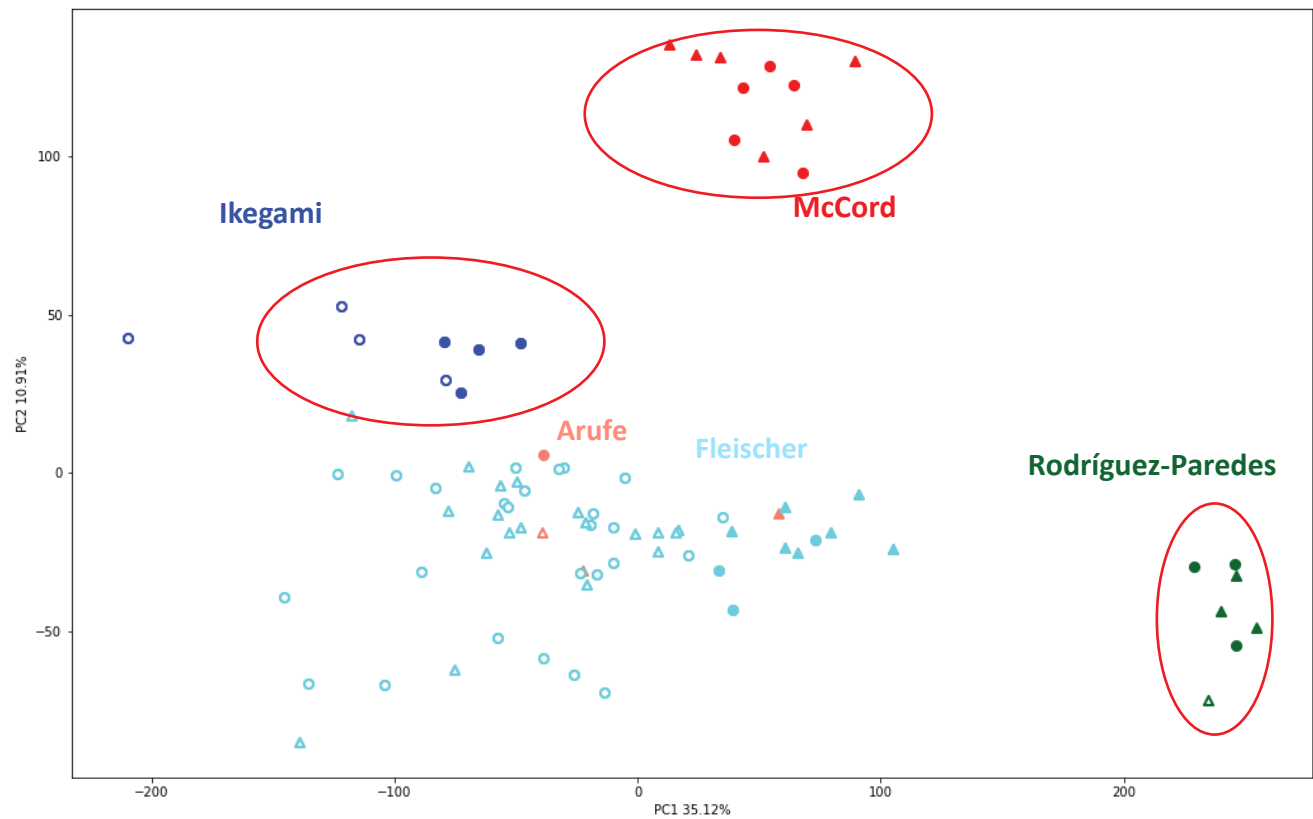

B

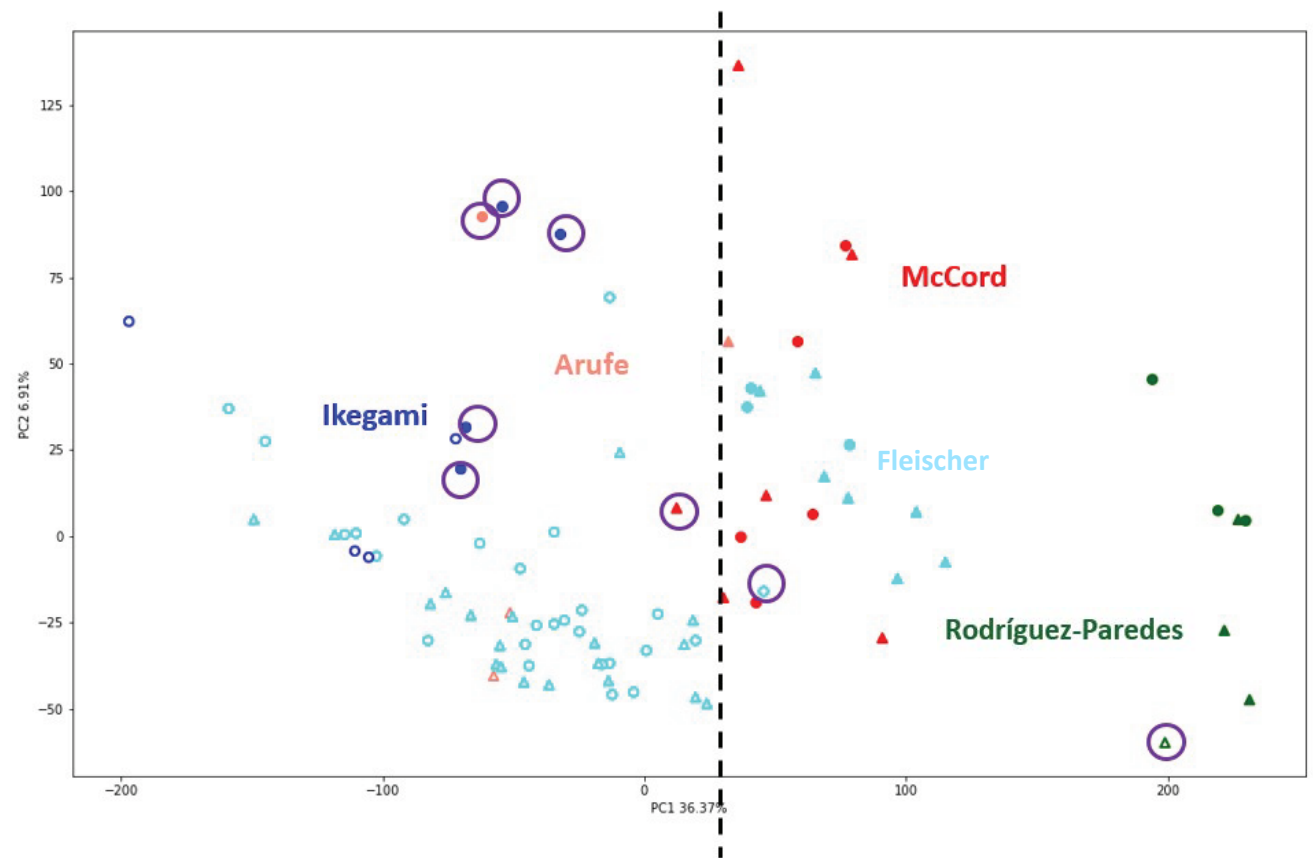

Supplement: supp [file elife-81290-supp-v1.zip]

A

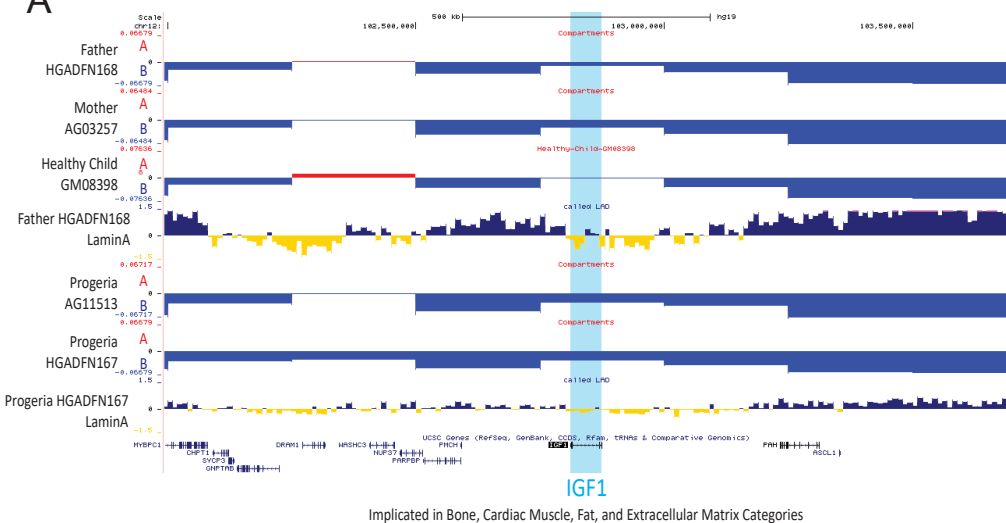

B

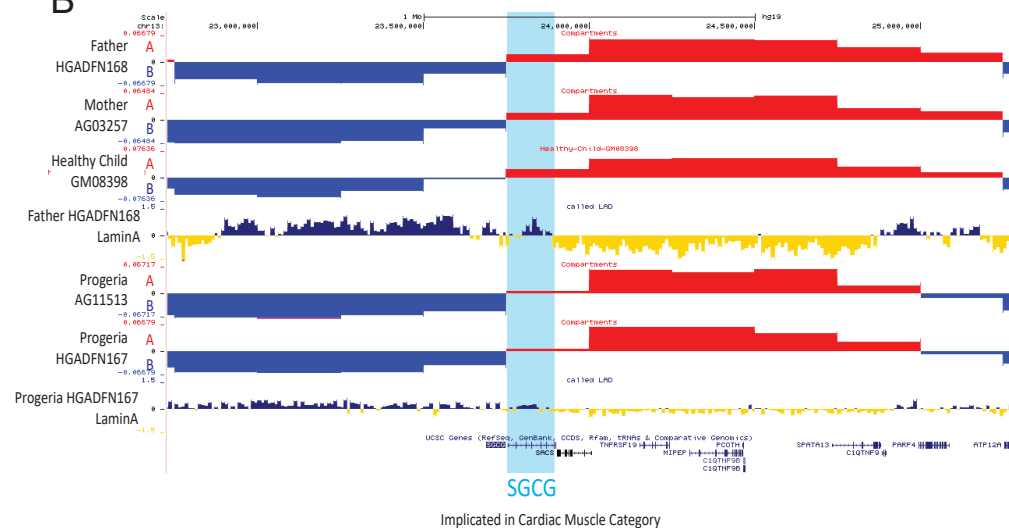

C

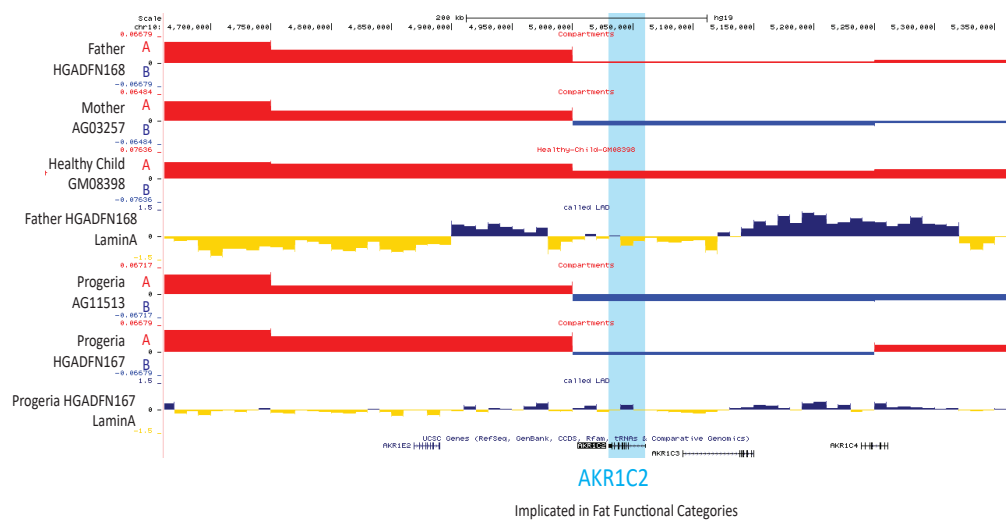

D

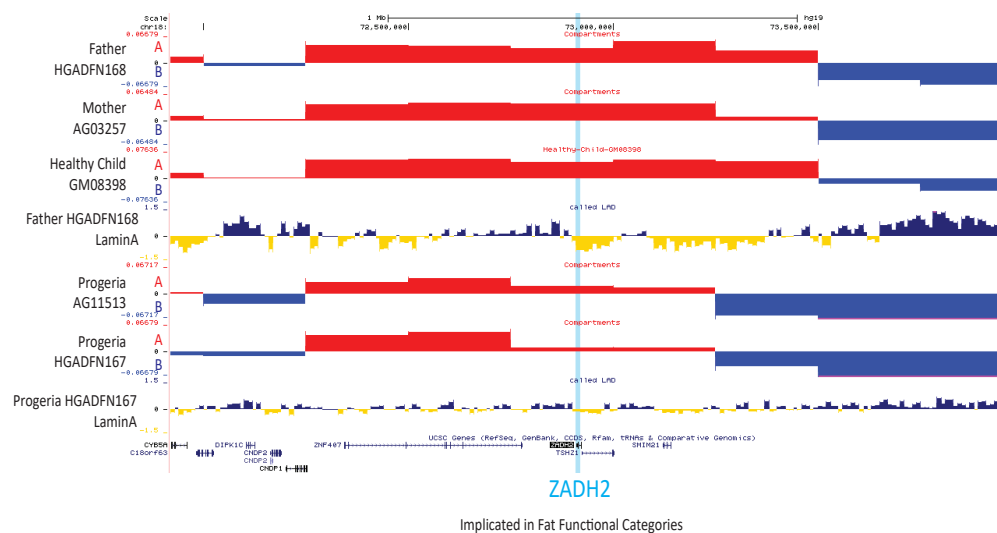

Supplement: supp [file elife-81290-supp-v1.zip]

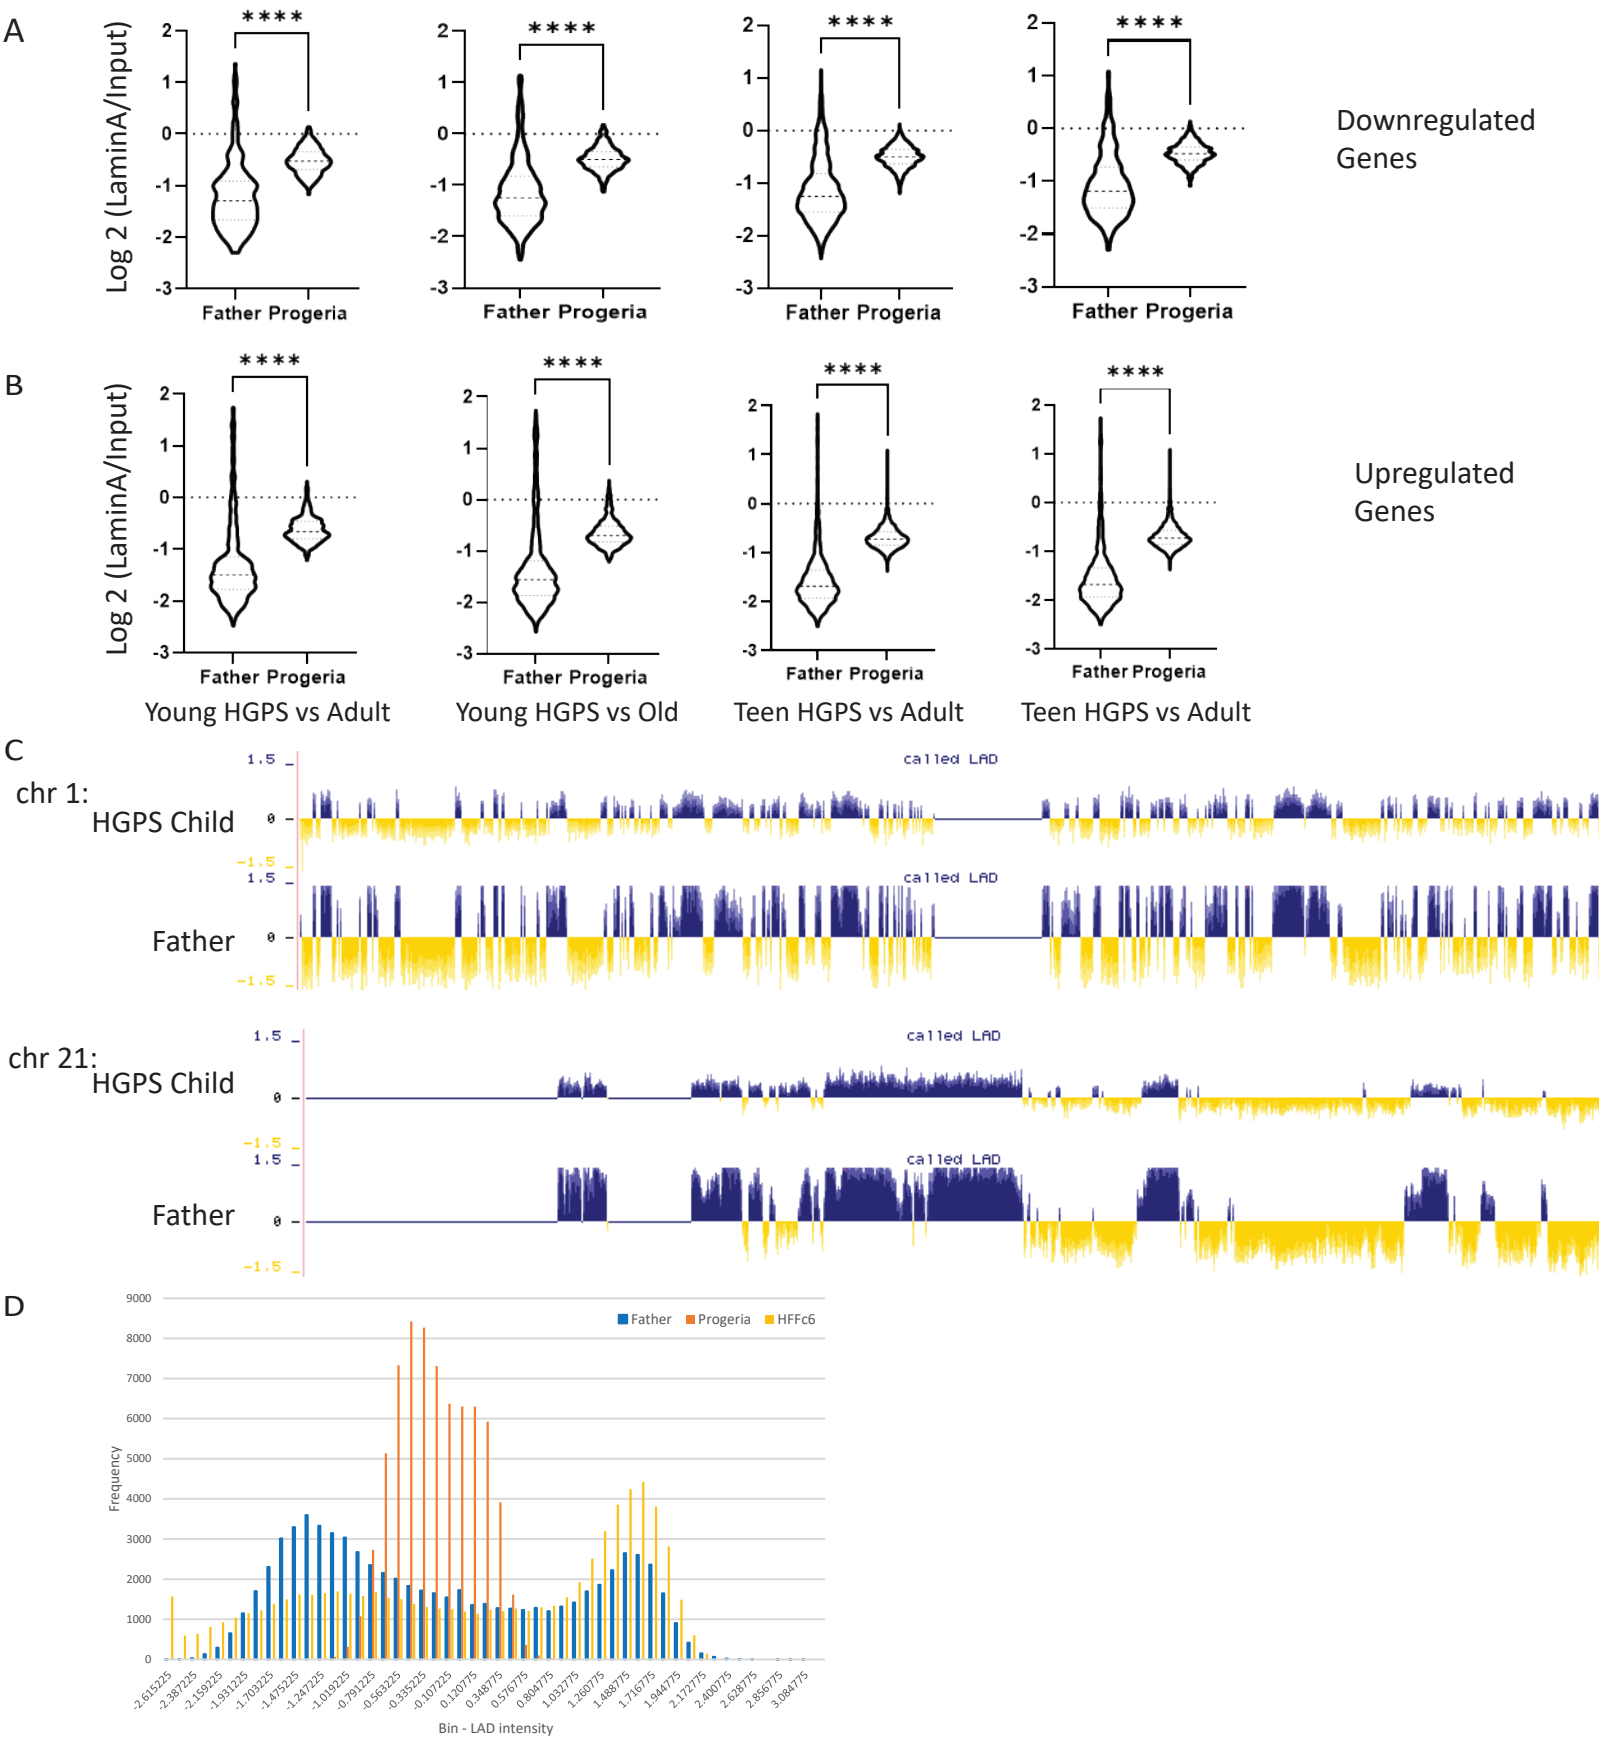

Supplement: supp [file elife-81290-supp-v1.zip]

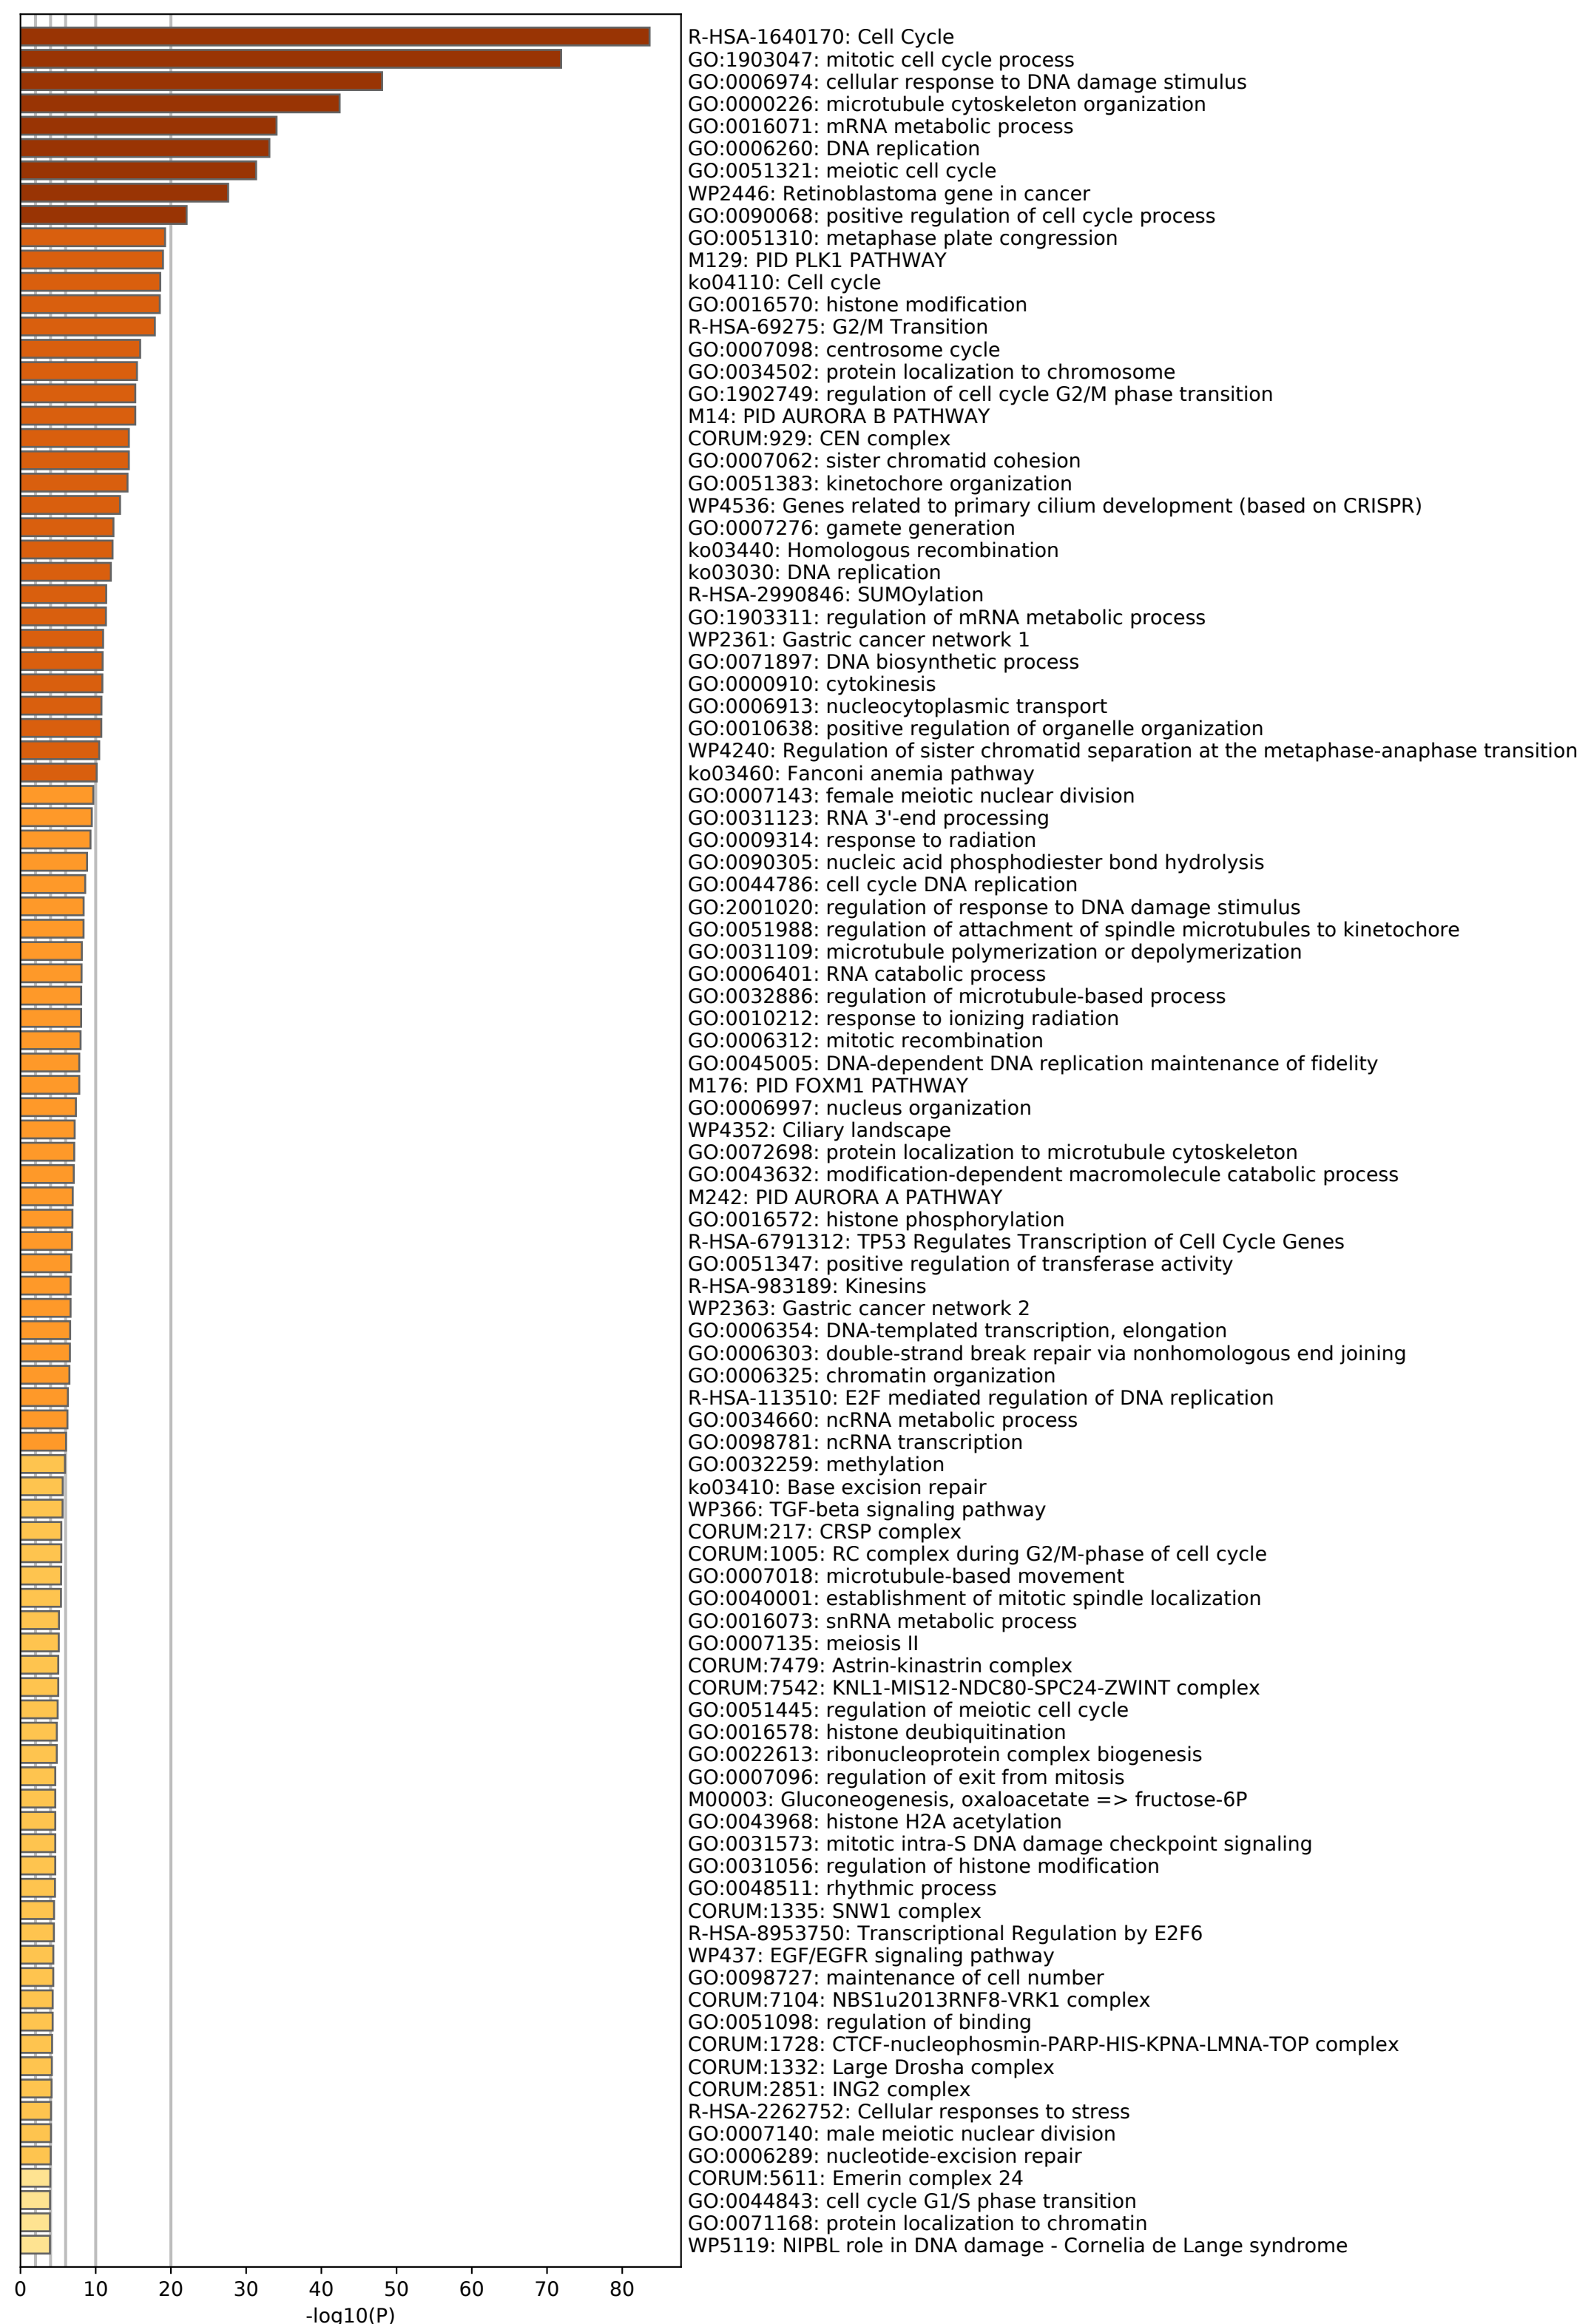

Supplement: table1-data1 [file elife-81290-table1-data1-v2.zip]

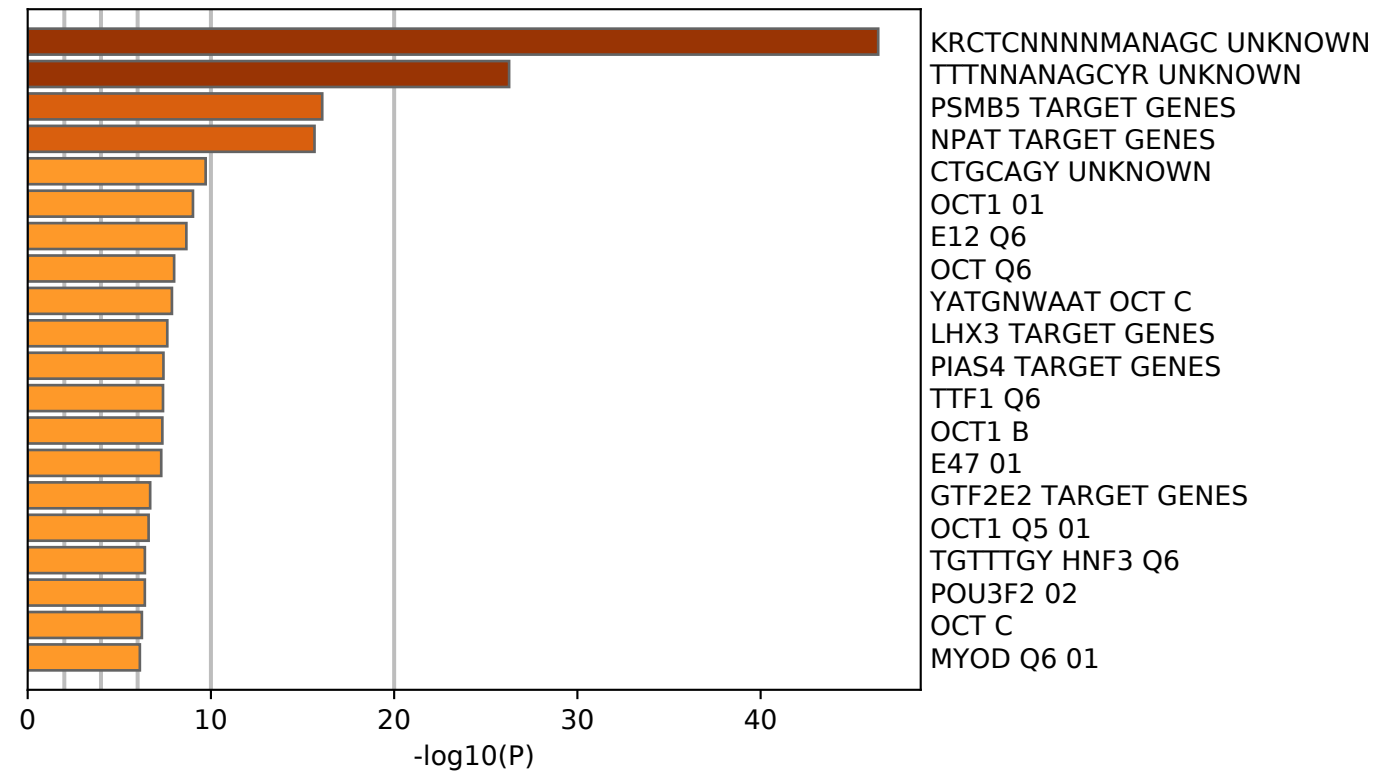

Supplement: table1-data1 [file elife-81290-table1-data1-v2.zip]

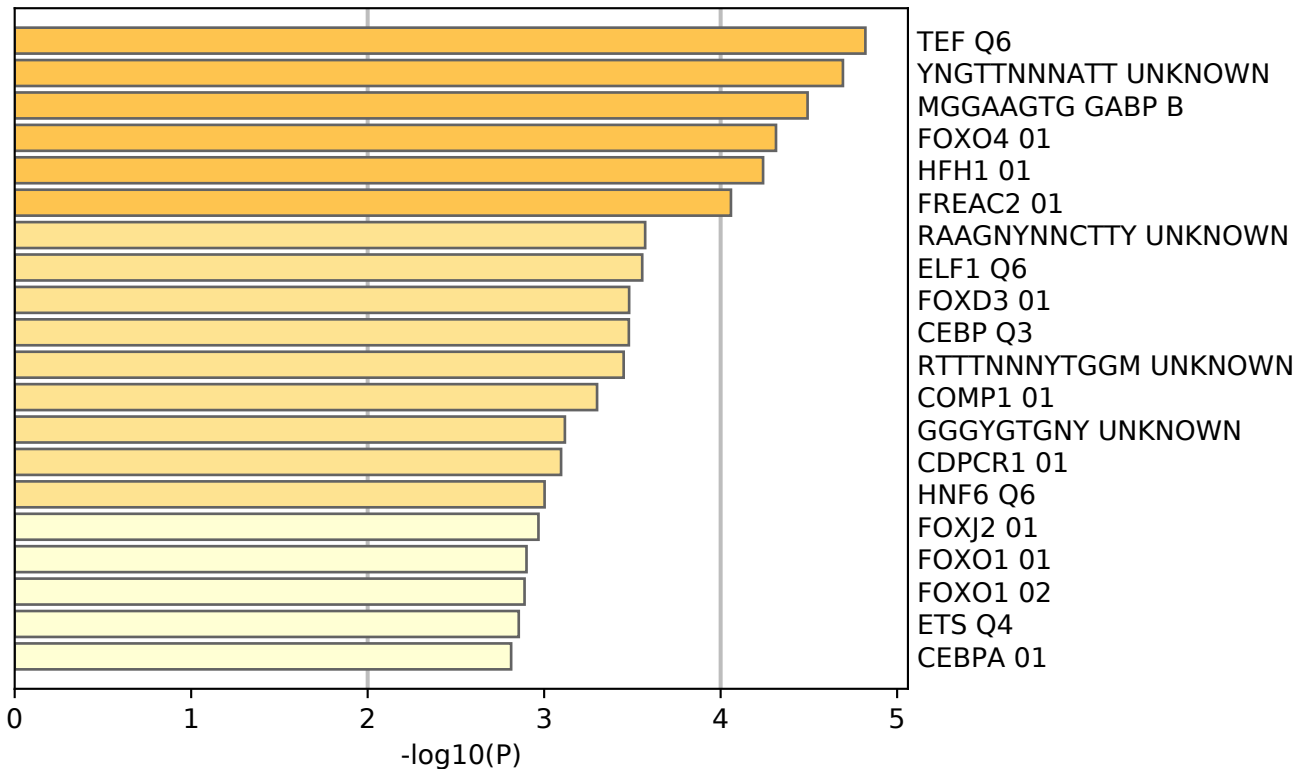

Supplement: table1-data1 [file elife-81290-table1-data1-v2.zip]

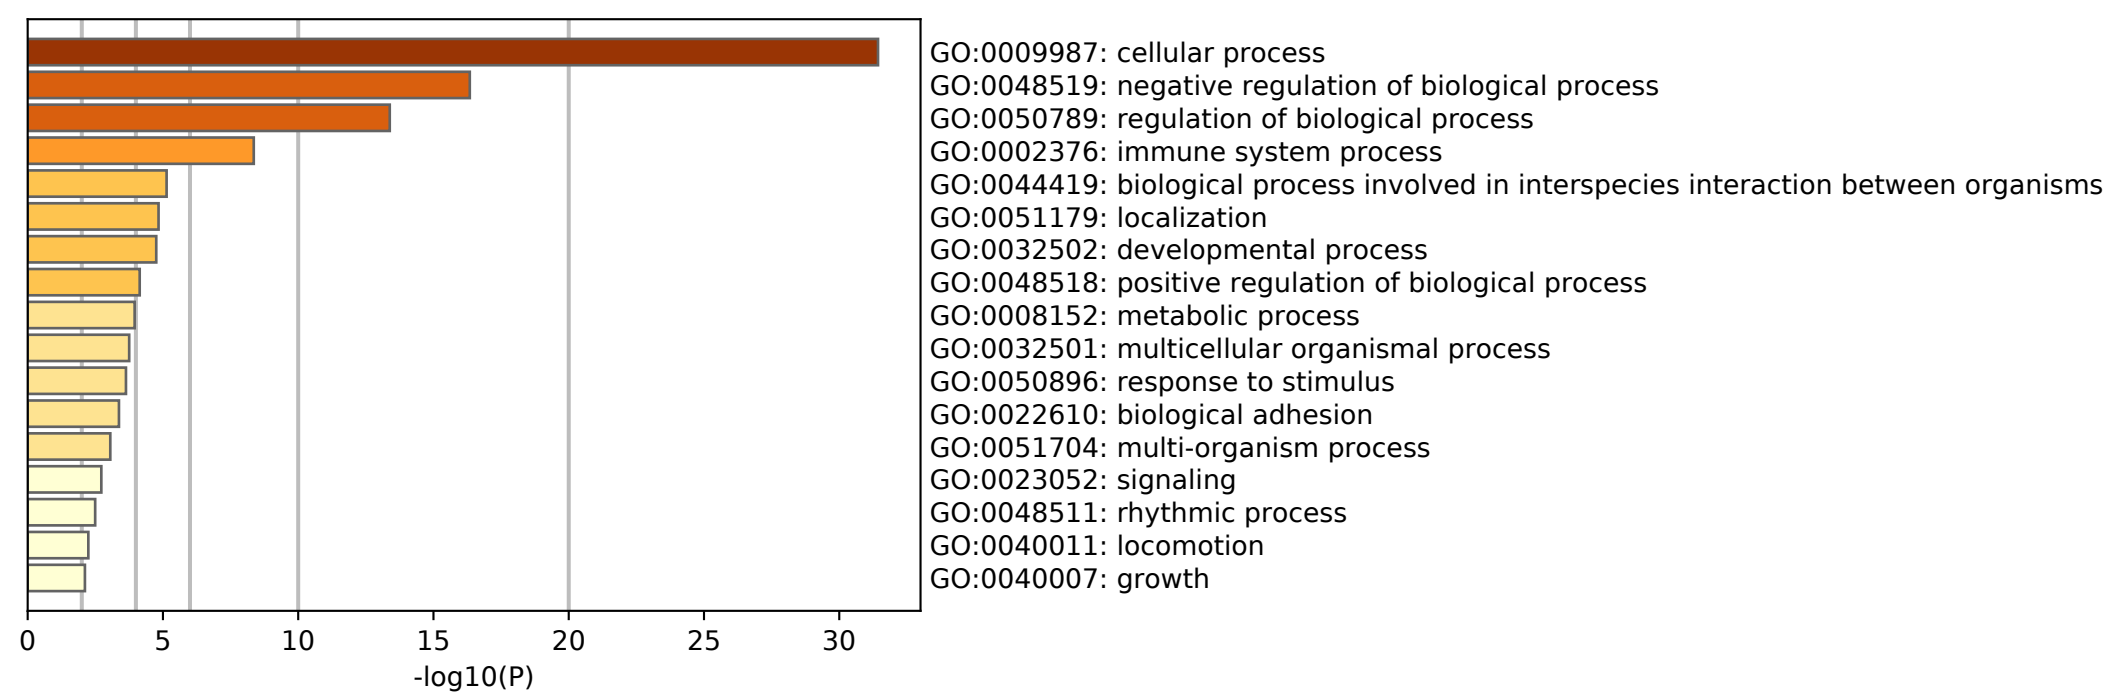

Supplement: table1-data1 [file elife-81290-table1-data1-v2.zip]

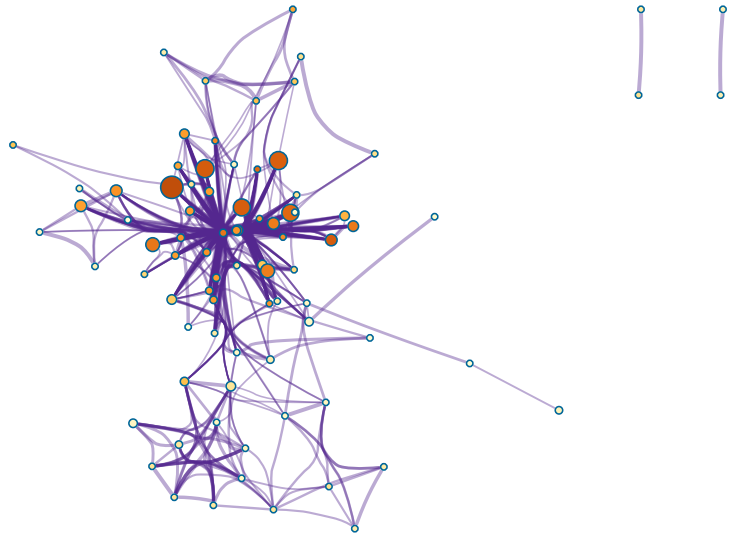

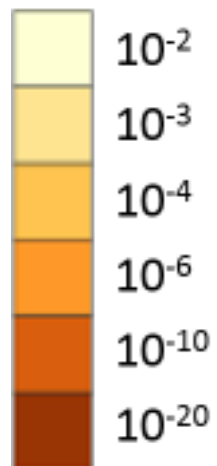

 created by  
<http://metascape.org>

Supplement: table1-data1 [file elife-81290-table1-data1-v2.zip]

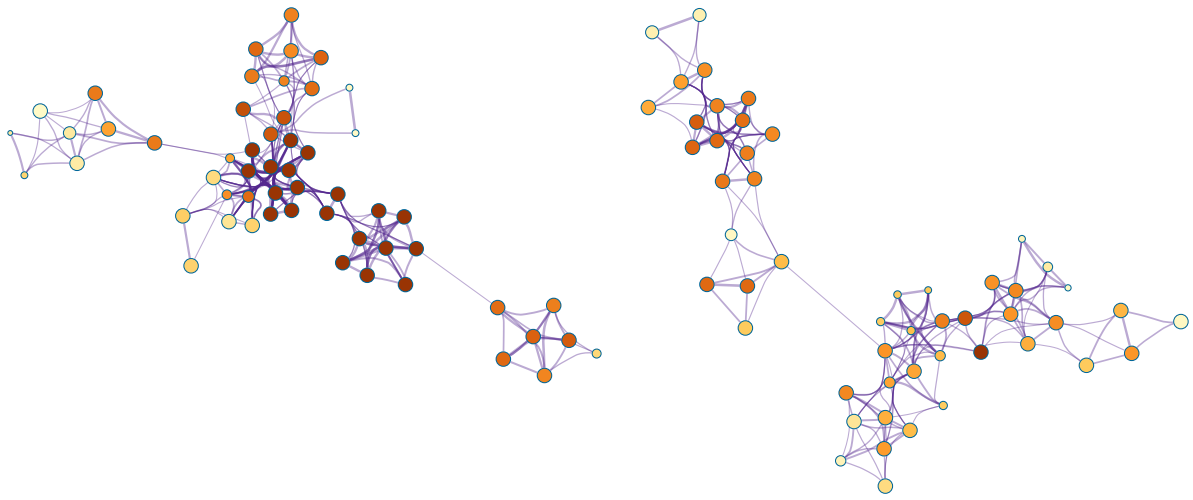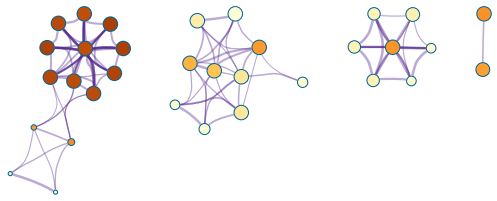



 created by  
<http://metascape.org>

Supplement: table1-data1 [file elife-81290-table1-data1-v2.zip]

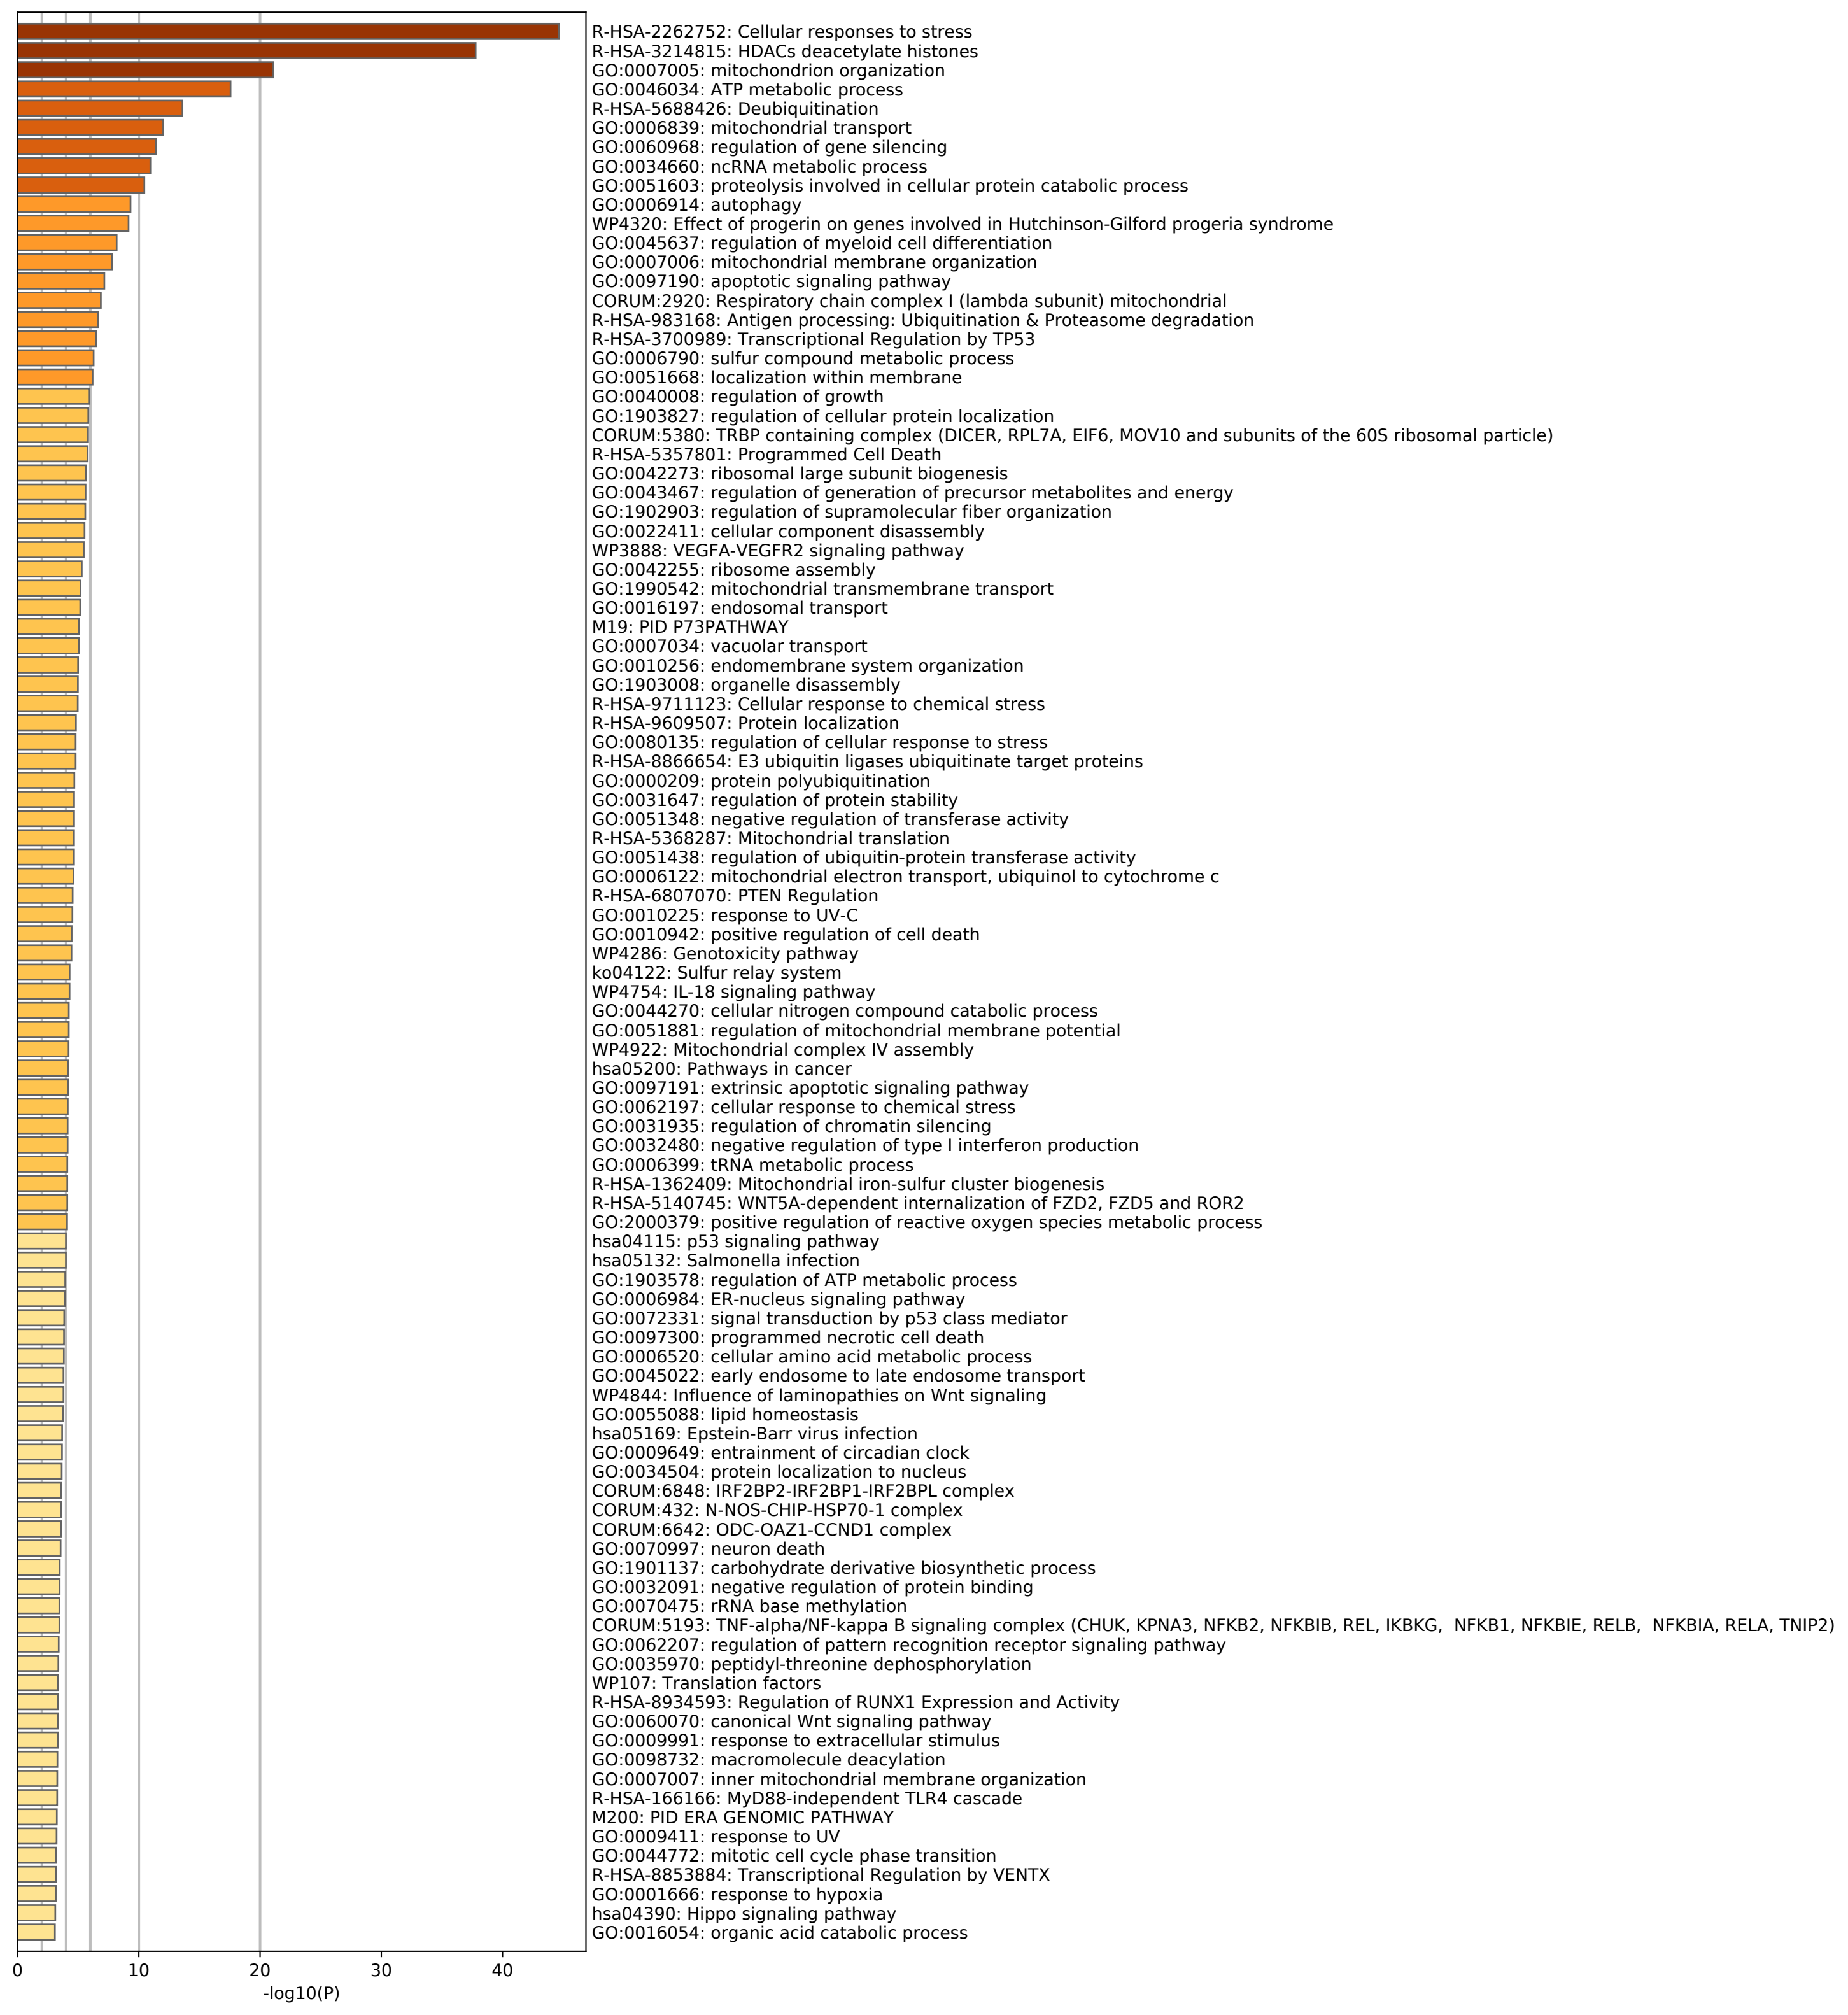

Supplement: table1-data1 [file elife-81290-table1-data1-v2.zip]

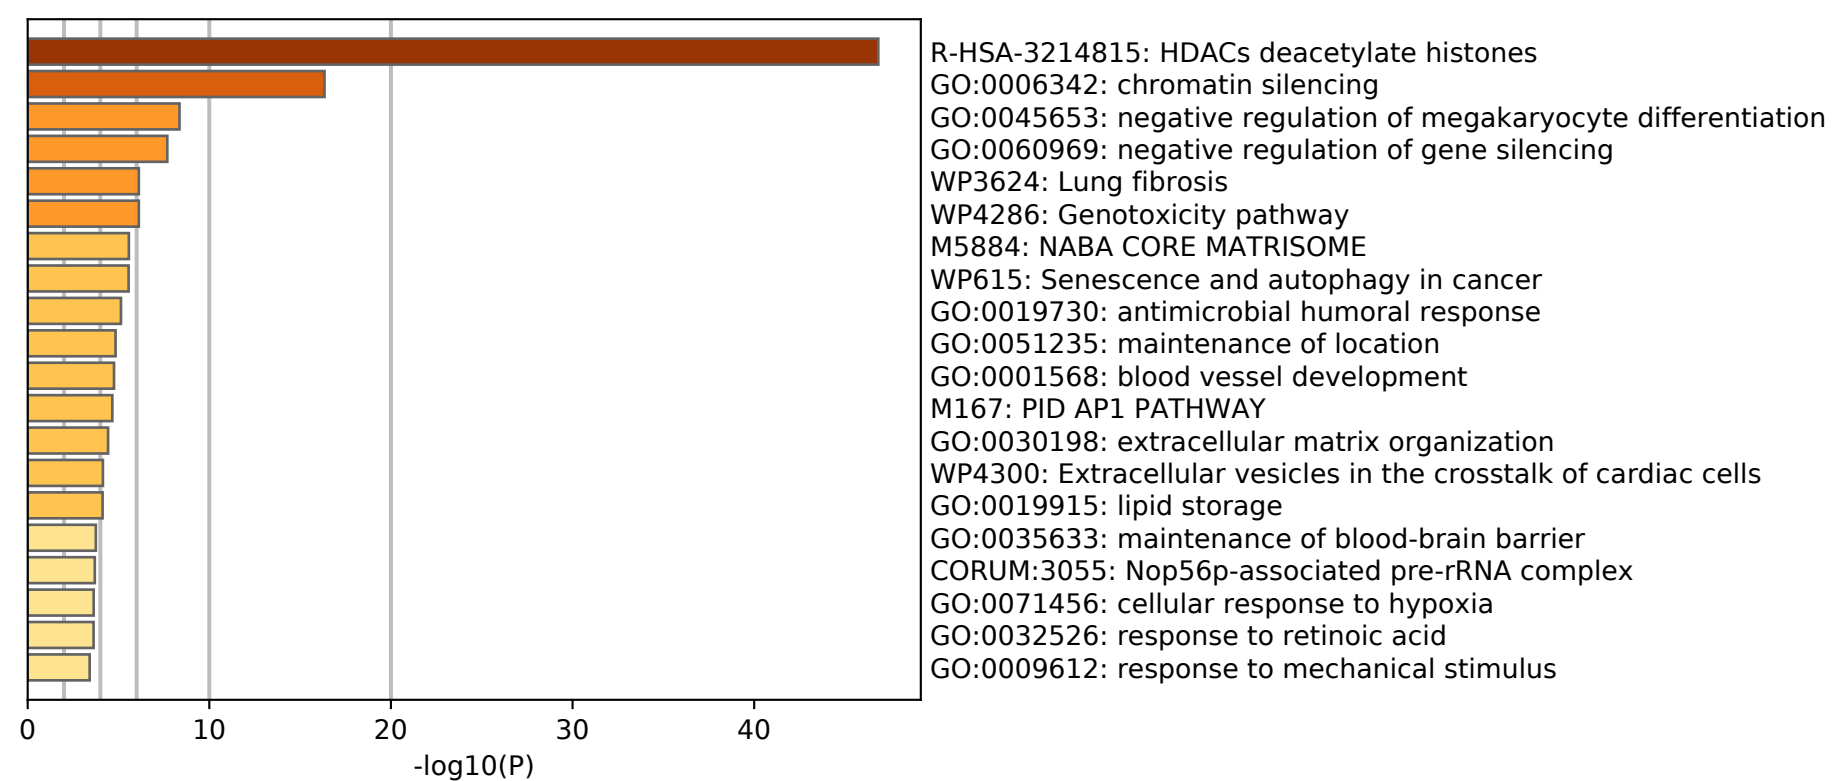

Supplement: table1-data1 [file elife-81290-table1-data1-v2.zip]

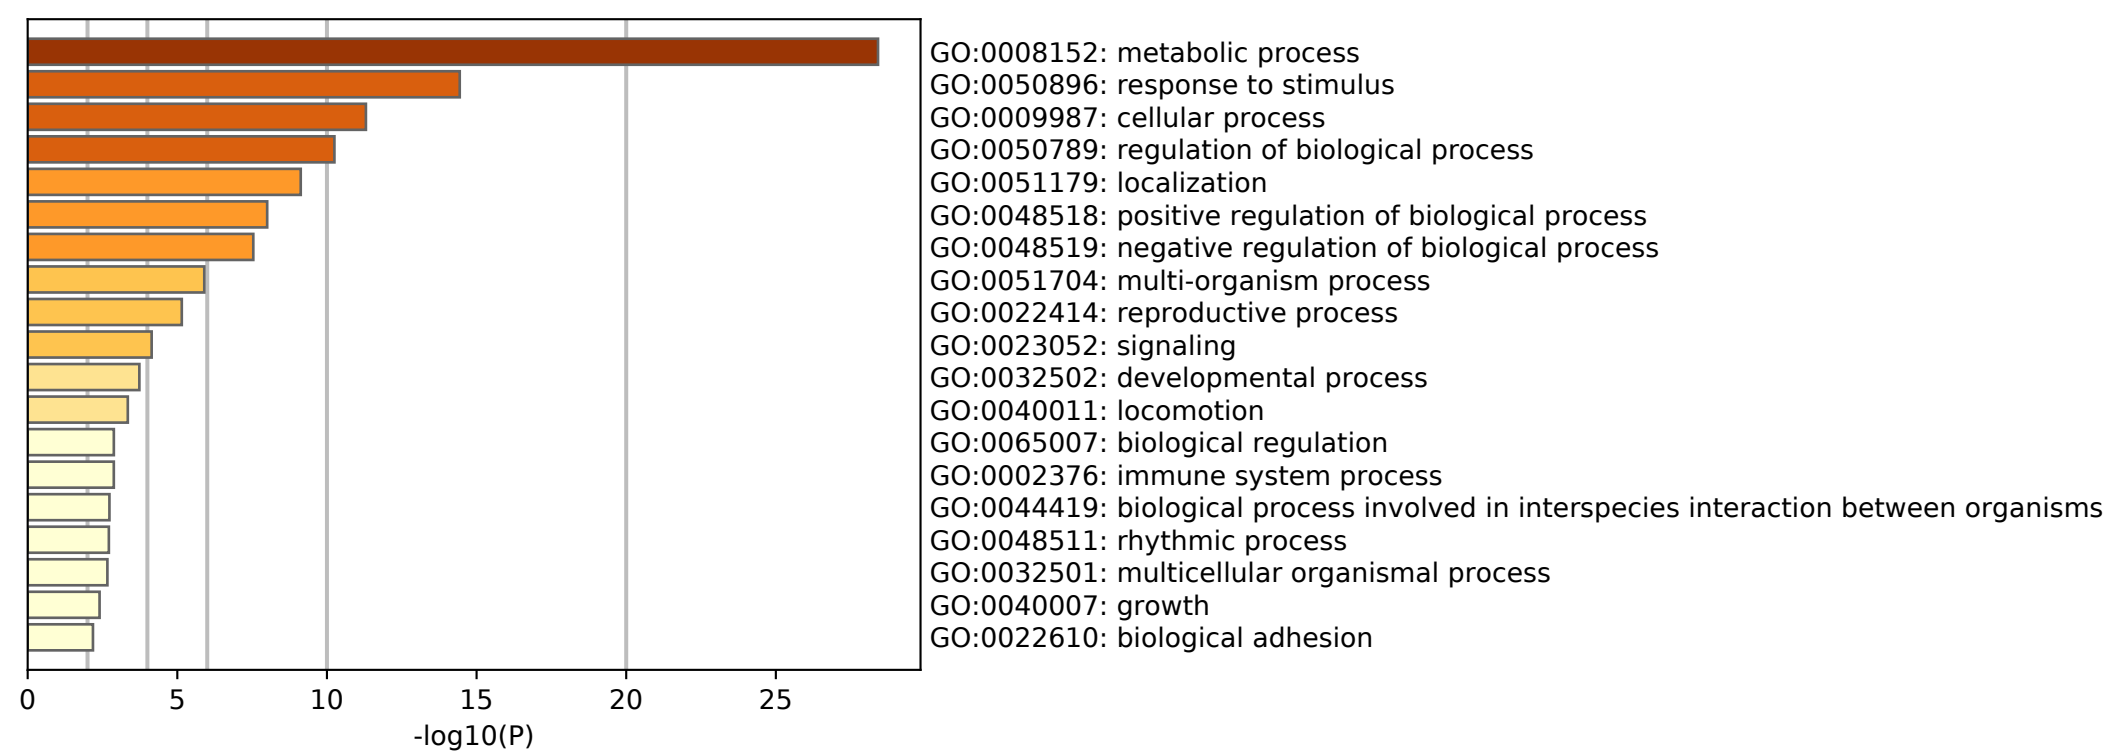

Supplement: table1-data1 [file elife-81290-table1-data1-v2.zip]

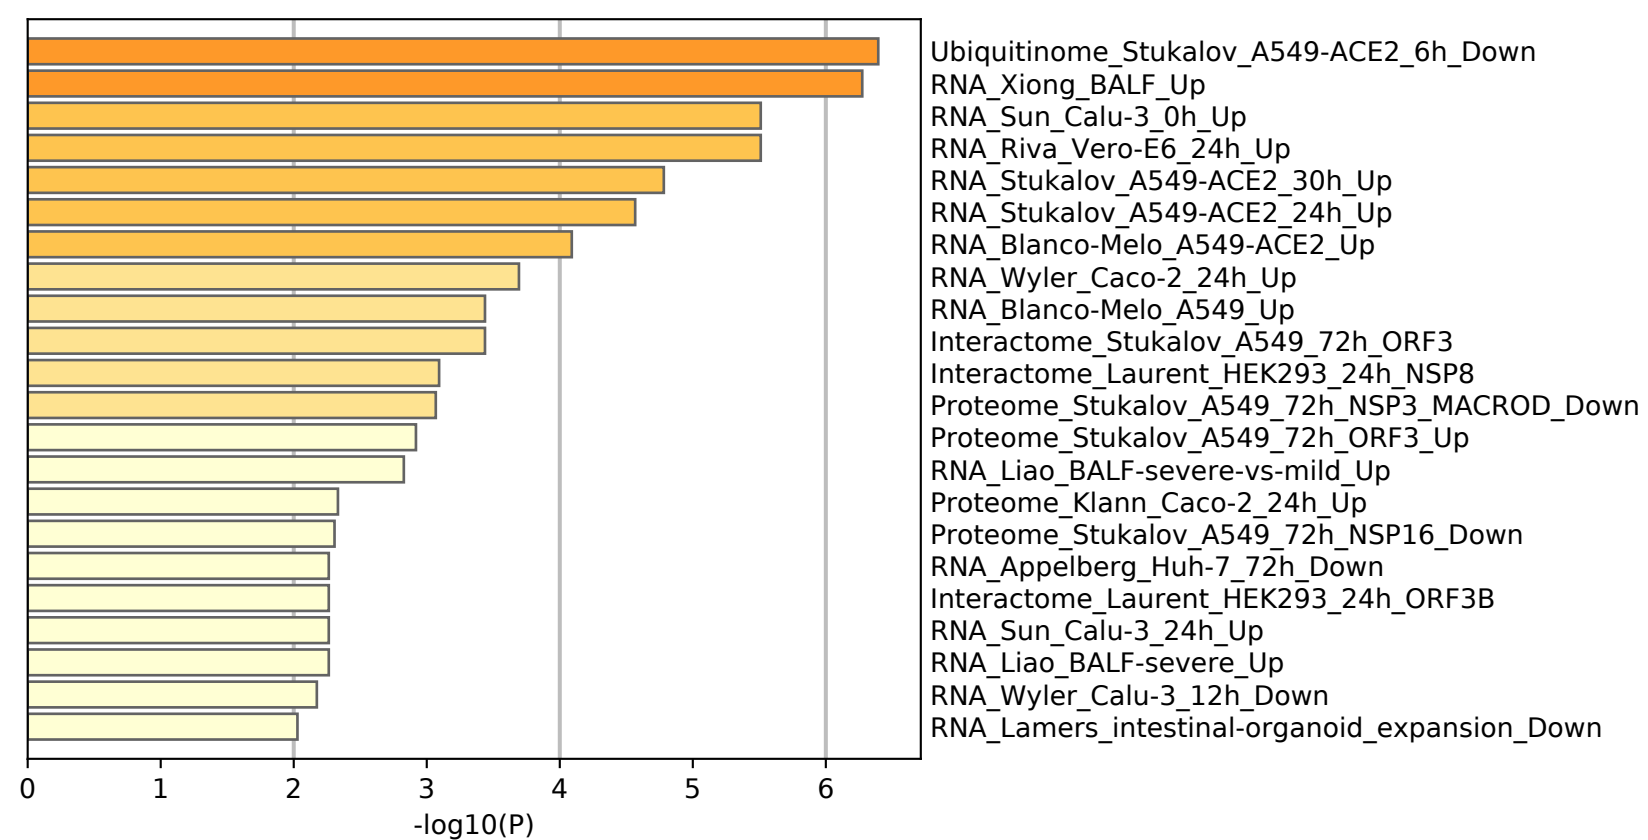

Supplement: table1-data1 [file elife-81290-table1-data1-v2.zip]

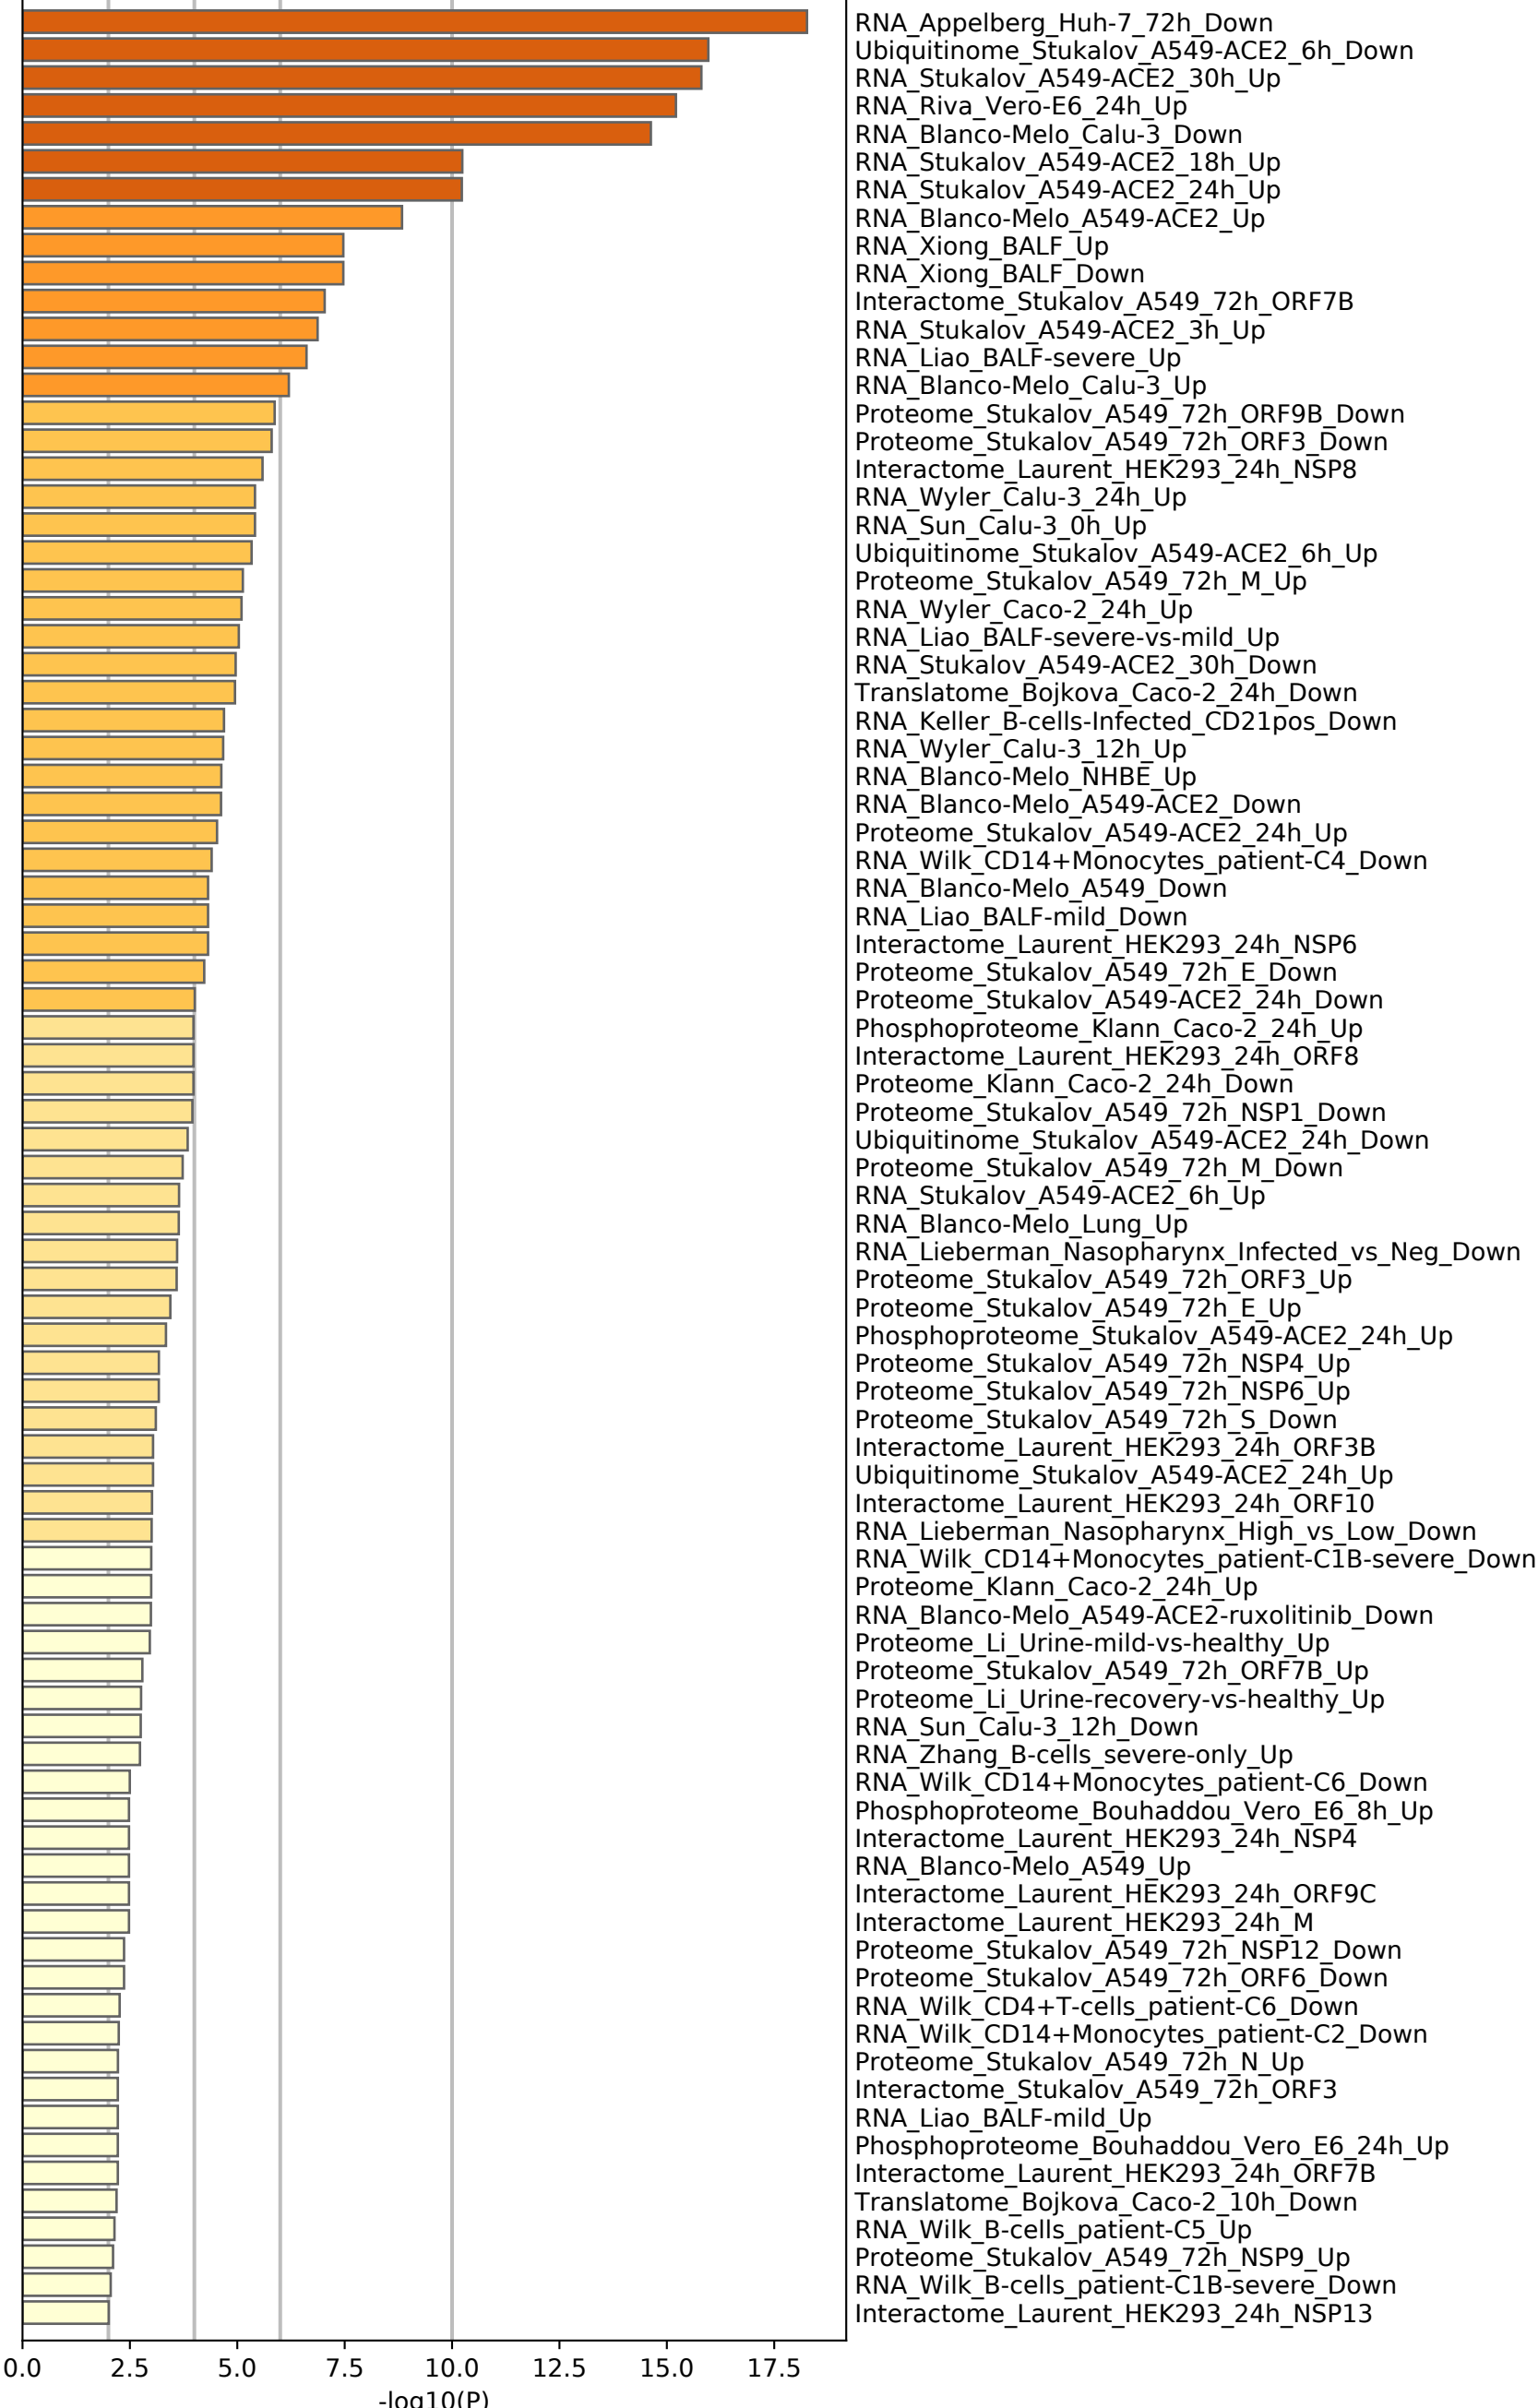

Supplement: table1-data1 [file elife-81290-table1-data1-v2.zip]

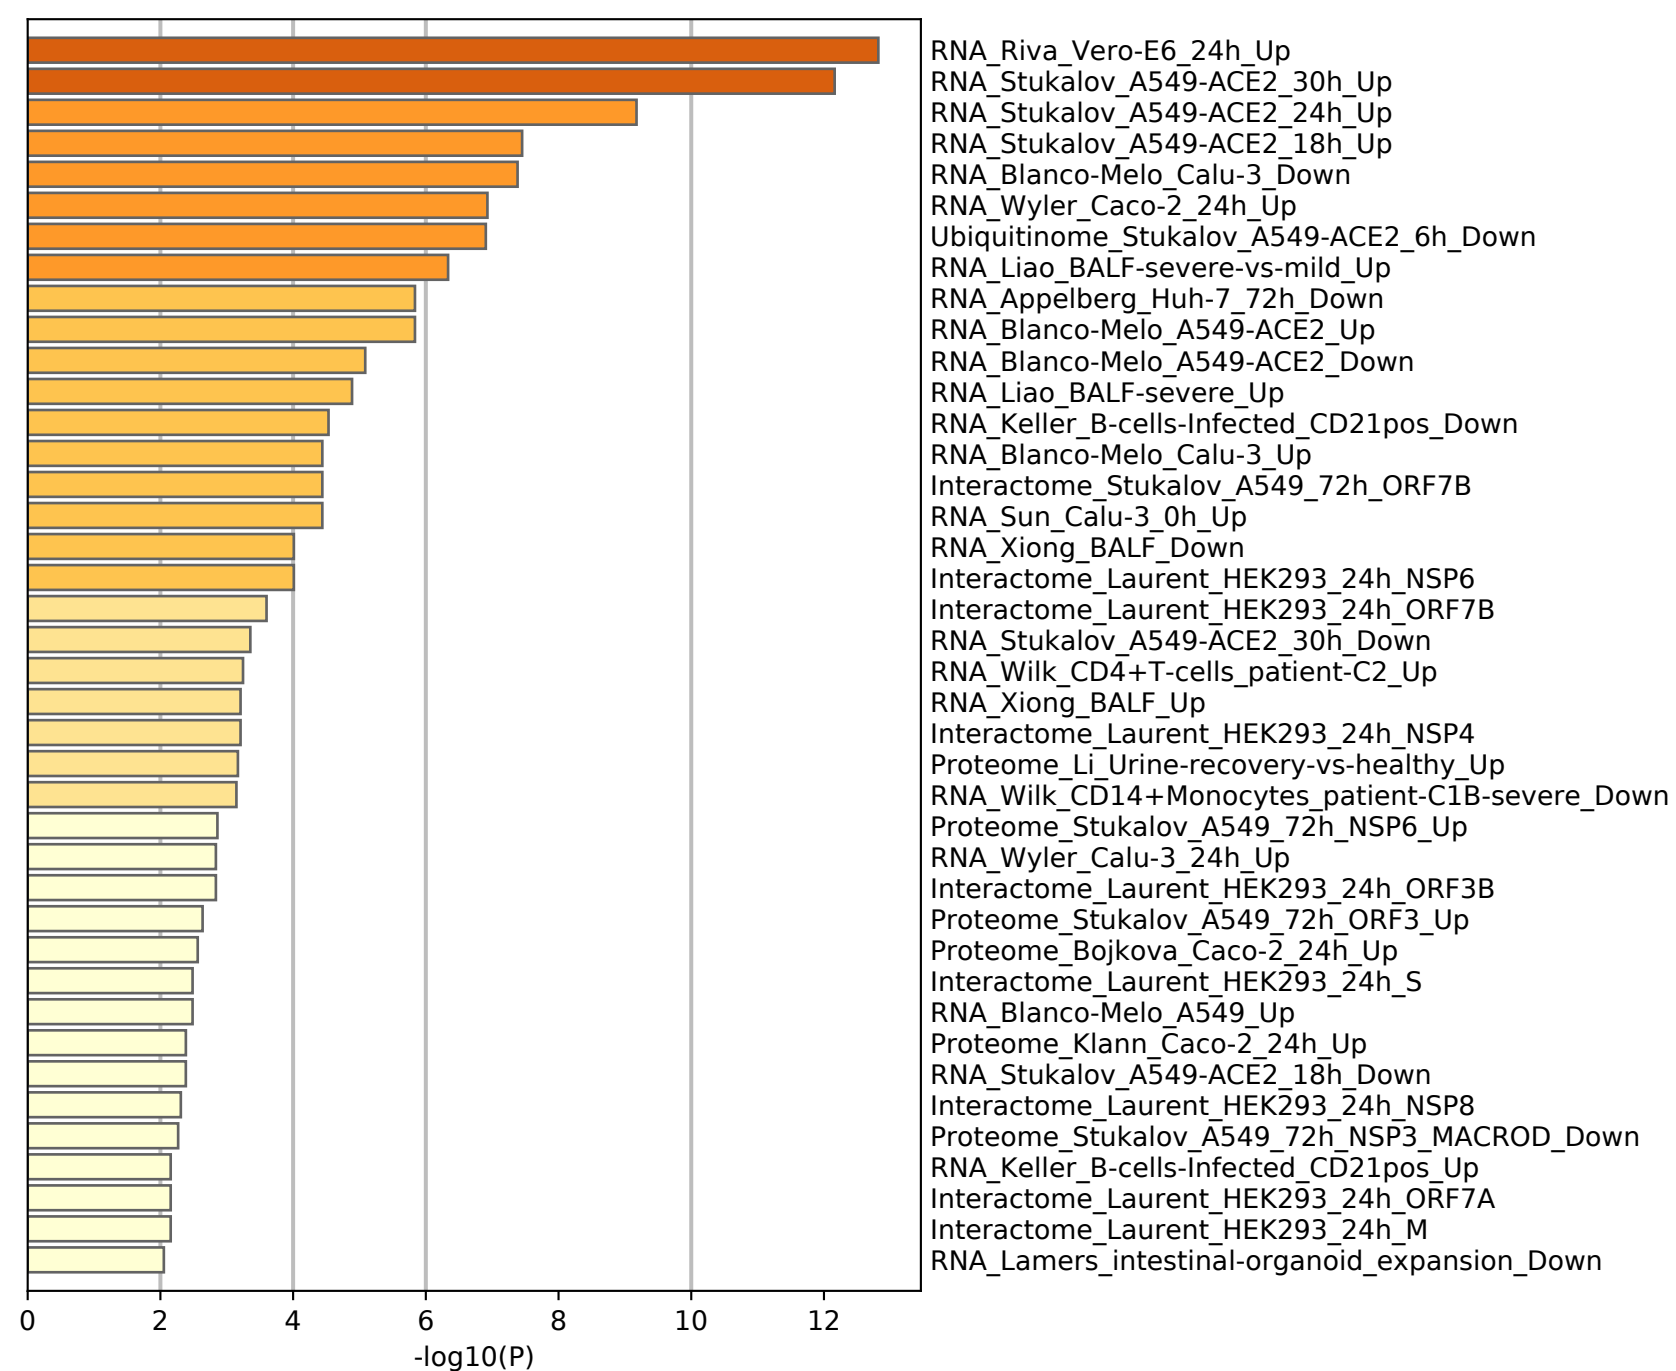

Supplement: table1-data1 [file elife-81290-table1-data1-v2.zip]

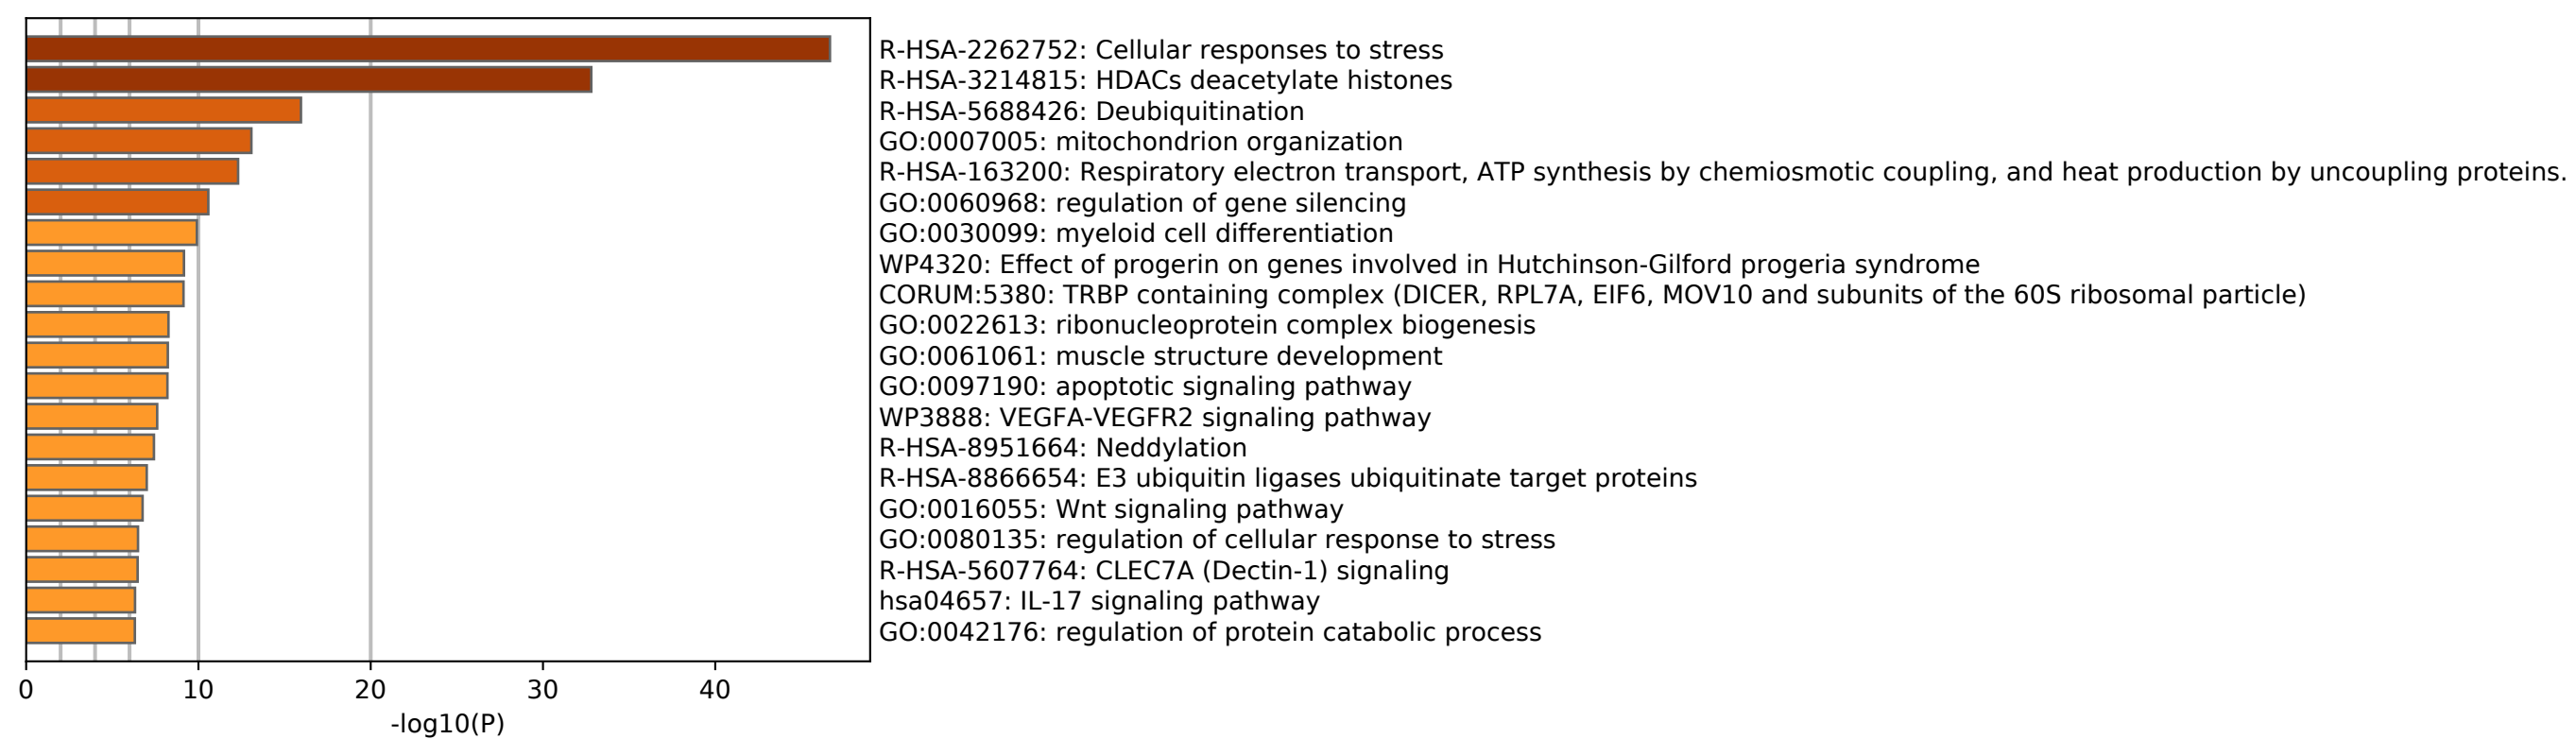

Supplement: table1-data1 [file elife-81290-table1-data1-v2.zip]

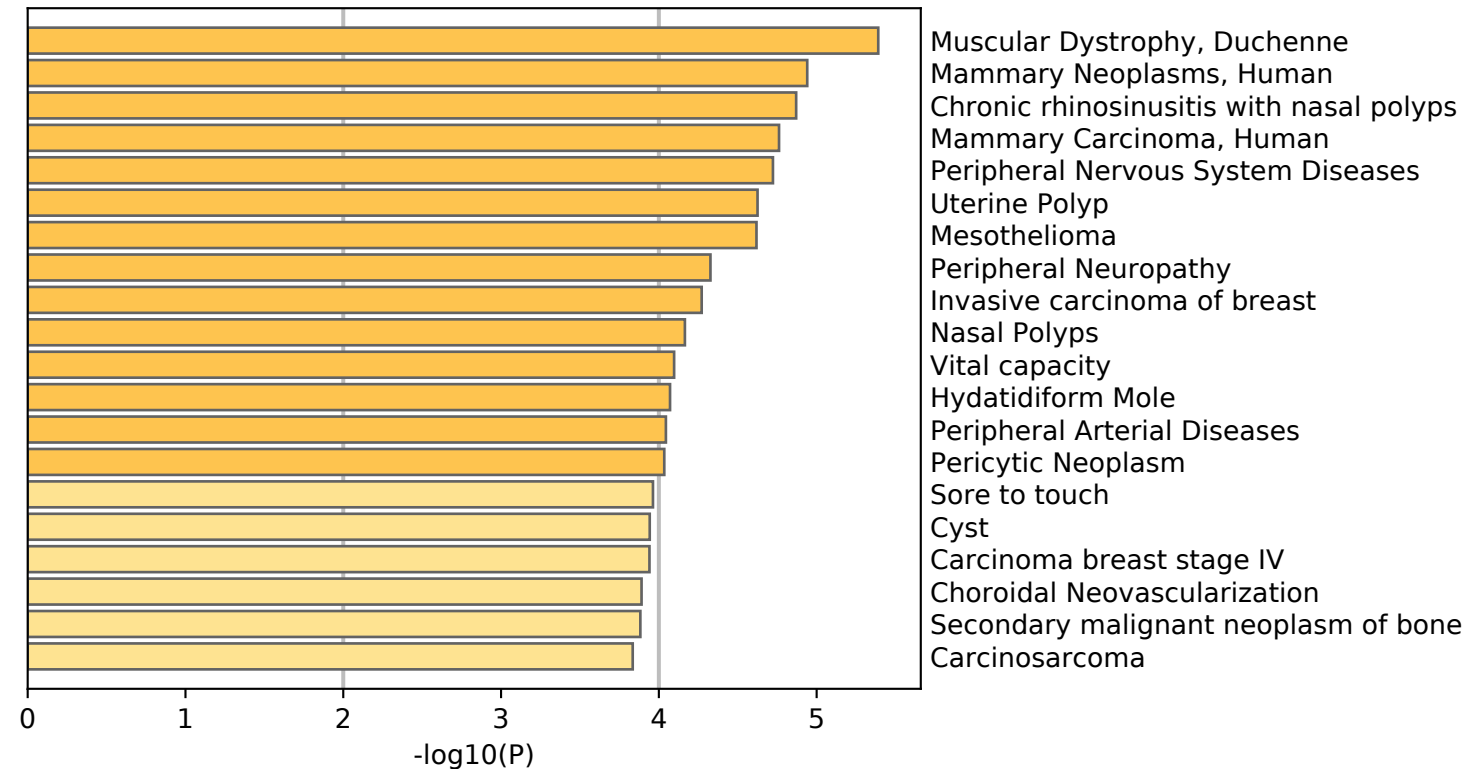

Supplement: table1-data1 [file elife-81290-table1-data1-v2.zip]

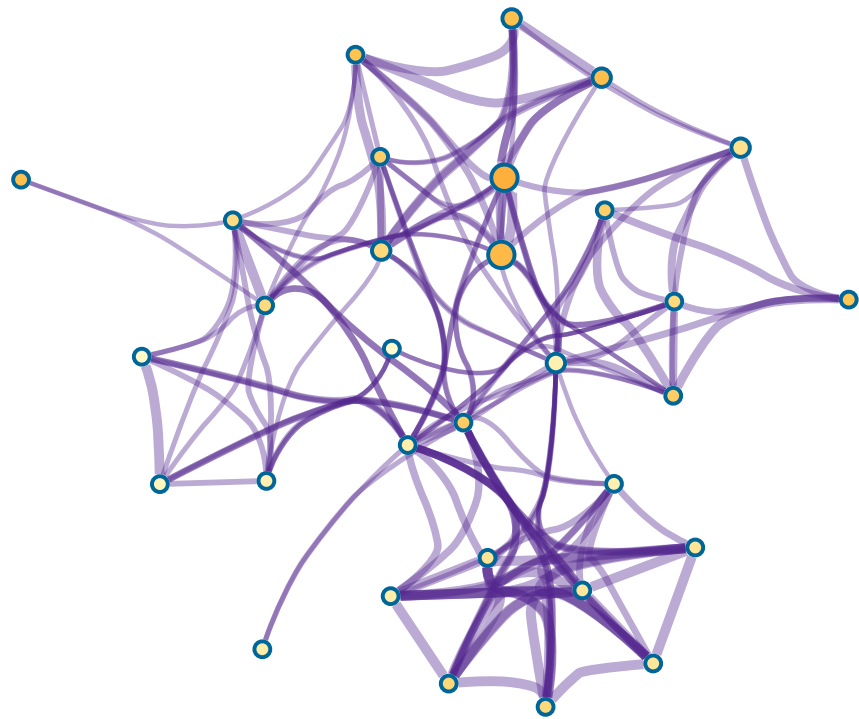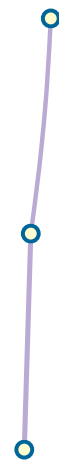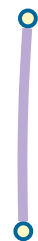



 created by  
<http://metascape.org>

Supplement: table1-data1 [file elife-81290-table1-data1-v2.zip]

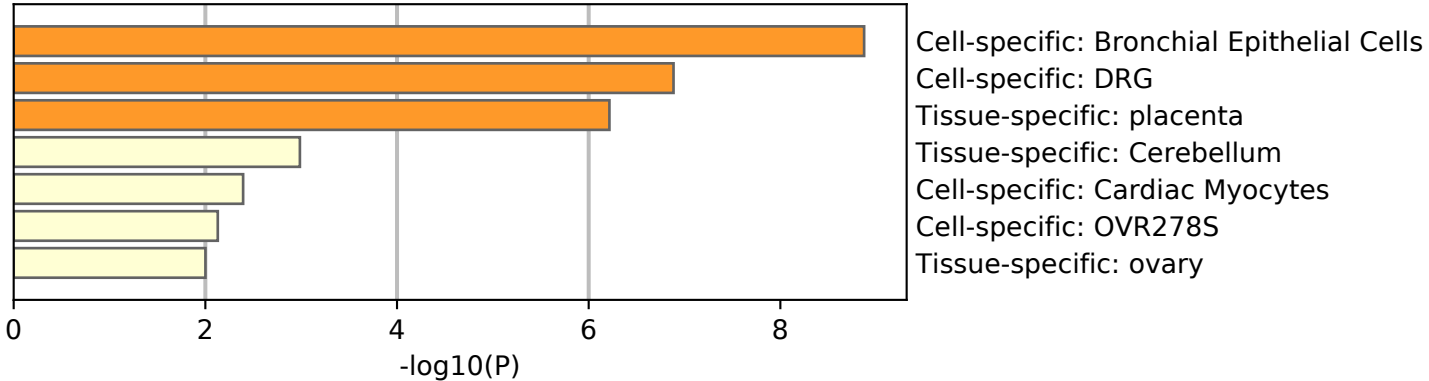

Supplement: table1-data1 [file elife-81290-table1-data1-v2.zip]

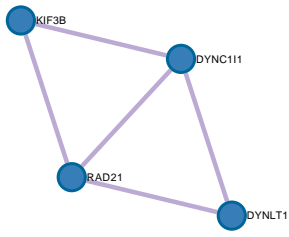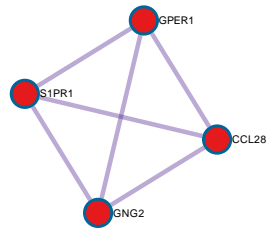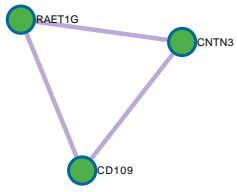

■ MCODE1  
■ MCODE2  
■ MCODE3

 created by  
<http://metascape.org>

Supplement: table1-data1 [file elife-81290-table1-data1-v2.zip]

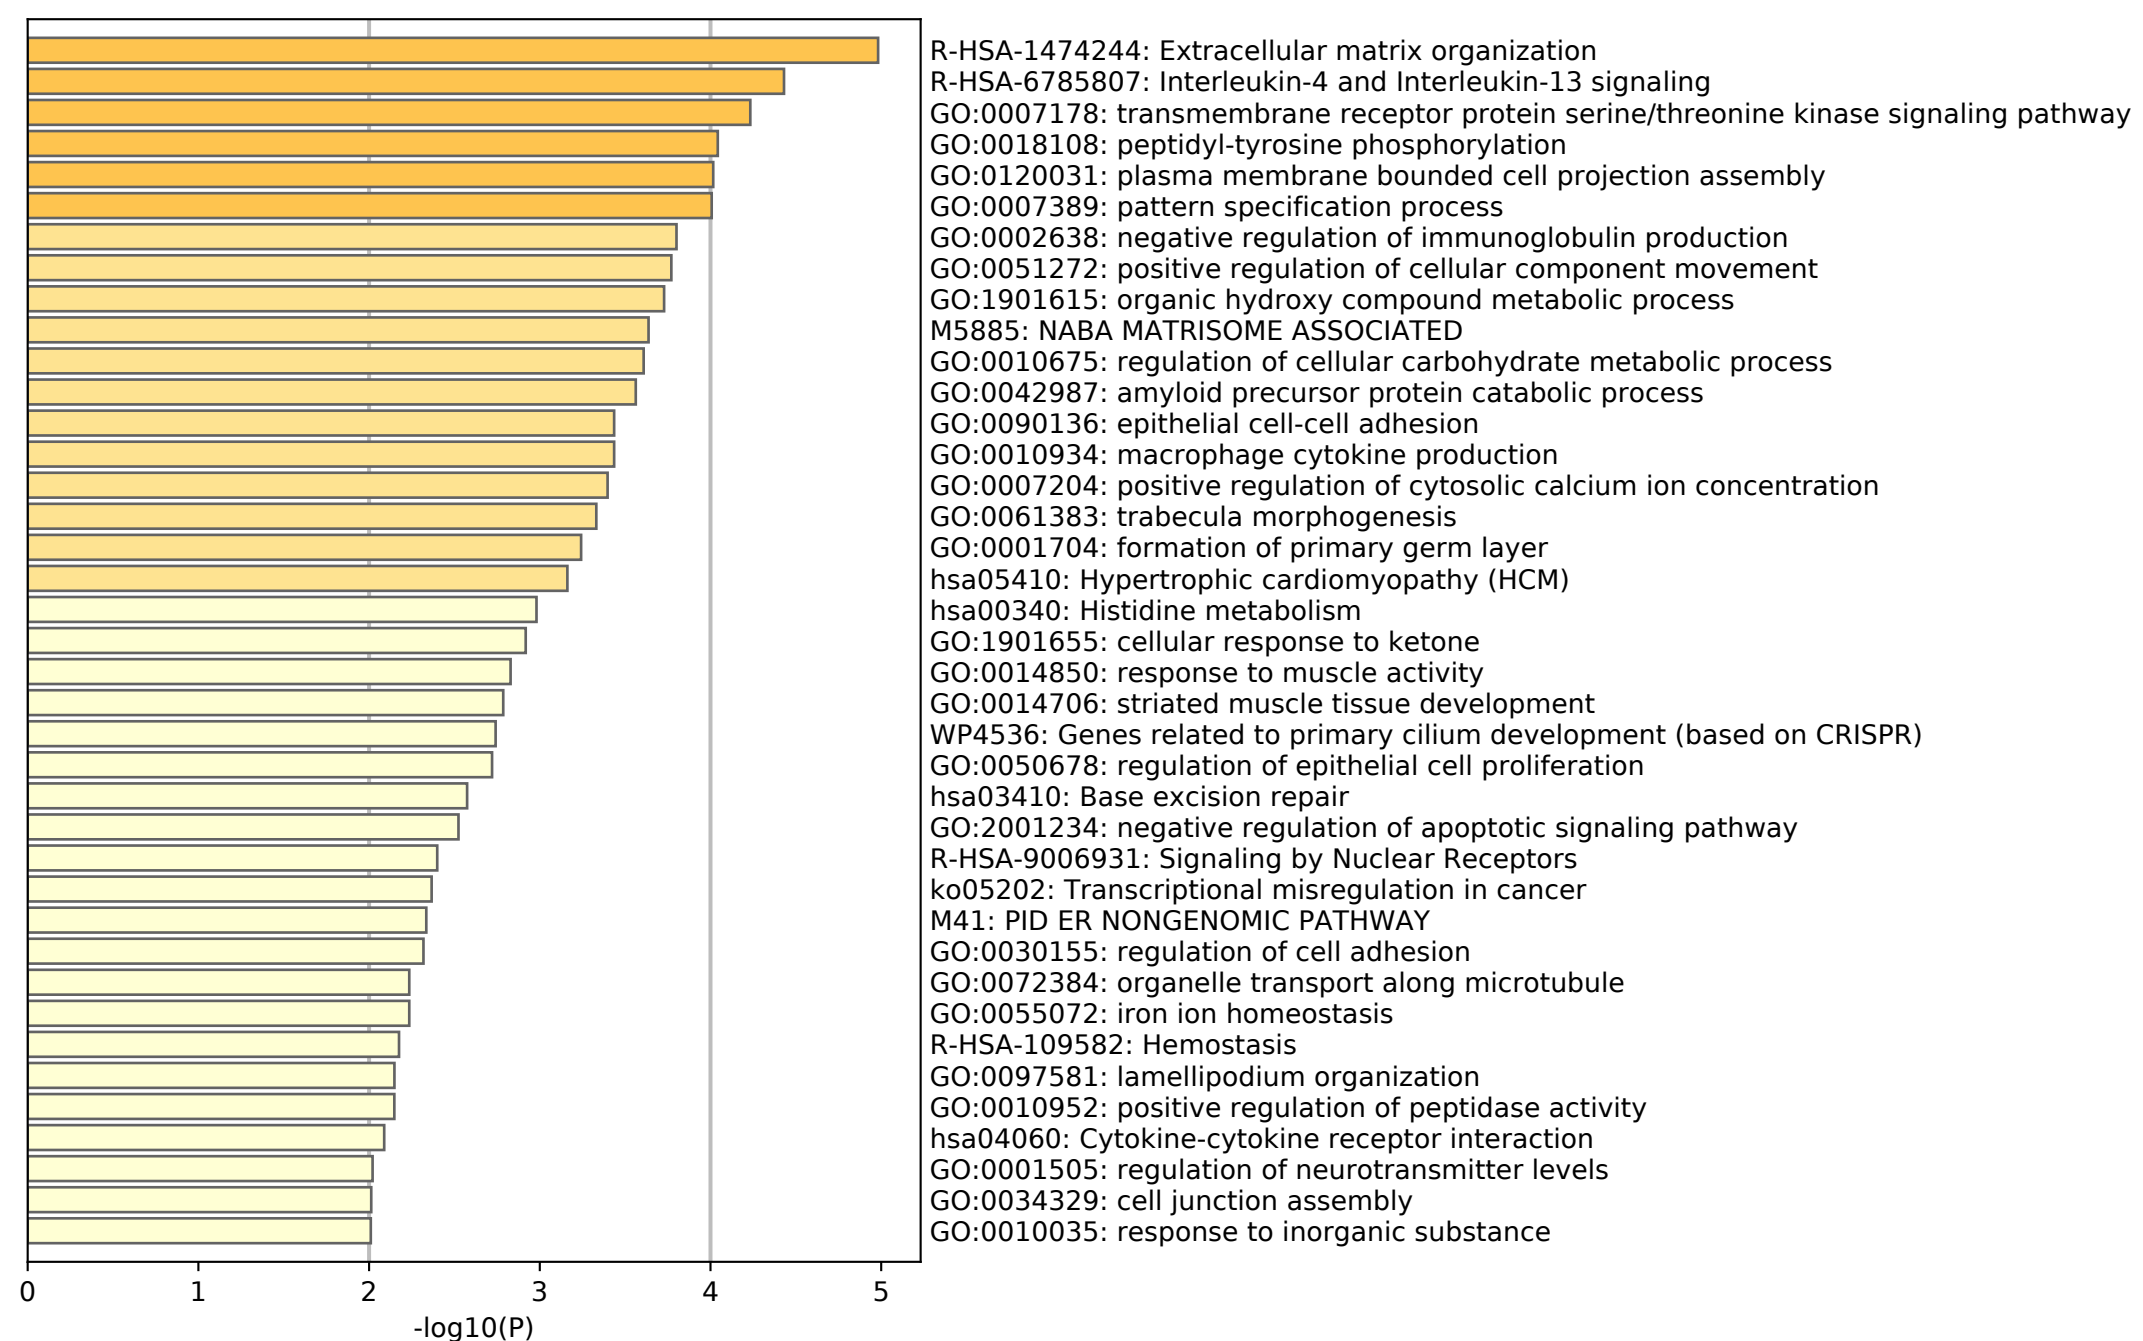

Supplement: table1-data1 [file elife-81290-table1-data1-v2.zip]

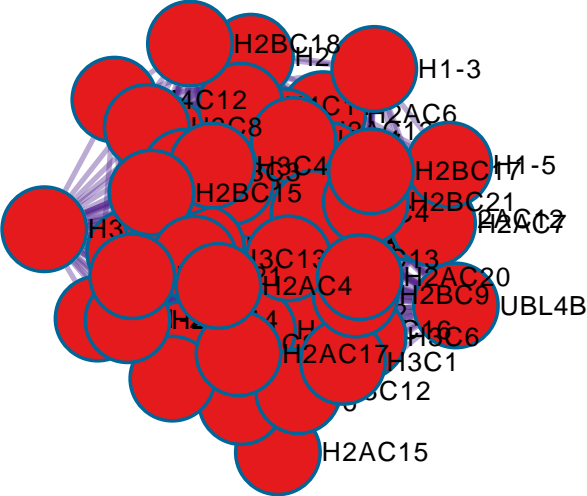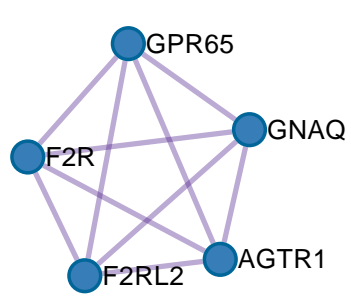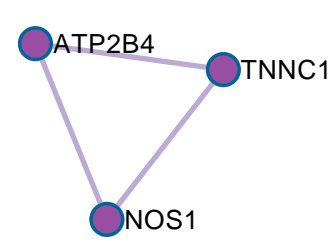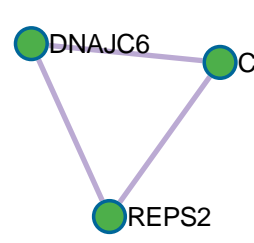

■ MCODE1  
■ MCODE2  
■ MCODE3  
■ MCODE4

 created by  
<http://metascape.org>

Supplement: table1-data1 [file elife-81290-table1-data1-v2.zip]

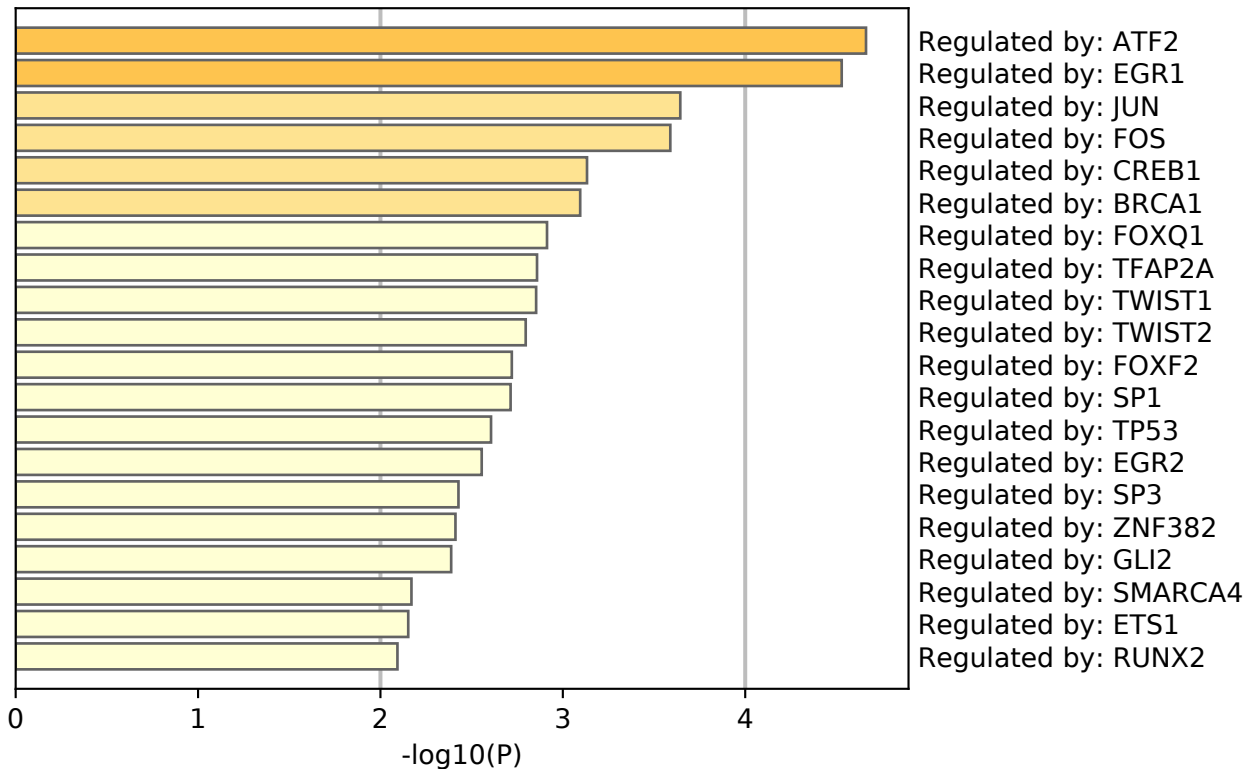

Supplement: table1-data1 [file elife-81290-table1-data1-v2.zip]

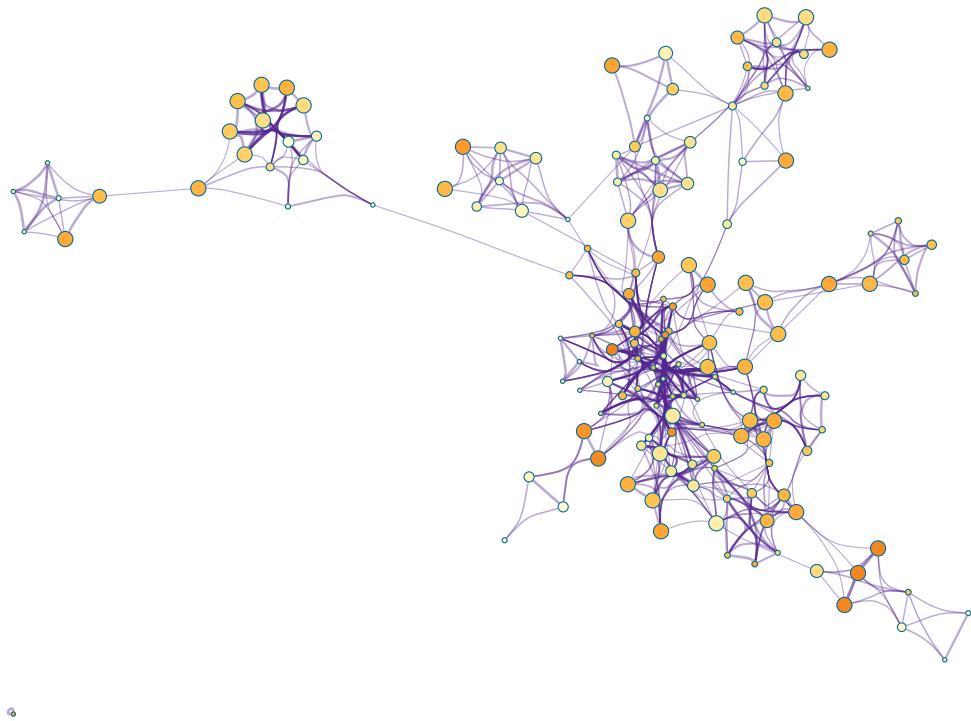



 created by  
<http://metascape.org>

Supplement: table1-data1 [file elife-81290-table1-data1-v2.zip]

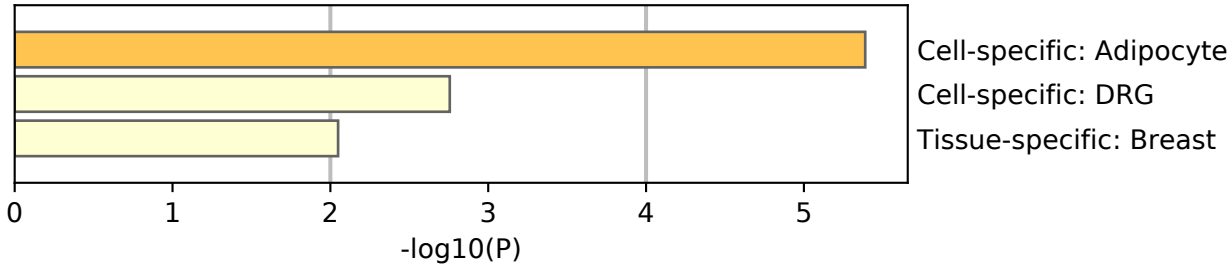

Supplement: table1-data1 [file elife-81290-table1-data1-v2.zip]

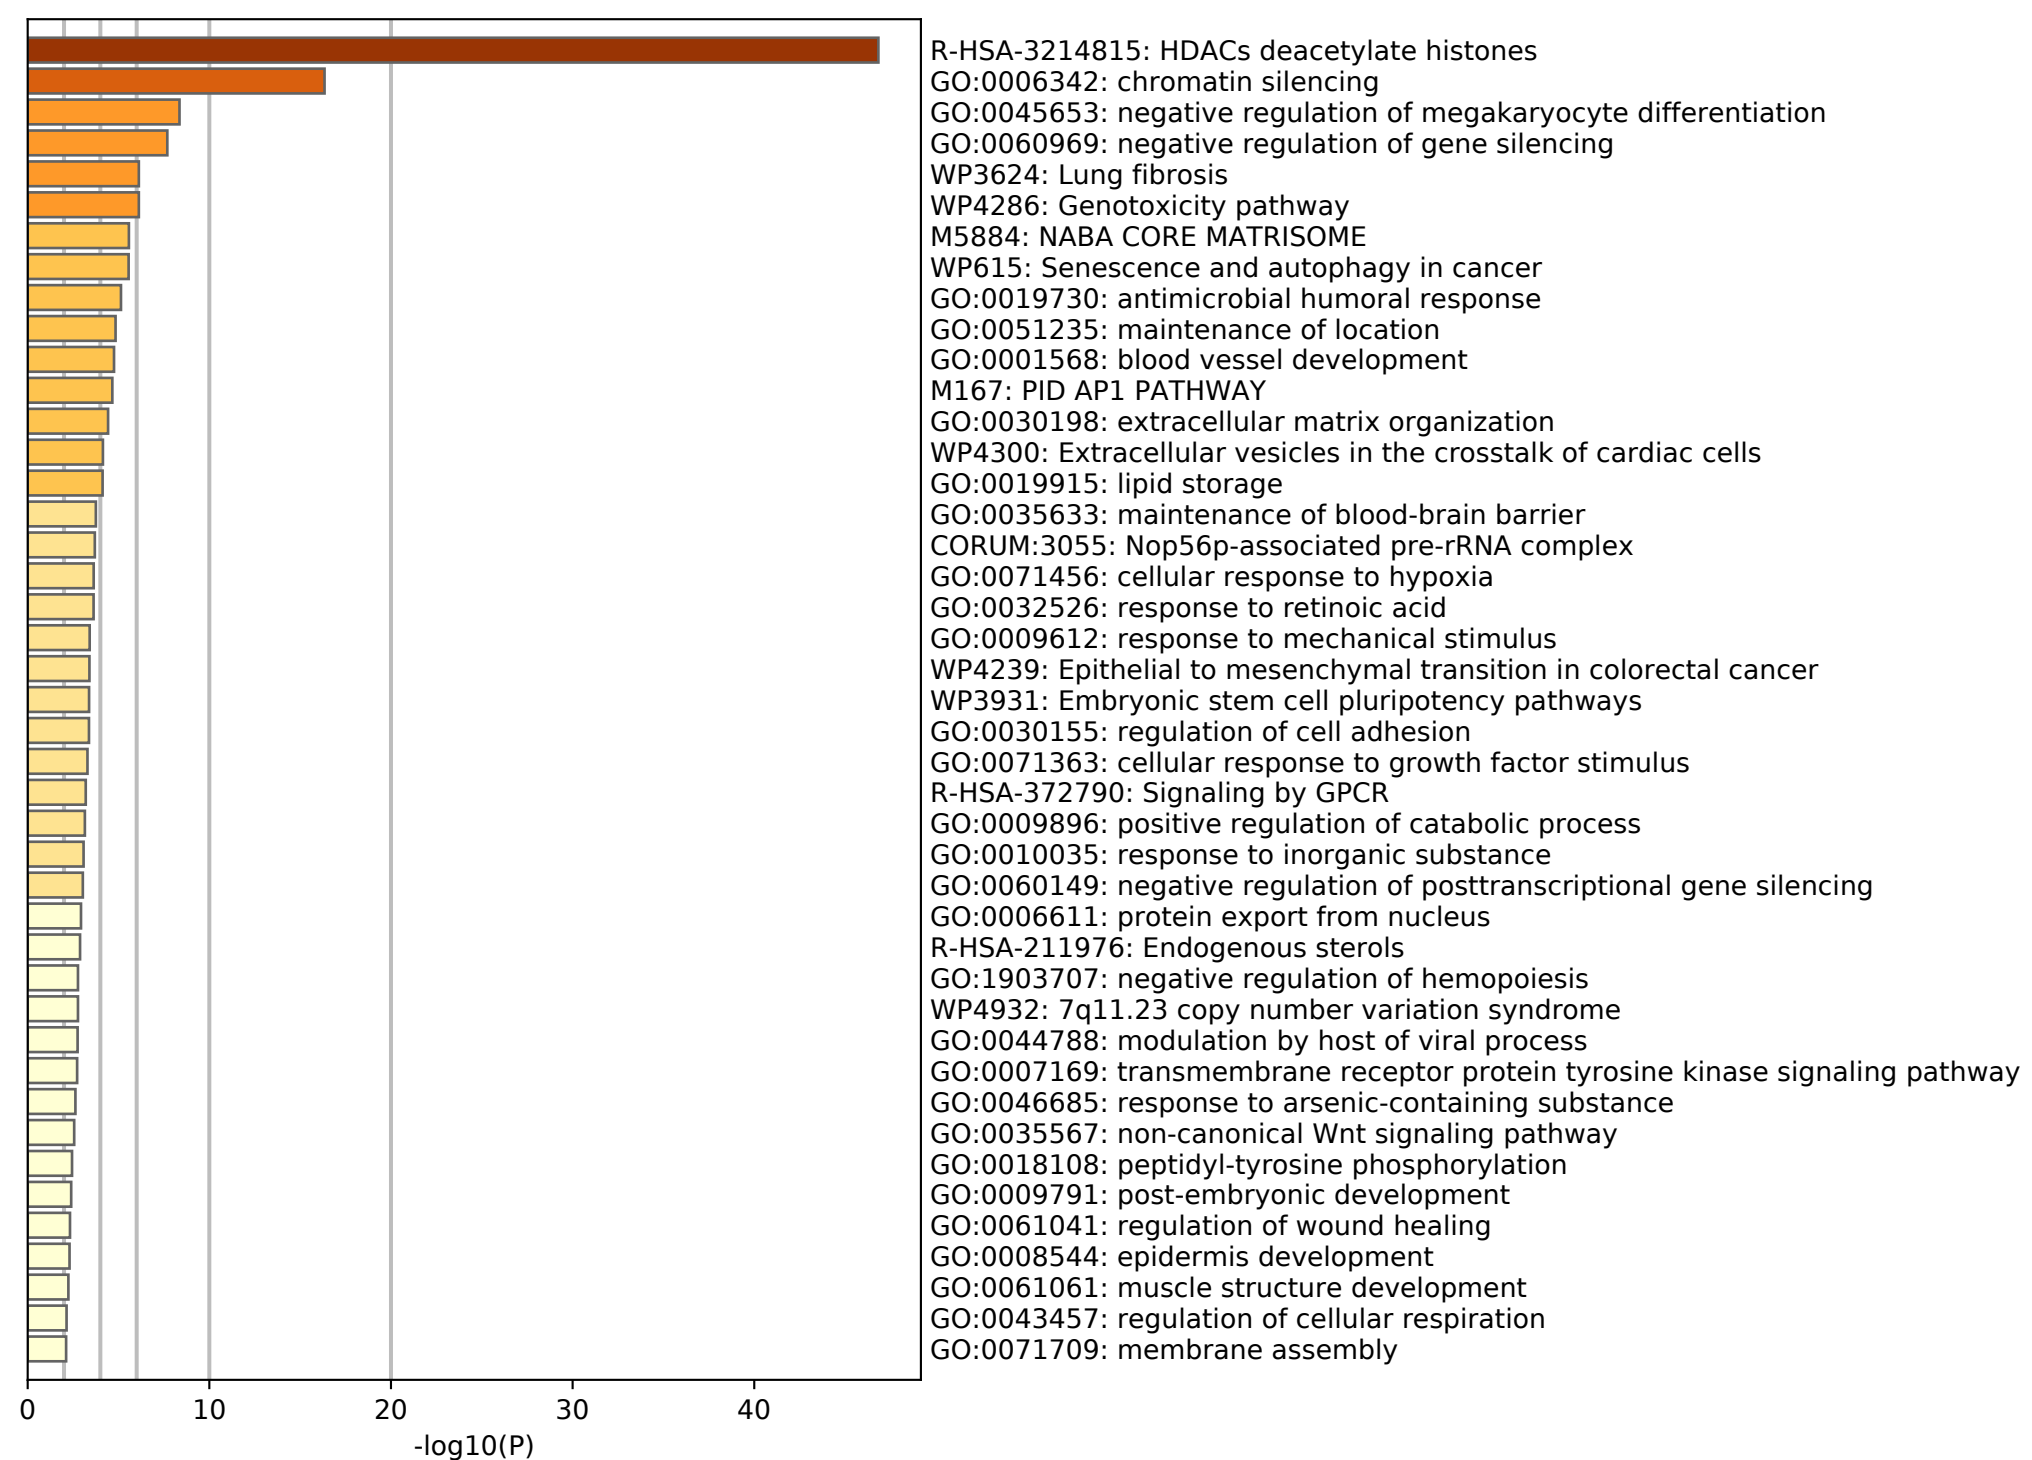

Supplement: table1-data1 [file elife-81290-table1-data1-v2.zip]

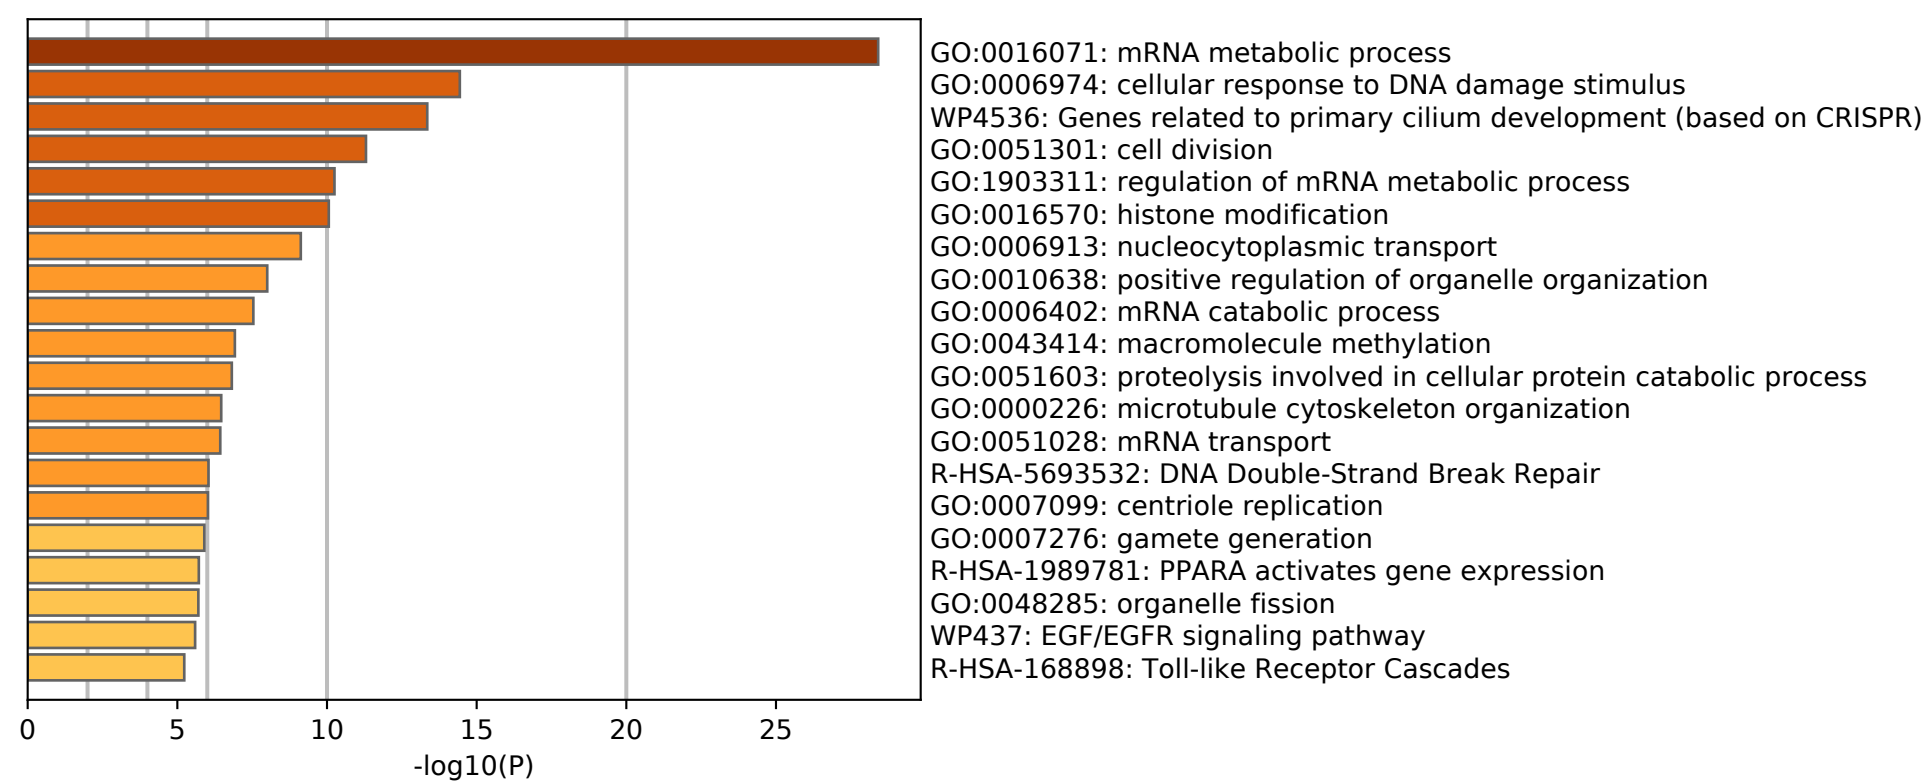

Supplement: table1-data1 [file elife-81290-table1-data1-v2.zip]

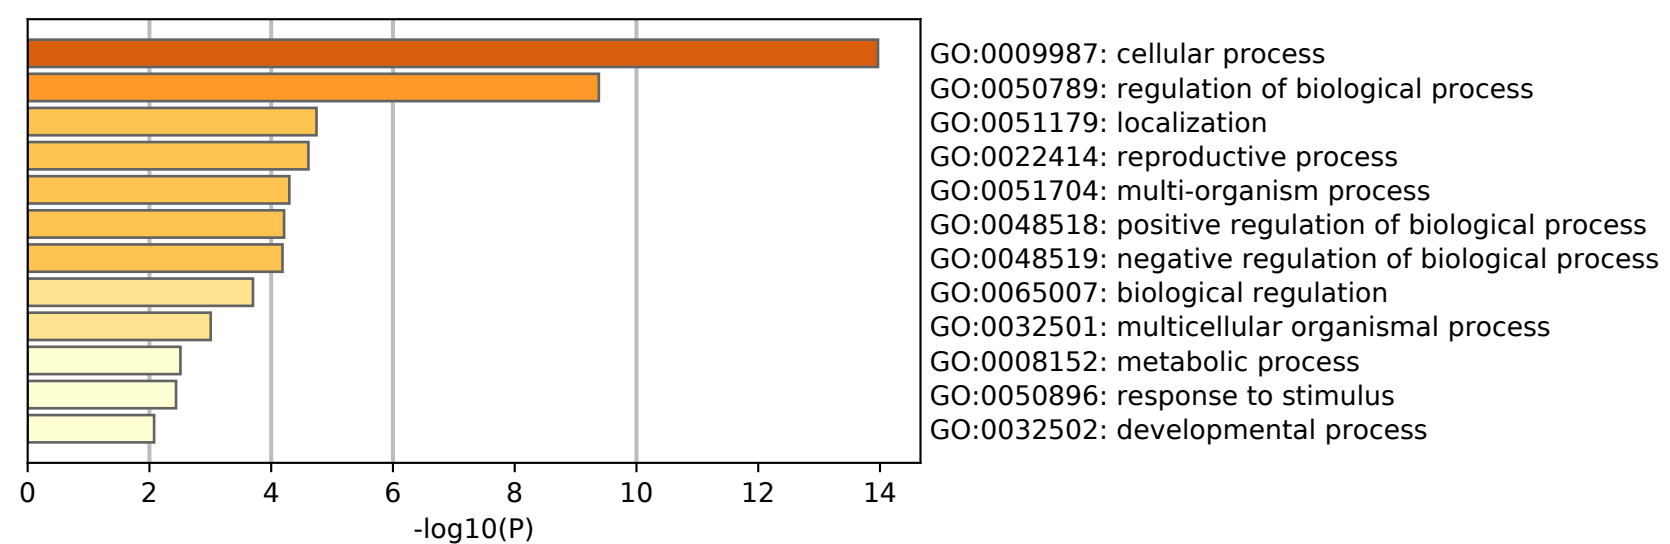

Supplement: table1-data1 [file elife-81290-table1-data1-v2.zip]

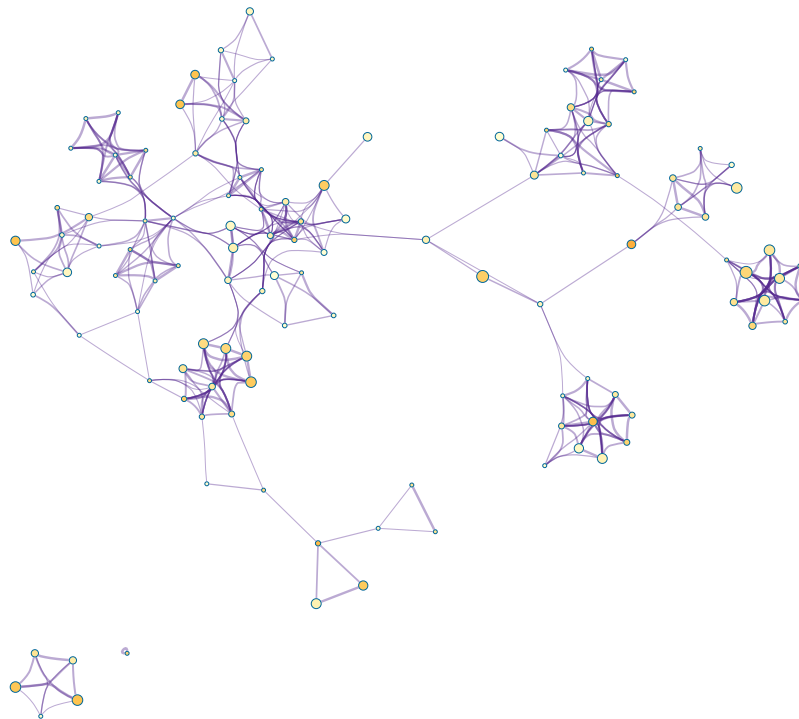



 created by  
<http://metascape.org>

Supplement: table1-data1 [file elife-81290-table1-data1-v2.zip]

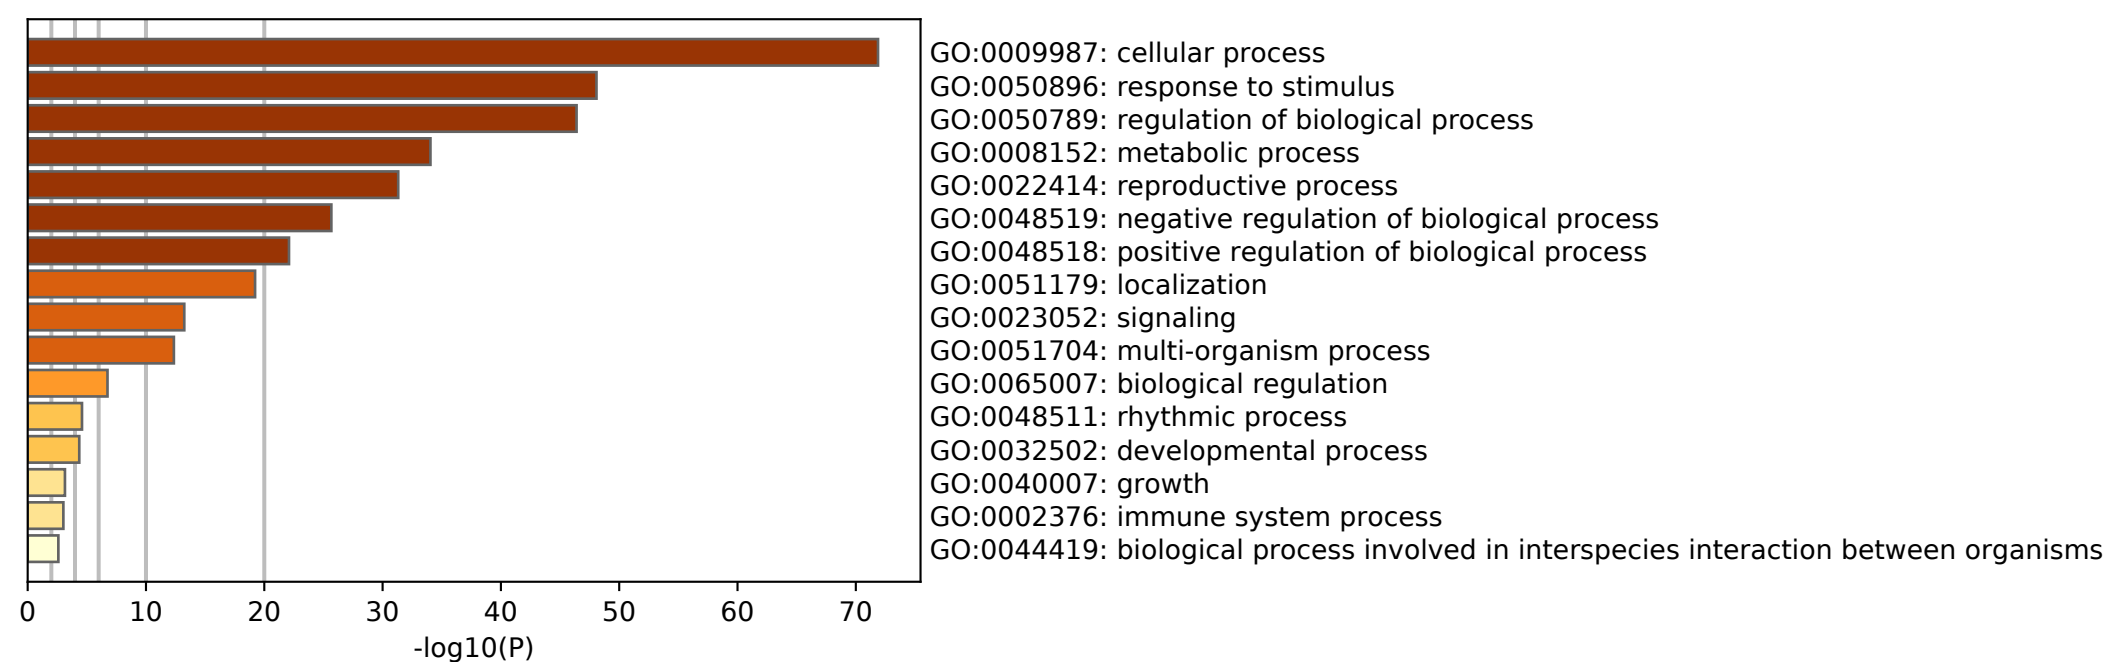

Supplement: table1-data1 [file elife-81290-table1-data1-v2.zip]

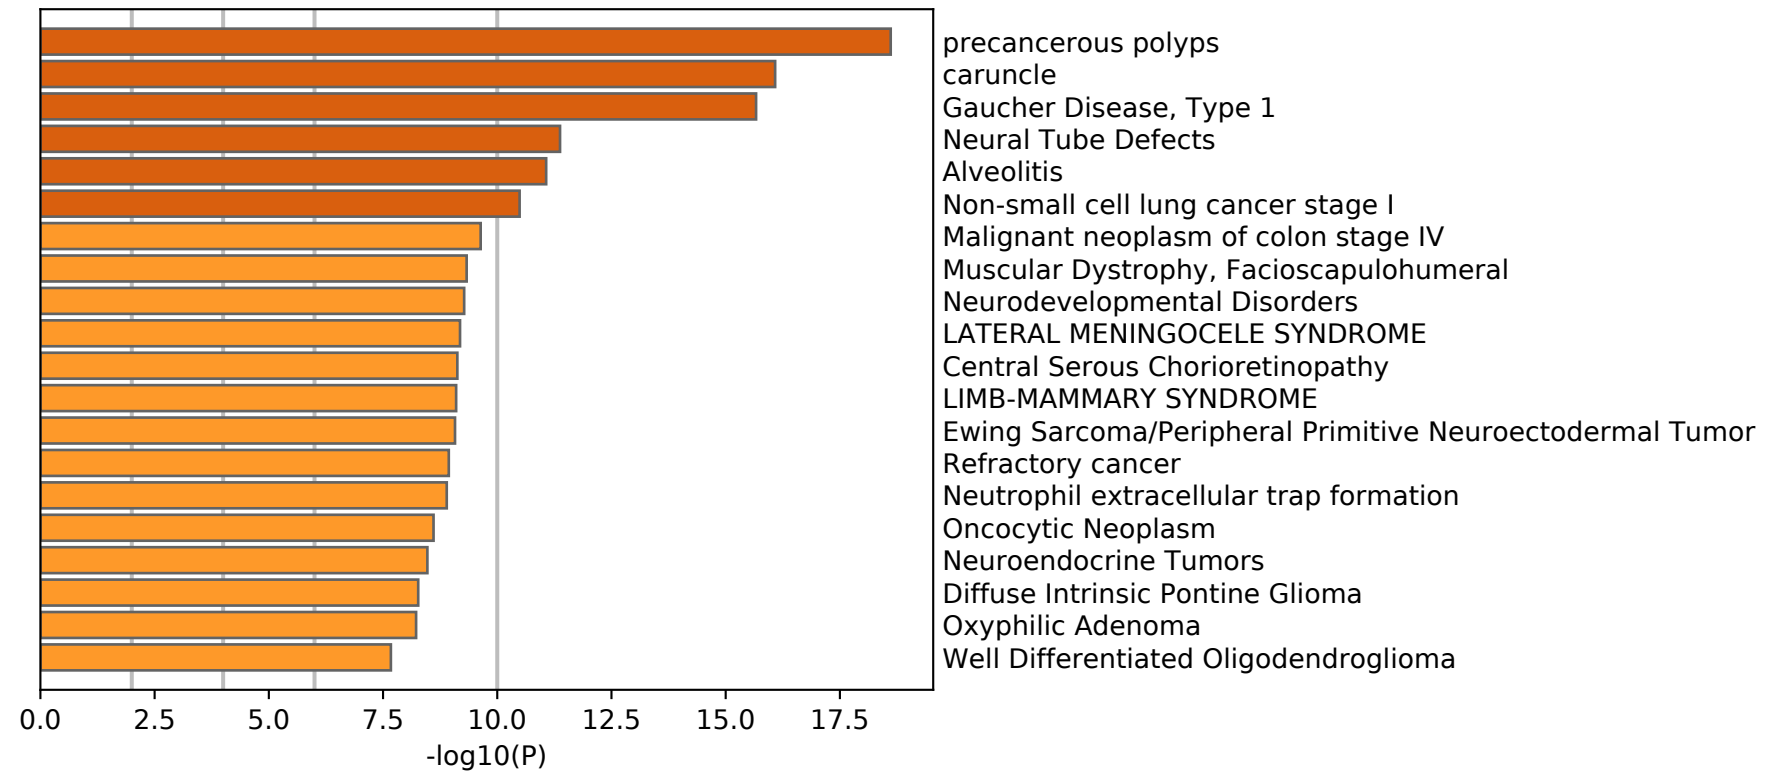

Supplement: table1-data1 [file elife-81290-table1-data1-v2.zip]

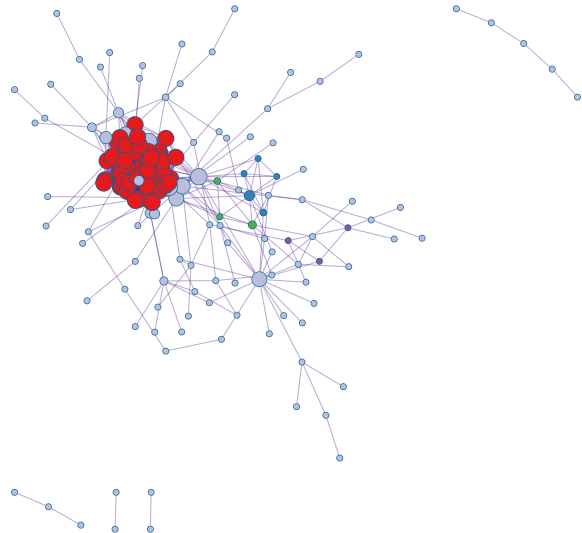

■ MCODE1  
■ MCODE2  
■ MCODE3  
■ MCODE4

 created by  
<http://metascape.org>

Supplement: table1-data1 [file elife-81290-table1-data1-v2.zip]

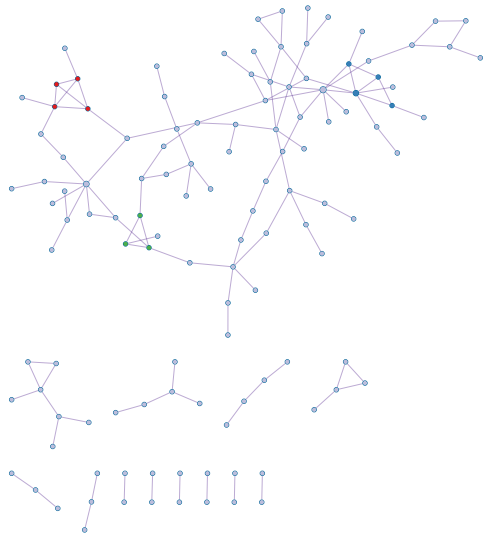

■ MCODE1  
■ MCODE2  
■ MCODE3

 created by  
<http://metascape.org>

Supplement: table1-data1 [file elife-81290-table1-data1-v2.zip]

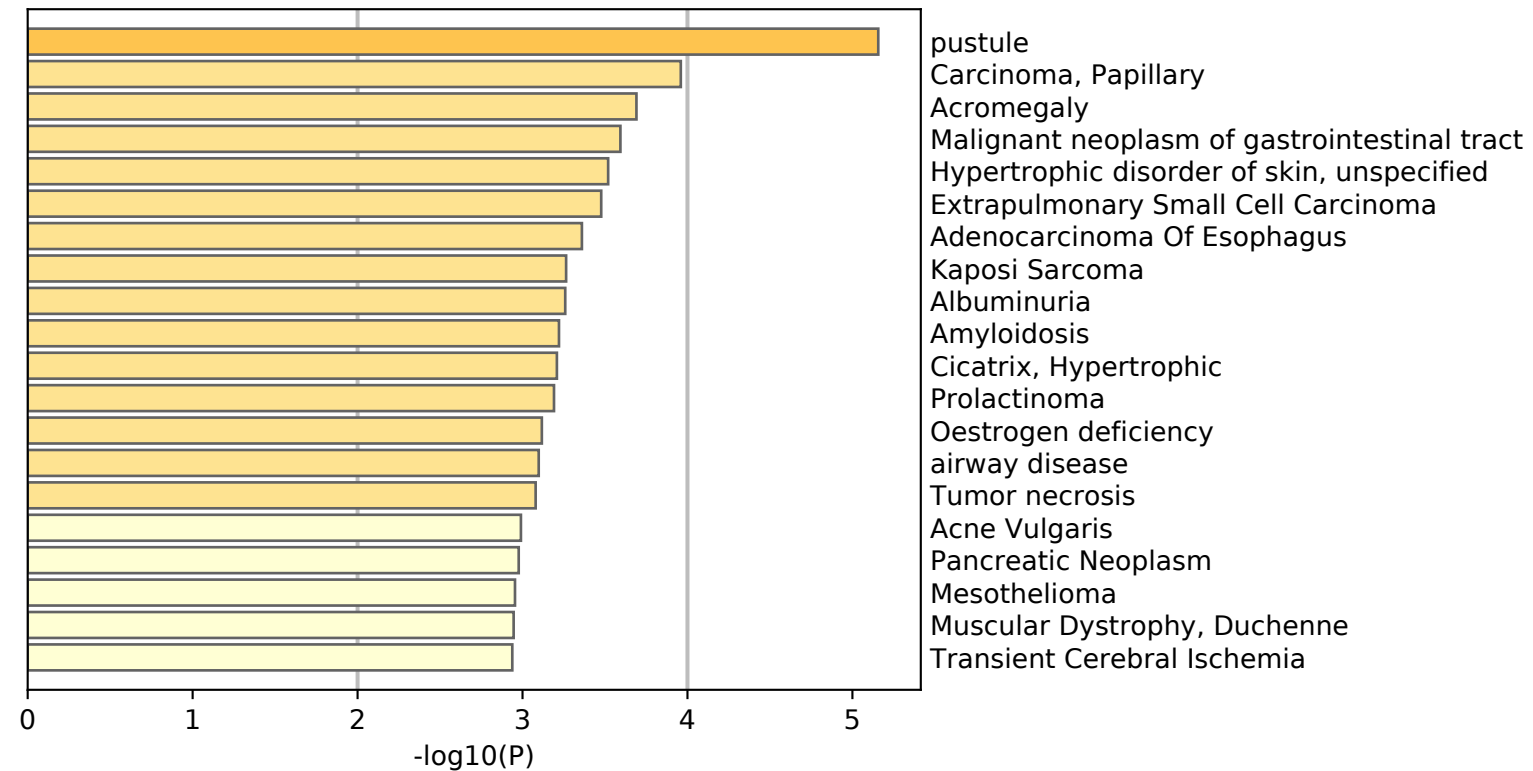

Supplement: table1-data1 [file elife-81290-table1-data1-v2.zip]

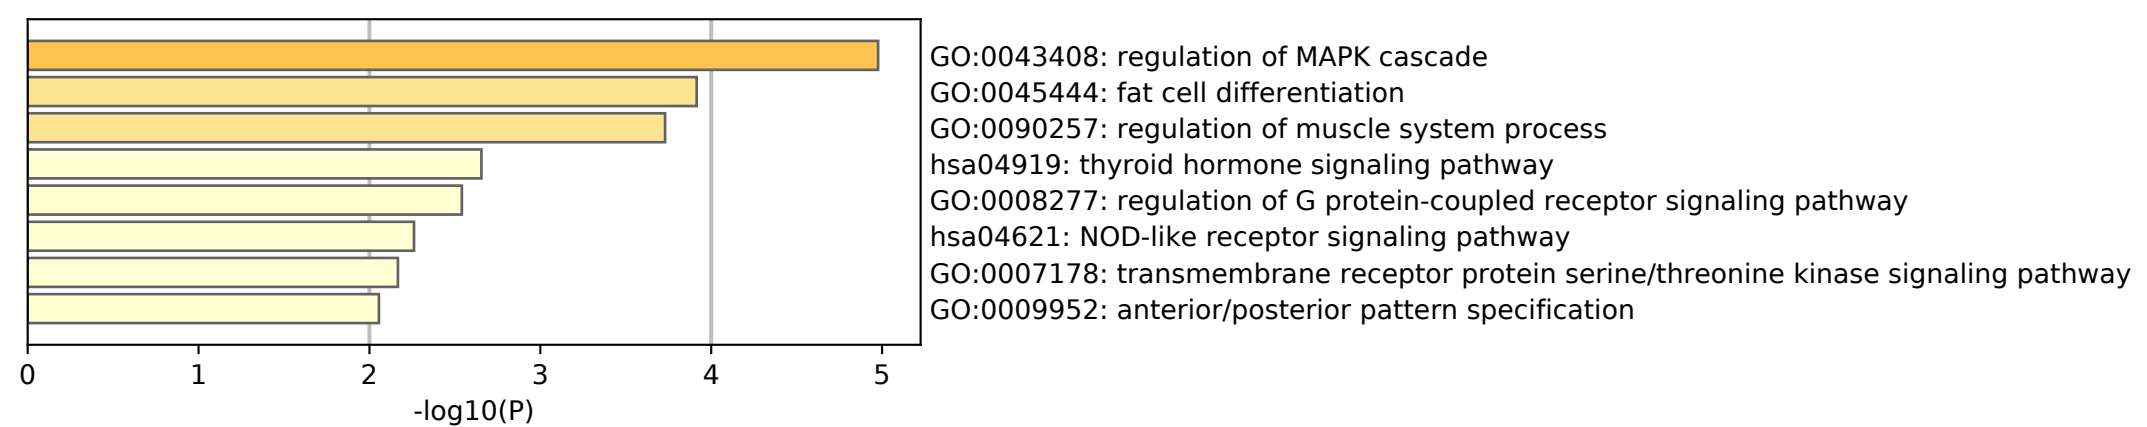

Supplement: table1-data1 [file elife-81290-table1-data1-v2.zip]

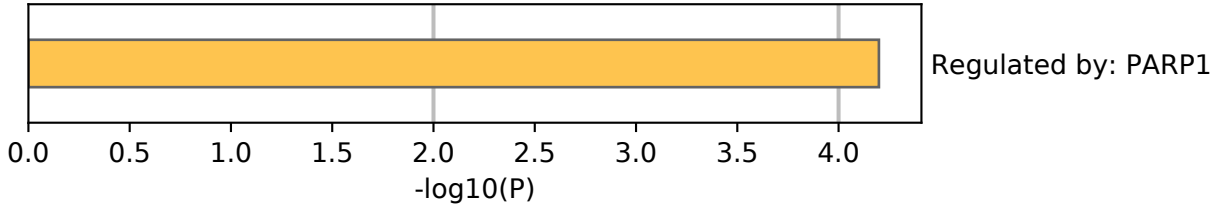

Supplement: table1-data1 [file elife-81290-table1-data1-v2.zip]

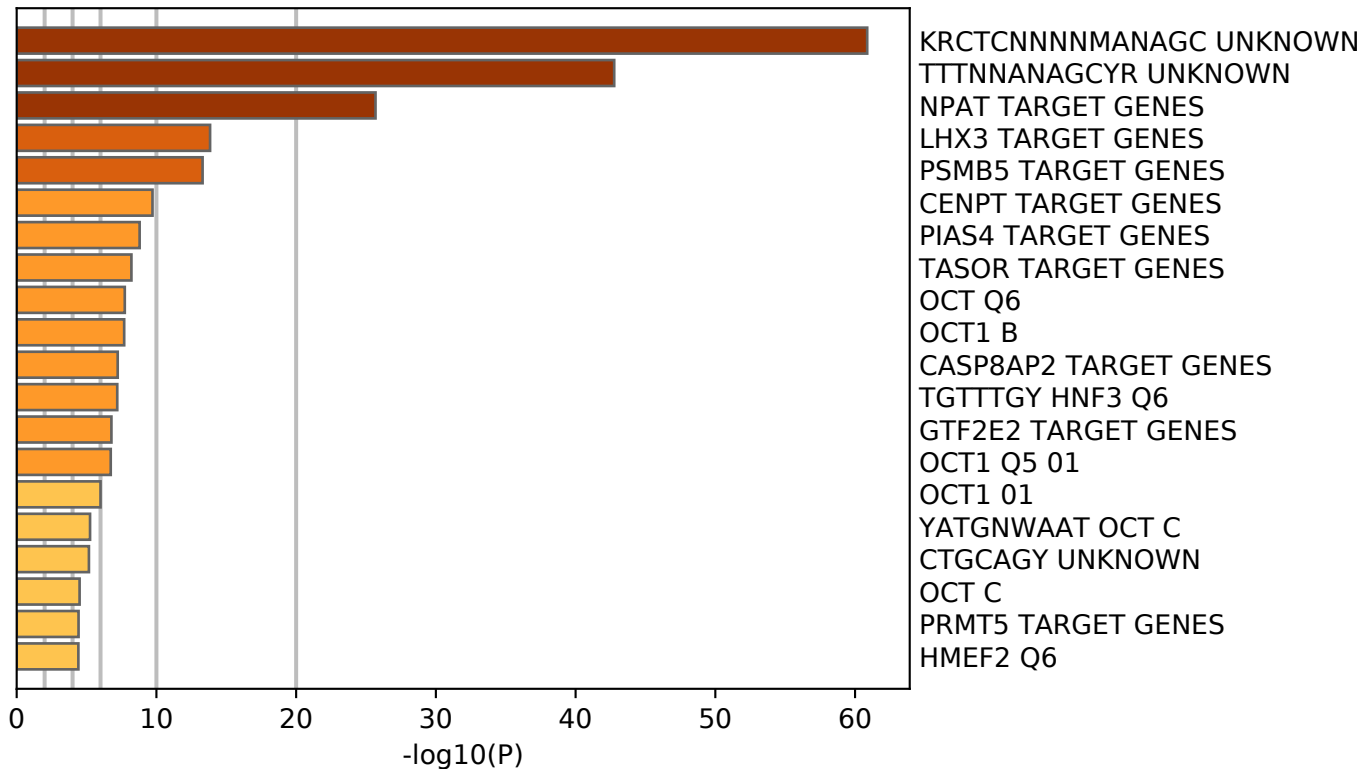

Supplement: table1-data1 [file elife-81290-table1-data1-v2.zip]

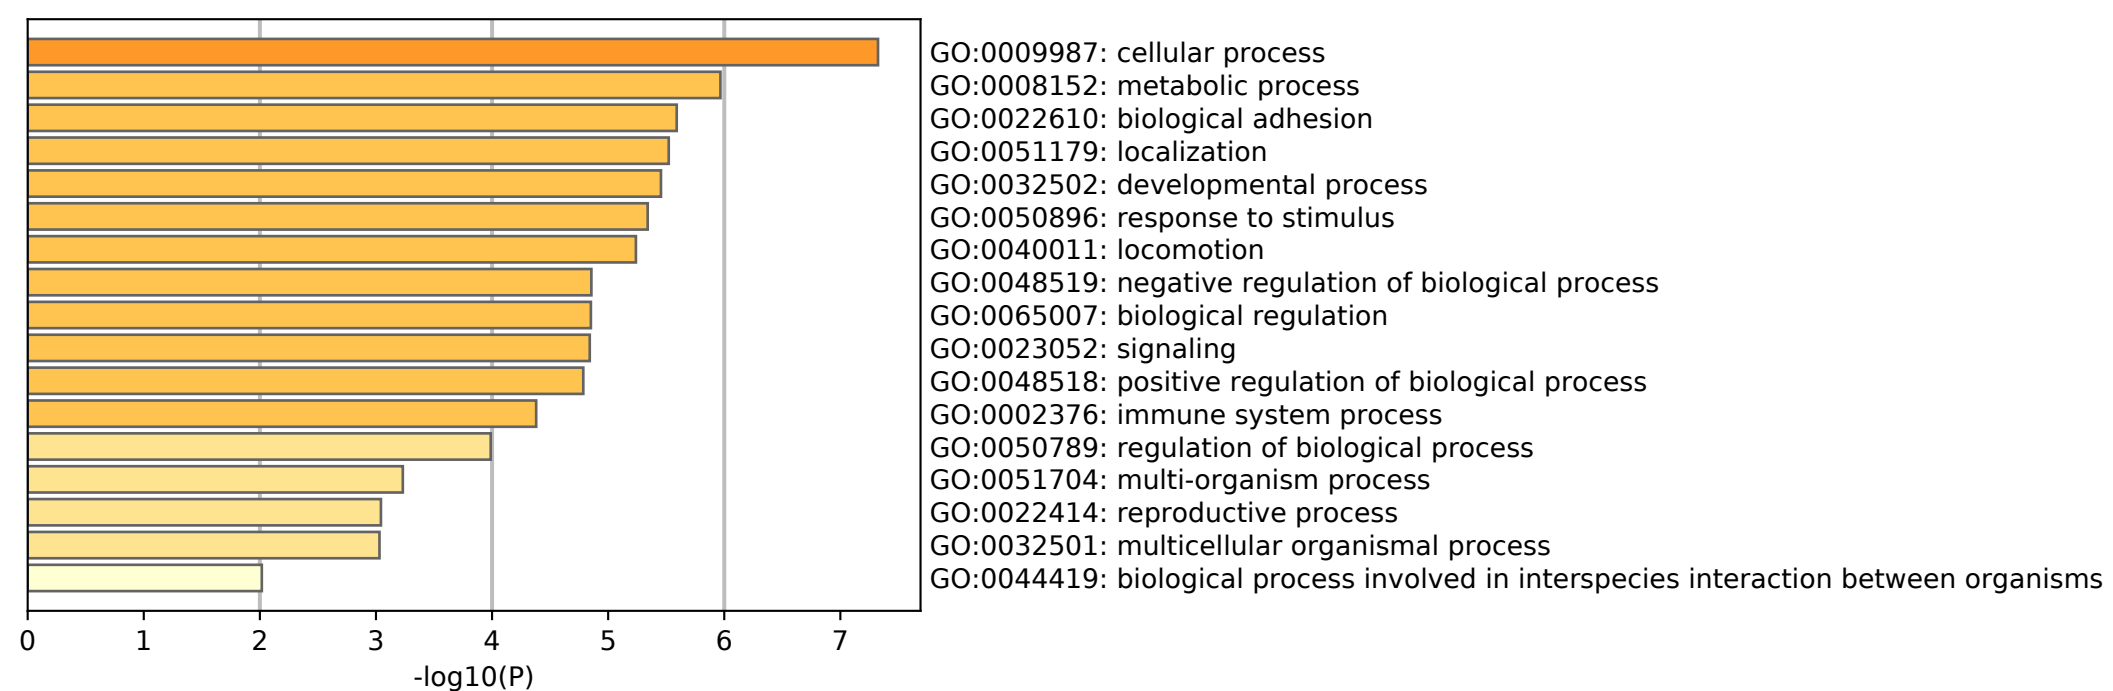

Supplement: table1-data1 [file elife-81290-table1-data1-v2.zip]

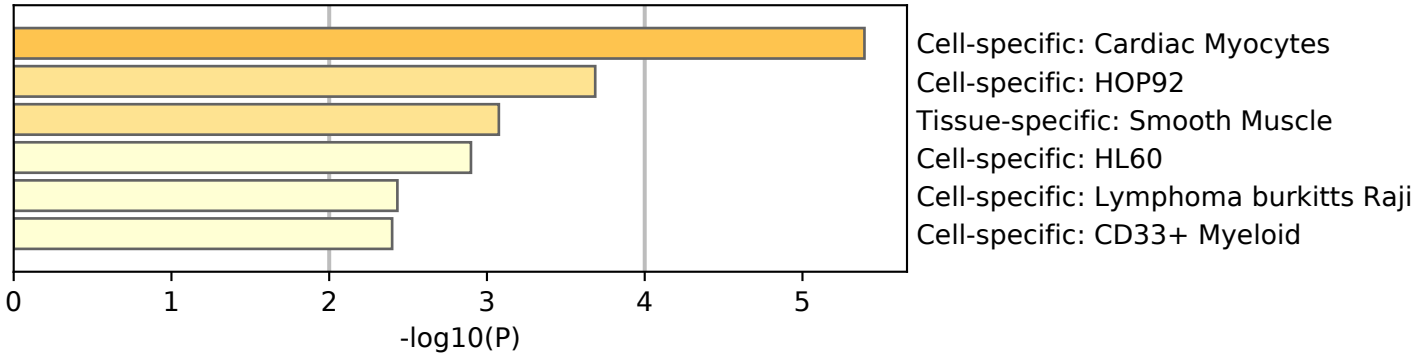

Supplement: table1-data1 [file elife-81290-table1-data1-v2.zip]

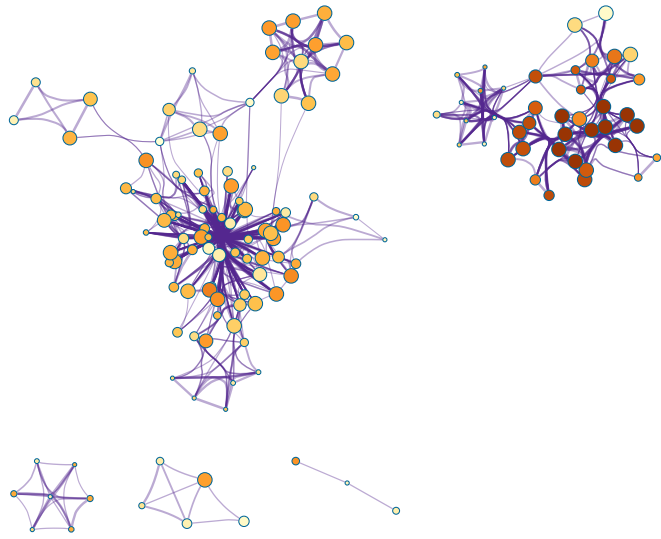



 created by  
<http://metascape.org>

Supplement: table1-data1 [file elife-81290-table1-data1-v2.zip]

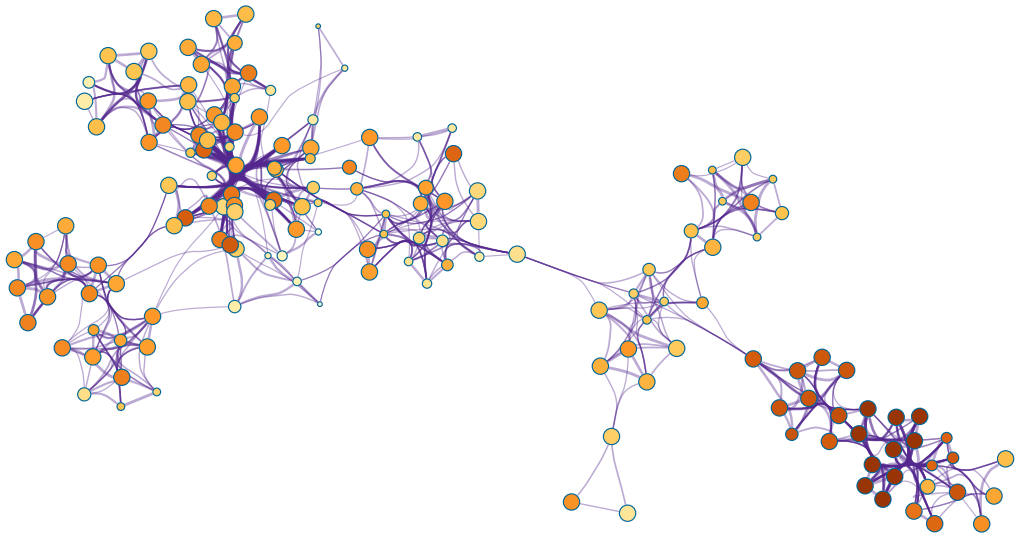



 created by  
<http://metascape.org>

Supplement: table1-data1 [file elife-81290-table1-data1-v2.zip]

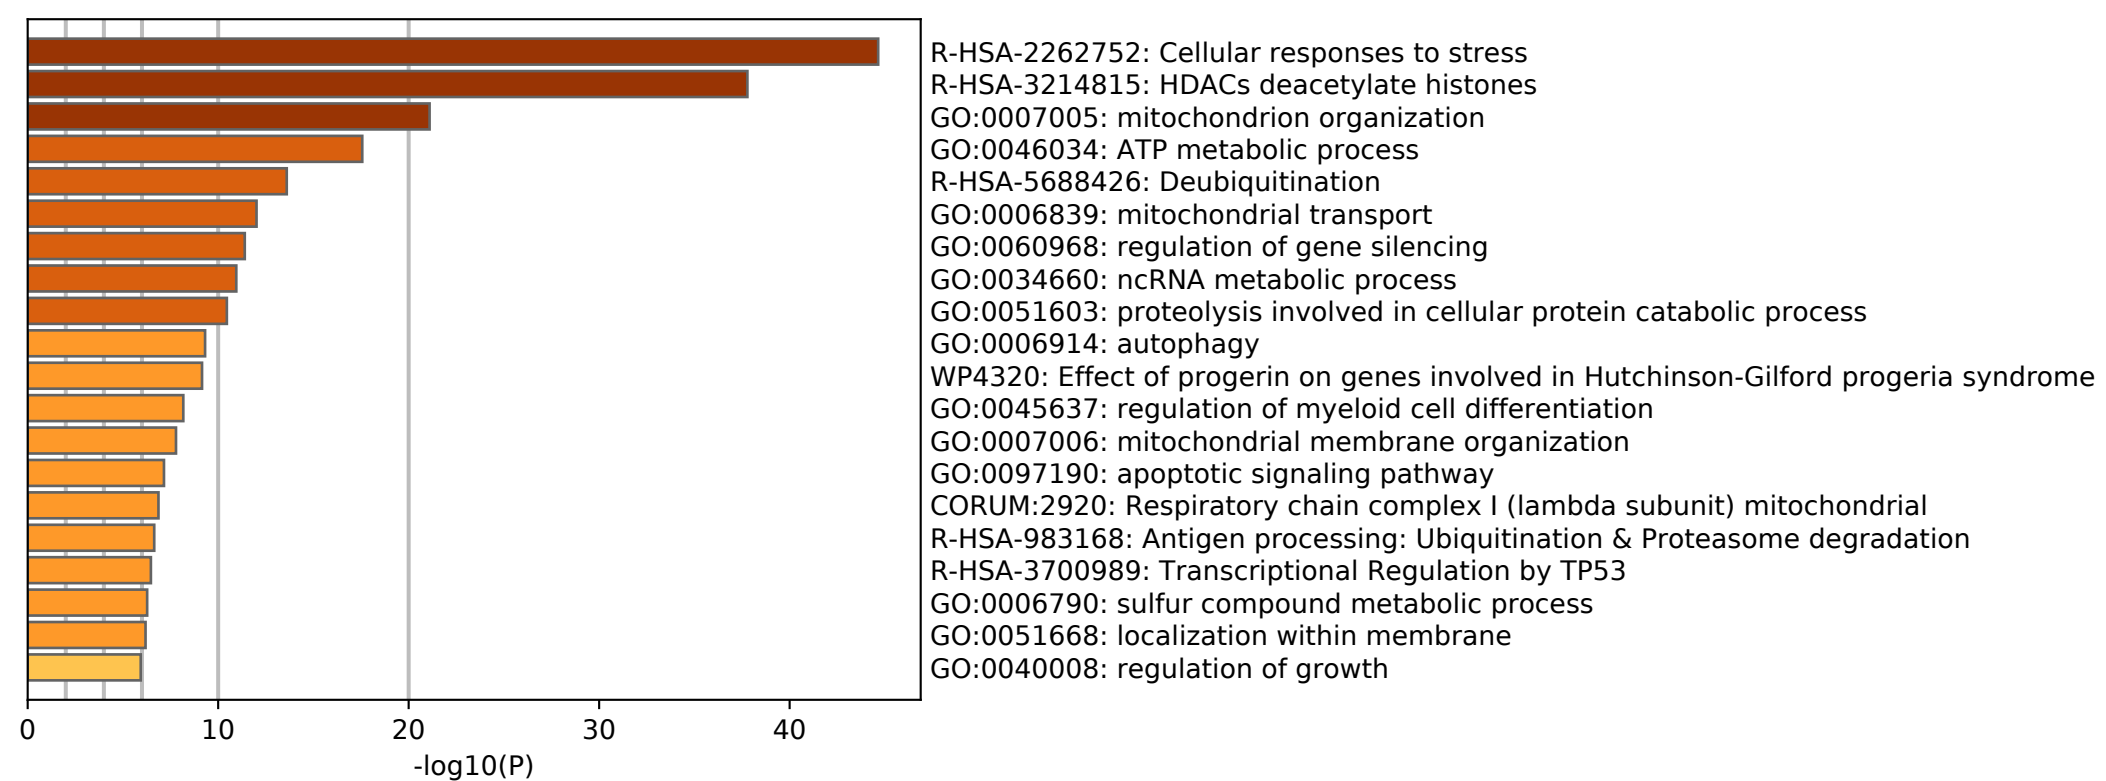

Supplement: table1-data1 [file elife-81290-table1-data1-v2.zip]

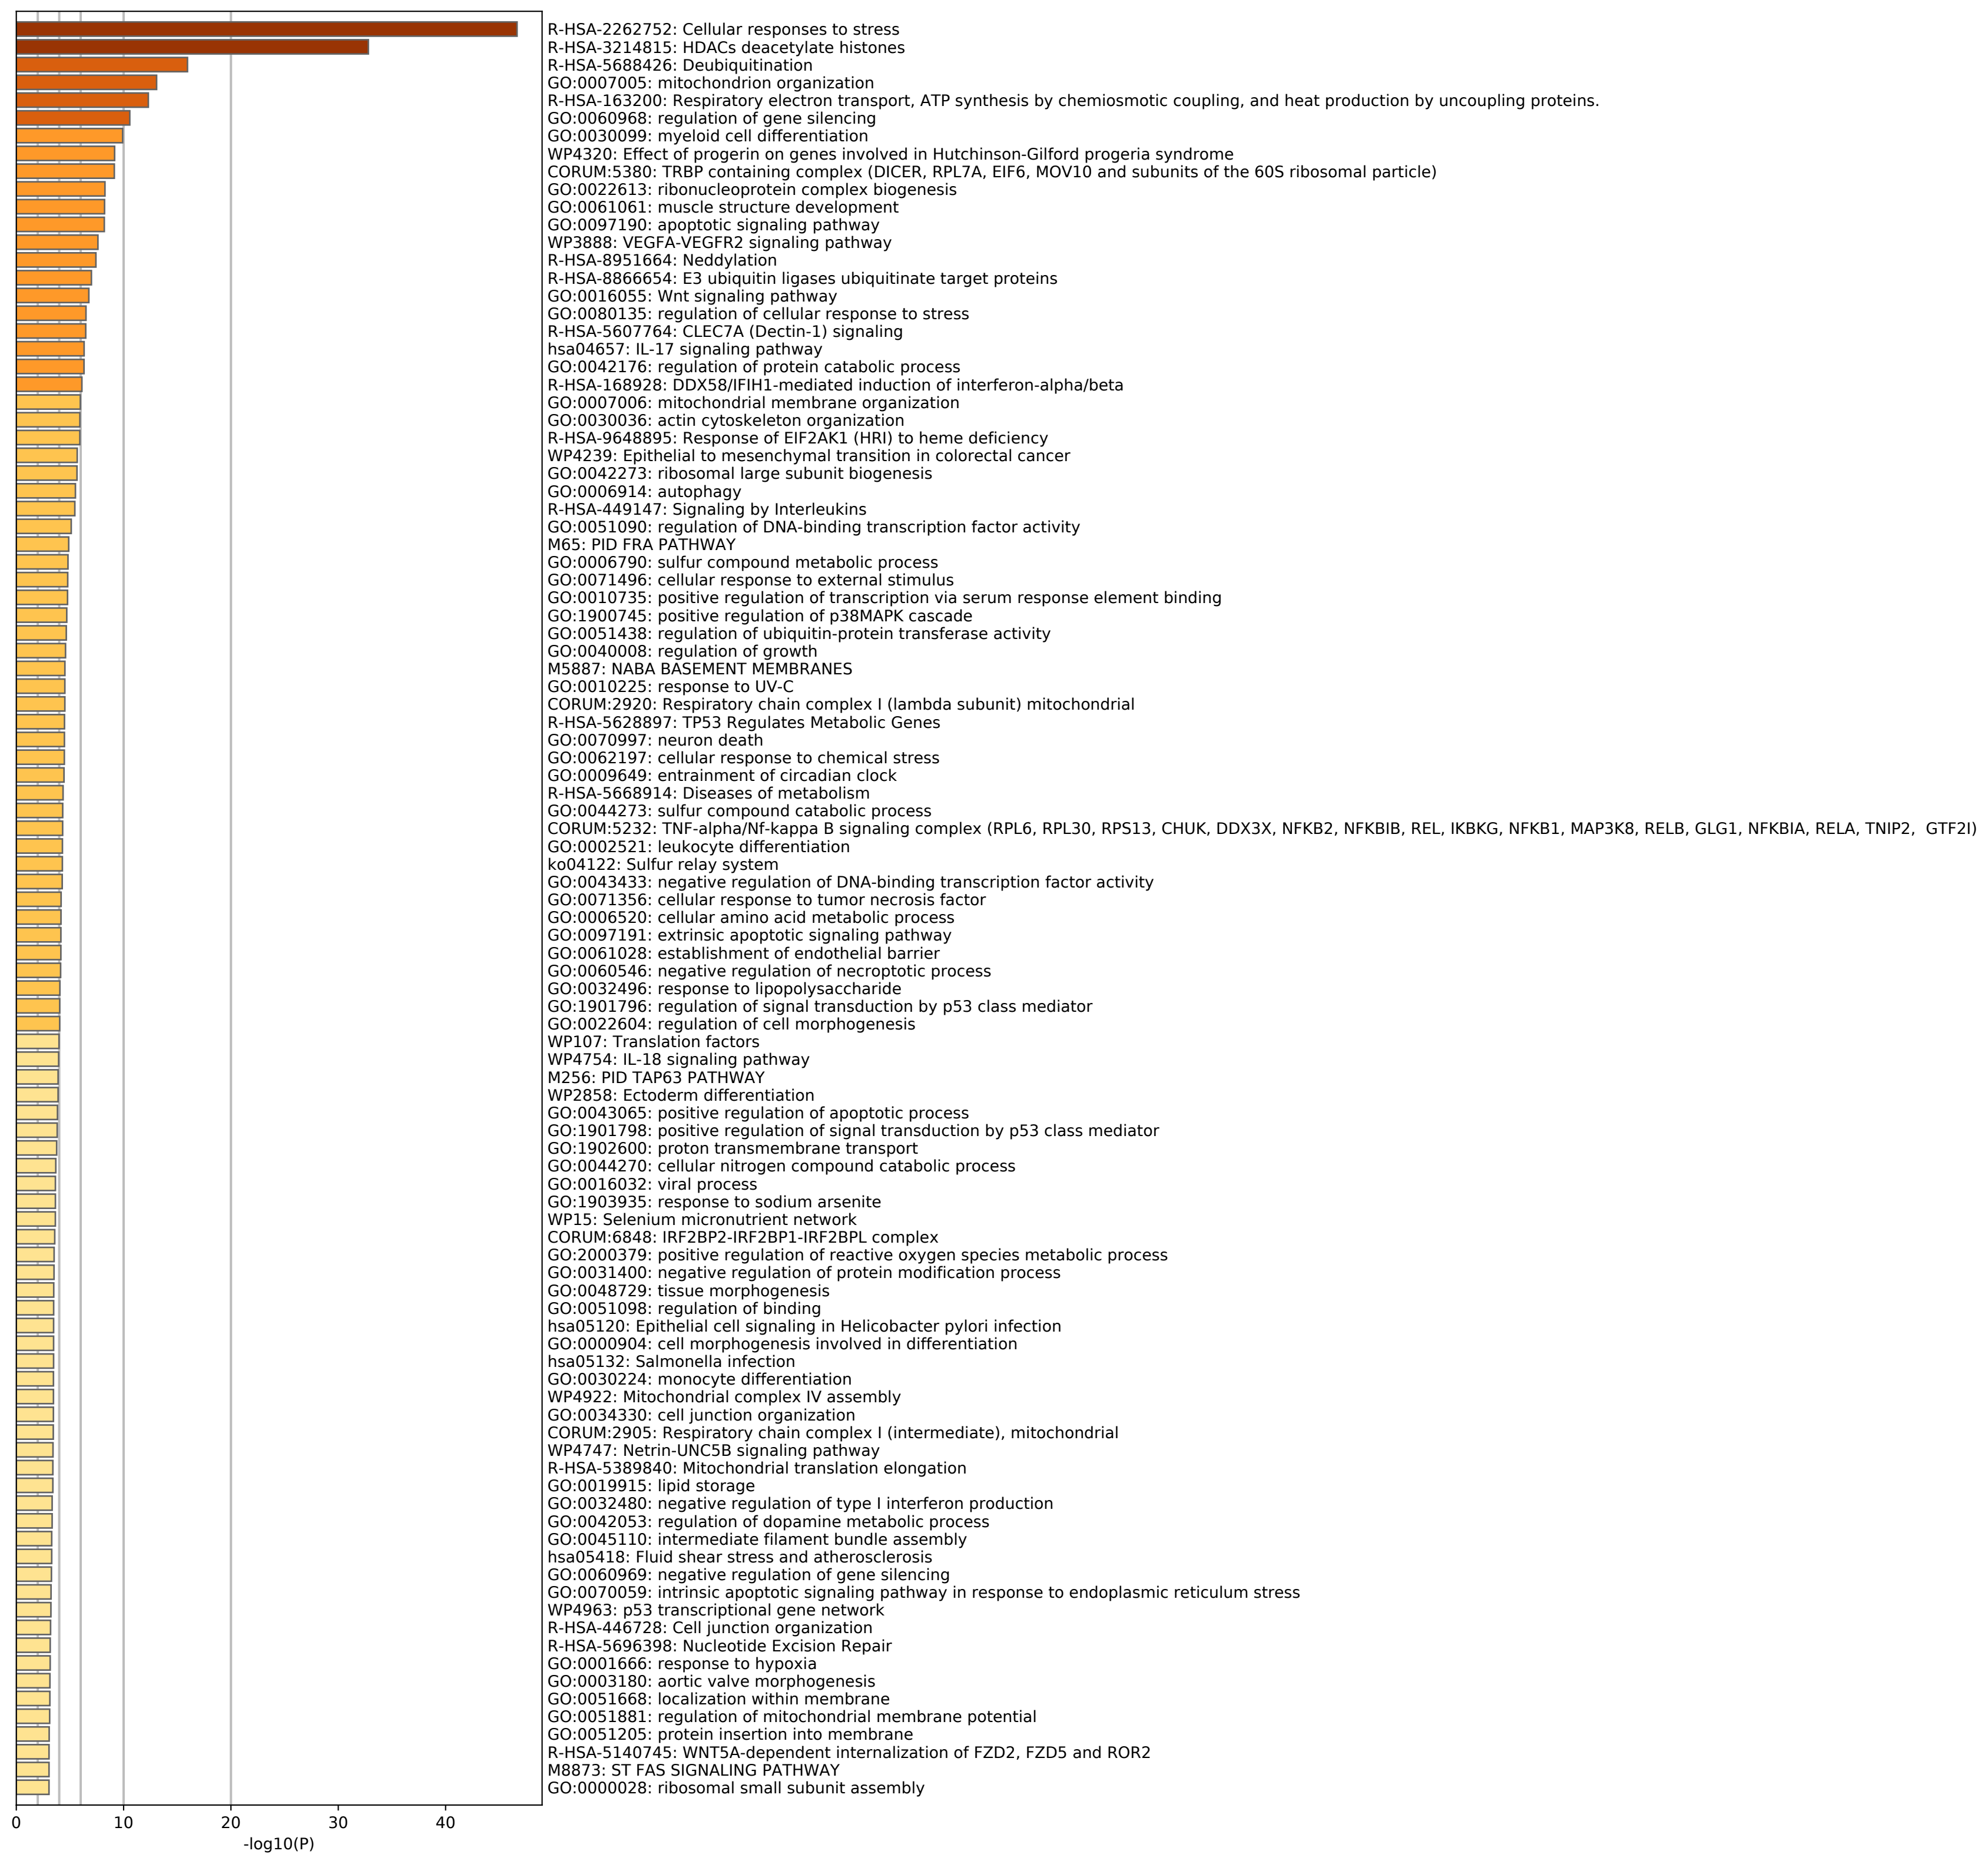

Supplement: table1-data1 [file elife-81290-table1-data1-v2.zip]

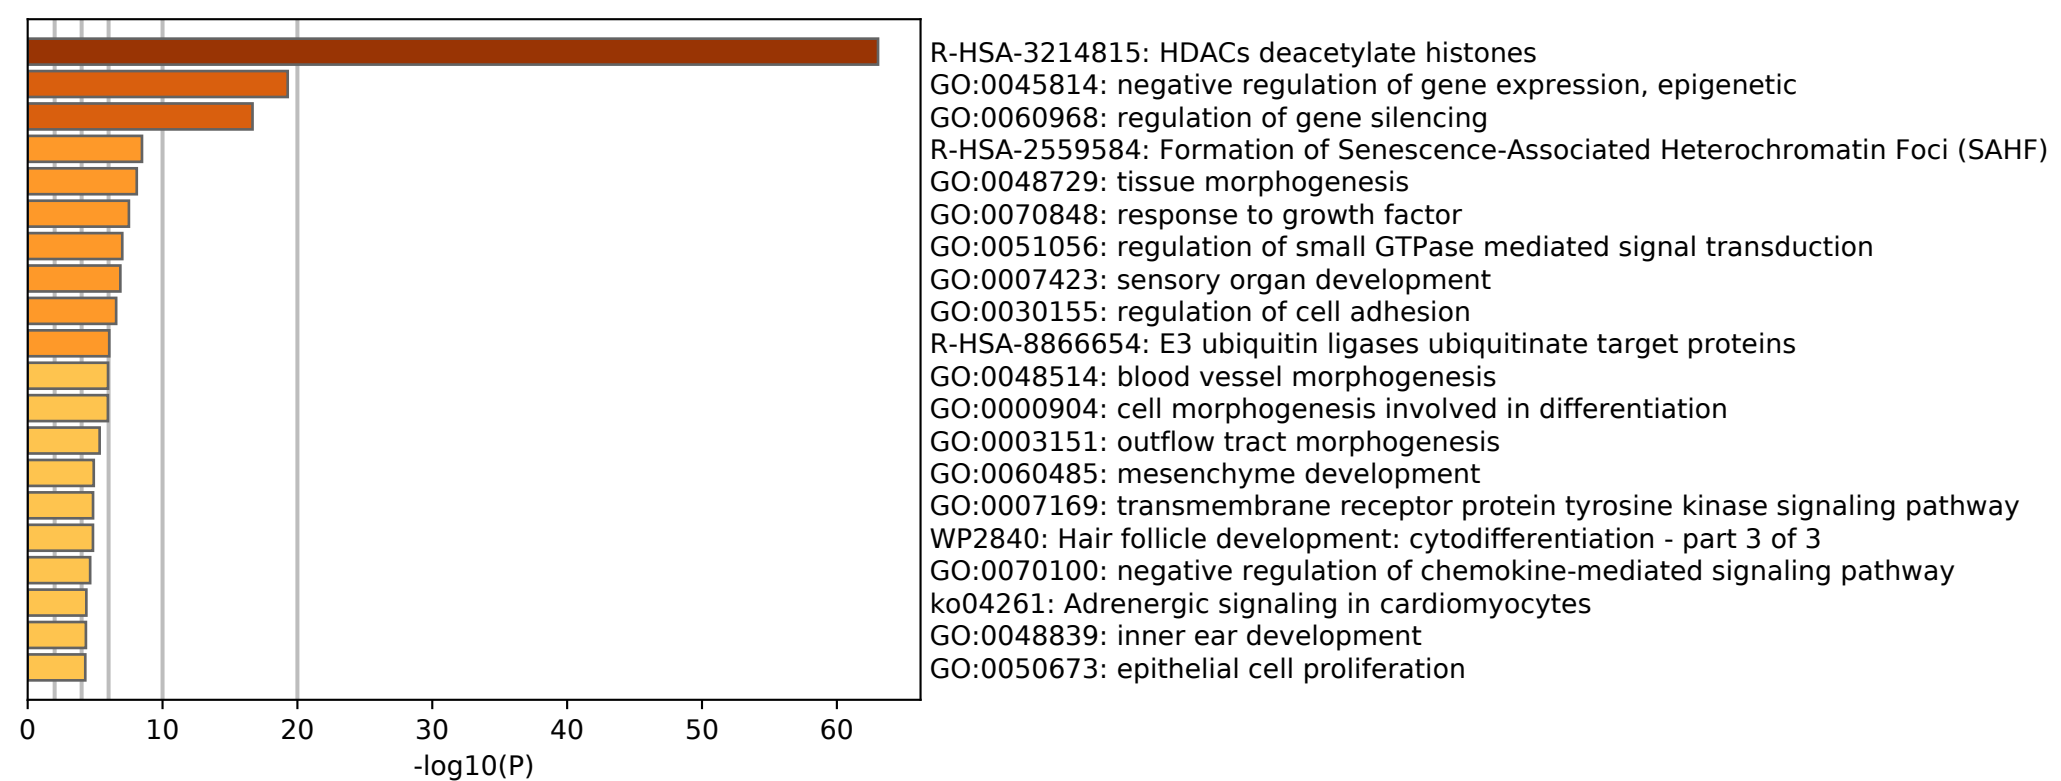

Supplement: table1-data1 [file elife-81290-table1-data1-v2.zip]

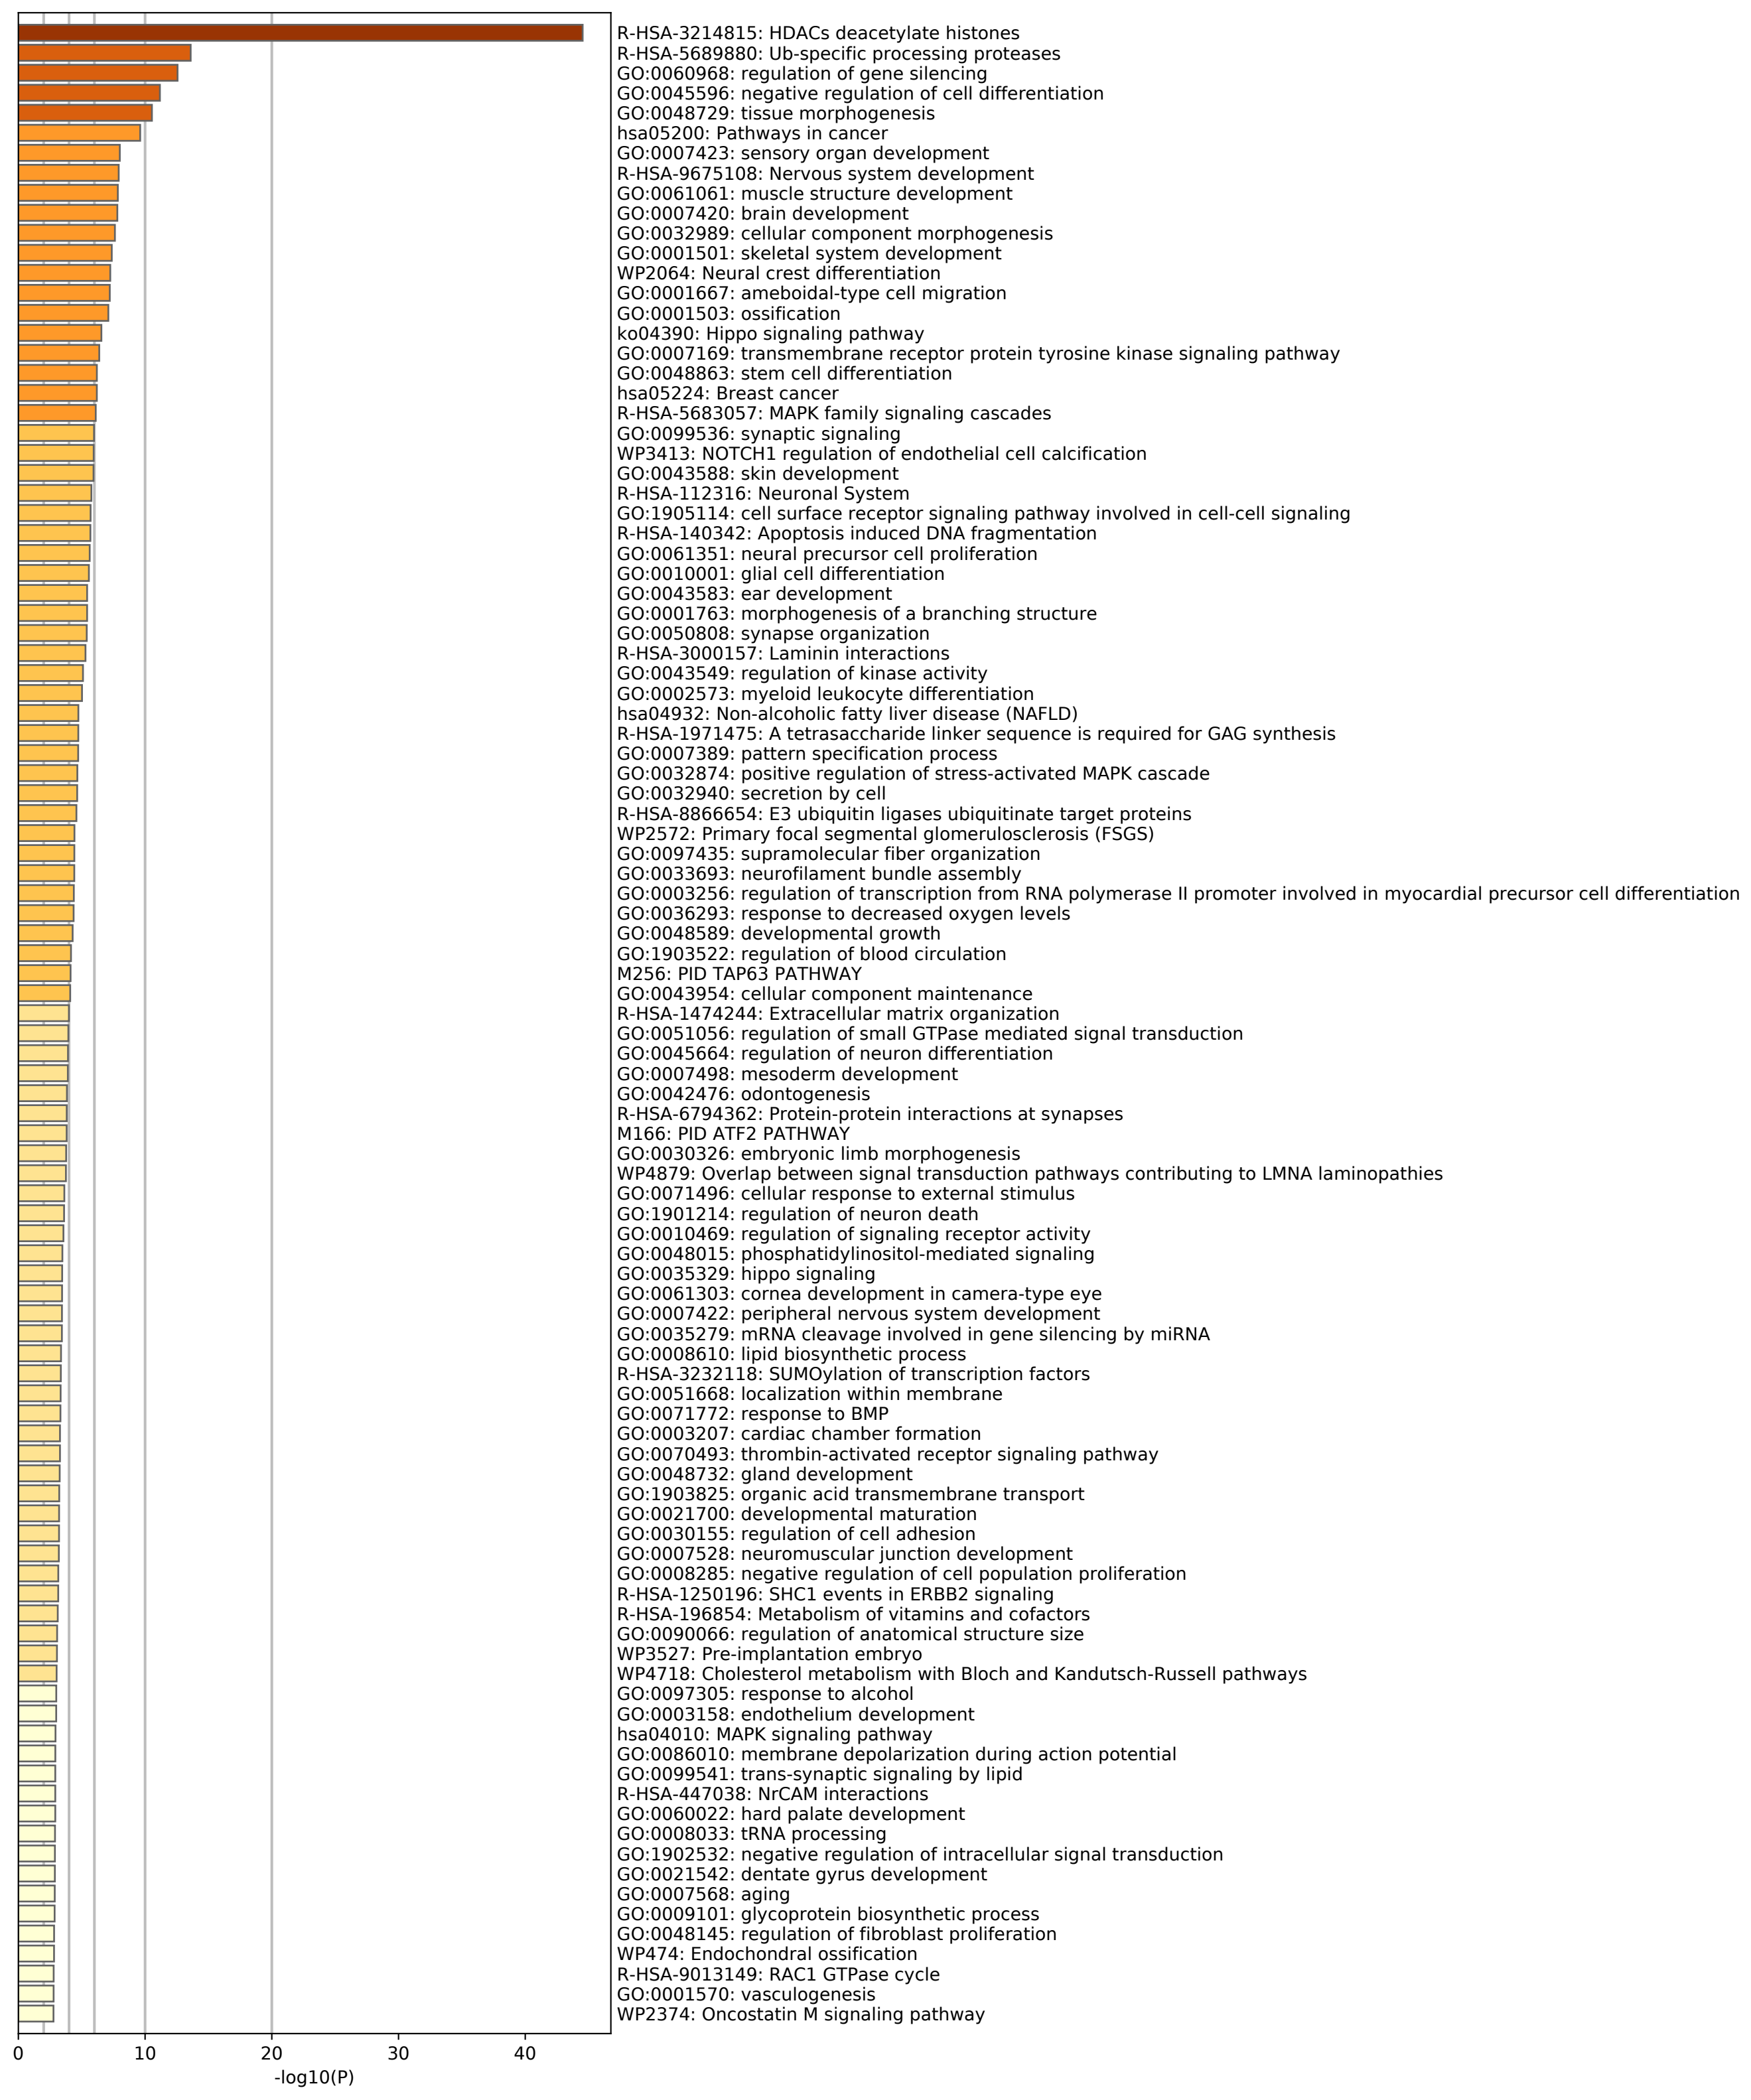

Supplement: table1-data1 [file elife-81290-table1-data1-v2.zip]

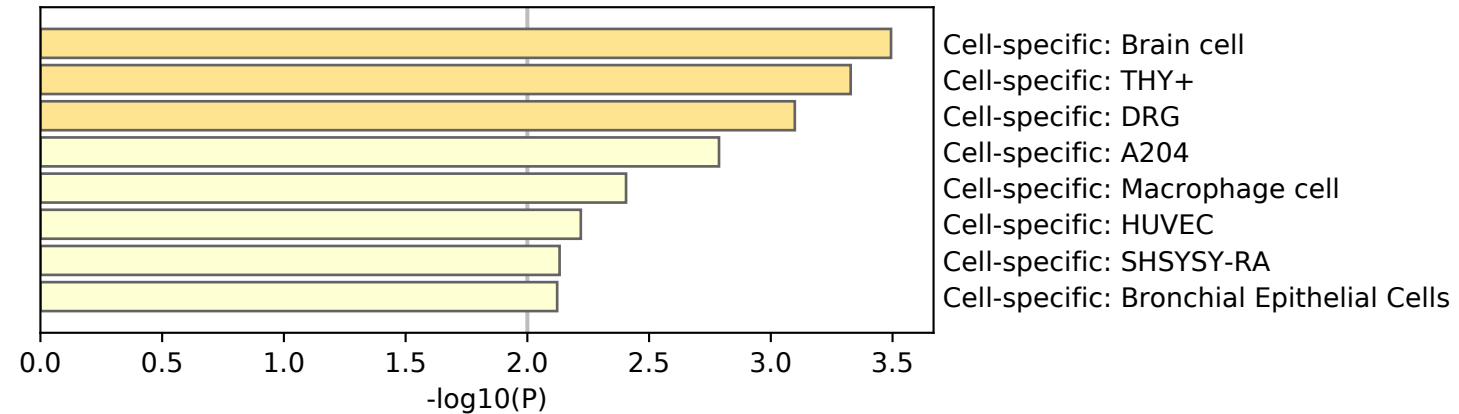

Supplement: table1-data1 [file elife-81290-table1-data1-v2.zip]

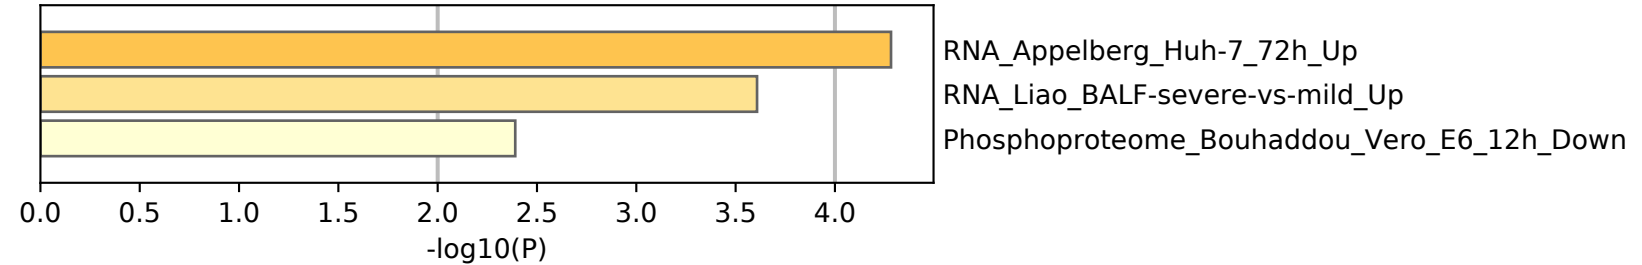

Supplement: table1-data1 [file elife-81290-table1-data1-v2.zip]

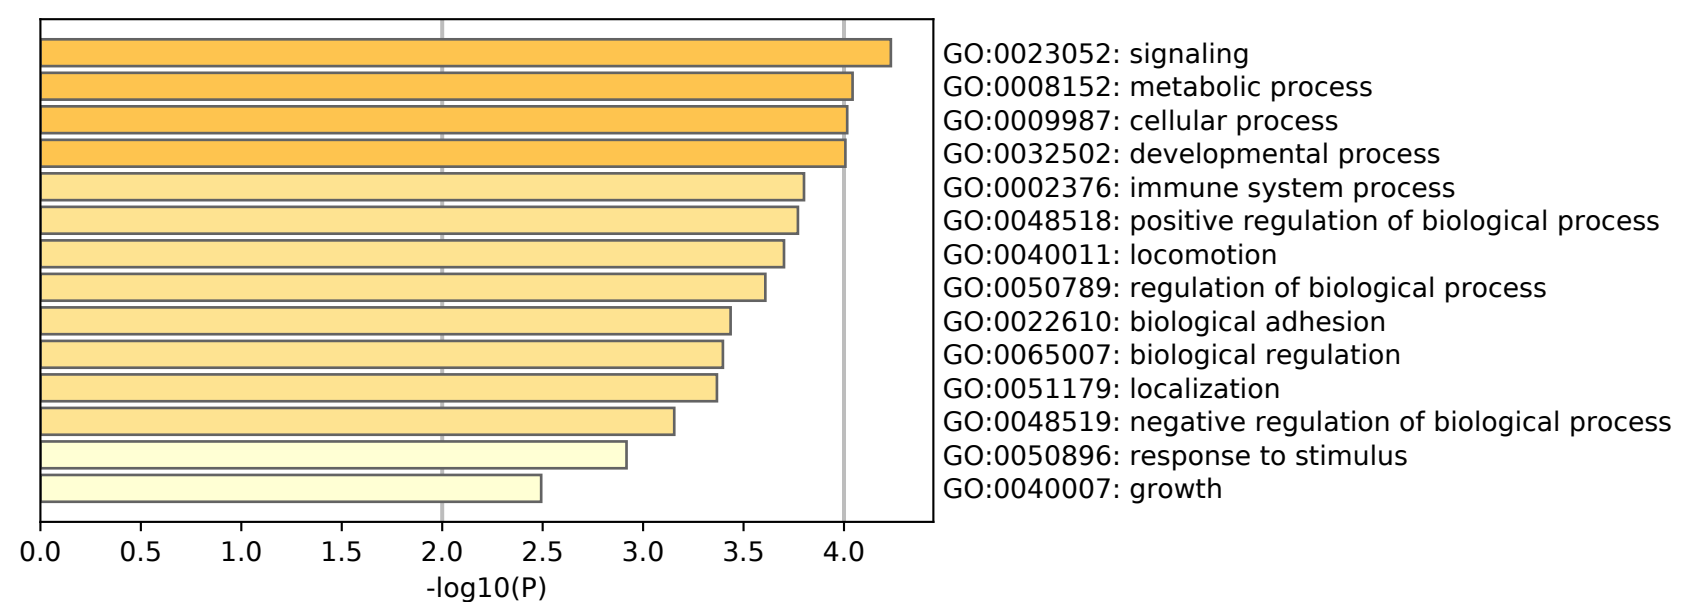

Supplement: table1-data1 [file elife-81290-table1-data1-v2.zip]

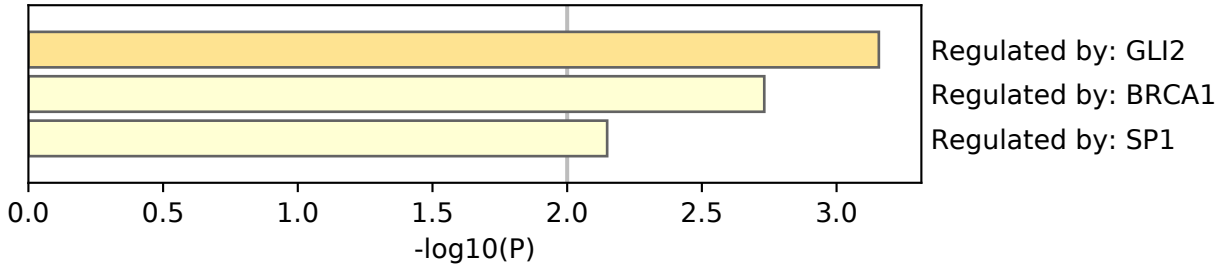

Supplement: table1-data1 [file elife-81290-table1-data1-v2.zip]

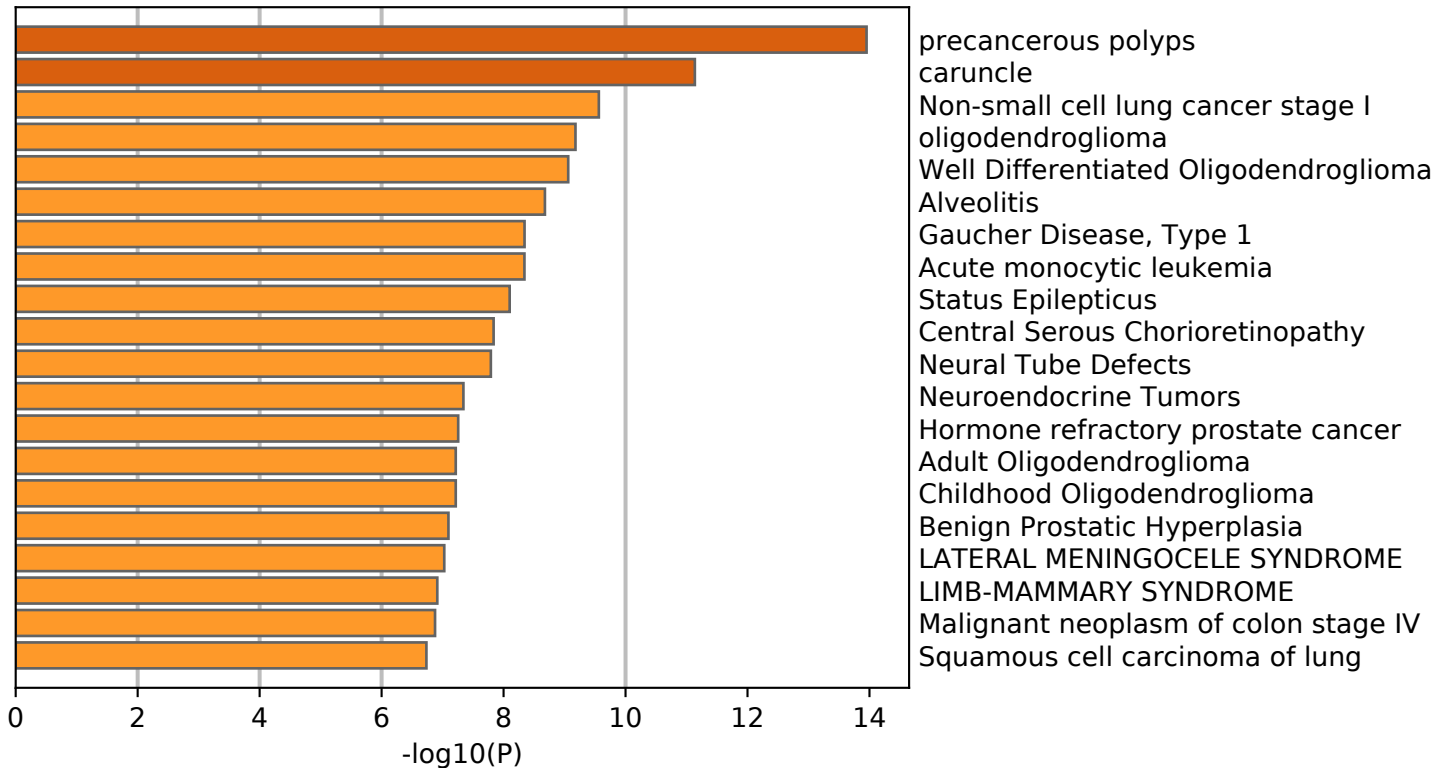

Supplement: table1-data1 [file elife-81290-table1-data1-v2.zip]

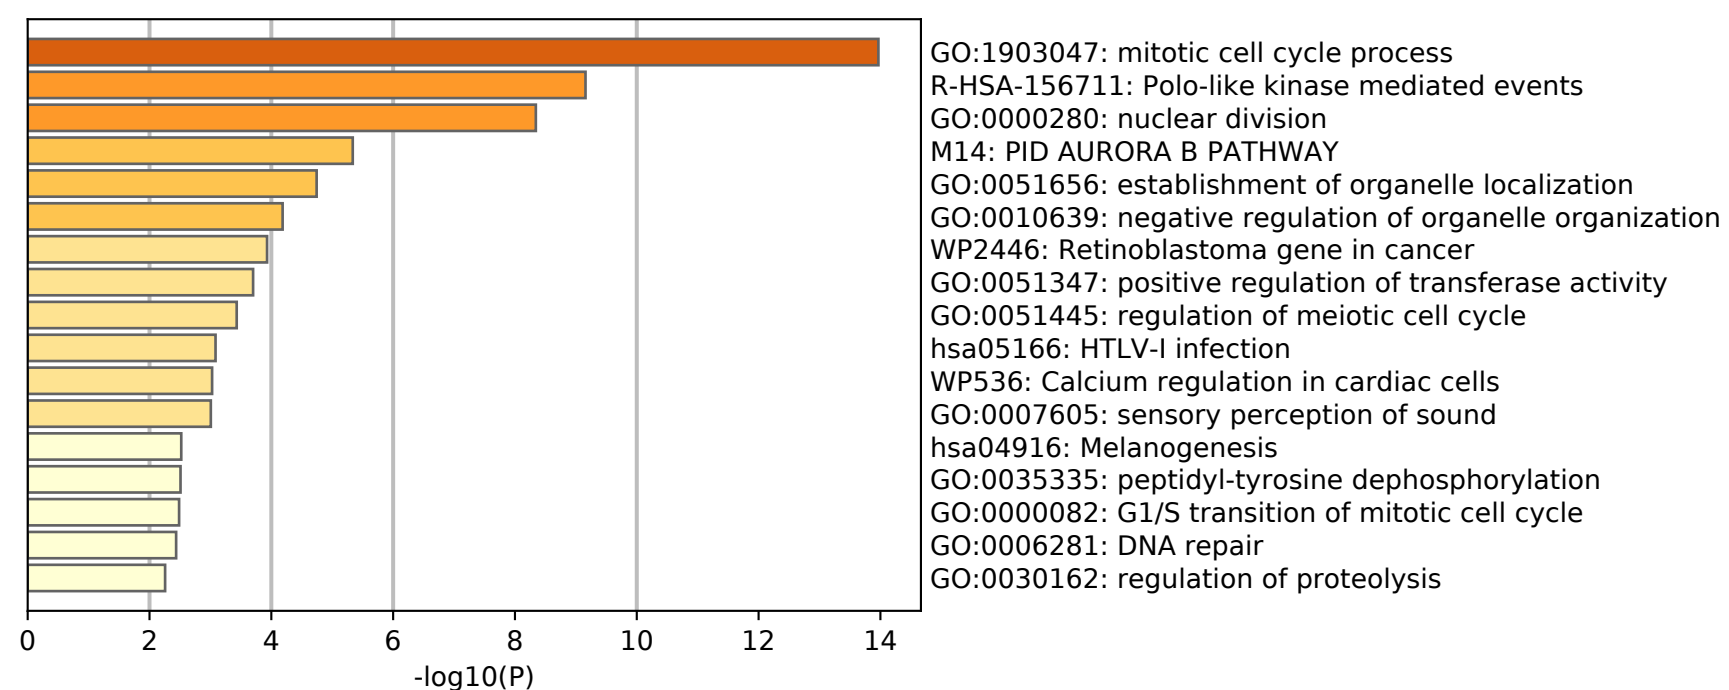

Supplement: table1-data1 [file elife-81290-table1-data1-v2.zip]

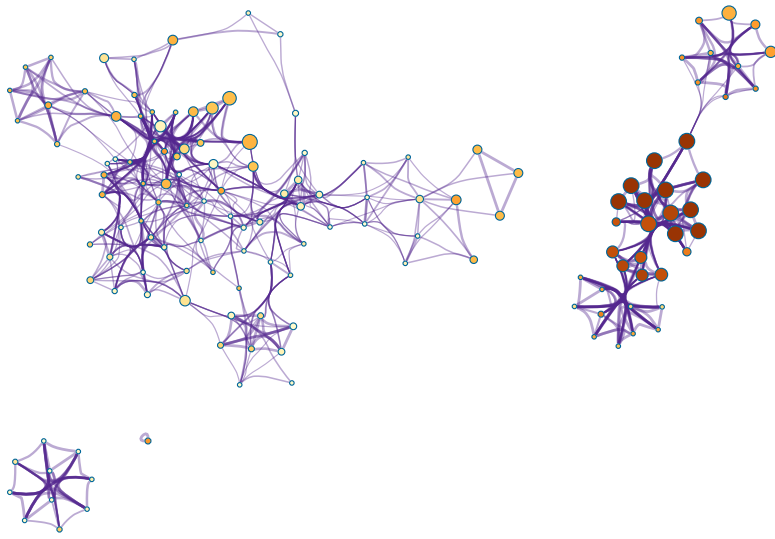



 created by  
<http://metascape.org>

Supplement: table1-data1 [file elife-81290-table1-data1-v2.zip]

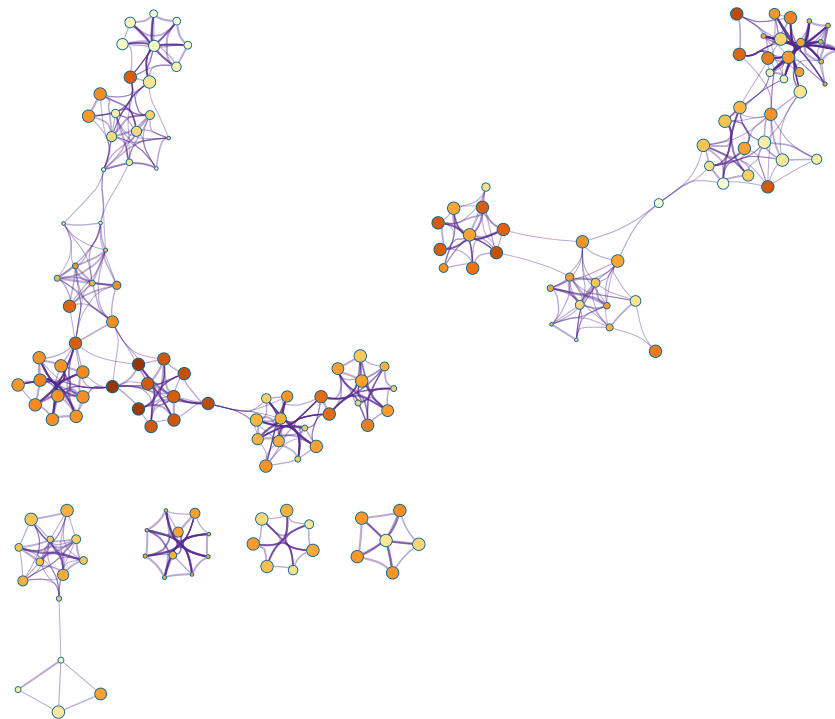



 created by  
<http://metascape.org>

Supplement: table1-data1 [file elife-81290-table1-data1-v2.zip]

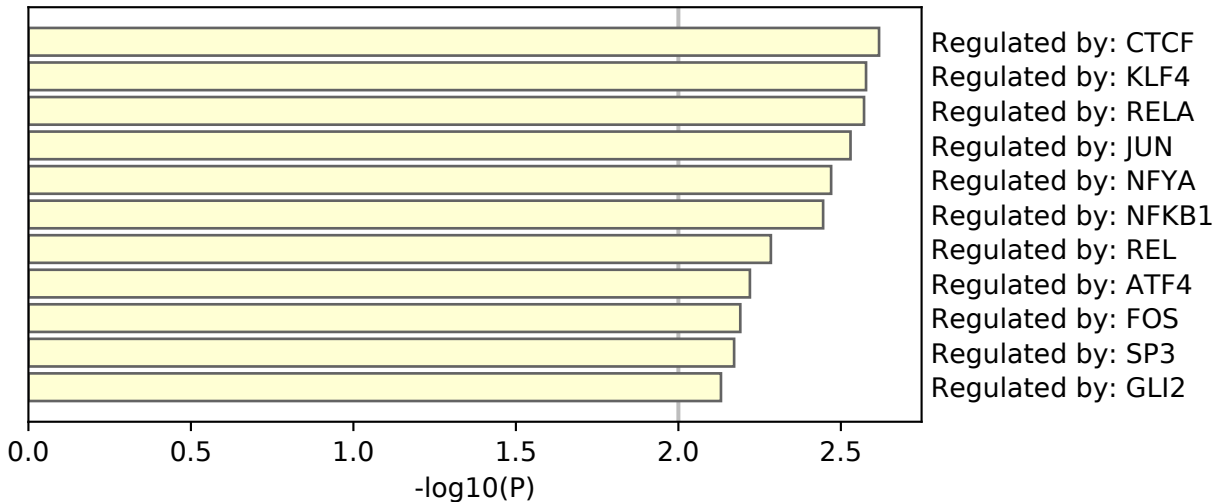

Supplement: table1-data1 [file elife-81290-table1-data1-v2.zip]

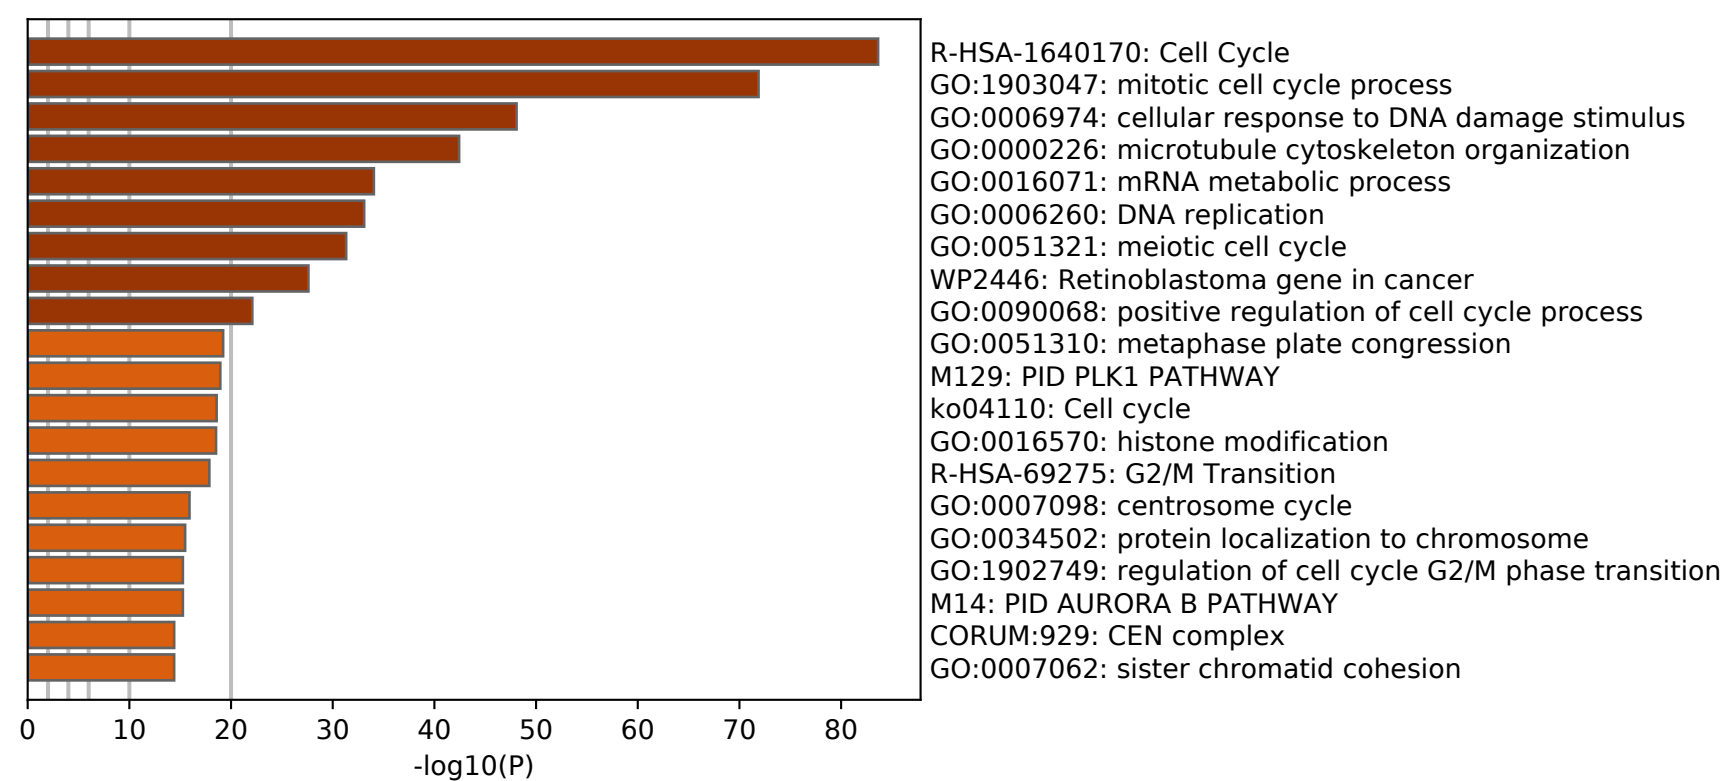

Supplement: table1-data1 [file elife-81290-table1-data1-v2.zip]

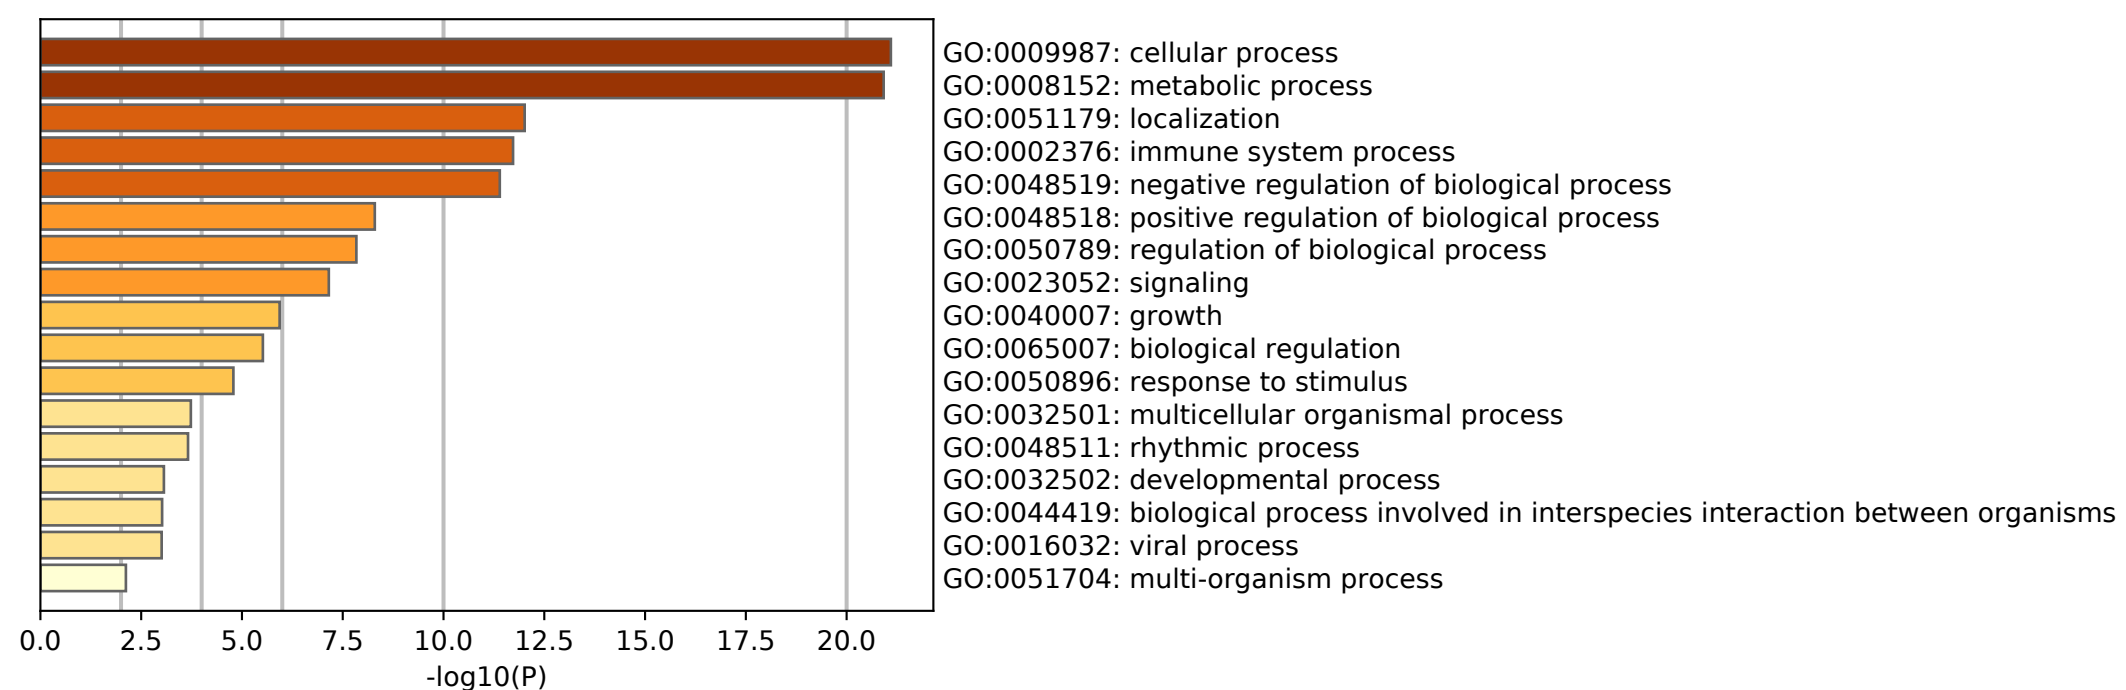

Supplement: table1-data1 [file elife-81290-table1-data1-v2.zip]

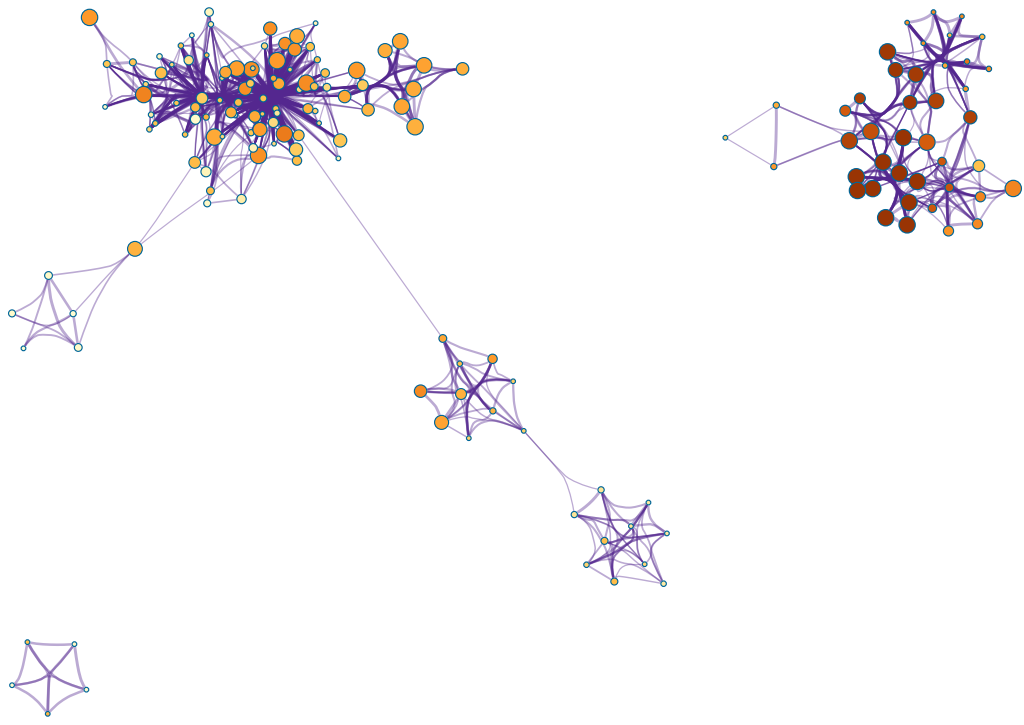



 created by  
<http://metascape.org>

Supplement: table1-data1 [file elife-81290-table1-data1-v2.zip]

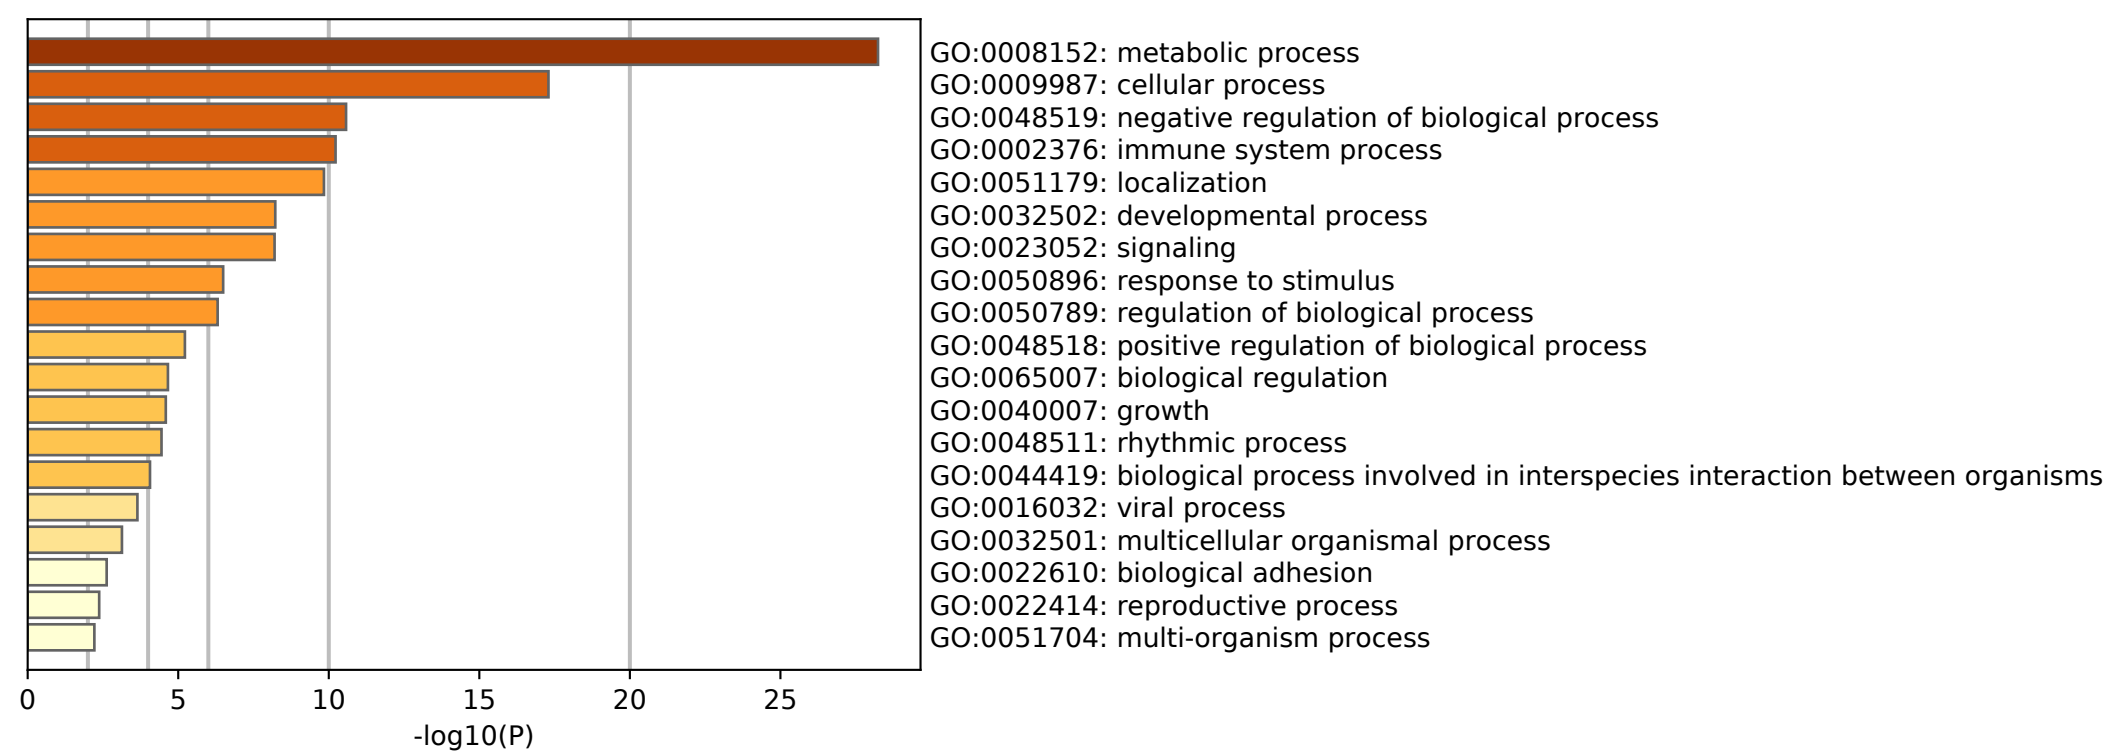

Supplement: table1-data1 [file elife-81290-table1-data1-v2.zip]

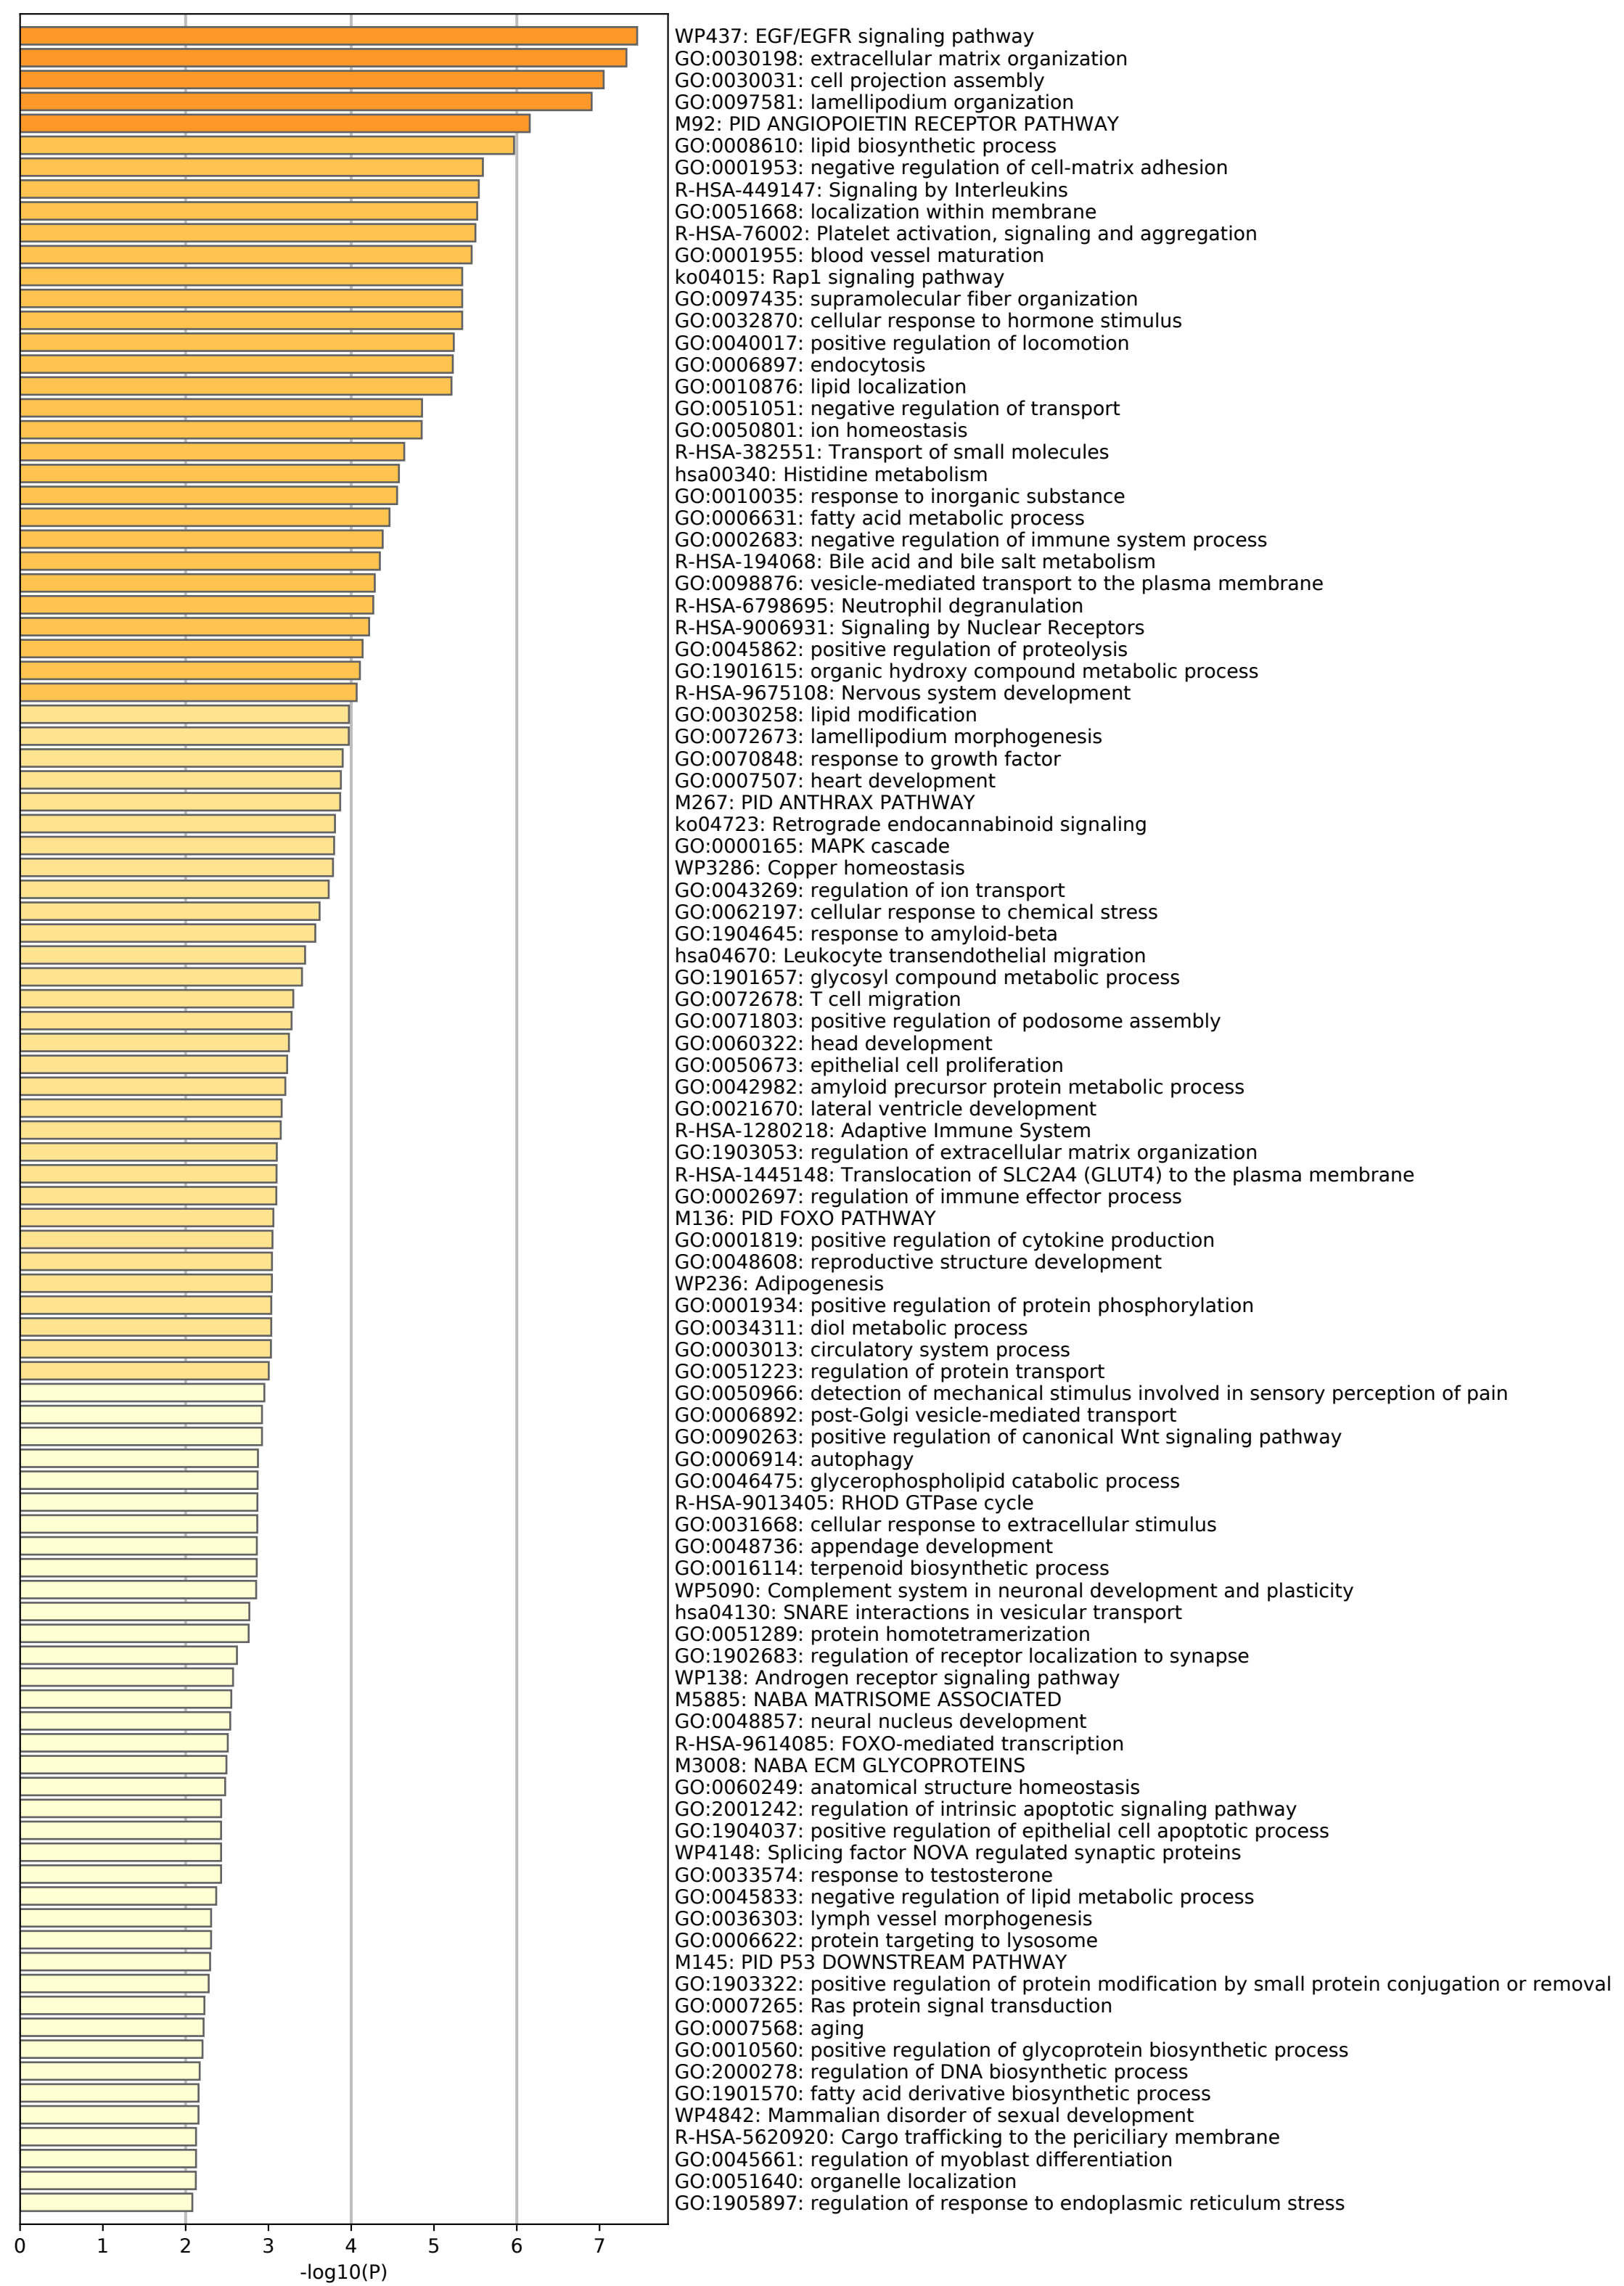

Supplement: table1-data1 [file elife-81290-table1-data1-v2.zip]

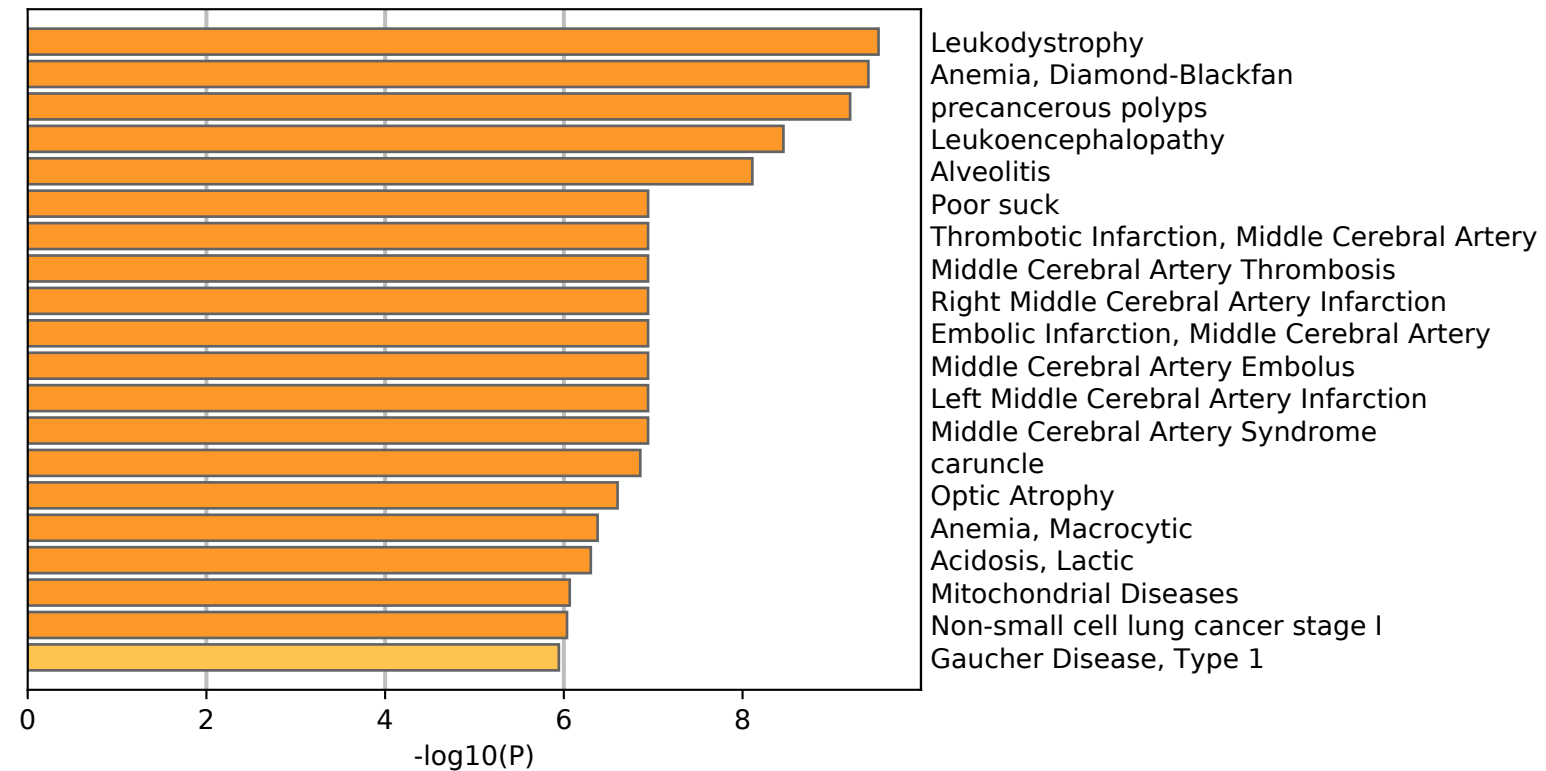

Supplement: table1-data1 [file elife-81290-table1-data1-v2.zip]

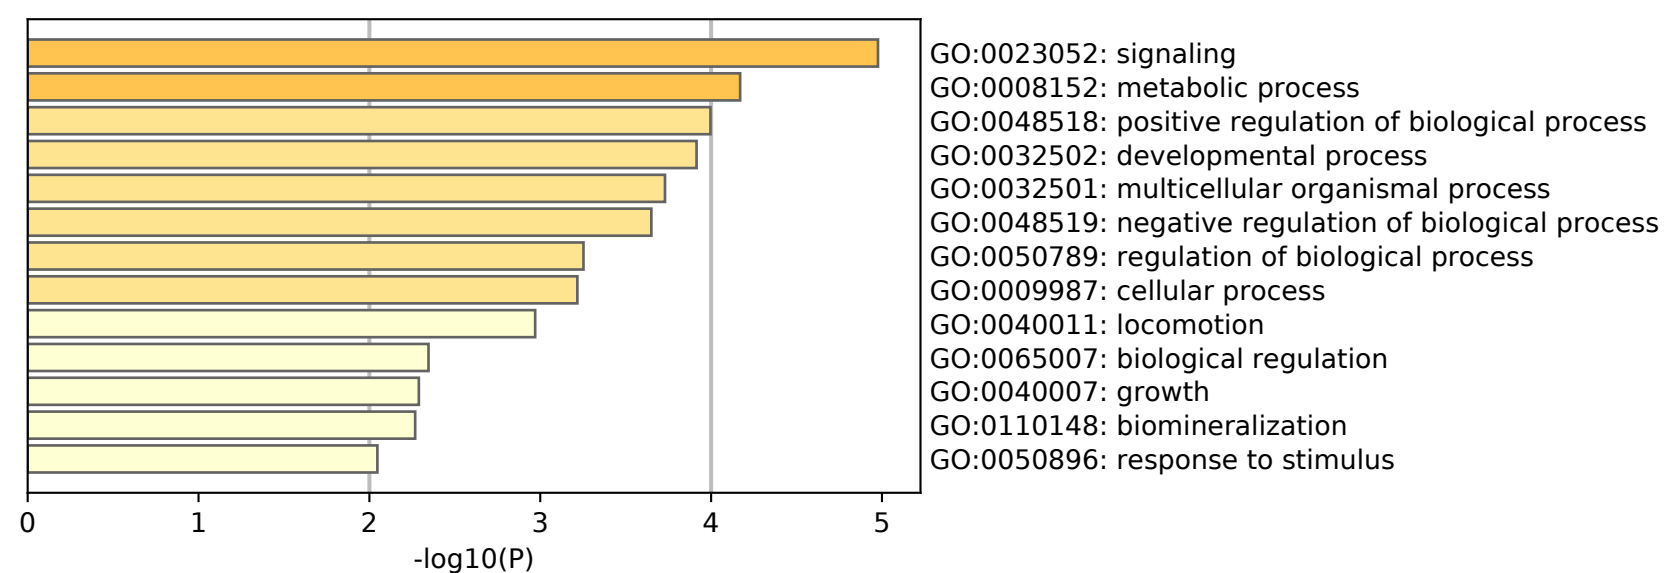

Supplement: table1-data1 [file elife-81290-table1-data1-v2.zip]

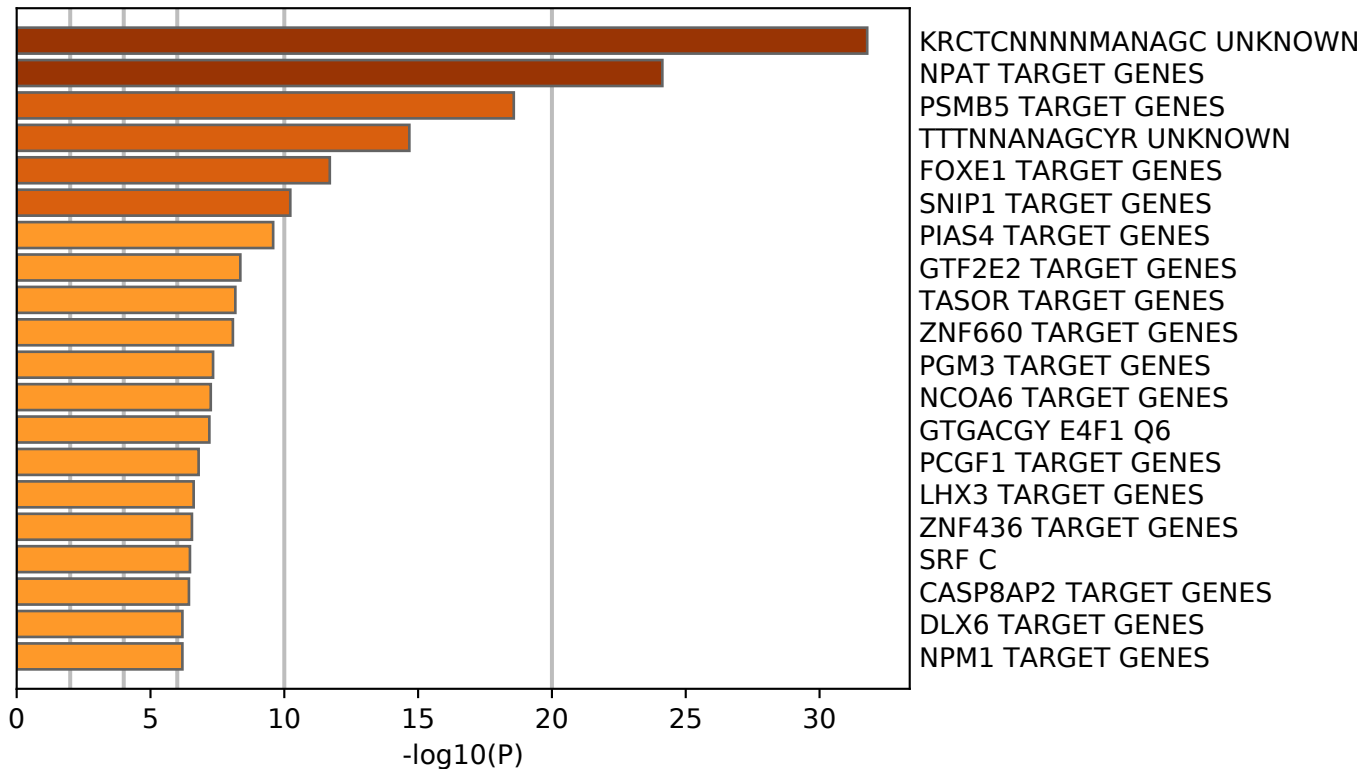

Supplement: table1-data1 [file elife-81290-table1-data1-v2.zip]

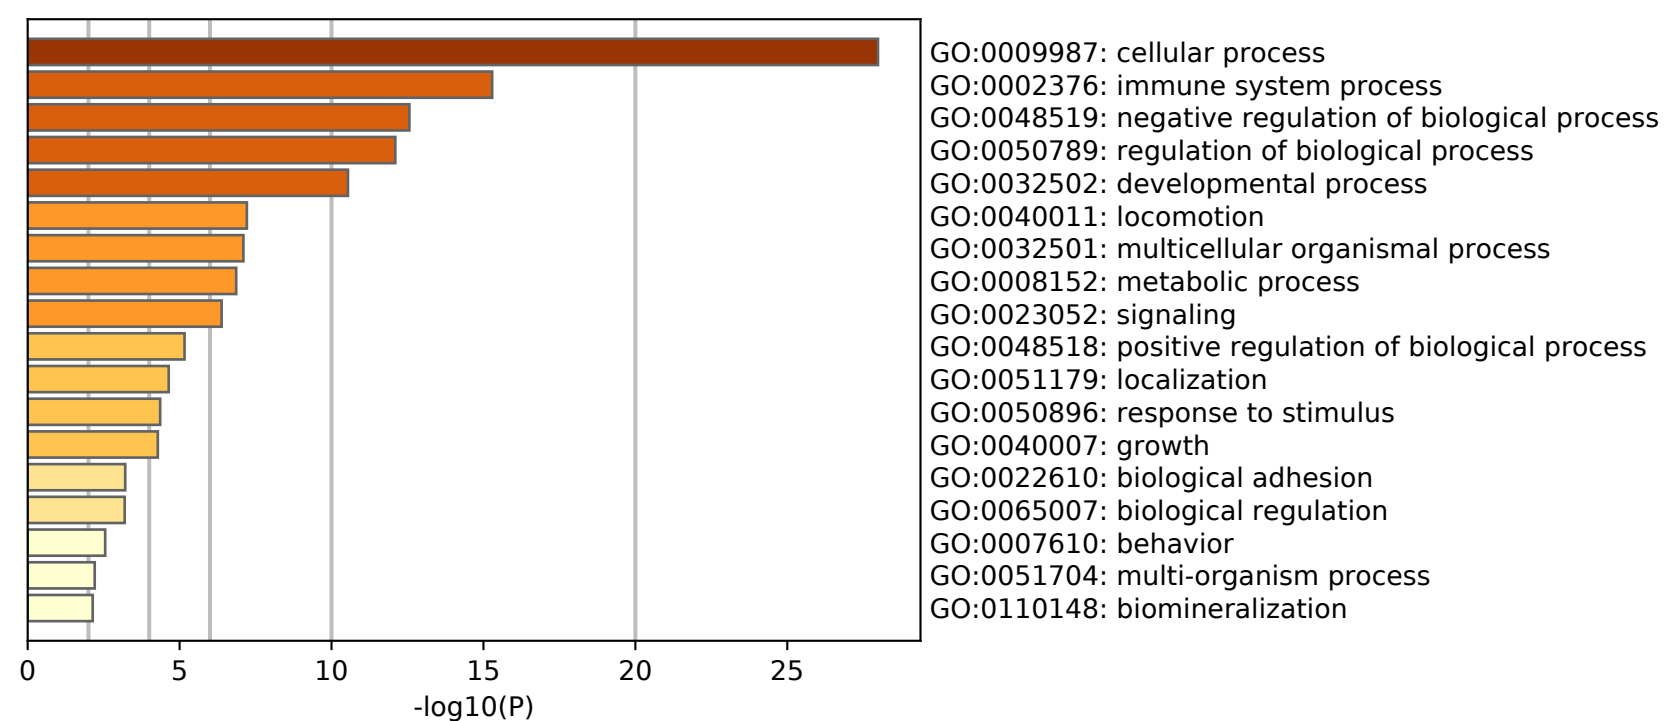

Supplement: table1-data1 [file elife-81290-table1-data1-v2.zip]

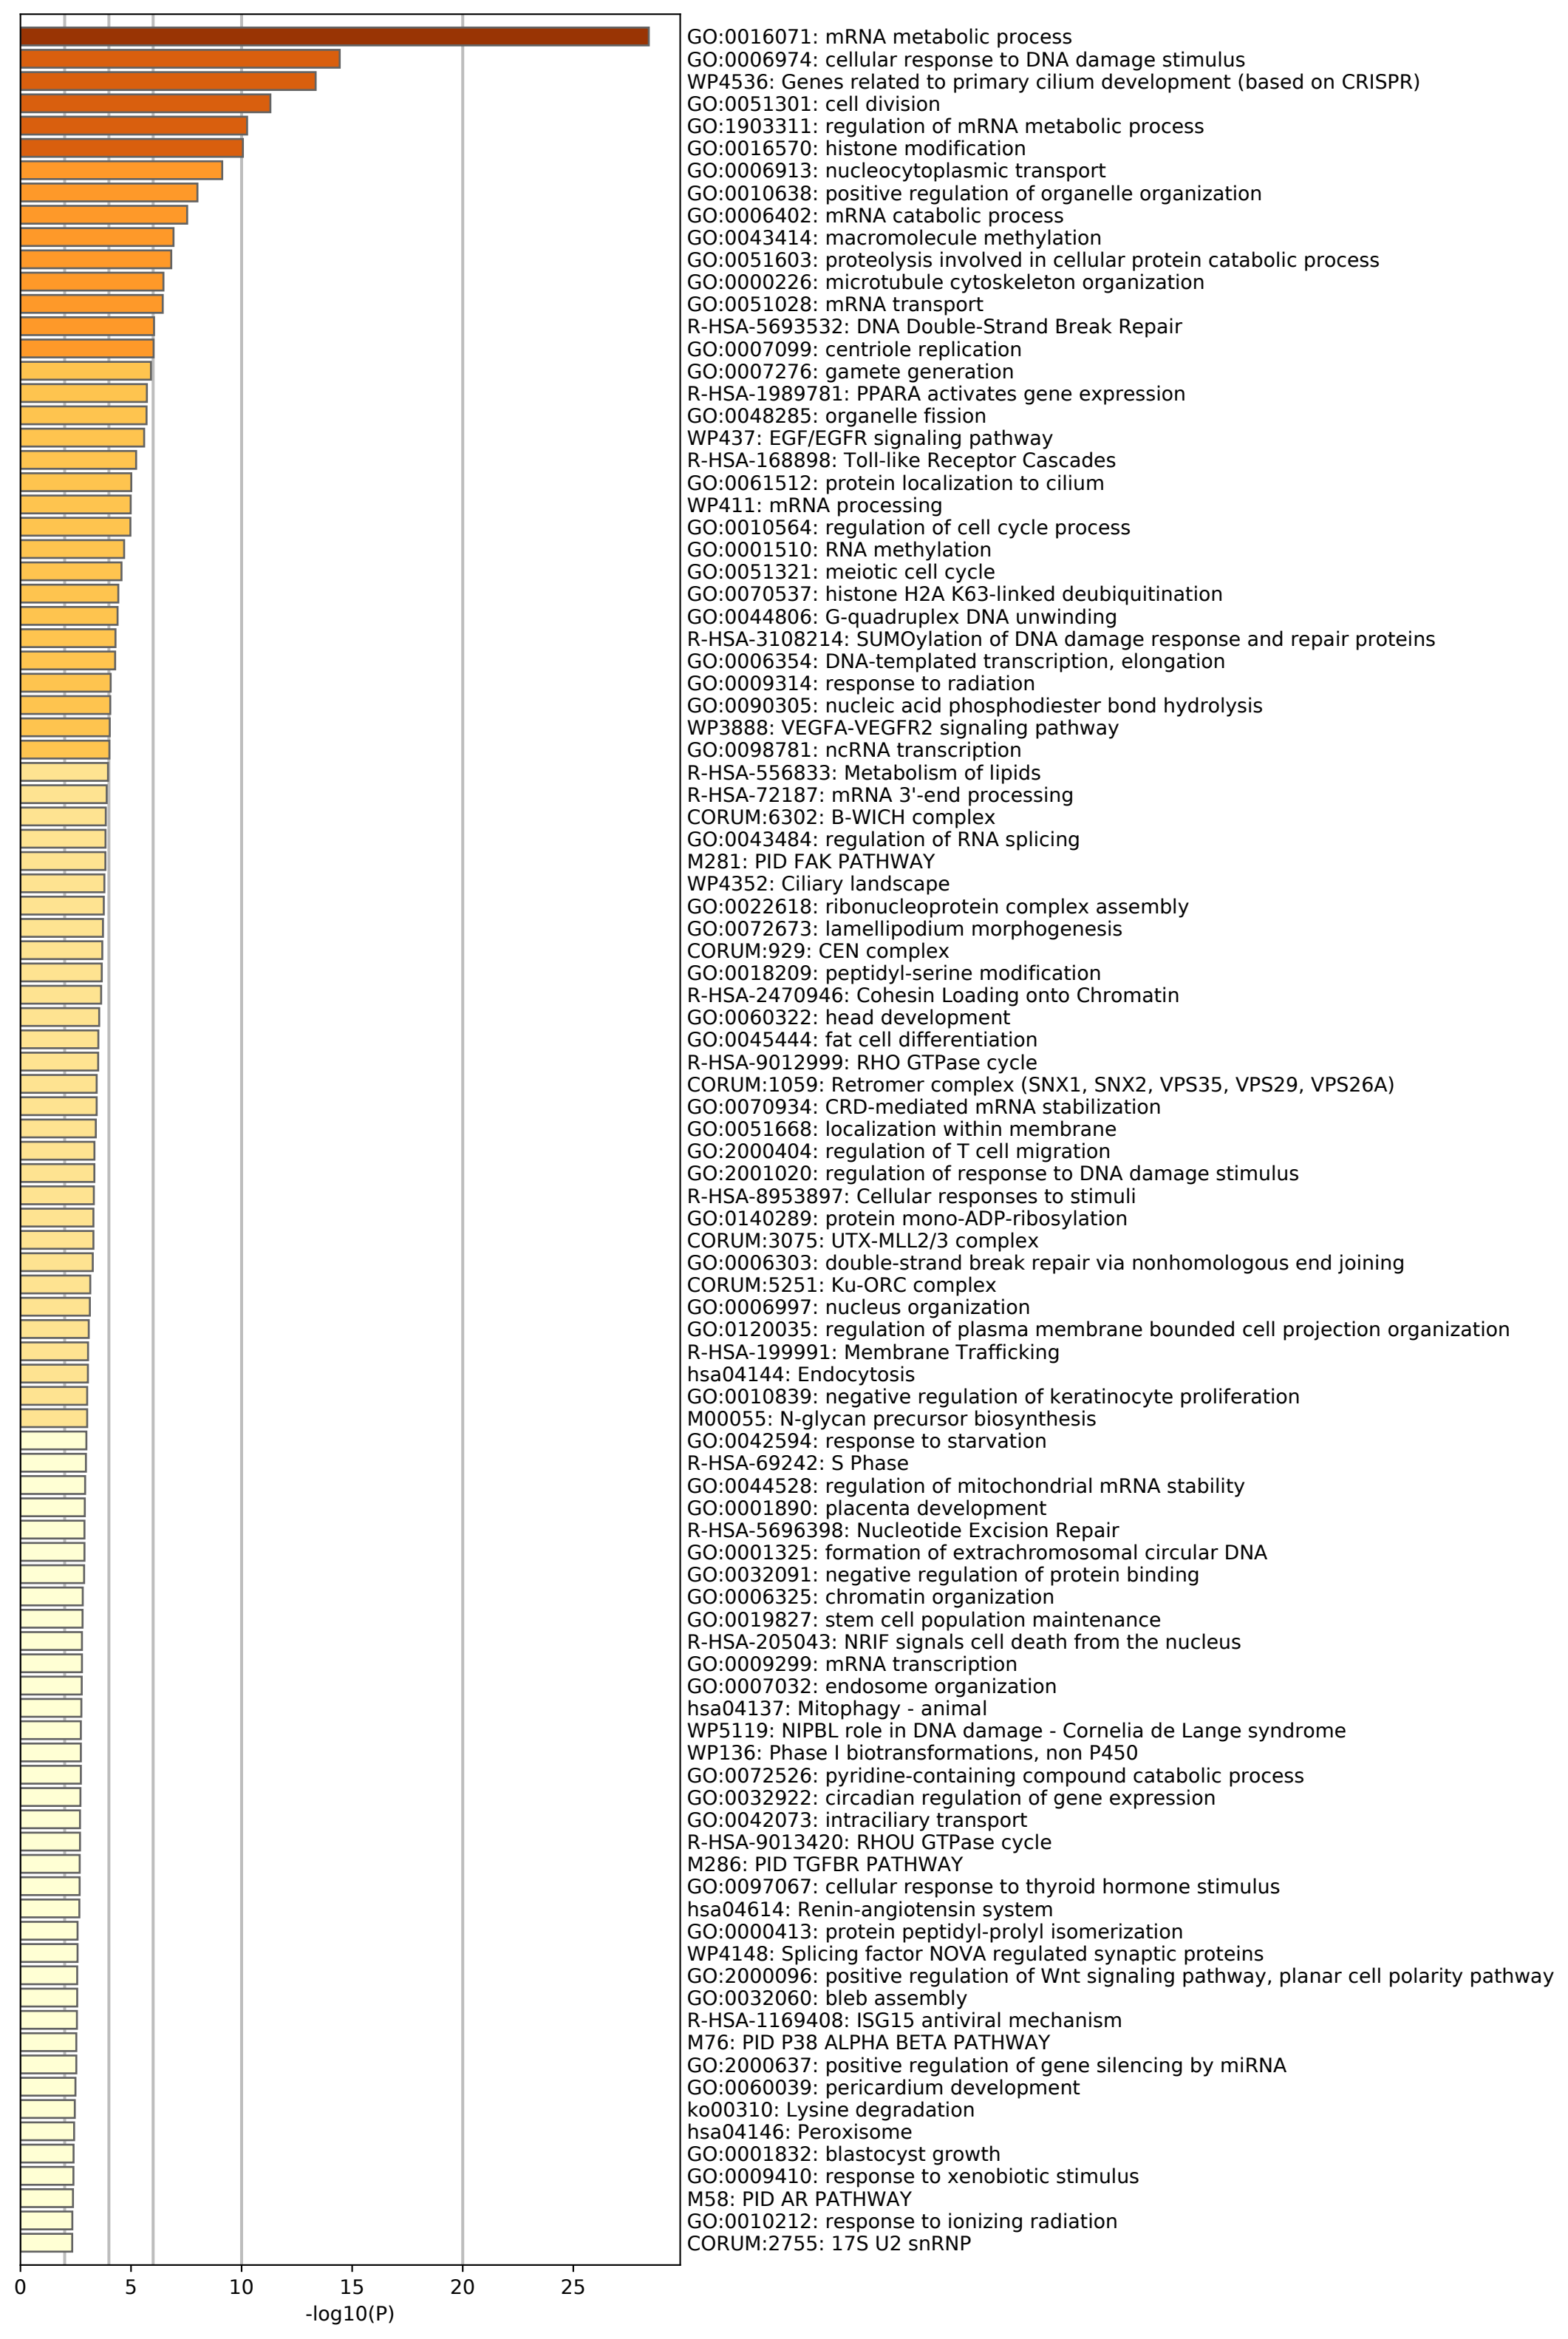

Supplement: table1-data1 [file elife-81290-table1-data1-v2.zip]

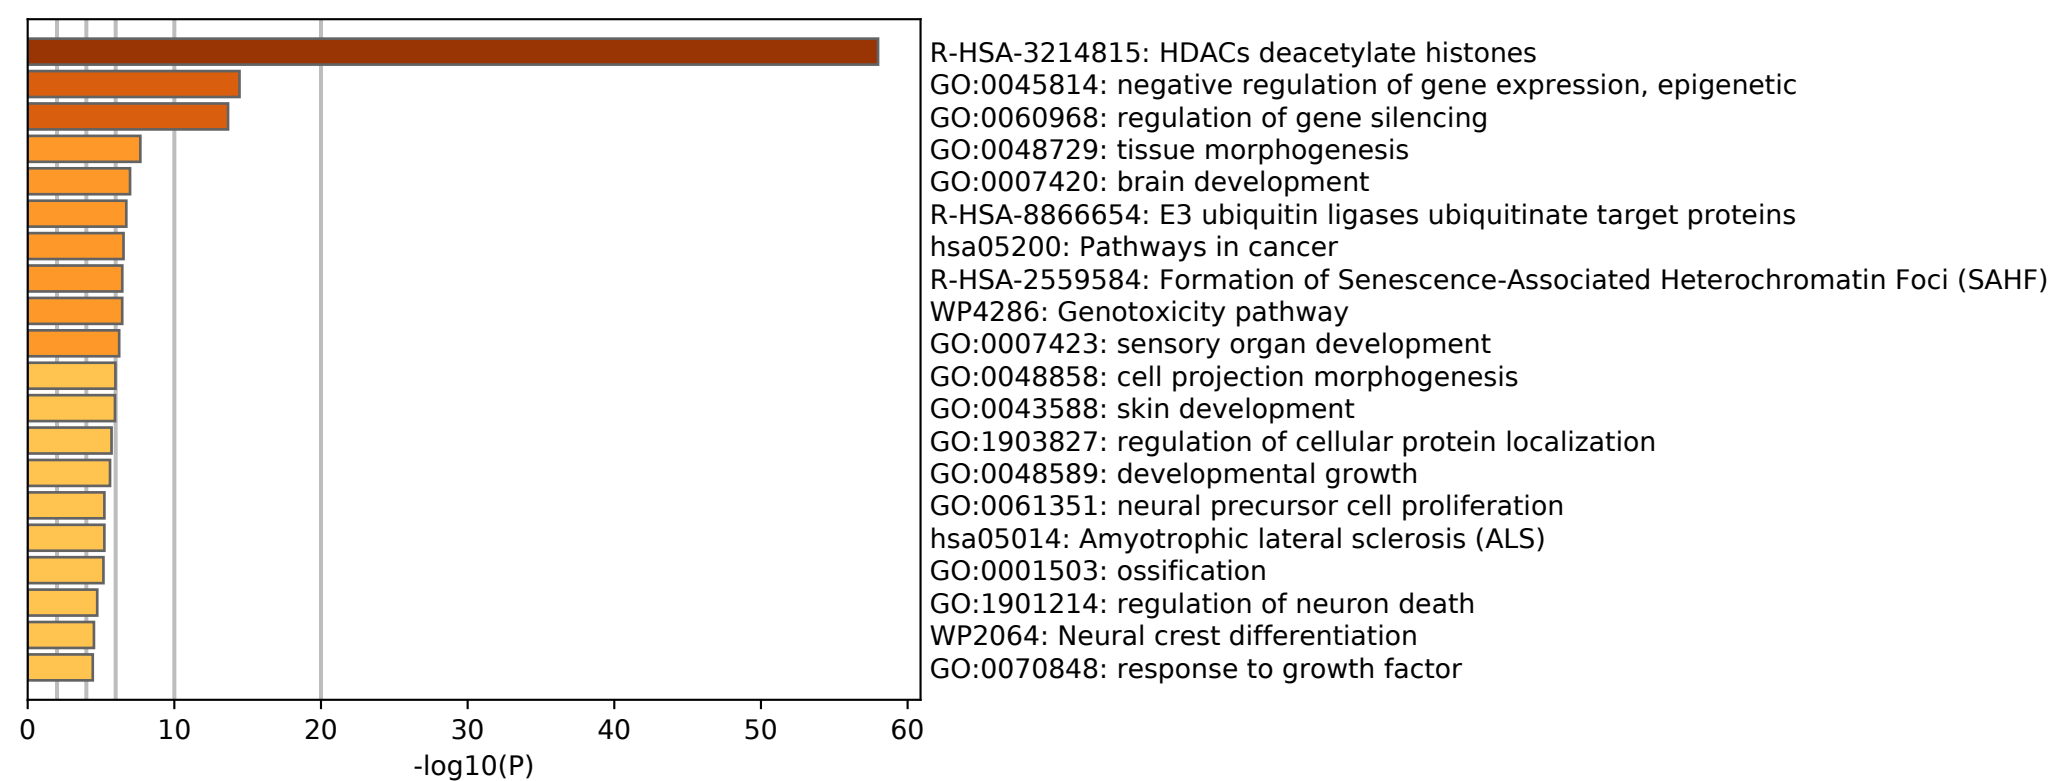

Supplement: table1-data1 [file elife-81290-table1-data1-v2.zip]

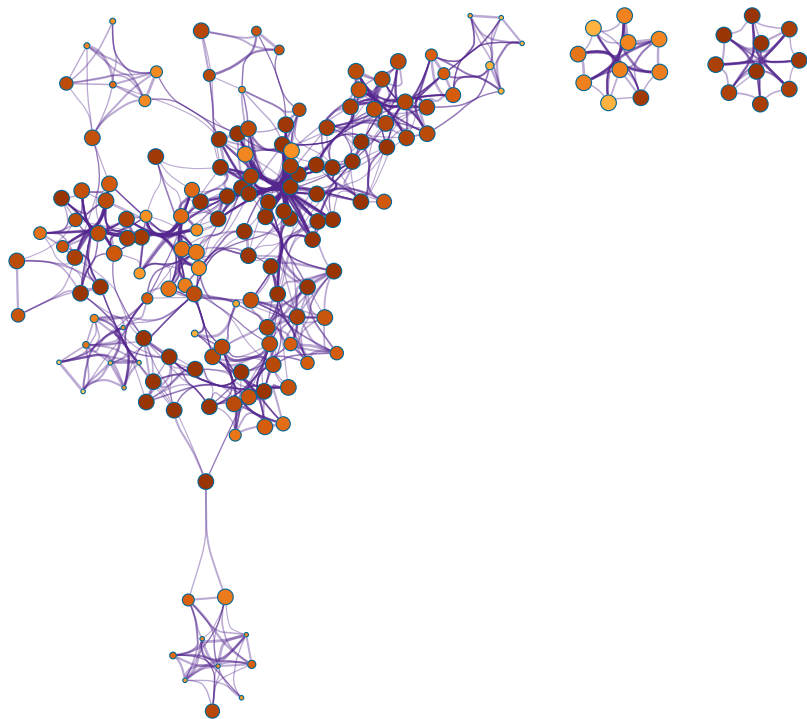



 created by  
<http://metascape.org>

Supplement: table1-data1 [file elife-81290-table1-data1-v2.zip]

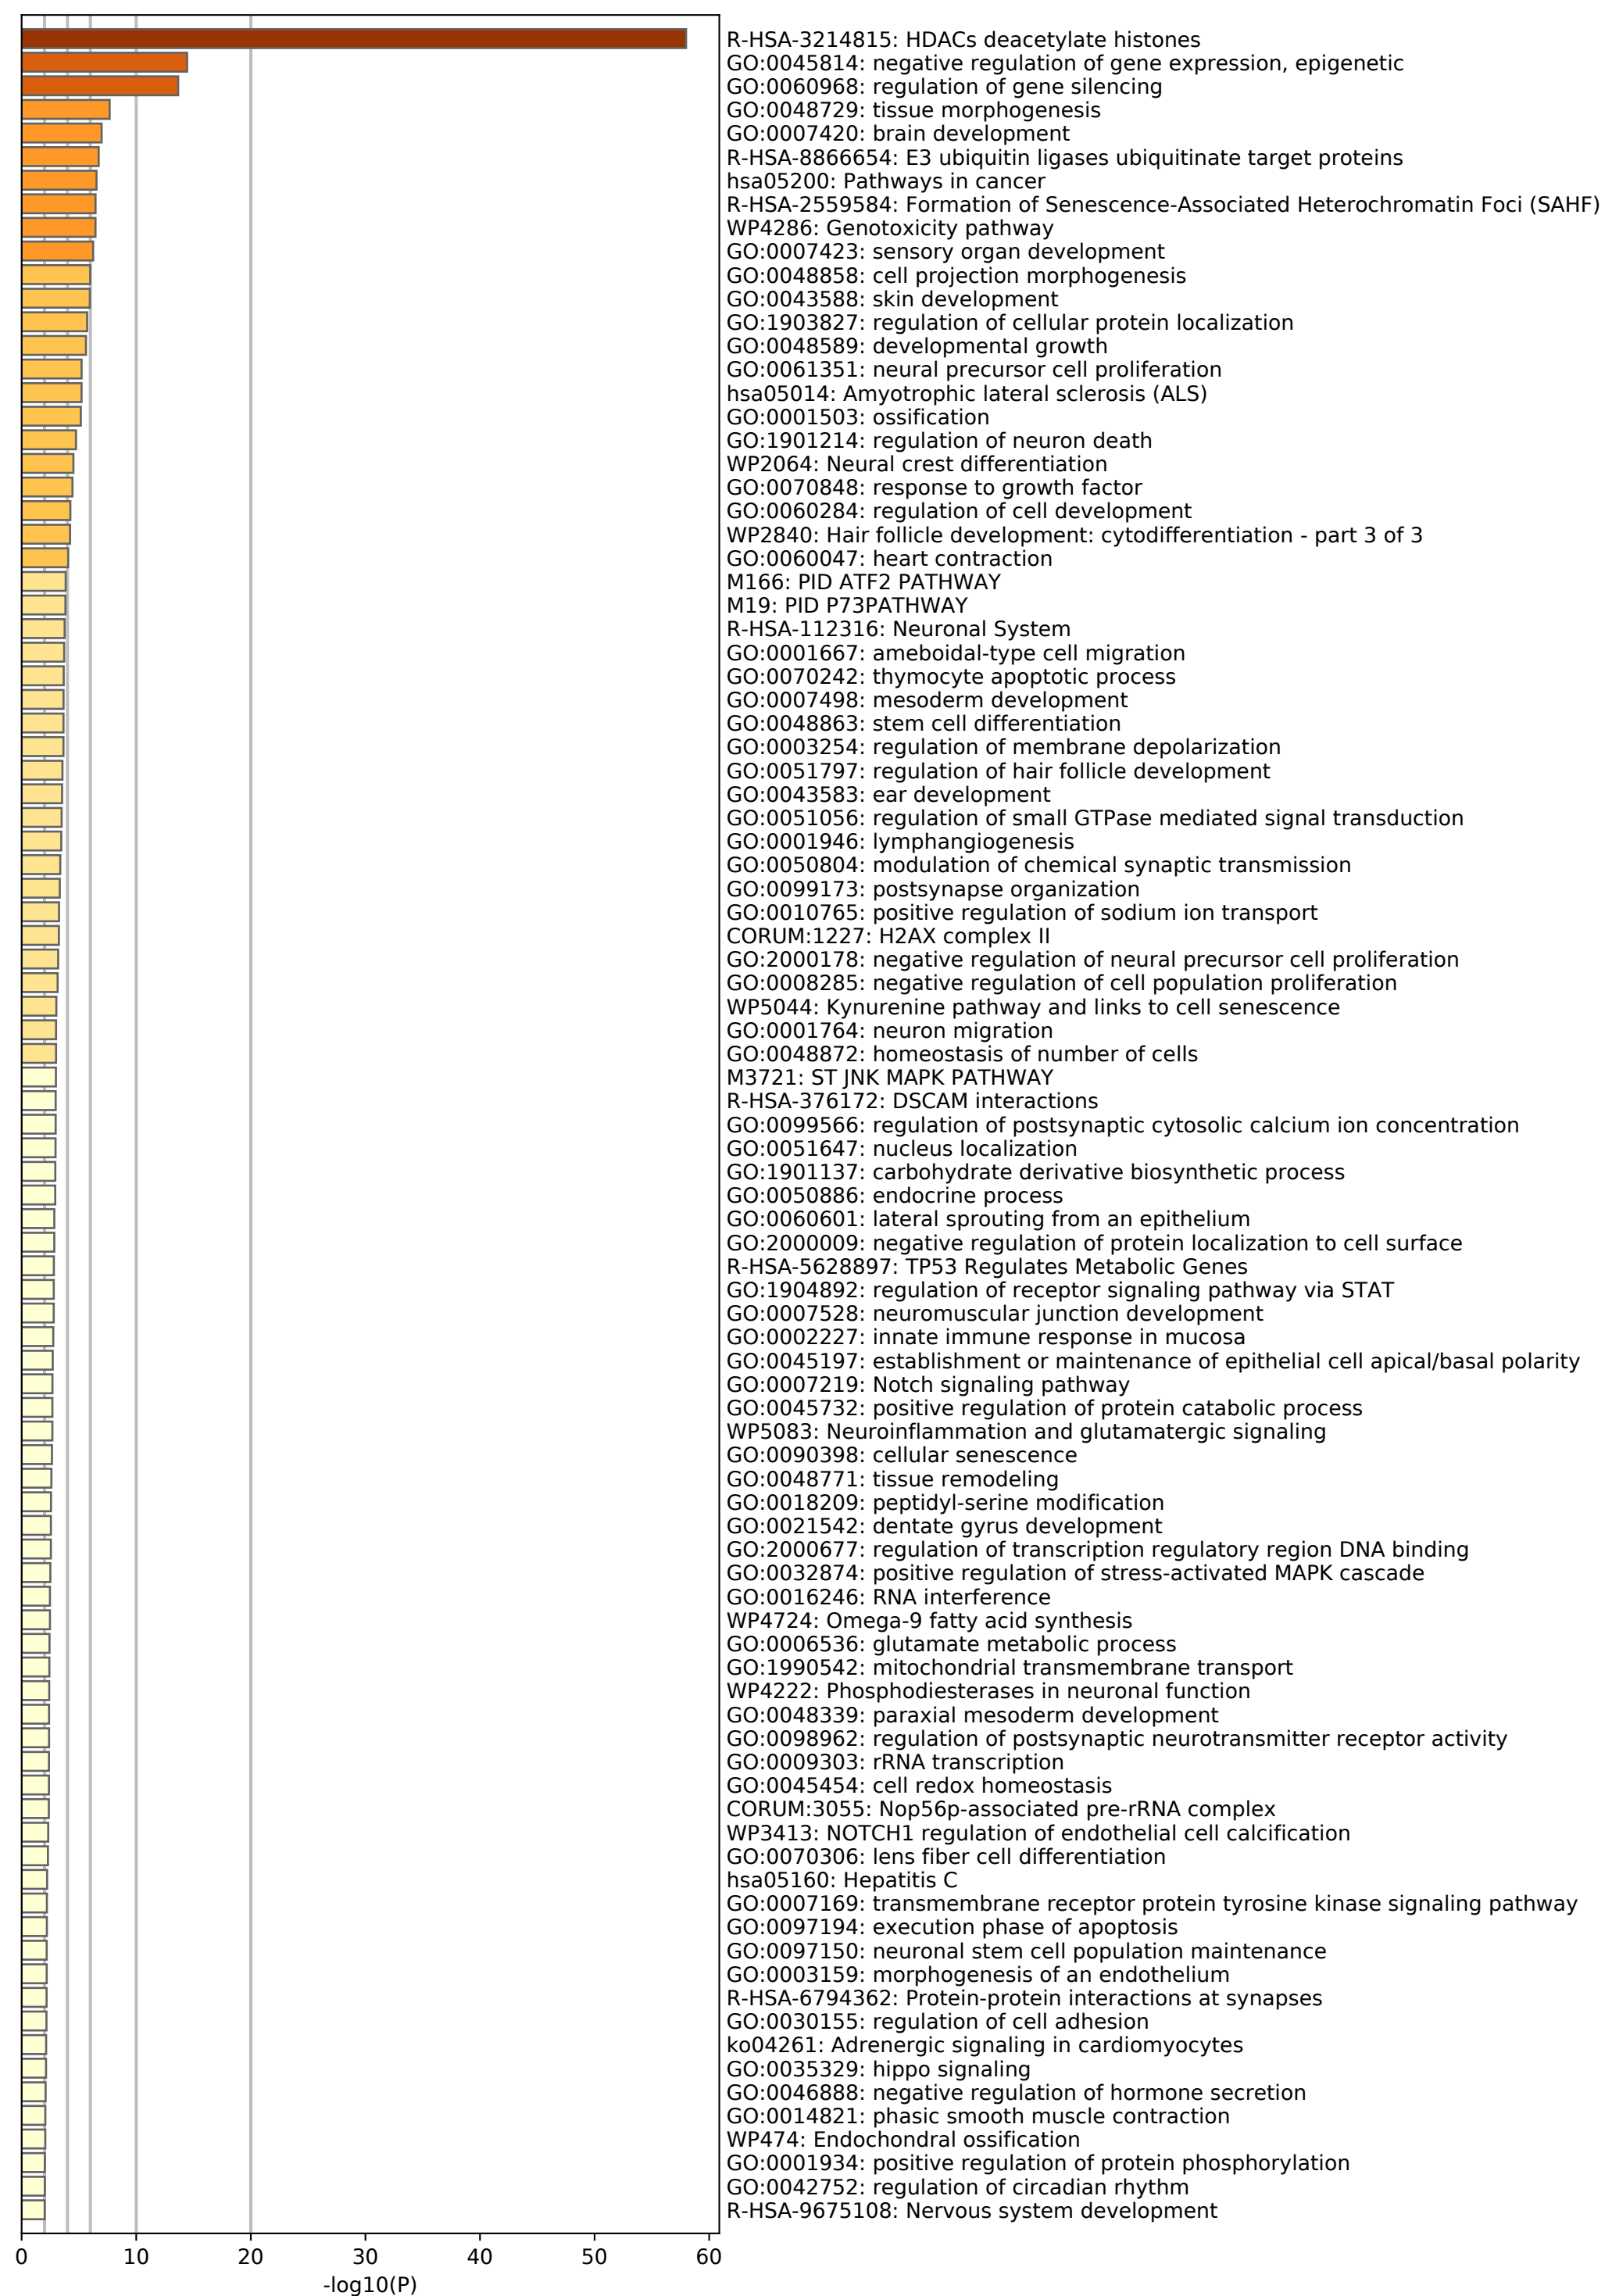

Supplement: table1-data1 [file elife-81290-table1-data1-v2.zip]

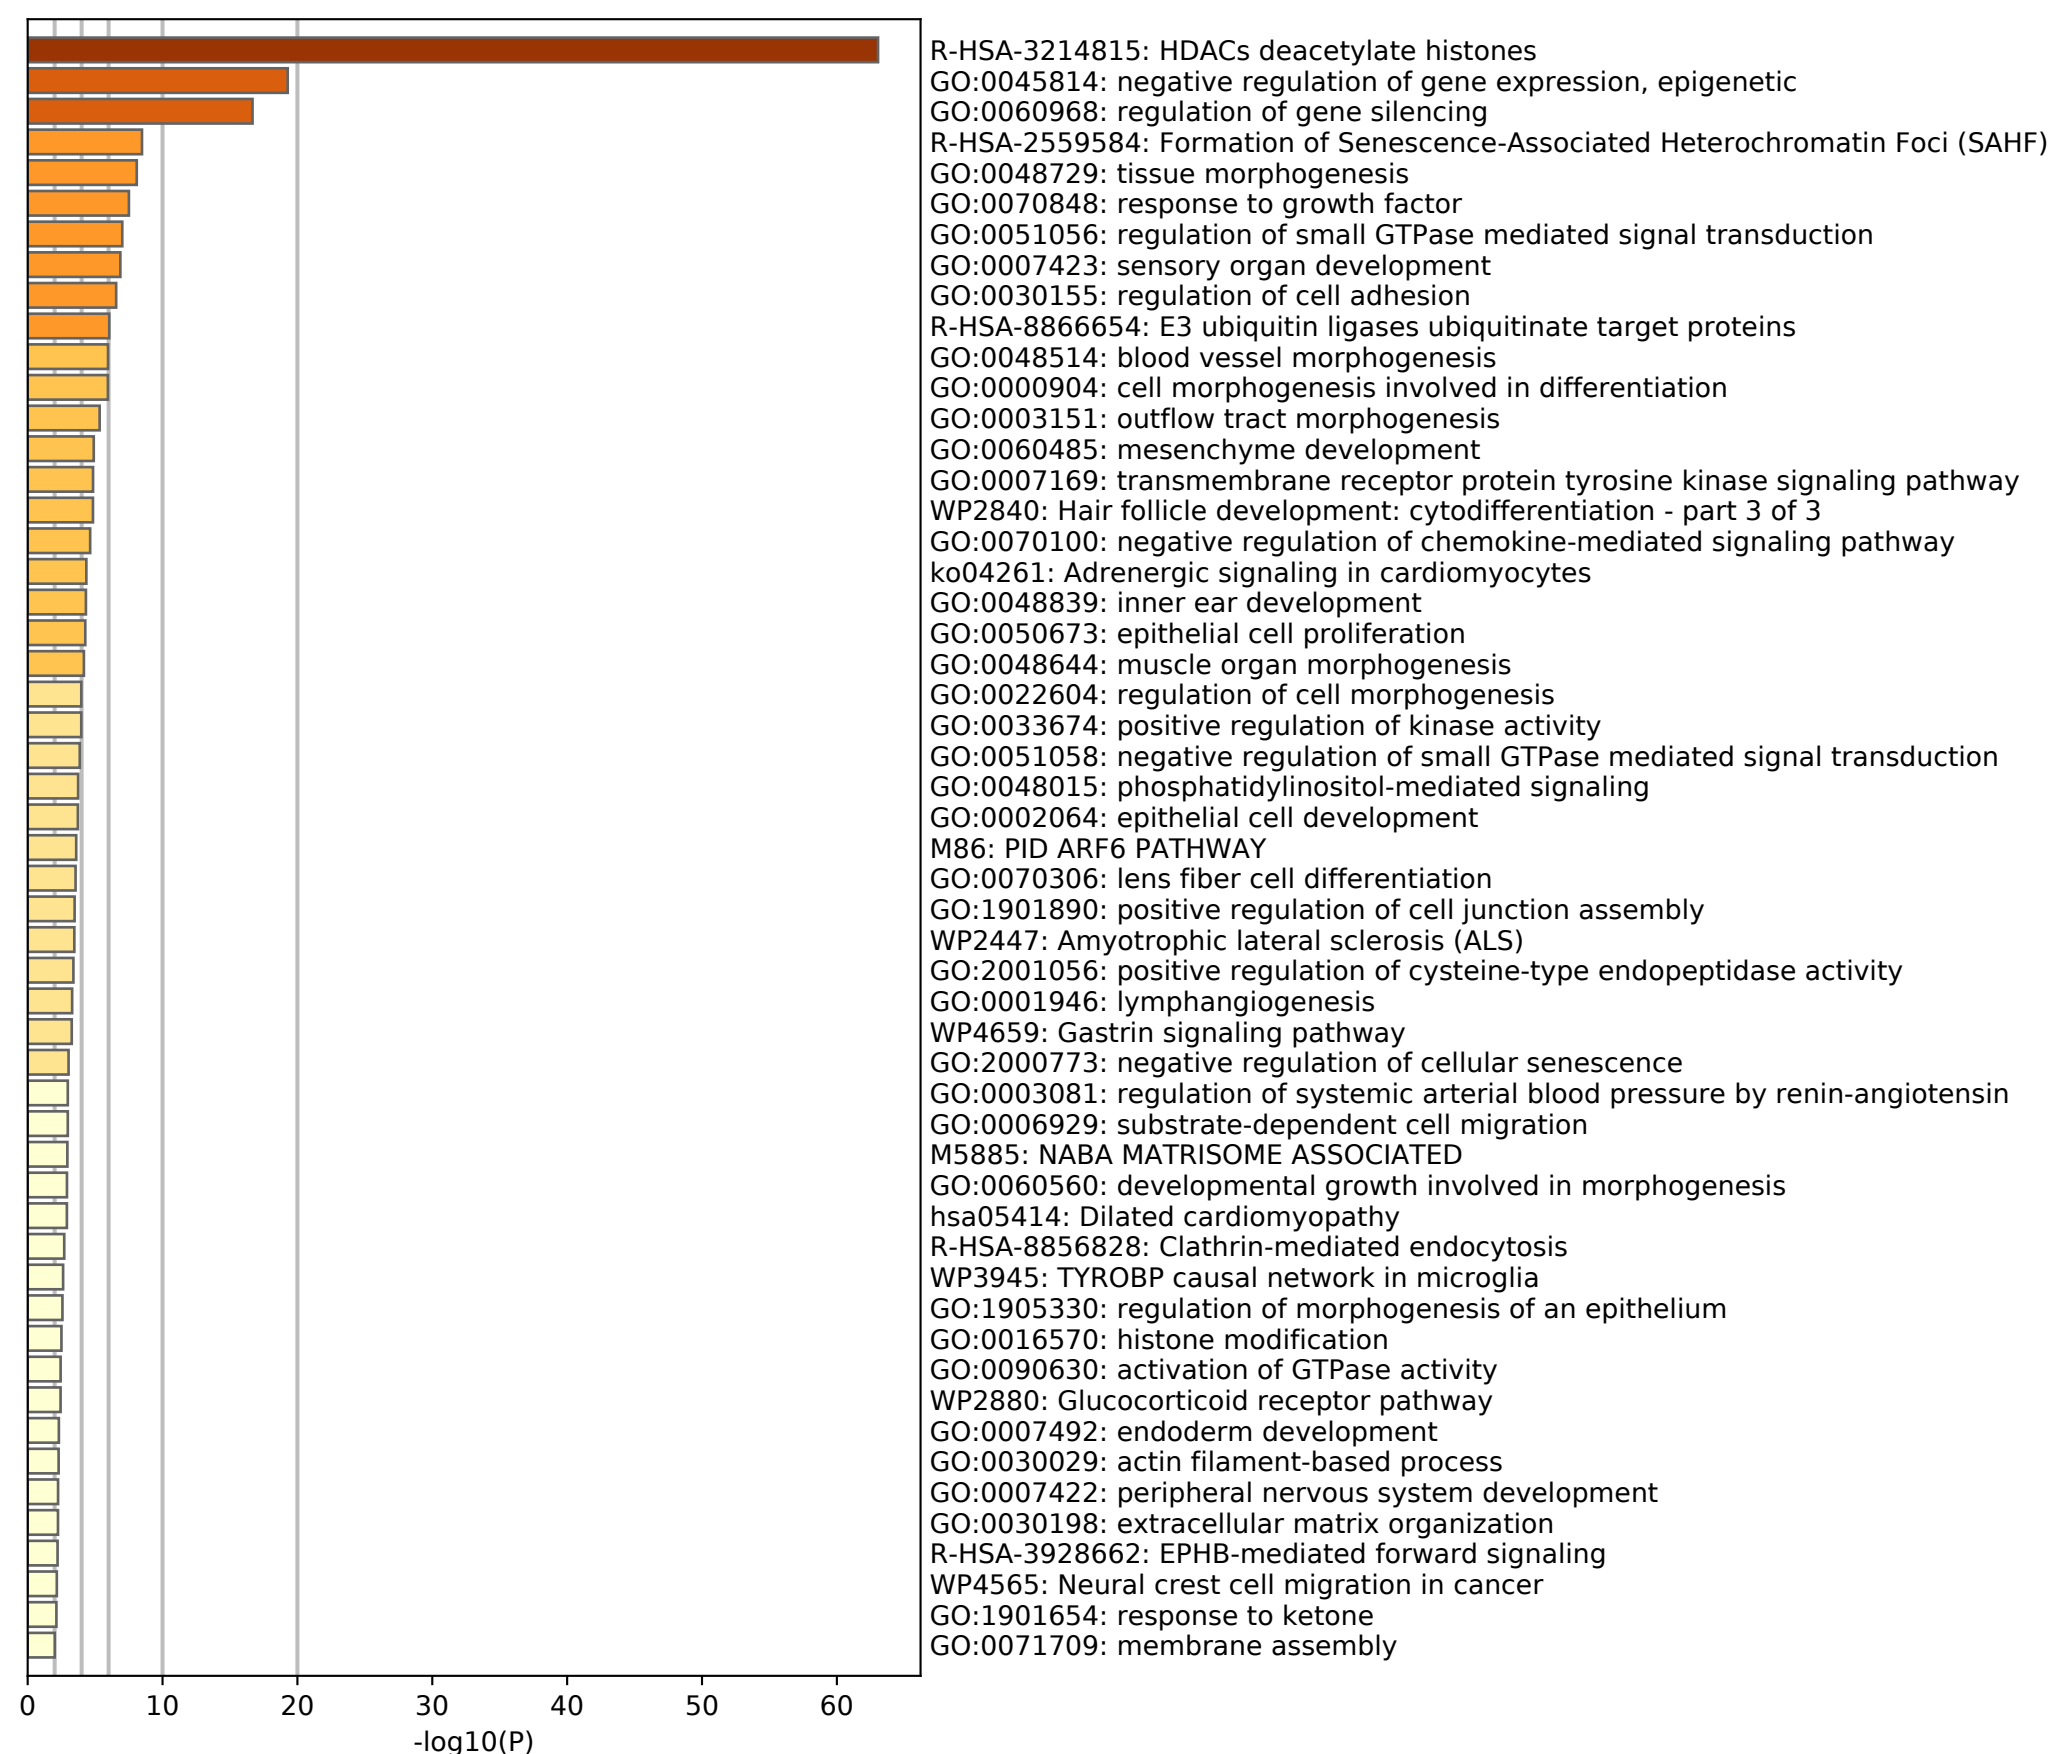

Supplement: table1-data1 [file elife-81290-table1-data1-v2.zip]

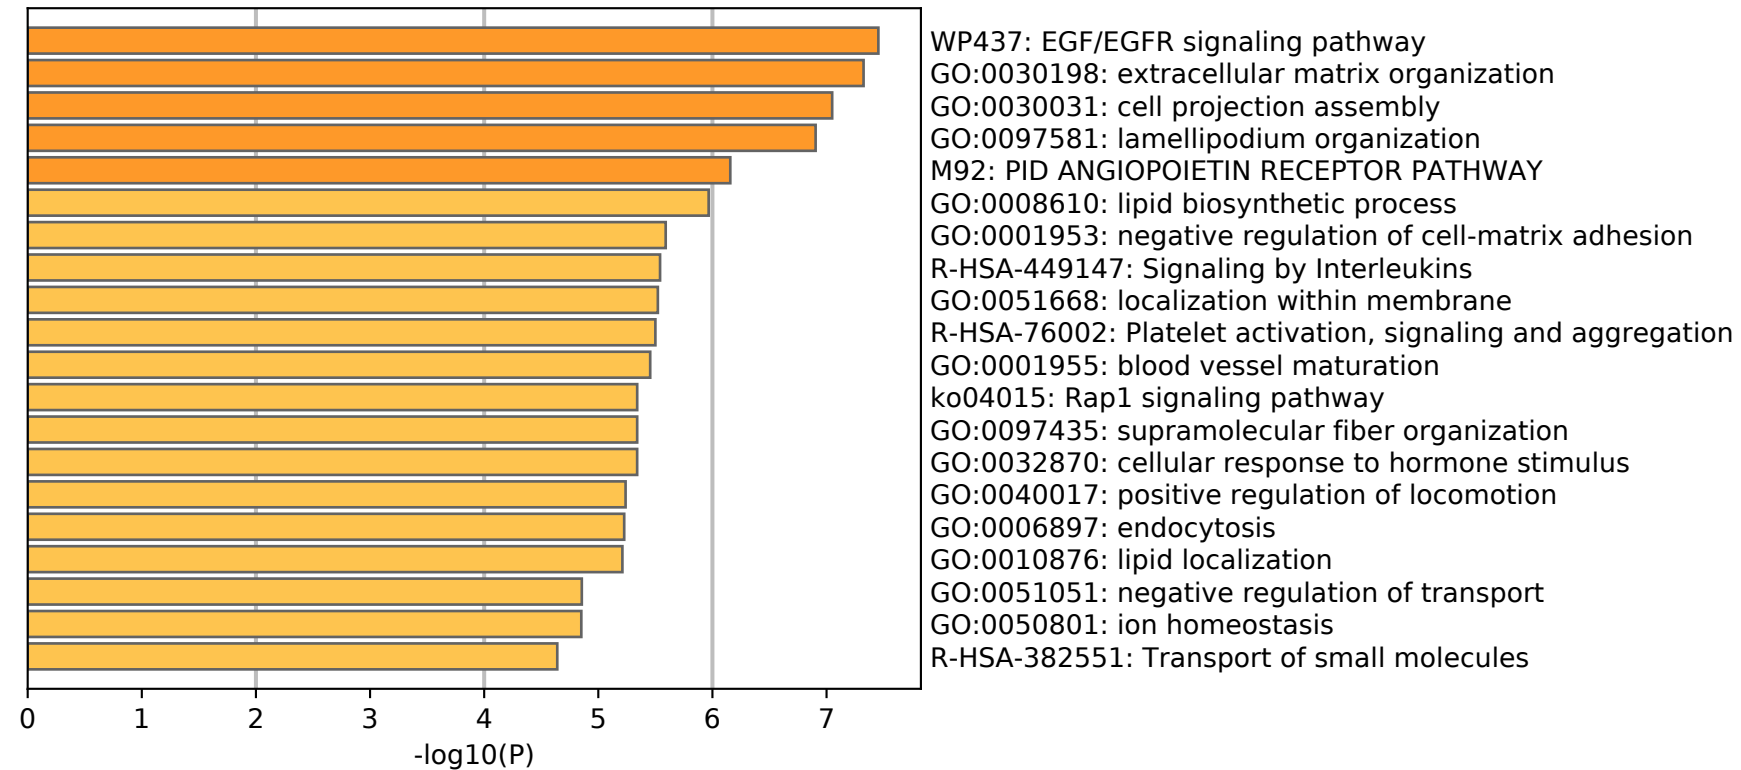

Supplement: table1-data1 [file elife-81290-table1-data1-v2.zip]

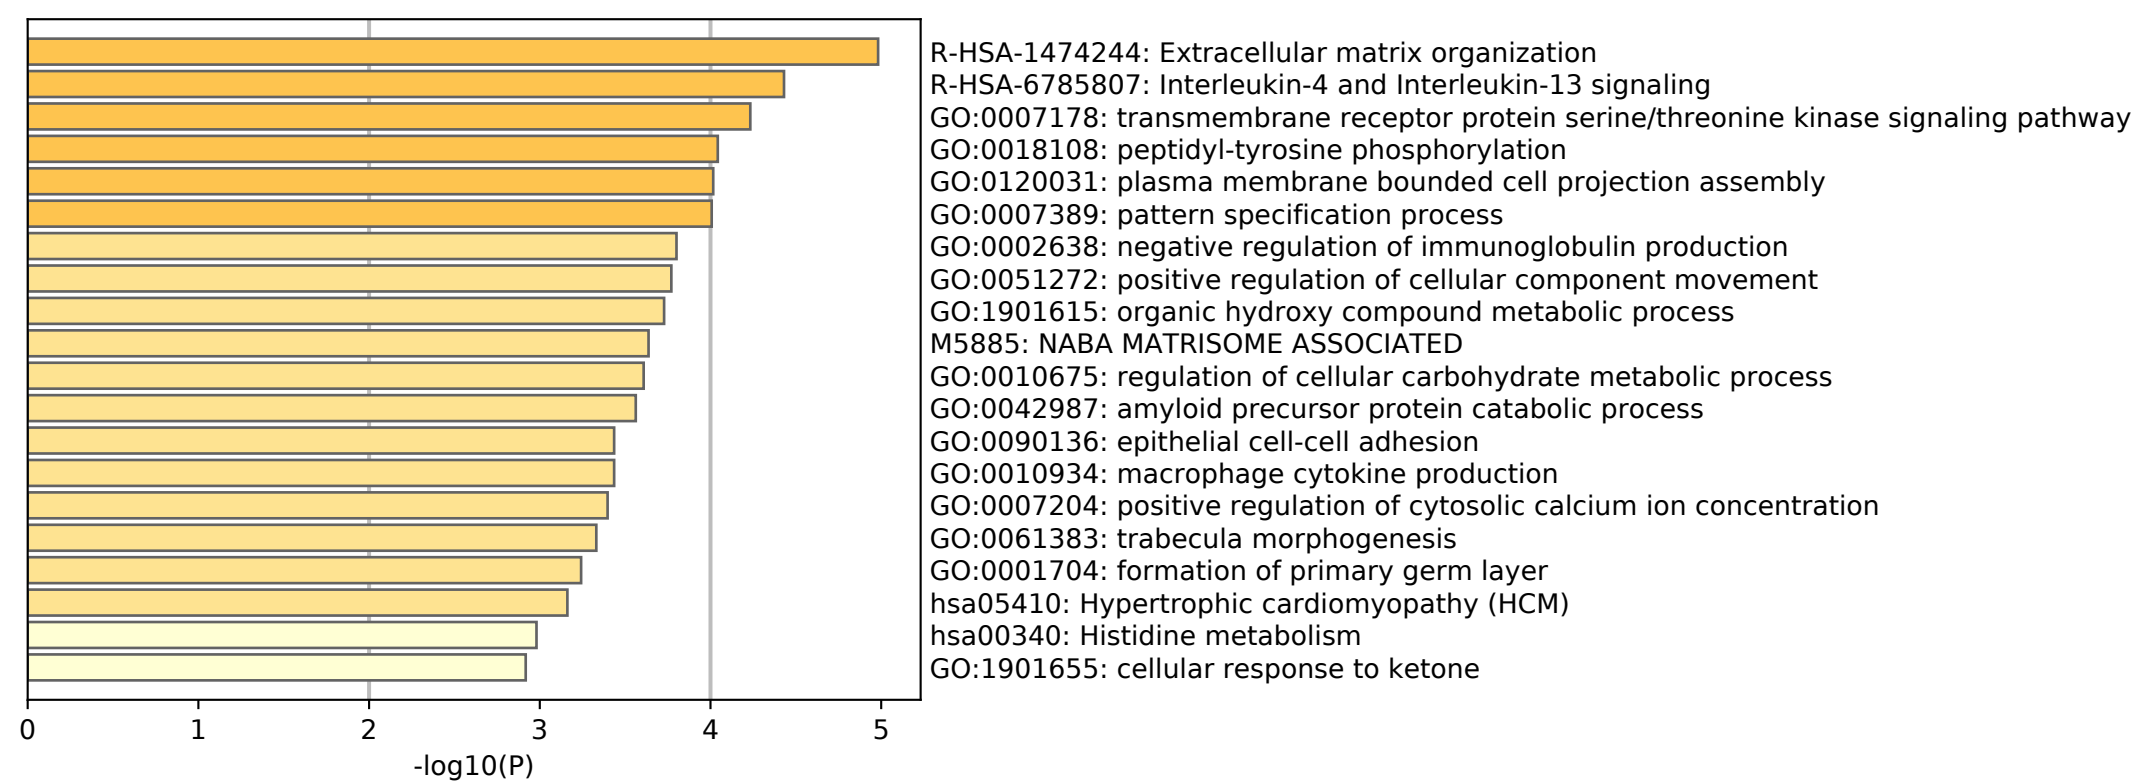

Supplement: table1-data1 [file elife-81290-table1-data1-v2.zip]

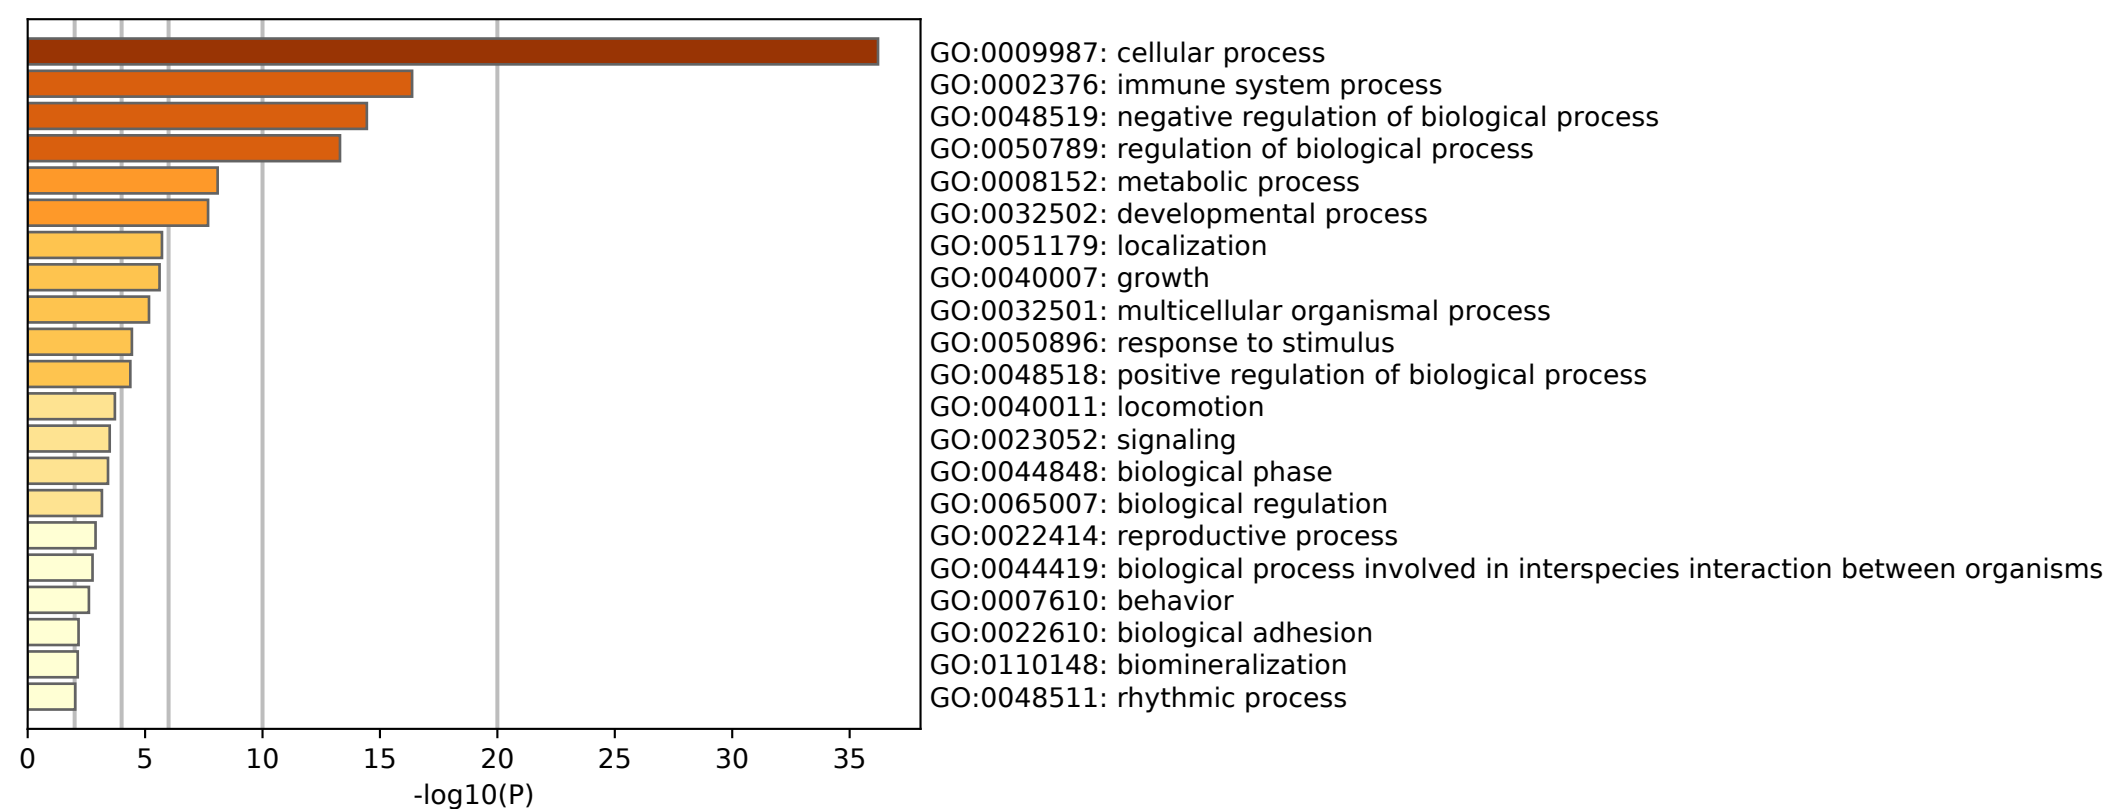

Supplement: table1-data1 [file elife-81290-table1-data1-v2.zip]

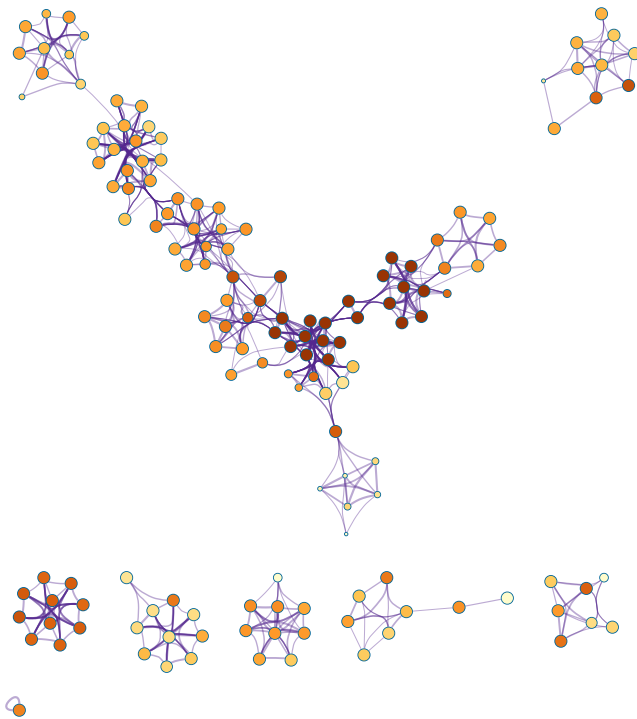



 created by  
<http://metascape.org>

Supplement: table1-data1 [file elife-81290-table1-data1-v2.zip]

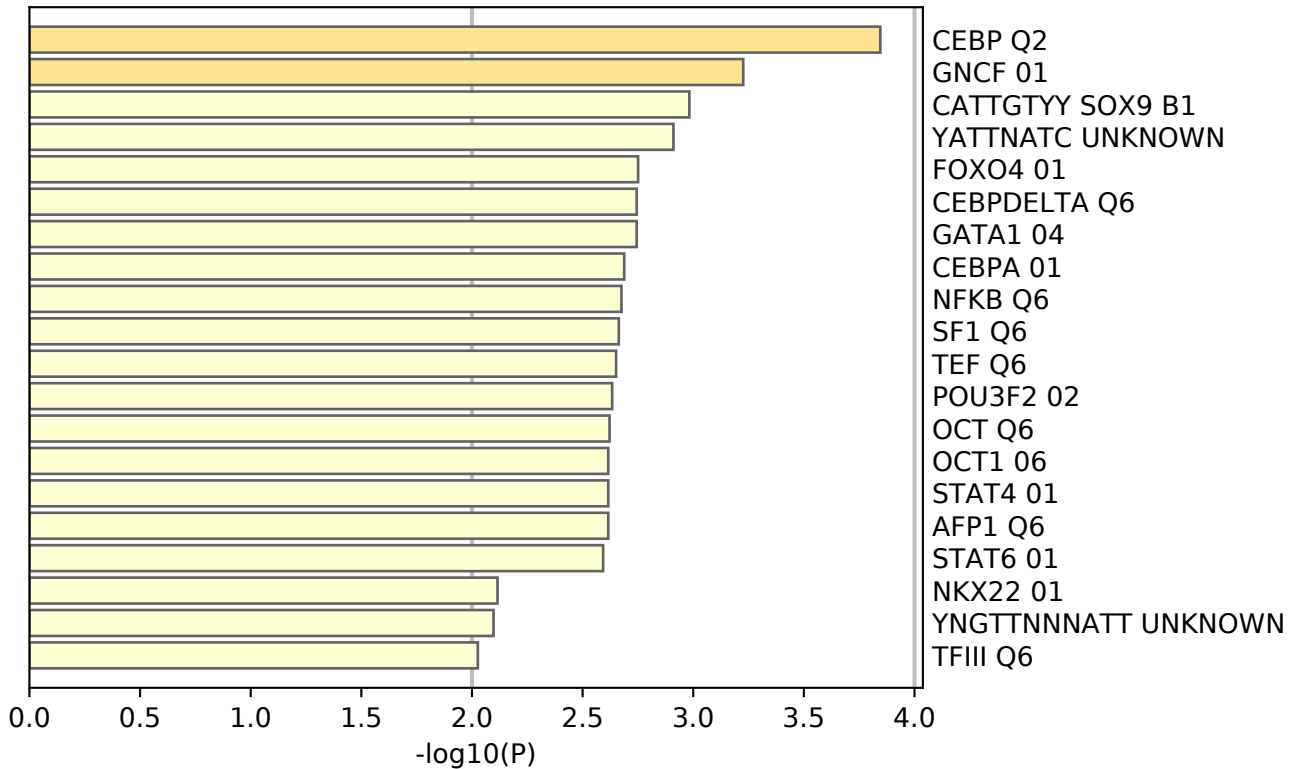

Supplement: table1-data1 [file elife-81290-table1-data1-v2.zip]

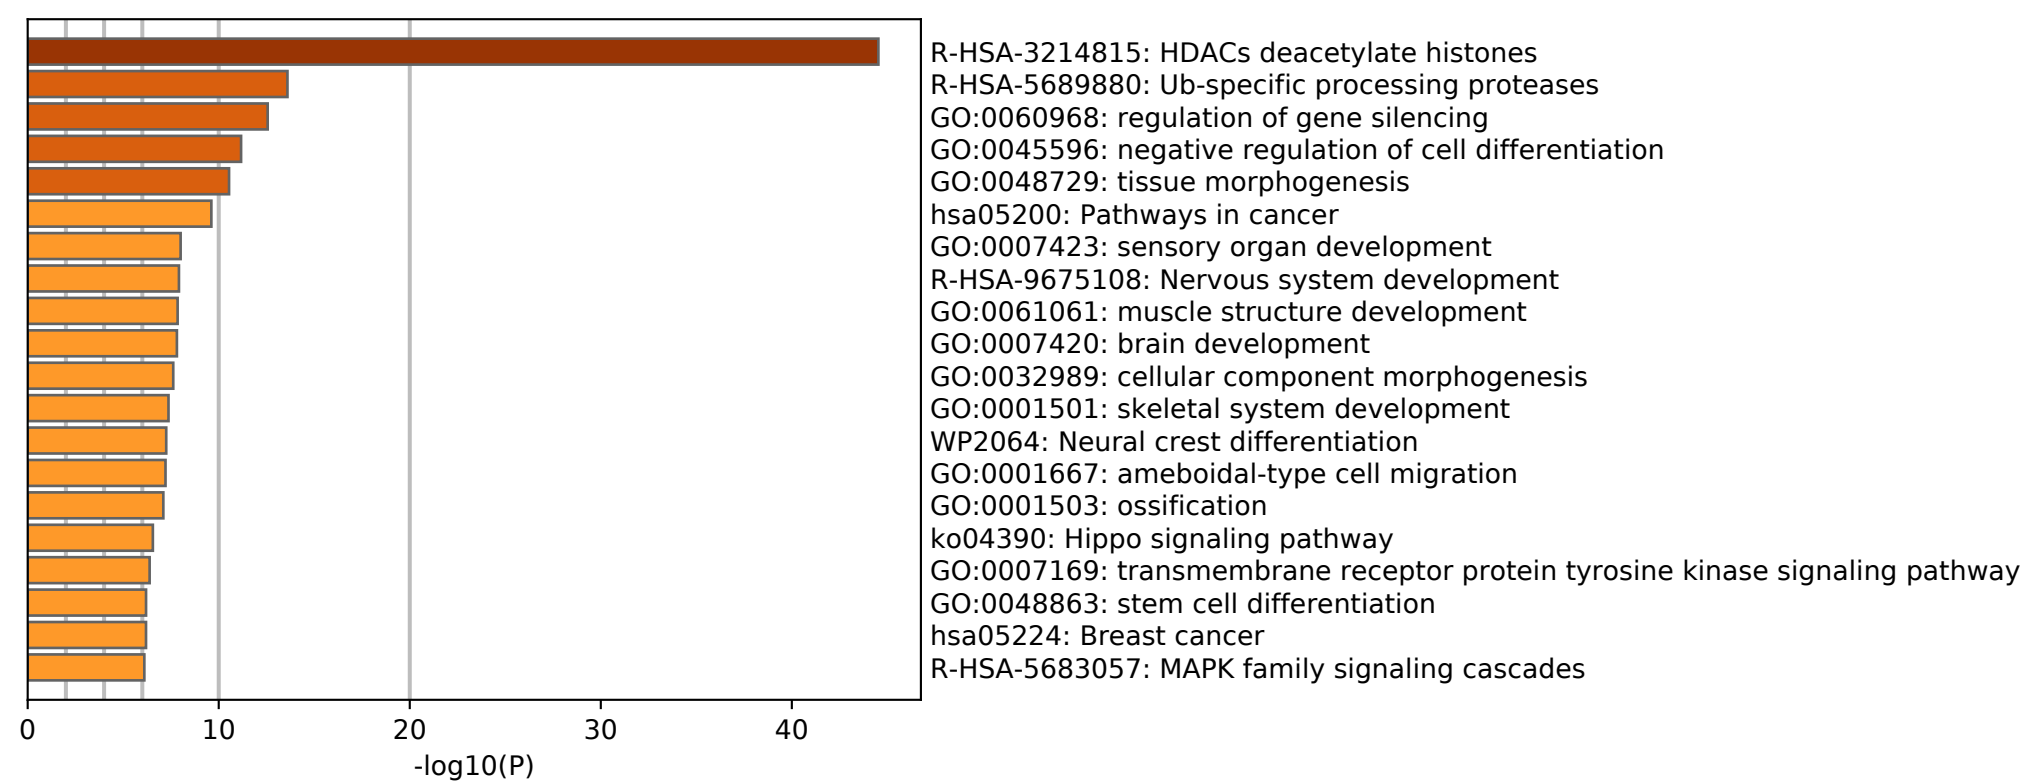

Supplement: table1-data1 [file elife-81290-table1-data1-v2.zip]

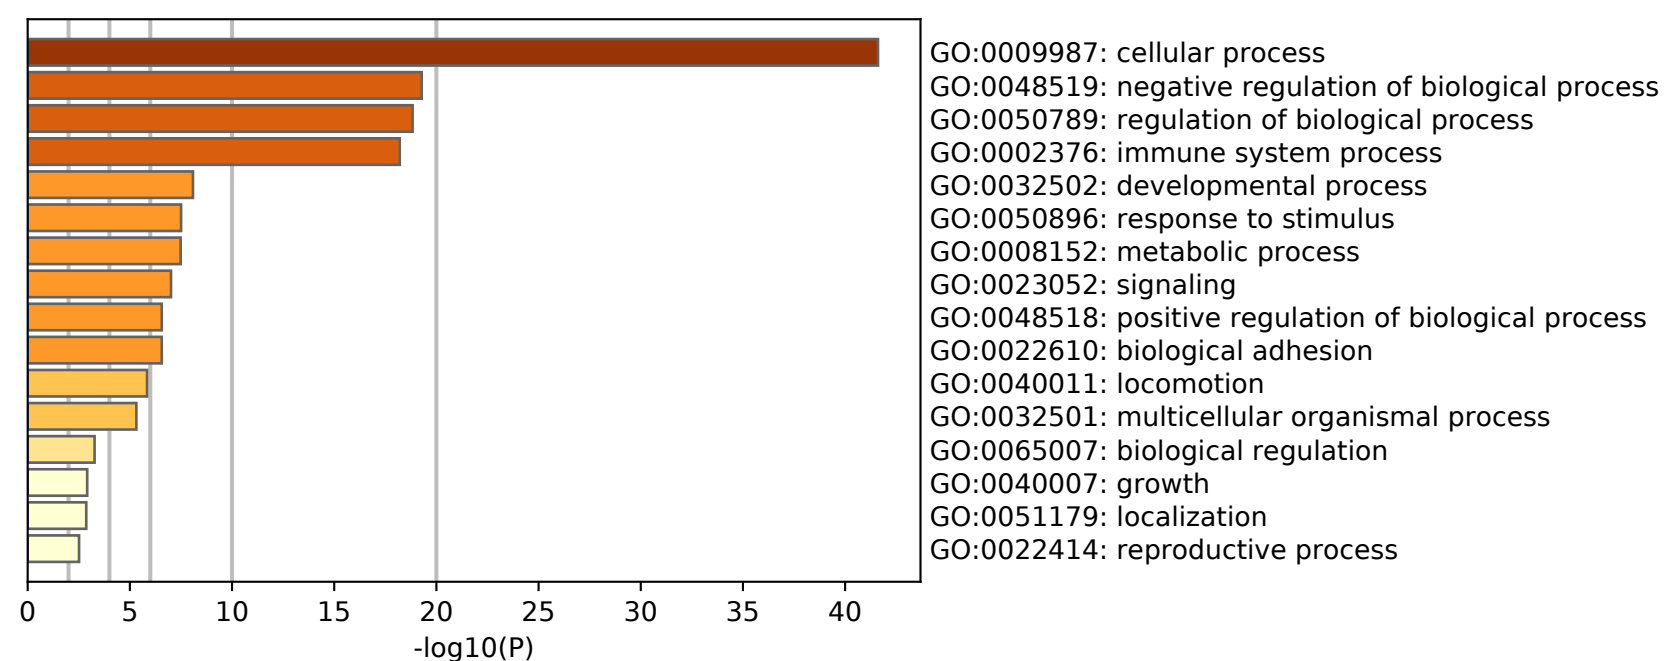

Supplement: table1-data1 [file elife-81290-table1-data1-v2.zip]

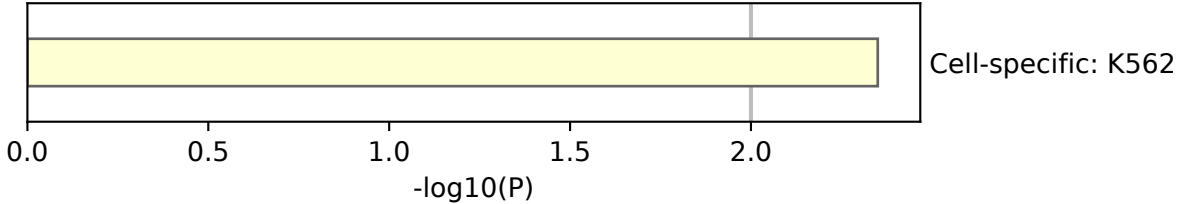

Supplement: table1-data1 [file elife-81290-table1-data1-v2.zip]

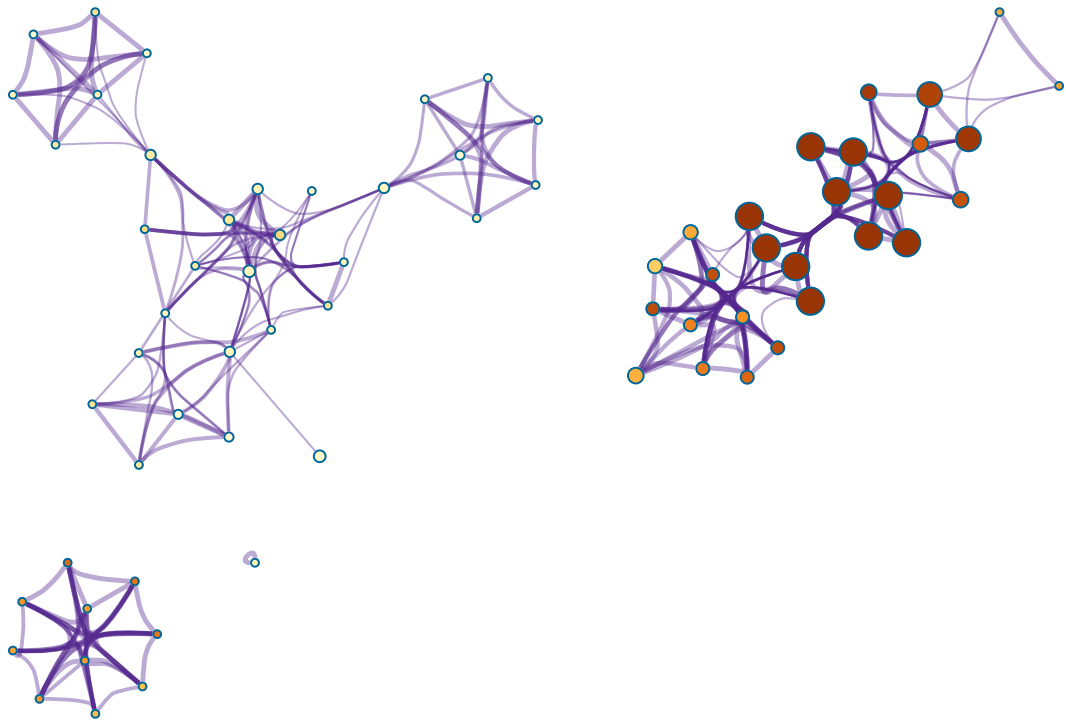



 created by  
<http://metascape.org>

Supplement: table2-data1 [file ColorByPValue.pdf › Enrichment_GO/ColorByPValue.pdf]

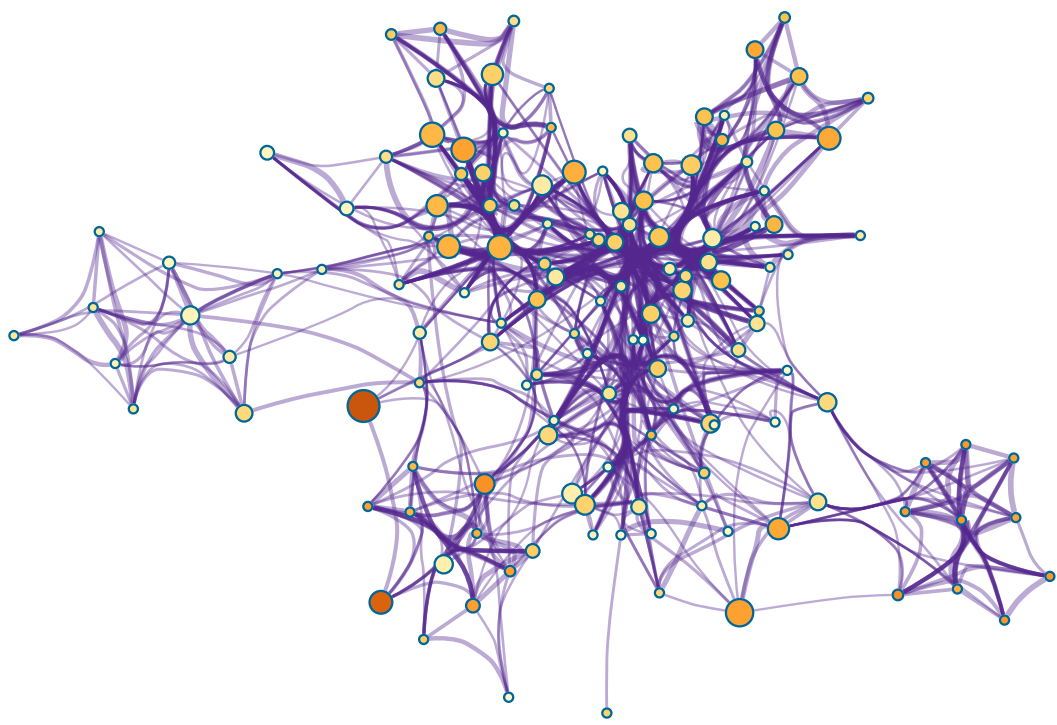



 created by  
<http://metascape.org>

Supplement: table2-data1 [file ColorByPValue.pdf › Enrichment_GO/ColorByPValue.pdf]

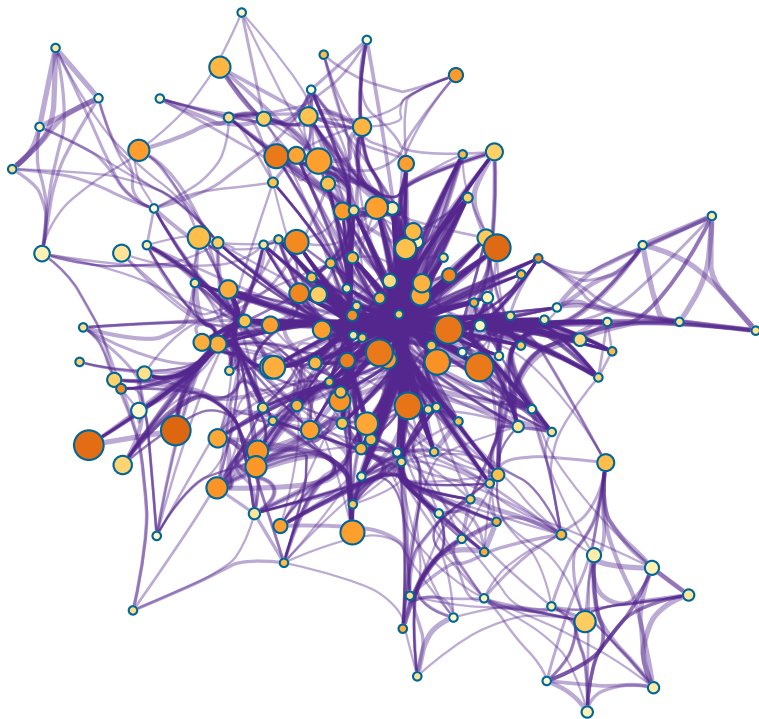



 created by  
<http://metascape.org>

Supplement: table2-data1 [file ColorByPValue.pdf › Enrichment_GO/ColorByPValue.pdf]

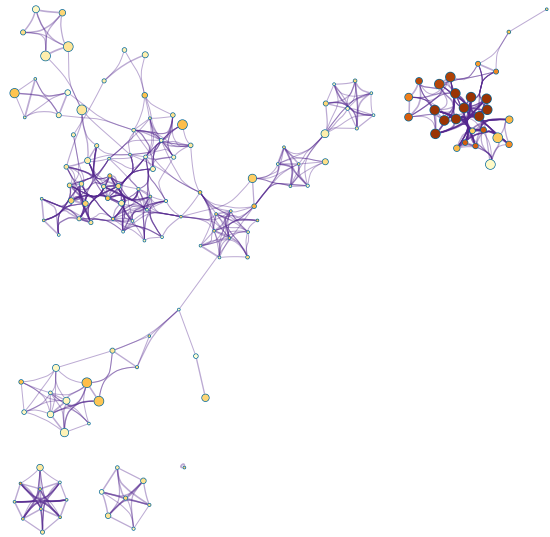



 created by  
<http://metascape.org>

Supplement: table2-data1 [file ColorByPValue.pdf › Enrichment_GO/ColorByPValue.pdf]

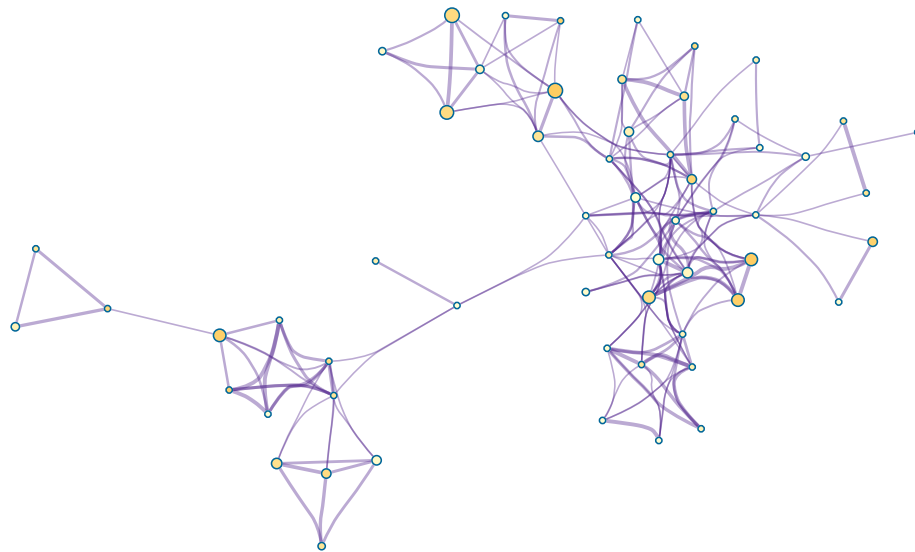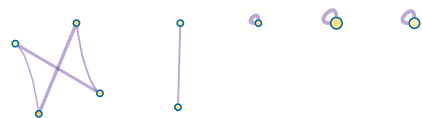



 created by  
<http://metascape.org>

Supplement: table2-data1 [file ColorByPValue.pdf › Enrichment_GO/ColorByPValue.pdf]

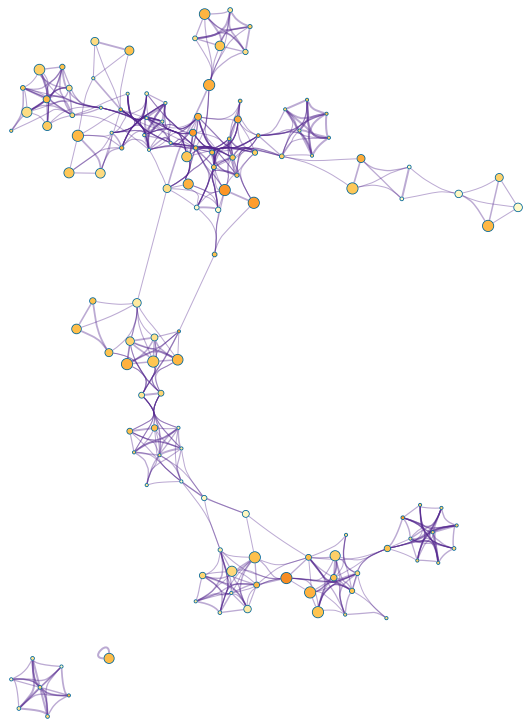



 created by  
<http://metascape.org>

Supplement: table2-data1 [file ColorByPValue.pdf › Enrichment_GO/ColorByPValue.pdf]

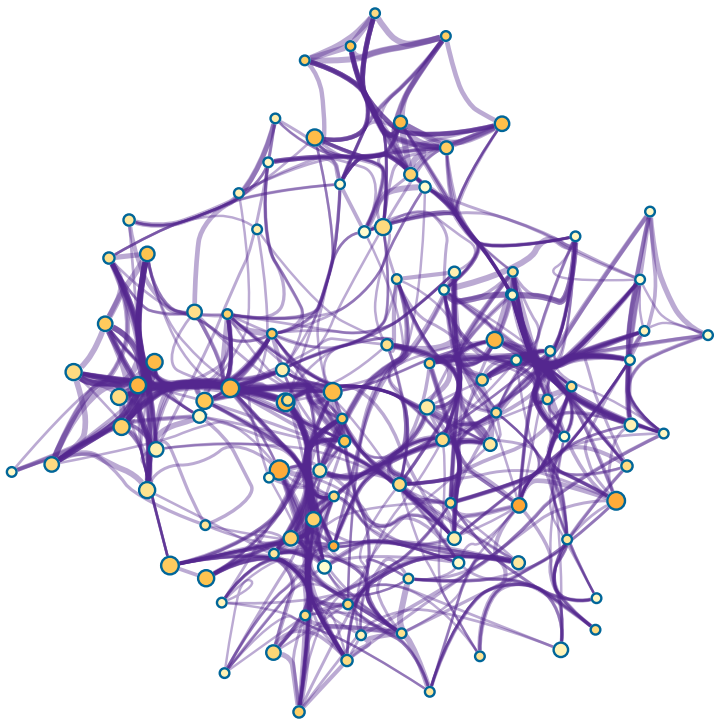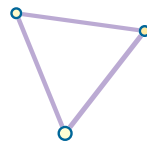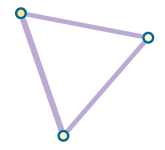



 created by  
<http://metascape.org>

Supplement: table2-data1 [file ColorByPValue.pdf › Enrichment_GO/ColorByPValue.pdf]

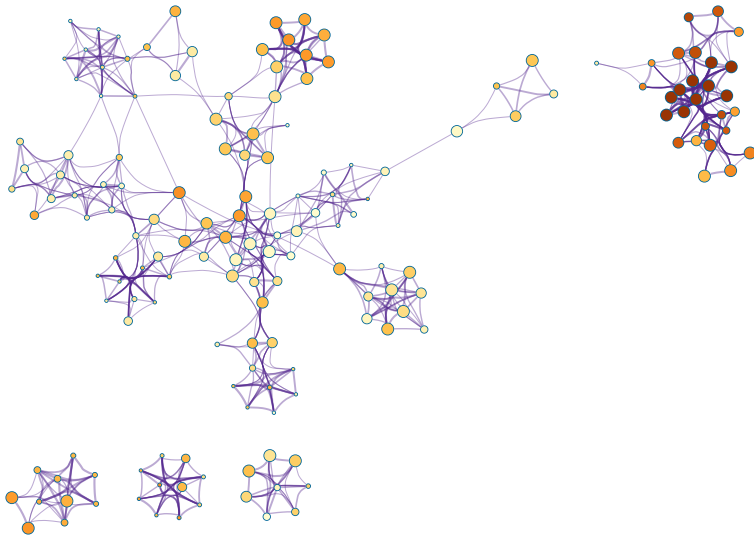



 created by  
<http://metascape.org>

Supplement: table2-data1 [file ColorByPValue.pdf › Enrichment_GO/ColorByPValue.pdf]

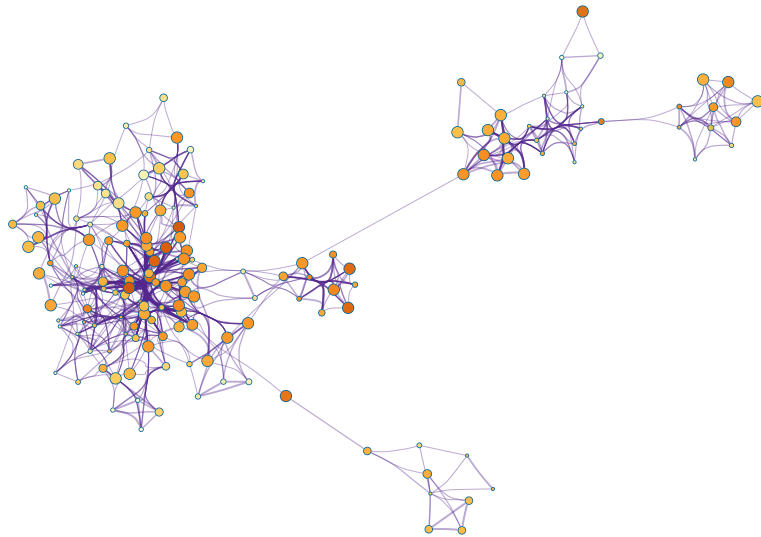



 created by  
<http://metascape.org>

Supplement: table2-data1 [file ColorByPValue.pdf › Enrichment_GO/ColorByPValue.pdf]

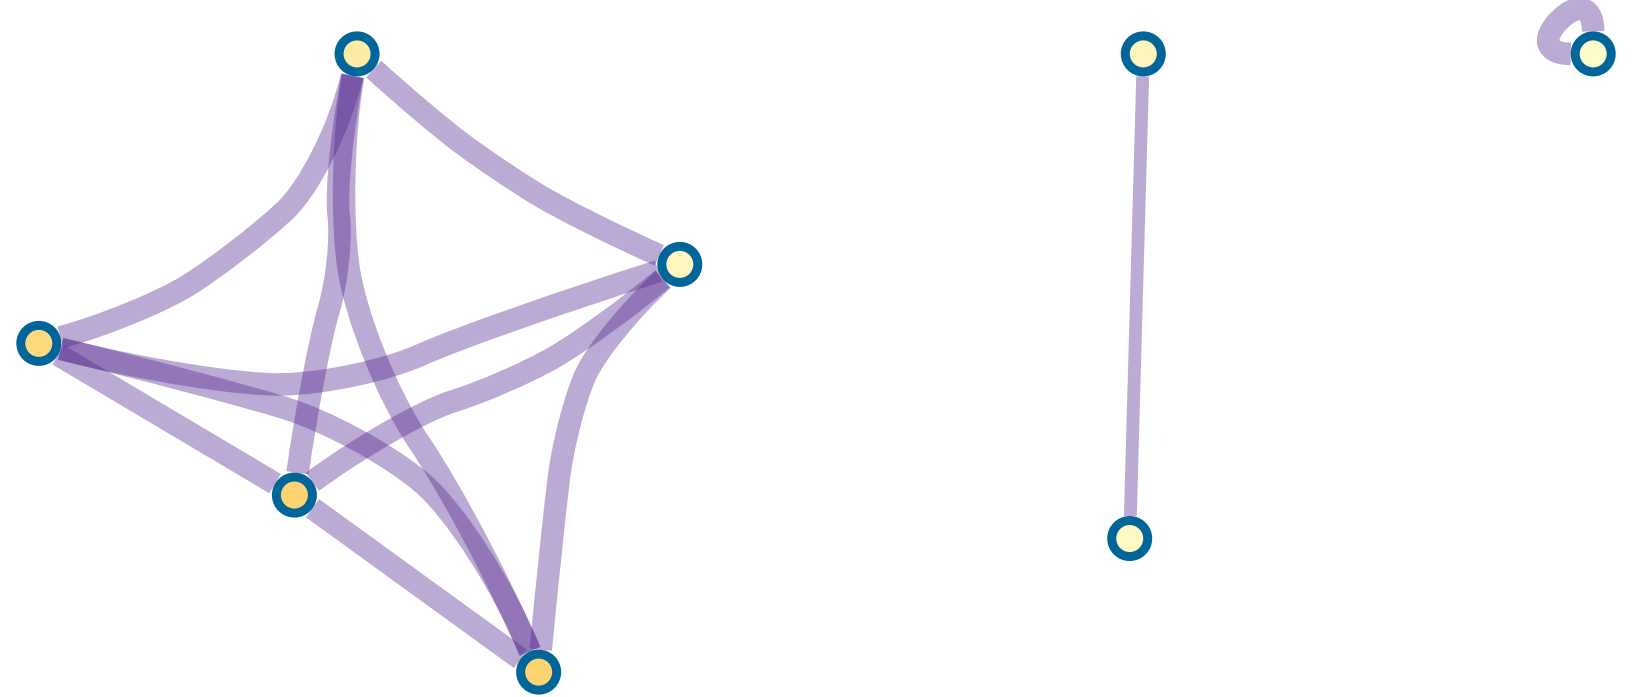



 created by  
<http://metascape.org>

Supplement: table2-data1 [file ColorByPValue.pdf › Enrichment_GO/ColorByPValue.pdf]

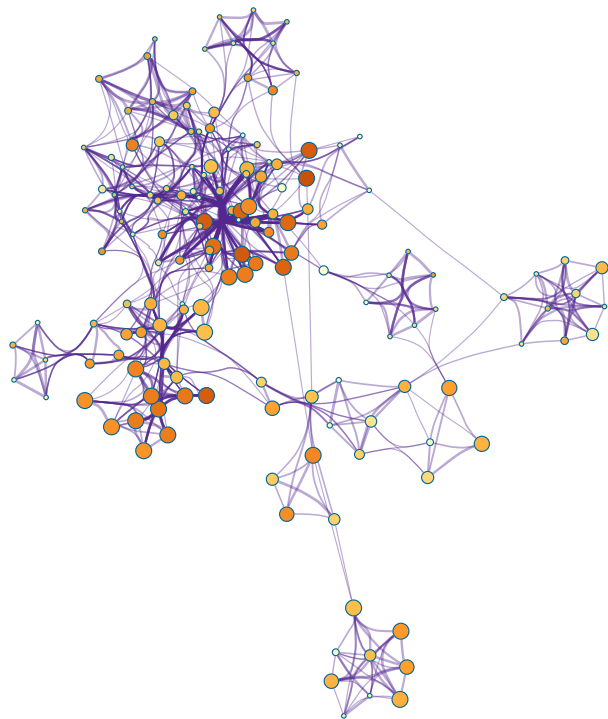



 created by  
<http://metascape.org>

Supplement: table2-data1 [file ColorByPValue.pdf › Enrichment_GO/ColorByPValue.pdf]

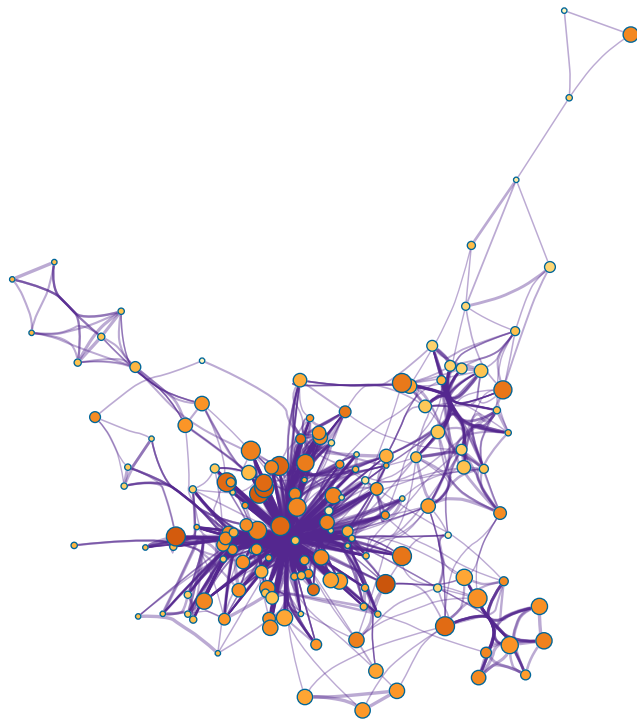



 created by  
<http://metascape.org>

Supplement: table2-data1 [file ColorByPValue.pdf › Enrichment_GO/ColorByPValue.pdf]

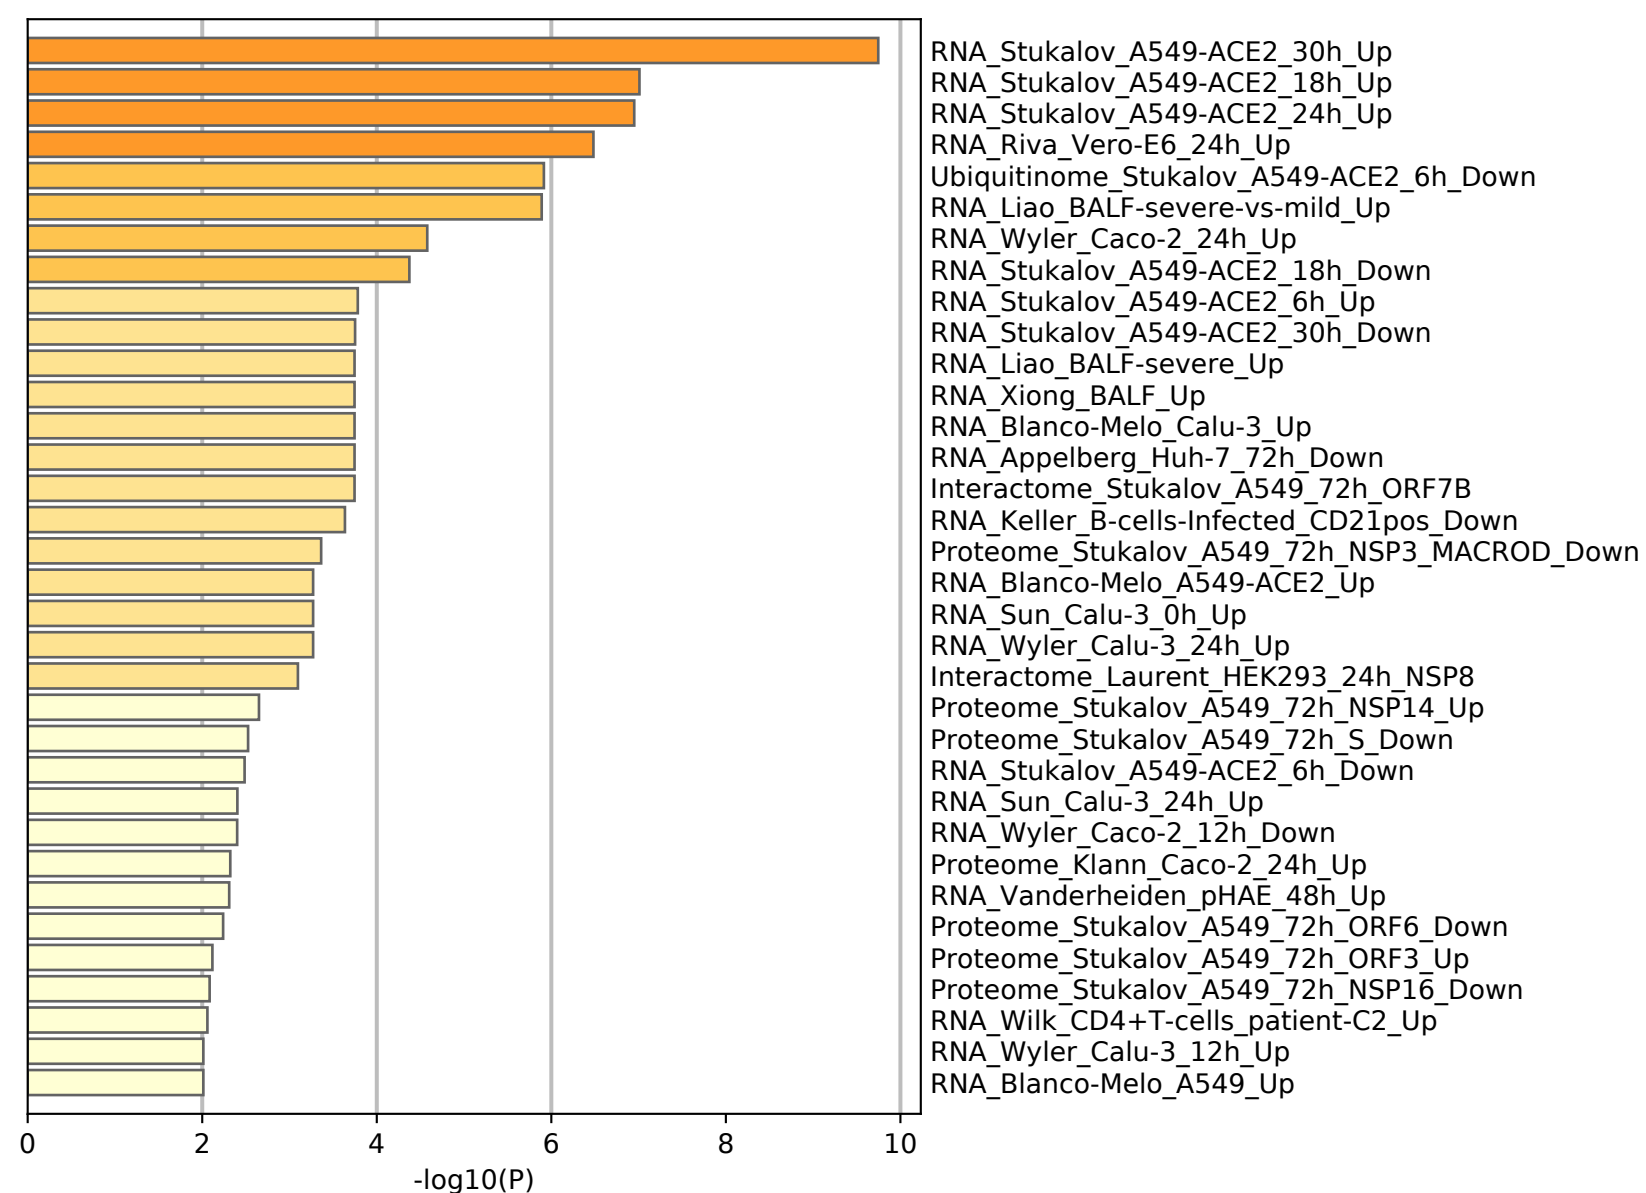

Supplement: table2-data1 [file HeatmapSelectedGO_COVID.pdf › Enrichment_QC/HeatmapSelectedGO_COVID.pdf]

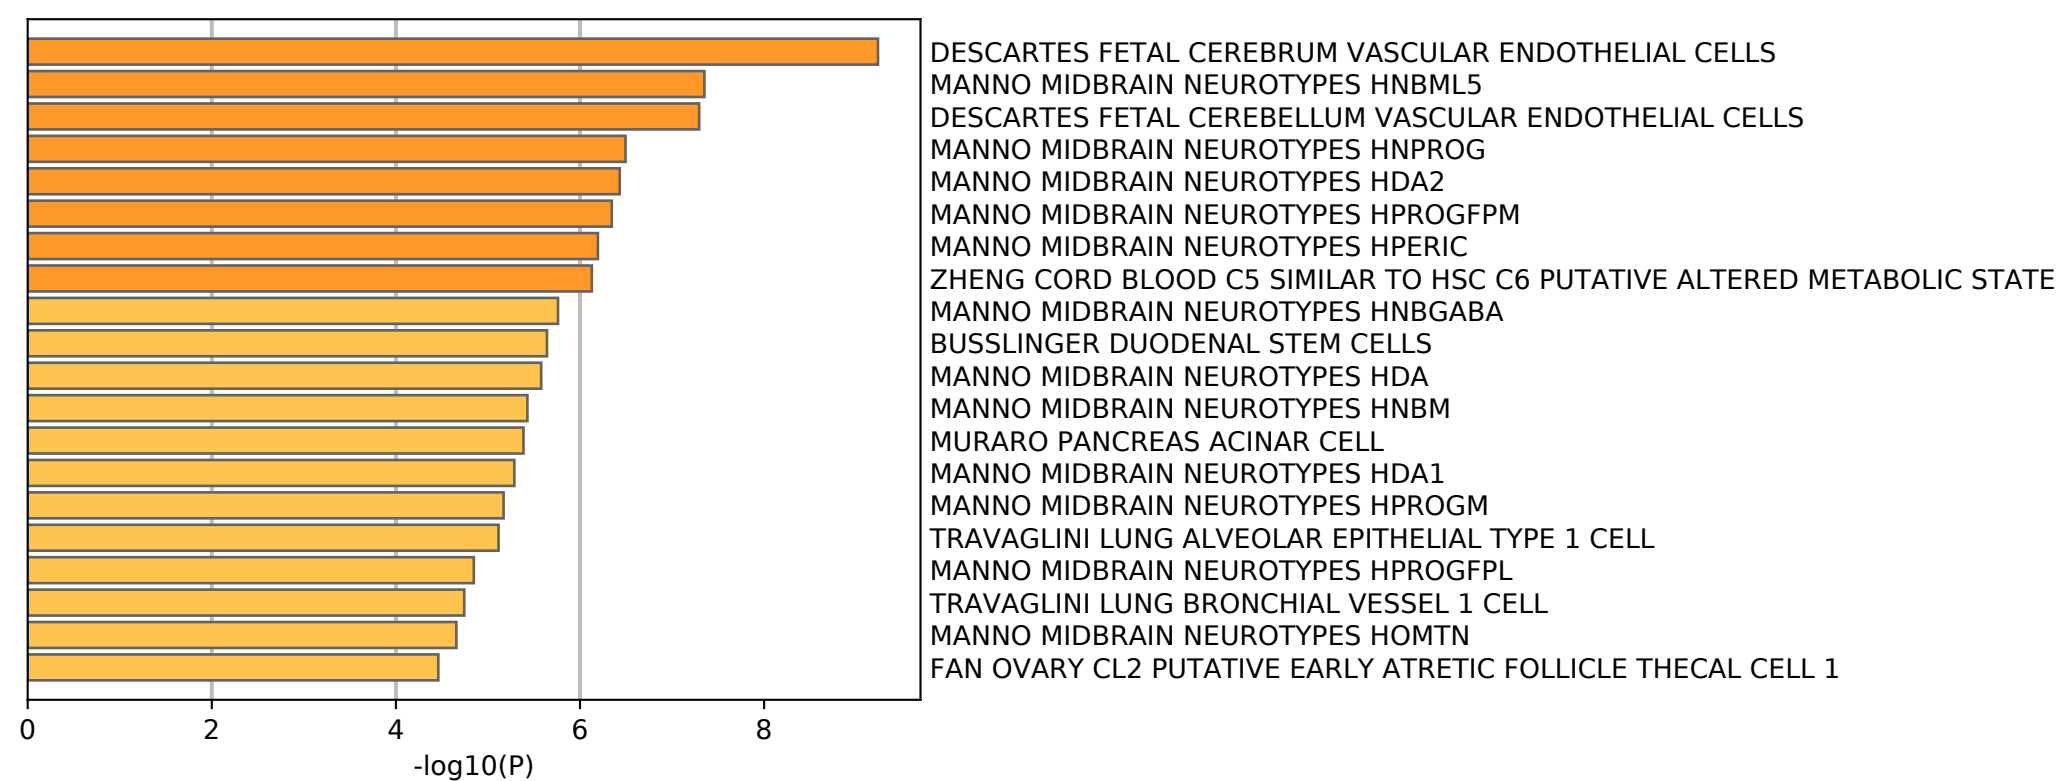

Supplement: table2-data1 [file HeatmapSelectedGO_Cell_Type_Signatures.pdf › Enrichment_QC/HeatmapSelectedGO_Cell_Type_Signatures.pdf]

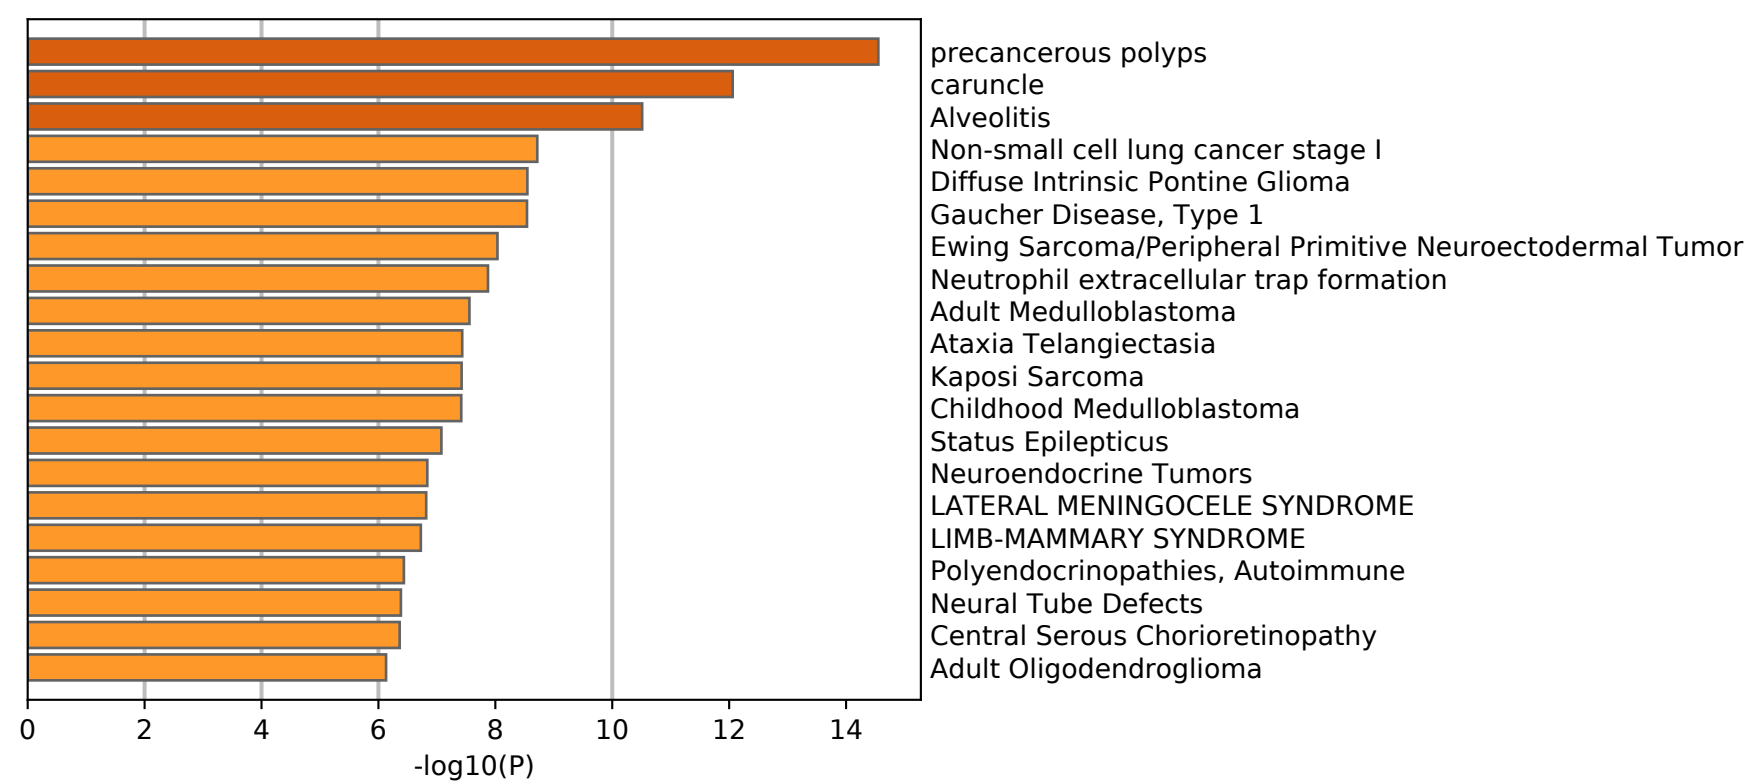

Supplement: table2-data1 [file HeatmapSelectedGO_DisGeNET.pdf › Enrichment_QC/HeatmapSelectedGO_DisGeNET.pdf]

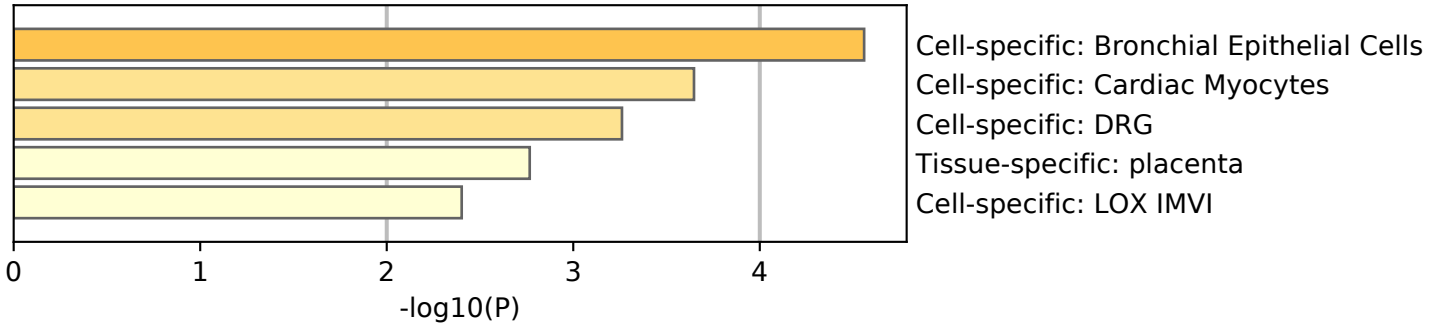

Supplement: table2-data1 [file HeatmapSelectedGO_PaGenBase.pdf › Enrichment_QC/HeatmapSelectedGO_PaGenBase.pdf]

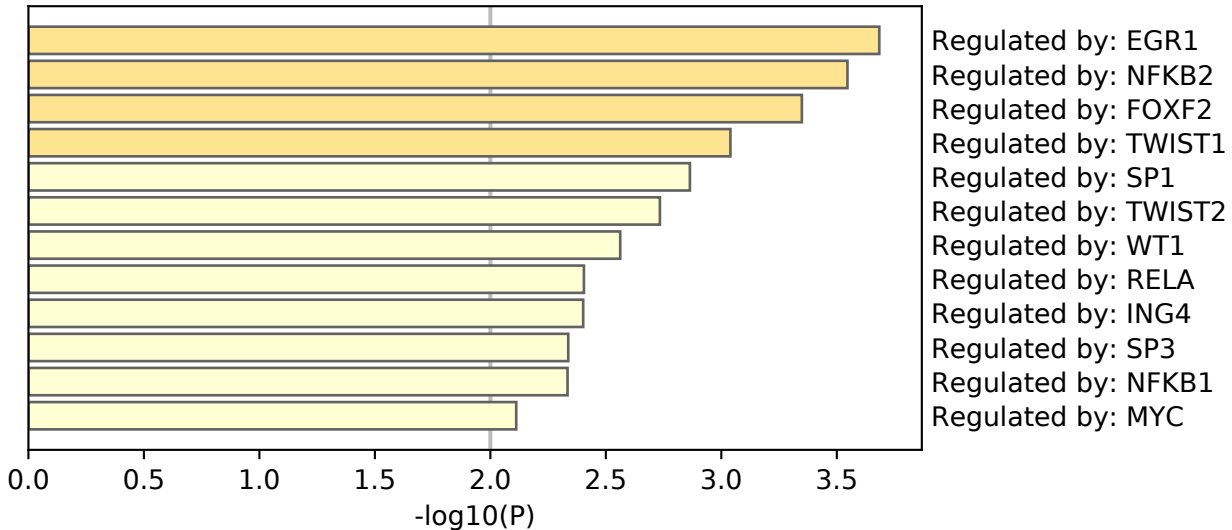

Supplement: table2-data1 [file HeatmapSelectedGO_TRRUST.pdf › Enrichment_QC/HeatmapSelectedGO_TRRUST.pdf]

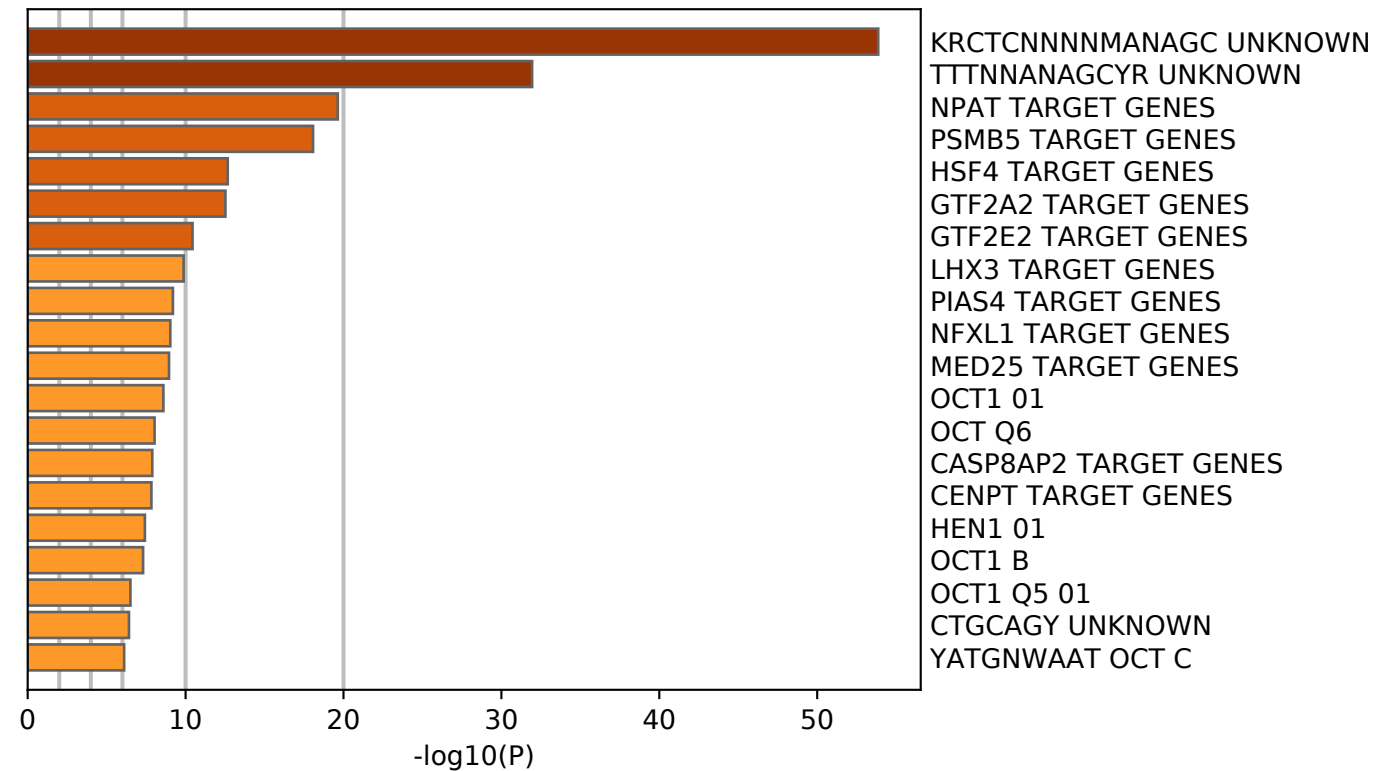

Supplement: table2-data1 [file HeatmapSelectedGO_Transcription_Factor_Targets.pdf › Enrichment_QC/HeatmapSelectedGO_Transcription_Factor_Targets.pdf]

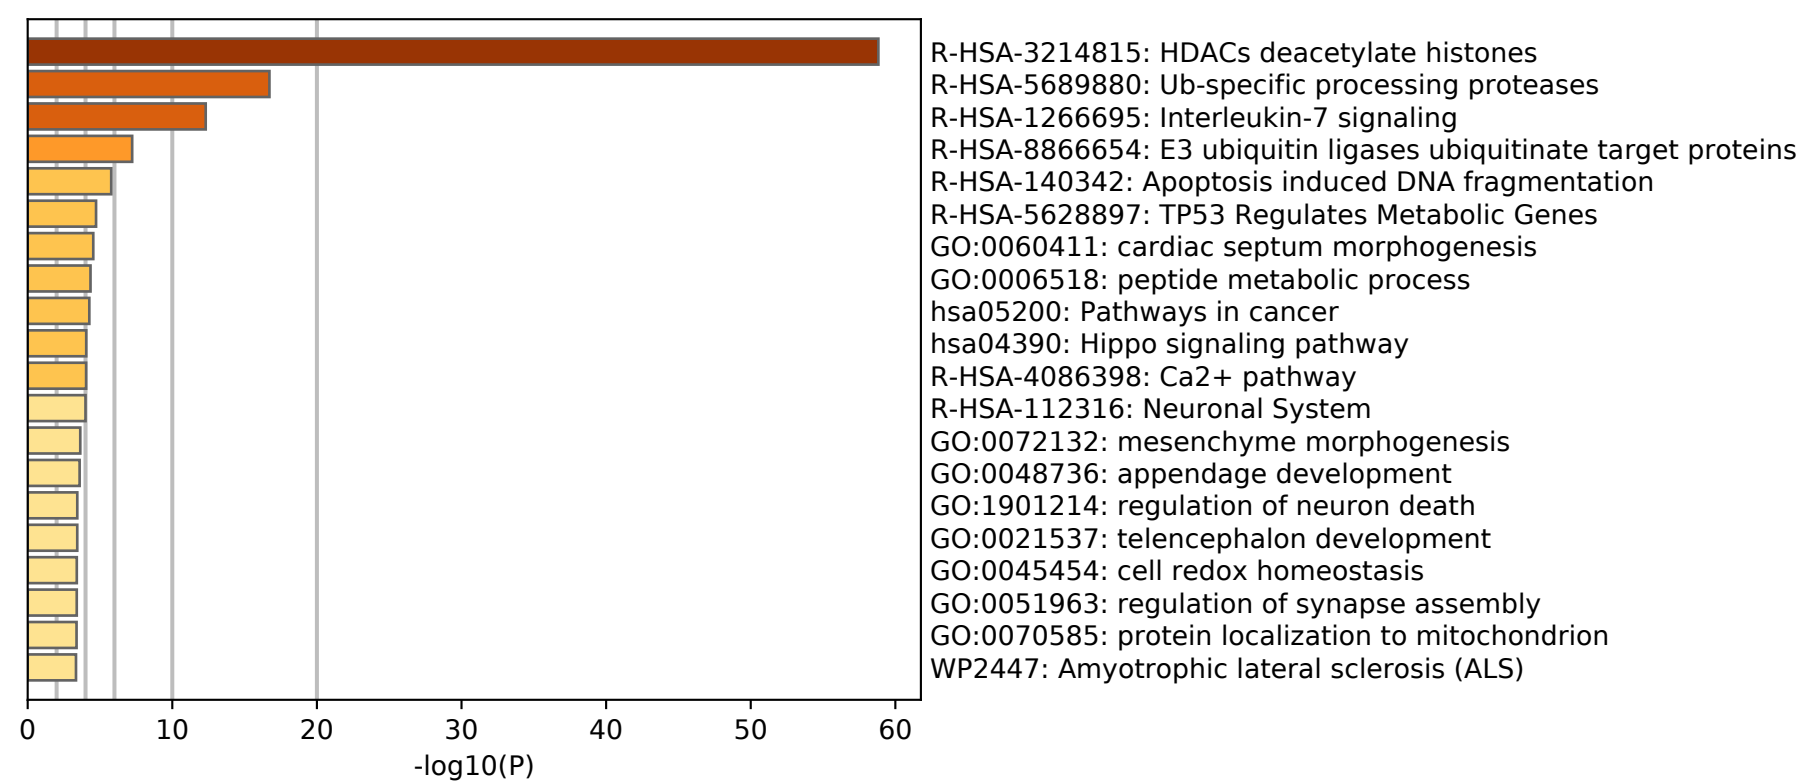

Supplement: table2-data1 [file HeatmapSelectedGO.pdf › Enrichment_heatmap/HeatmapSelectedGO.pdf]

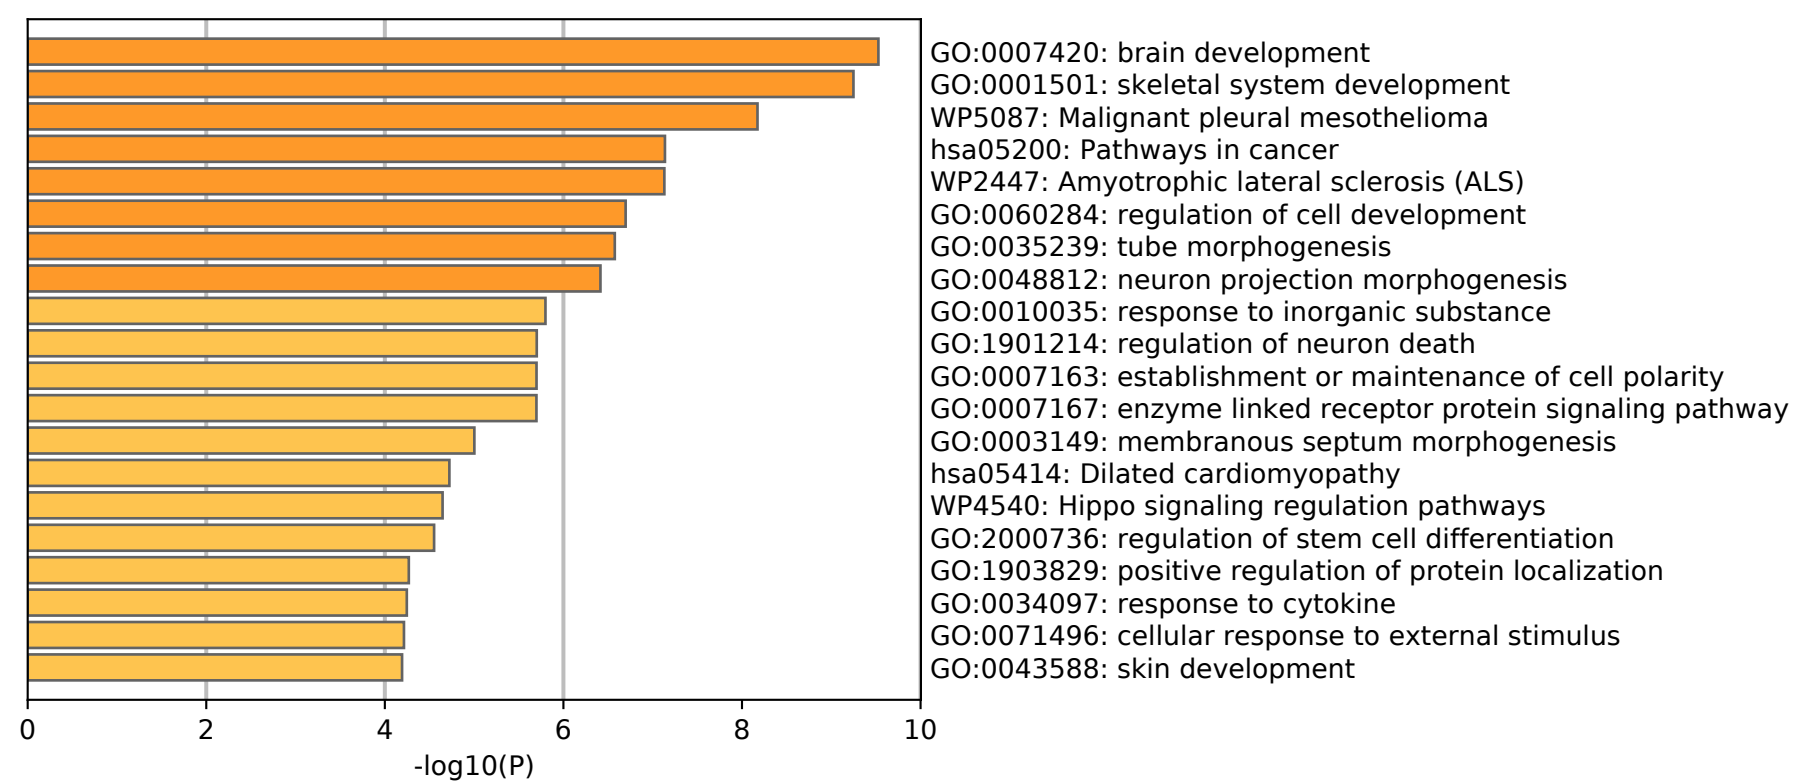

Supplement: table2-data1 [file HeatmapSelectedGO.pdf › Enrichment_heatmap/HeatmapSelectedGO.pdf]

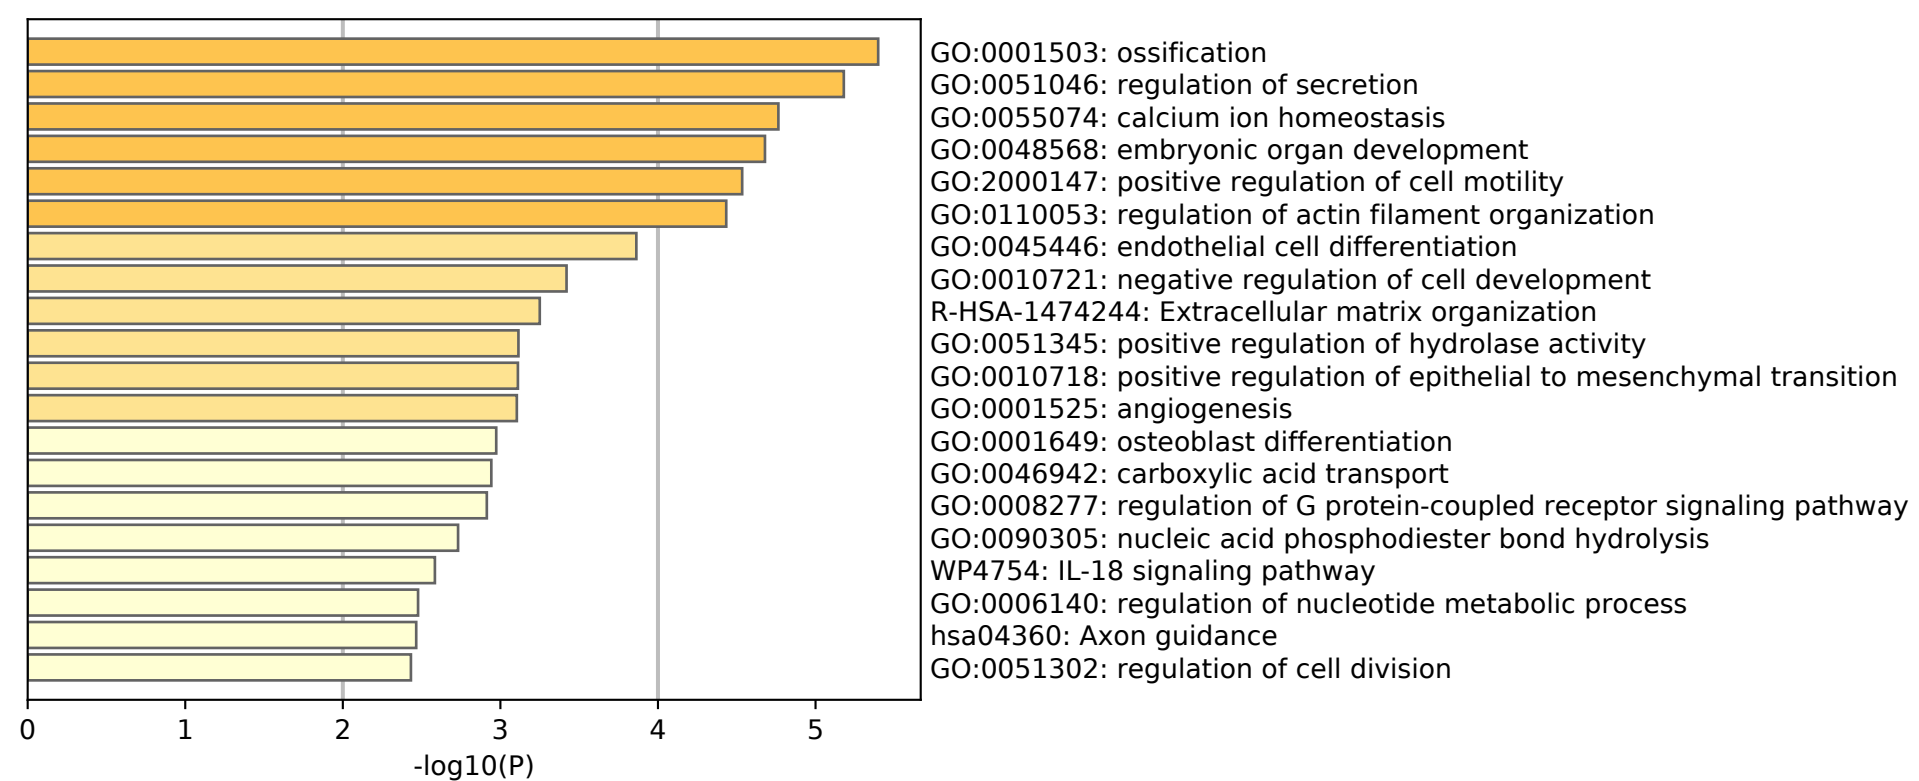

Supplement: table2-data1 [file HeatmapSelectedGO.pdf › Enrichment_heatmap/HeatmapSelectedGO.pdf]

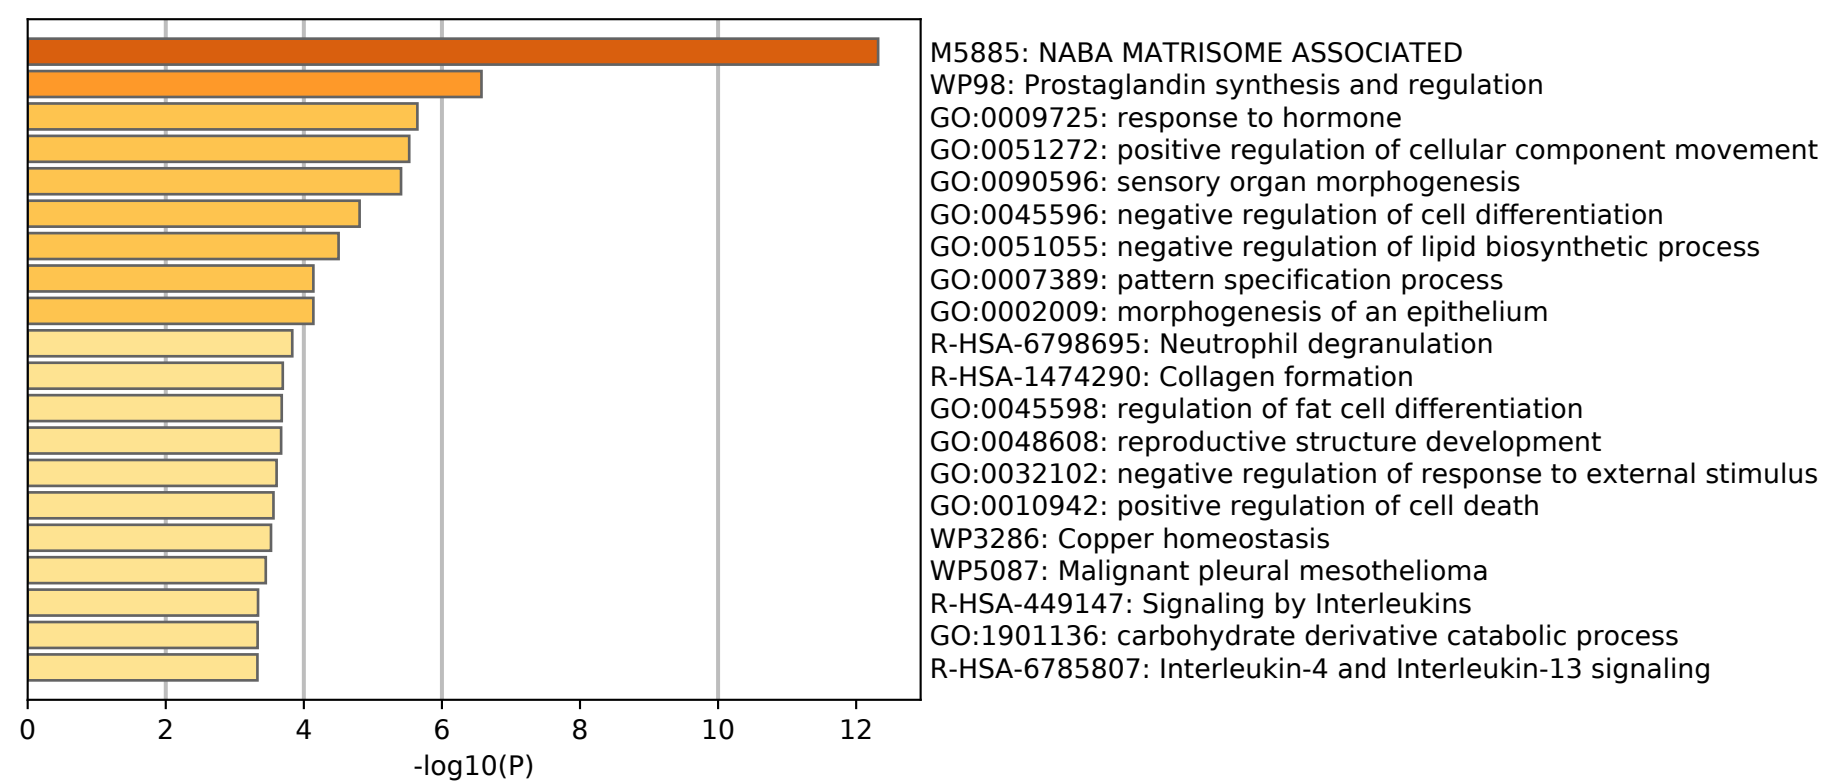

Supplement: table2-data1 [file HeatmapSelectedGO.pdf › Enrichment_heatmap/HeatmapSelectedGO.pdf]

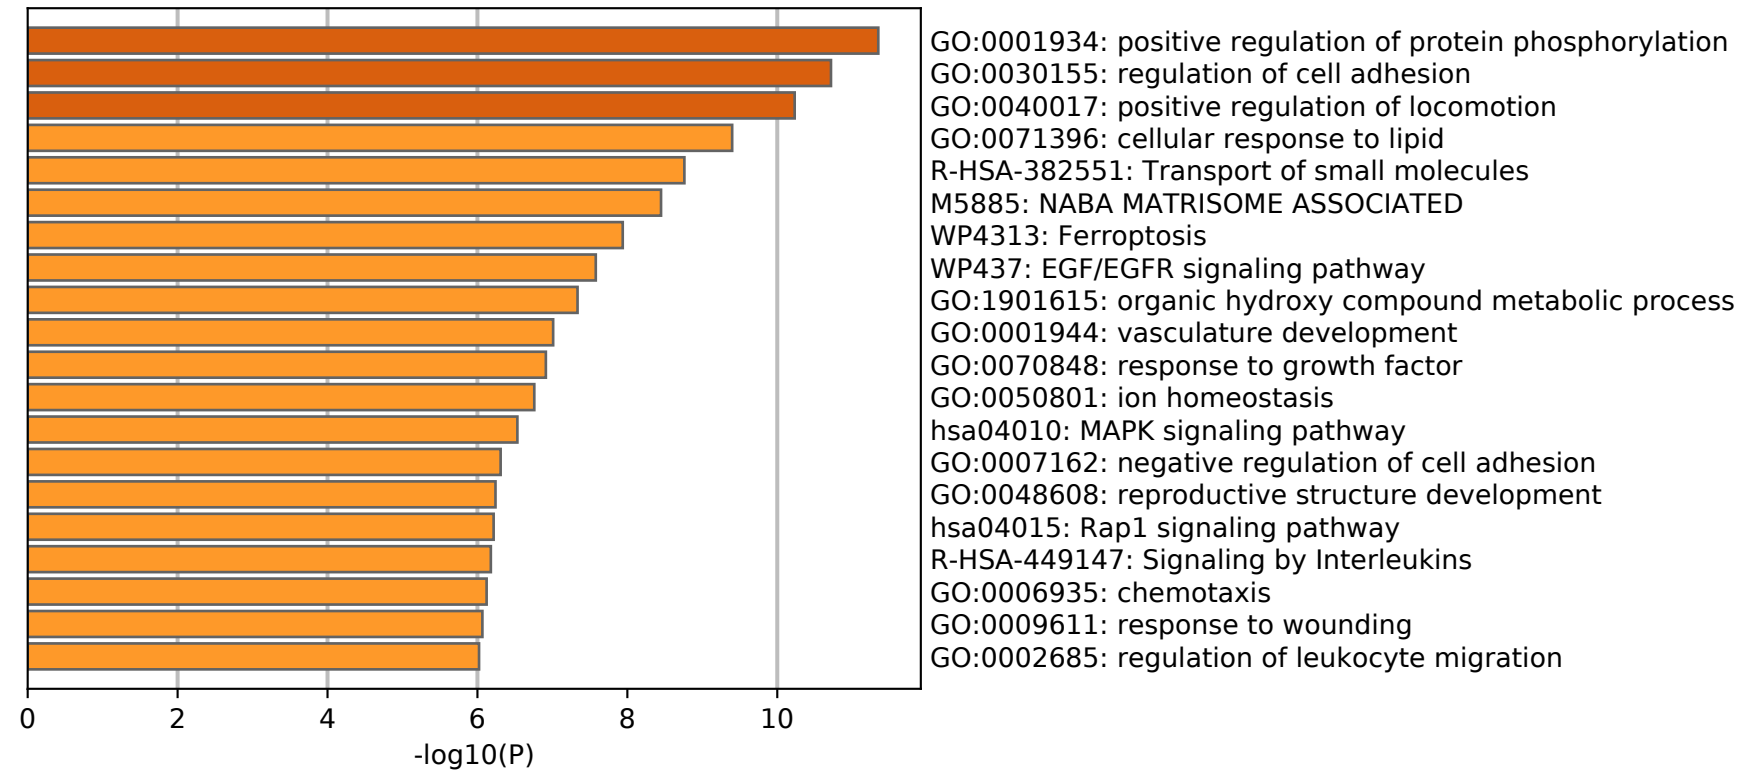

Supplement: table2-data1 [file HeatmapSelectedGO.pdf › Enrichment_heatmap/HeatmapSelectedGO.pdf]

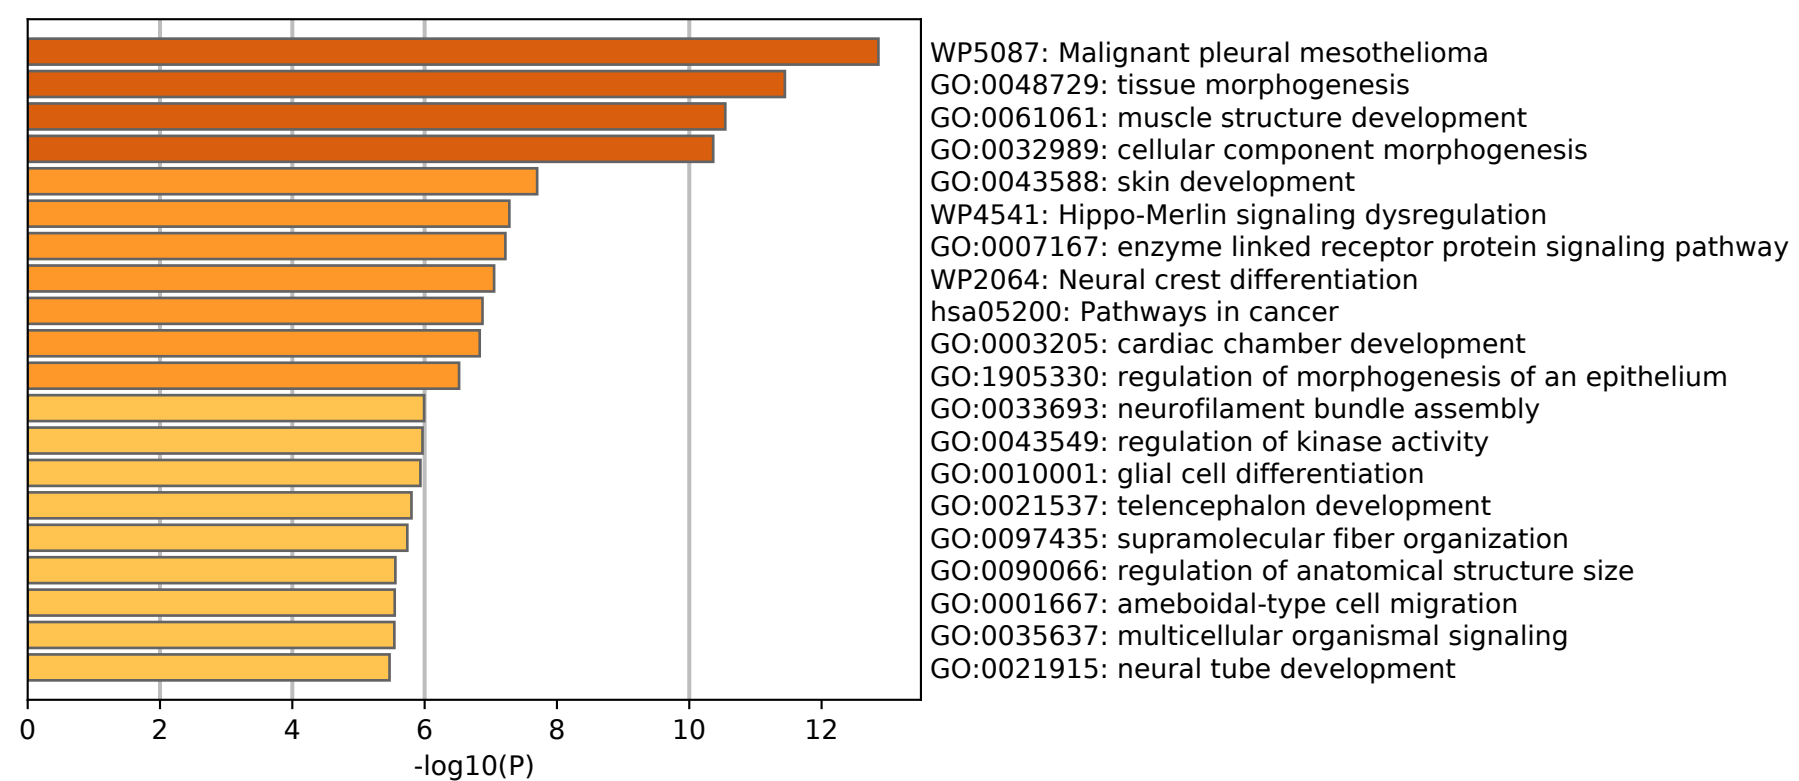

Supplement: table2-data1 [file HeatmapSelectedGO.pdf › Enrichment_heatmap/HeatmapSelectedGO.pdf]
