# Supplementary figures and images for: Transcriptional profiling of Hutchinson-Gilford Progeria syndrome fibroblasts reveals deficits in mesenchymal stem cell commitment to differentiation related to early events in endochondral ossification (part 2 of 2)
Source: eLife journal article supplement (doi:10.7554/elife.81290), 2022-12-29

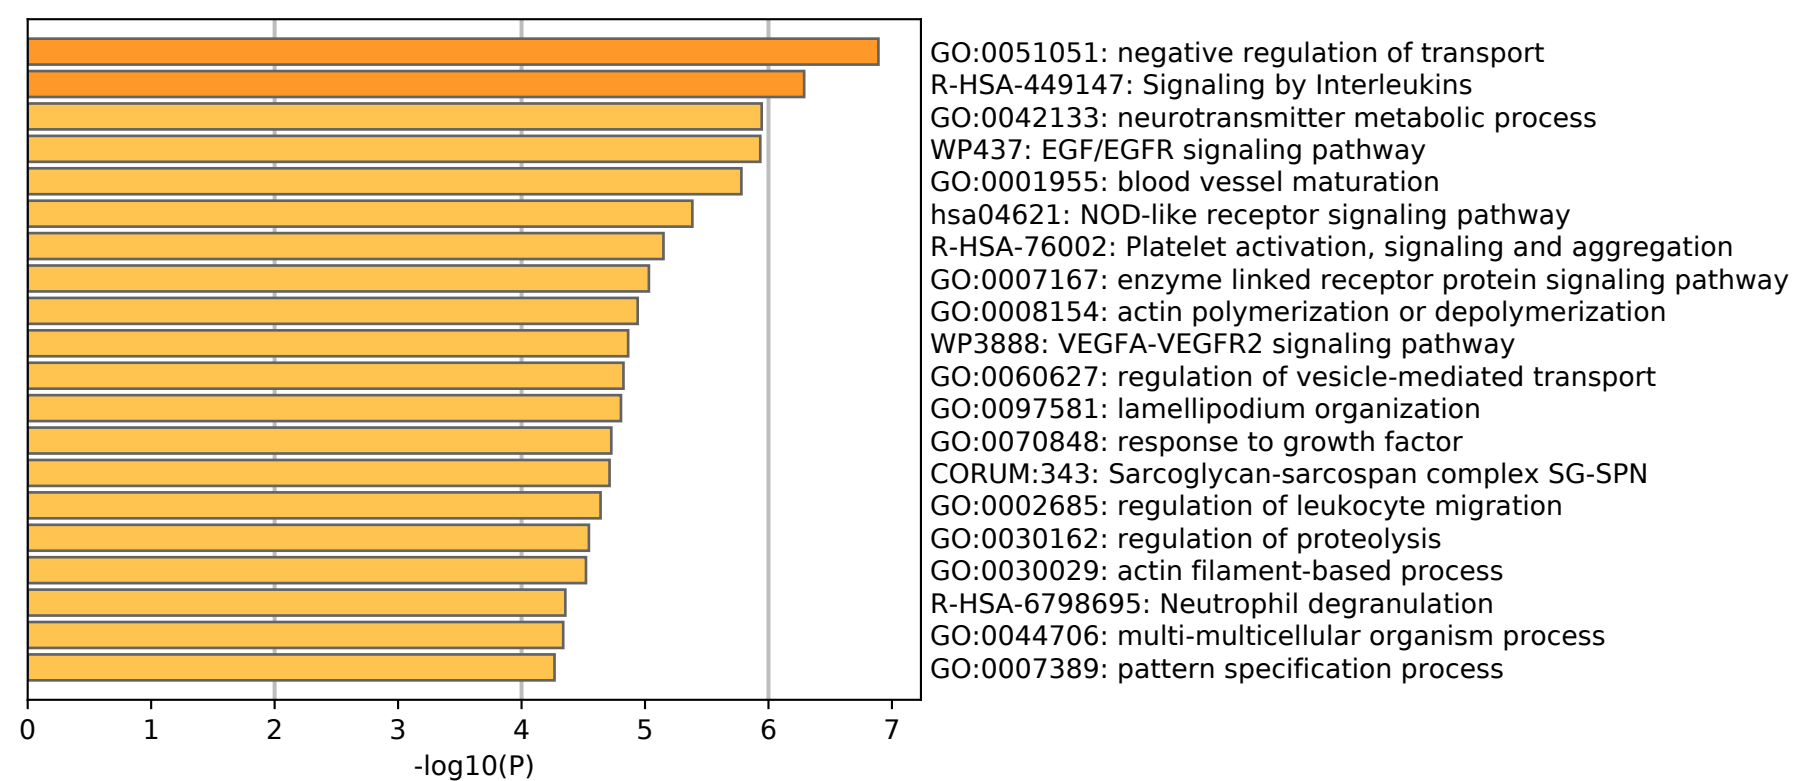

Supplement: table2-data1 [file HeatmapSelectedGO.pdf › Enrichment_heatmap/HeatmapSelectedGO.pdf]

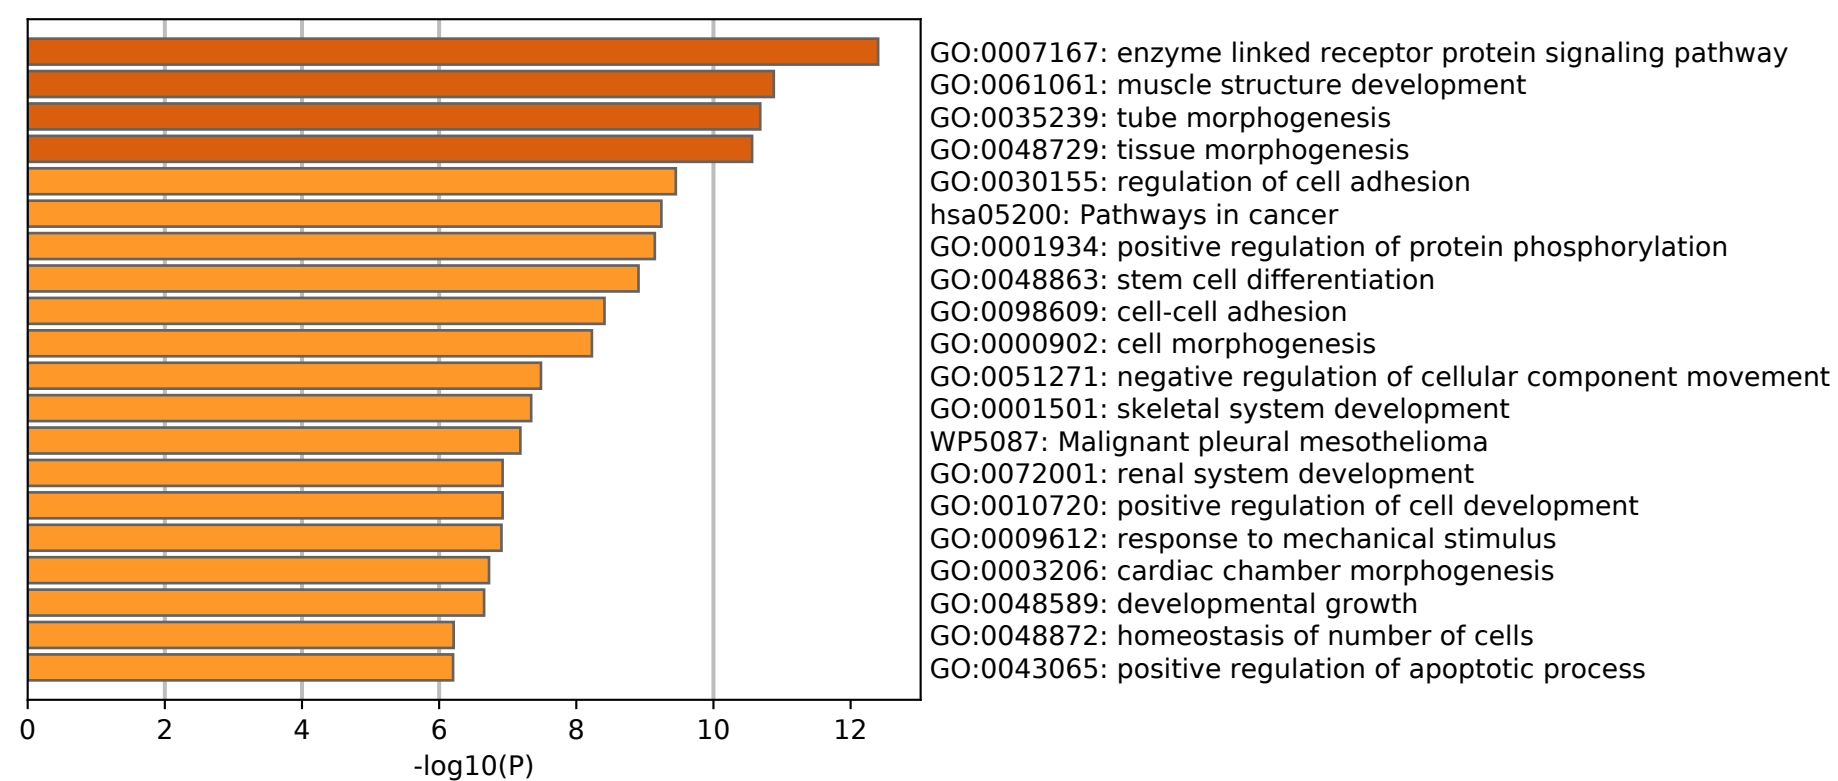

Supplement: table2-data1 [file HeatmapSelectedGO.pdf › Enrichment_heatmap/HeatmapSelectedGO.pdf]

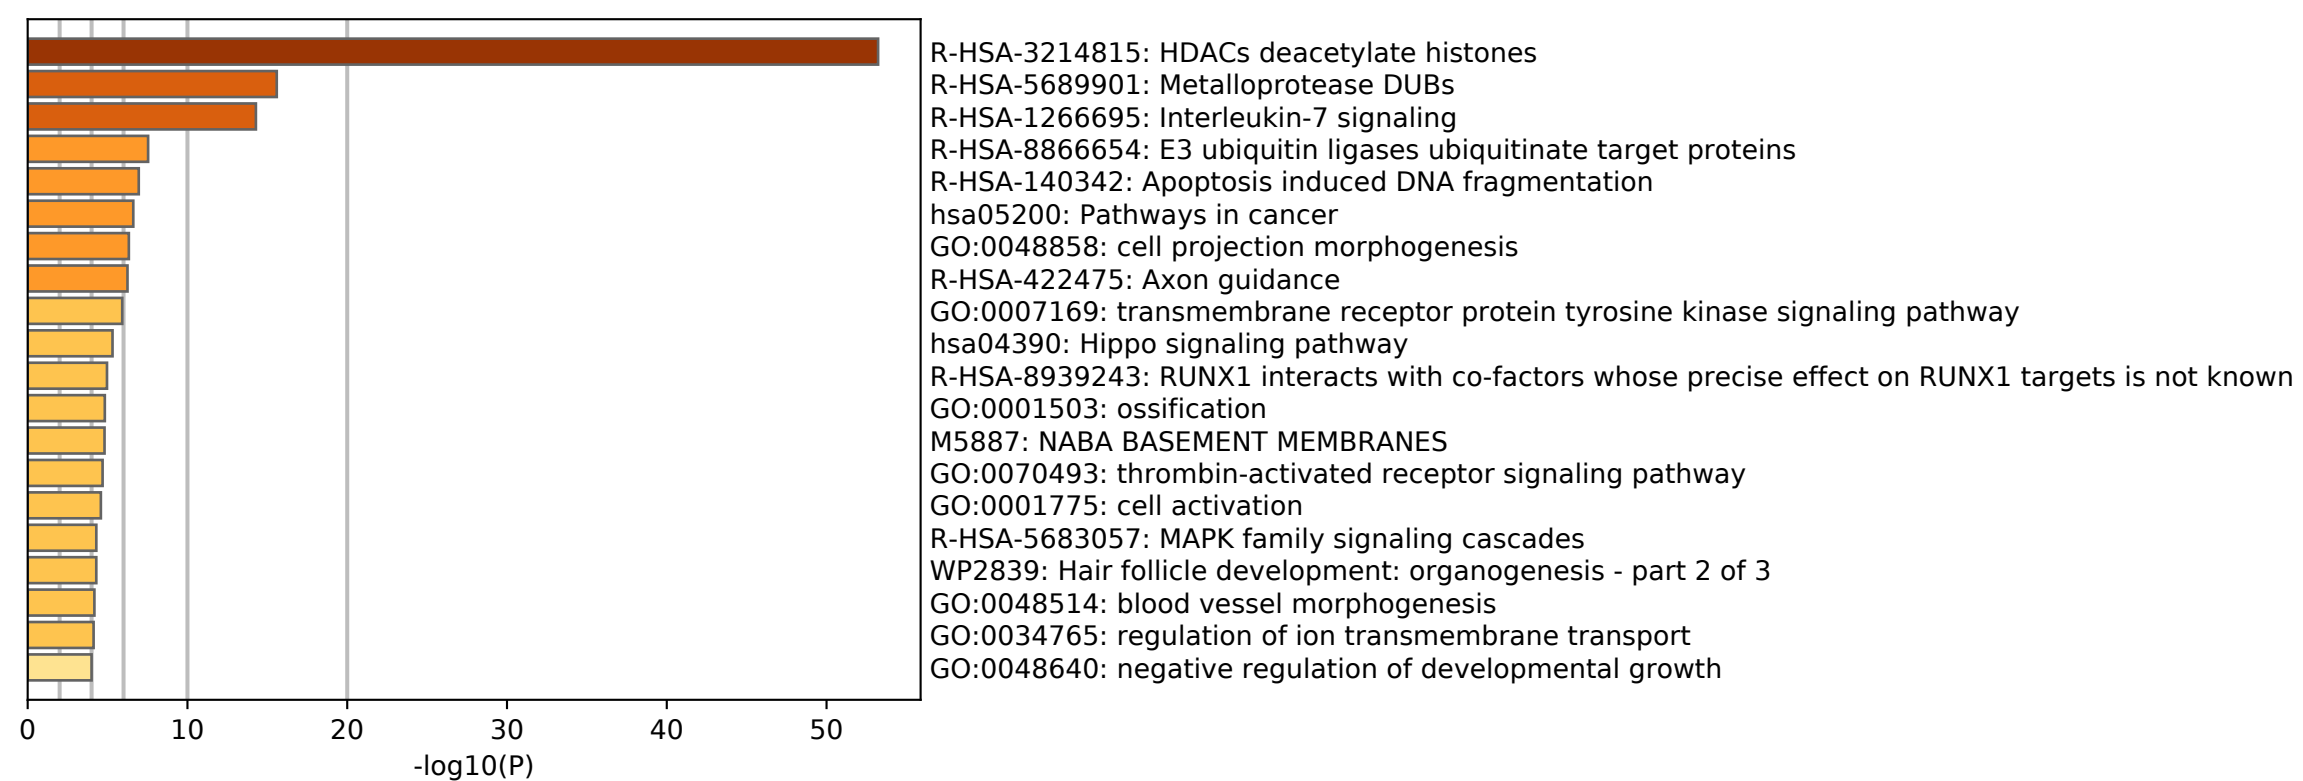

Supplement: table2-data1 [file HeatmapSelectedGO.pdf › Enrichment_heatmap/HeatmapSelectedGO.pdf]

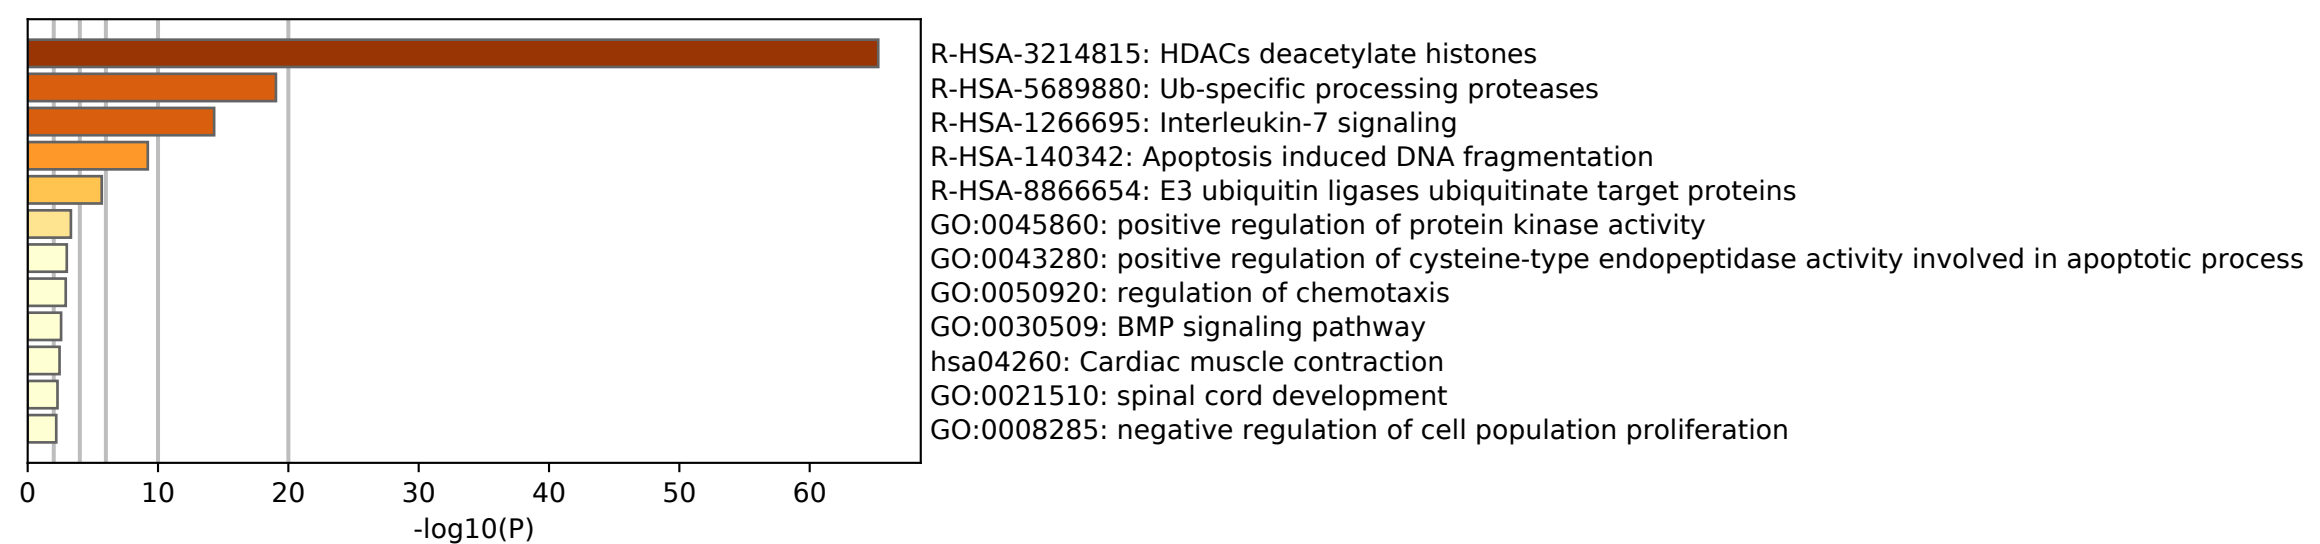

Supplement: table2-data1 [file HeatmapSelectedGO.pdf › Enrichment_heatmap/HeatmapSelectedGO.pdf]

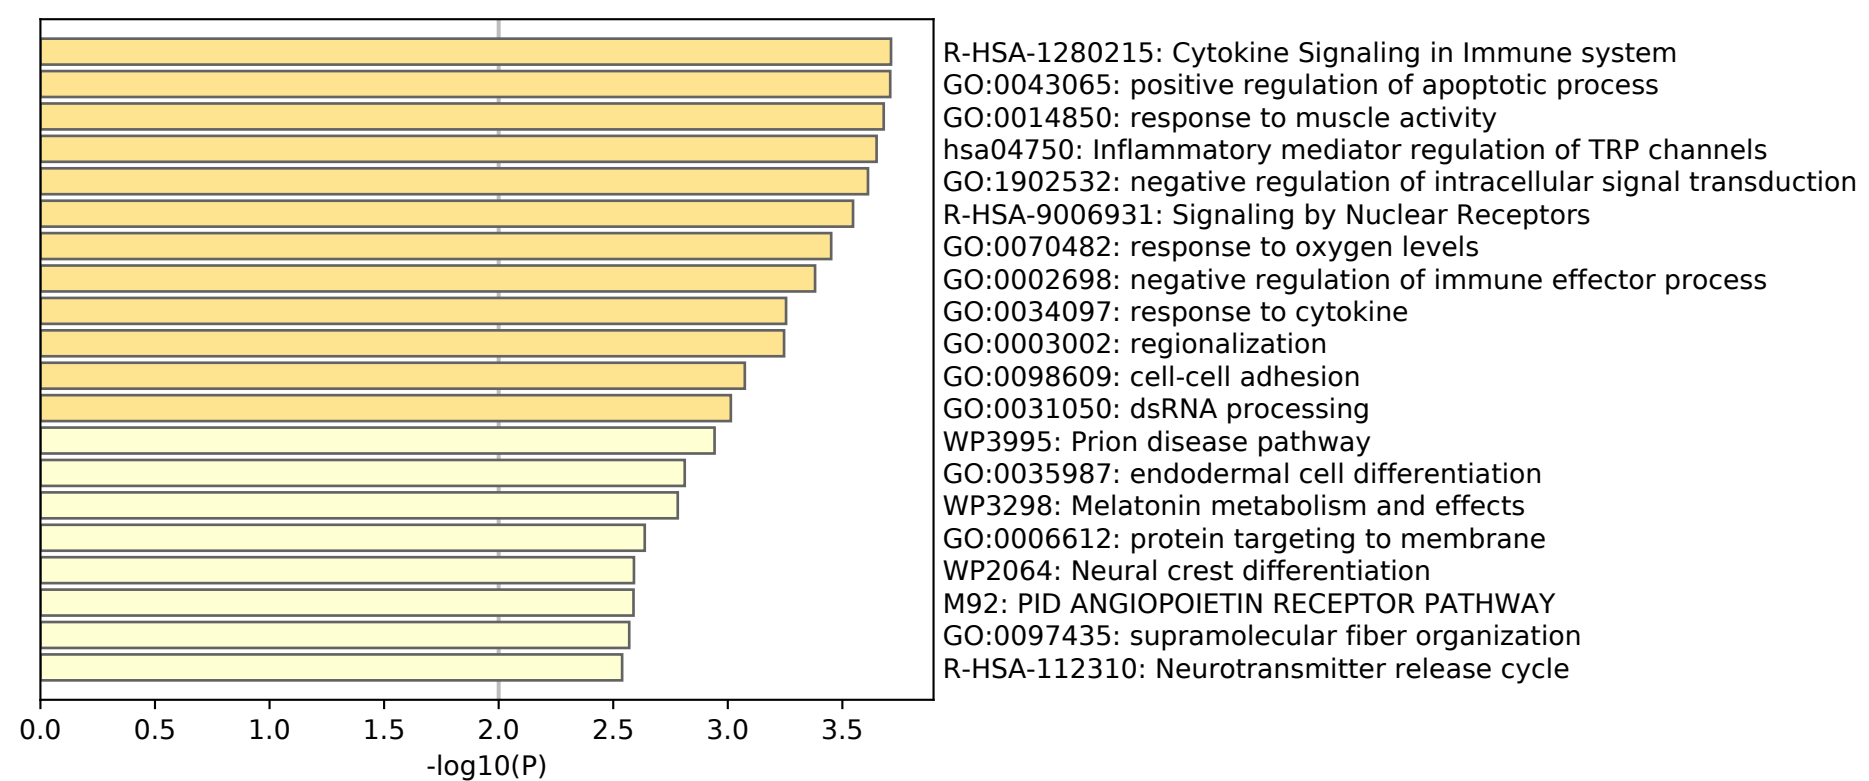

Supplement: table2-data1 [file HeatmapSelectedGO.pdf › Enrichment_heatmap/HeatmapSelectedGO.pdf]

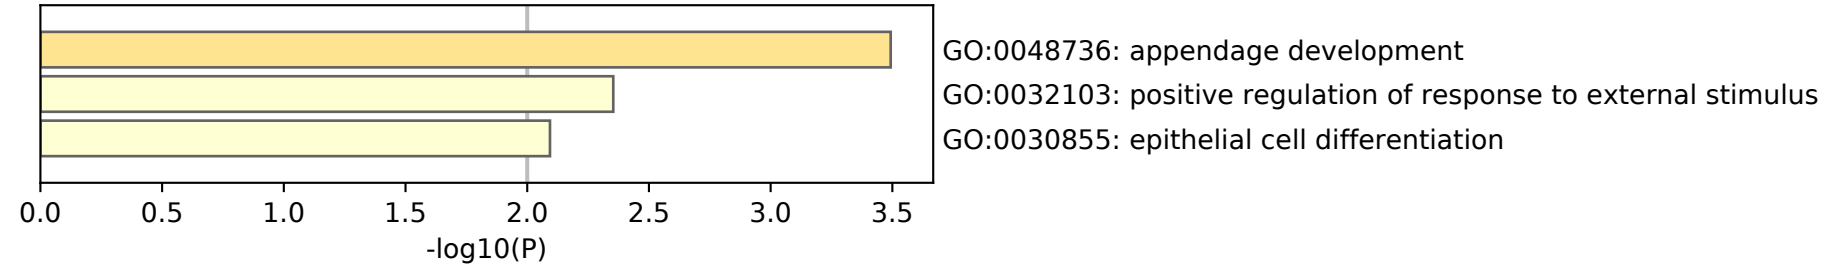

Supplement: table2-data1 [file HeatmapSelectedGO.pdf › Enrichment_heatmap/HeatmapSelectedGO.pdf]

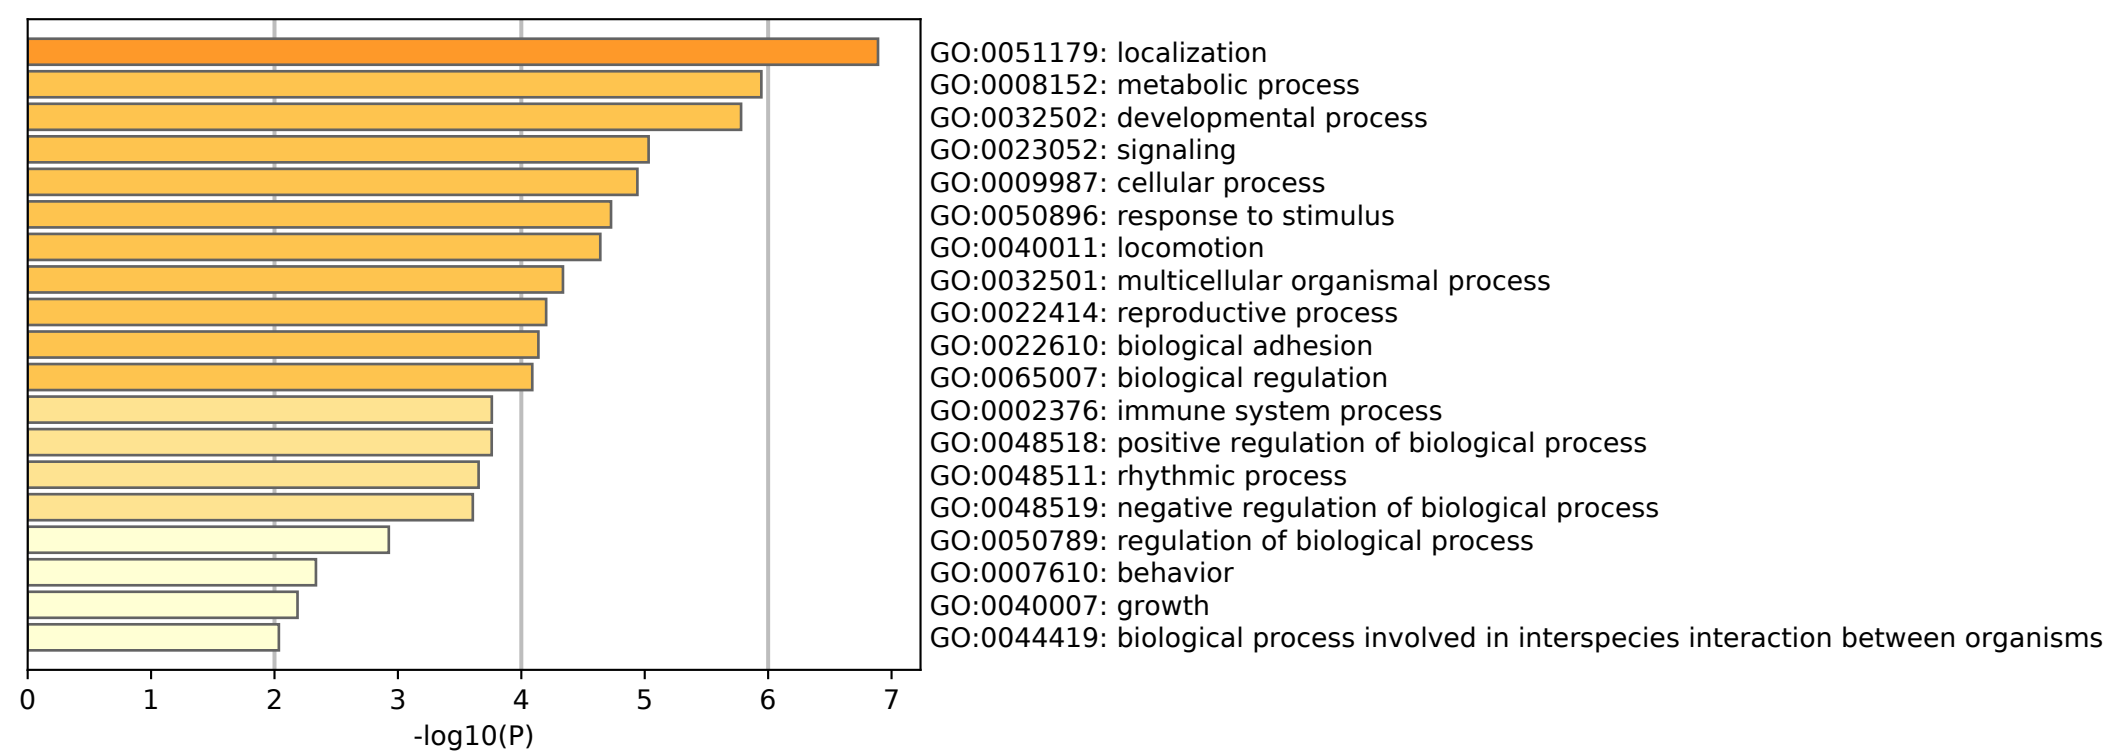

Supplement: table2-data1 [file HeatmapSelectedGOParent.pdf › Enrichment_heatmap/HeatmapSelectedGOParent.pdf]

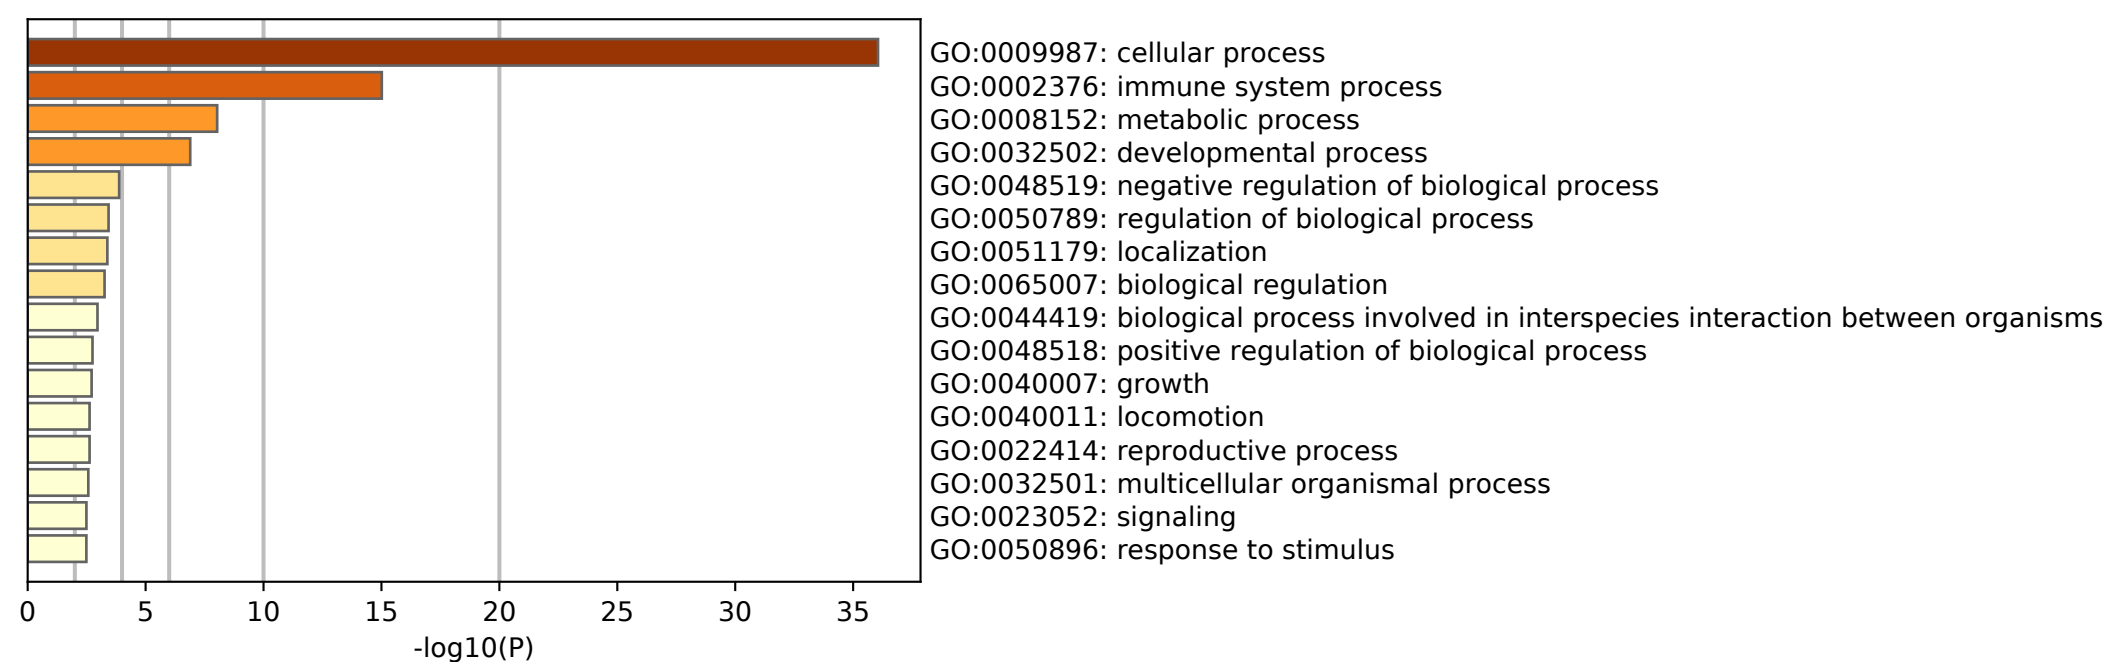

Supplement: table2-data1 [file HeatmapSelectedGOParent.pdf › Enrichment_heatmap/HeatmapSelectedGOParent.pdf]

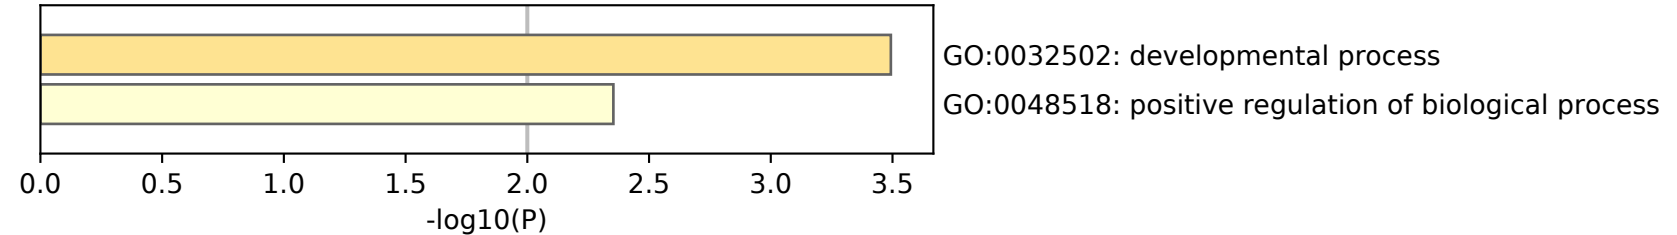

Supplement: table2-data1 [file HeatmapSelectedGOParent.pdf › Enrichment_heatmap/HeatmapSelectedGOParent.pdf]

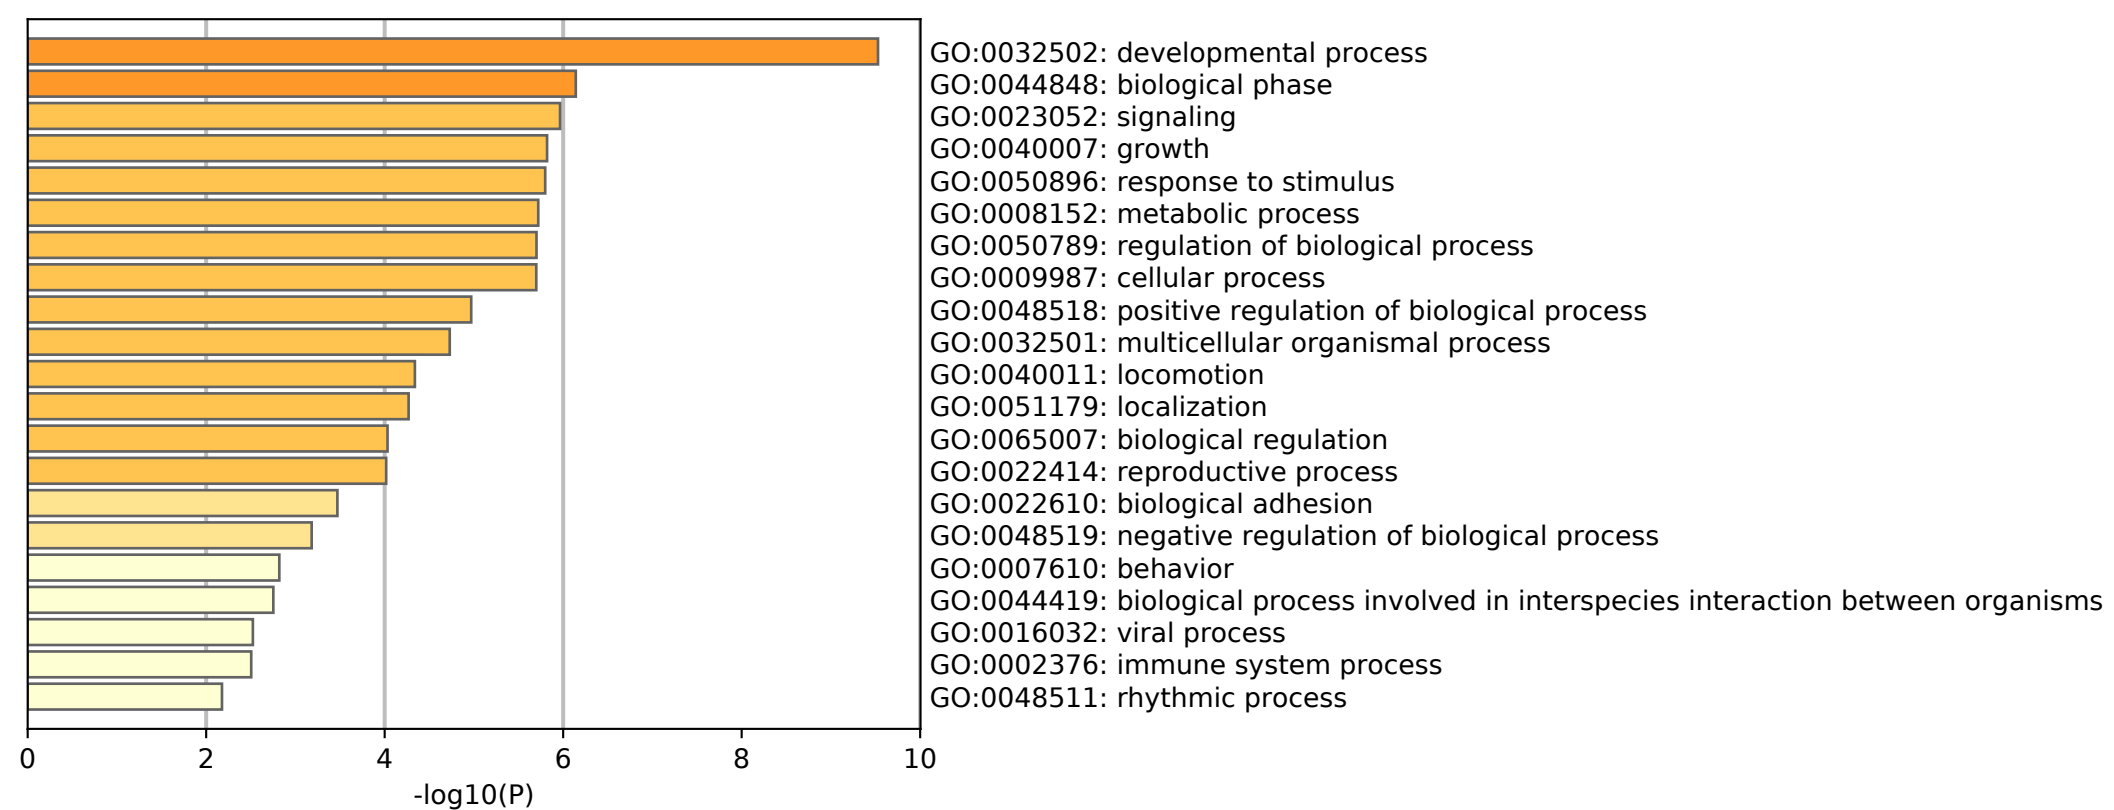

Supplement: table2-data1 [file HeatmapSelectedGOParent.pdf › Enrichment_heatmap/HeatmapSelectedGOParent.pdf]

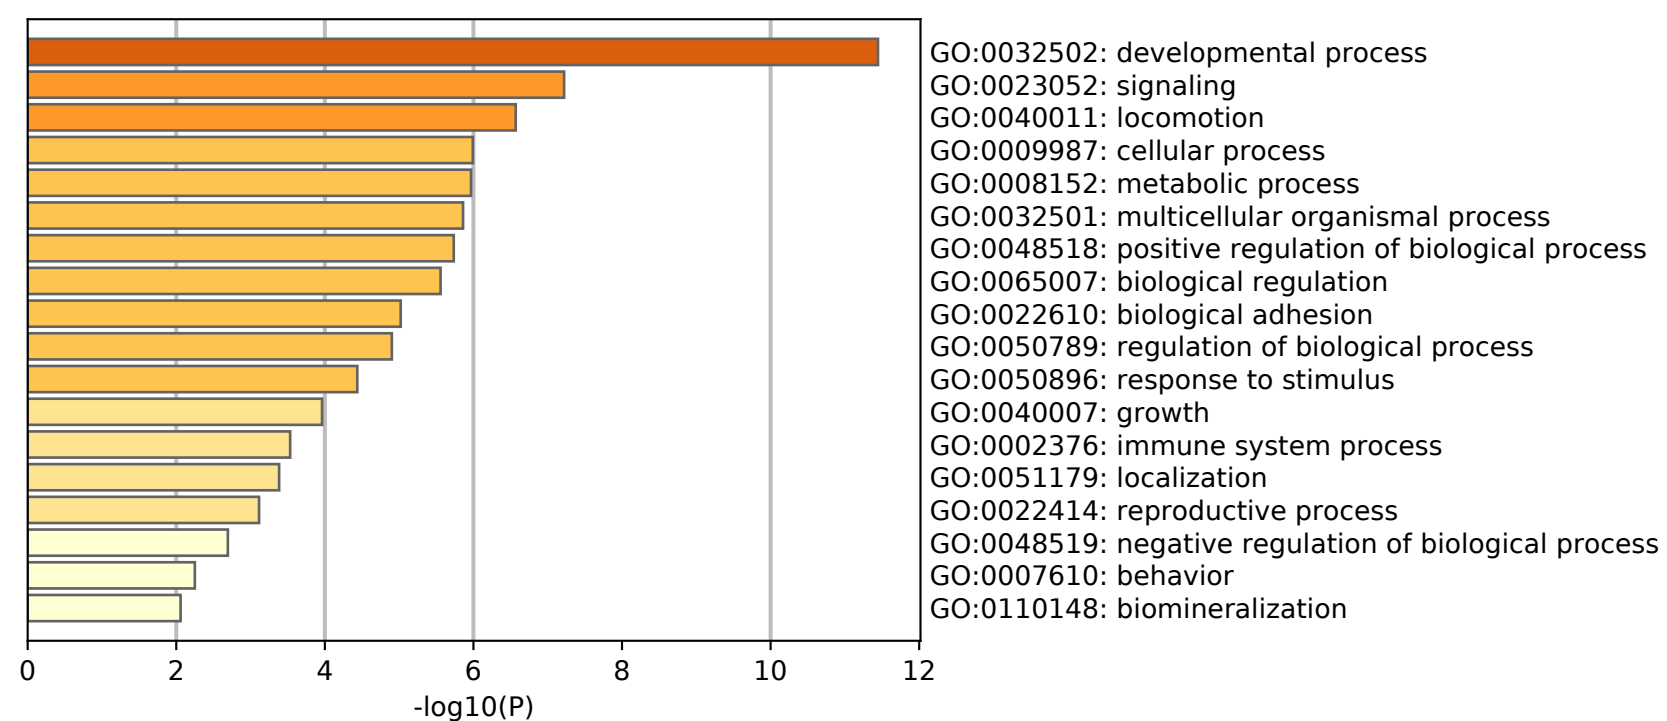

Supplement: table2-data1 [file HeatmapSelectedGOParent.pdf › Enrichment_heatmap/HeatmapSelectedGOParent.pdf]

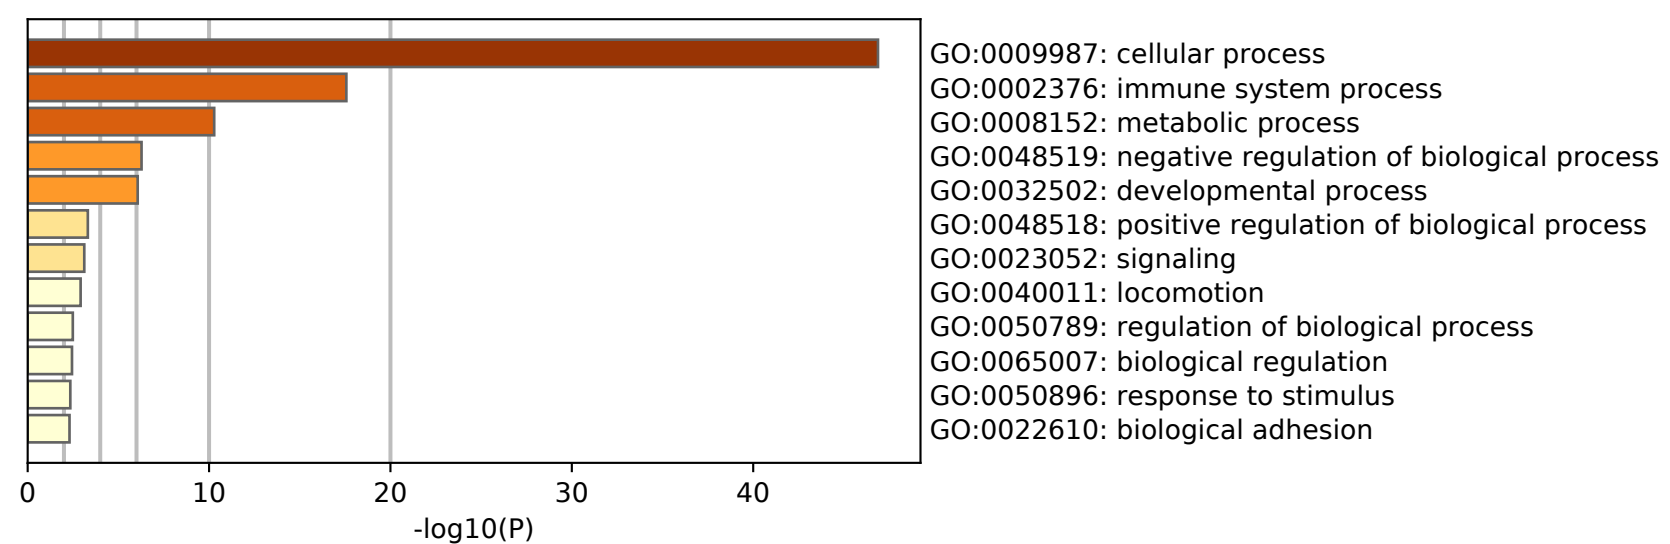

Supplement: table2-data1 [file HeatmapSelectedGOParent.pdf › Enrichment_heatmap/HeatmapSelectedGOParent.pdf]

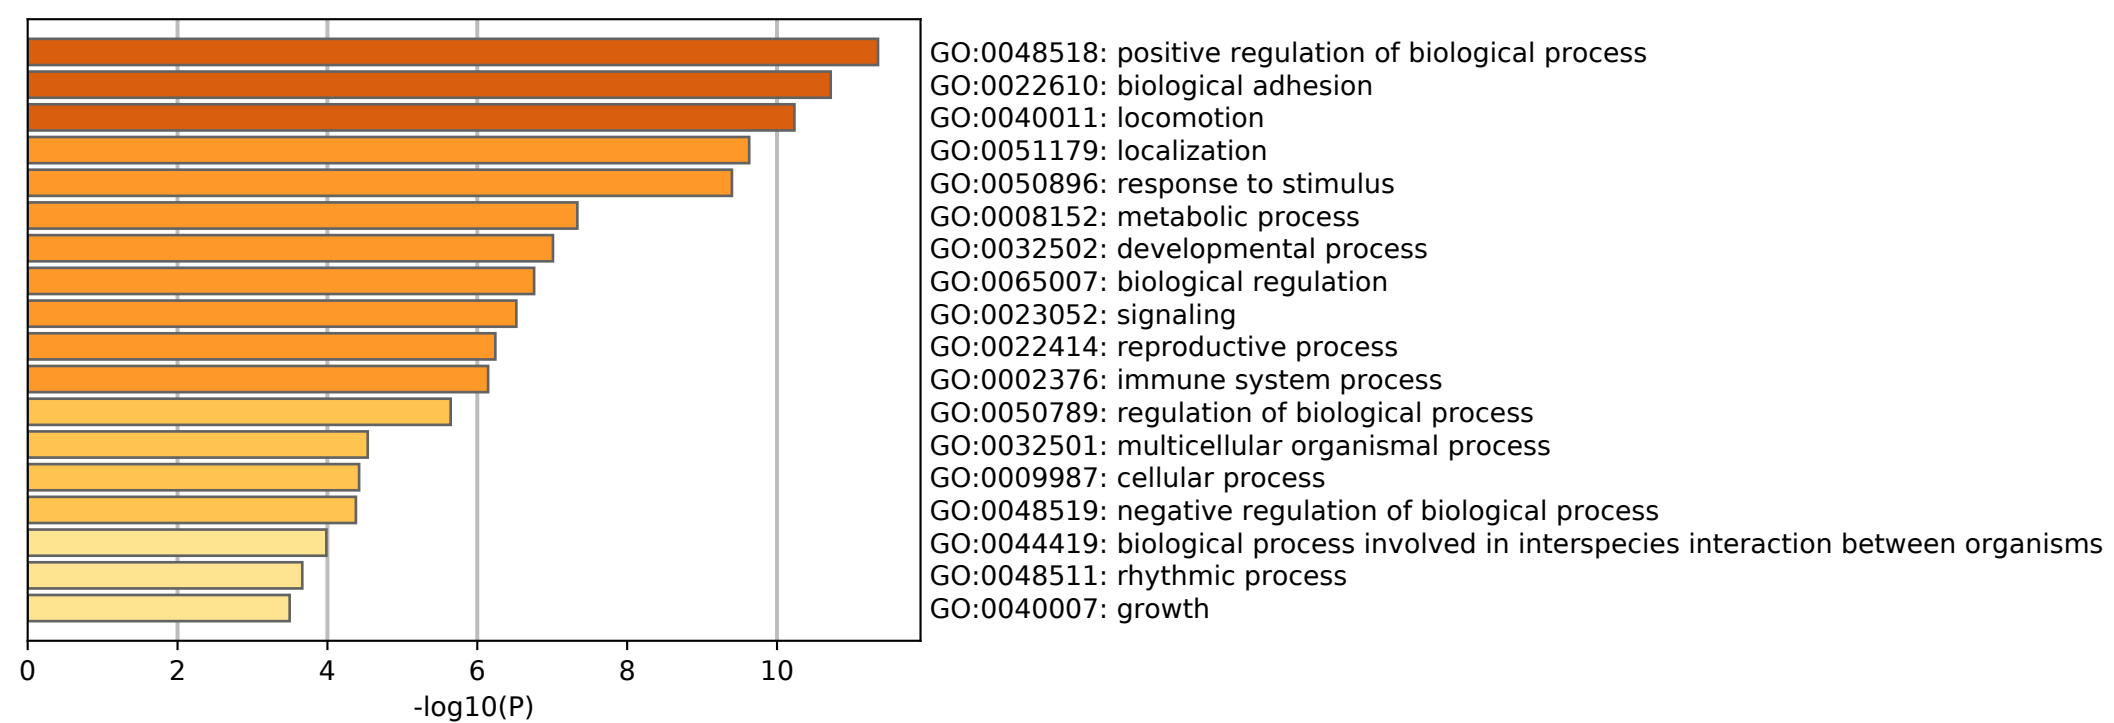

Supplement: table2-data1 [file HeatmapSelectedGOParent.pdf › Enrichment_heatmap/HeatmapSelectedGOParent.pdf]

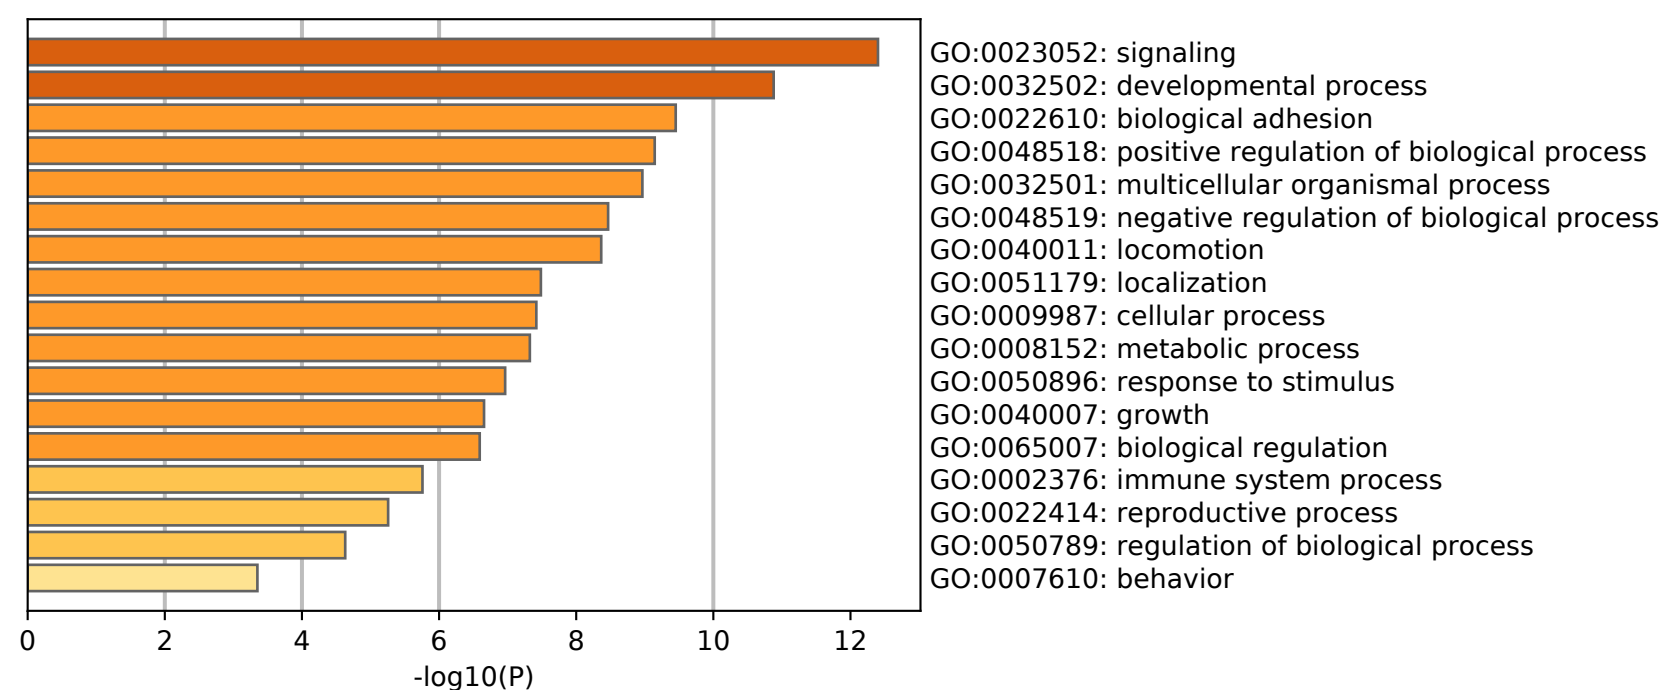

Supplement: table2-data1 [file HeatmapSelectedGOParent.pdf › Enrichment_heatmap/HeatmapSelectedGOParent.pdf]

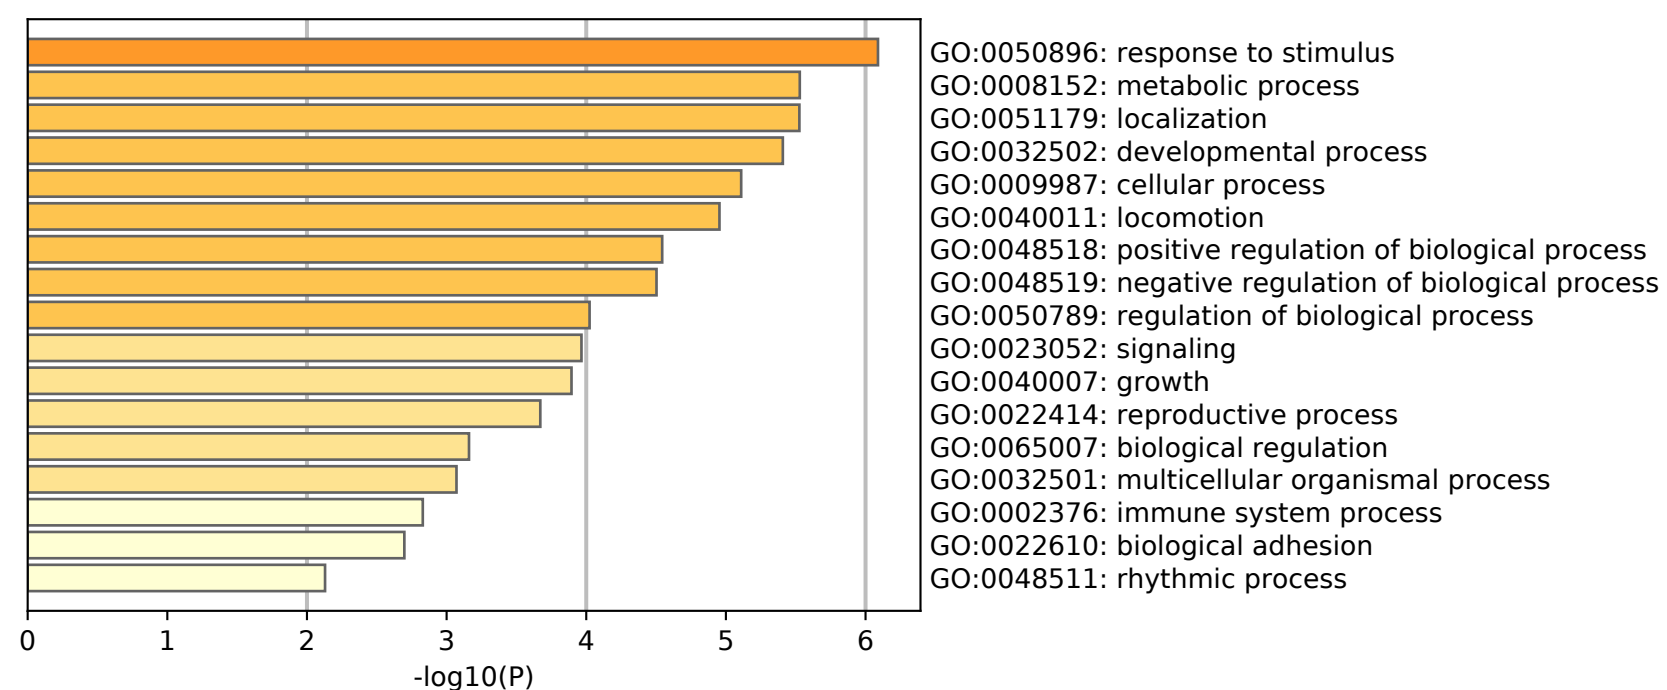

Supplement: table2-data1 [file HeatmapSelectedGOParent.pdf › Enrichment_heatmap/HeatmapSelectedGOParent.pdf]

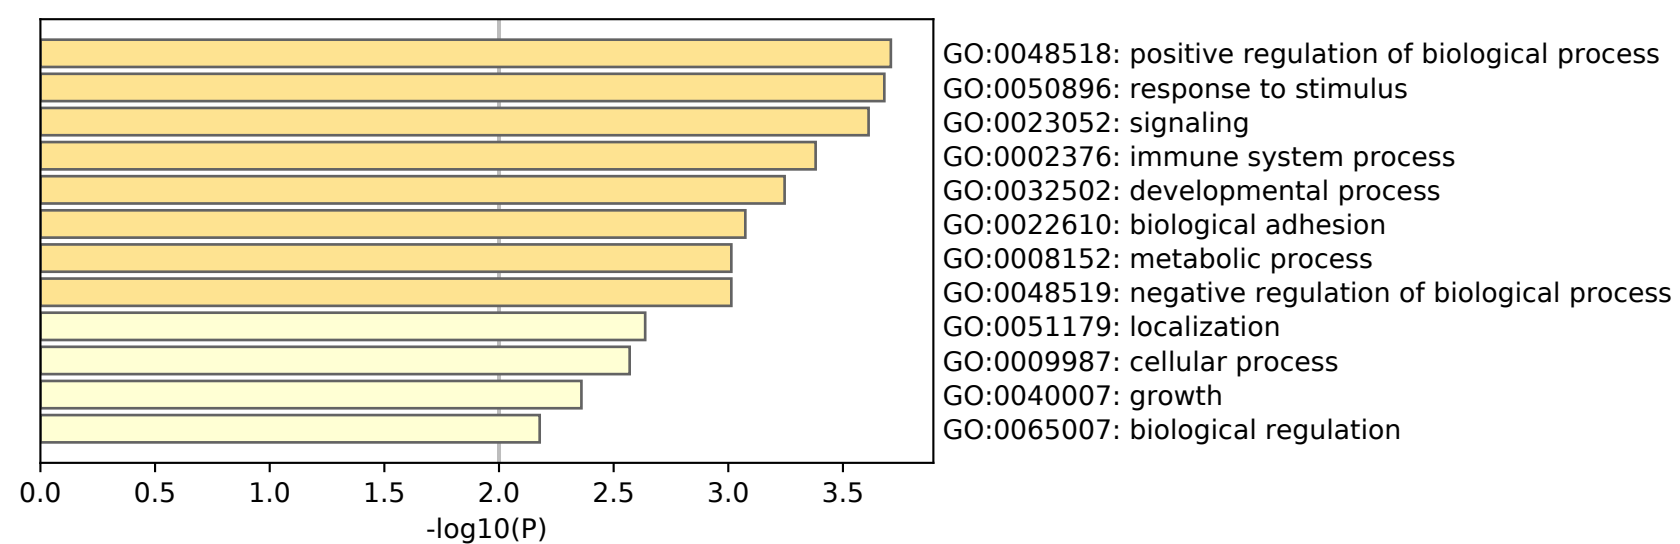

Supplement: table2-data1 [file HeatmapSelectedGOParent.pdf › Enrichment_heatmap/HeatmapSelectedGOParent.pdf]

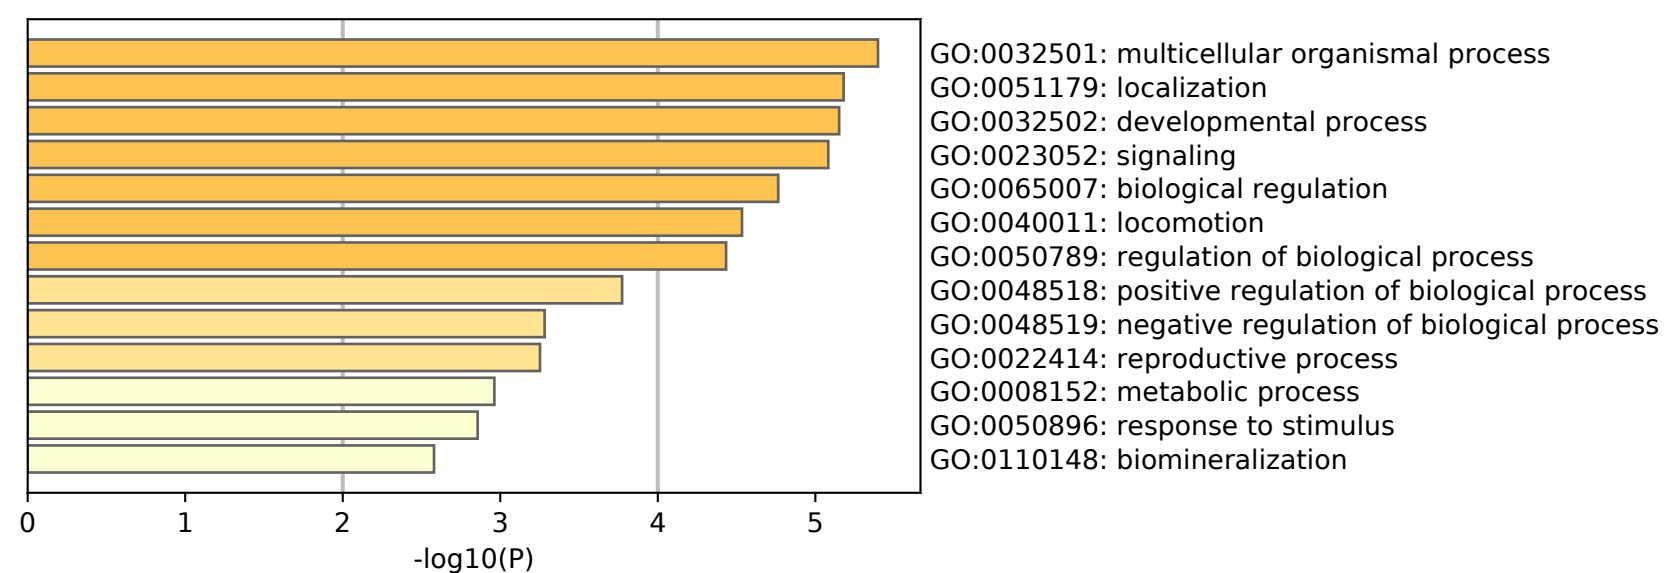

Supplement: table2-data1 [file HeatmapSelectedGOParent.pdf › Enrichment_heatmap/HeatmapSelectedGOParent.pdf]

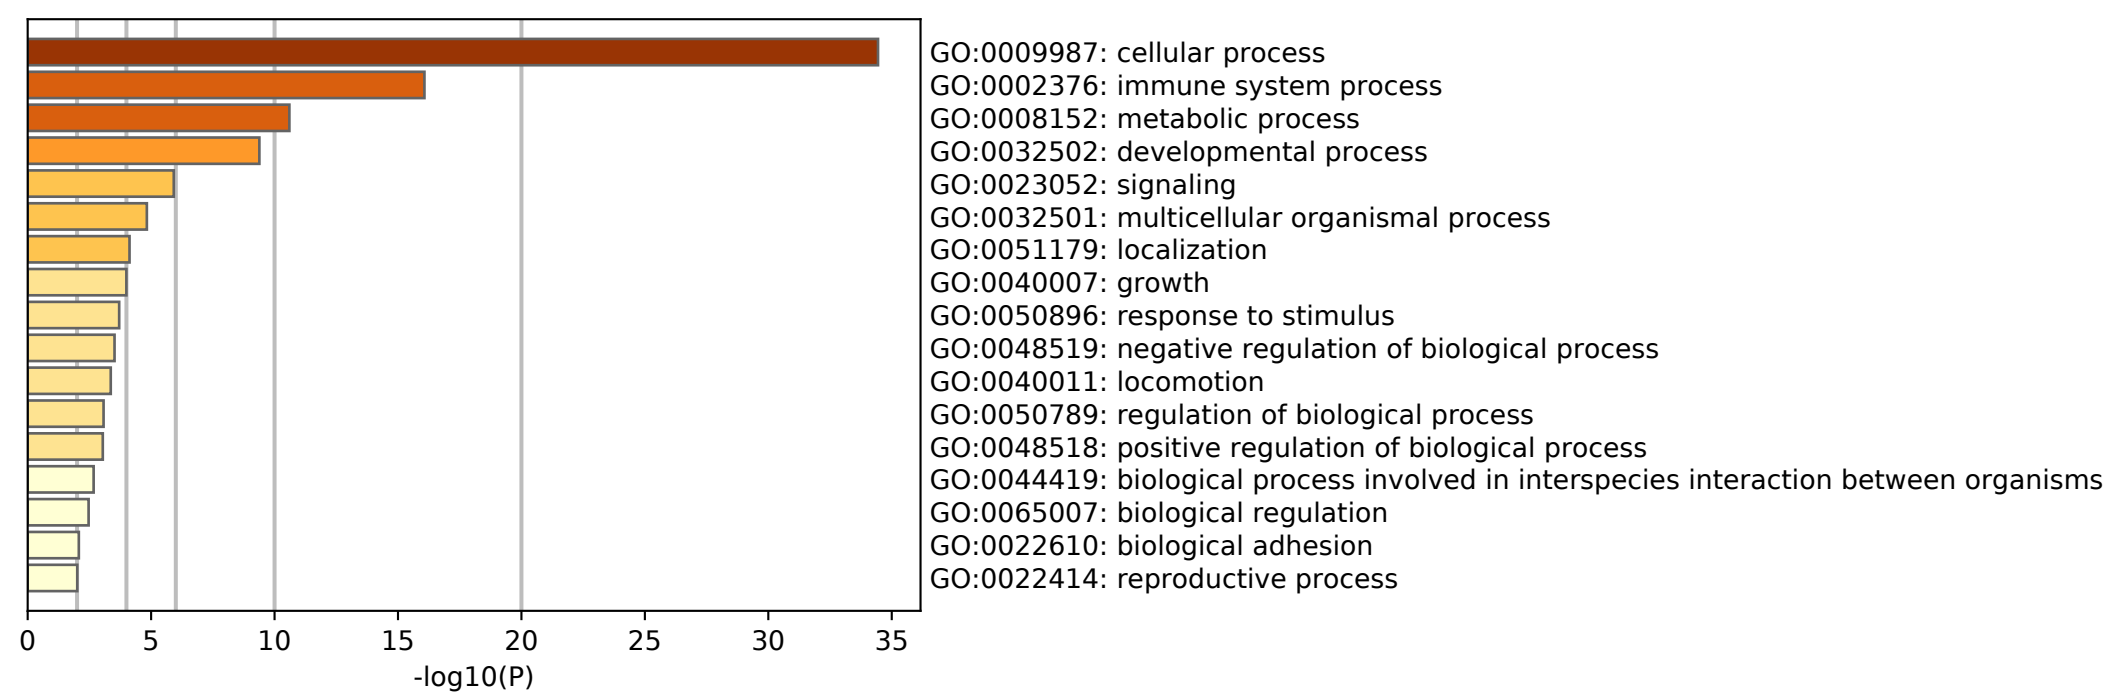

Supplement: table2-data1 [file HeatmapSelectedGOParent.pdf › Enrichment_heatmap/HeatmapSelectedGOParent.pdf]

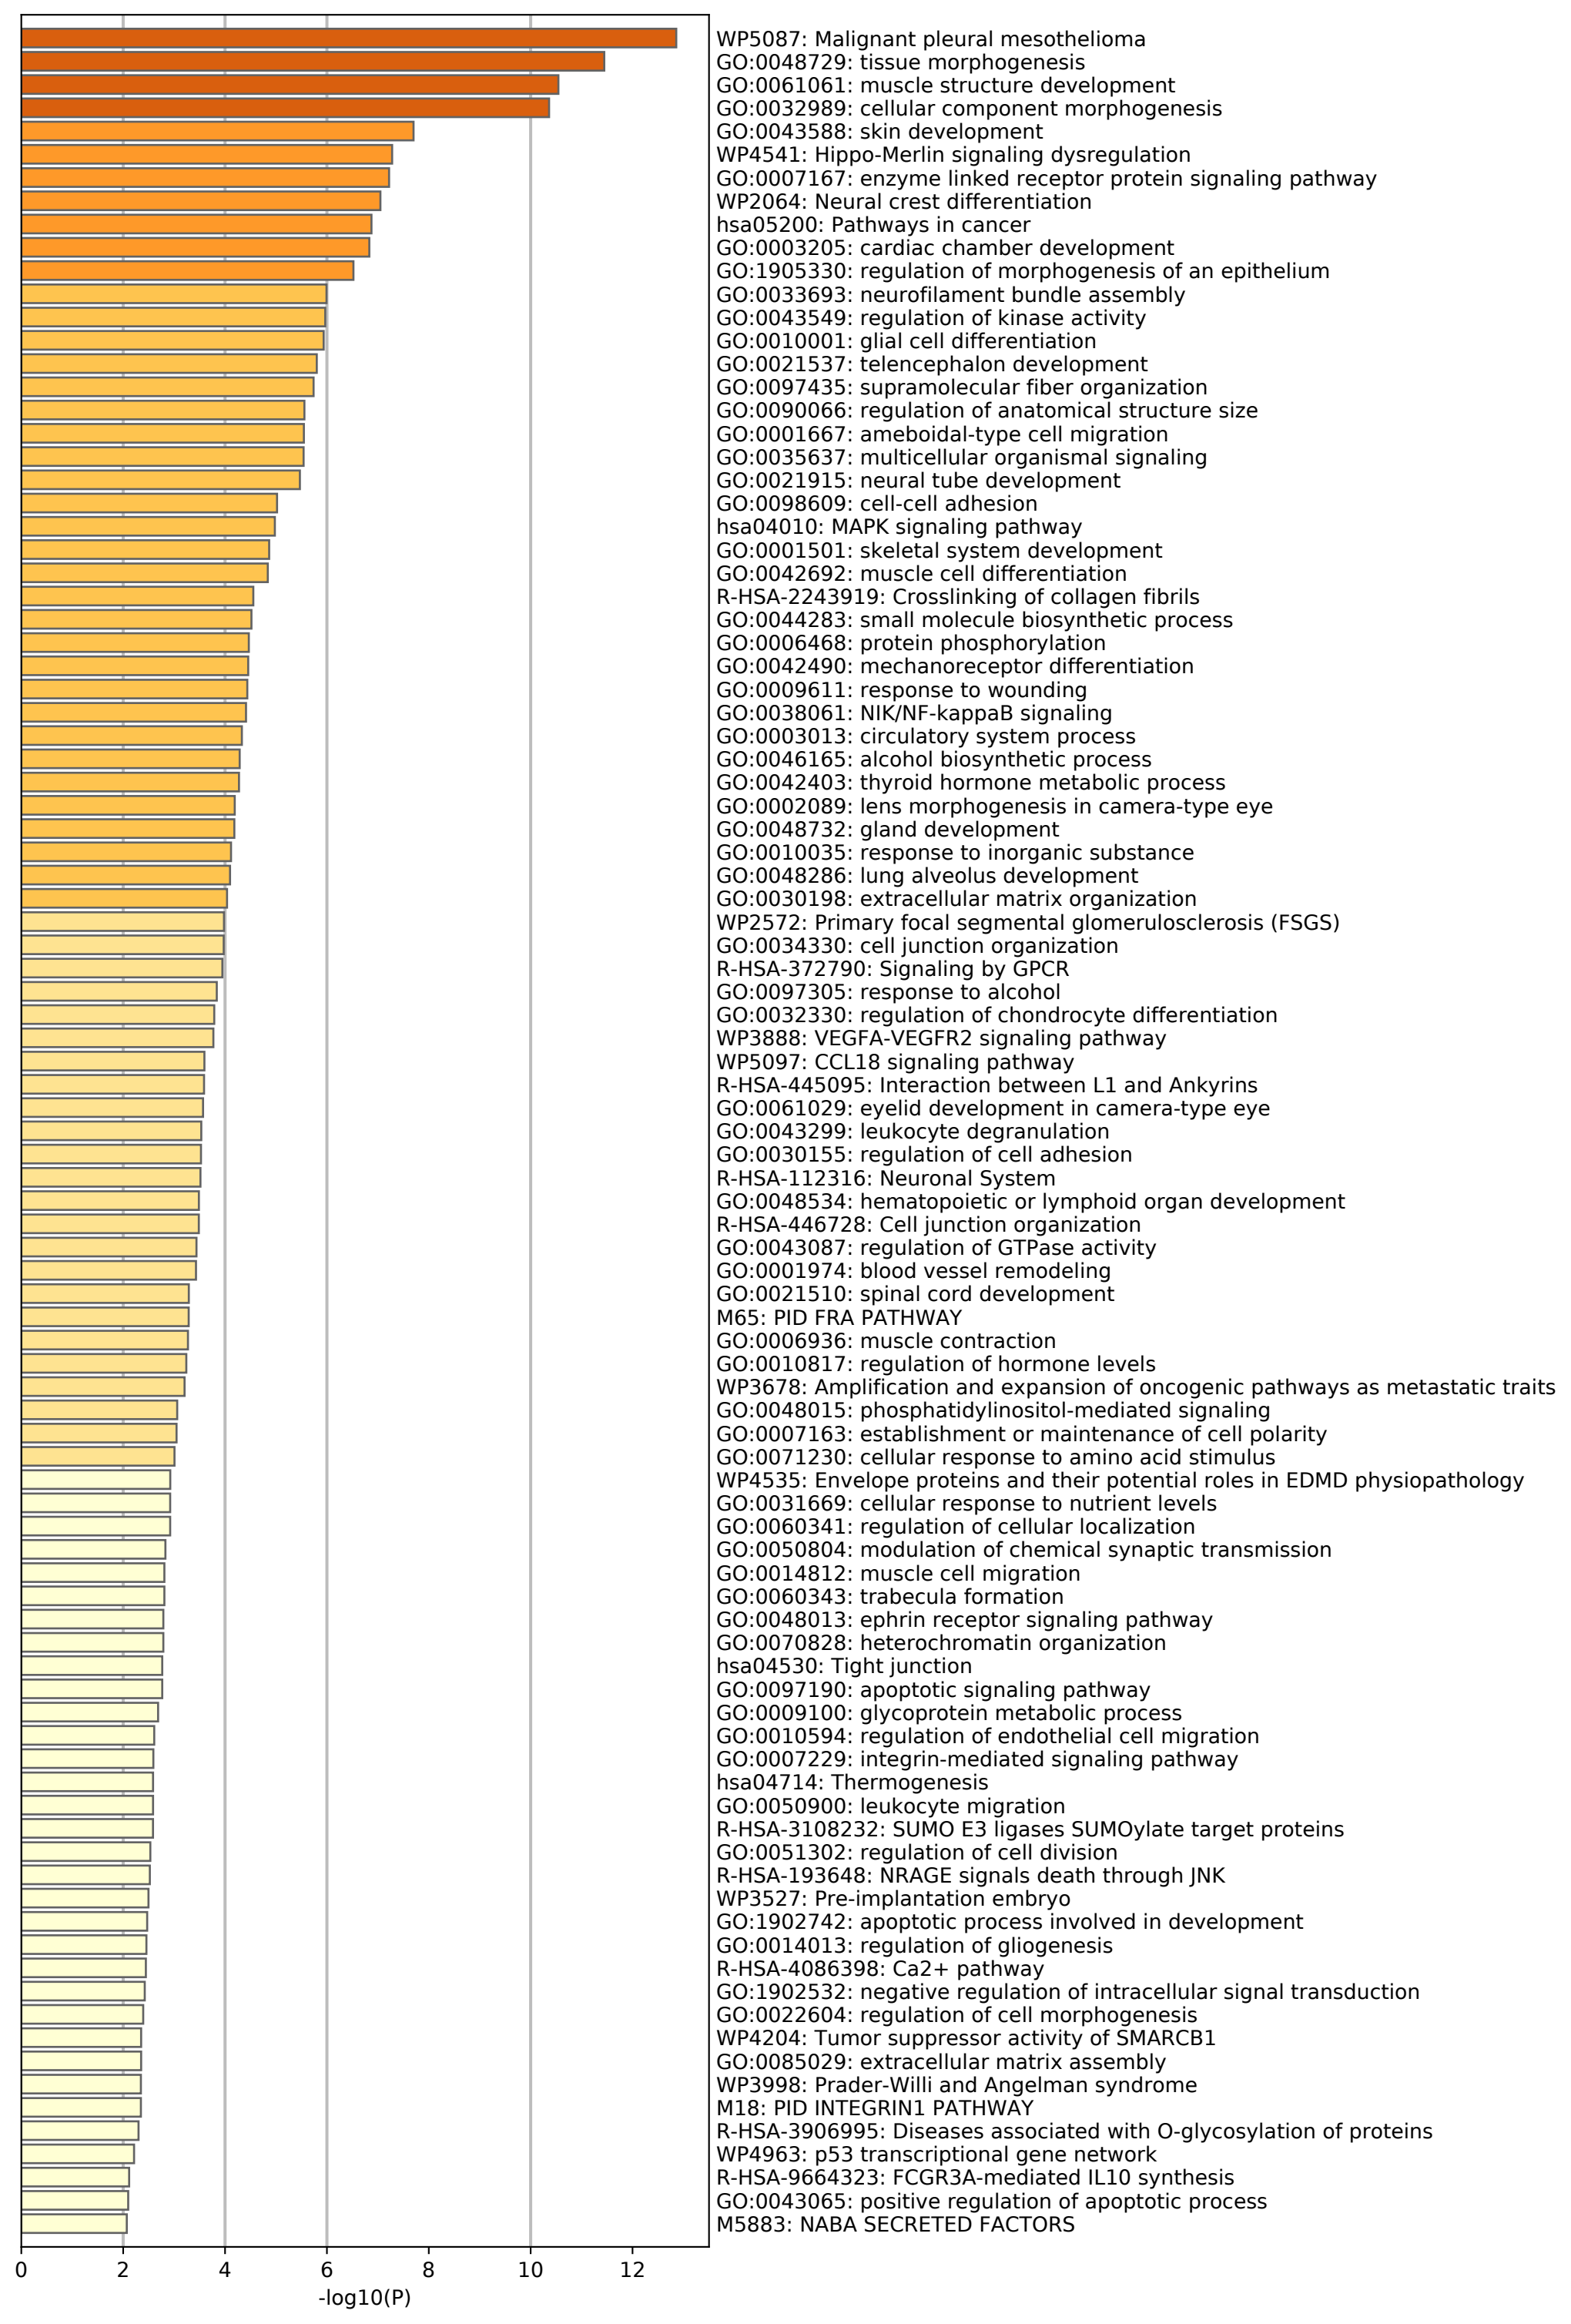

Supplement: table2-data1 [file HeatmapSelectedGOTop100.pdf › Enrichment_heatmap/HeatmapSelectedGOTop100.pdf]

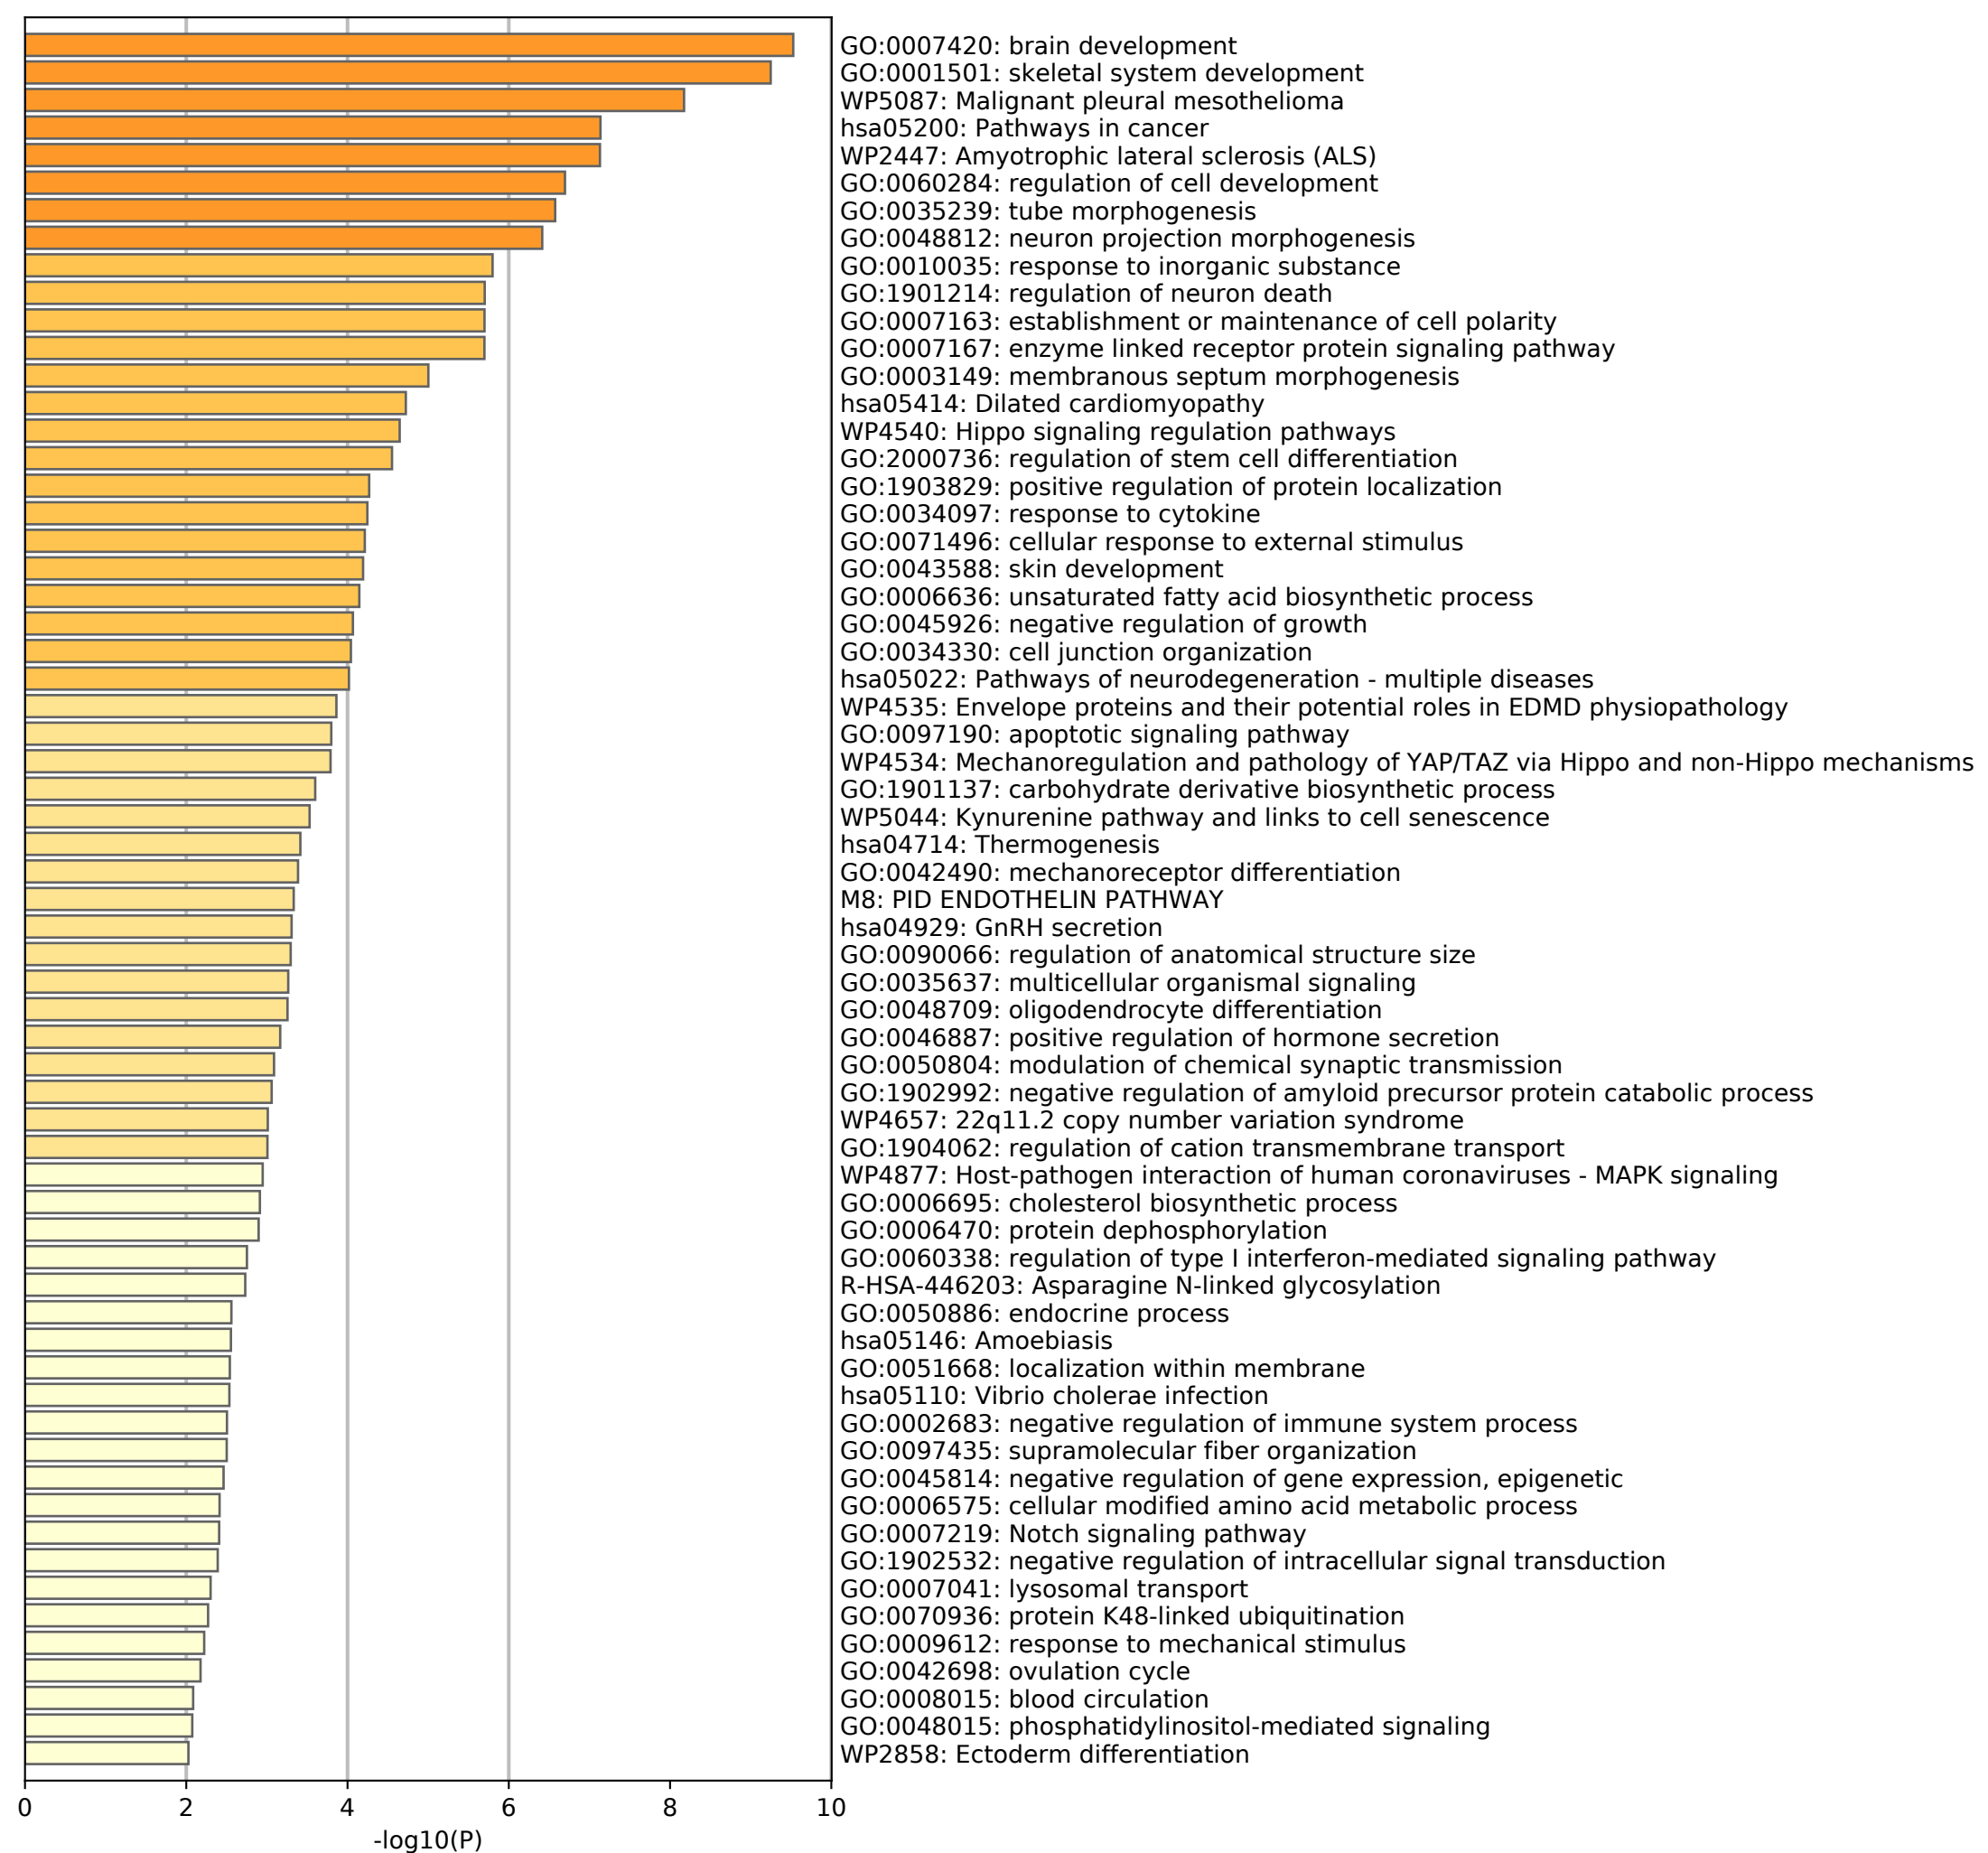

Supplement: table2-data1 [file HeatmapSelectedGOTop100.pdf › Enrichment_heatmap/HeatmapSelectedGOTop100.pdf]

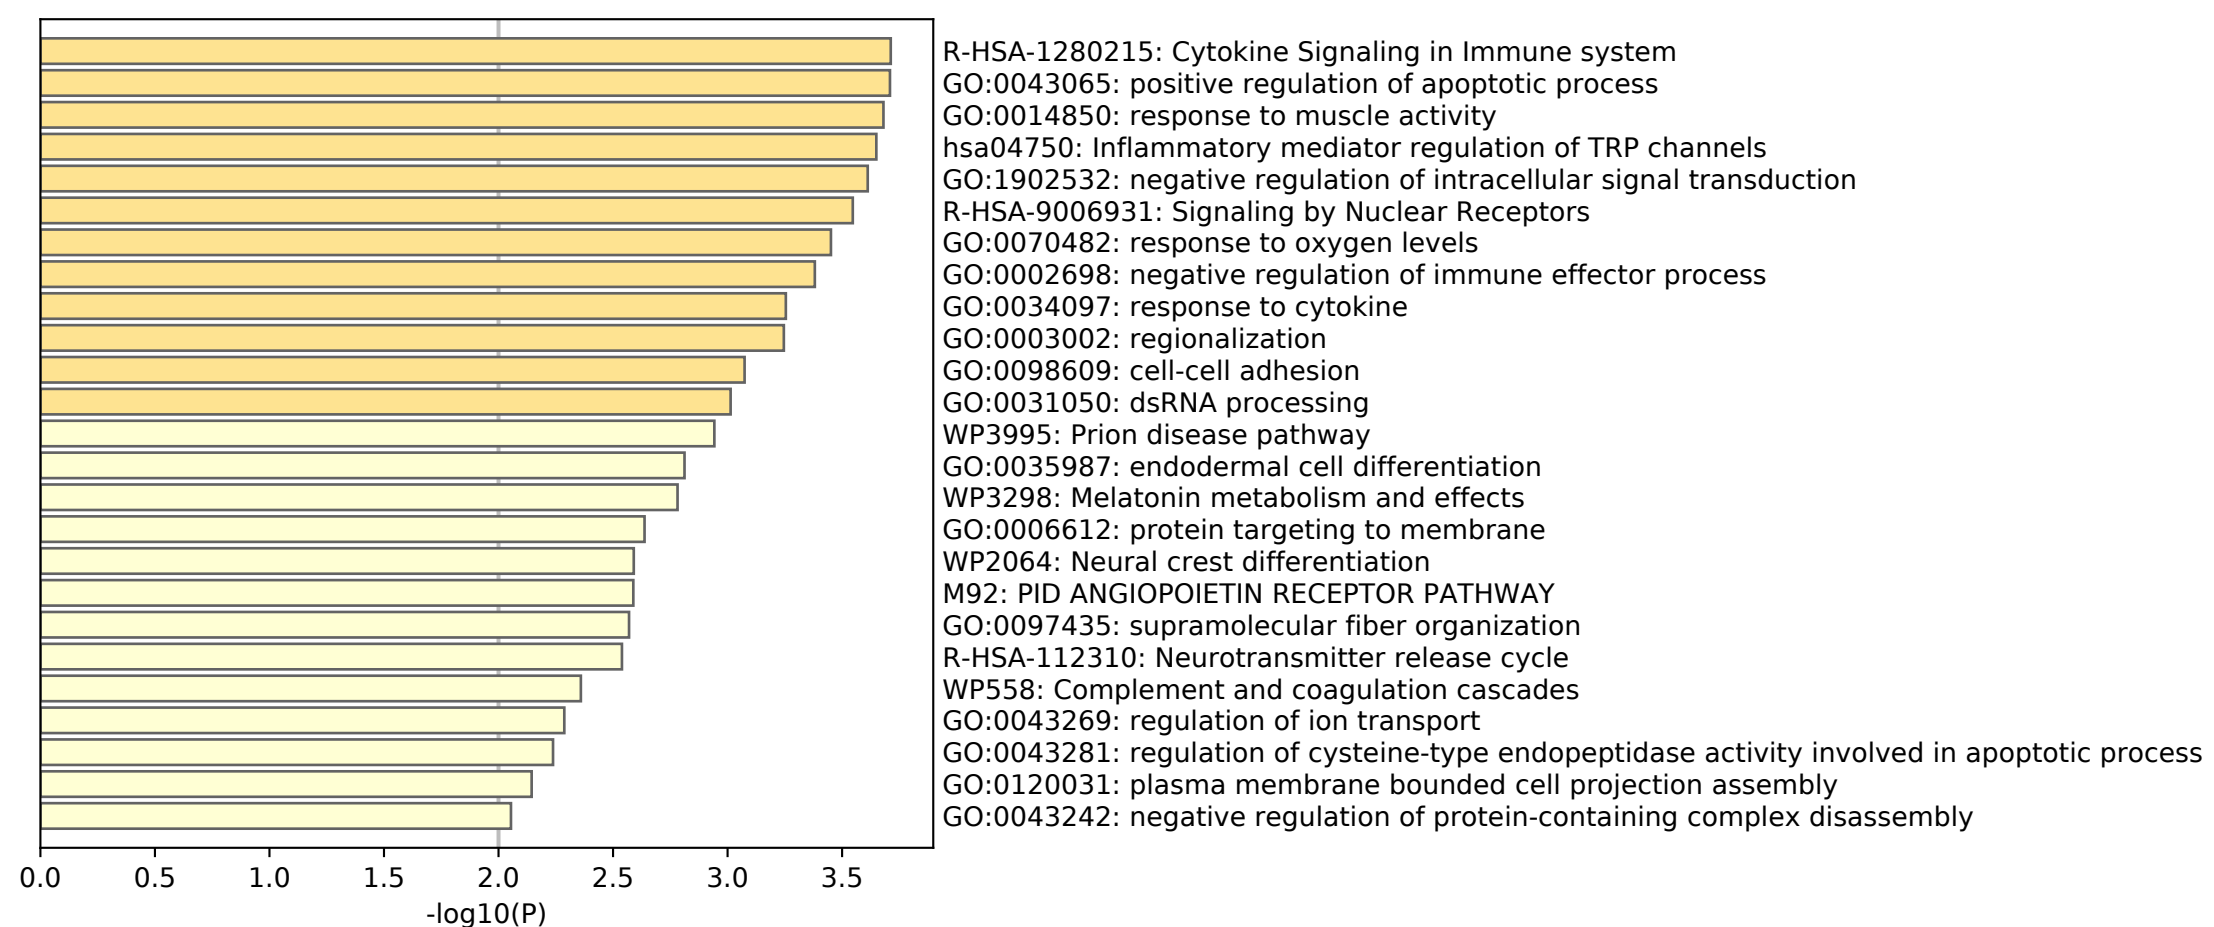

Supplement: table2-data1 [file HeatmapSelectedGOTop100.pdf › Enrichment_heatmap/HeatmapSelectedGOTop100.pdf]

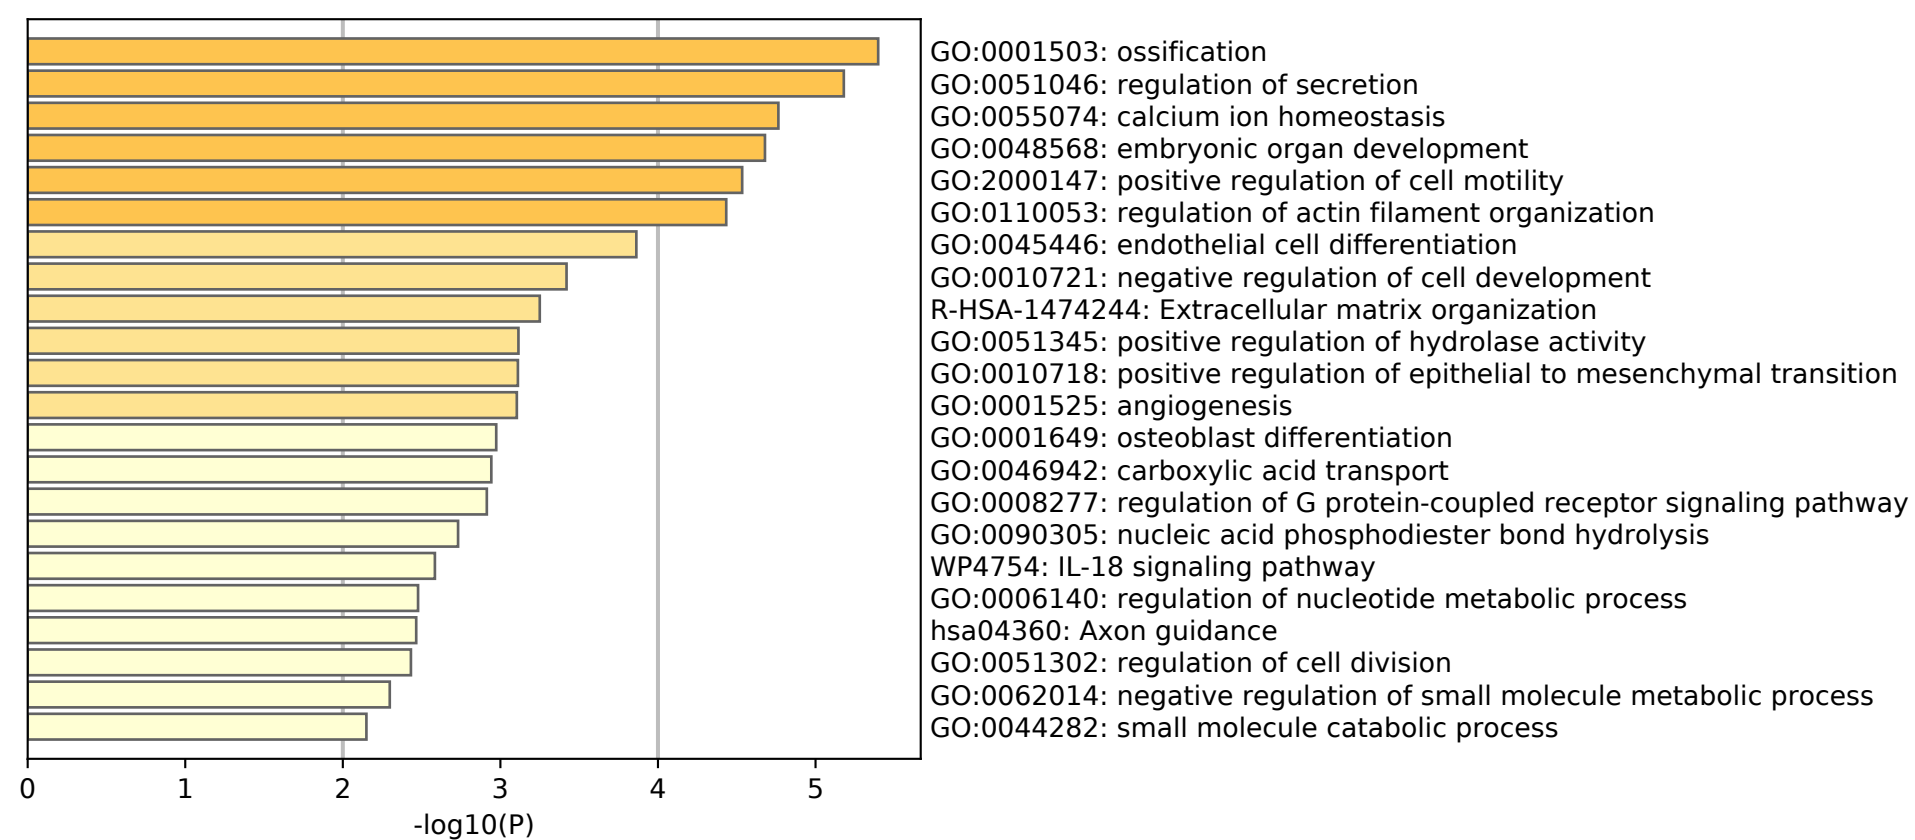

Supplement: table2-data1 [file HeatmapSelectedGOTop100.pdf › Enrichment_heatmap/HeatmapSelectedGOTop100.pdf]

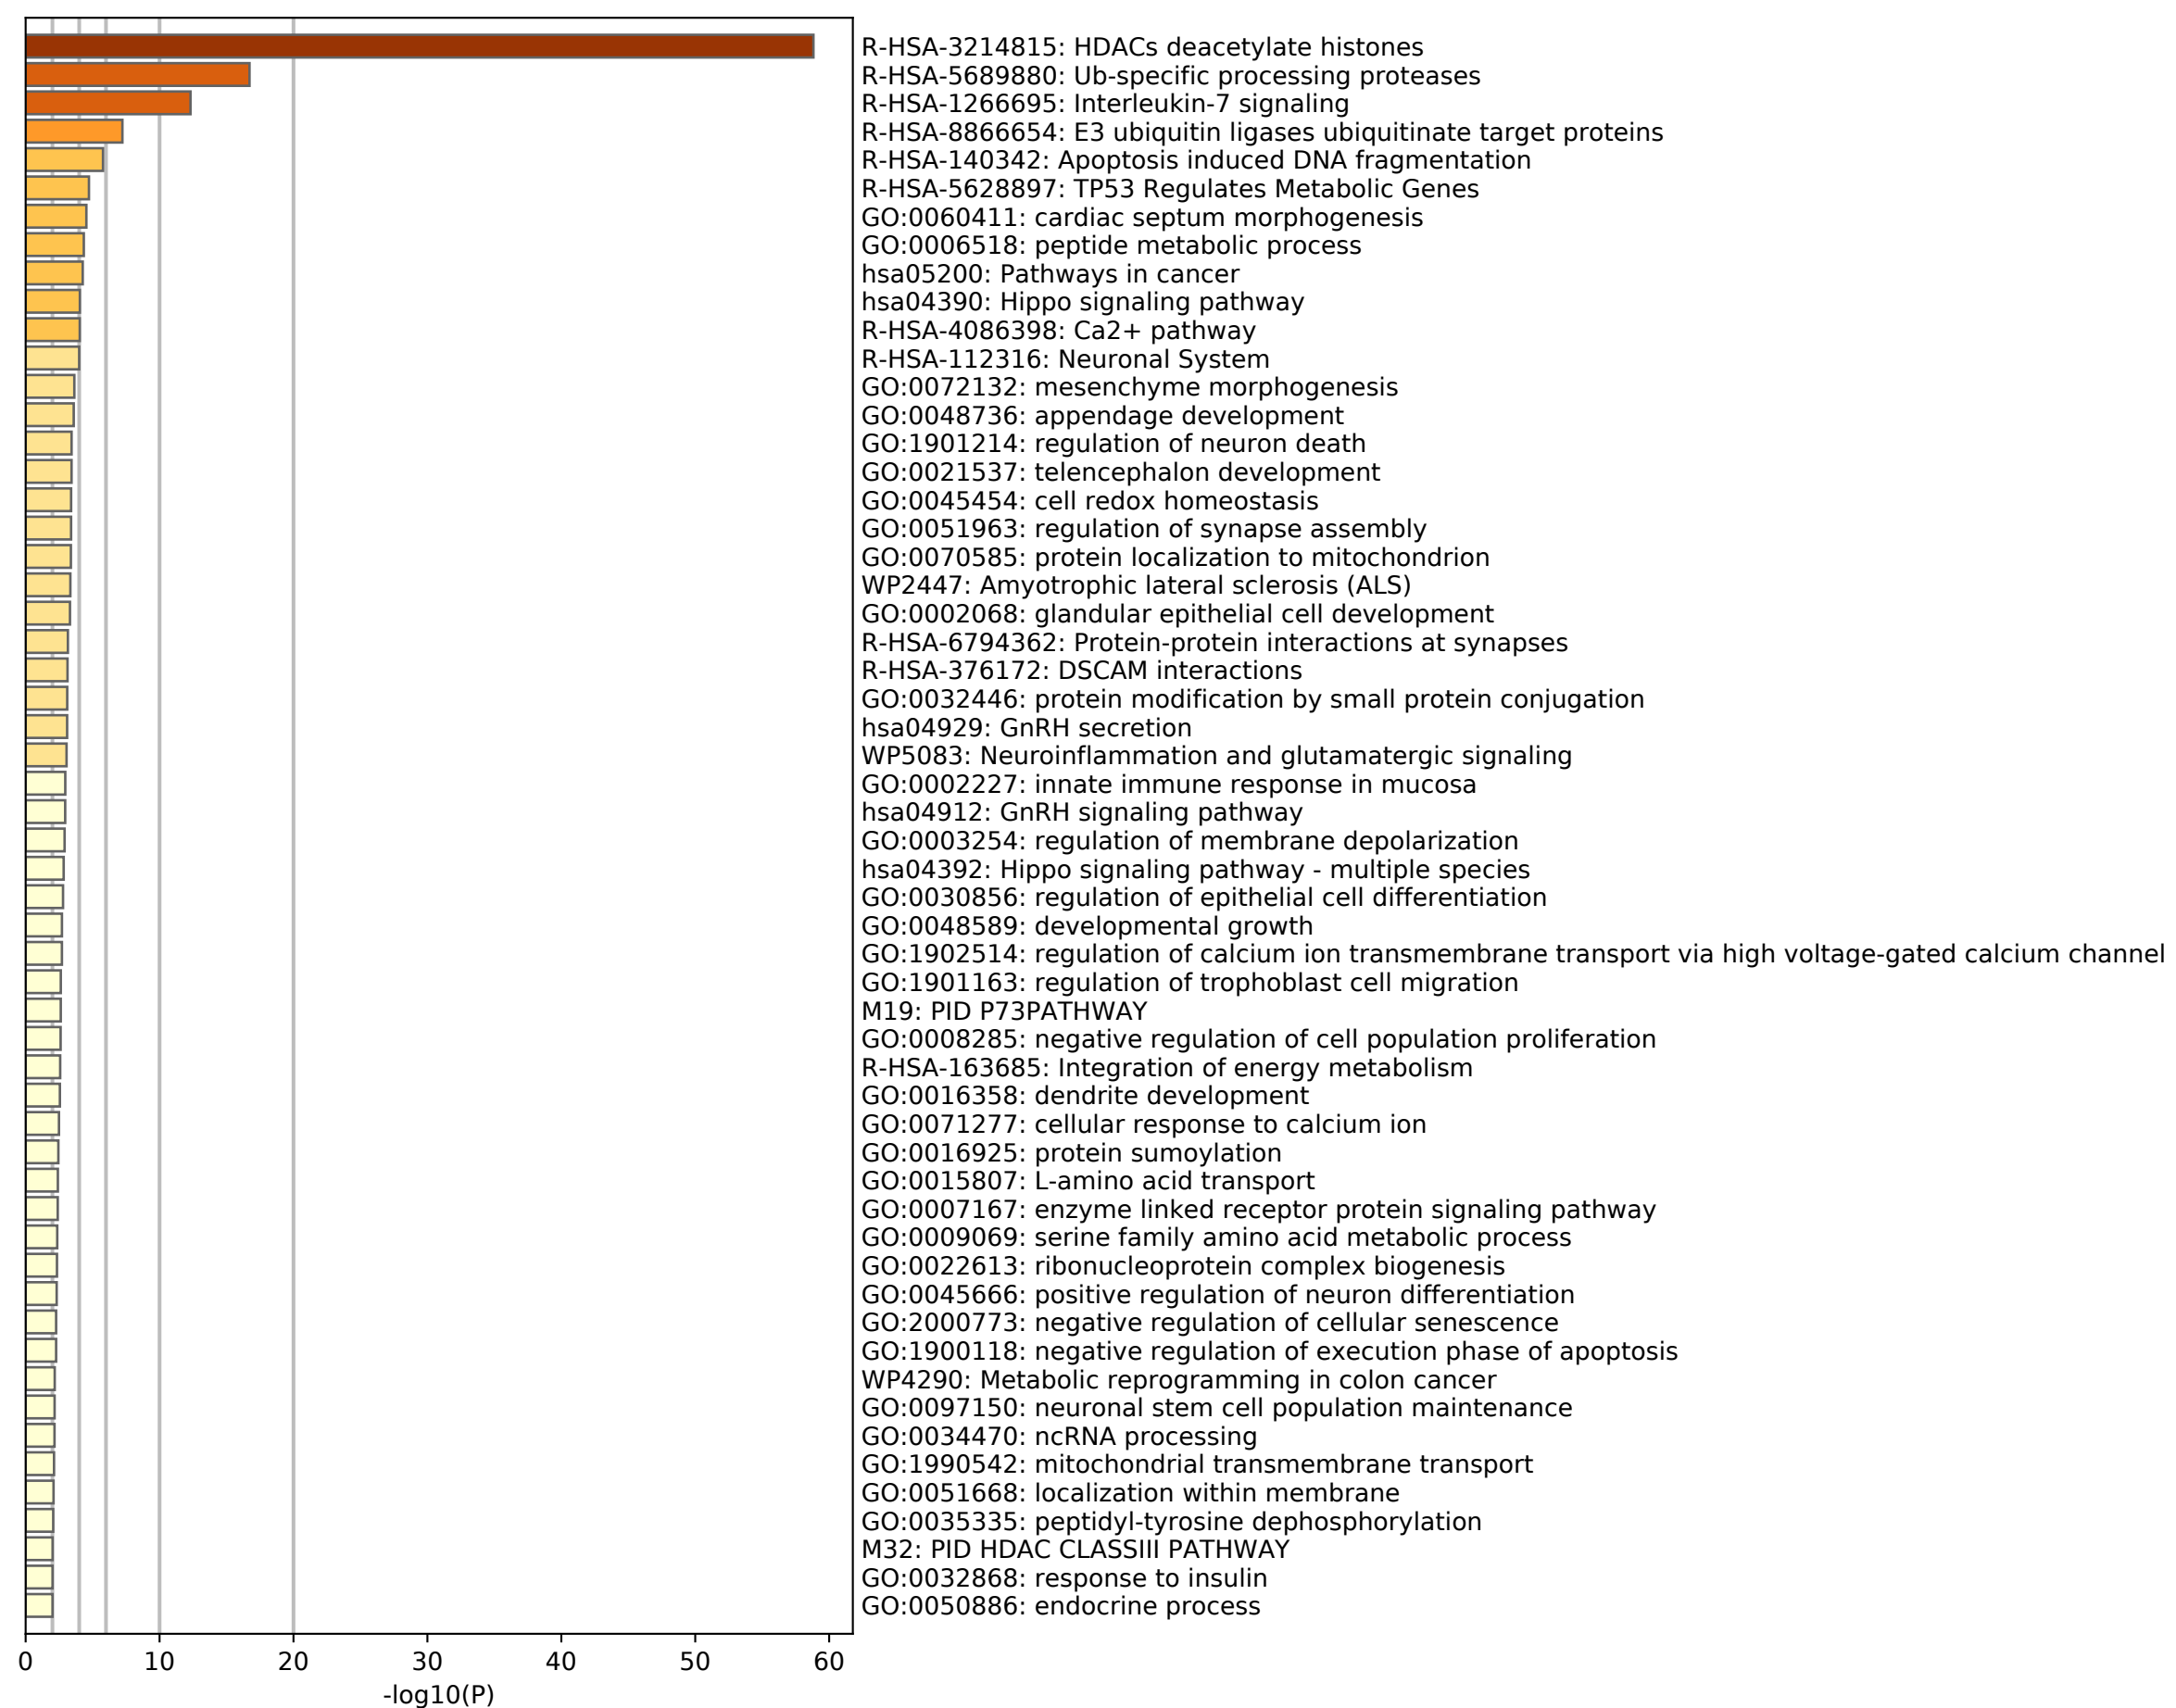

Supplement: table2-data1 [file HeatmapSelectedGOTop100.pdf › Enrichment_heatmap/HeatmapSelectedGOTop100.pdf]

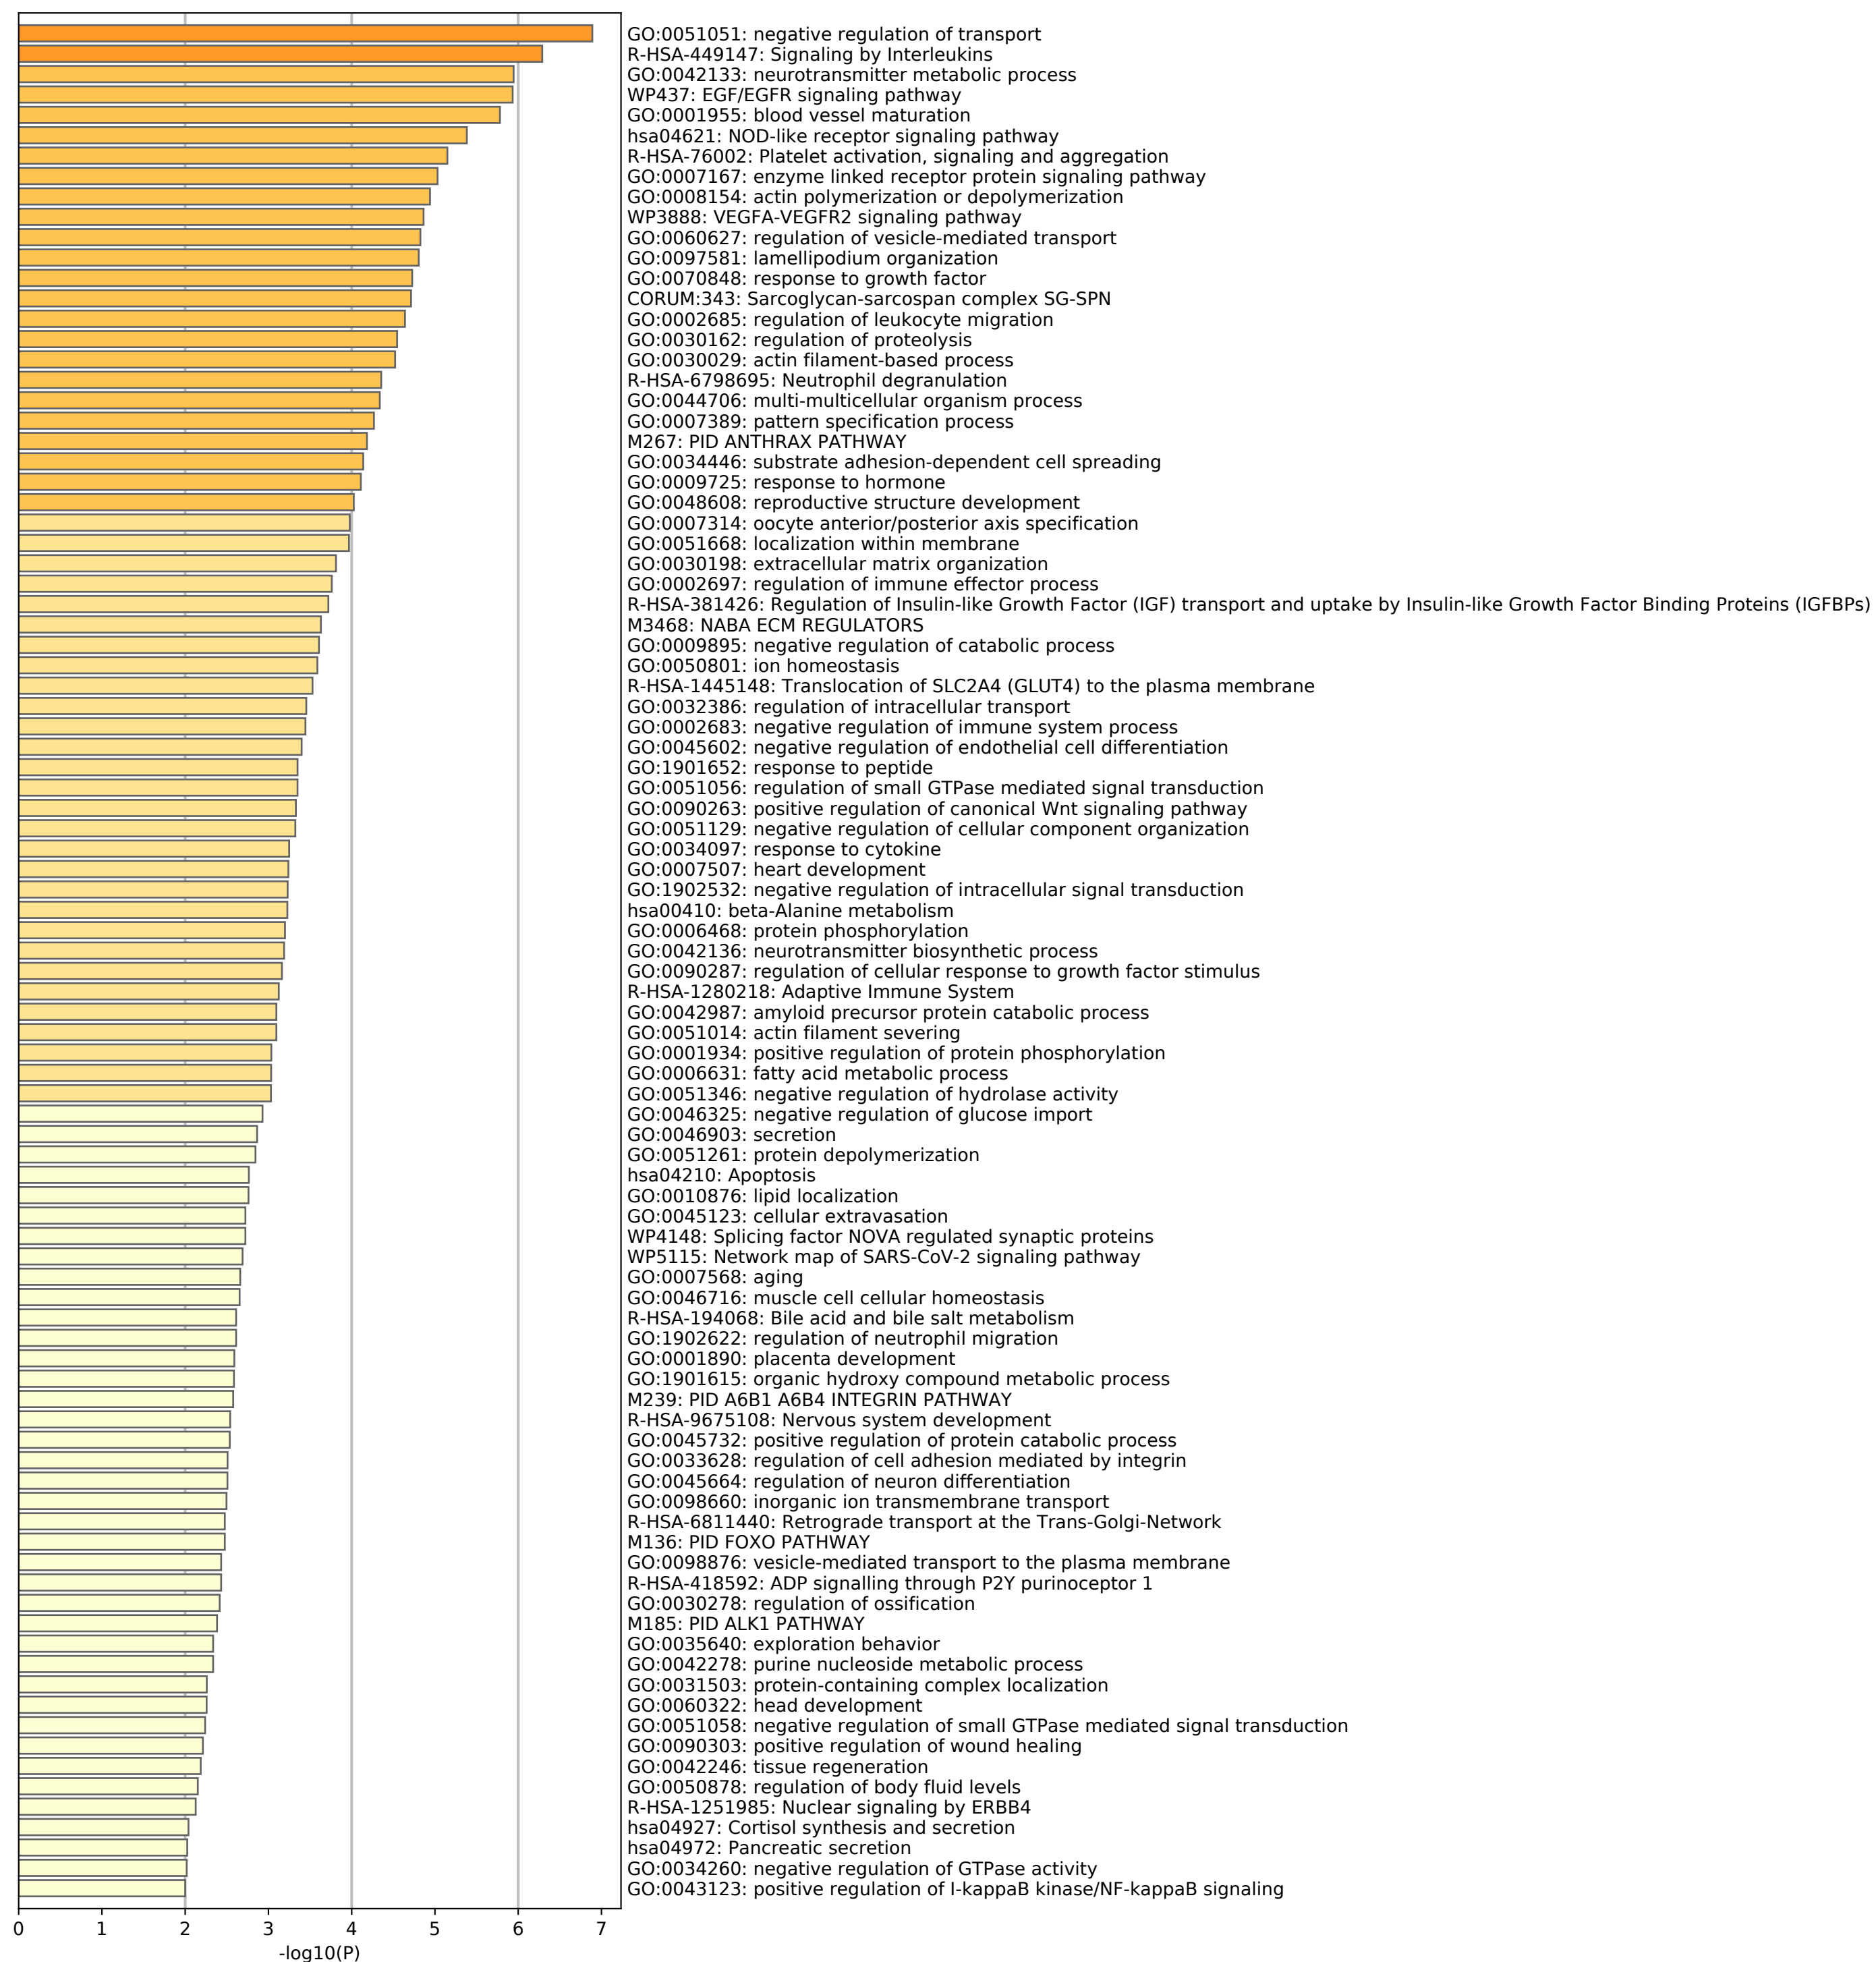

Supplement: table2-data1 [file HeatmapSelectedGOTop100.pdf › Enrichment_heatmap/HeatmapSelectedGOTop100.pdf]

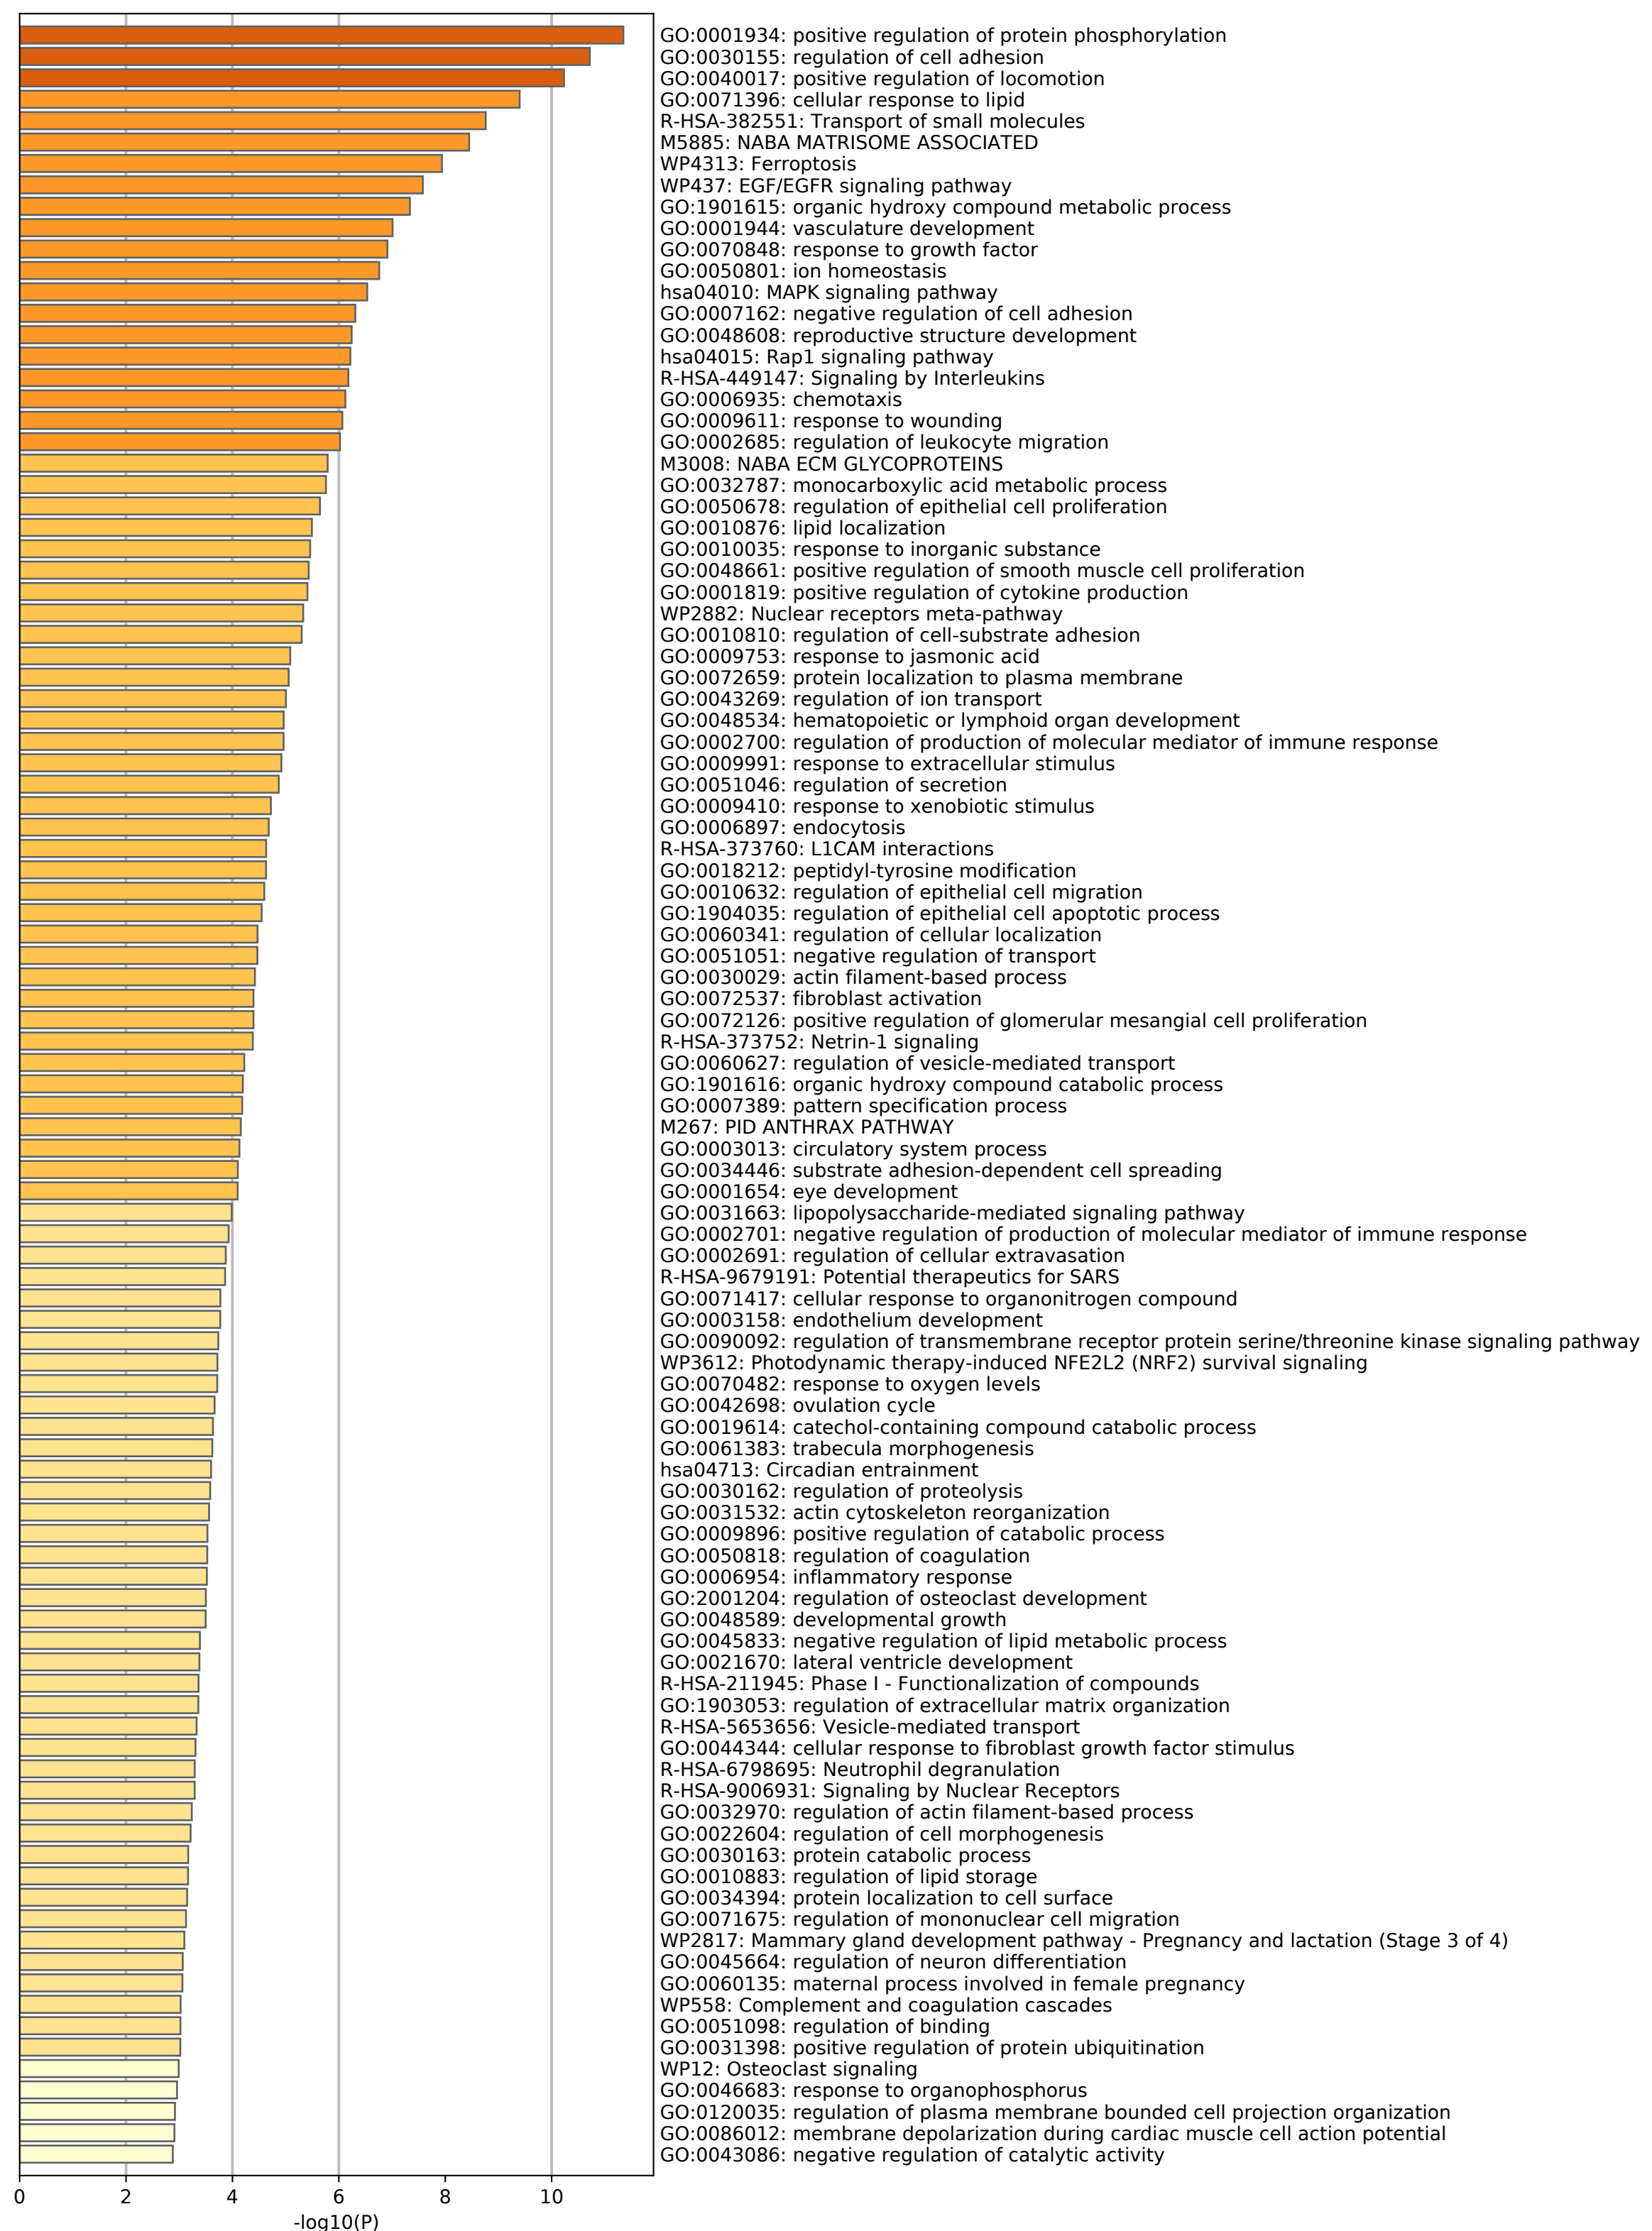

Supplement: table2-data1 [file HeatmapSelectedGOTop100.pdf › Enrichment_heatmap/HeatmapSelectedGOTop100.pdf]

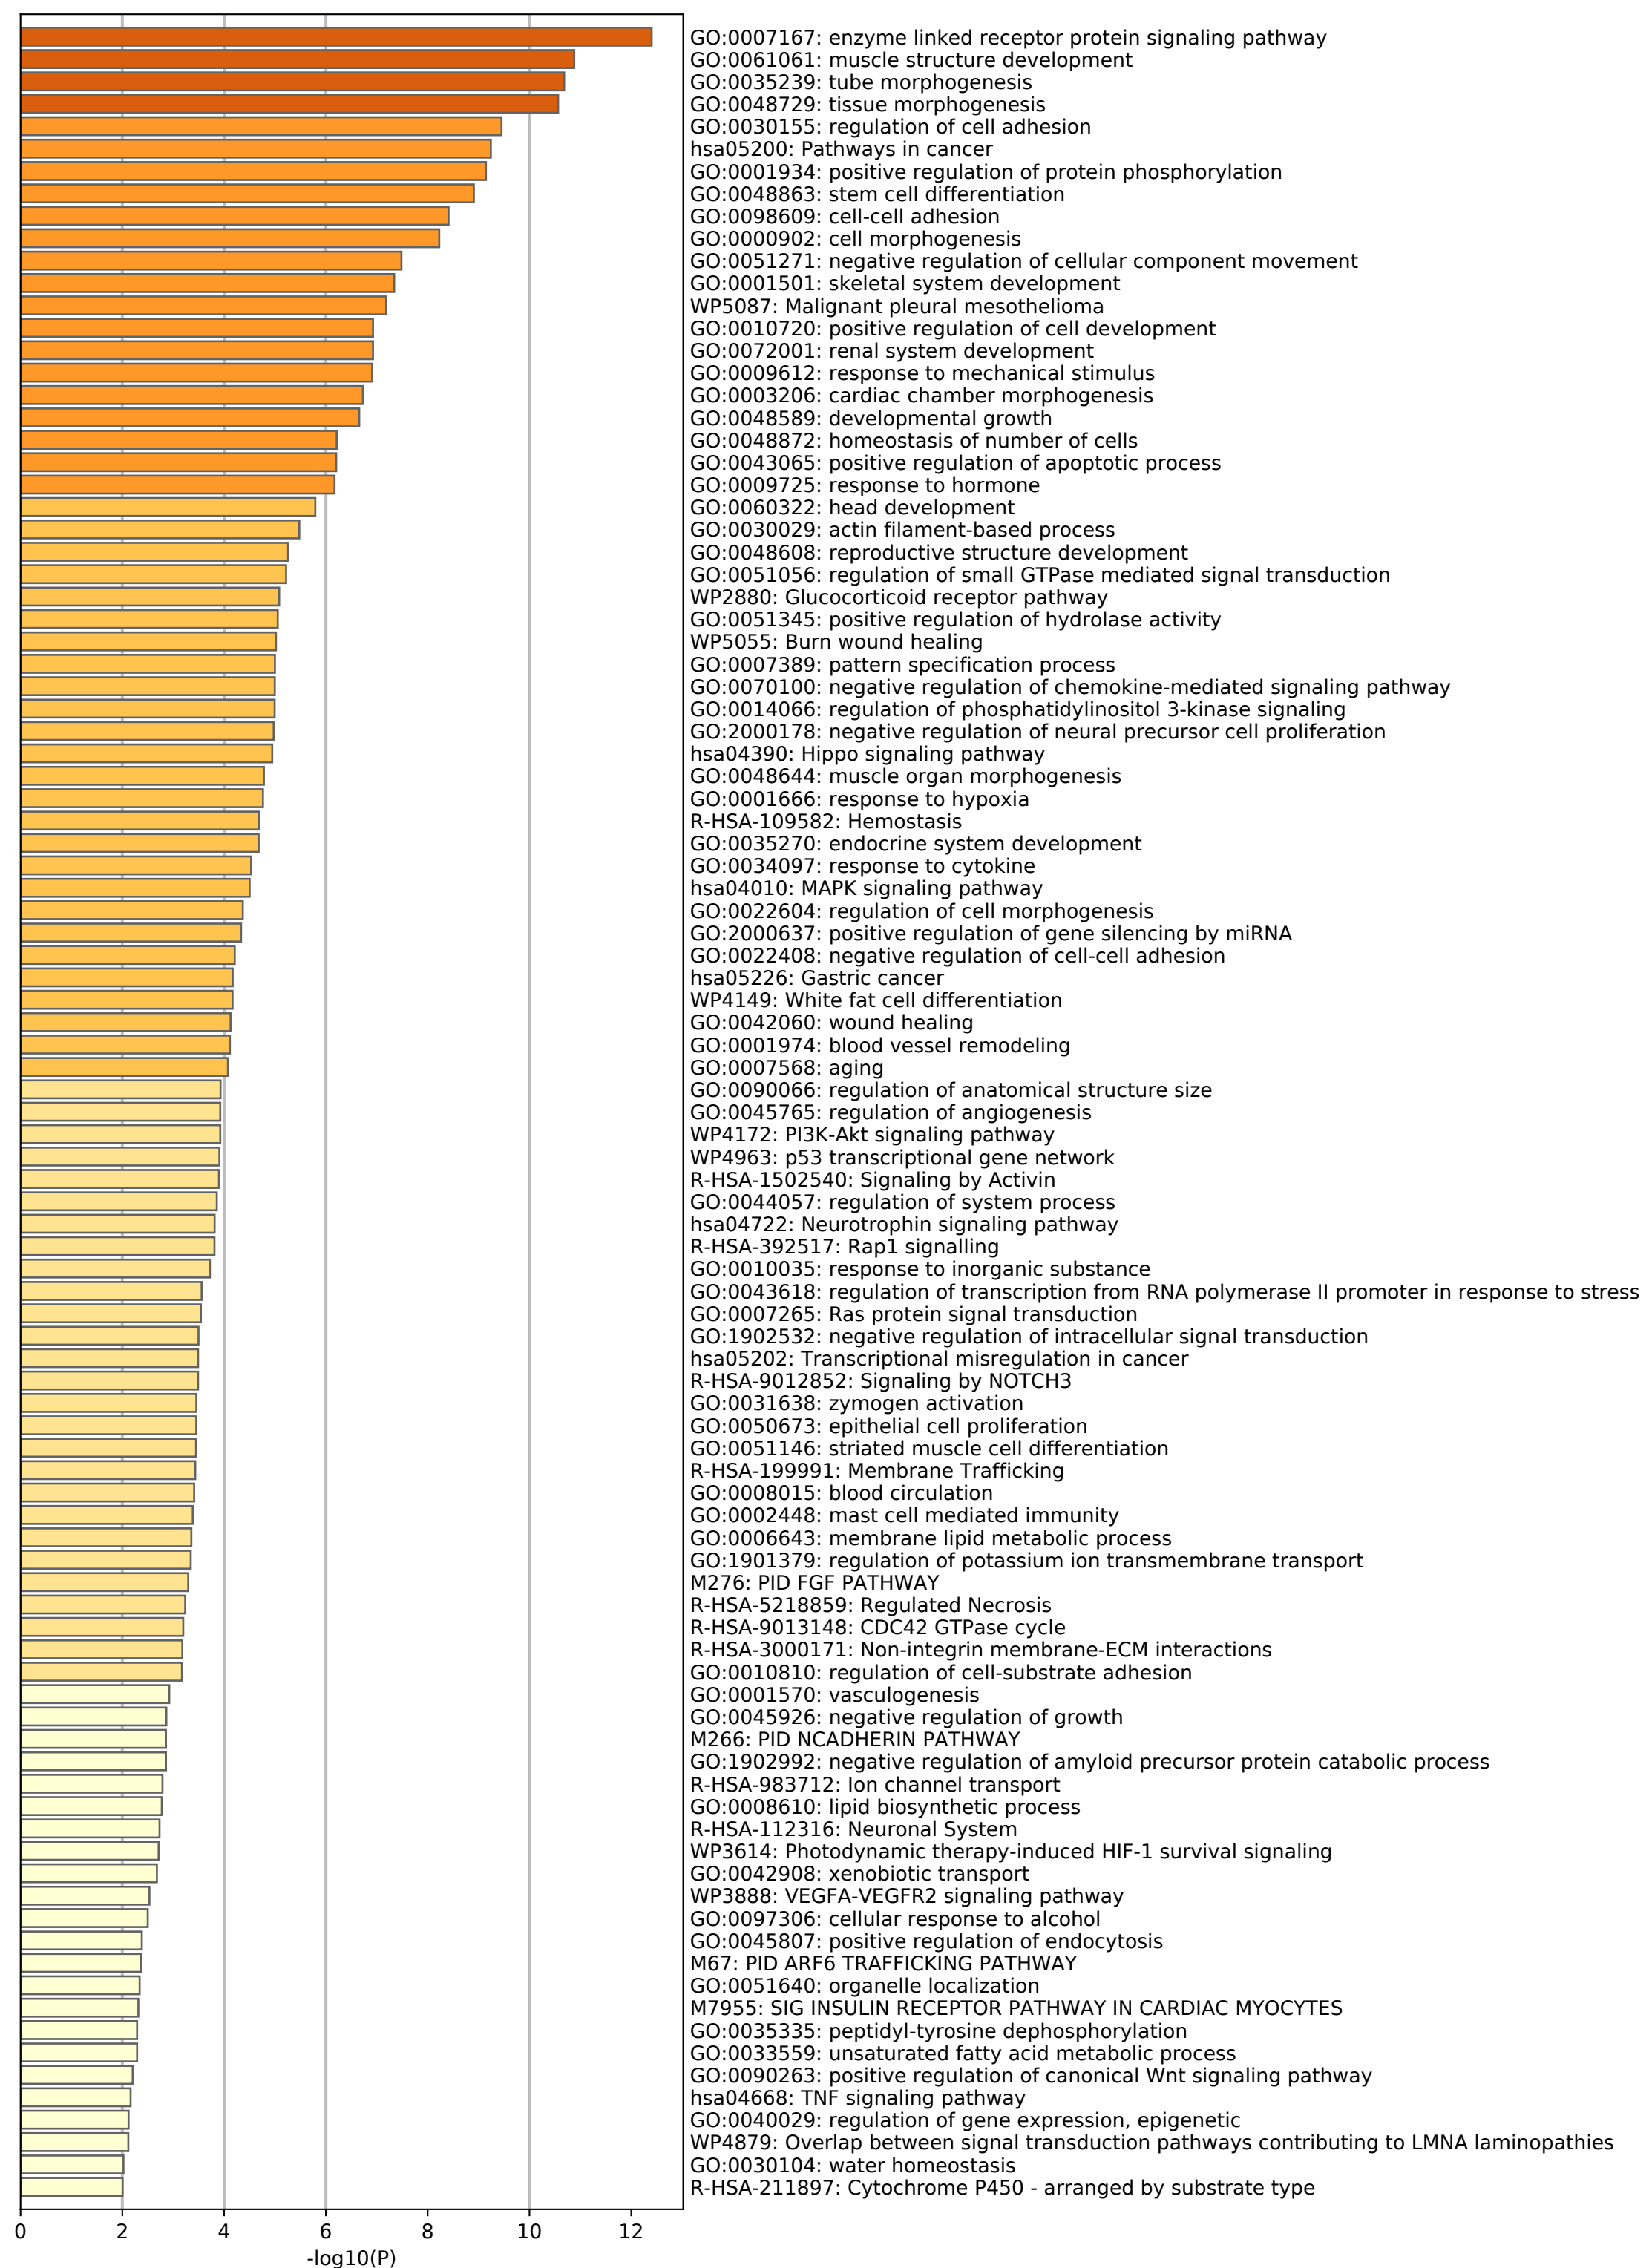

Supplement: table2-data1 [file HeatmapSelectedGOTop100.pdf › Enrichment_heatmap/HeatmapSelectedGOTop100.pdf]

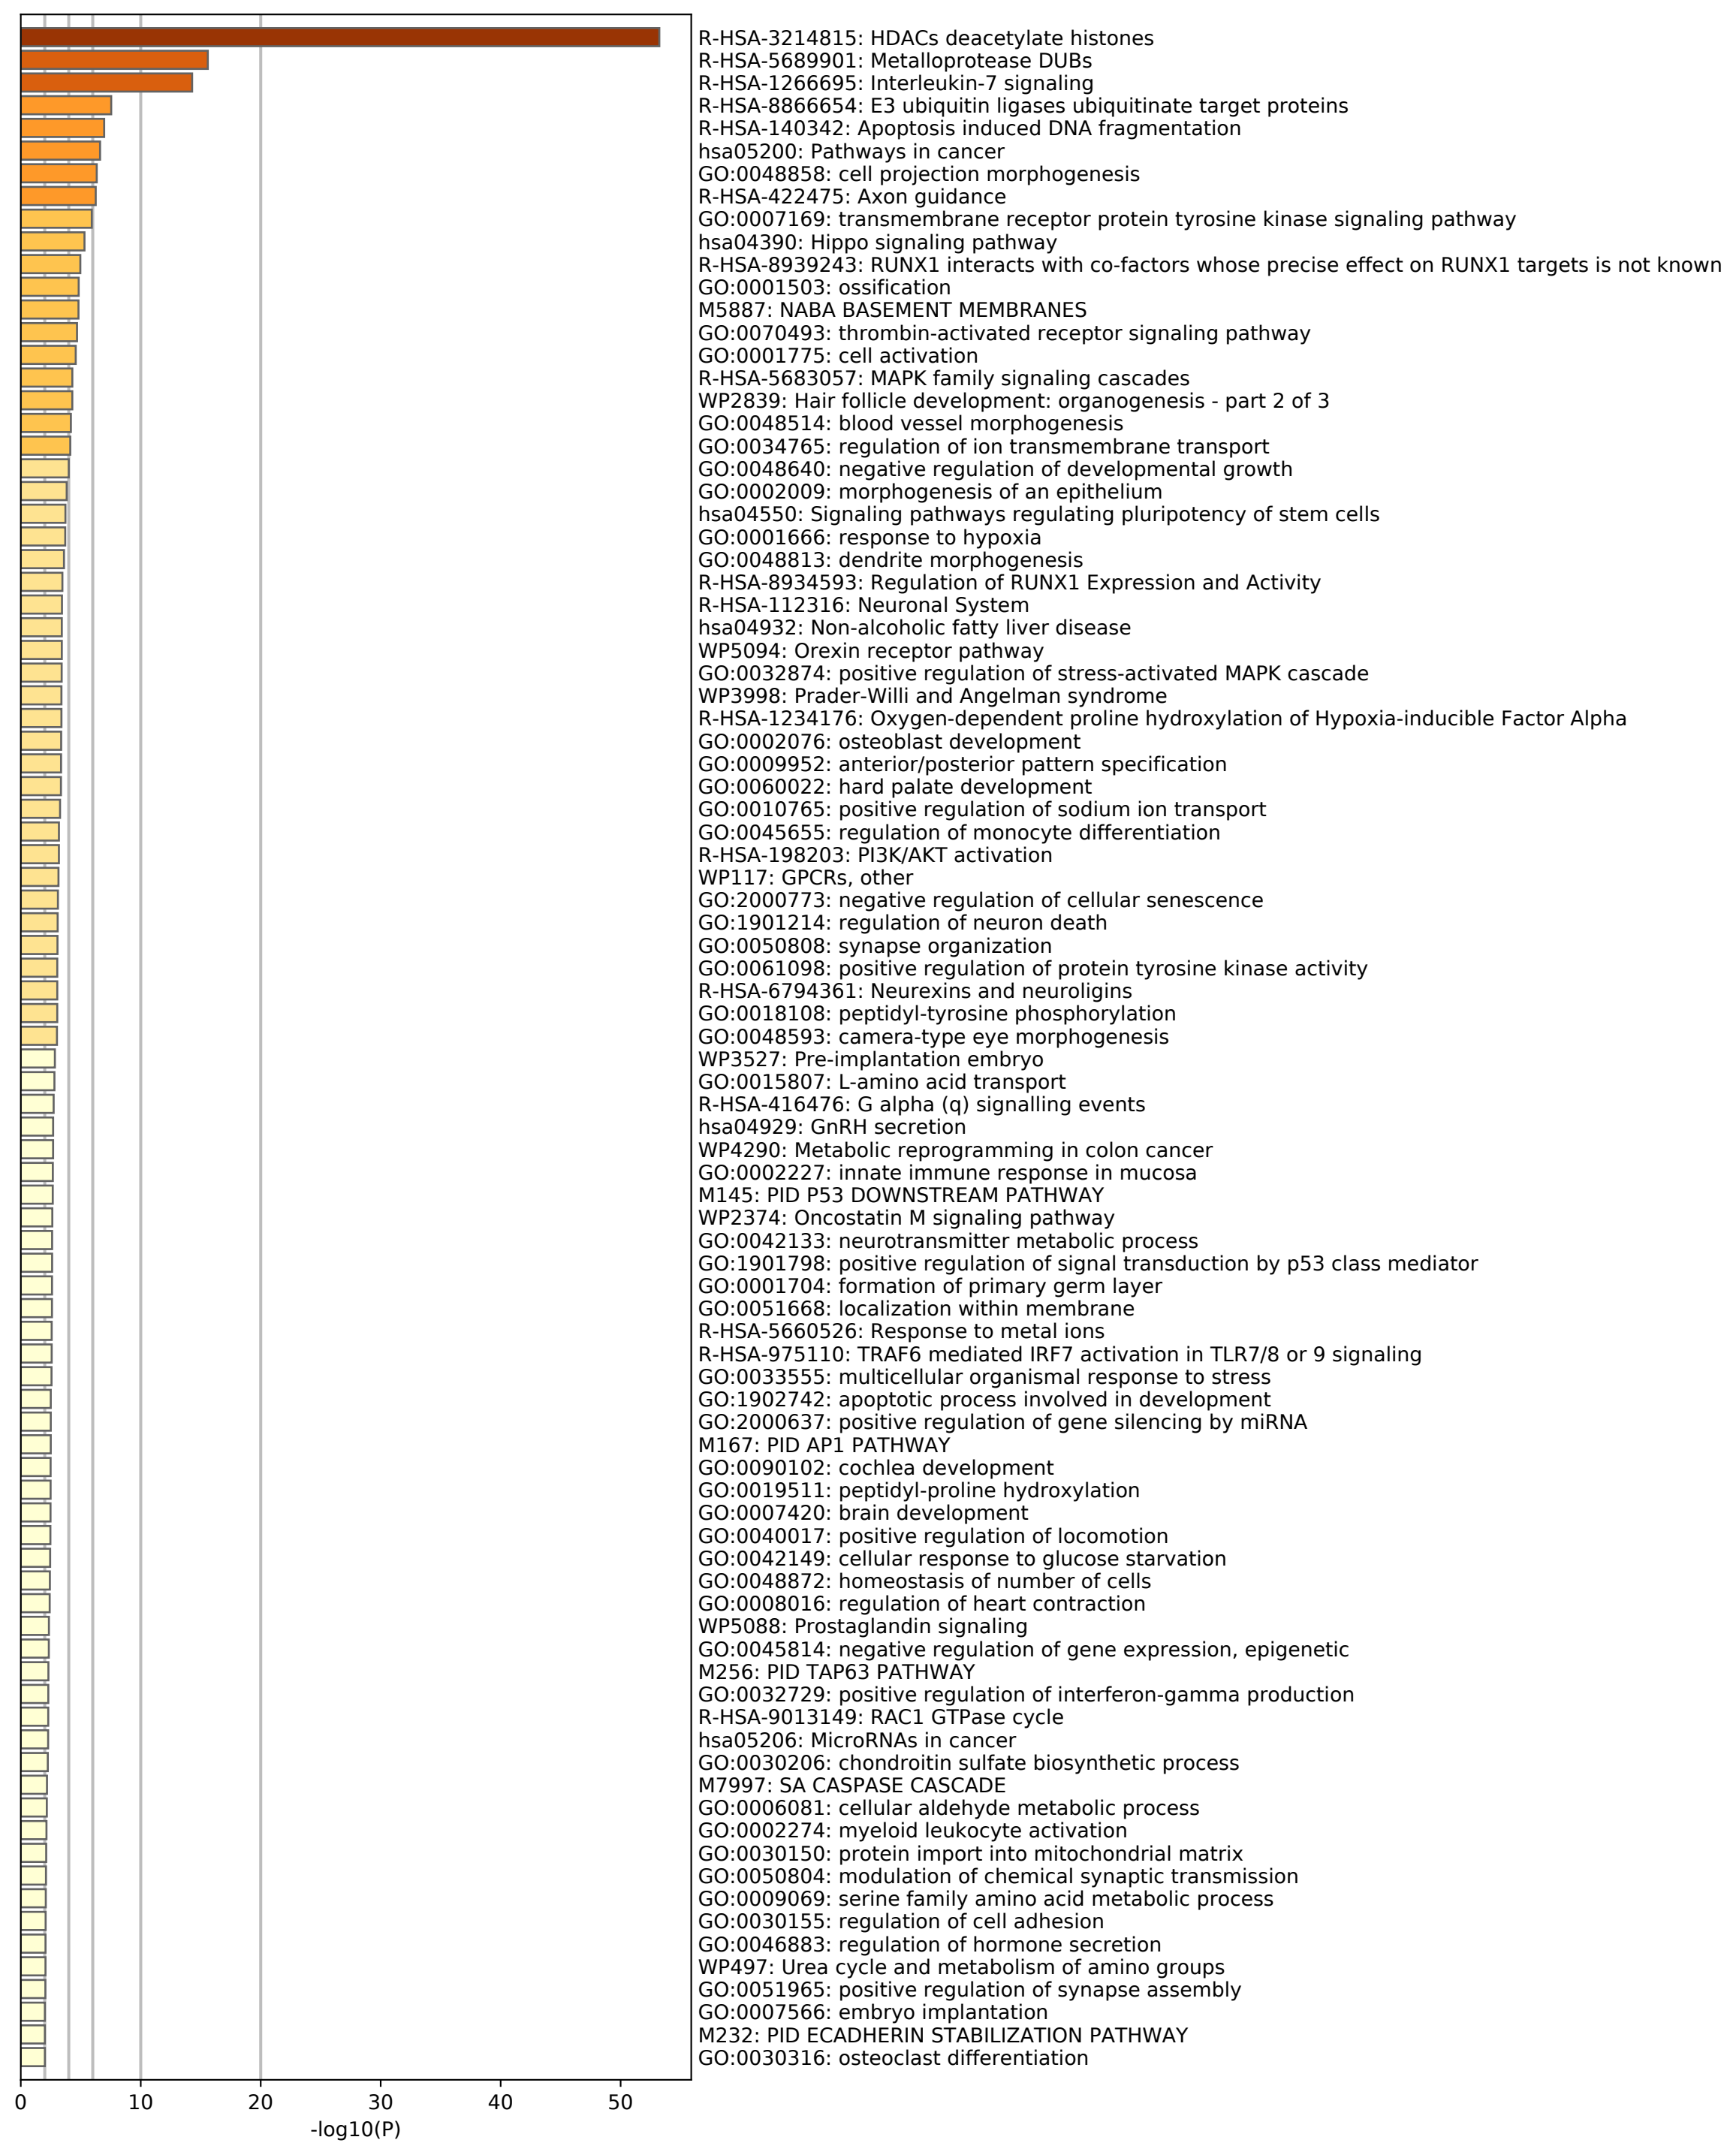

Supplement: table2-data1 [file HeatmapSelectedGOTop100.pdf › Enrichment_heatmap/HeatmapSelectedGOTop100.pdf]

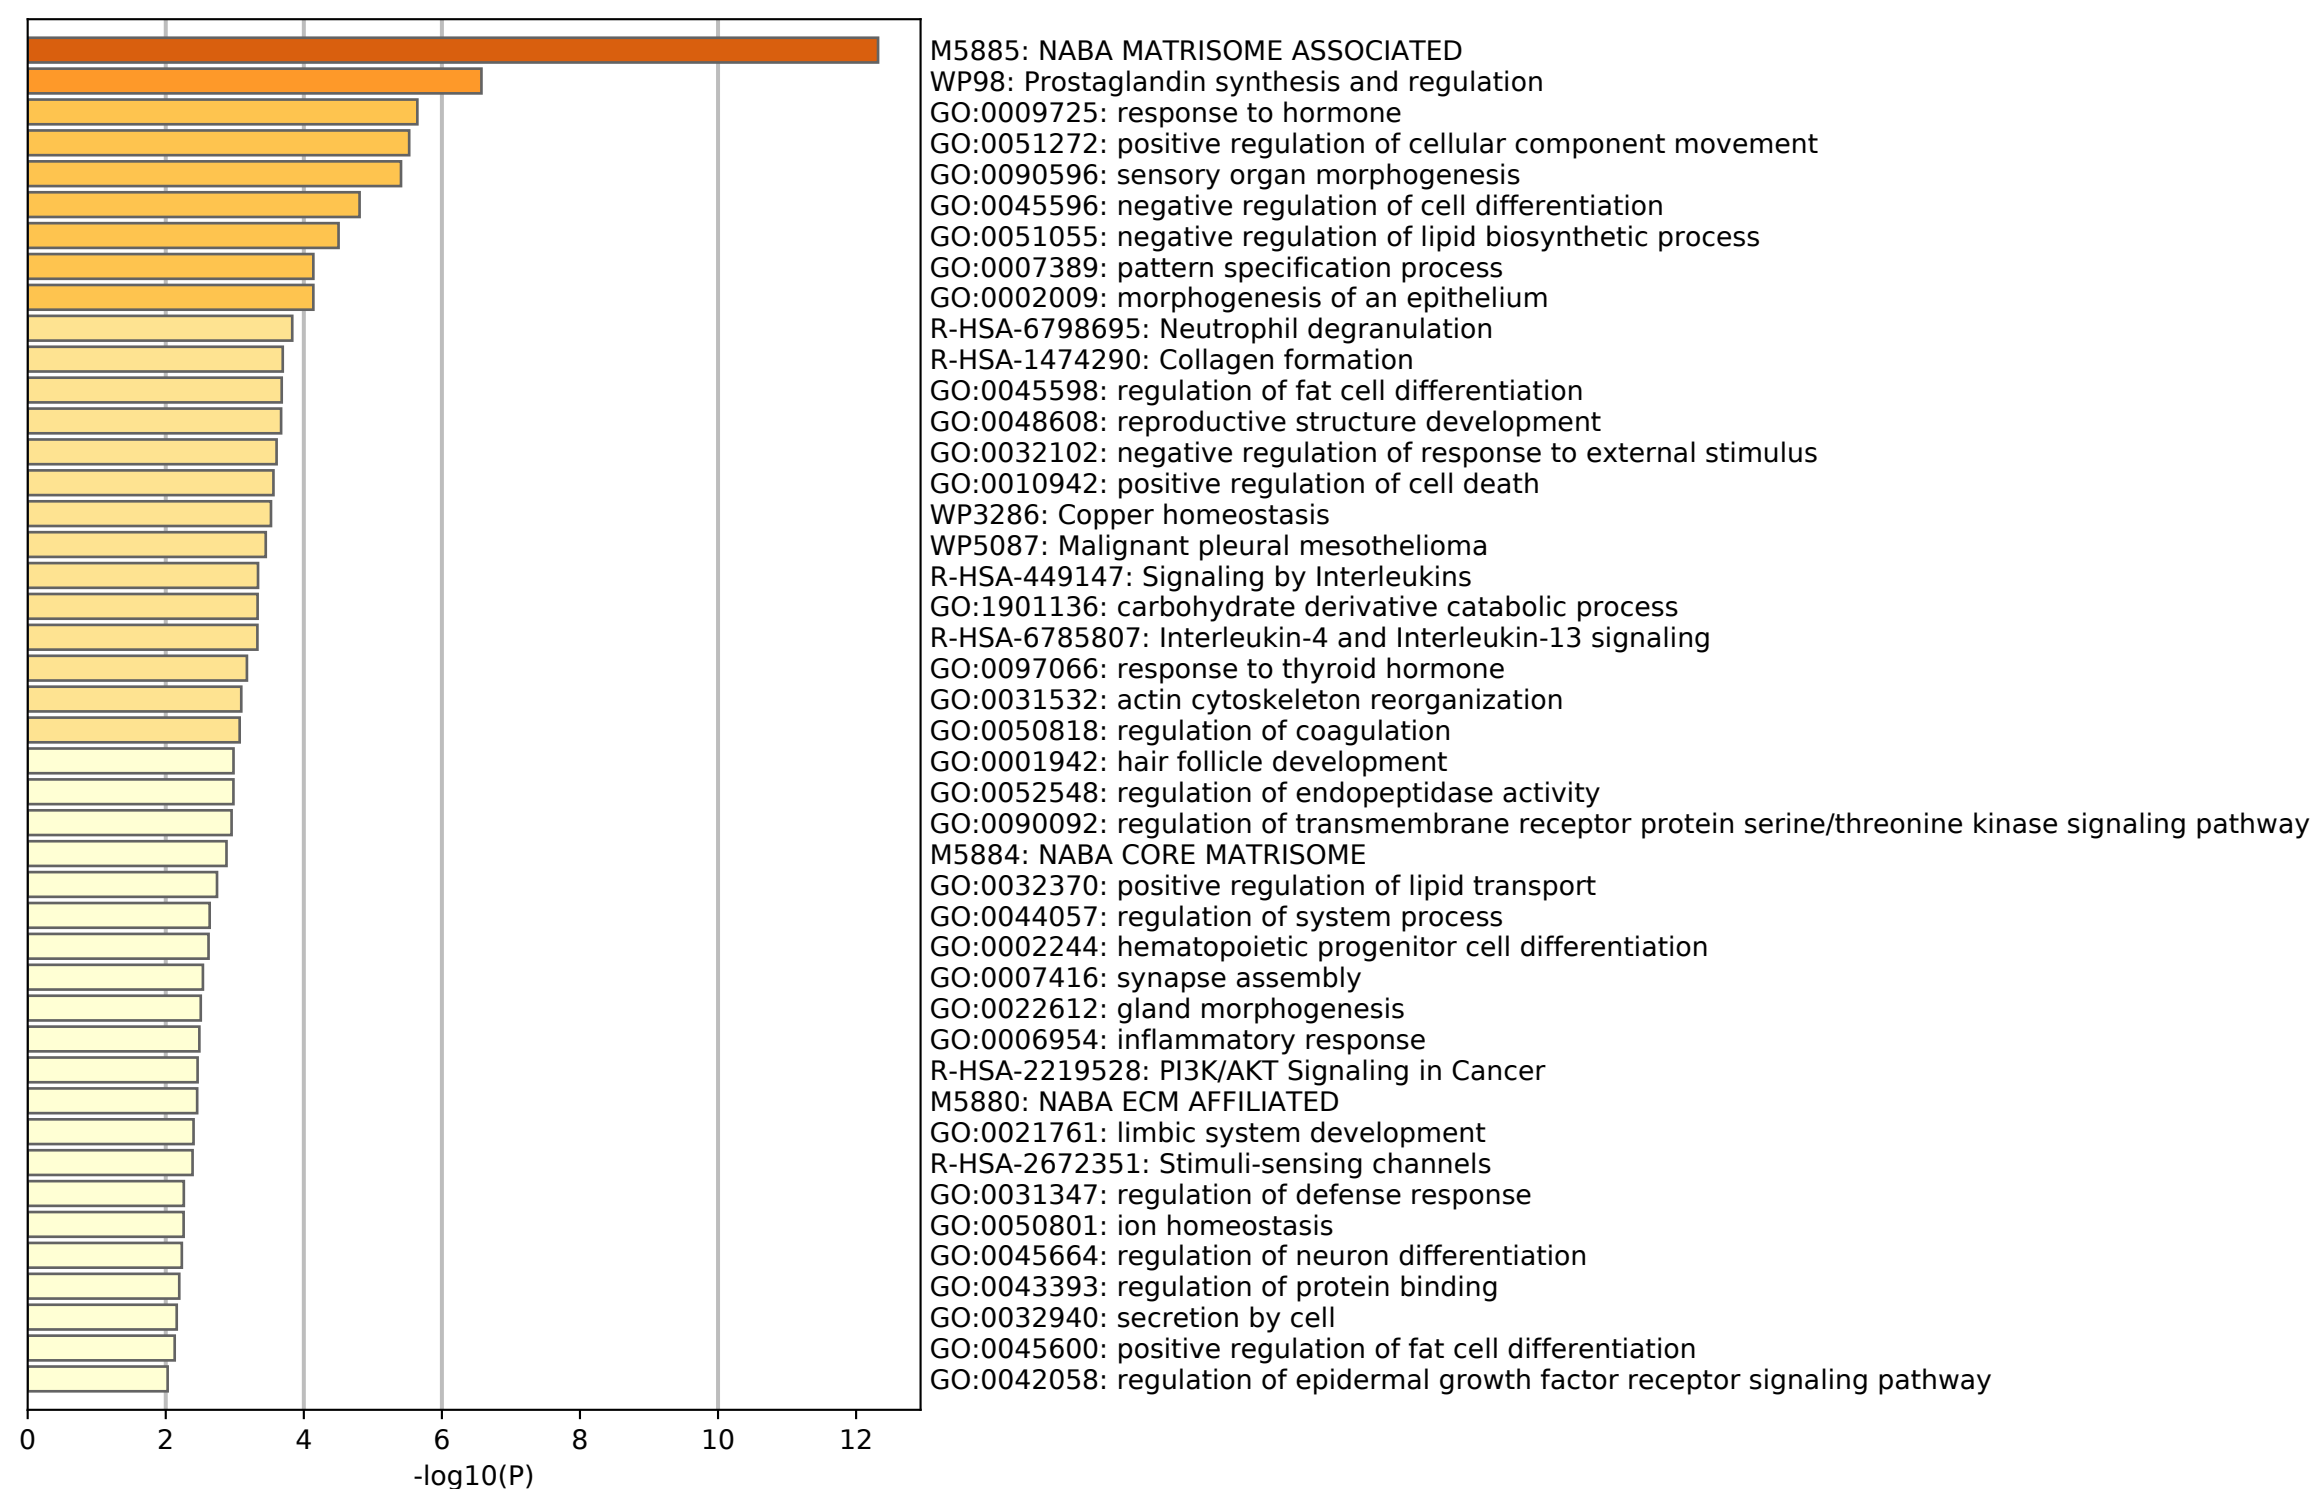

Supplement: table2-data1 [file HeatmapSelectedGOTop100.pdf › Enrichment_heatmap/HeatmapSelectedGOTop100.pdf]
